# Supplementary material (part 1 of 15)
Source: publisher site journal article supplement (http://zookeys.pensoft.net/article/6264/download/suppl/32/)

## Tibia 1/Metatarsus 3 Length ratio – females

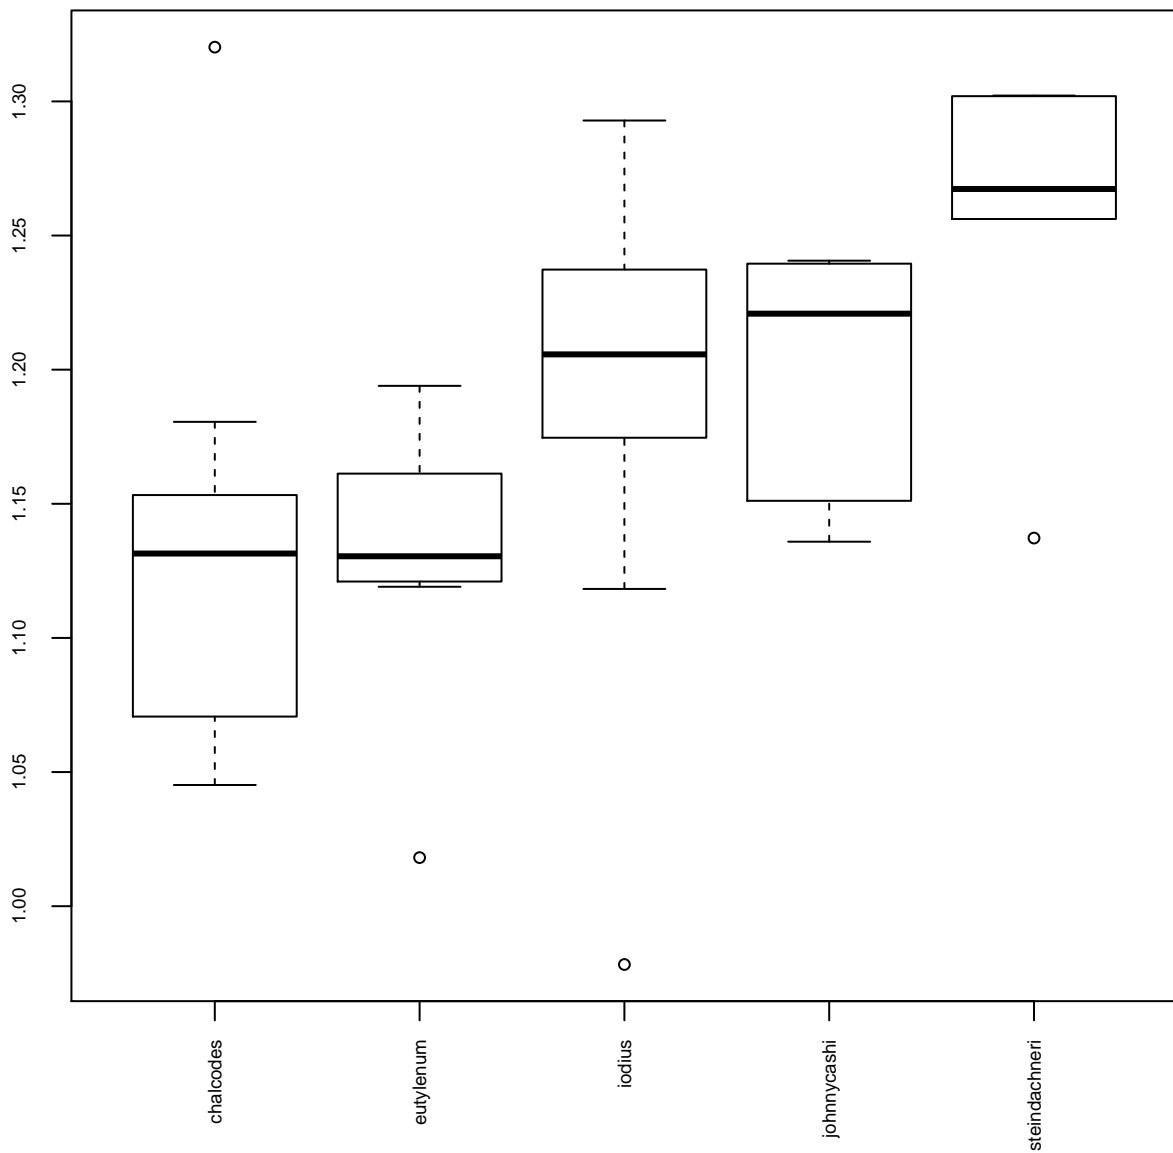

Supplement: Supplementary file 1

## Tarsus 3/Patella 4 Length ratio – males

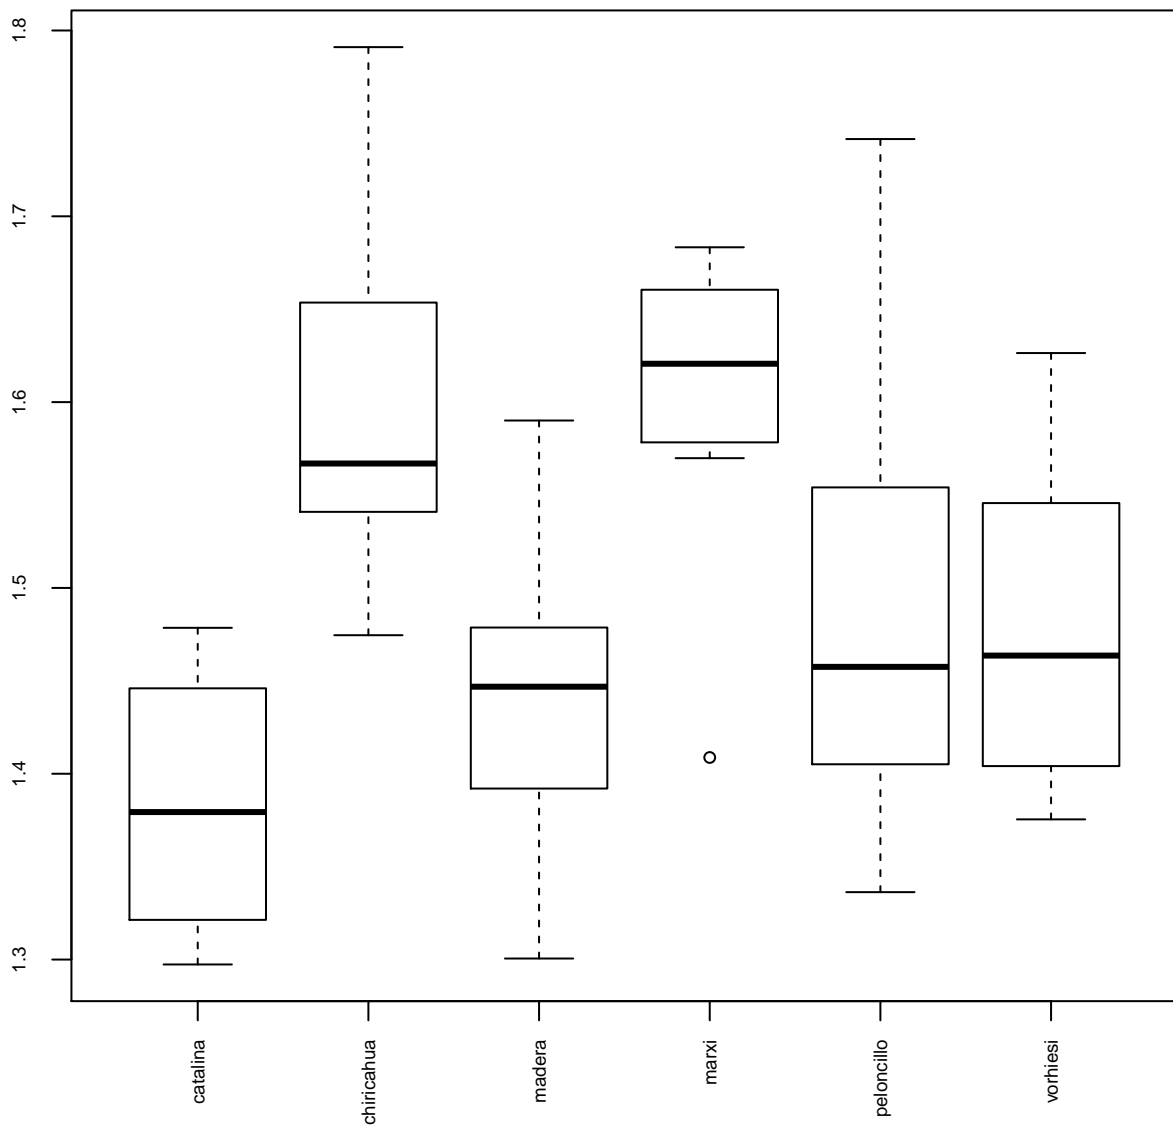

Supplement: Supplementary file 2

# Leg 1 Length/Carapace Length ratio – females

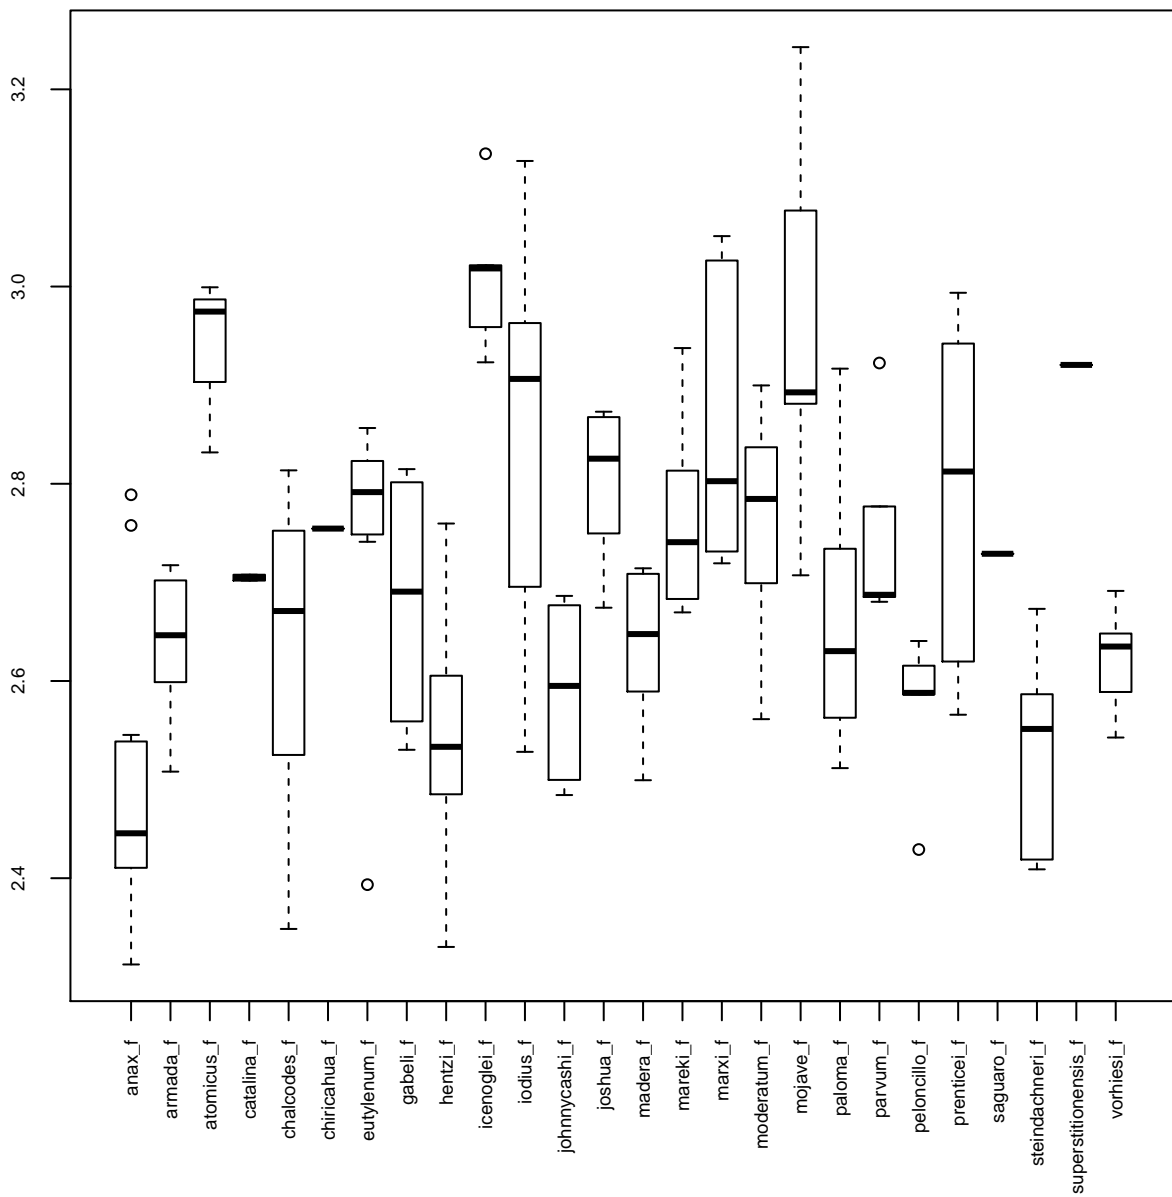

Supplement: Supplementary file 3

# Patella 1/Tarsus 4 Length ratio – females

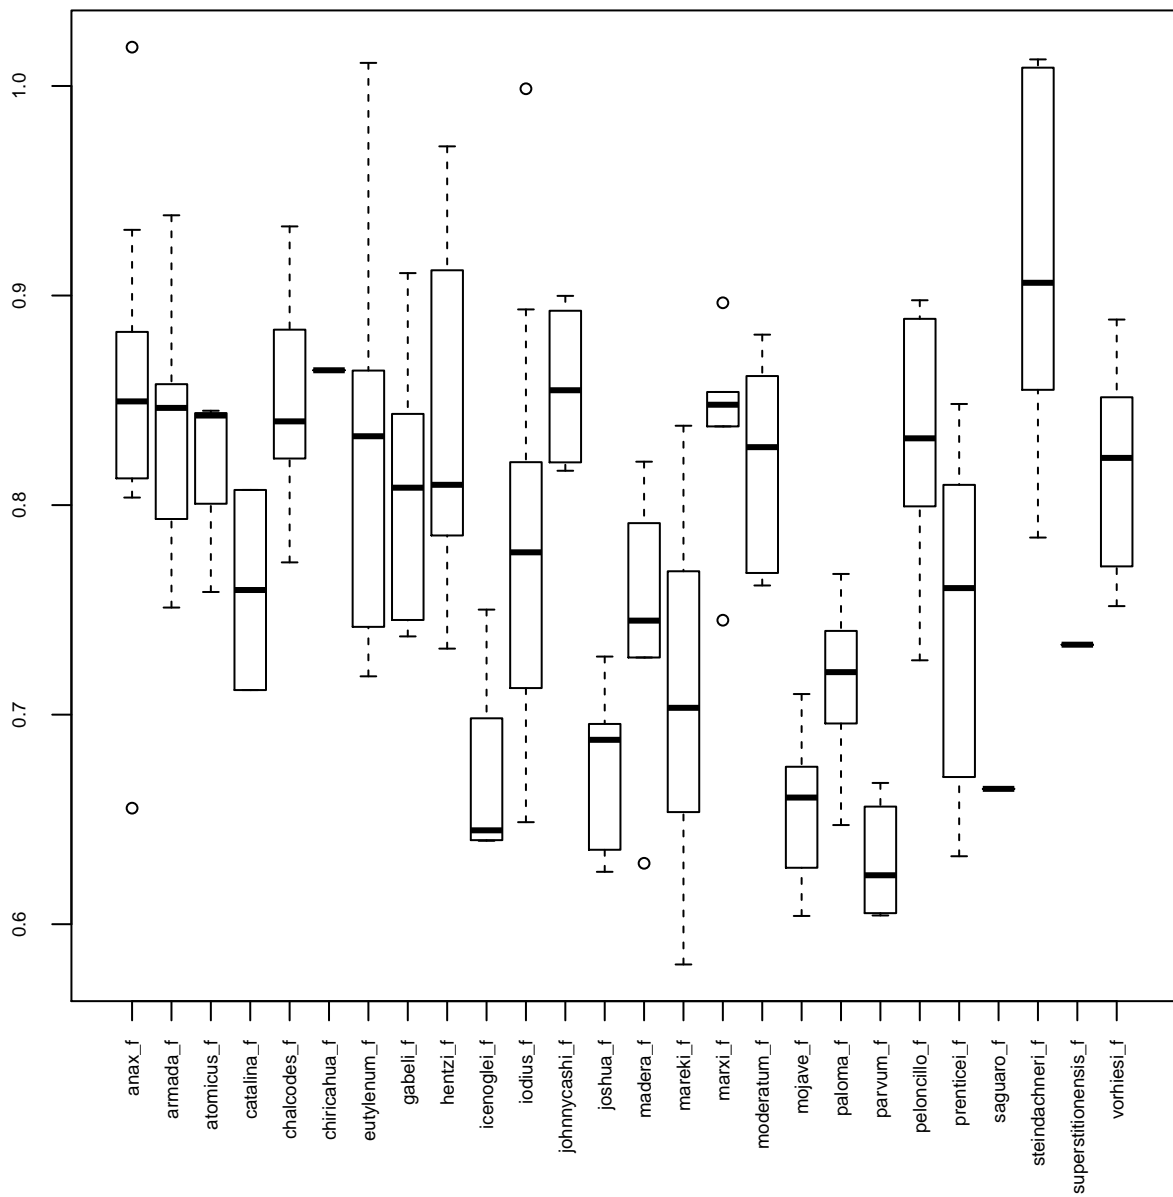

Supplement: Supplementary file 4

# Carapace Length/Femur 1 ratio – females

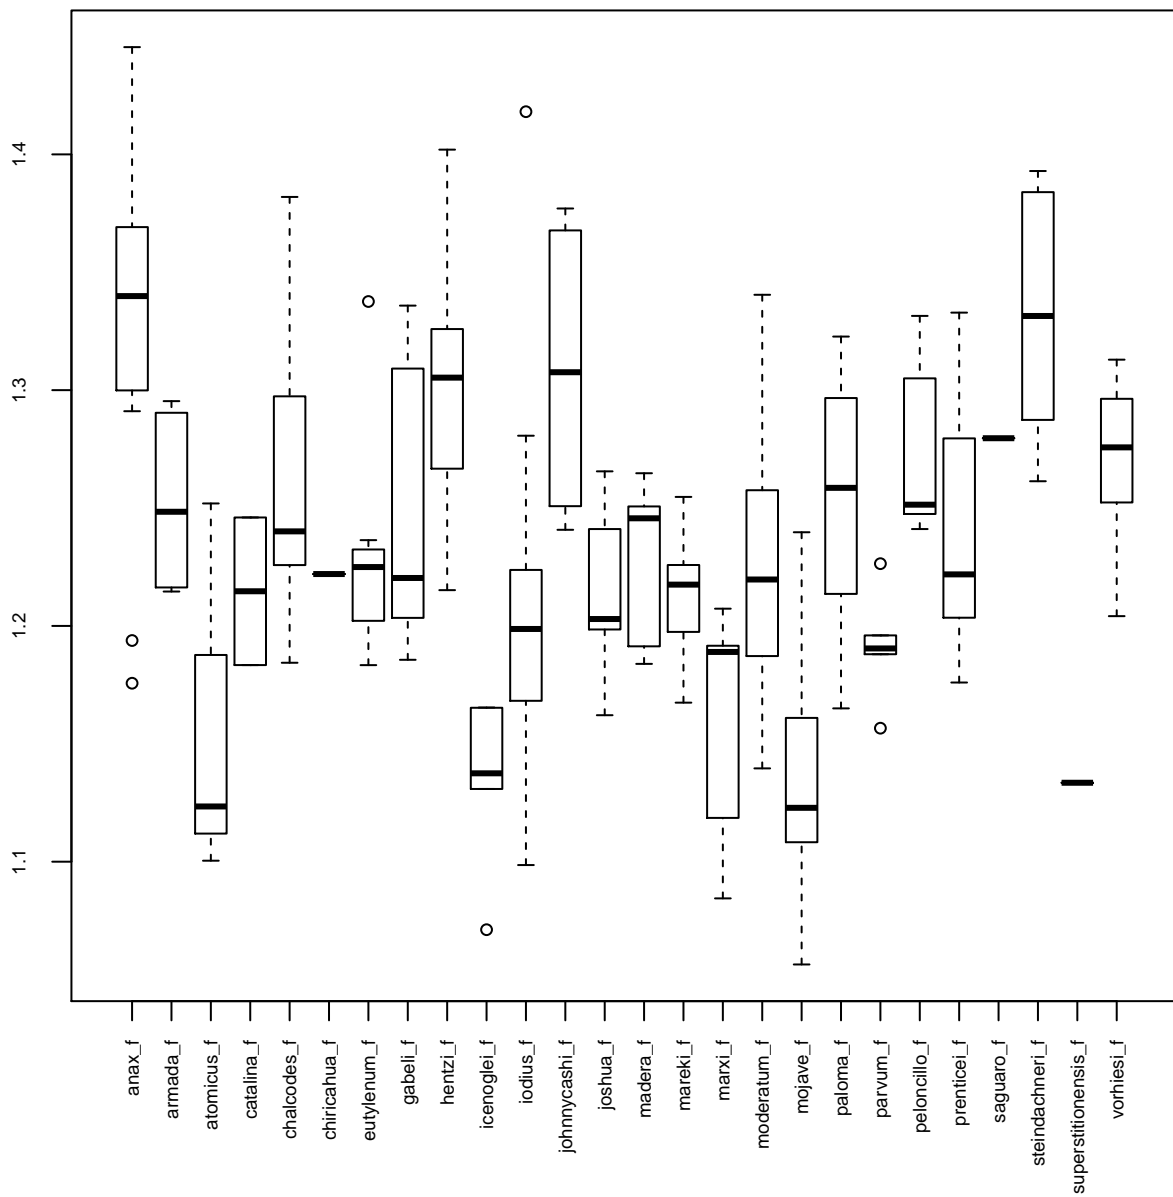

Supplement: Supplementary file 5

## Leg 3 Length/Carapace Length ratio – females

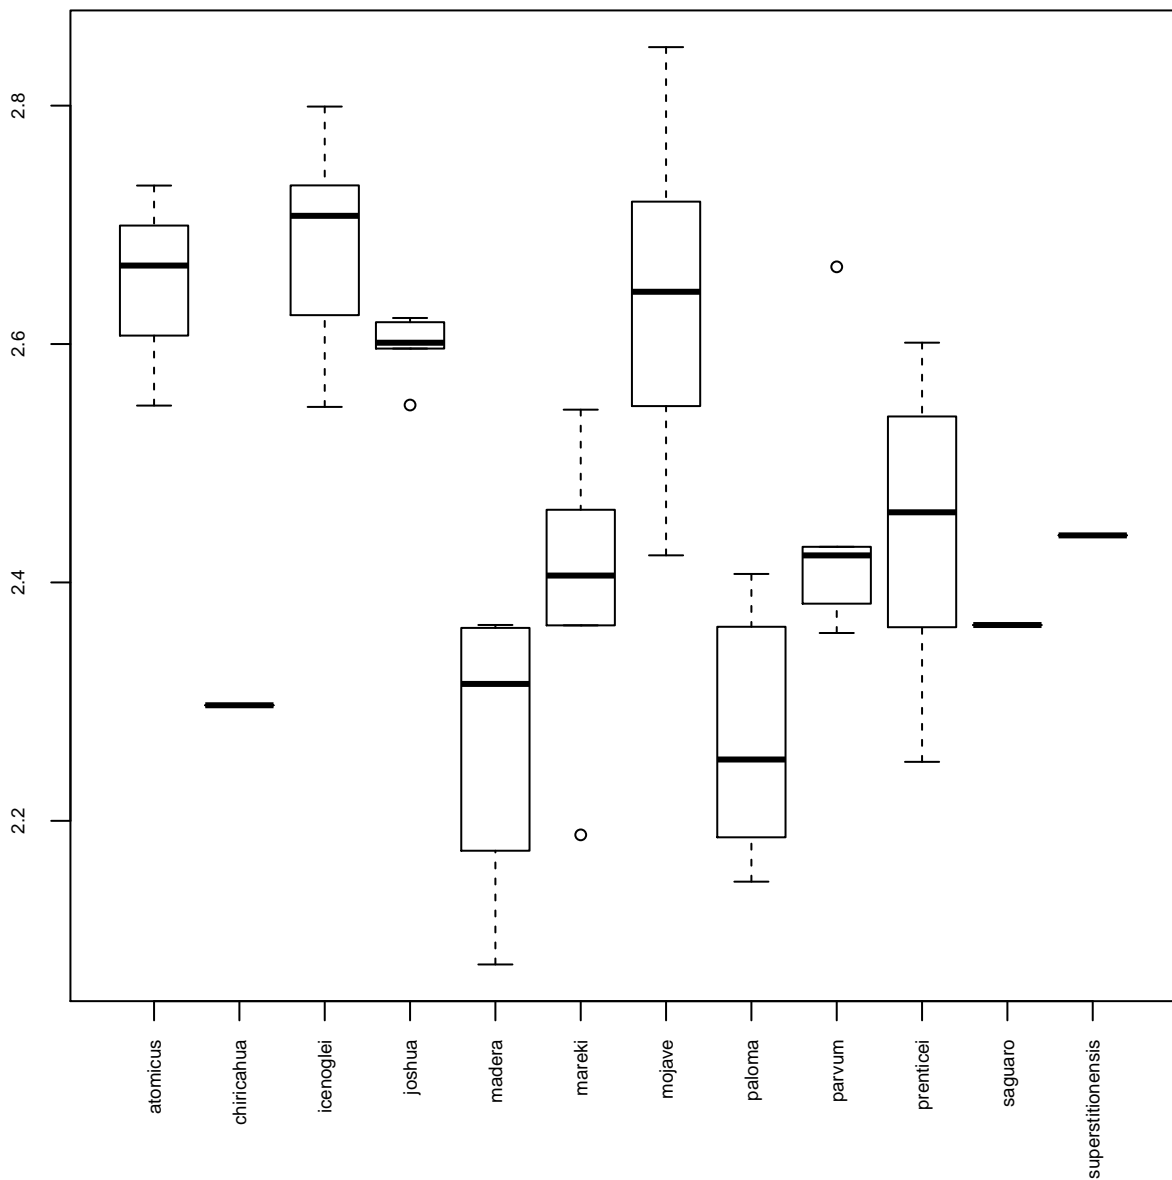

Supplement: Supplementary file 6

## Tibia 1/Tibia 3 ratio – females

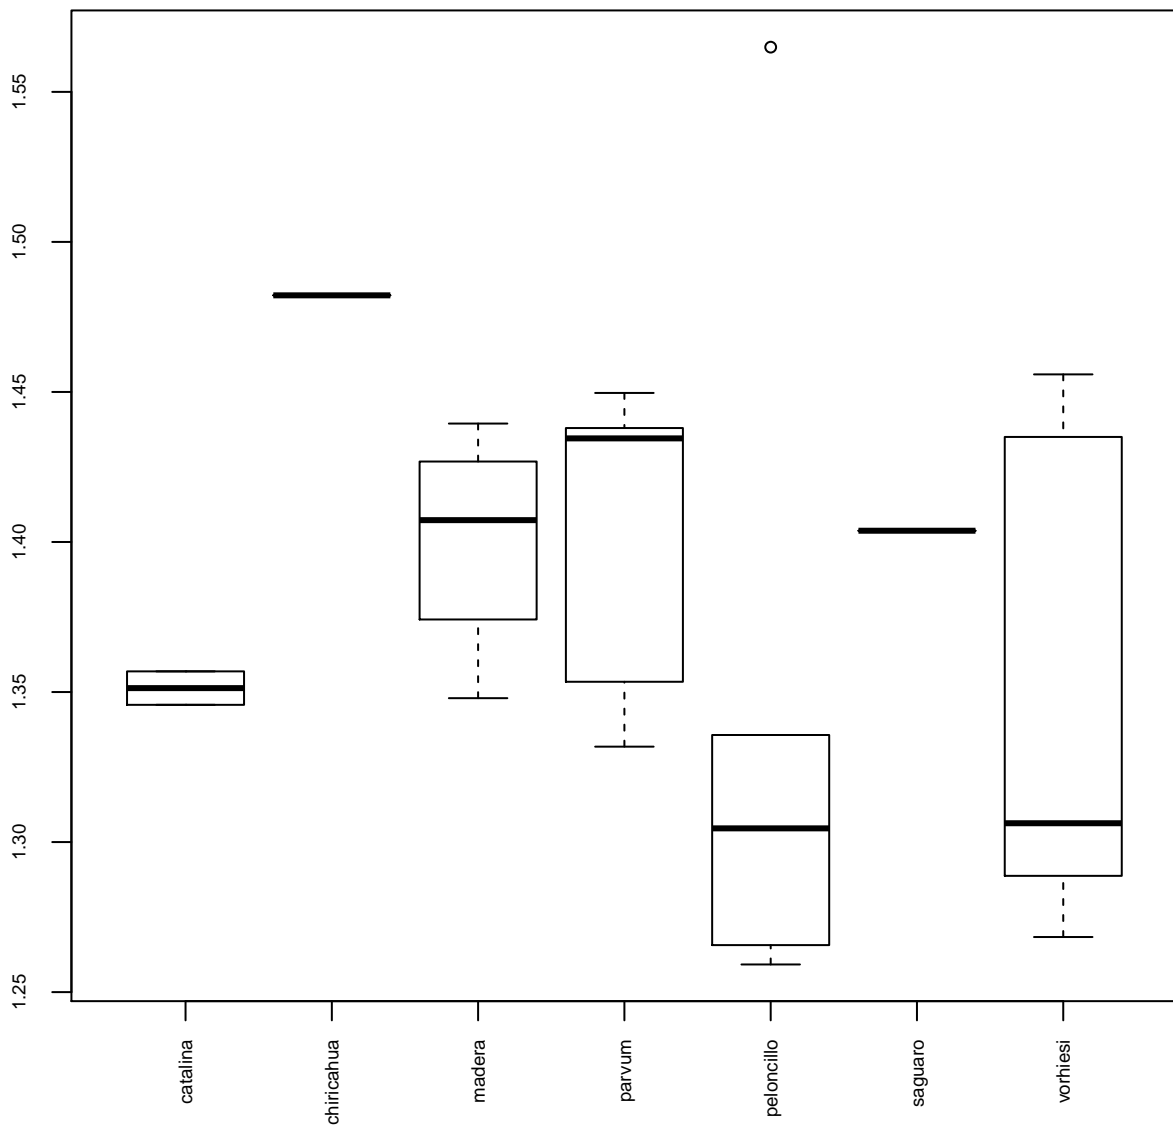

Supplement: Supplementary file 7

# Tibia 1/Patella 3 Length ratio – males

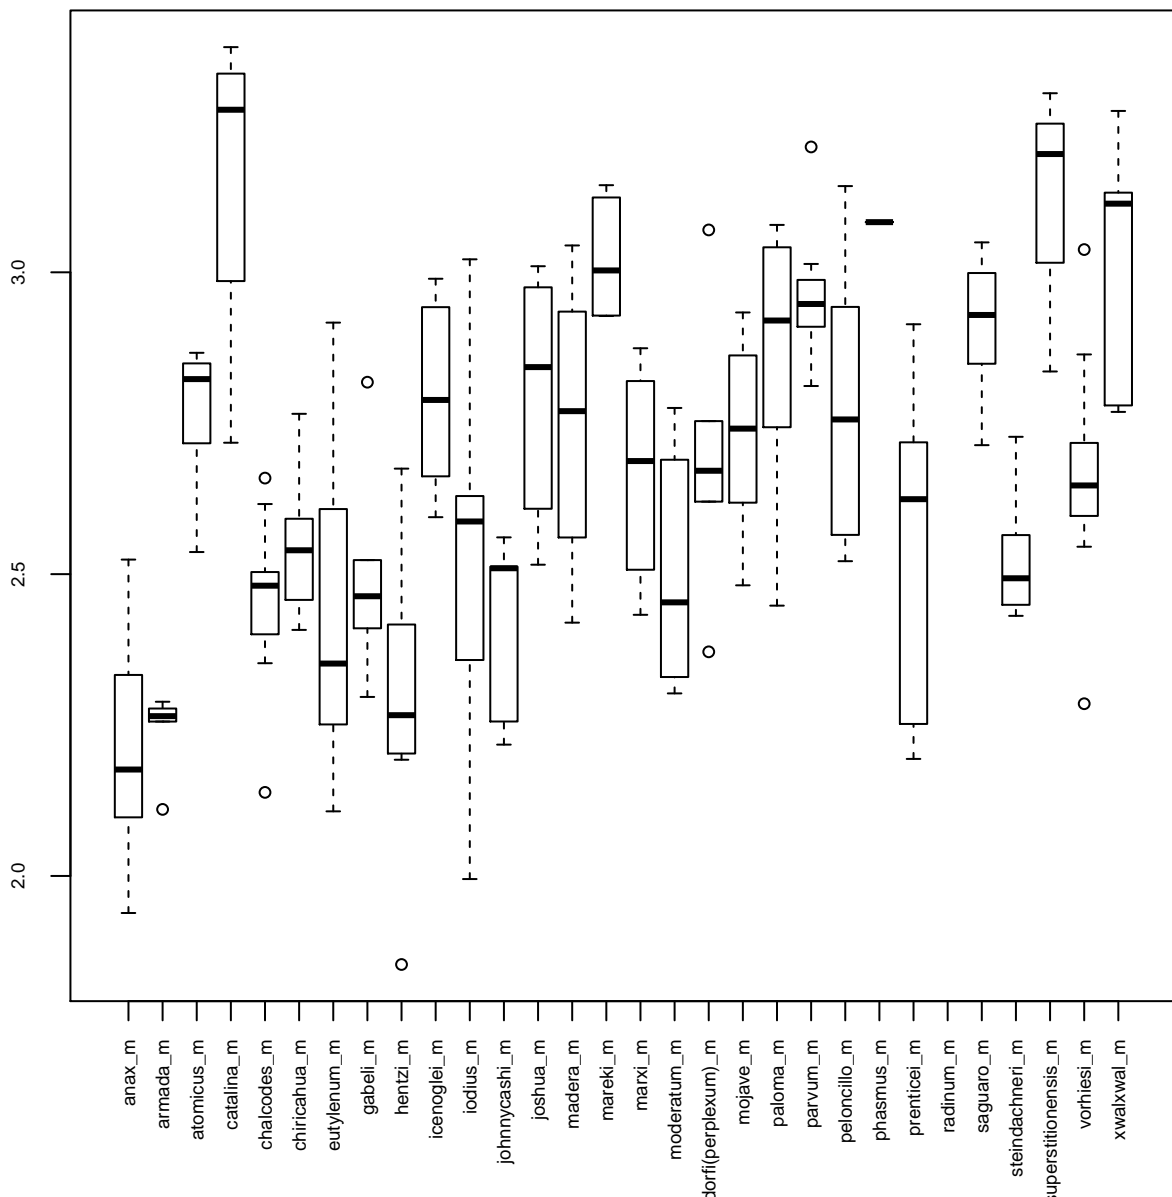

Supplement: Supplementary file 8

## Tibia 1/Femur 3 Length ratio – males

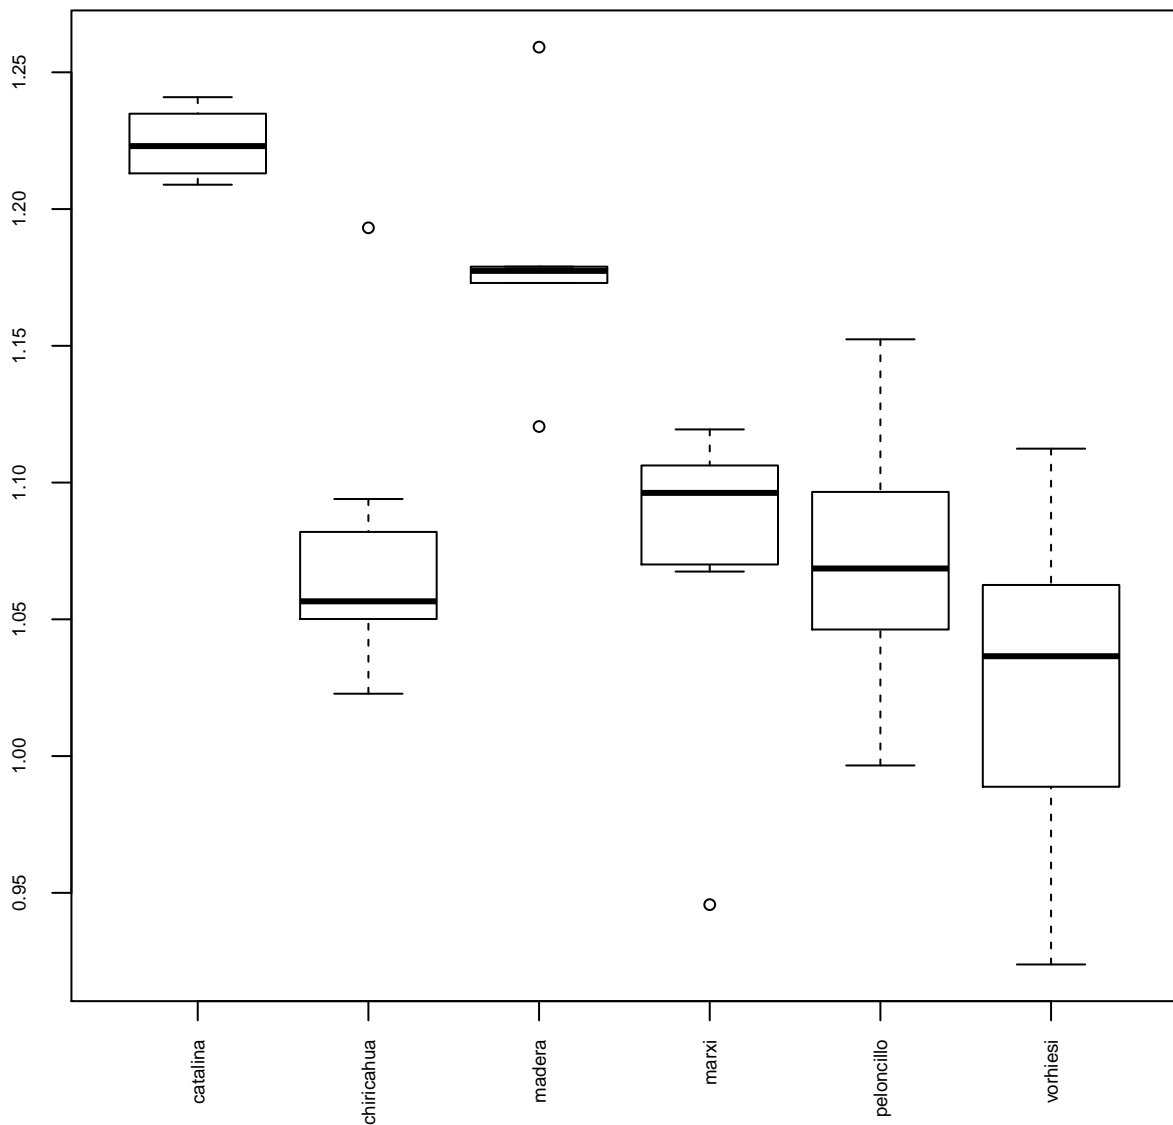

Supplement: Supplementary file 9

**Tibia 1/Tibia 3 ratio – females**

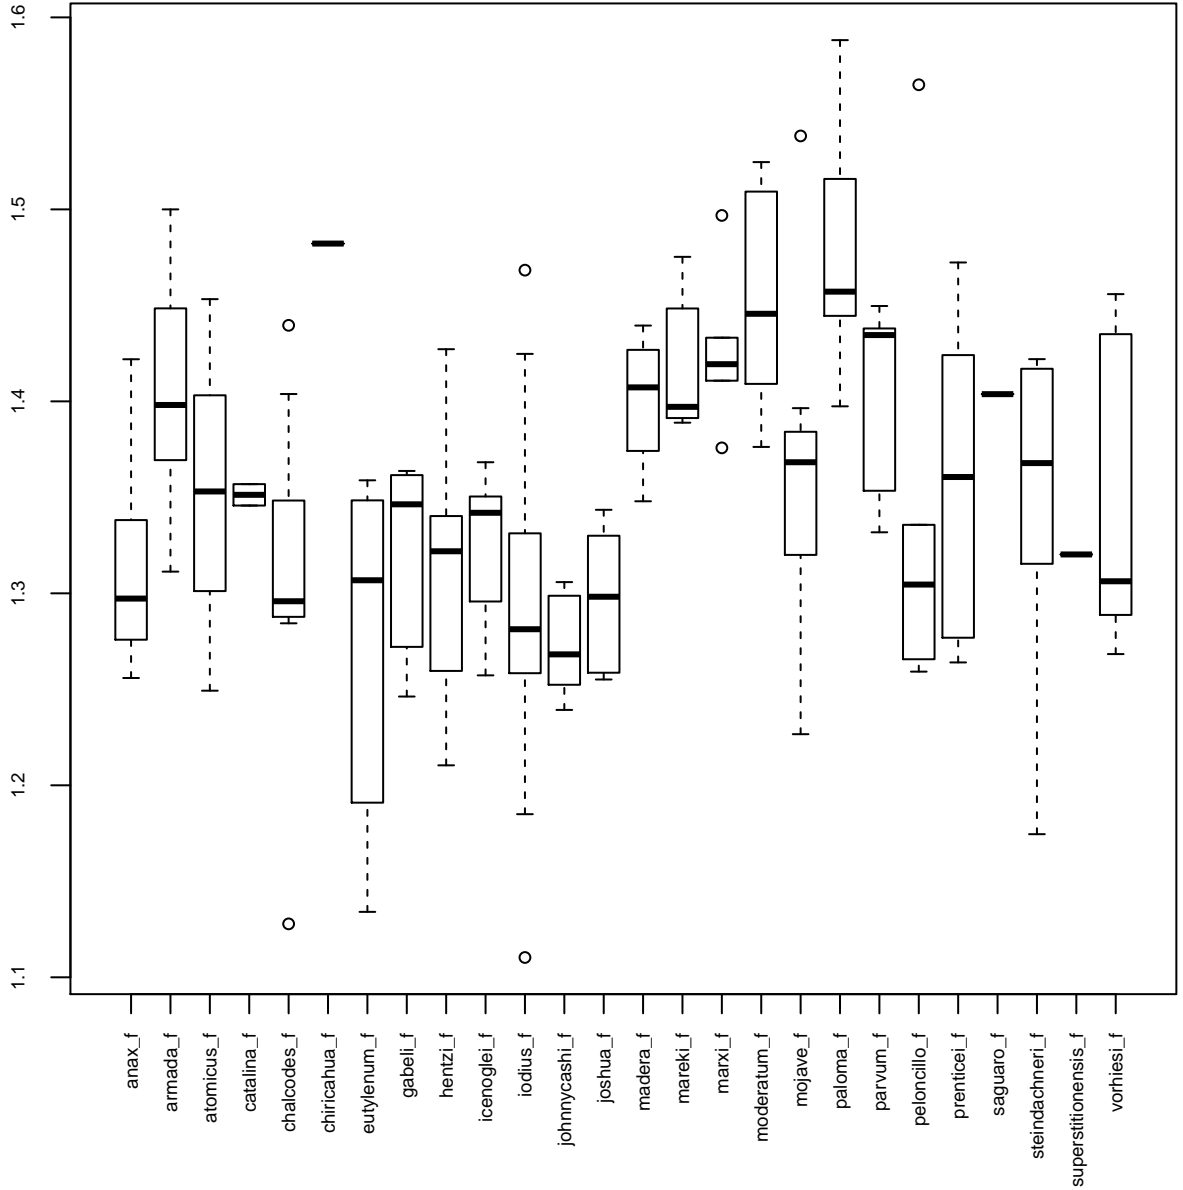

Supplement: Supplementary file 10

# Metatarsus 3/Femur 4 Length ratio – females

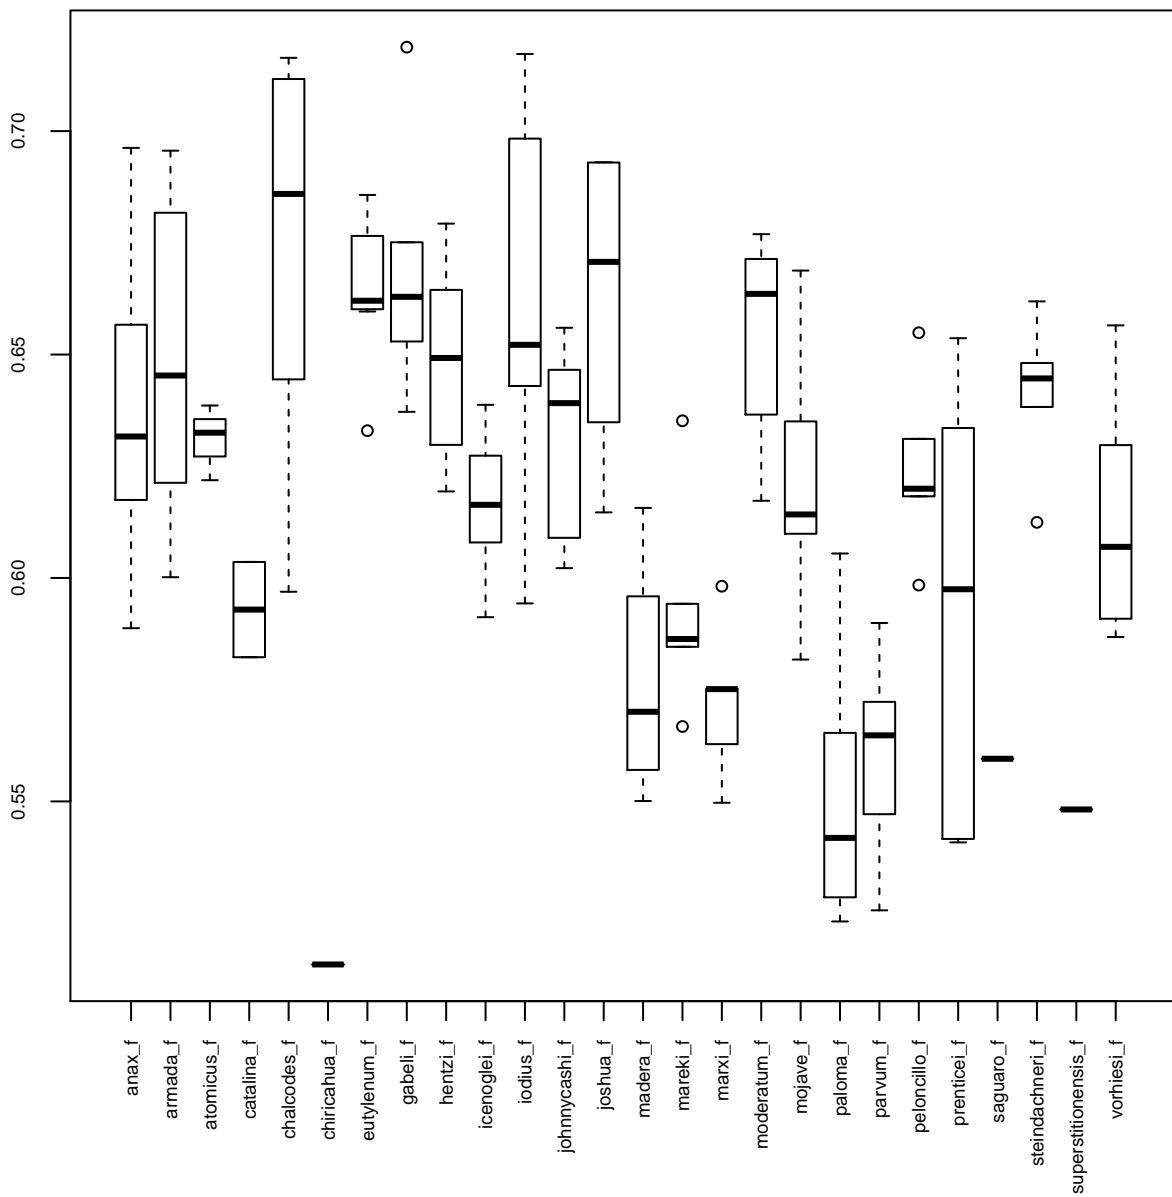

Supplement: Supplementary file 11

## Patella 1/Patella 3 ratio – males

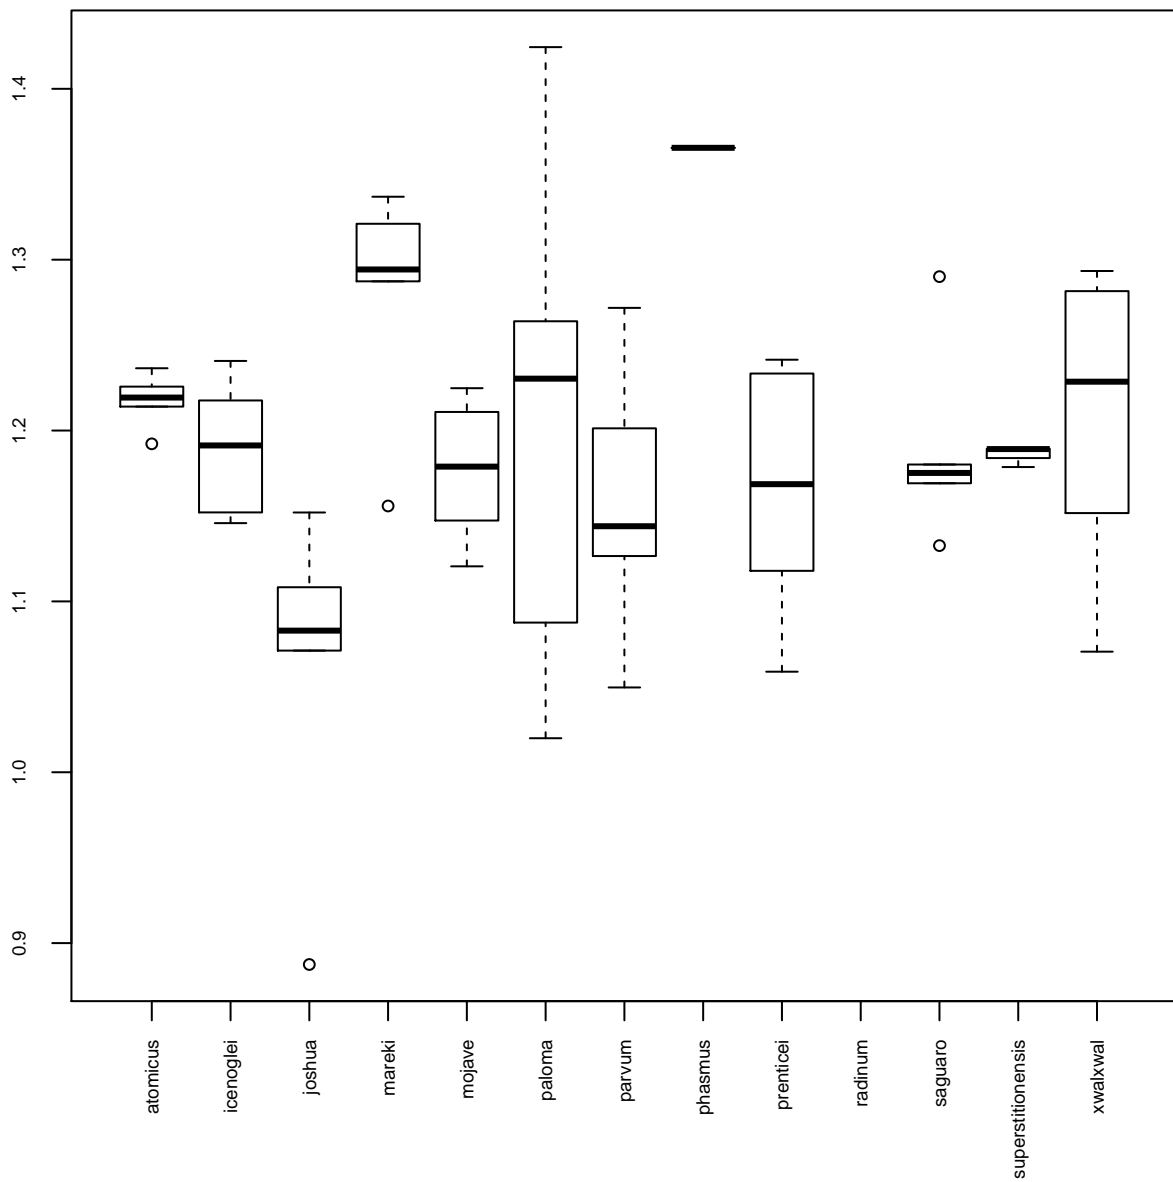

Supplement: Supplementary file 12

## Carapace Length/Tarsus 4 ratio – males

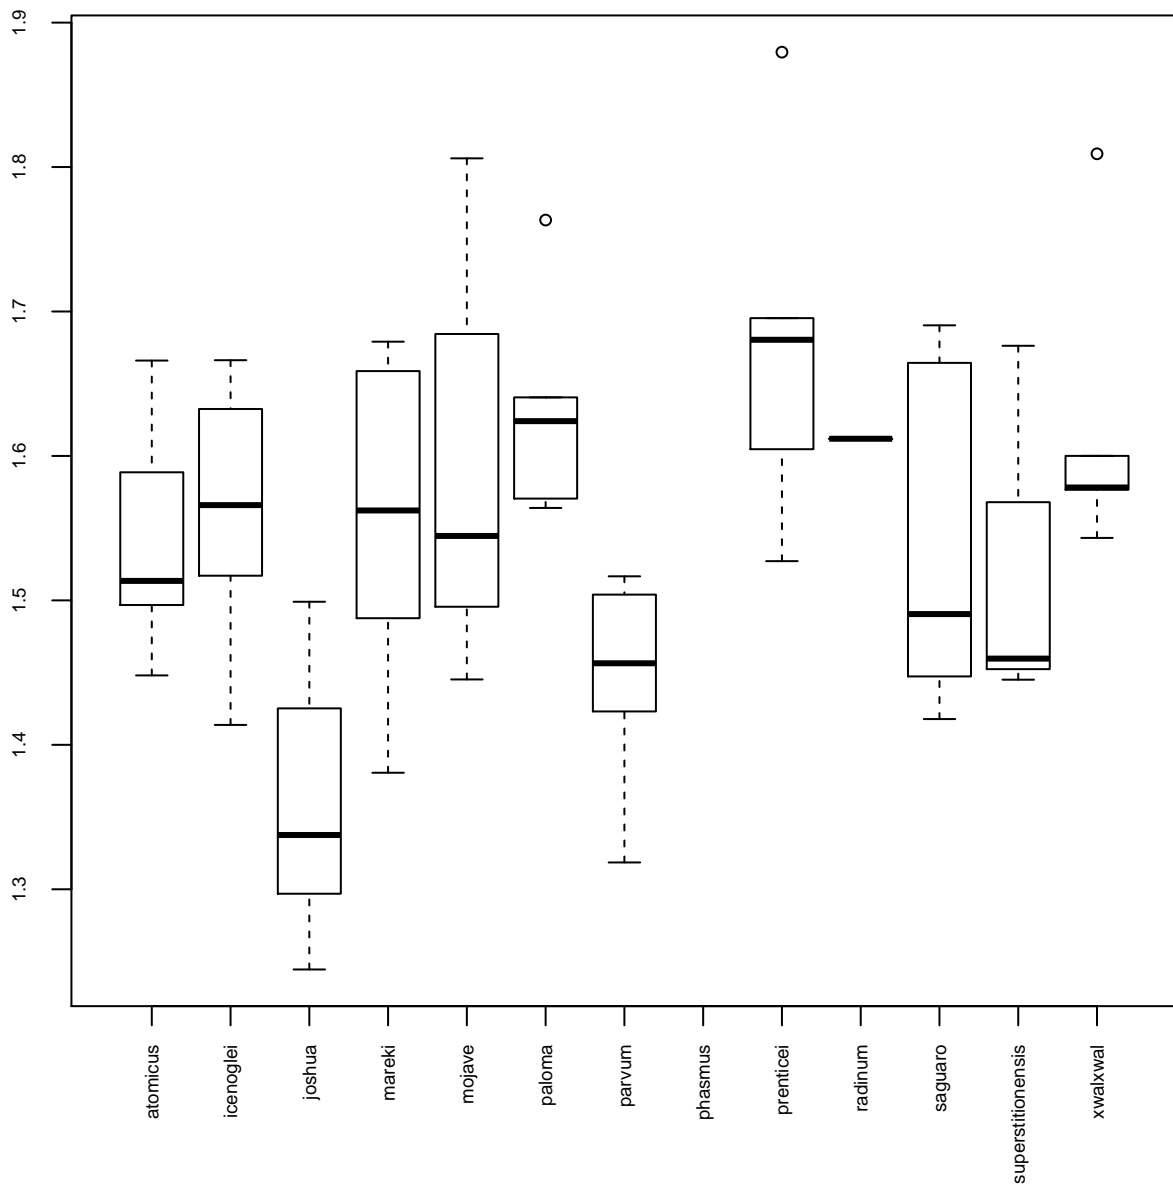

Supplement: Supplementary file 13

## Metatarsus 1/Tibia 3 Length ratio – females

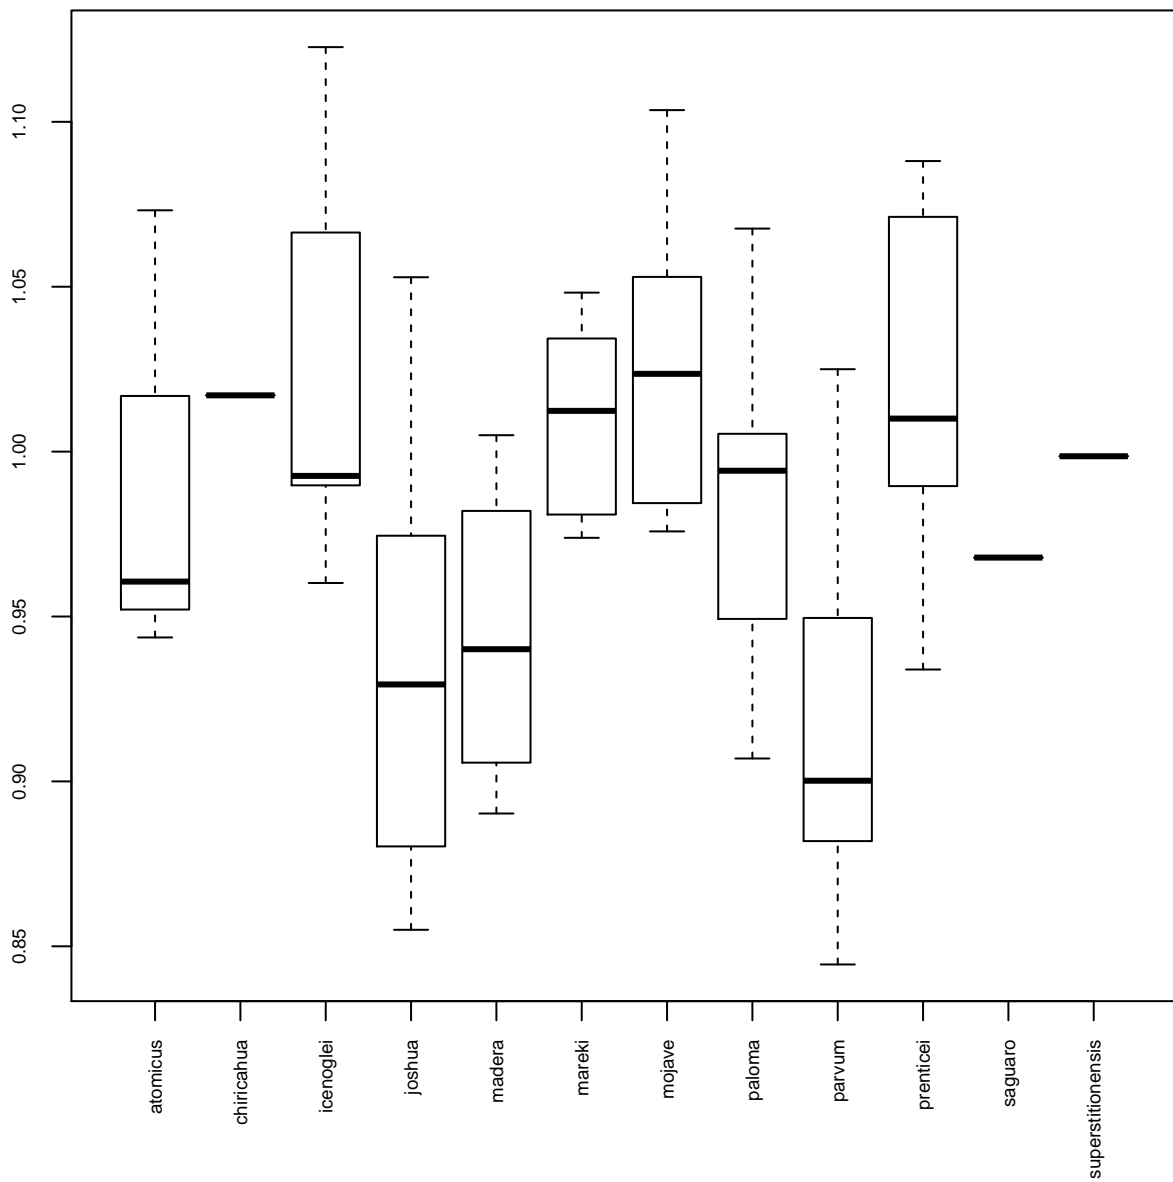

Supplement: Supplementary file 14

# Carapace Length – males

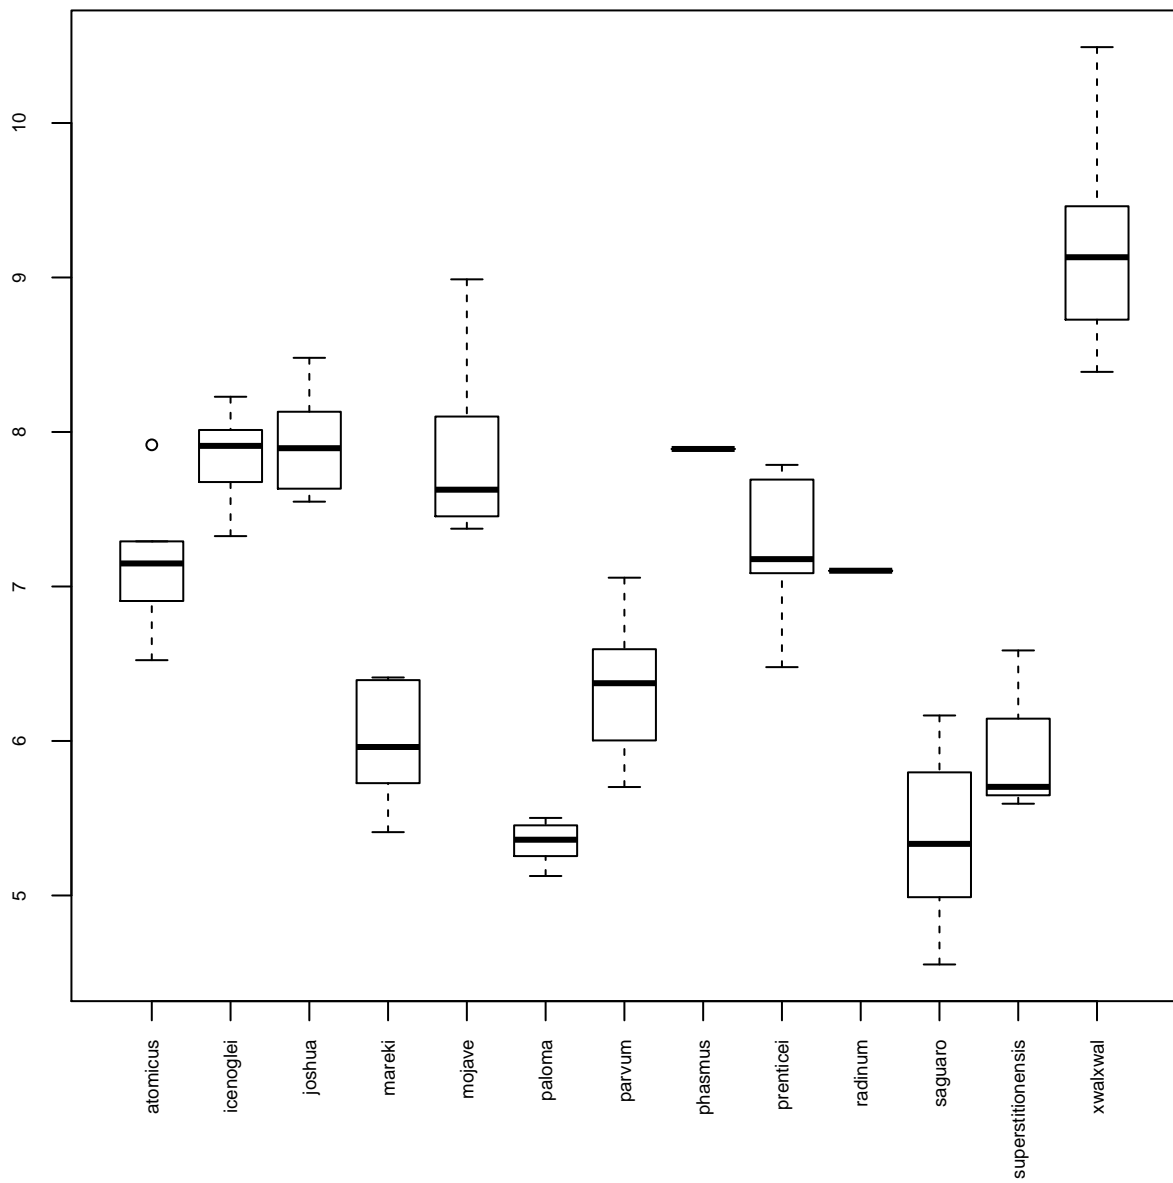

Supplement: Supplementary file 15

## Carapace Length/Tibia 4 ratio – males

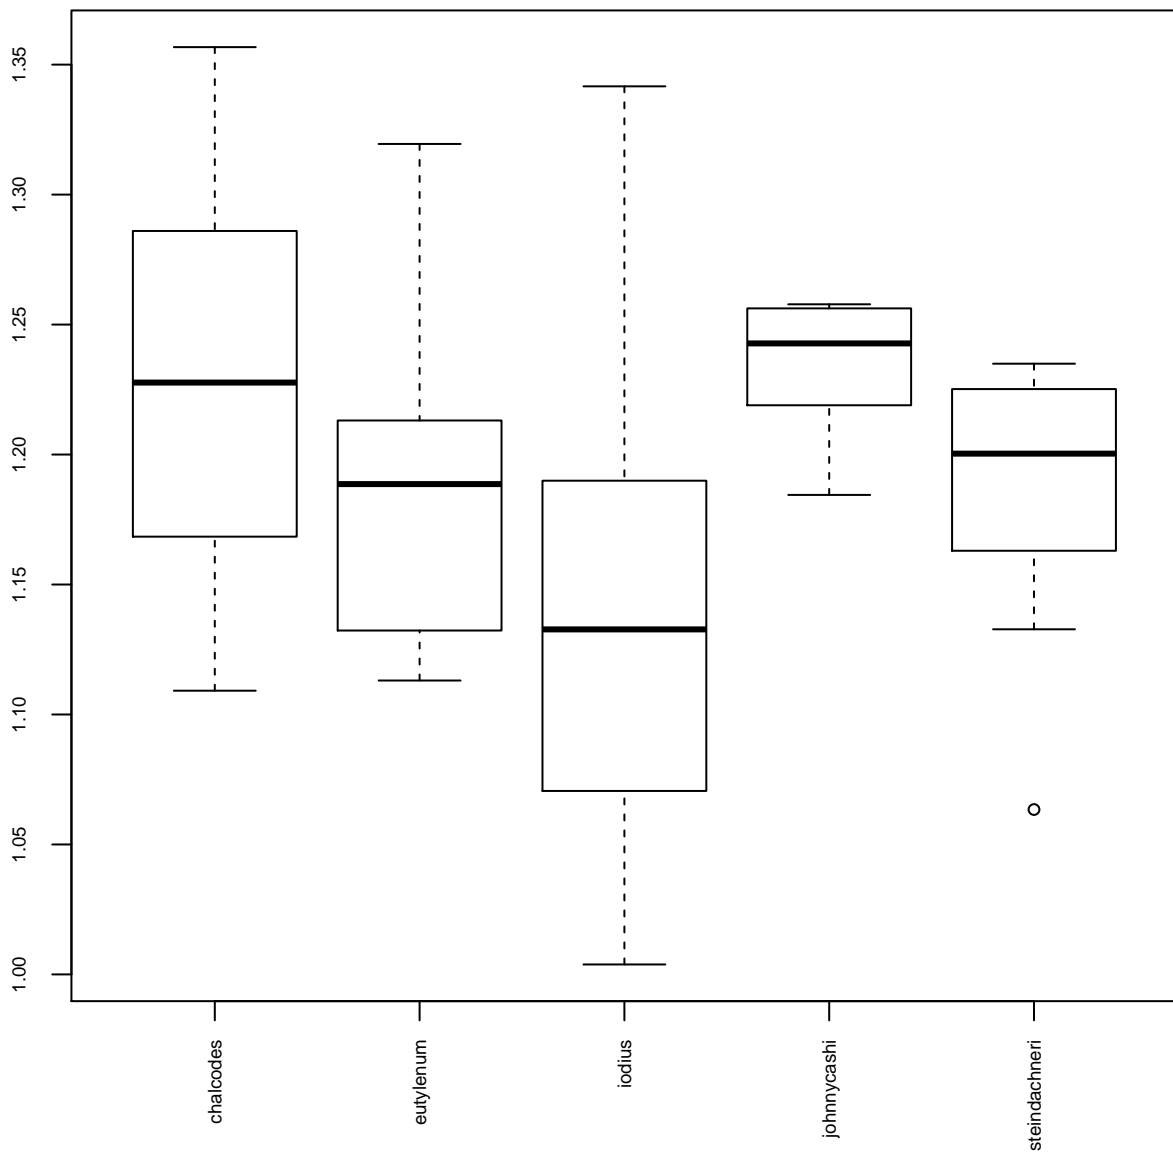

Supplement: Supplementary file 16

## Tibia 1/Femur 3 Length ratio – males

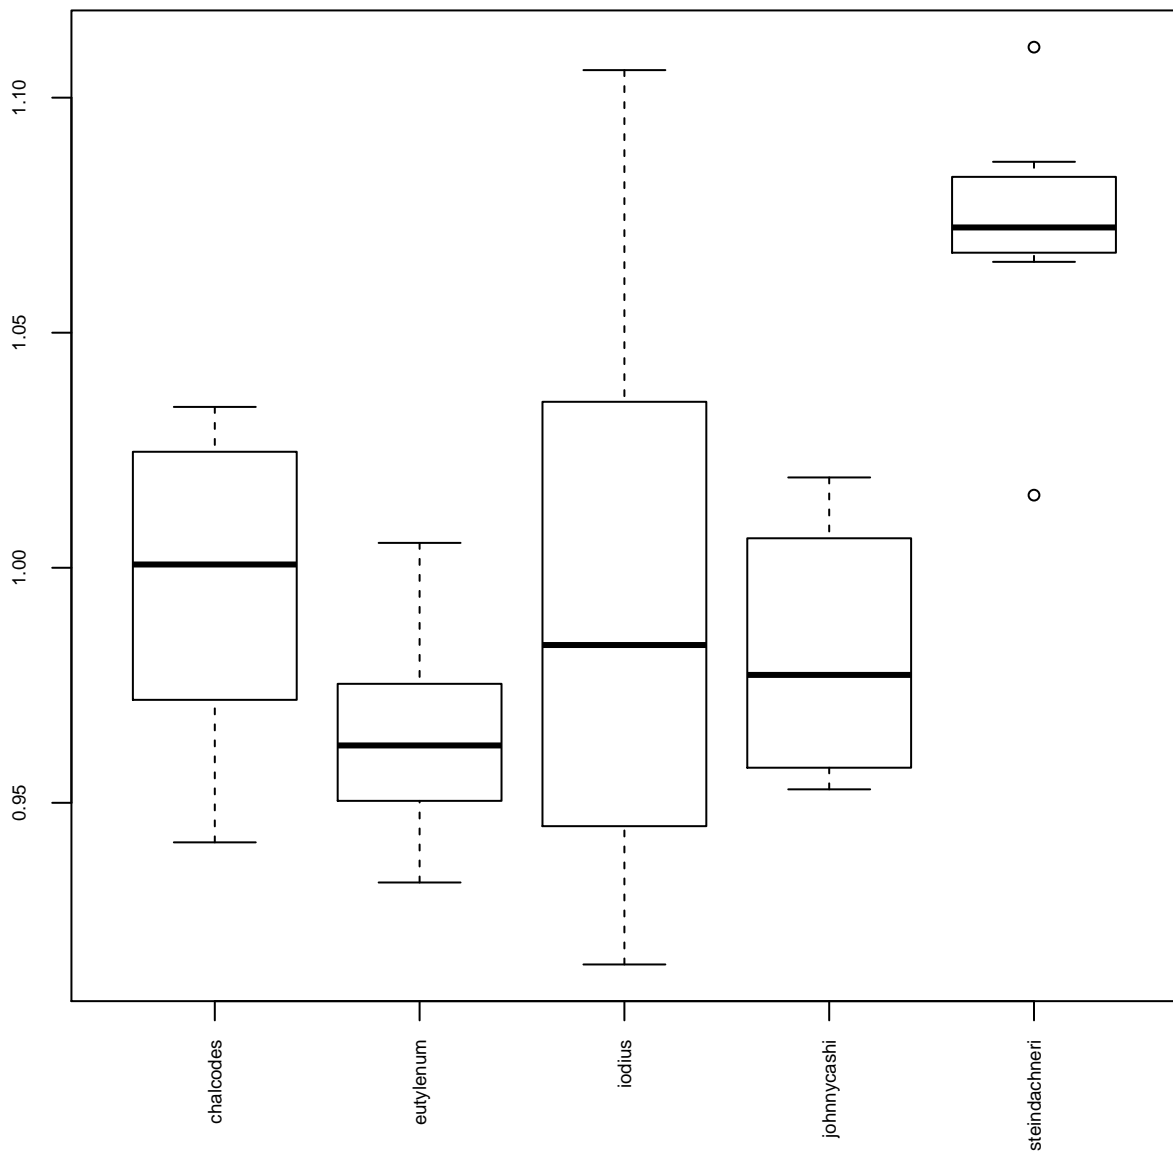

Supplement: Supplementary file 17

## Carapace Length/Patella 1 ratio – females

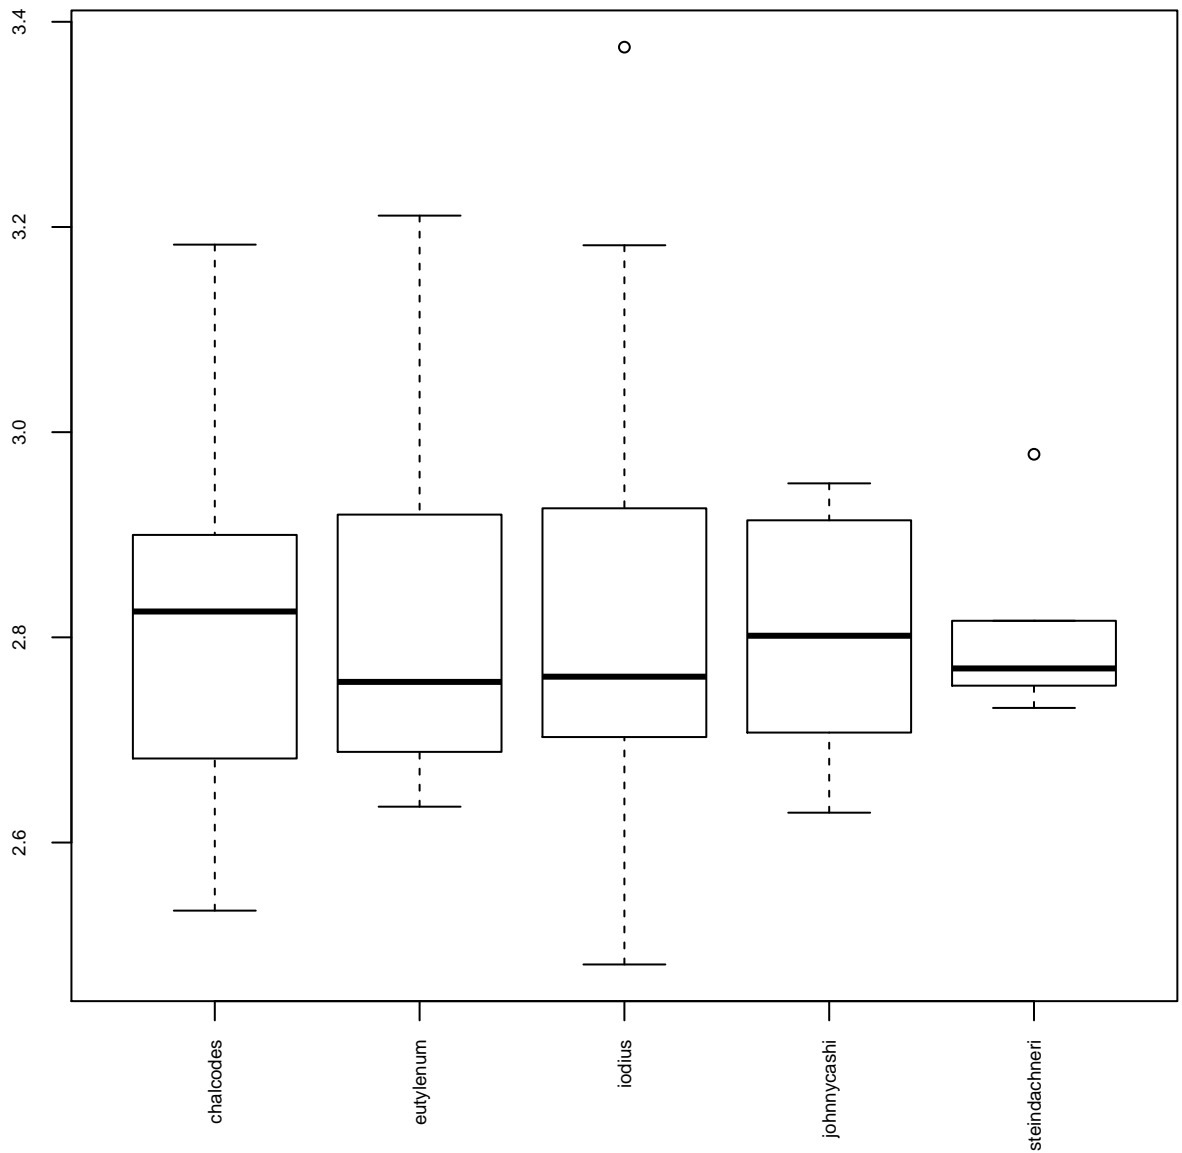

Supplement: Supplementary file 18

## Femur 1/Tibia 1 ratio – females

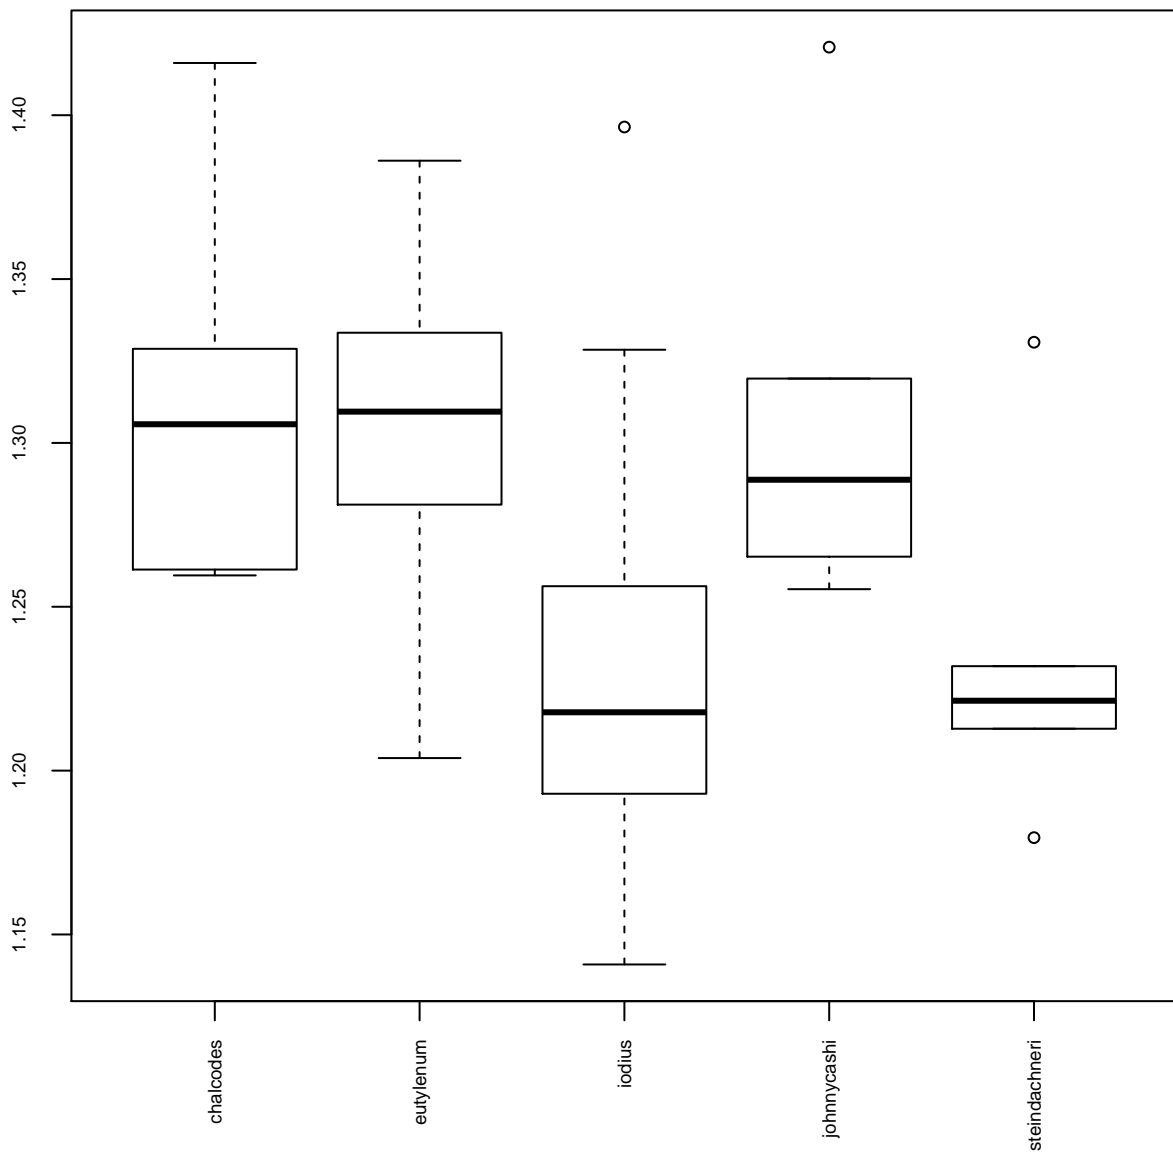

Supplement: Supplementary file 19

## Carapace Length/Femur 4 ratio – males

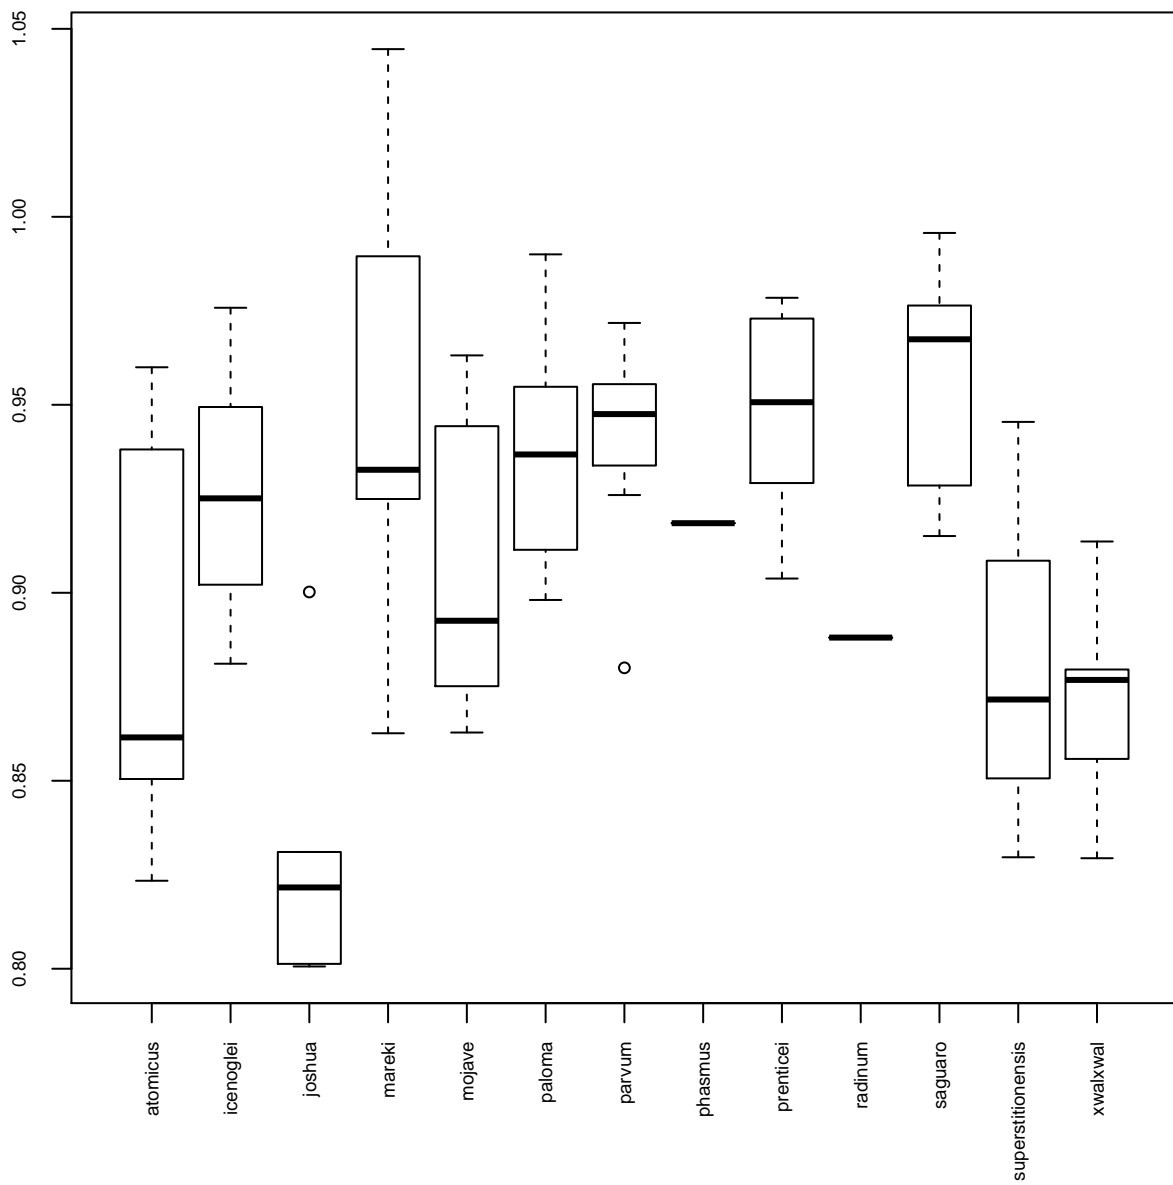

Supplement: Supplementary file 20

## Tibia 1/Metatarsus 1 ratio – males

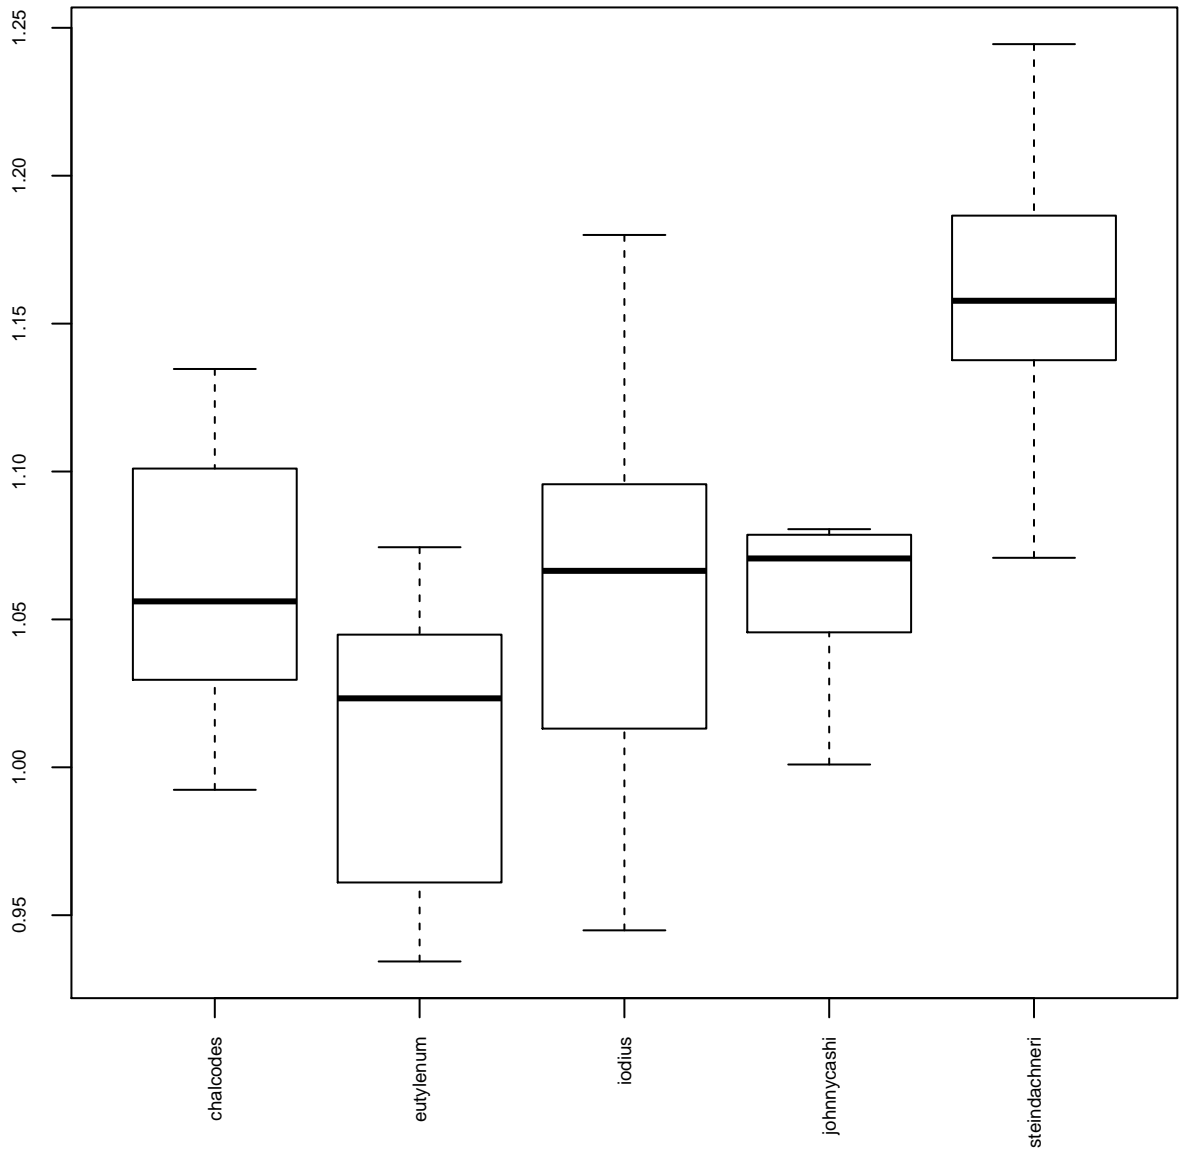

Supplement: Supplementary file 21

## Carapace Length/Patella 4 ratio – females

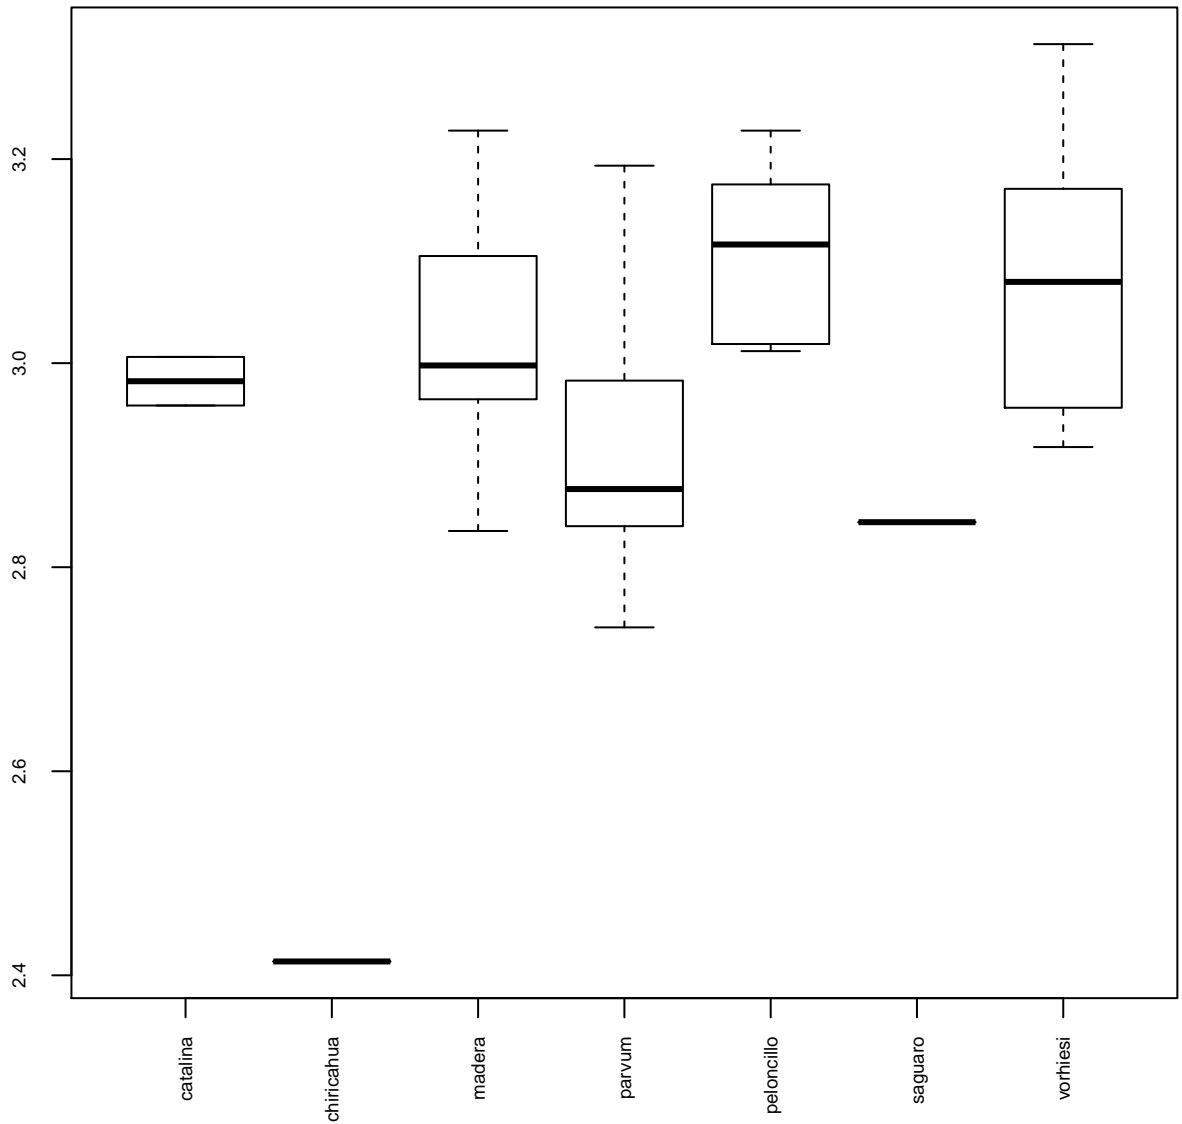

Supplement: Supplementary file 22

## Femur 1/Tarsus 1 ratio – males

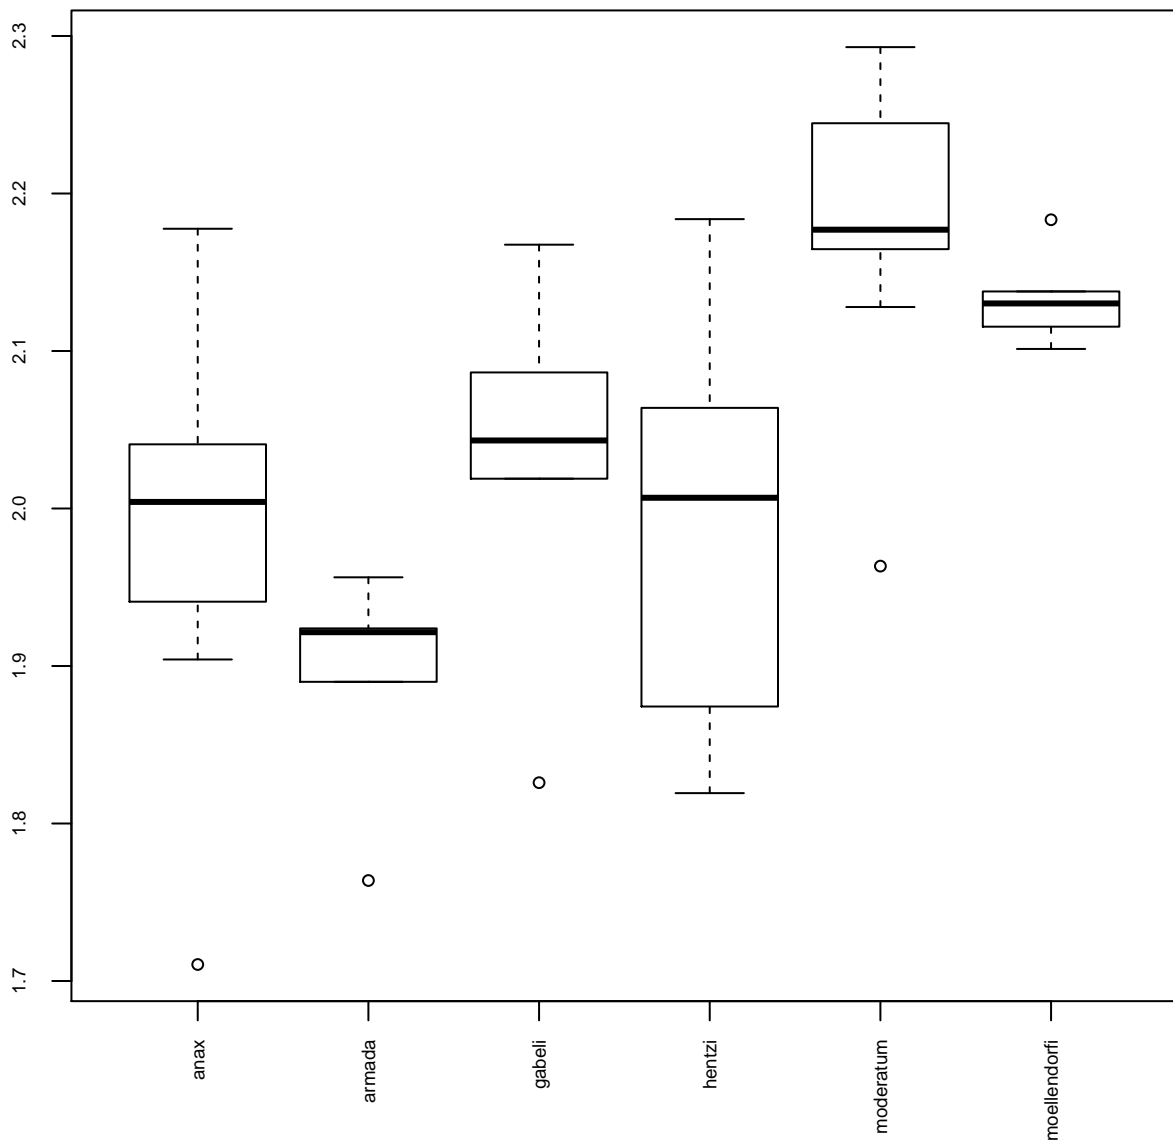

Supplement: Supplementary file 23

# Tibia 3/Tarsus 3 ratio – males

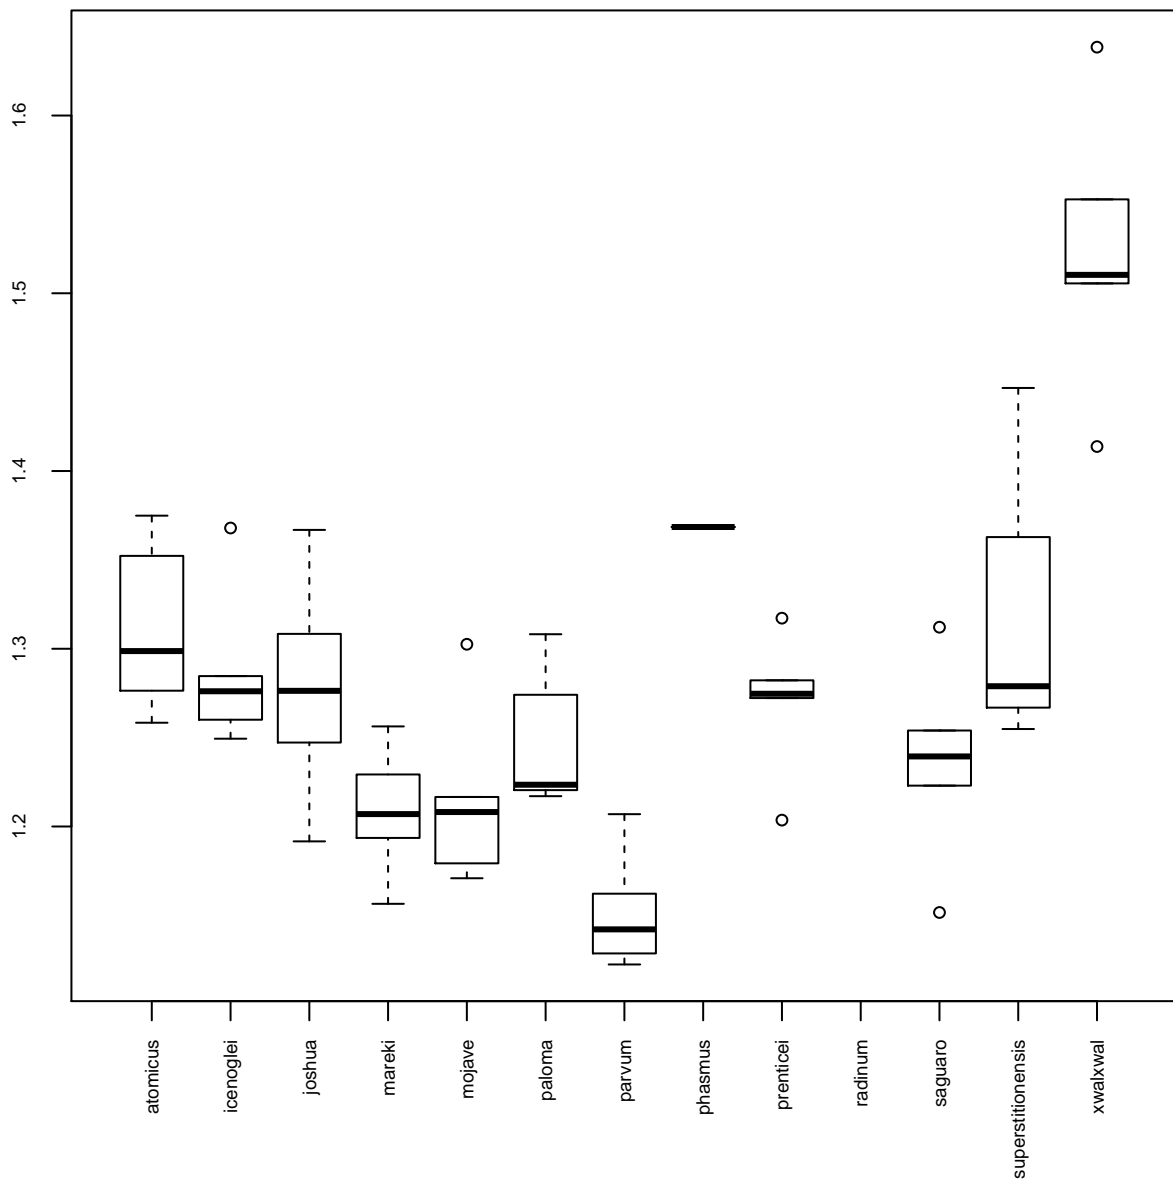

Supplement: Supplementary file 24

### Patella 3/Femur 4 Length ratio – males

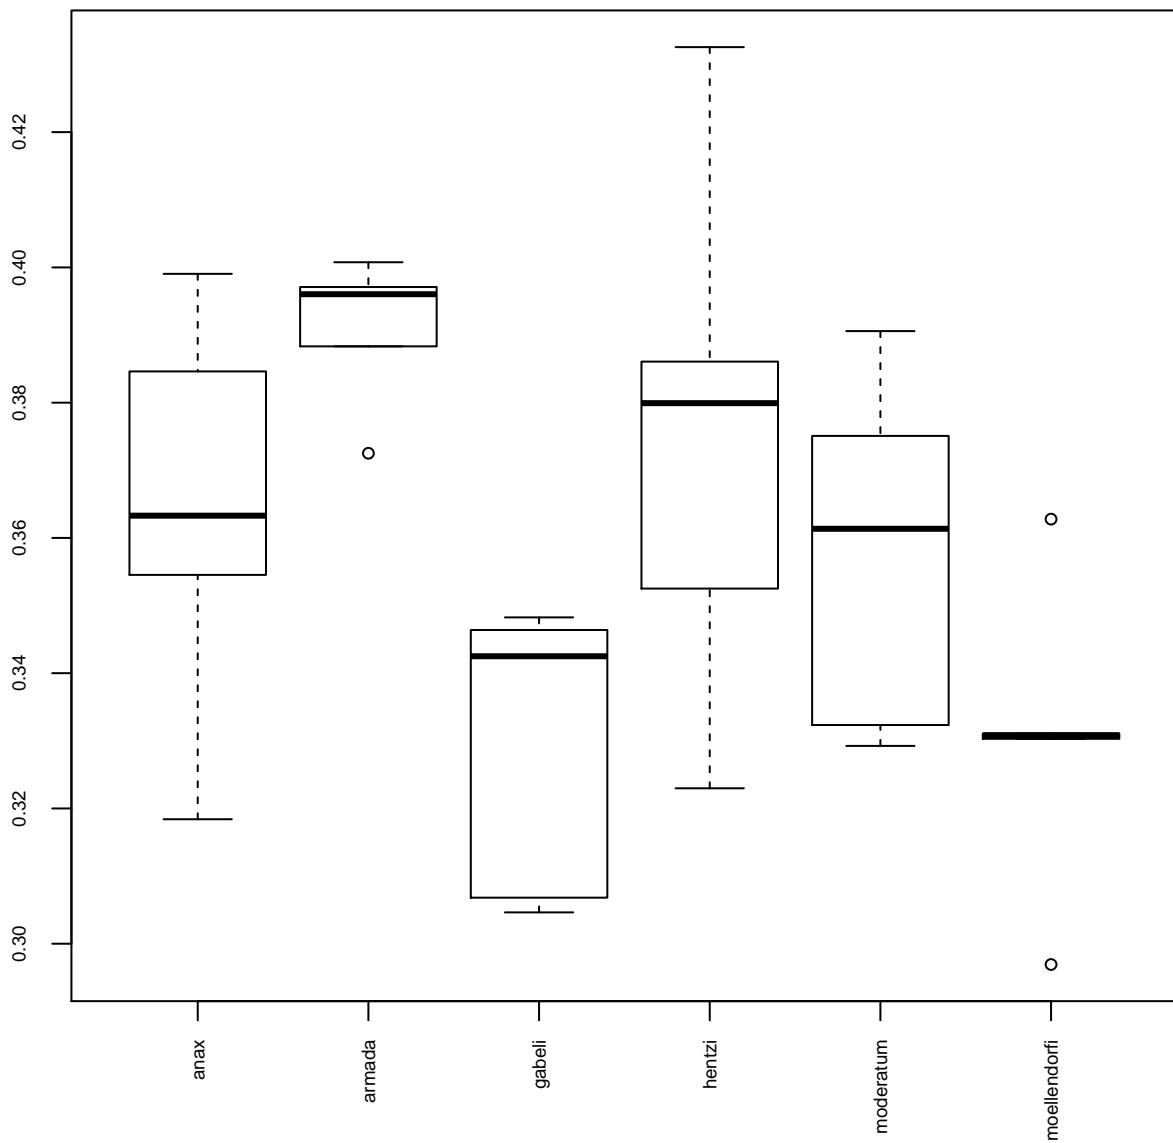

Supplement: Supplementary file 25

# Metatarsus 1/Femur 3 Length ratio – females

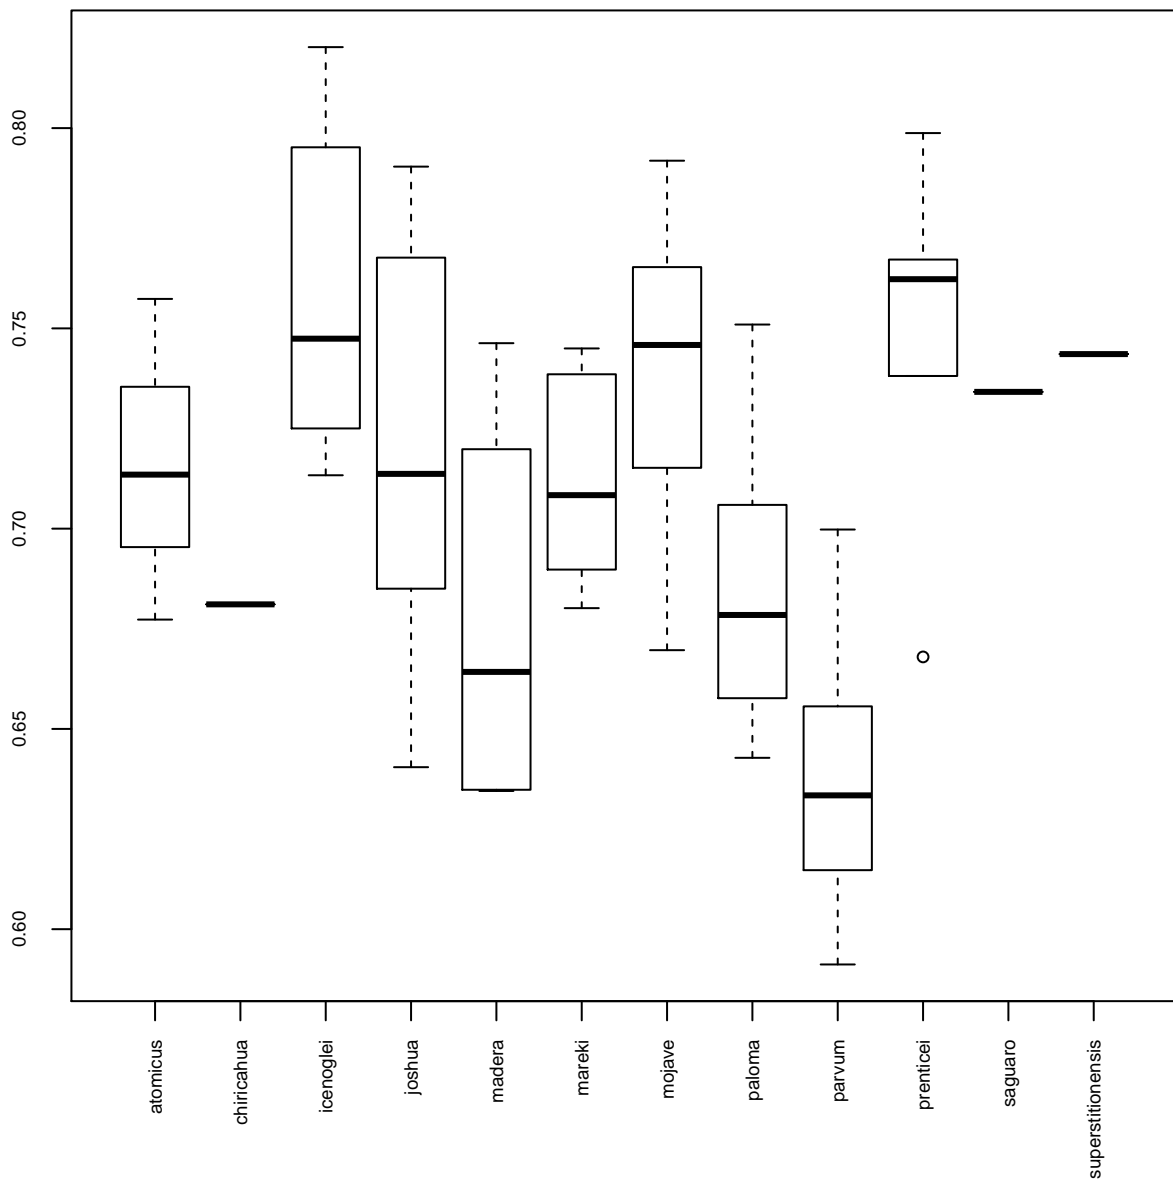

Supplement: Supplementary file 26

## Tibia 3/Tarsus 3 ratio – females

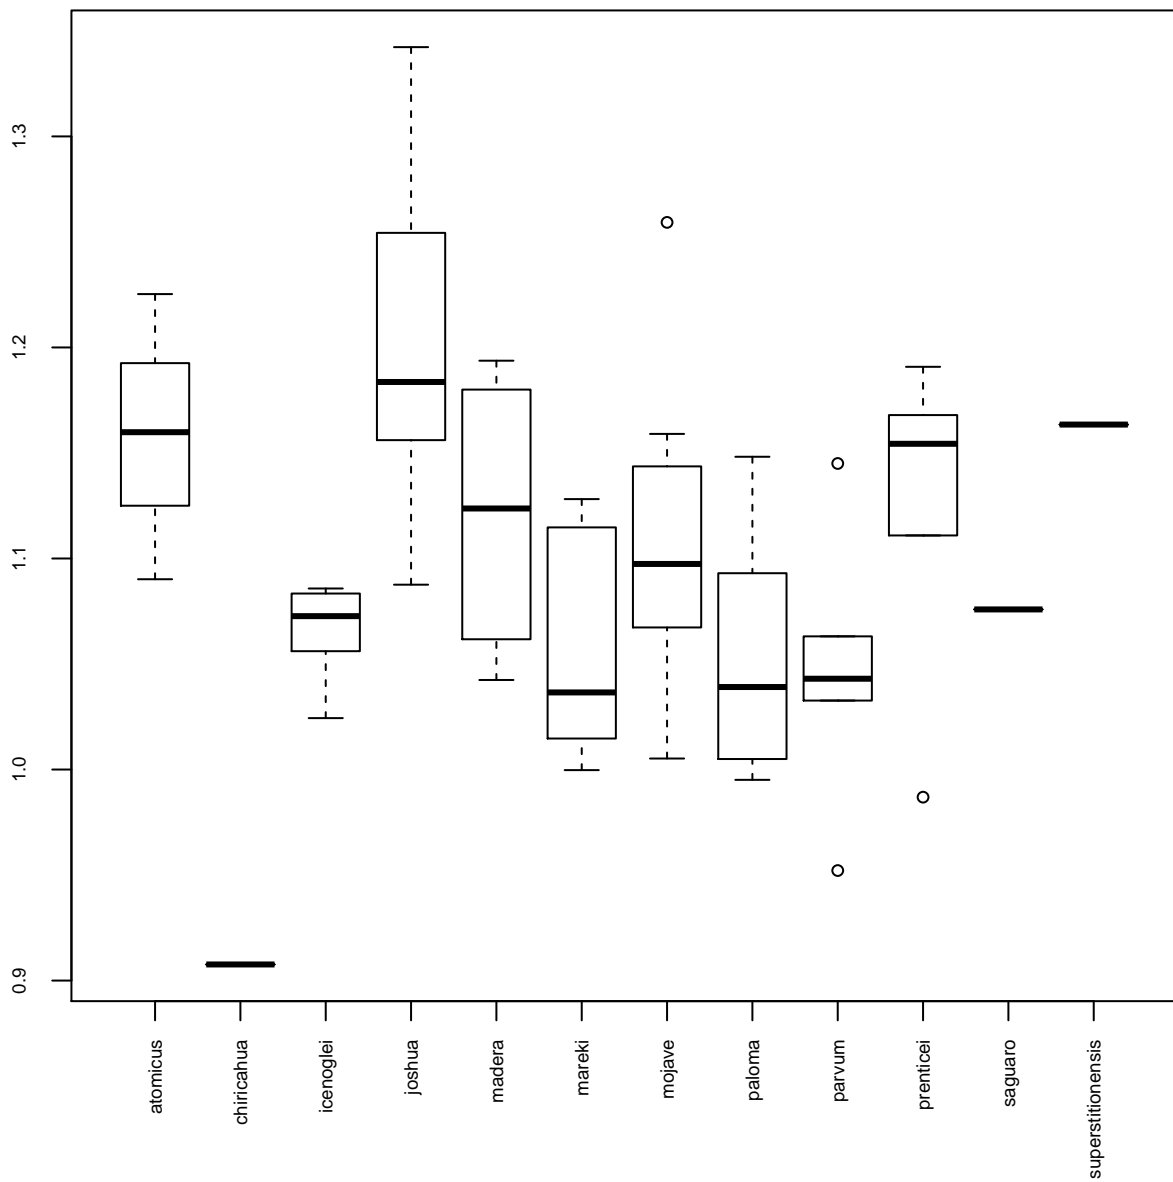

Supplement: Supplementary file 27

## Tibia 1/Patella 4 Length ratio – males

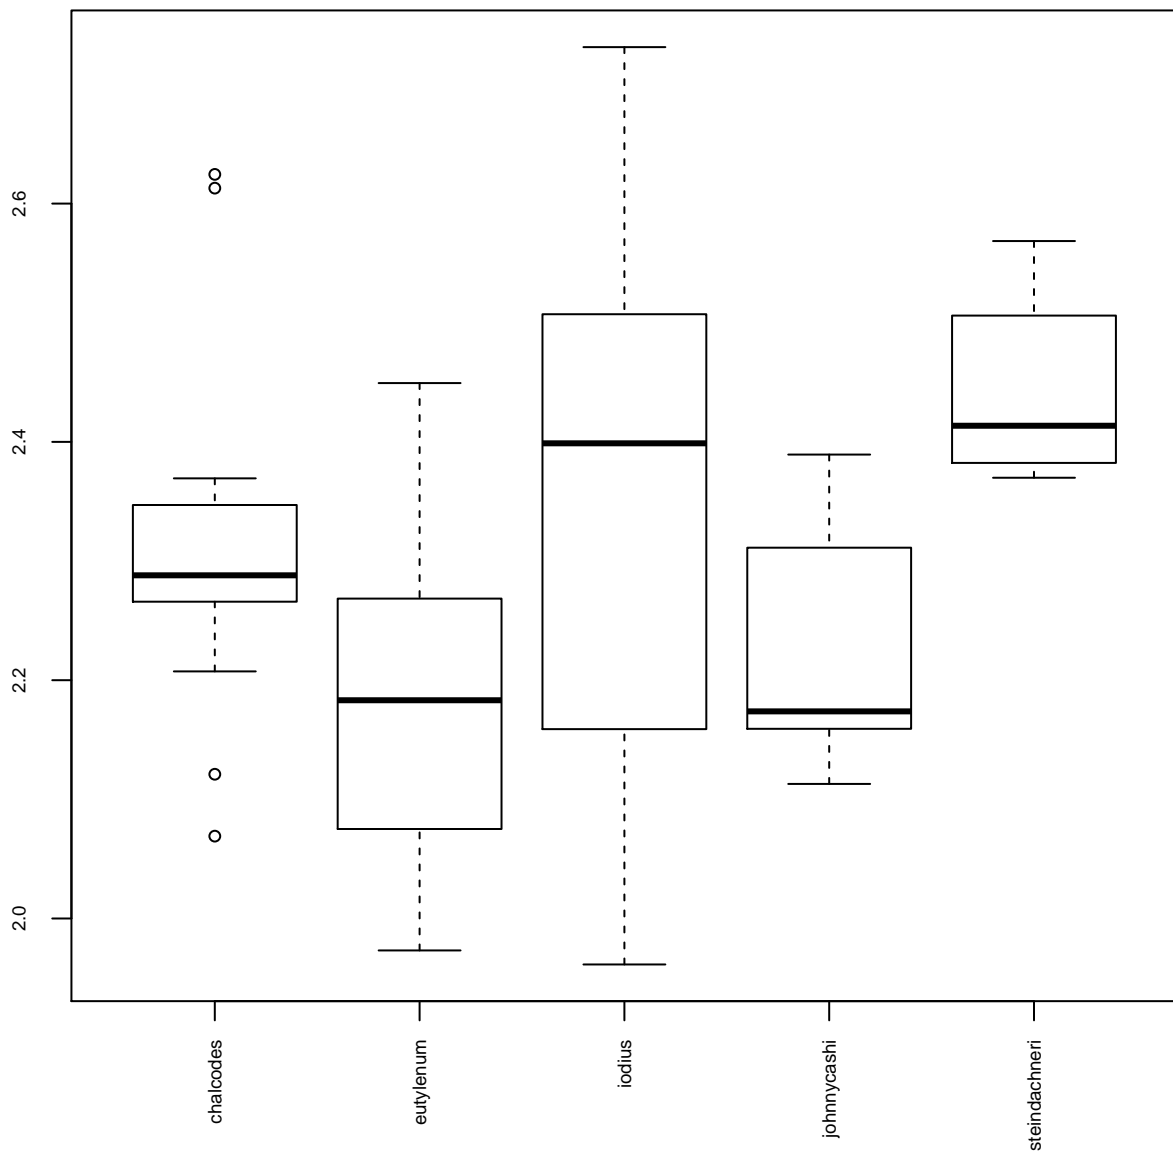

Supplement: Supplementary file 28

# Patella 1/Tibia 1 ratio – females

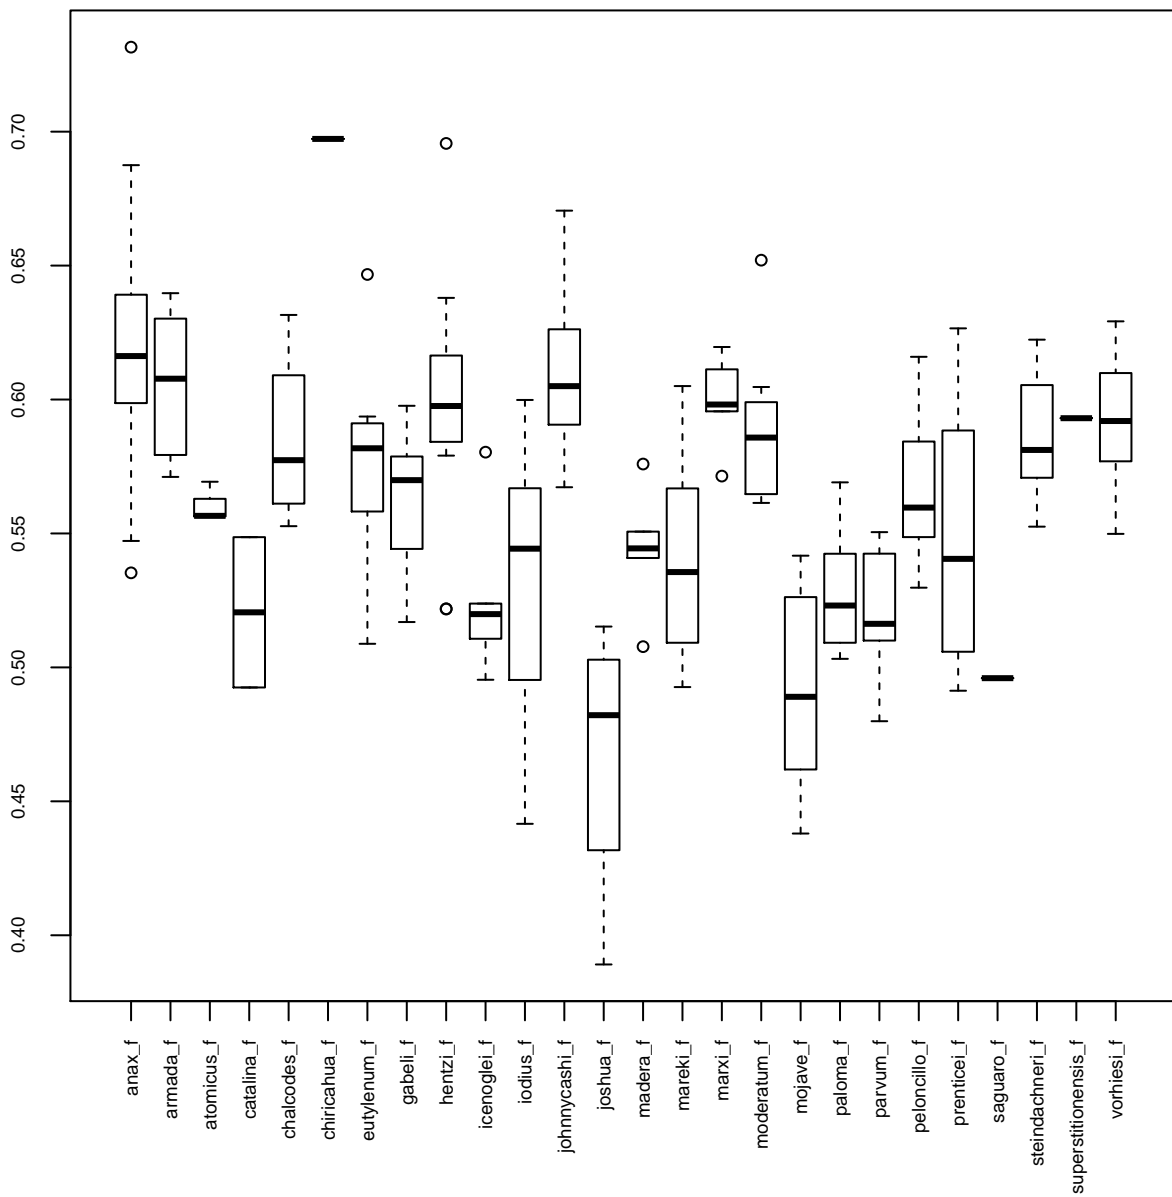

Supplement: Supplementary file 29

## Carapace Length/Tarsus 1 ratio – males

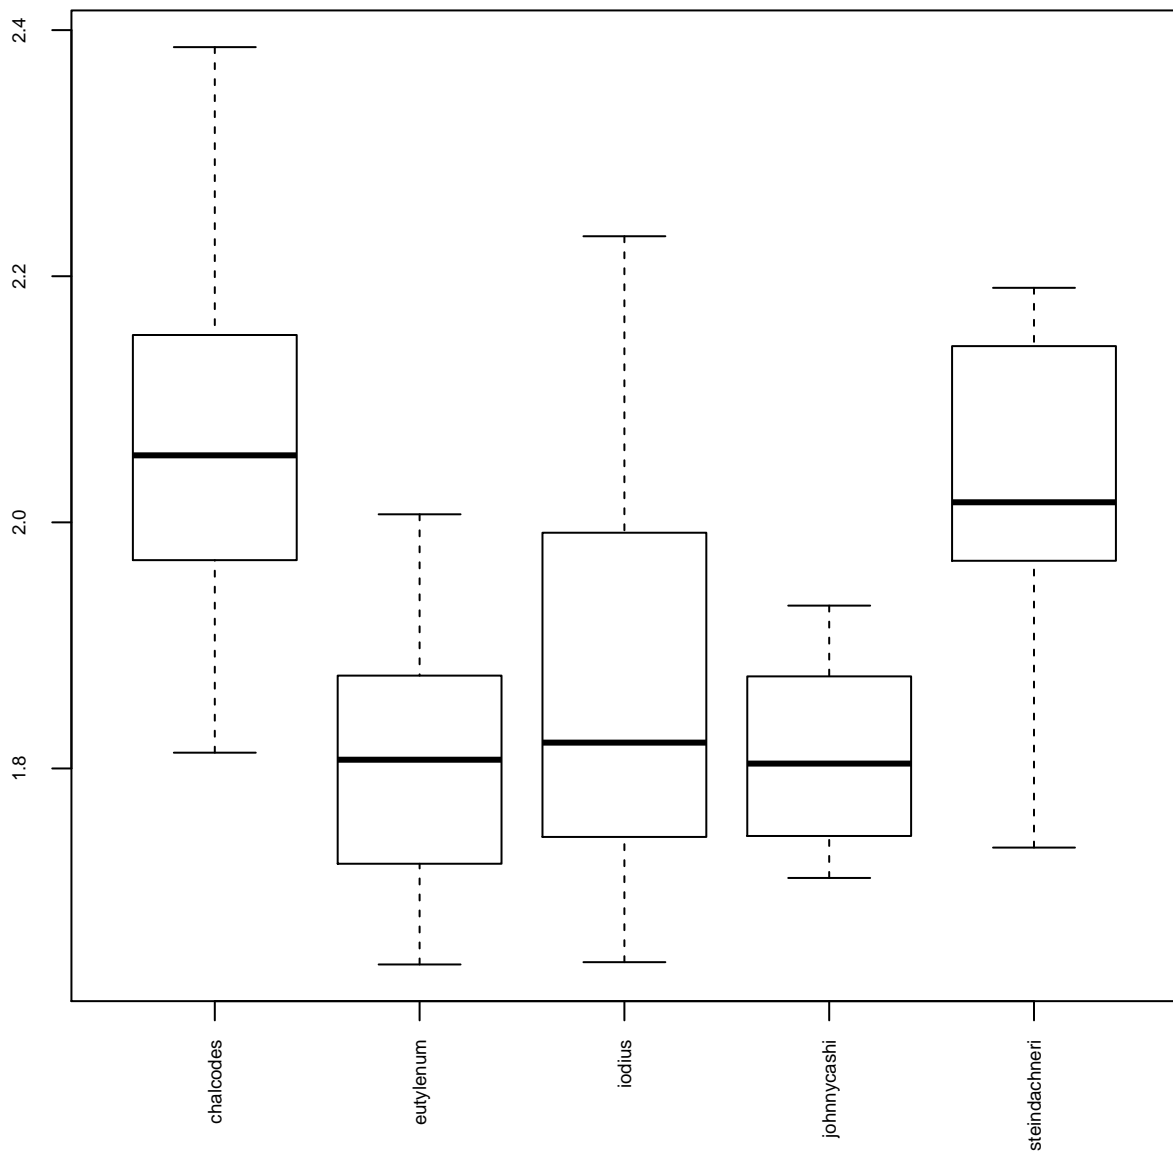

Supplement: Supplementary file 30

## Metatarsus 3/Tibia 4 Length ratio – females

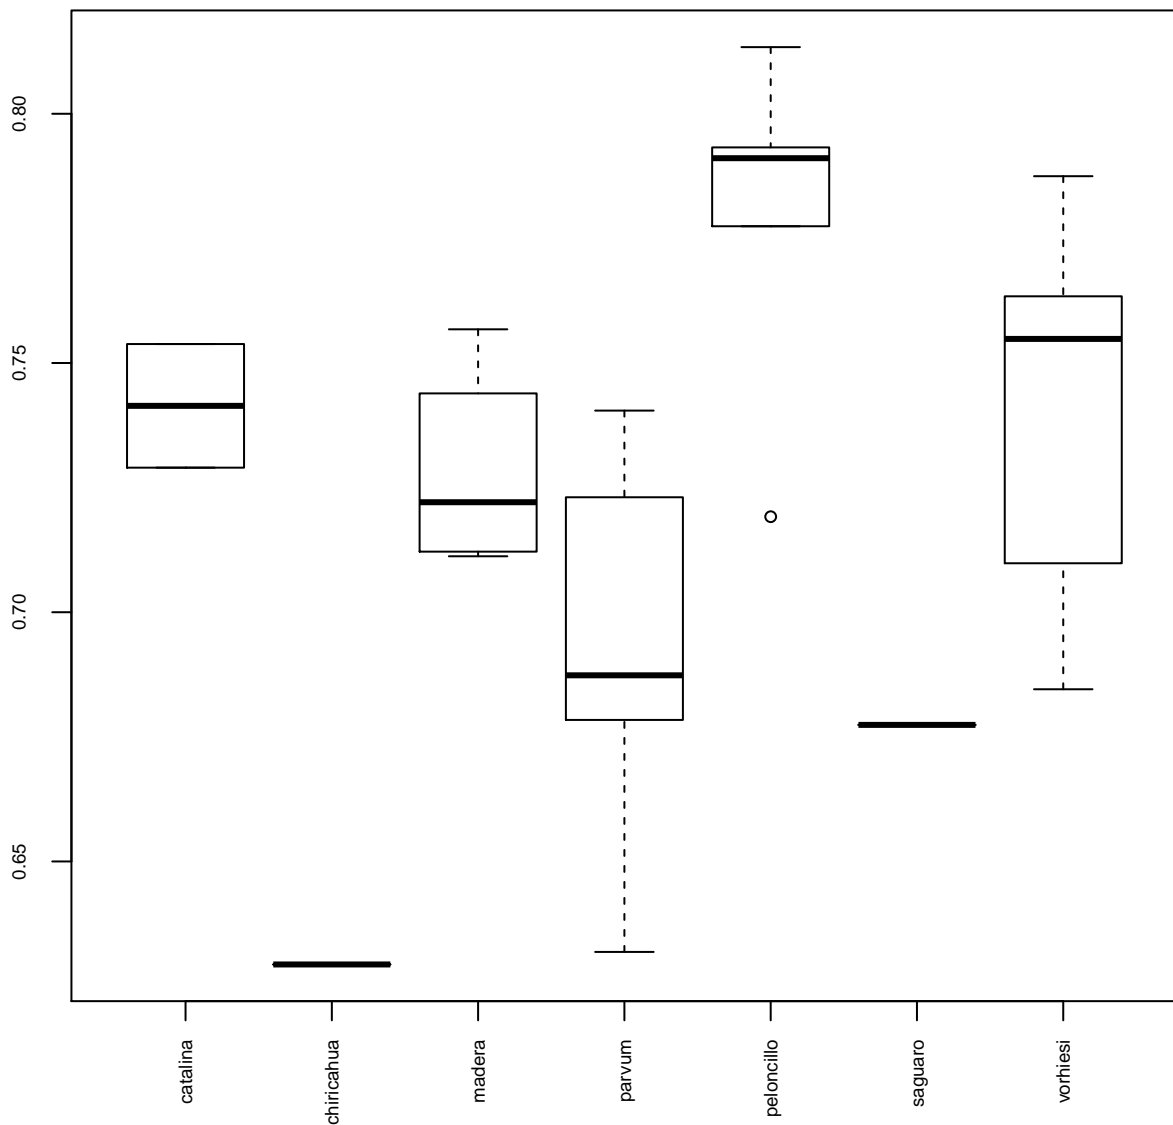

Supplement: Supplementary file 31

## Metatarsus 3/Patella 4 Length ratio – males

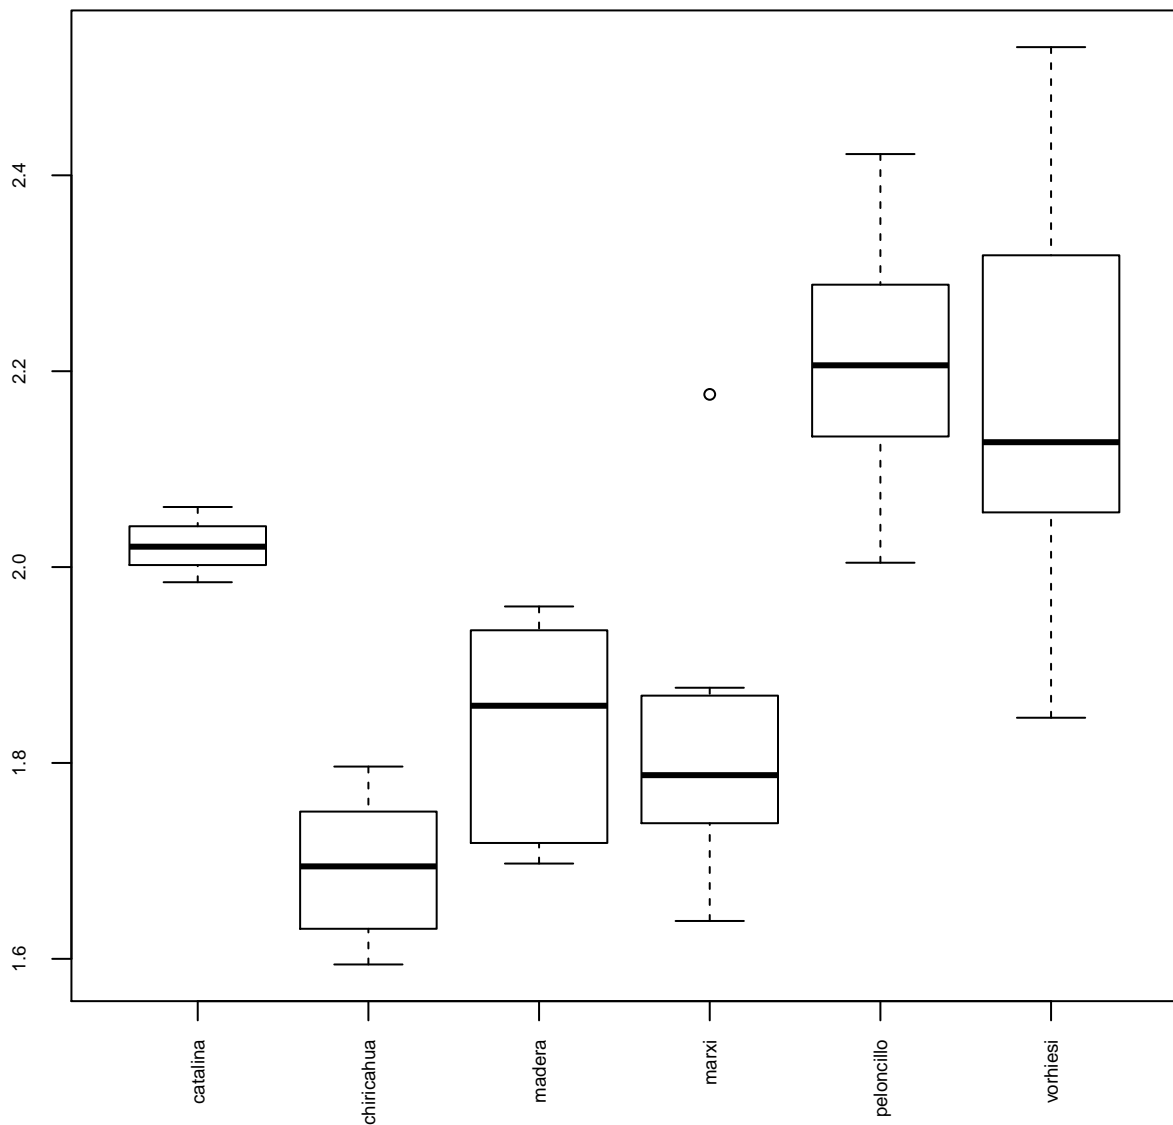

Supplement: Supplementary file 32

## Metatarsus 3/Tarsus 3 ratio – males

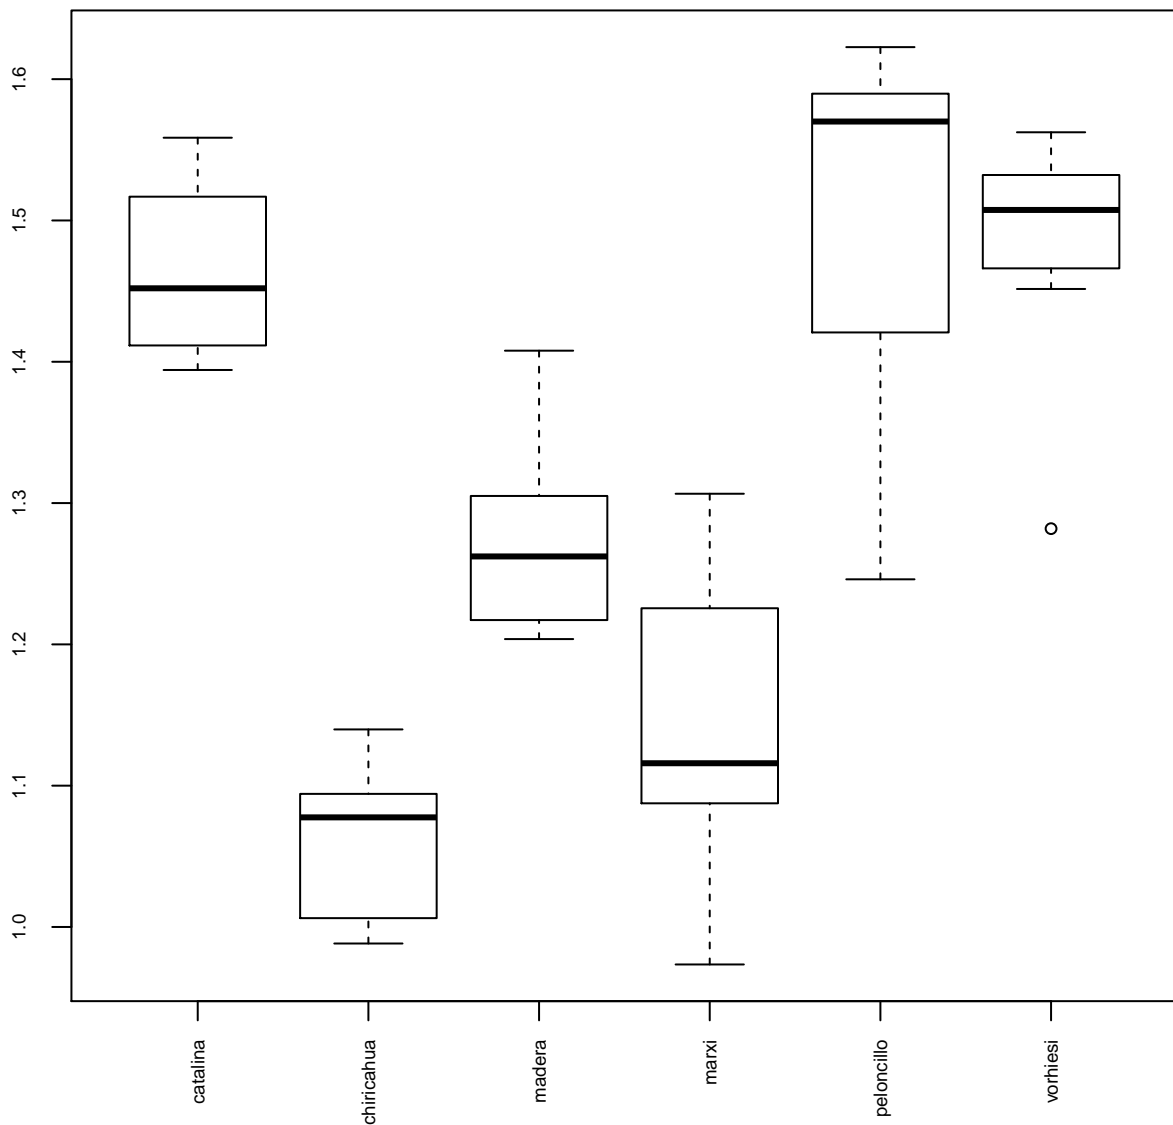

Supplement: Supplementary file 33

## Tarsus 1/Patella 3 Length ratio – females

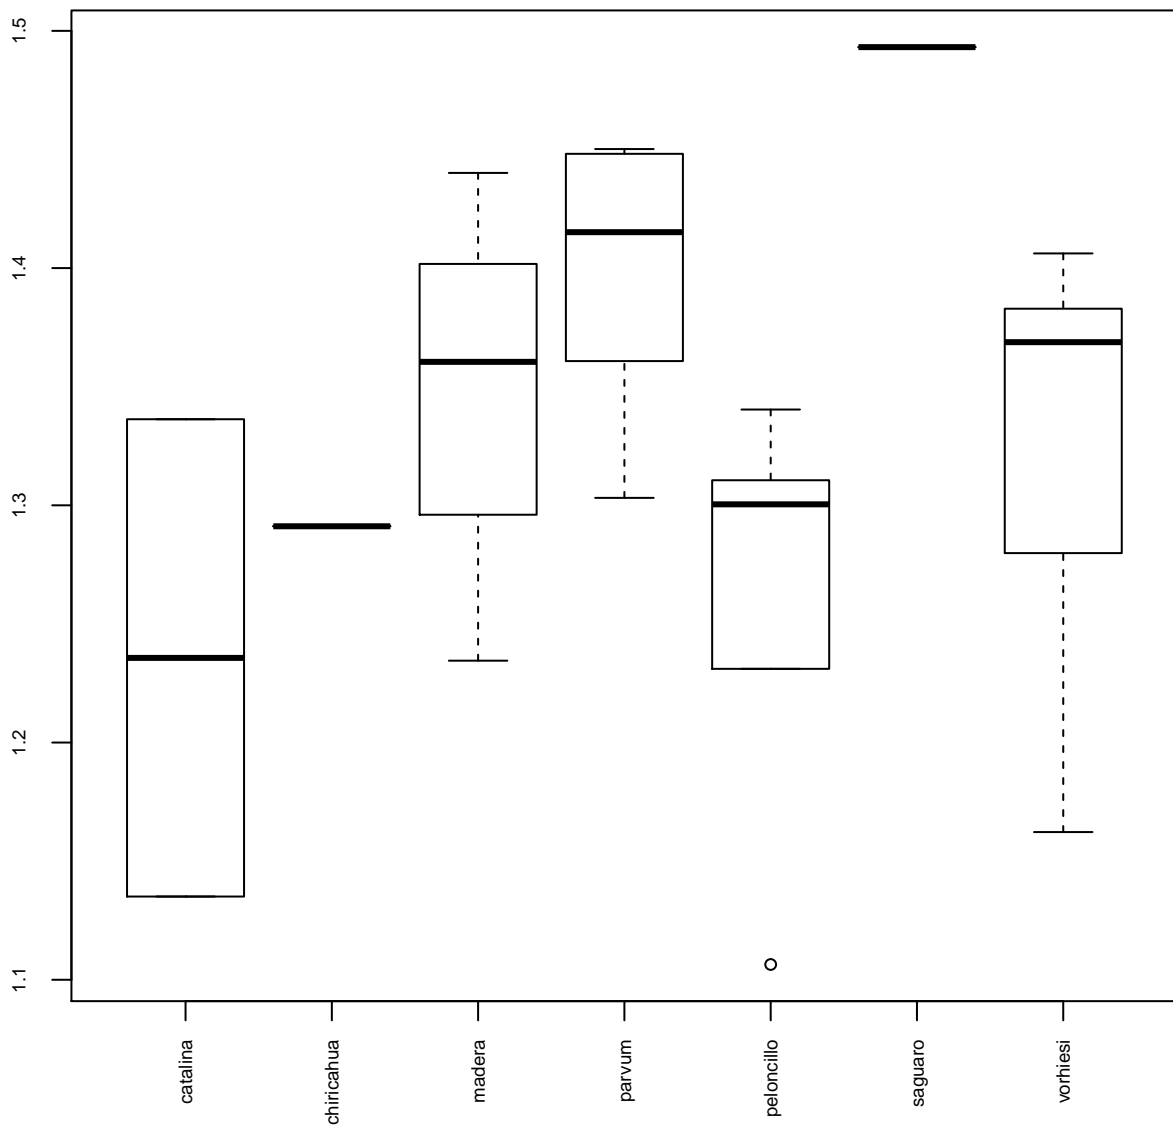

Supplement: Supplementary file 34

## Carapace Length – males

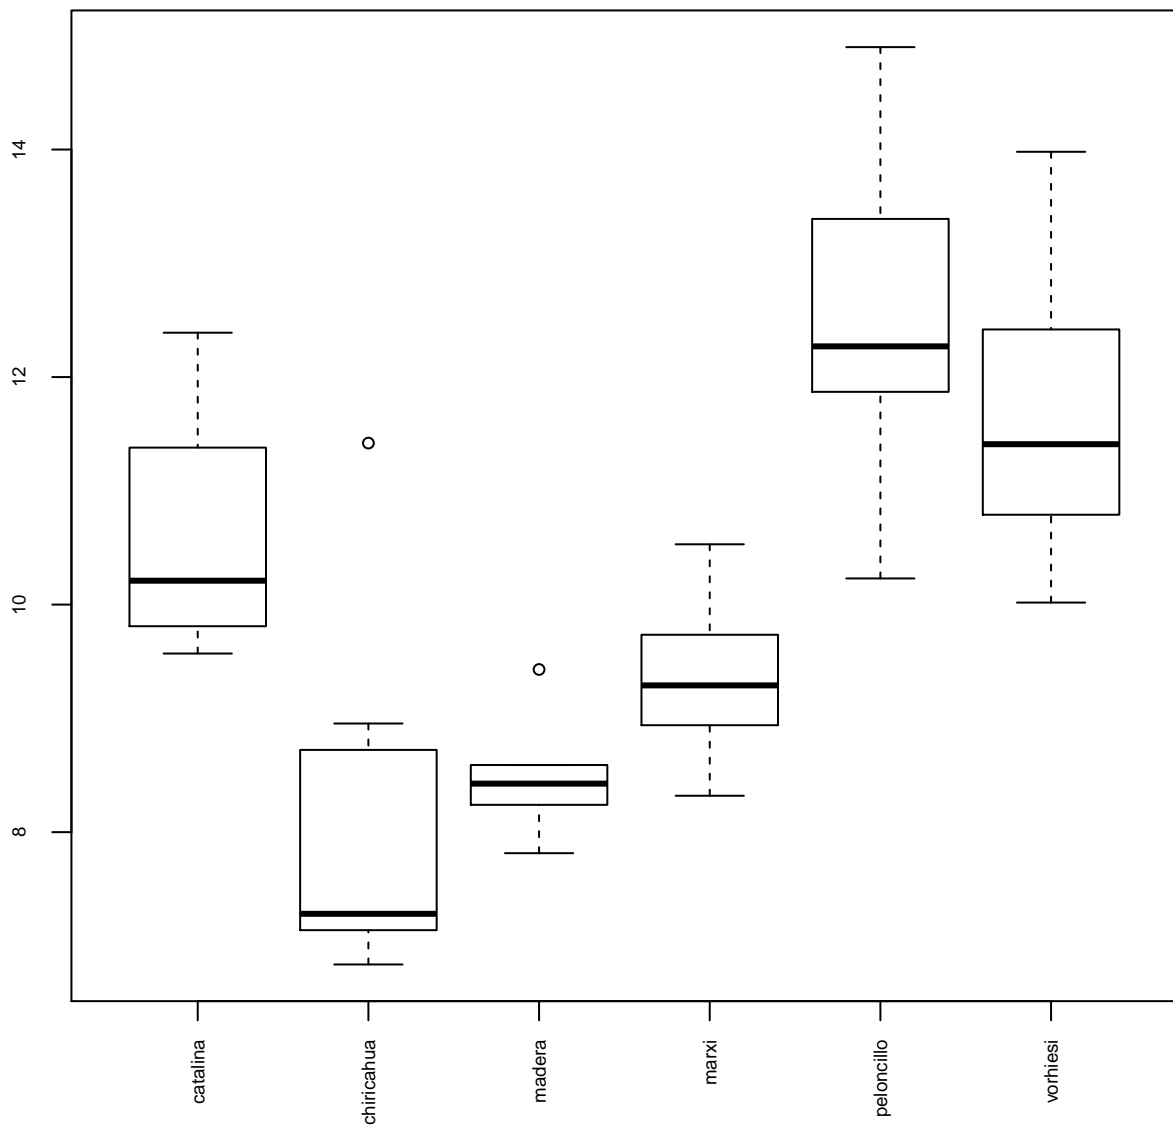

Supplement: Supplementary file 35

# Patella 3/Femur 4 Length ratio – males

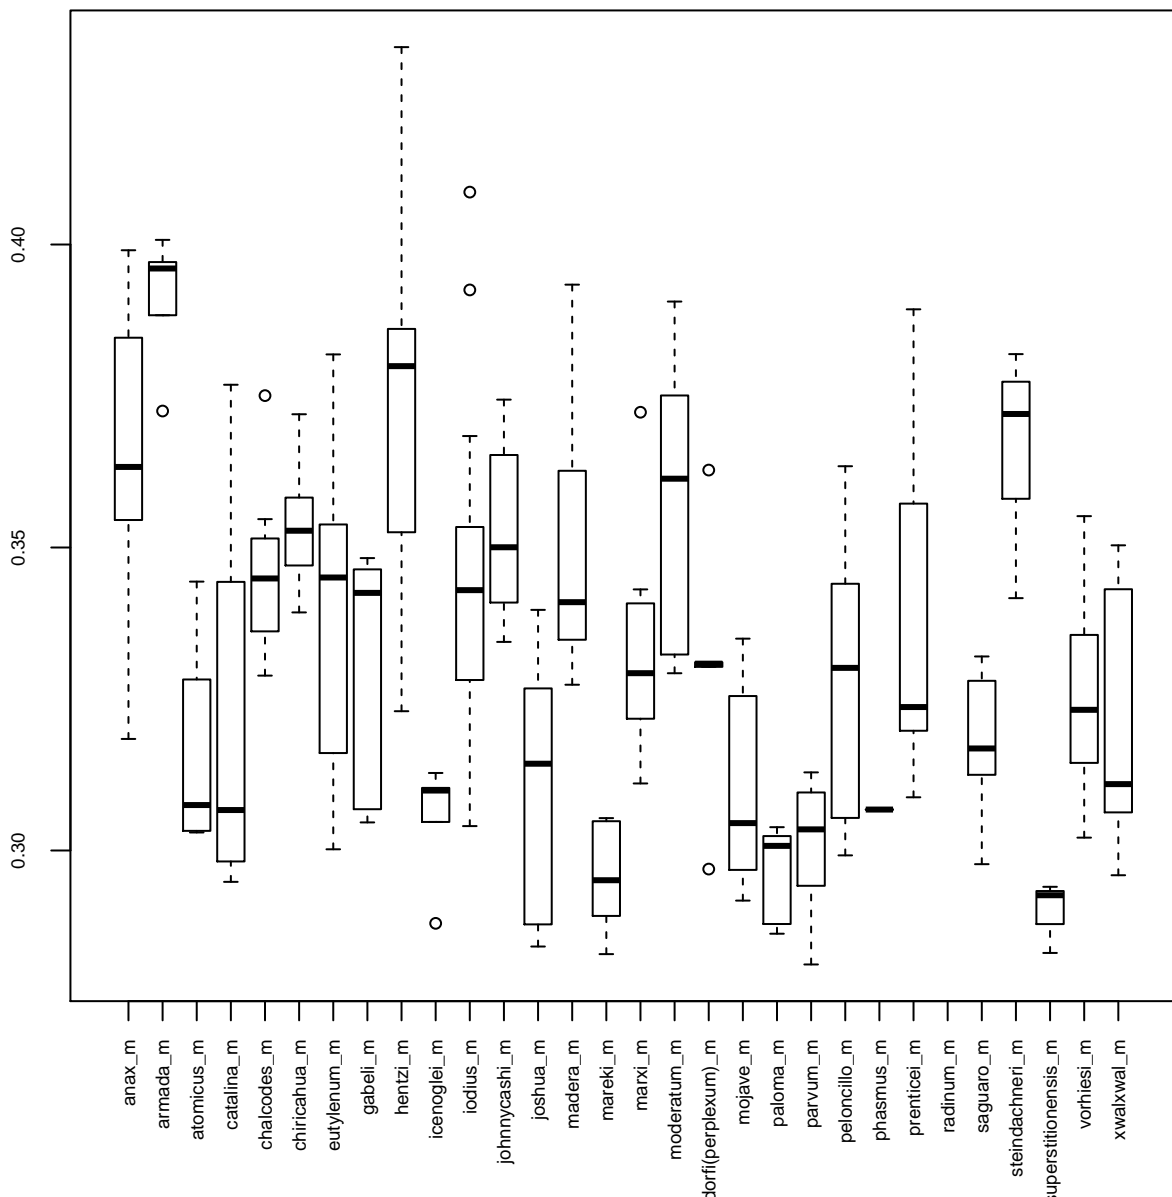

Supplement: Supplementary file 36

# Patella 1/Metatarsus 4 Length ratio – males

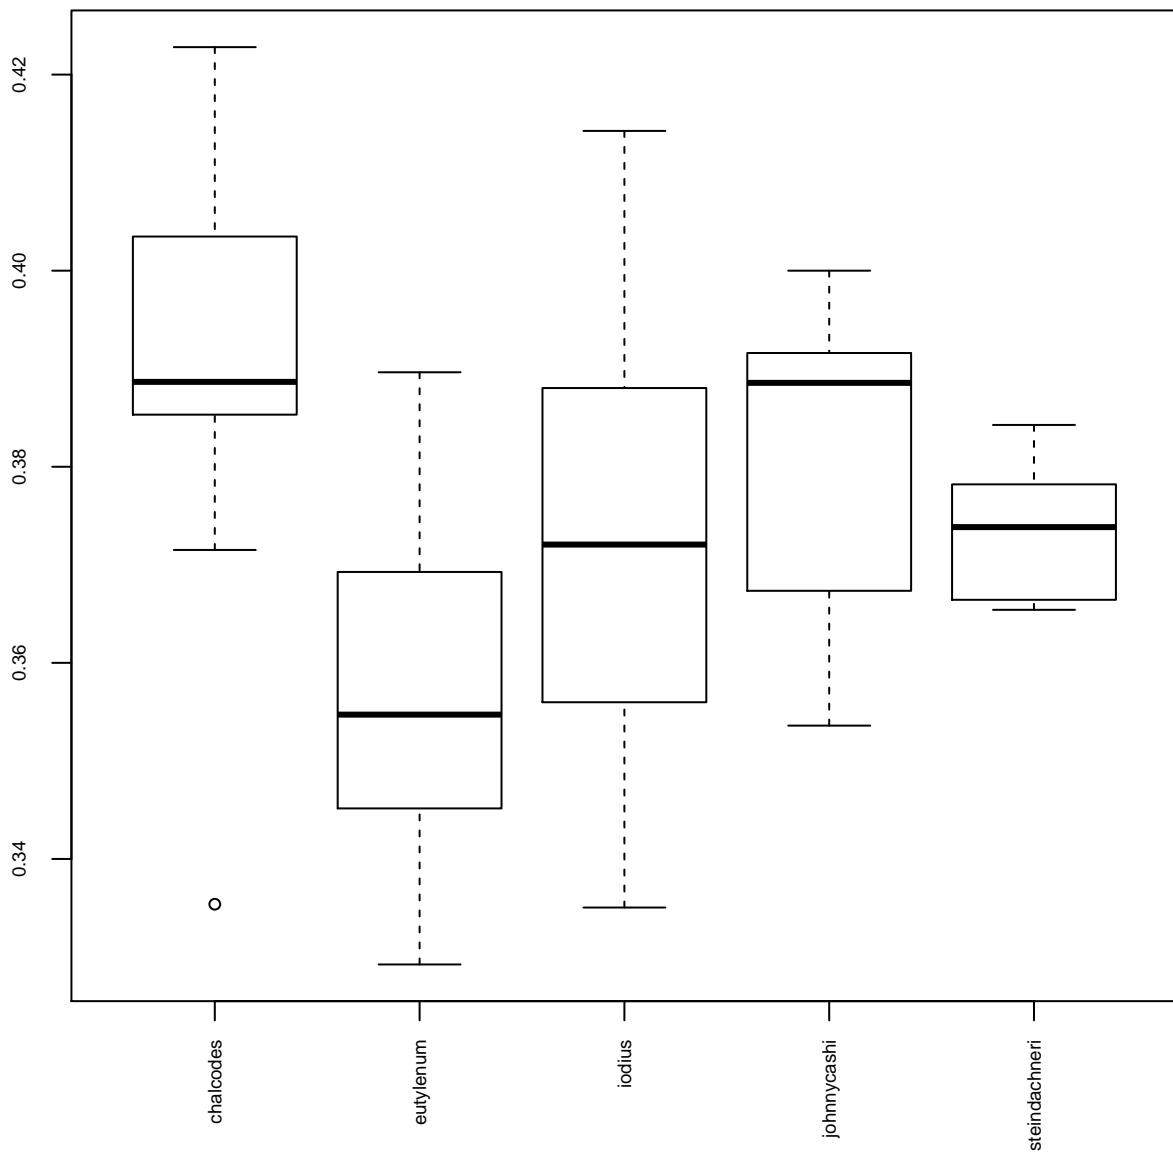

Supplement: Supplementary file 37

## Femur 1/Metatarsus 3 ratio – males

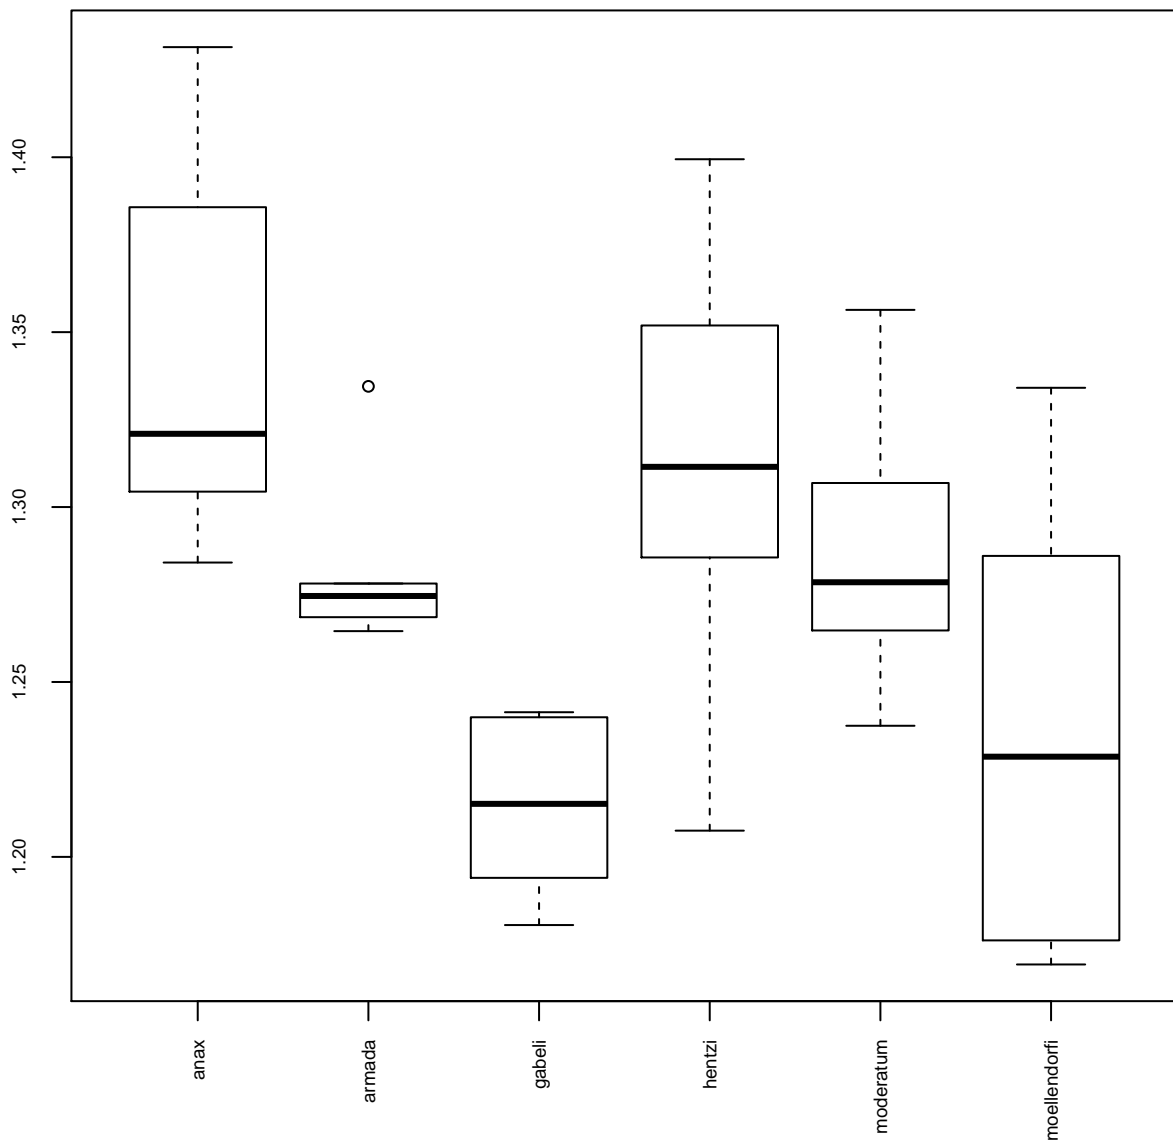

Supplement: Supplementary file 38

## Carapace Length/Patella 1 ratio – females

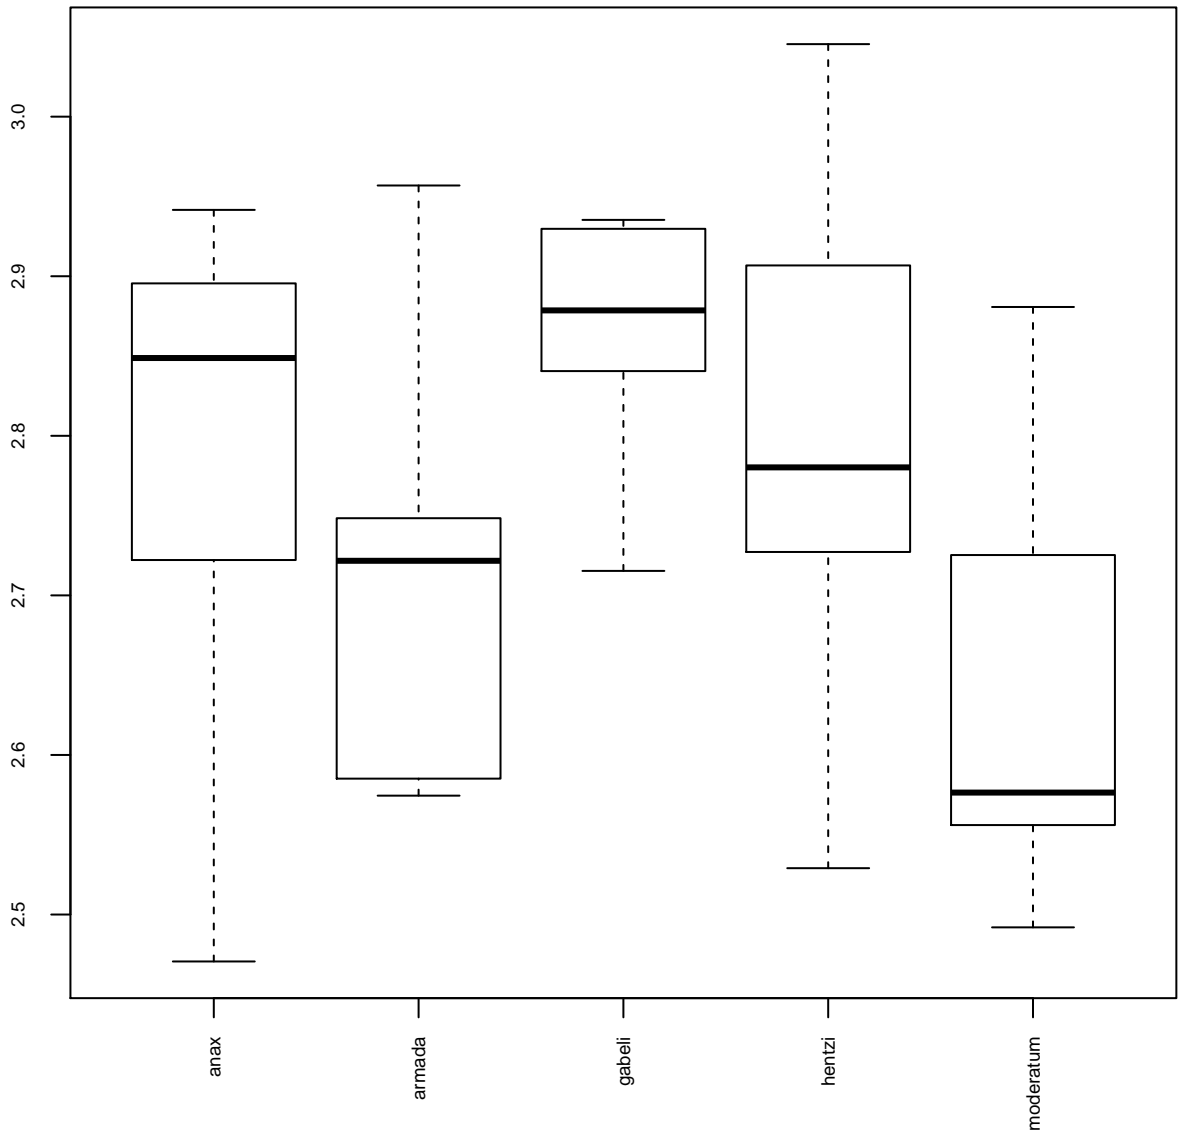

Supplement: Supplementary file 39

## Tibia 3/Tarsus 3 ratio – males

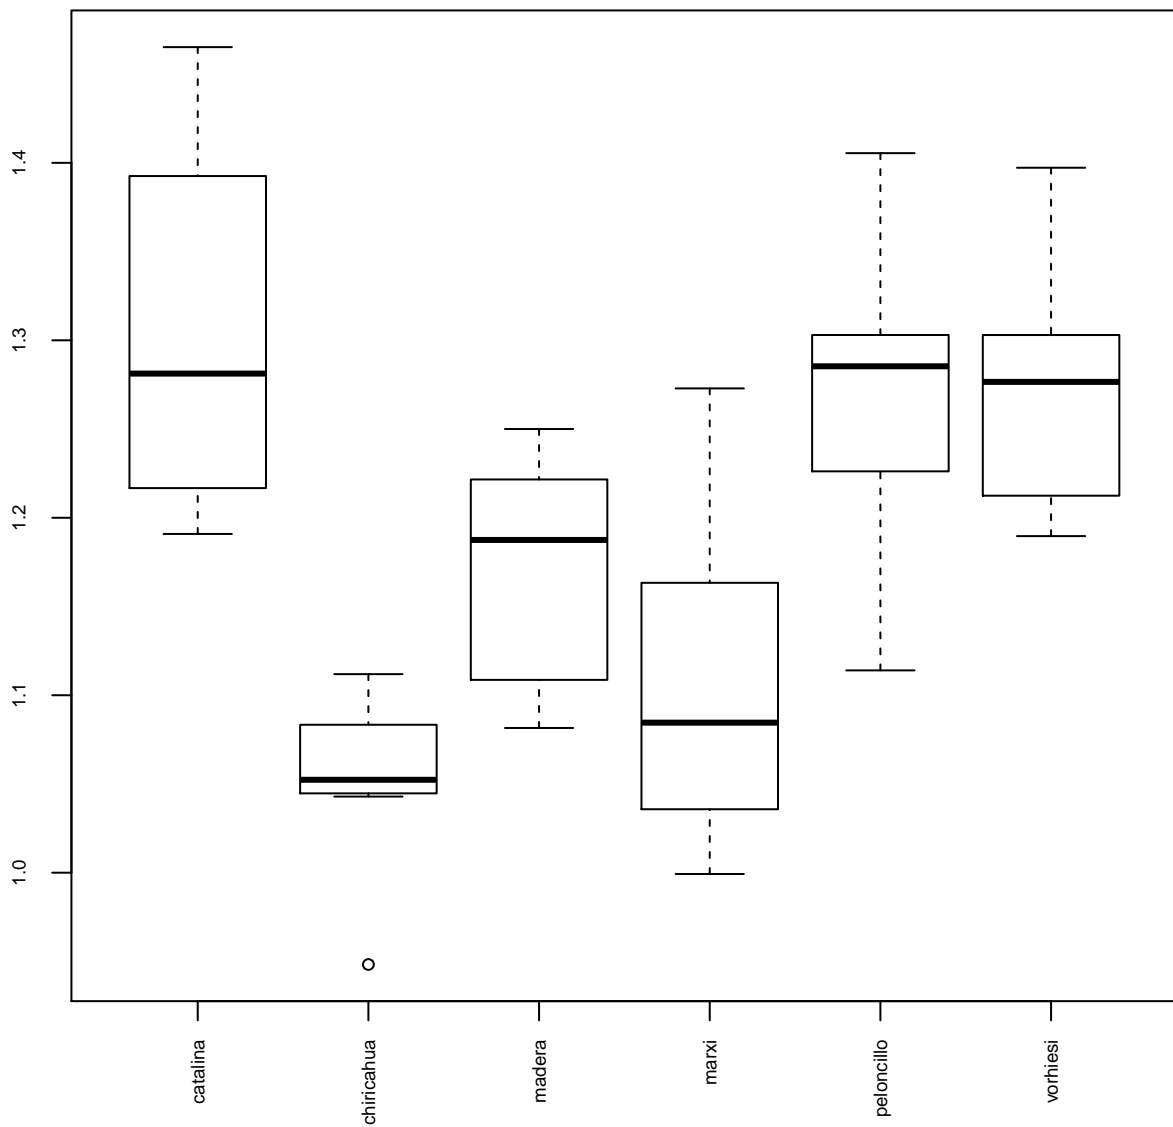

Supplement: Supplementary file 40

## Femur 3 Length/Width ratio – females

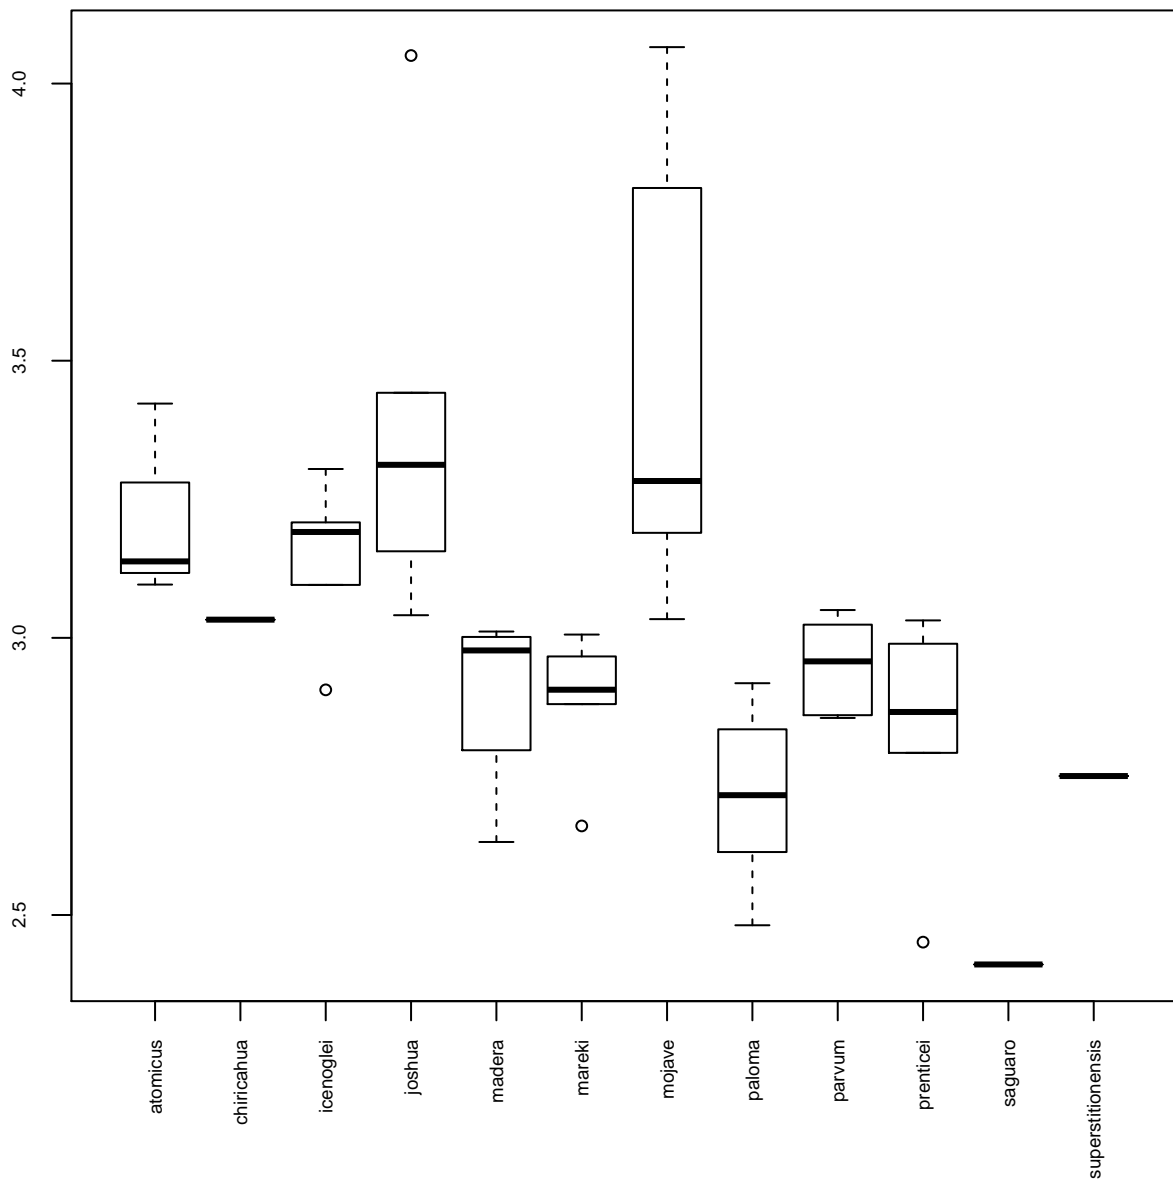

Supplement: Supplementary file 41

## Femur 4/Tarsus 4 ratio – males

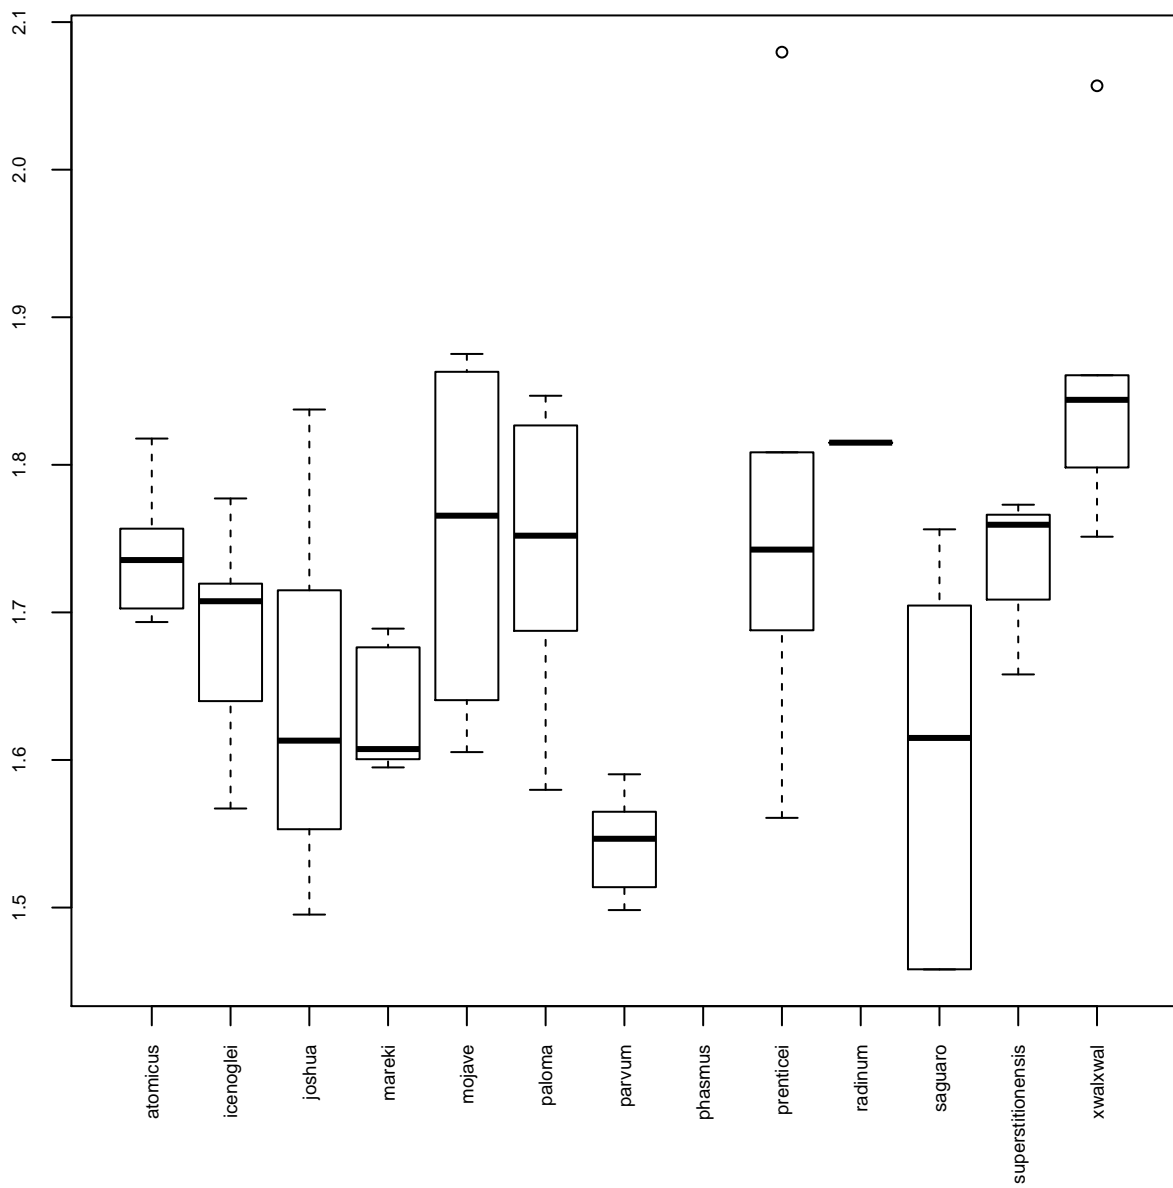

Supplement: Supplementary file 42

## Leg 4 Length/Carapace Length ratio – males

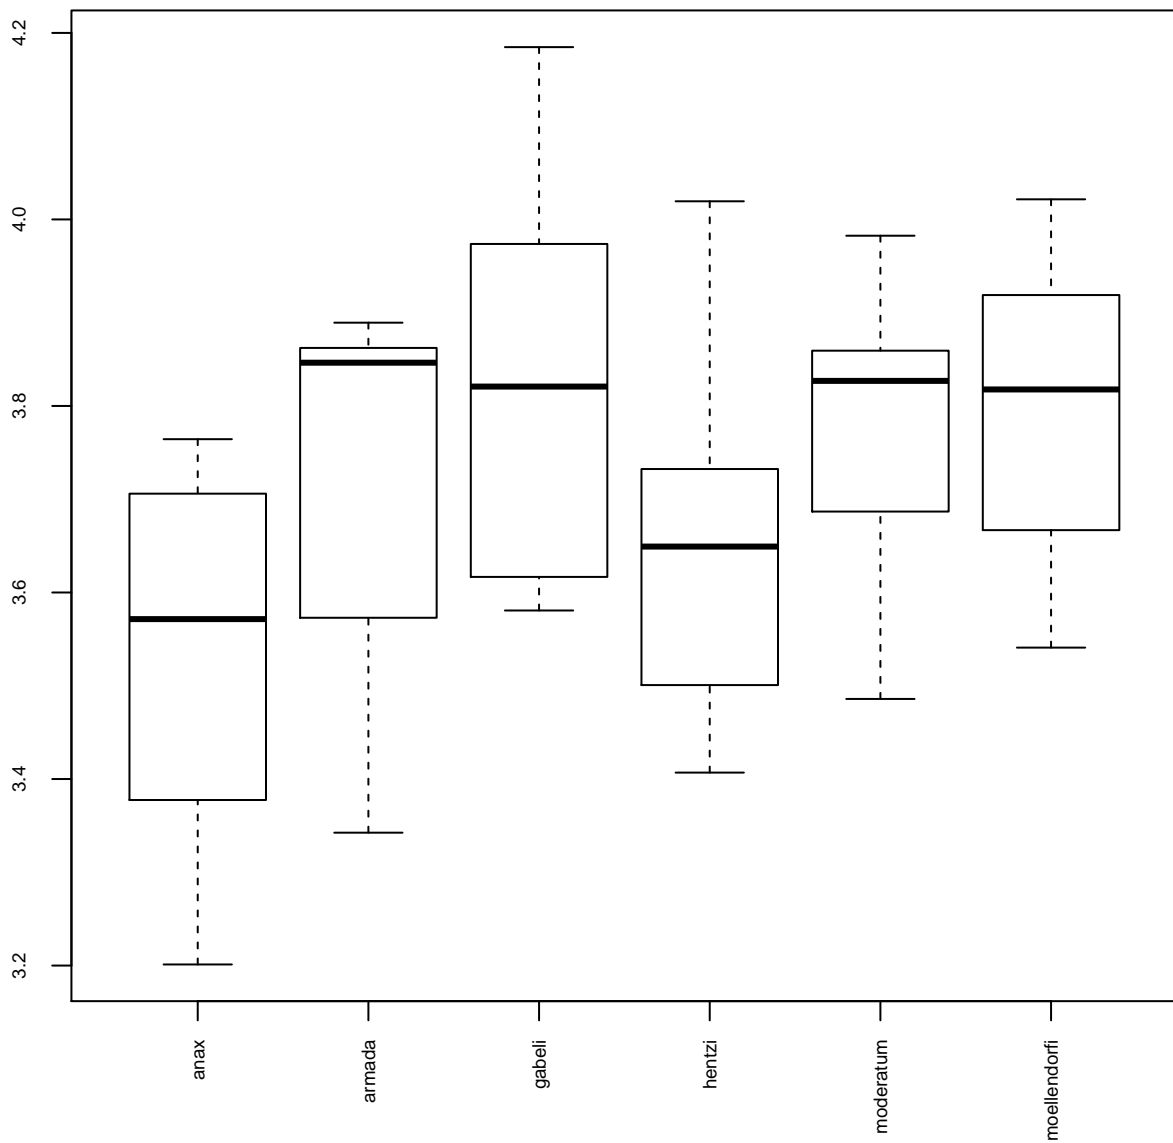

Supplement: Supplementary file 43

## Patella 3/Tarsus 4 Length ratio – males

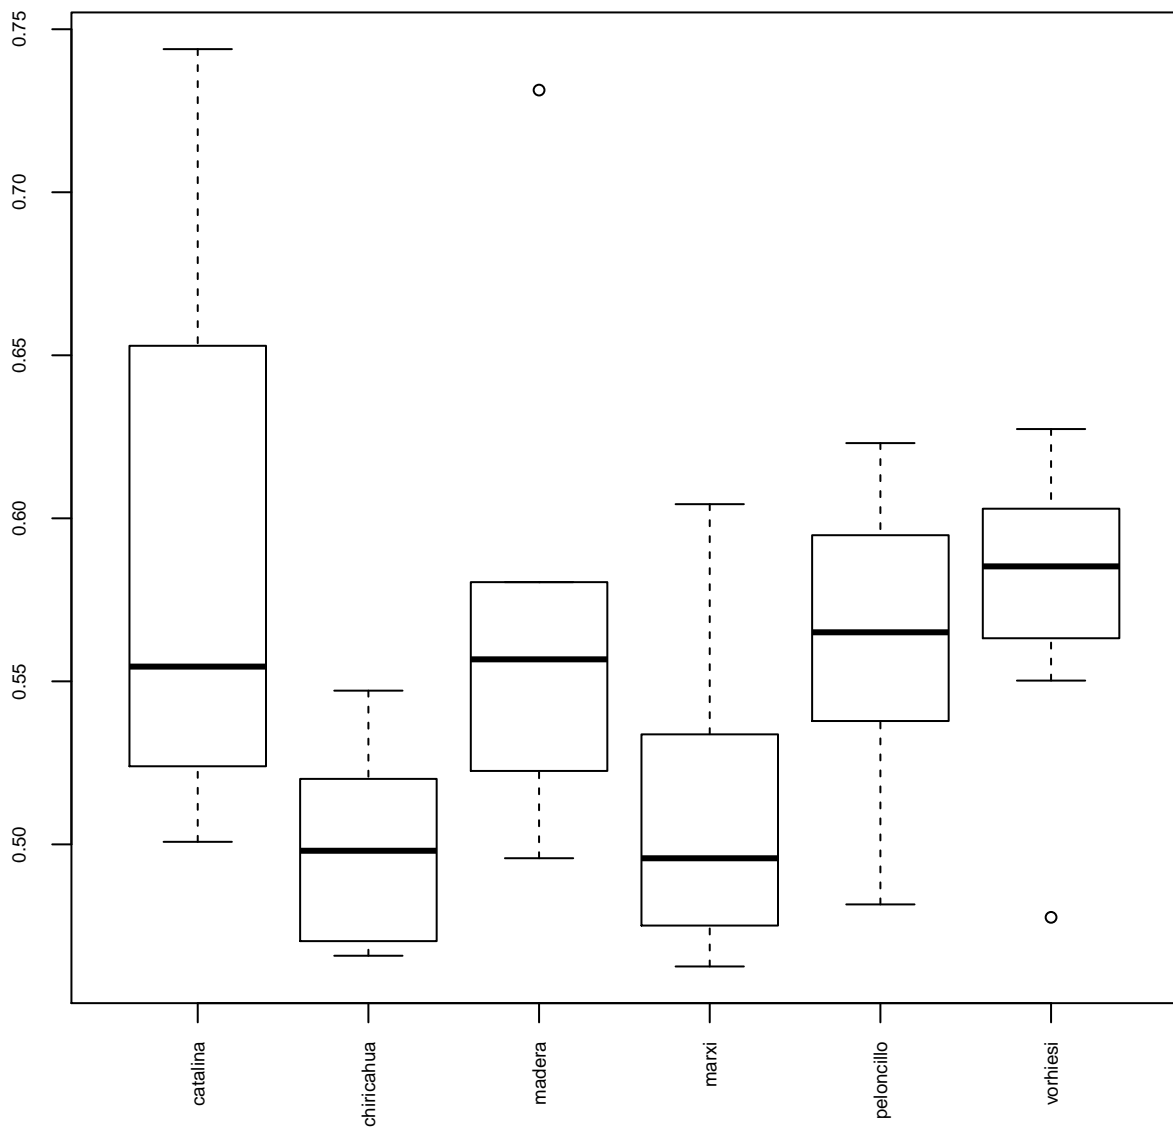

Supplement: Supplementary file 44

## Labial Length/Width ratio – females

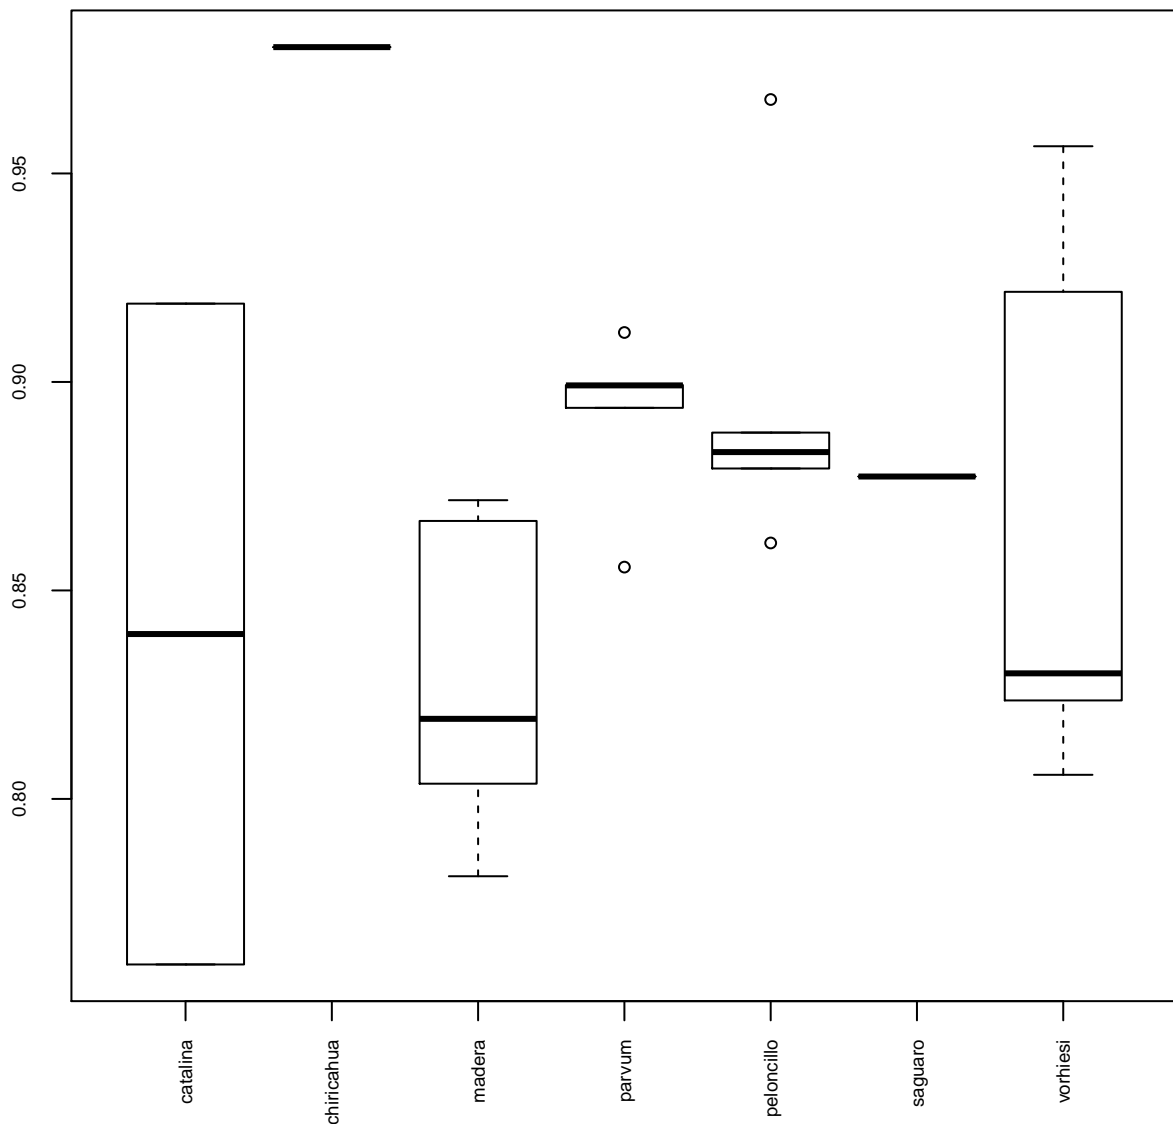

Supplement: Supplementary file 45

## Femur 4/Tibia 4 ratio – males

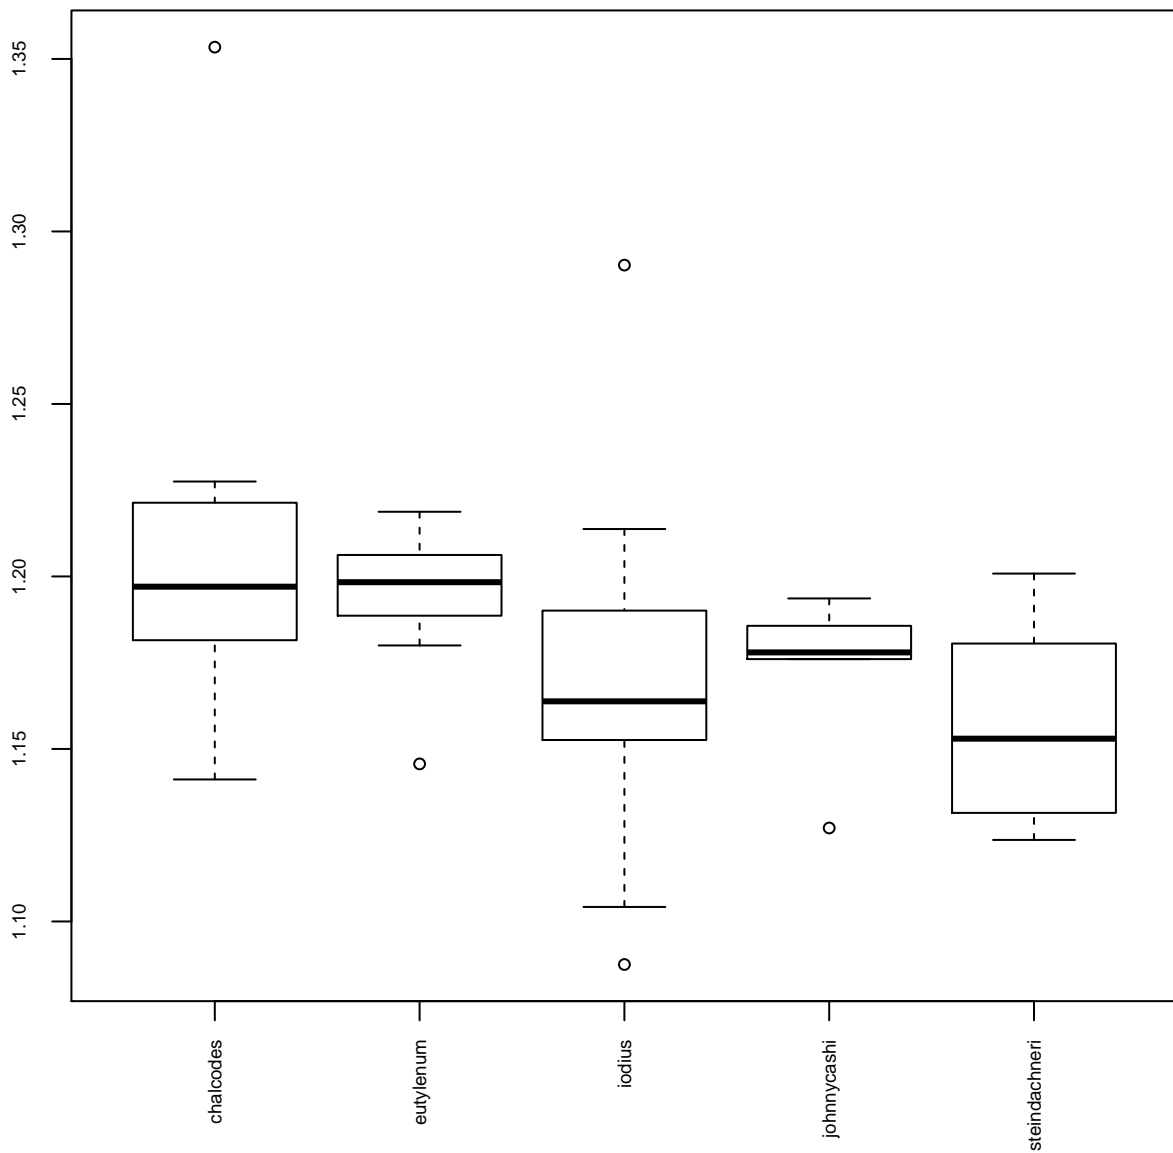

Supplement: Supplementary file 46

# Tibia 1/Metatarsus 3 Length ratio – females

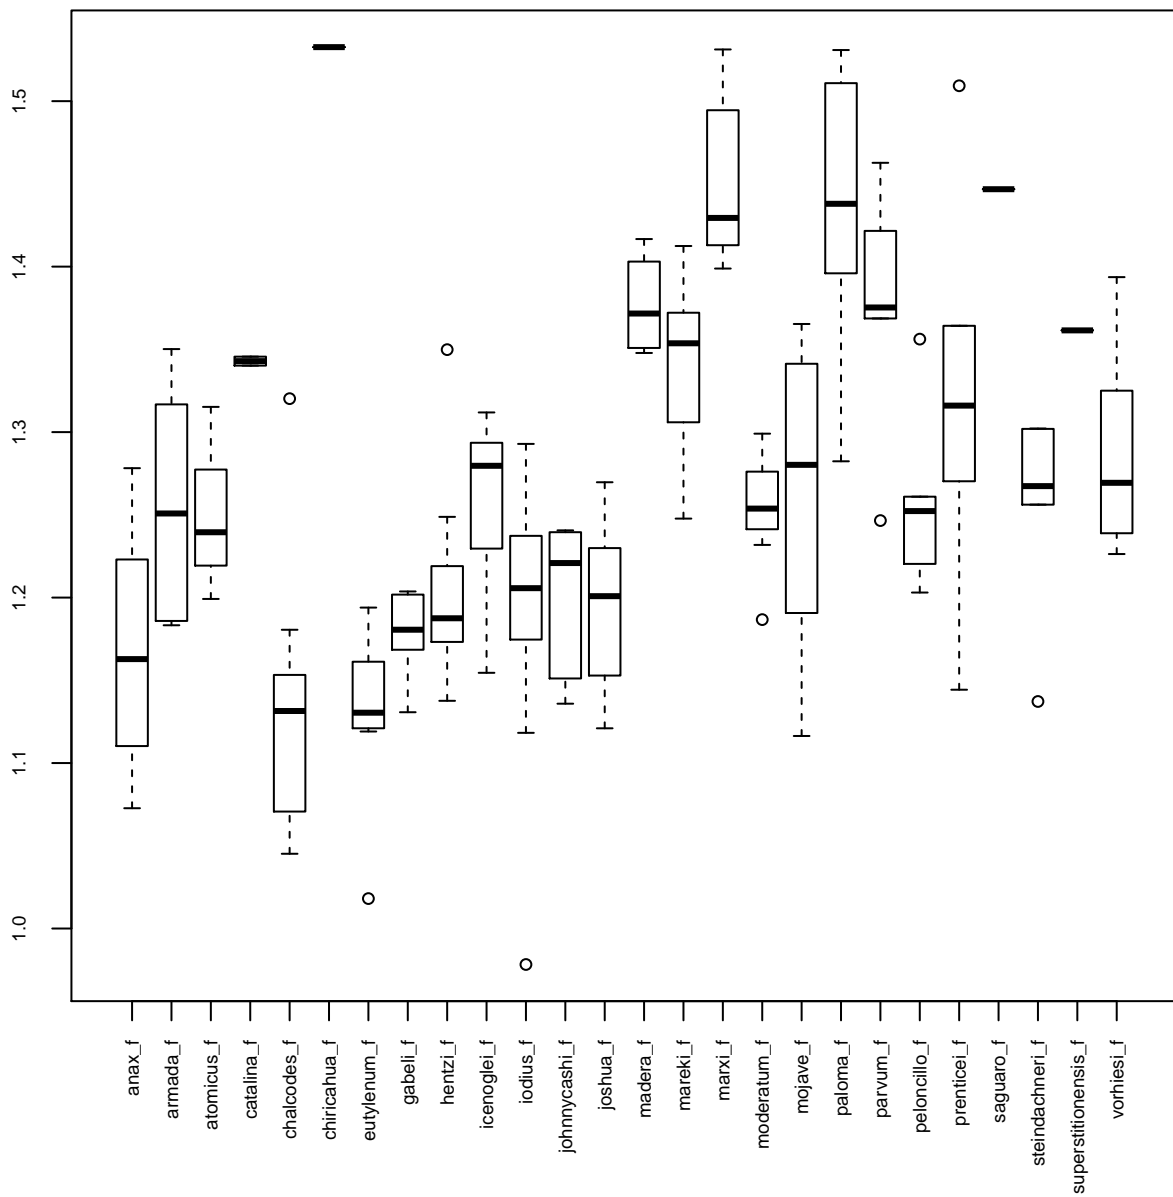

Supplement: Supplementary file 47

## Femur 4 Length/Width ratio – females

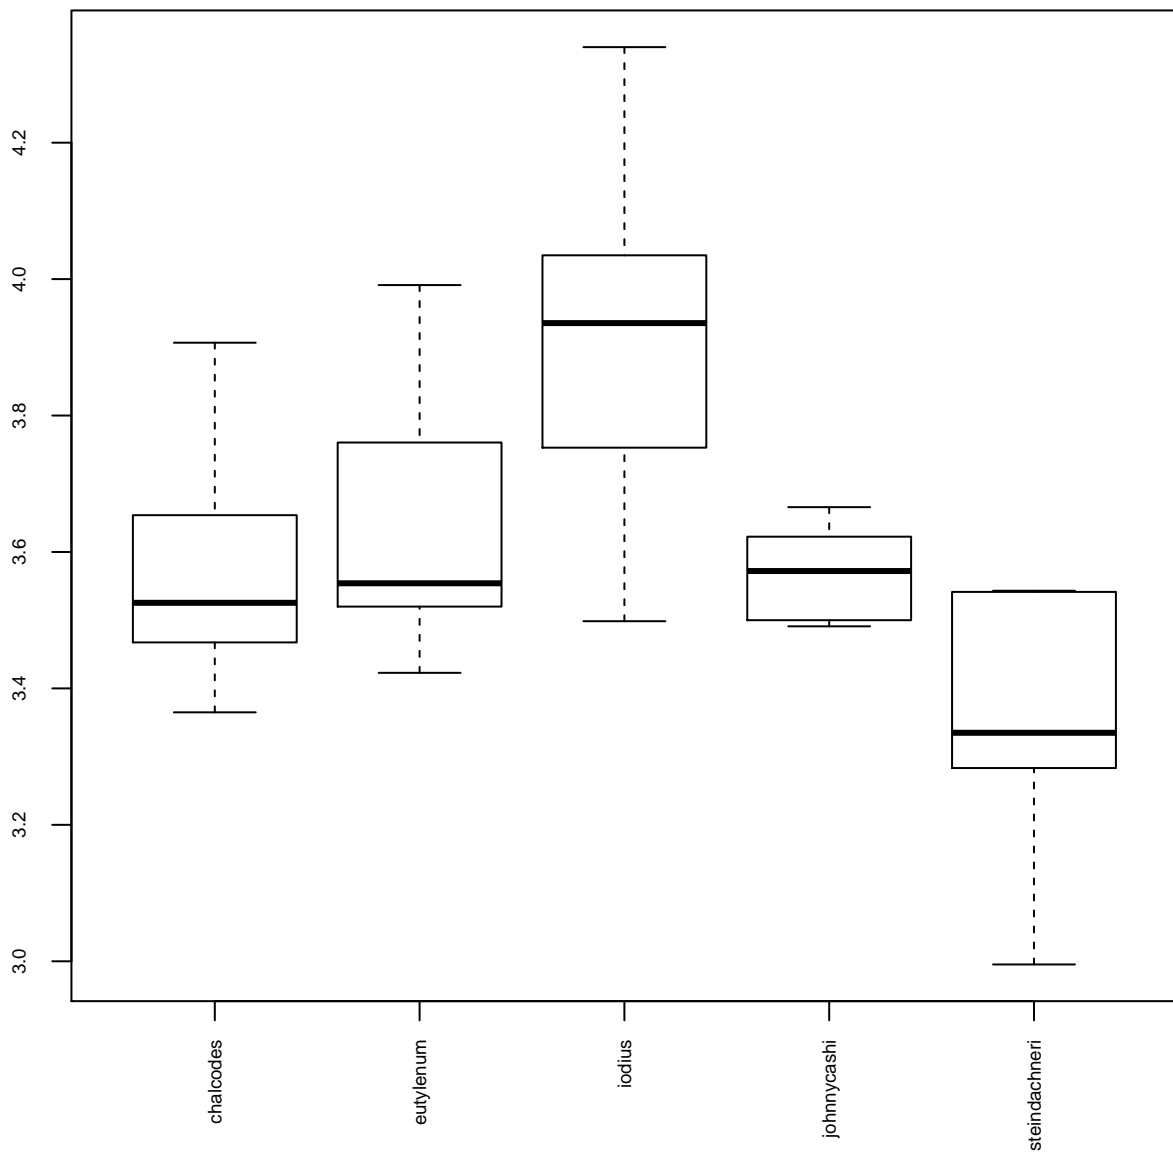

Supplement: Supplementary file 48

## Tibia 4/Tarsus 4 ratio – females

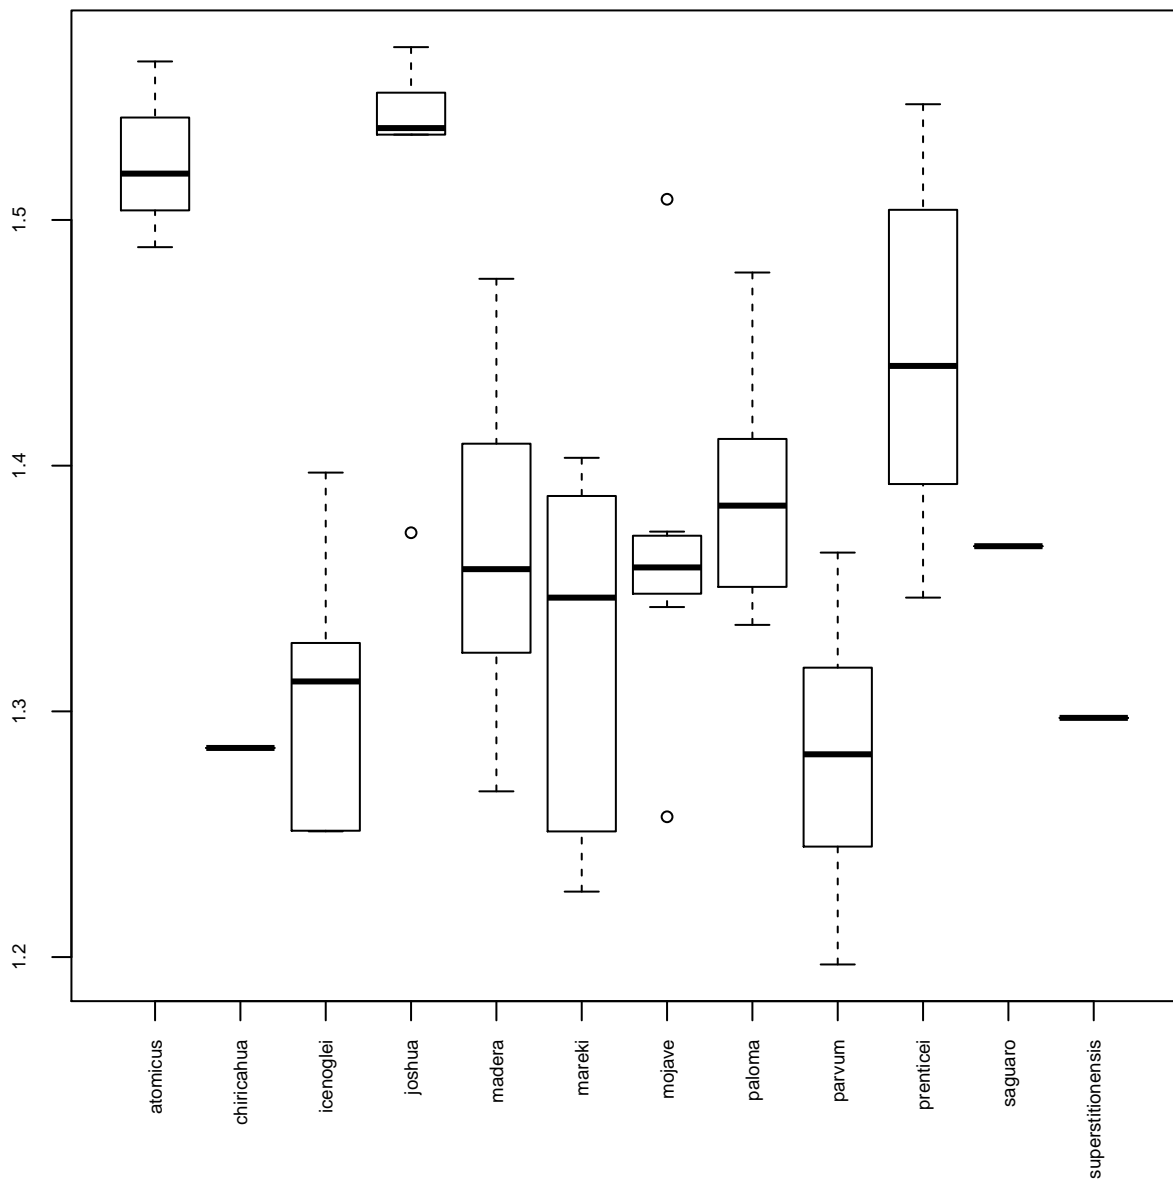

Supplement: Supplementary file 49

## Metatarsus 4/Tarsus 4 ratio – males

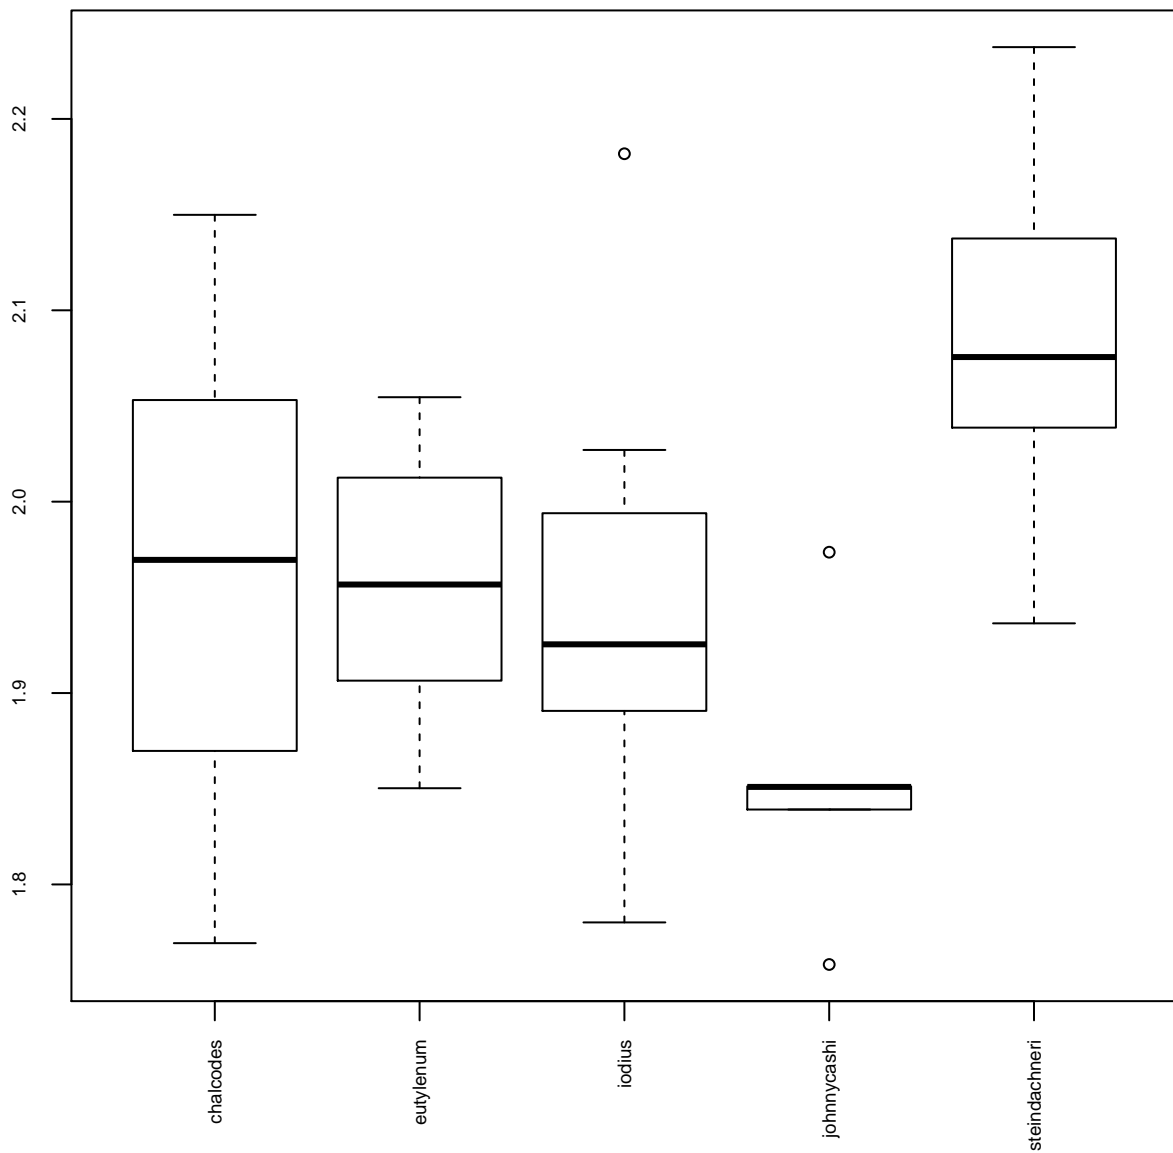

Supplement: Supplementary file 50

## Tarsus 1/Metatarsus 3 Length ratio – females

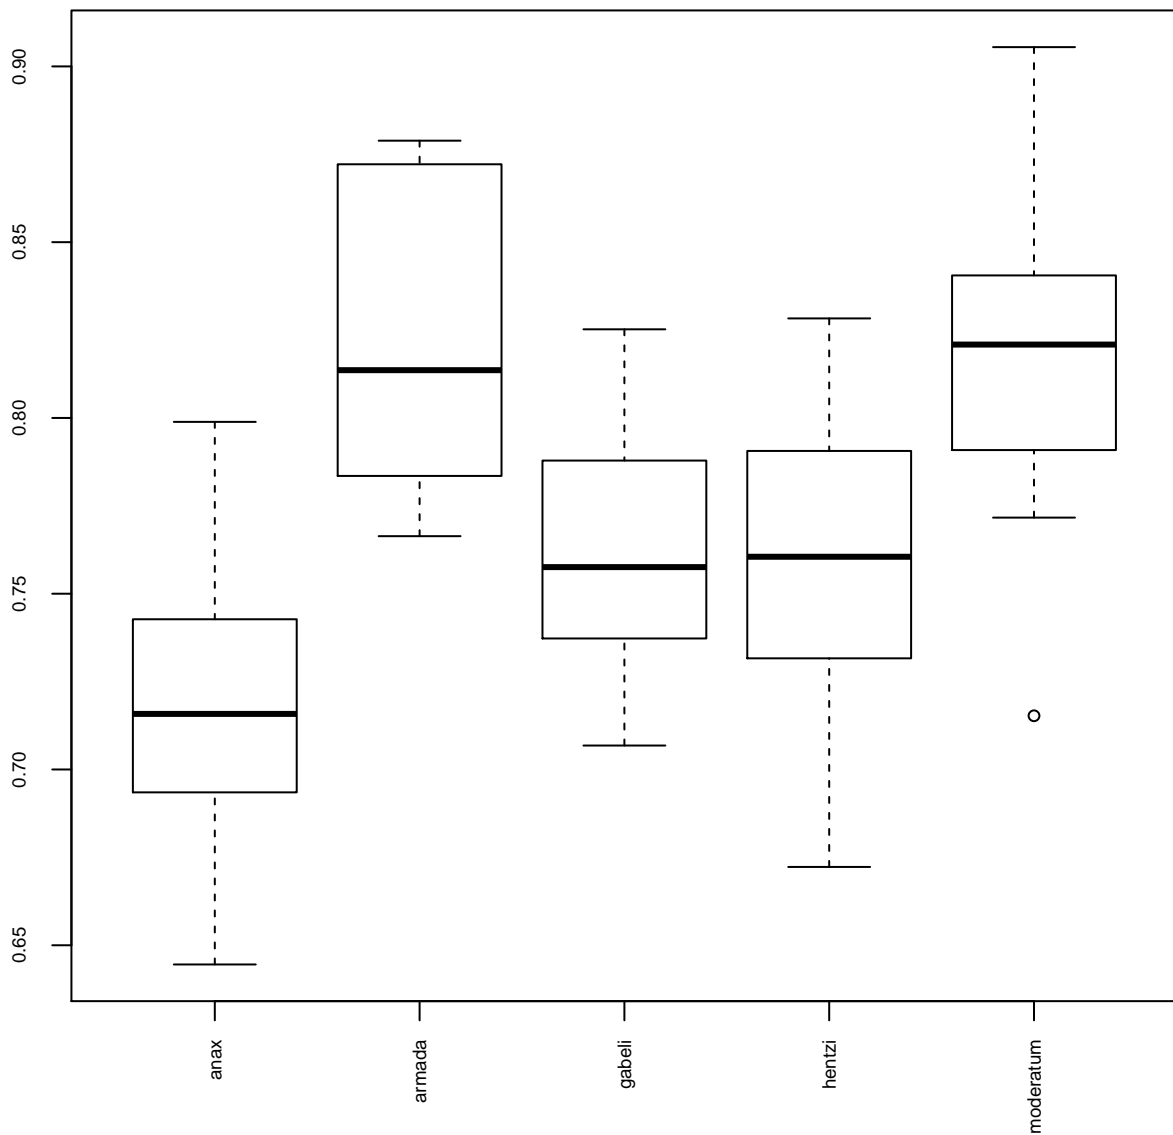

Supplement: Supplementary file 51

## Femur 3/Patella 3 ratio – males

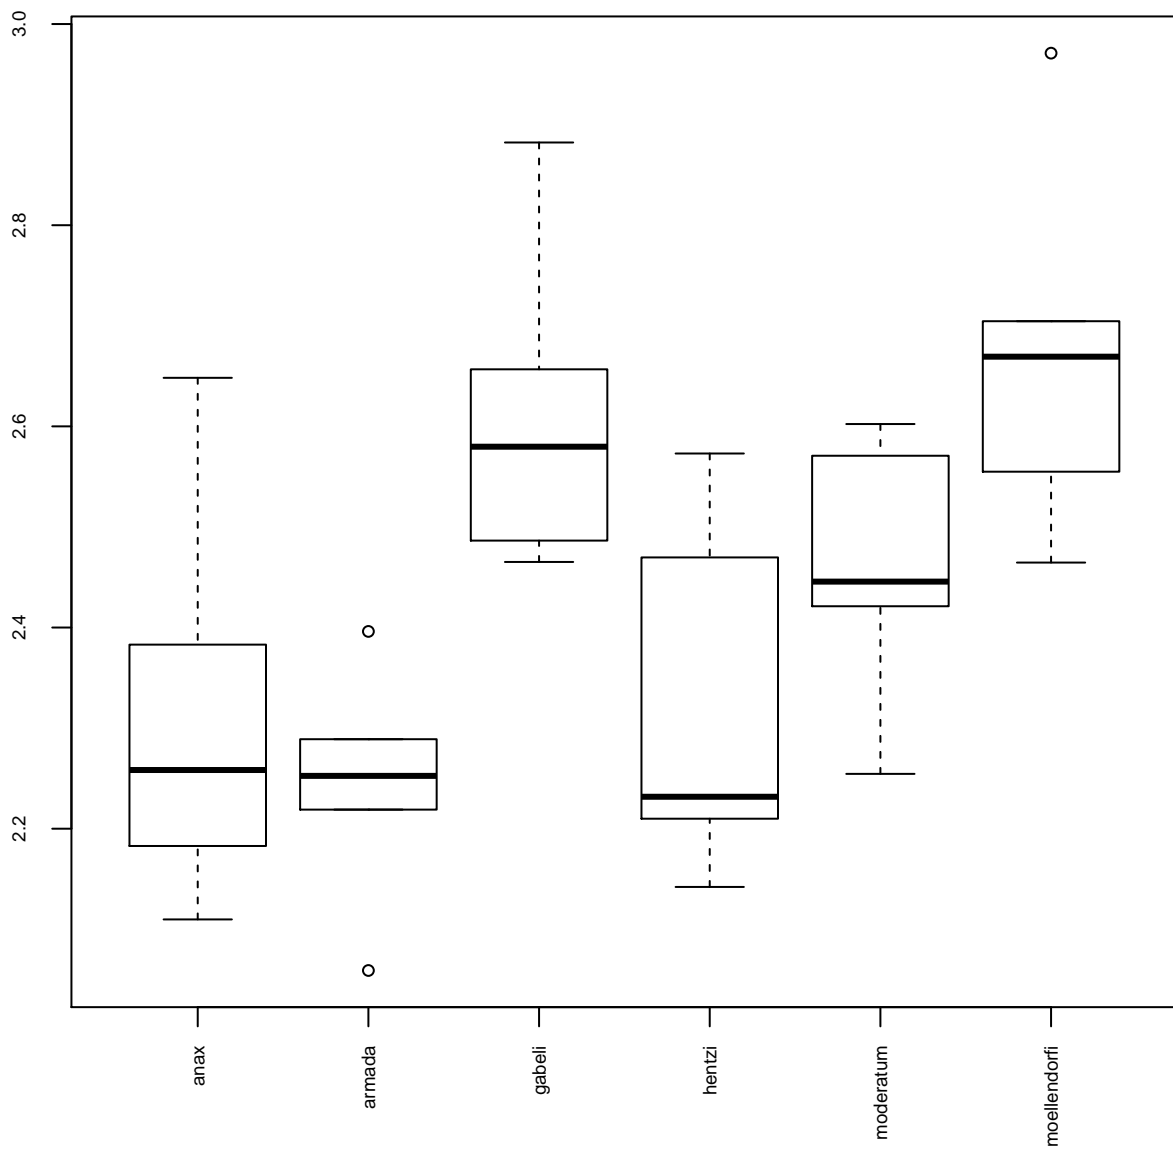

Supplement: Supplementary file 52

## Femur 3/Patella 3 ratio – females

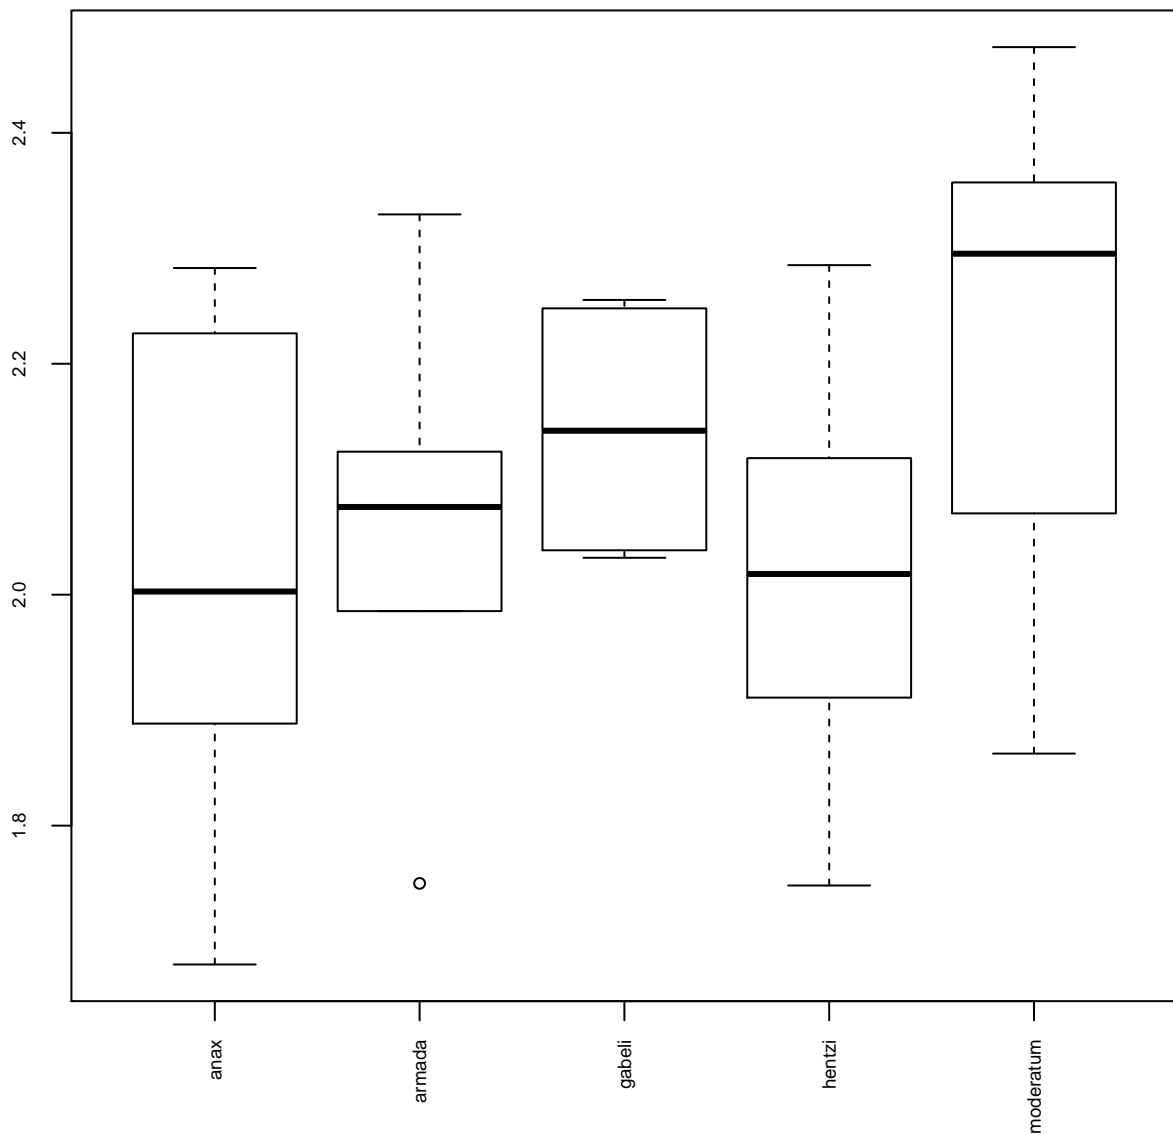

Supplement: Supplementary file 53

## Carapace Length/Tibia 4 ratio – males

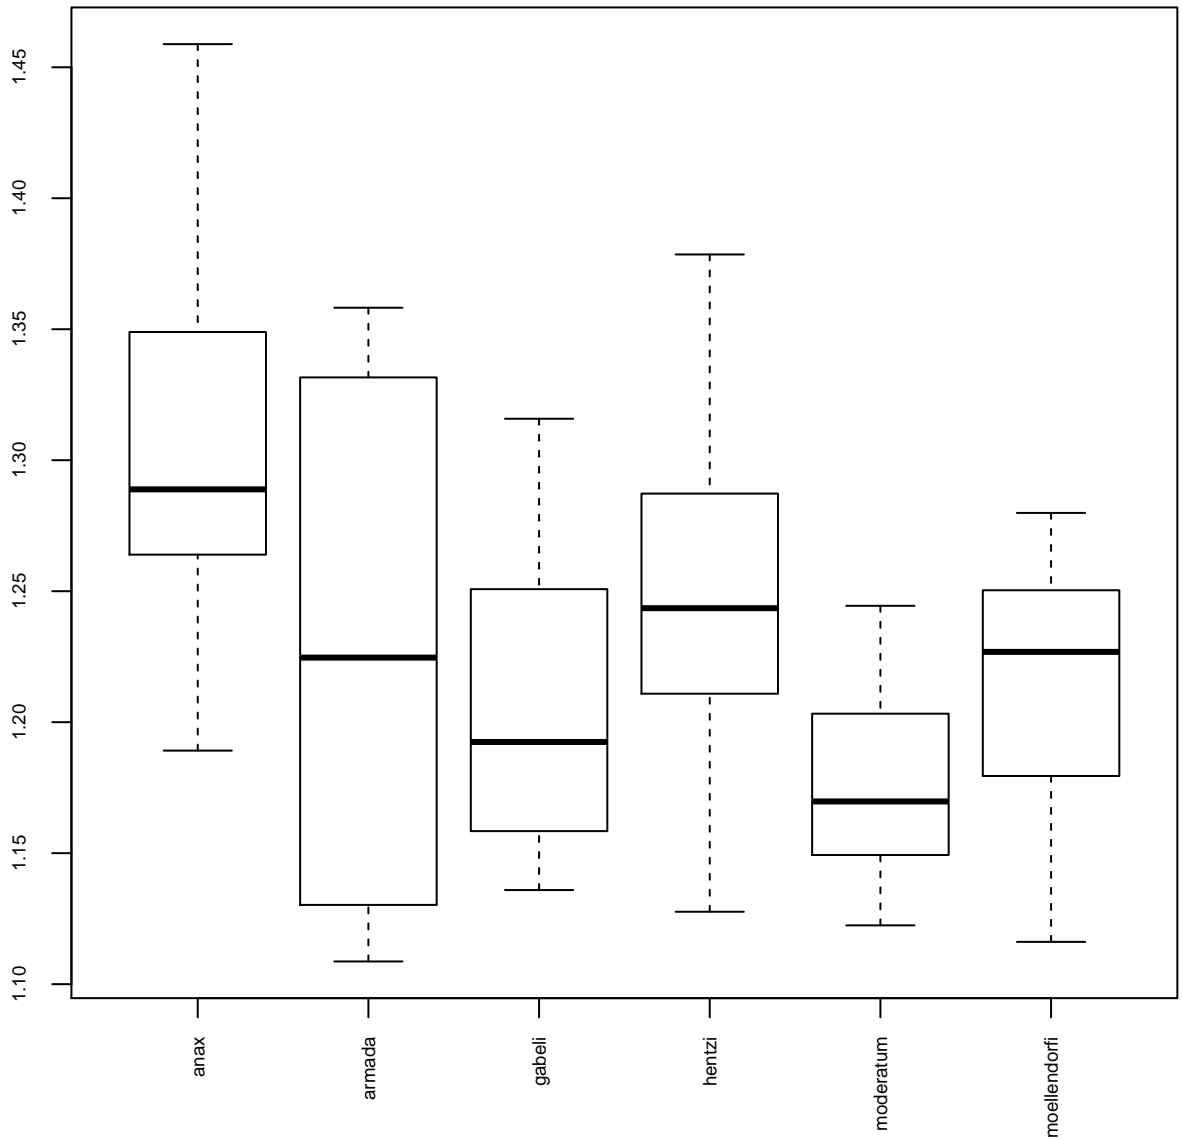

Supplement: Supplementary file 54

## Tarsus 3/Patella 4 Length ratio – males

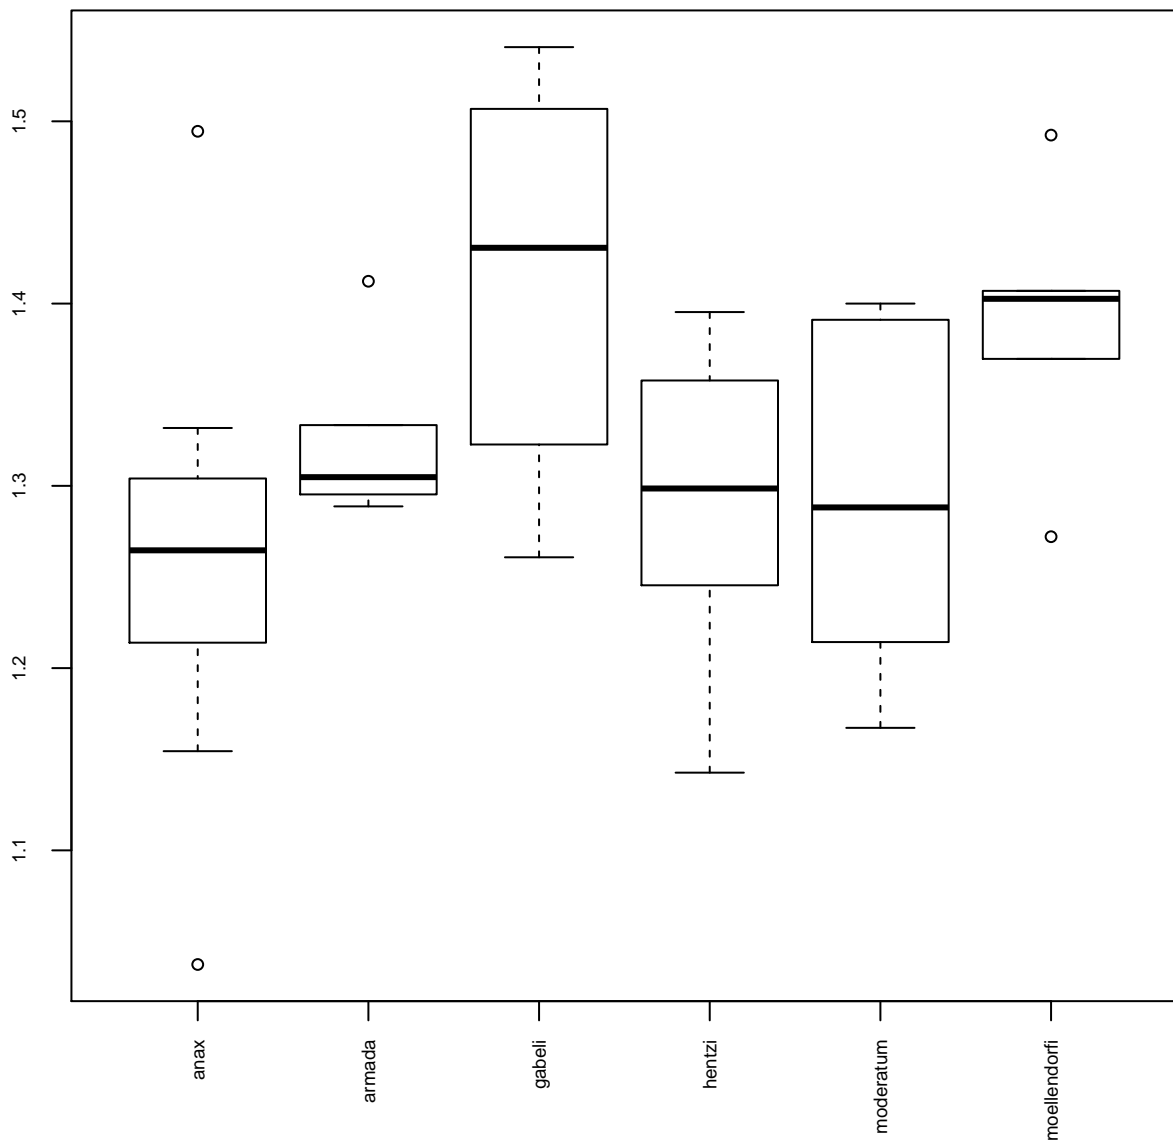

Supplement: Supplementary file 55

## Femur 1/Tibia 3 ratio – females

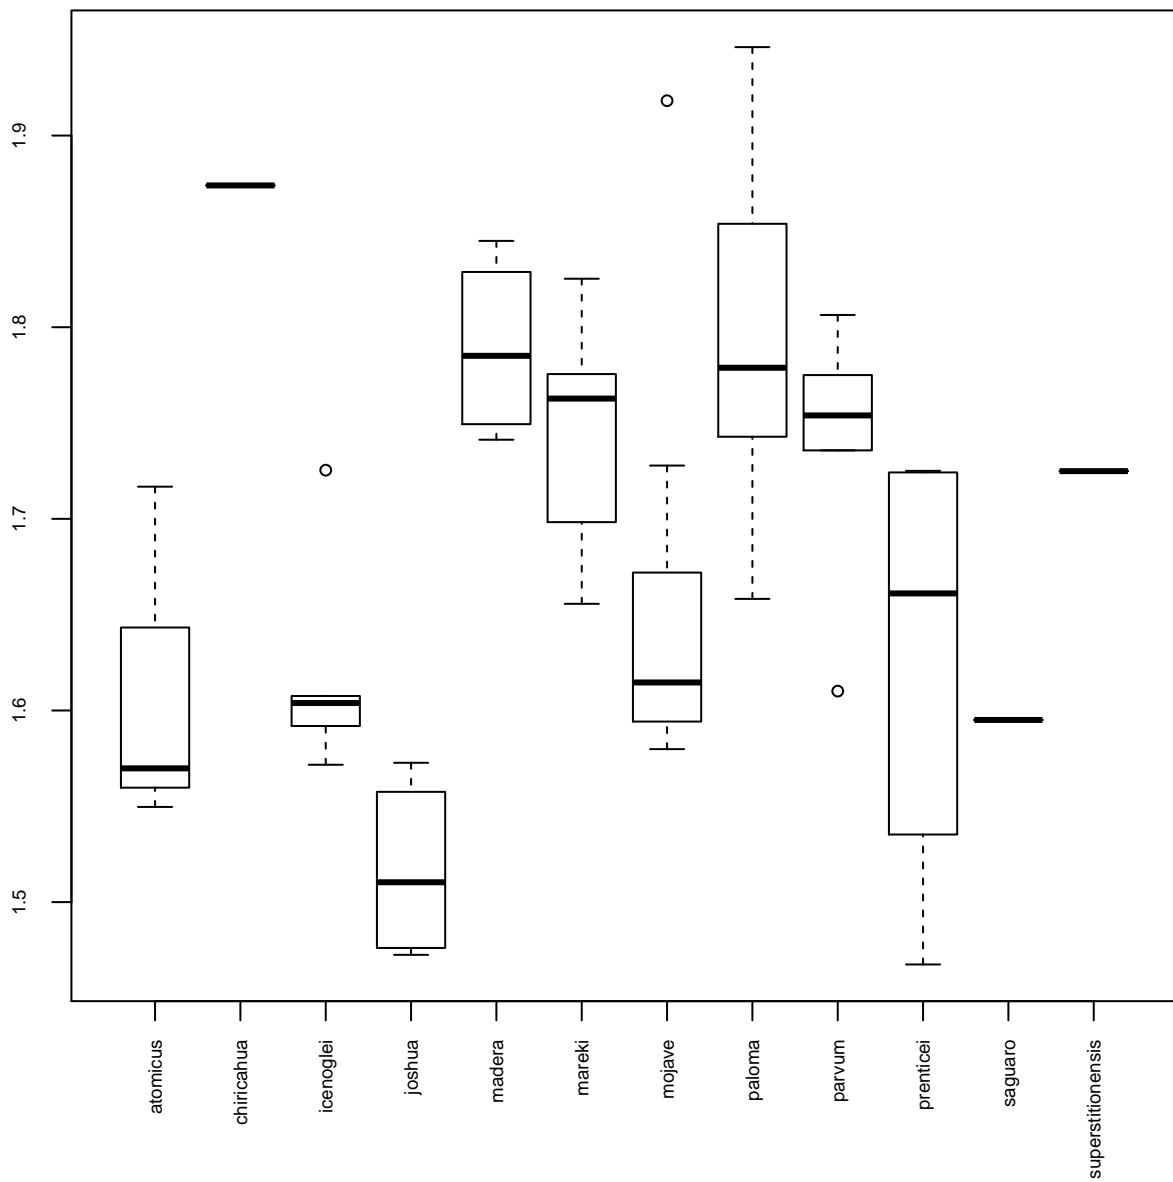

Supplement: Supplementary file 56

## Patella 1/Tibia 1 ratio – males

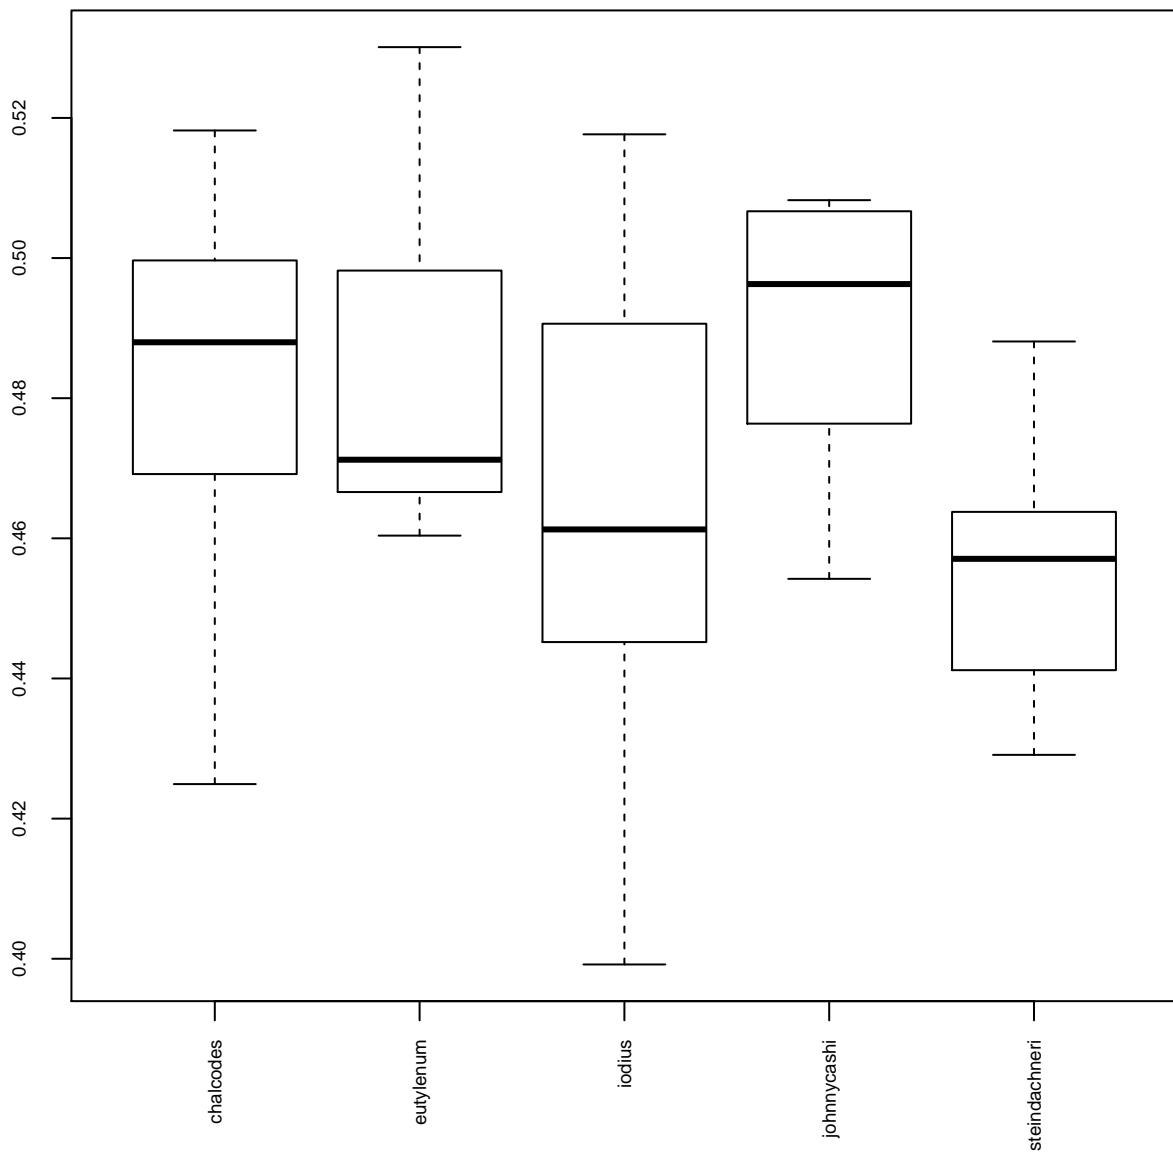

Supplement: Supplementary file 57

# Patella 3/Tibia 3 ratio – males

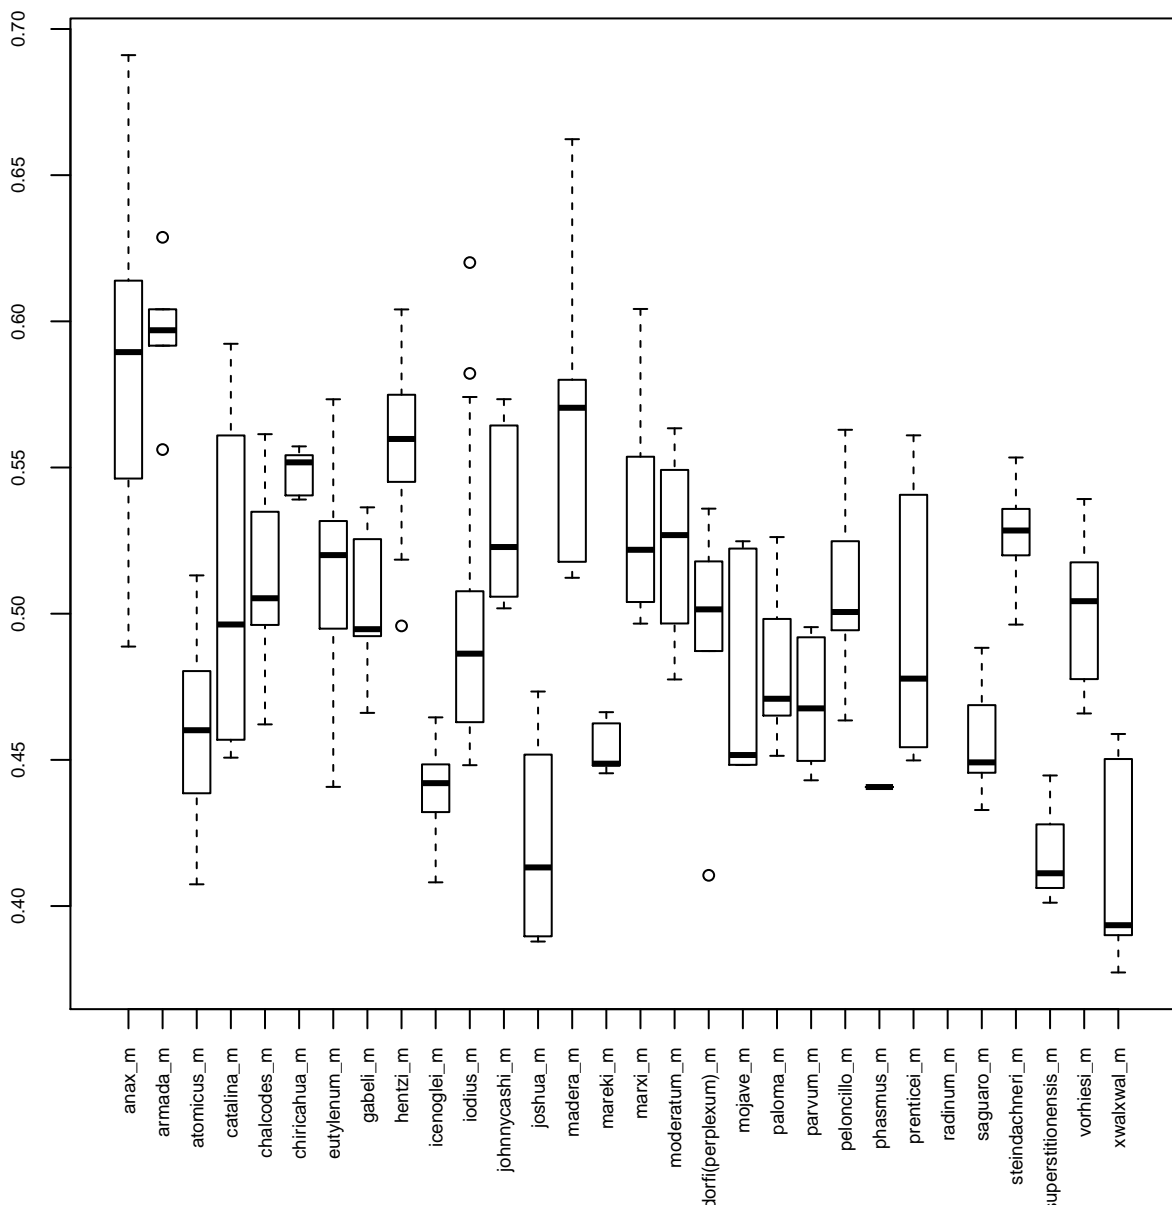

Supplement: Supplementary file 58

## Leg 3/Leg 4 Length ratio – males

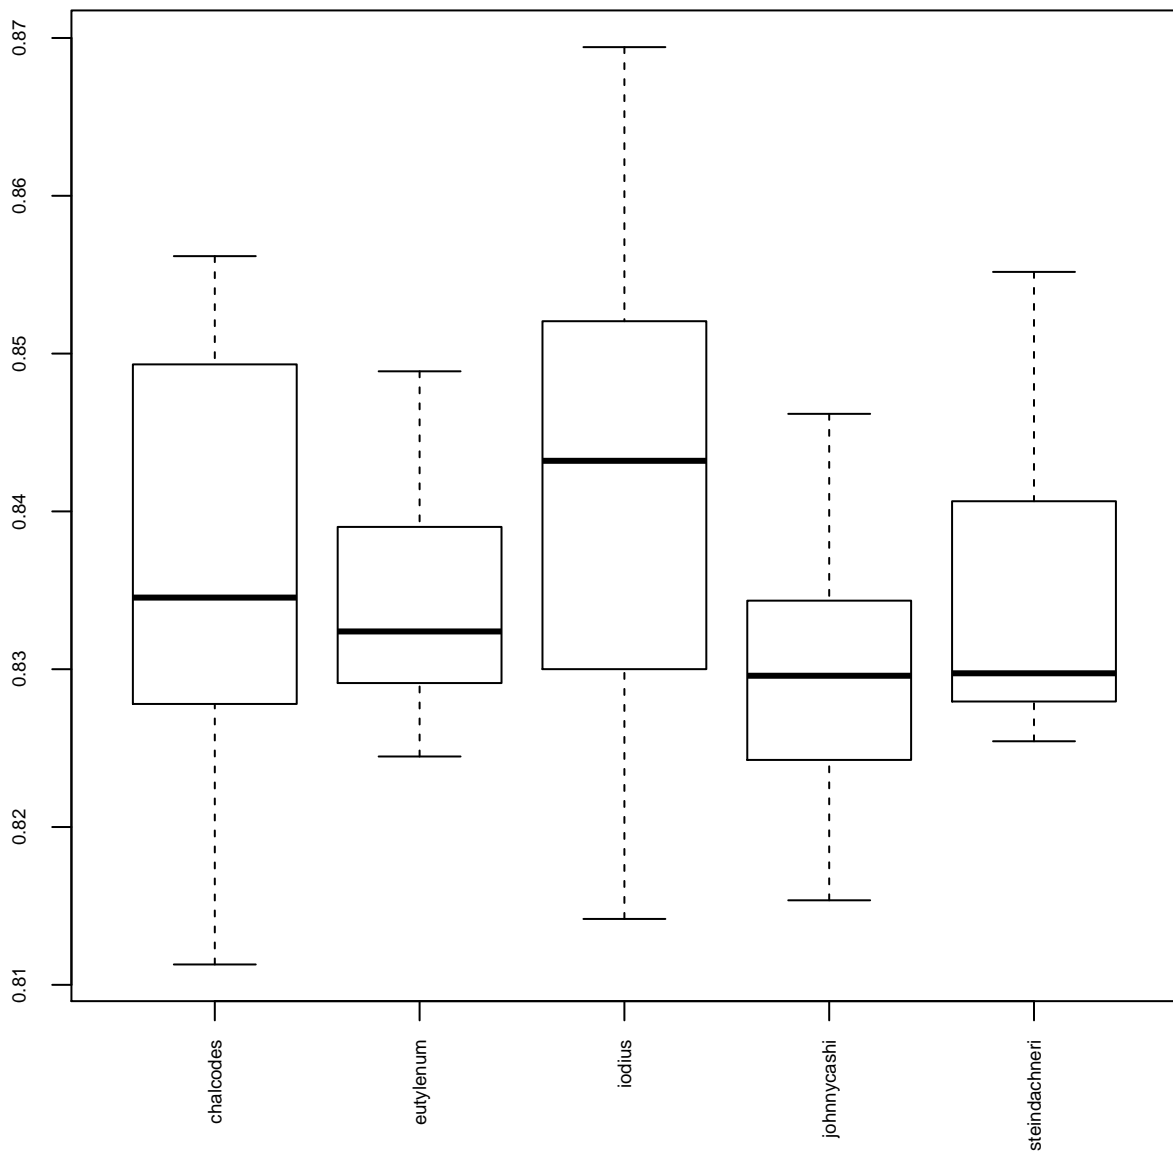

Supplement: Supplementary file 59

## Femur 1/Tibia 4 ratio – females

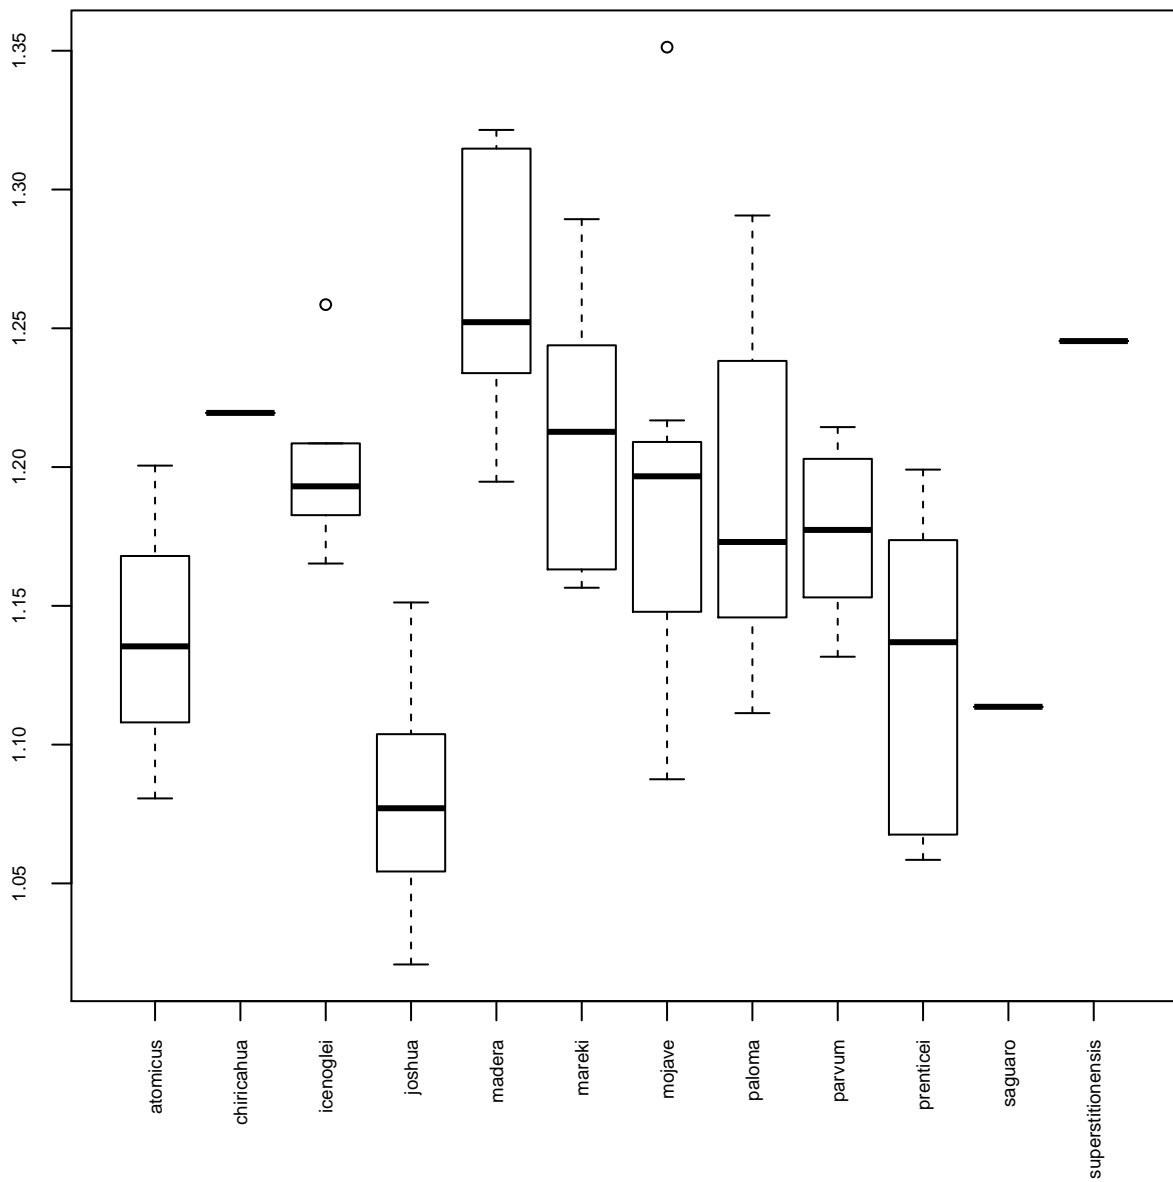

Supplement: Supplementary file 60

## Femur 3/Tibia 3 ratio – females

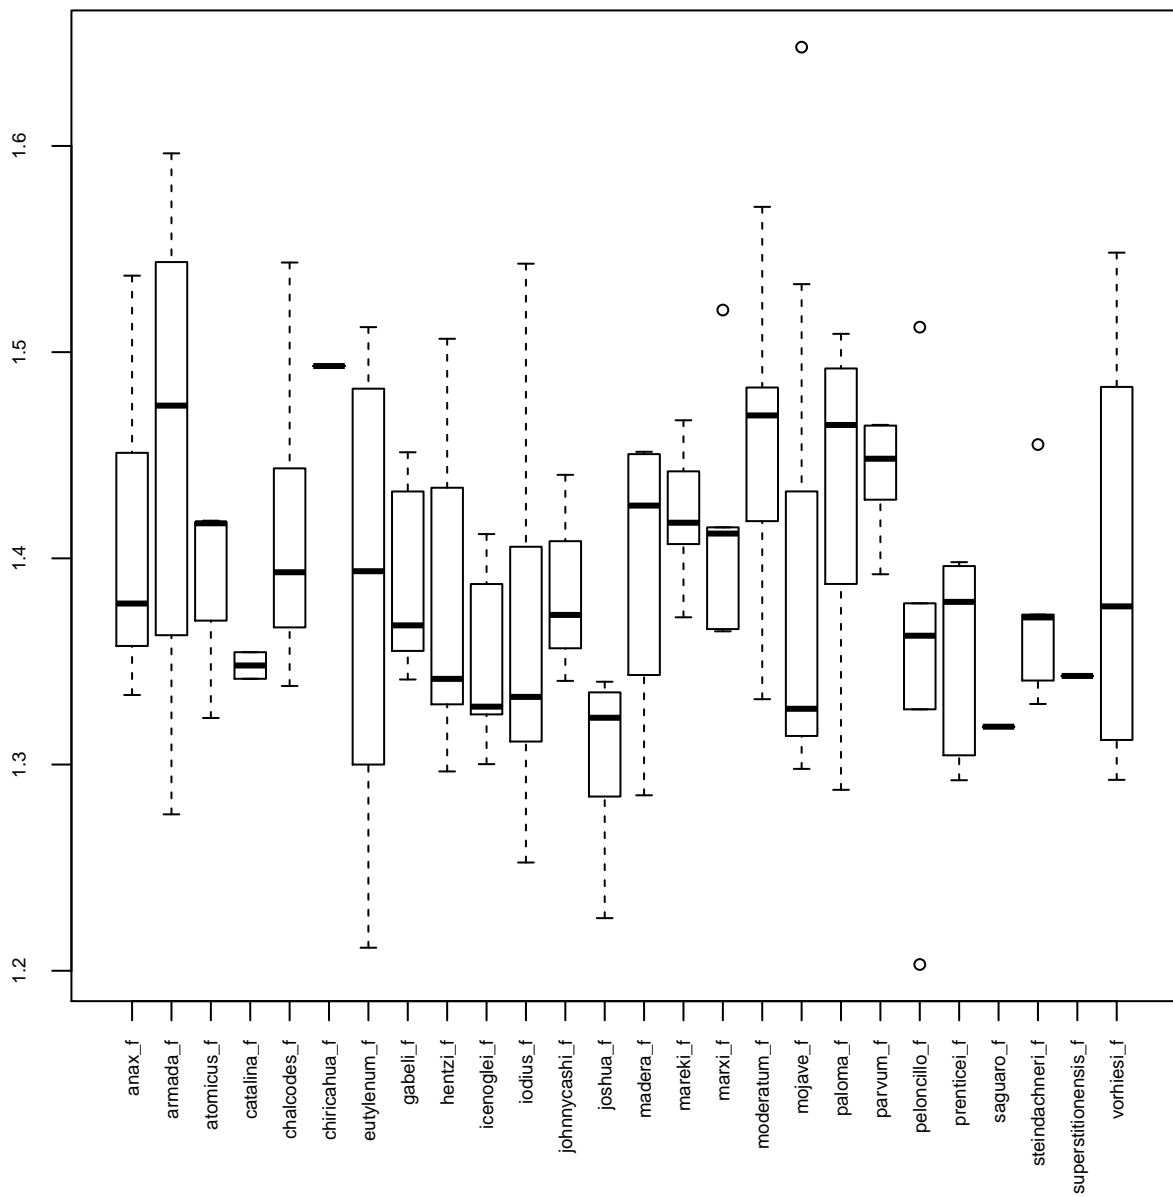

Supplement: Supplementary file 61

### Femur 1/Tibia 1 ratio – males

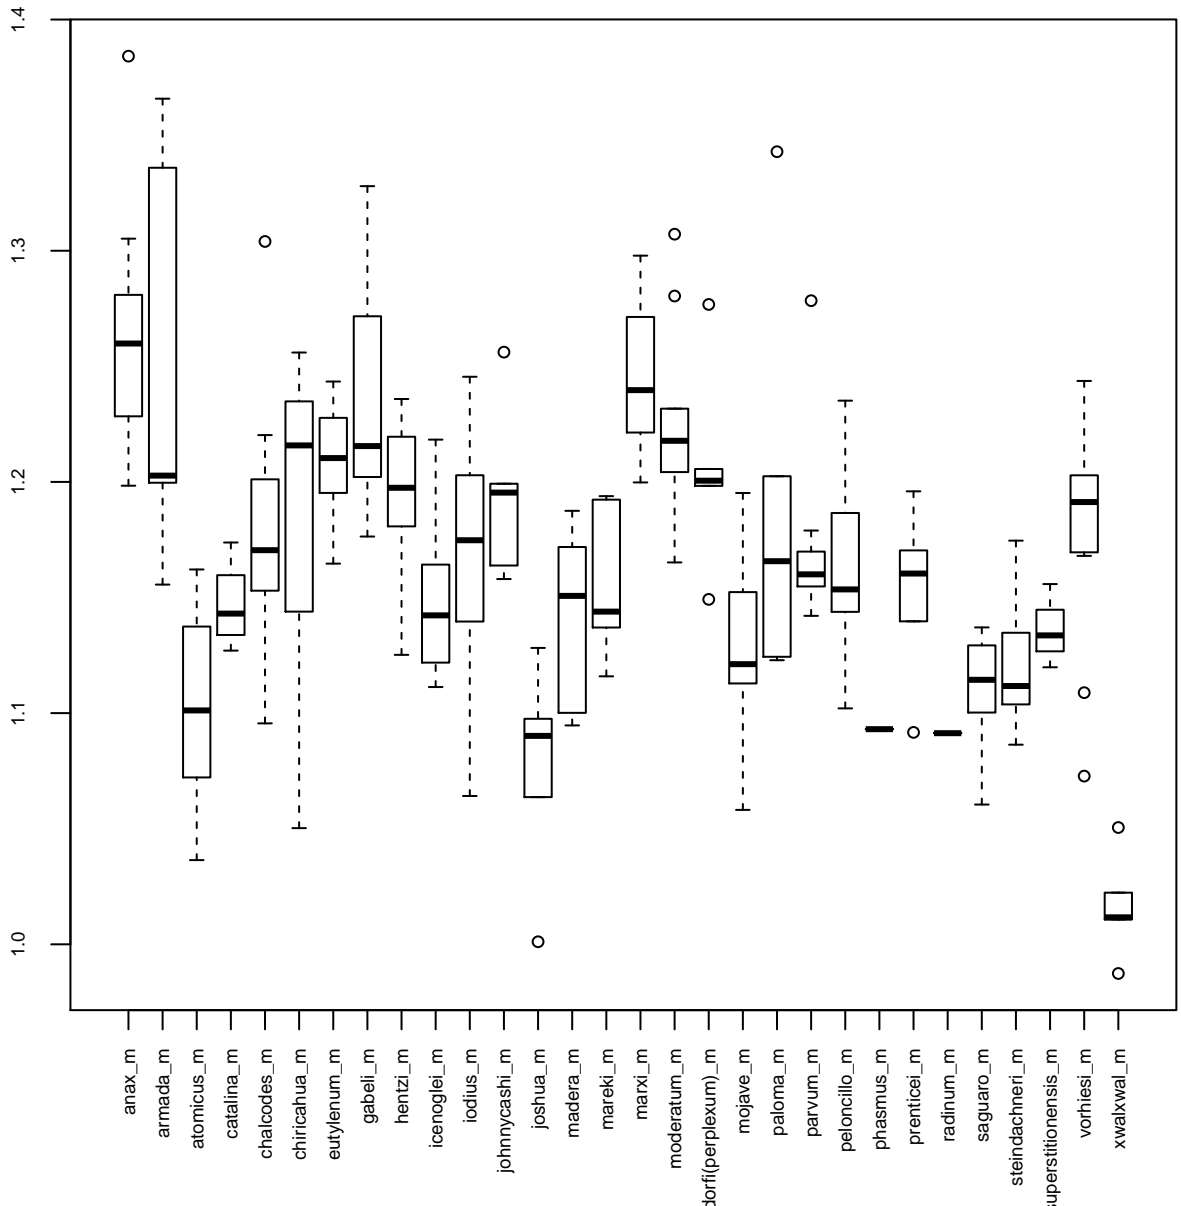

Supplement: Supplementary file 62

## Tibia 1/Femur 4 Length ratio – females

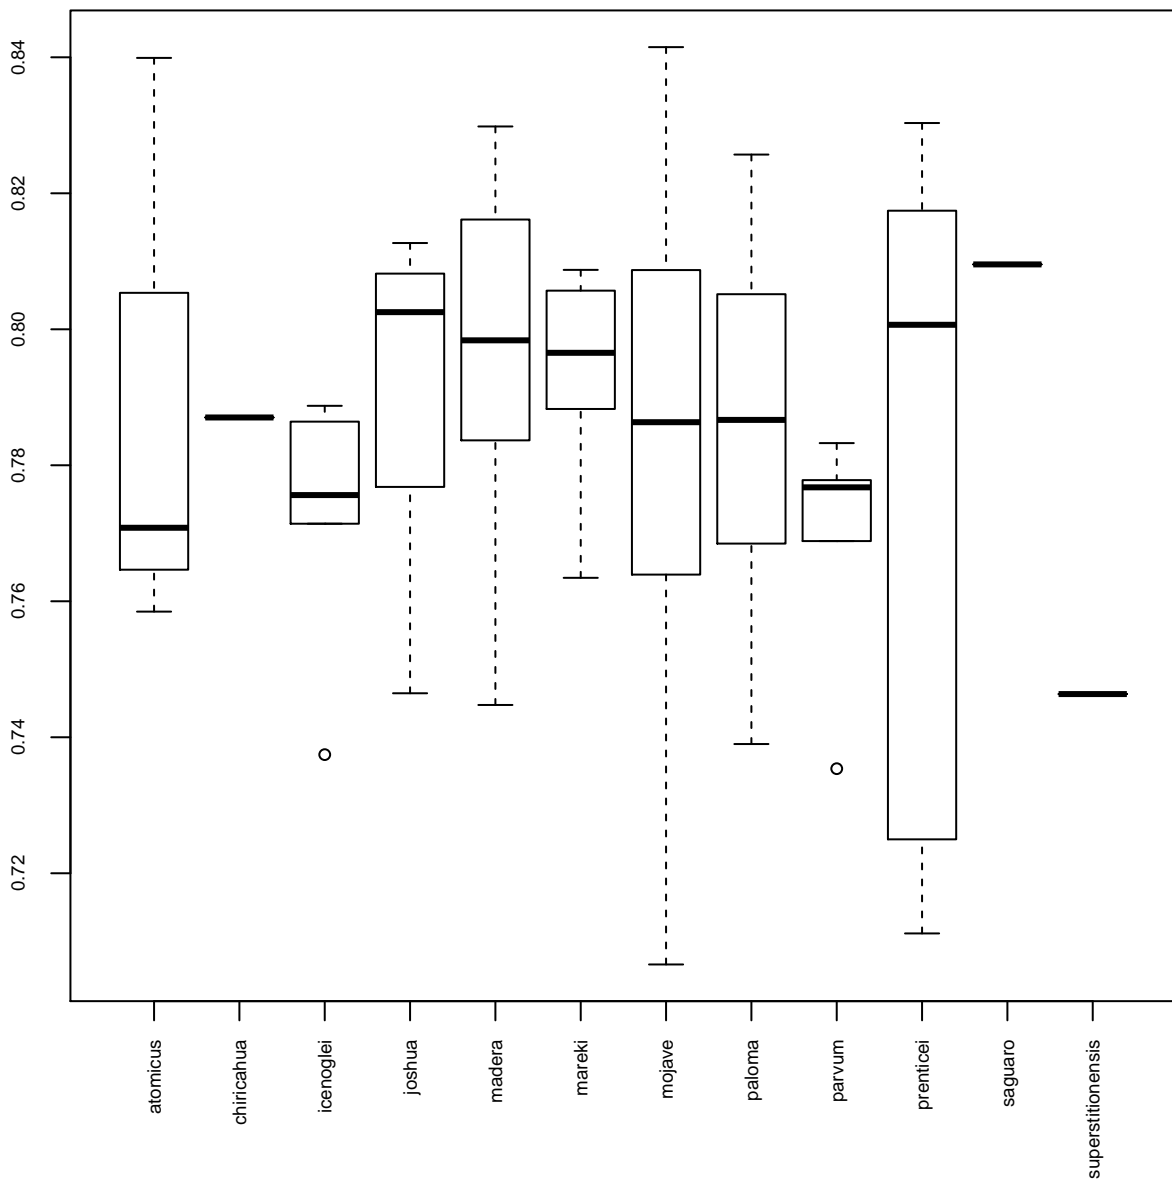

Supplement: Supplementary file 63

## Femur 4/Tibia 4 ratio – males

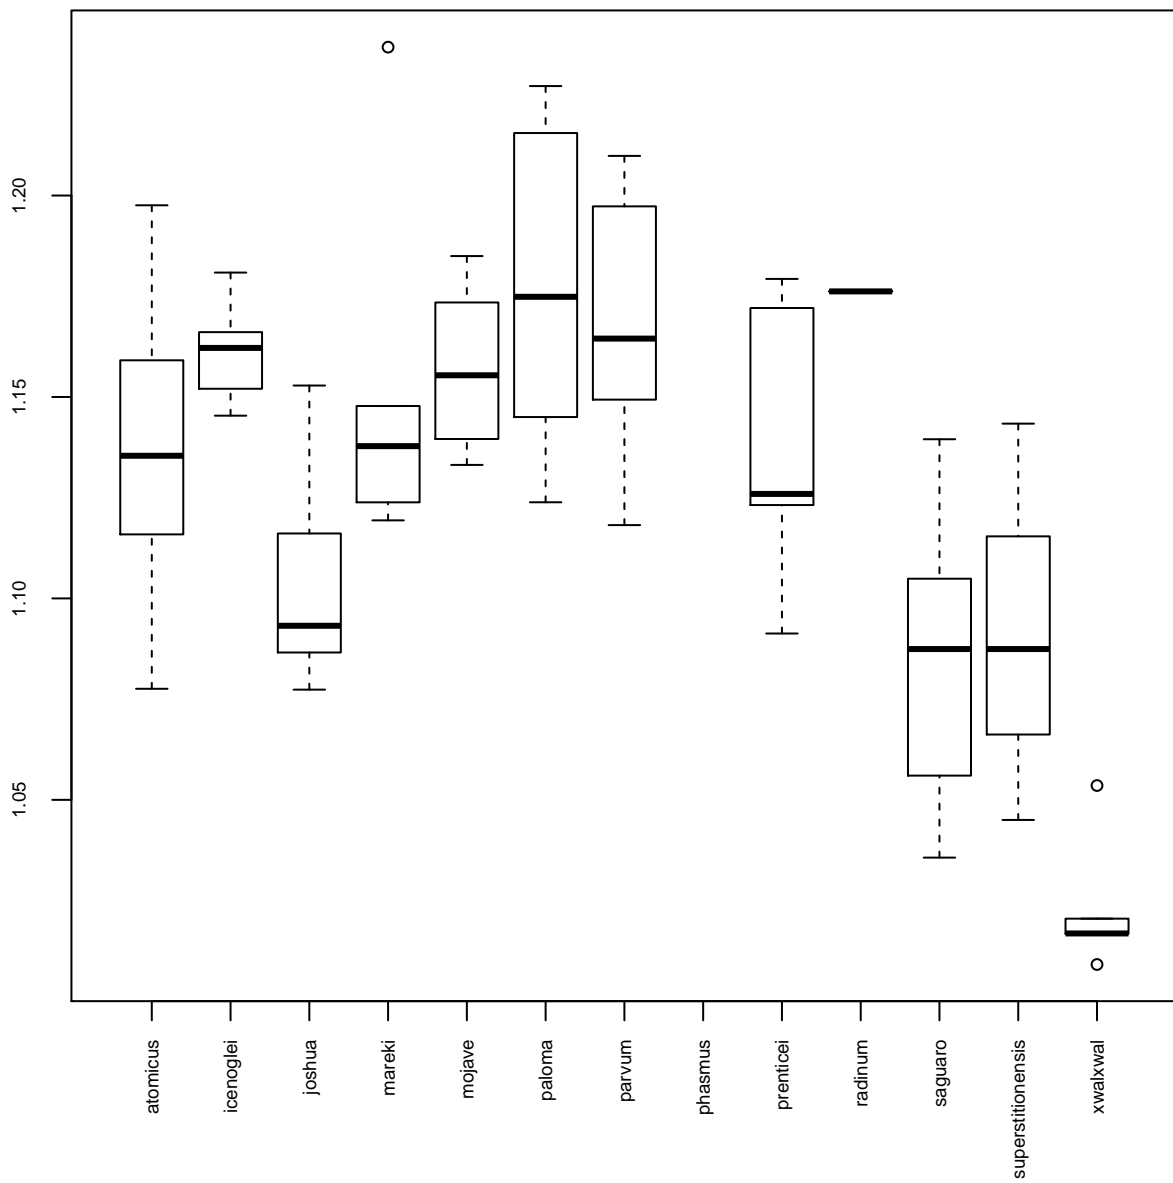

Supplement: Supplementary file 64

## Carapace Length/Palpal Tibia Width ratio – males

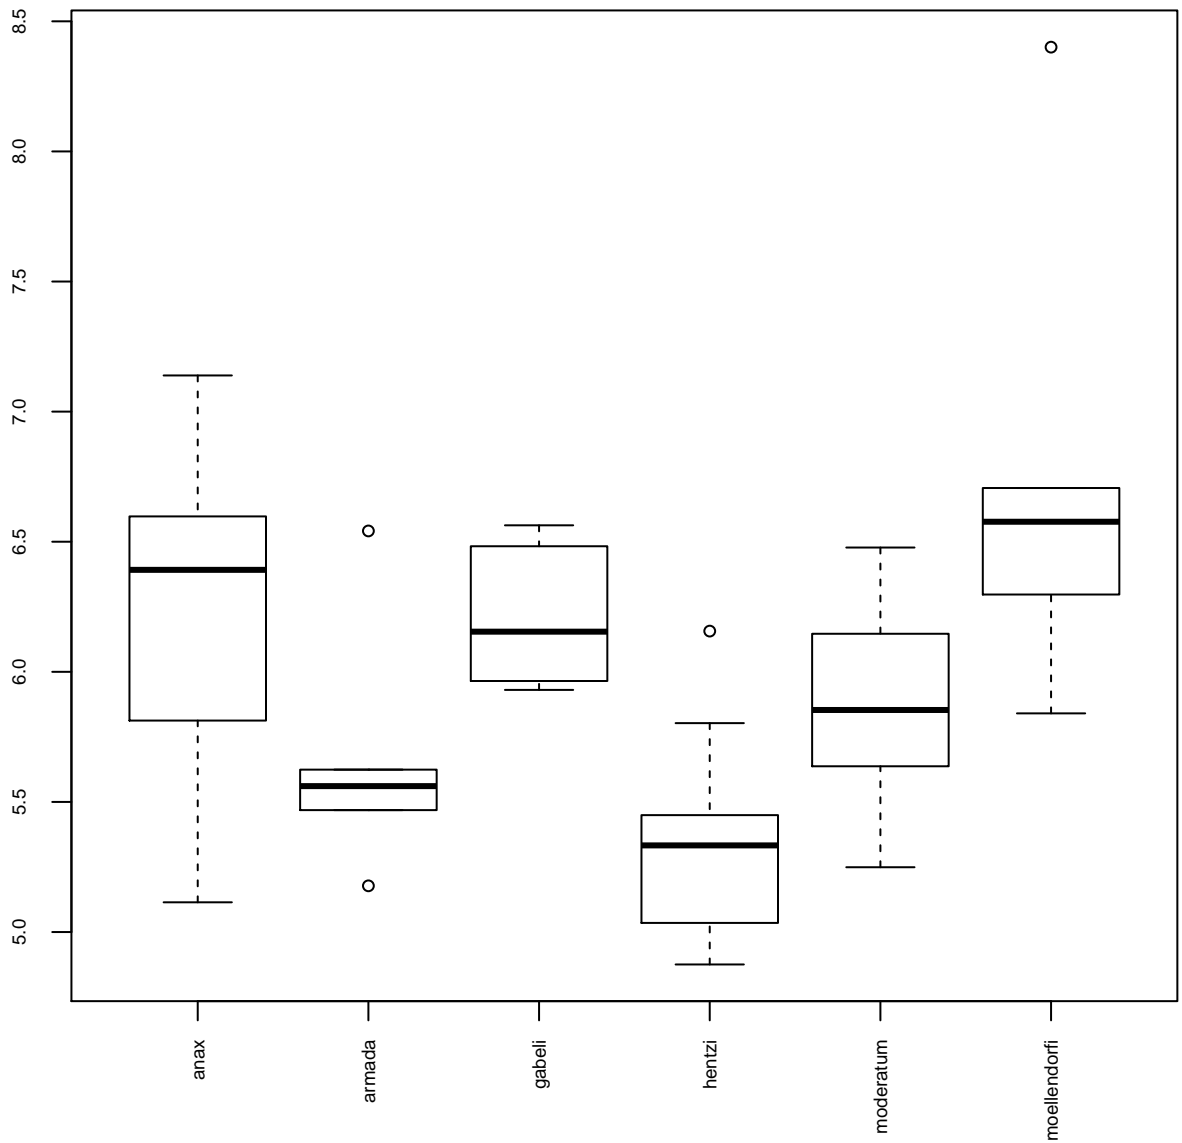

Supplement: Supplementary file 65

# Metatarsus 1/Femur 4 Length ratio – males

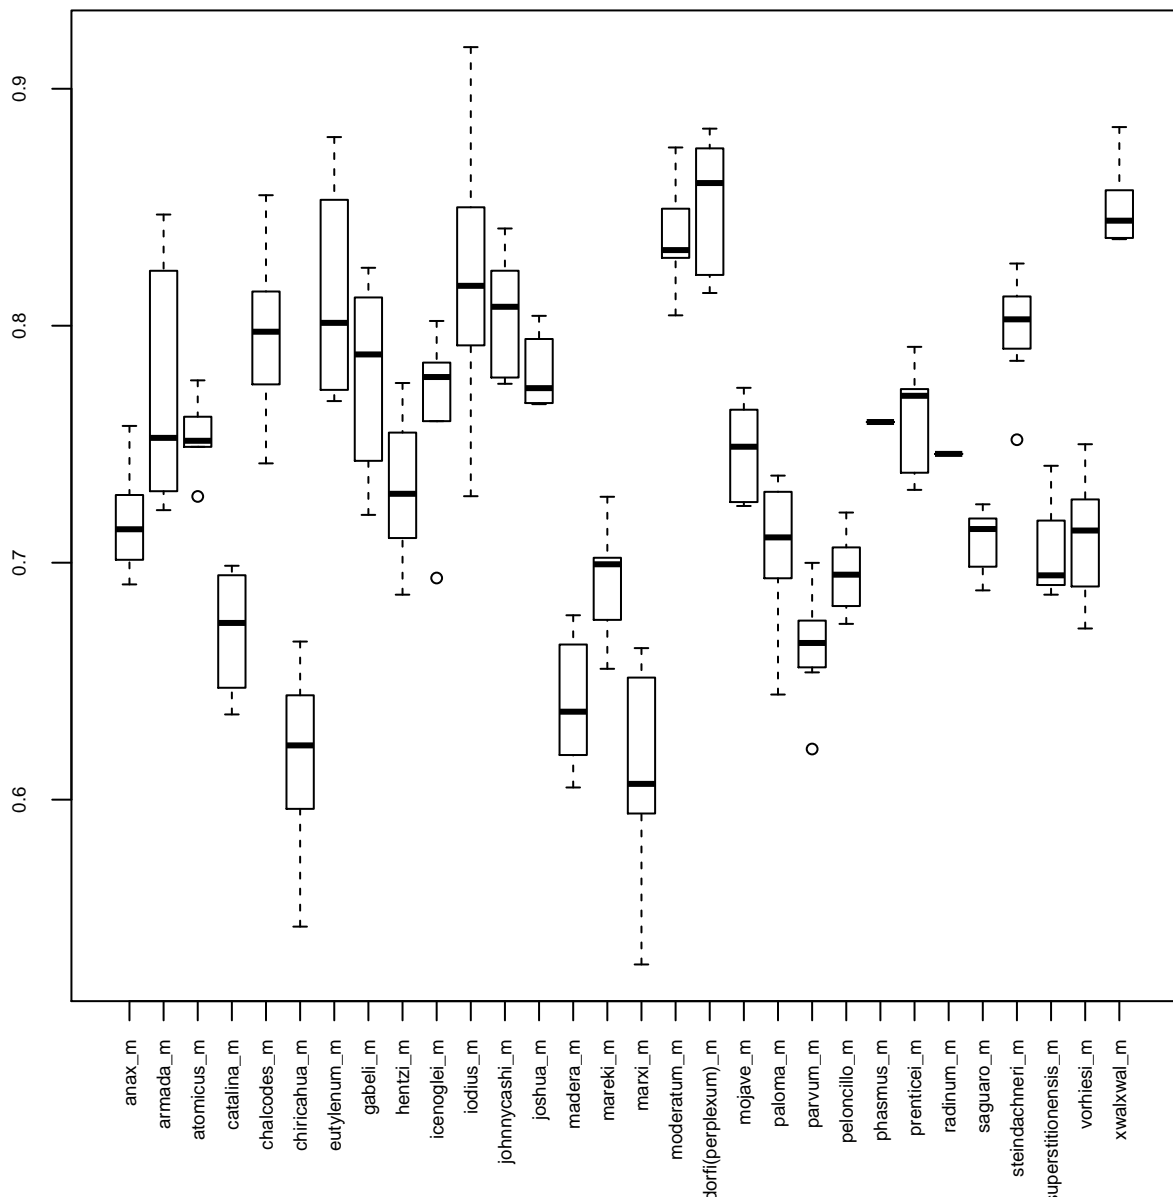

Supplement: Supplementary file 66

## Carapace Length/Metatarsus 1 ratio – males

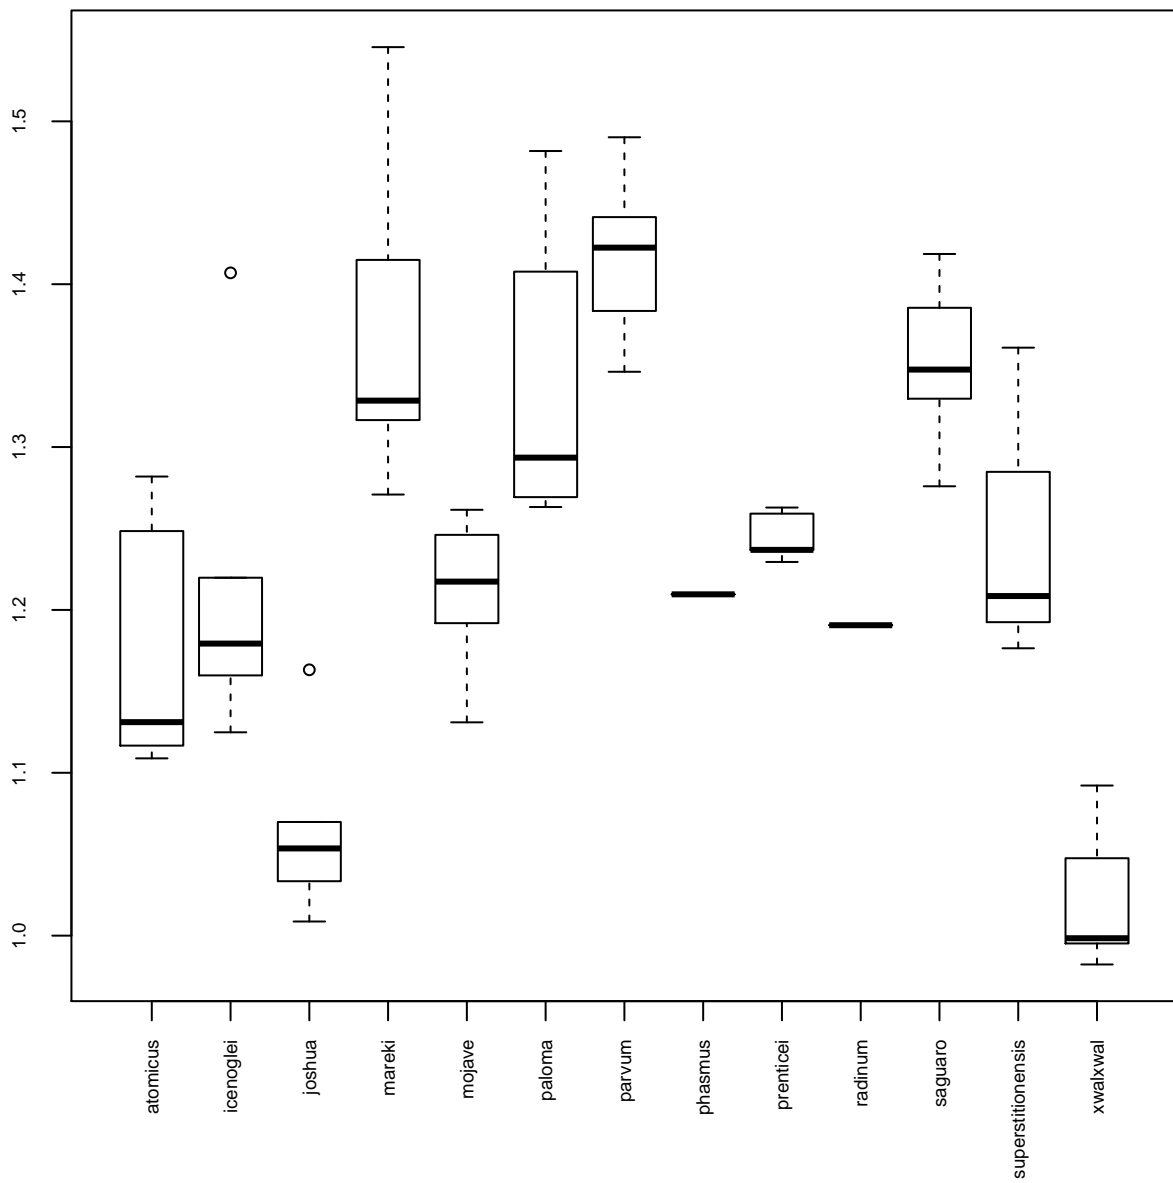

Supplement: Supplementary file 67

## Carapace Length/Metatarsus 4 ratio – females

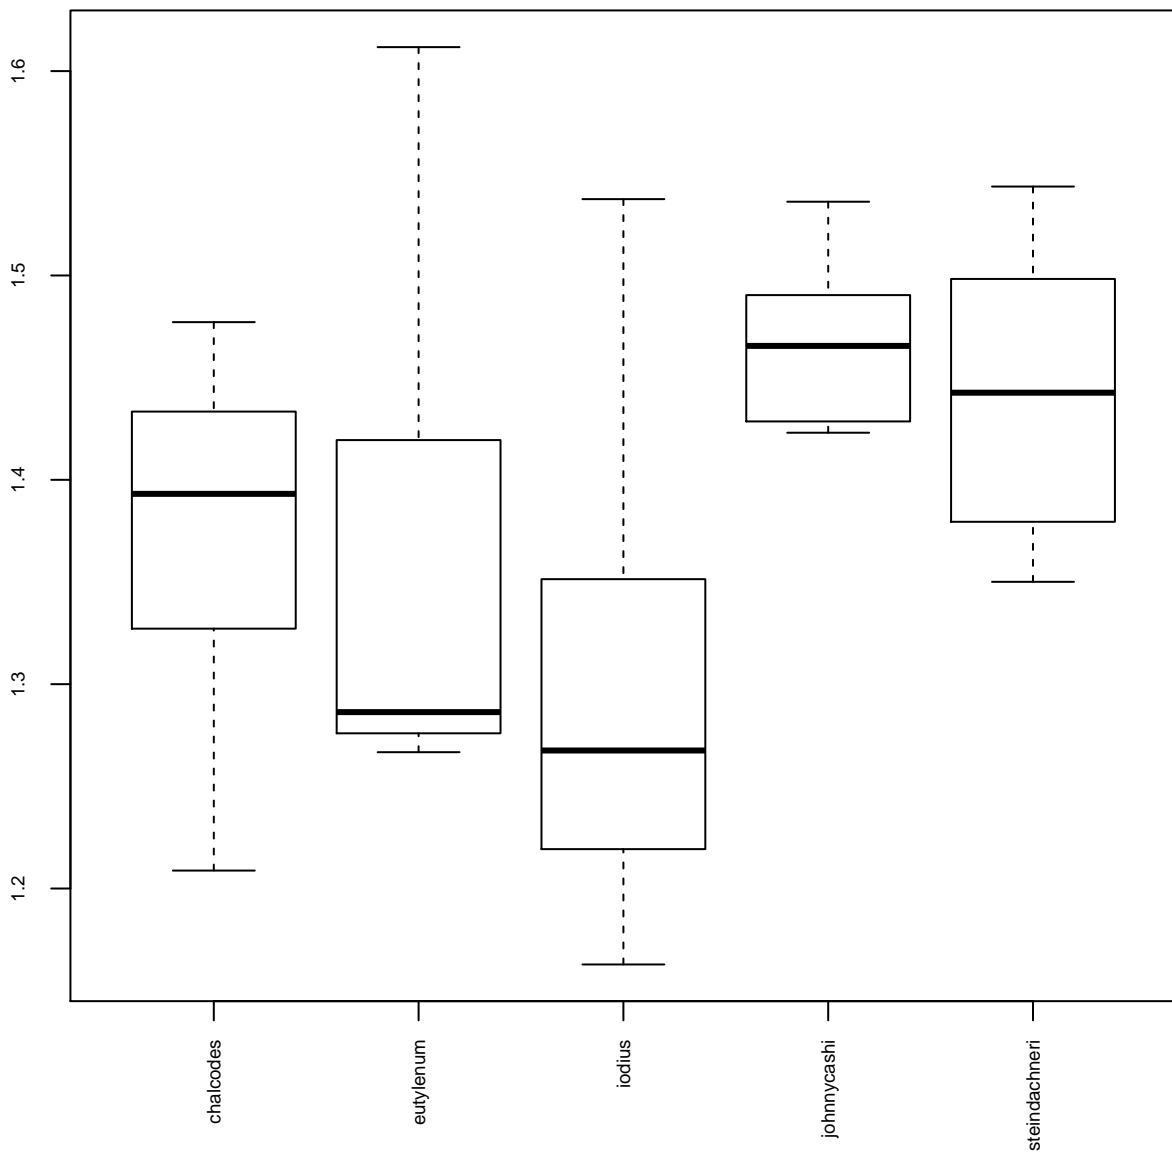

Supplement: Supplementary file 68

# Tibia 4/Tarsus 4 ratio – females

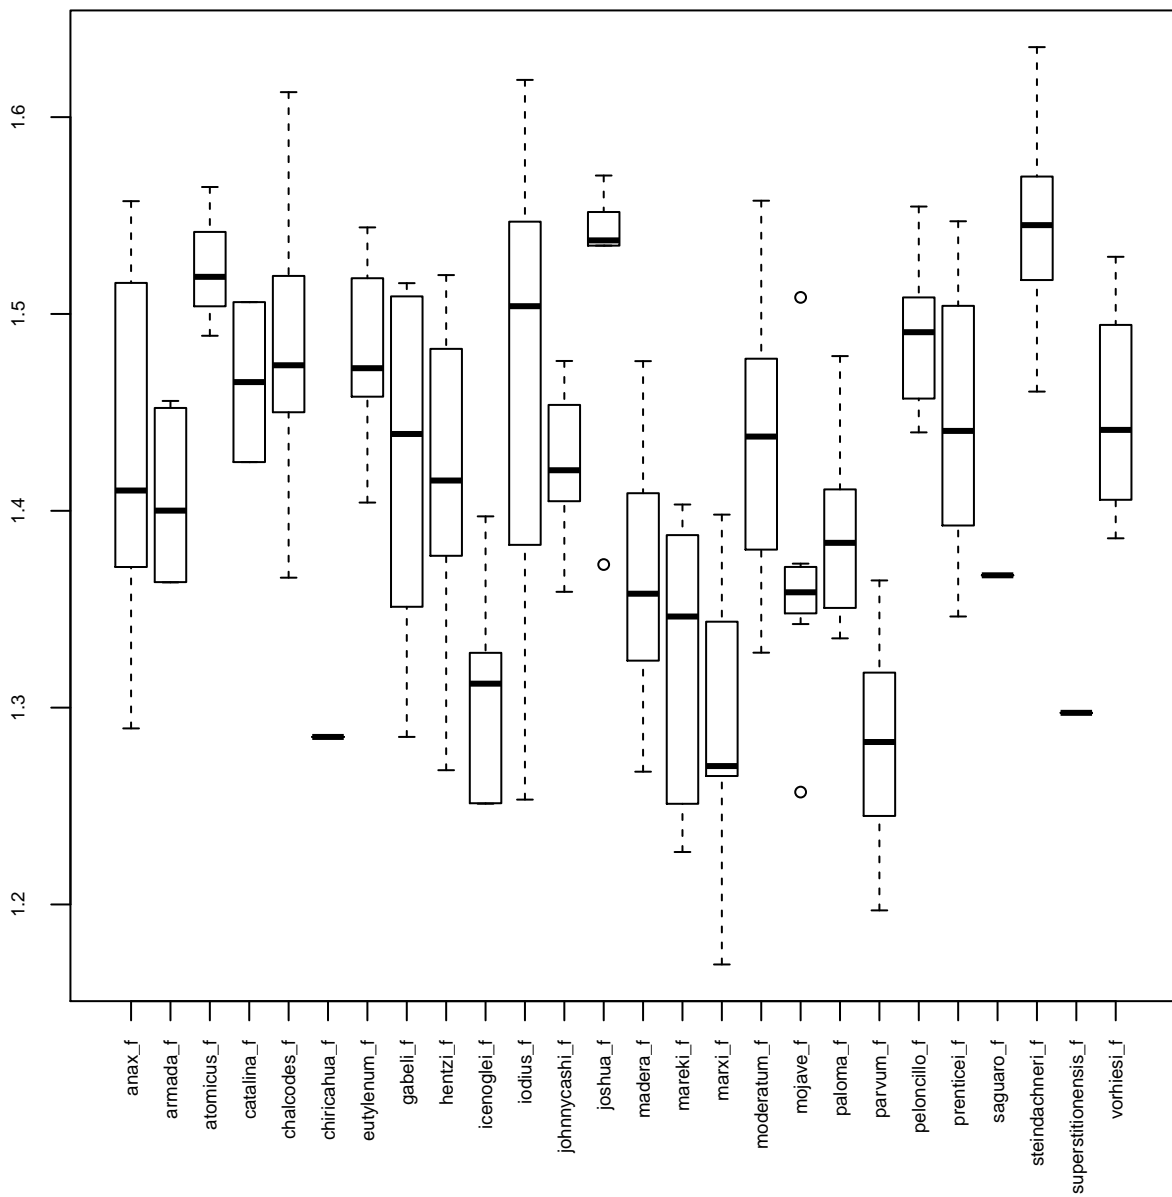

Supplement: Supplementary file 69

## Patella 3/Patella 4 ratio – males

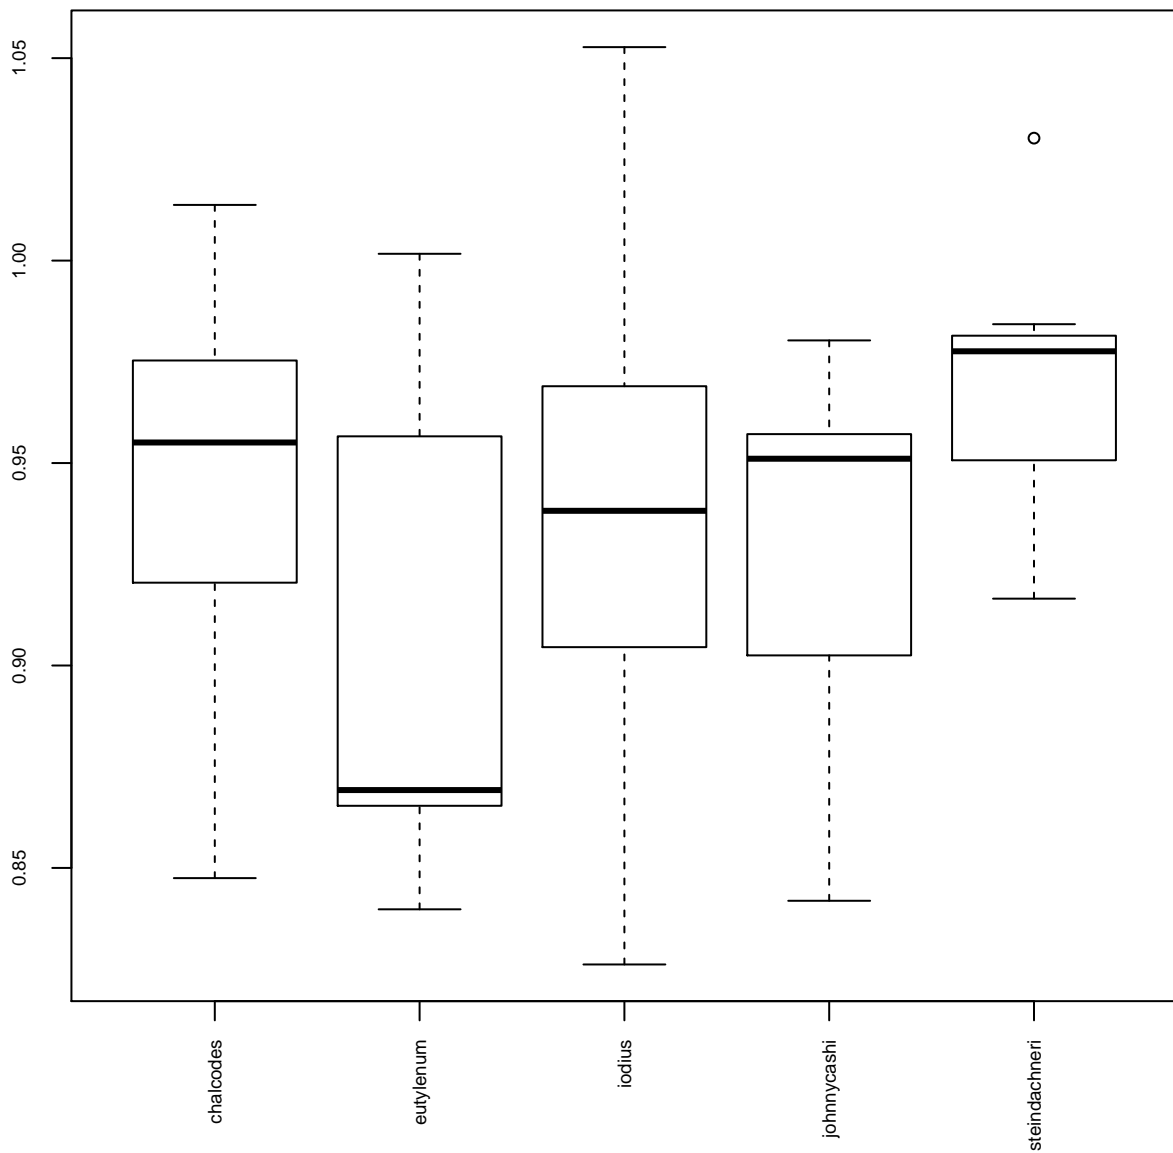

Supplement: Supplementary file 70

## Femur 4/Tibia 4 ratio – females

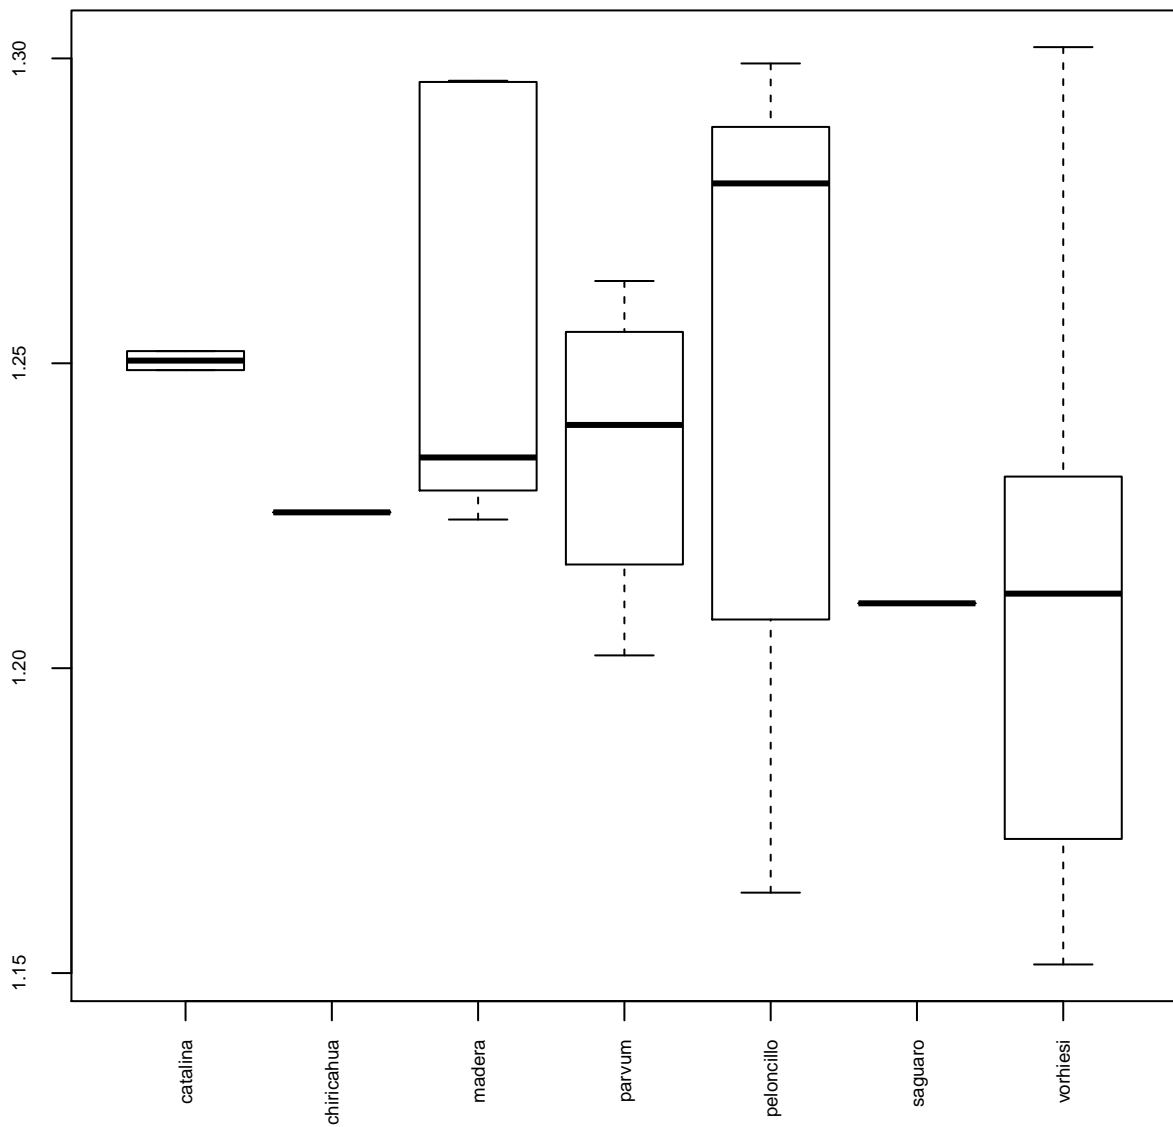

Supplement: Supplementary file 71

# Carapace Length/Tibia 4 ratio – males

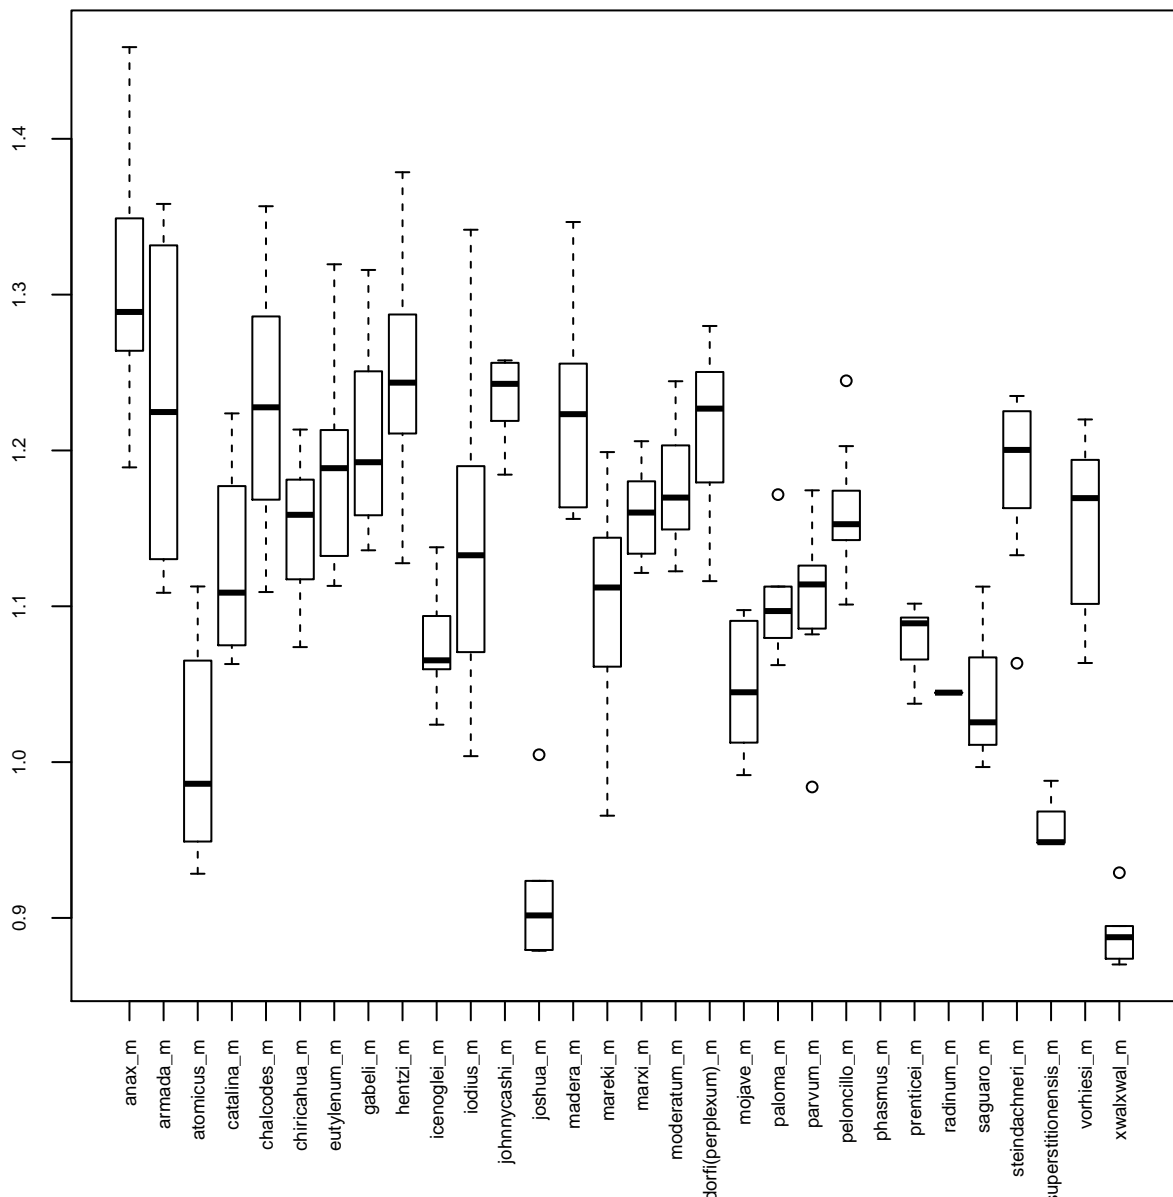

Supplement: Supplementary file 72

## Carapace Length/Patella 1 ratio – males

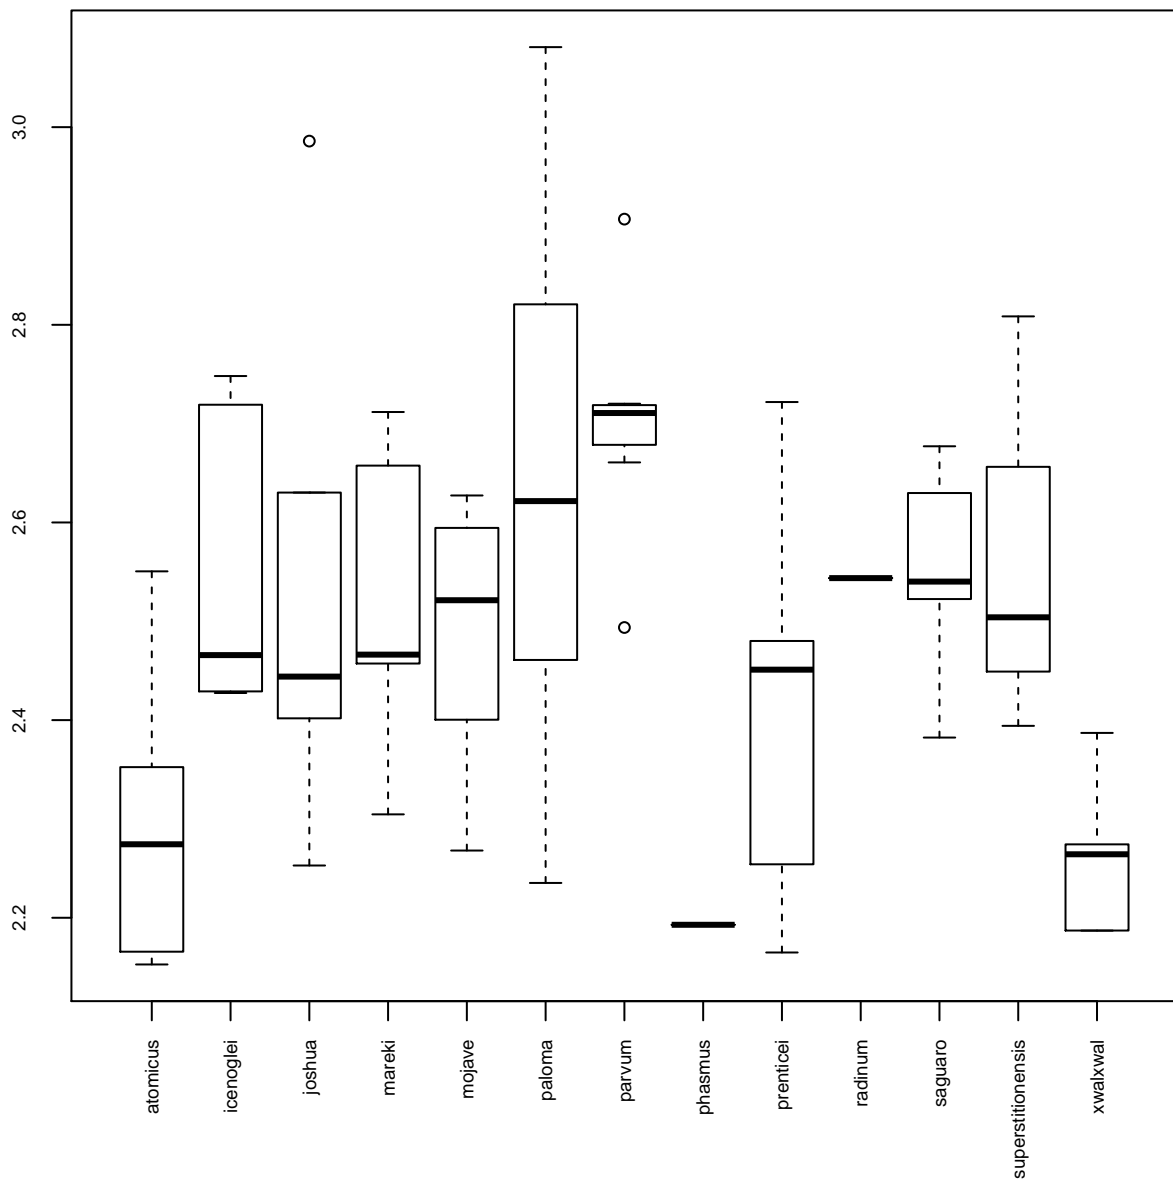

Supplement: Supplementary file 73

# Metatarsus 3/Patella 4 Length ratio – males

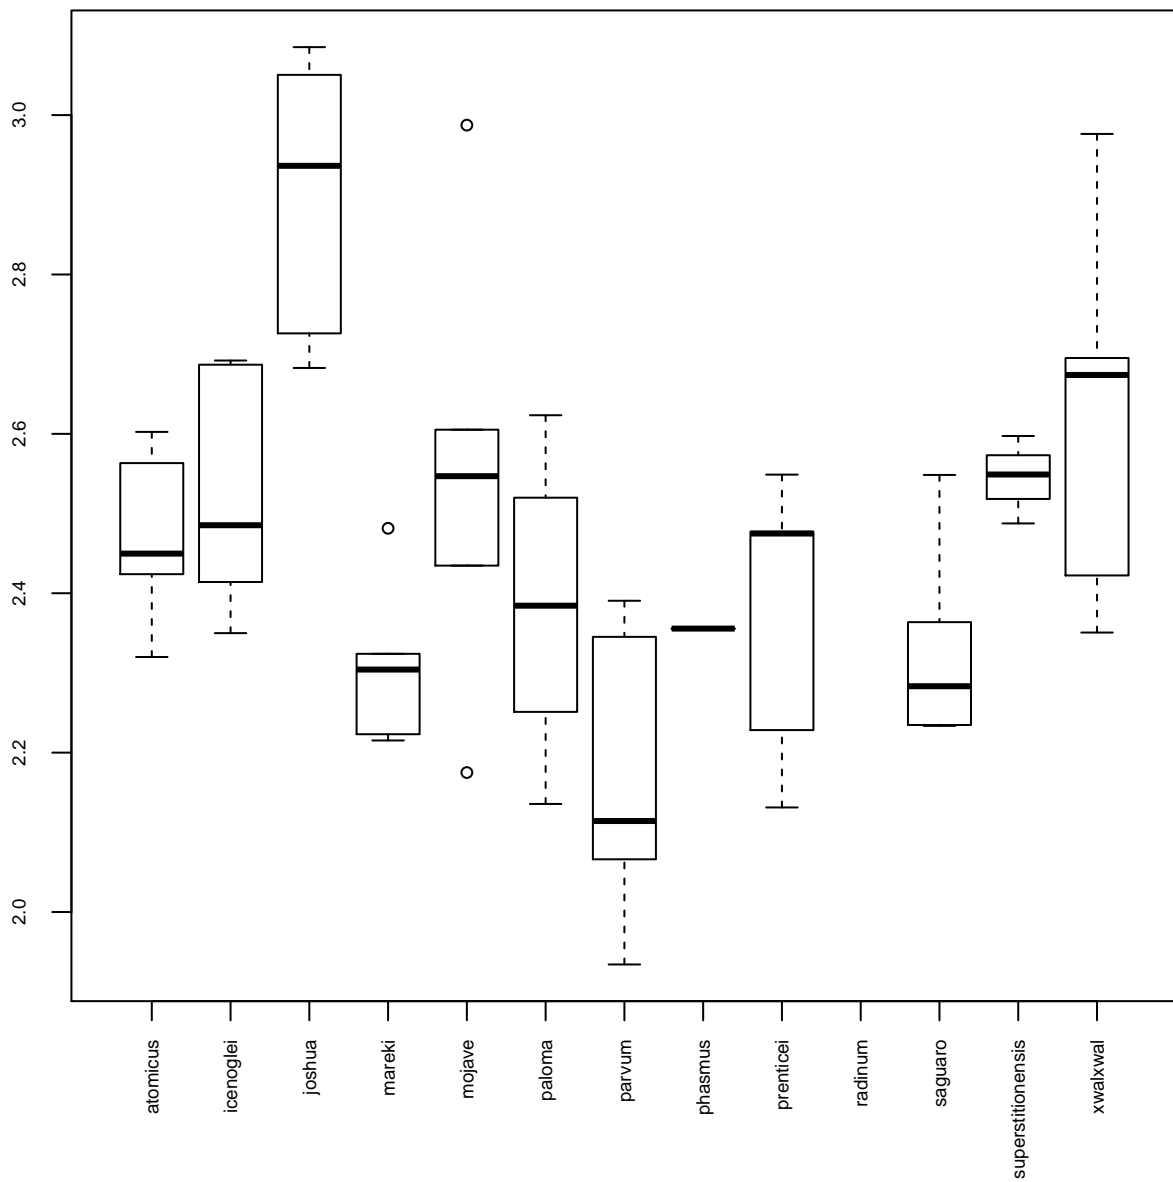

Supplement: Supplementary file 74

## Femur 3/Metatarsus 3 ratio – females

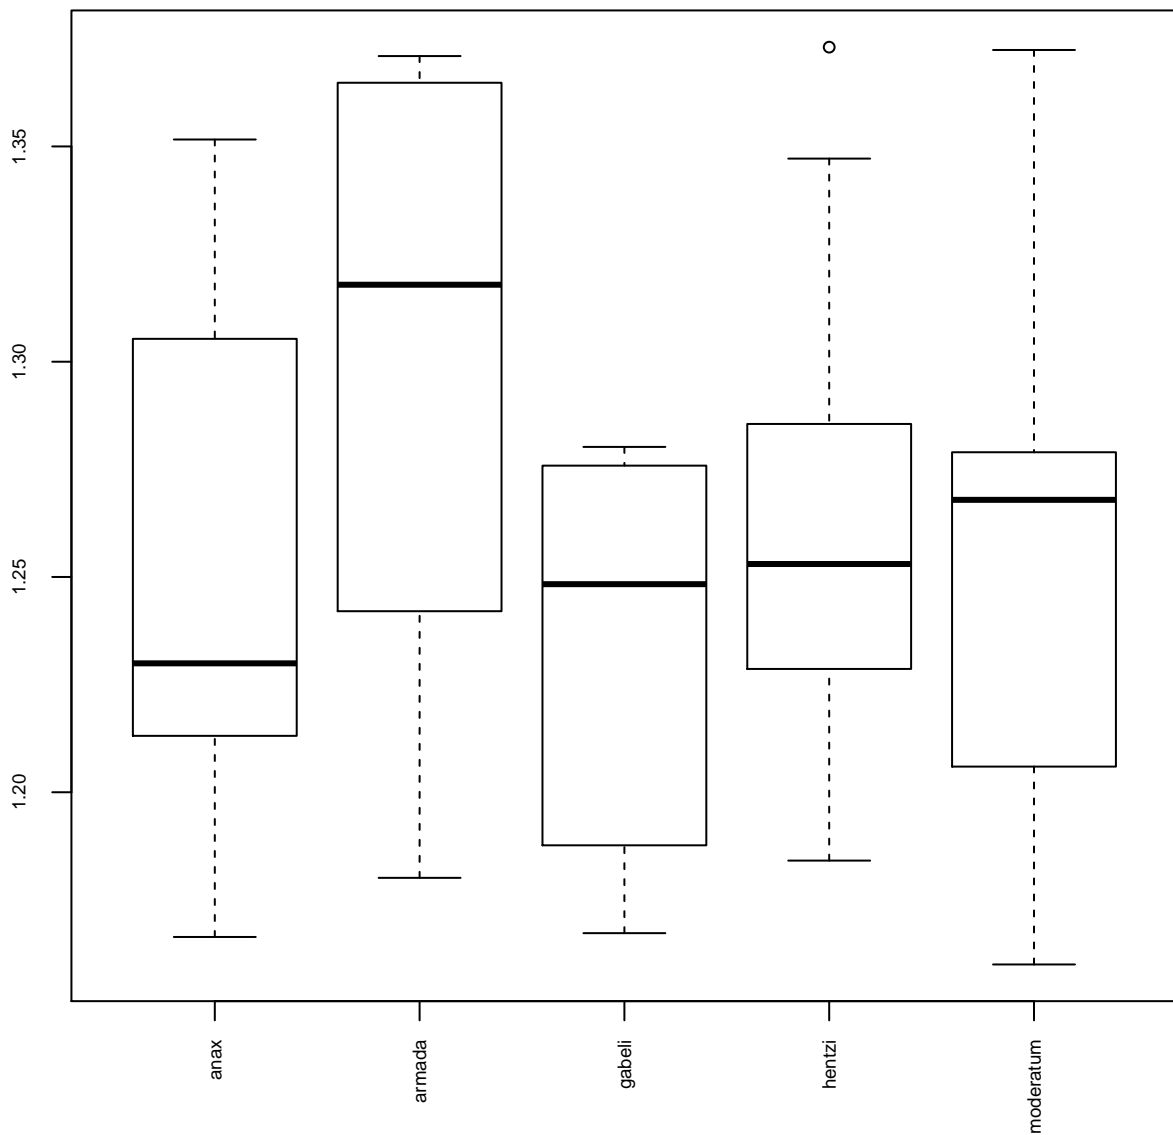

Supplement: Supplementary file 75

## Tibia 1/Patella 3 Length ratio – females

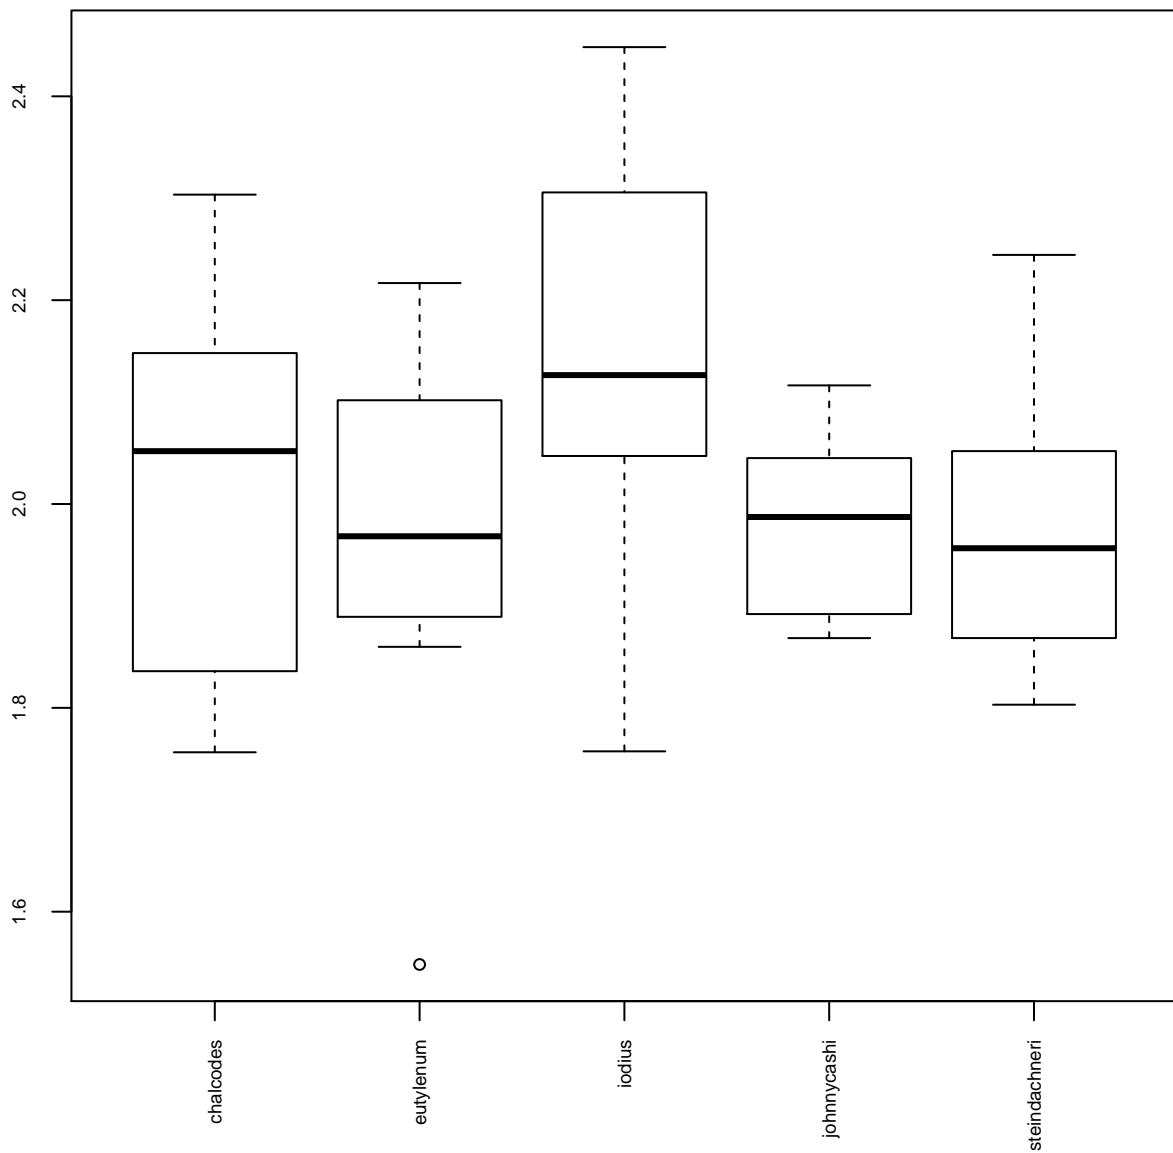

Supplement: Supplementary file 76

## Femur 1/Patella 1 ratio – females

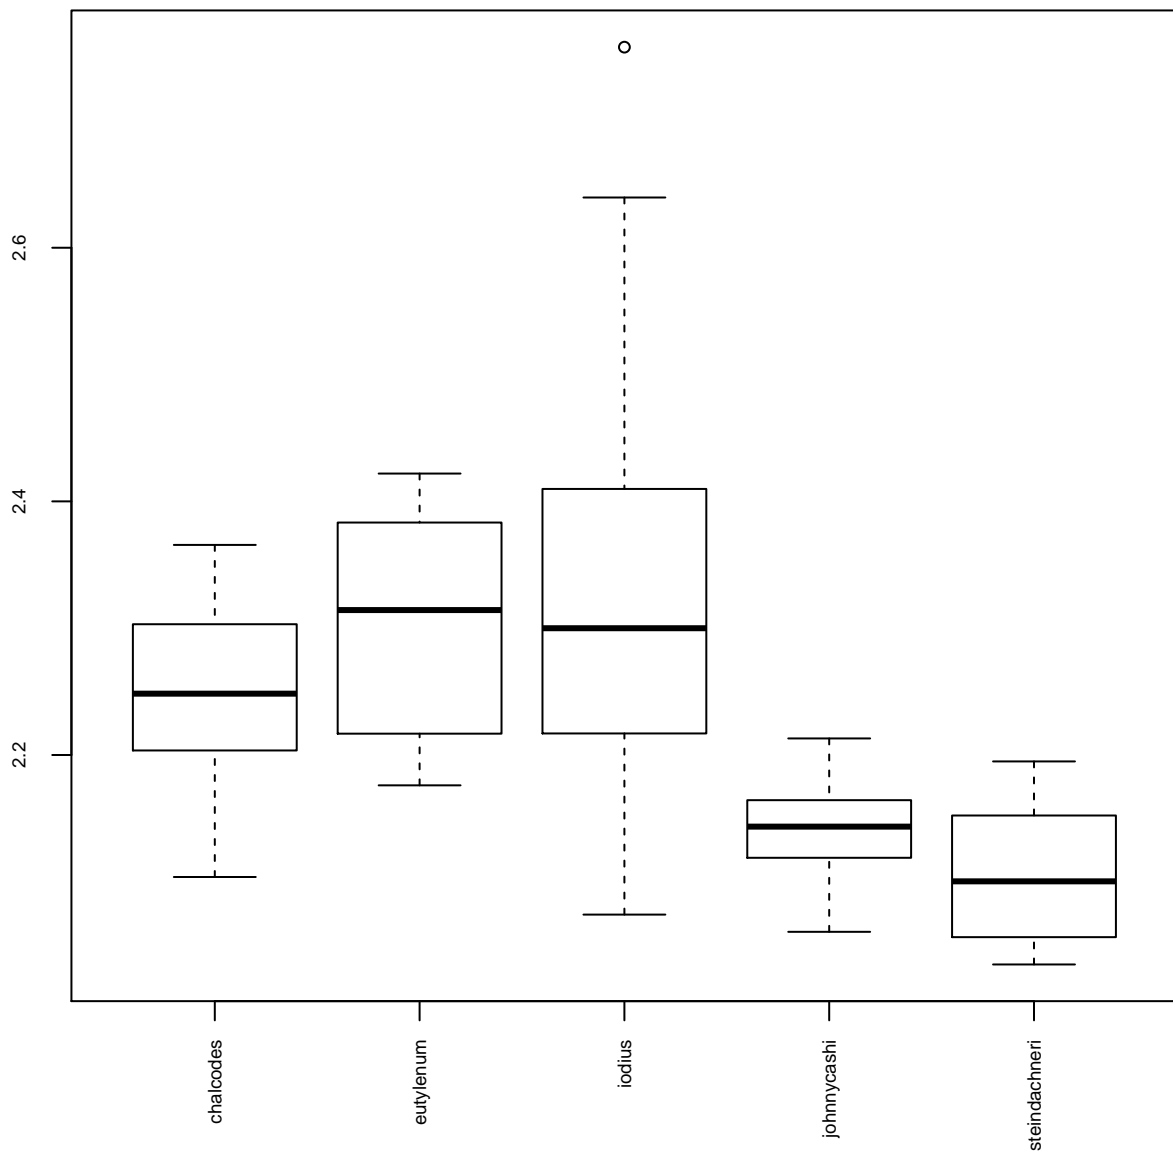

Supplement: Supplementary file 77

## Metatarsus 3/Patella 4 Length ratio – males

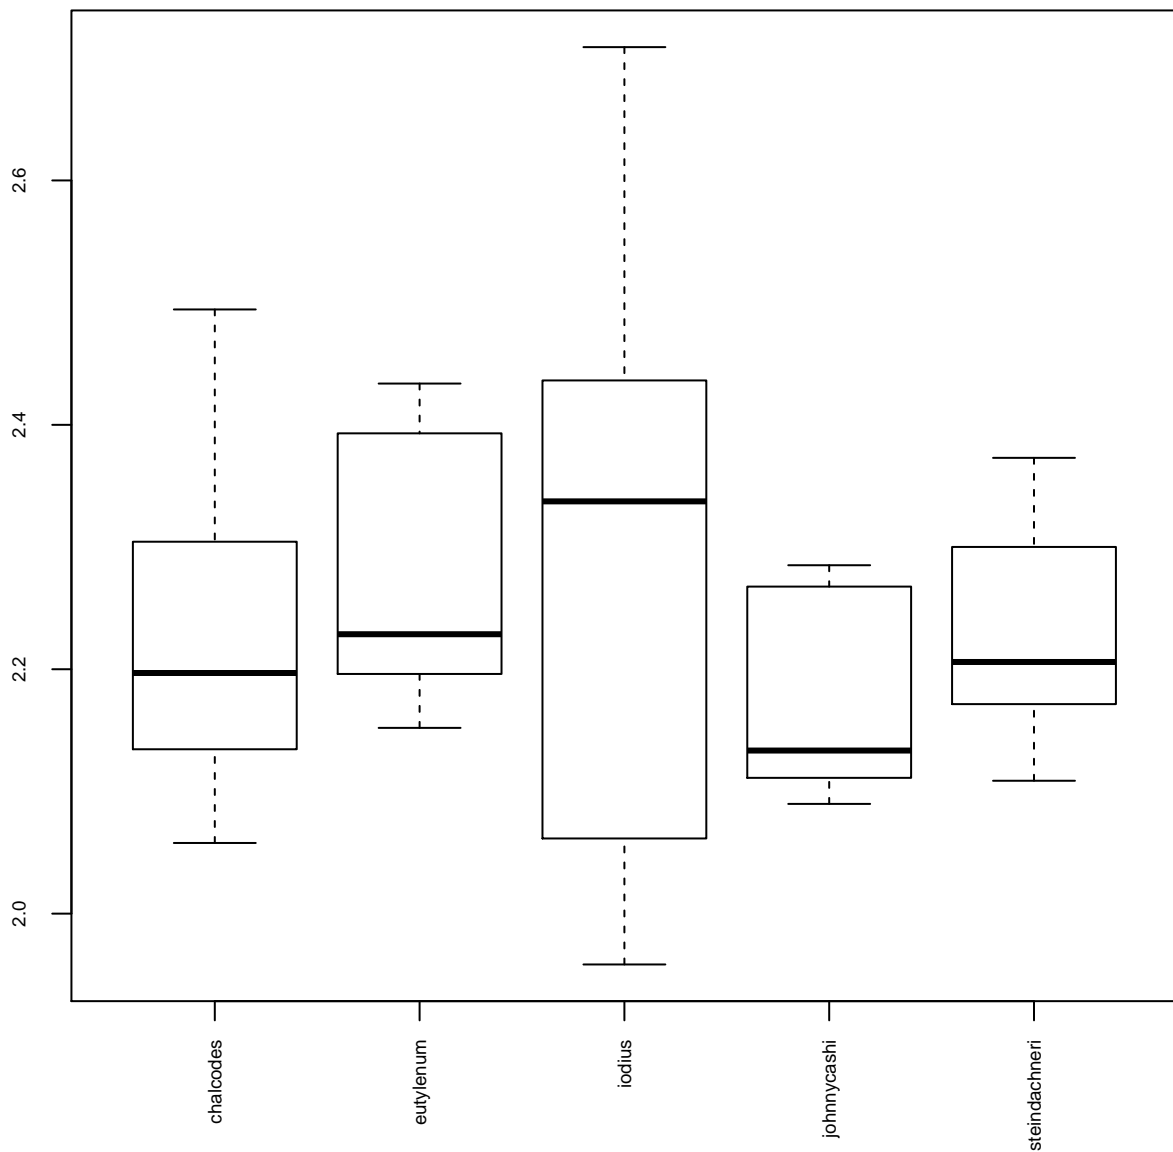

Supplement: Supplementary file 78

## Carapace Length/Metatarsus 4 ratio – females

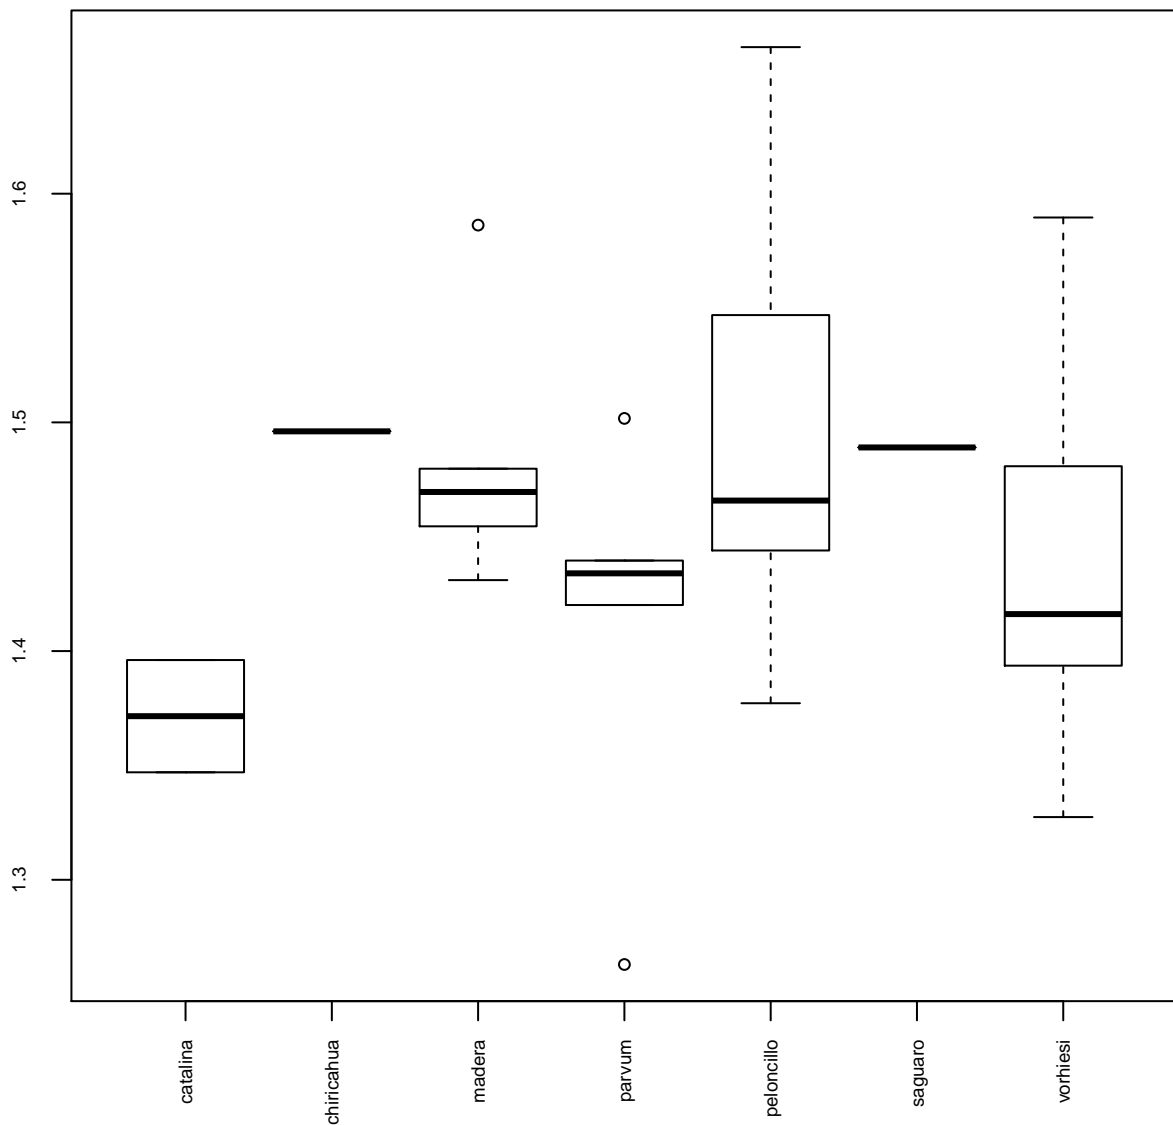

Supplement: Supplementary file 79

## Femur 4/Metatarsus 4 ratio – males

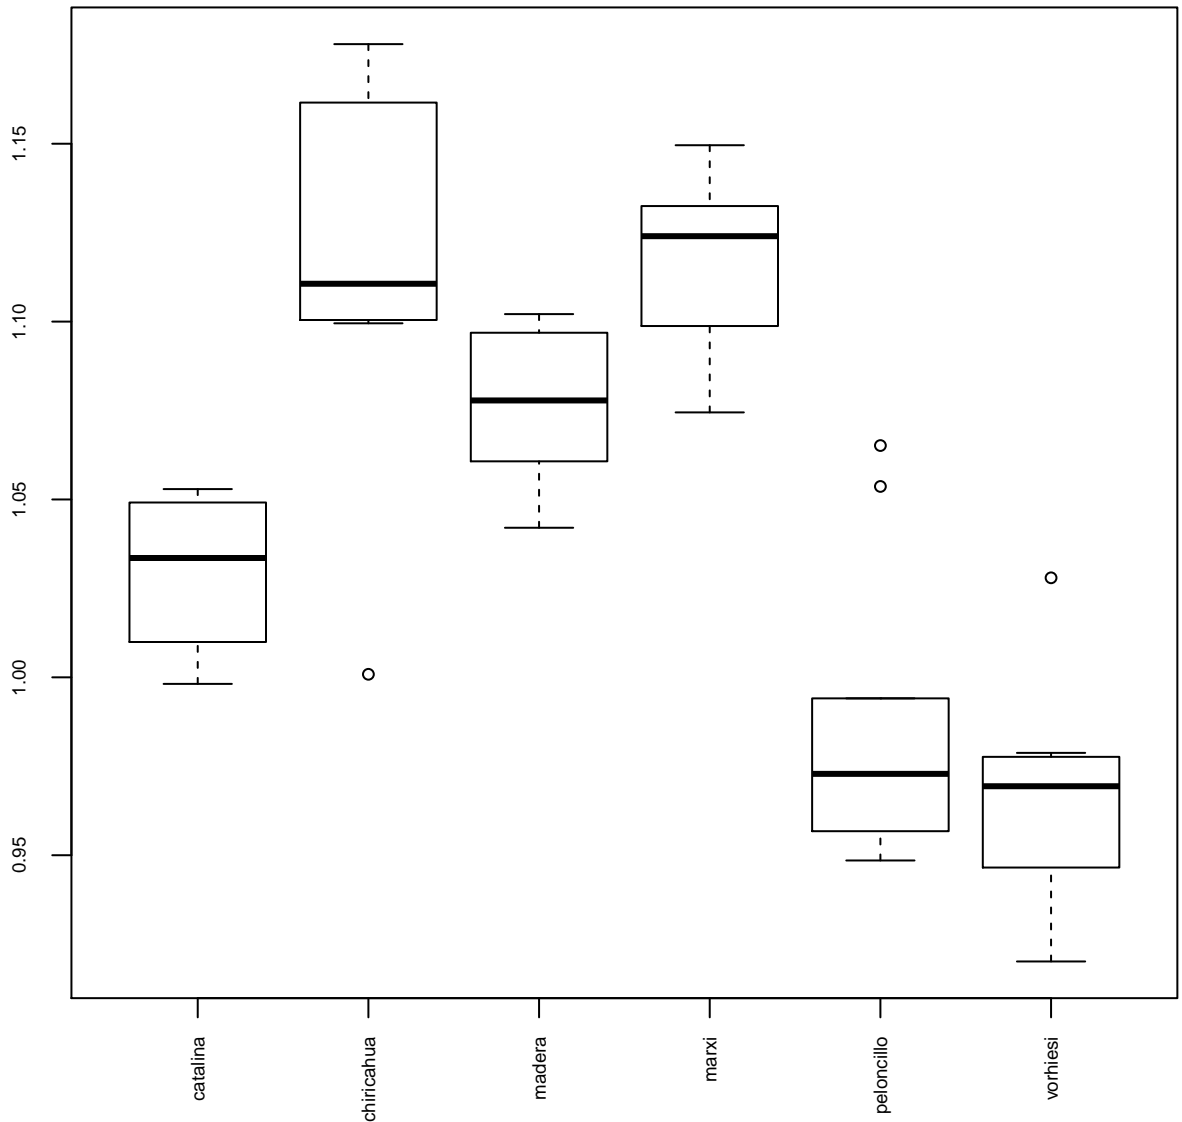

Supplement: Supplementary file 80

## Carapace Length/Metatarsus 1 ratio – males

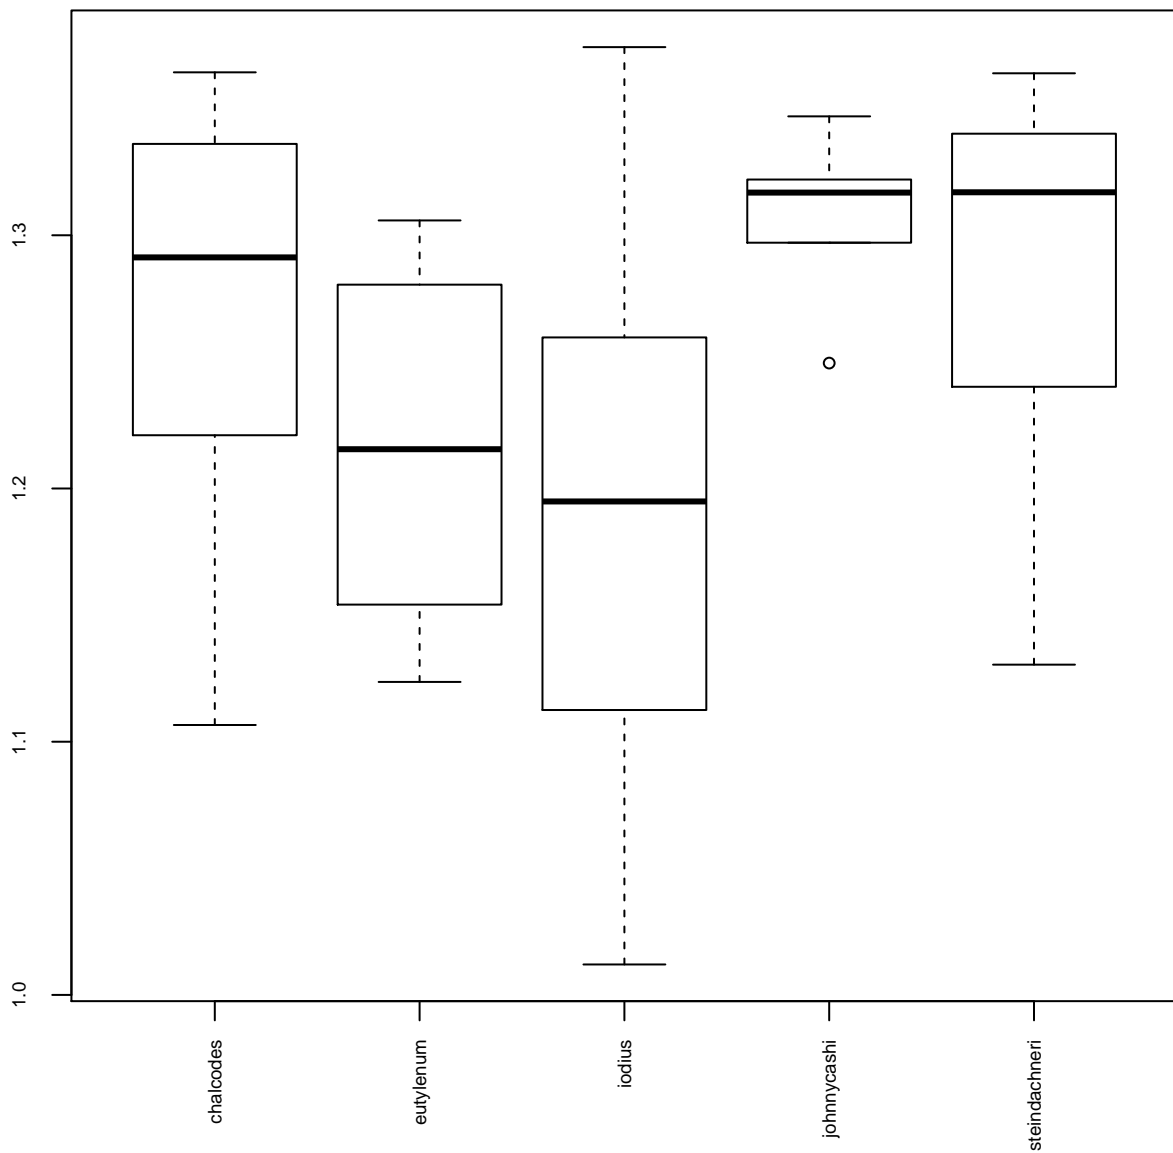

Supplement: Supplementary file 81

## Leg 1 Length/Carapace Length ratio – females

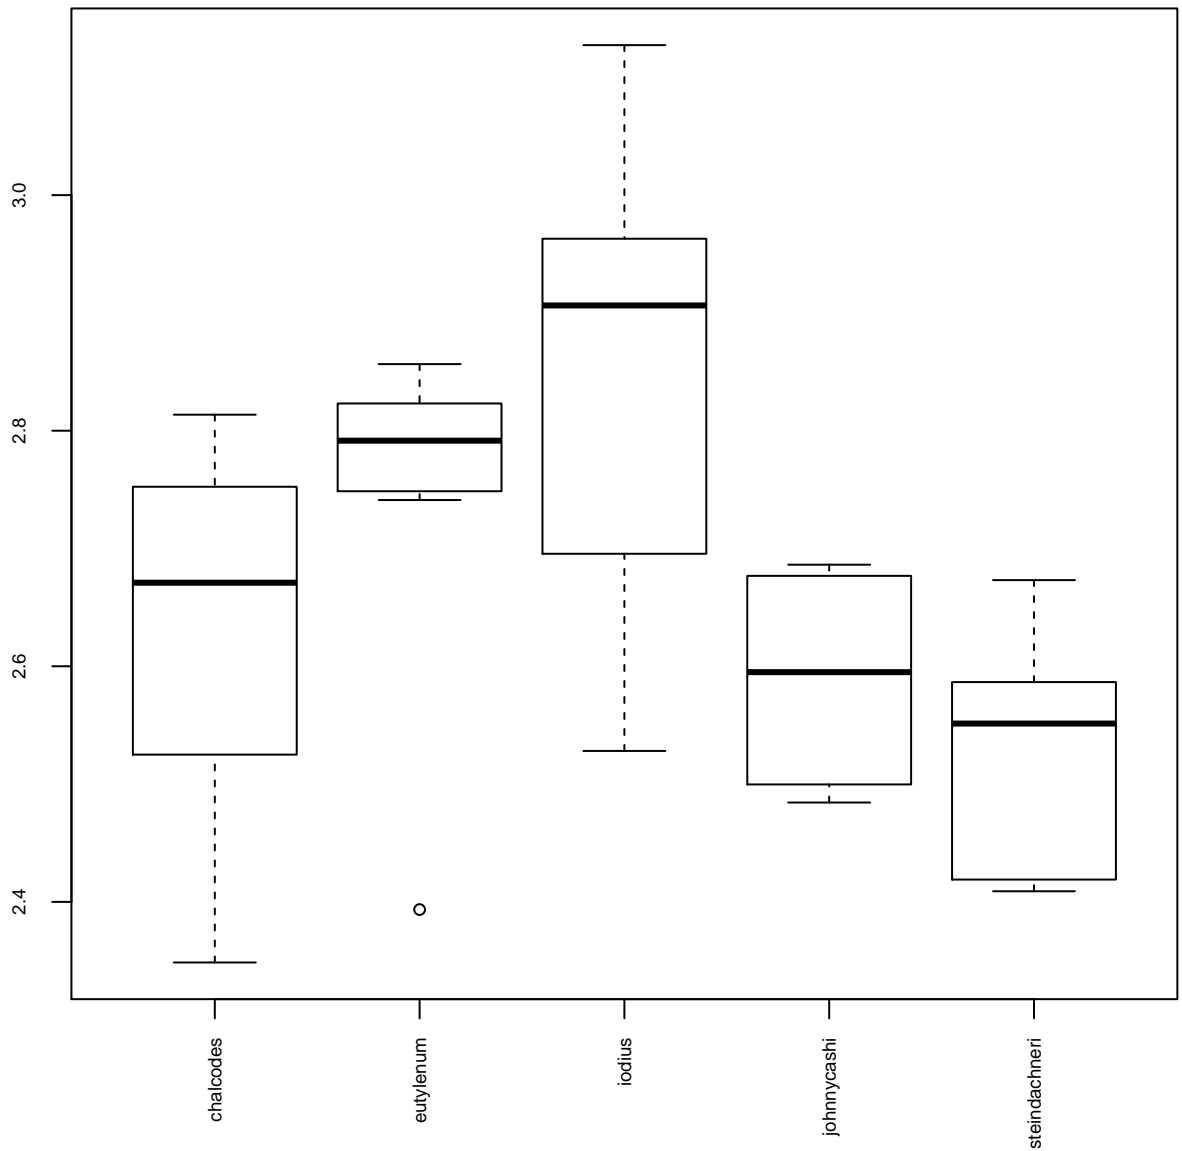

Supplement: Supplementary file 82

## Femur 1/Tarsus 1 ratio – males

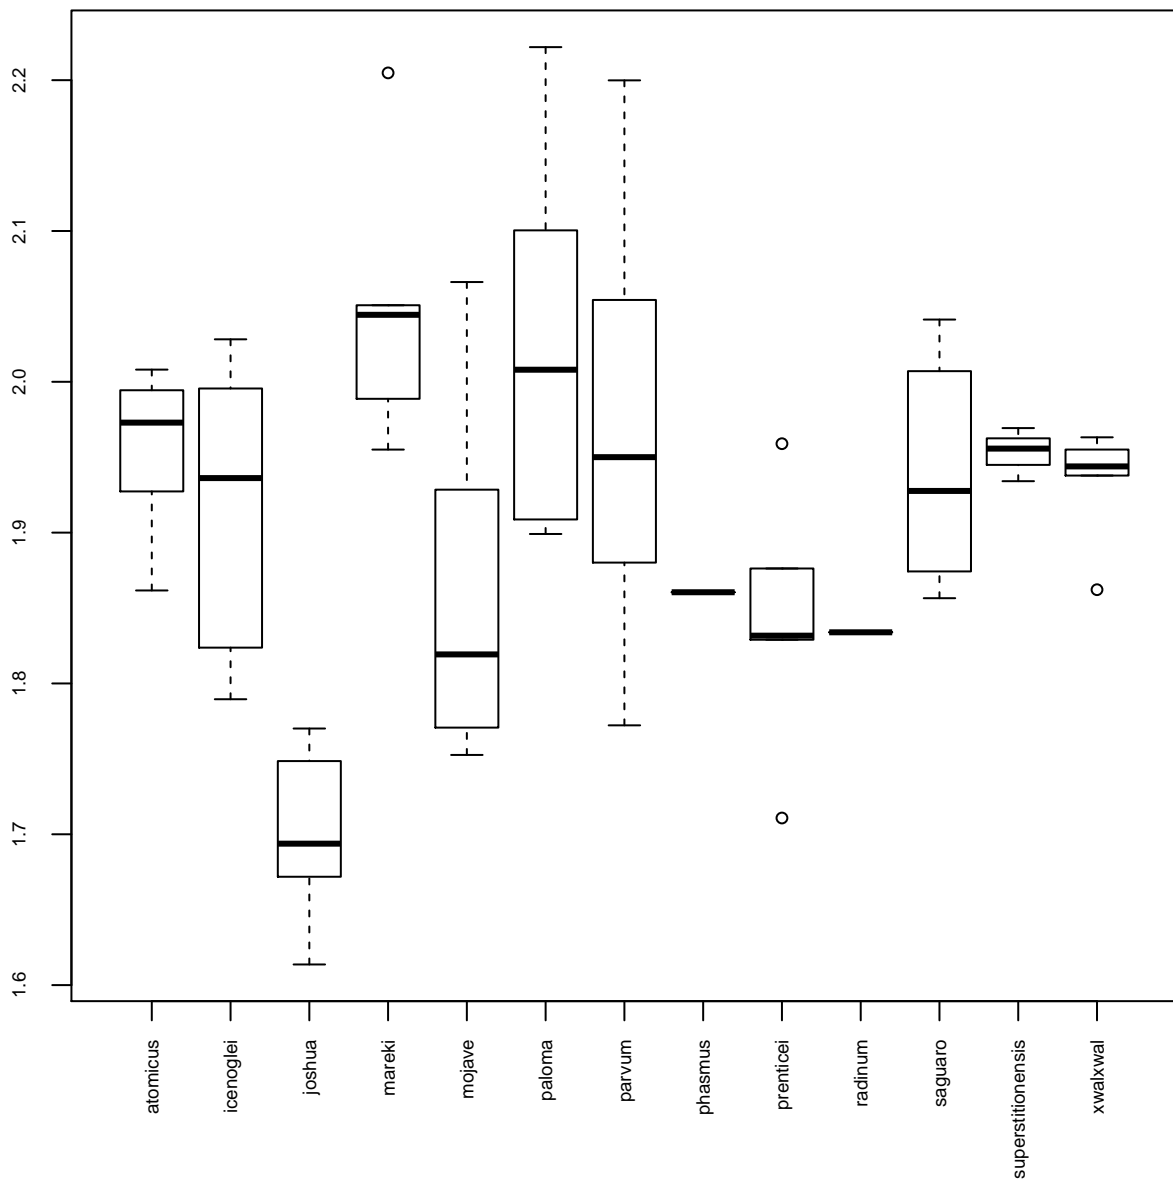

Supplement: Supplementary file 83

## Tarsus 3/Metatarsus 4 Length ratio – females

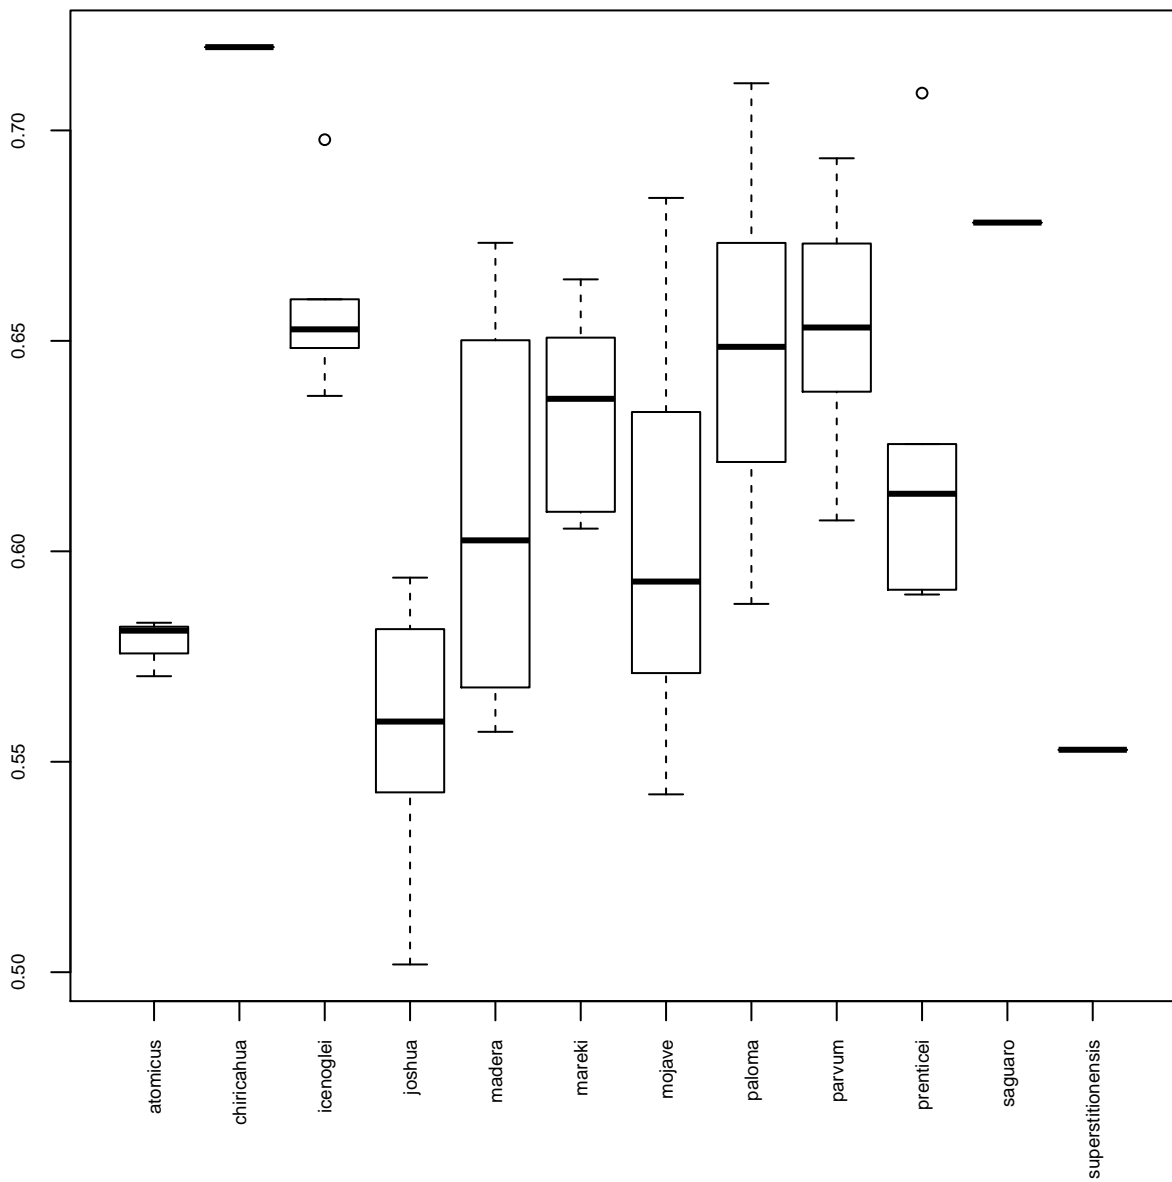

Supplement: Supplementary file 84

## Femur 1/Tarsus 4 ratio – females

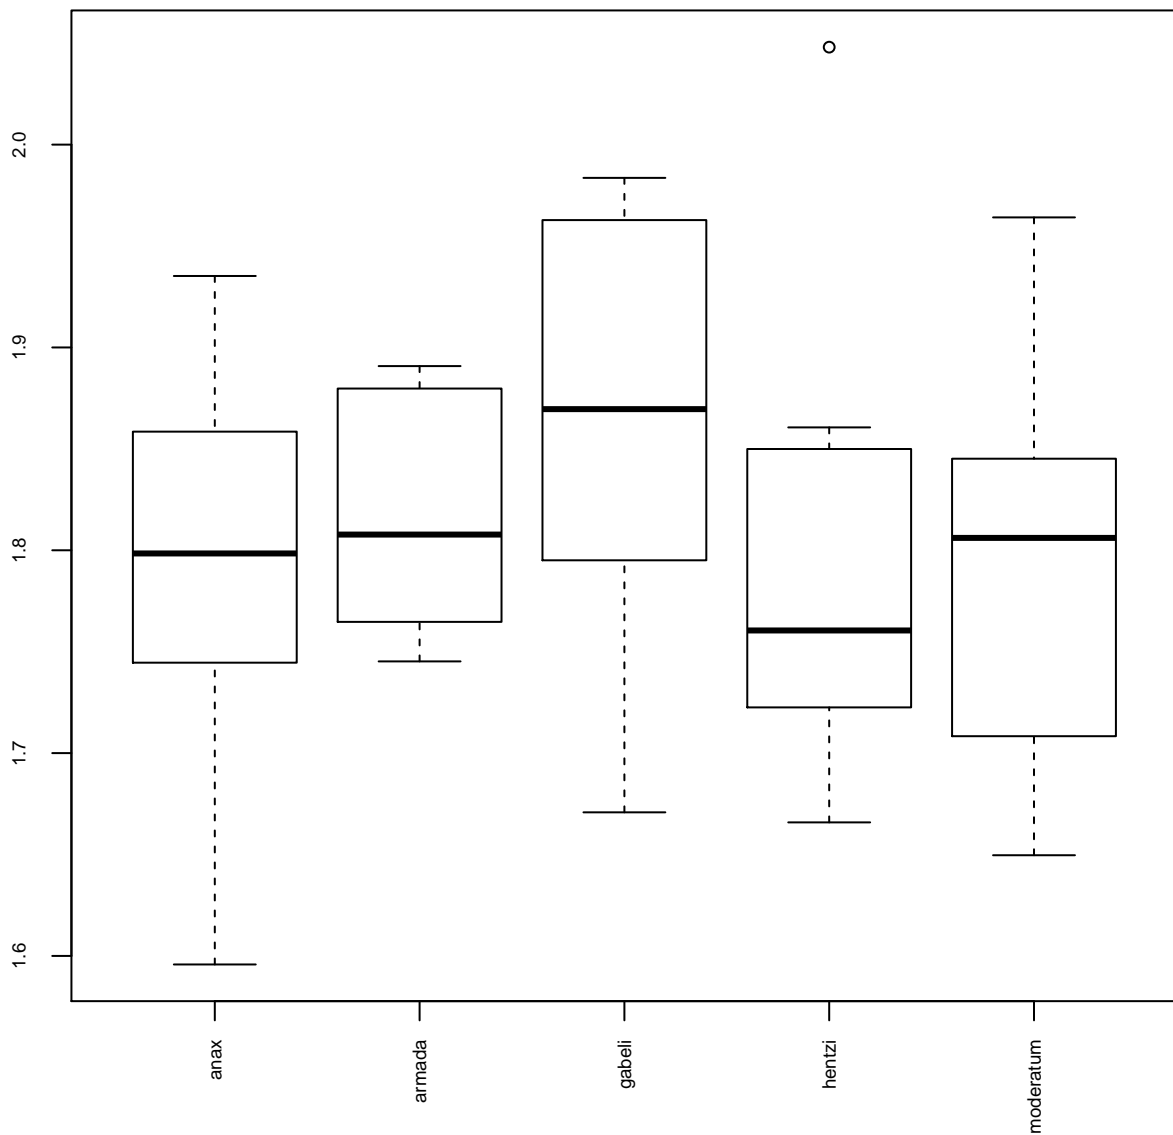

Supplement: Supplementary file 85

# Tibia 1/Metatarsus 3 Length ratio – males

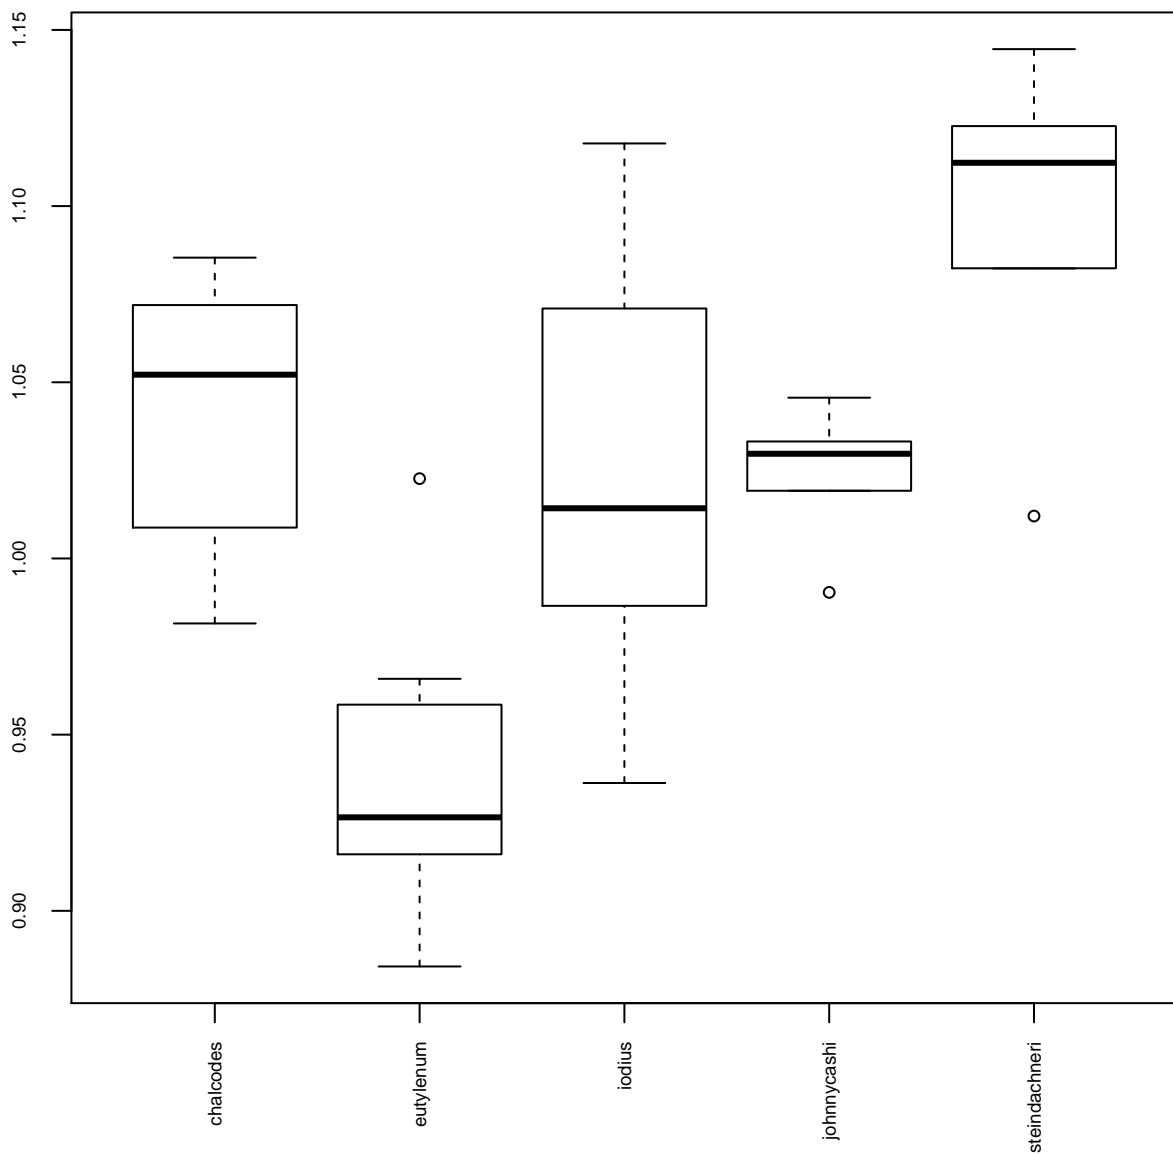

Supplement: Supplementary file 86

# Femur 1/Tarsus 3 ratio – males

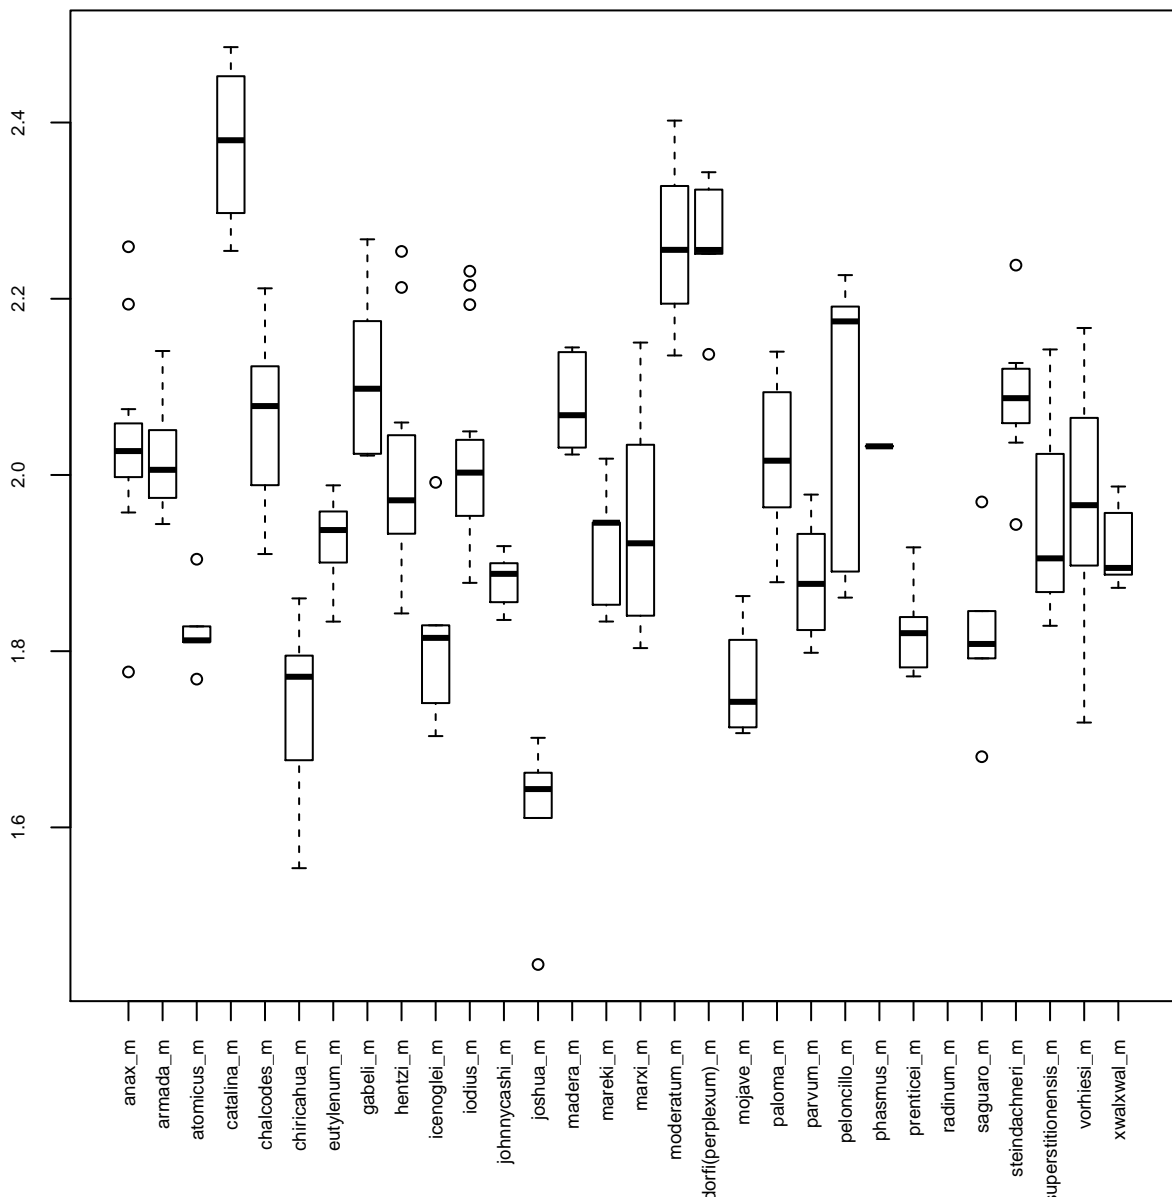

Supplement: Supplementary file 87

# Patella 3/Tarsus 3 ratio – males

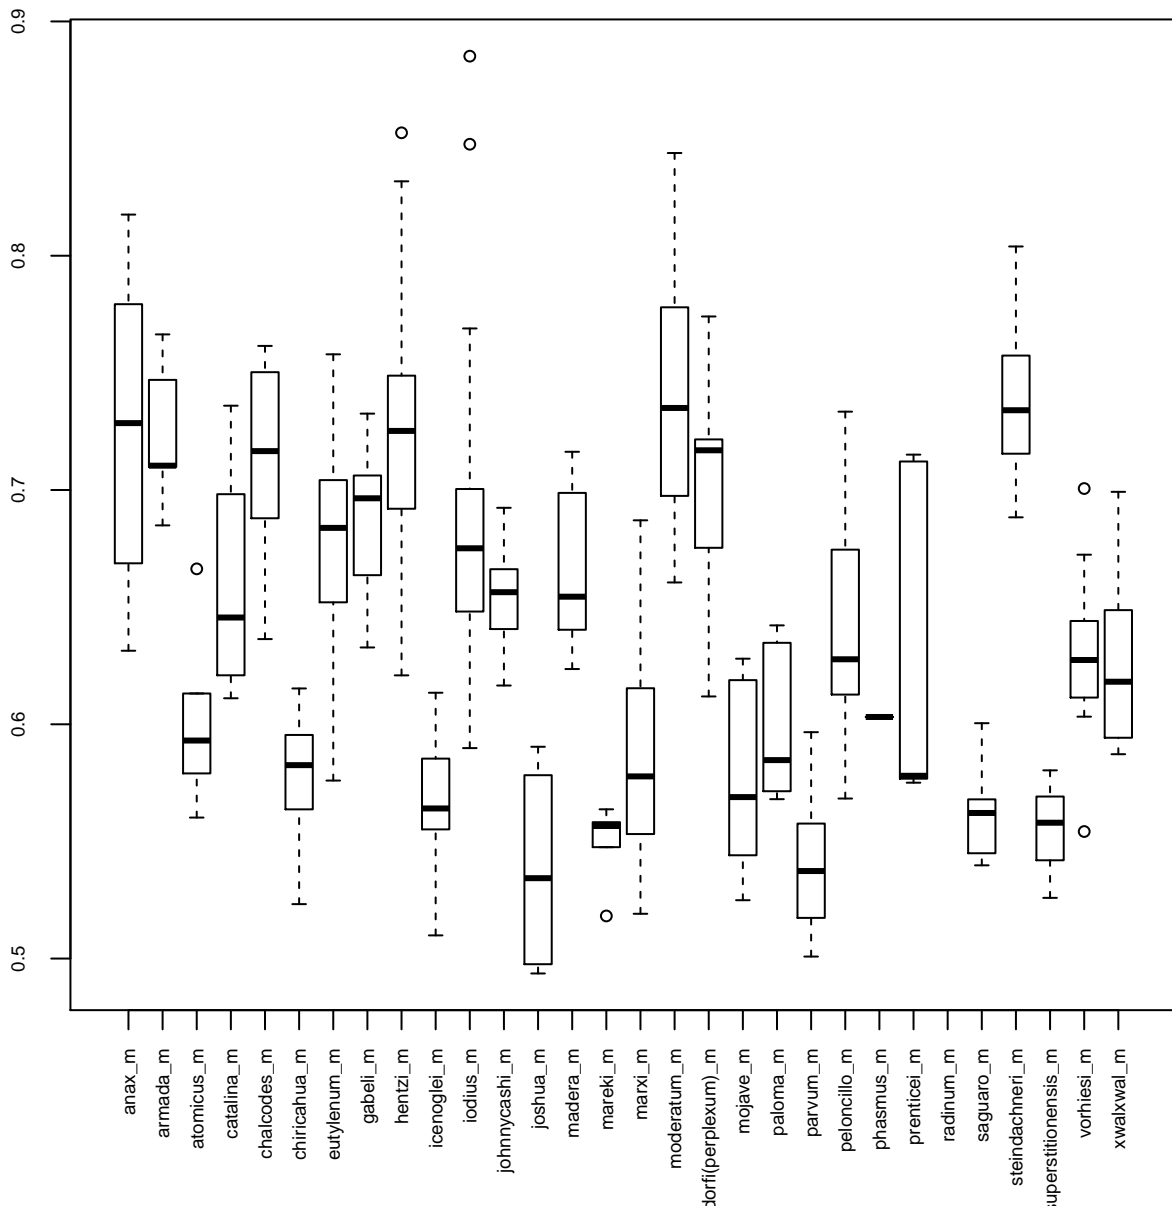

Supplement: Supplementary file 88

## Tibia 1/Tarsus 4 Length ratio – females

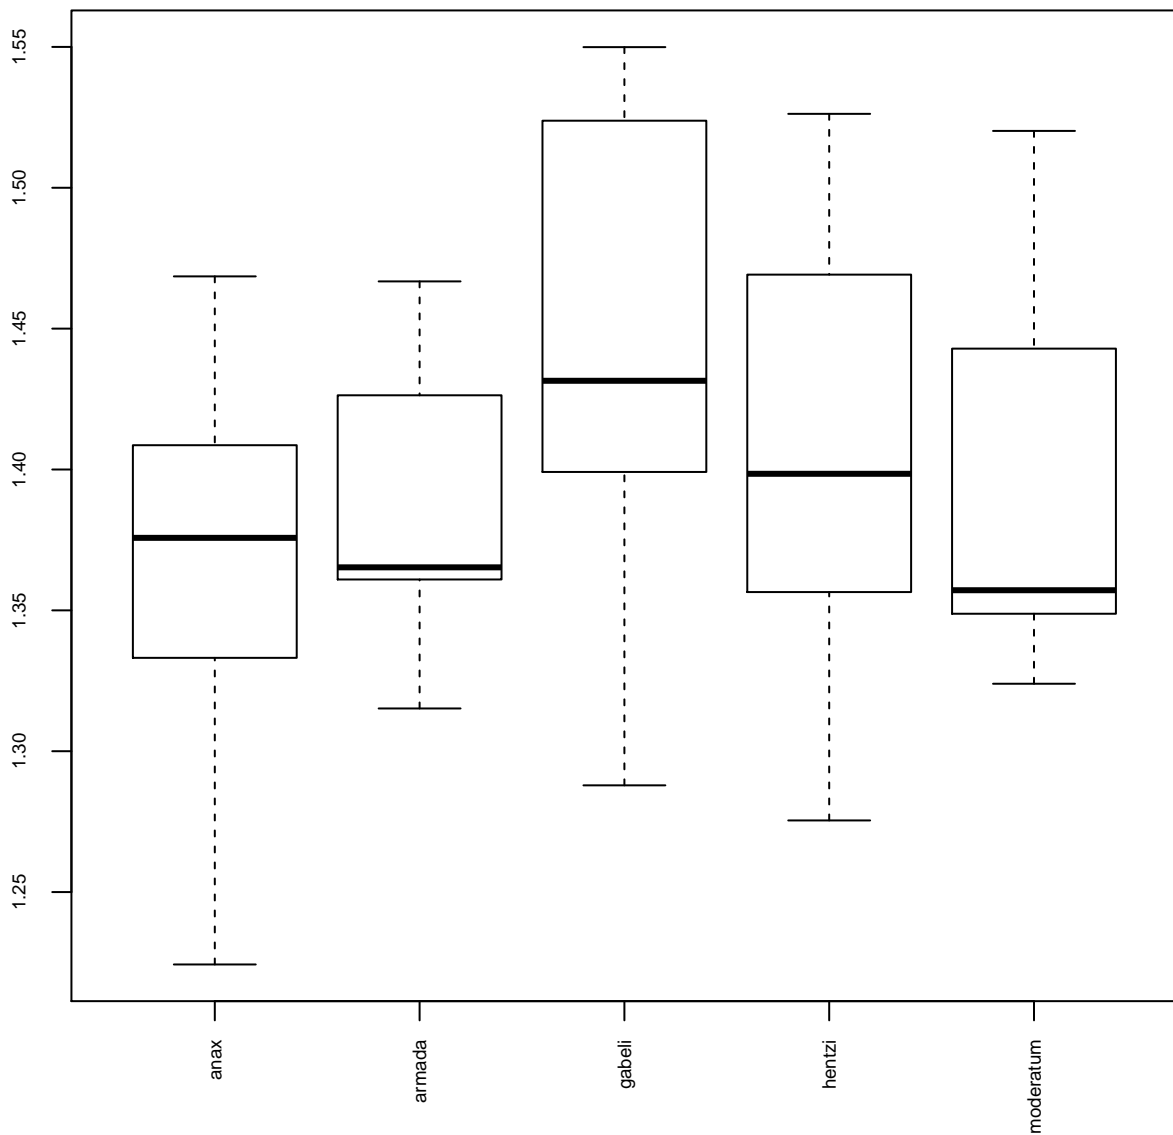

Supplement: Supplementary file 89

# Patella 3/Metatarsus 4 Length ratio – males

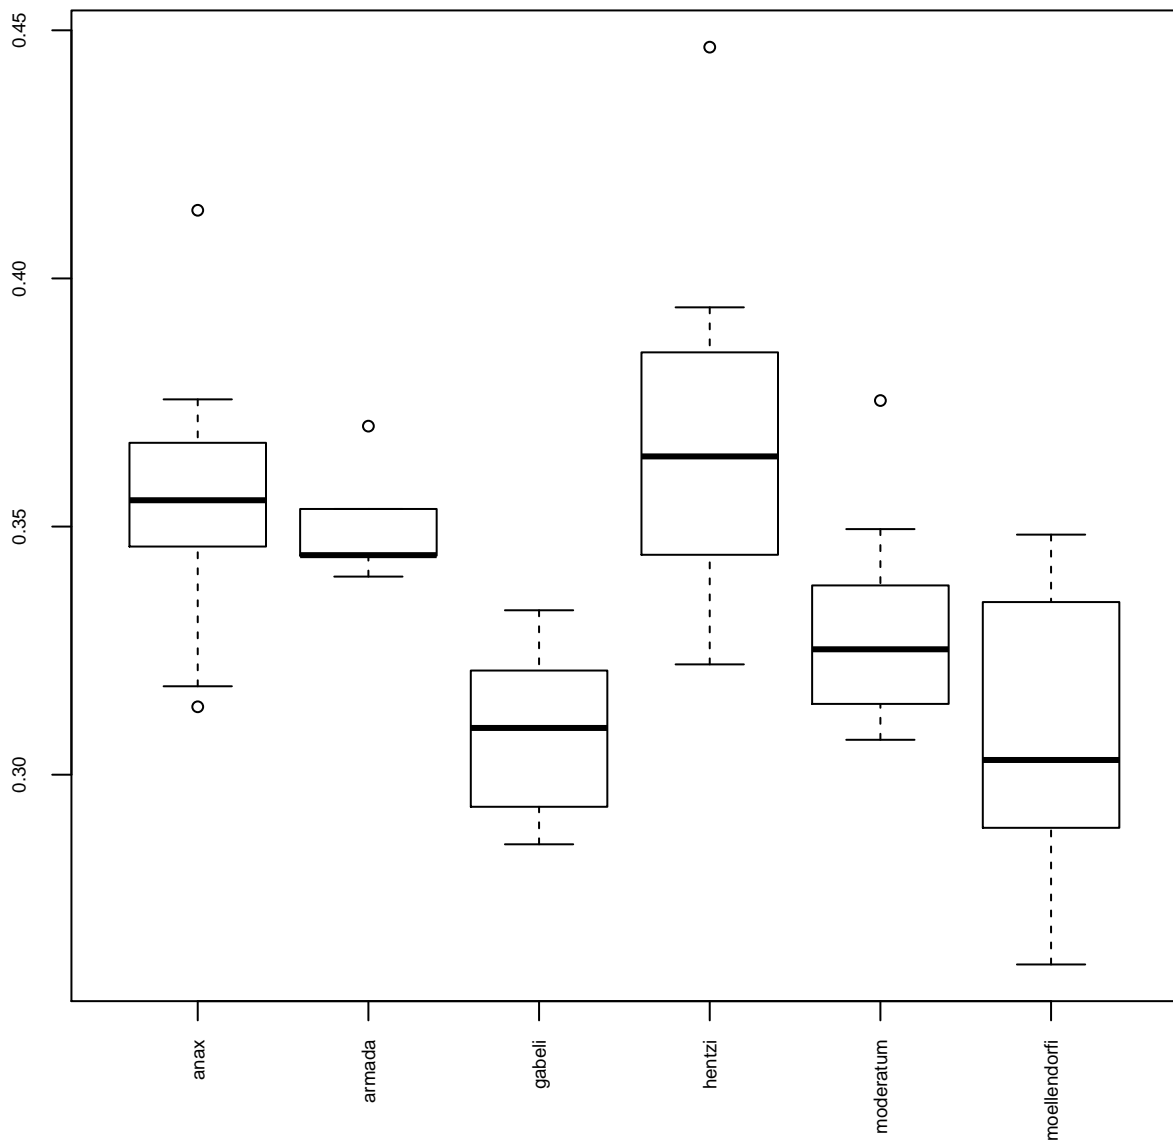

Supplement: Supplementary file 90

## Metatarsus 3/Metatarsus 4 ratio – females

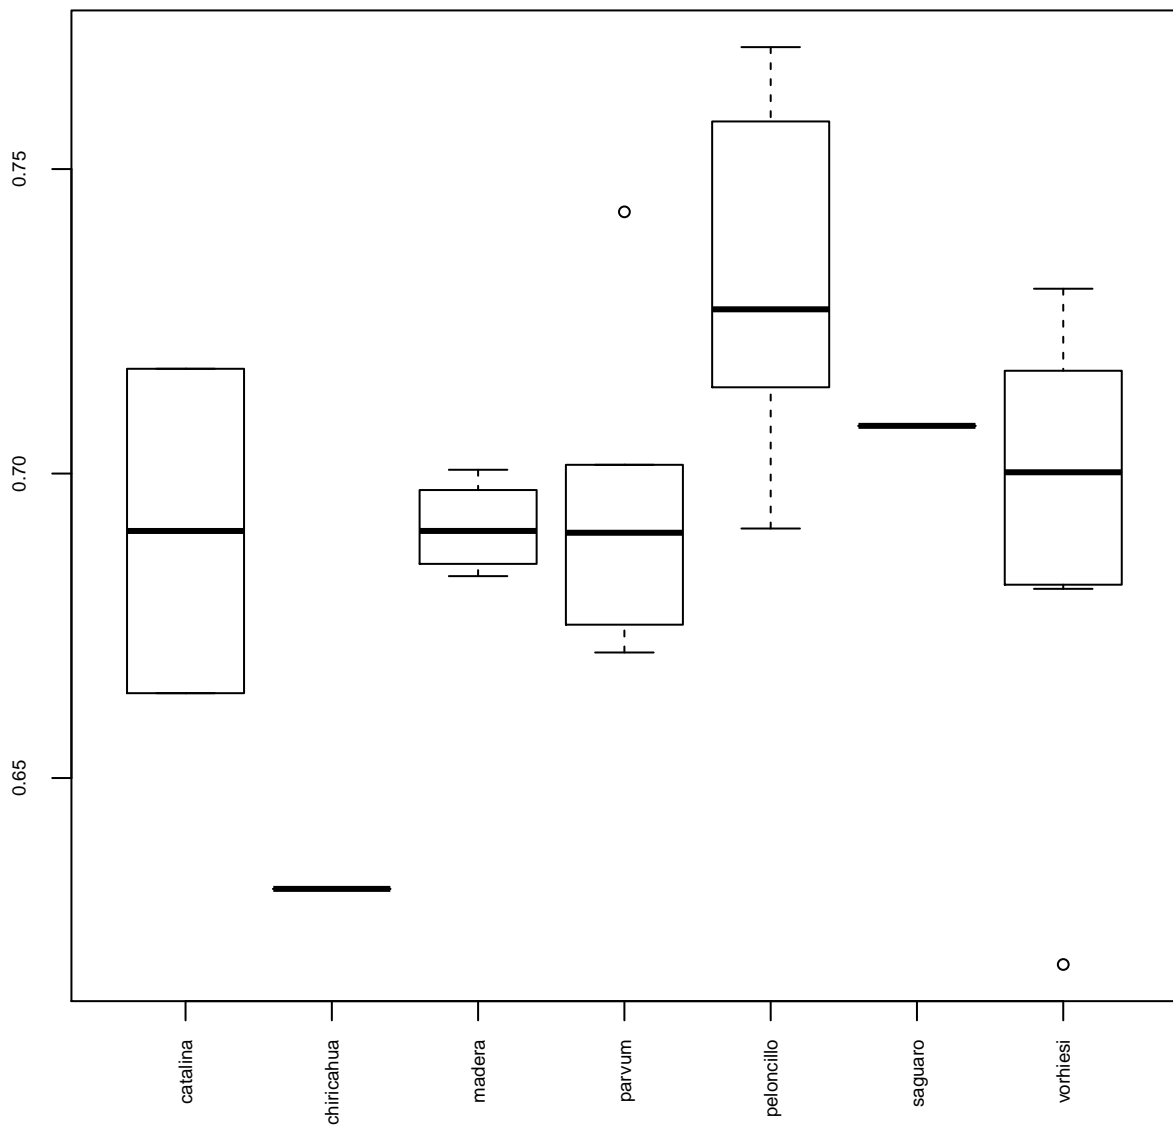

Supplement: Supplementary file 91

# Tibia 1/Patella 4 Length ratio – females

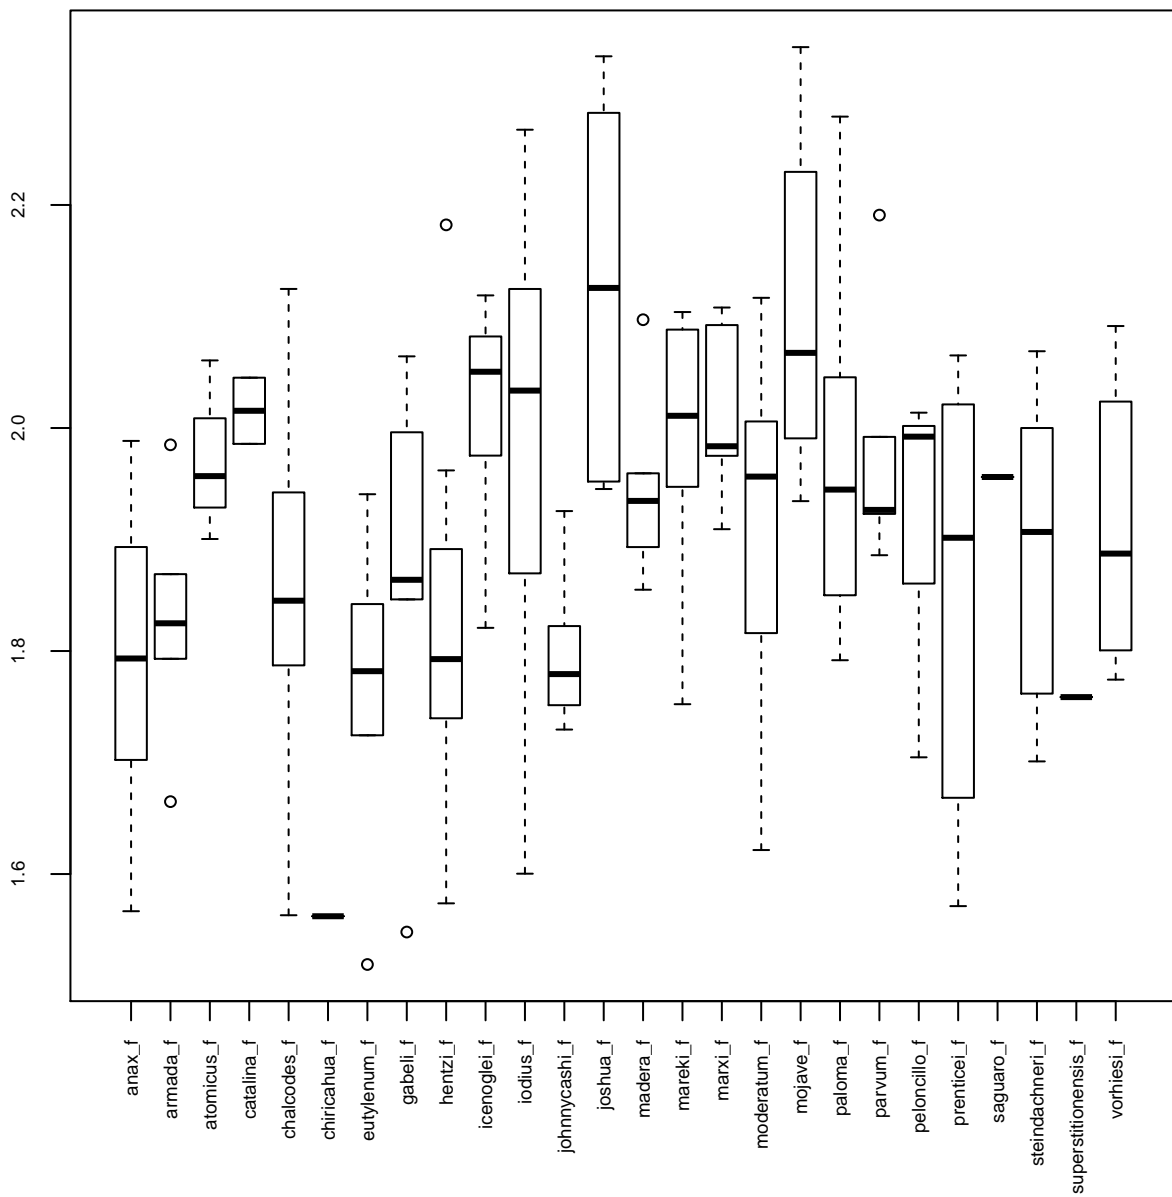

Supplement: Supplementary file 92

## Palpal Tibia/Metatarsus 4 Length ratio – males

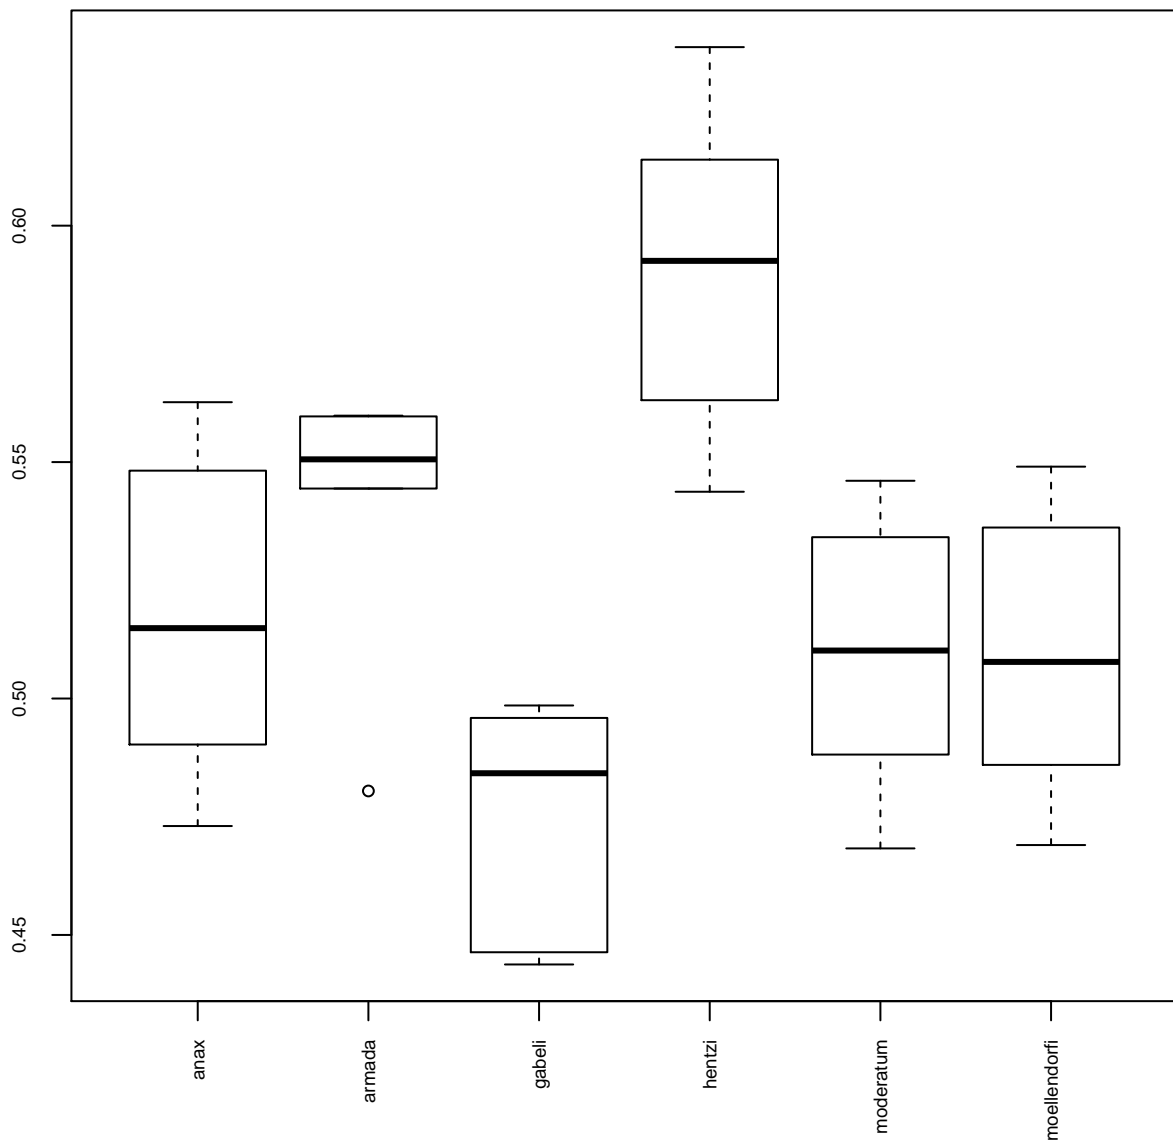

Supplement: Supplementary file 93

## Patella 1/Patella 4 ratio – males

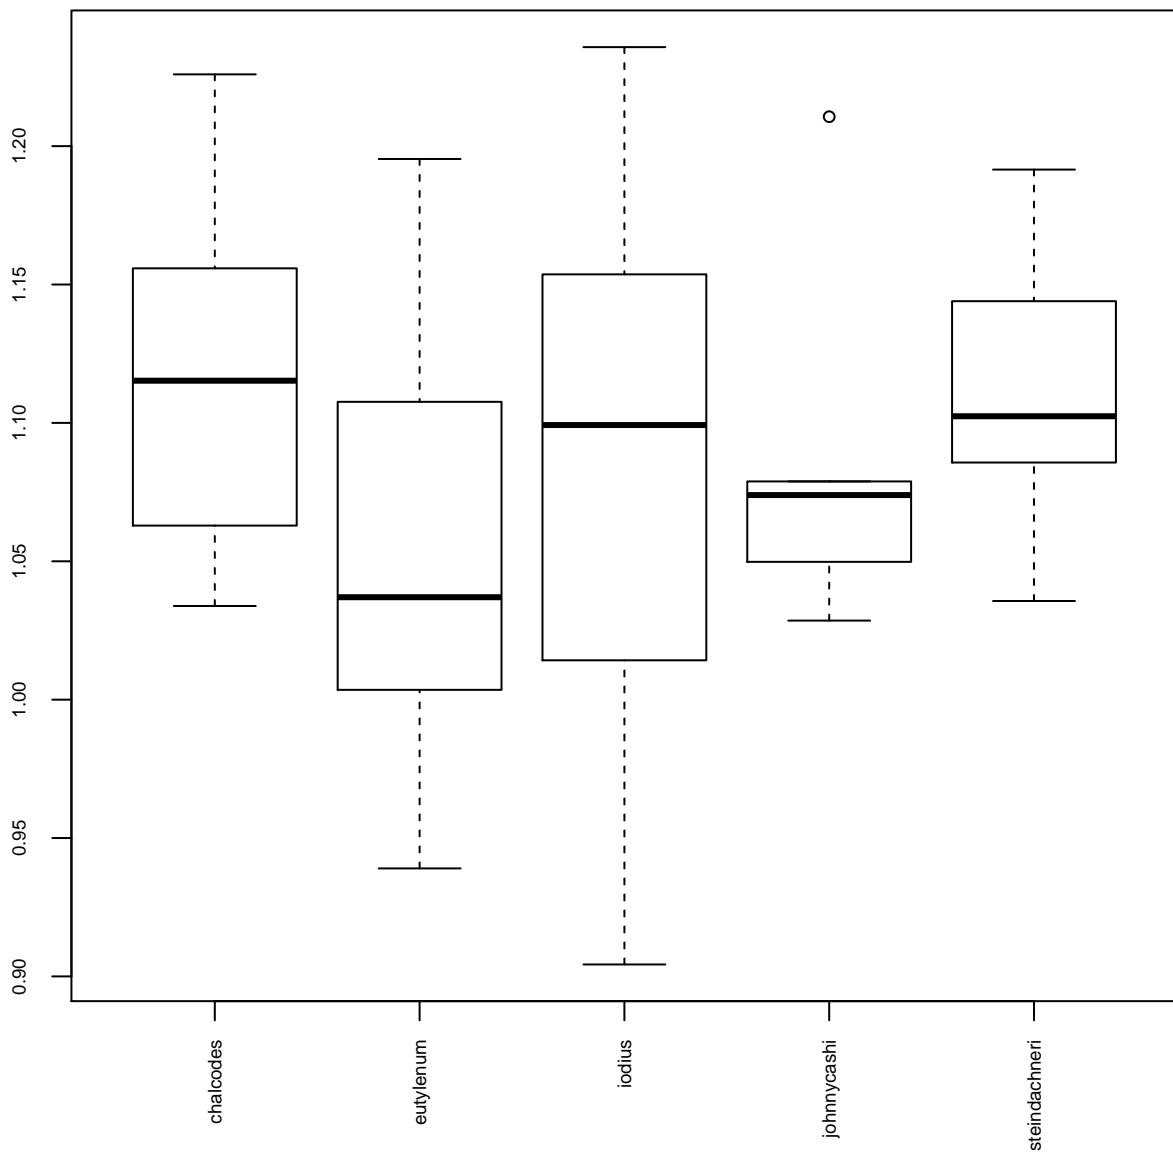

Supplement: Supplementary file 94

## Carapace Length/Femur 3 ratio – females

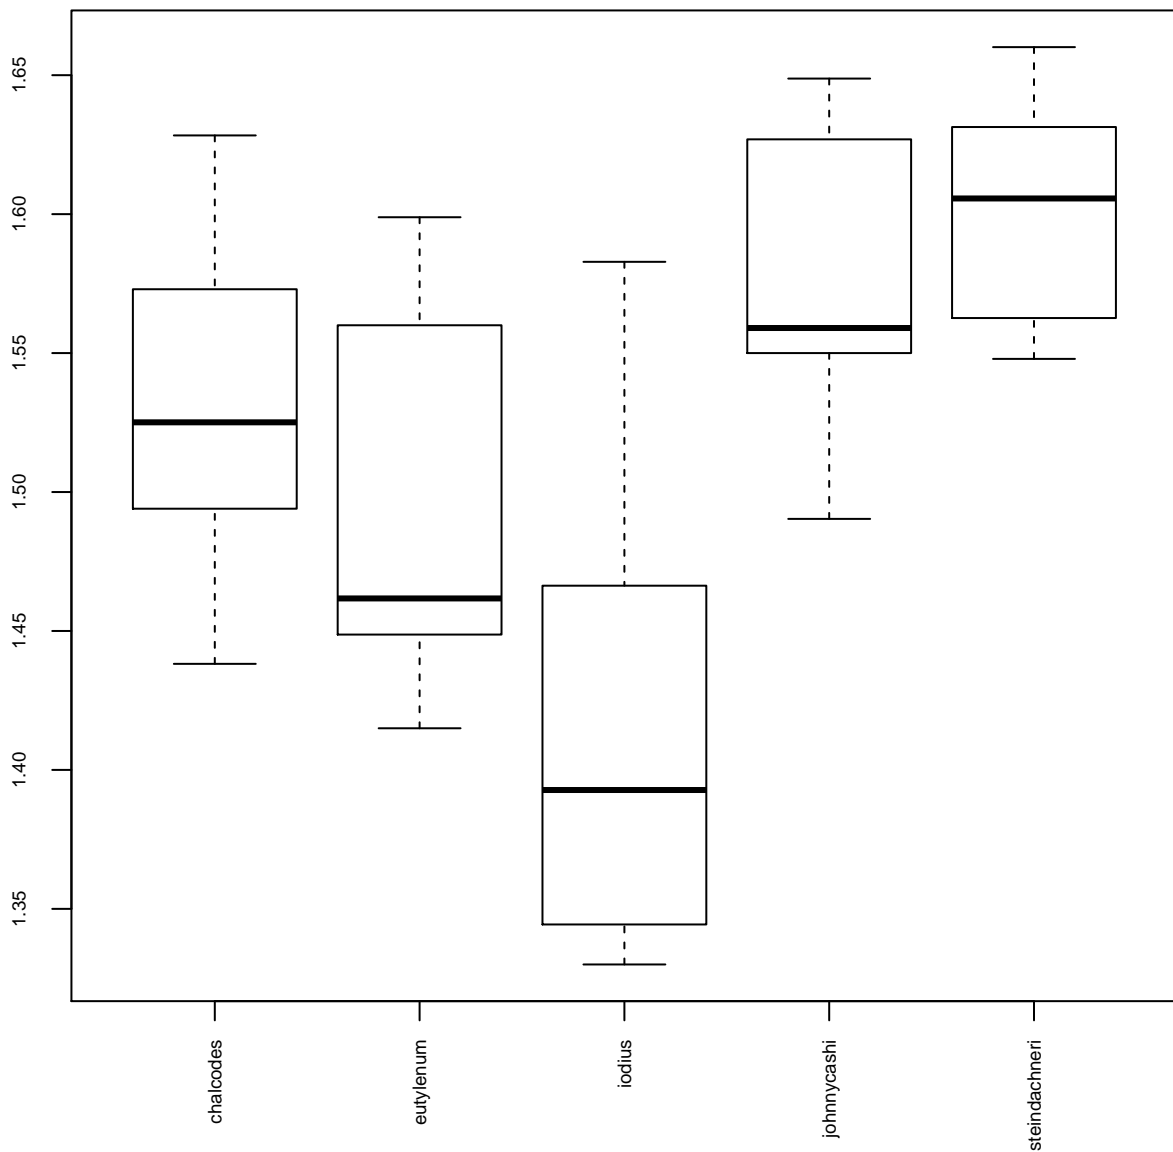

Supplement: Supplementary file 95

## Femur 1/Tibia 3 ratio – females

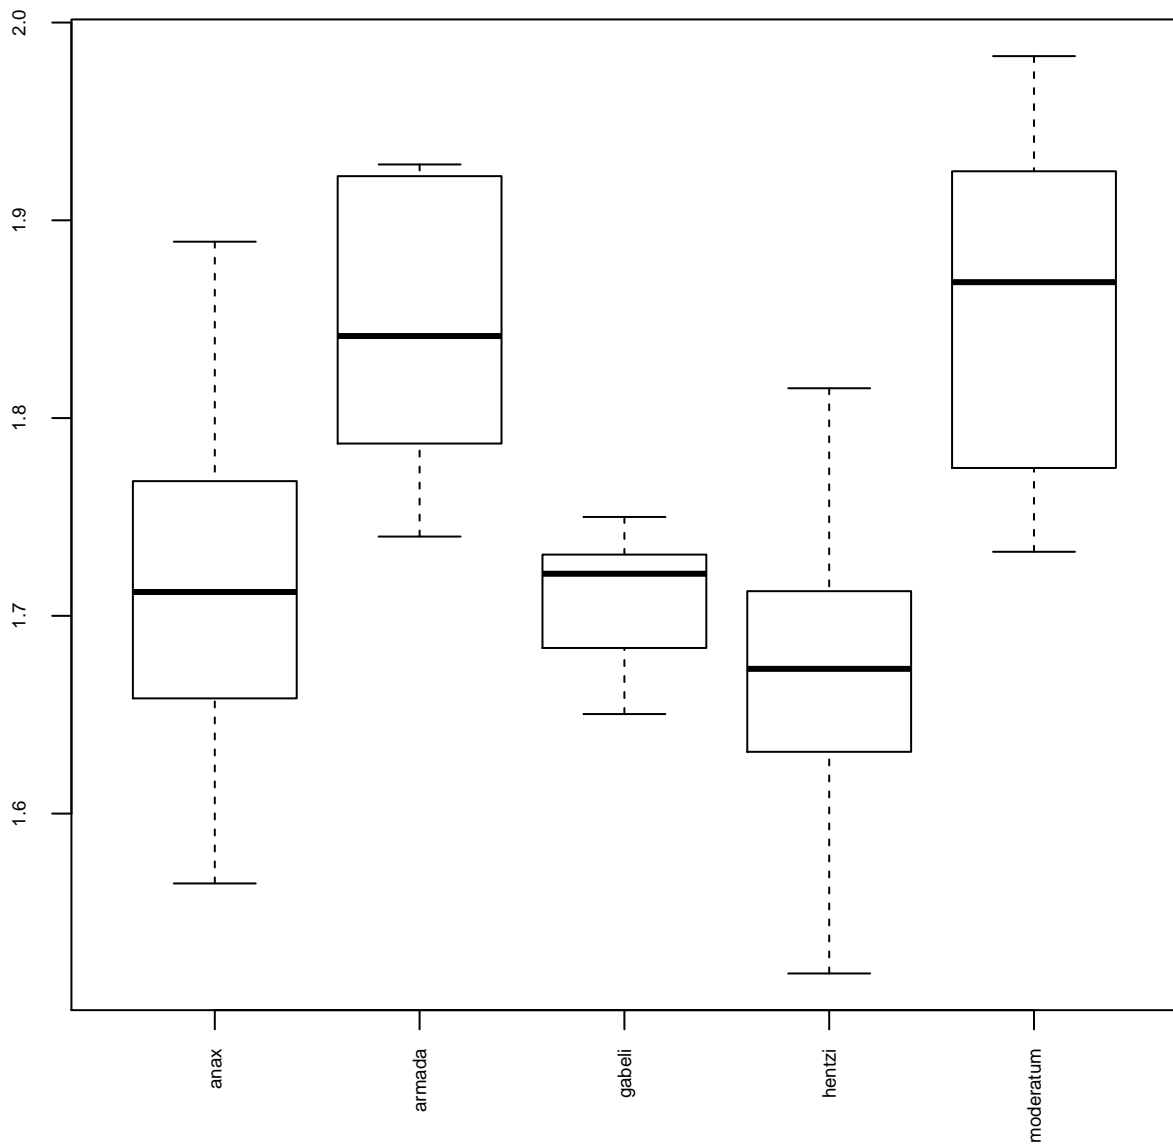

Supplement: Supplementary file 96

## Carapace Length/Femur 1 ratio – males

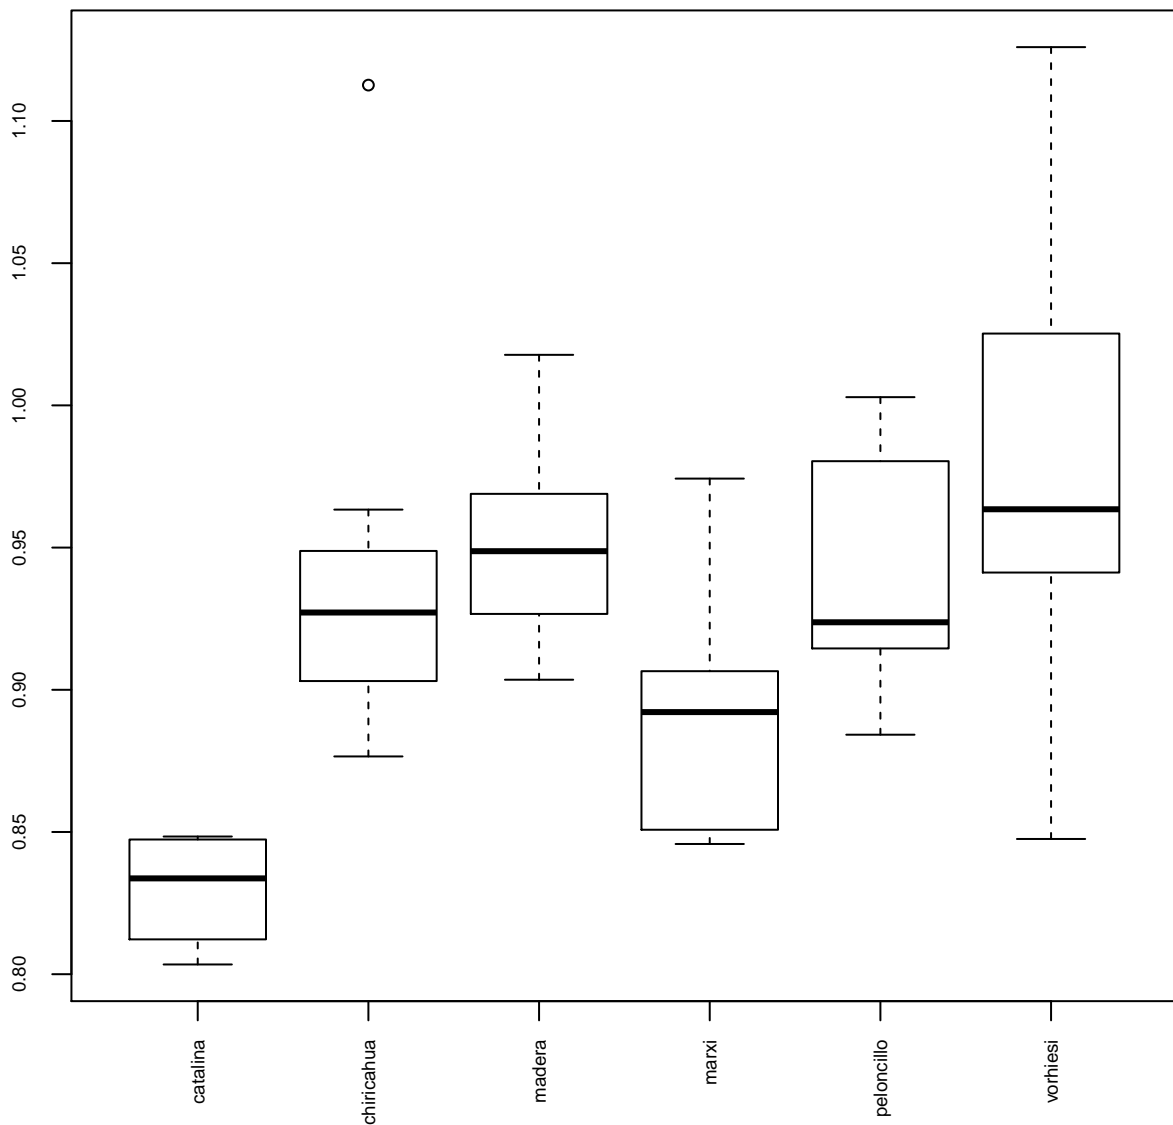

Supplement: Supplementary file 97

## Leg 1/Leg 3 Length ratio – females

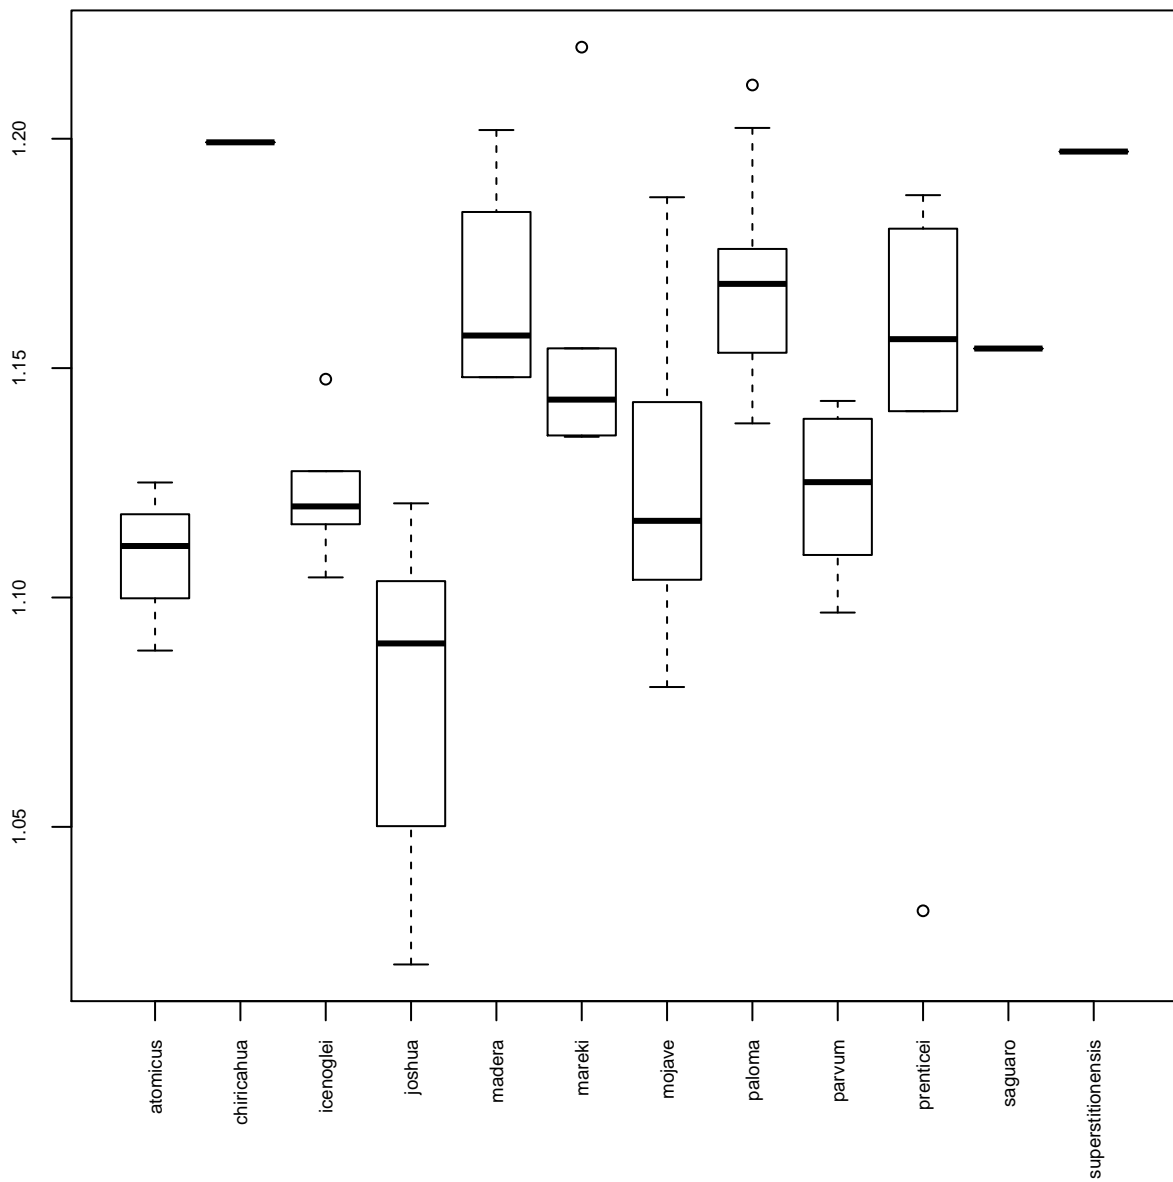

Supplement: Supplementary file 98

## Patella 3/Tibia 4 Length ratio – females

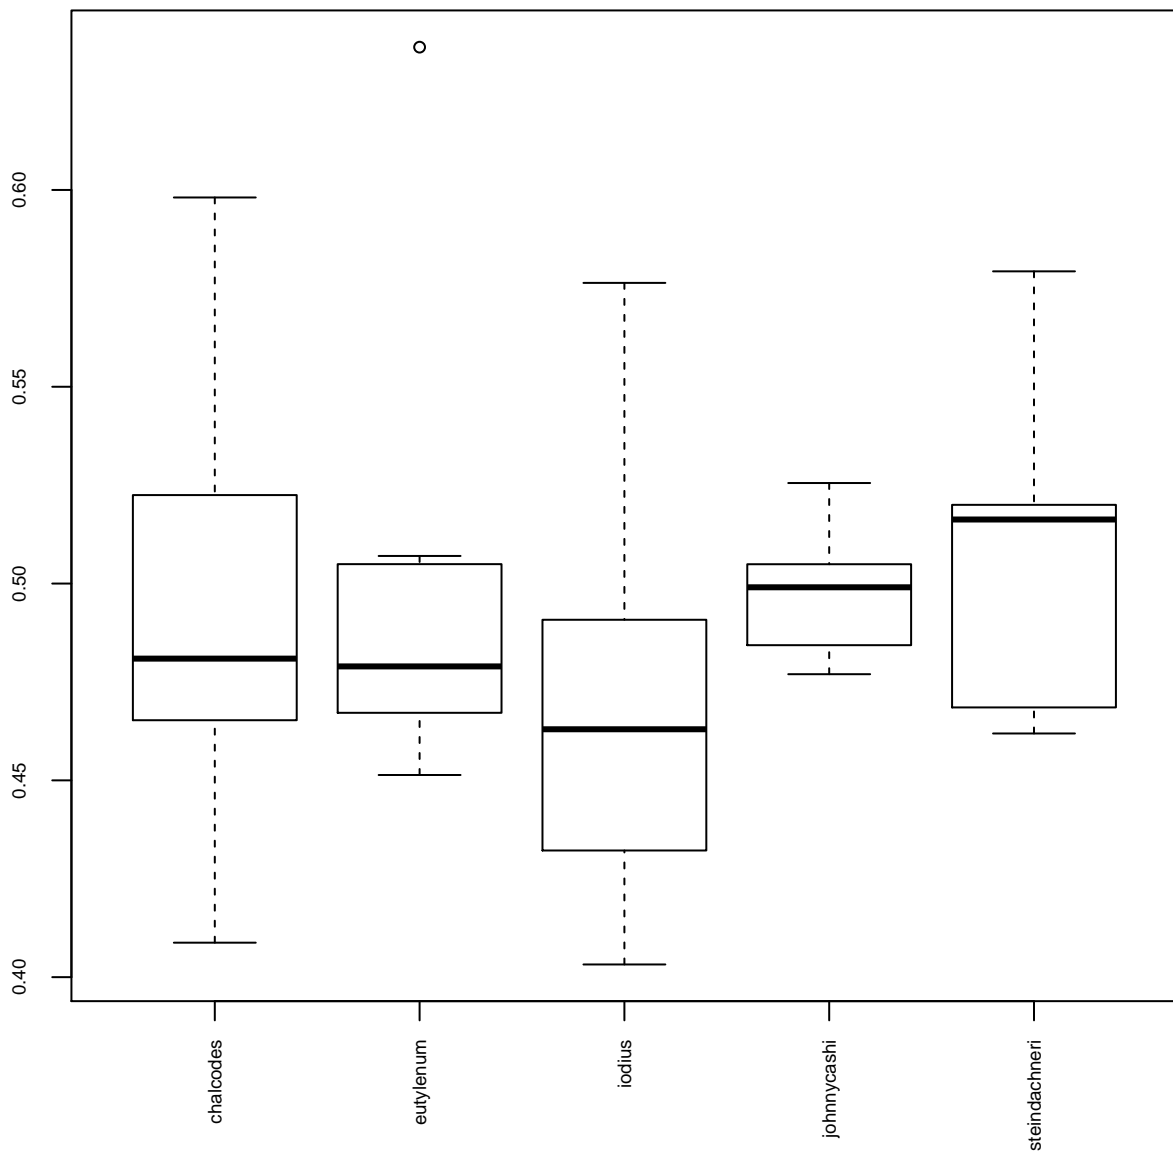

Supplement: Supplementary file 99

## Femur 1/Tarsus 3 ratio – females

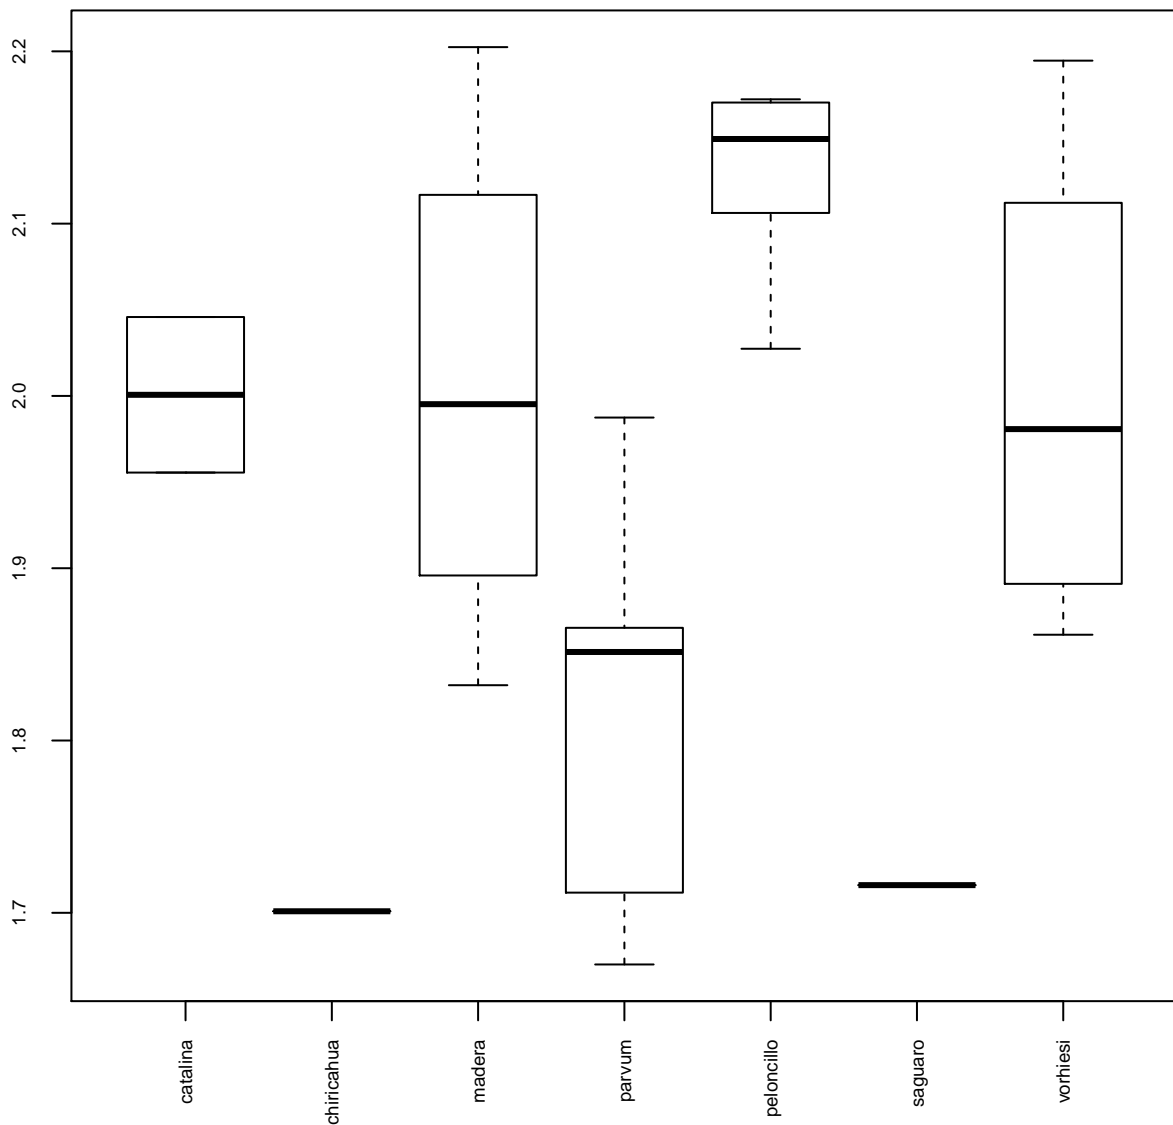

Supplement: Supplementary file 100
