# Supplementary material (part 2 of 15)
Source: publisher site journal article supplement (http://zookeys.pensoft.net/article/6264/download/suppl/32/)

## Tarsus 3/Patella 4 Length ratio – females

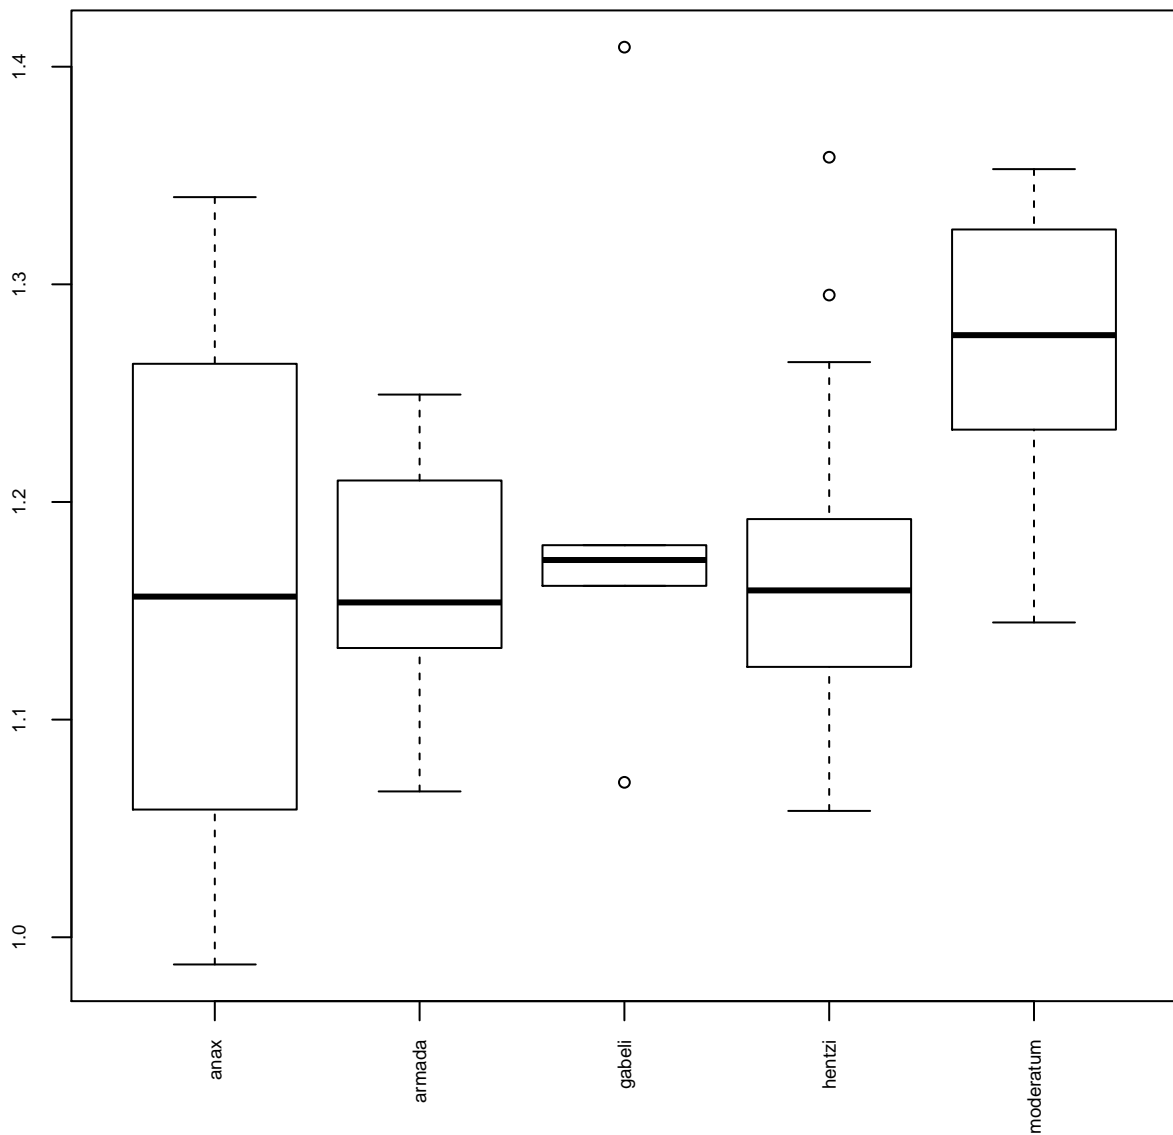

Supplement: Supplementary file 101

## Patella 1/Tarsus 3 Length ratio – males

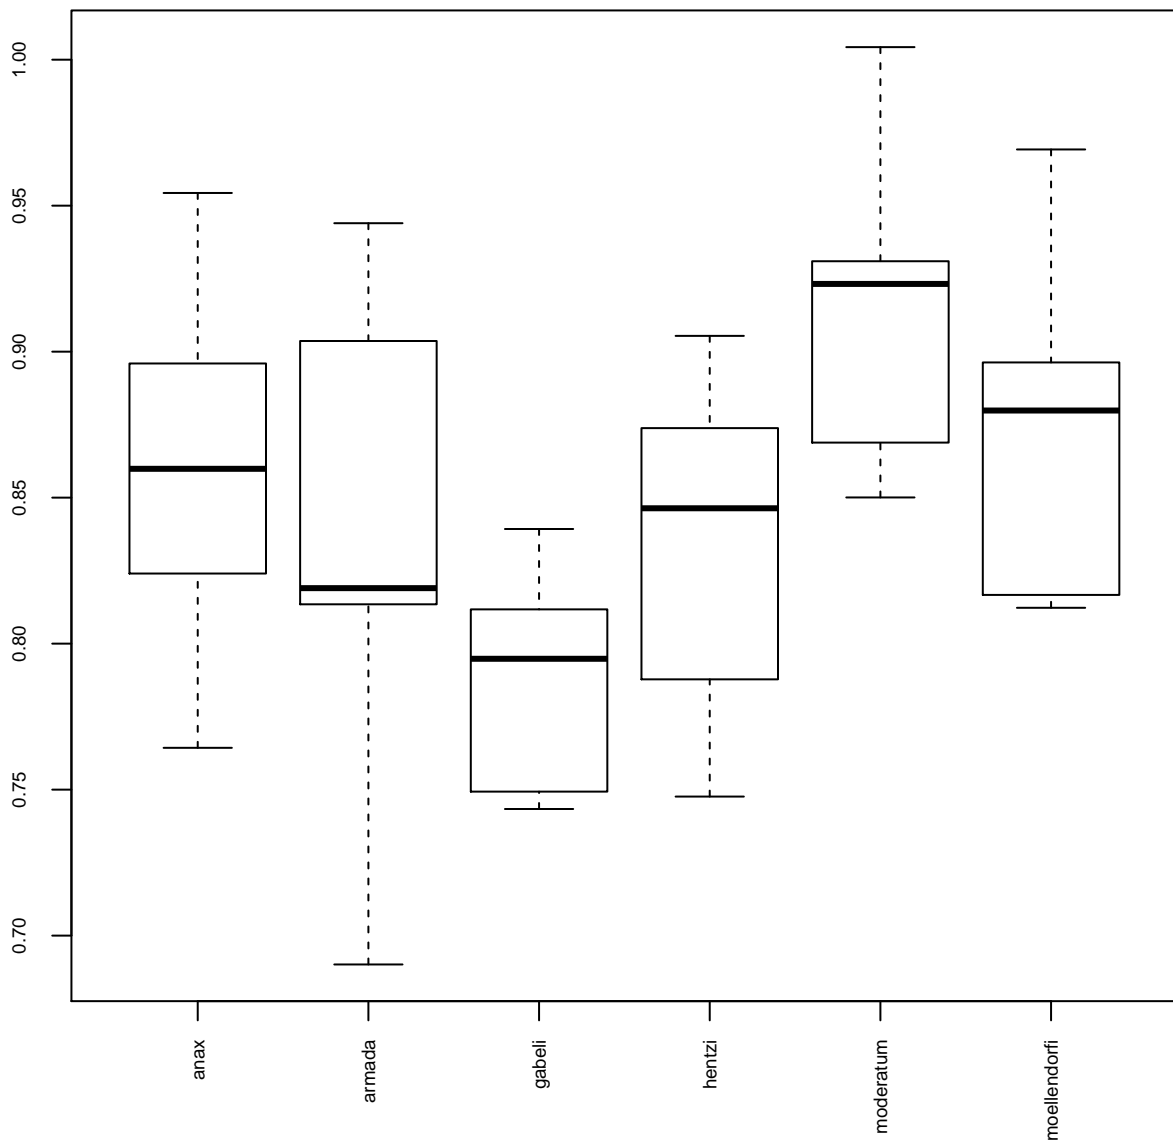

Supplement: Supplementary file 102

## Femur 1/Tarsus 1 ratio – females

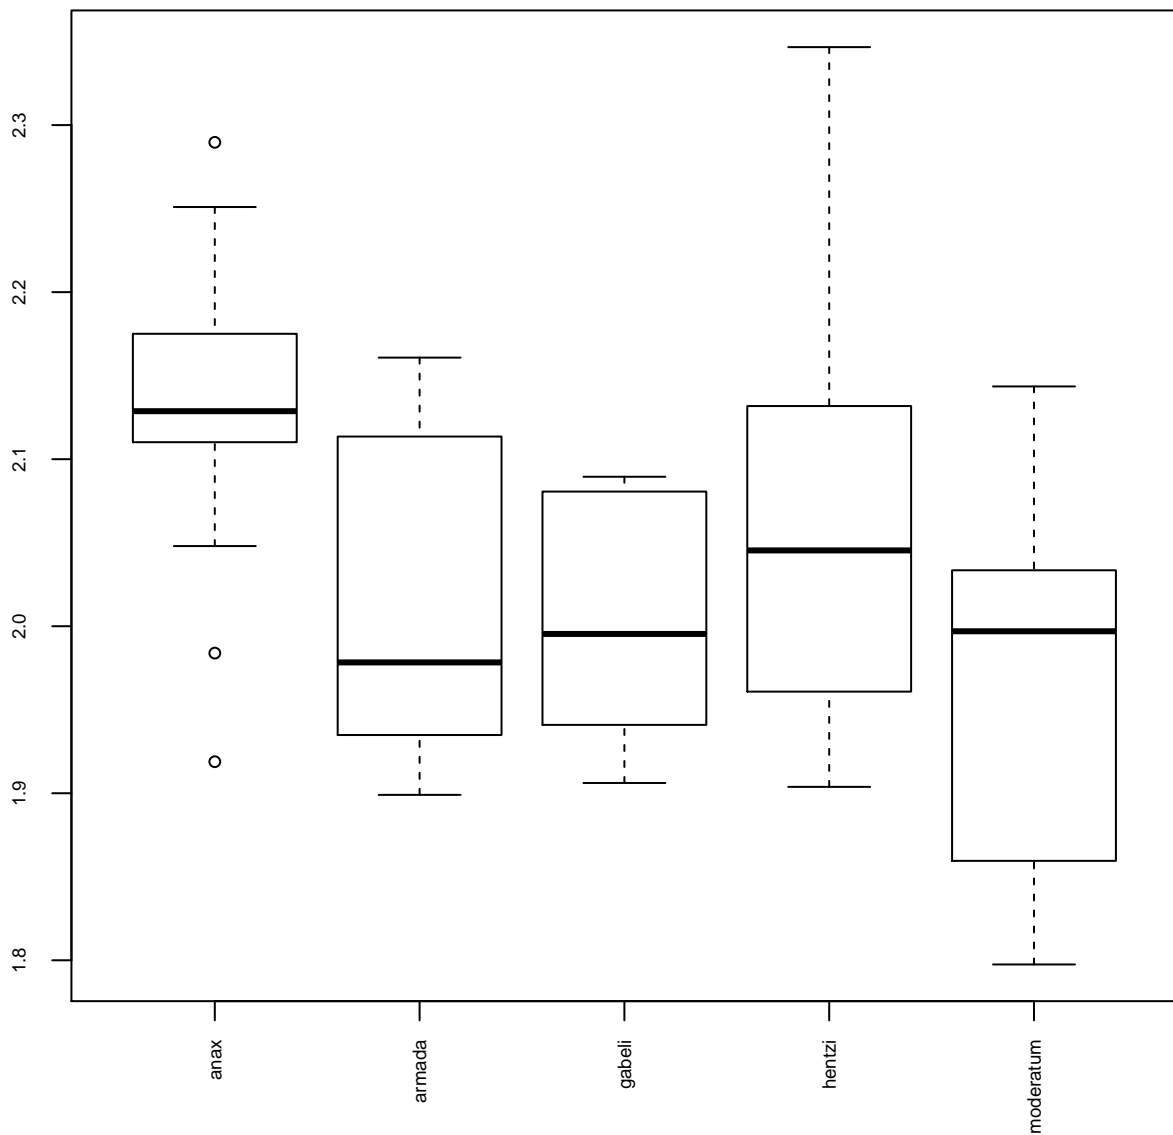

Supplement: Supplementary file 103

## Metatarsus 3/Tibia 4 Length ratio – males

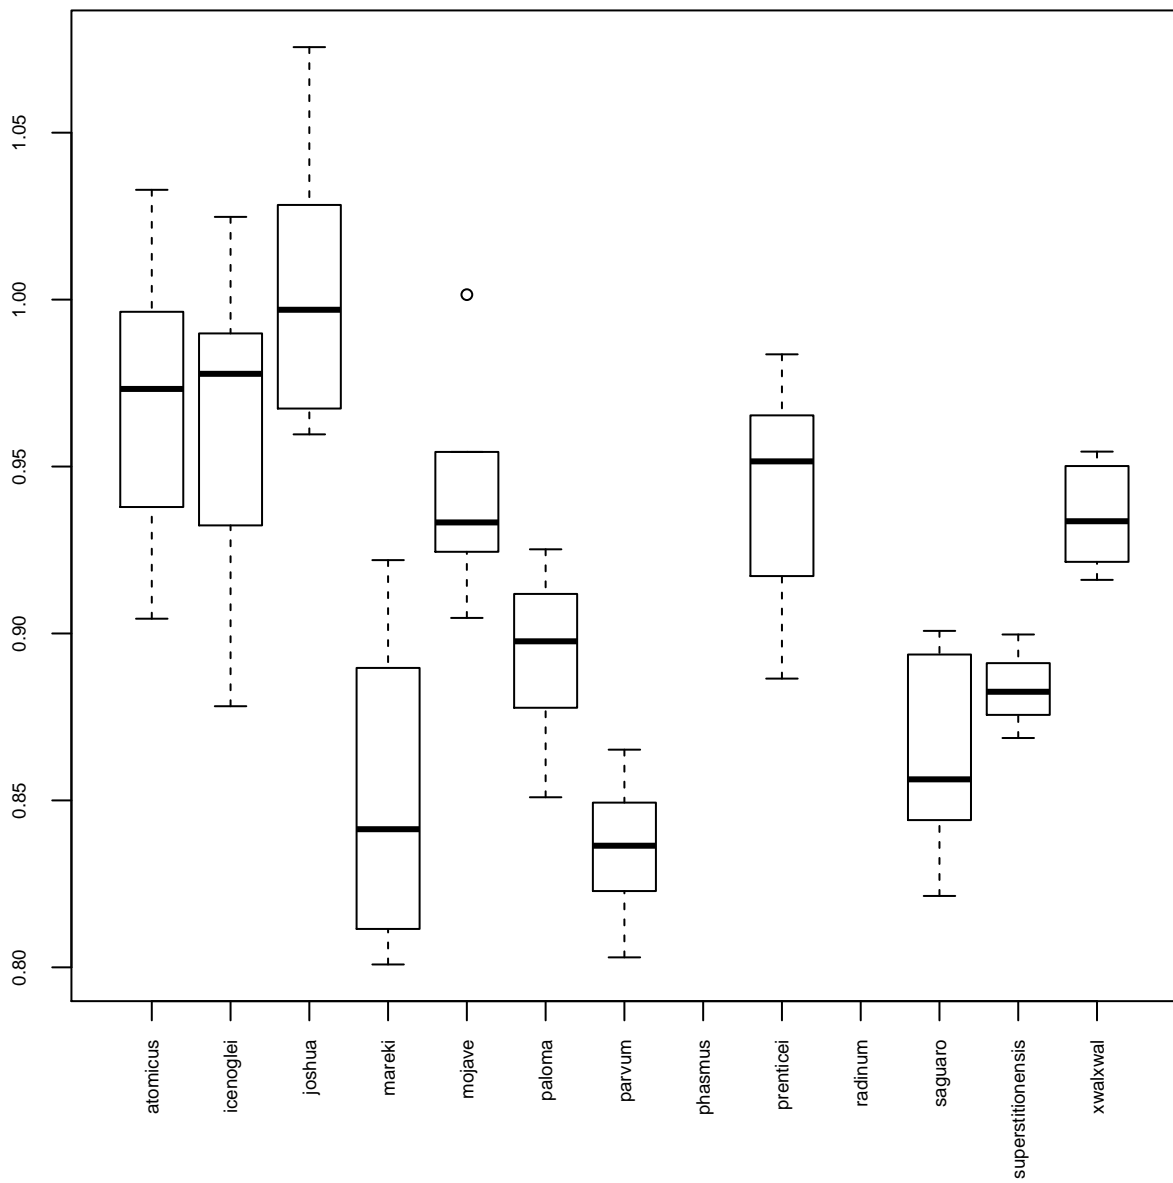

Supplement: Supplementary file 104

## Tarsus 1/Femur 4 Length ratio – females

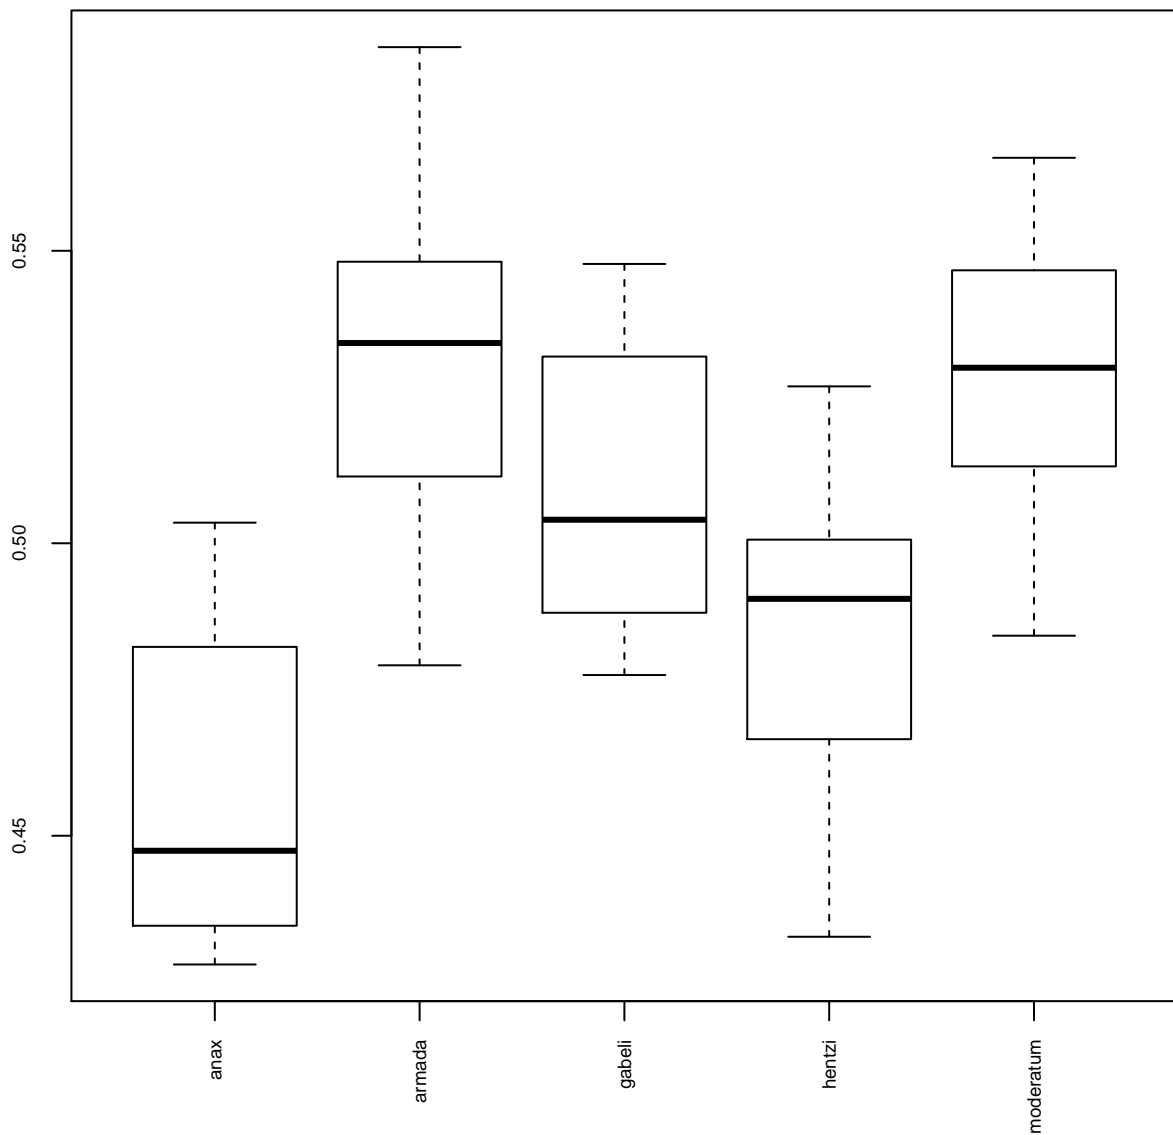

Supplement: Supplementary file 105

## Femur 4/Tibia 4 ratio – females

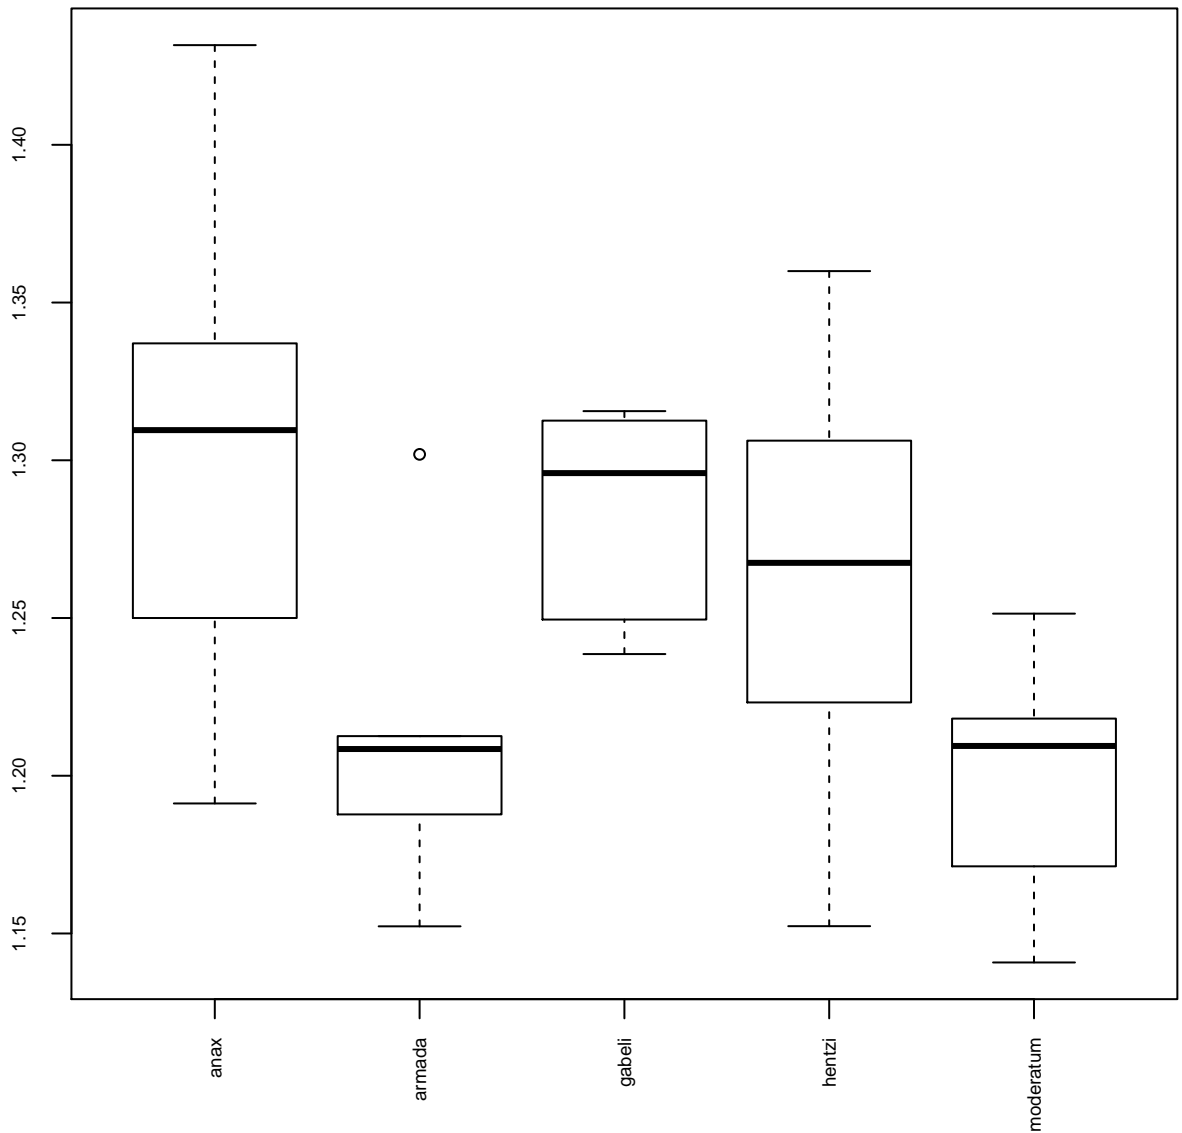

Supplement: Supplementary file 106

## Carapace Length/Patella 4 ratio – males

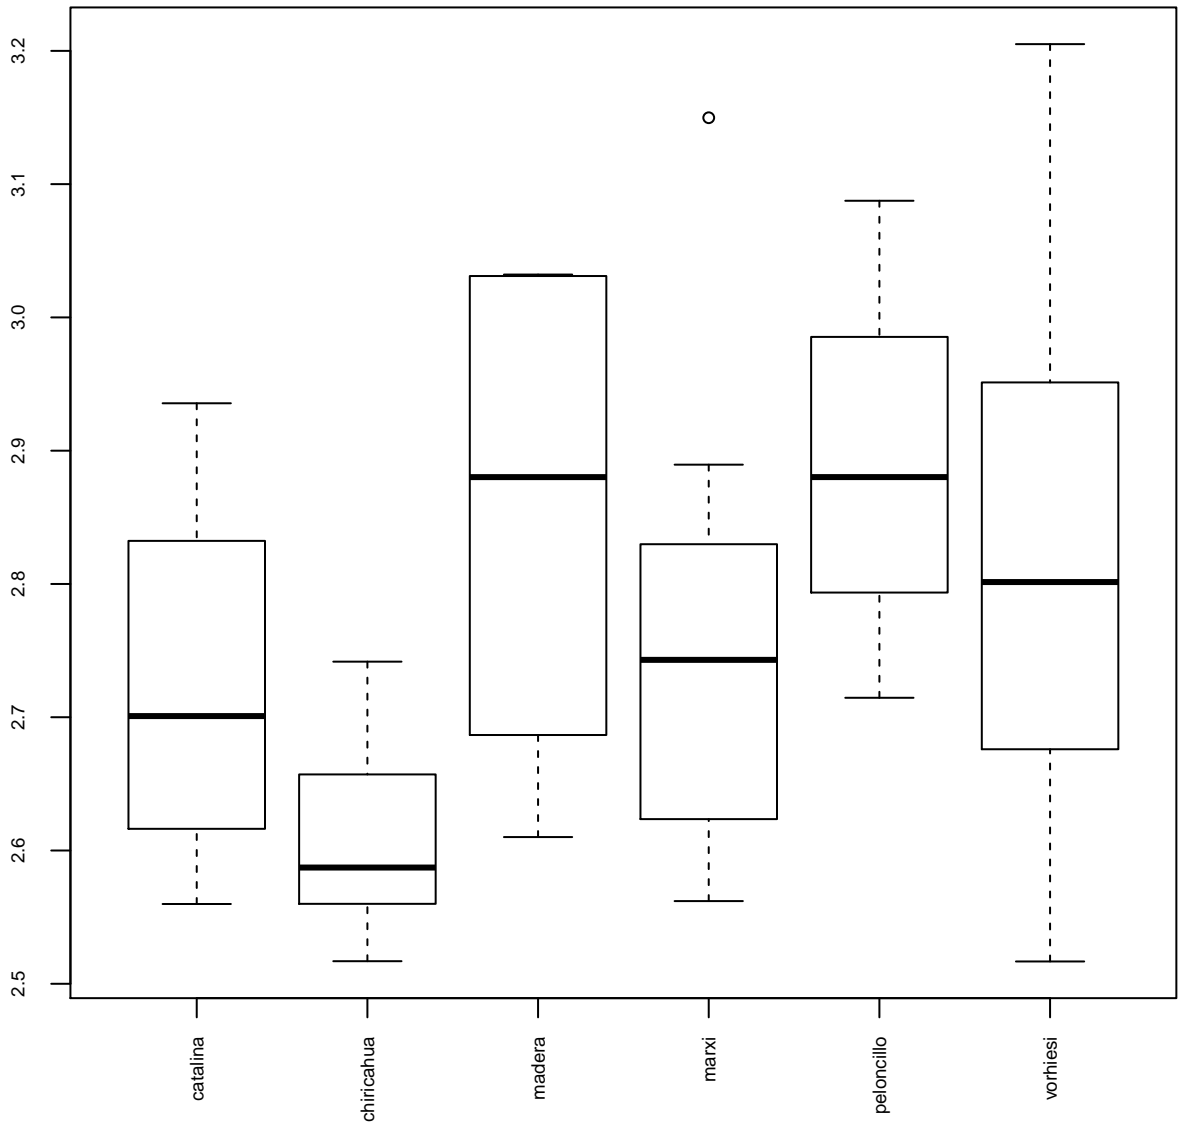

Supplement: Supplementary file 107

# Tibia 3/Tarsus 3 ratio – males

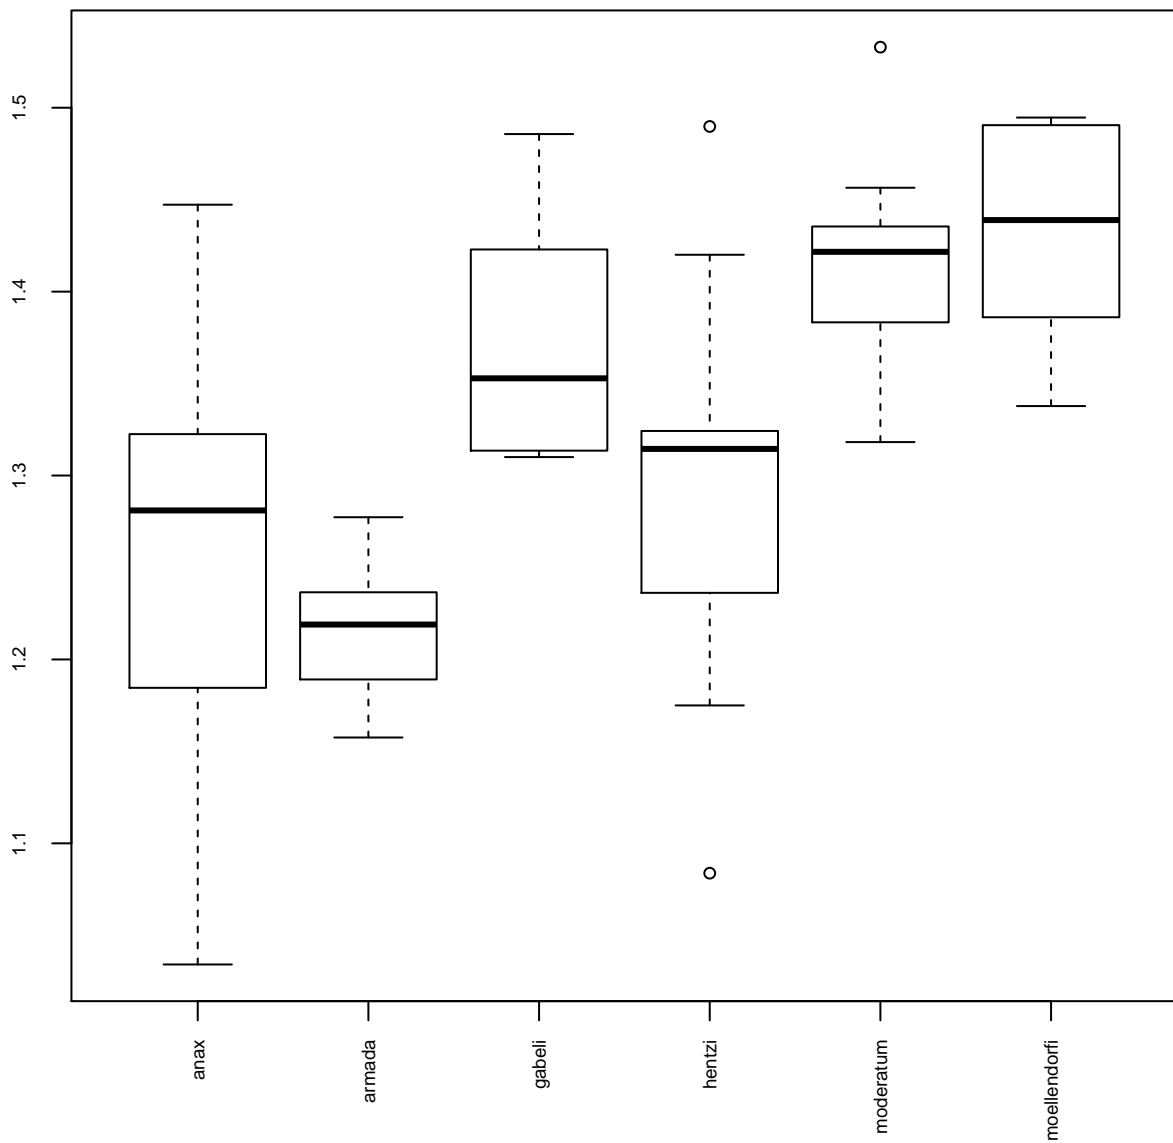

Supplement: Supplementary file 108

## Palpal Tibia/Femur 4 Length ratio – males

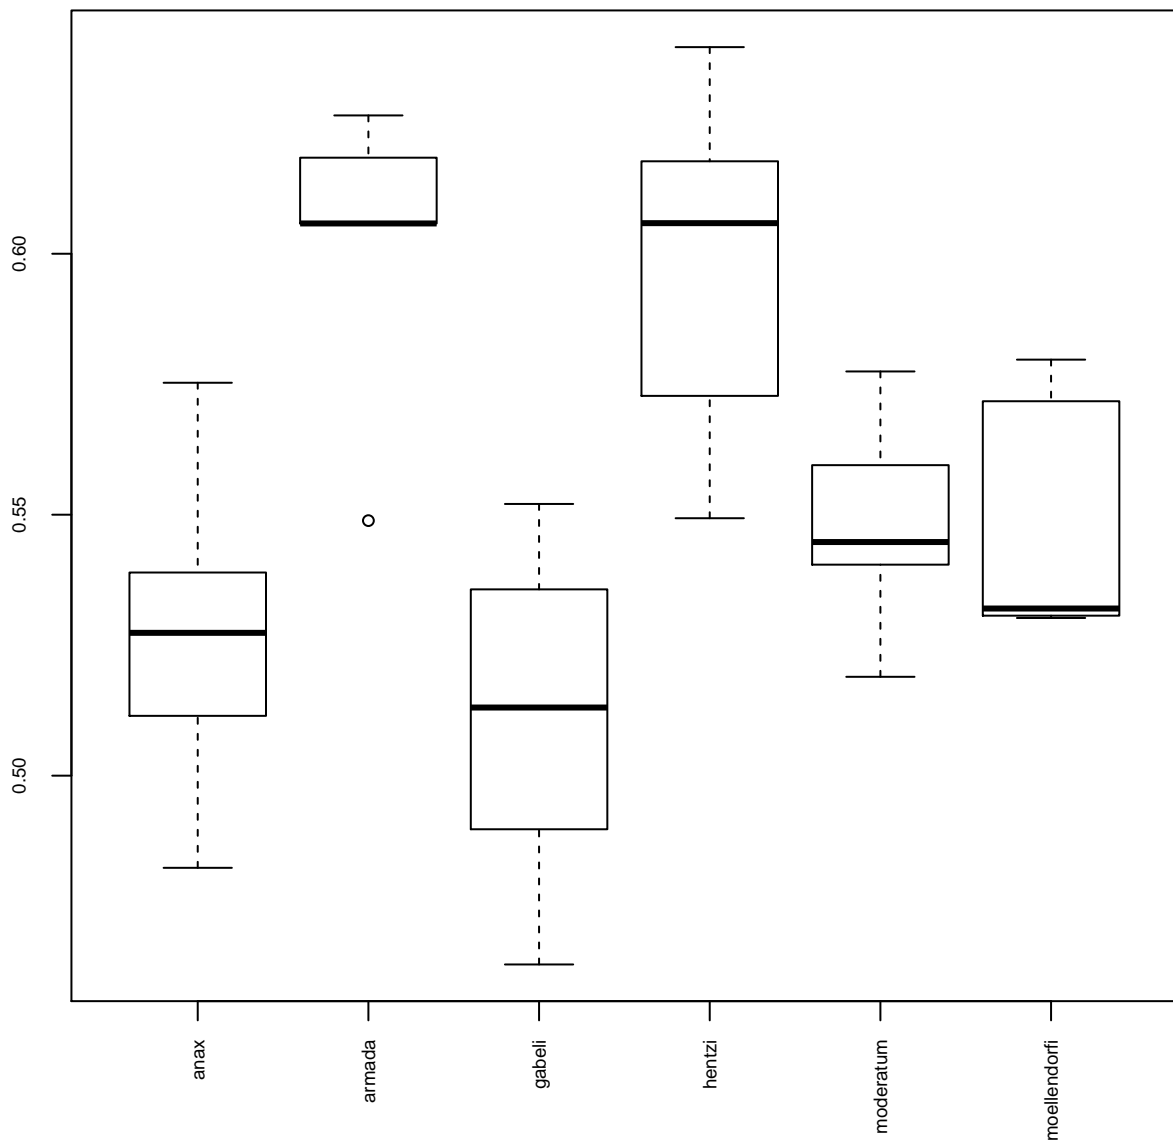

Supplement: Supplementary file 109

## Patella 3/Femur 4 Length ratio – males

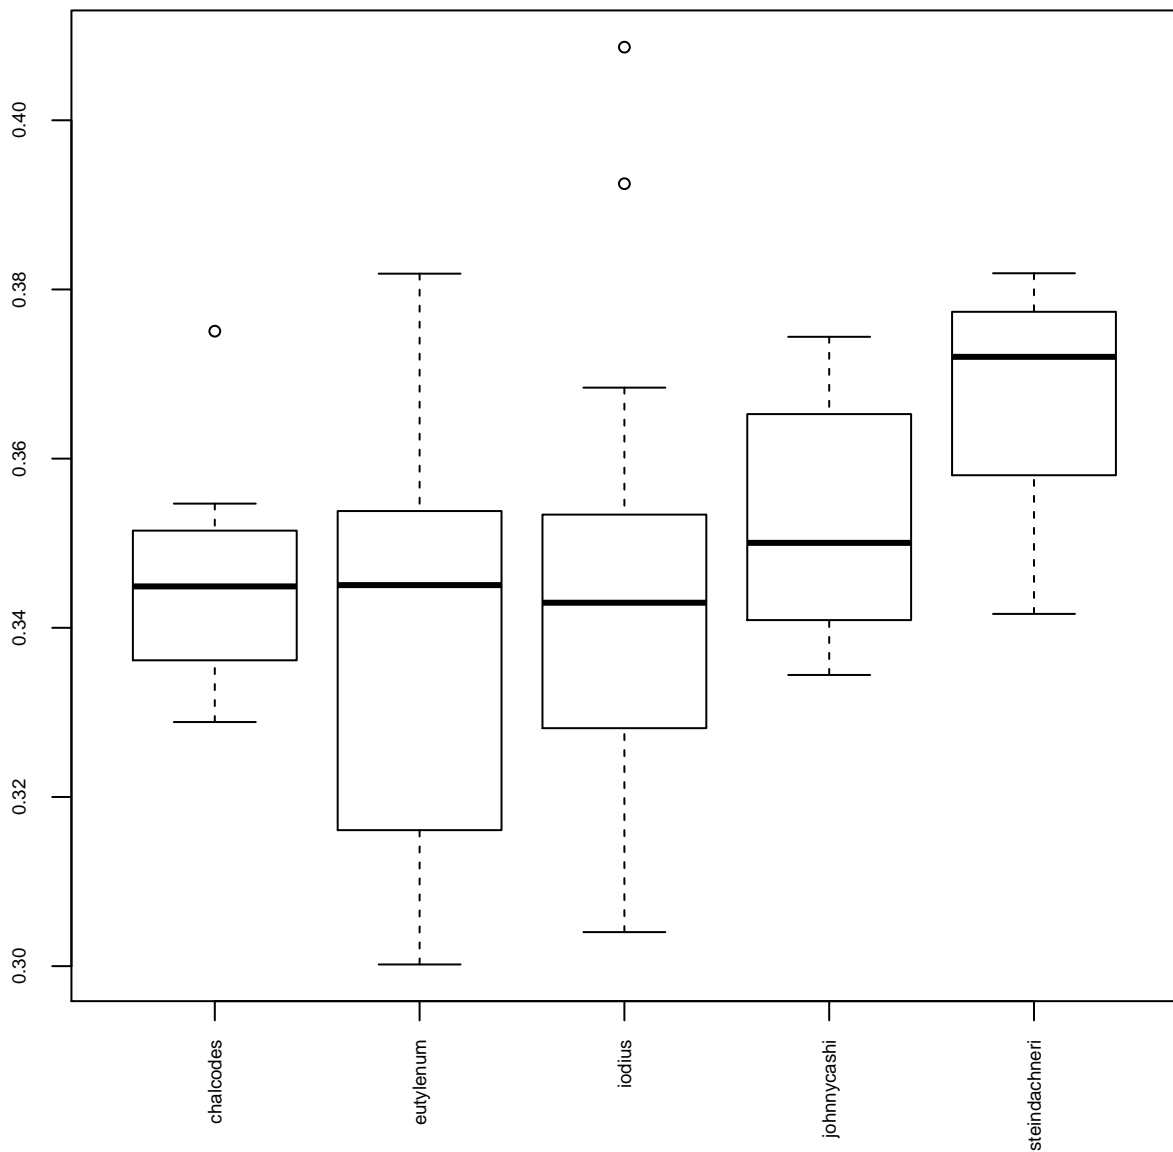

Supplement: Supplementary file 110

## Tibia 1/Tarsus 1 ratio – females

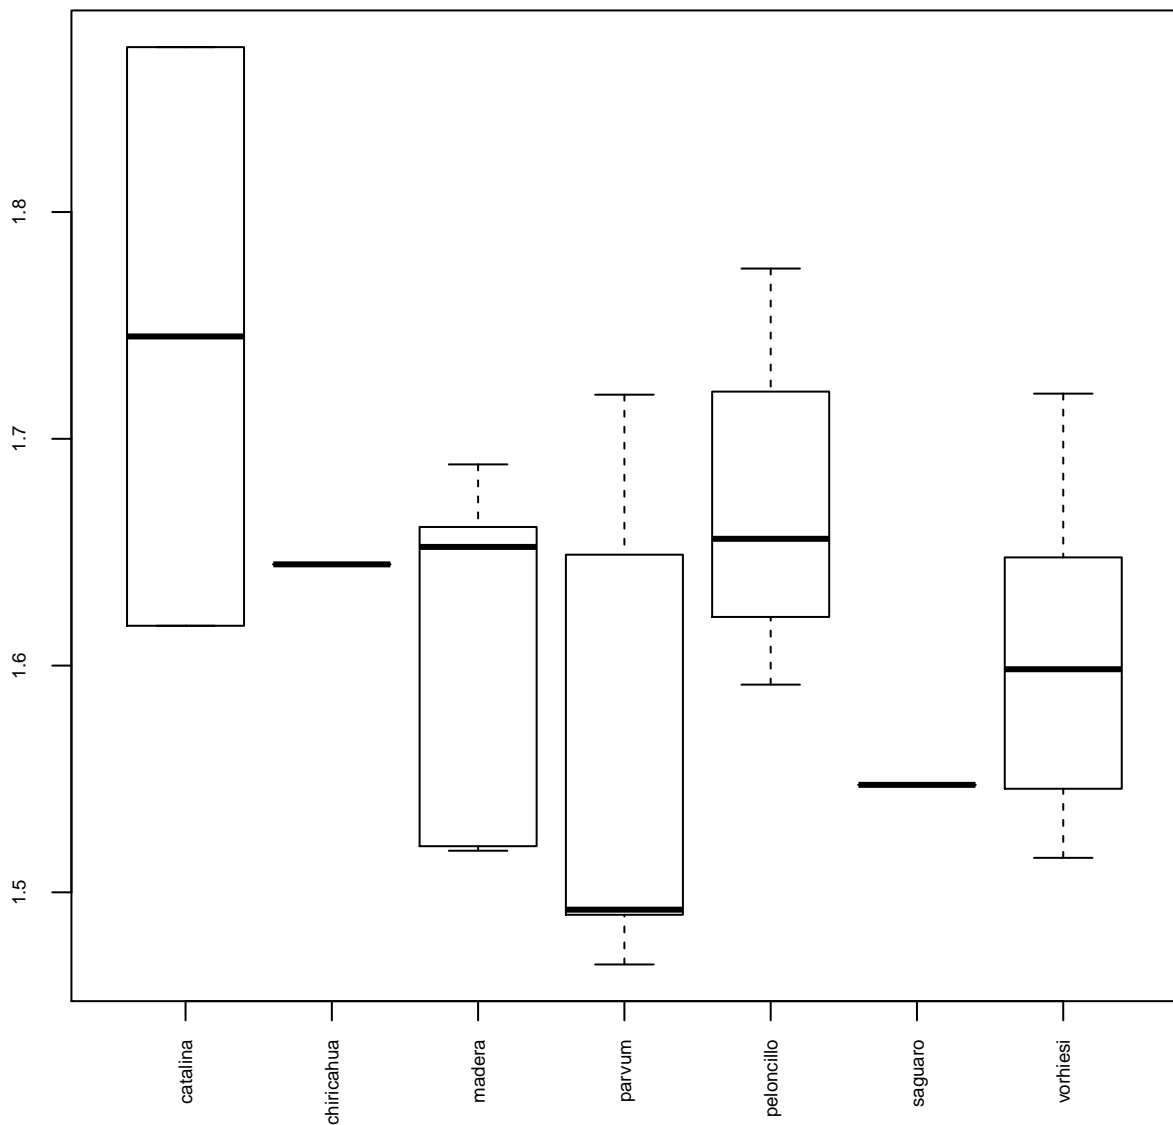

Supplement: Supplementary file 111

## Metatarsus 3/Tarsus 3 ratio – females

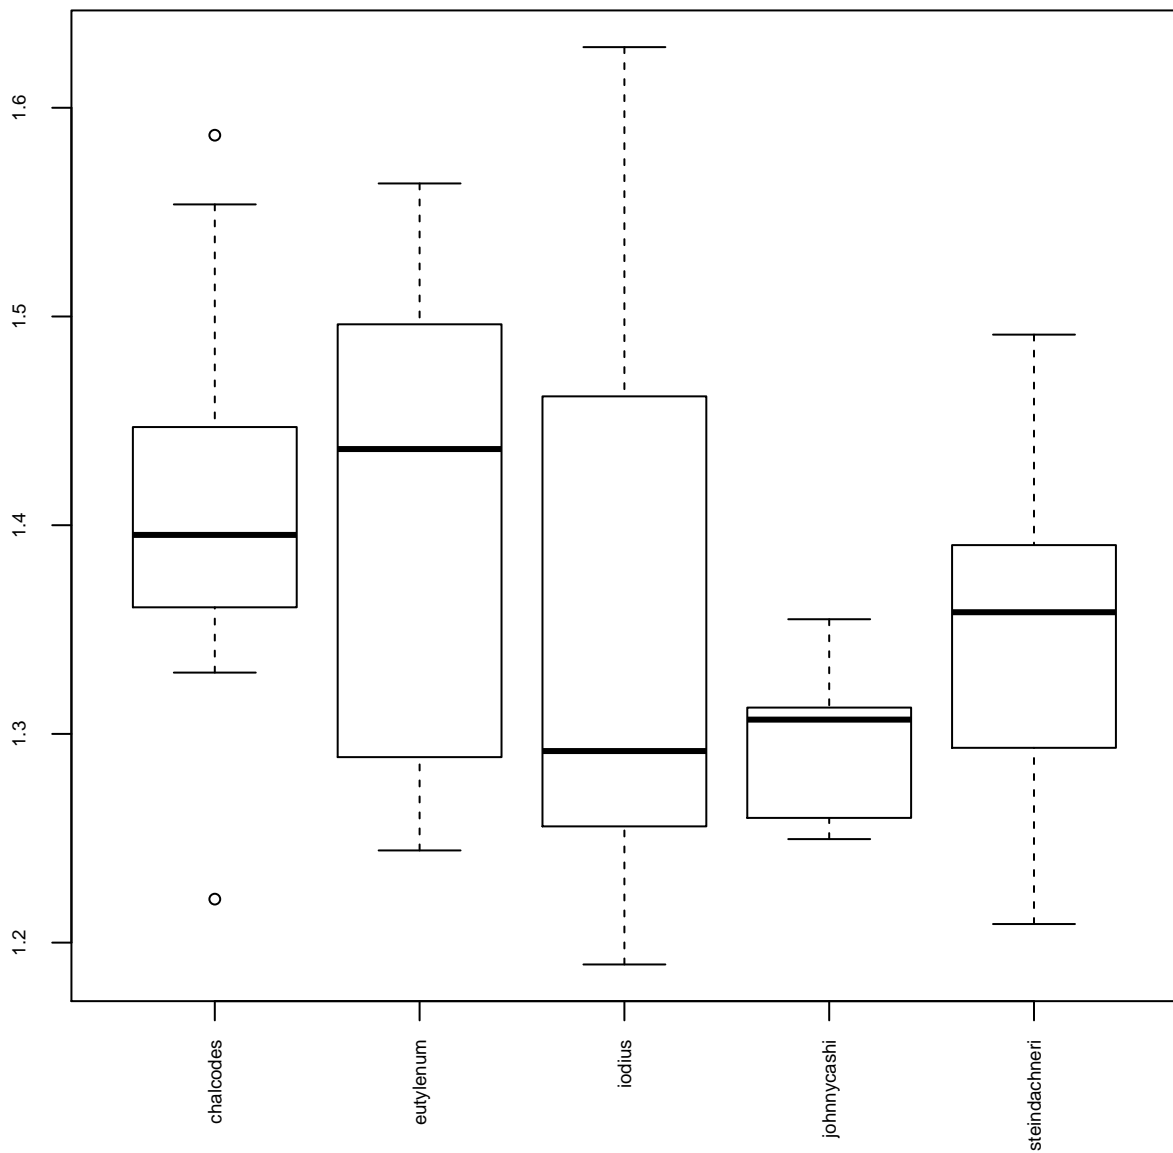

Supplement: Supplementary file 112

## Femur 3/Tibia 4 Length ratio – females

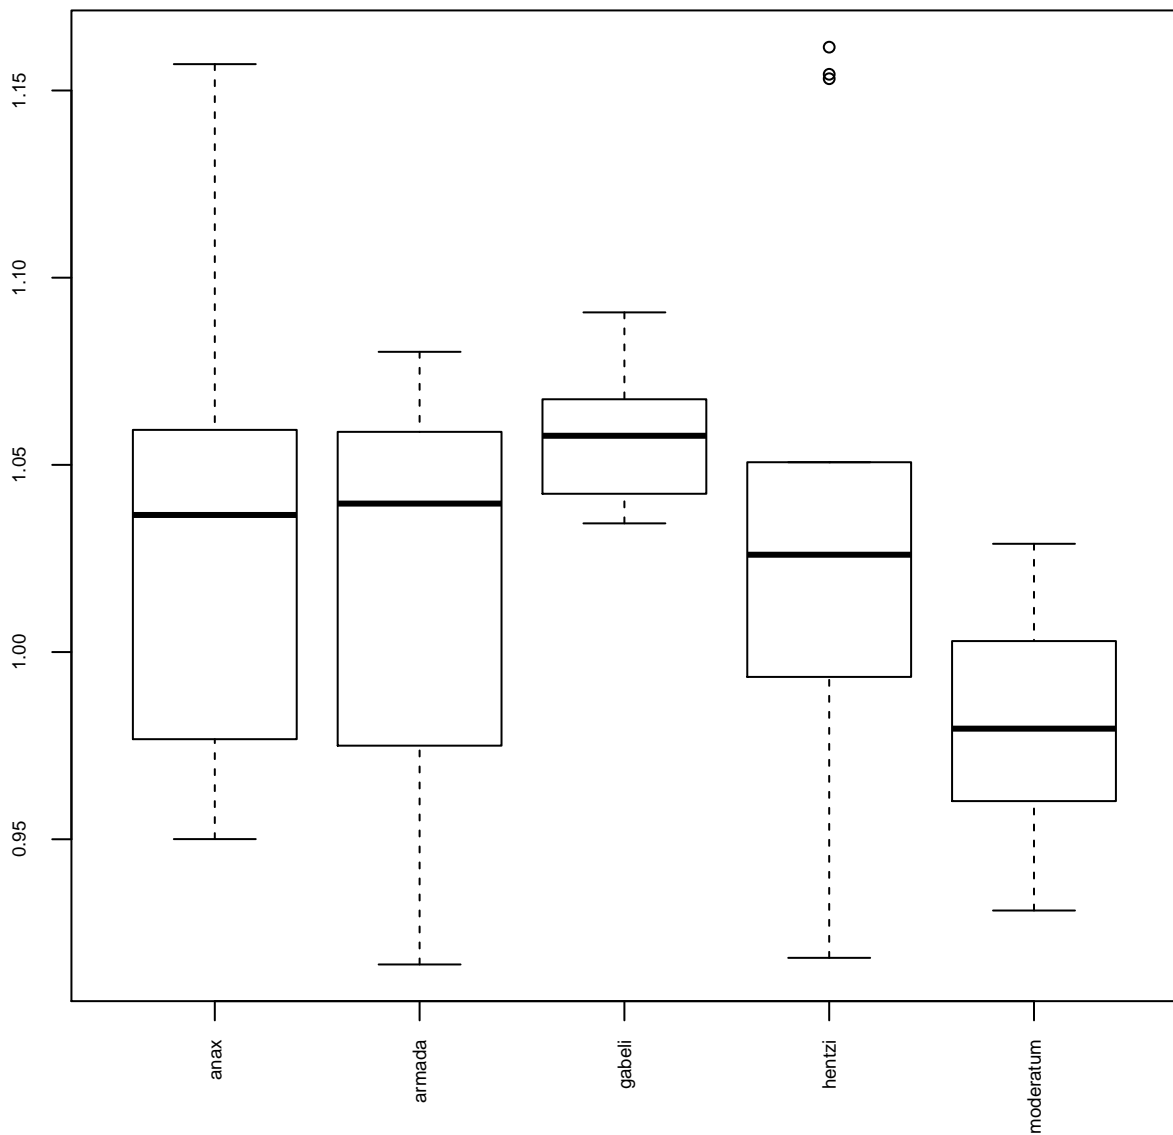

Supplement: Supplementary file 113

## Carapace Length/Femur 3 ratio – females

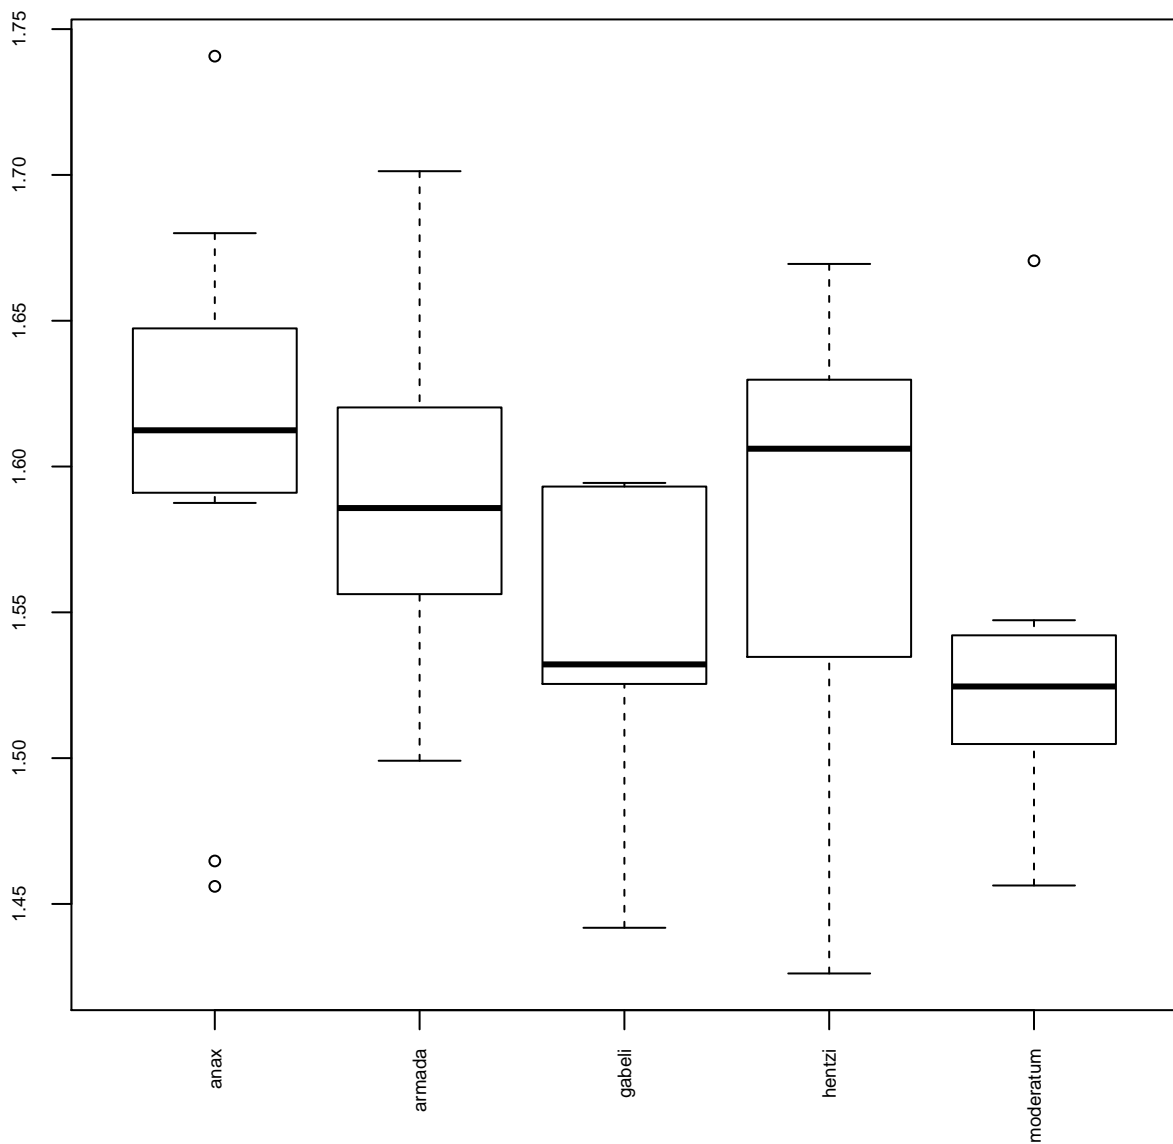

Supplement: Supplementary file 114

## Femur 1/Patella 4 ratio – females

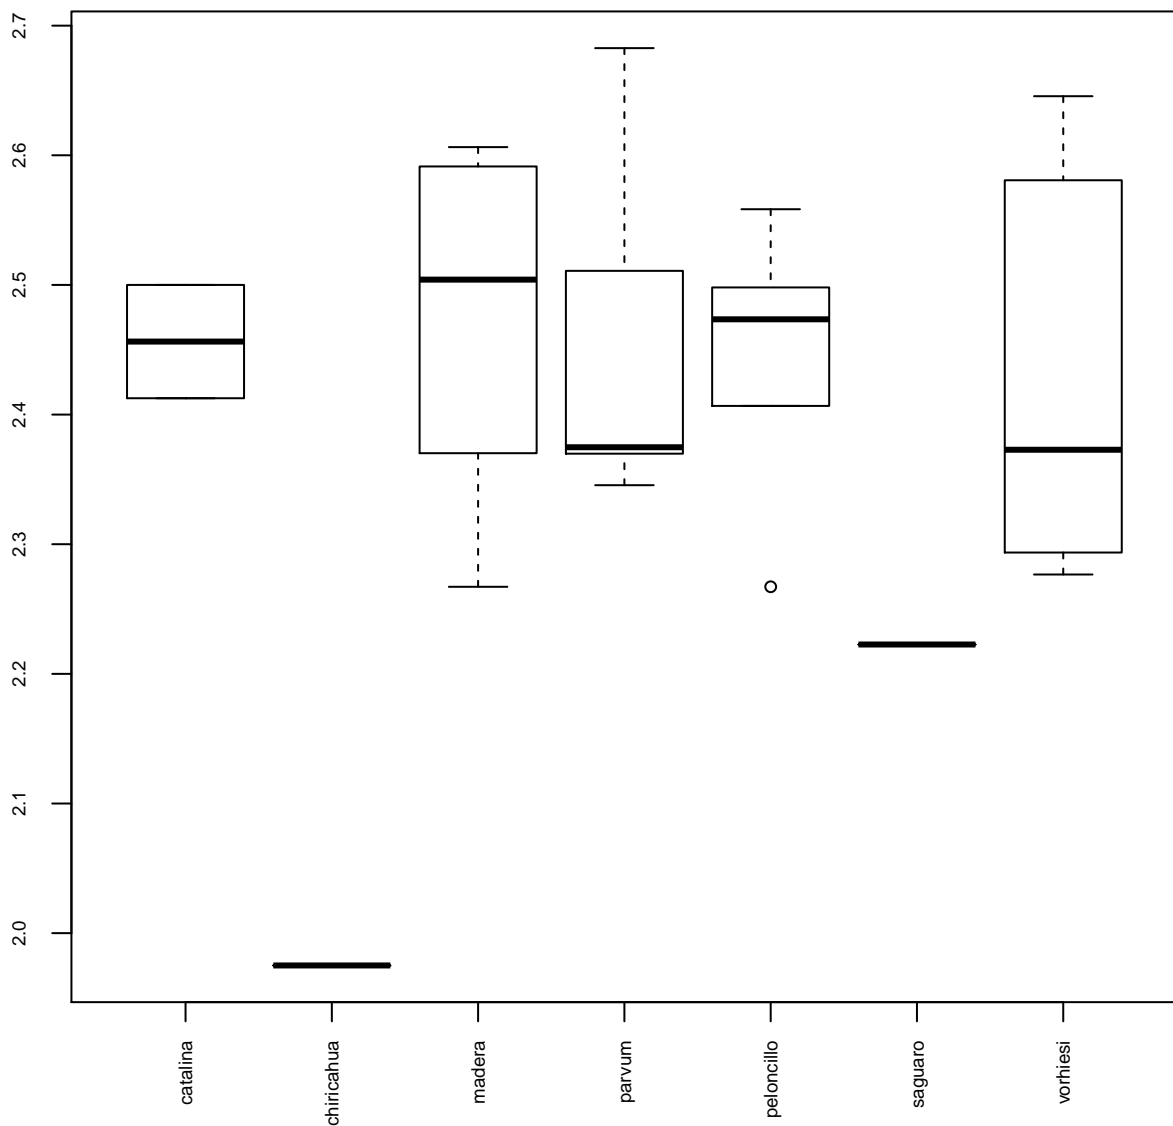

Supplement: Supplementary file 115

# Metatarsus 1/Femur 4 Length ratio – females

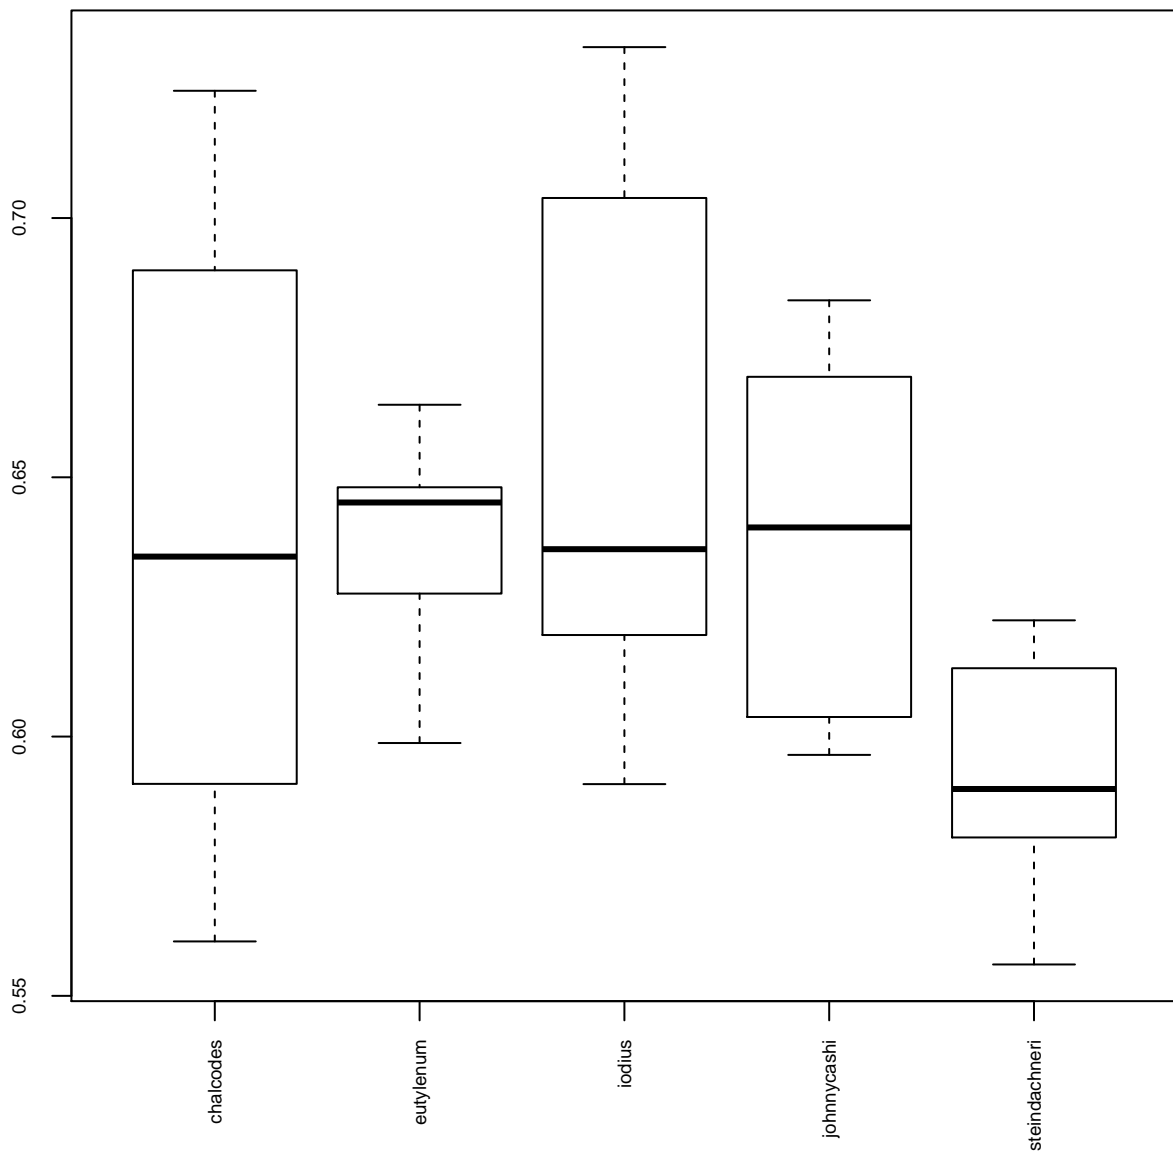

Supplement: Supplementary file 116

## Femur 1/Tibia 4 ratio – females

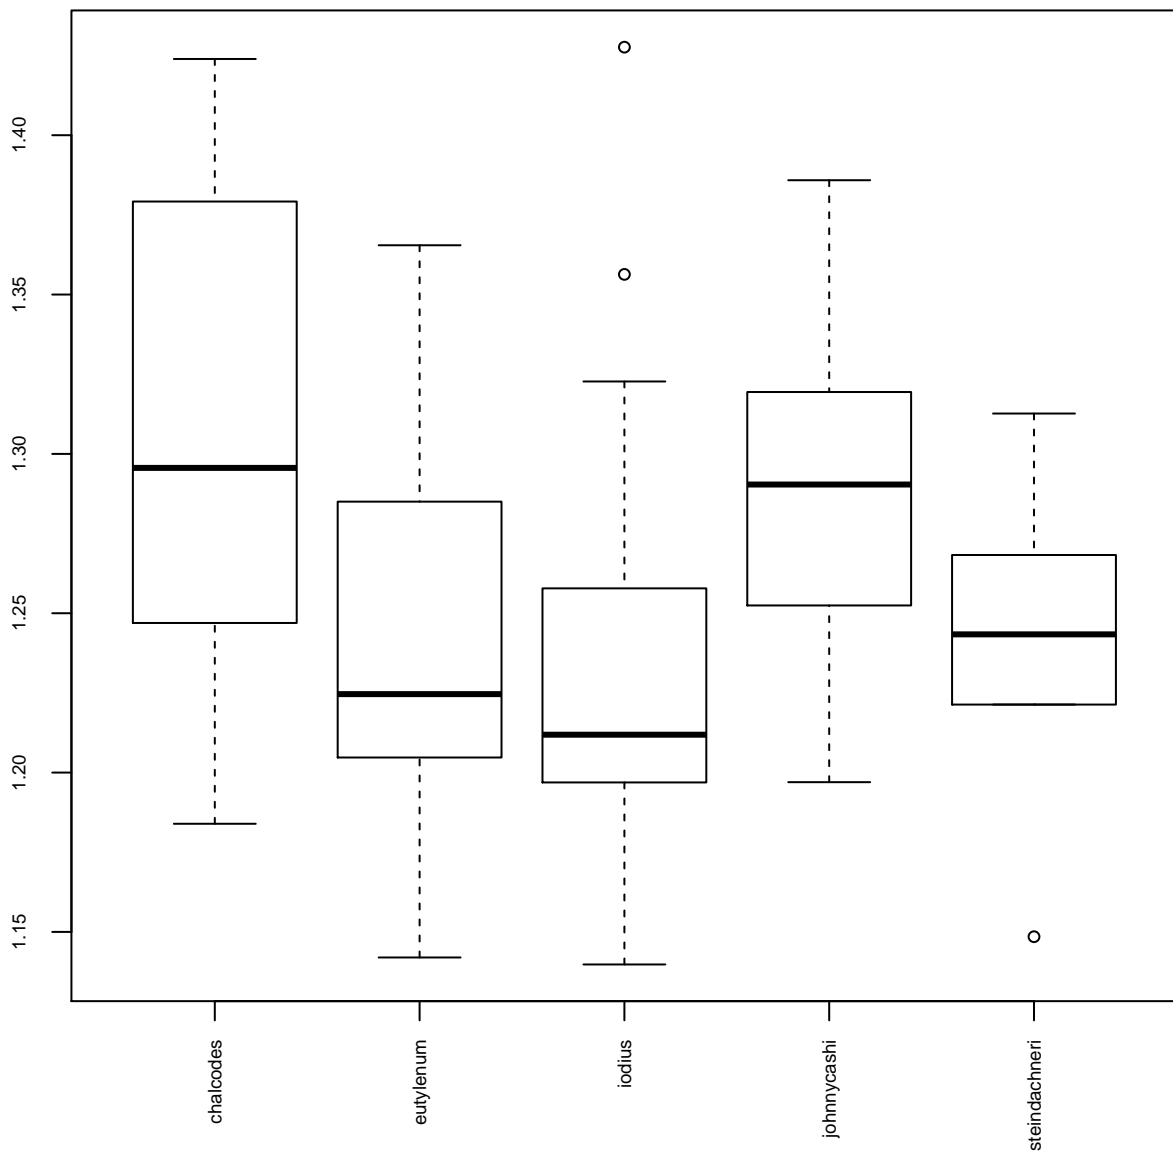

Supplement: Supplementary file 117

## Palpal Tibia/Patella 3 Length ratio – males

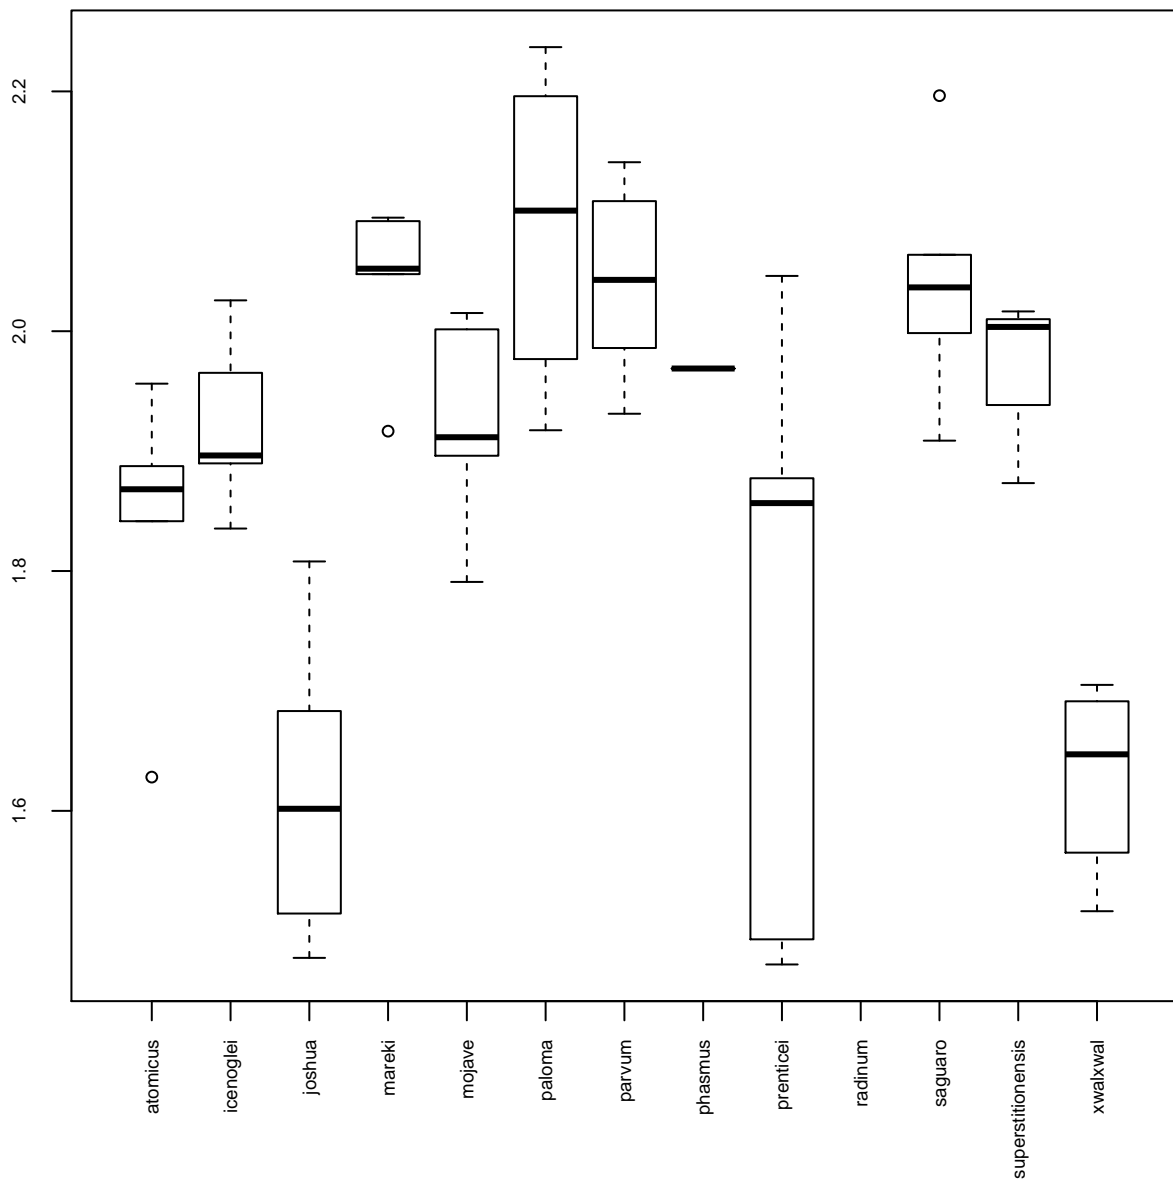

Supplement: Supplementary file 118

# Carapace Length/Tibia 1 ratio – females

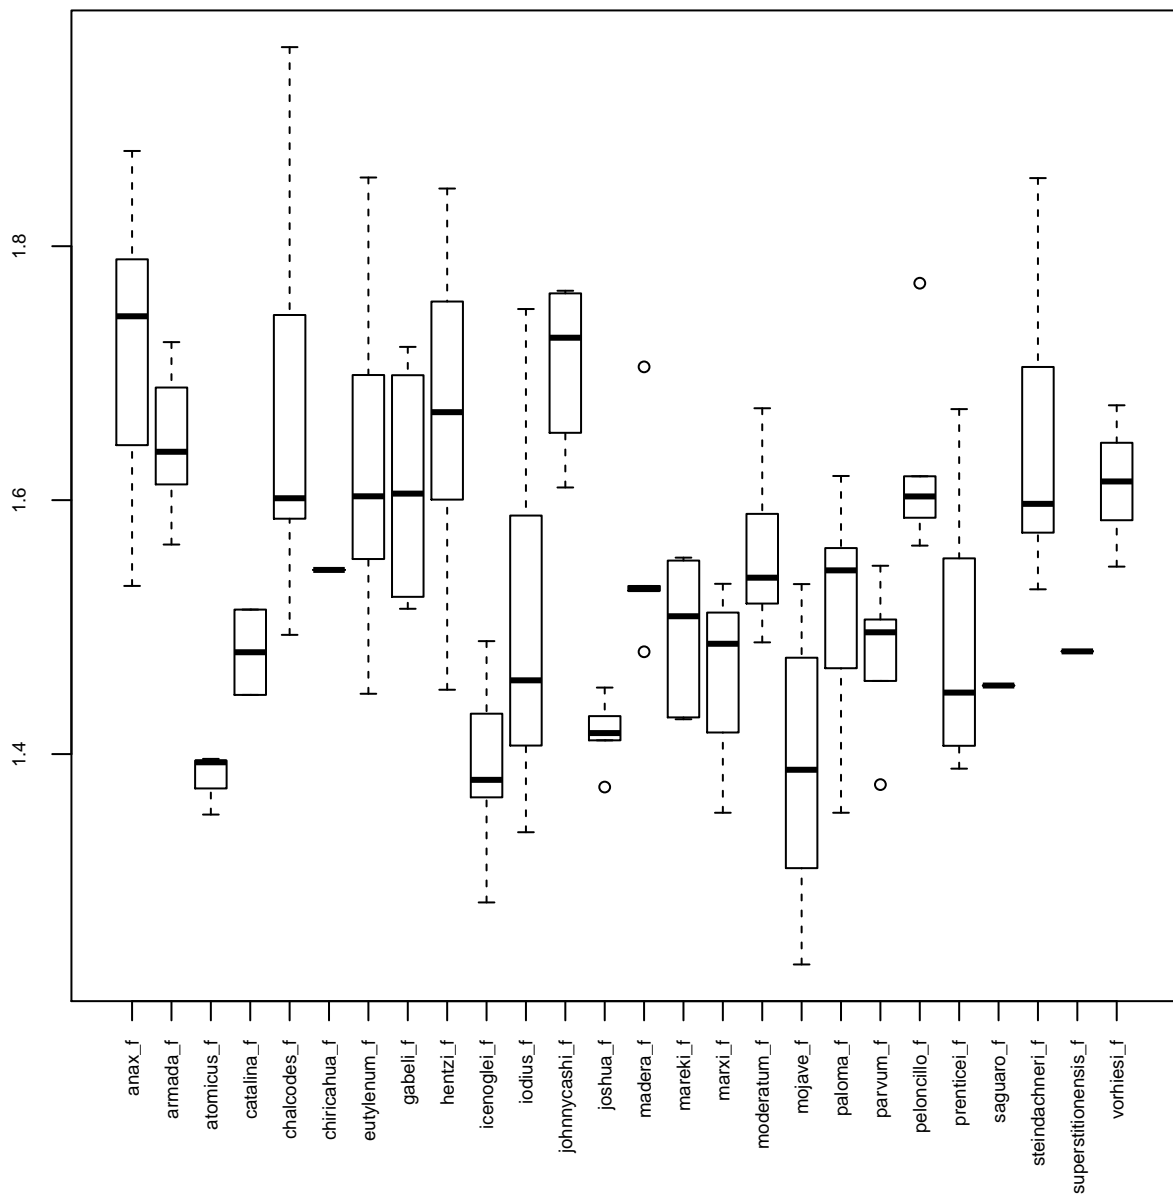

Supplement: Supplementary file 119

## Carapace Length – males

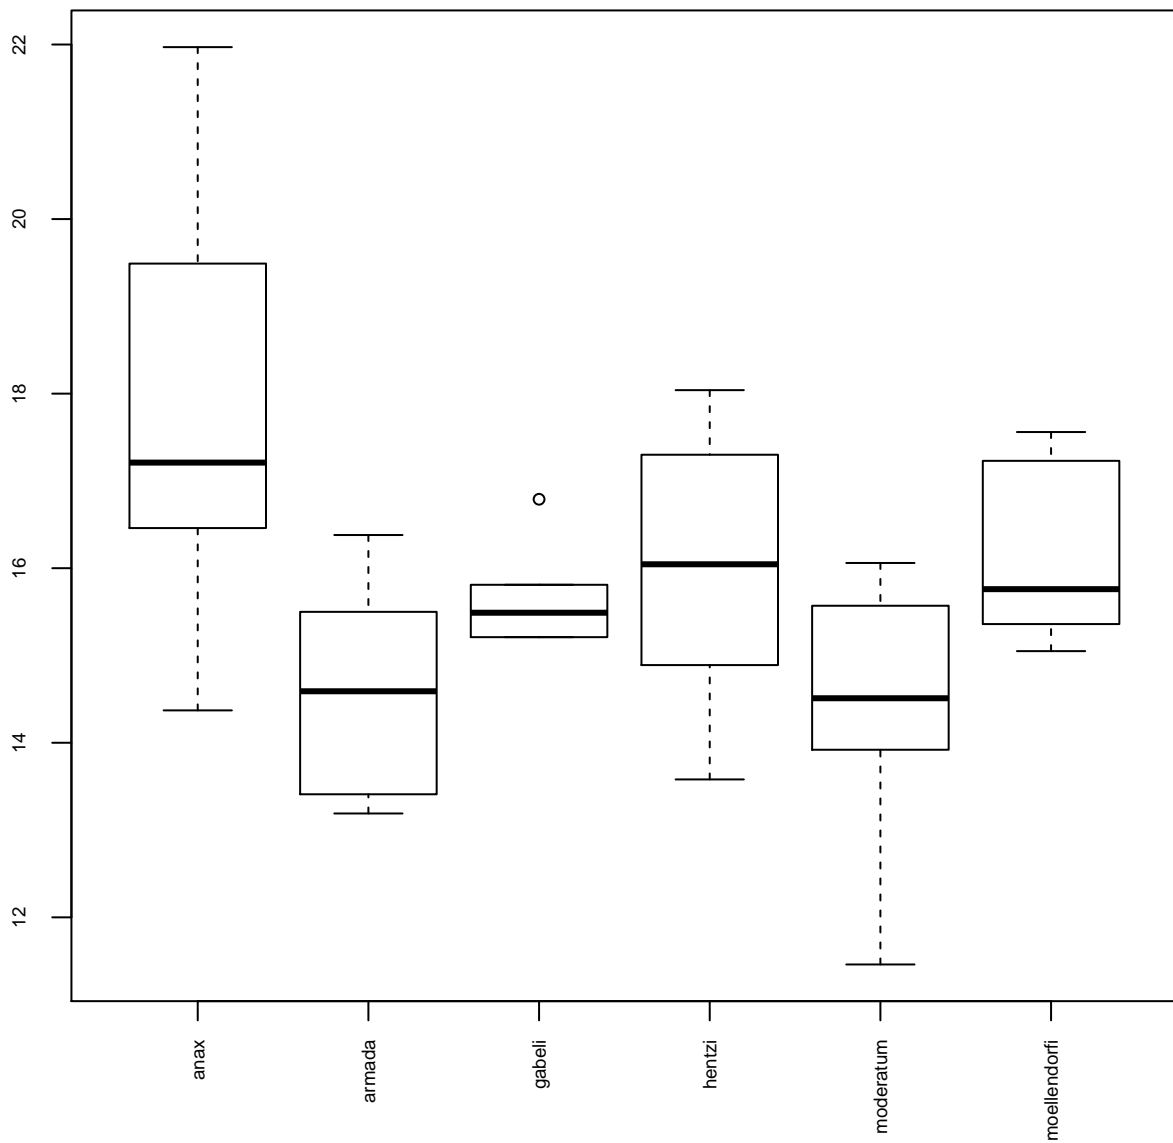

Supplement: Supplementary file 120

## Tarsus 3/Tarsus 4 ratio – females

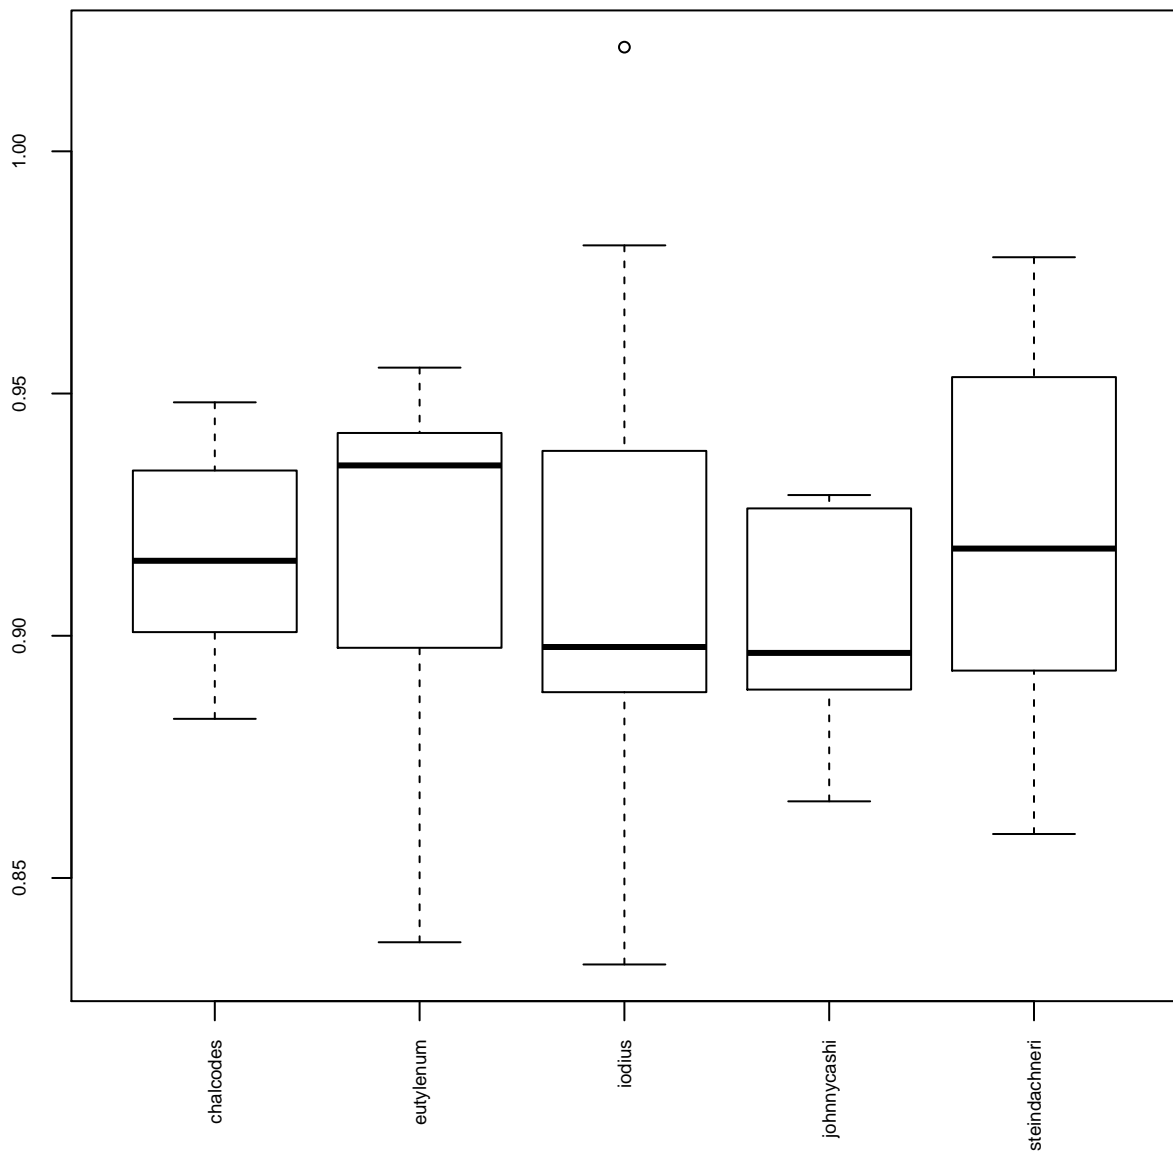

Supplement: Supplementary file 121

## Palpal Tibia/Tarsus 3 Length ratio – males

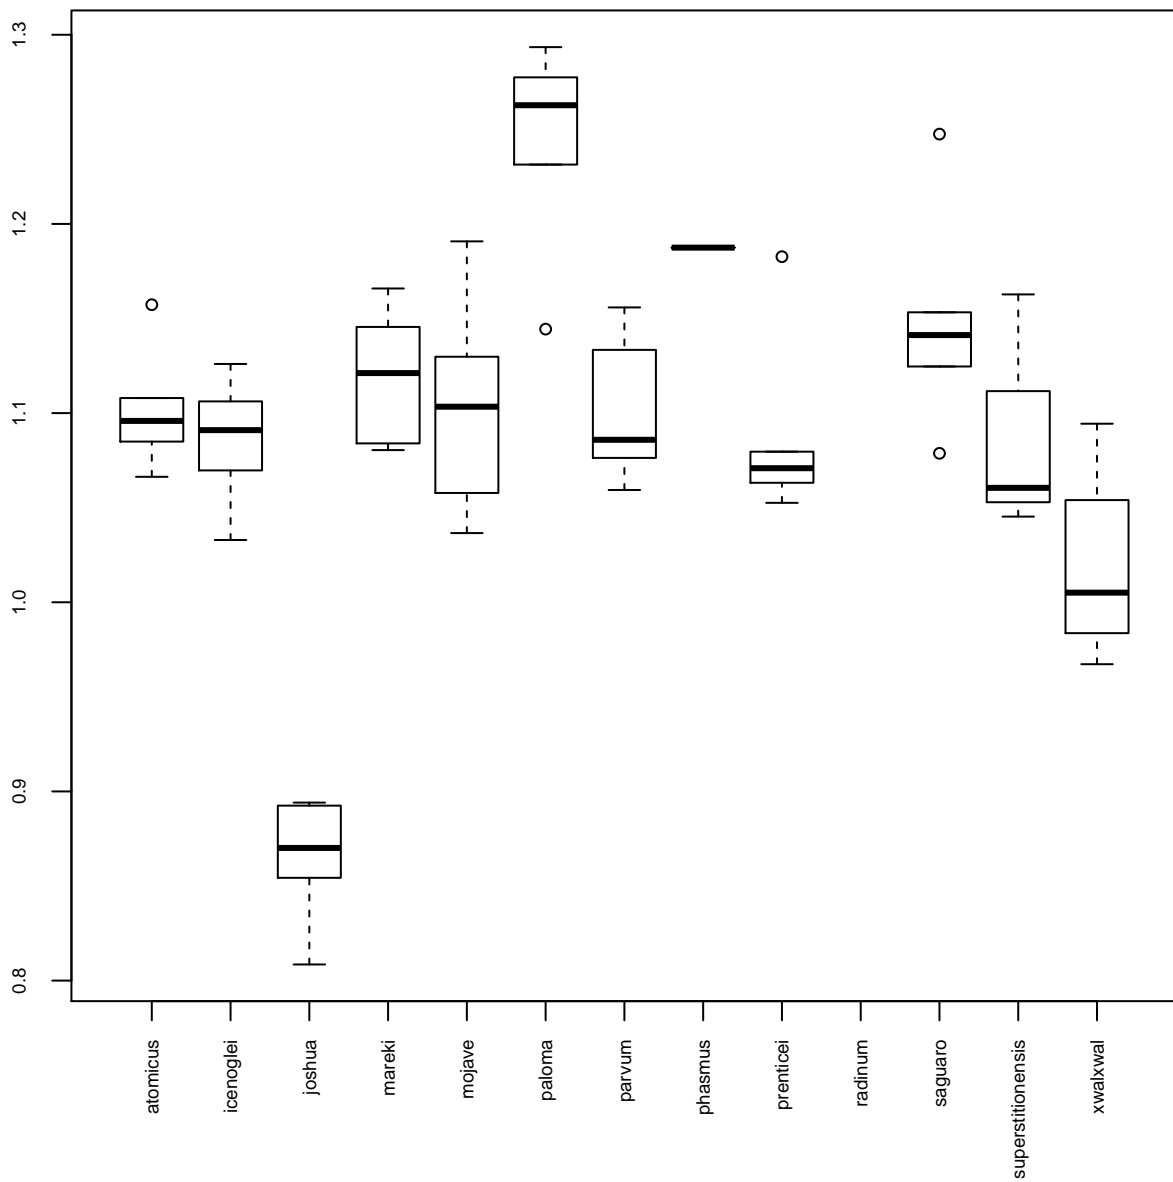

Supplement: Supplementary file 122

## Metatarsus 3/Tarsus 4 Length ratio – females

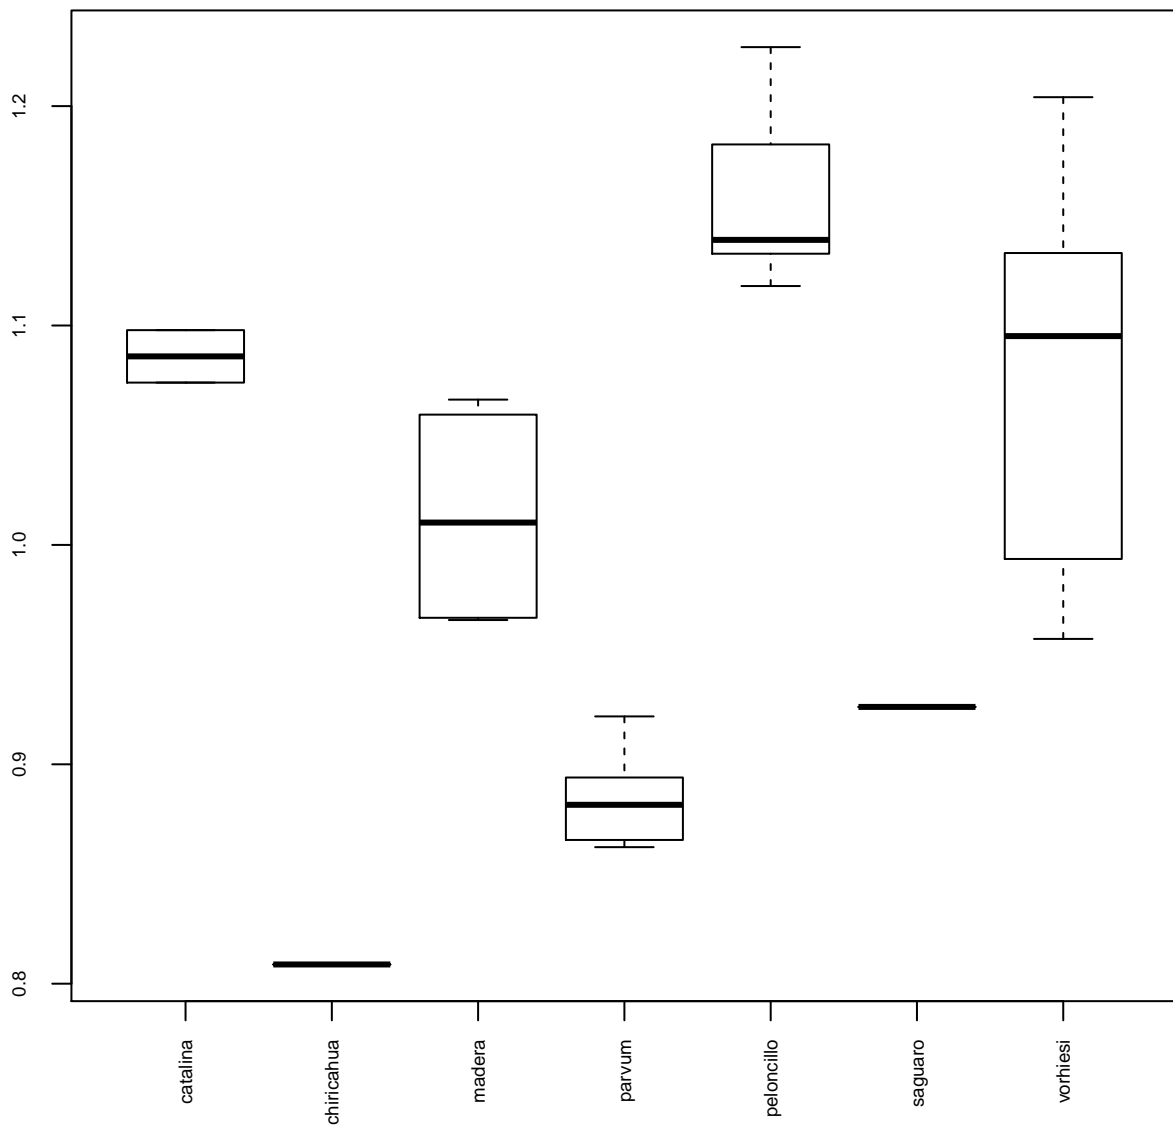

Supplement: Supplementary file 123

## Carapace Length/Tarsus 4 ratio – females

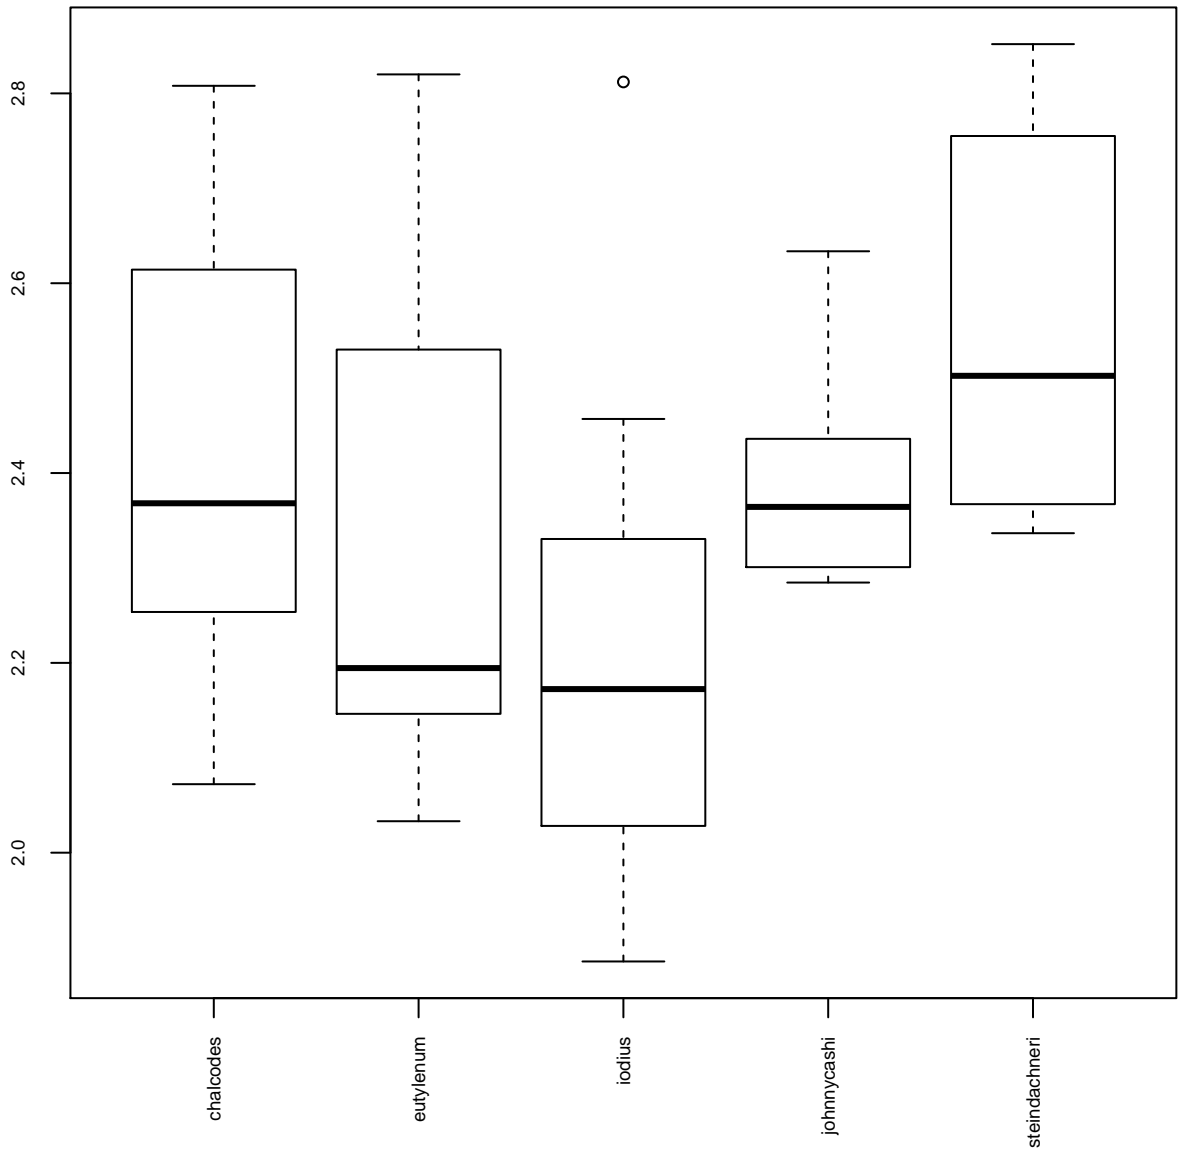

Supplement: Supplementary file 124

## Tibia 1/Metatarsus 1 ratio – females

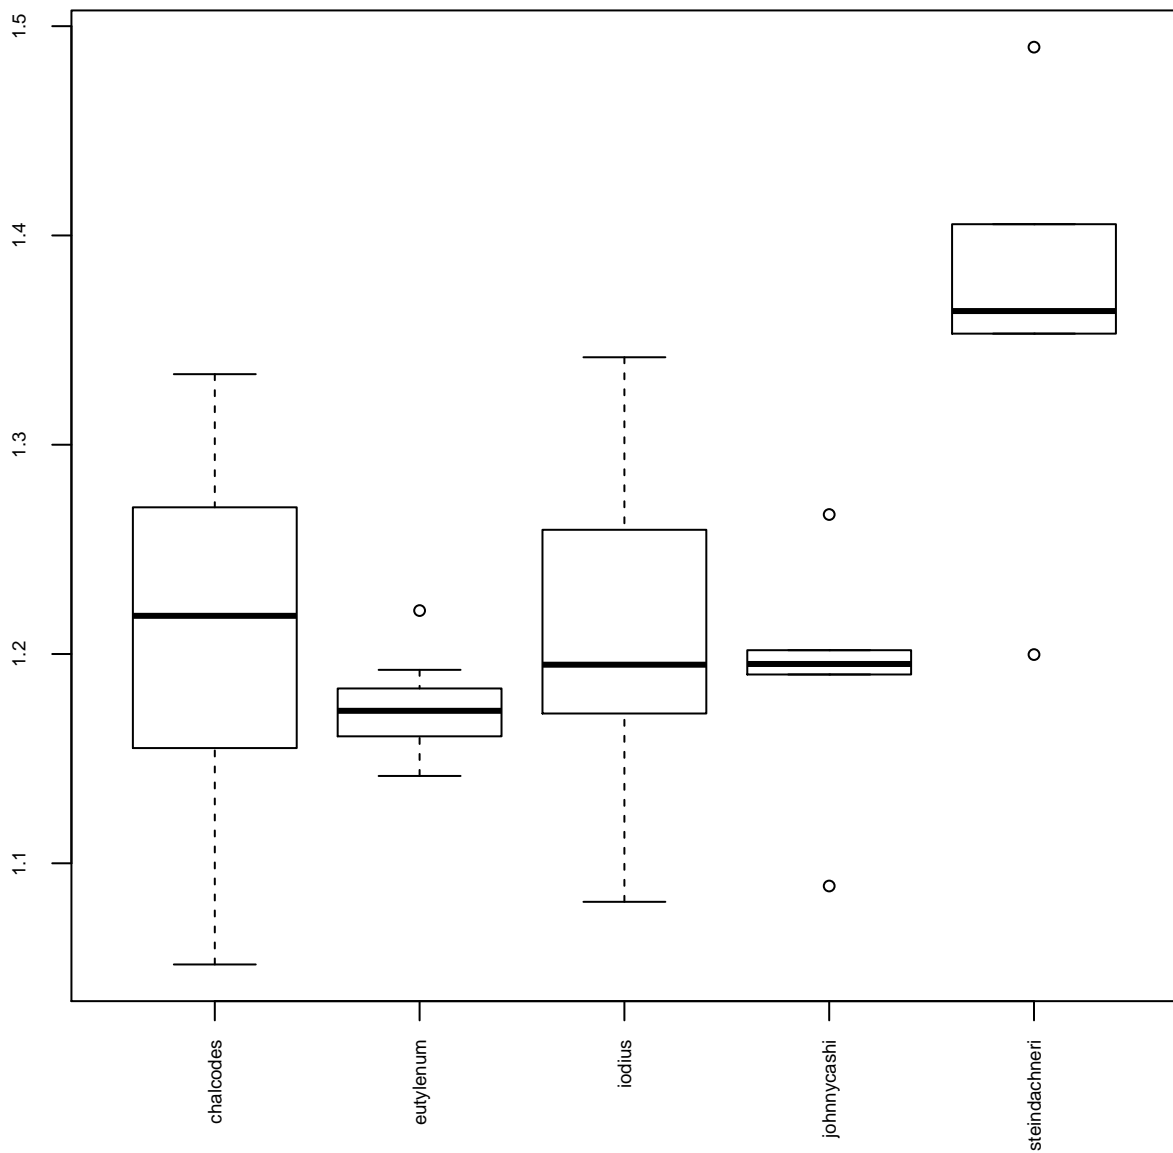

Supplement: Supplementary file 125

## Tarsus 1/Metatarsus 4 Length ratio – females

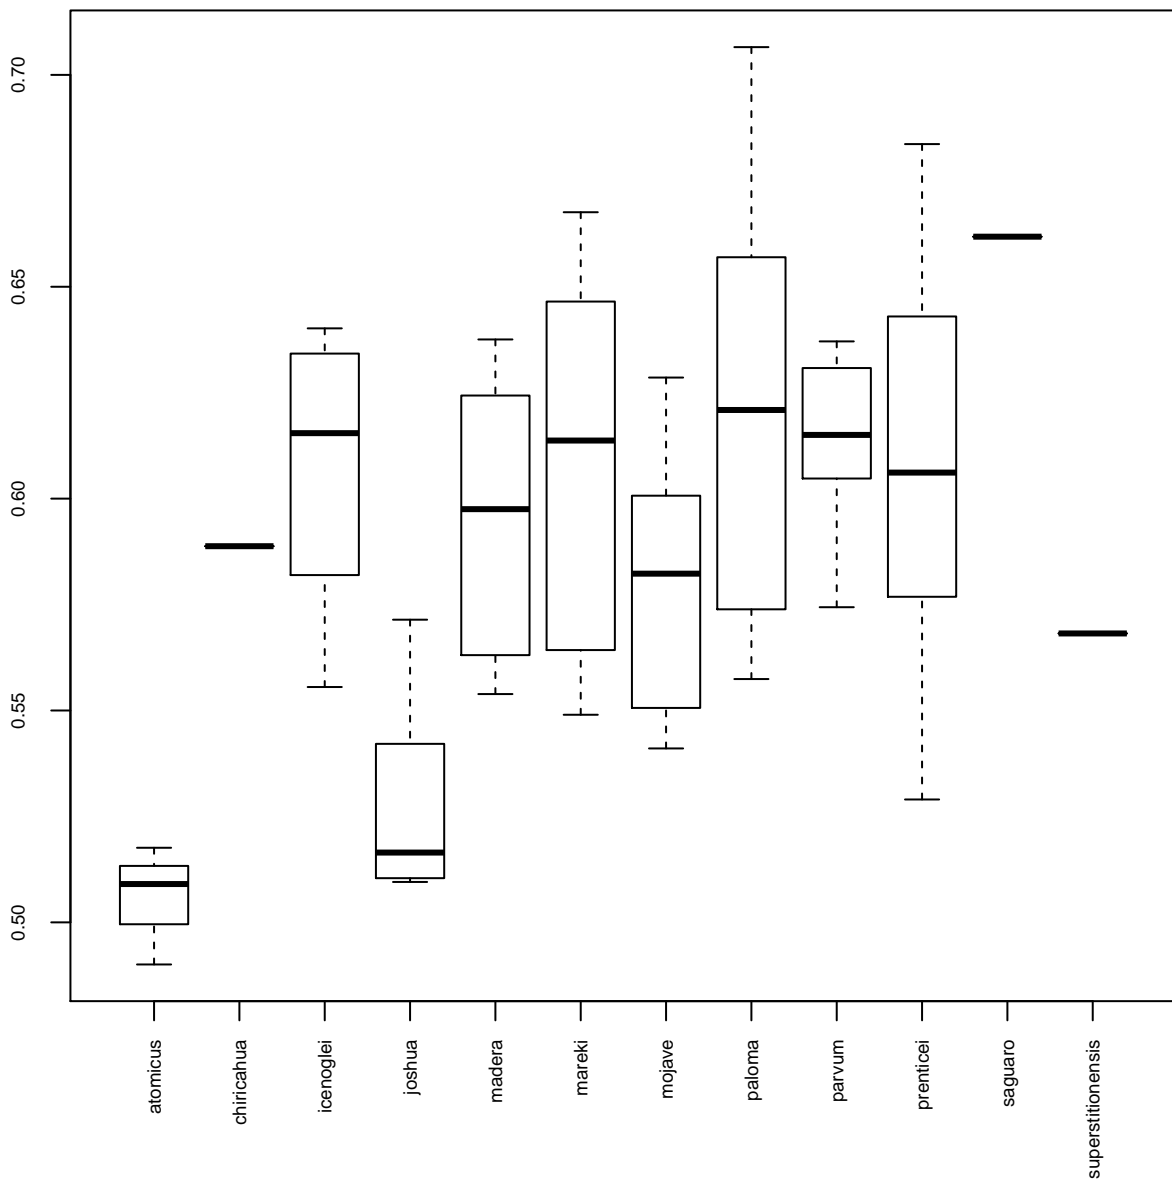

Supplement: Supplementary file 126

## Leg 1/Leg 4 Length ratio – females

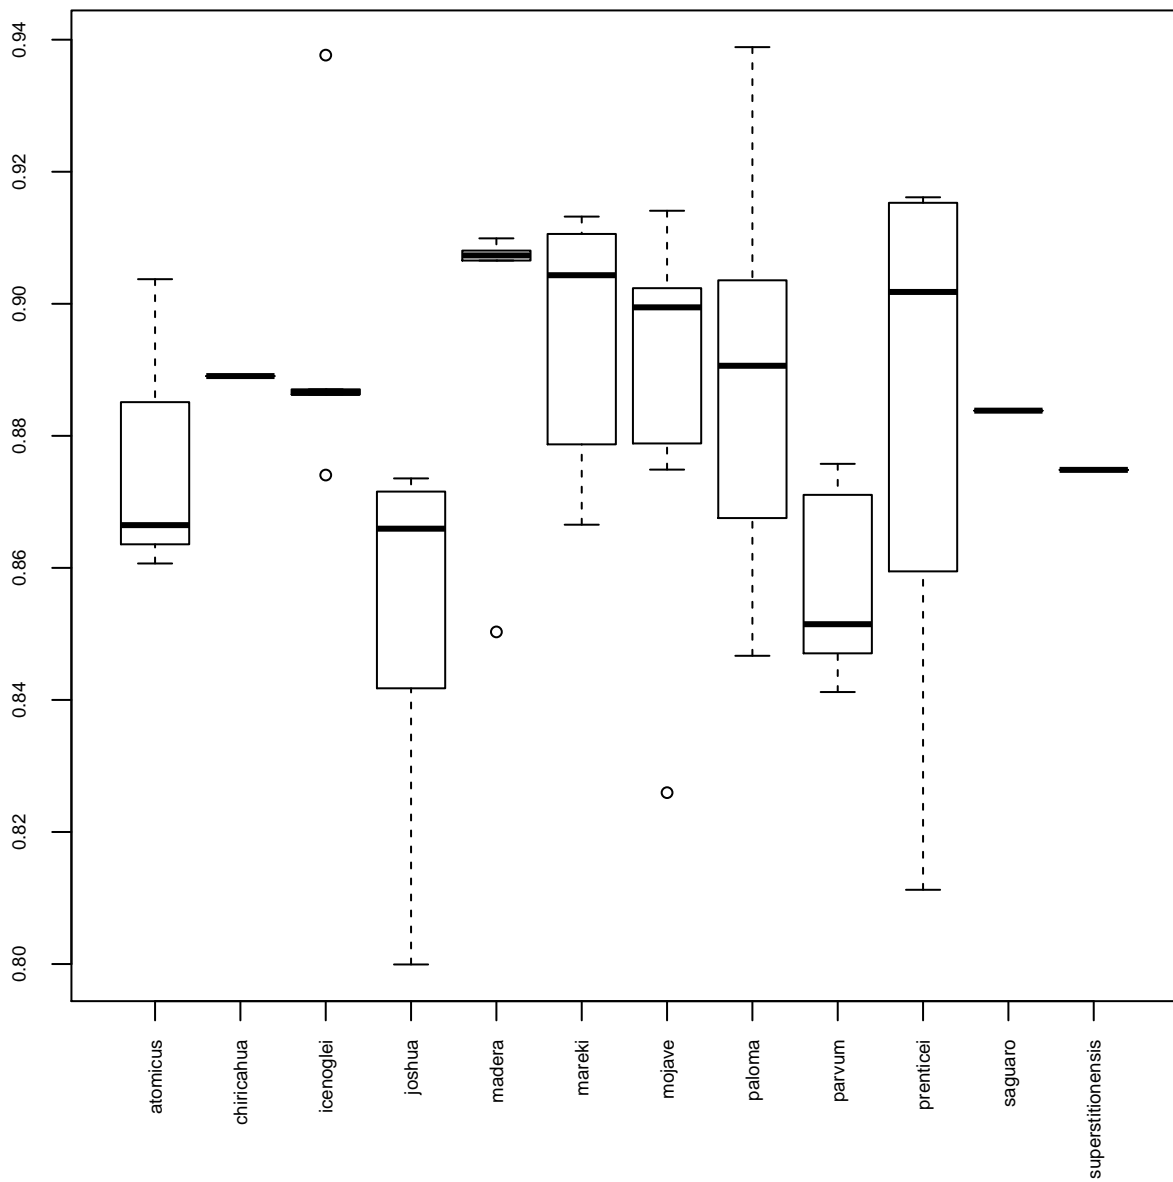

Supplement: Supplementary file 127

## Palpal Tibia/Femur 1 Length ratio – males

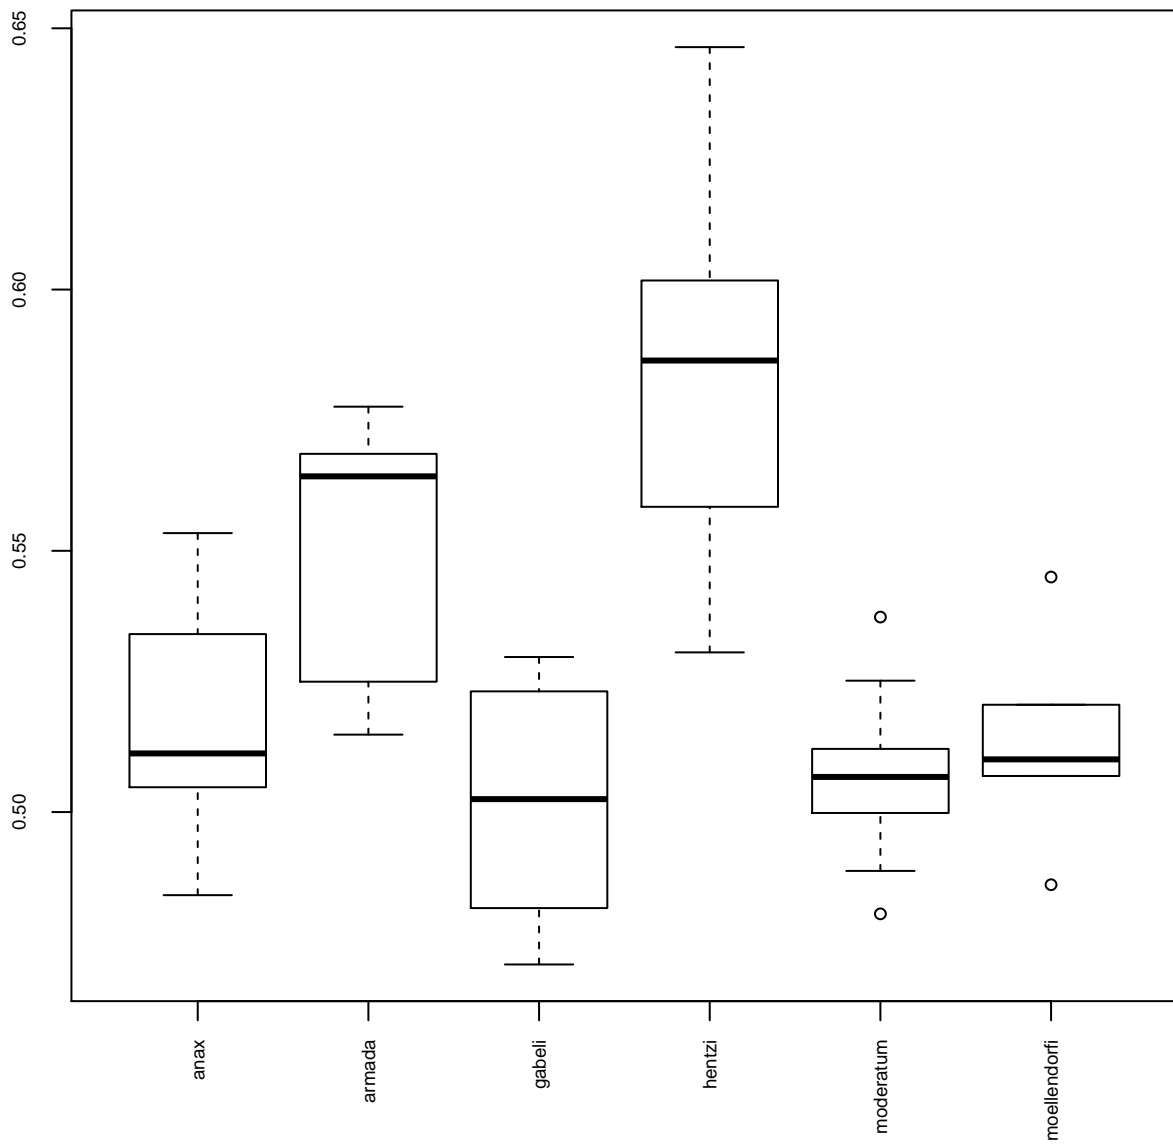

Supplement: Supplementary file 128

## Patella 3/Tibia 4 Length ratio – females

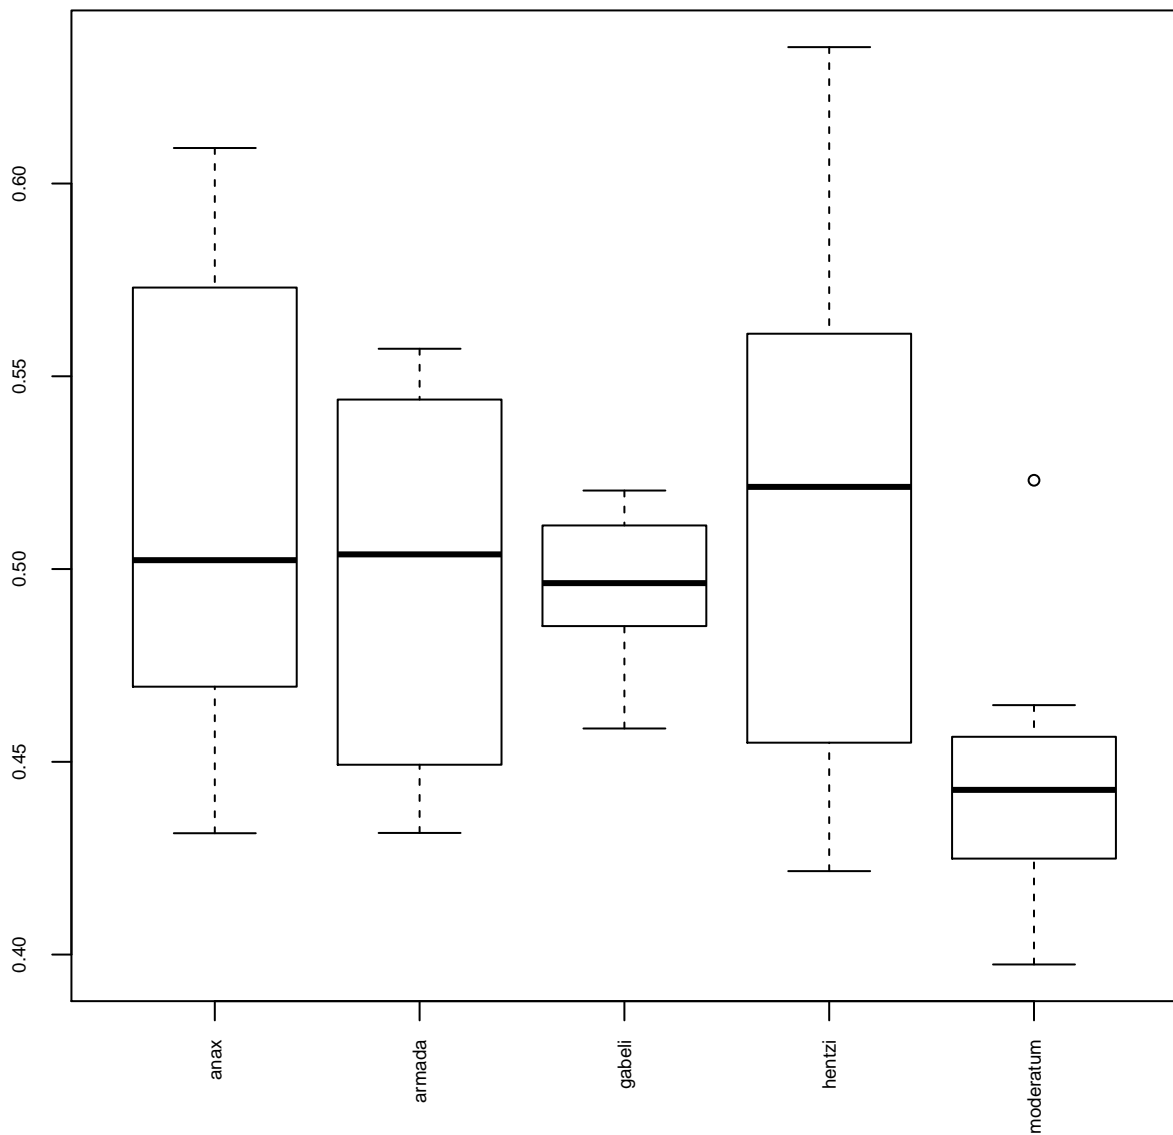

Supplement: Supplementary file 129

# Palpal Tibia/Metatarsus 1 Length ratio – males

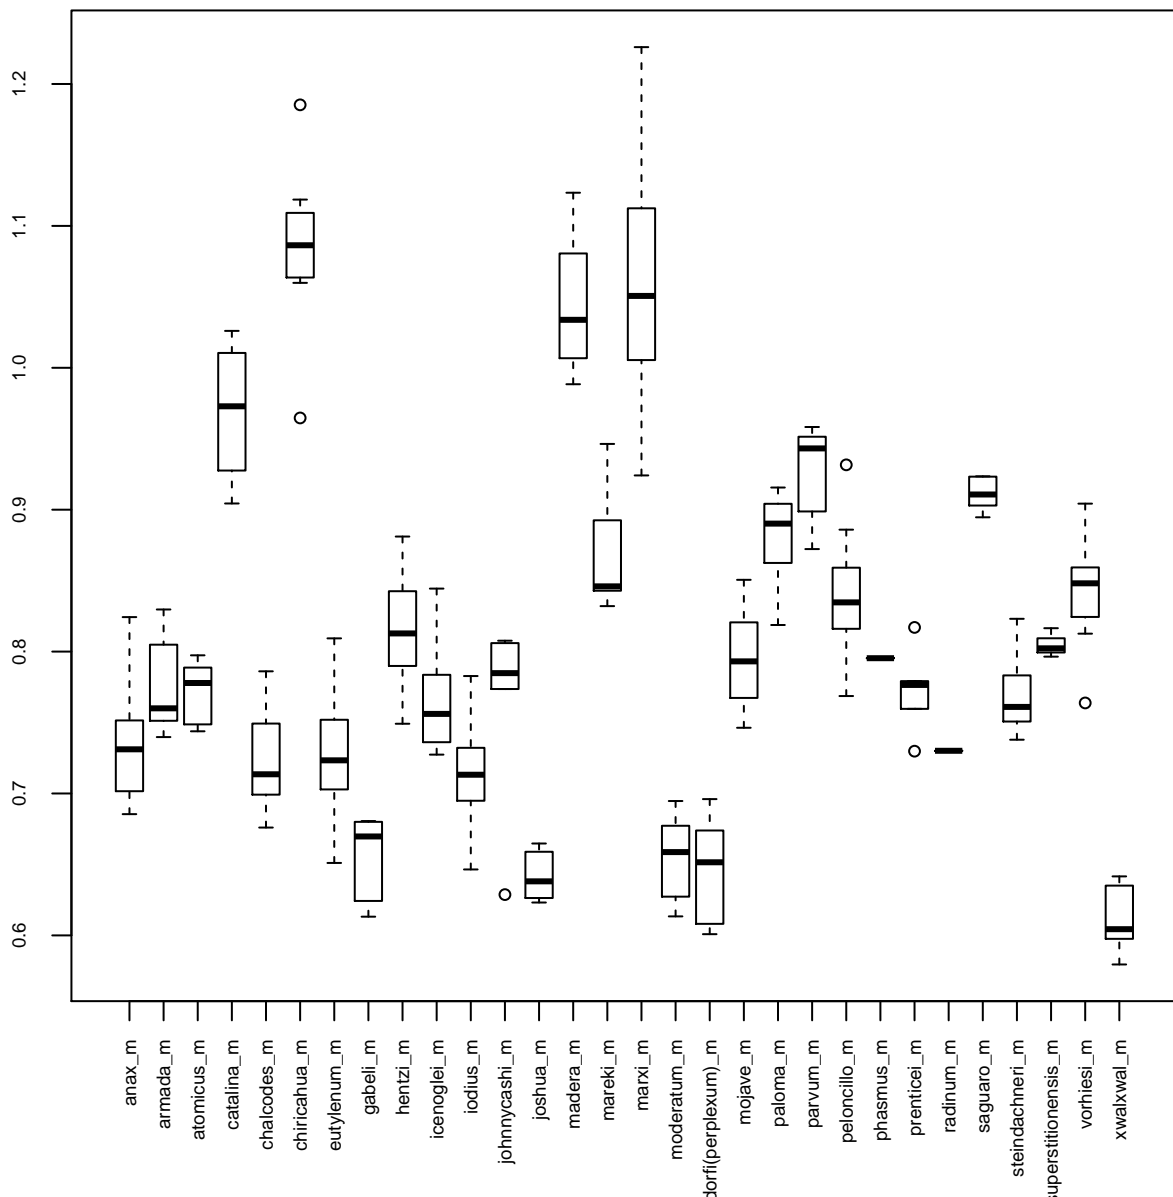

Supplement: Supplementary file 130

## Metatarsus 4/Tarsus 4 ratio – males

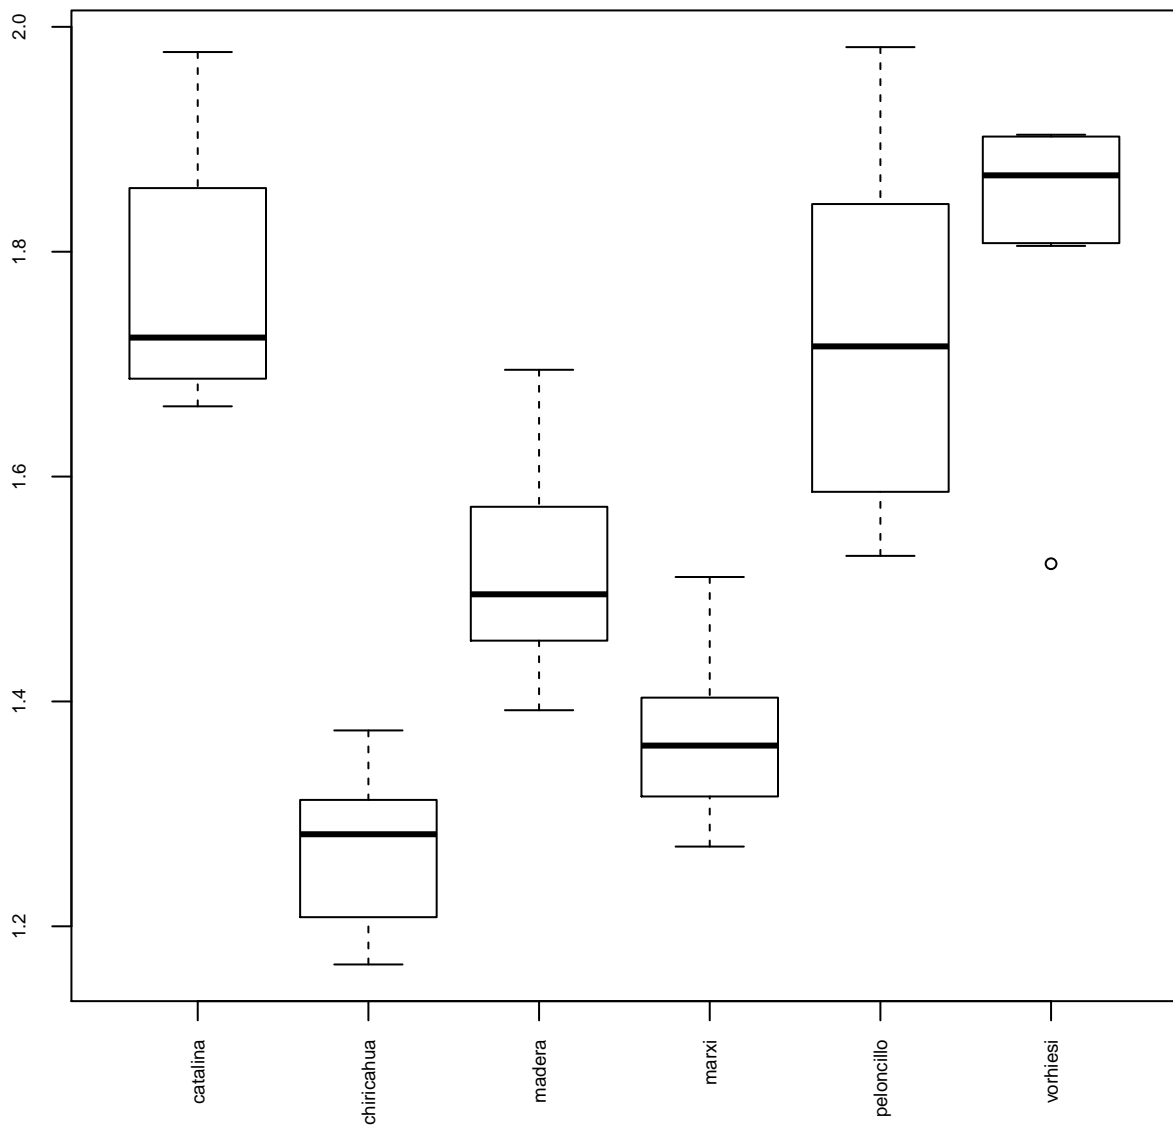

Supplement: Supplementary file 131

## Metatarsus 1/Tibia 4 Length ratio – females

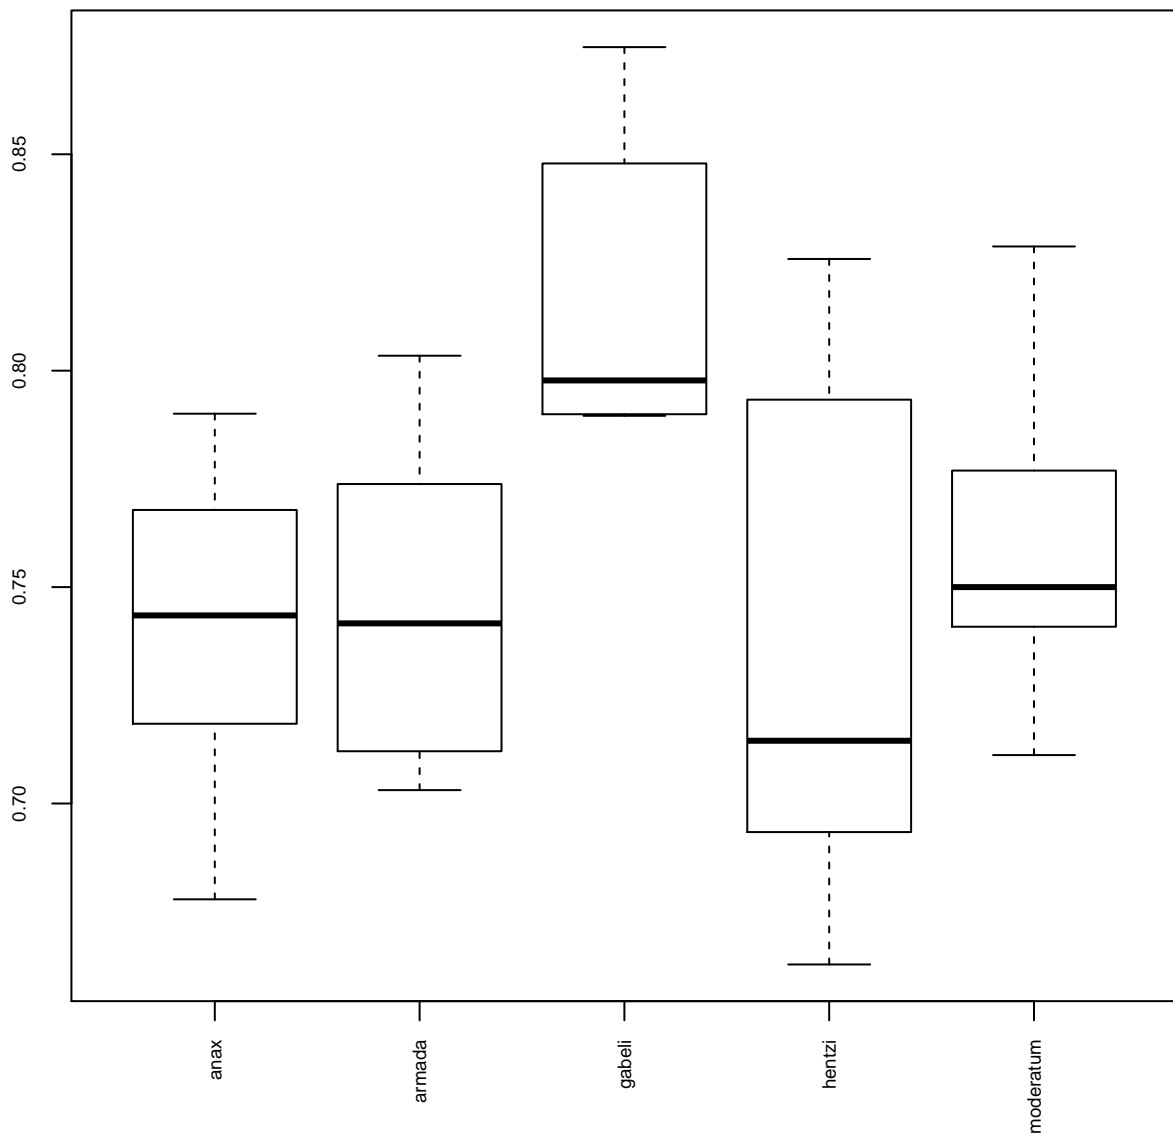

Supplement: Supplementary file 132

# Palpal Tibia/Femur 3 Length ratio – males

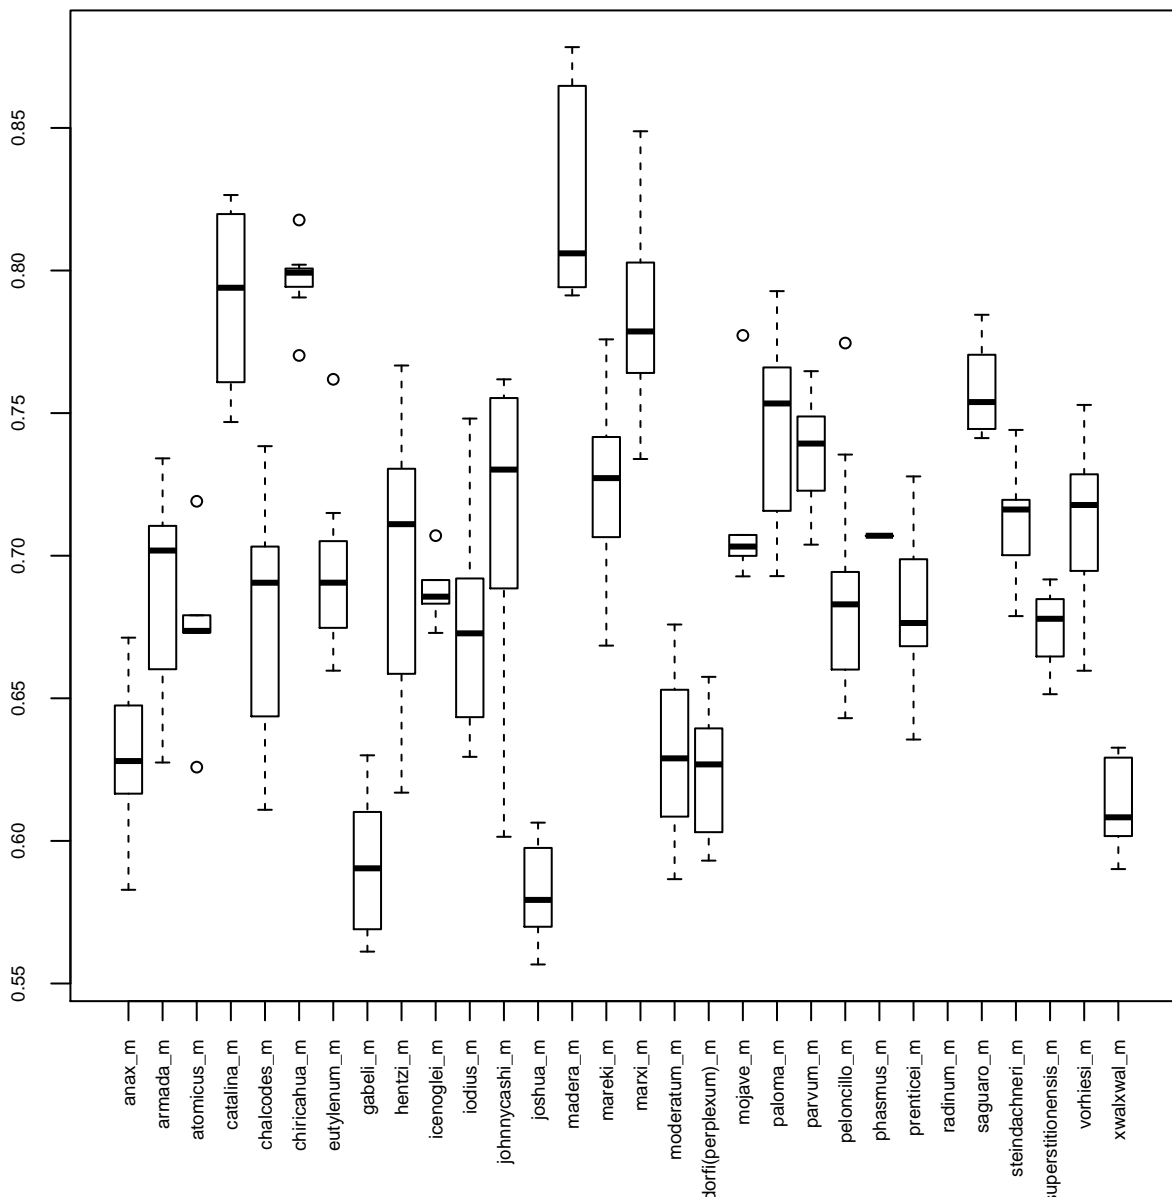

Supplement: Supplementary file 133

## Metatarsus 3/Tarsus 4 Length ratio – females

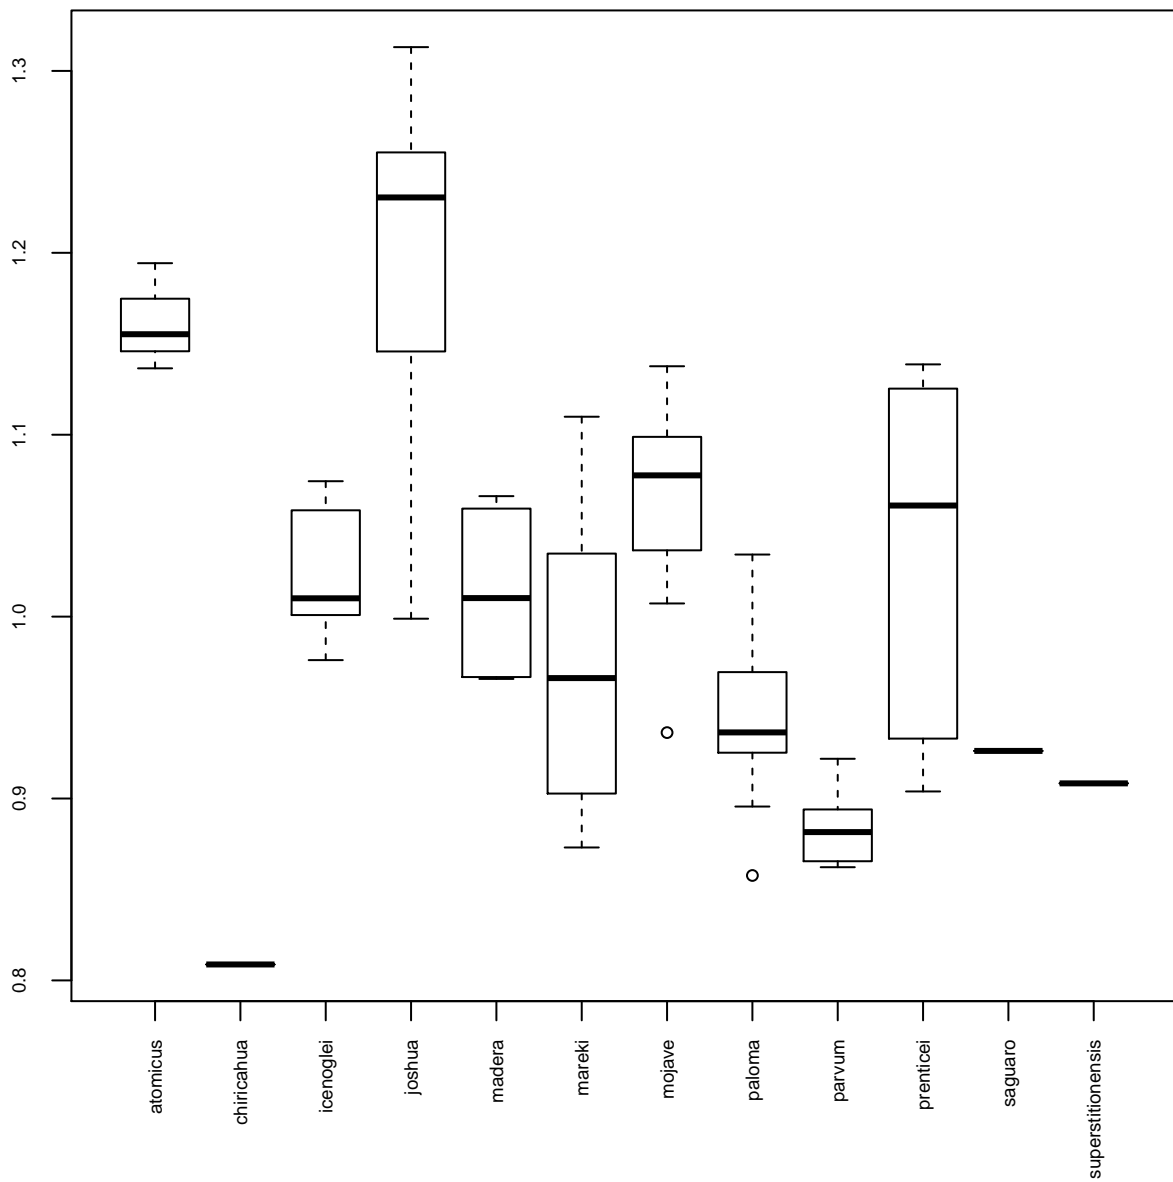

Supplement: Supplementary file 134

## Tibia 3/Tarsus 4 Length ratio – females

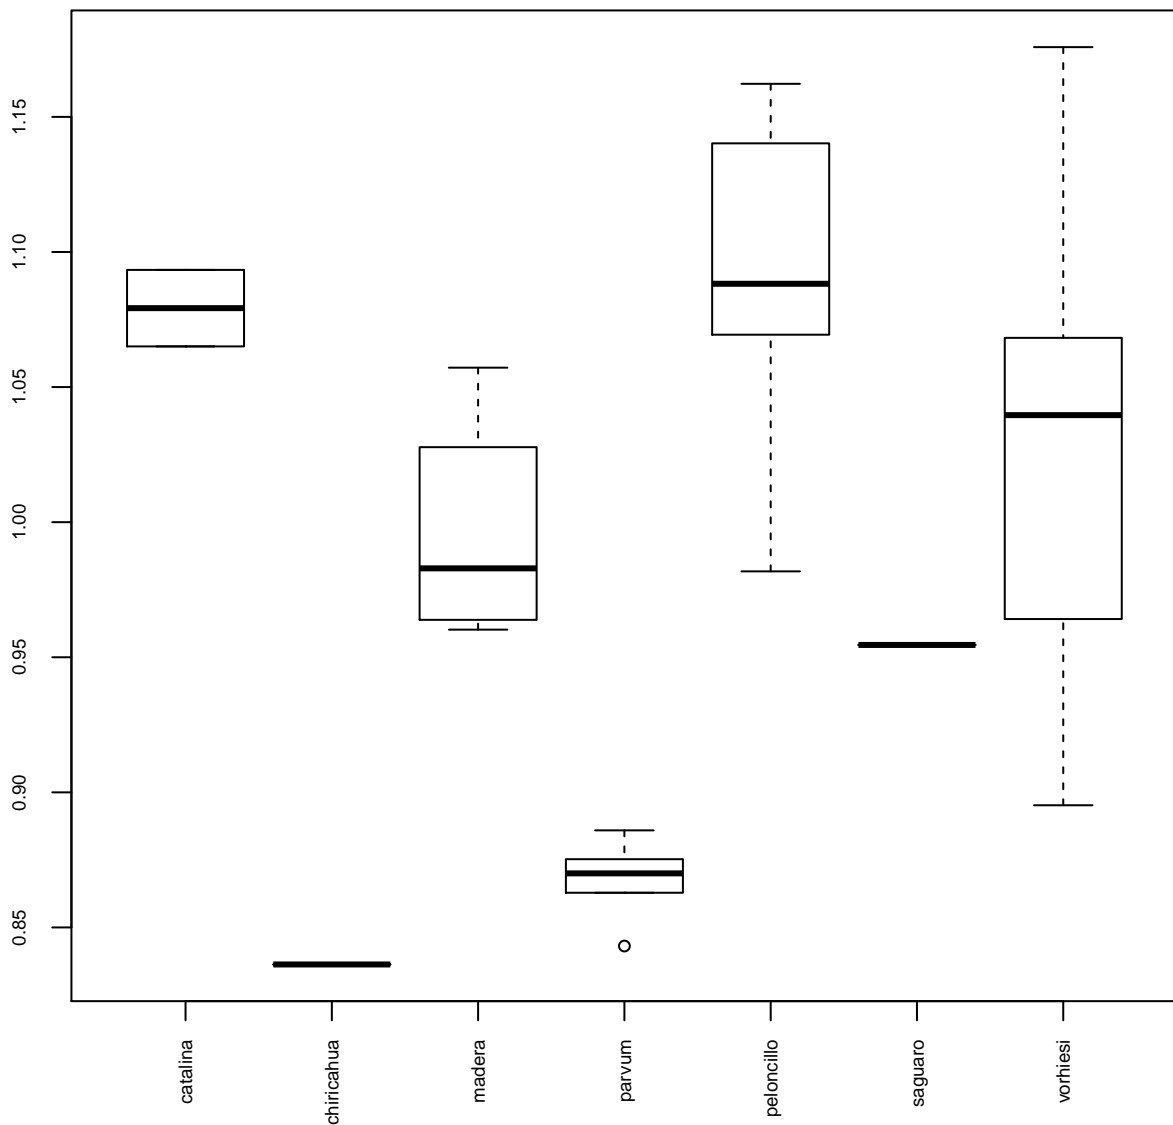

Supplement: Supplementary file 135

## Palpal Tibia/Patella 4 Length ratio – males

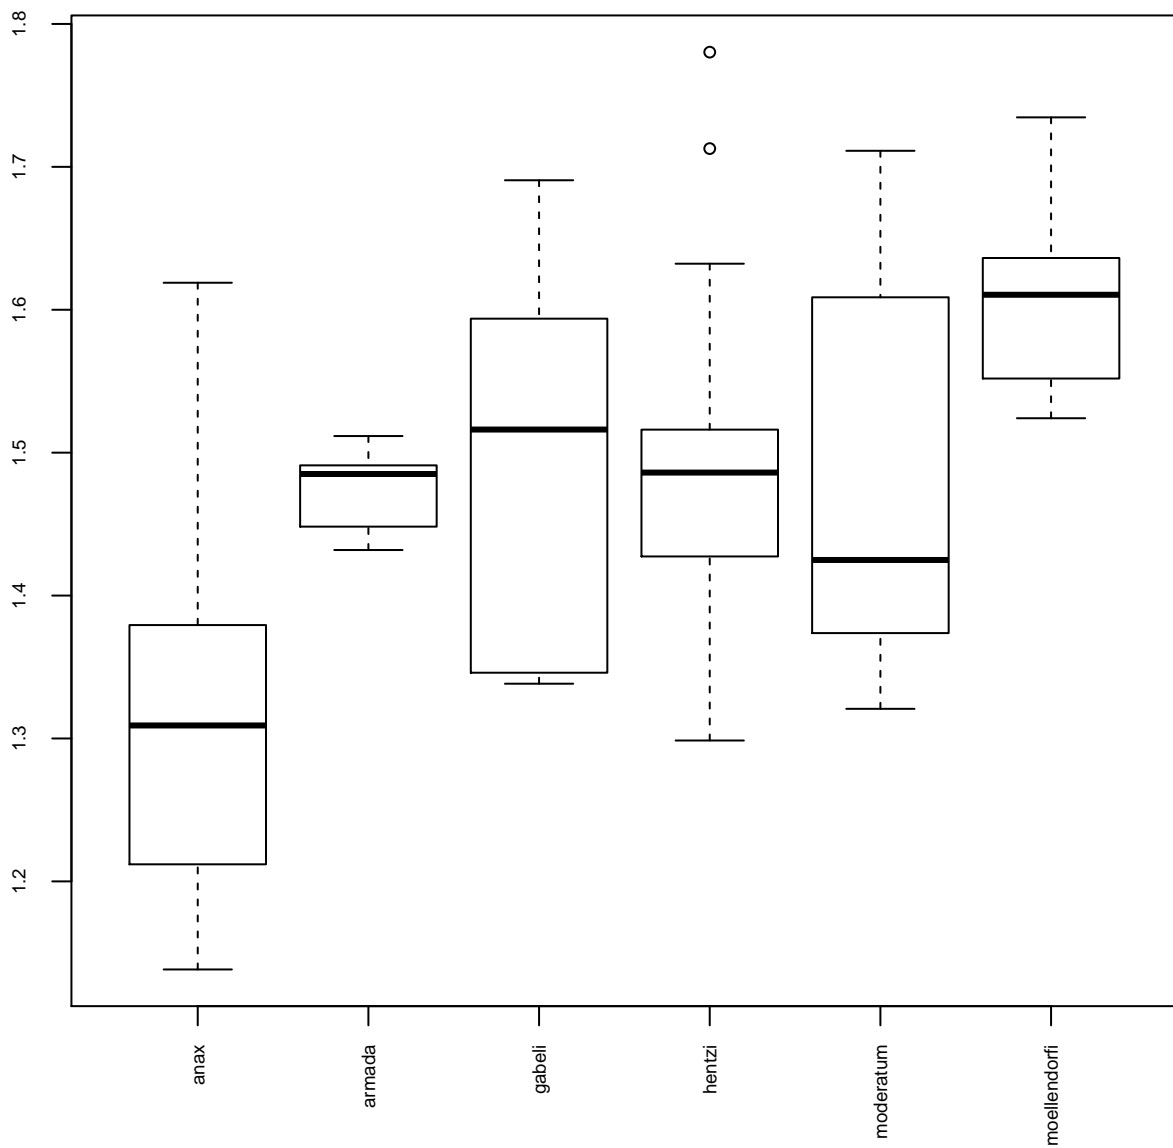

Supplement: Supplementary file 136

## Metatarsus 1/Patella 3 Length ratio – females

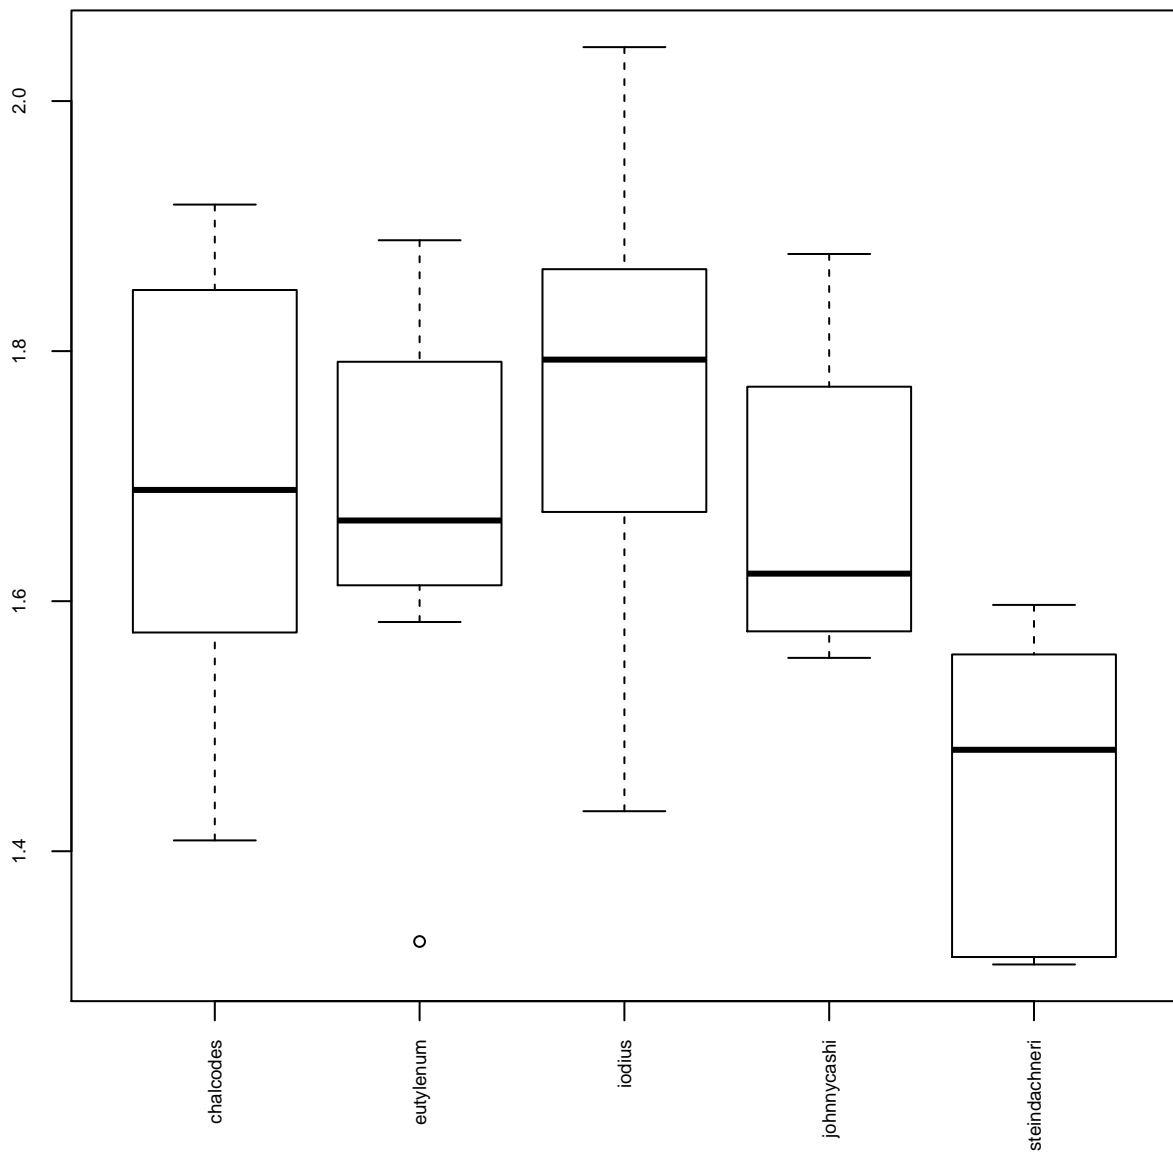

Supplement: Supplementary file 137

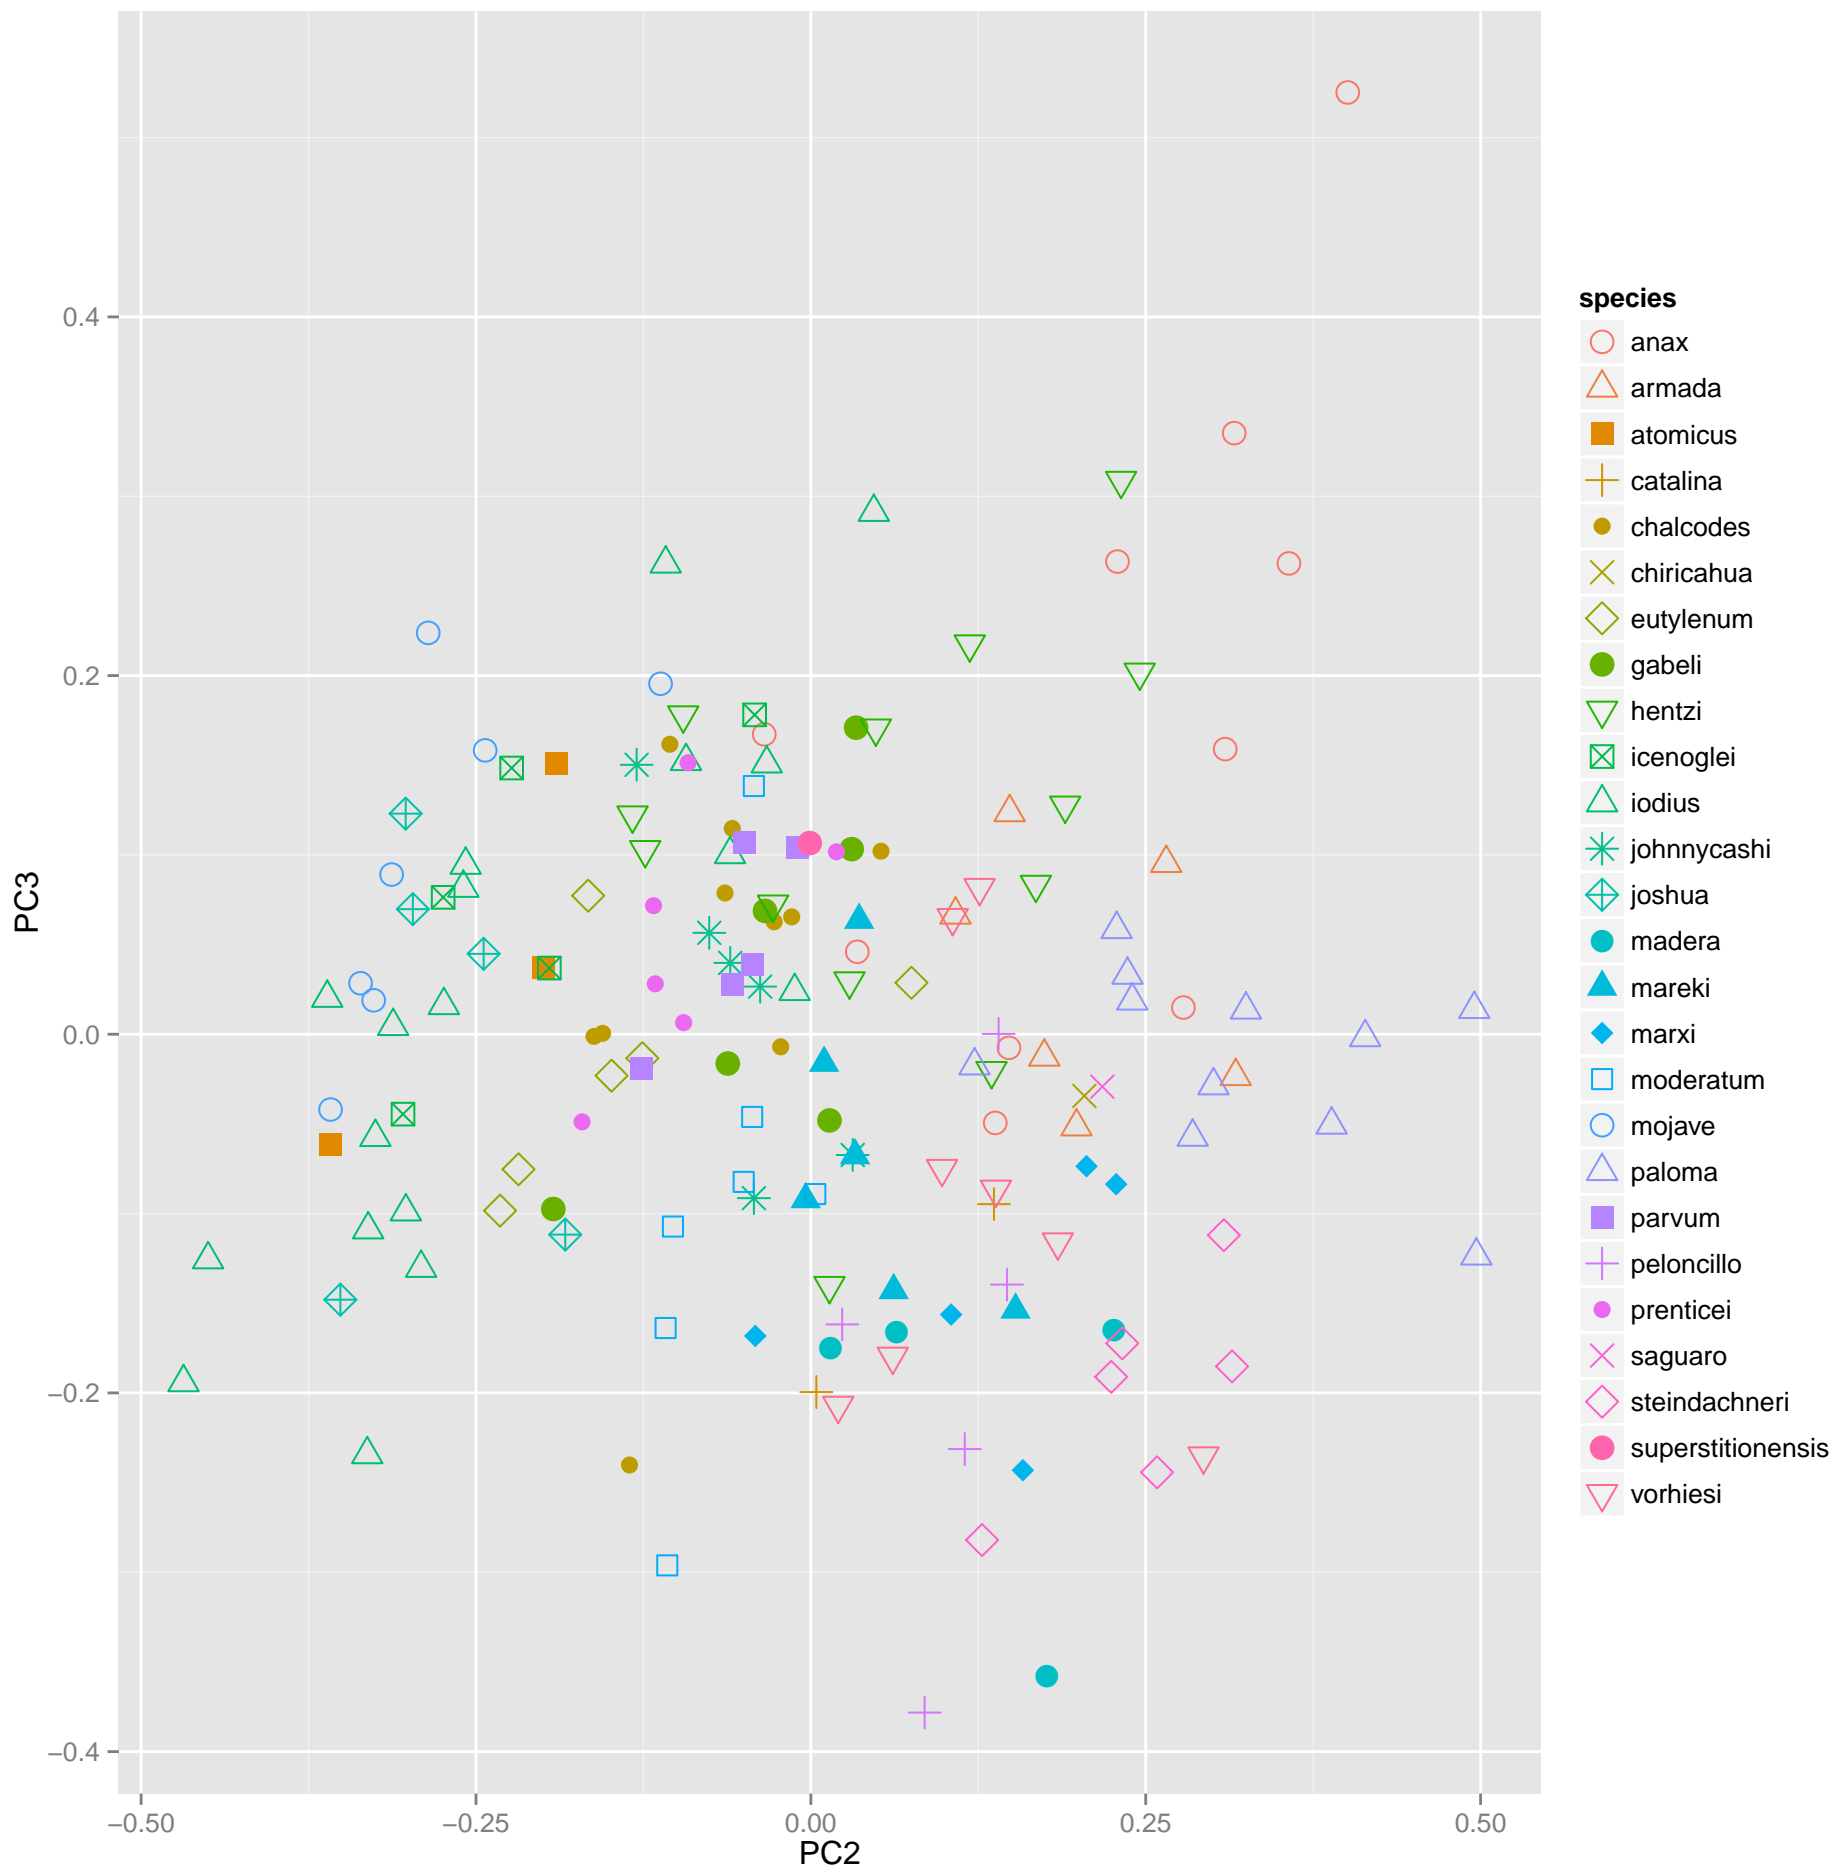

Supplement: Supplementary file 138

## Metatarsus 1/Patella 4 Length ratio – females

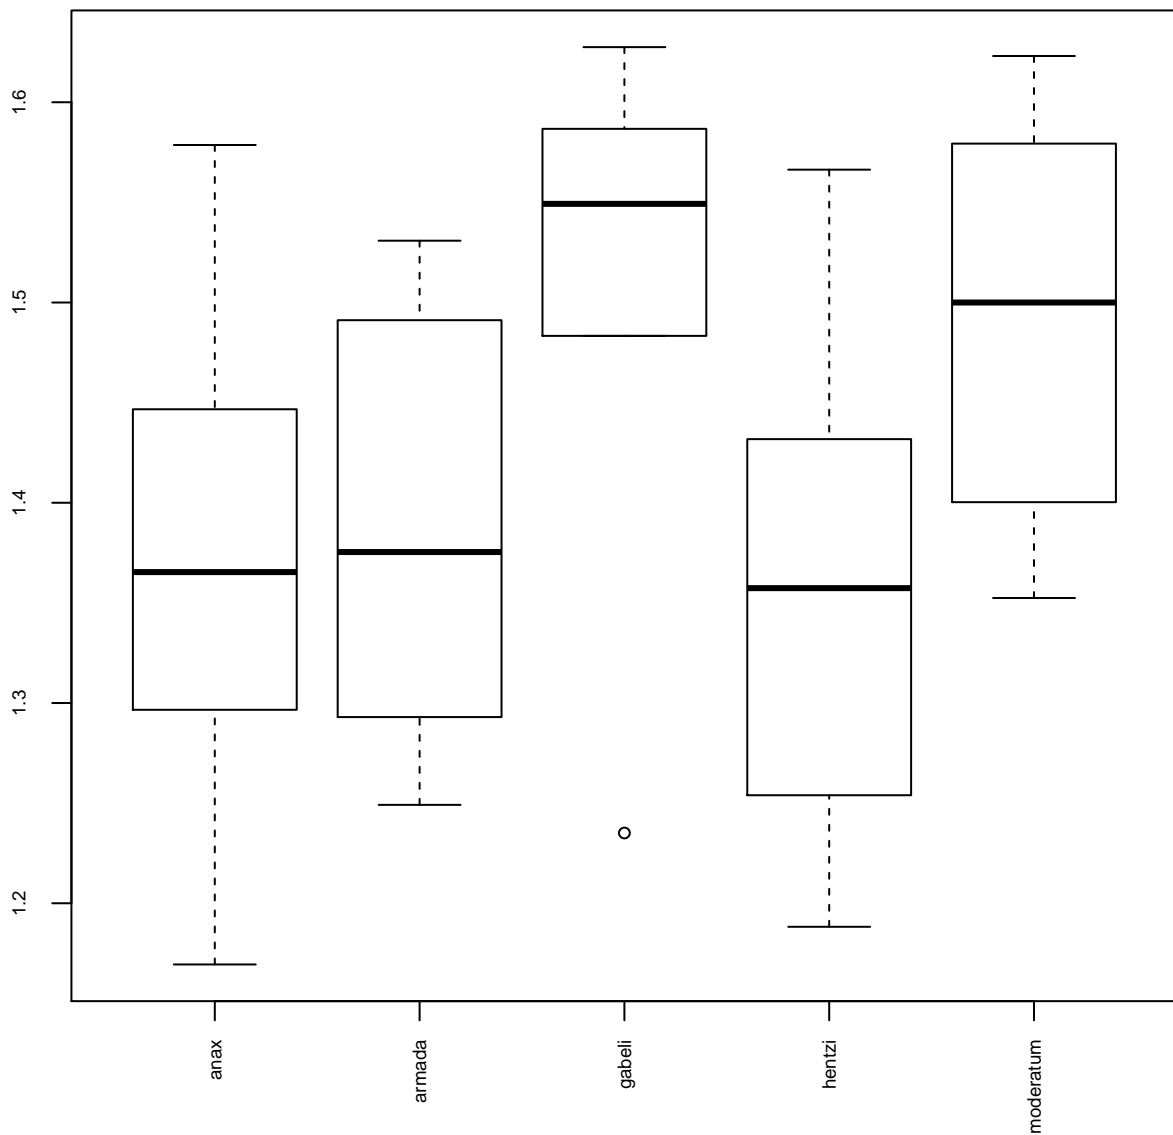

Supplement: Supplementary file 139

## Patella 1/Tarsus 1 ratio – females

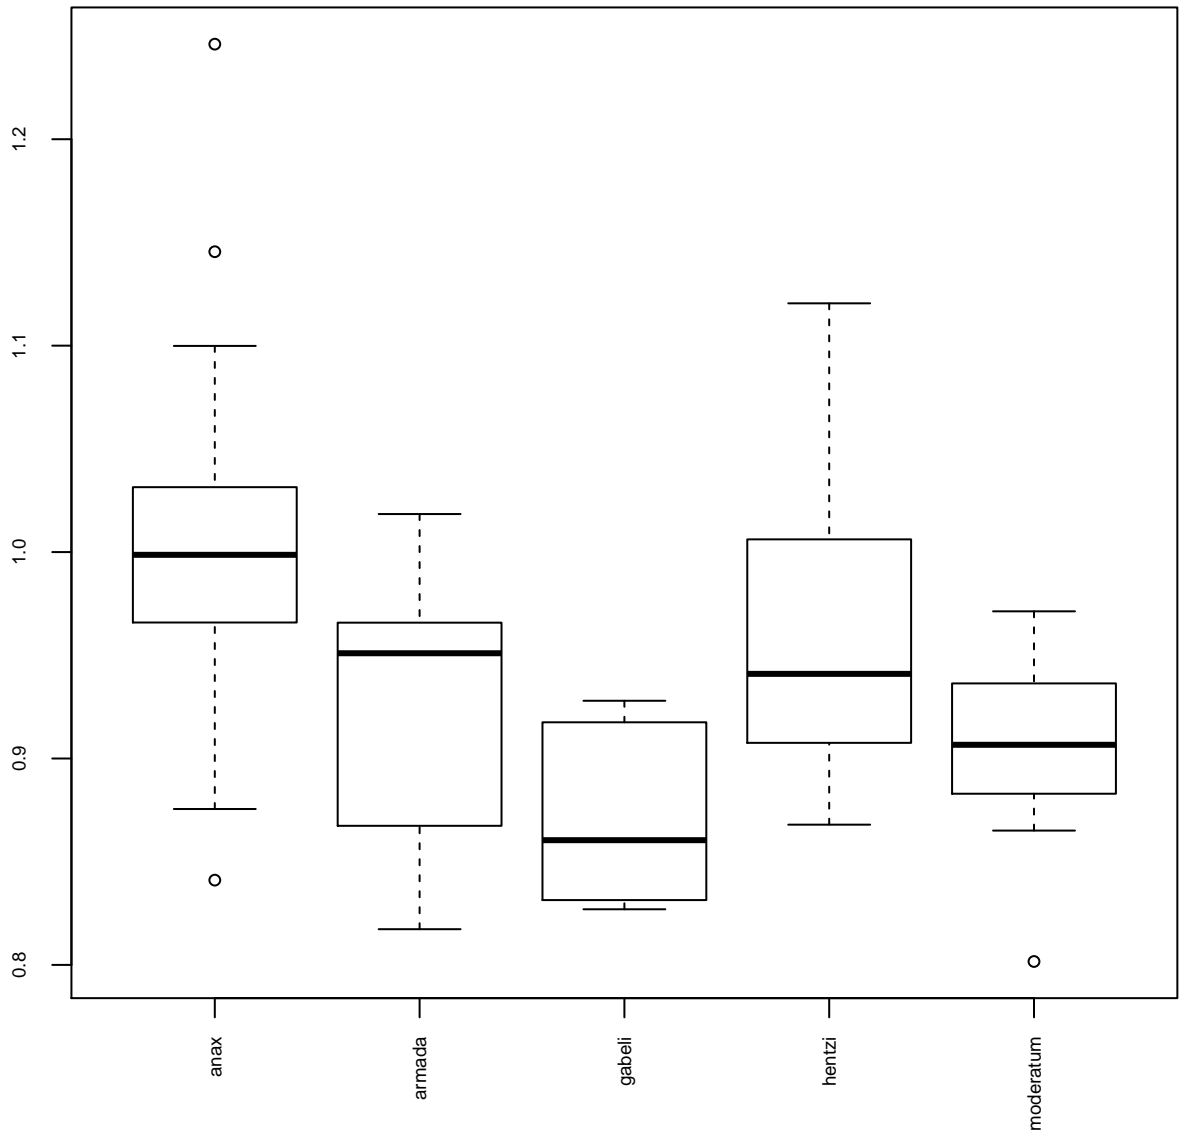

Supplement: Supplementary file 140

## Leg 4 Length/Carapace Length ratio – females

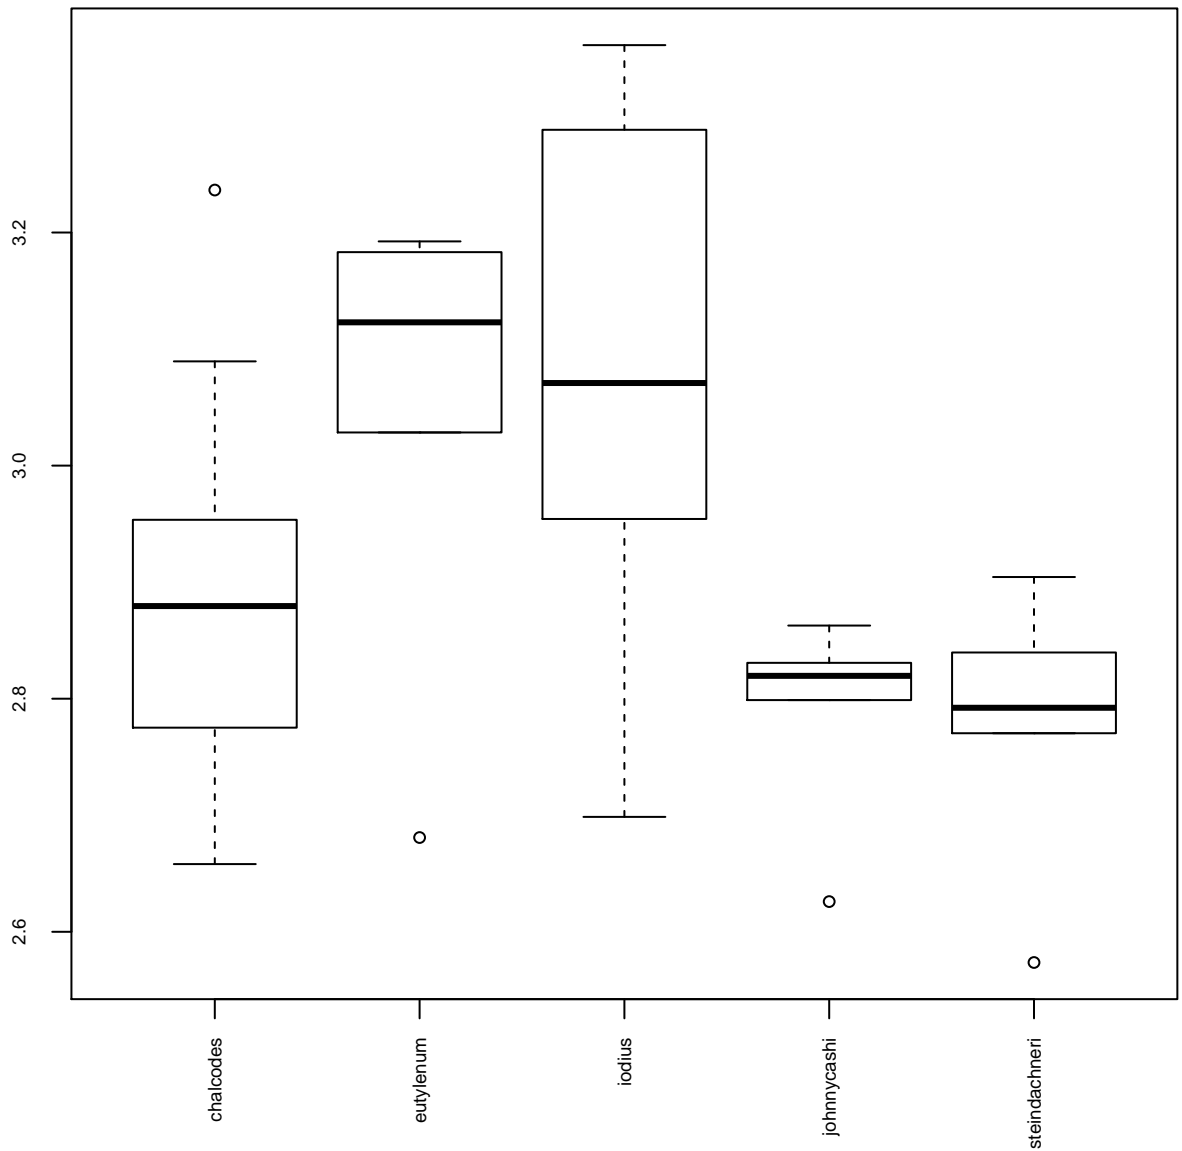

Supplement: Supplementary file 141

# Metatarsus 1/Tarsus 1 ratio – males

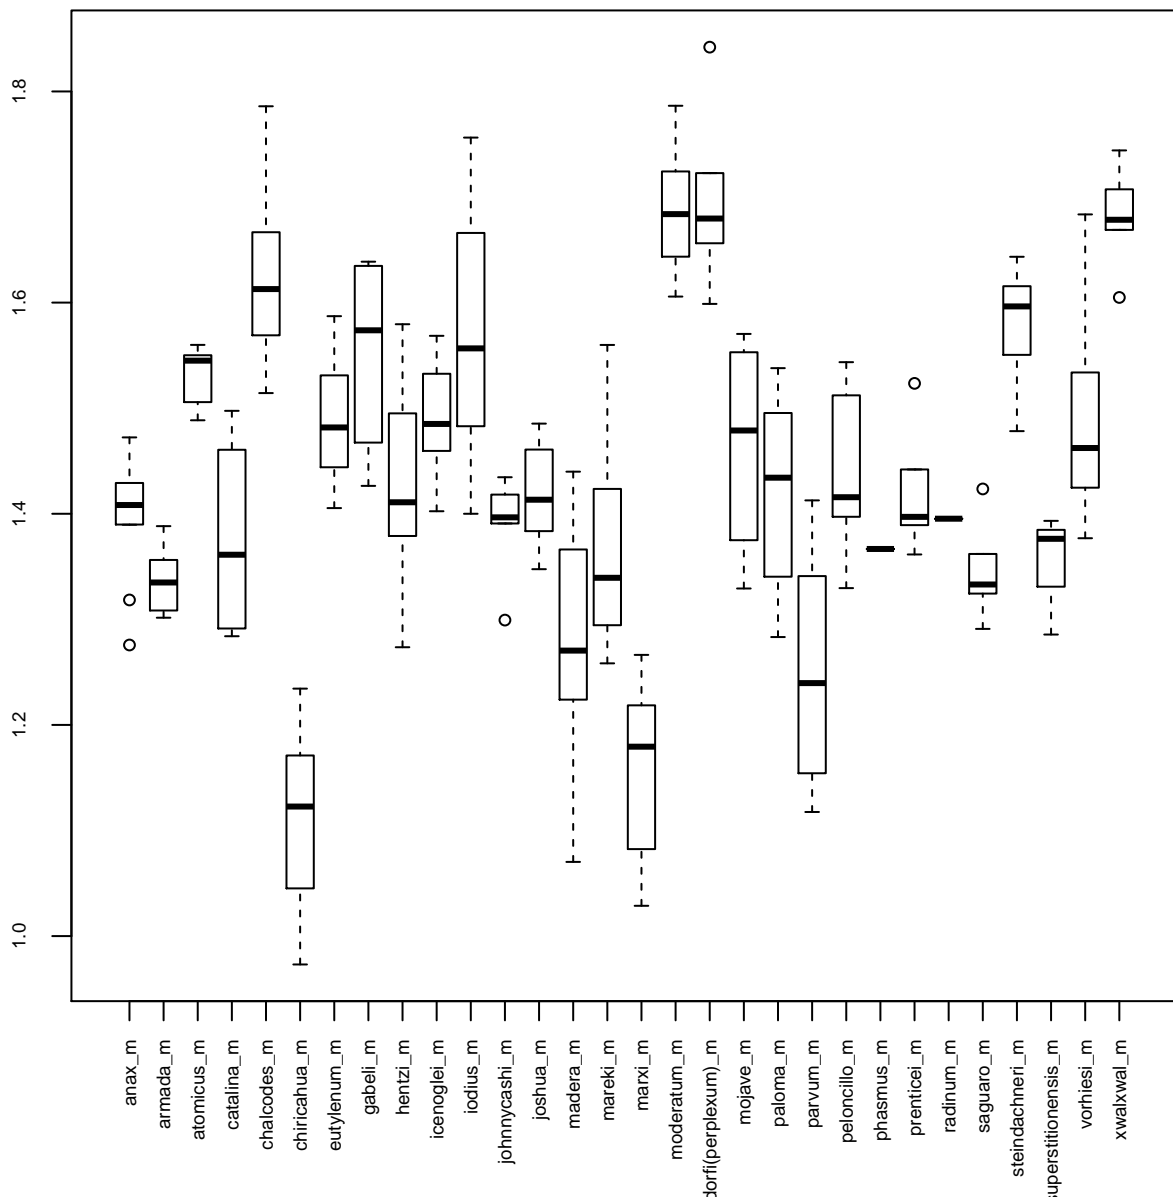

Supplement: Supplementary file 142

## Metatarsus 1/Tibia 4 Length ratio – males

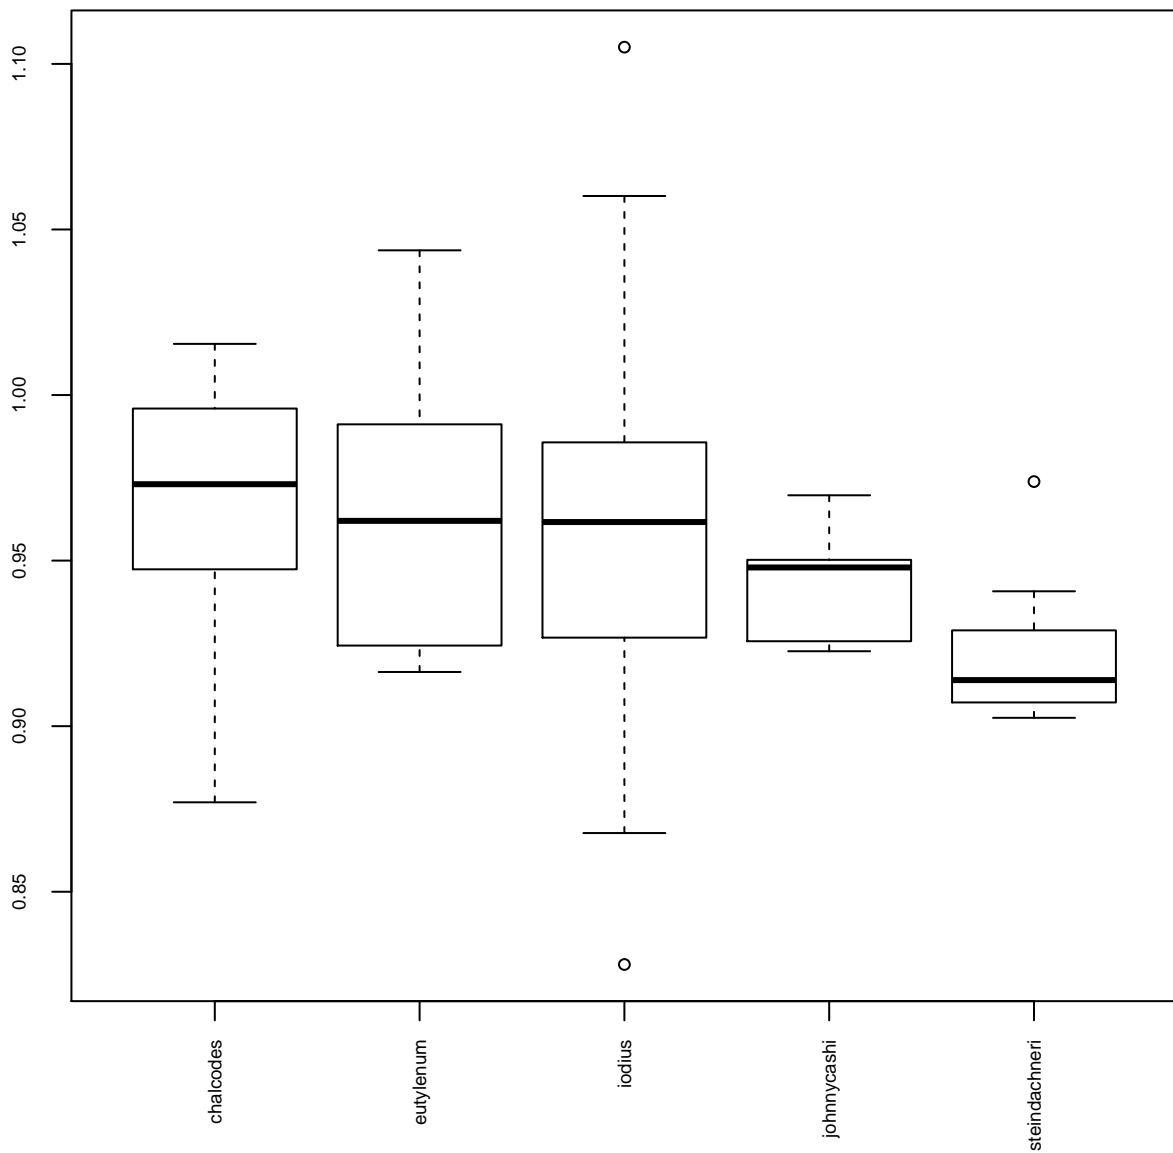

Supplement: Supplementary file 143

## Leg 3/Leg 4 Length ratio – males

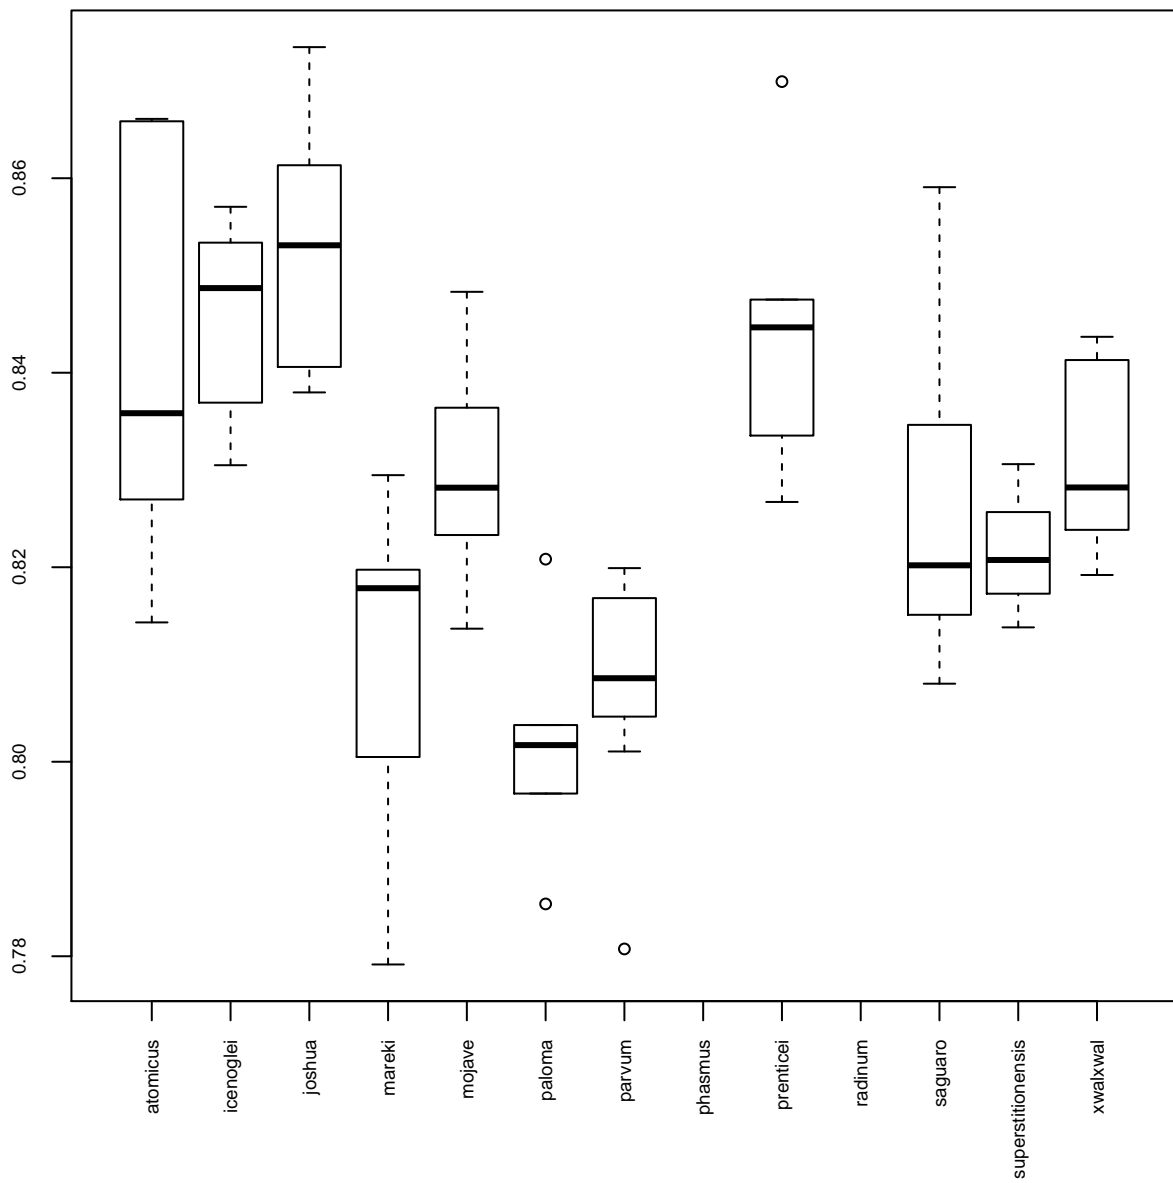

Supplement: Supplementary file 144

# Tarsus 1/Patella 4 Length ratio – females

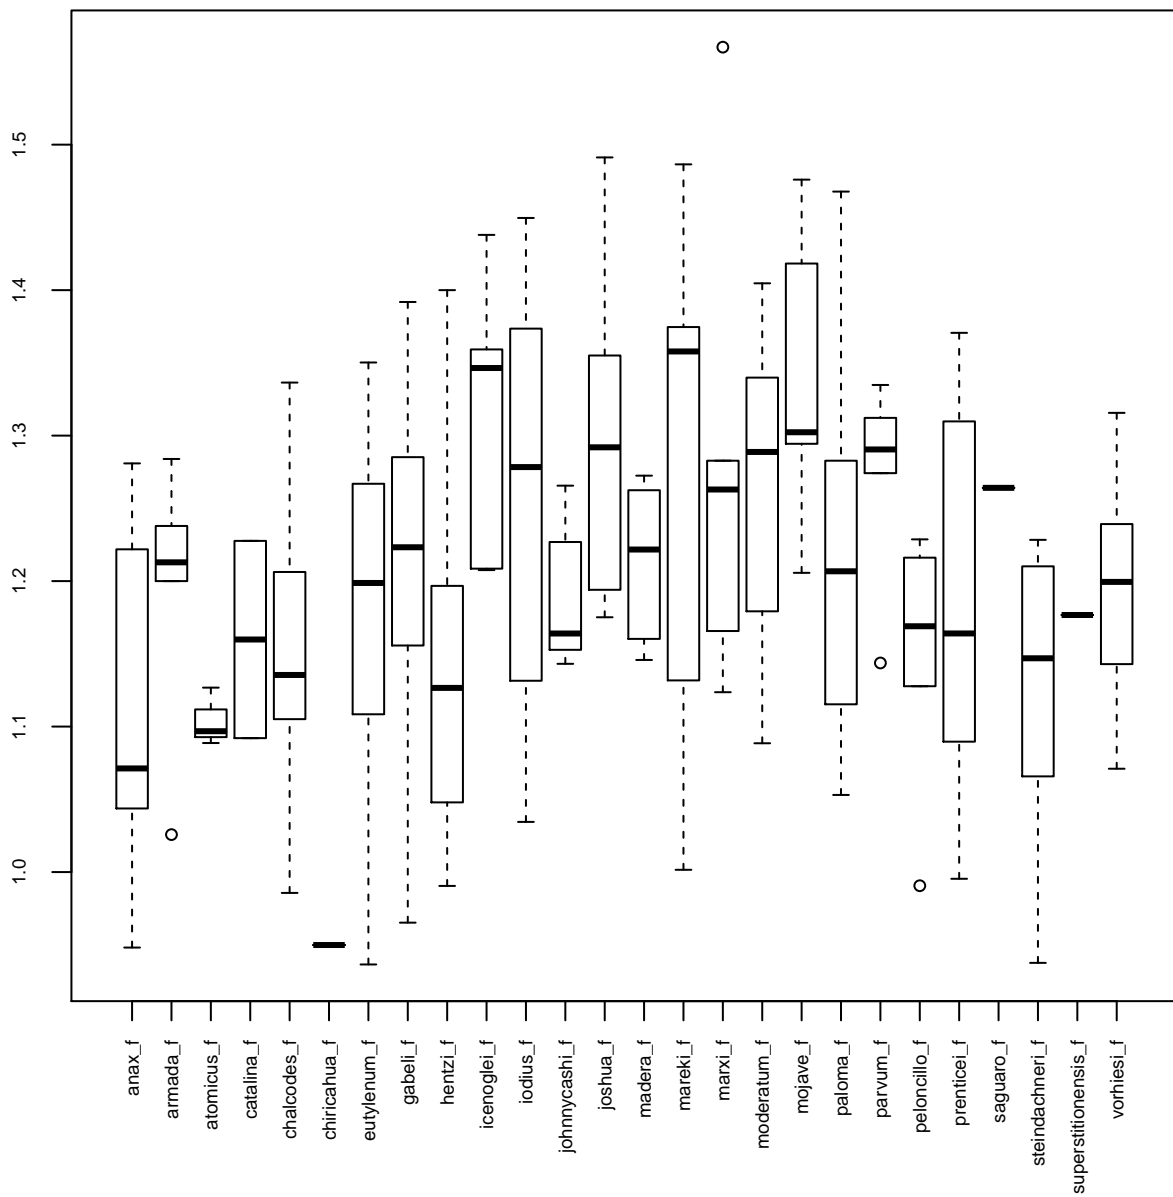

Supplement: Supplementary file 145

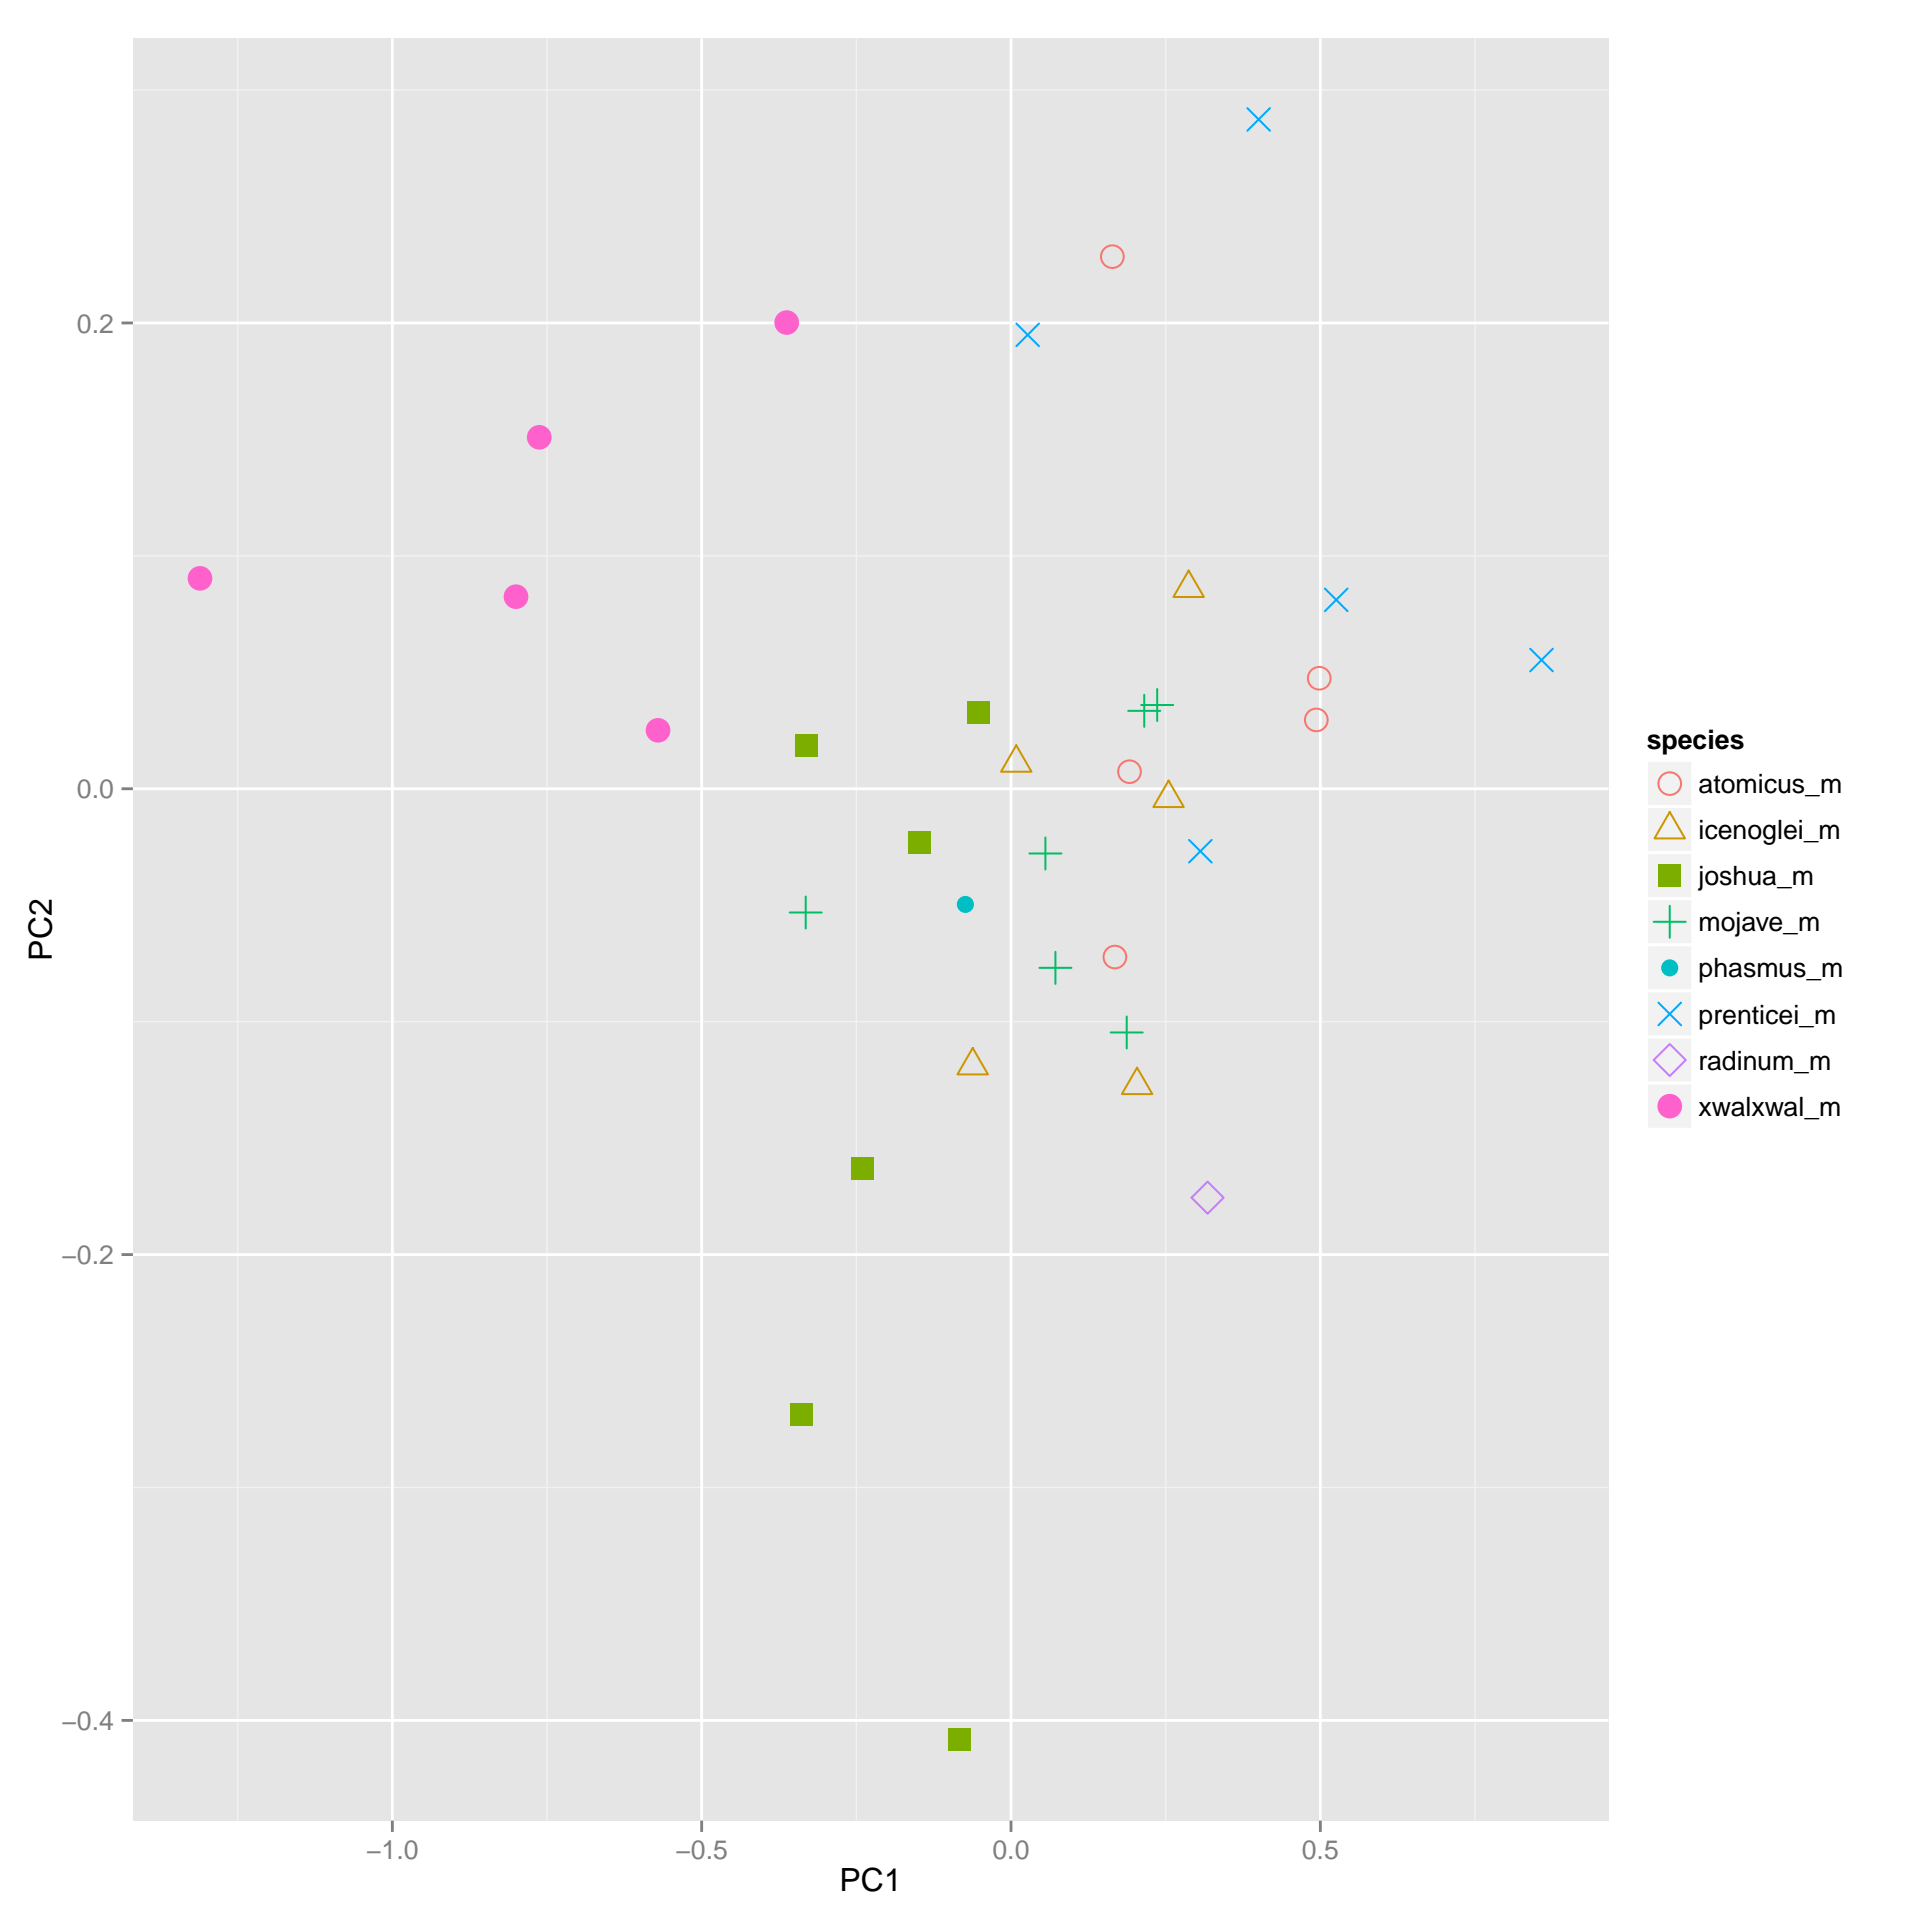

Supplement: Supplementary file 146

## Patella 1/Patella 3 ratio – females

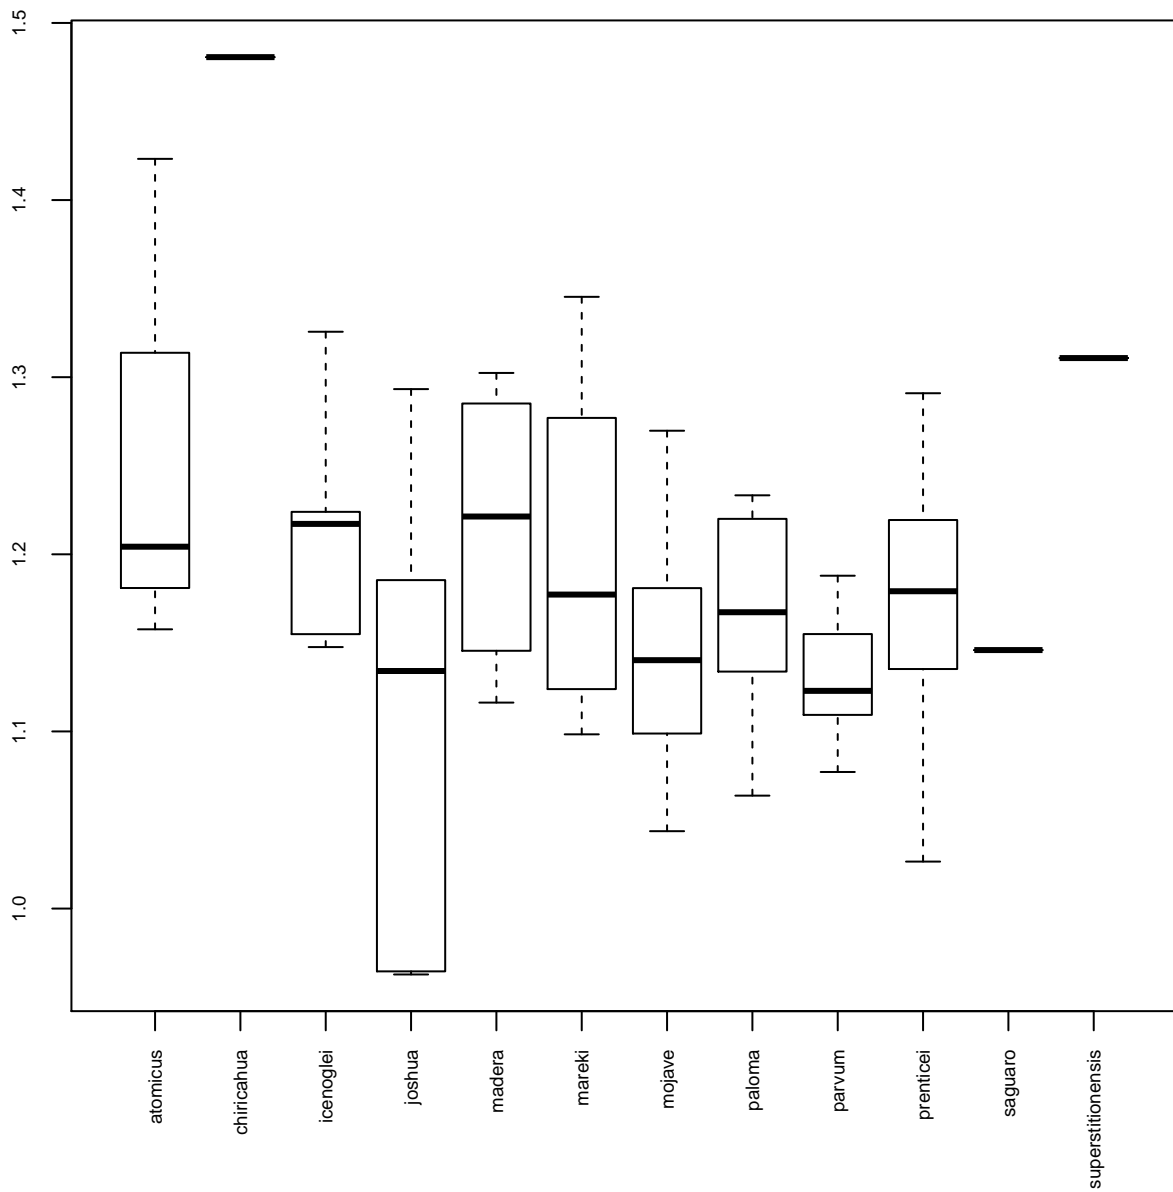

Supplement: Supplementary file 147

## Metatarsus 3/Tibia 4 Length ratio – males

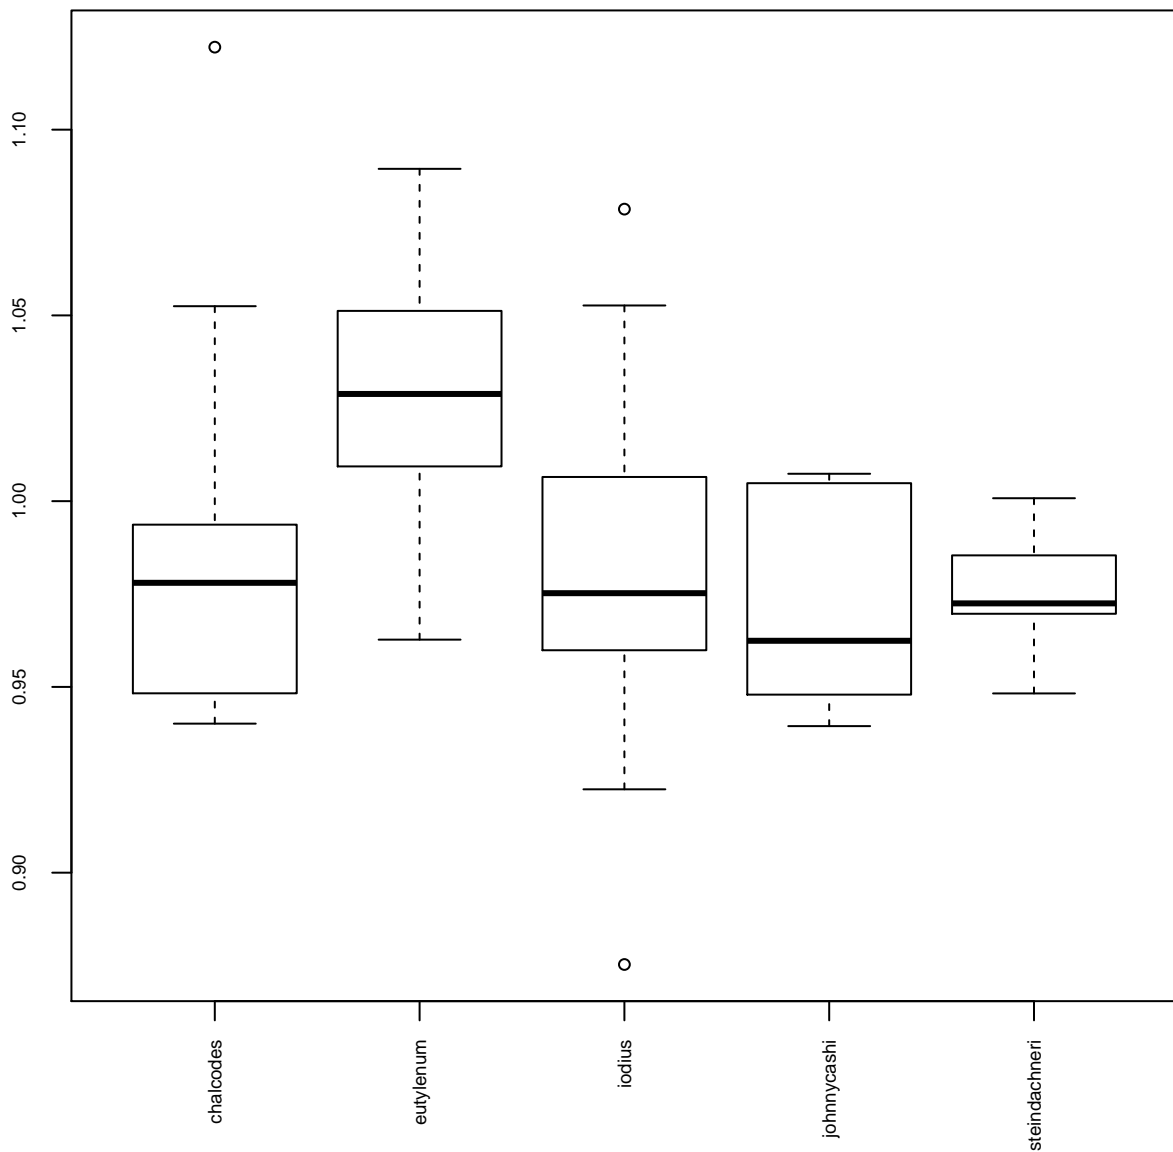

Supplement: Supplementary file 148

## Femur 1/Metatarsus 1 ratio – males

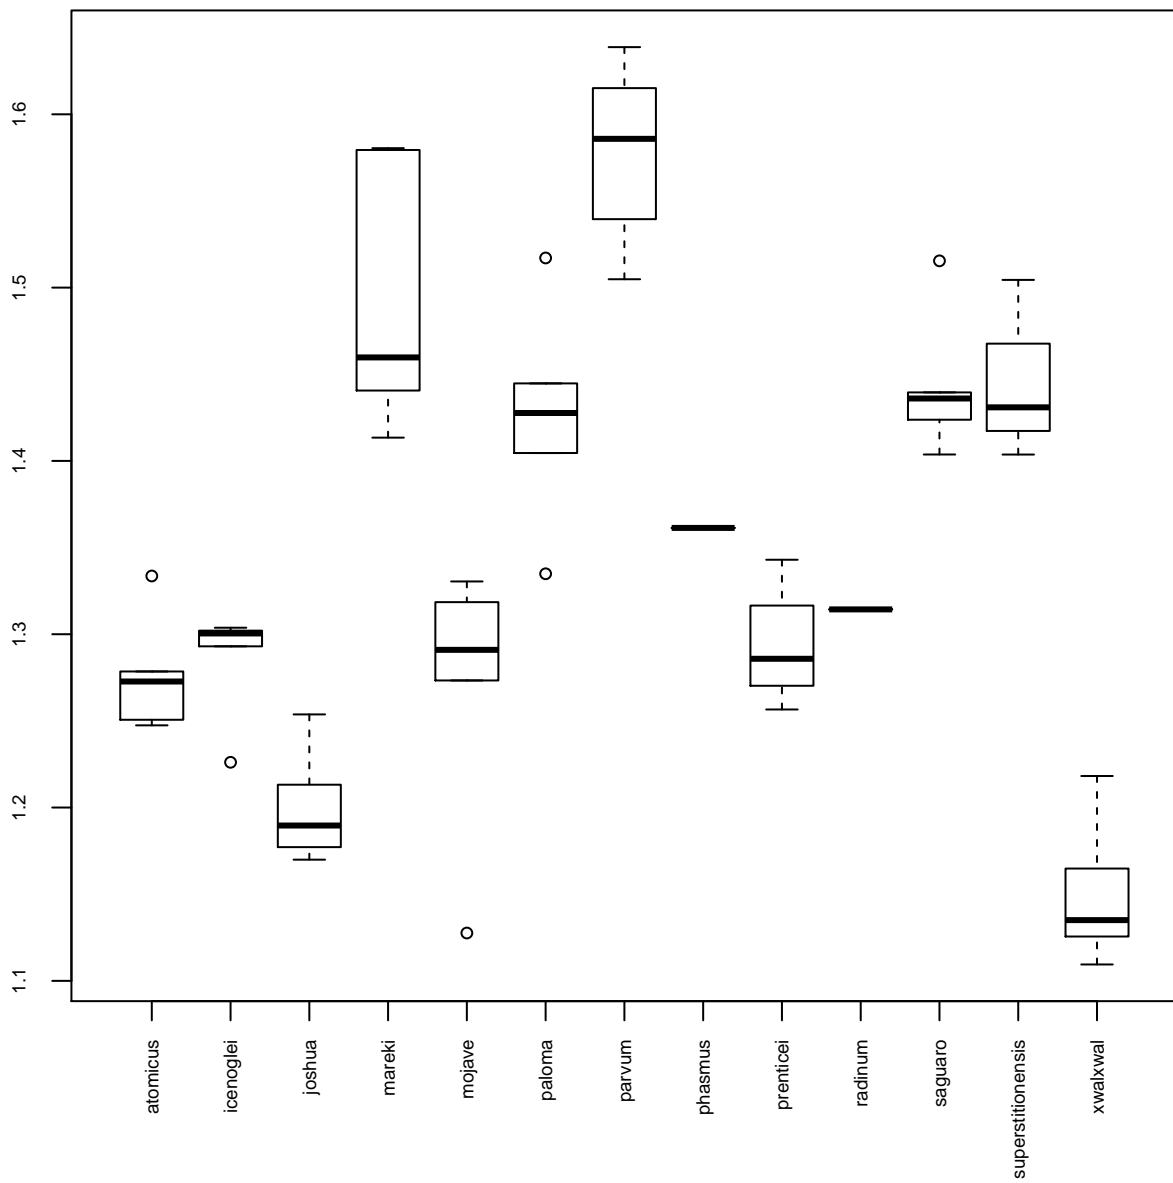

Supplement: Supplementary file 149

## Patella 3/Patella 4 ratio – males

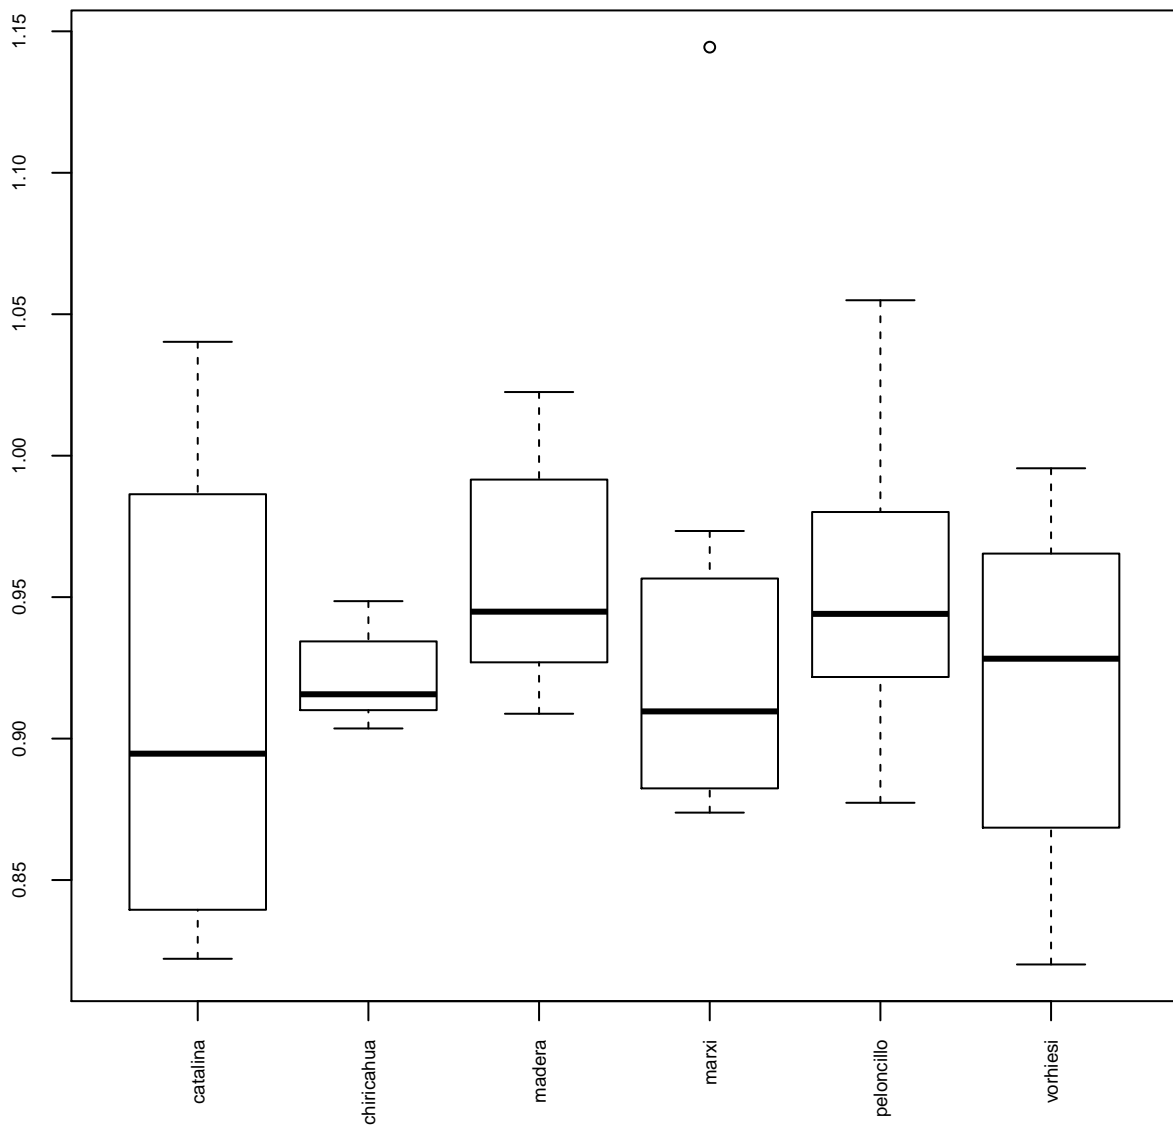

Supplement: Supplementary file 150

## Metatarsus 3/Metatarsus 4 ratio – males

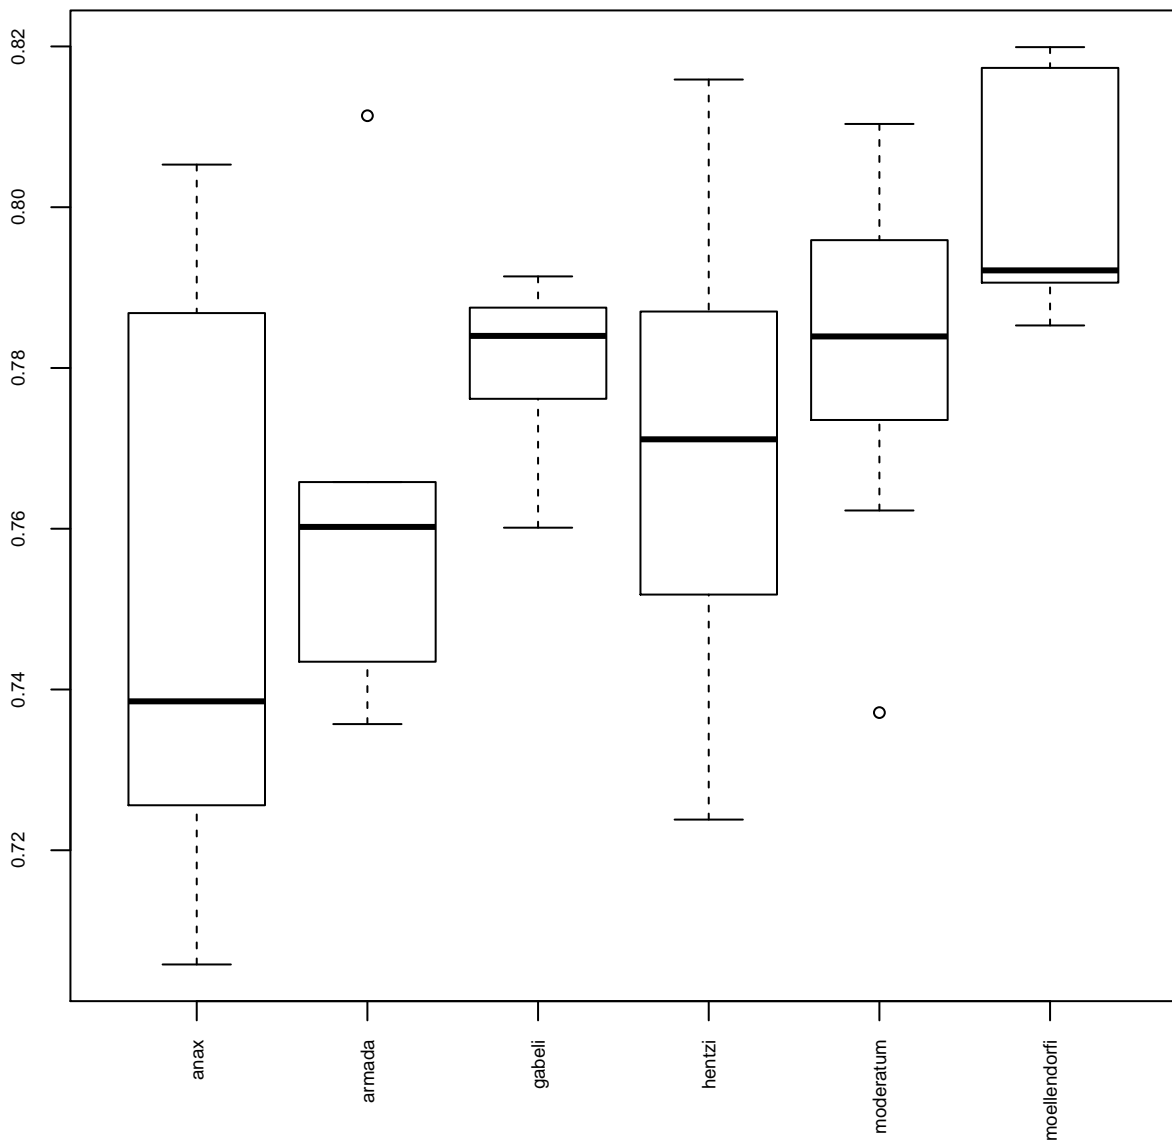

Supplement: Supplementary file 151

## Carapace Length/Palpal Tibia Width ratio – males

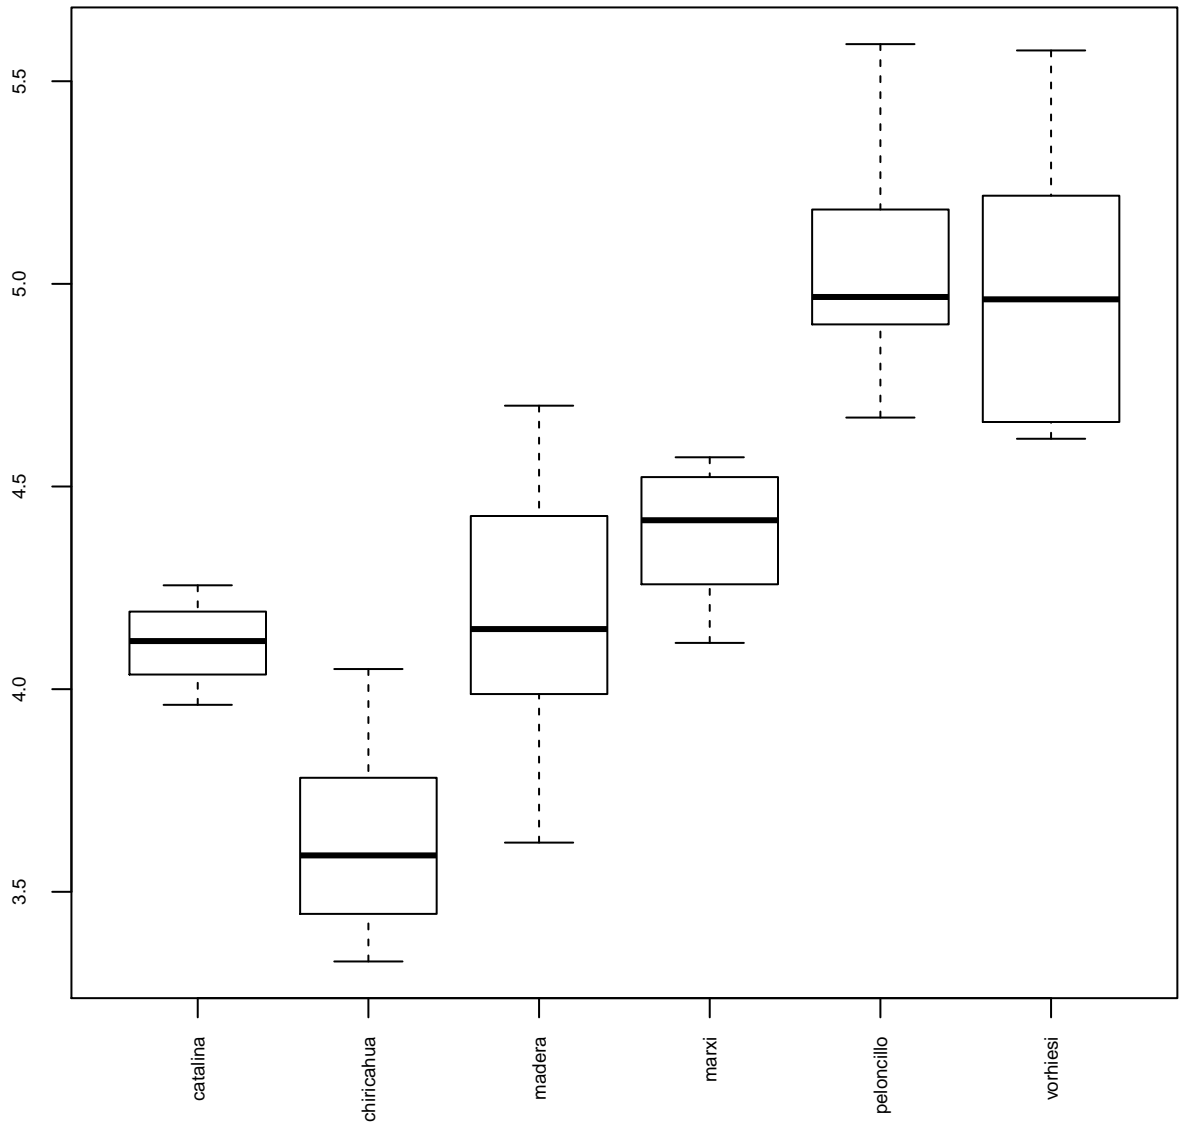

Supplement: Supplementary file 152

## Tarsus 1/Tibia 3 Length ratio – females

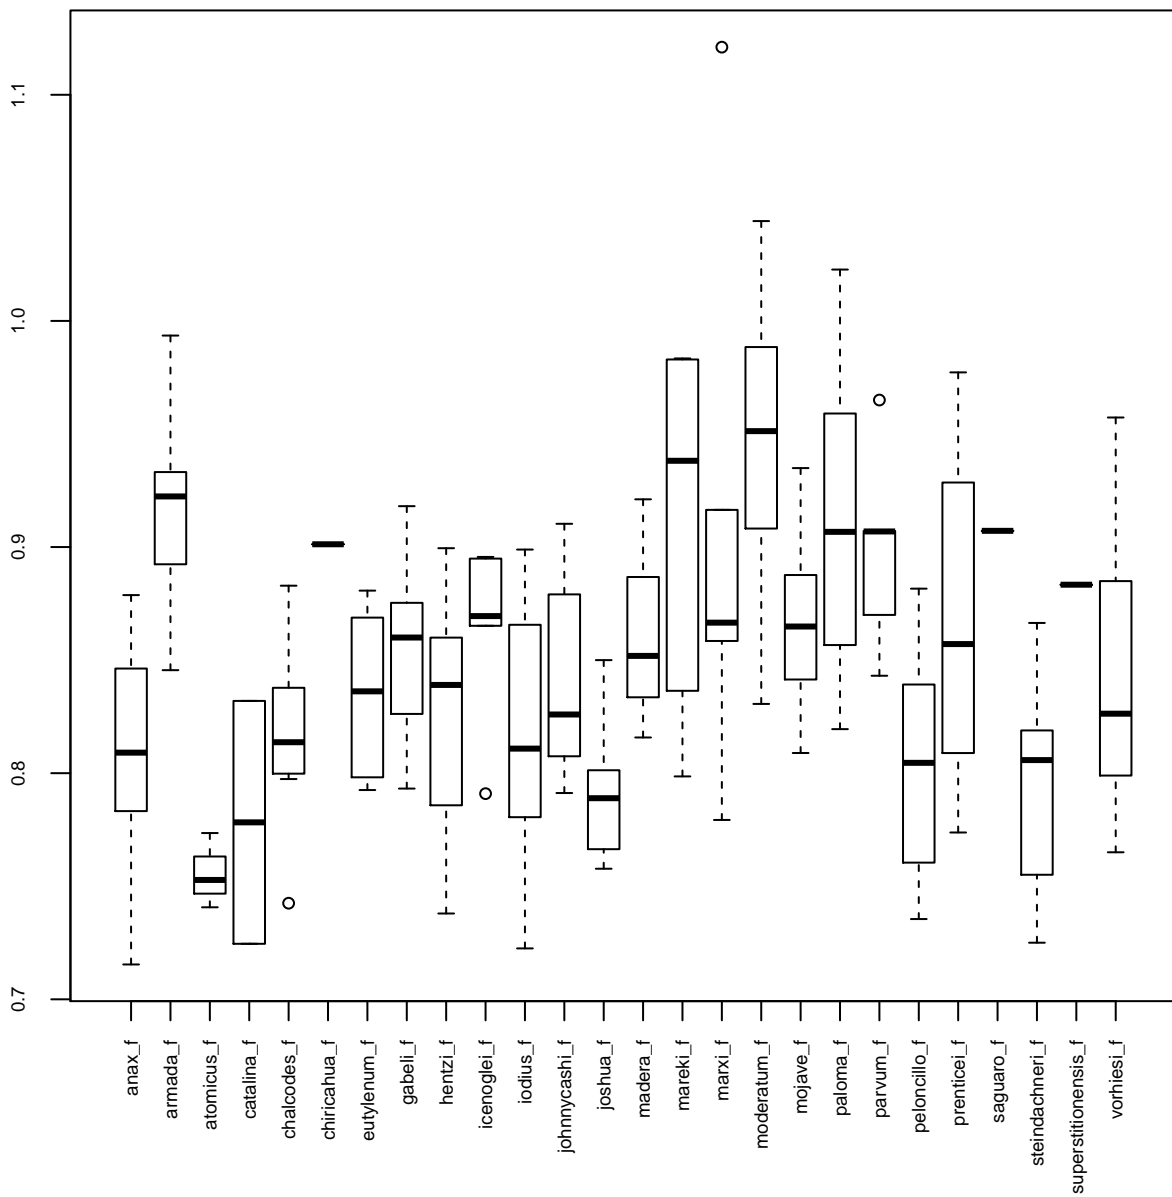

Supplement: Supplementary file 153

## Femur 3/Tibia 4 Length ratio – males

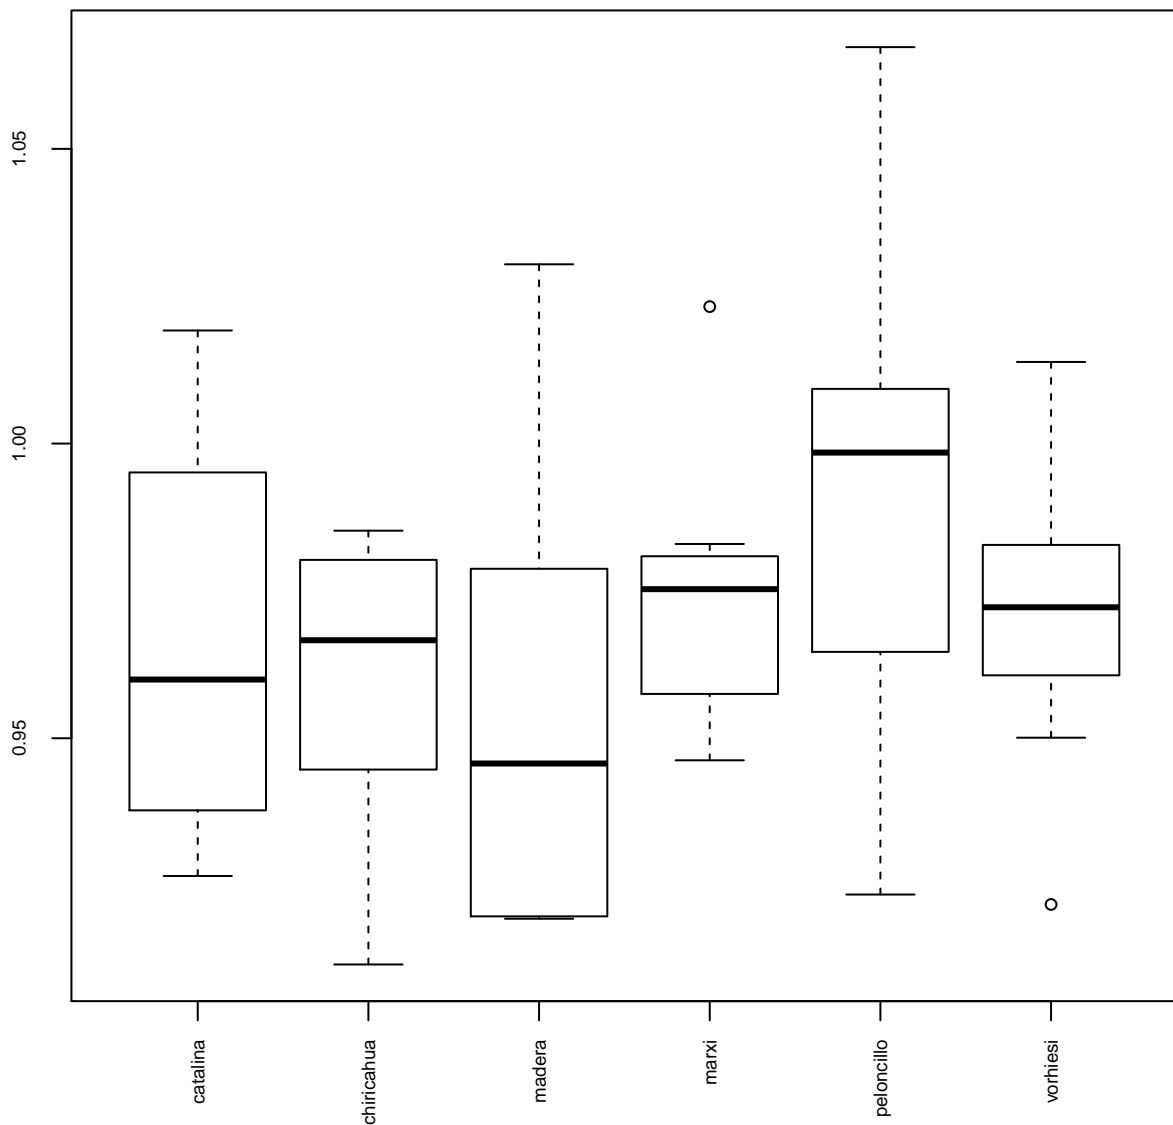

Supplement: Supplementary file 154

# Patella 4/Metatarsus 4 ratio – males

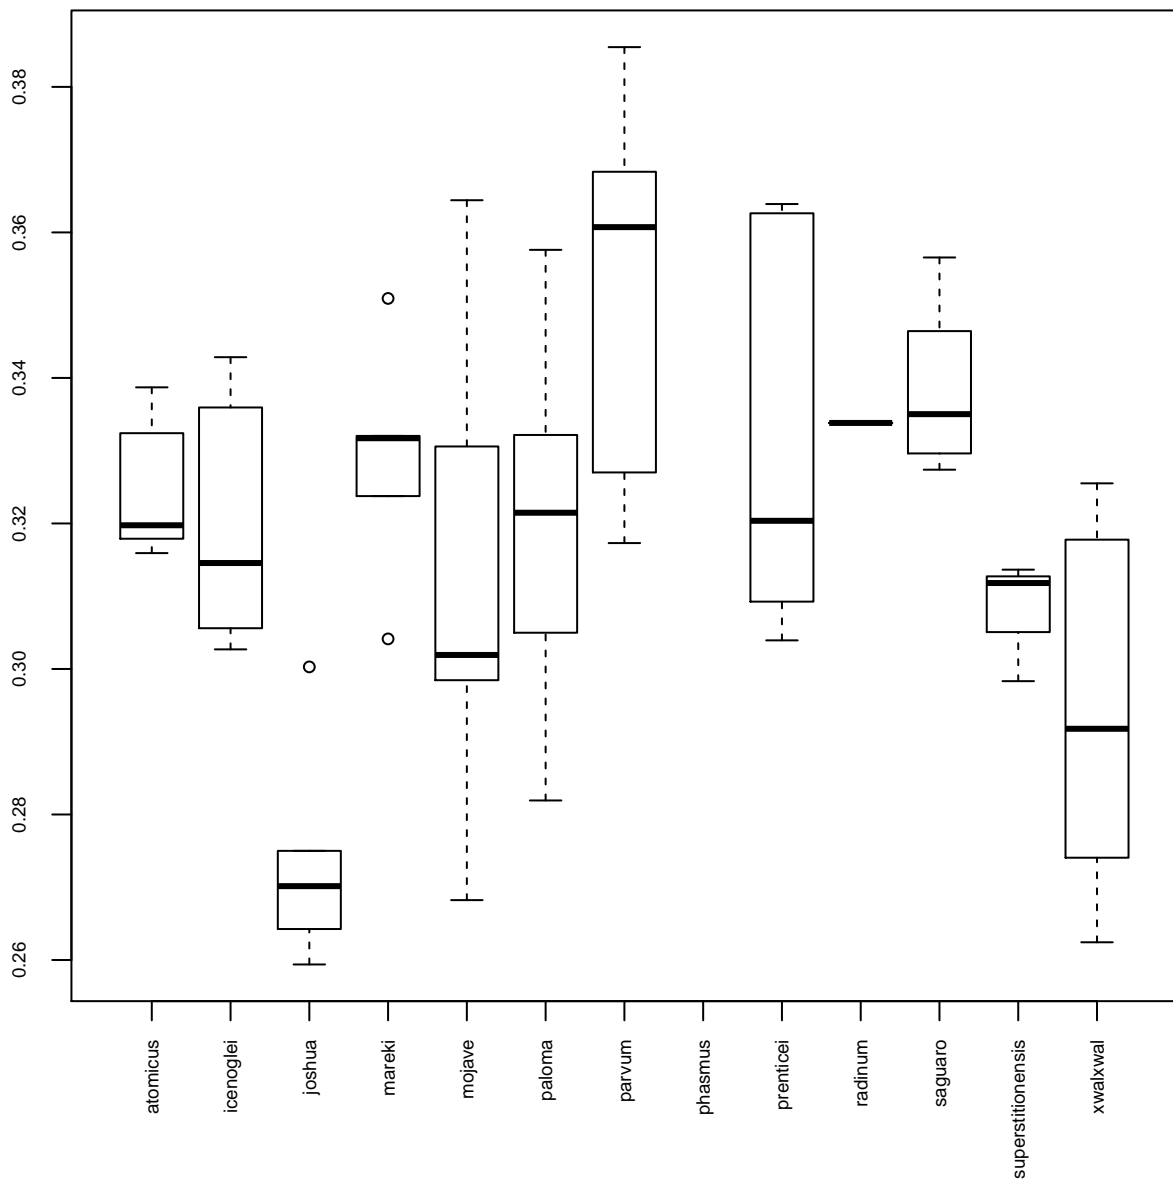

Supplement: Supplementary file 155

## Leg 1 Length/Carapace Length ratio – females

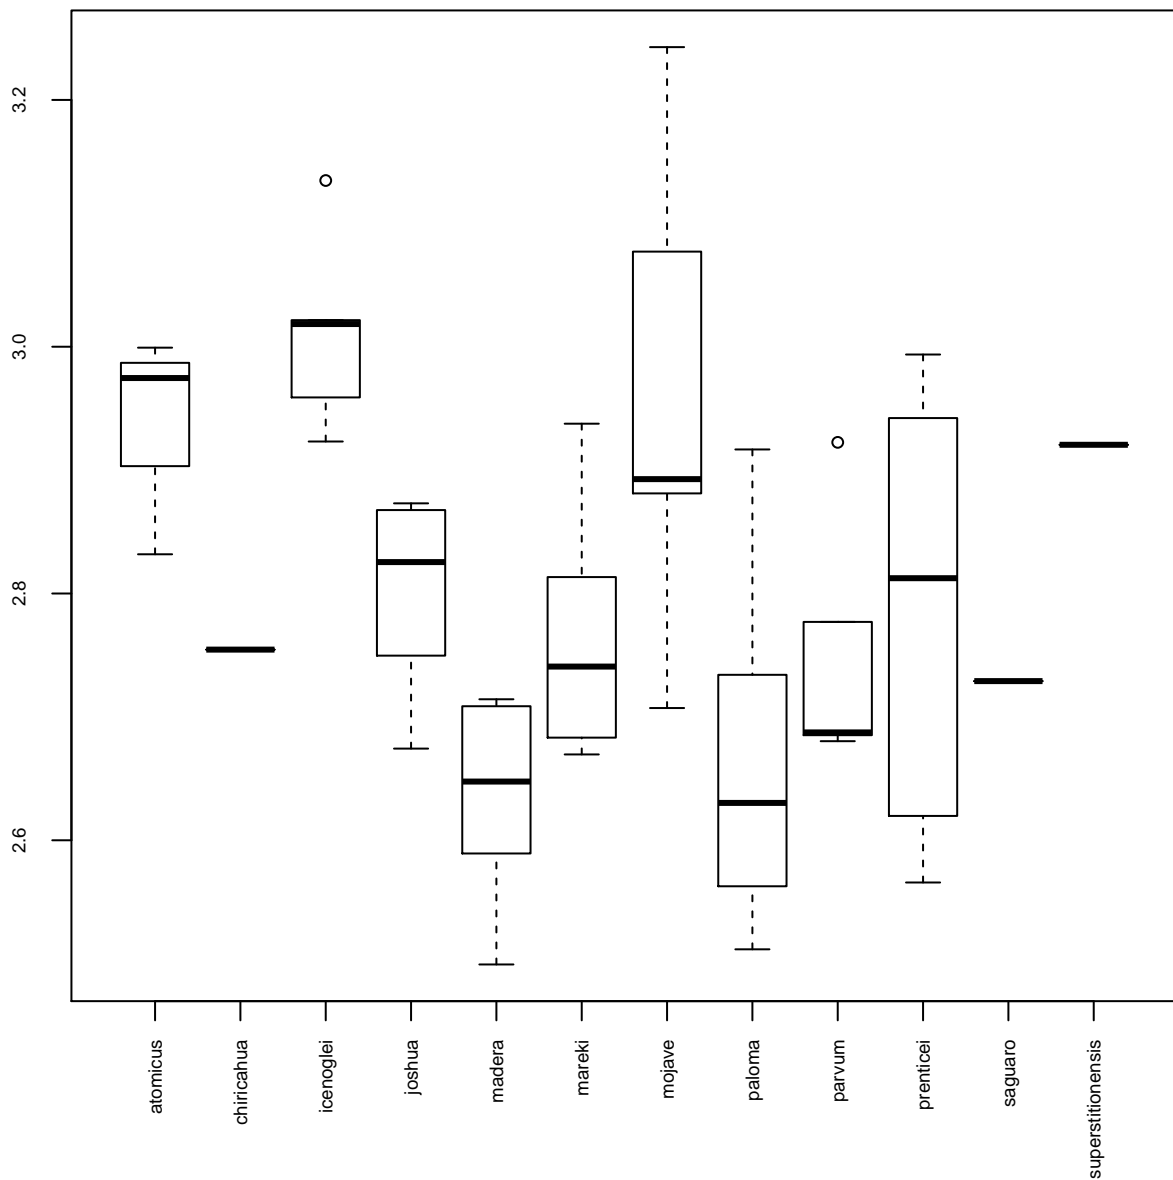

Supplement: Supplementary file 156

## Tibia 3/Metatarsus 4 Length ratio – males

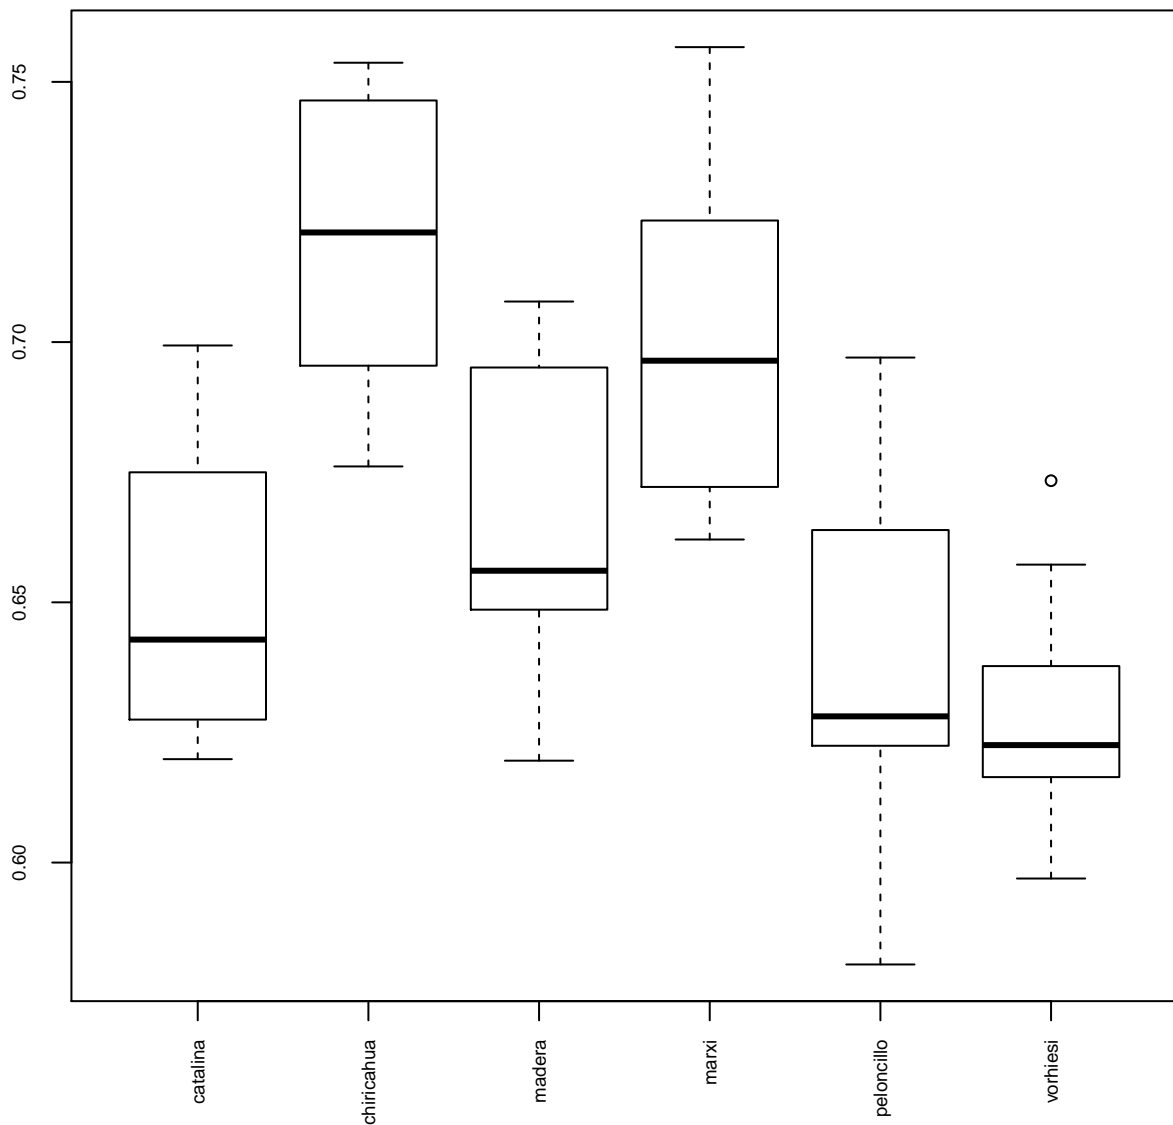

Supplement: Supplementary file 157

## Femur 3/Patella 4 Length ratio – males

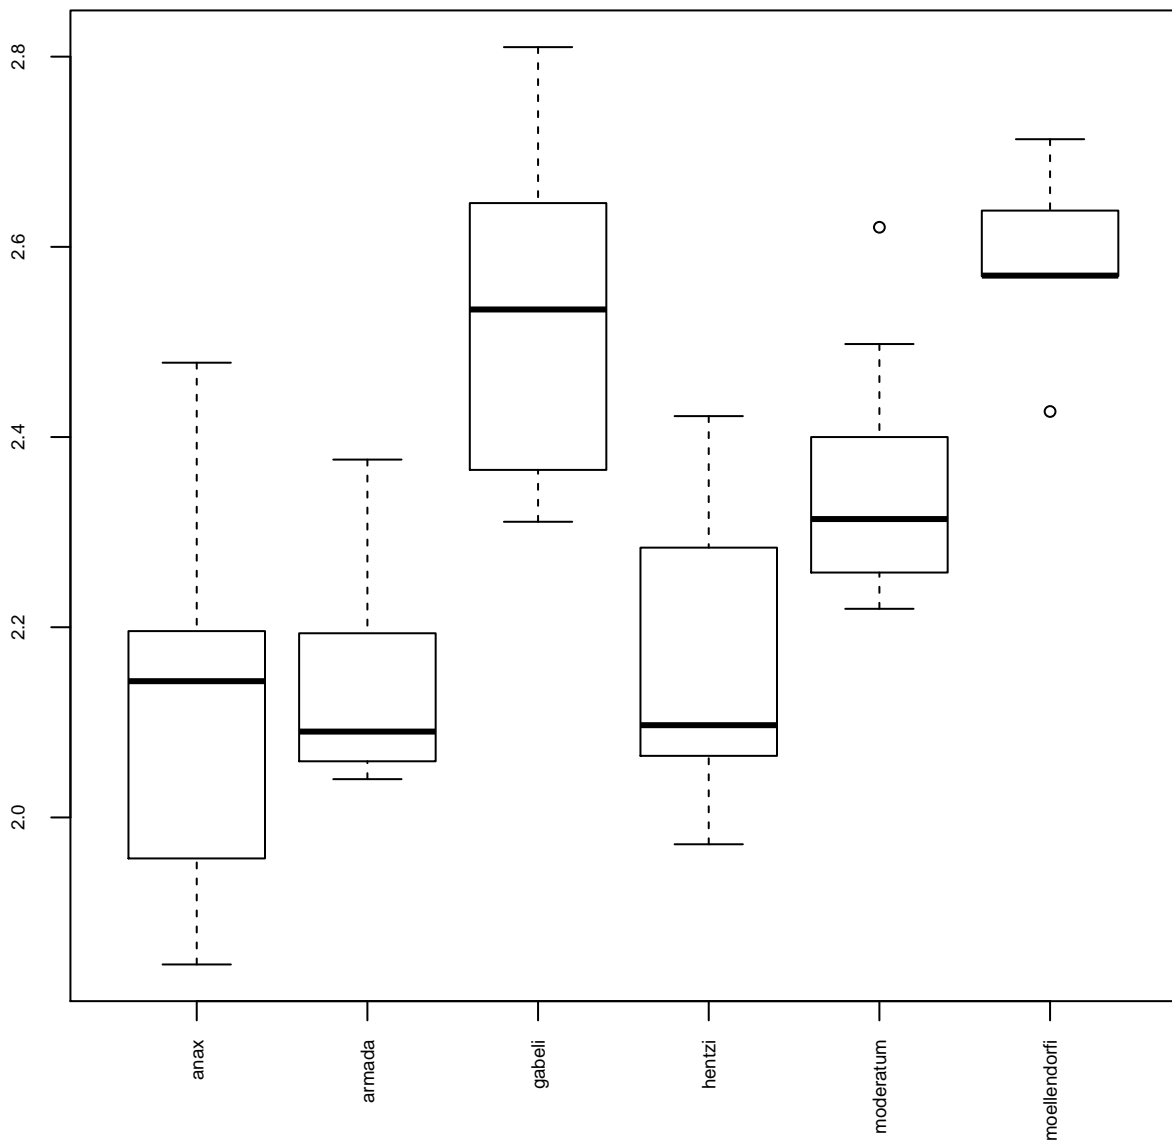

Supplement: Supplementary file 158

## Tarsus 1/Tarsus 4 ratio – males

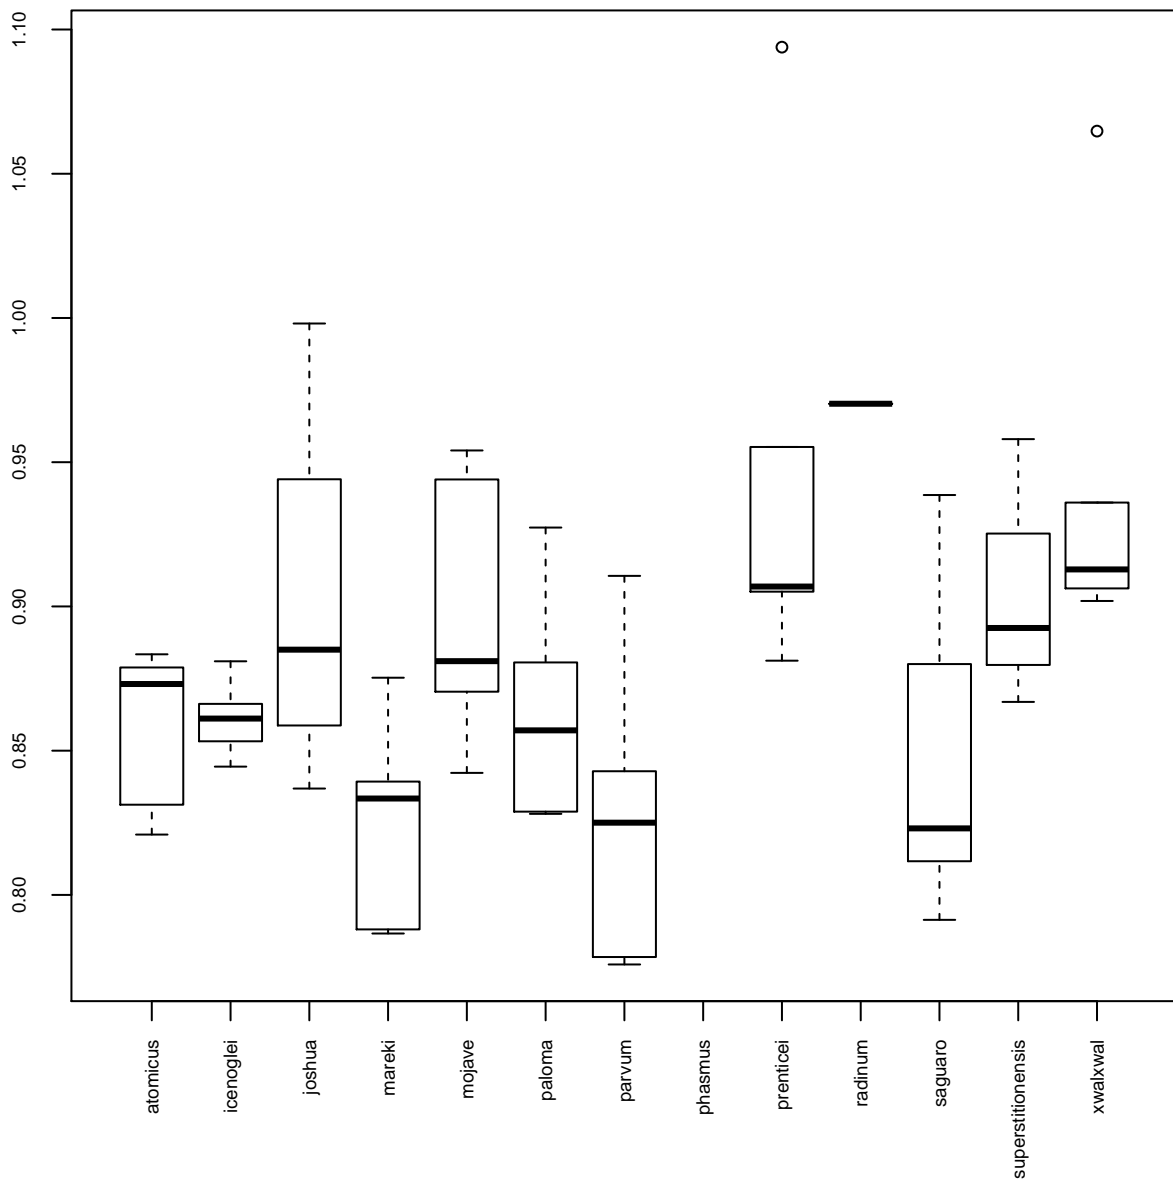

Supplement: Supplementary file 159

## Carapace Length/Femur 1 ratio – males

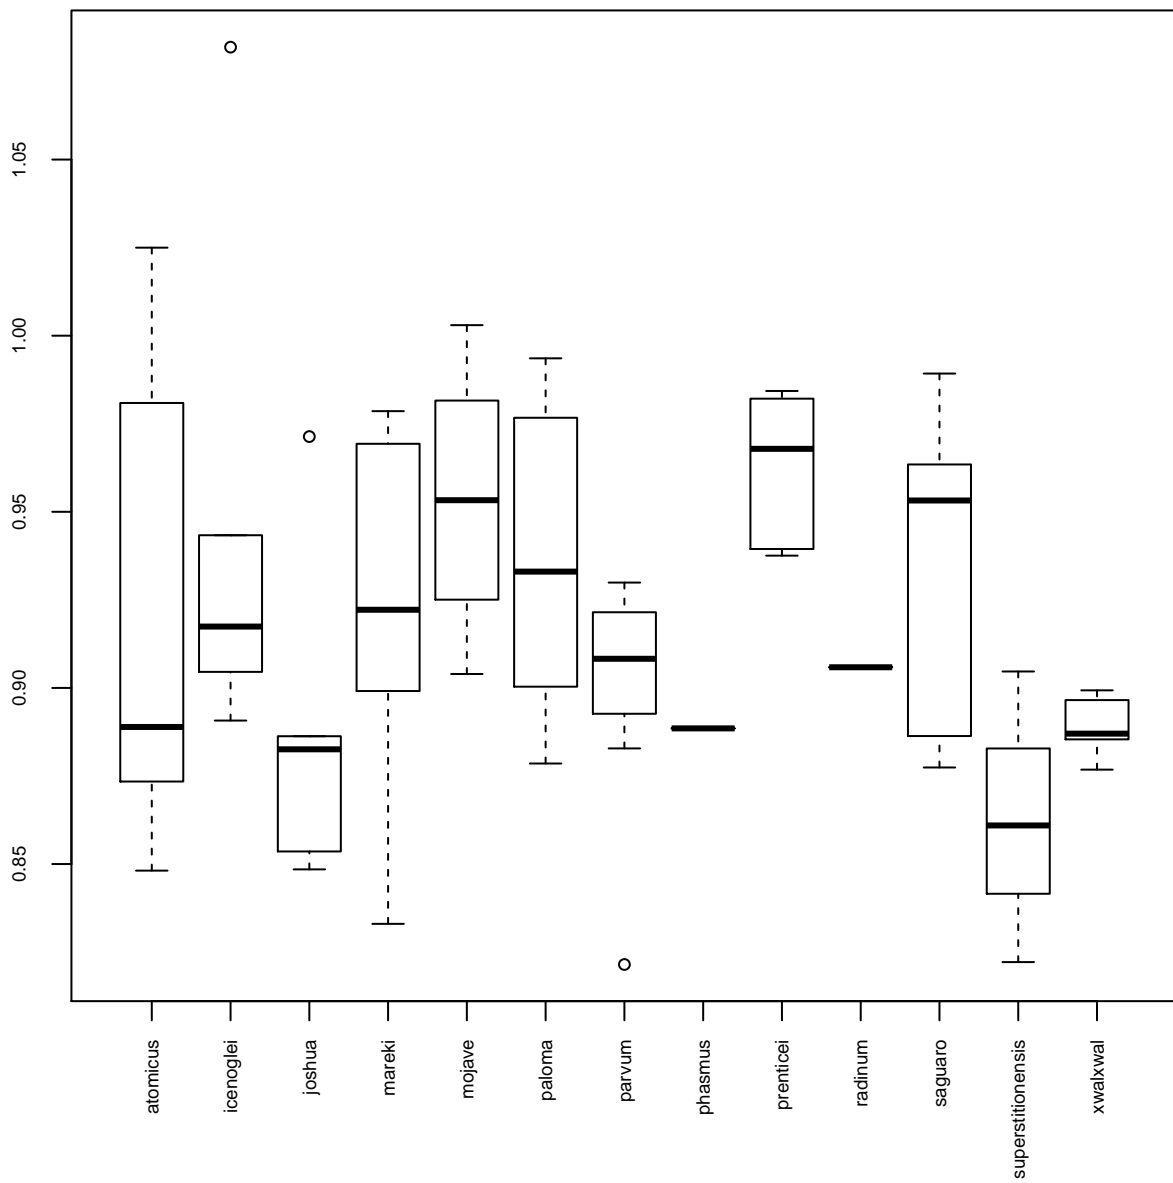

Supplement: Supplementary file 160

## Palpal Tibia/Femur 3 Length ratio – males

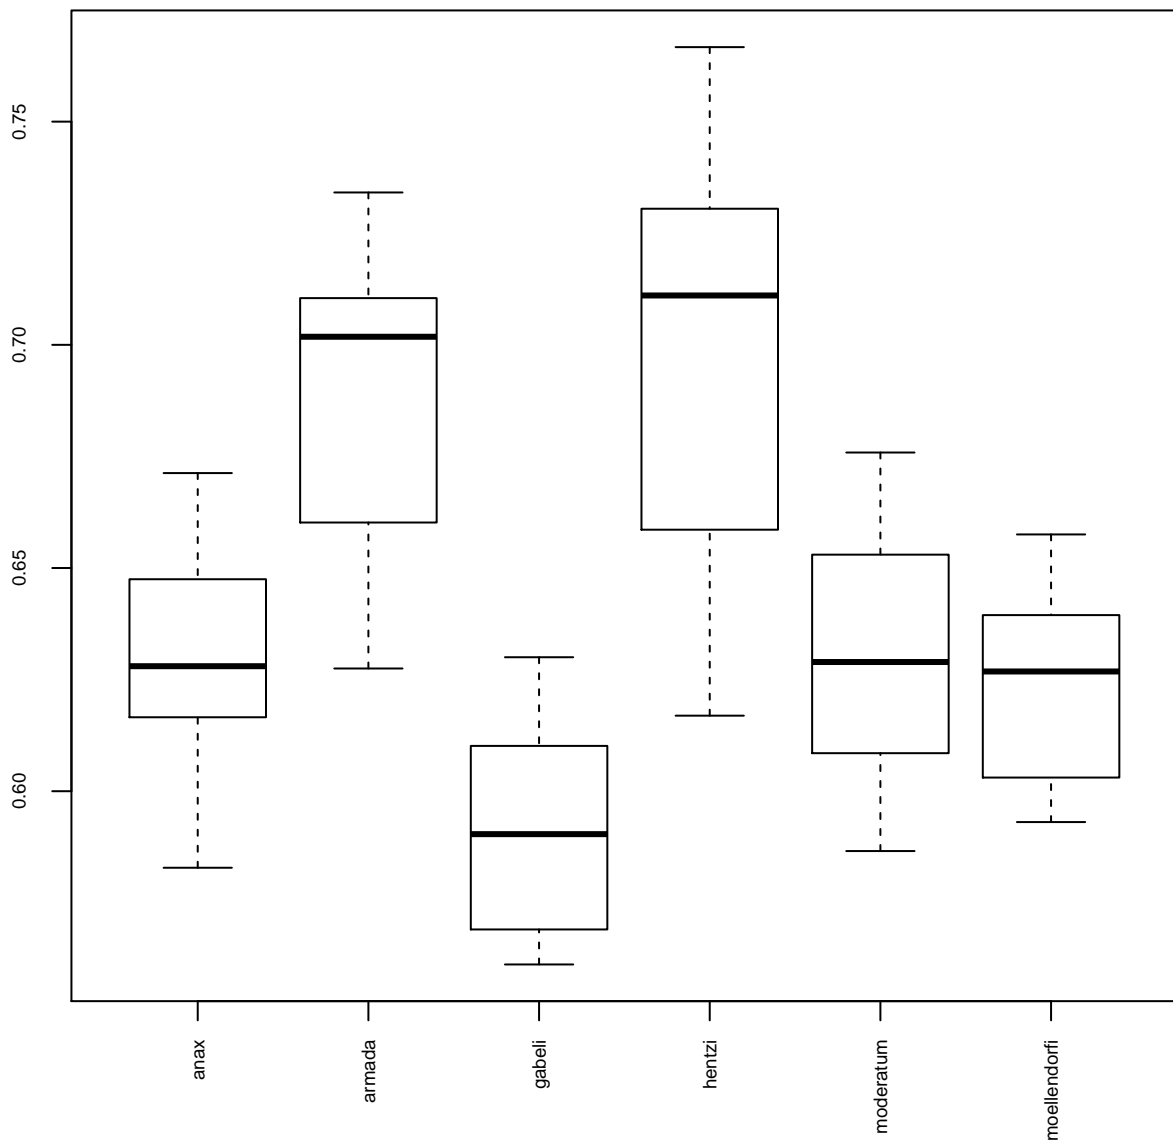

Supplement: Supplementary file 161

## Femur 1/Tibia 4 ratio – males

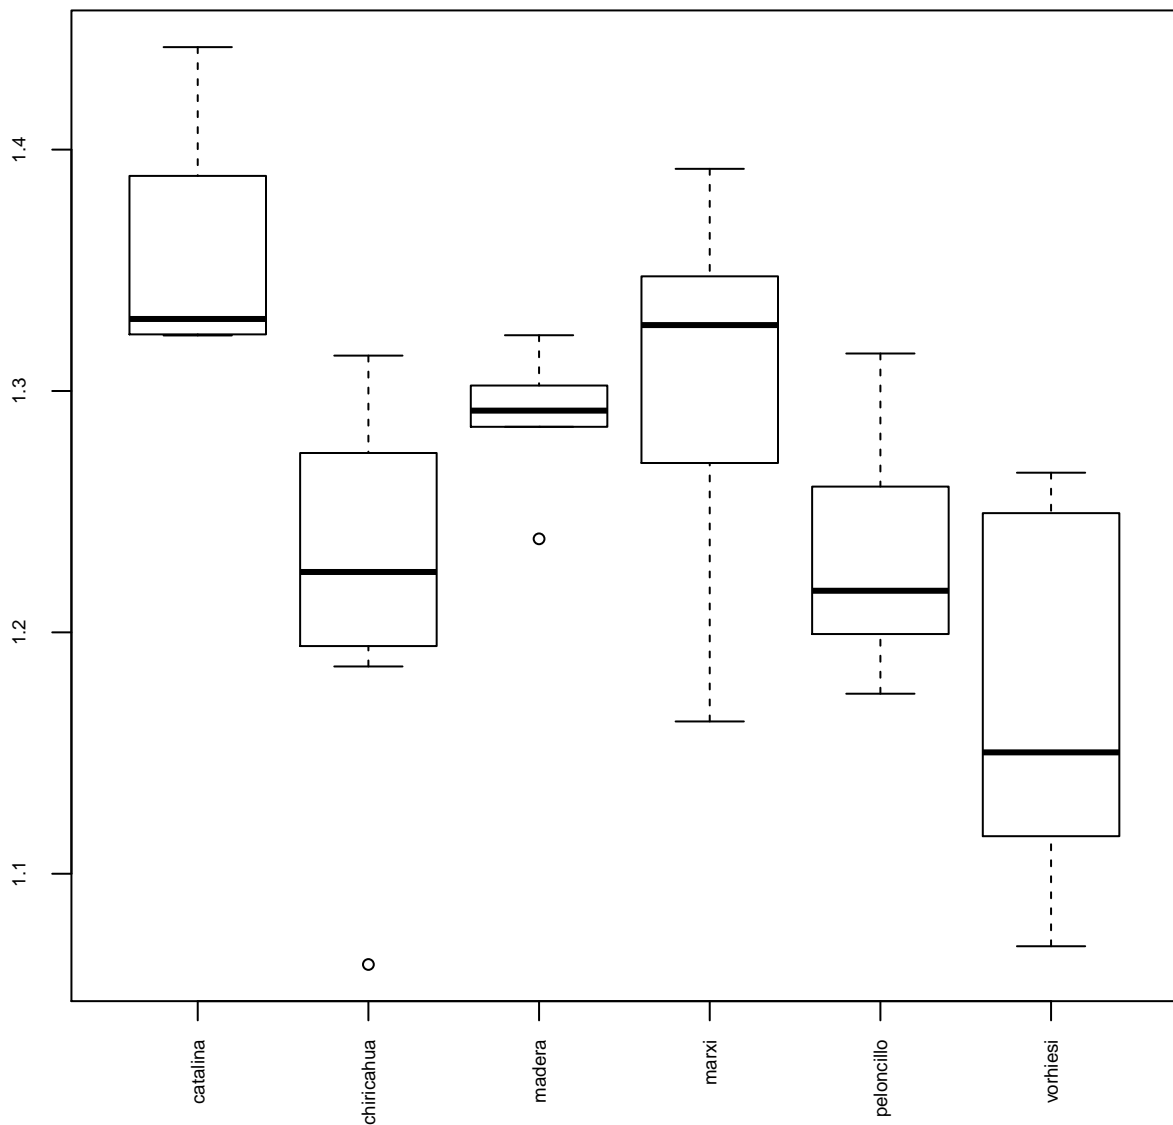

Supplement: Supplementary file 162

# Femur 1/Patella 3 ratio – females

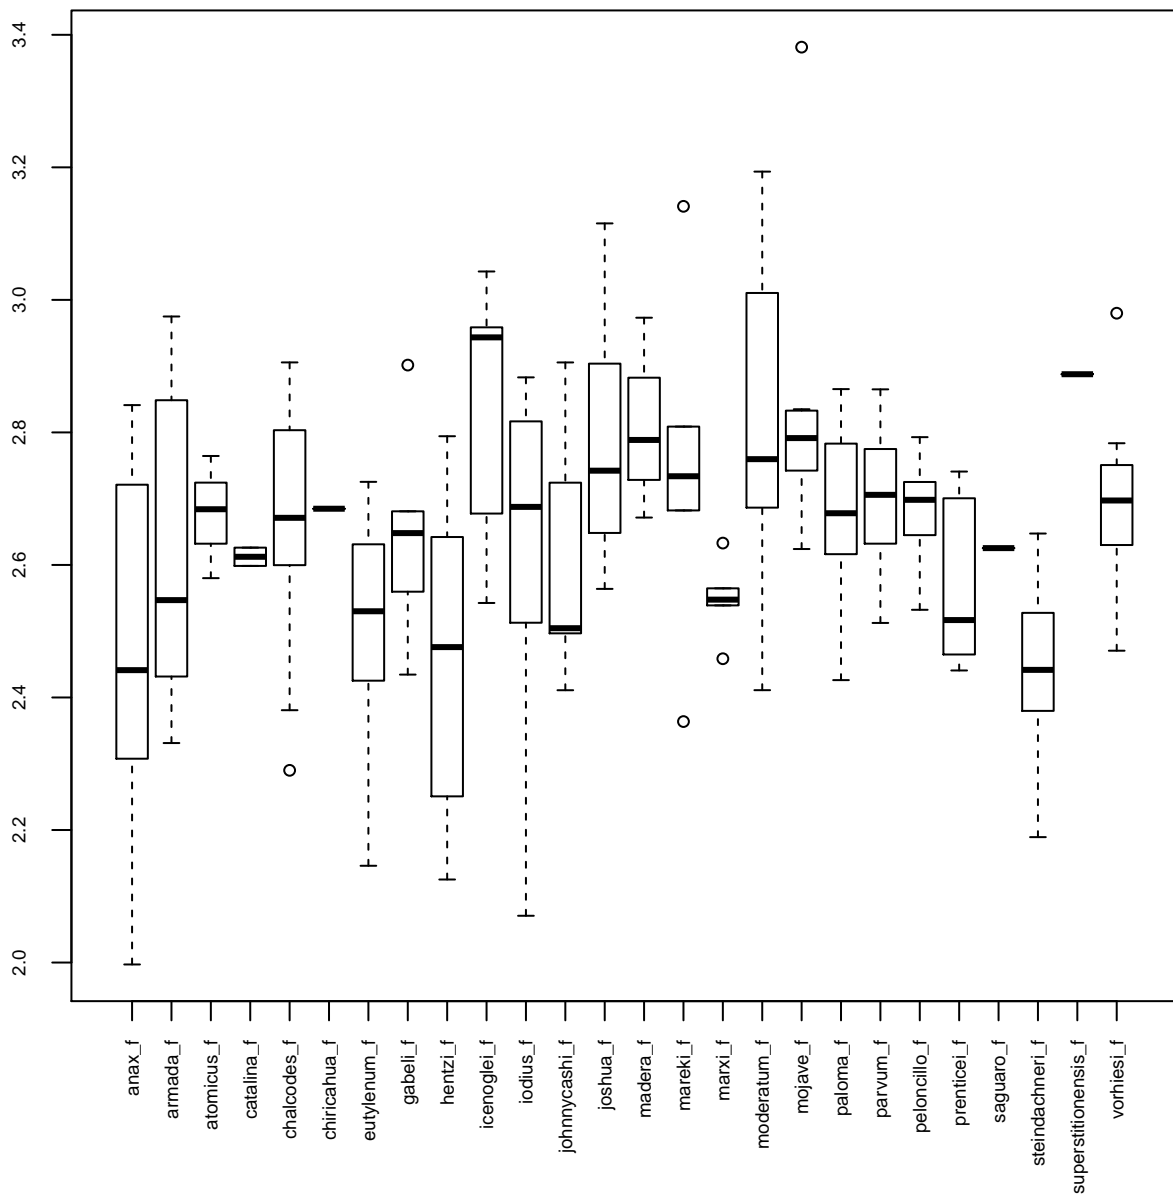

Supplement: Supplementary file 163

## Carapace Length/Palpal Tibia Width ratio – males

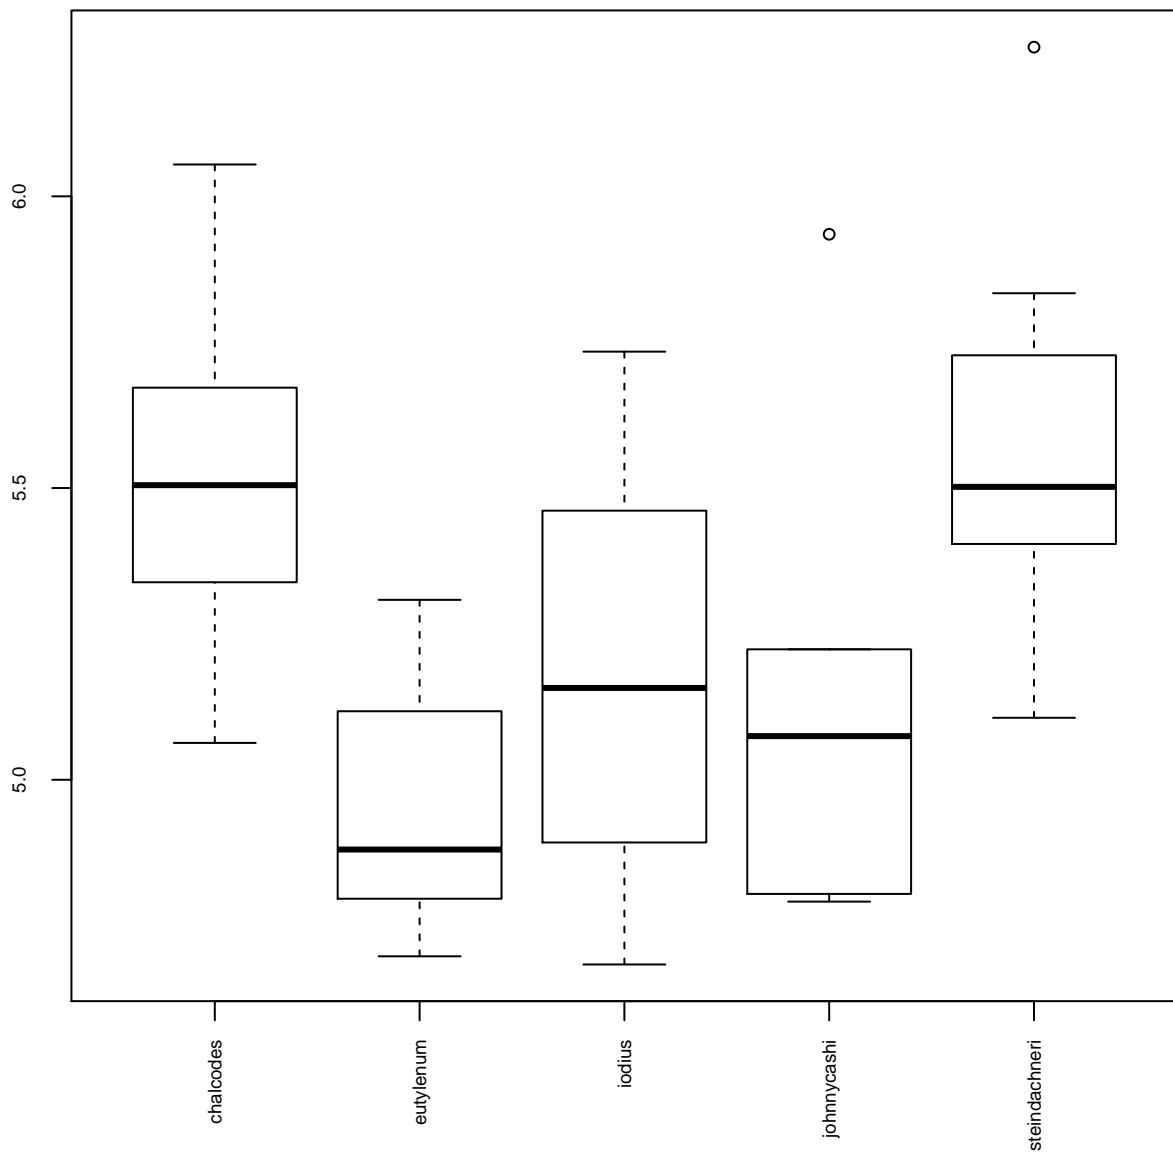

Supplement: Supplementary file 164

# Tibia 3/Tibia 4 ratio – females

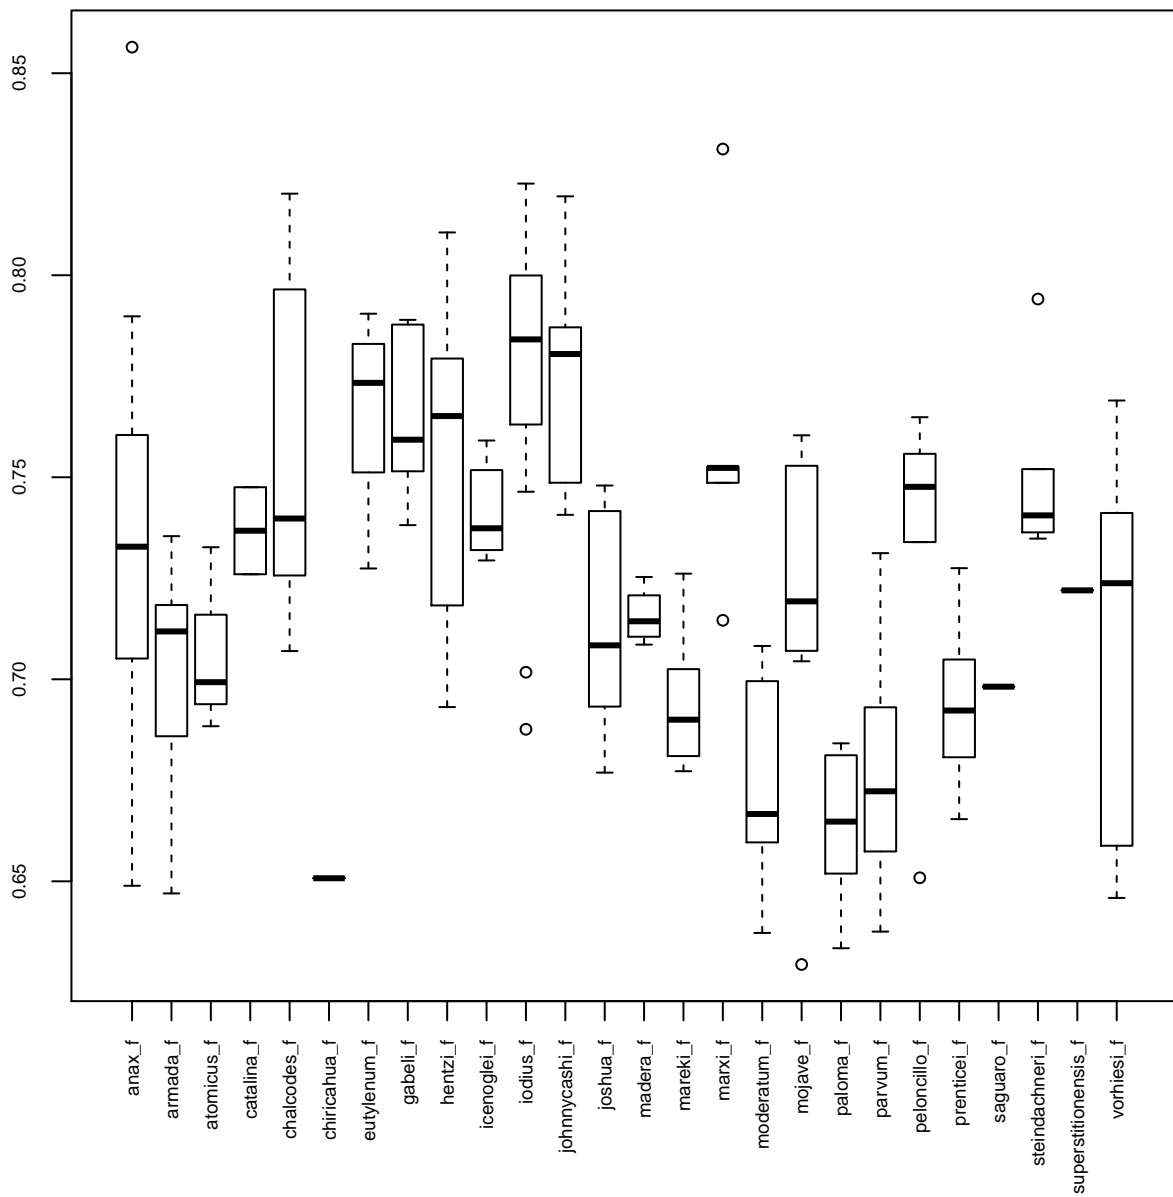

Supplement: Supplementary file 165

## Carapace Width – females

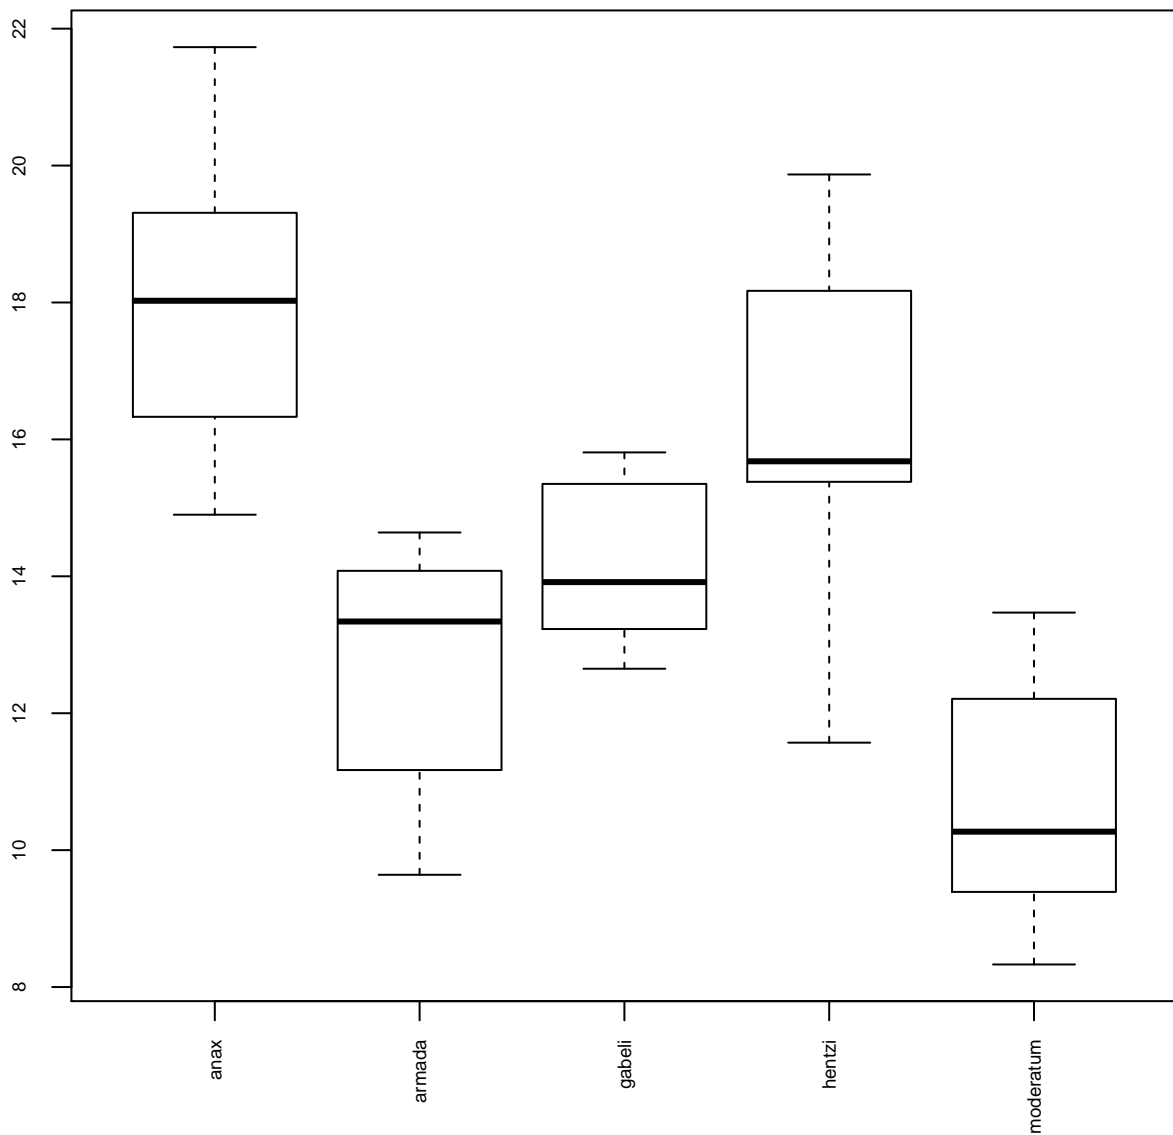

Supplement: Supplementary file 166

Palpal Tibia/Patella 3 Length ratio – males

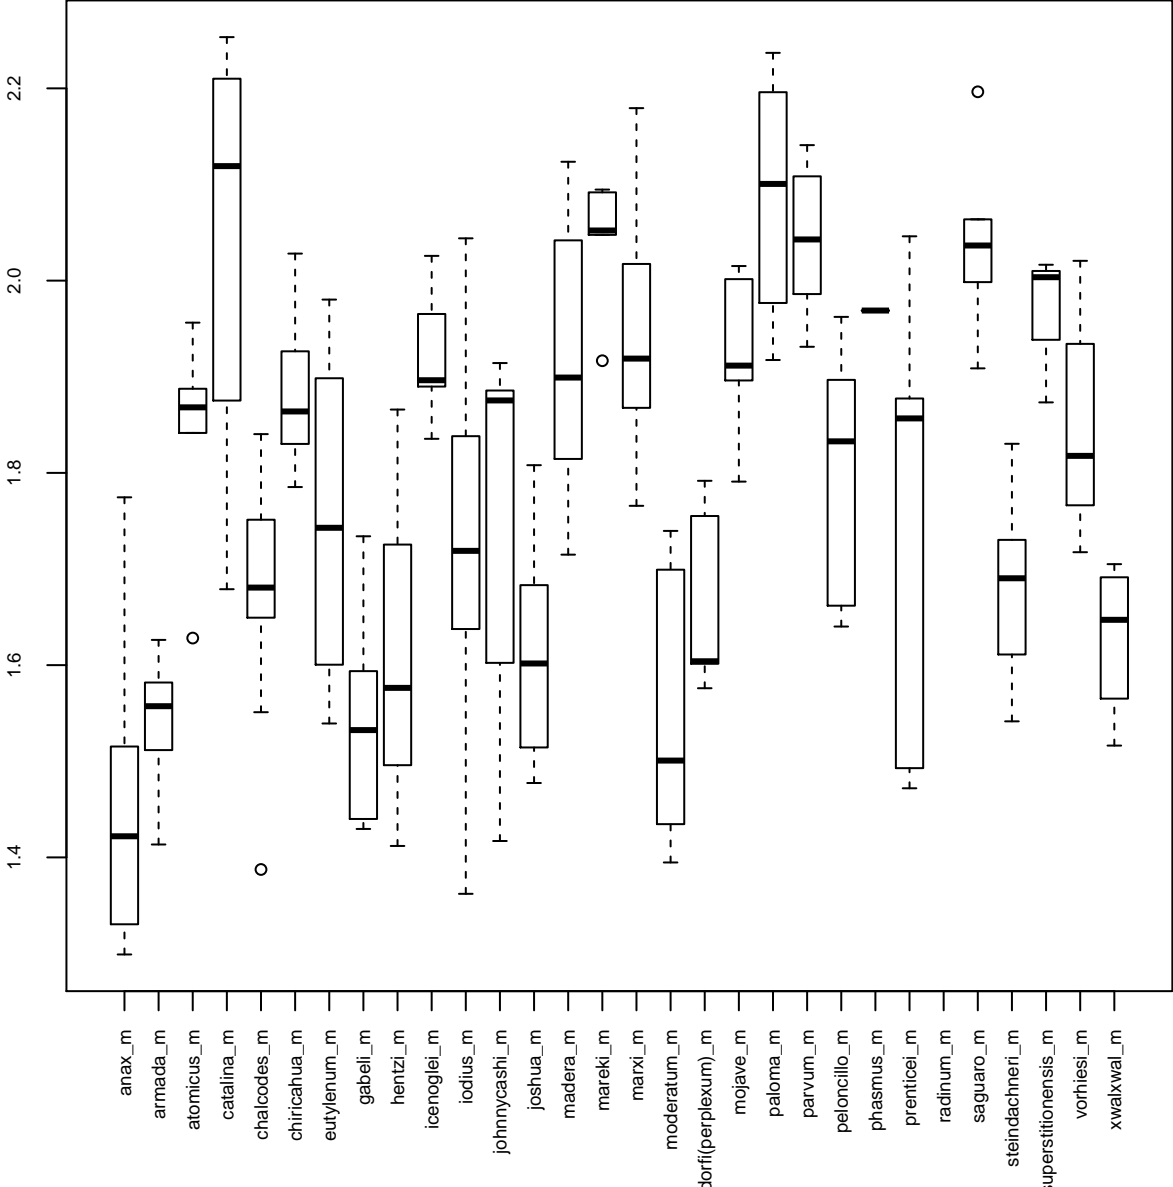

Supplement: Supplementary file 167

## Tibia 3/Tibia 4 ratio – males

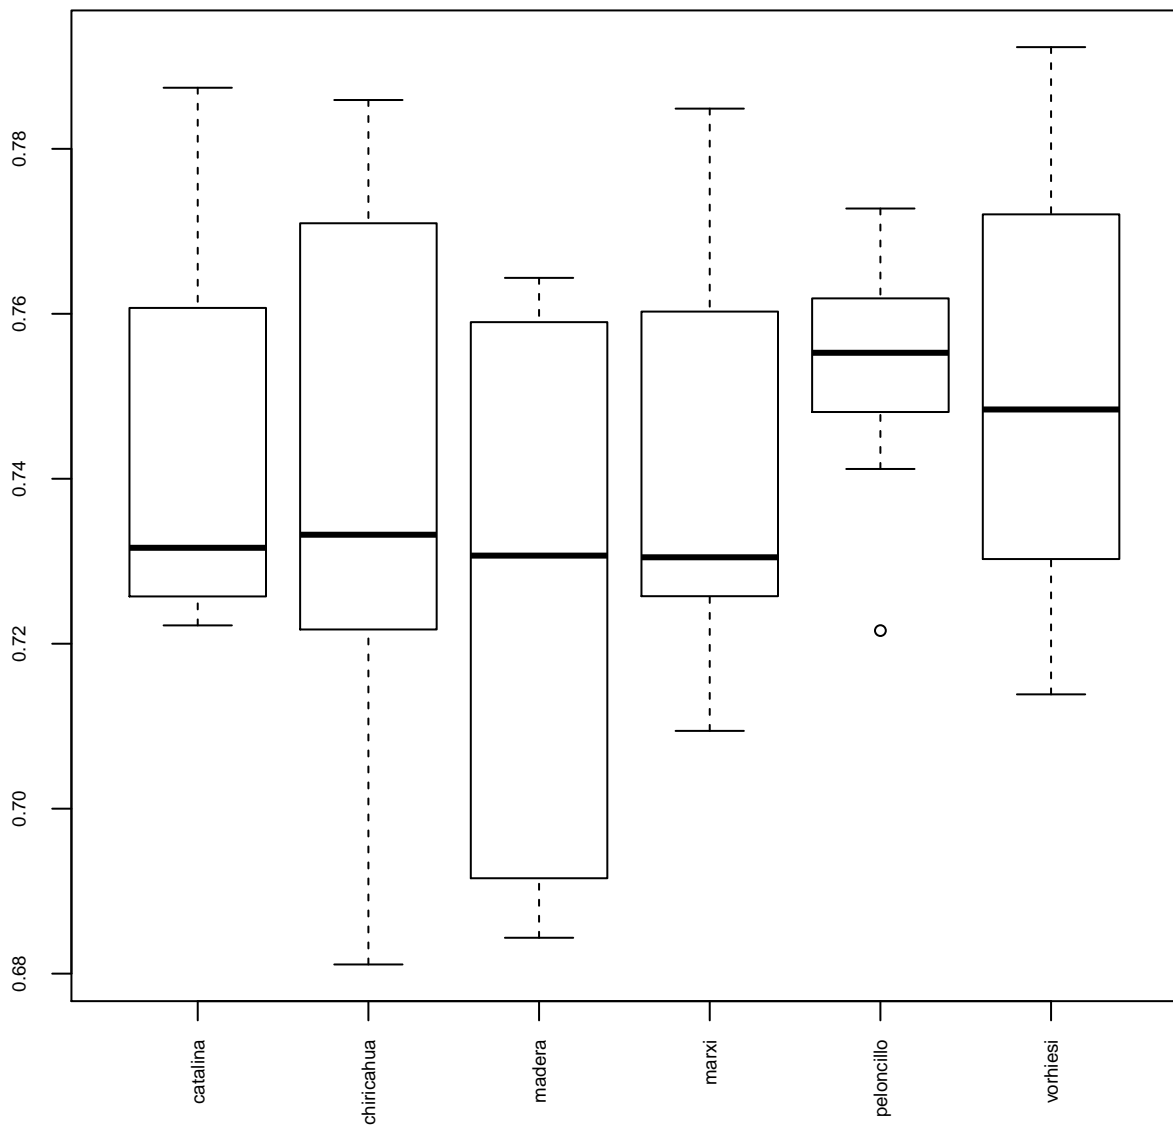

Supplement: Supplementary file 168

## Patella 1/Tarsus 4 Length ratio – females

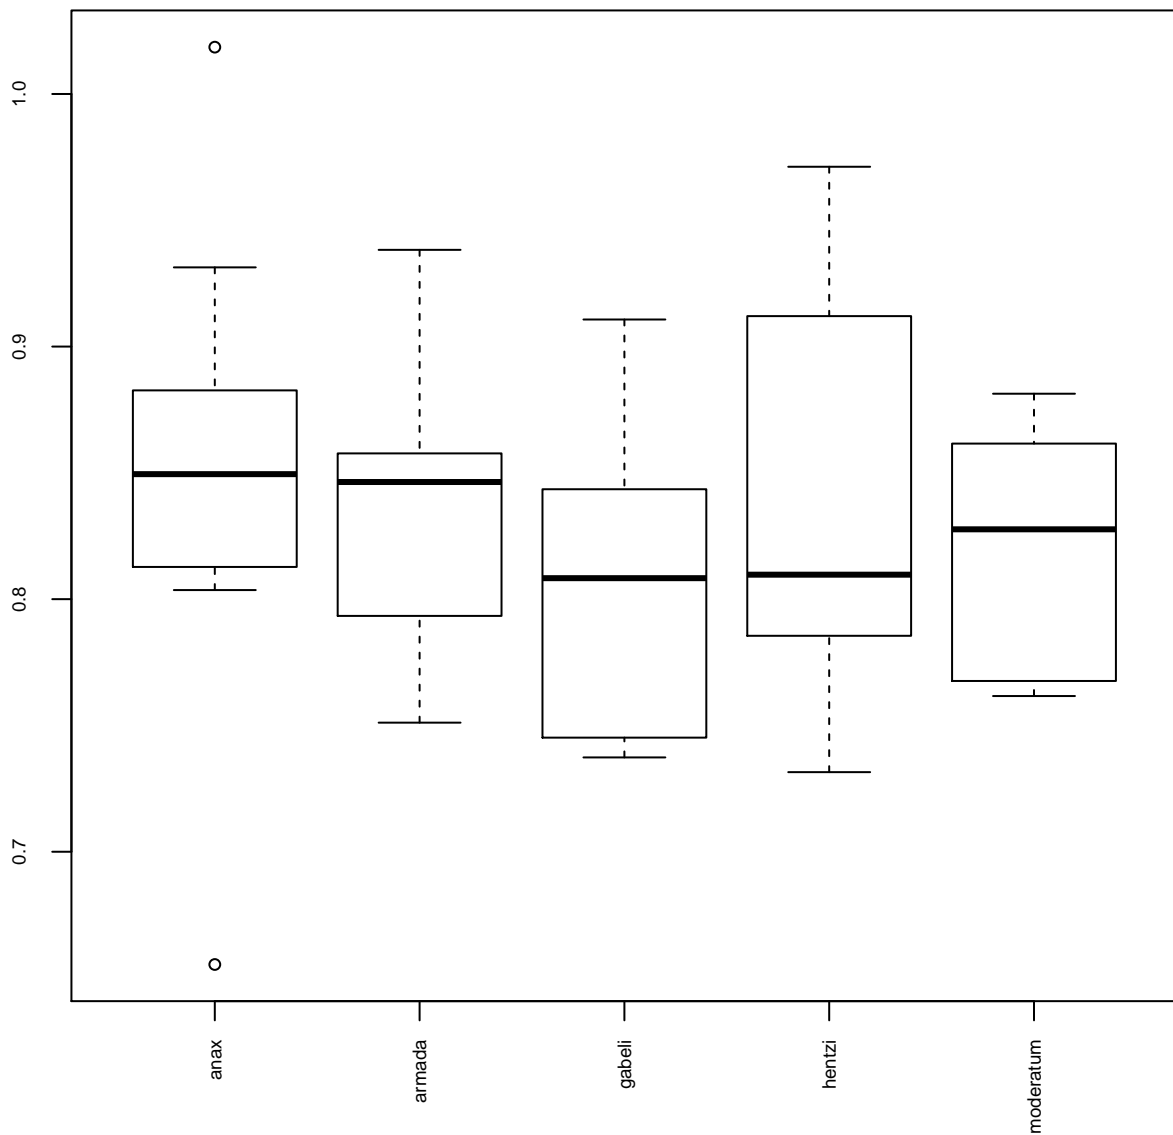

Supplement: Supplementary file 169

# Carapace Length/Tarsus 1 ratio – females

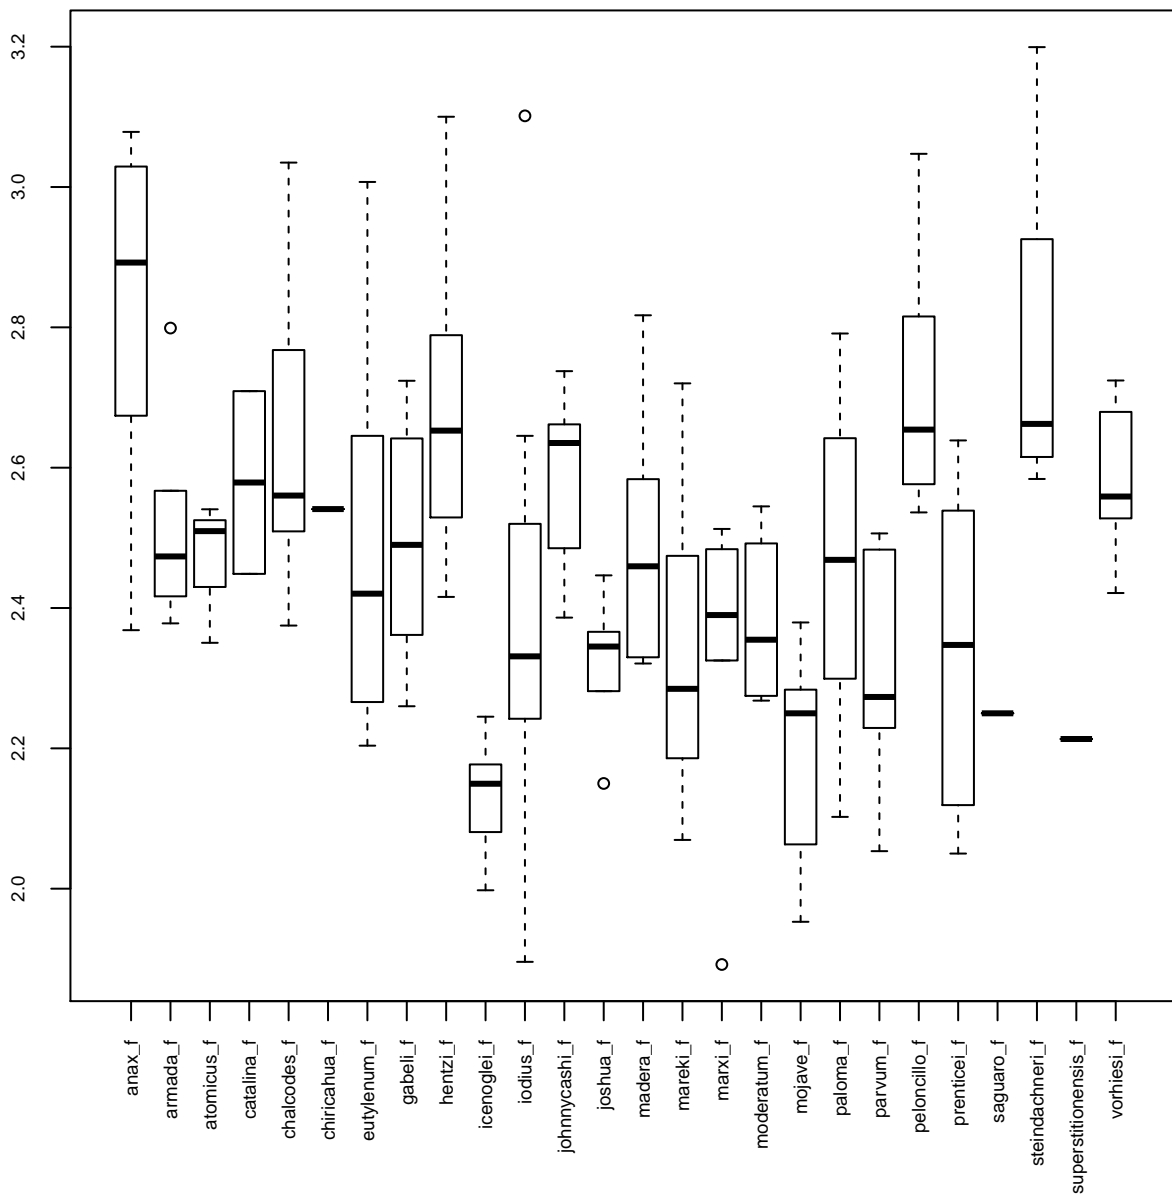

Supplement: Supplementary file 170

## Palpal Tibia/Patella 1 Length ratio – males

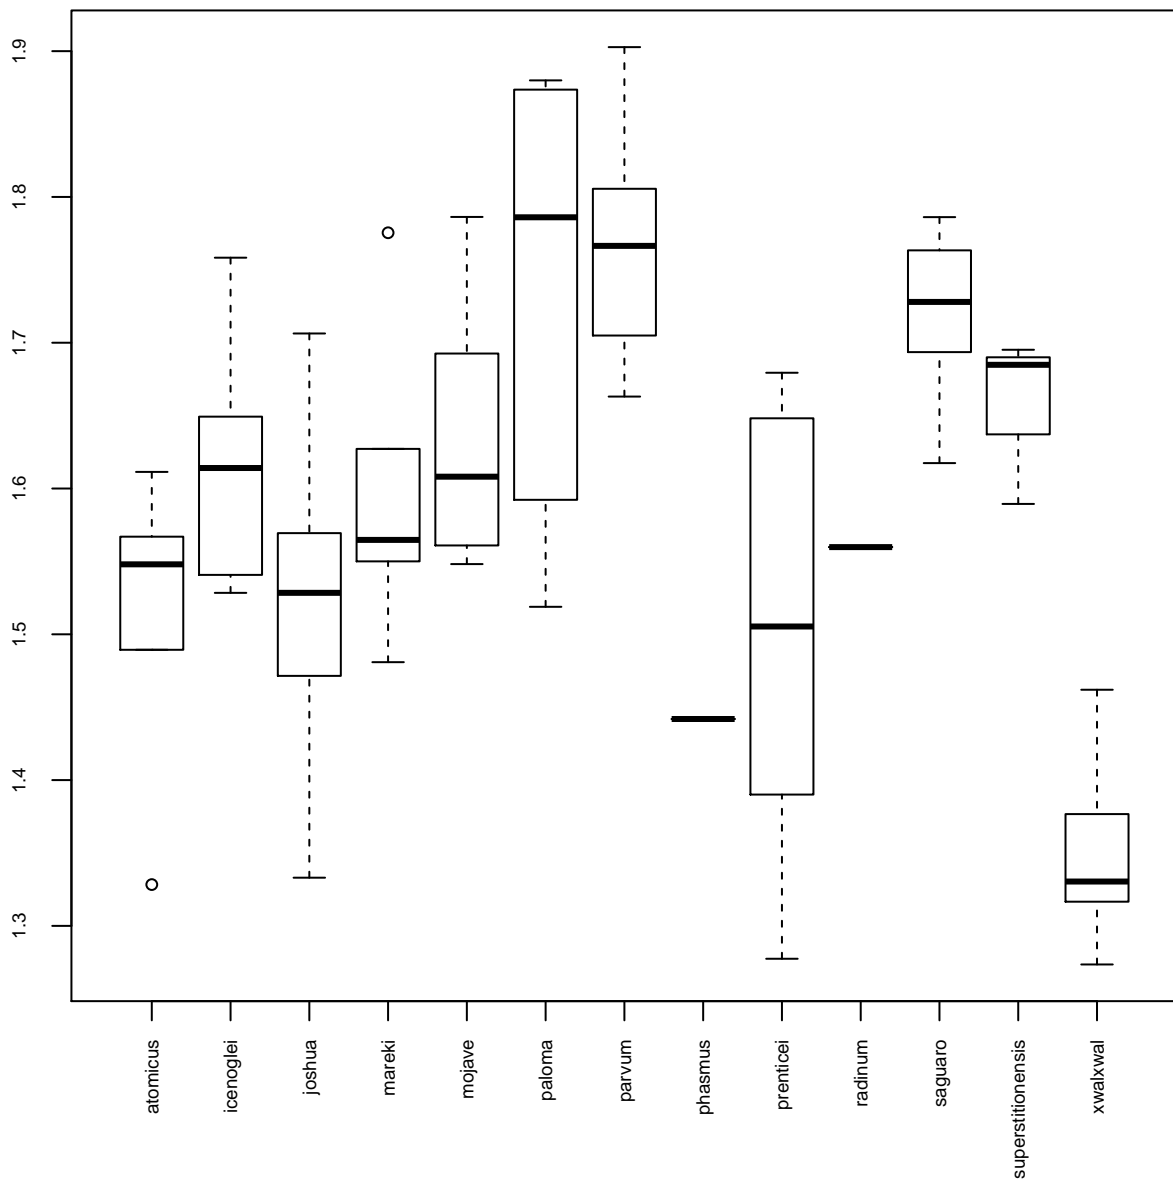

Supplement: Supplementary file 171

## Palpal Tibia/Tibia 1 Length ratio – males

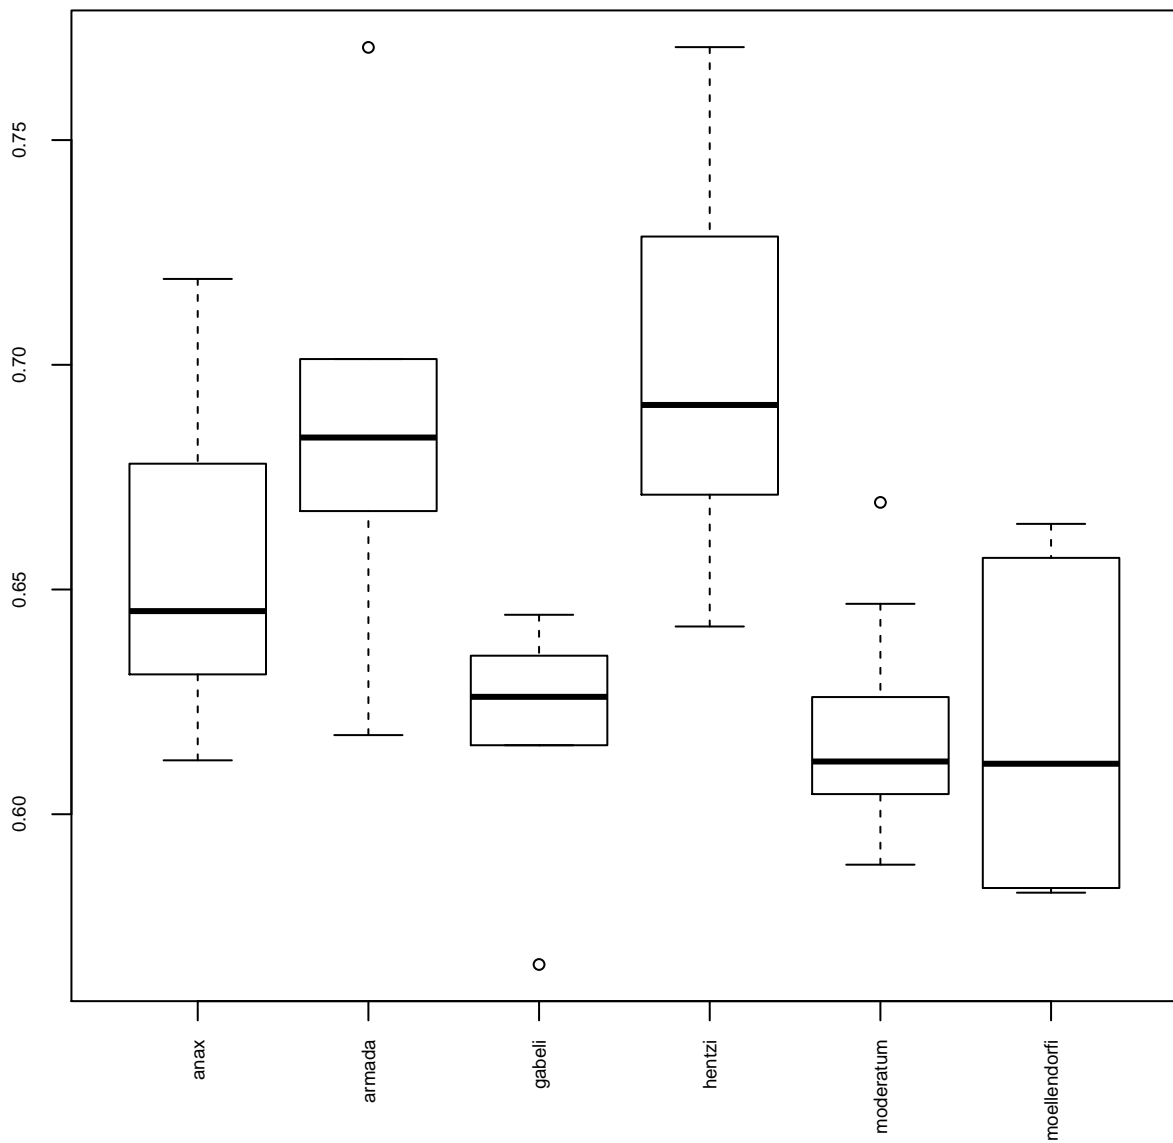

Supplement: Supplementary file 172

## Femur 3/Metatarsus 3 ratio – females

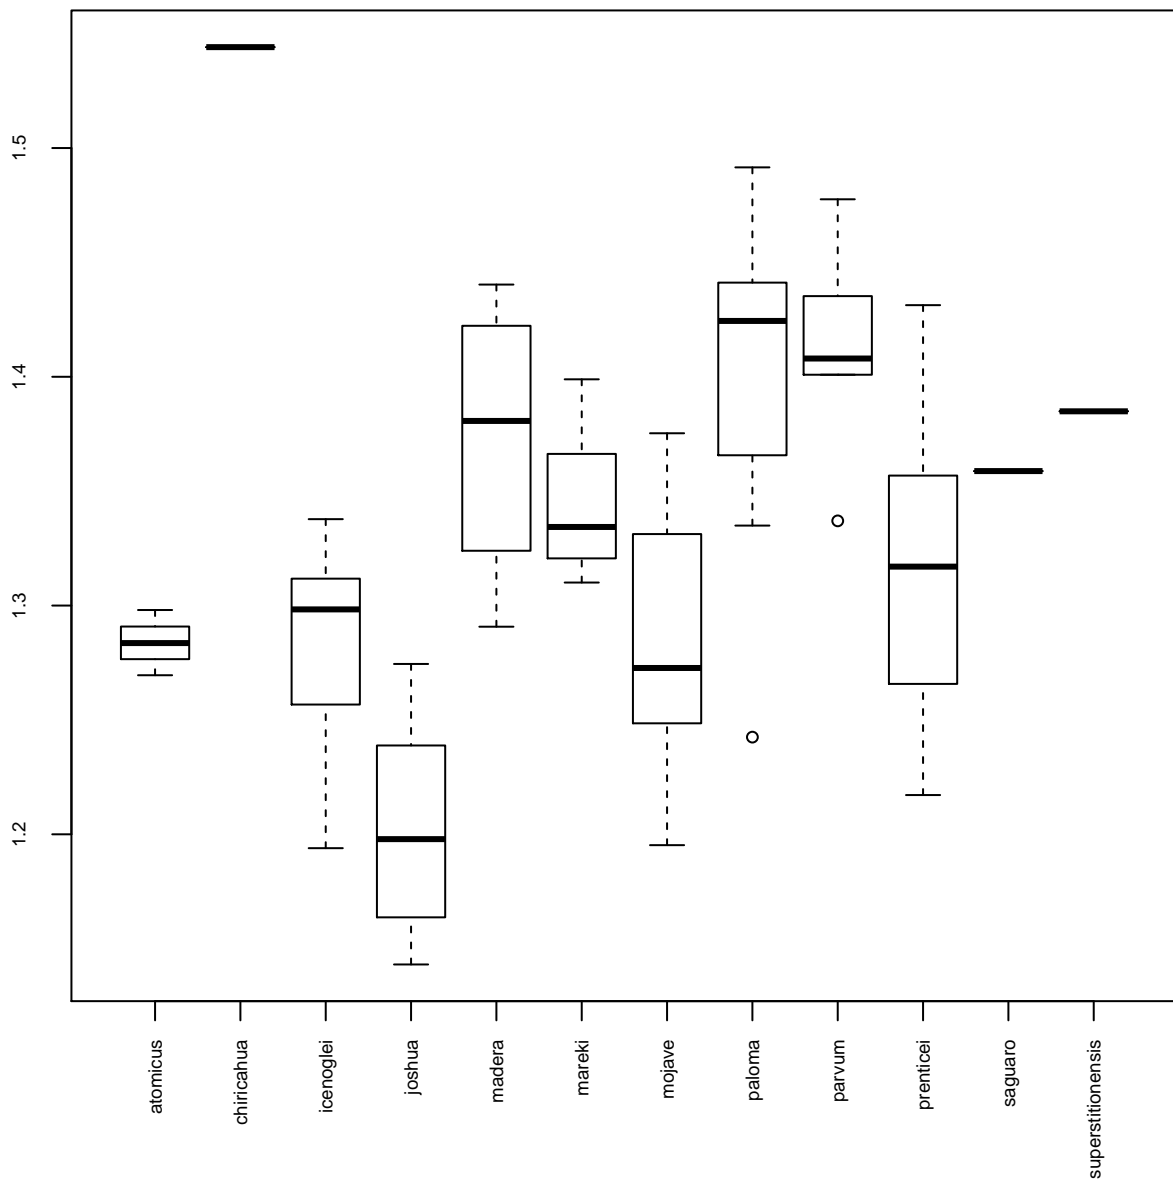

Supplement: Supplementary file 173

## Carapace Length/Palpal Tibia Length ratio – males

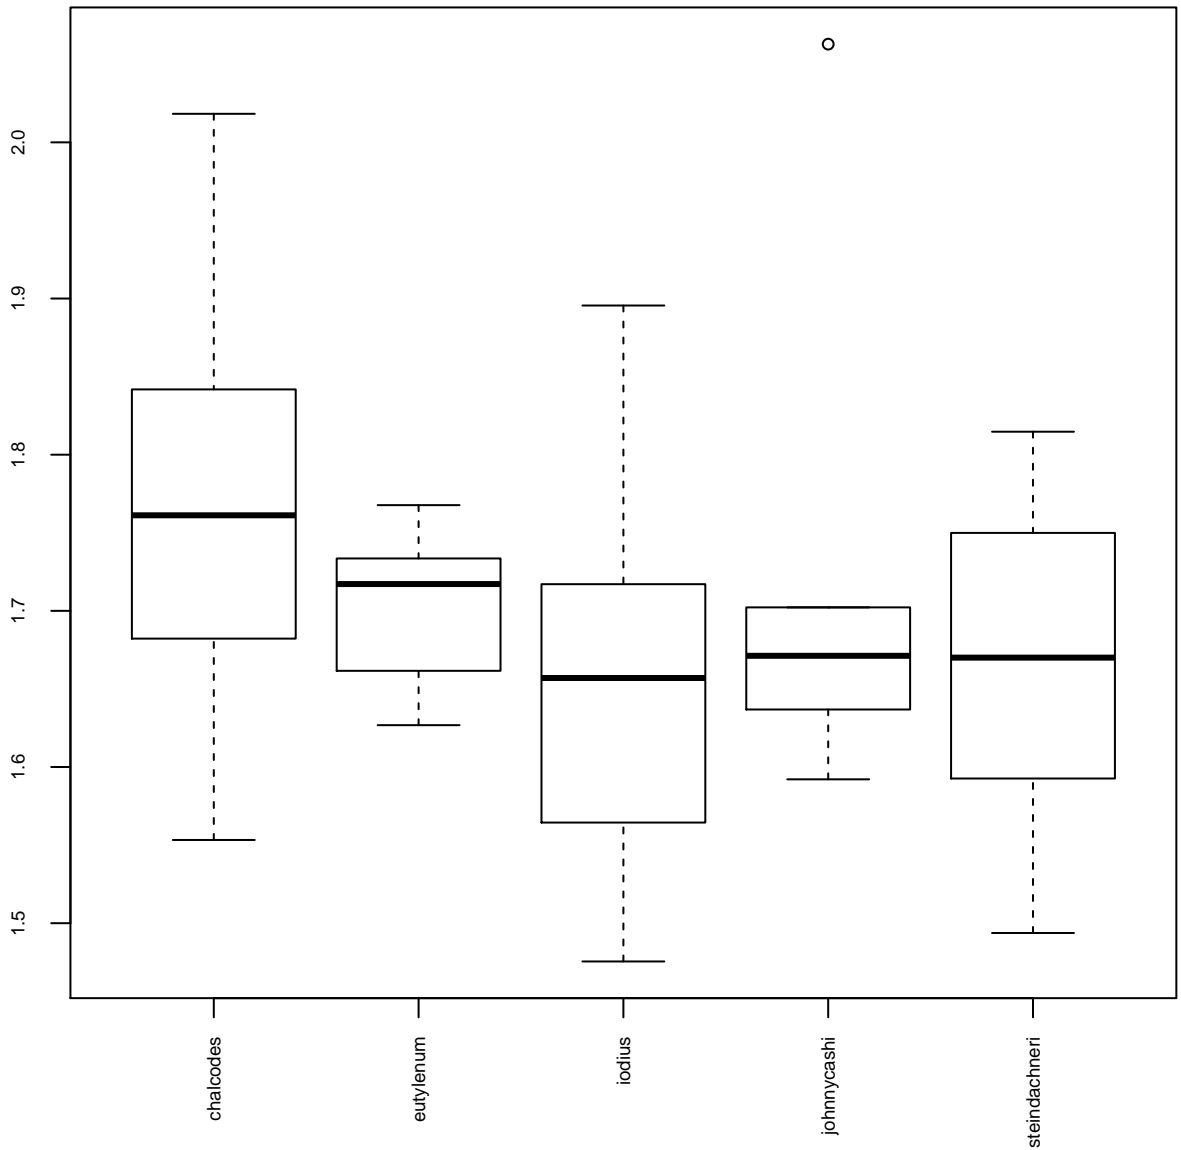

Supplement: Supplementary file 174

## Carapace Length/Patella 3 ratio – males

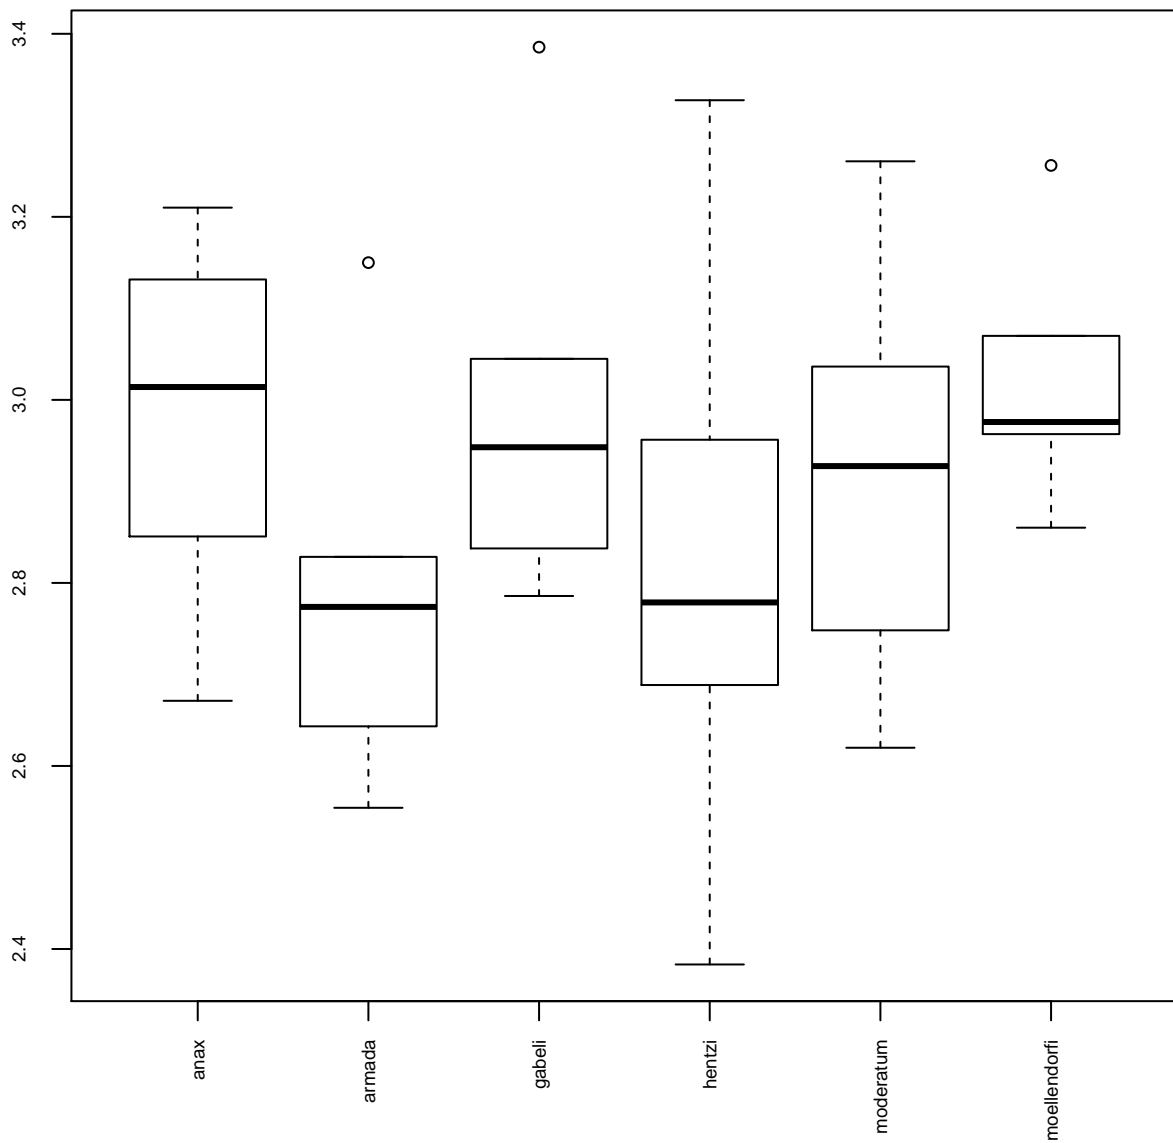

Supplement: Supplementary file 175

## Carapace Length/Tarsus 3 ratio – females

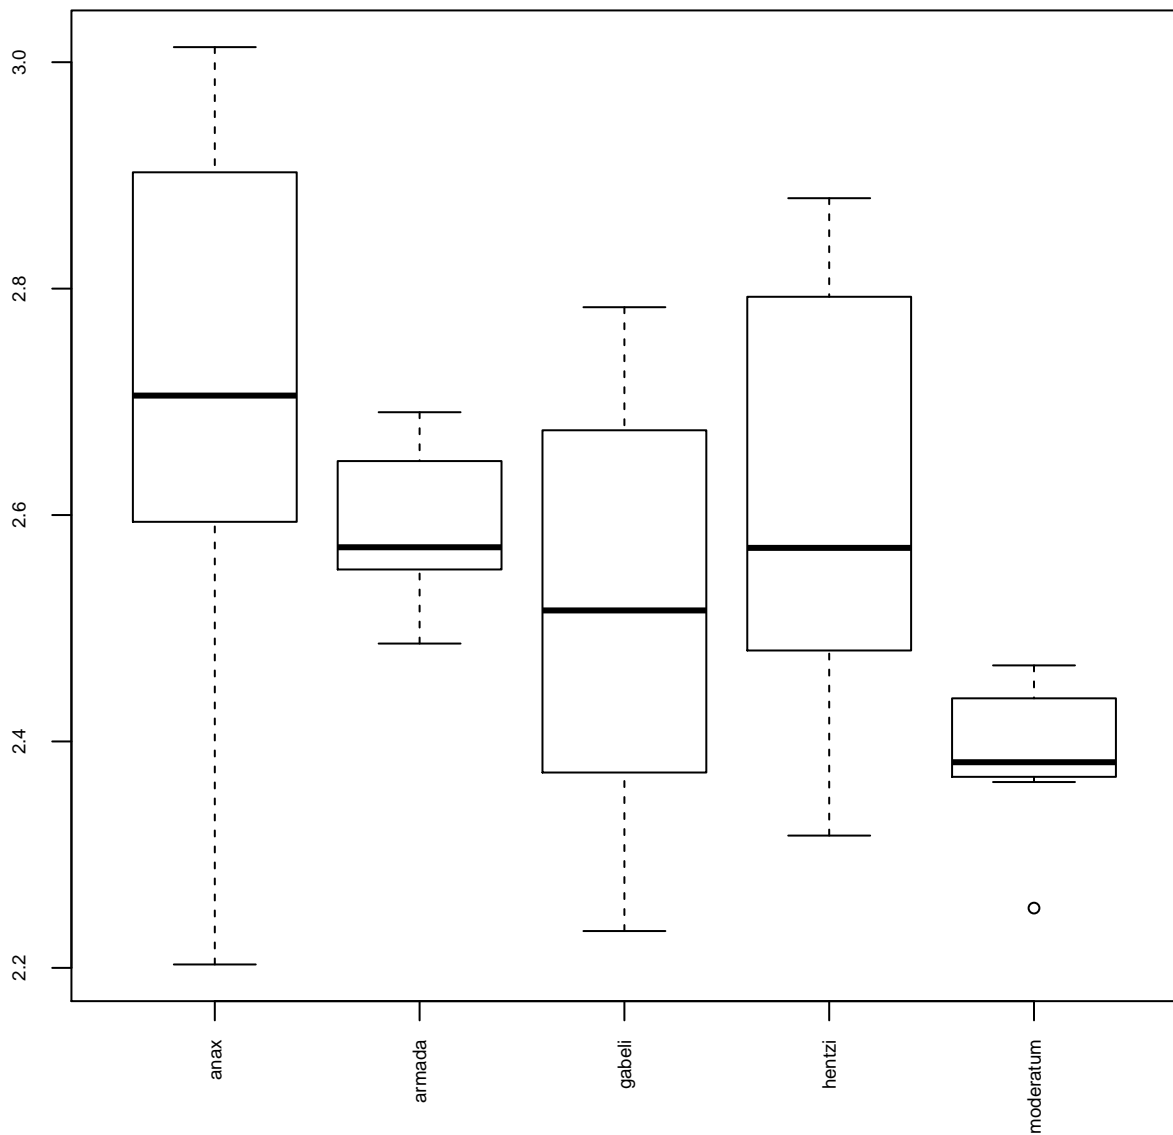

Supplement: Supplementary file 176

## Carapace Length/Tibia 3 ratio – females

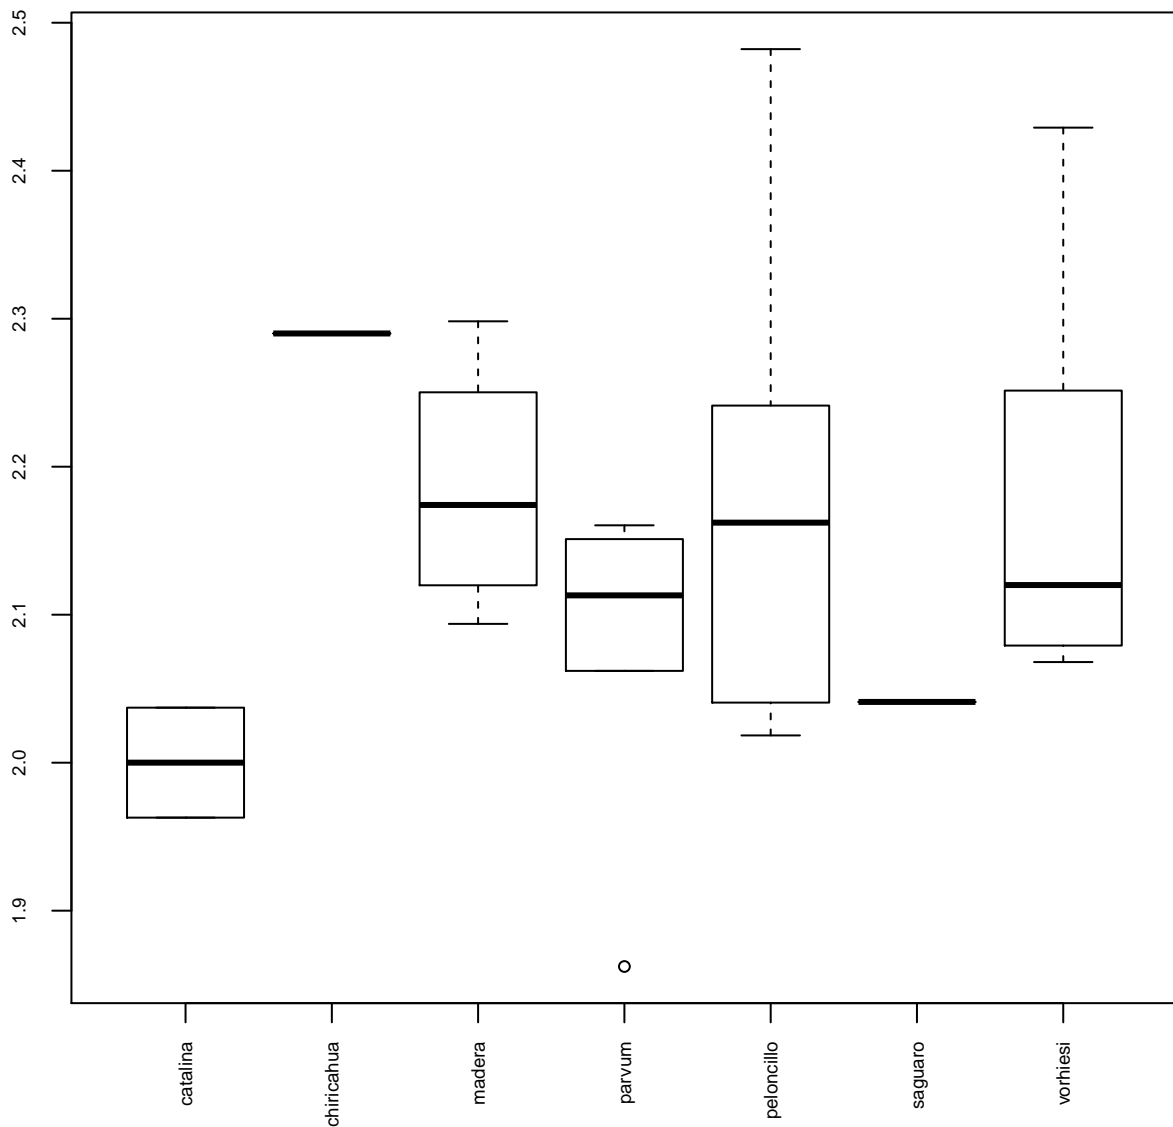

Supplement: Supplementary file 177

## Leg 3 Scopulation ratio – females

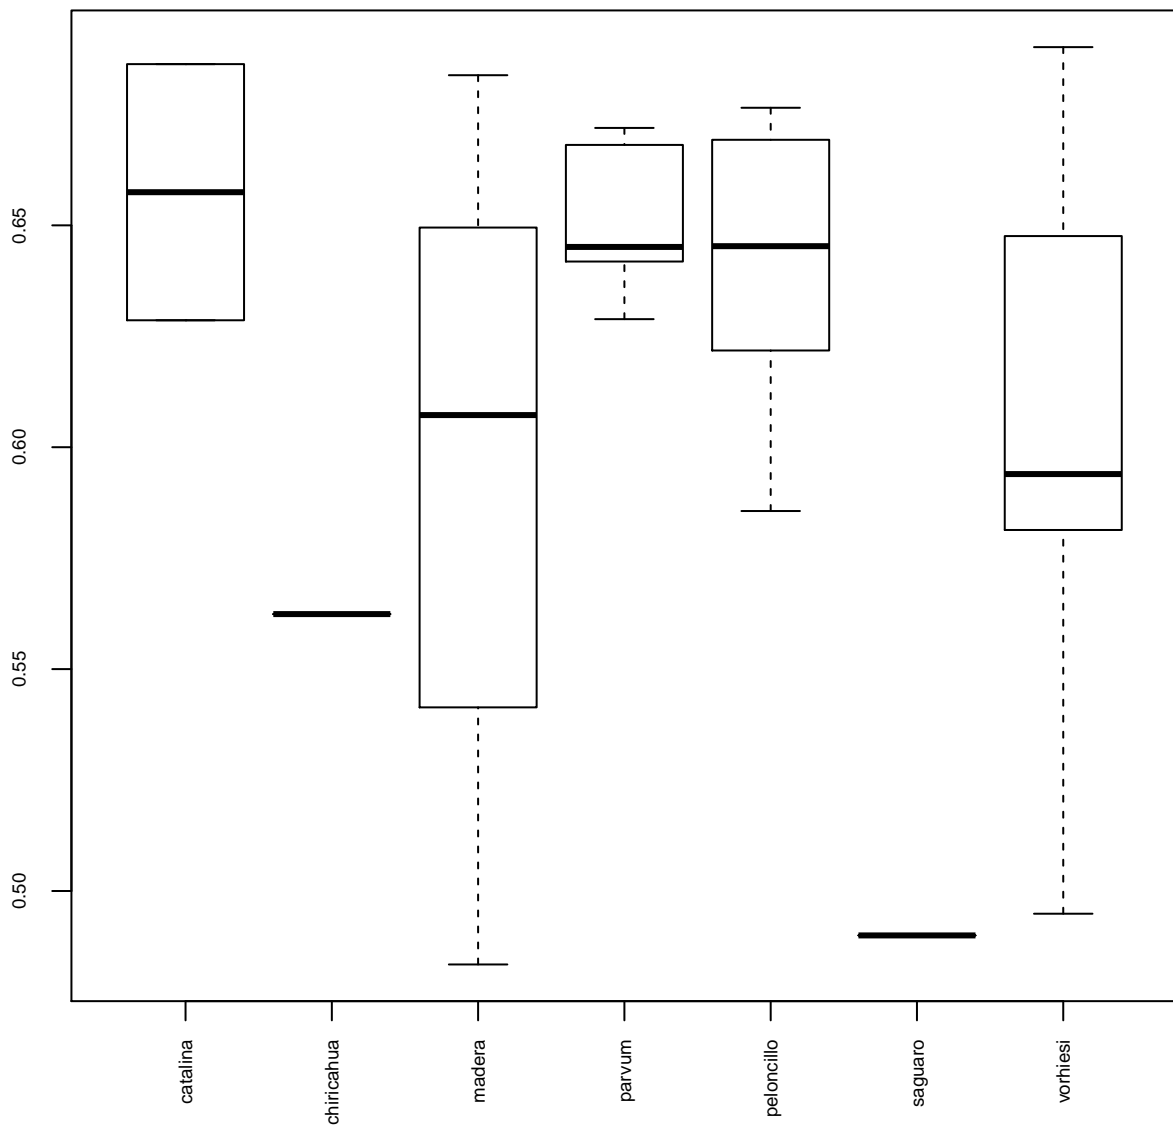

Supplement: Supplementary file 178

## Femur 1/Patella 1 ratio – females

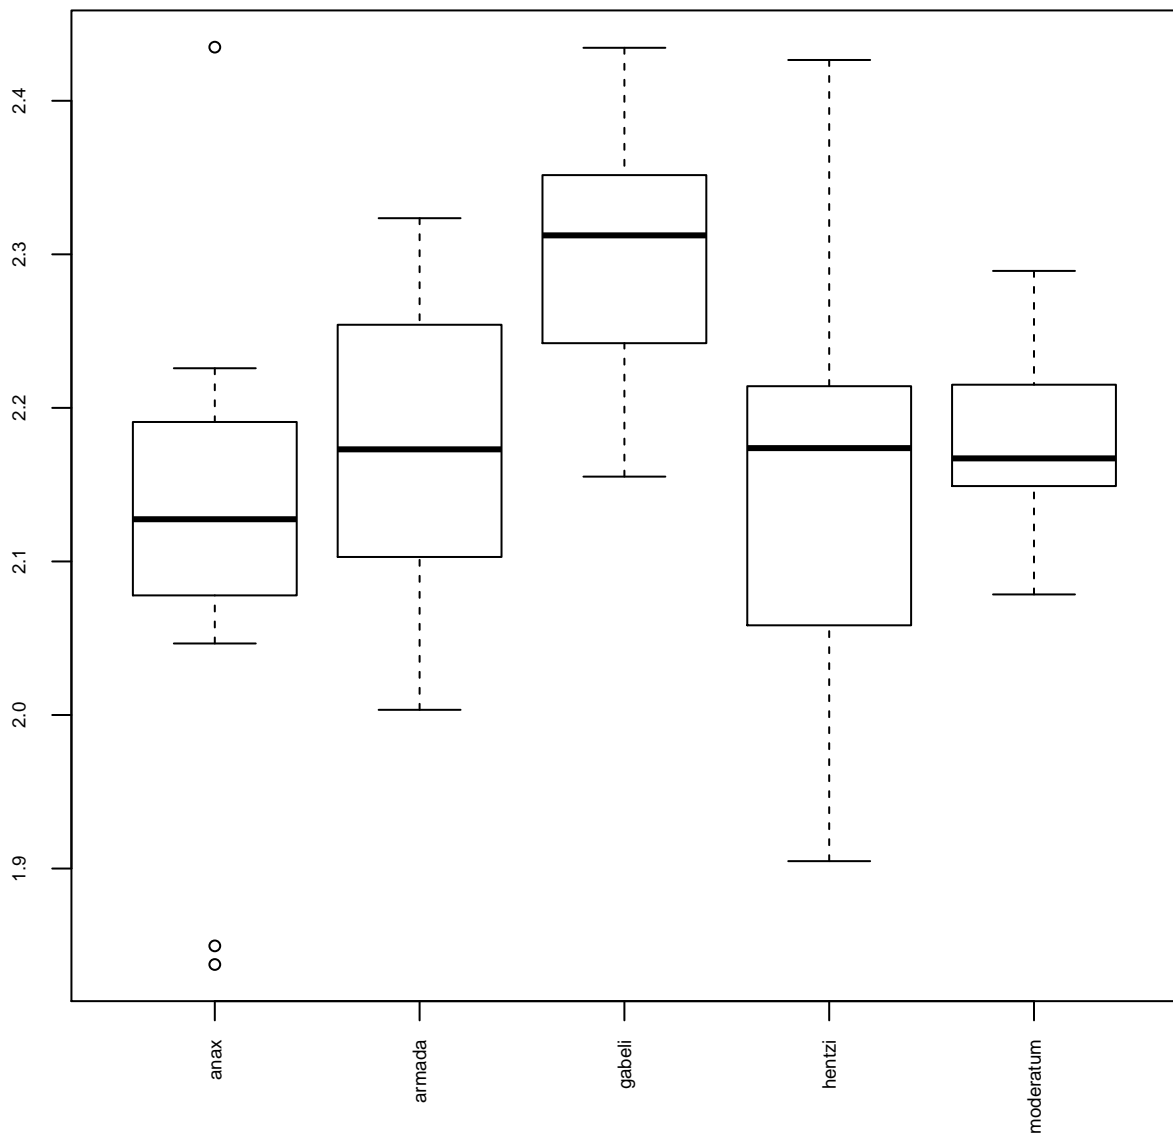

Supplement: Supplementary file 179

# Tibia 1/Tarsus 1 ratio – males

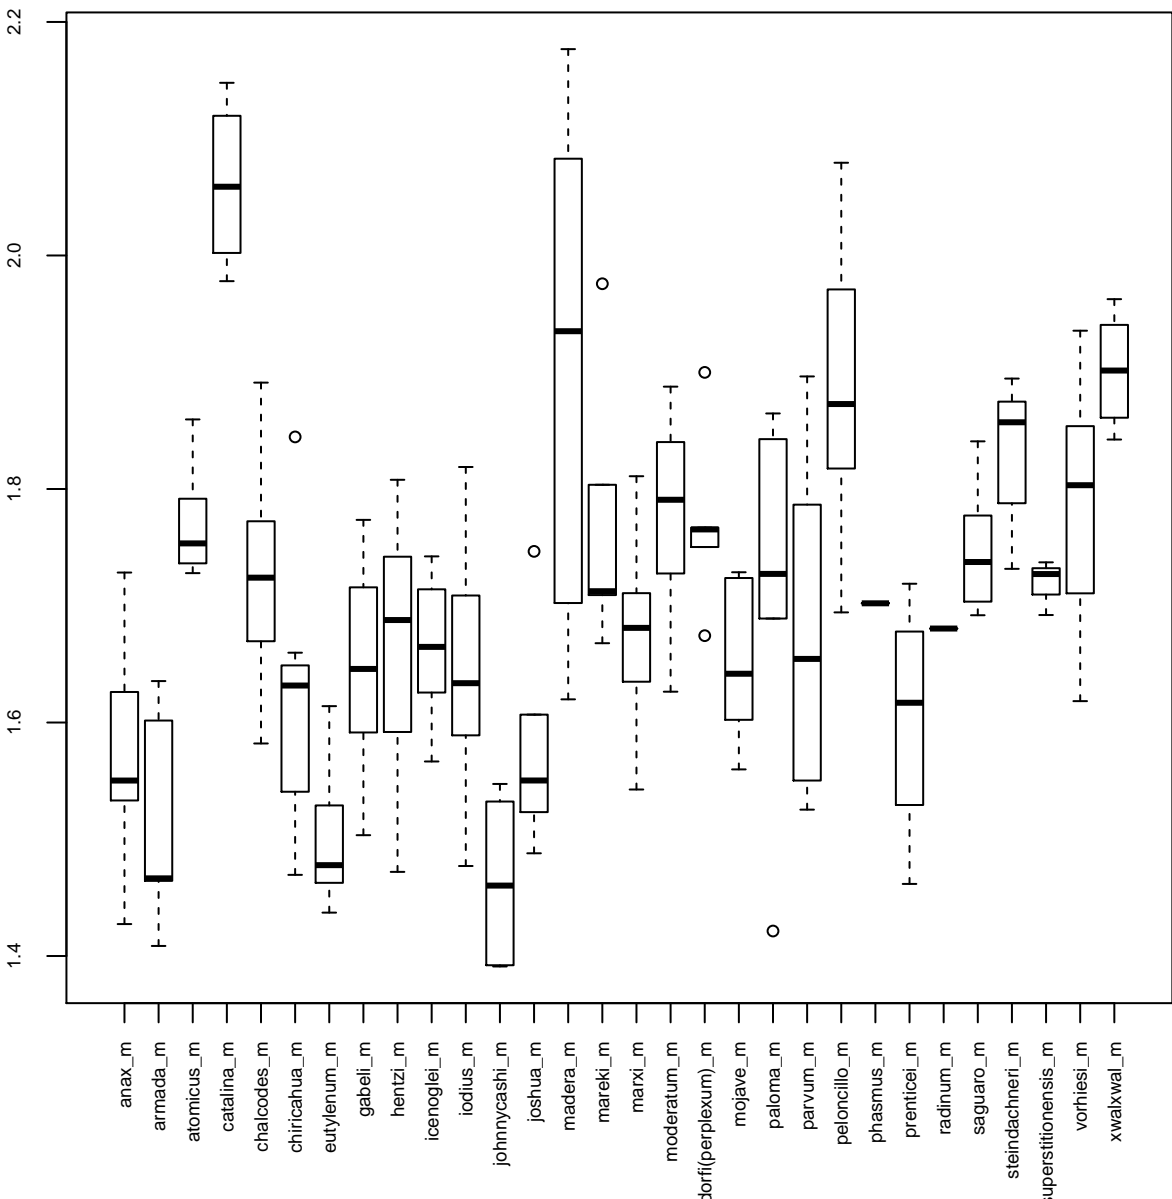

Supplement: Supplementary file 180

# Tibia 1/Femur 4 Length ratio – males

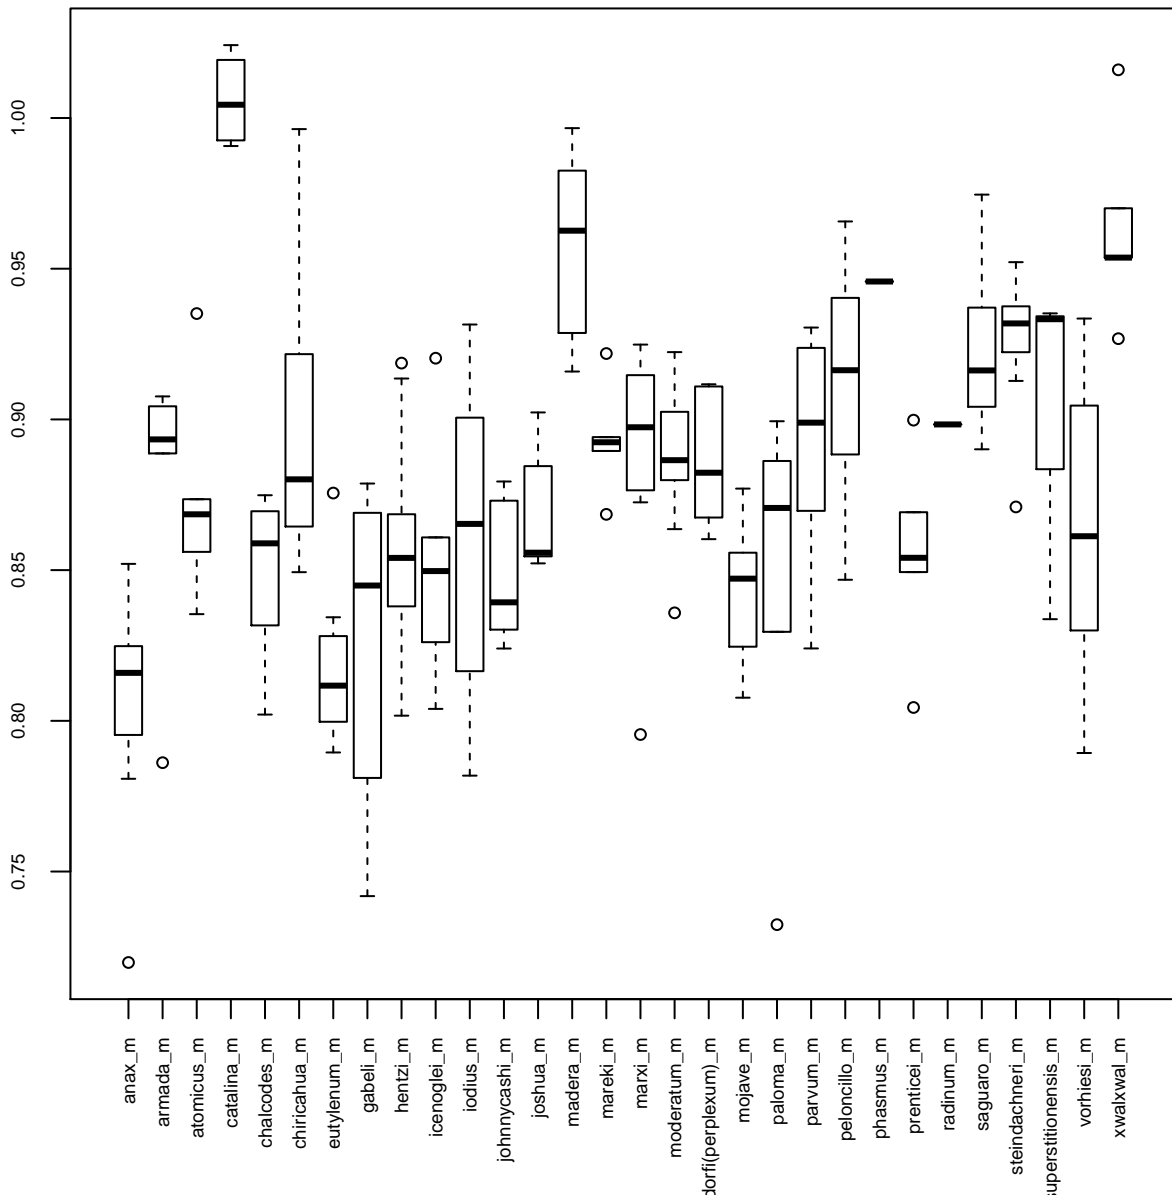

Supplement: Supplementary file 181

## Tarsus 1/Tarsus 4 ratio – males

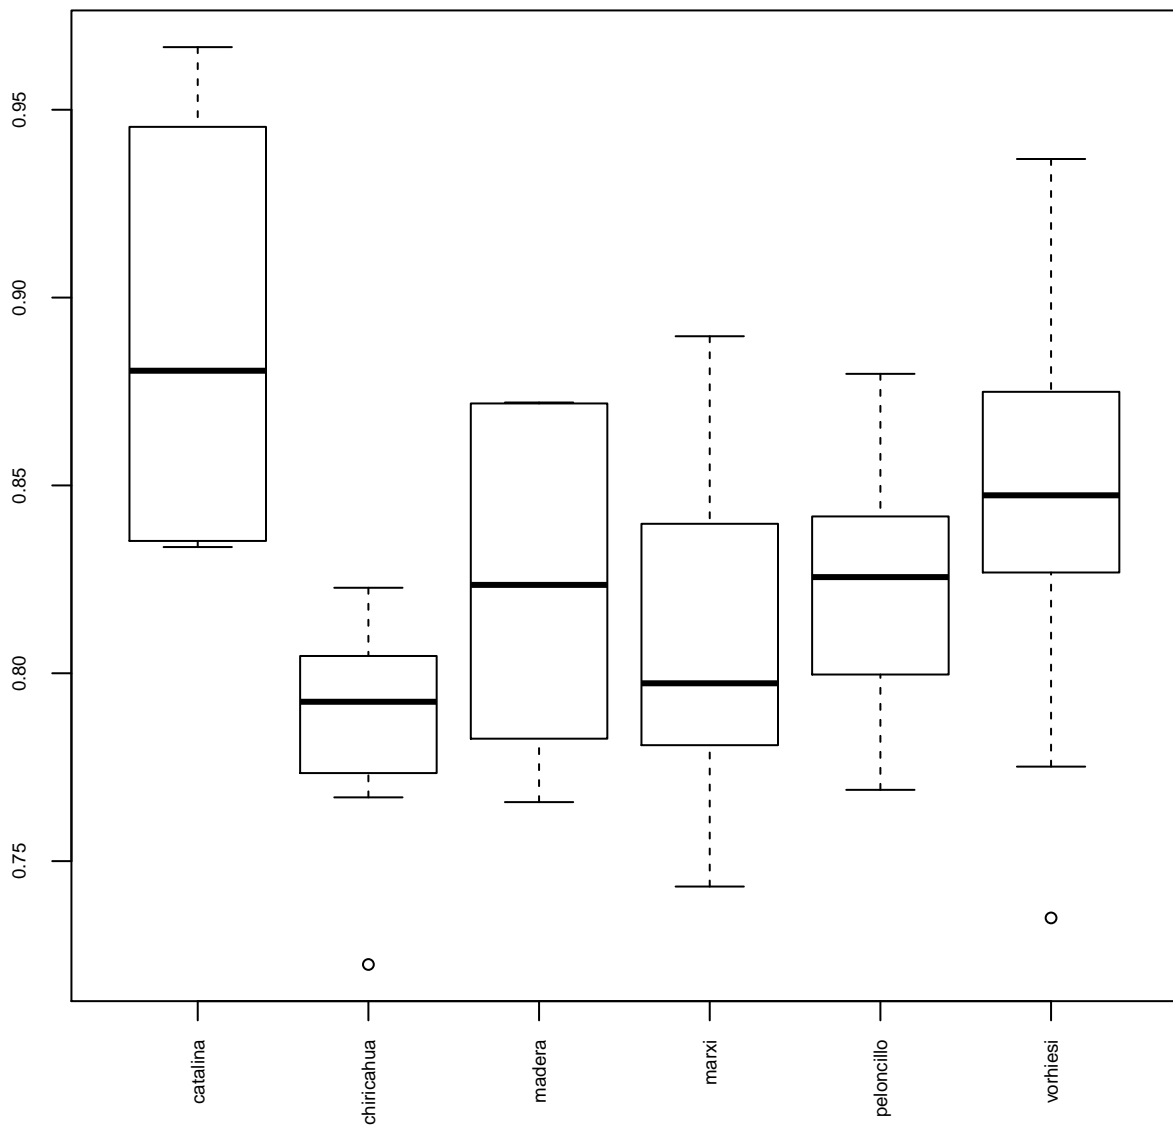

Supplement: Supplementary file 182

## Carapace Length/Width ratio – females

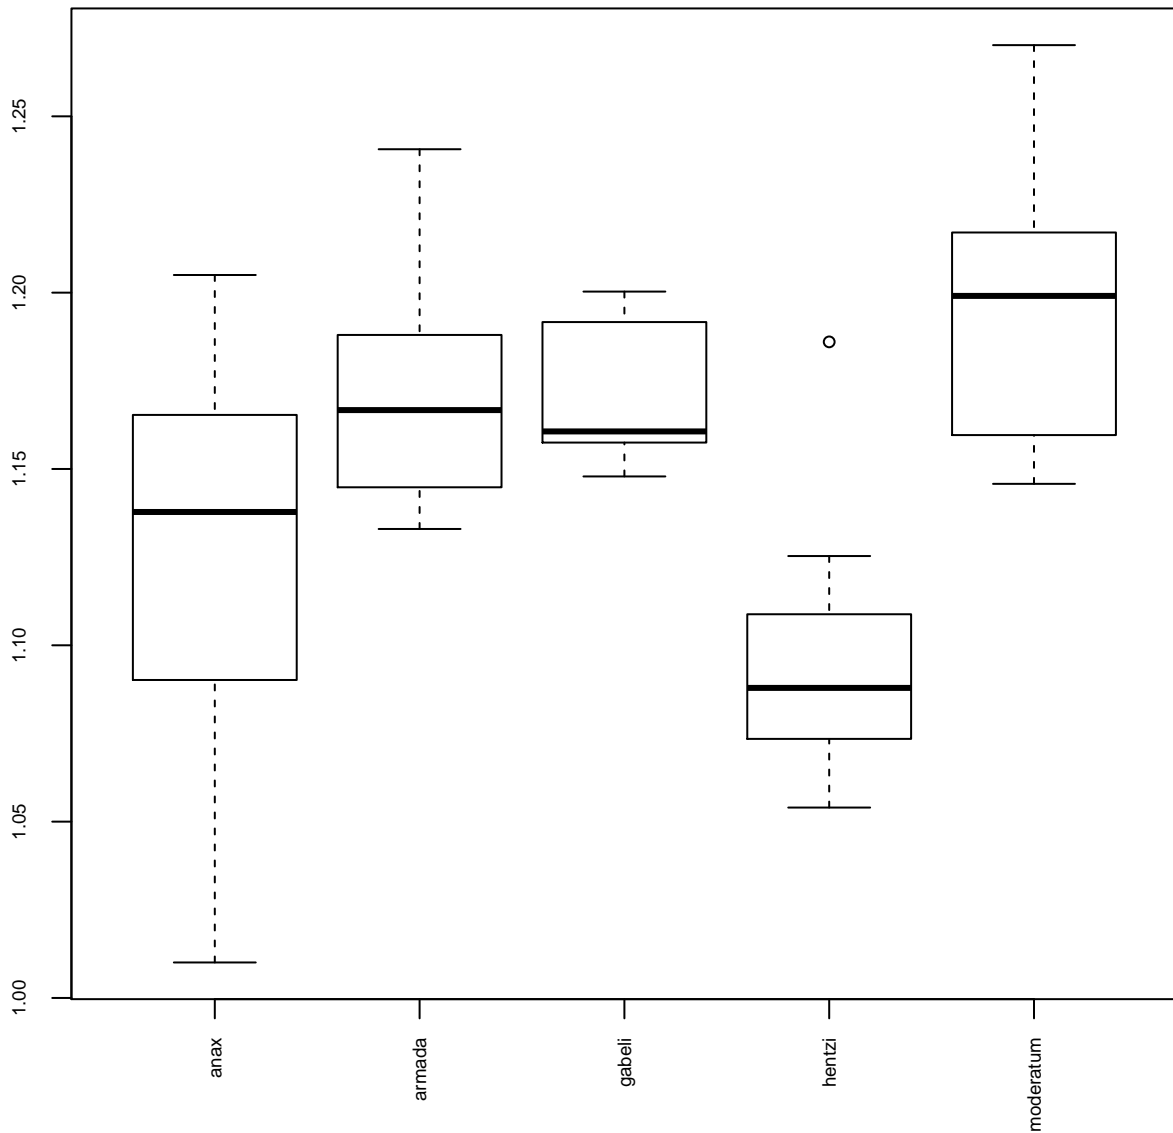

Supplement: Supplementary file 183

## Carapace Length/Metatarsus 4 ratio – males

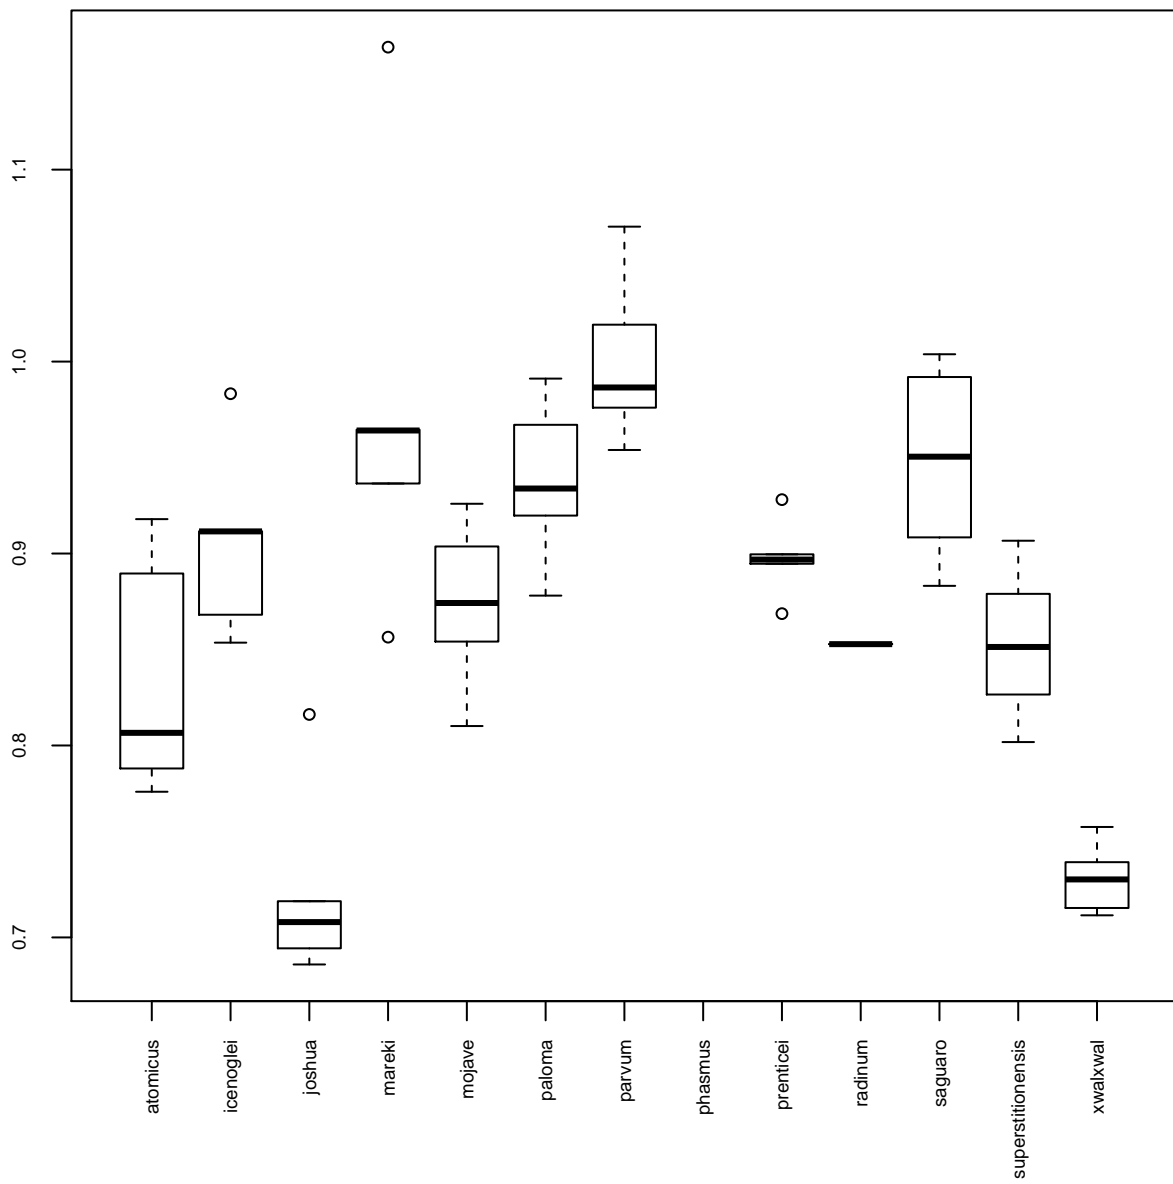

Supplement: Supplementary file 184

## Tarsus 1/Tibia 3 Length ratio – males

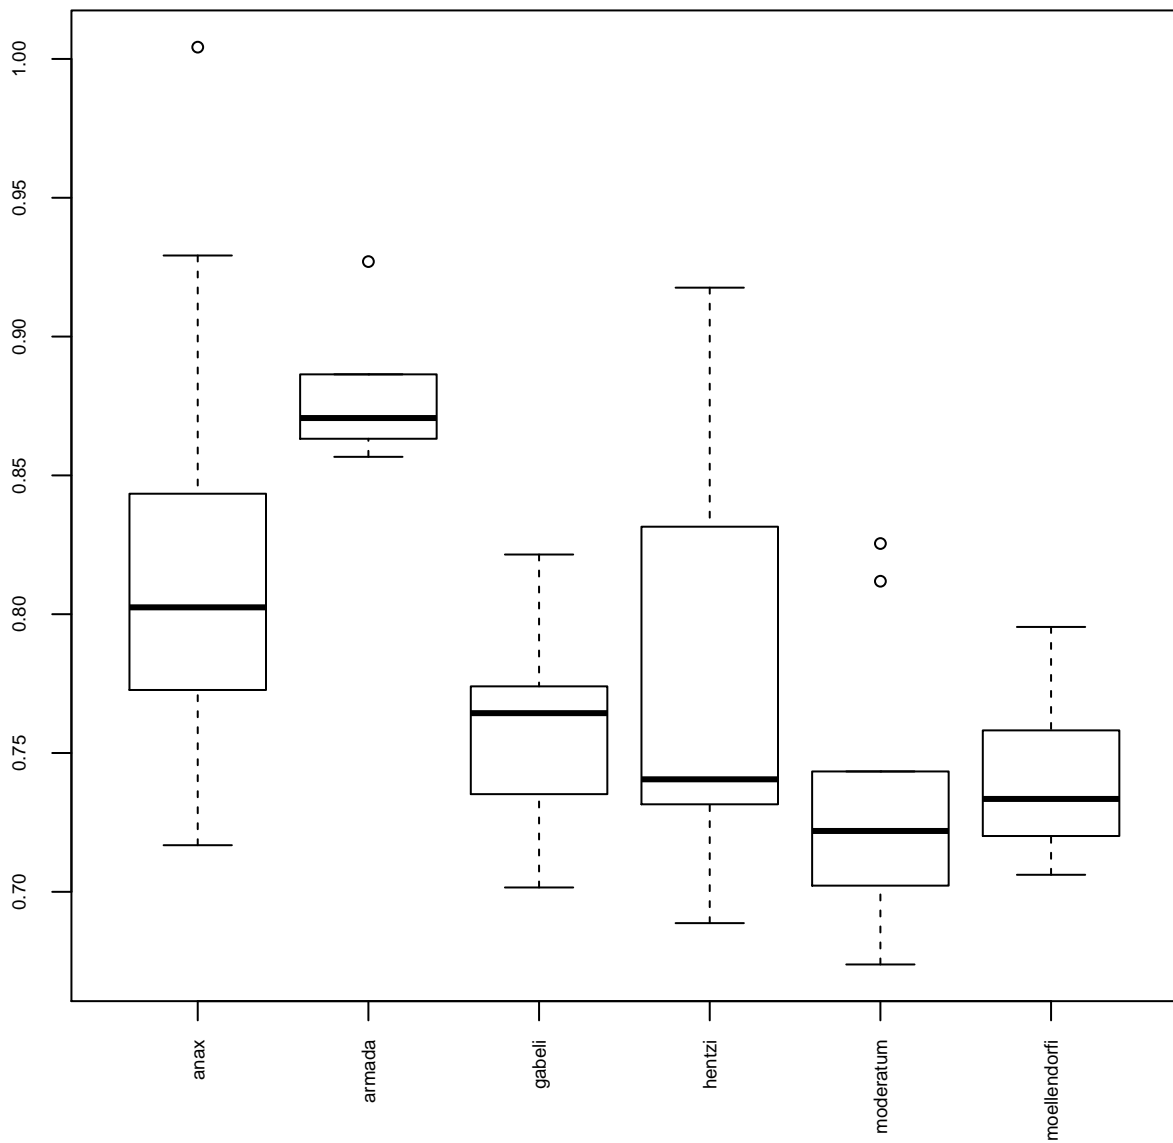

Supplement: Supplementary file 185

## Leg 4 Scopulation ratio – females

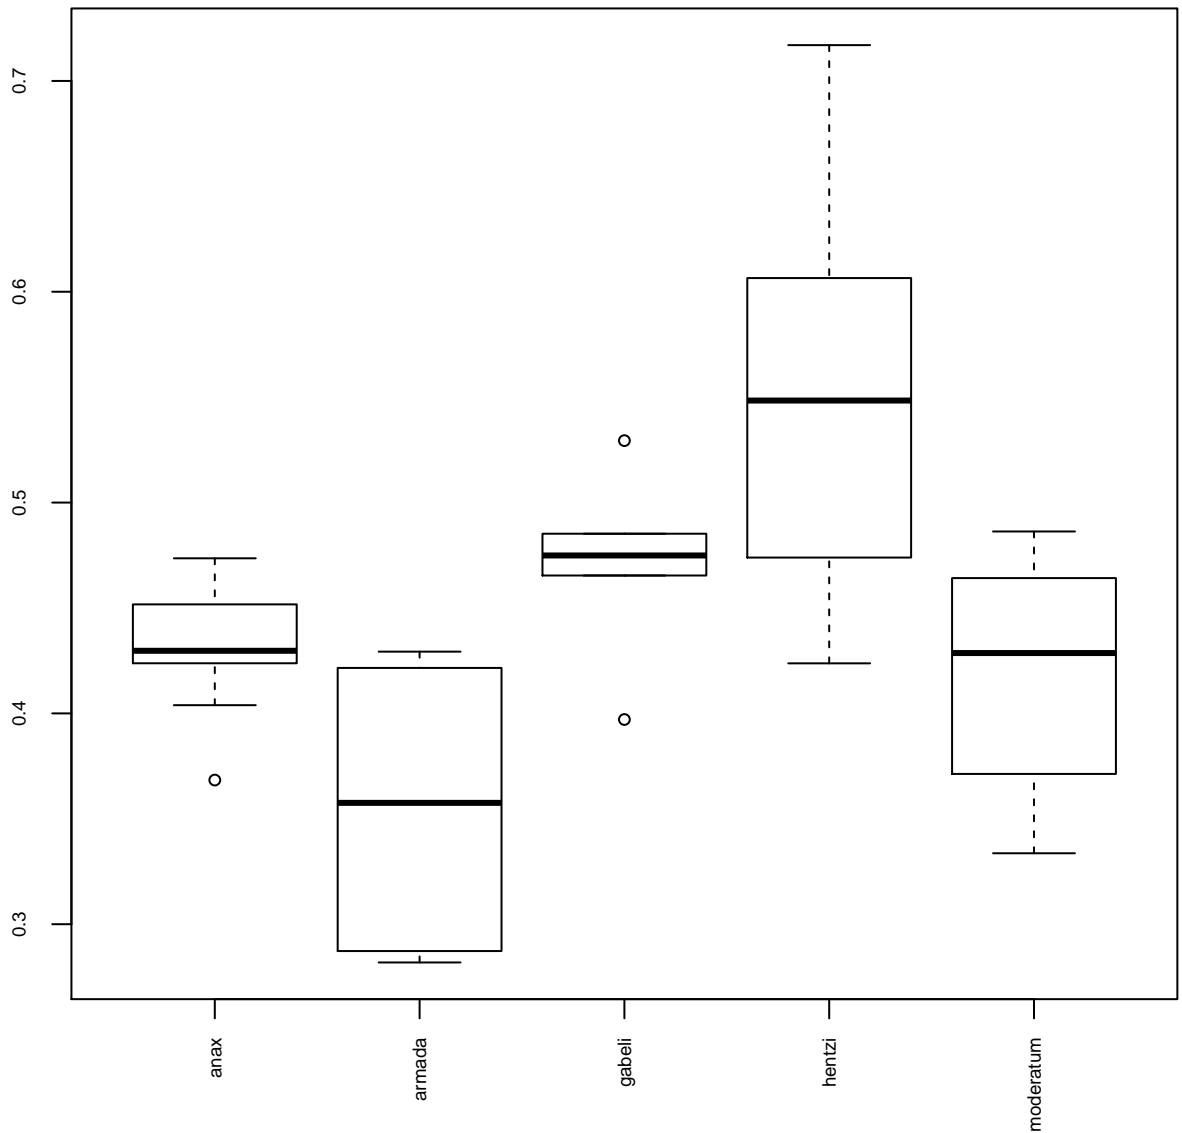

Supplement: Supplementary file 186

# Femur 1 Length/Width ratio – females

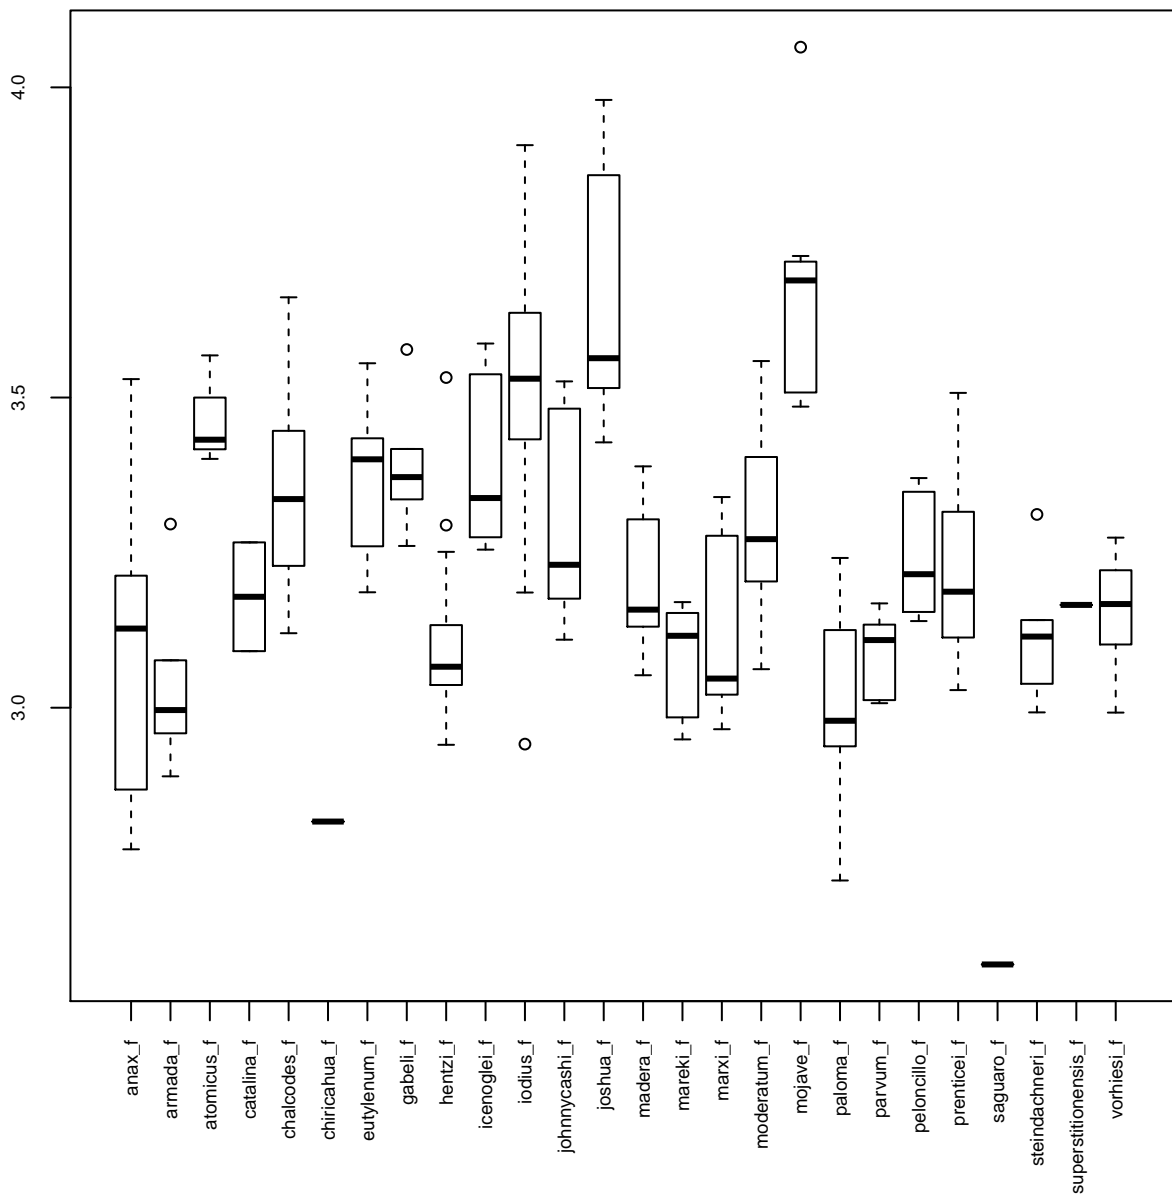

Supplement: Supplementary file 187

## Femur 1/Patella 3 ratio – males

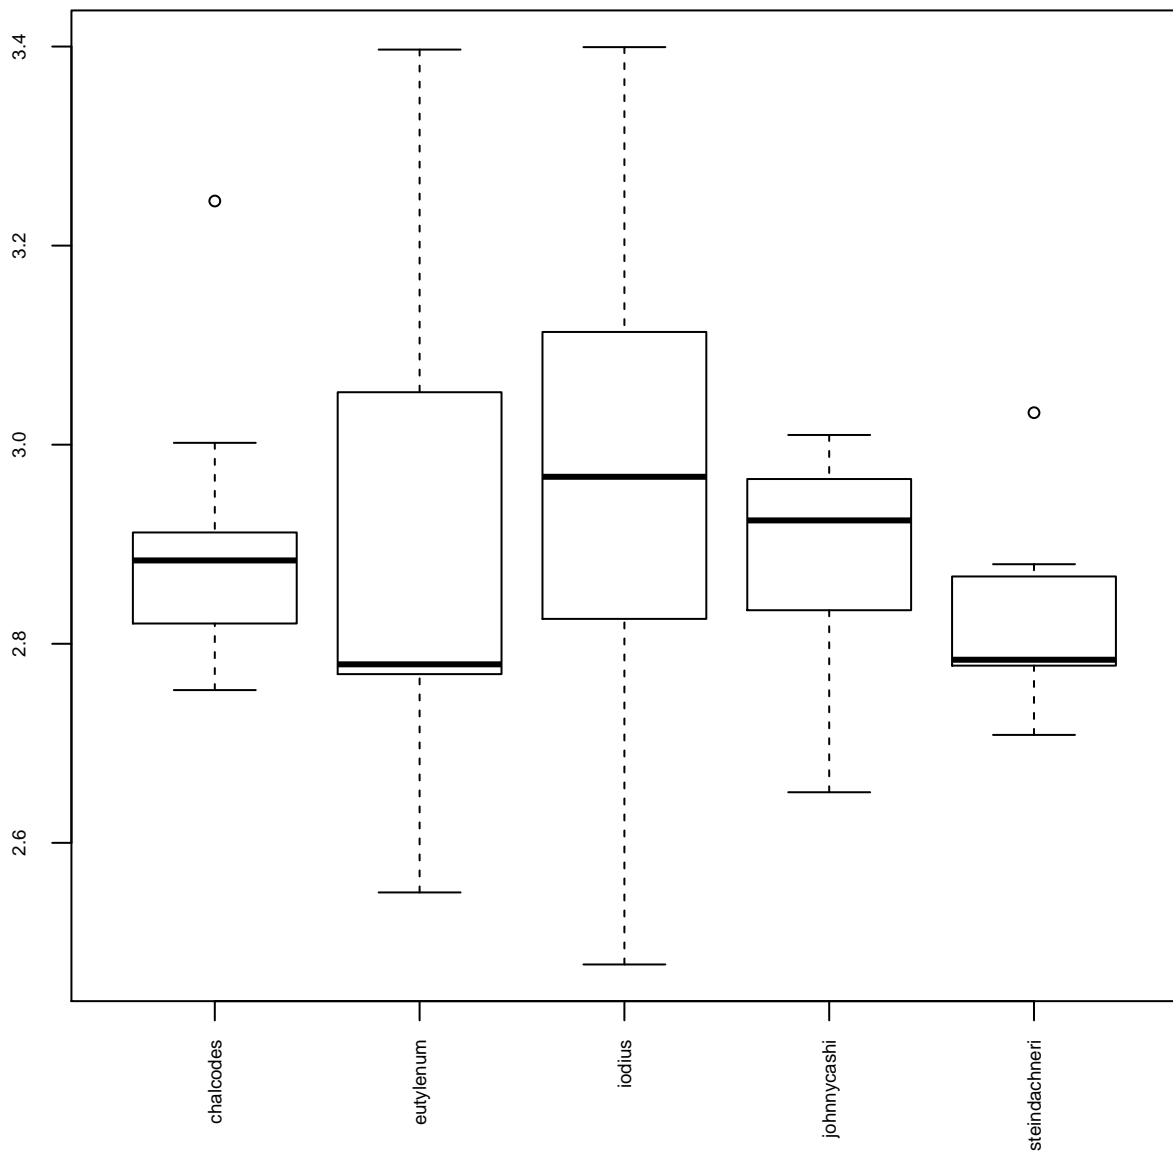

Supplement: Supplementary file 188

## Tibia 3/Femur 4 Length ratio – males

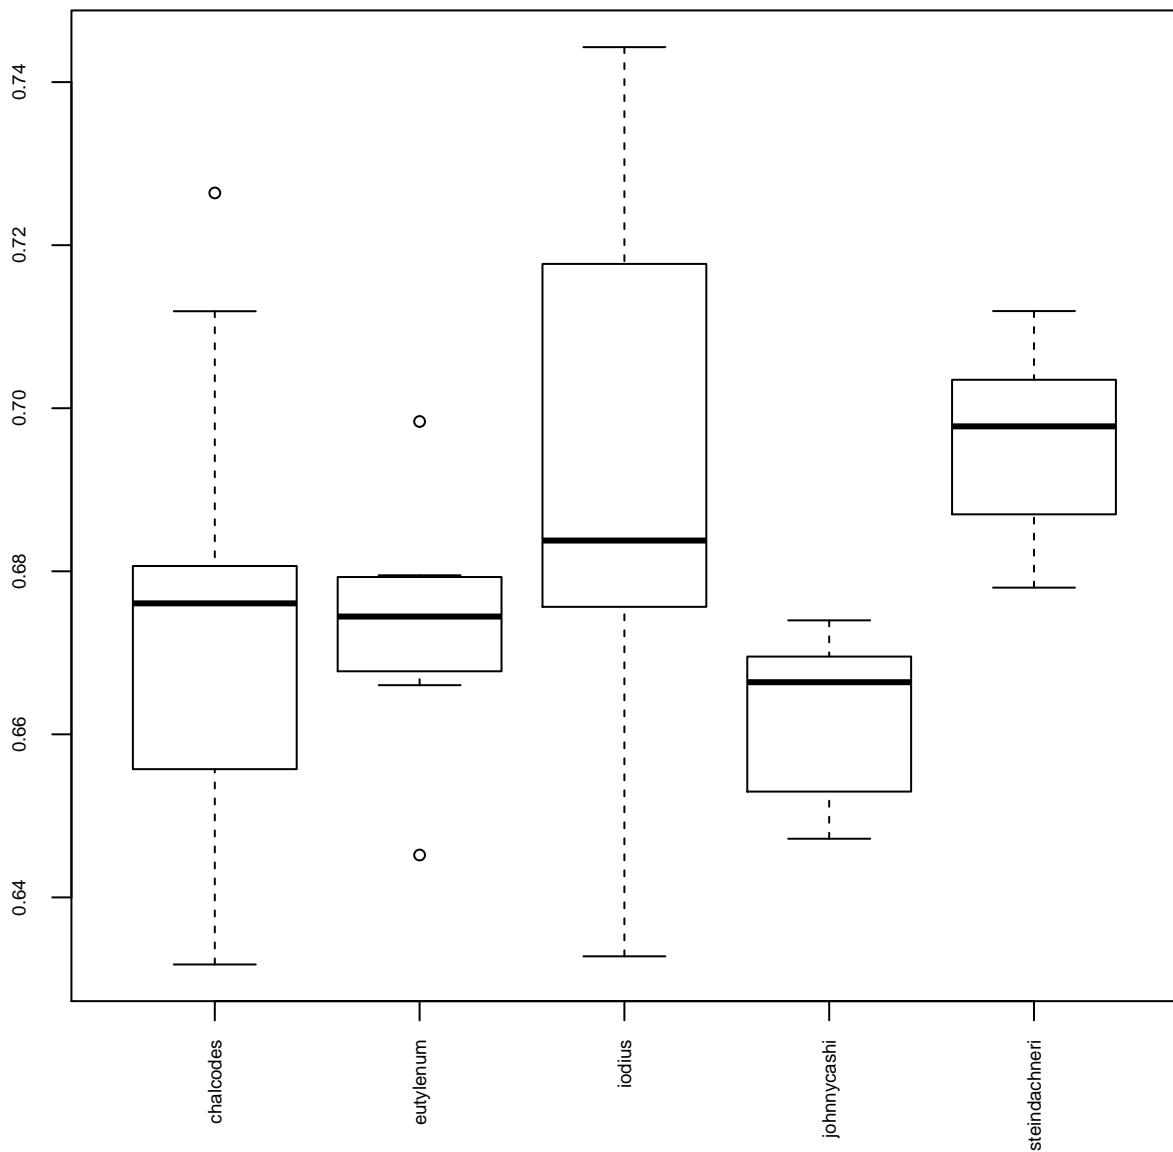

Supplement: Supplementary file 189

## Metatarsus 3/Tarsus 3 ratio – females

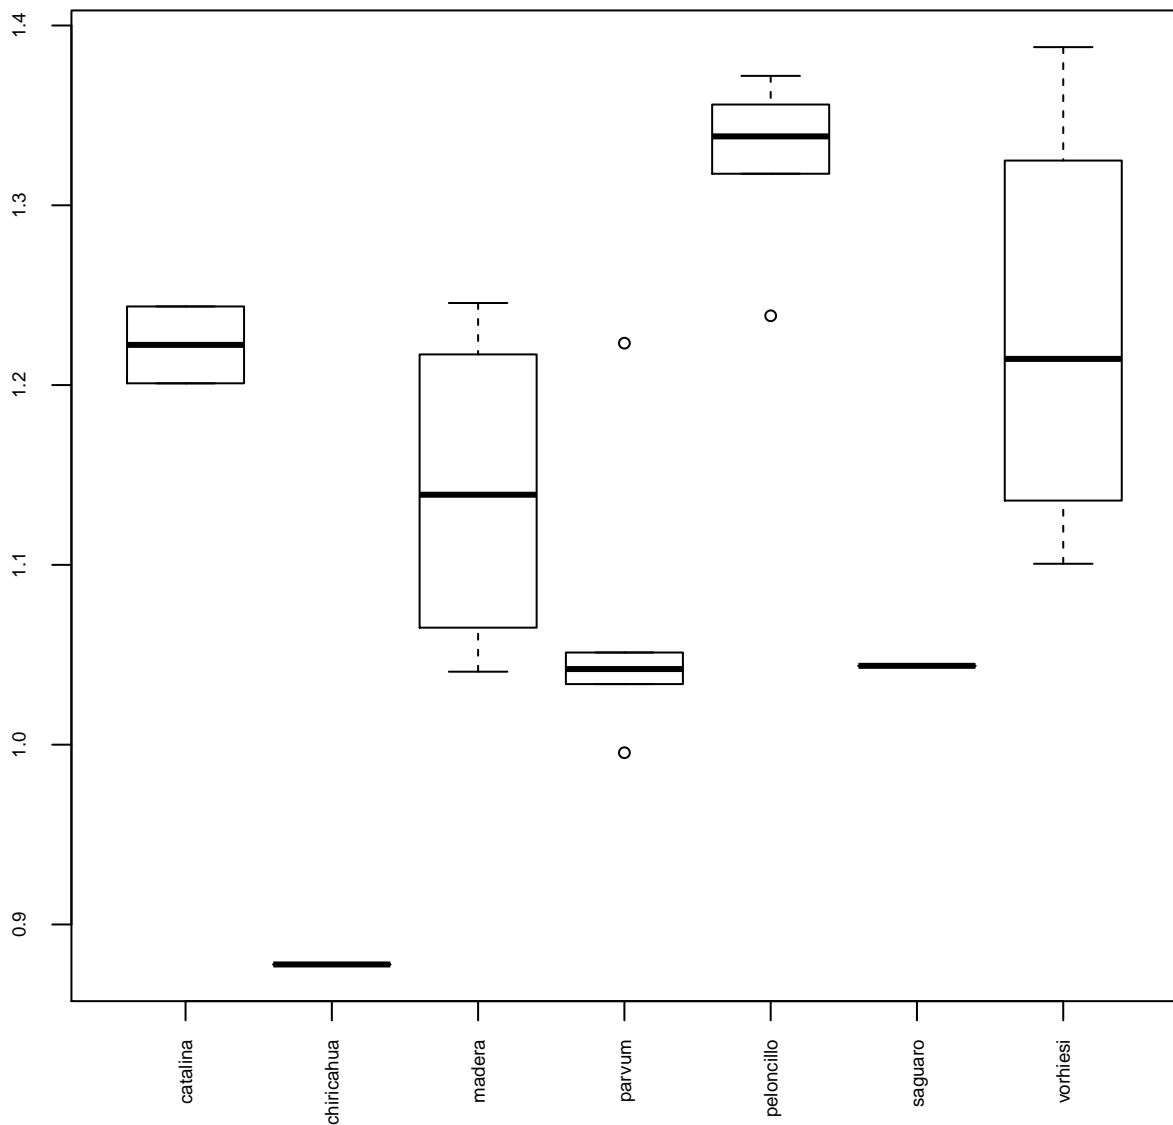

Supplement: Supplementary file 190

## Carapace Length/Patella 1 ratio – females

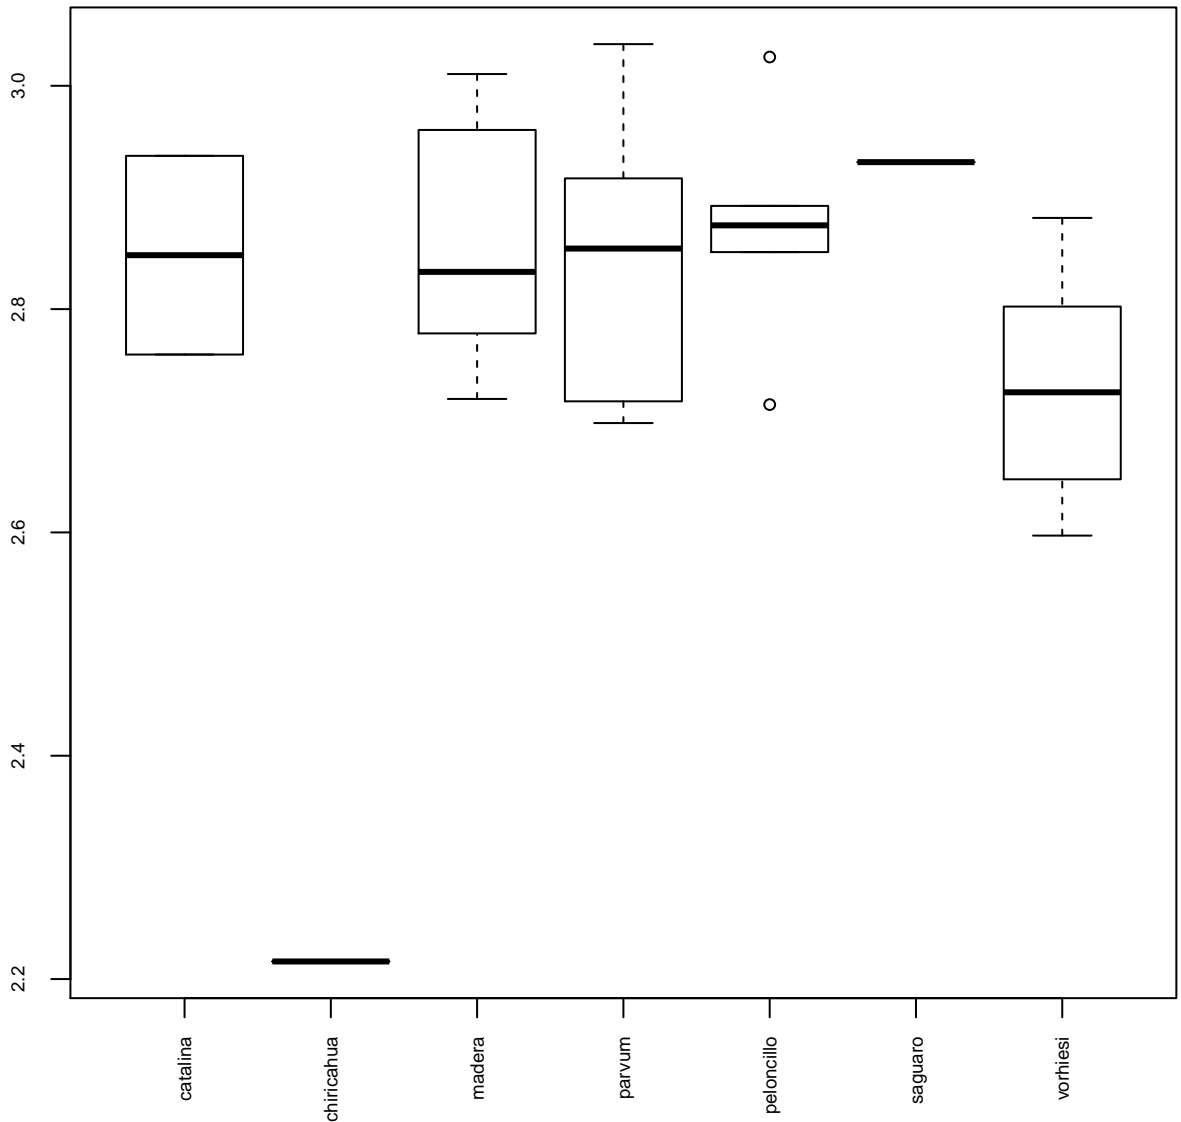

Supplement: Supplementary file 191

# Patella 1/Tibia 4 Length ratio – males

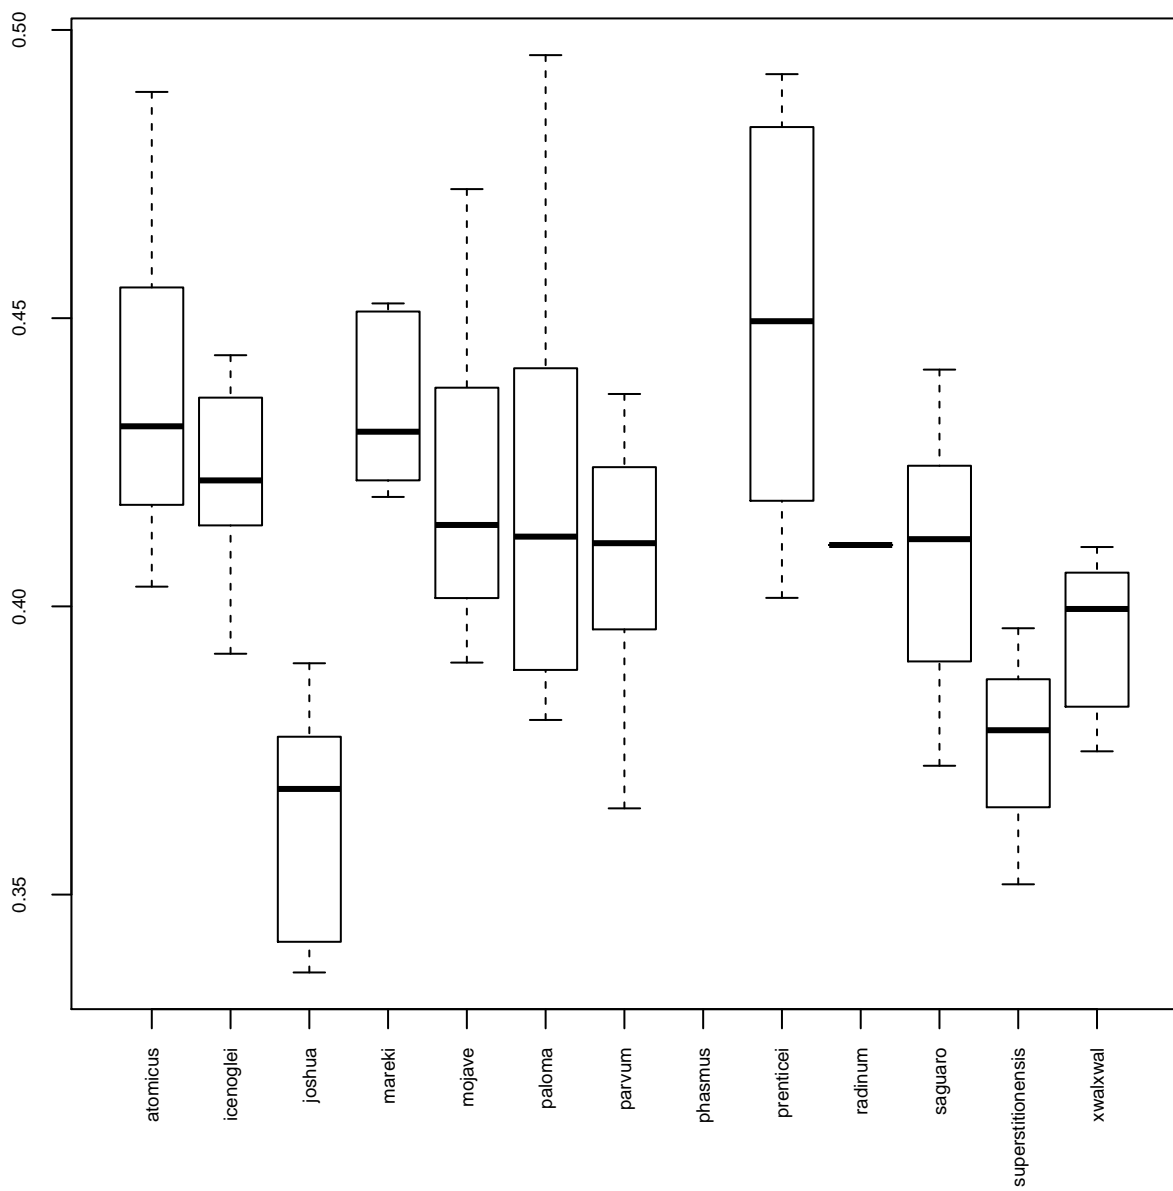

Supplement: Supplementary file 192

## Patella 1/Metatarsus 3 Length ratio – females

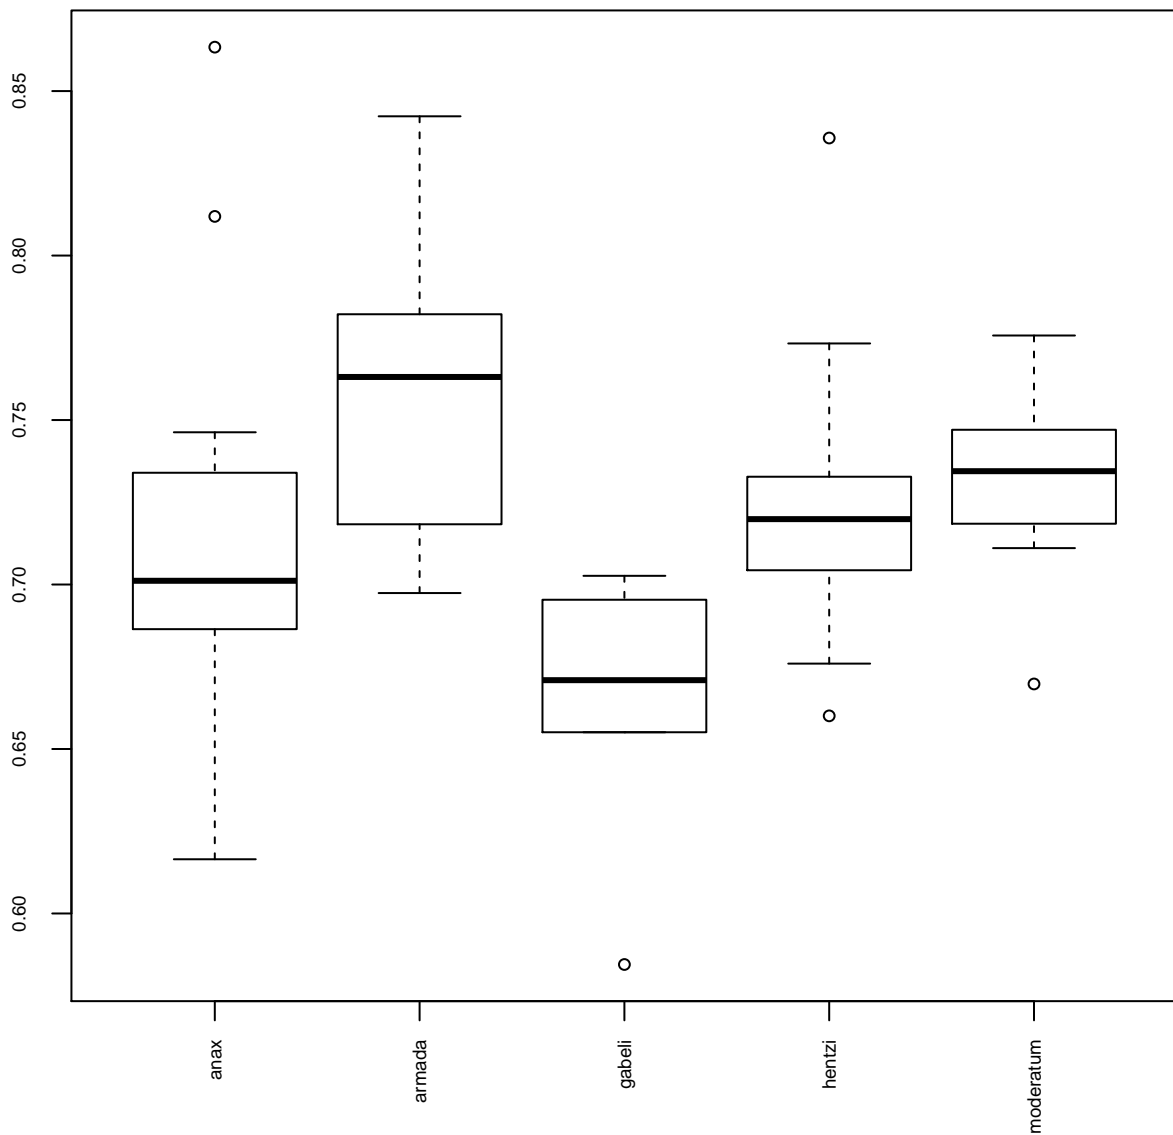

Supplement: Supplementary file 193

# Metatarsus 3/Femur 4 Length ratio – males

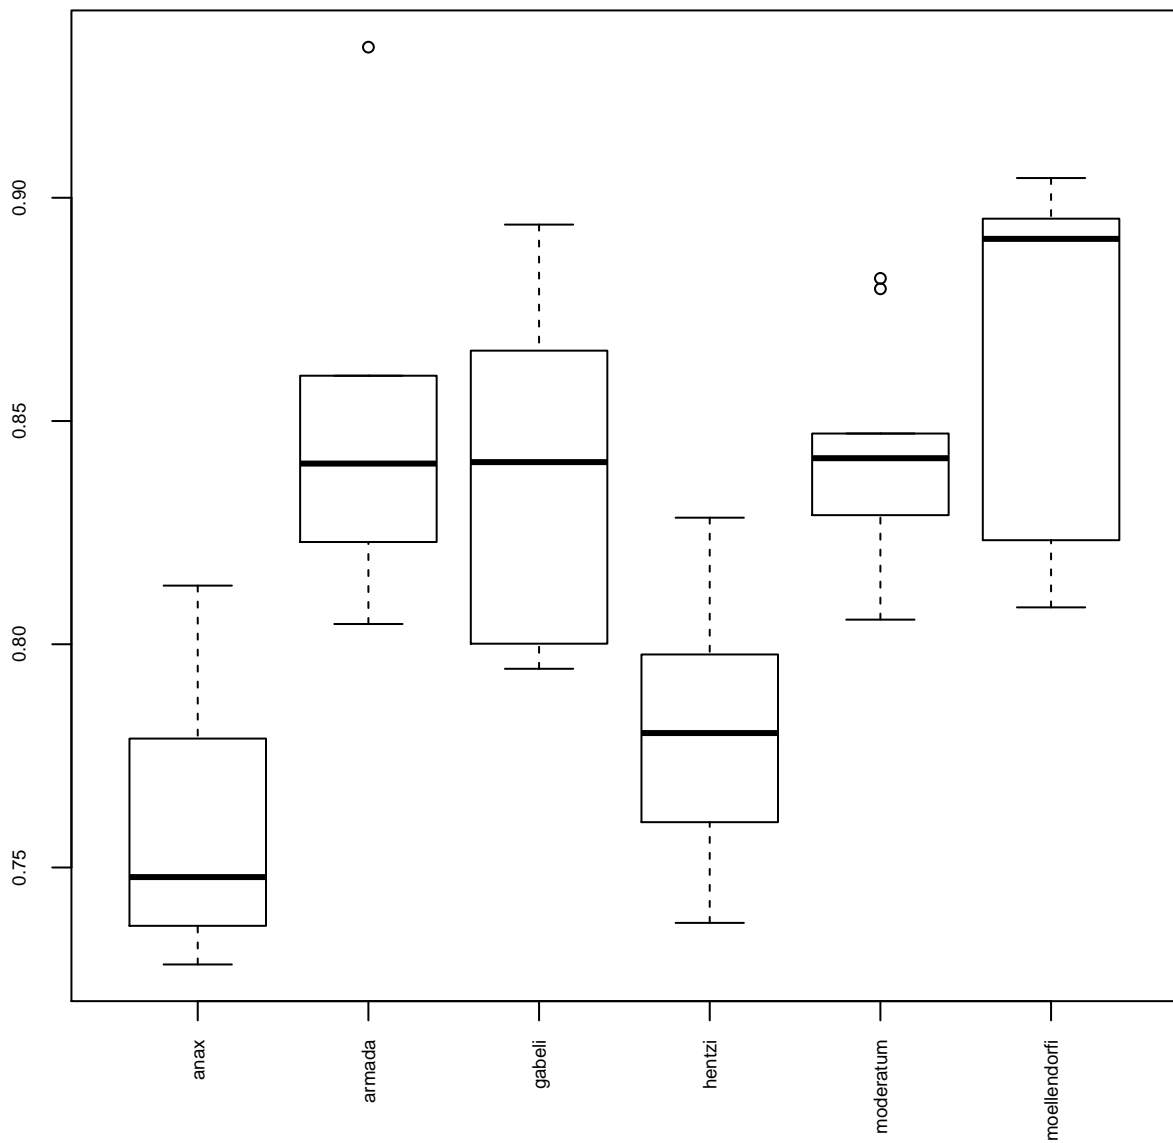

Supplement: Supplementary file 194

## Femur 1/Patella 1 ratio – females

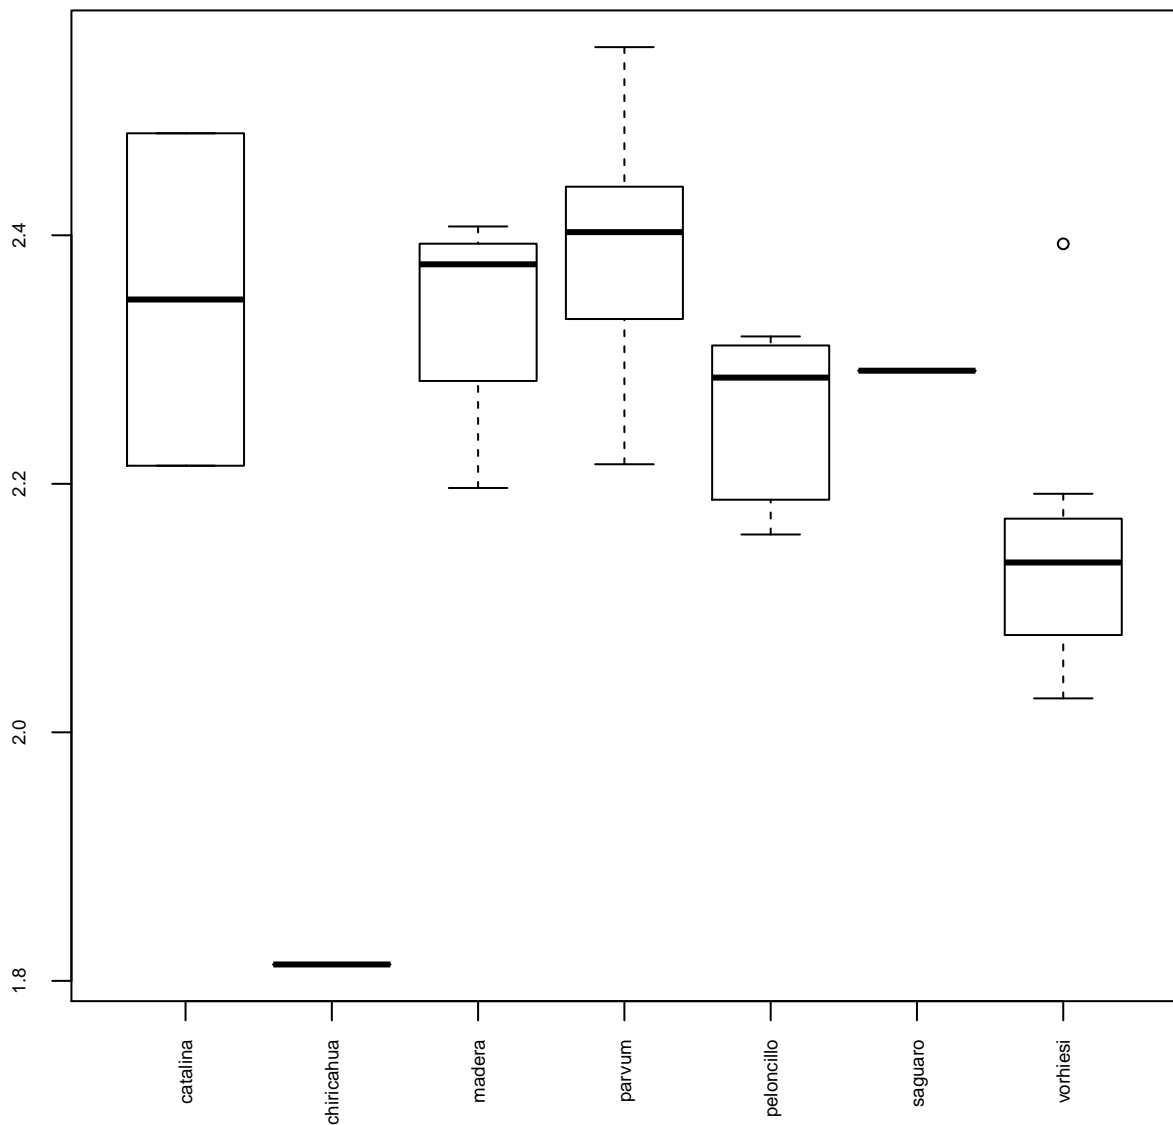

Supplement: Supplementary file 195

# Carapace Length/Palpal Tibia Length ratio – males

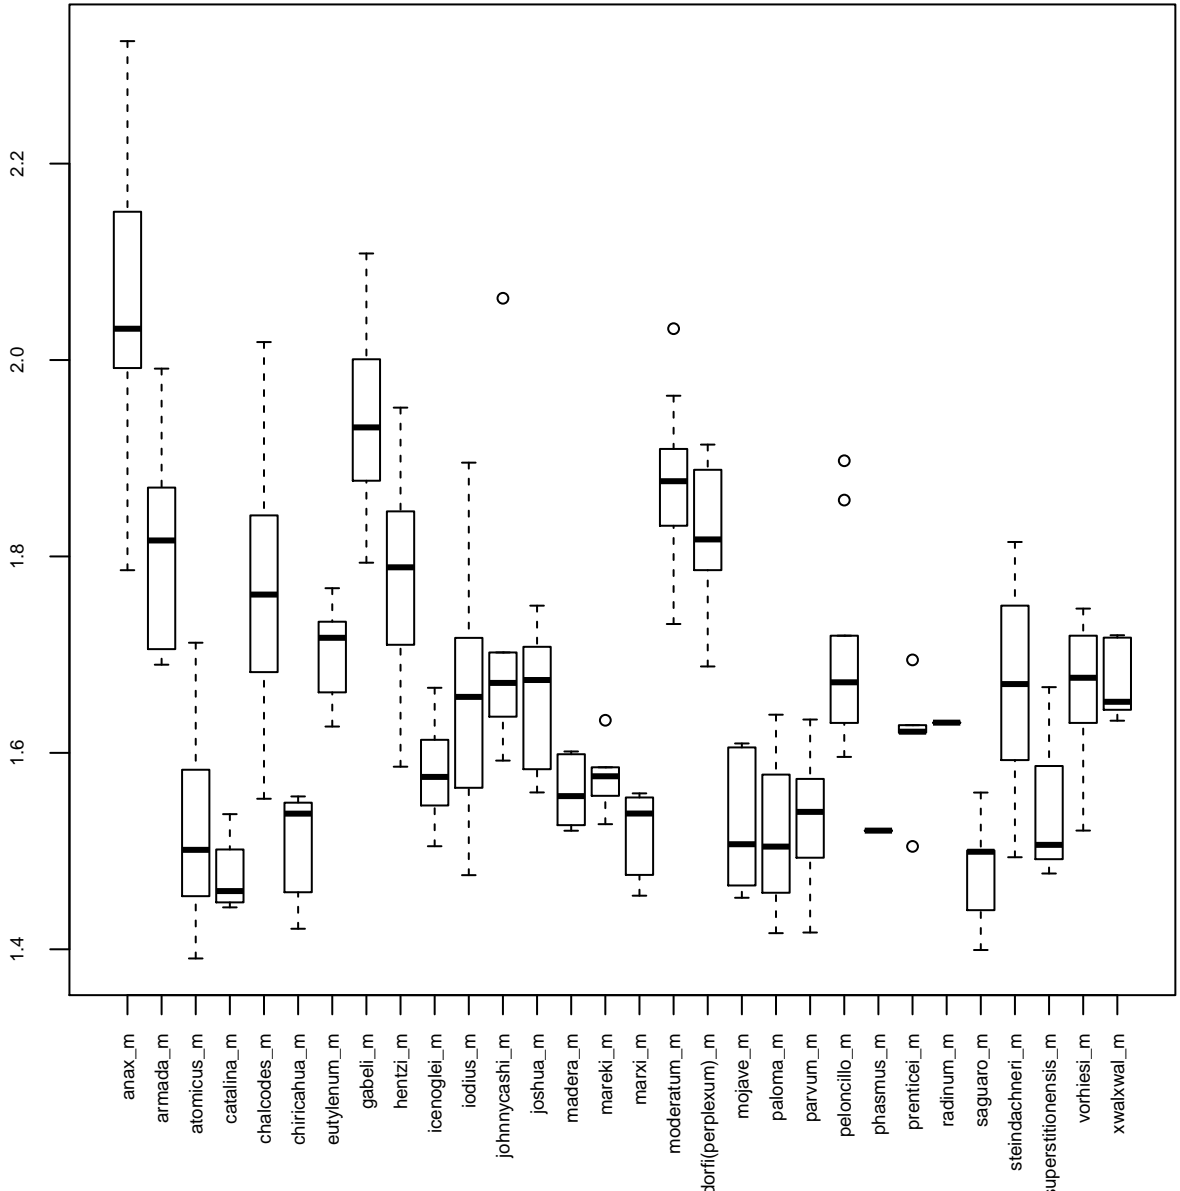

Supplement: Supplementary file 196

## Carapace Length/Tarsus 1 ratio – males

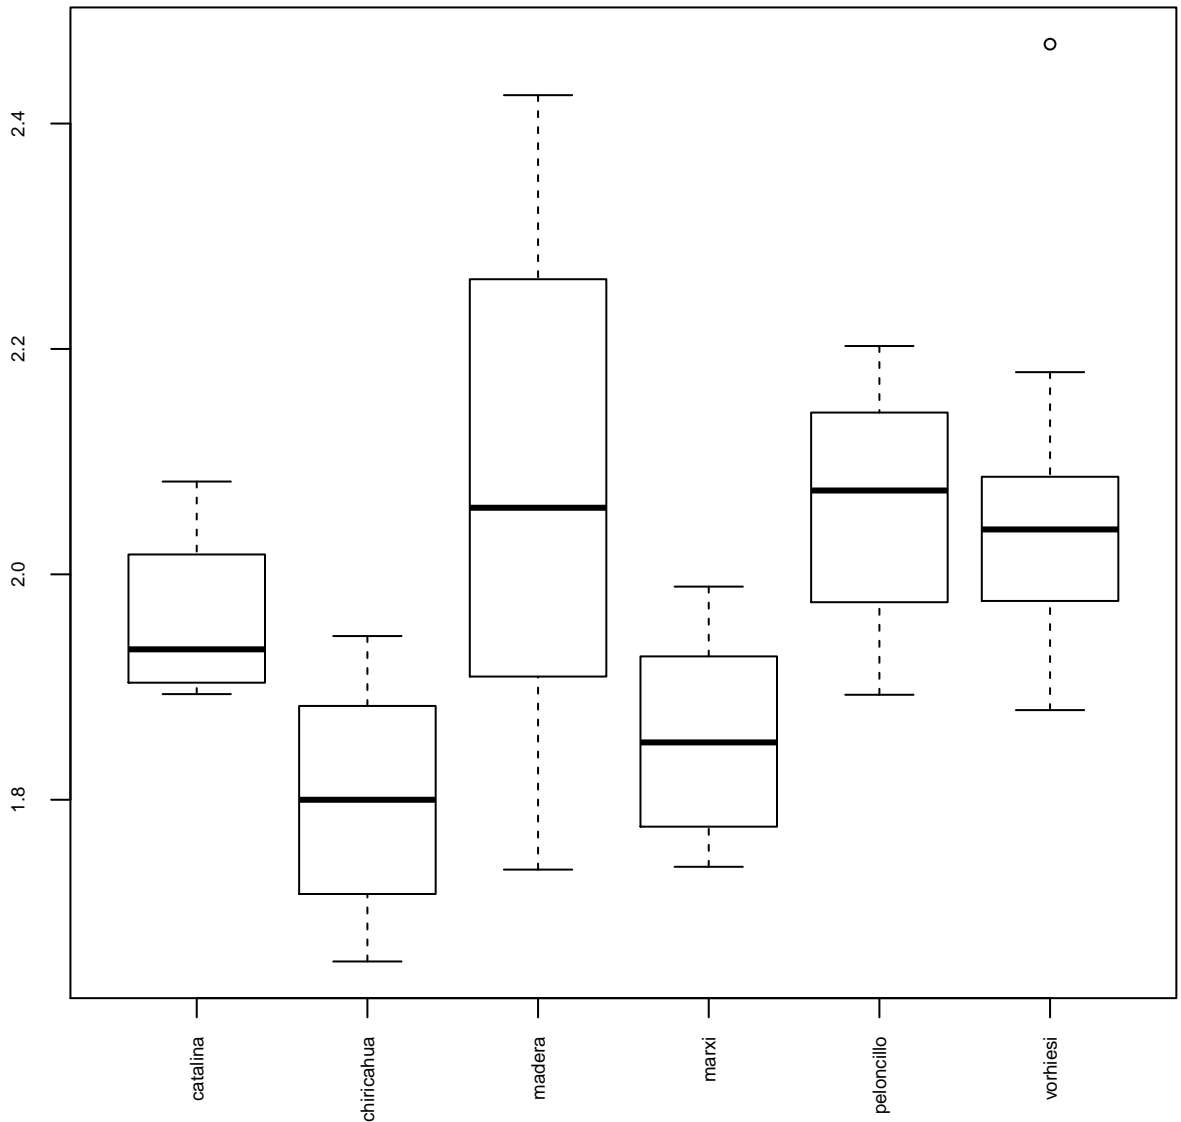

Supplement: Supplementary file 197

## Patella 3/Femur 4 Length ratio – females

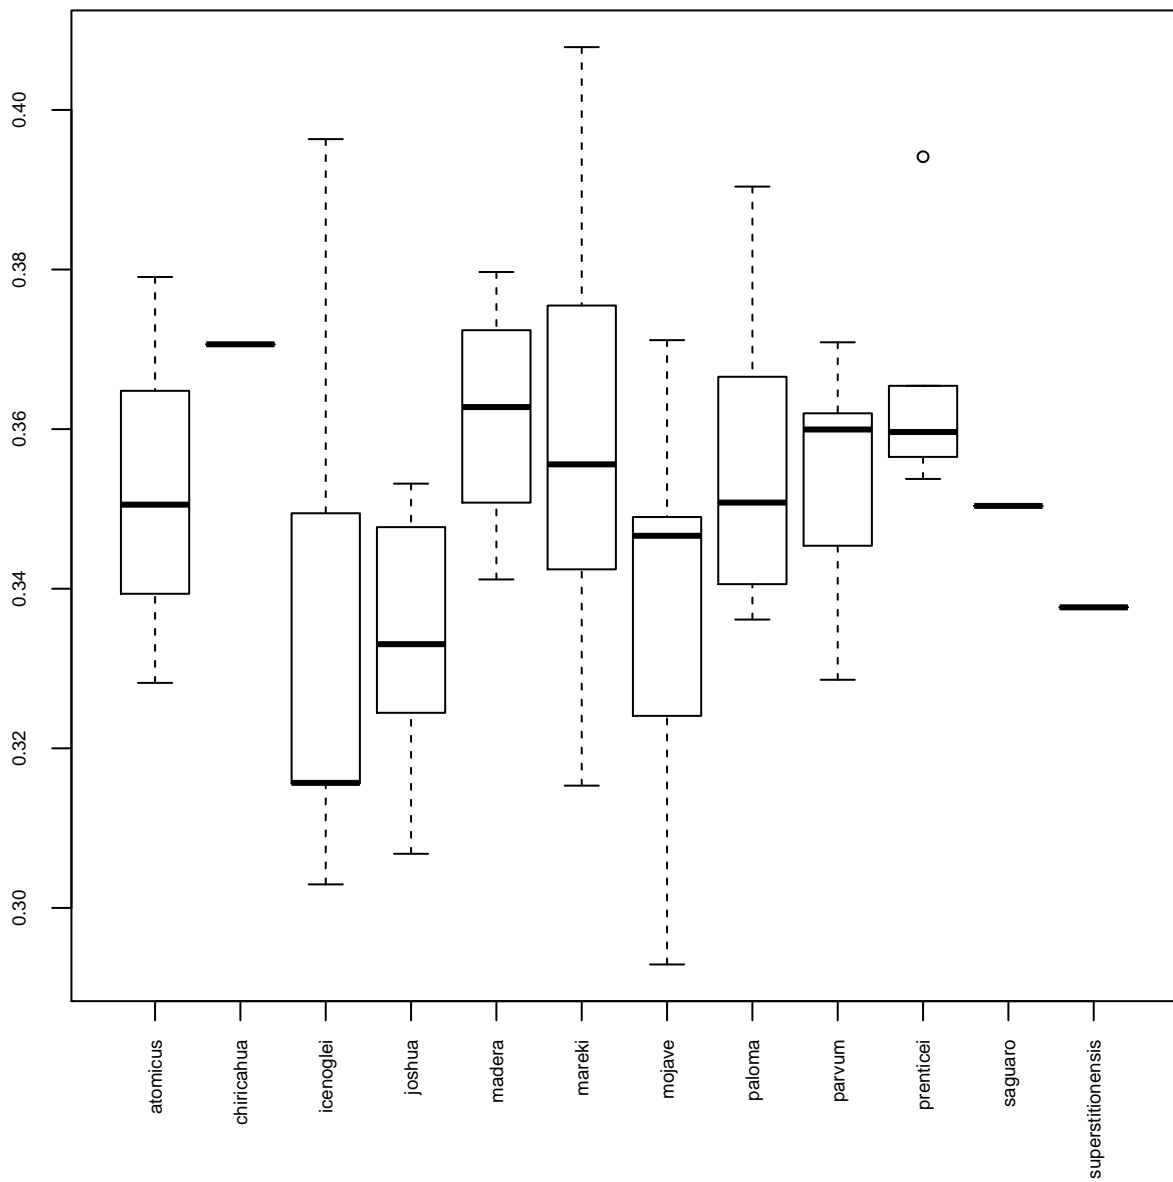

Supplement: Supplementary file 198

# Tibia 1/Tibia 4 ratio – males

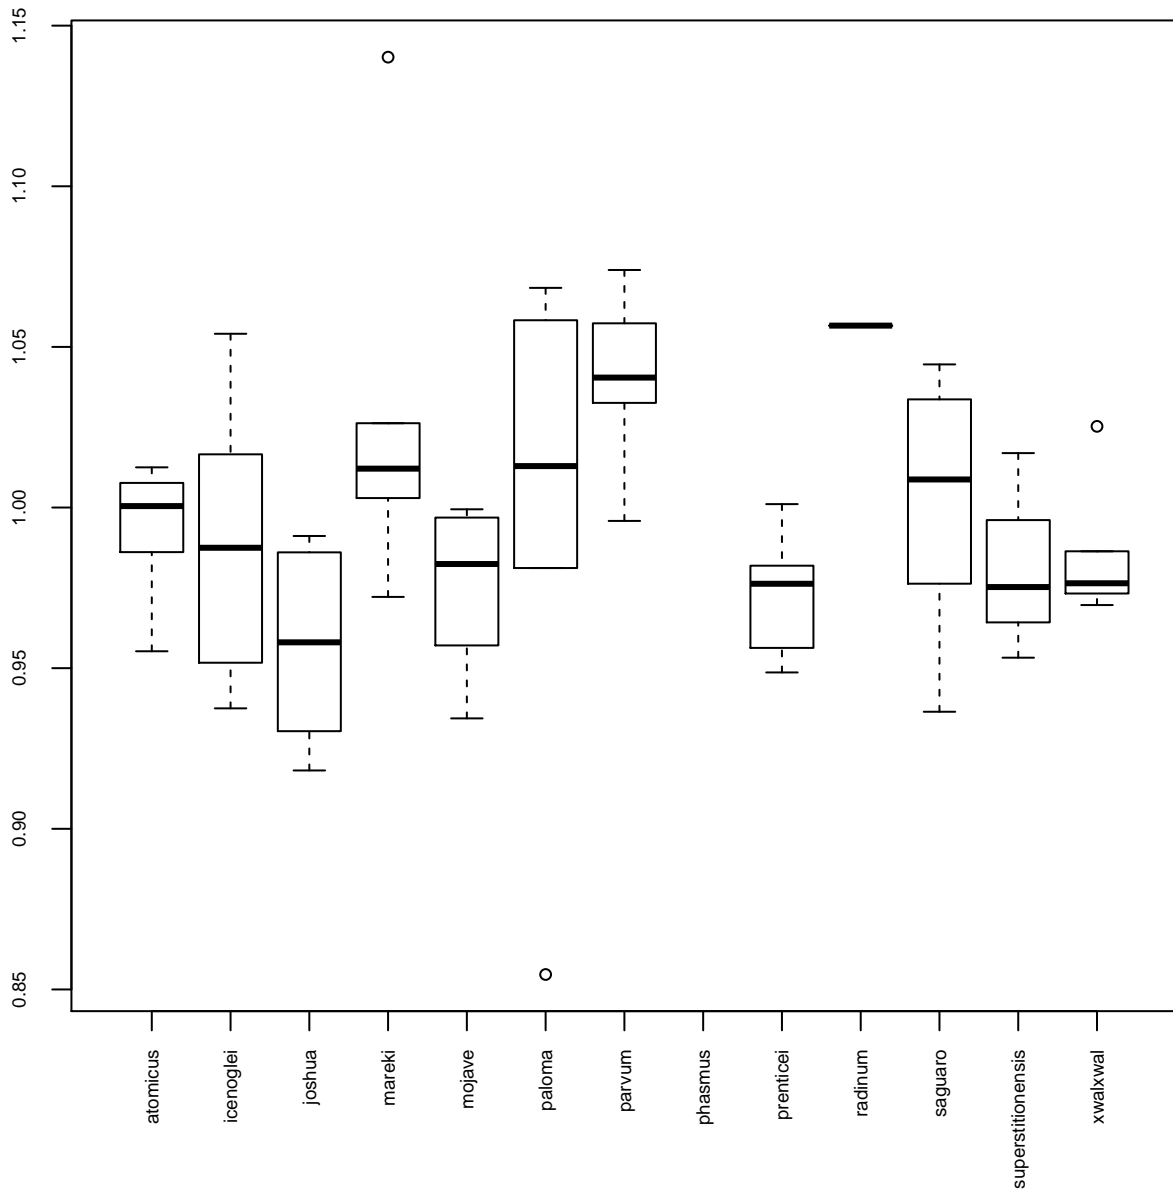

Supplement: Supplementary file 199

## Tibia 3/Tarsus 3 ratio – females

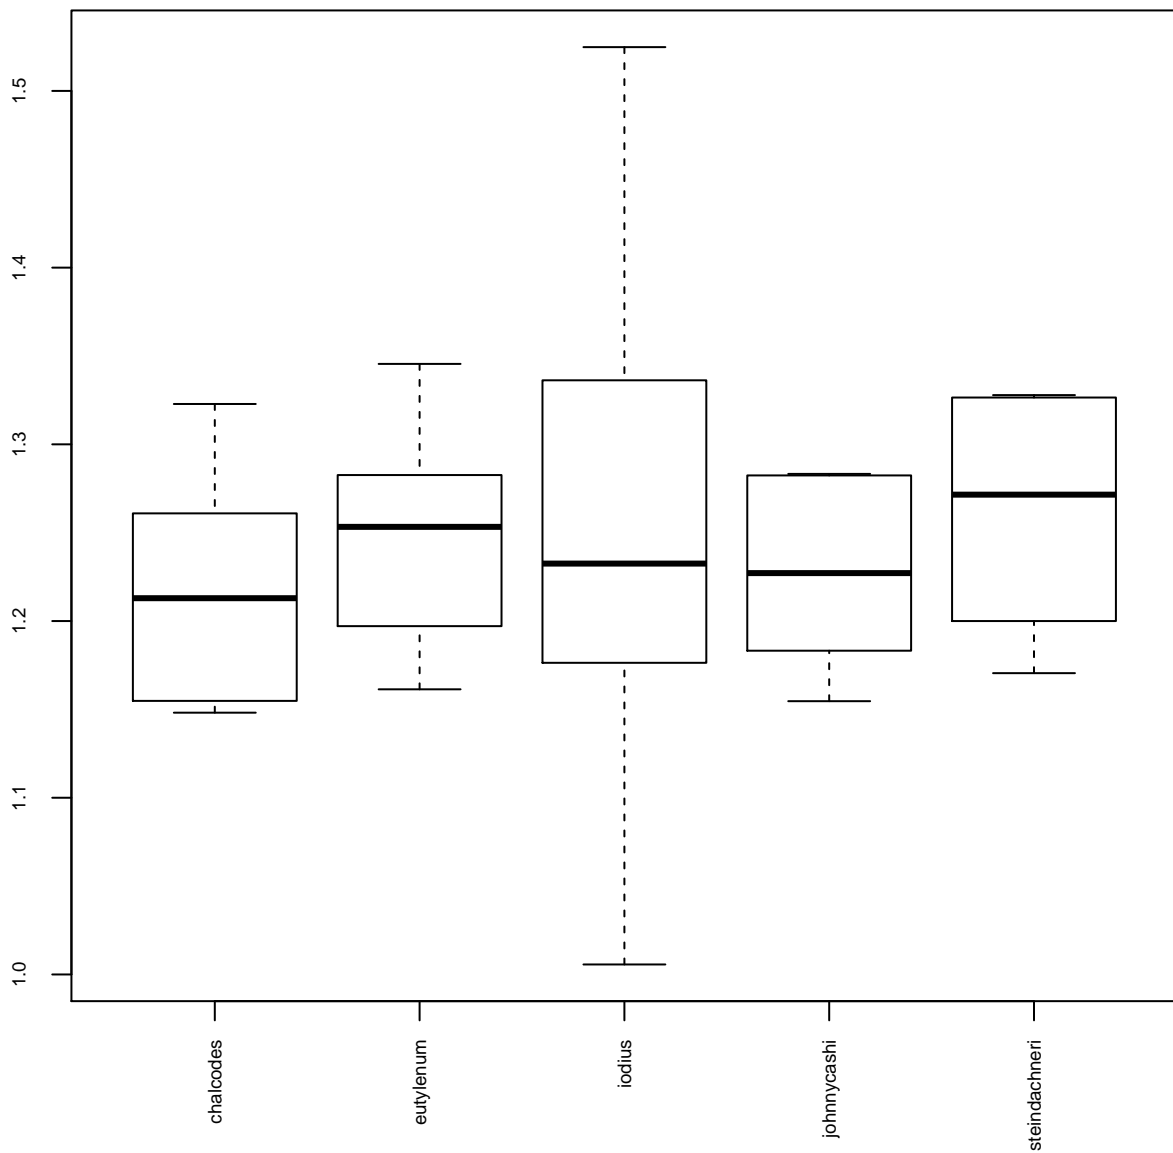

Supplement: Supplementary file 200
