# Supplementary material (part 3 of 15)
Source: publisher site journal article supplement (http://zookeys.pensoft.net/article/6264/download/suppl/32/)

Patella 4/Tarsus 4 ratio – males

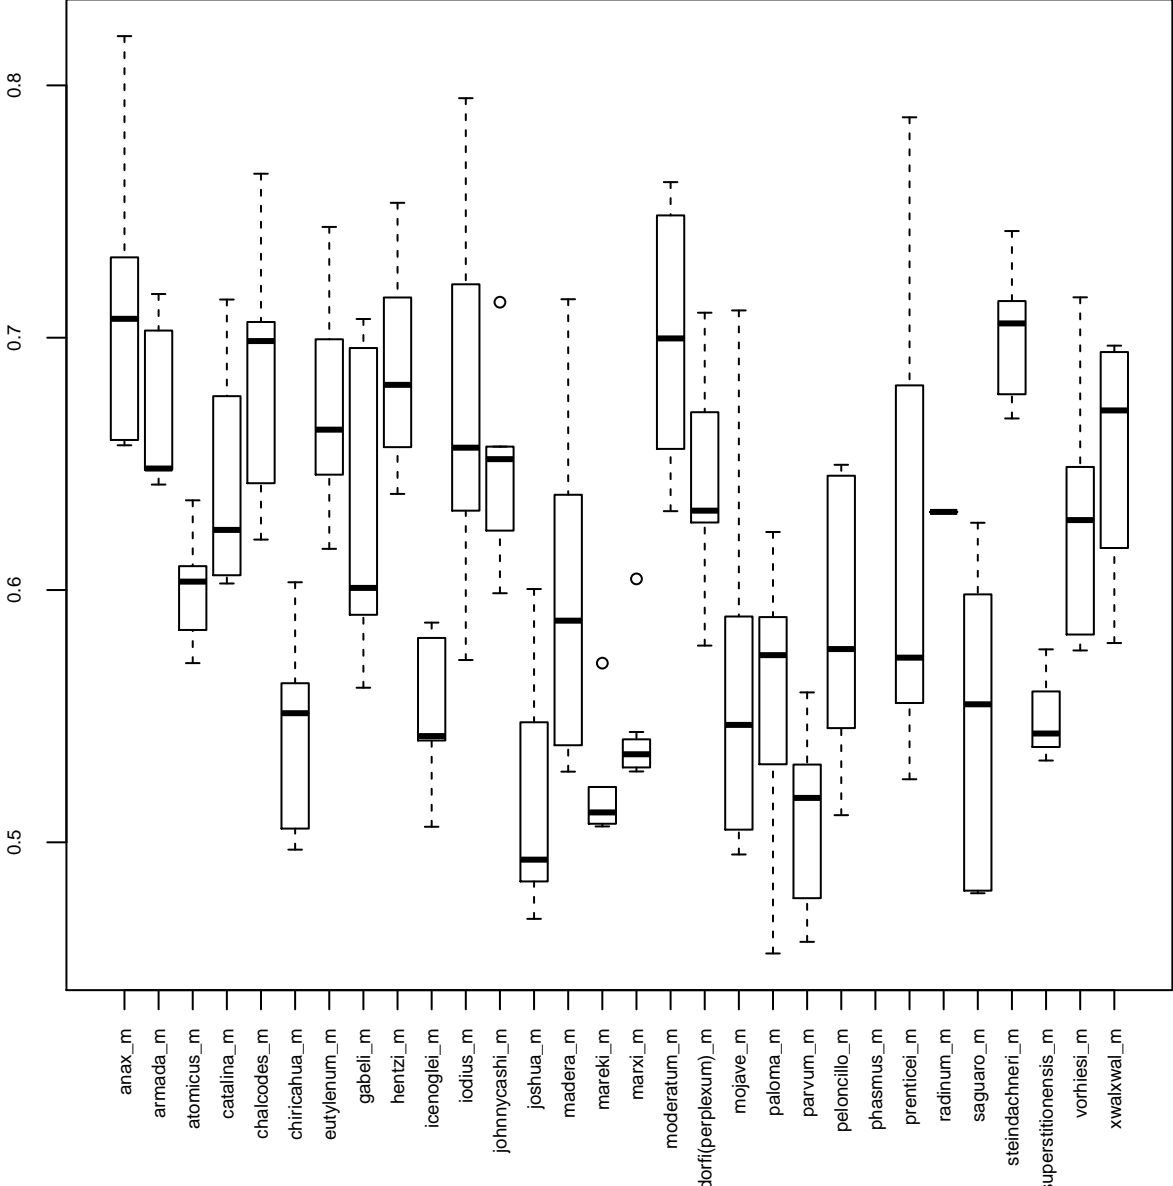

Supplement: Supplementary file 201

## Tibia 1/Metatarsus 3 Length ratio – males

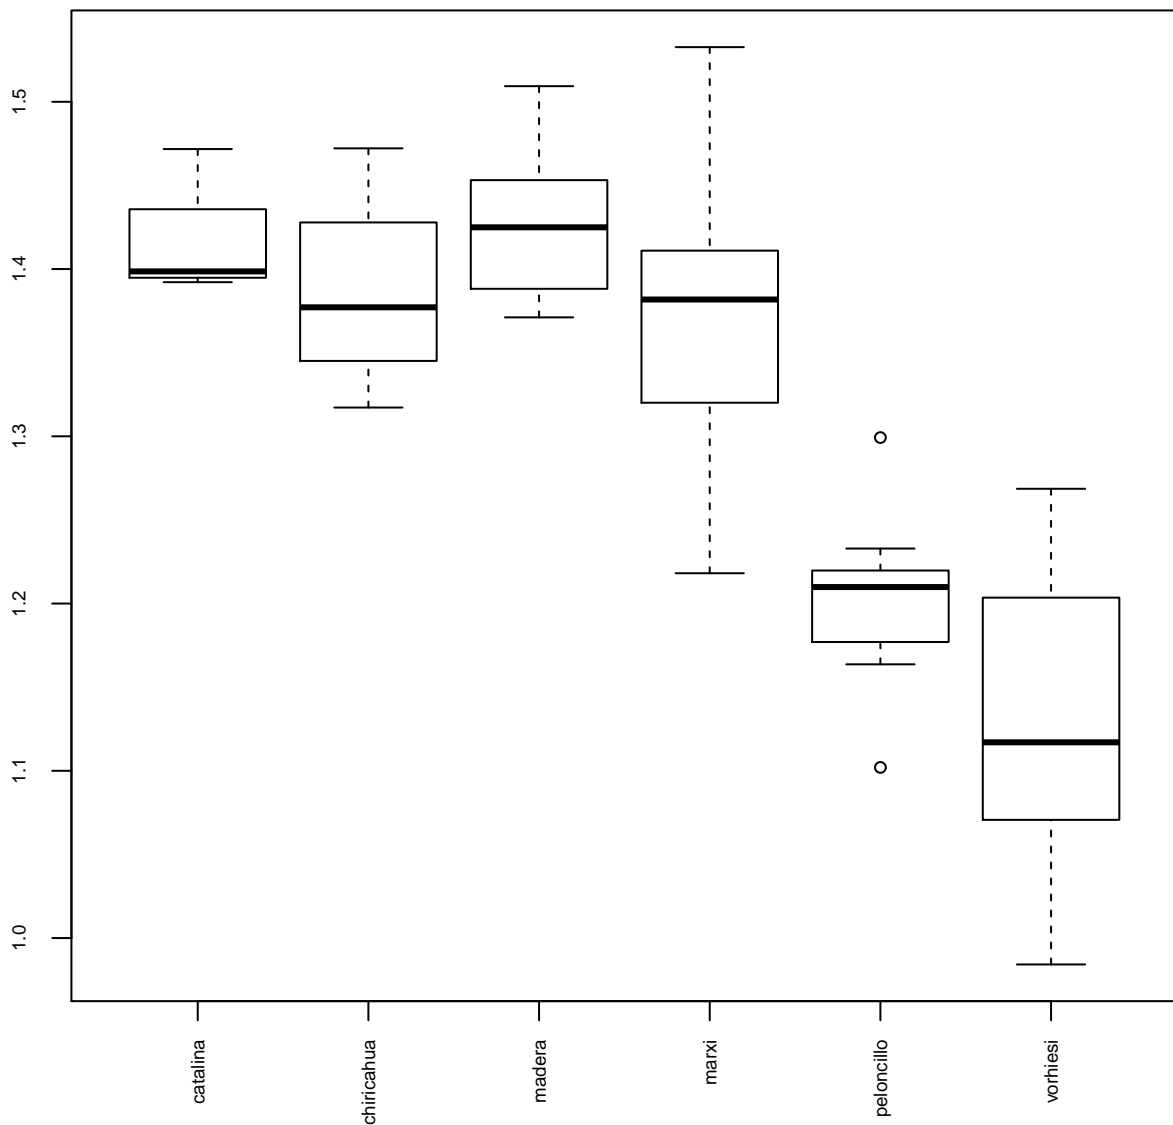

Supplement: Supplementary file 202

## Femur 1/Metatarsus 4 ratio – females

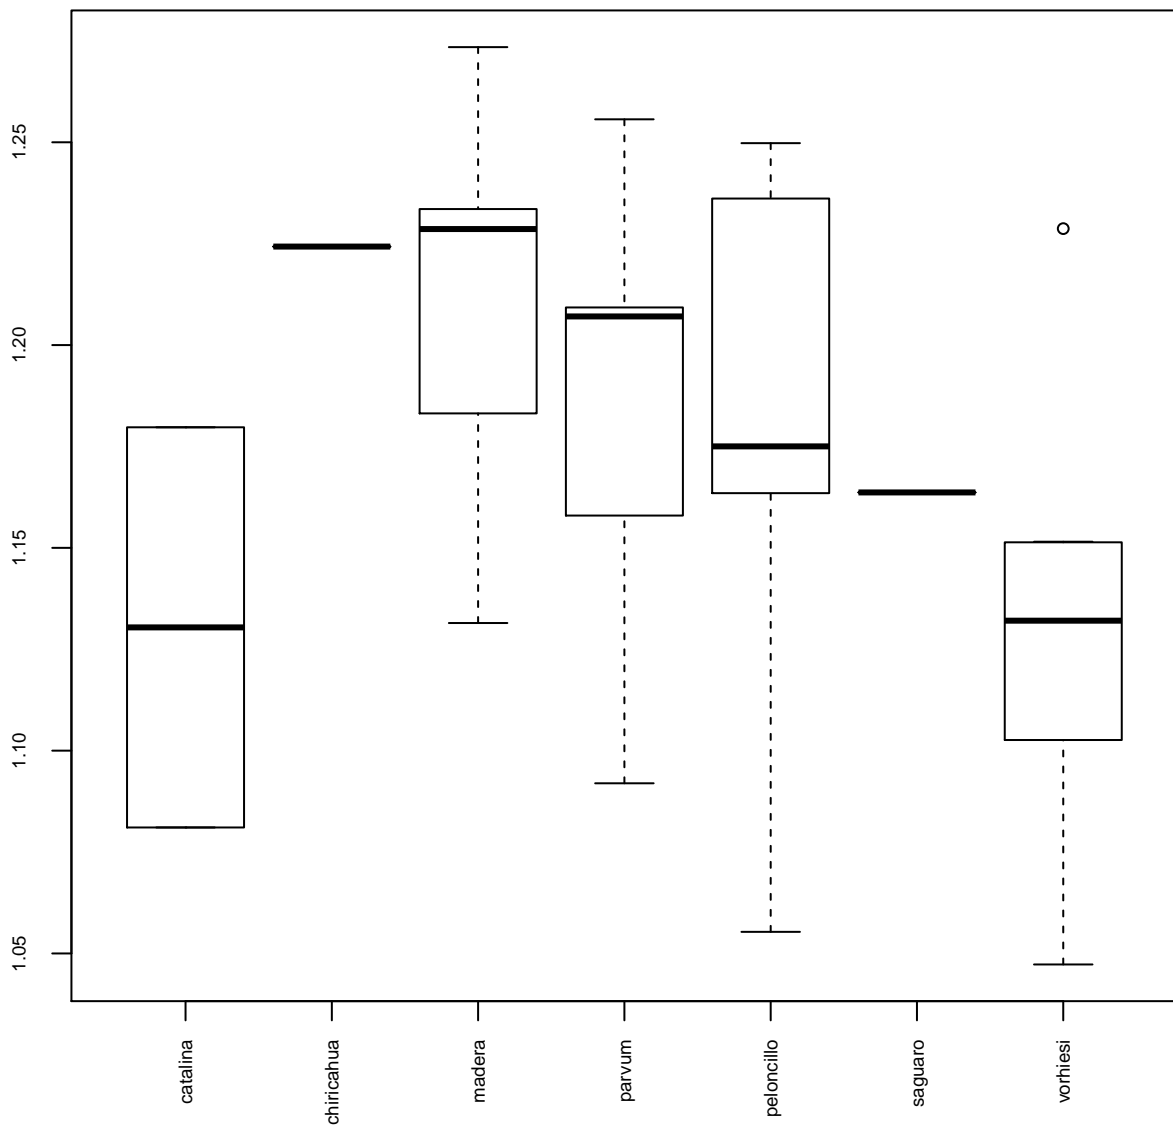

Supplement: Supplementary file 203

## Metatarsus 3/Femur 4 Length ratio – males

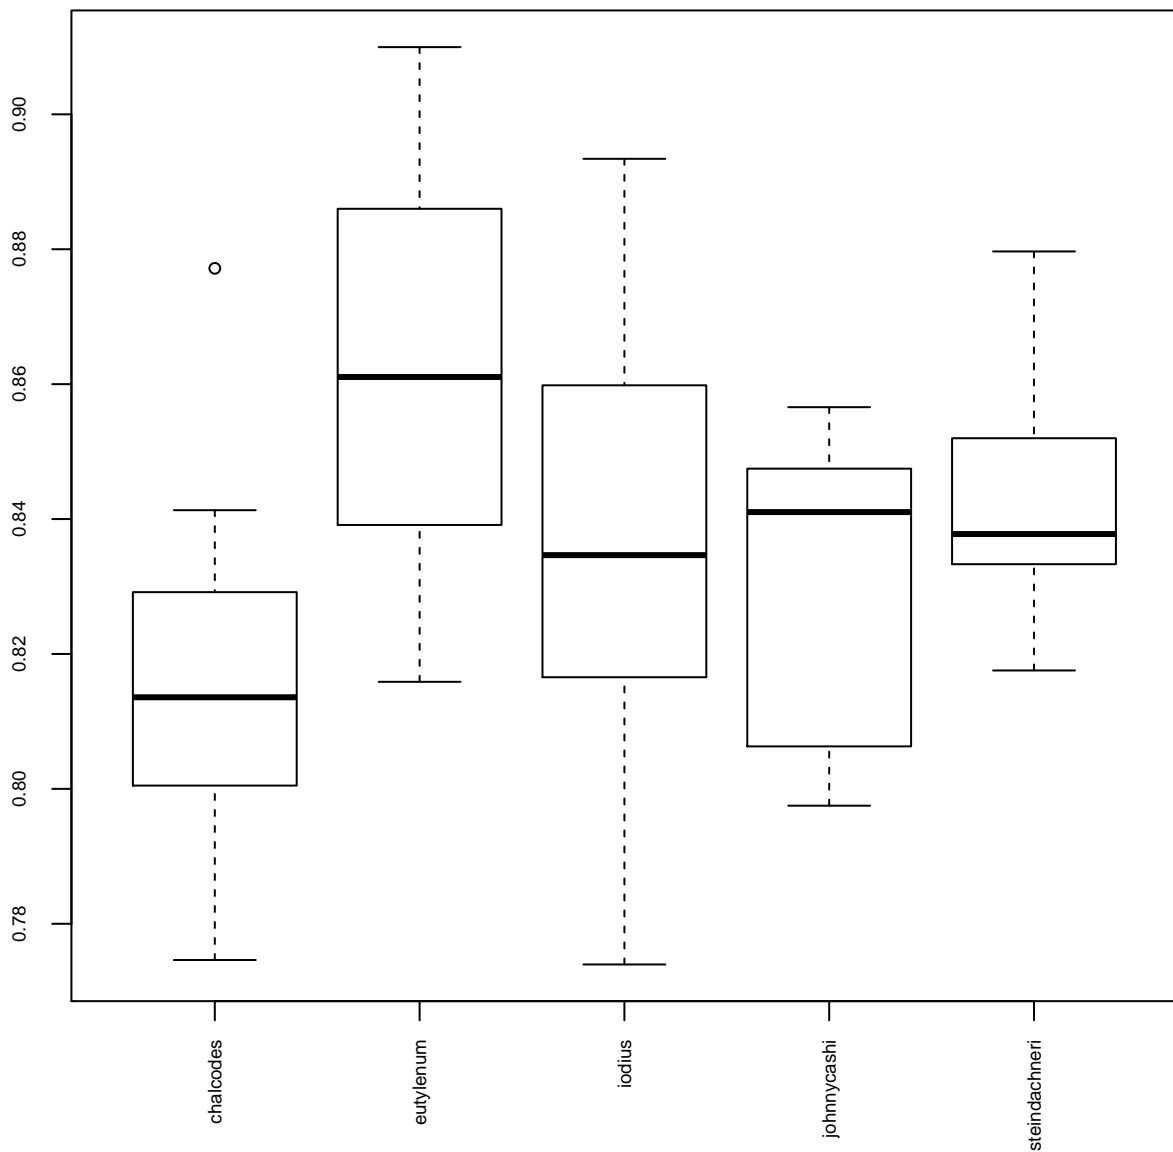

Supplement: Supplementary file 204

## Tibia 1/Tibia 4 ratio – females

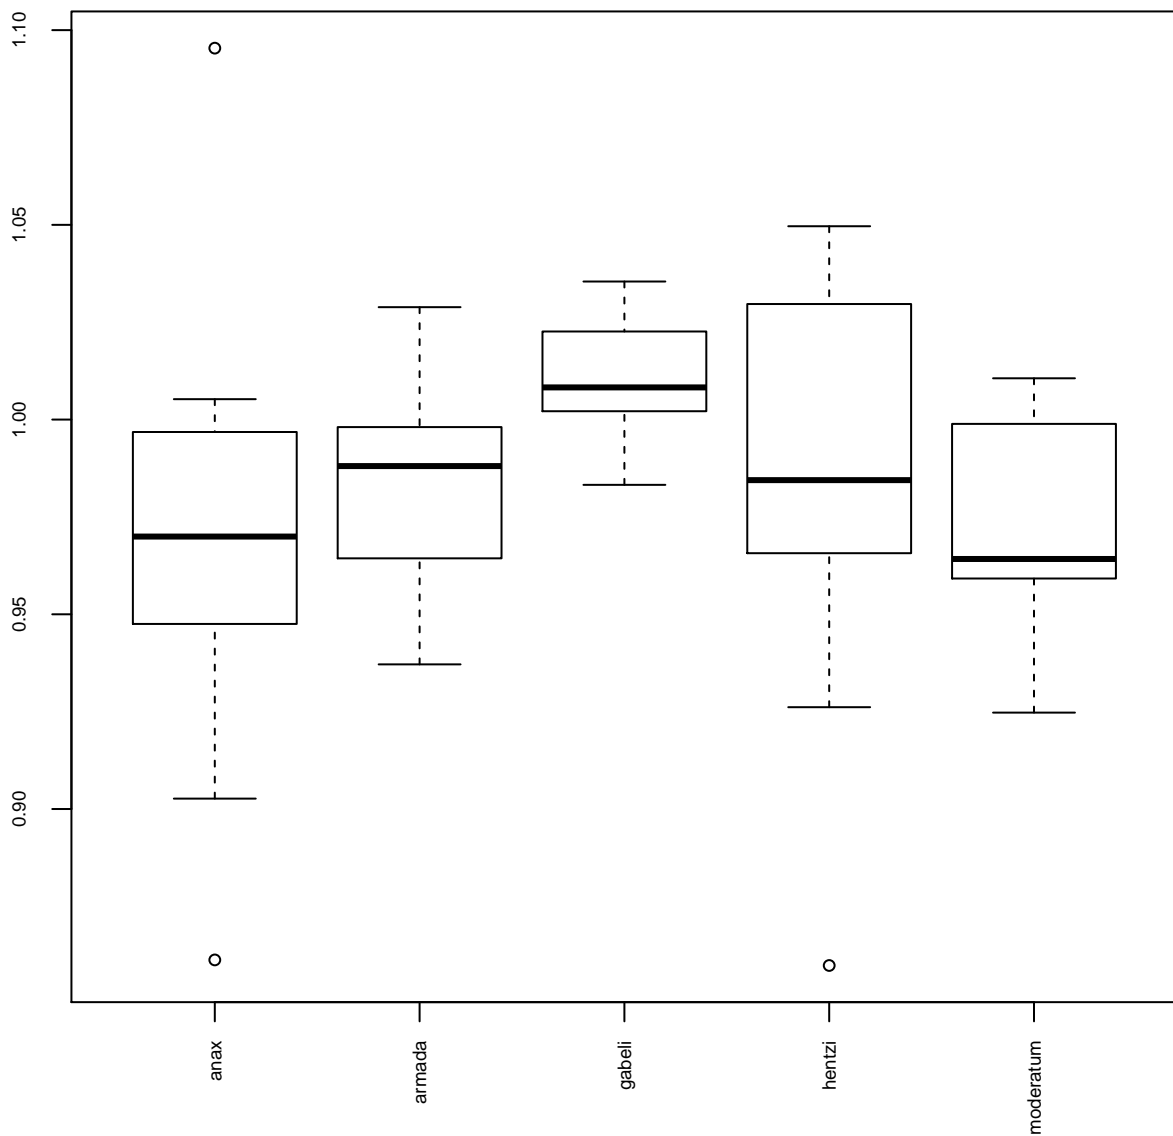

Supplement: Supplementary file 205

## Patella 3/Metatarsus 3 ratio – males

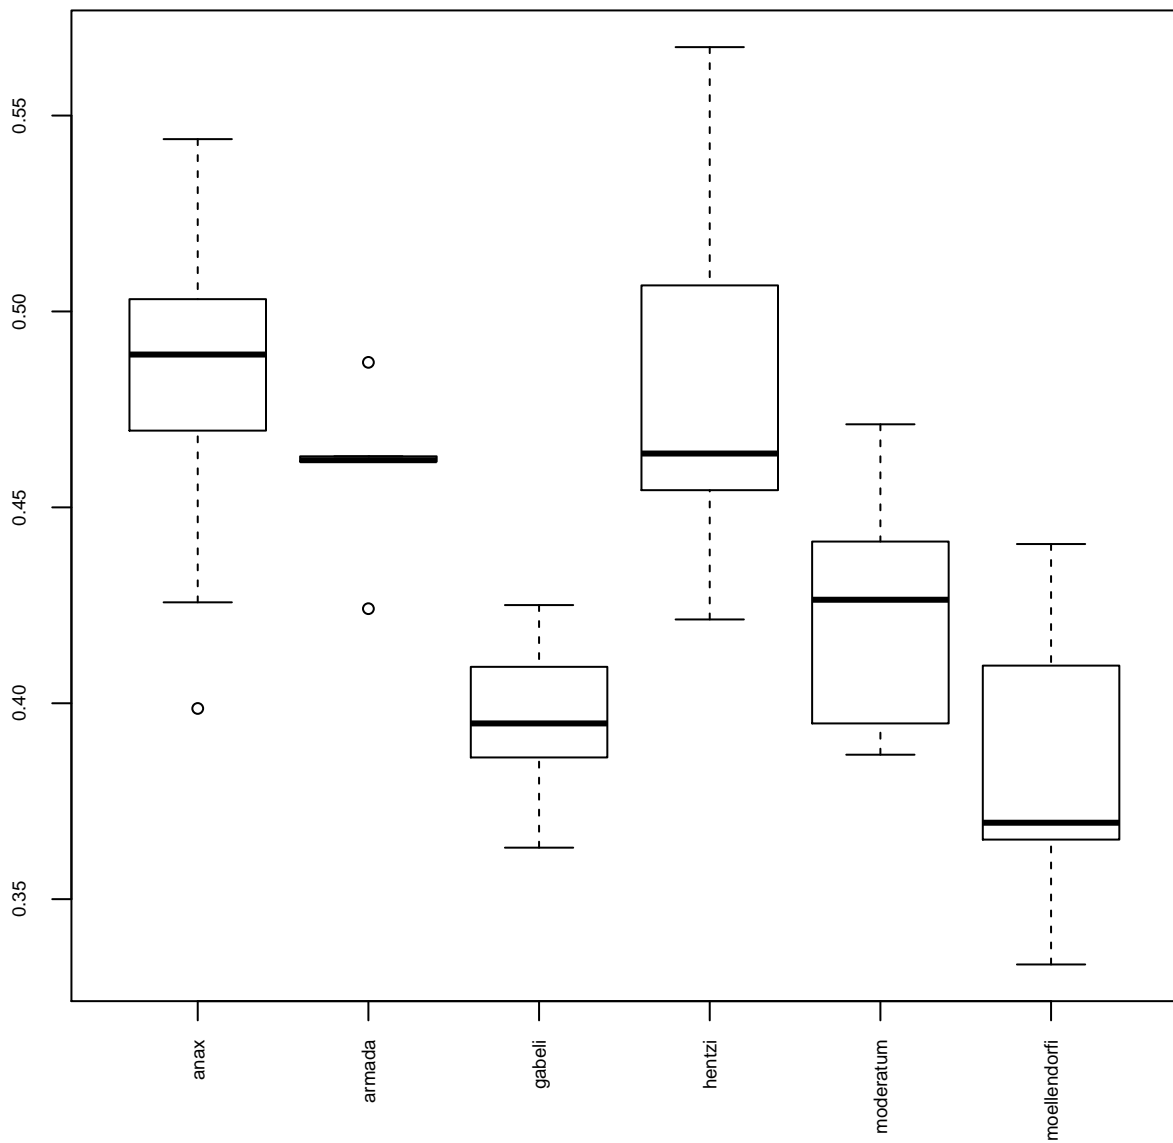

Supplement: Supplementary file 206

# Tarsus 1/Metatarsus 4 Length ratio – males

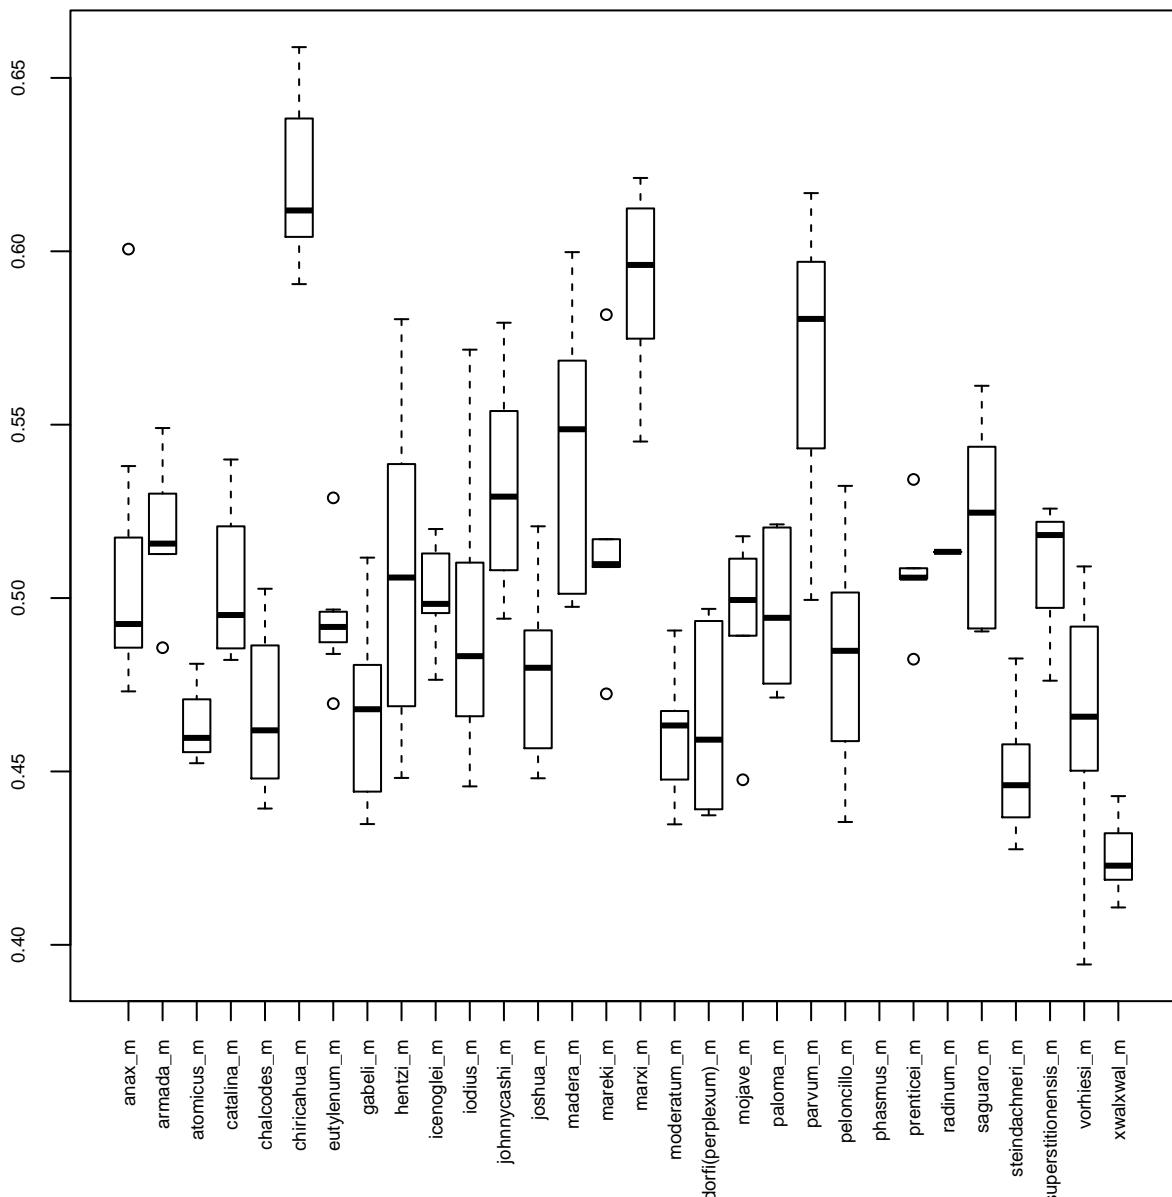

Supplement: Supplementary file 207

## Leg 3 Length – females

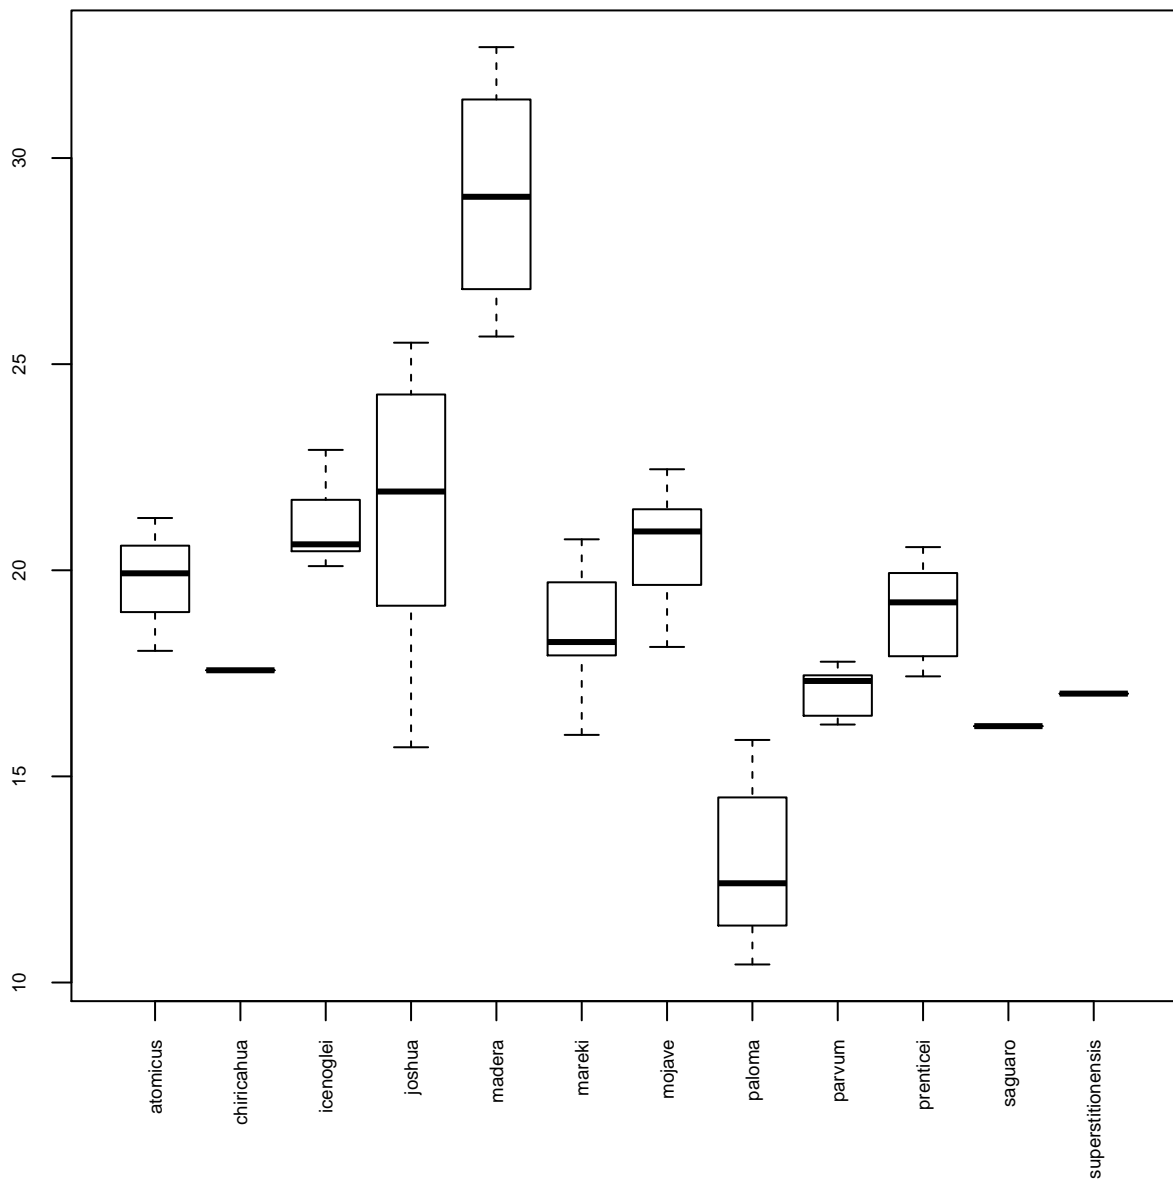

Supplement: Supplementary file 208

## Carapace Length/Tibia 1 ratio – females

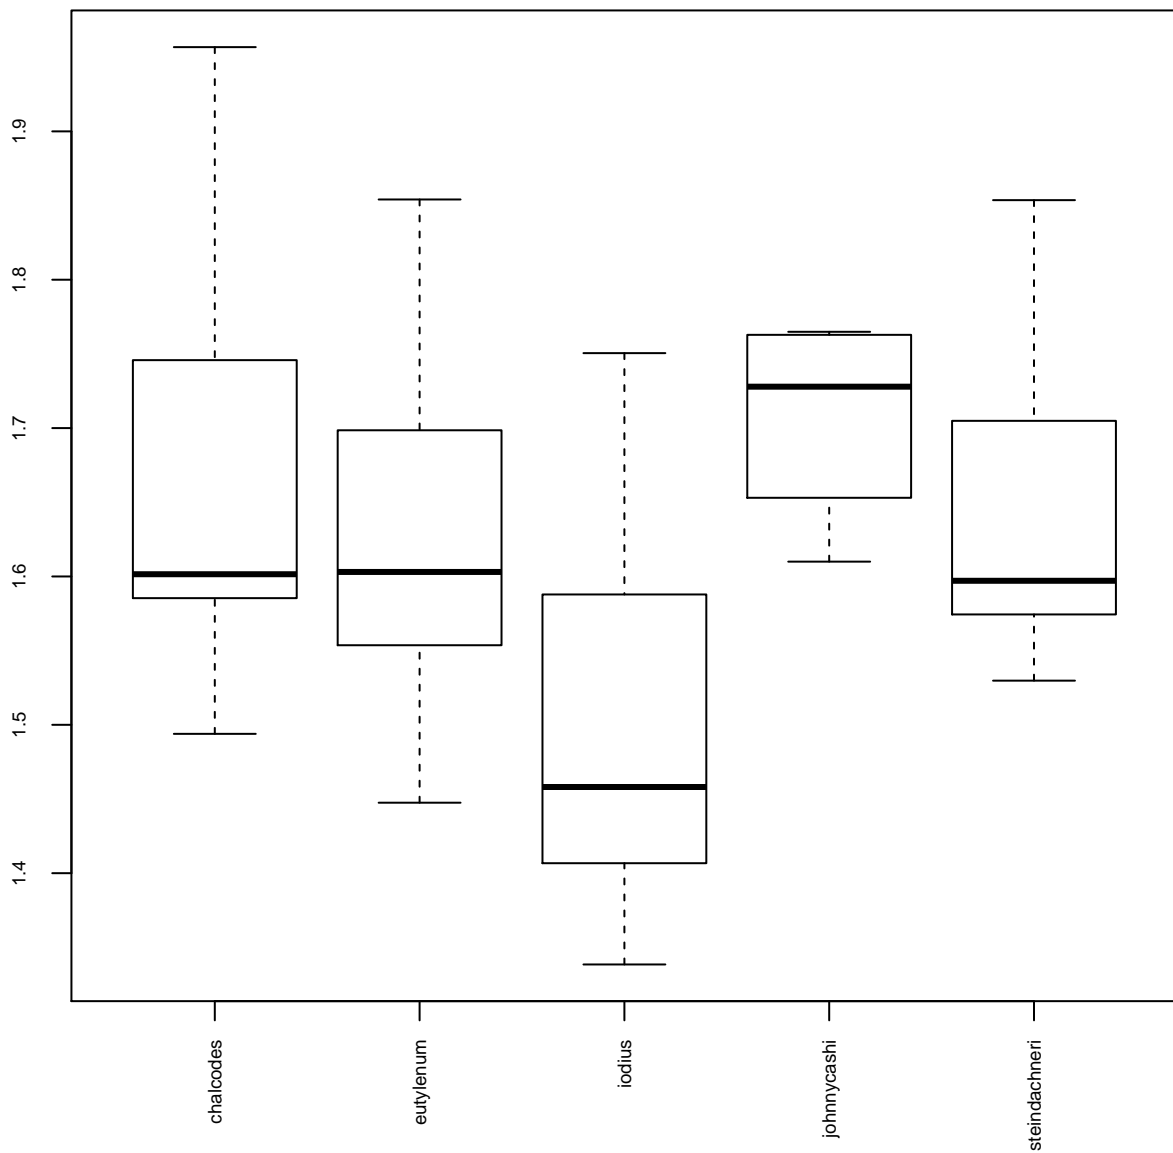

Supplement: Supplementary file 209

## Carapace Length/Tarsus 4 ratio – males

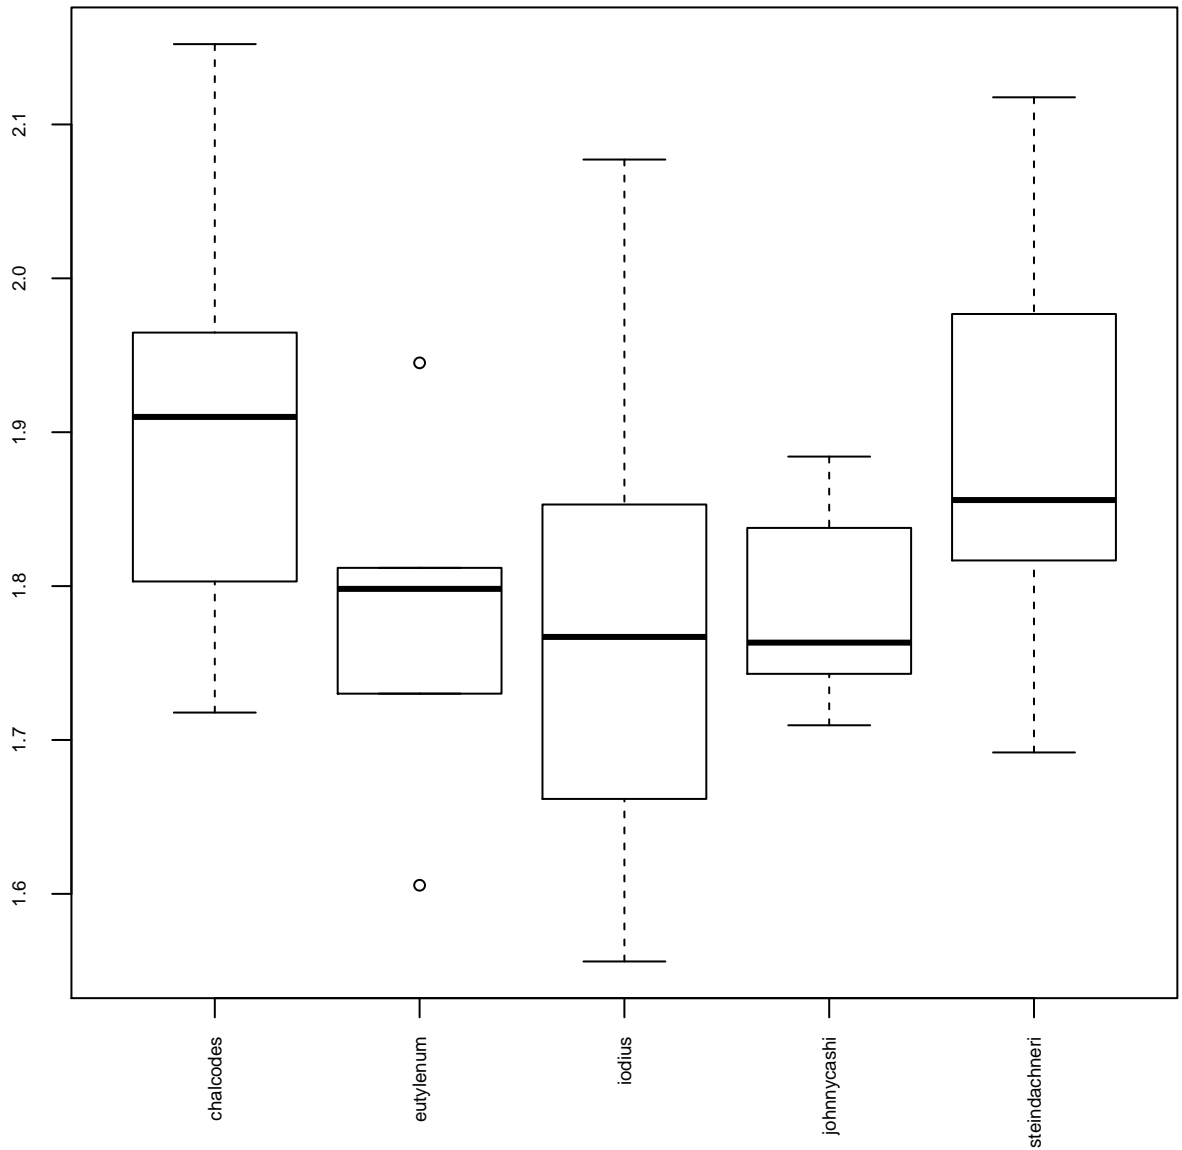

Supplement: Supplementary file 210

## Tibia 3/Metatarsus 3 ratio – females

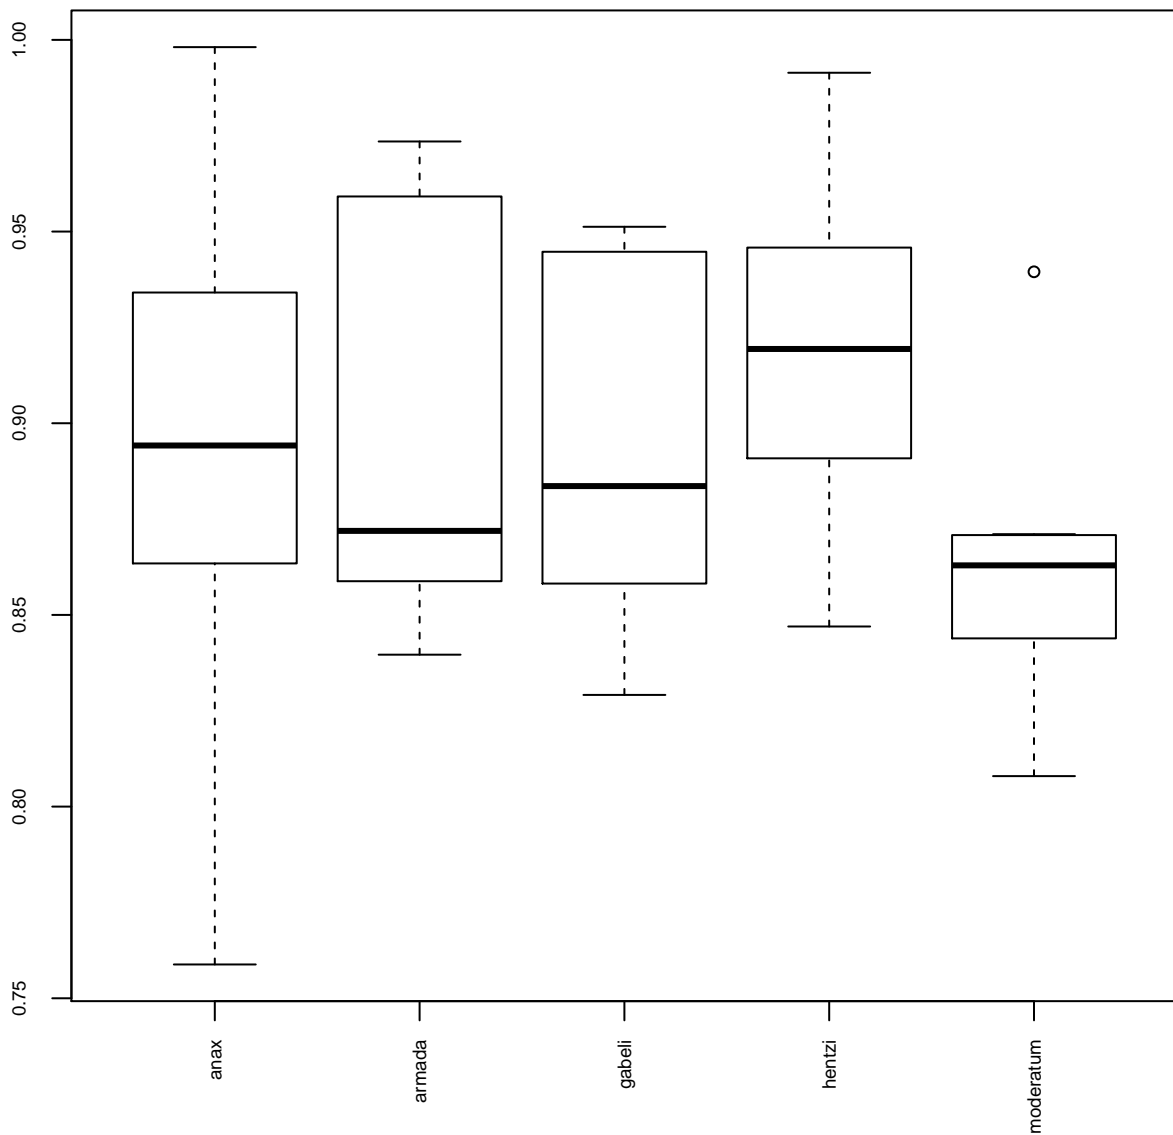

Supplement: Supplementary file 211

## Leg 3 Scopulation ratio – females

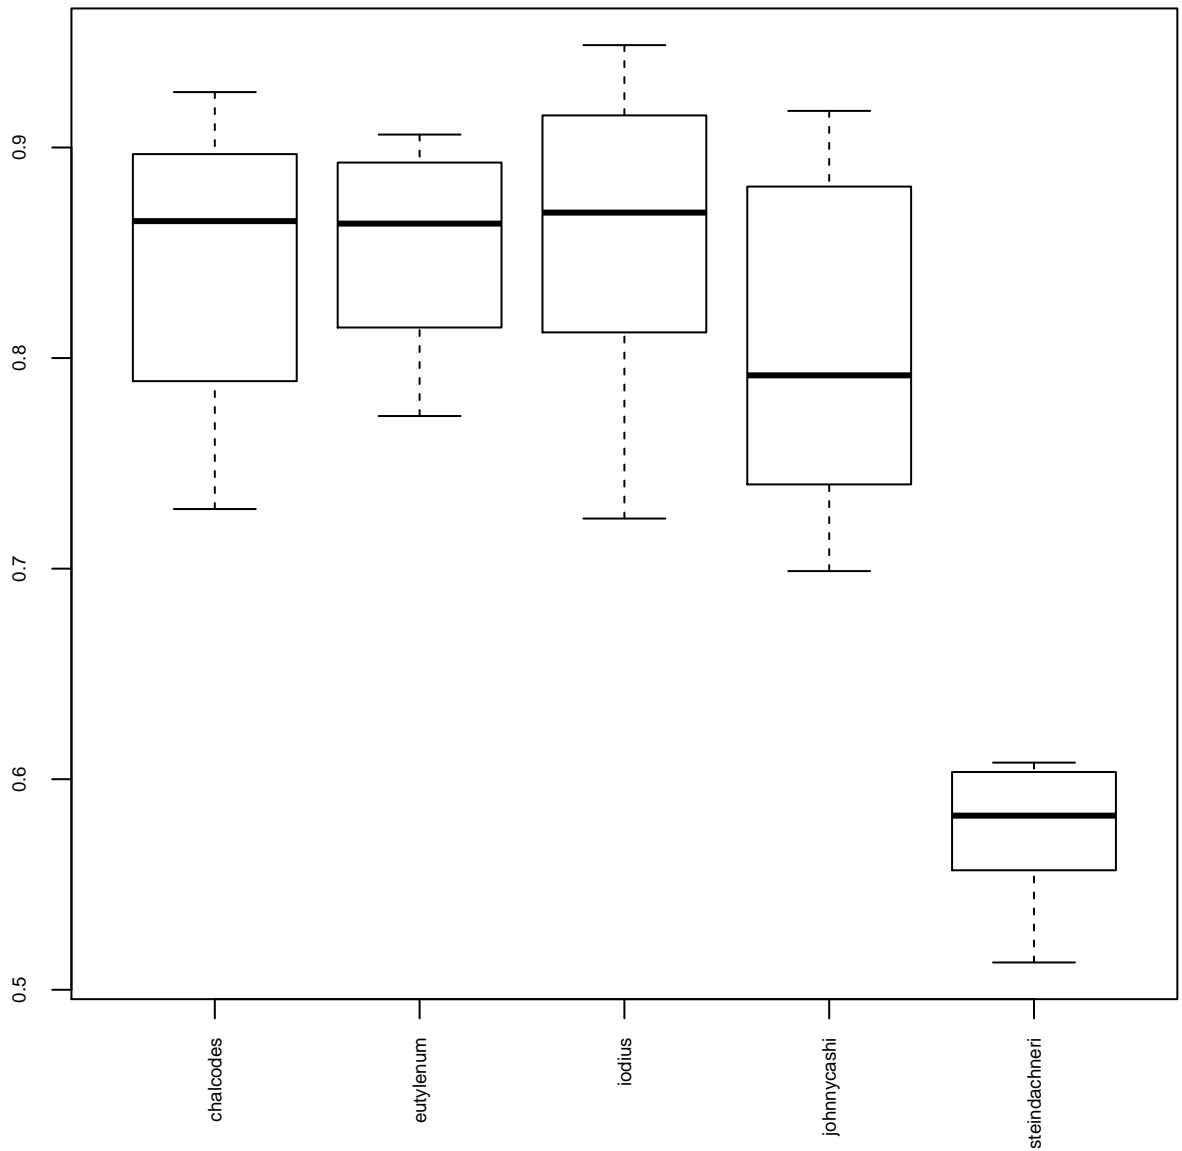

Supplement: Supplementary file 212

## Patella 3/Tibia 3 ratio – females

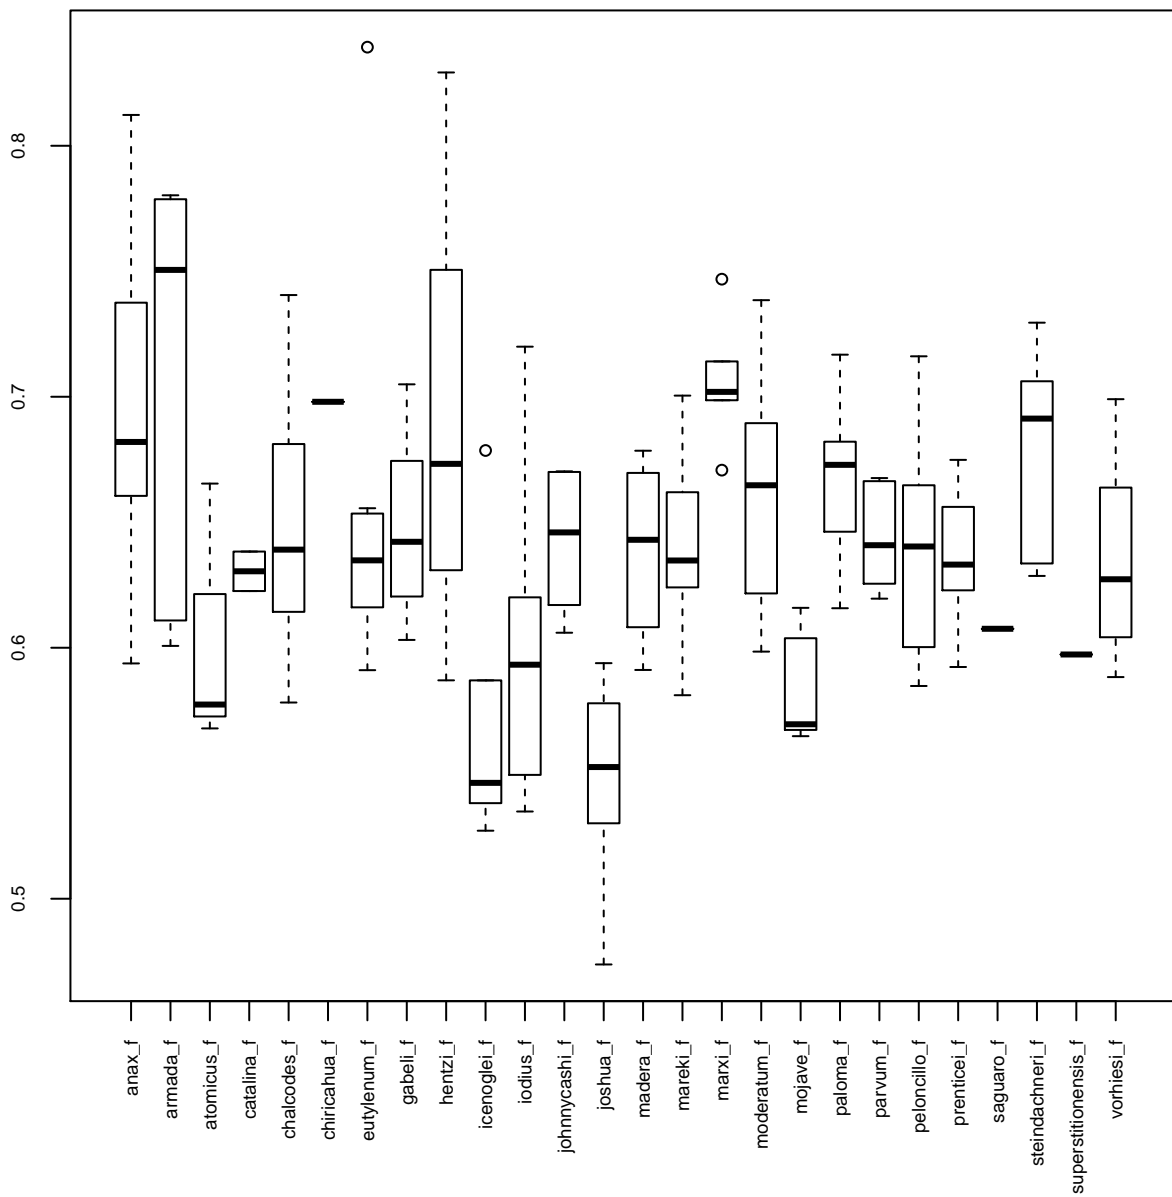

Supplement: Supplementary file 213

## Tibia 3/Femur 4 Length ratio – females

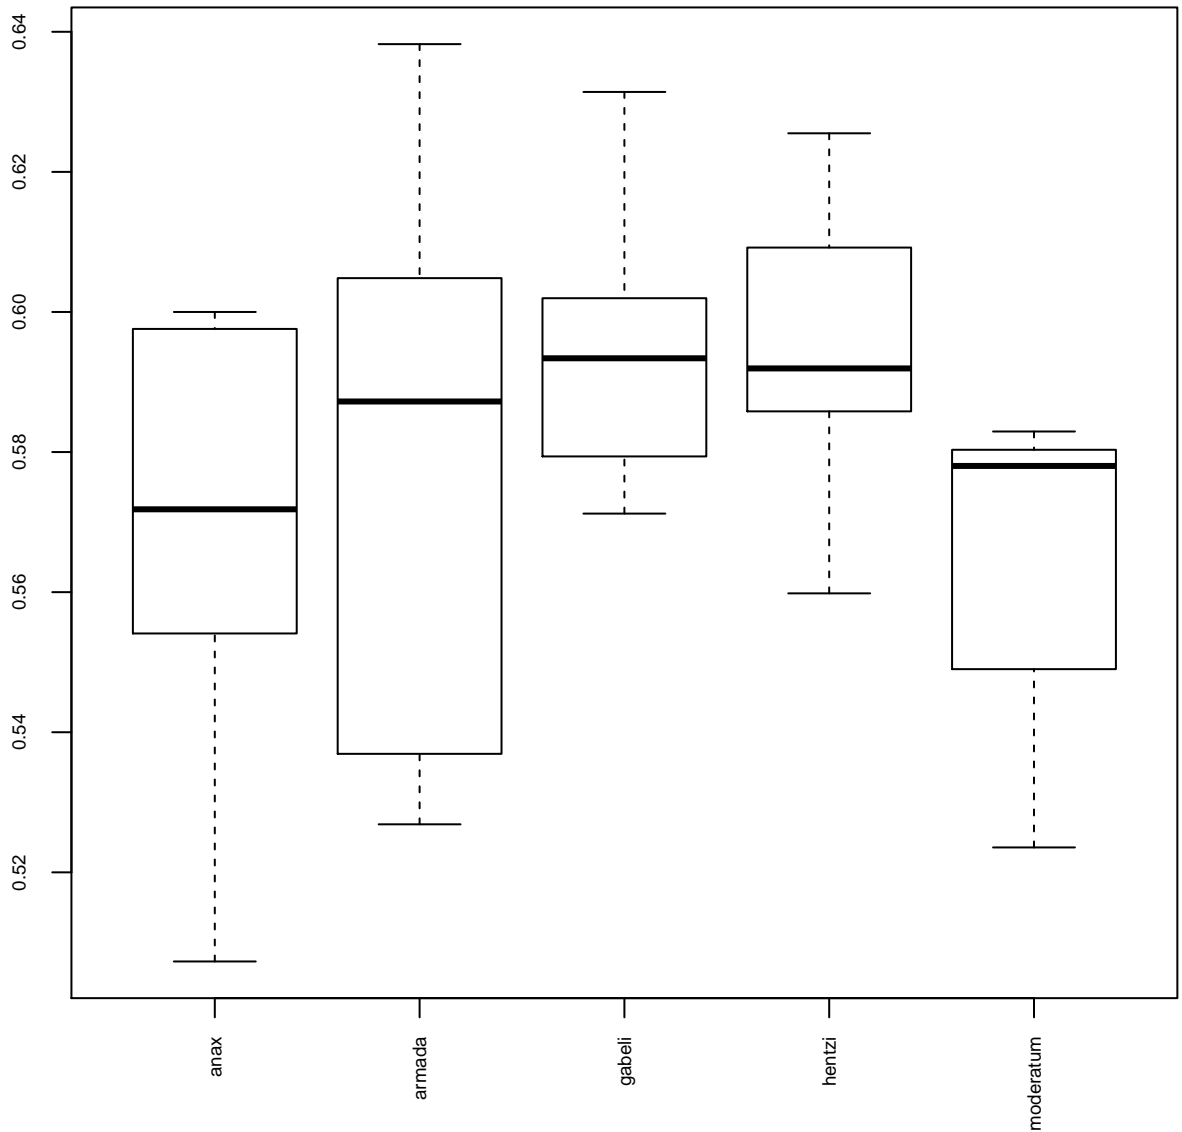

Supplement: Supplementary file 214

## Femur 1/Metatarsus 1 ratio – females

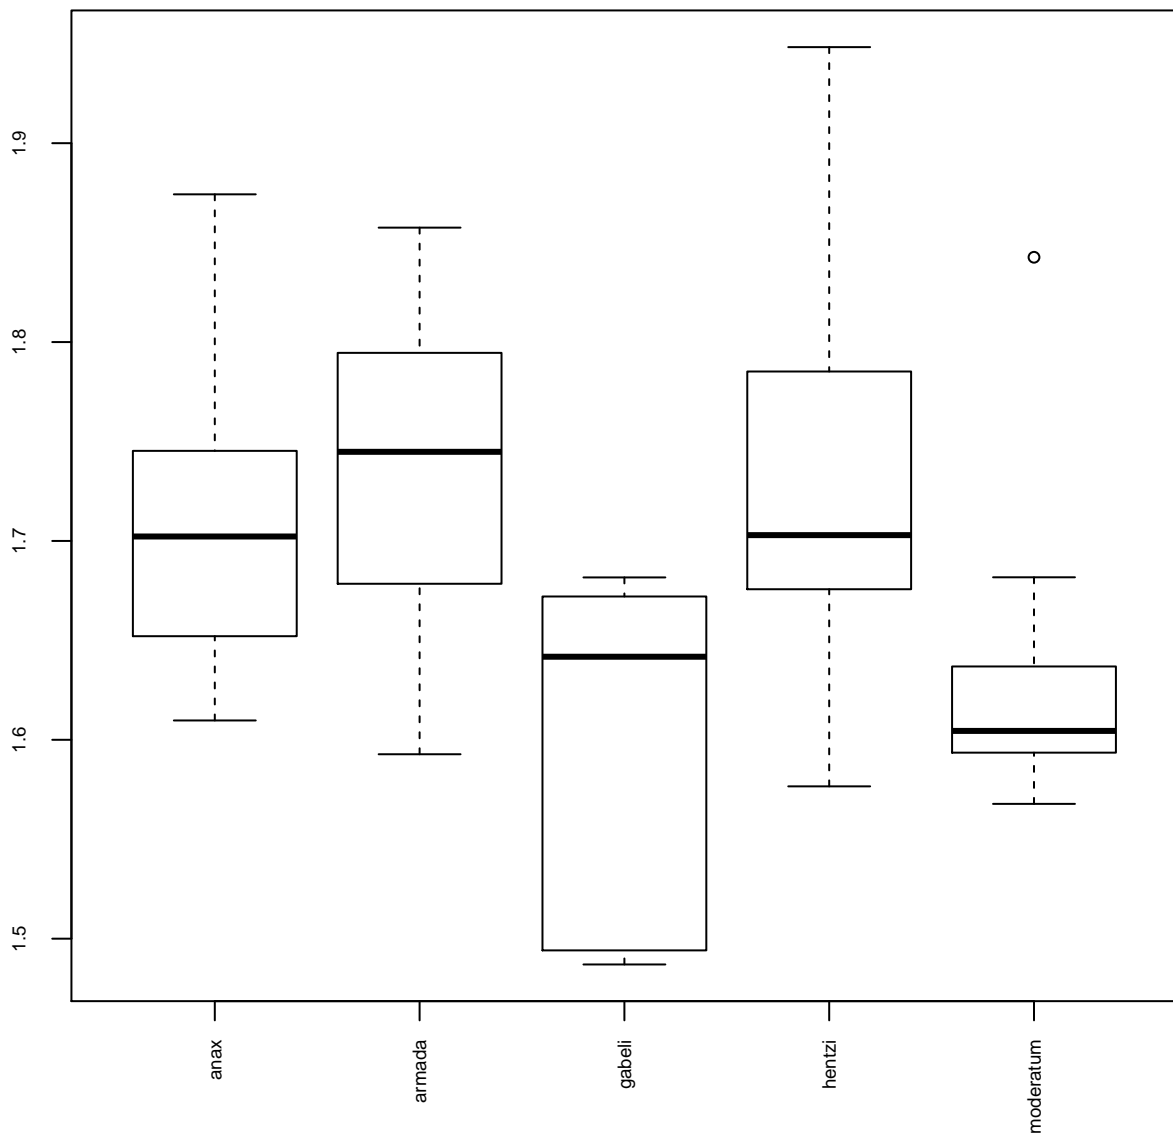

Supplement: Supplementary file 215

# Tibia 3/Femur 4 Length ratio – females

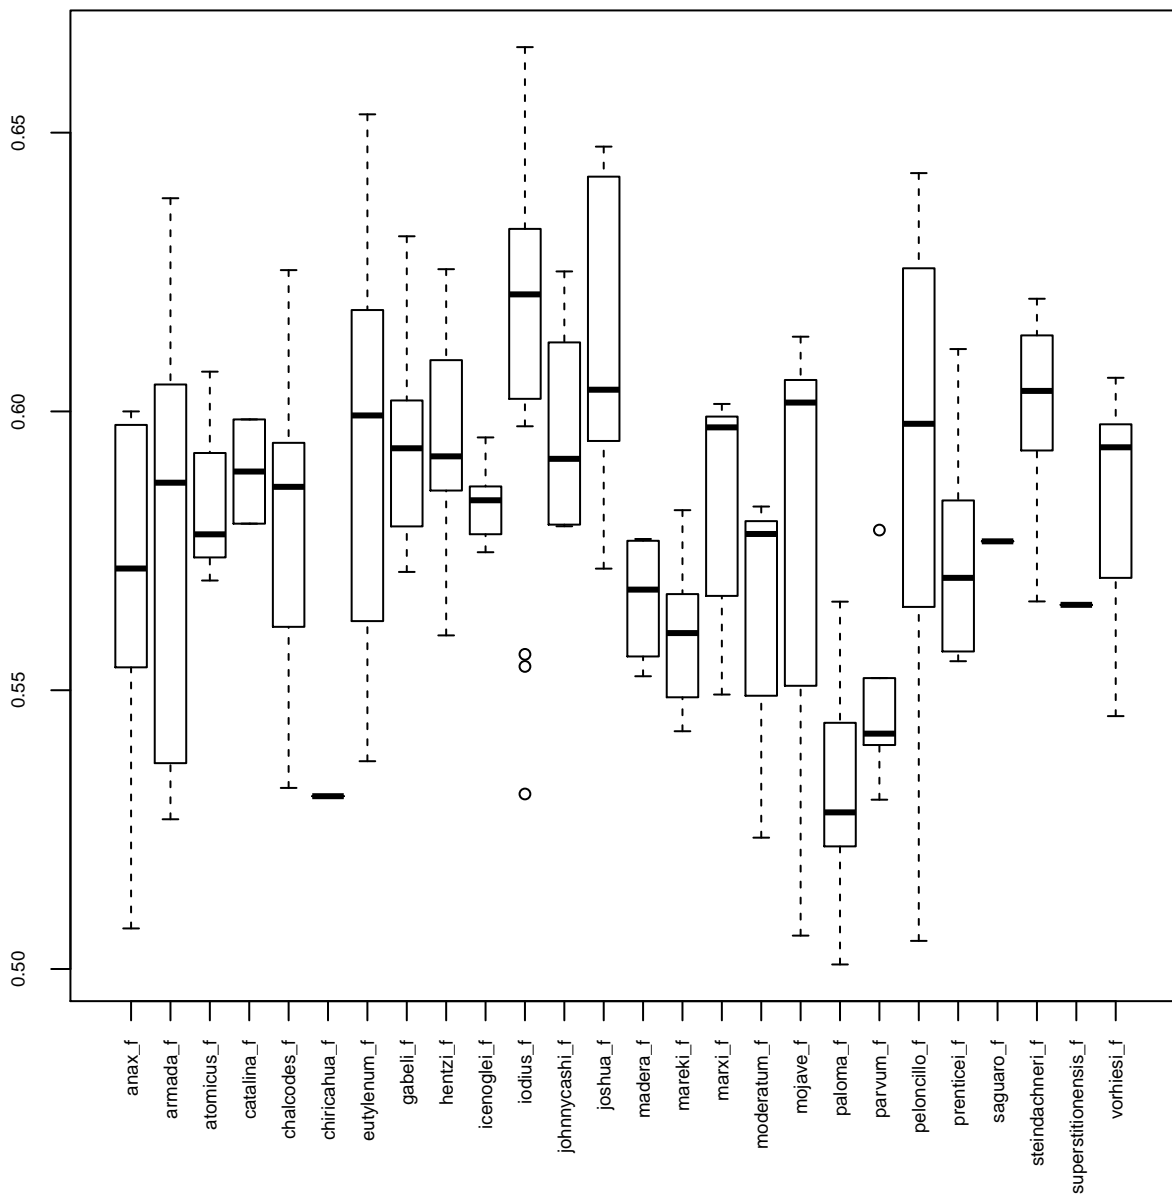

Supplement: Supplementary file 216

## Carapace Length/Patella 3 ratio – males

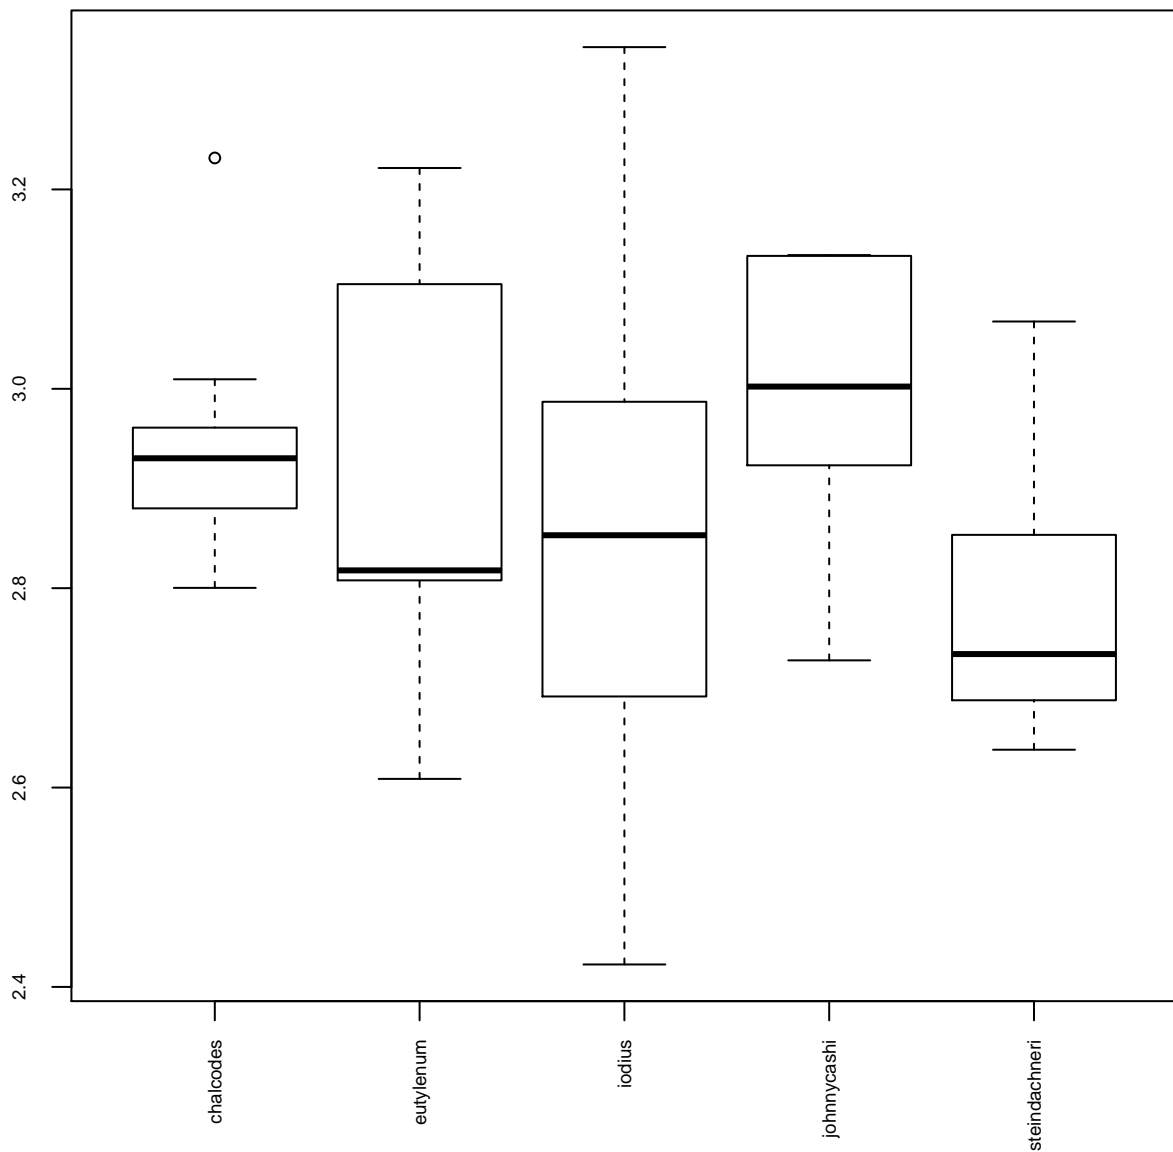

Supplement: Supplementary file 217

## Femur 1/Patella 3 ratio – females

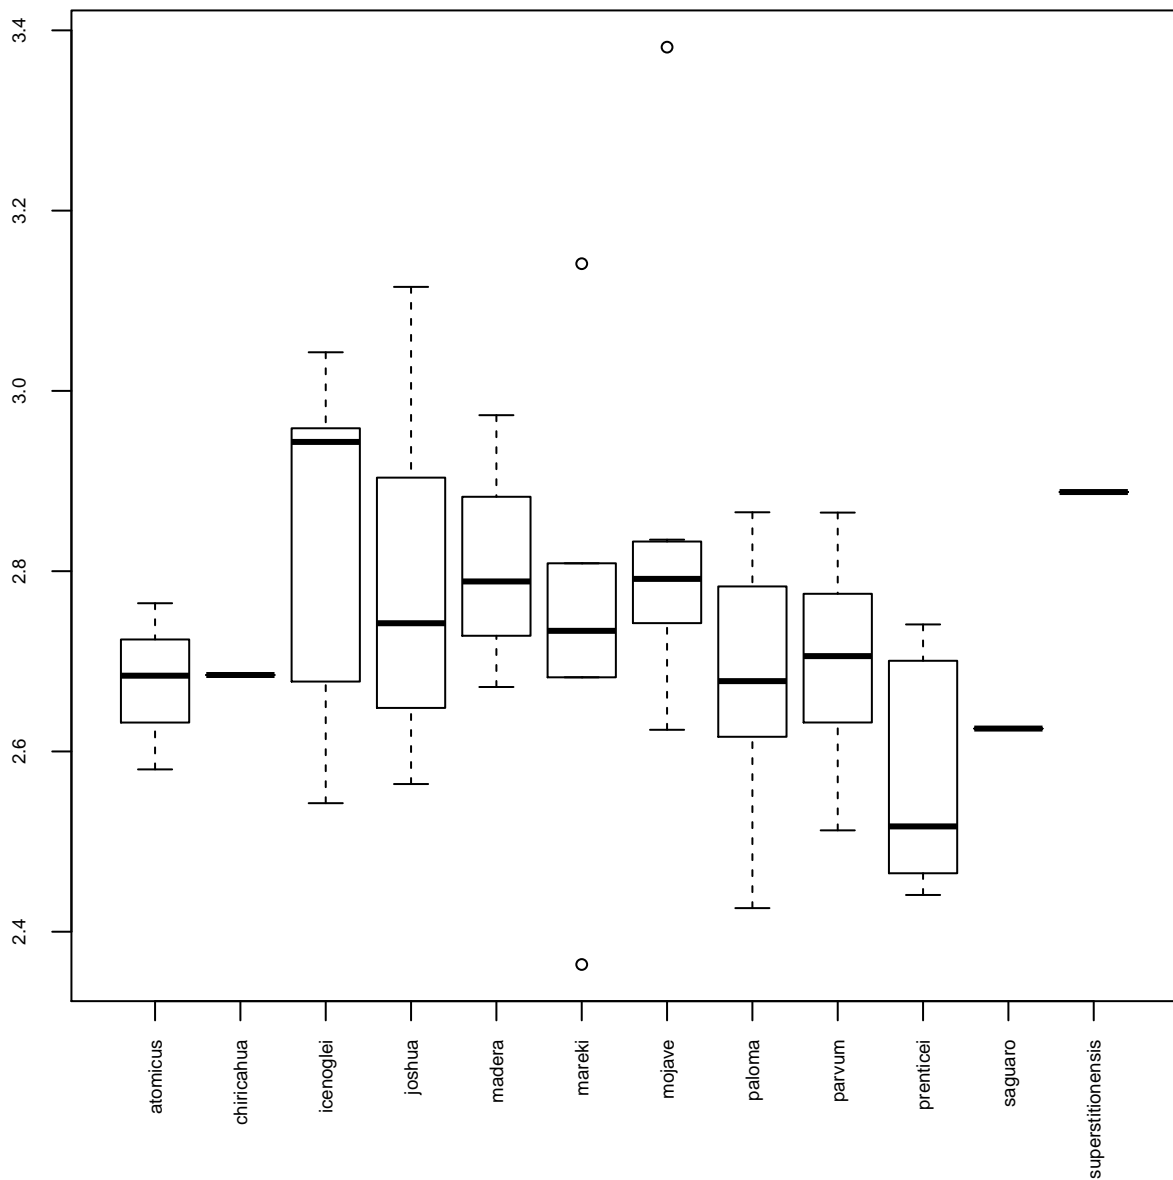

Supplement: Supplementary file 218

## Metatarsus 3/Tarsus 4 Length ratio – females

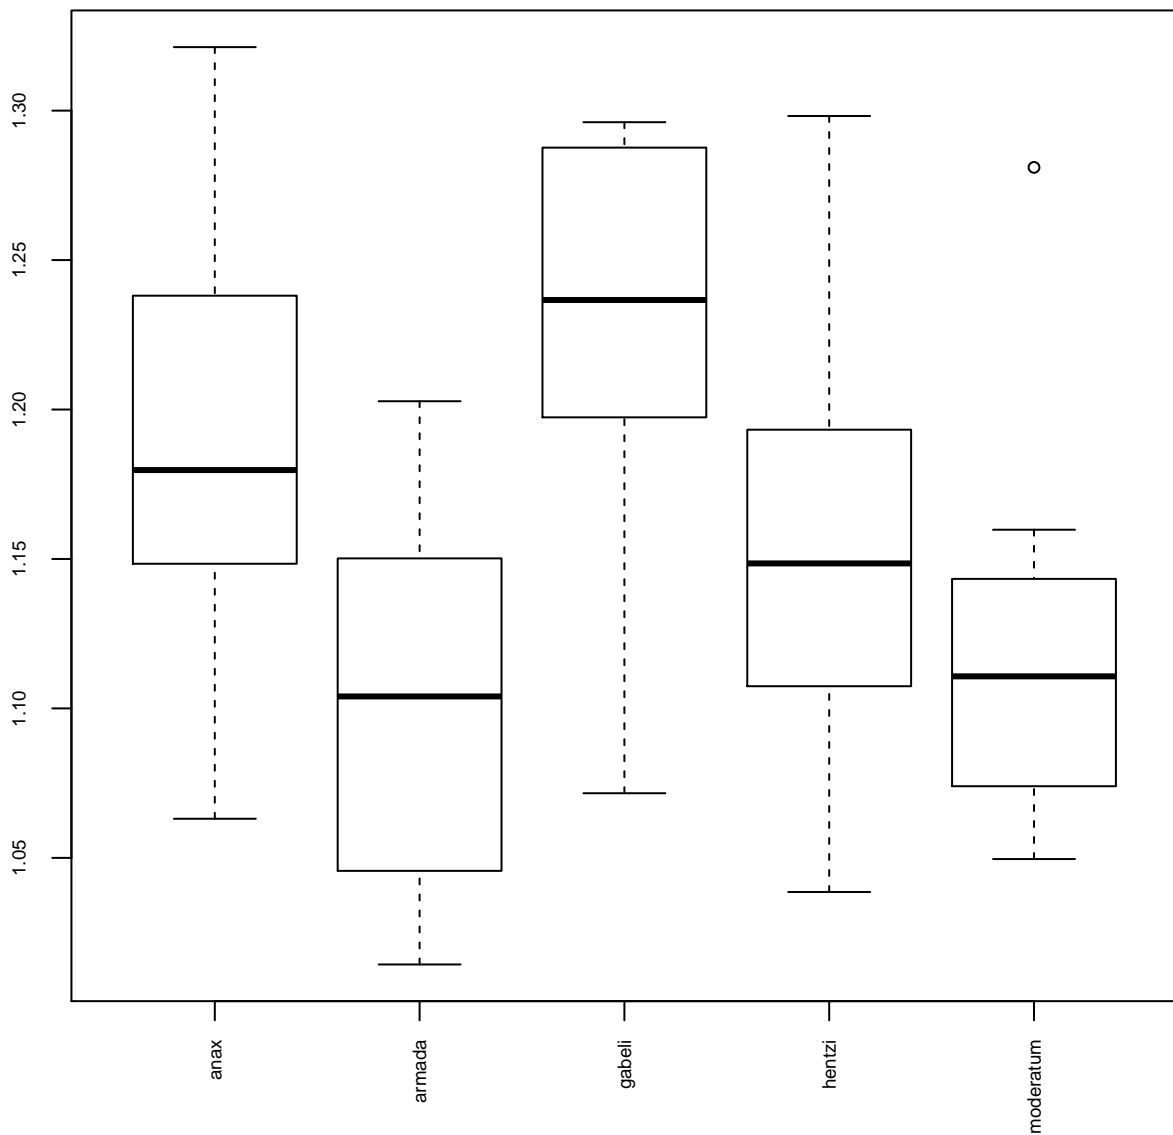

Supplement: Supplementary file 219

## Femur 4 Length/Width ratio – males

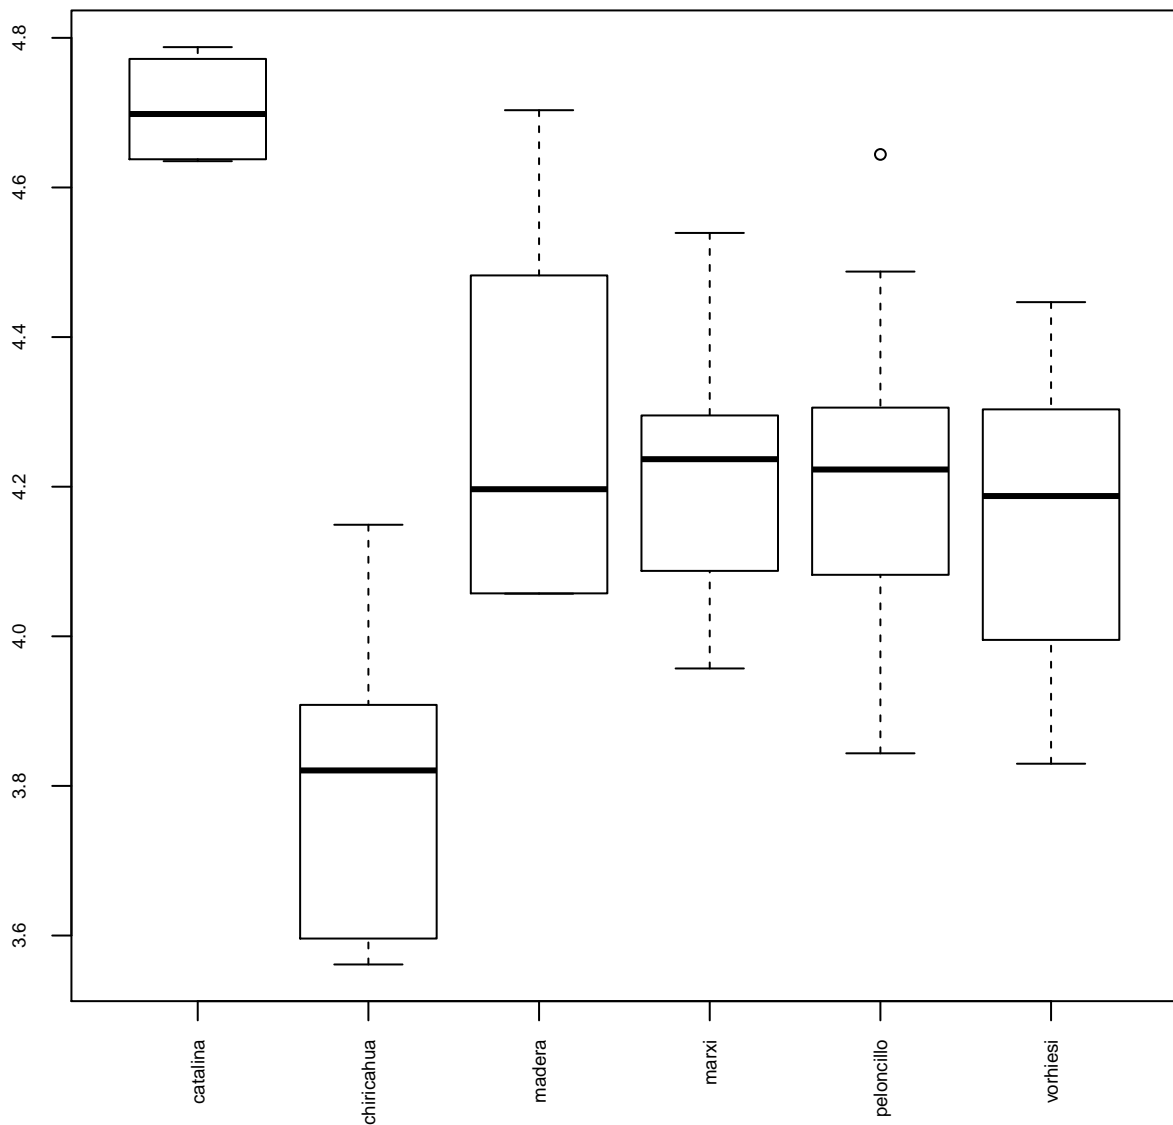

Supplement: Supplementary file 220

## Tibia 4/Metatarsus 4 ratio – females

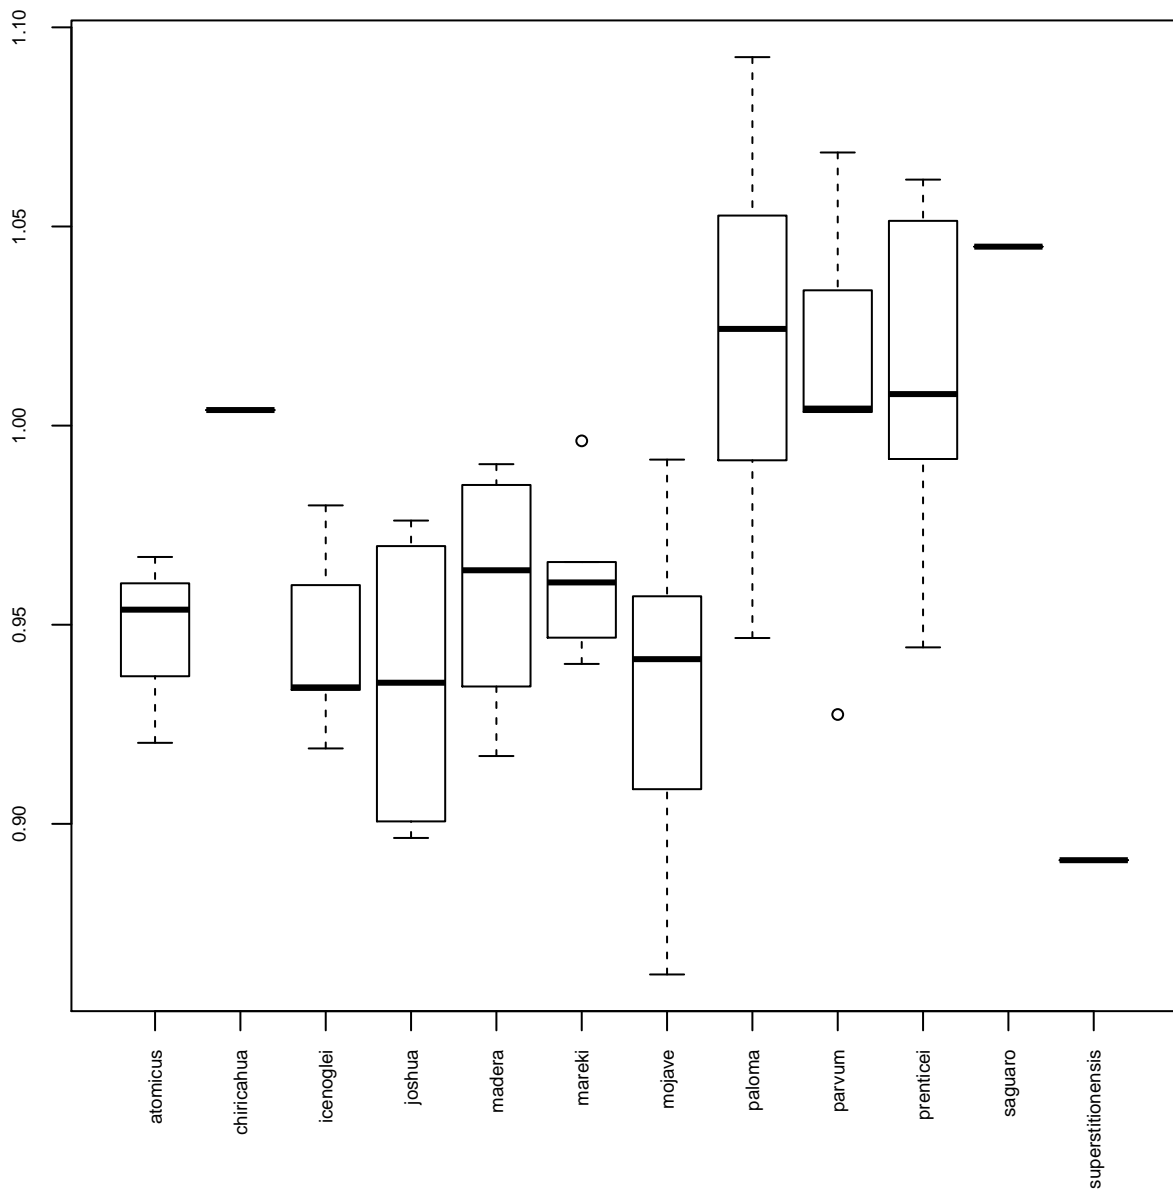

Supplement: Supplementary file 221

## Femur 3/Metatarsus 4 Length ratio – females

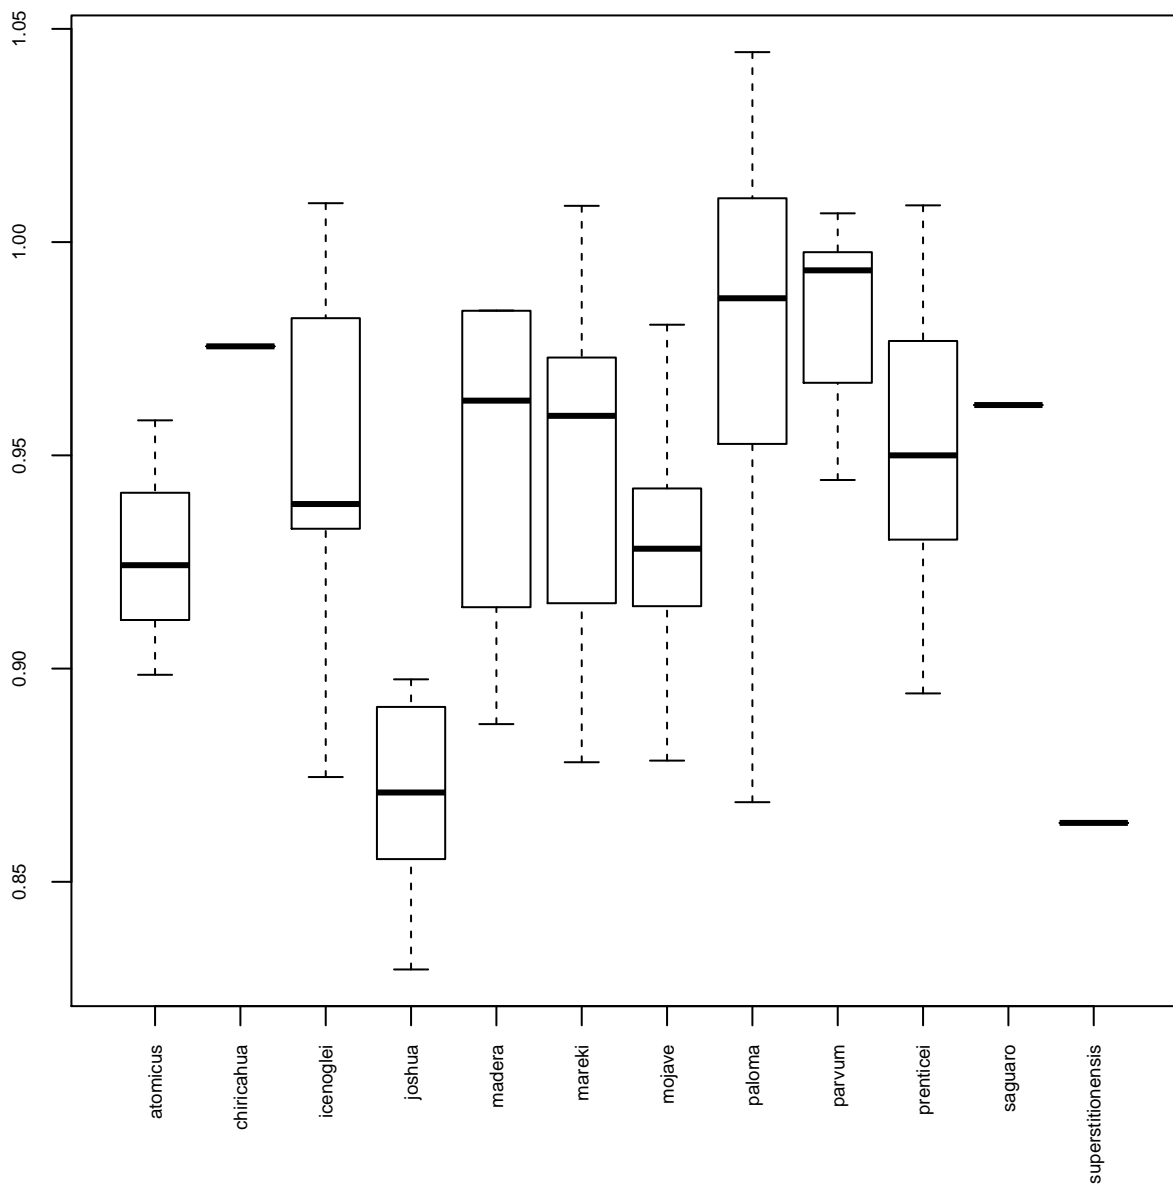

Supplement: Supplementary file 222

## Femur 1/Patella 3 ratio – females

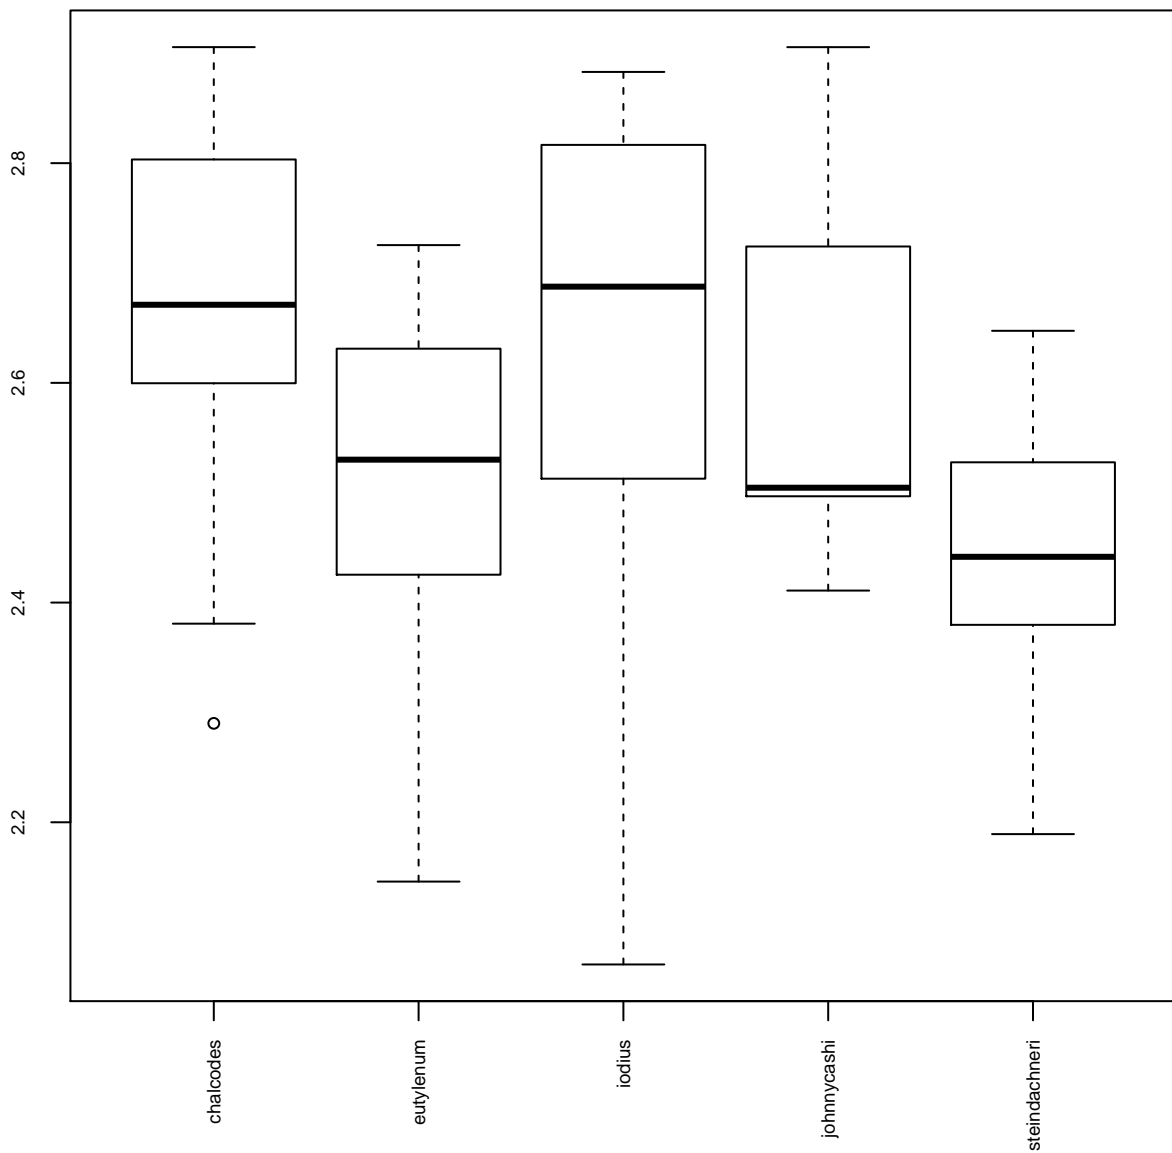

Supplement: Supplementary file 223

## Tarsus 3/Tibia 4 Length ratio – females

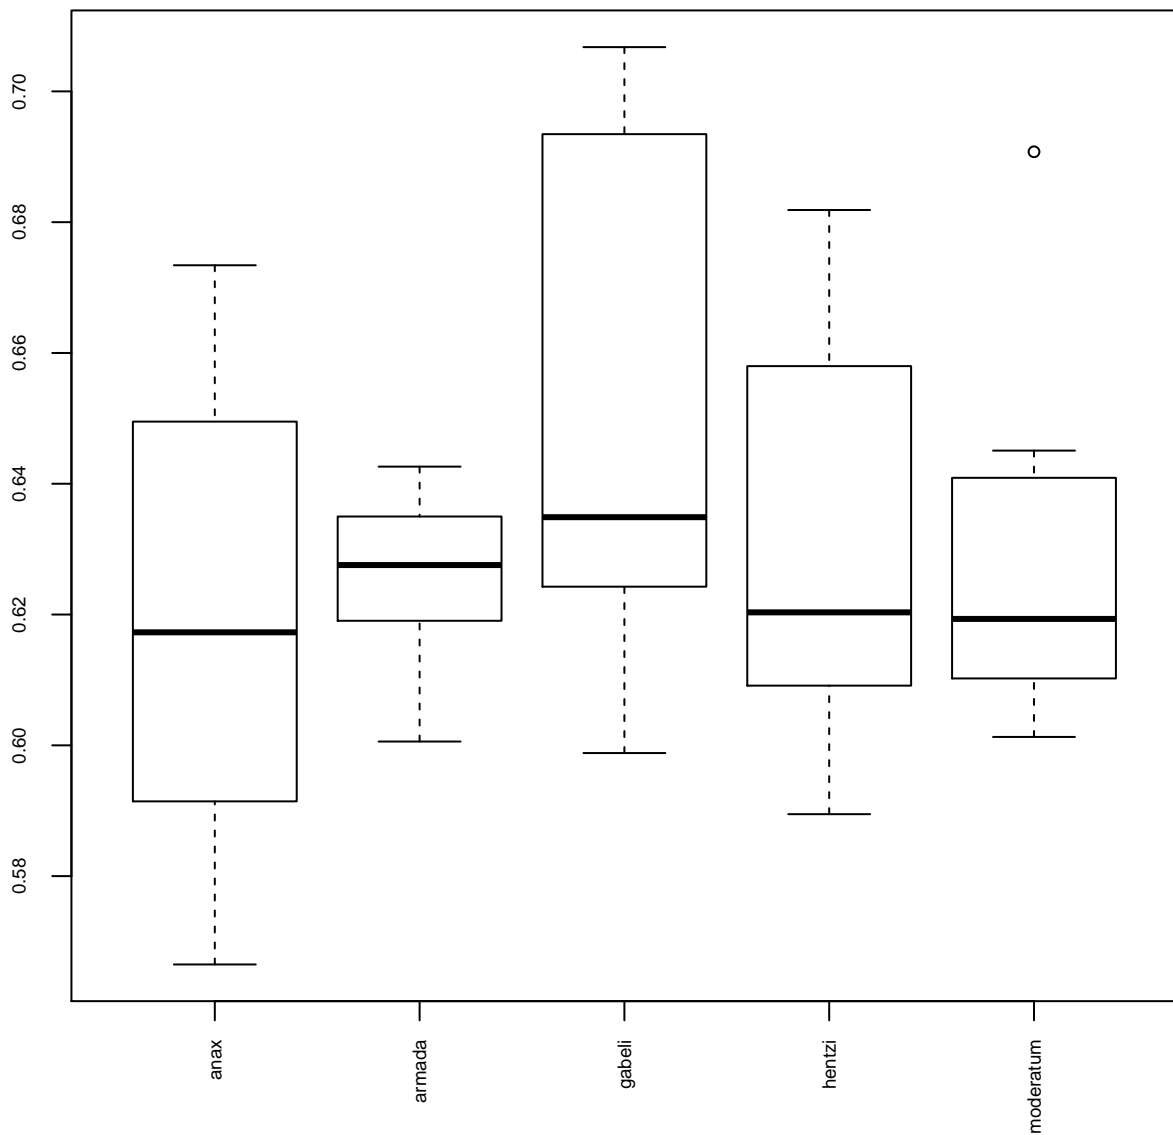

Supplement: Supplementary file 224

## Tibia 1/Tibia 3 ratio – females

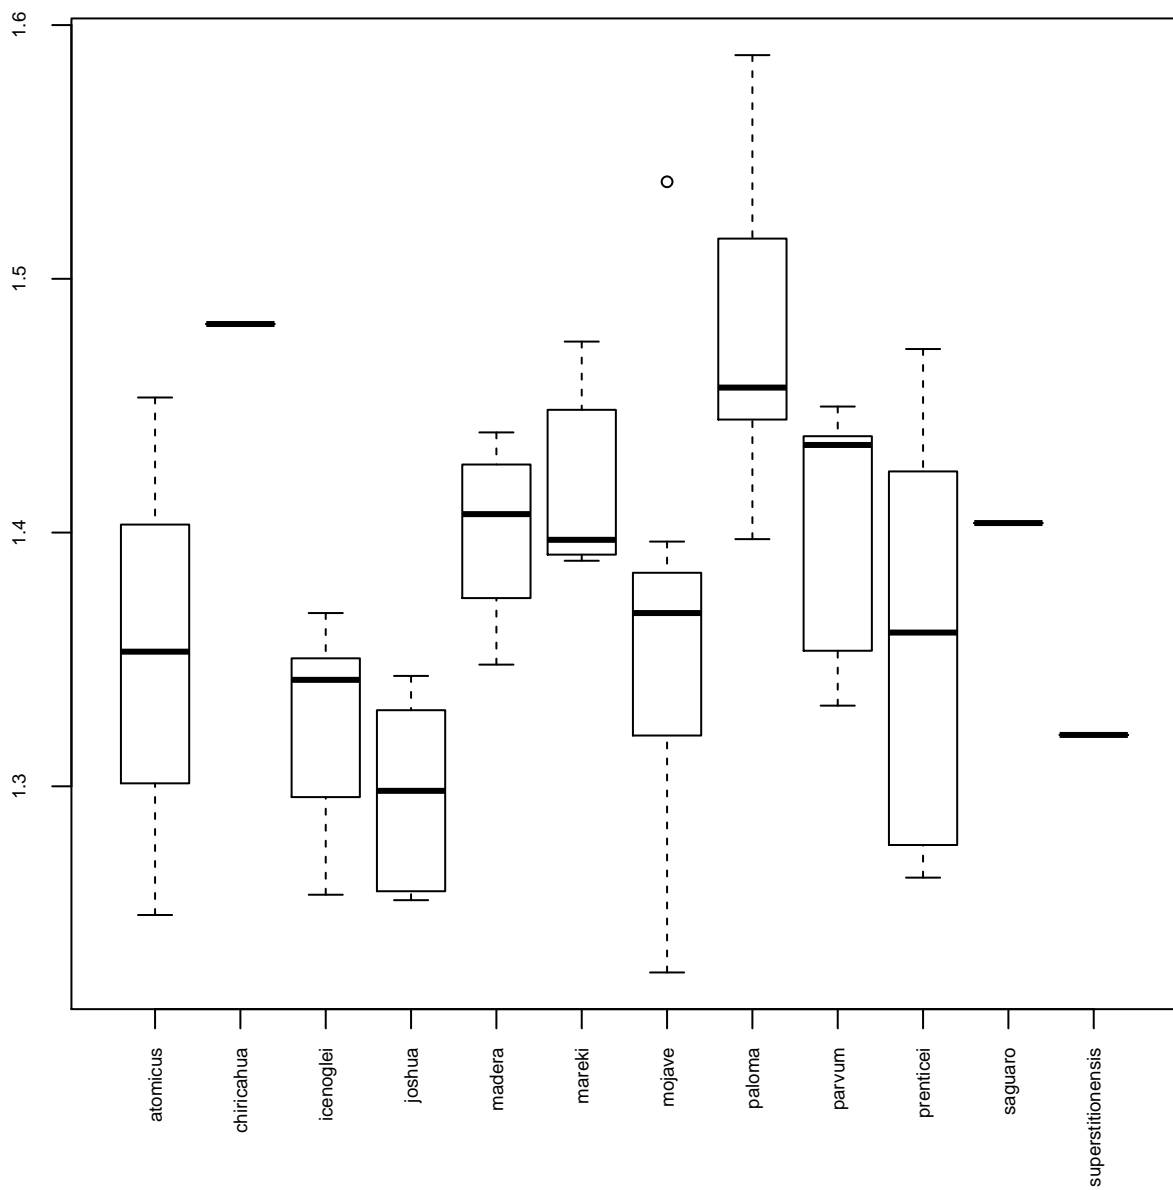

Supplement: Supplementary file 225

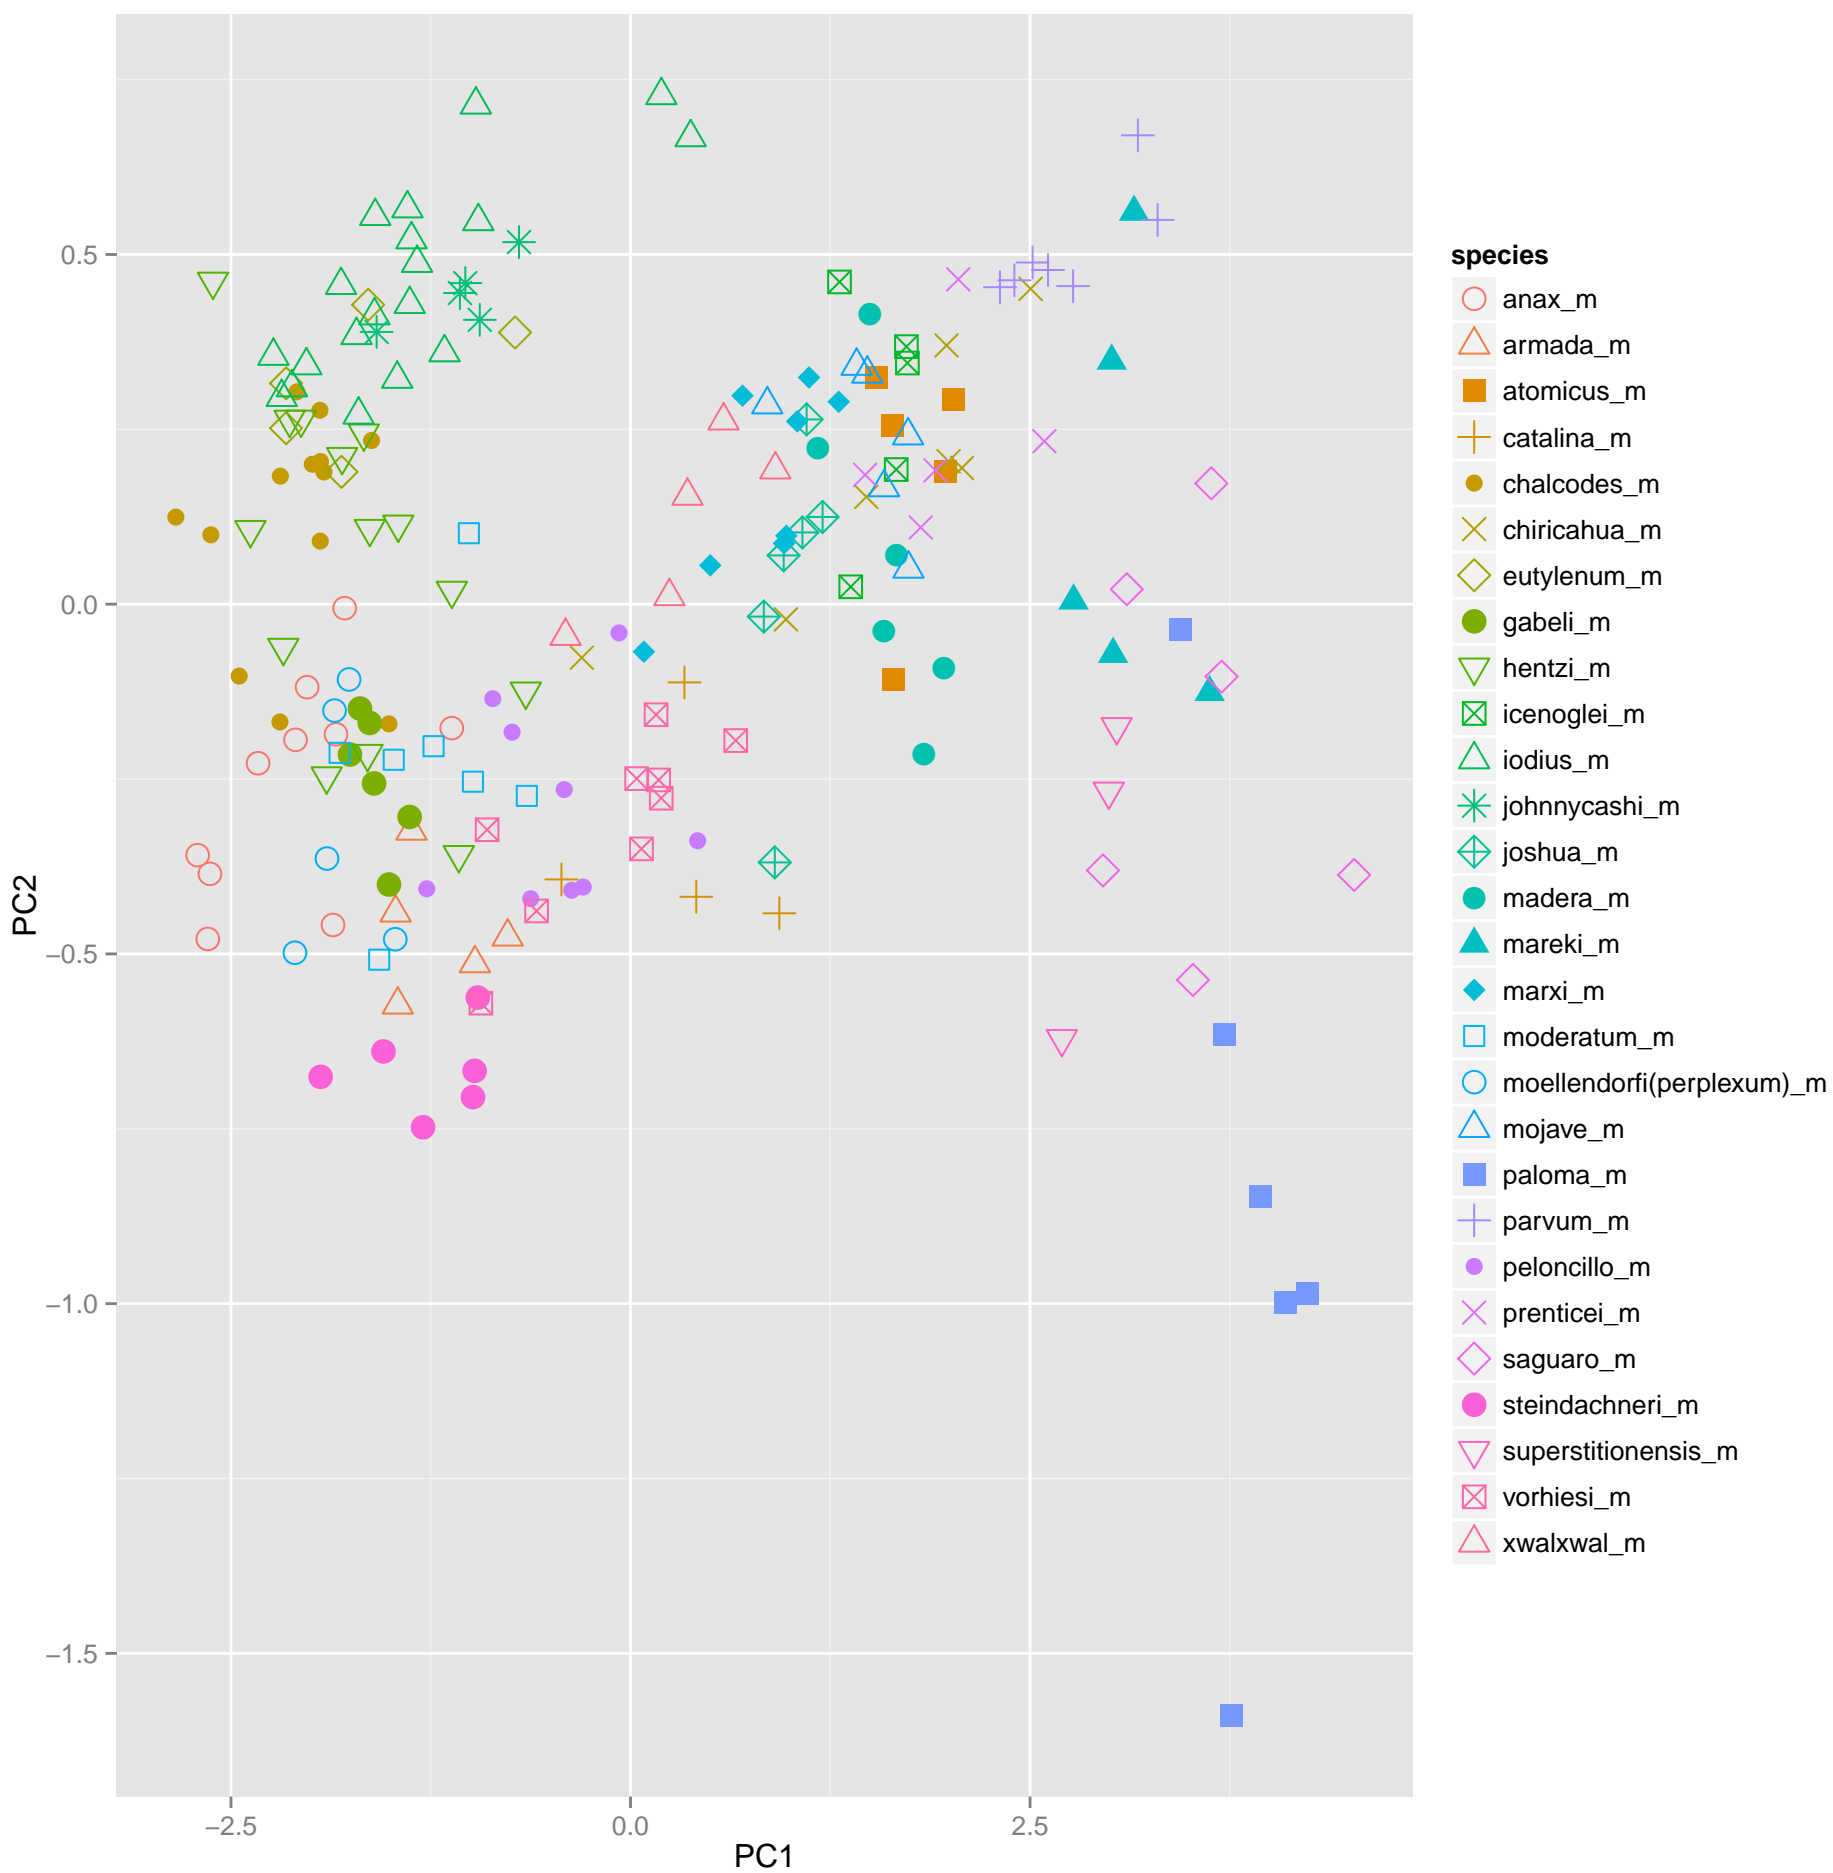

Supplement: Supplementary file 226

## Metatarsus 1/Patella 4 Length ratio – males

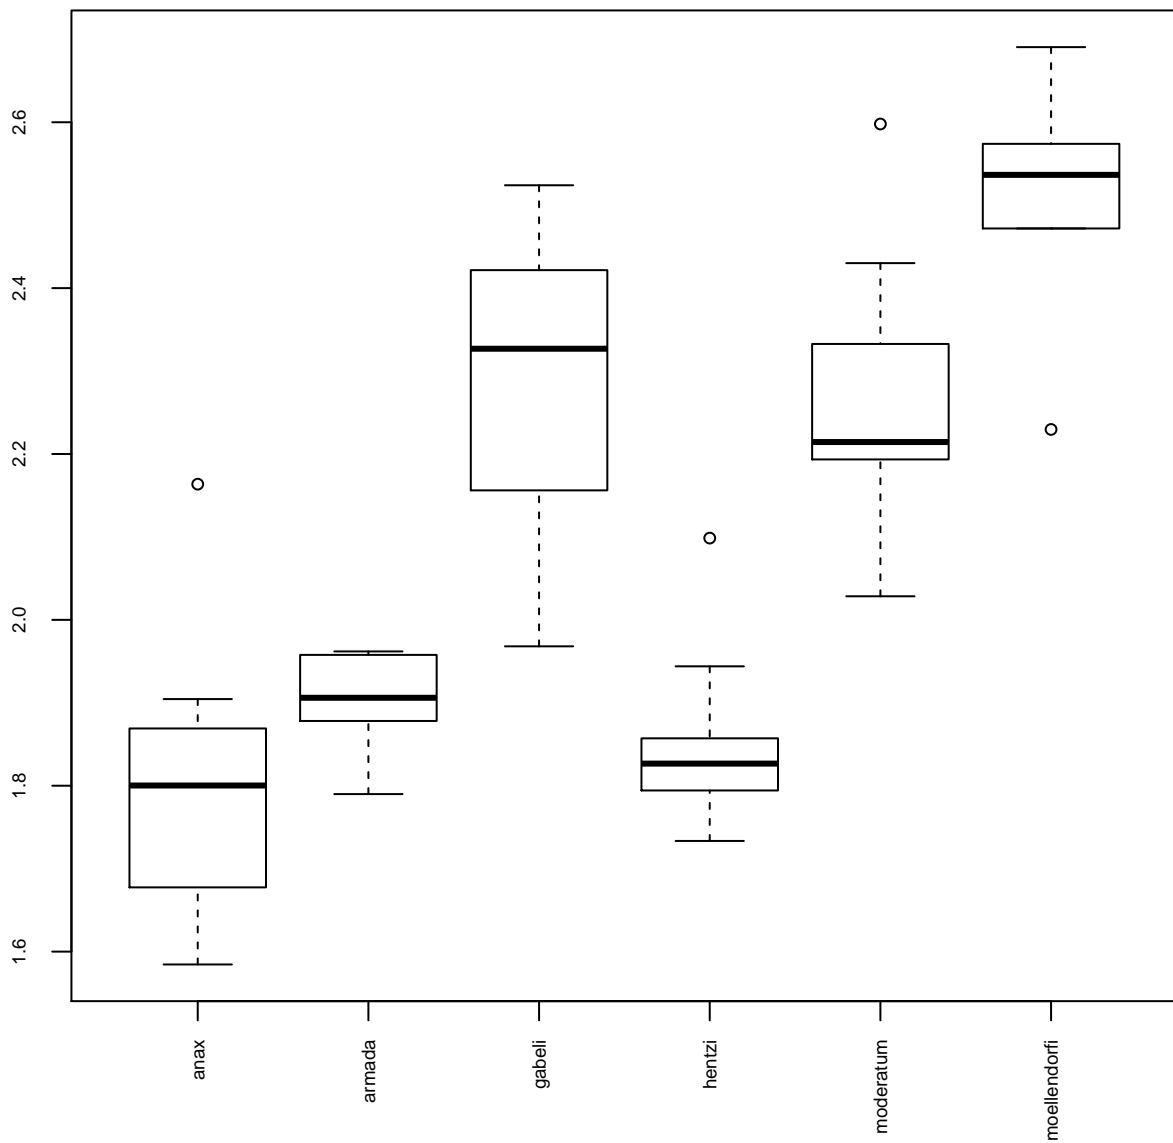

Supplement: Supplementary file 227

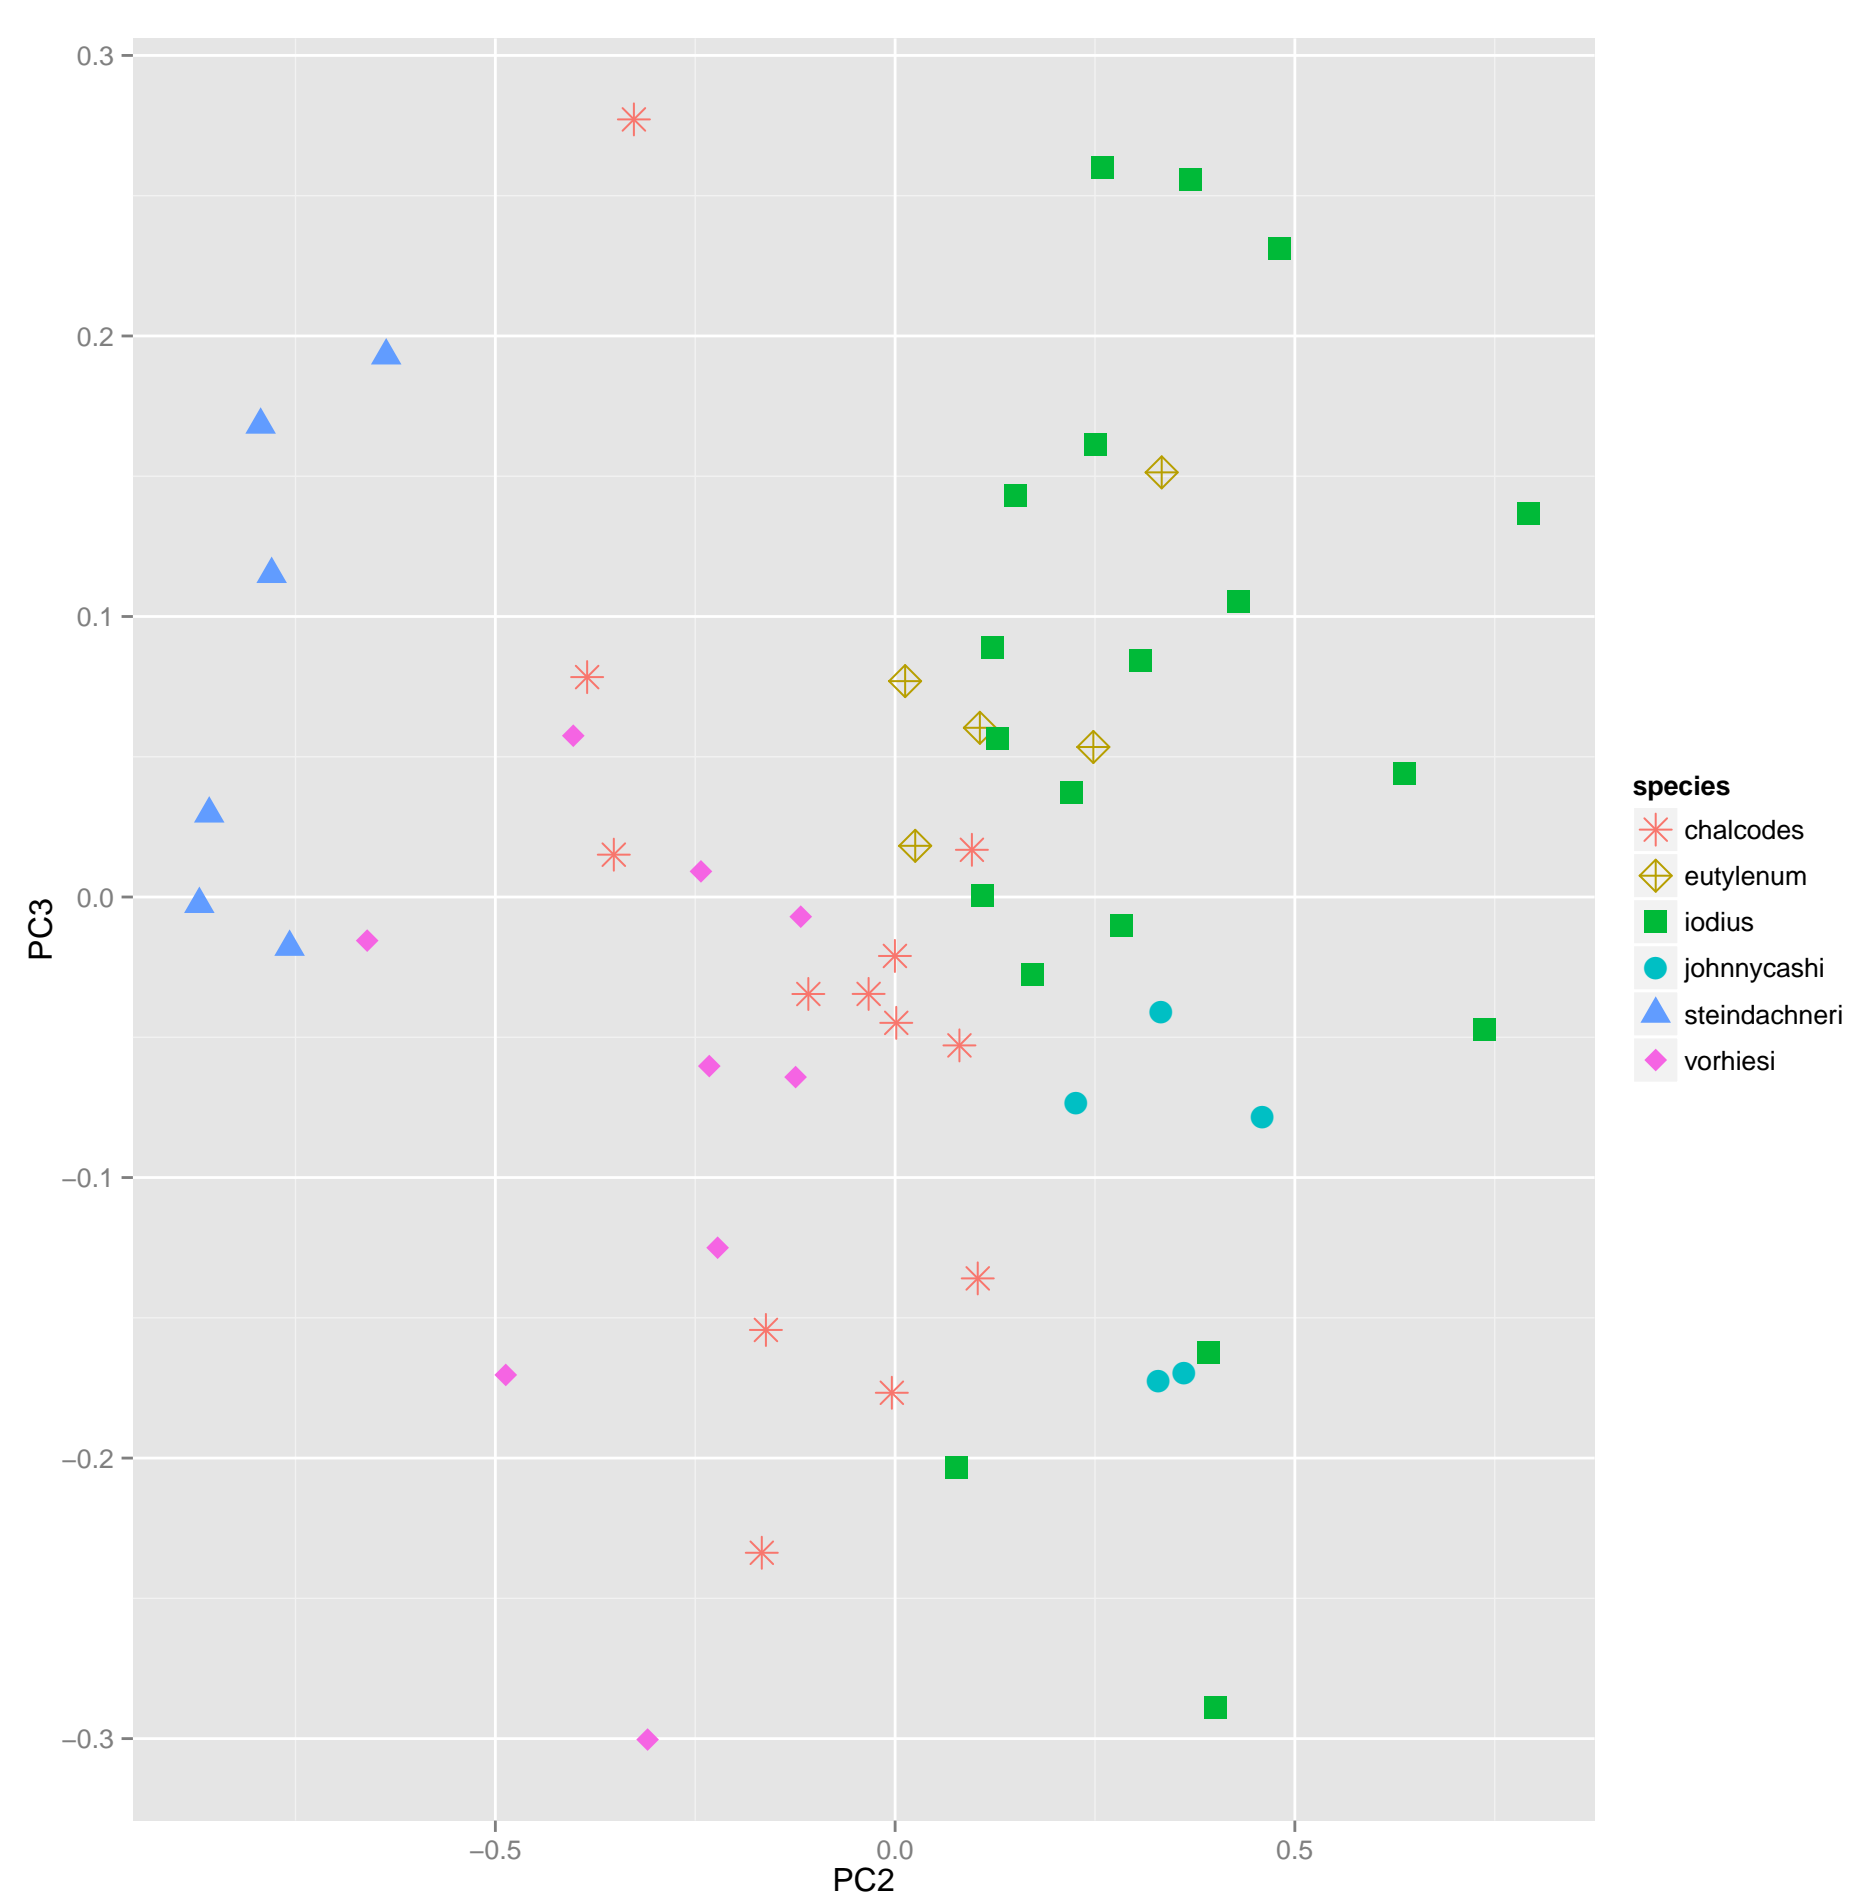

Supplement: Supplementary file 228

## Patella 1/Tarsus 4 Length ratio – females

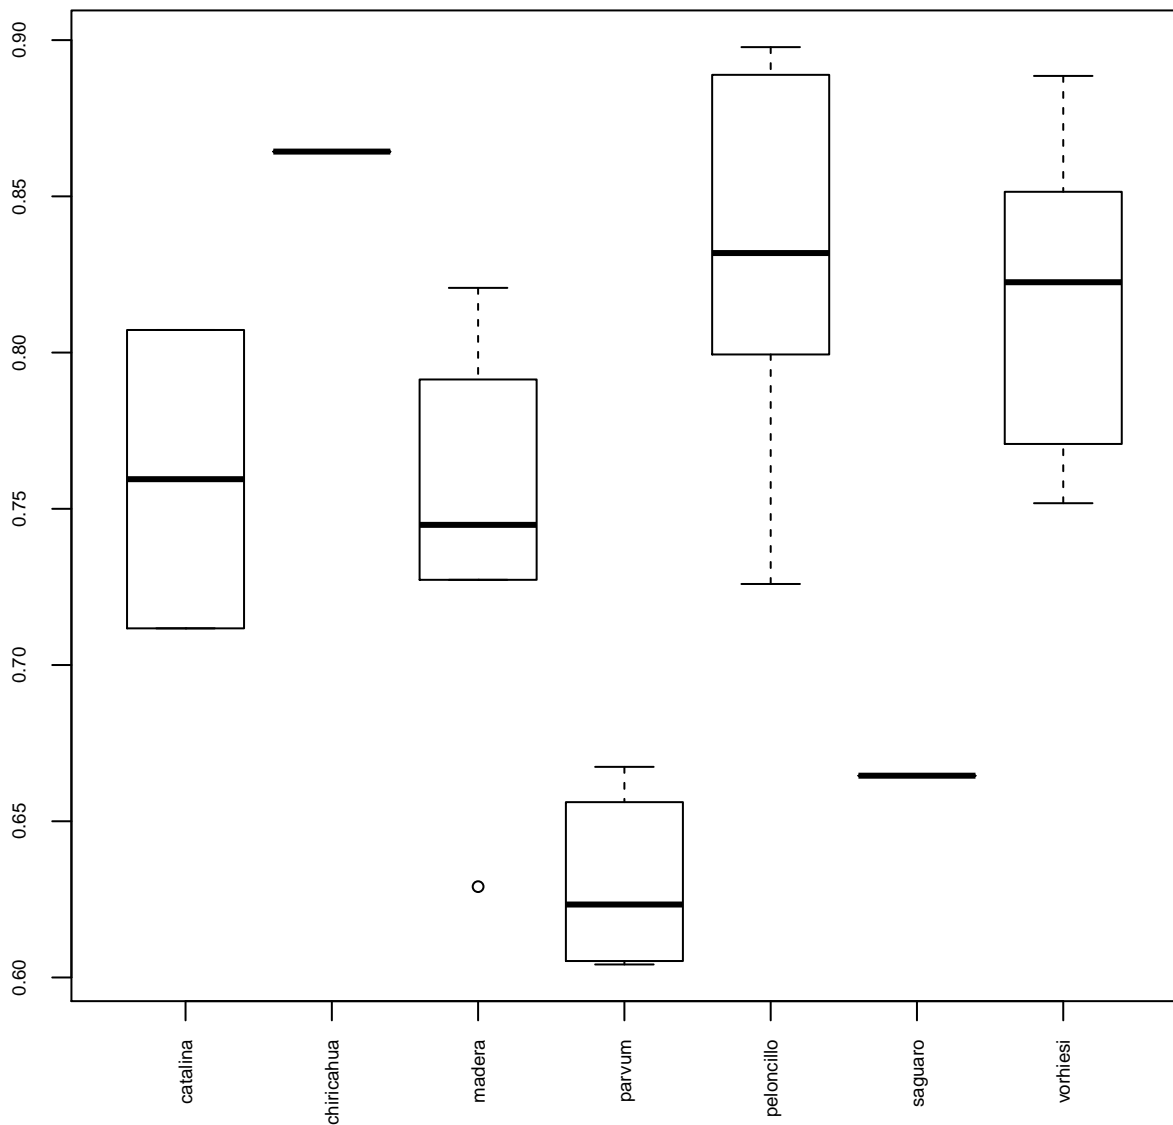

Supplement: Supplementary file 229

## Femur 1/Tibia 3 ratio – males

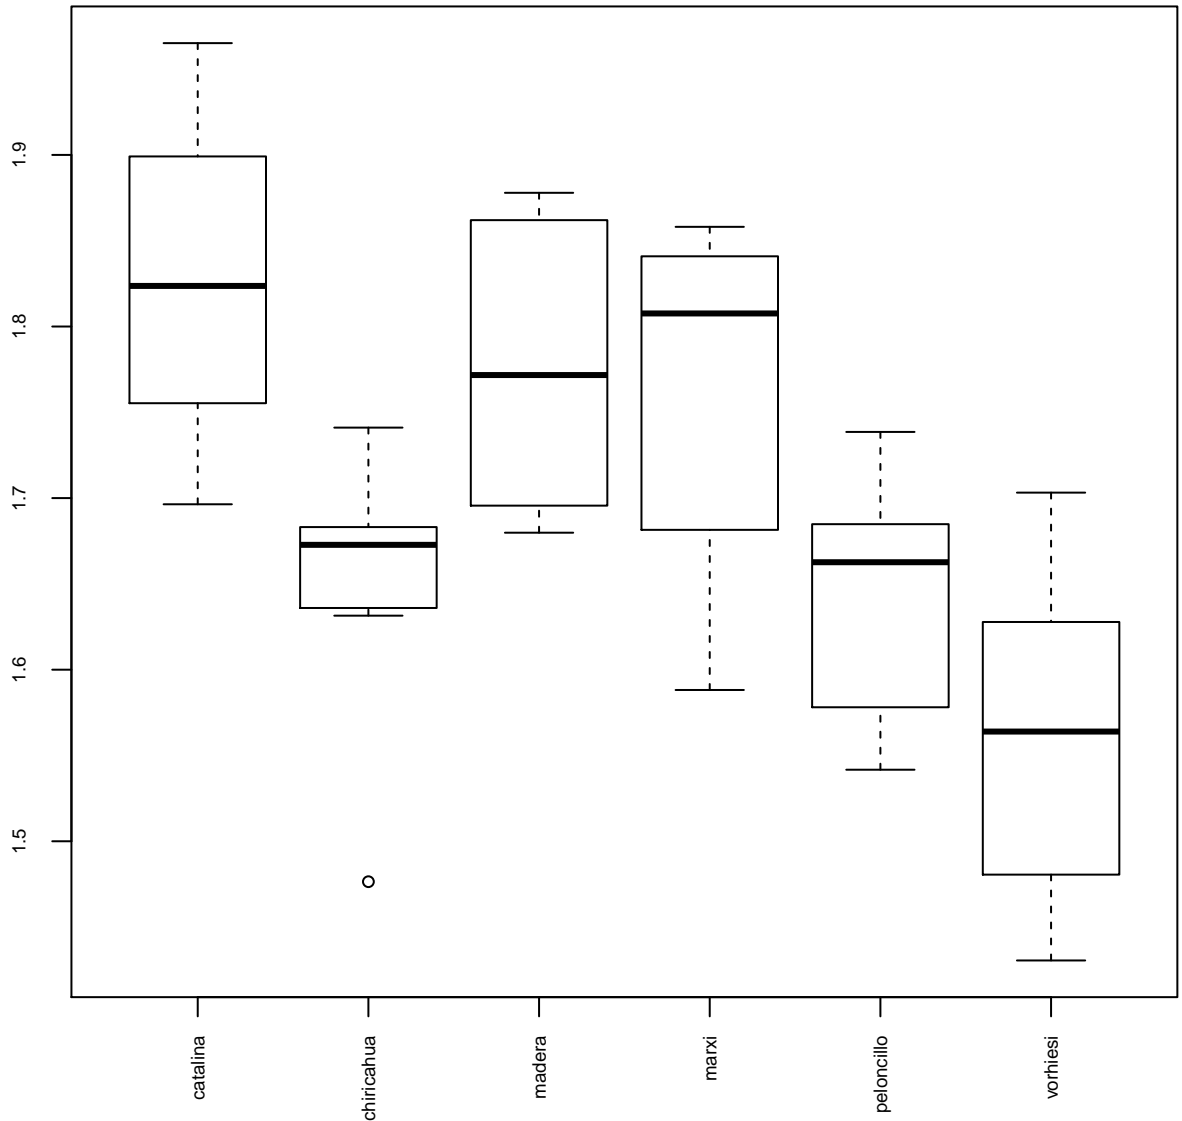

Supplement: Supplementary file 230

## Patella 1/Tibia 3 Length ratio – females

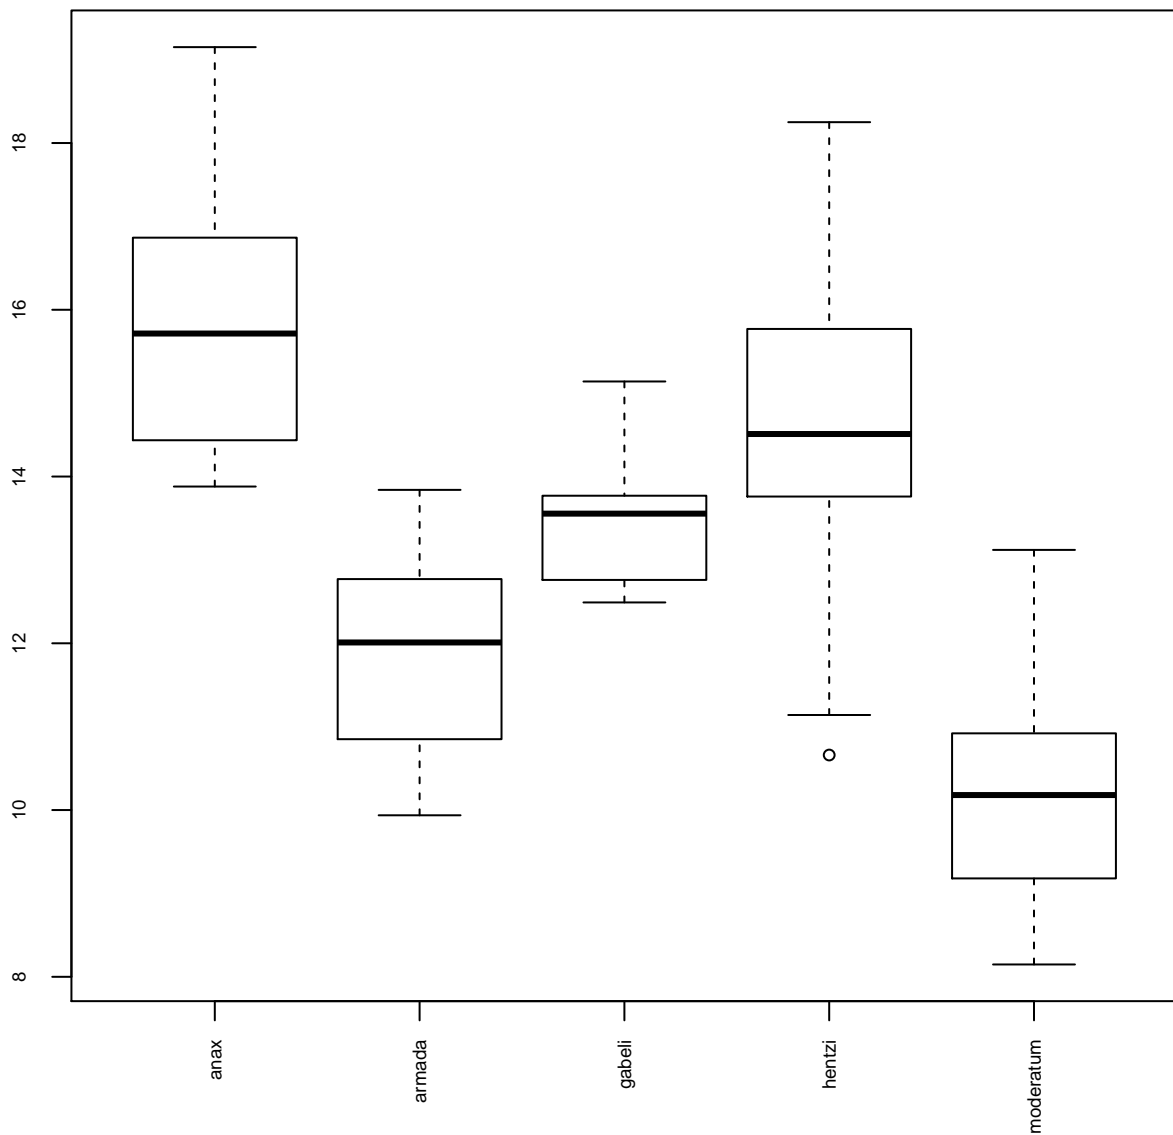

Supplement: Supplementary file 231

## Tibia 1/Tarsus 3 Length ratio – males

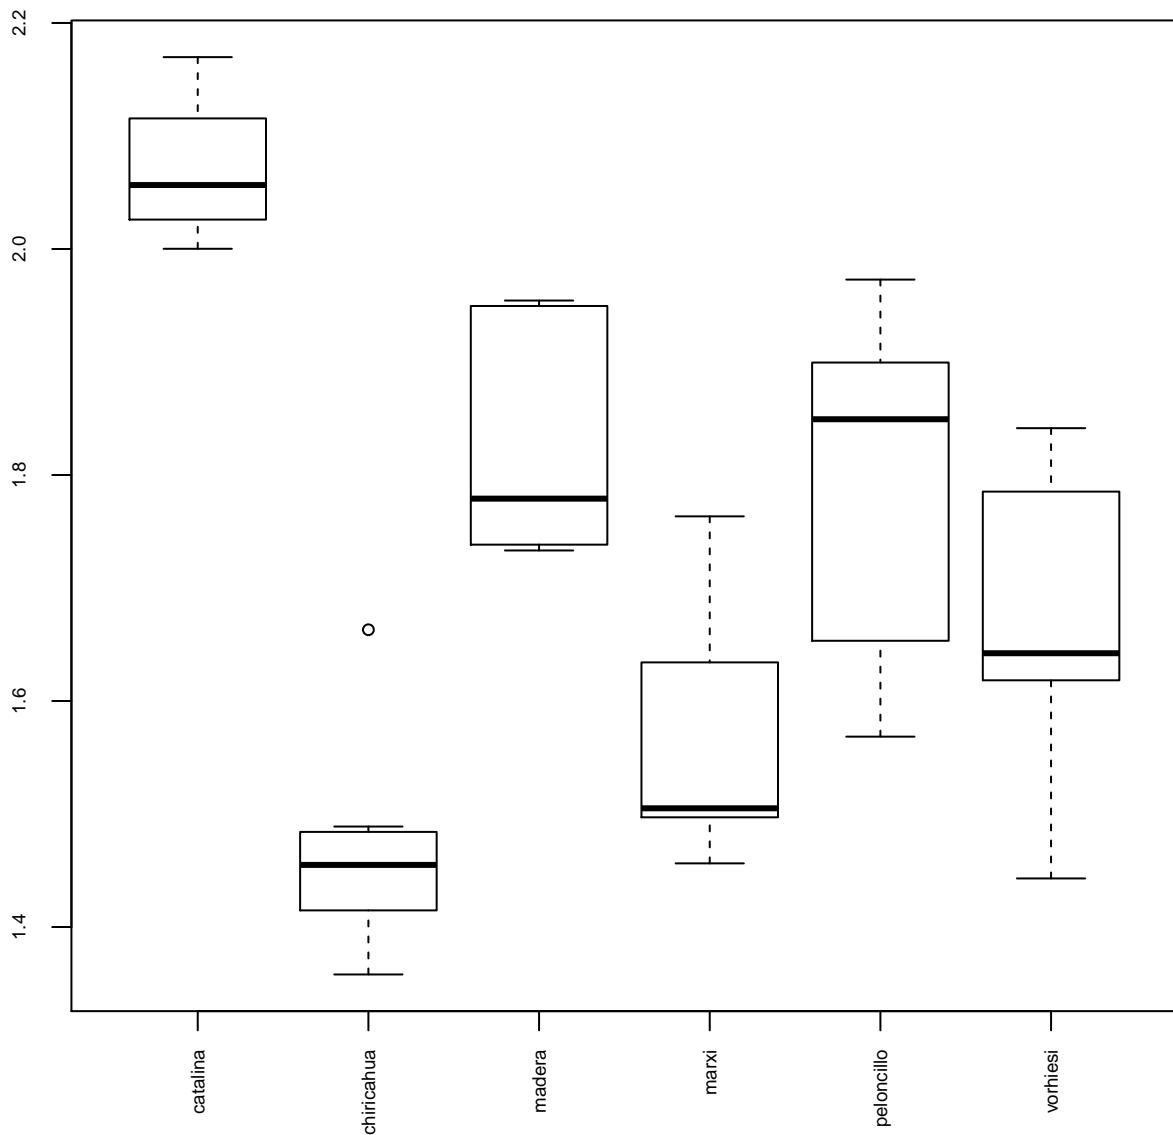

Supplement: Supplementary file 232

# Tibia 3/Tarsus 4 Length ratio – males

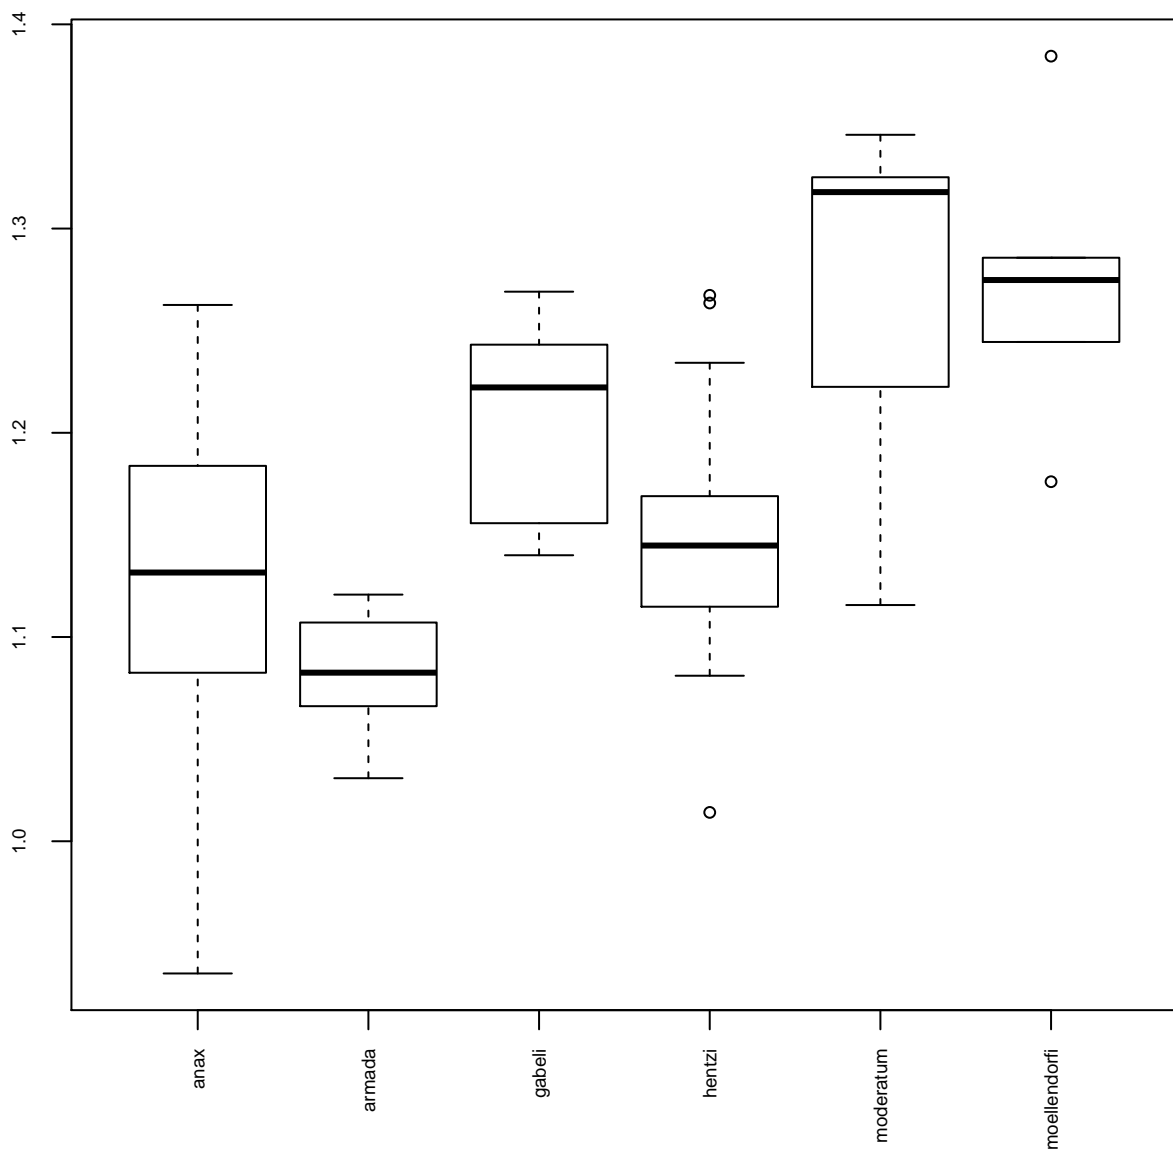

Supplement: Supplementary file 233

## Patella 3/Tibia 4 Length ratio – females

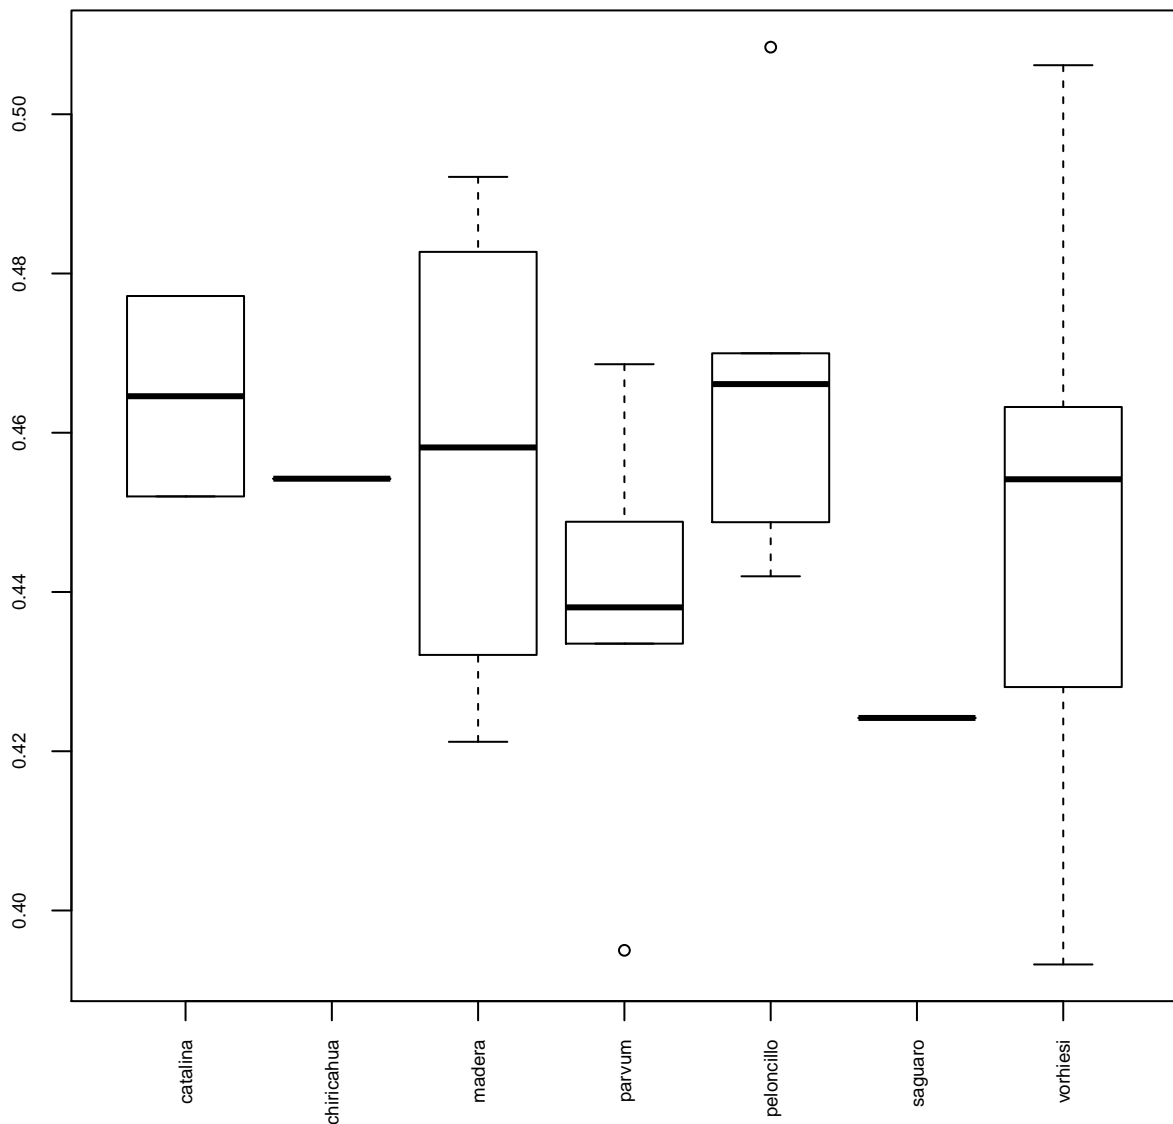

Supplement: Supplementary file 234

## Leg 4 Length/Carapace Length ratio – males

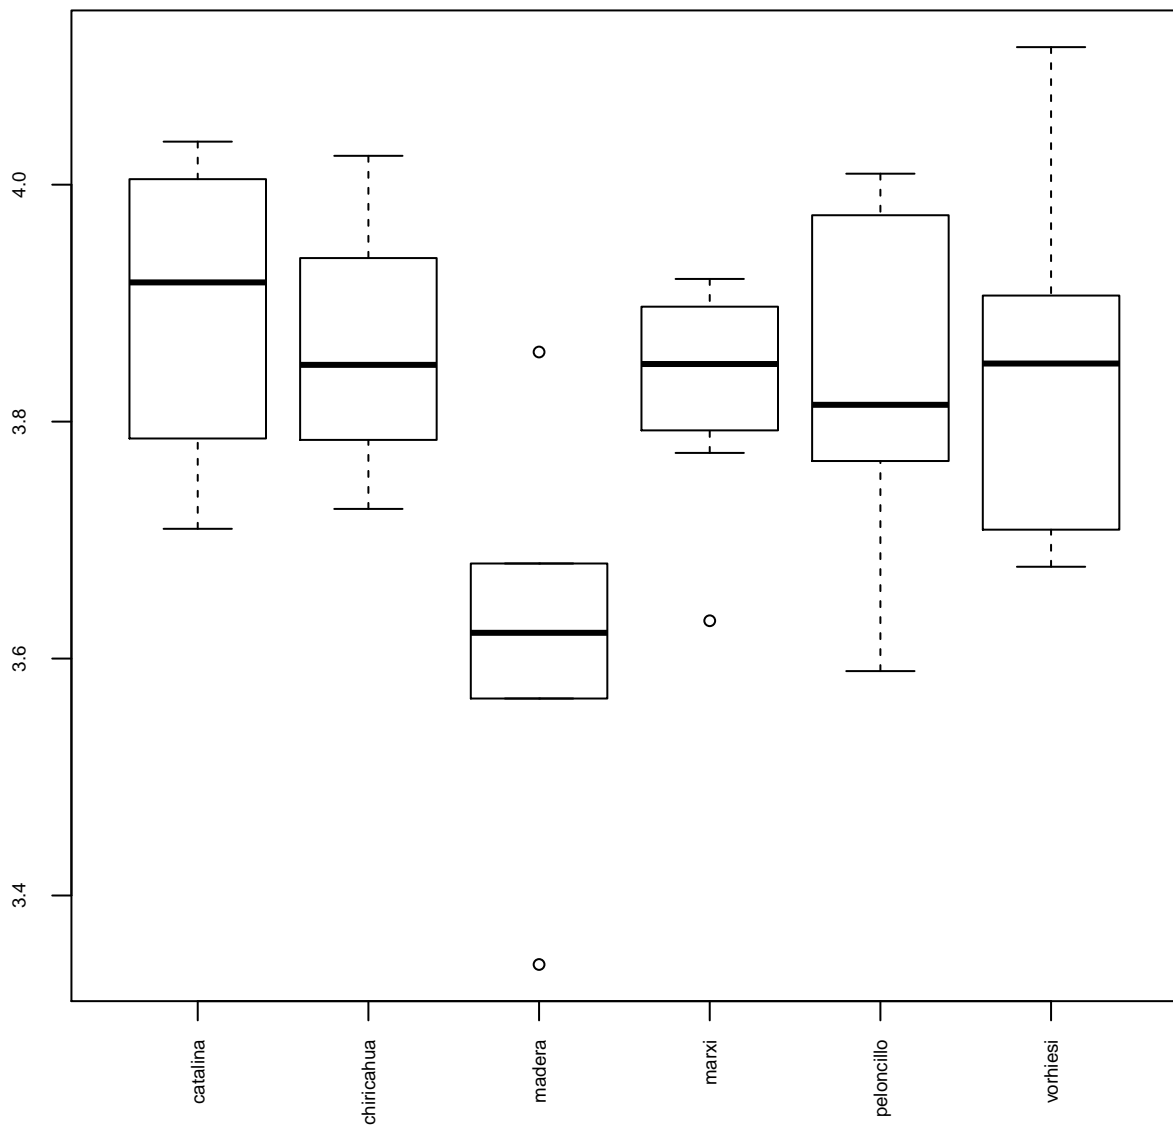

Supplement: Supplementary file 235

# Tibia 1/Metatarsus 4 Length ratio – females

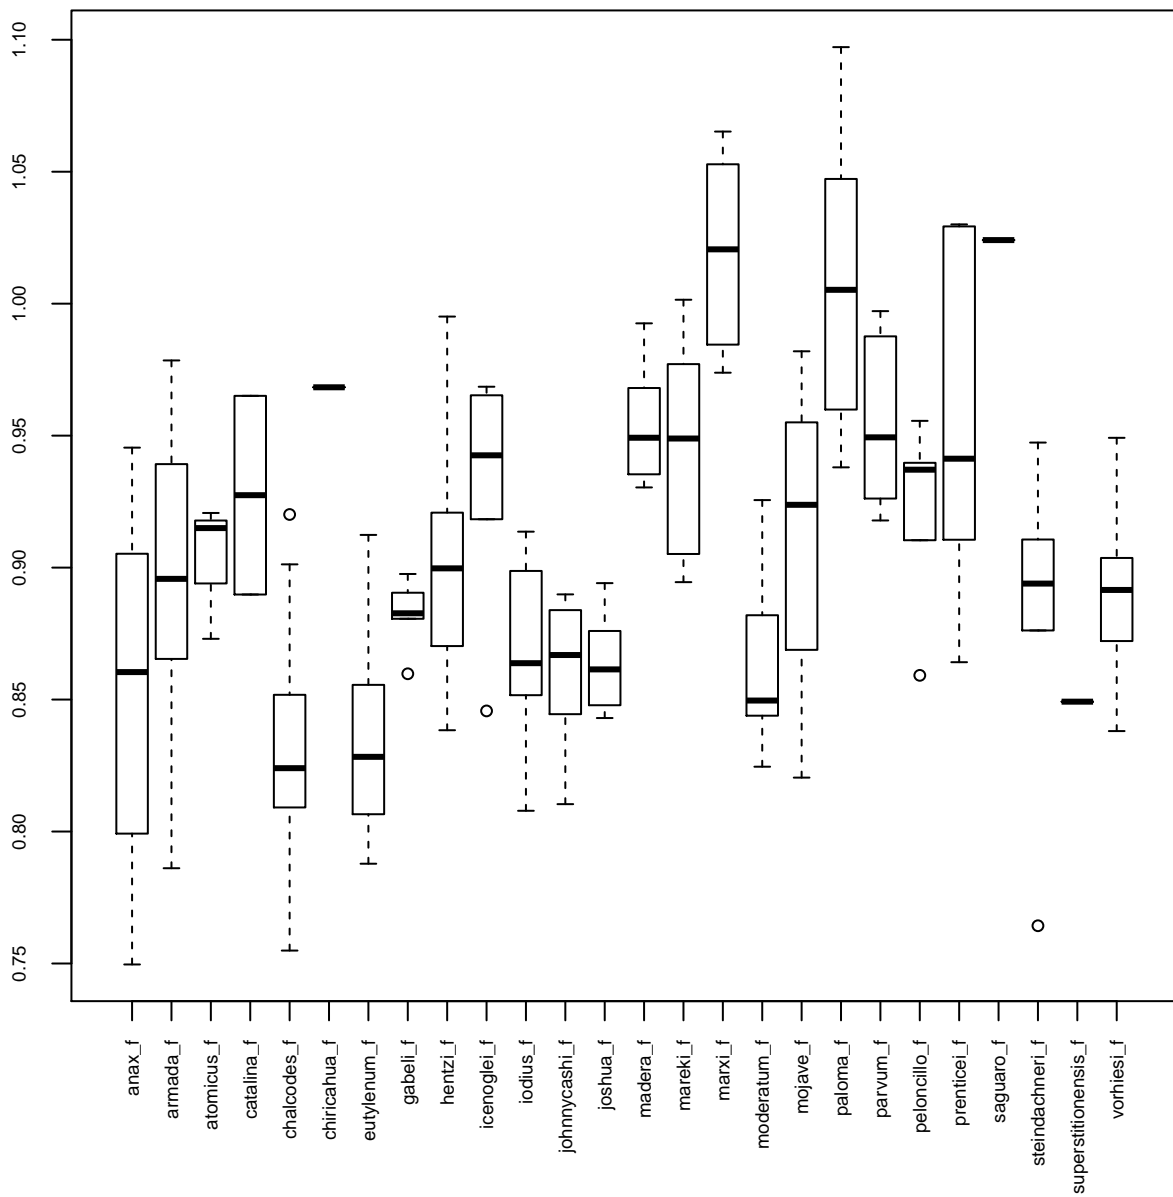

Supplement: Supplementary file 236

## Tibia 1/Patella 3 Length ratio – females

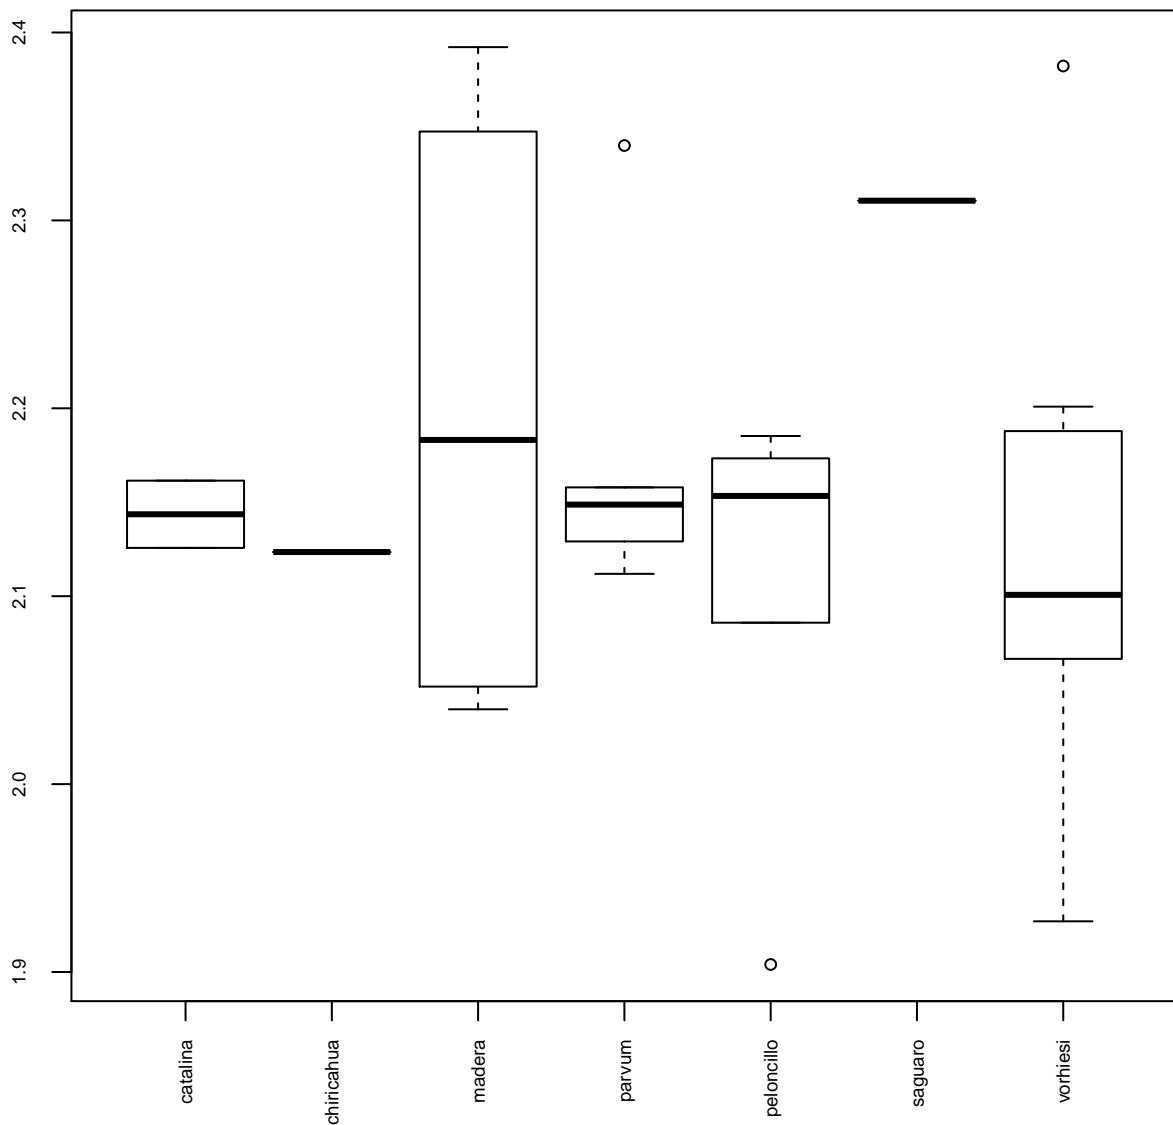

Supplement: Supplementary file 237

# Patella 1/Femur 4 Length ratio – males

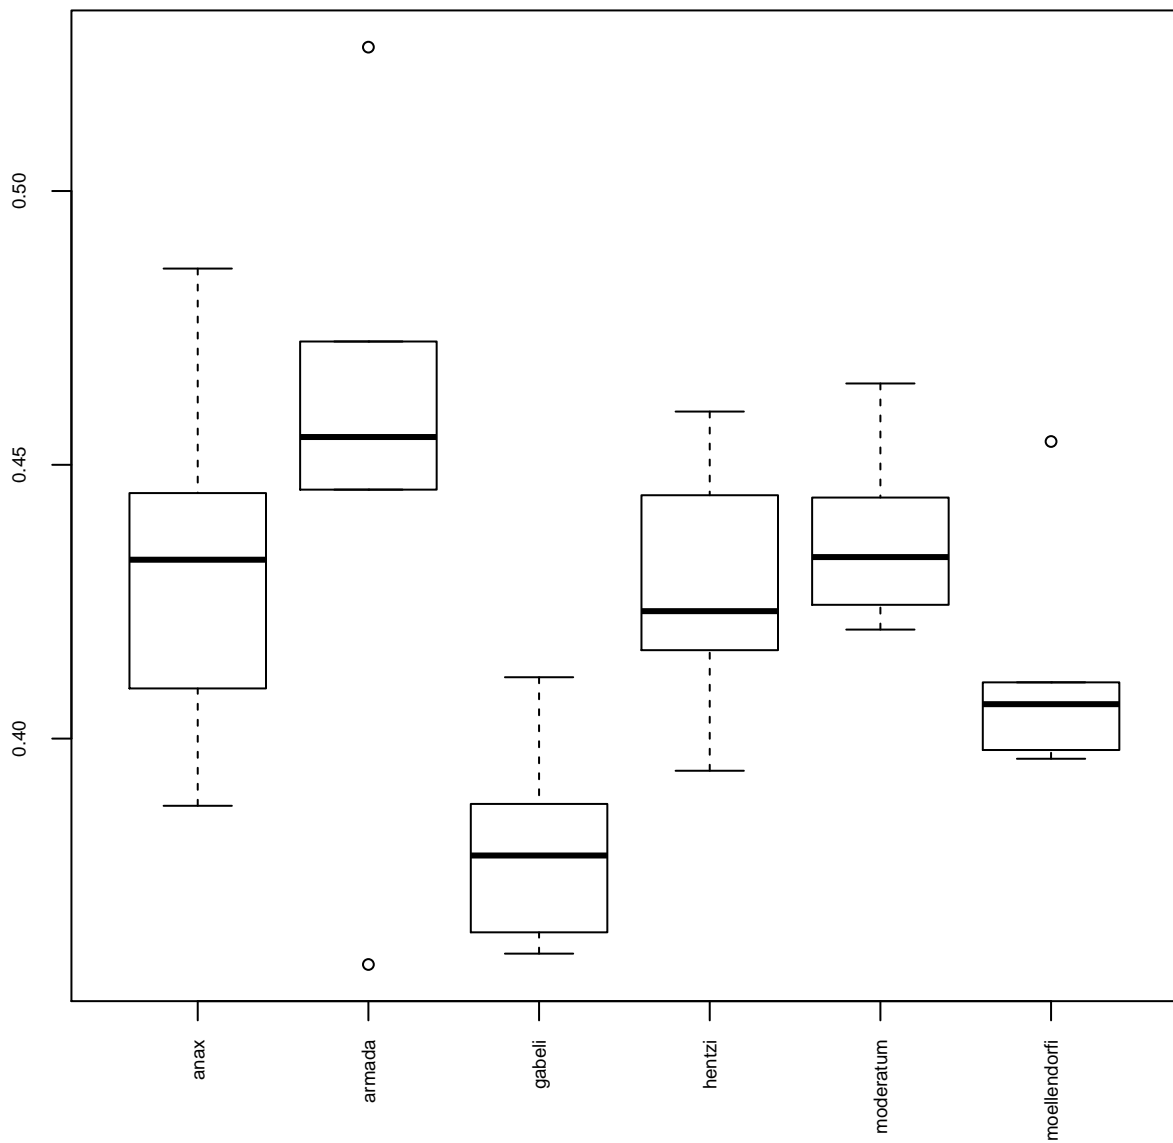

Supplement: Supplementary file 238

# Femur 1/Patella 1 ratio – females

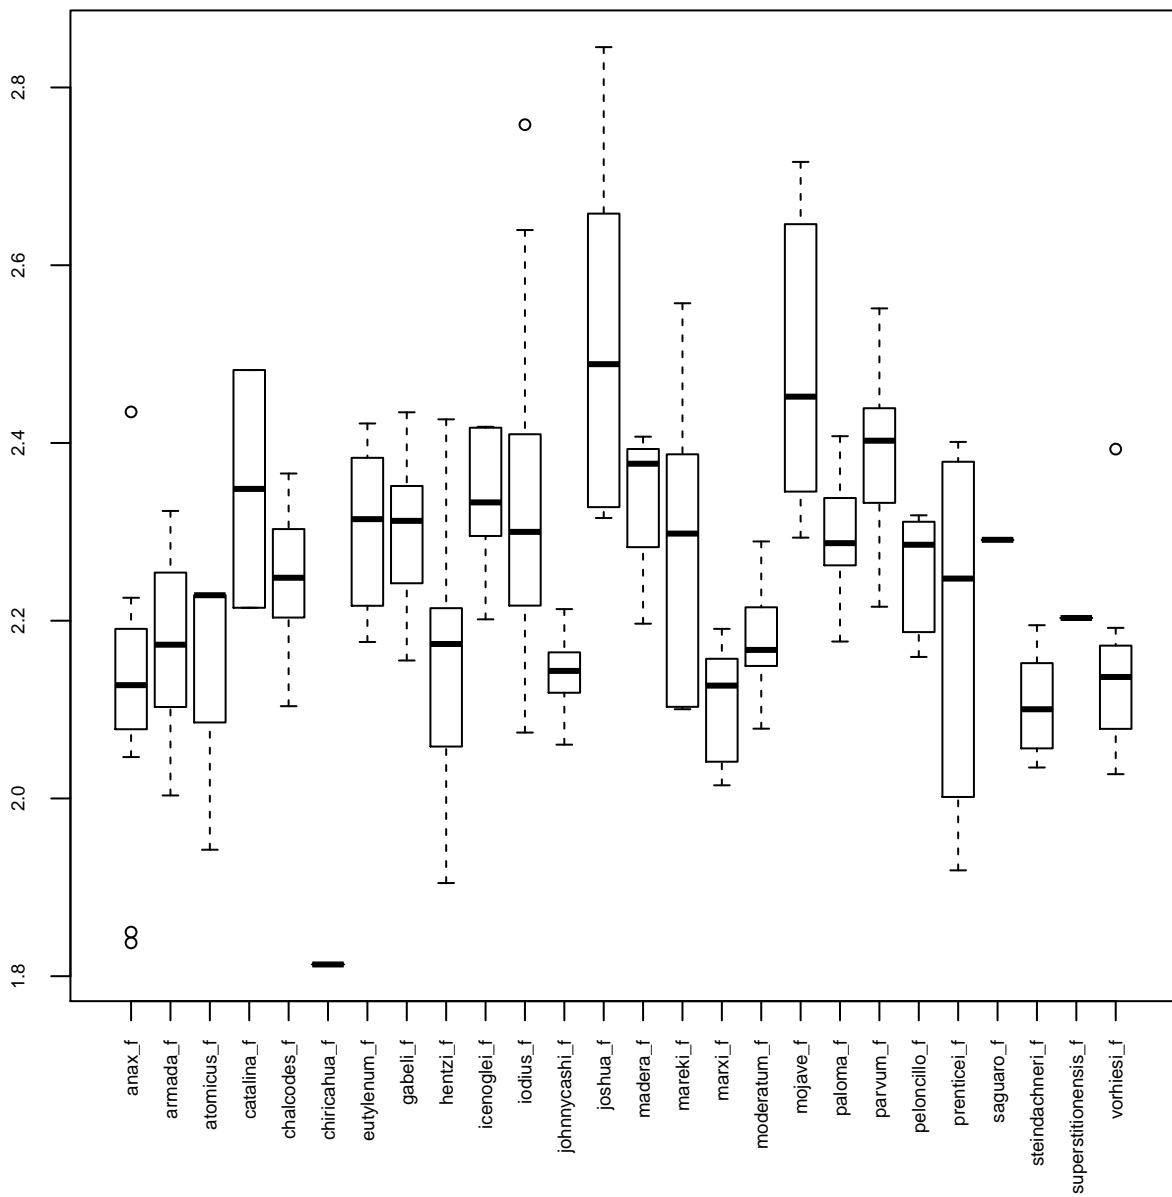

Supplement: Supplementary file 239

# Carapace Length/Metatarsus 1 ratio – females

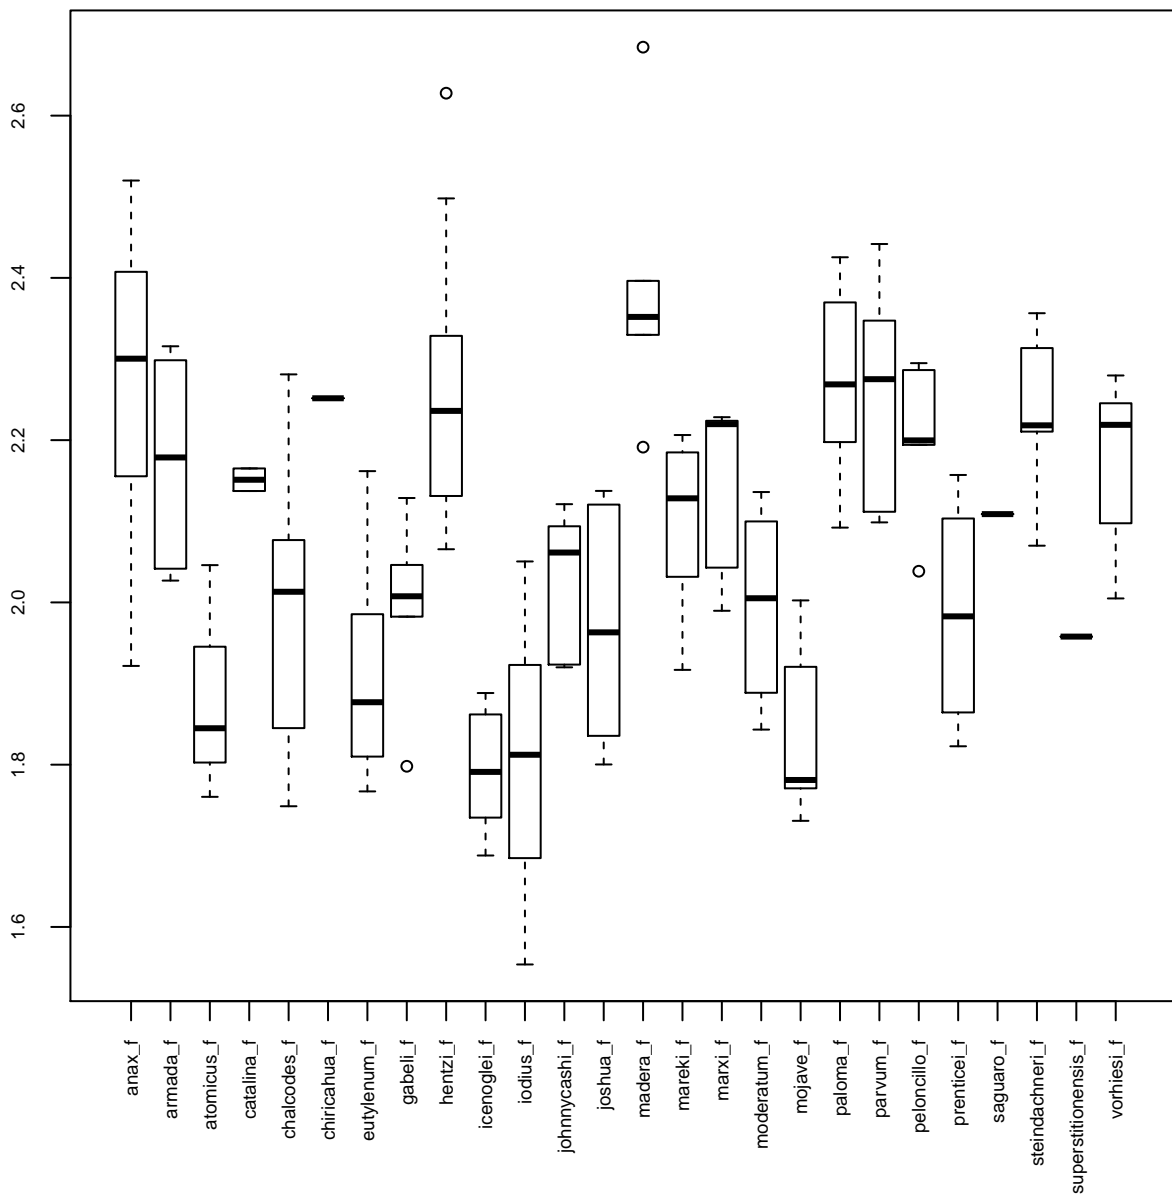

Supplement: Supplementary file 240

## Tibia 3/Femur 4 Length ratio – females

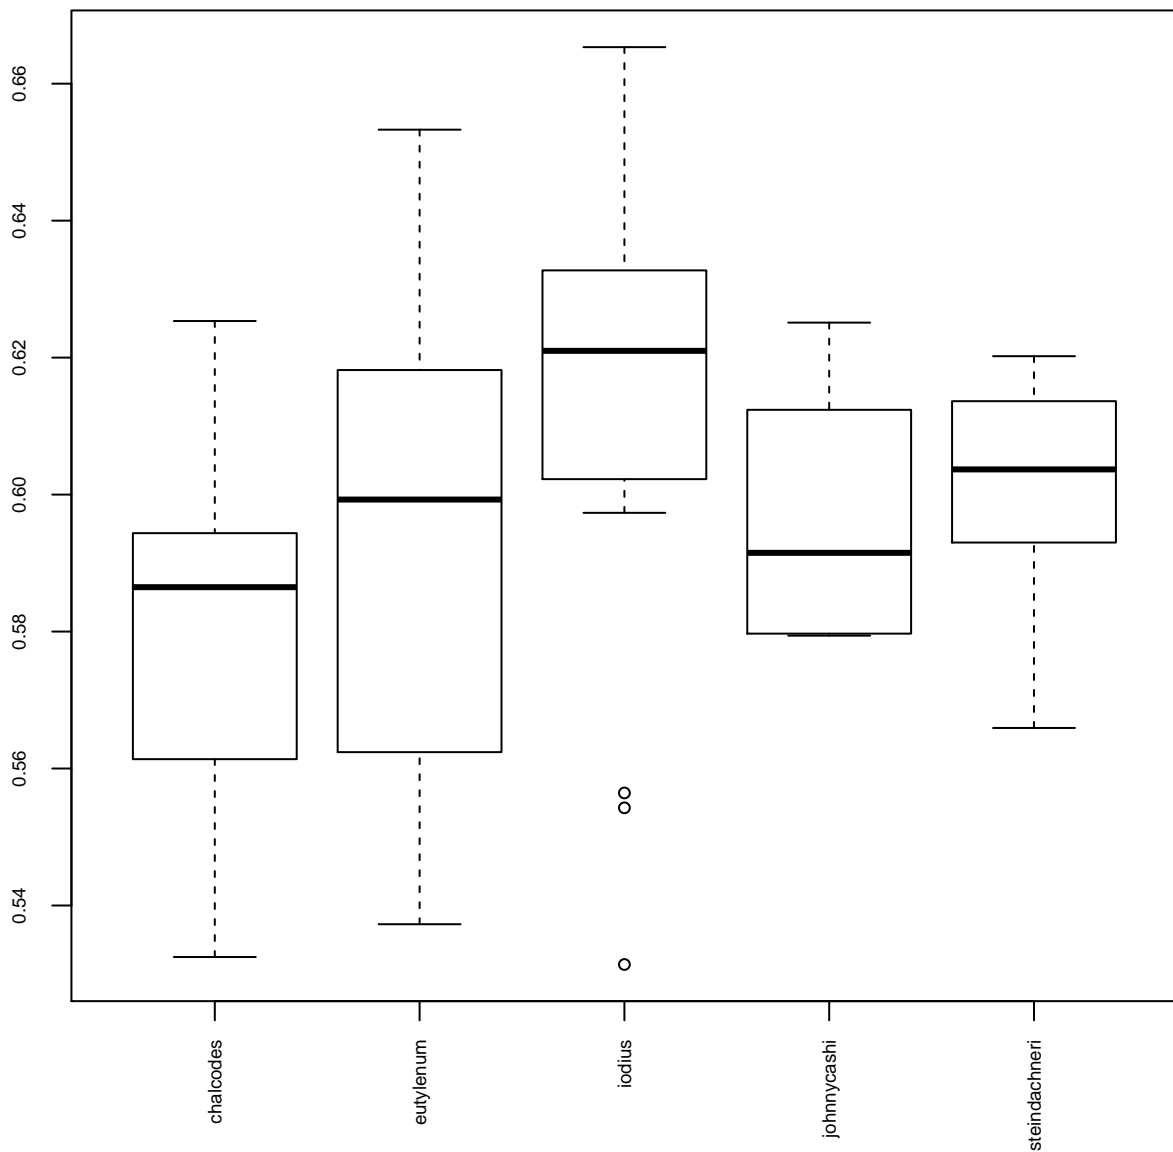

Supplement: Supplementary file 241

## Tibia 1/Patella 3 Length ratio – males

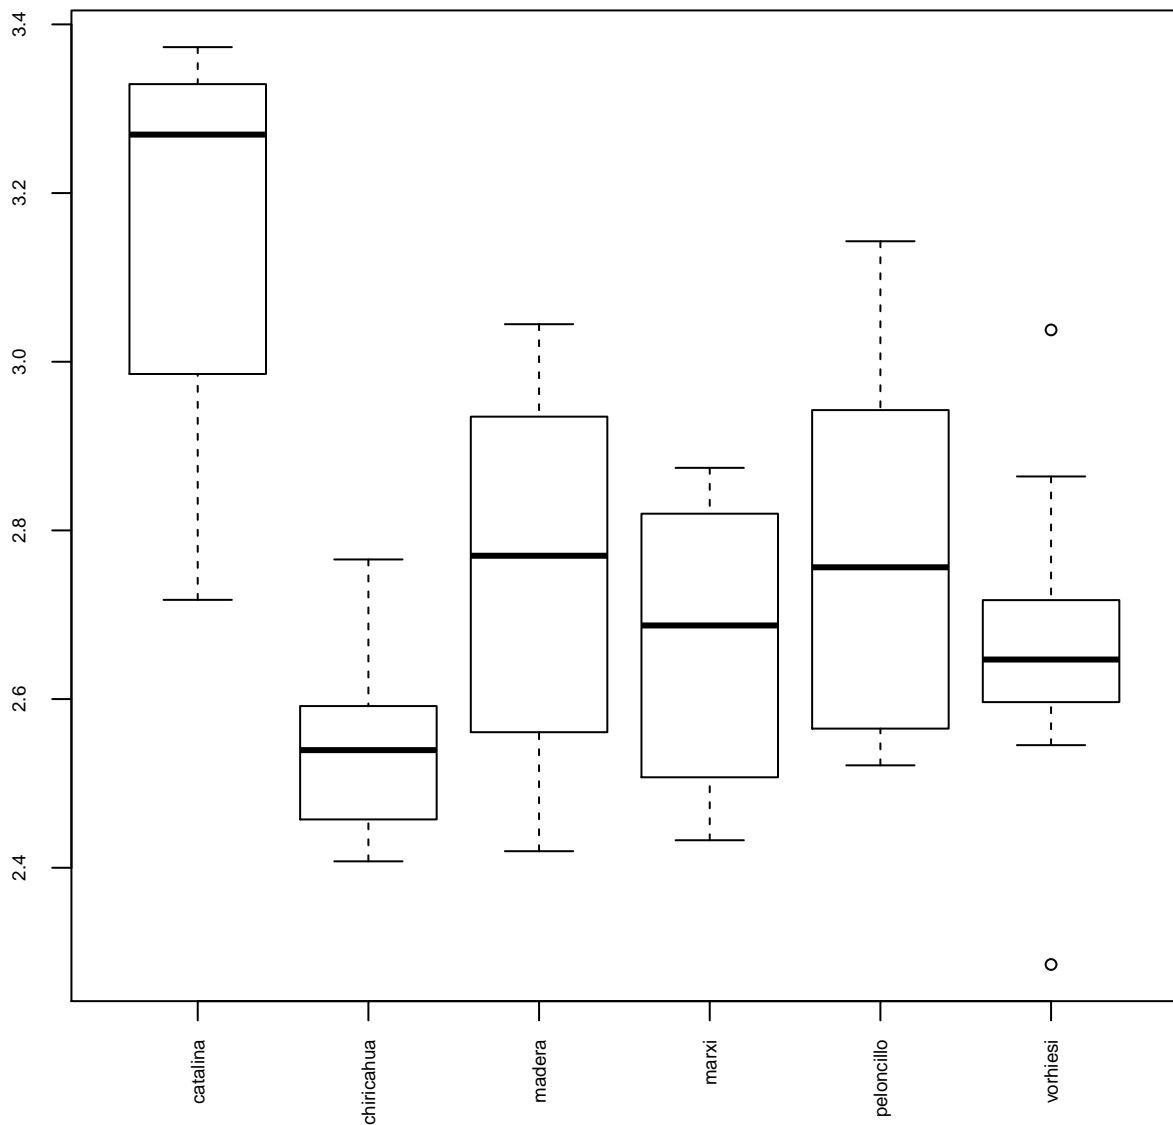

Supplement: Supplementary file 242

# Metatarsus 1/Tarsus 4 Length ratio – females

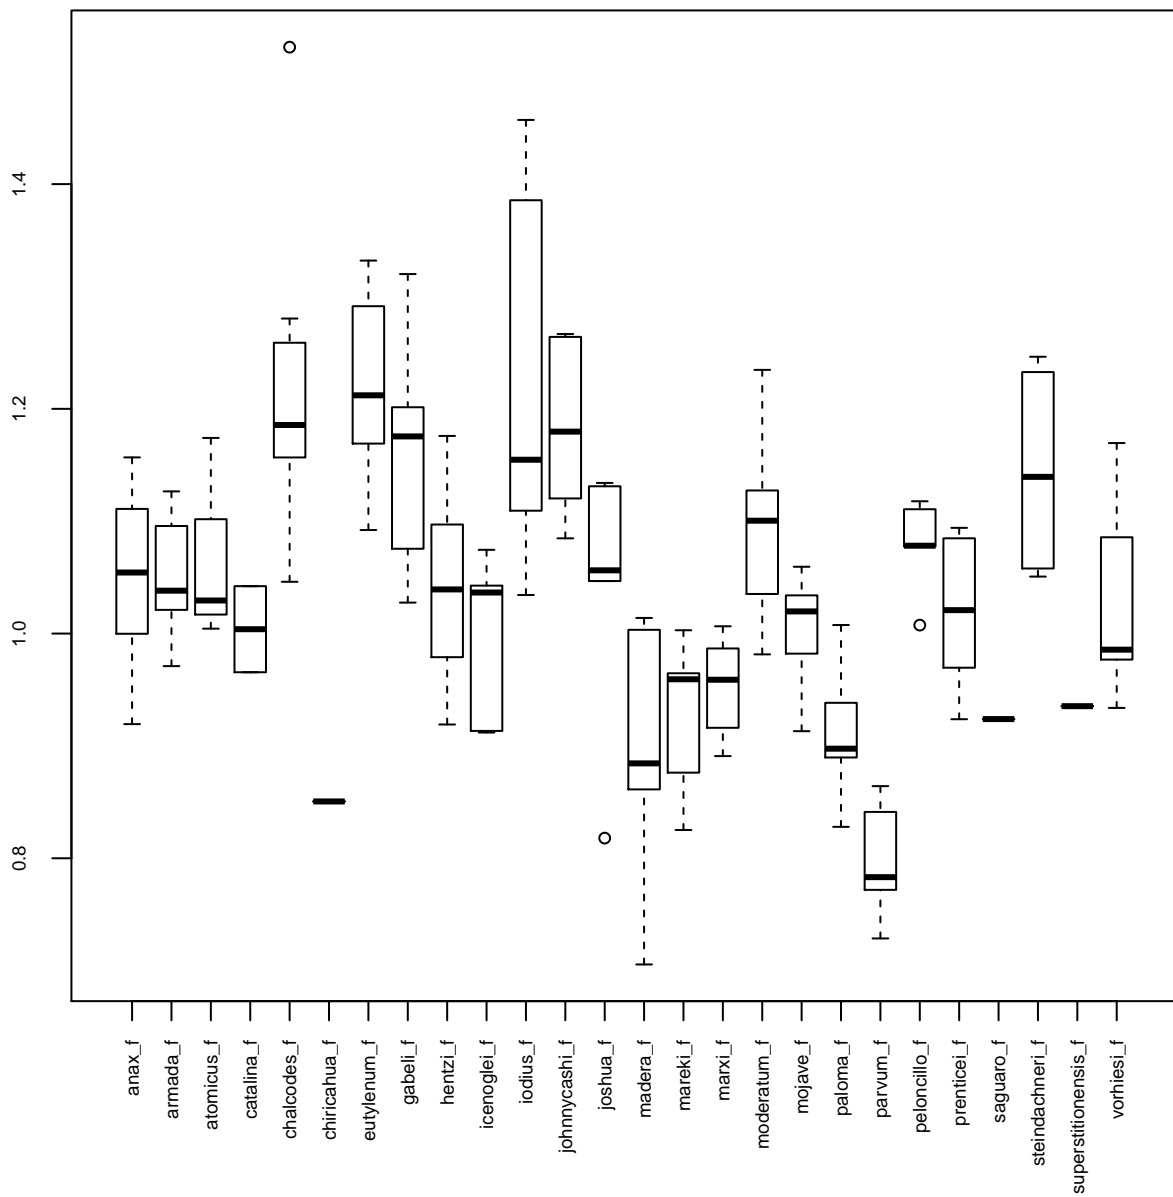

Supplement: Supplementary file 243

## Palpal Tibia/Tibia 4 Length ratio – males

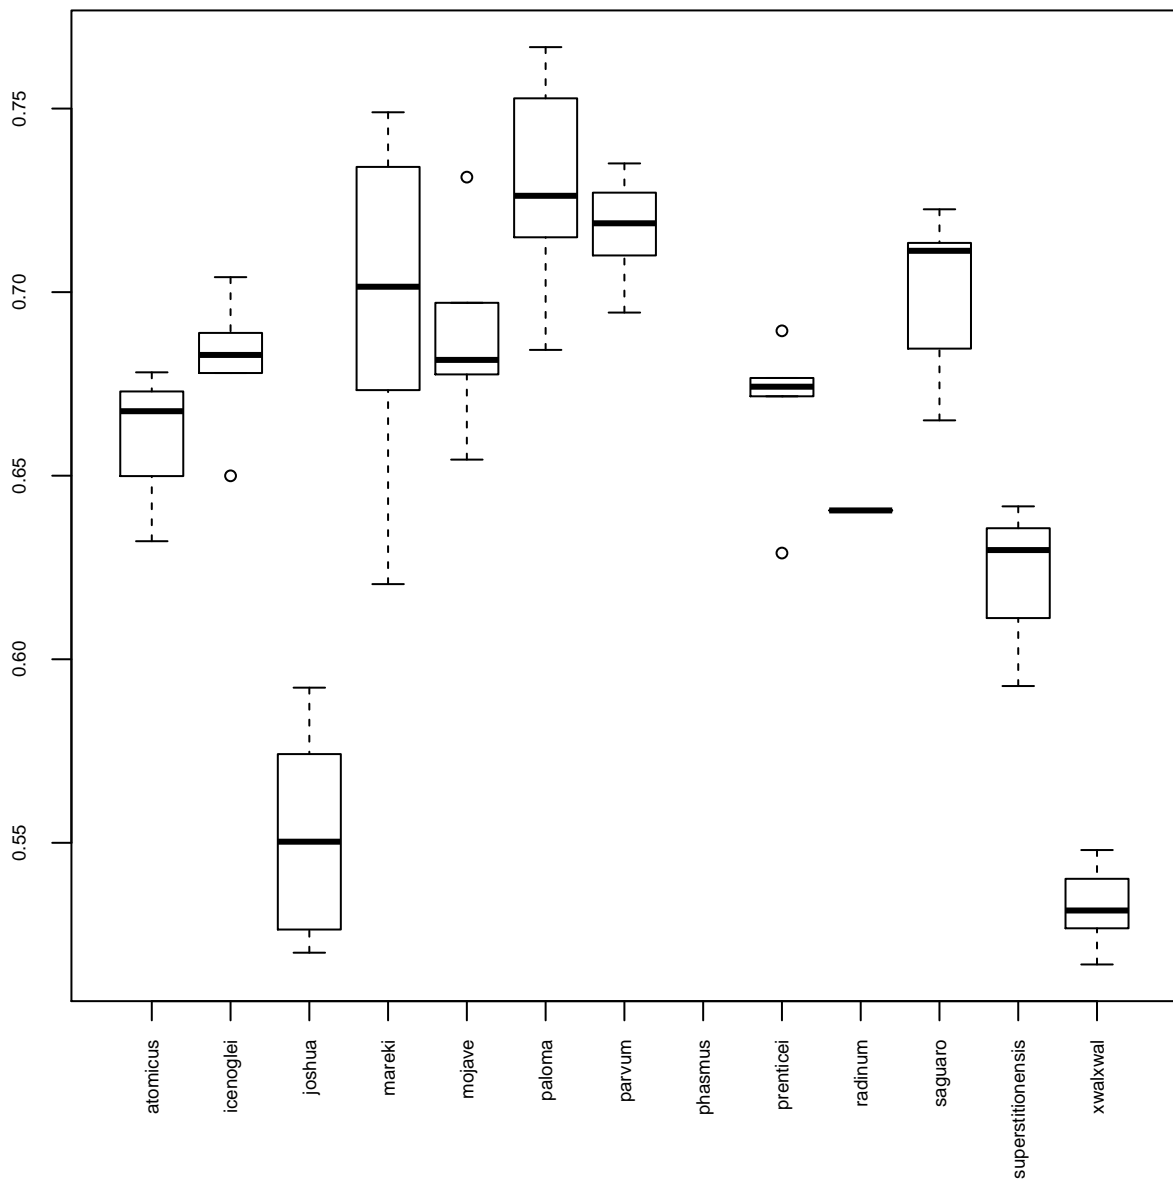

Supplement: Supplementary file 244

## Leg 3 Length – males

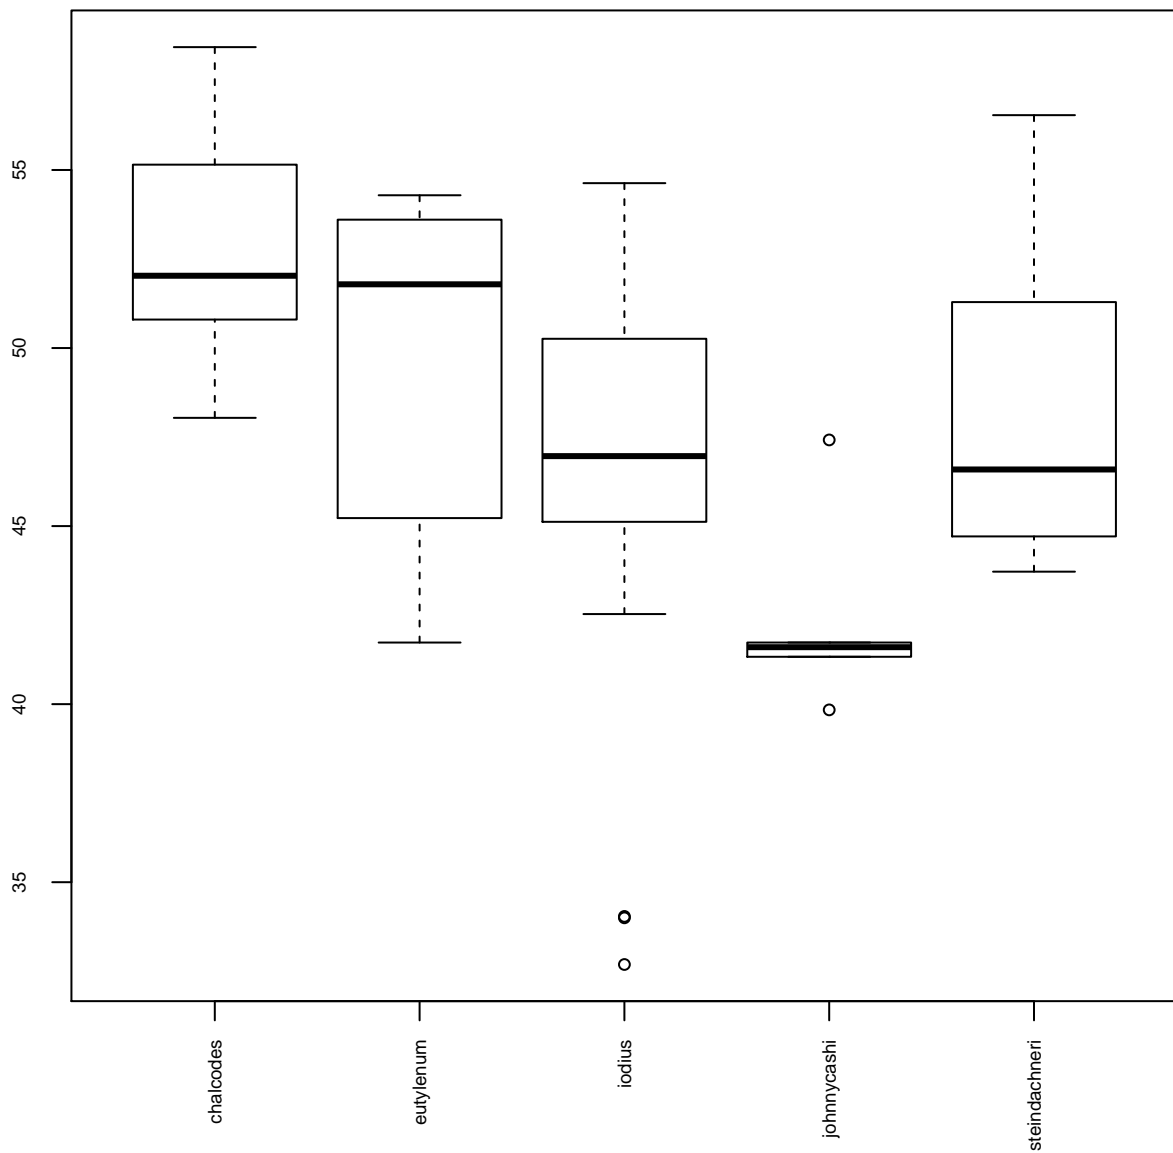

Supplement: Supplementary file 245

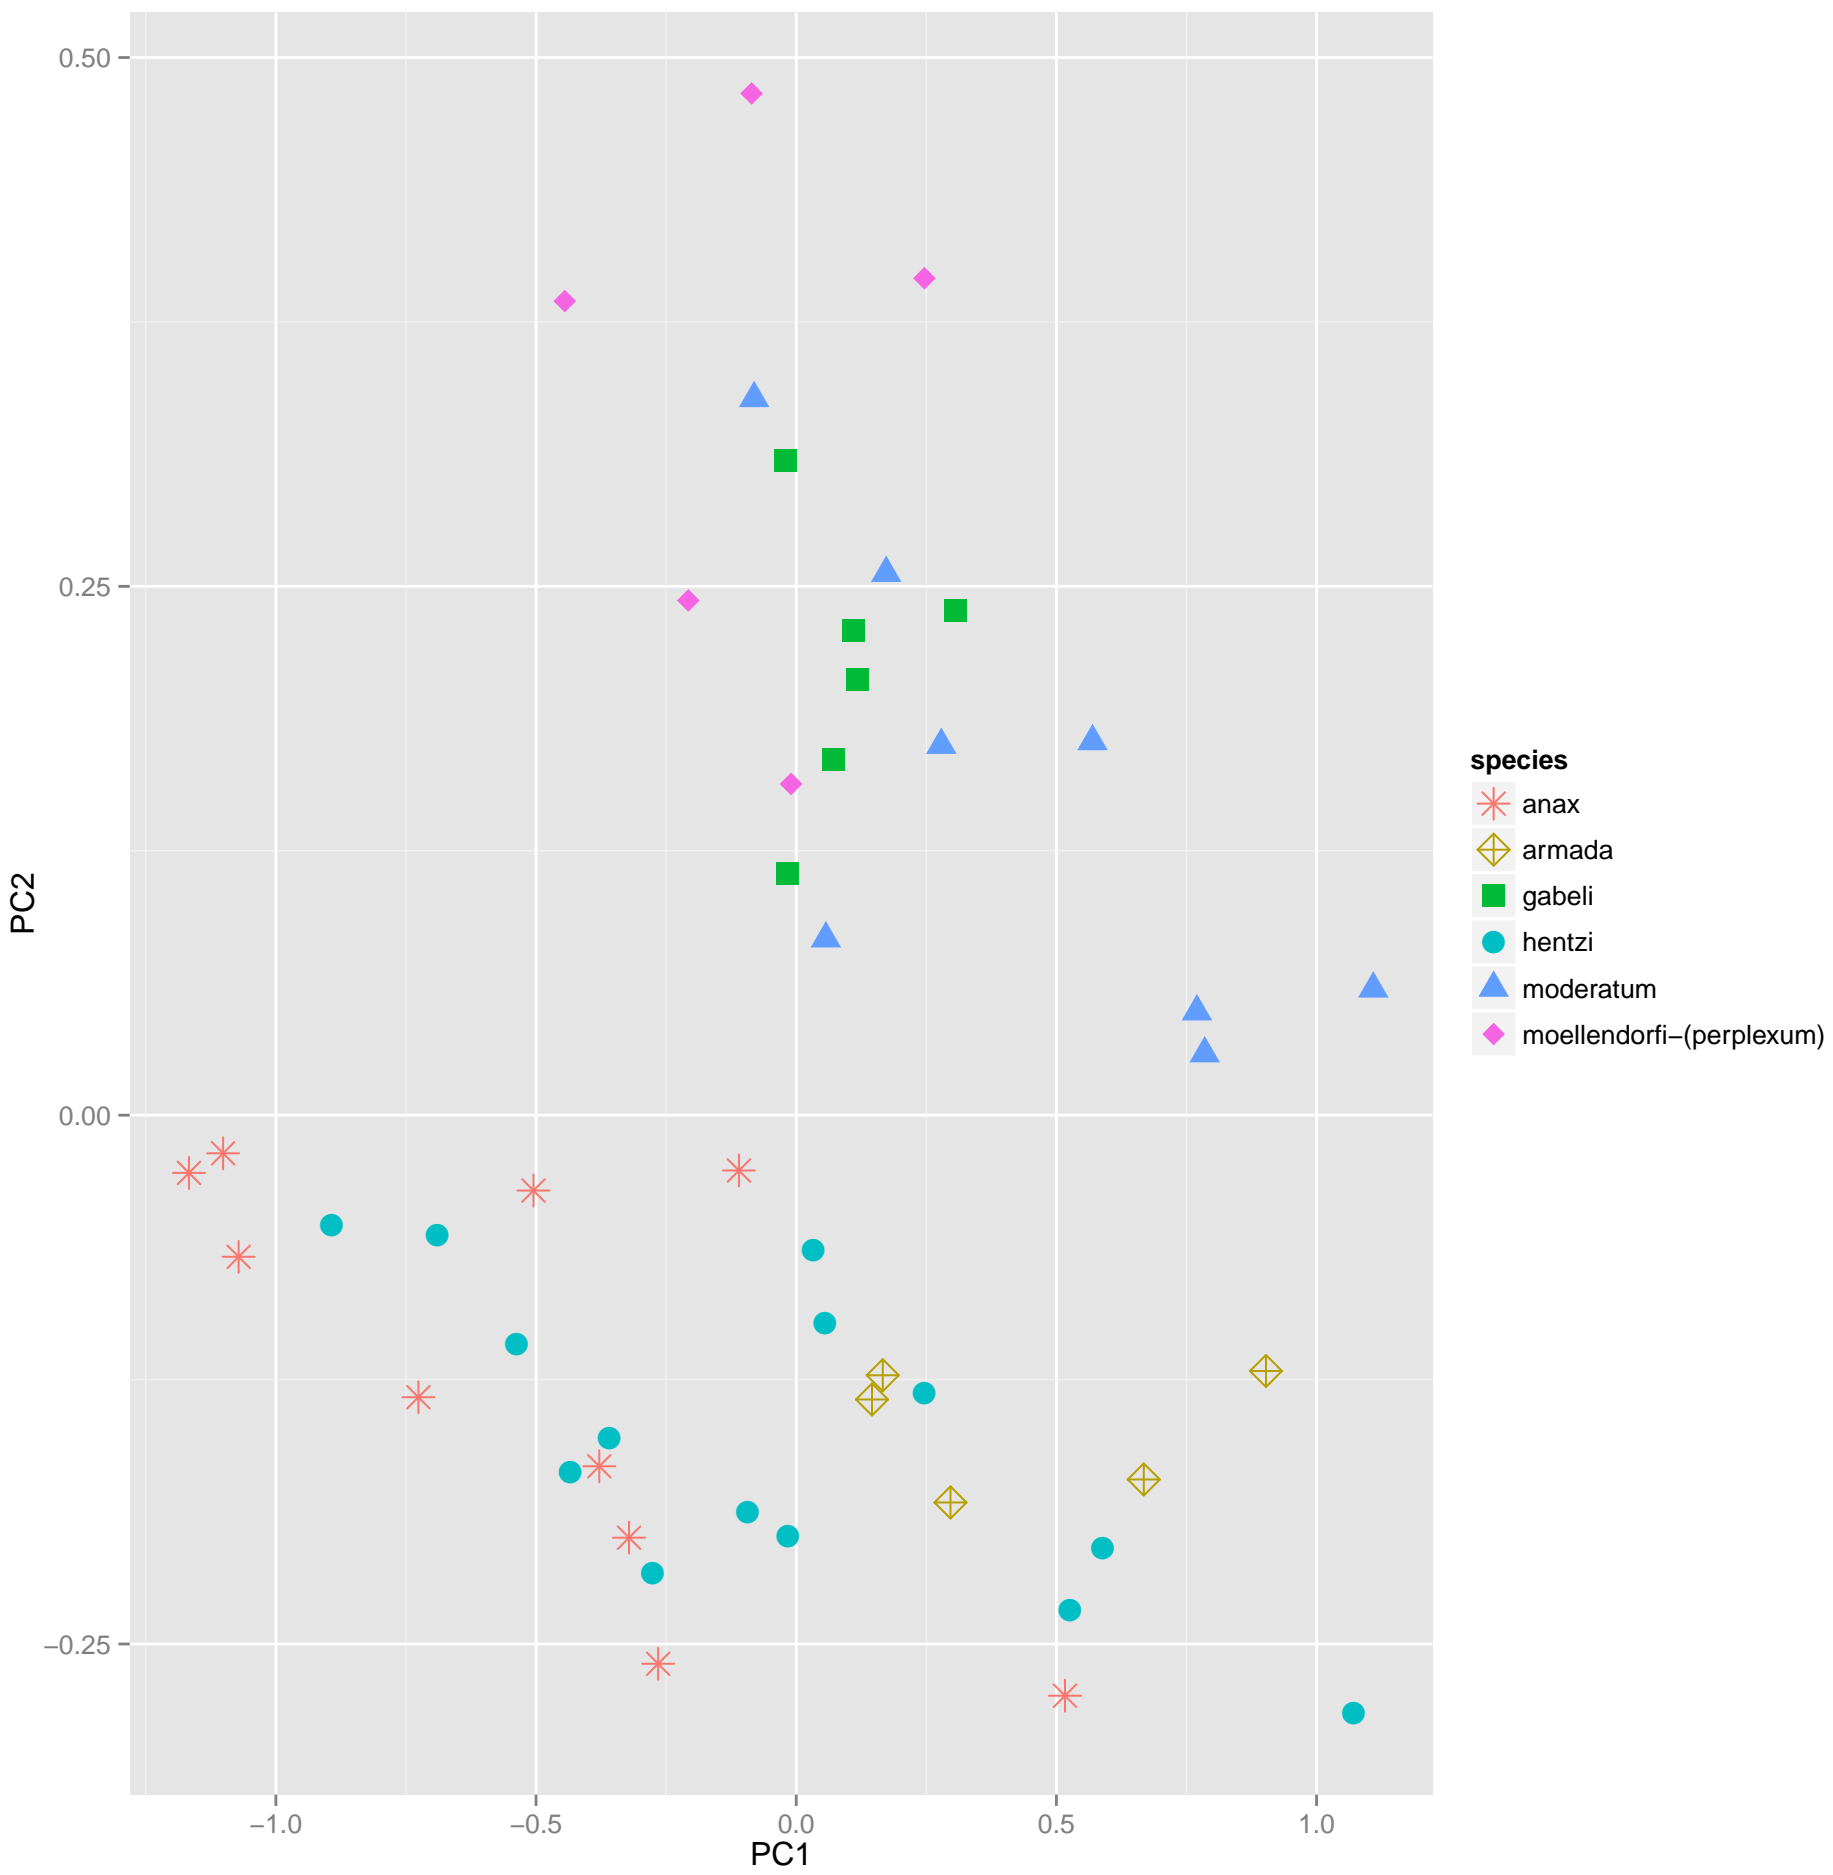

Supplement: Supplementary file 246

## Metatarsus 3/Tibia 4 Length ratio – females

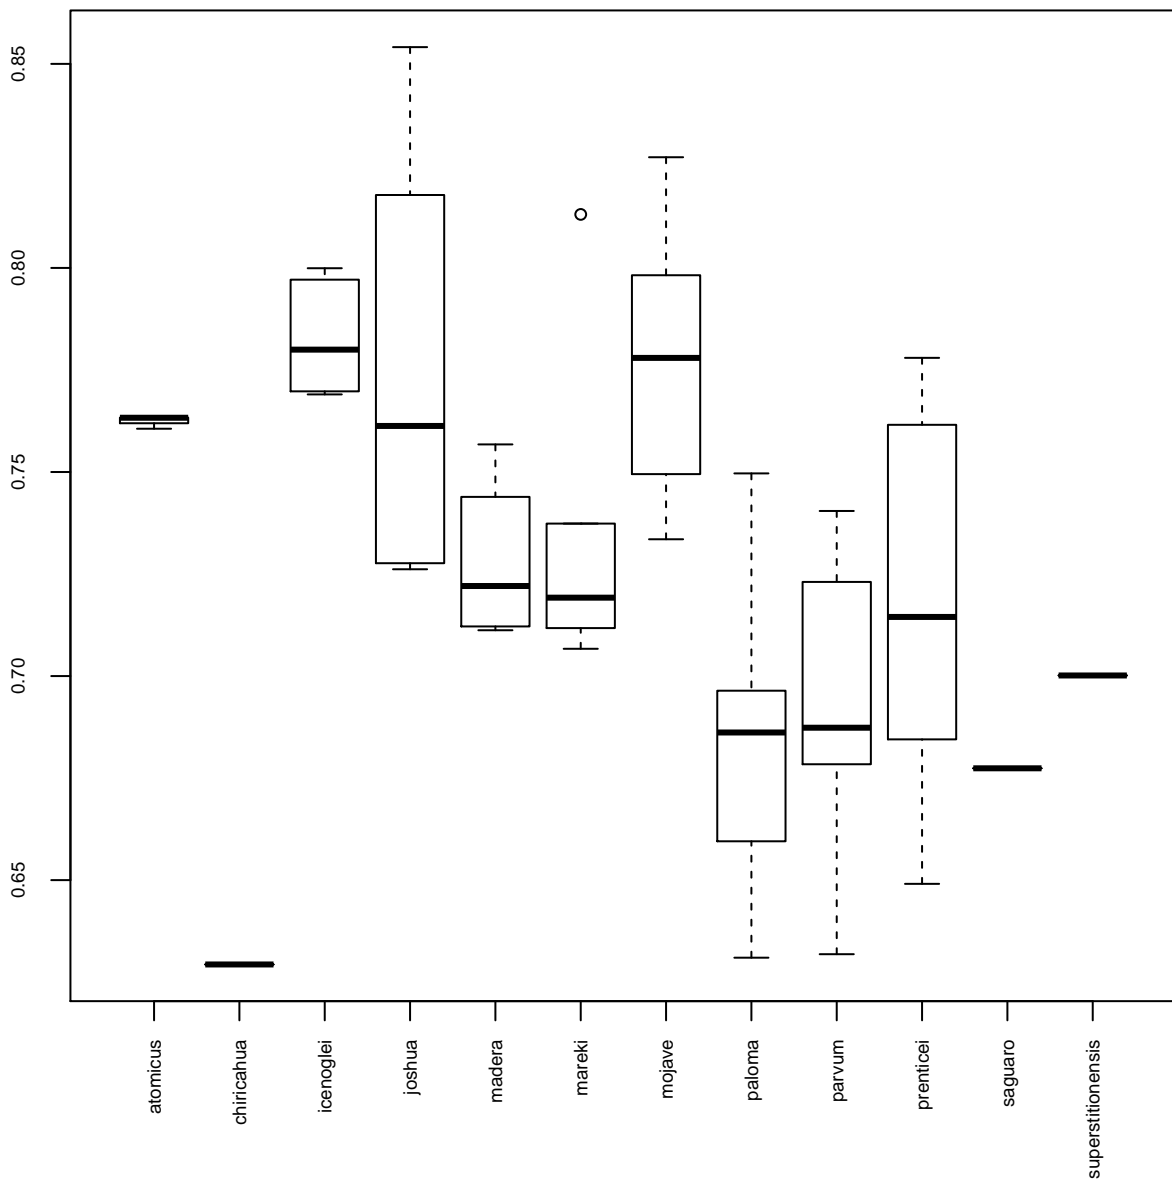

Supplement: Supplementary file 247

## Carapace Length/Tarsus 3 ratio – males

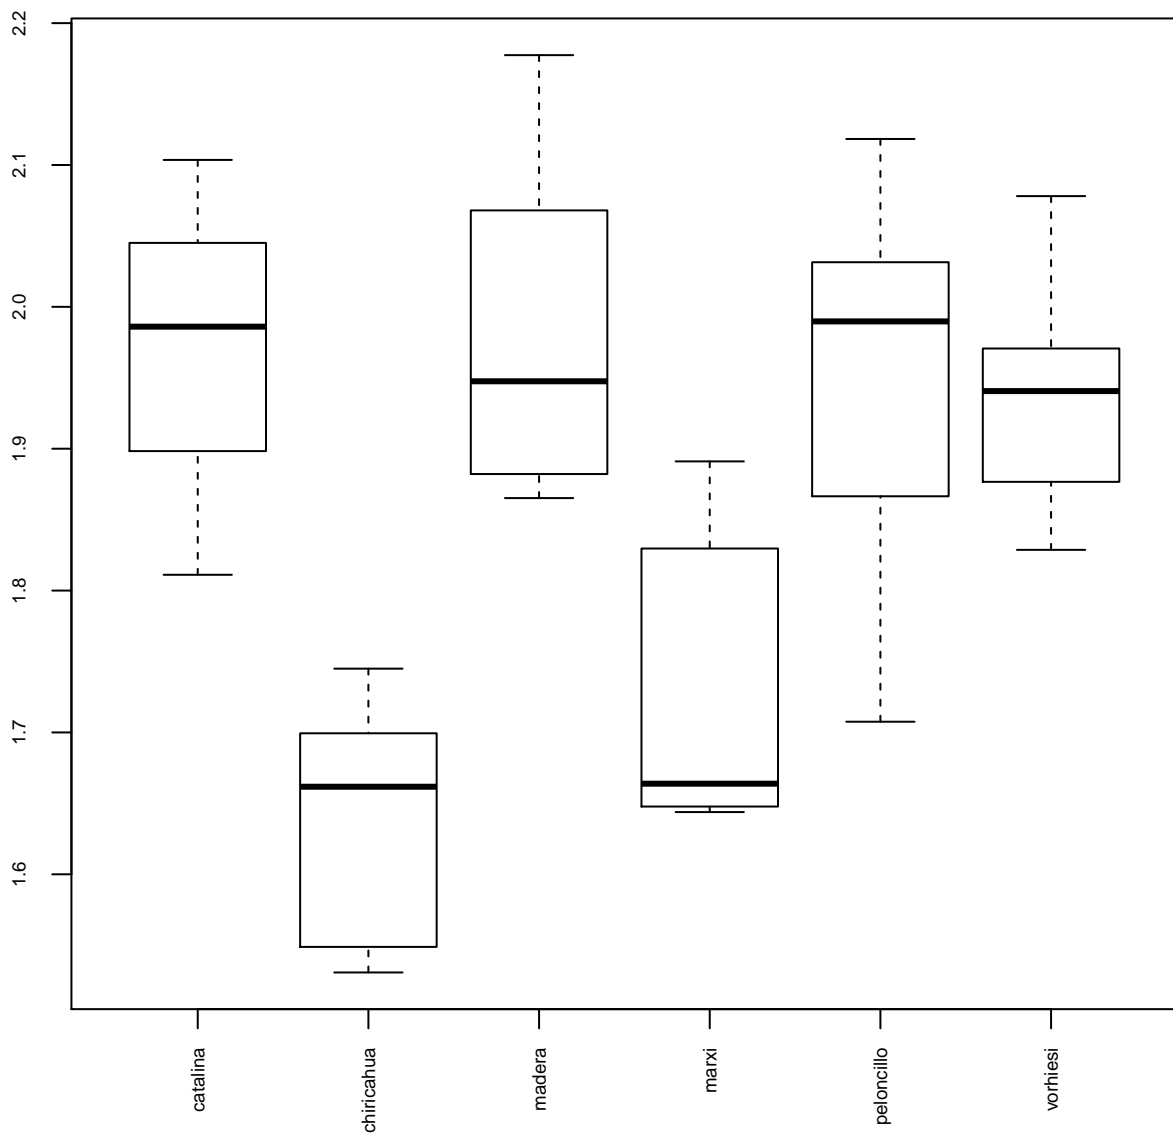

Supplement: Supplementary file 248

## Patella 3/Tibia 3 ratio – males

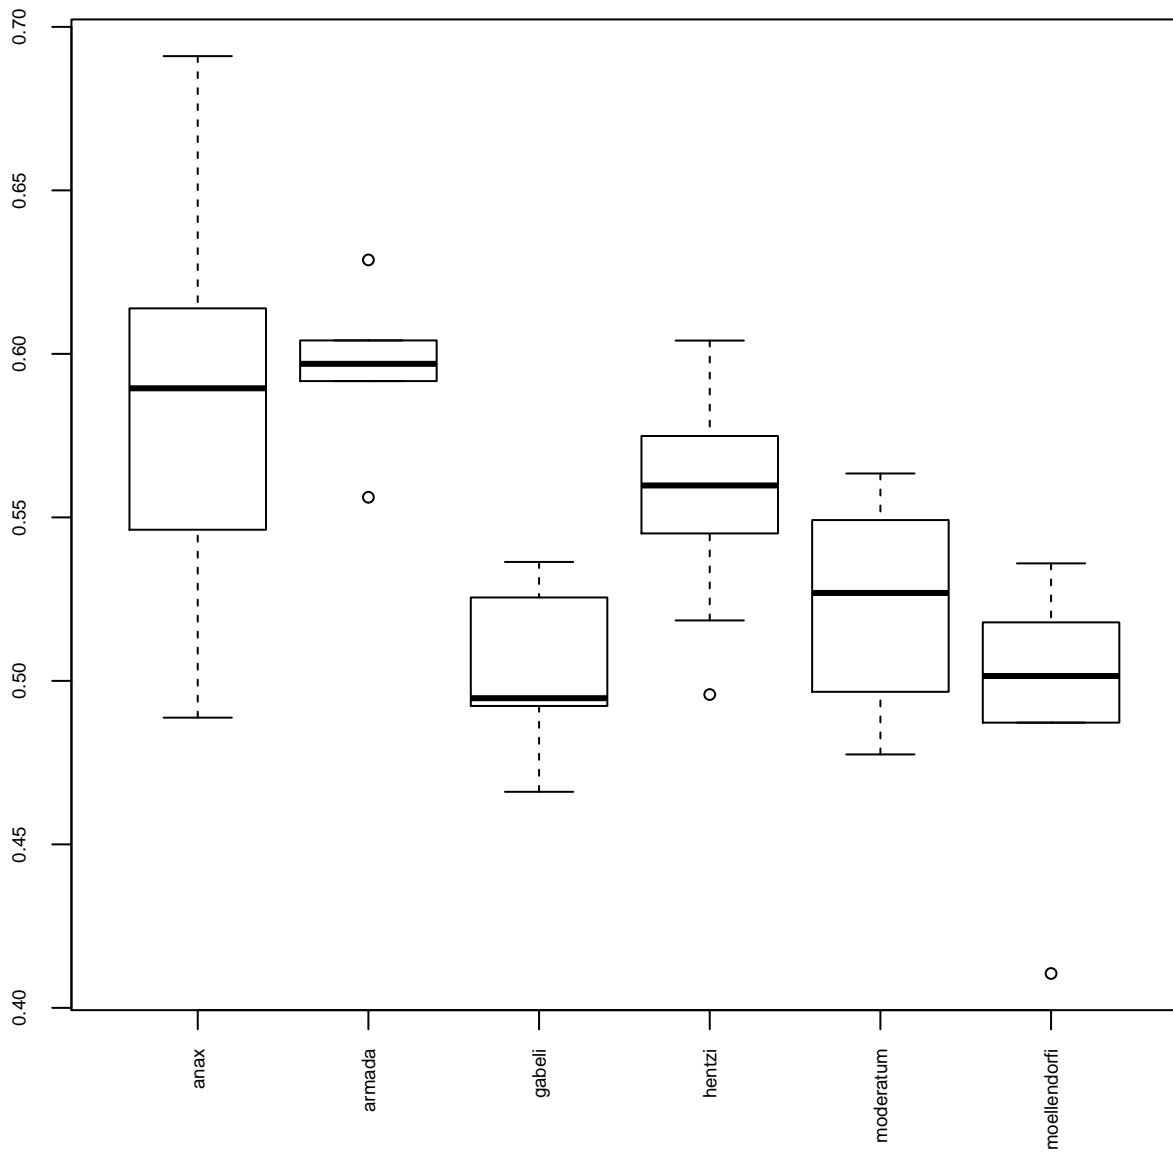

Supplement: Supplementary file 249

## Carapace Length/Femur 1 ratio – females

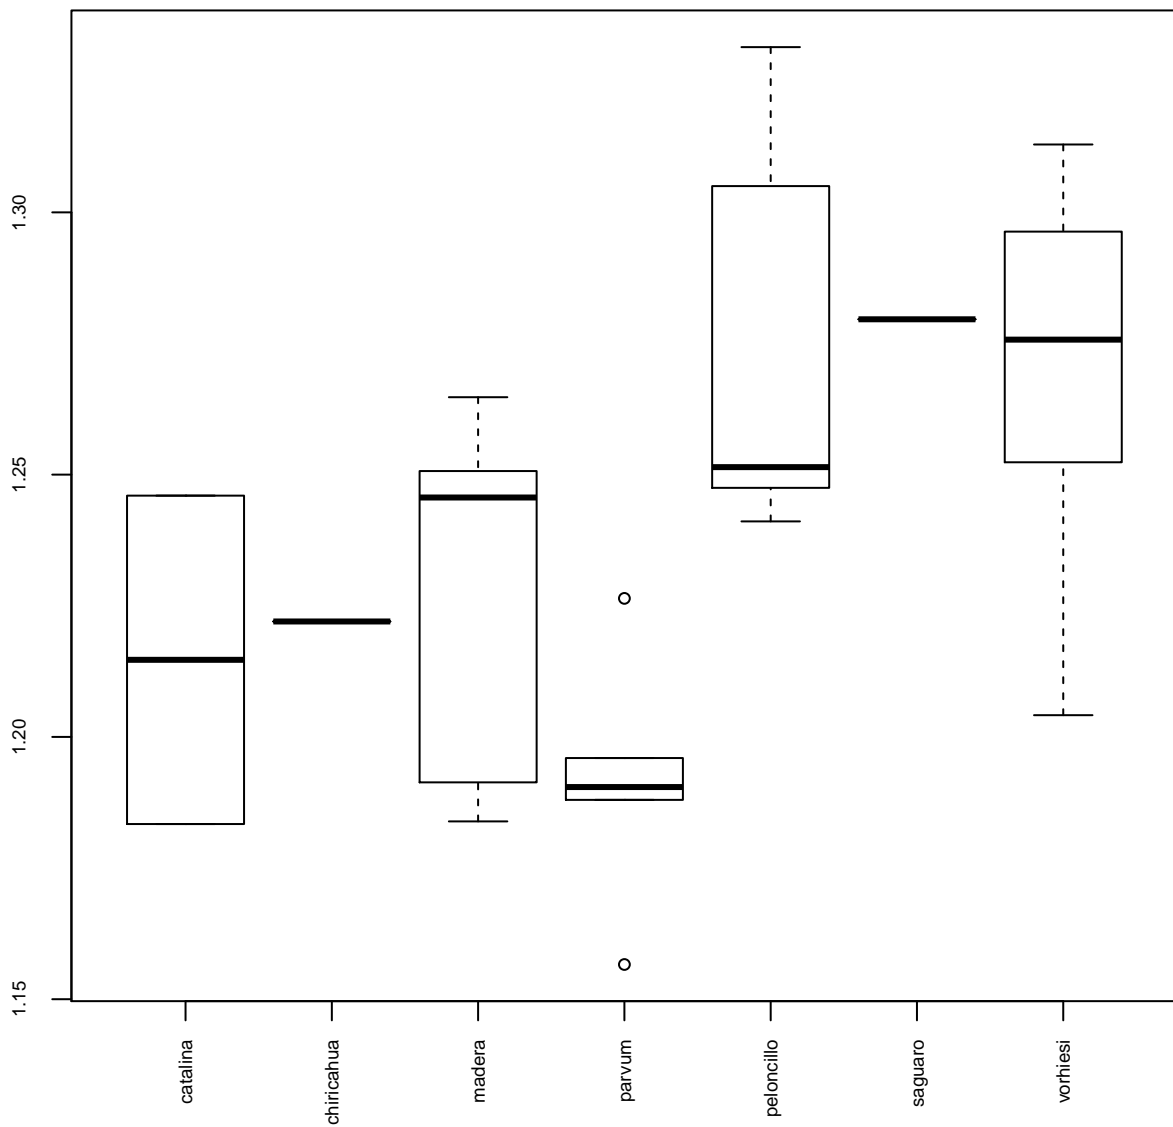

Supplement: Supplementary file 250

## Palpal Tibia/Metatarsus 3 Length ratio – males

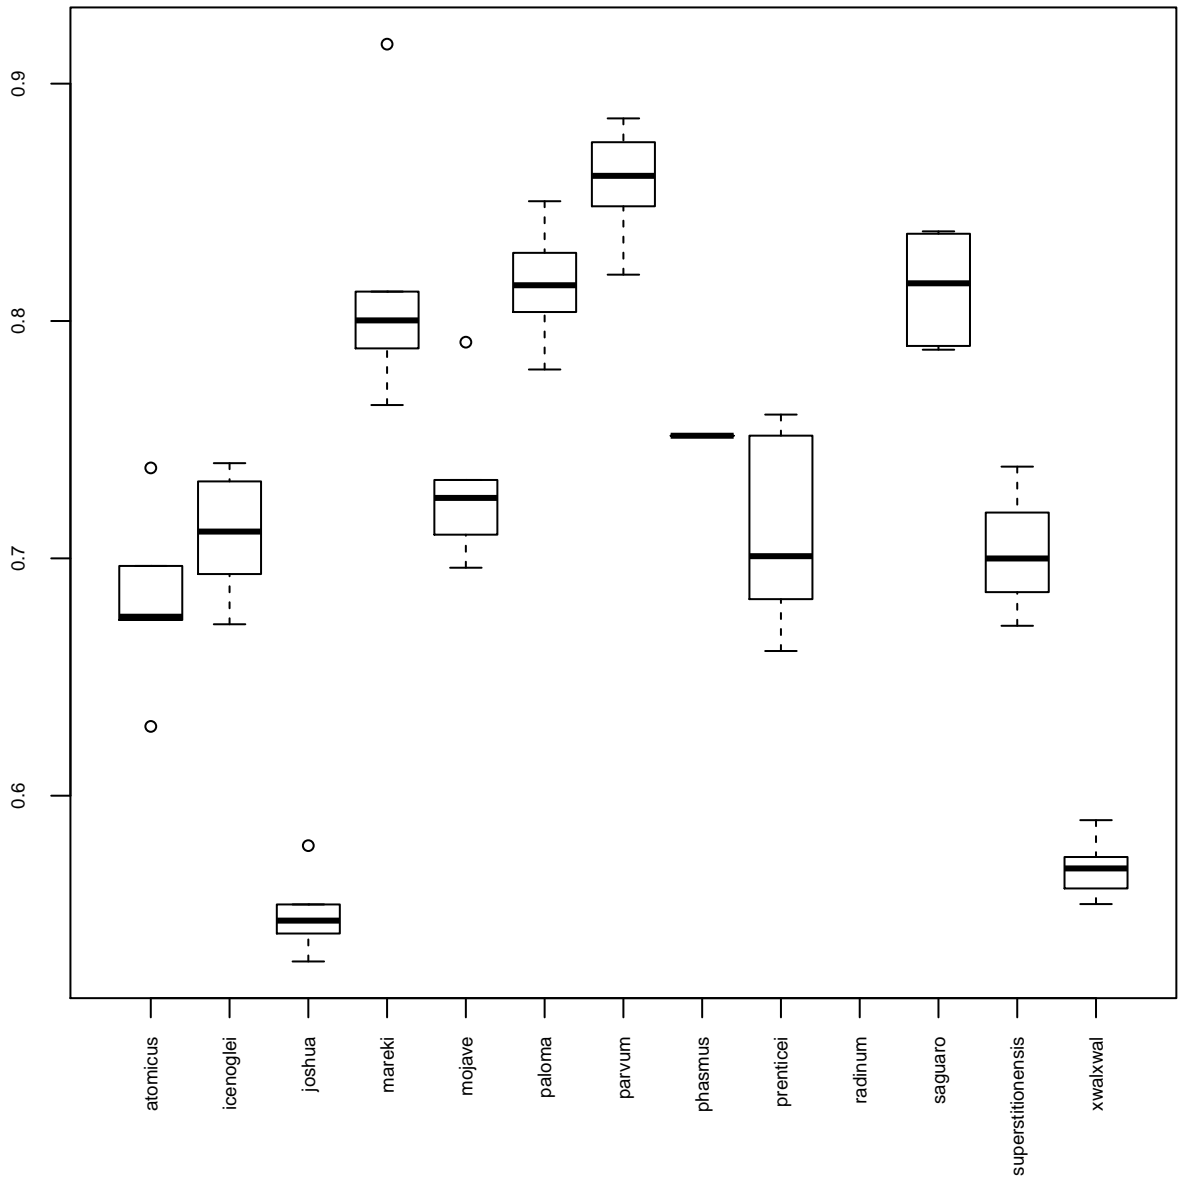

Supplement: Supplementary file 251

## Femur 3/Metatarsus 4 Length ratio – males

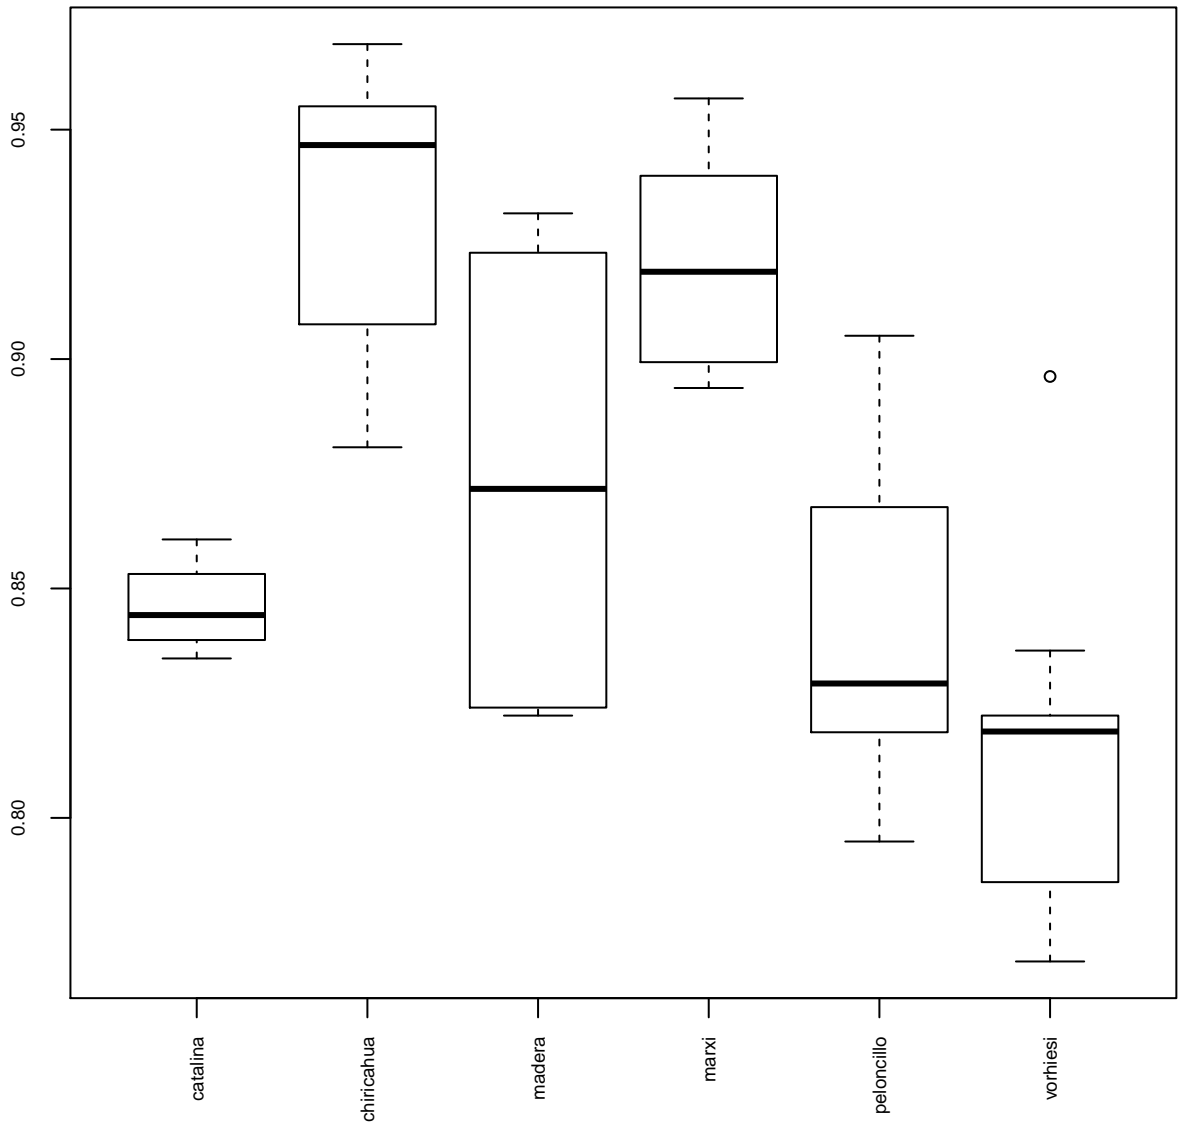

Supplement: Supplementary file 252

## Leg 3/Leg 4 Length ratio – females

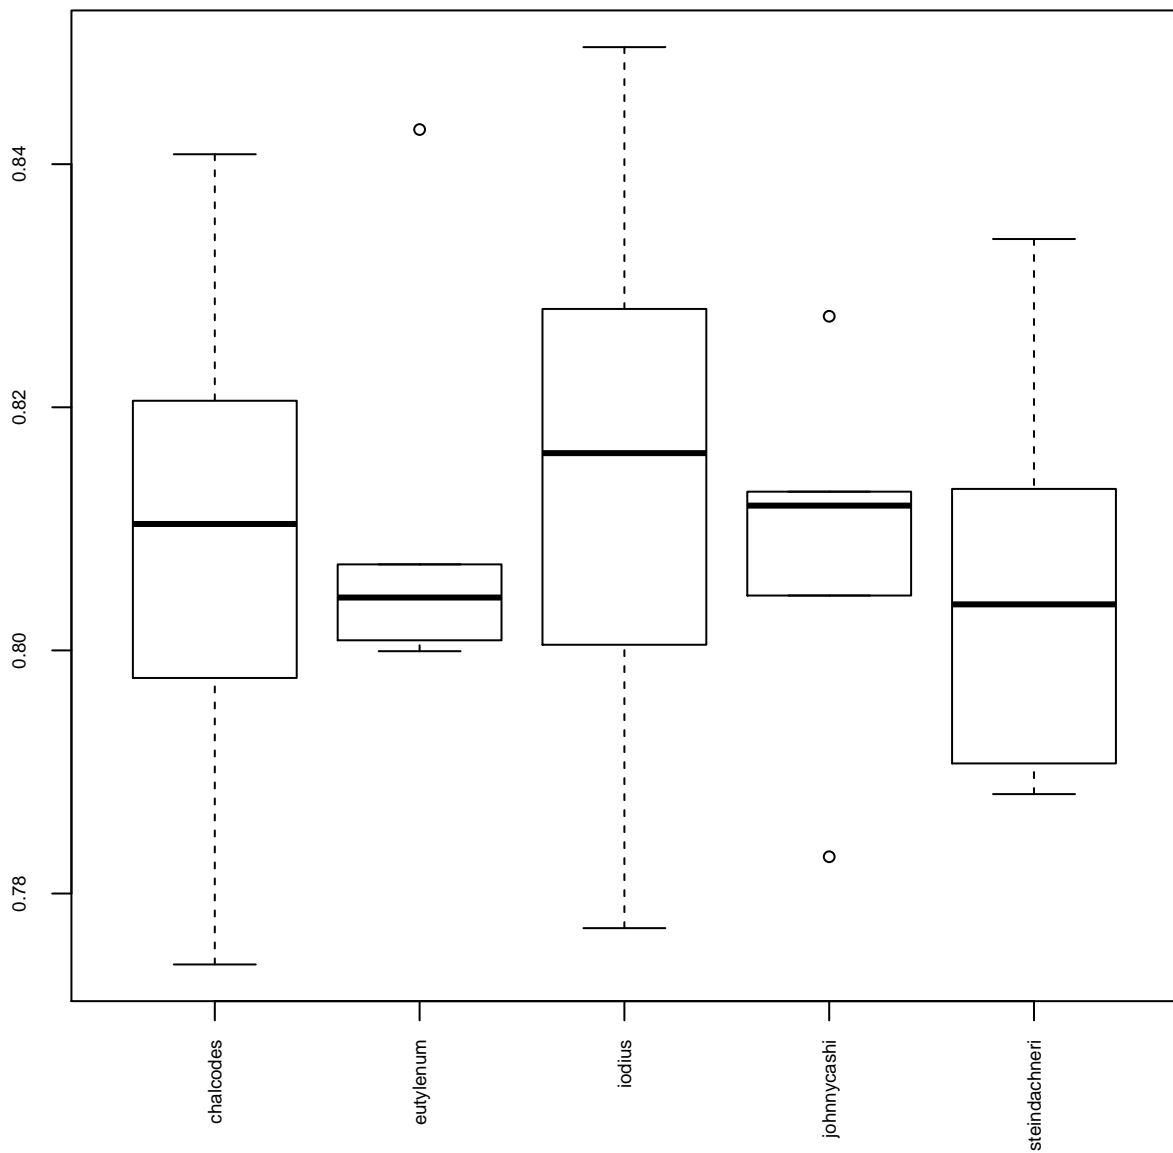

Supplement: Supplementary file 253

## Metatarsus 1/Patella 3 Length ratio – males

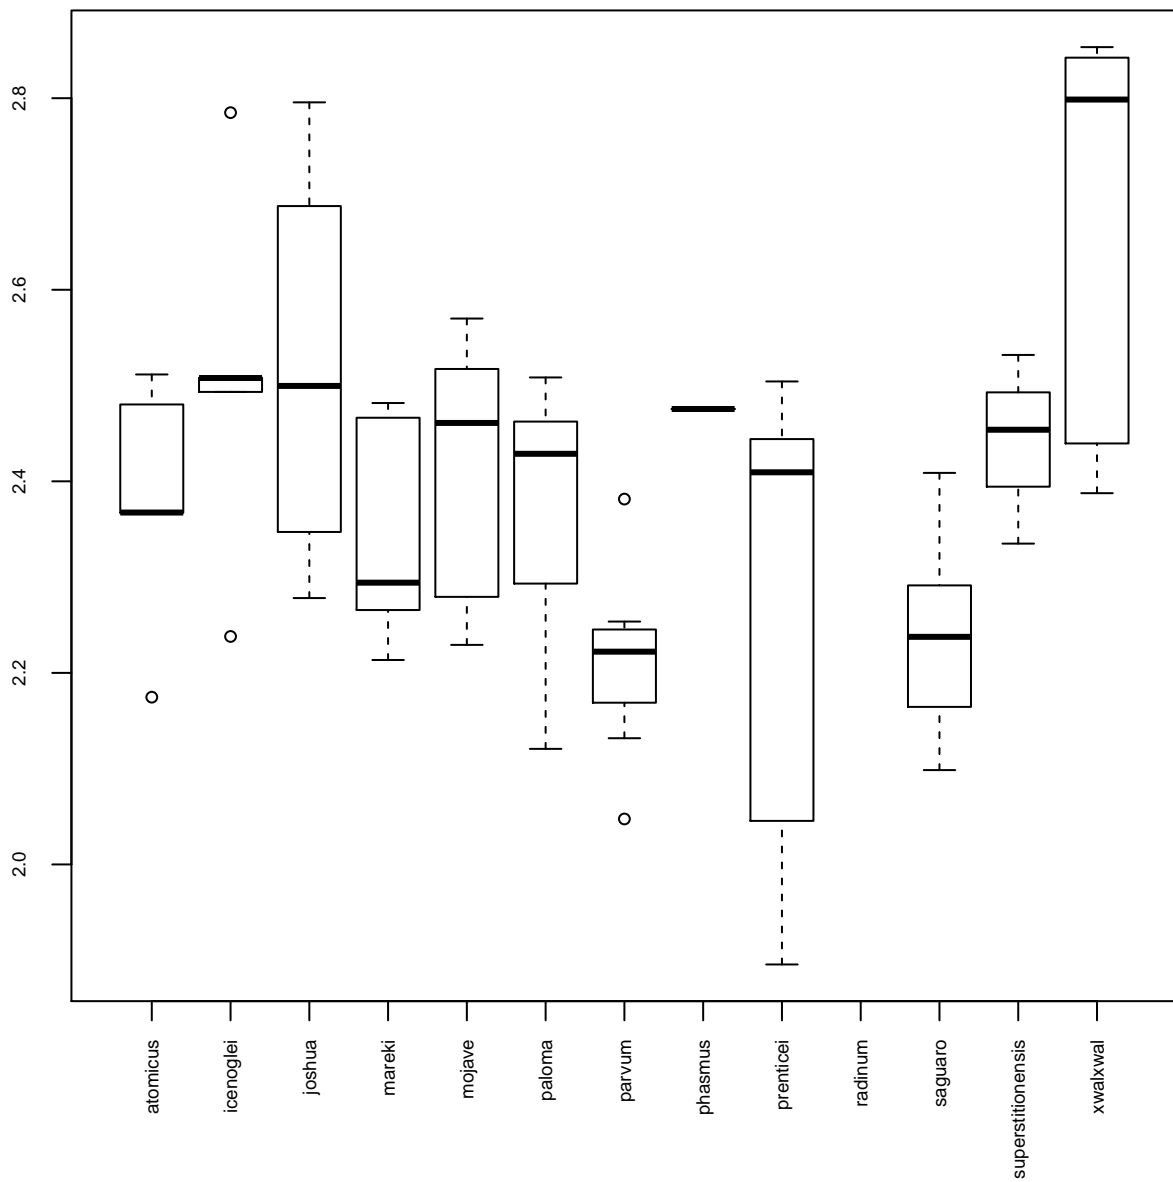

Supplement: Supplementary file 254

## Leg 1 Length/Carapace Length ratio – males

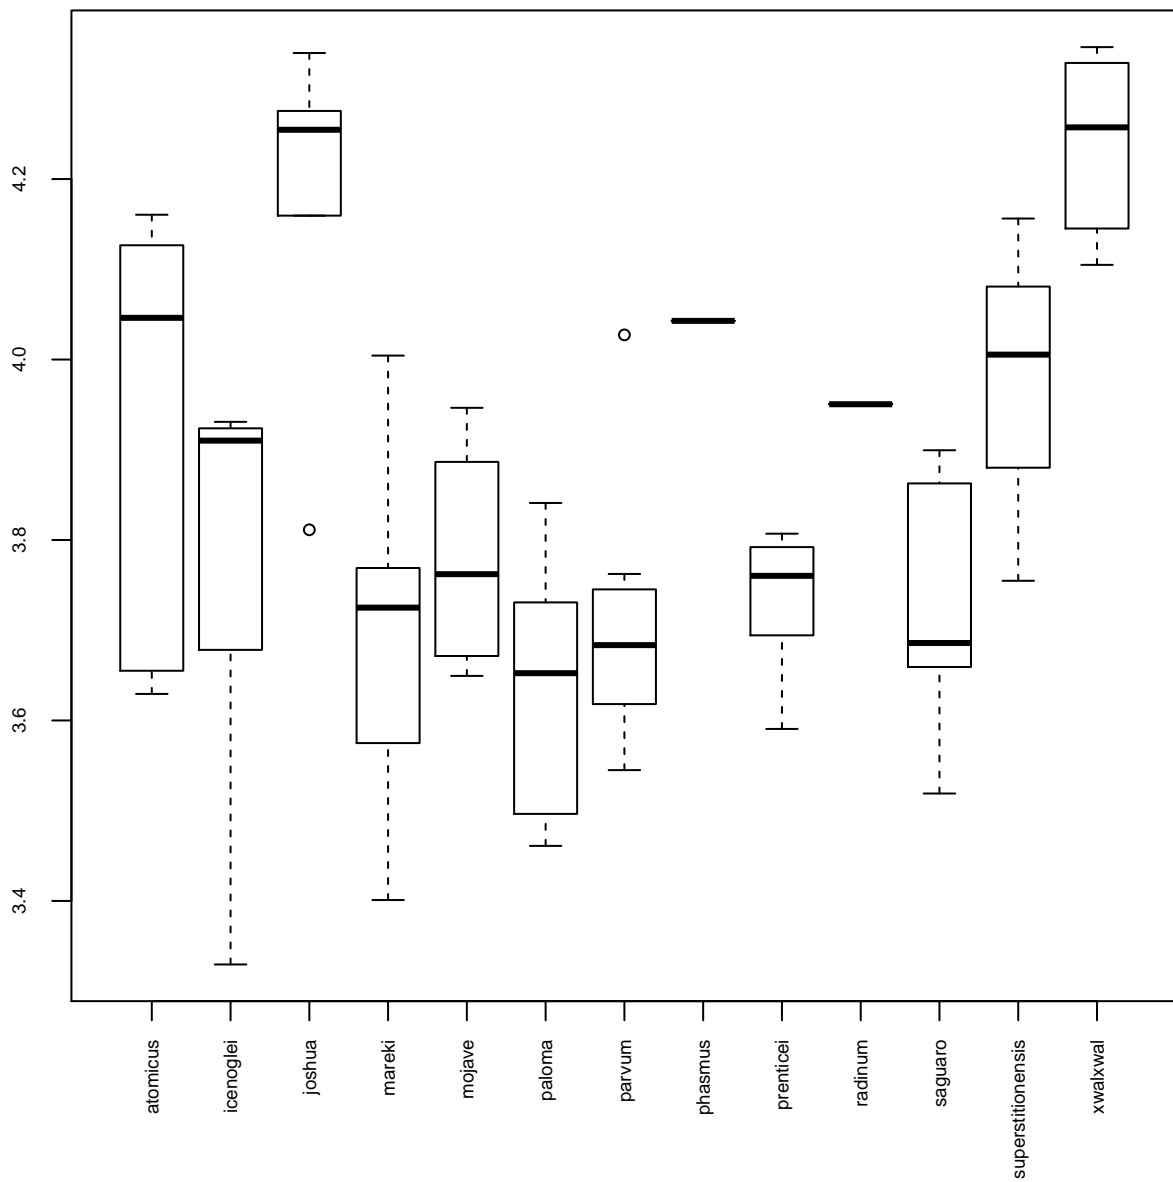

Supplement: Supplementary file 255

## Tibia 3/Tarsus 4 Length ratio – females

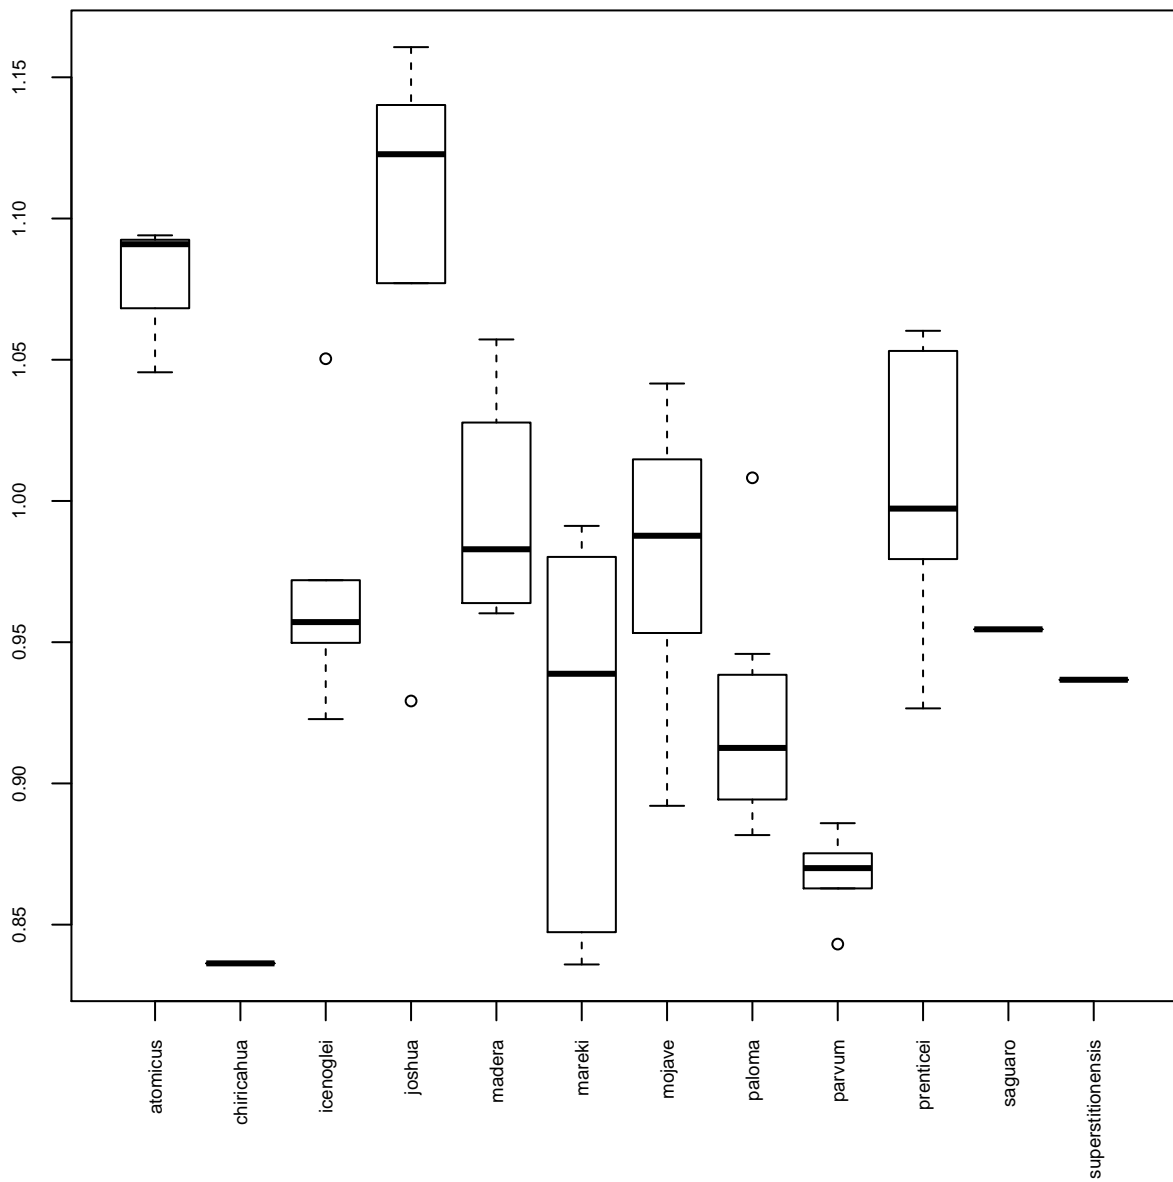

Supplement: Supplementary file 256

## Patella 1/Tibia 4 Length ratio – females

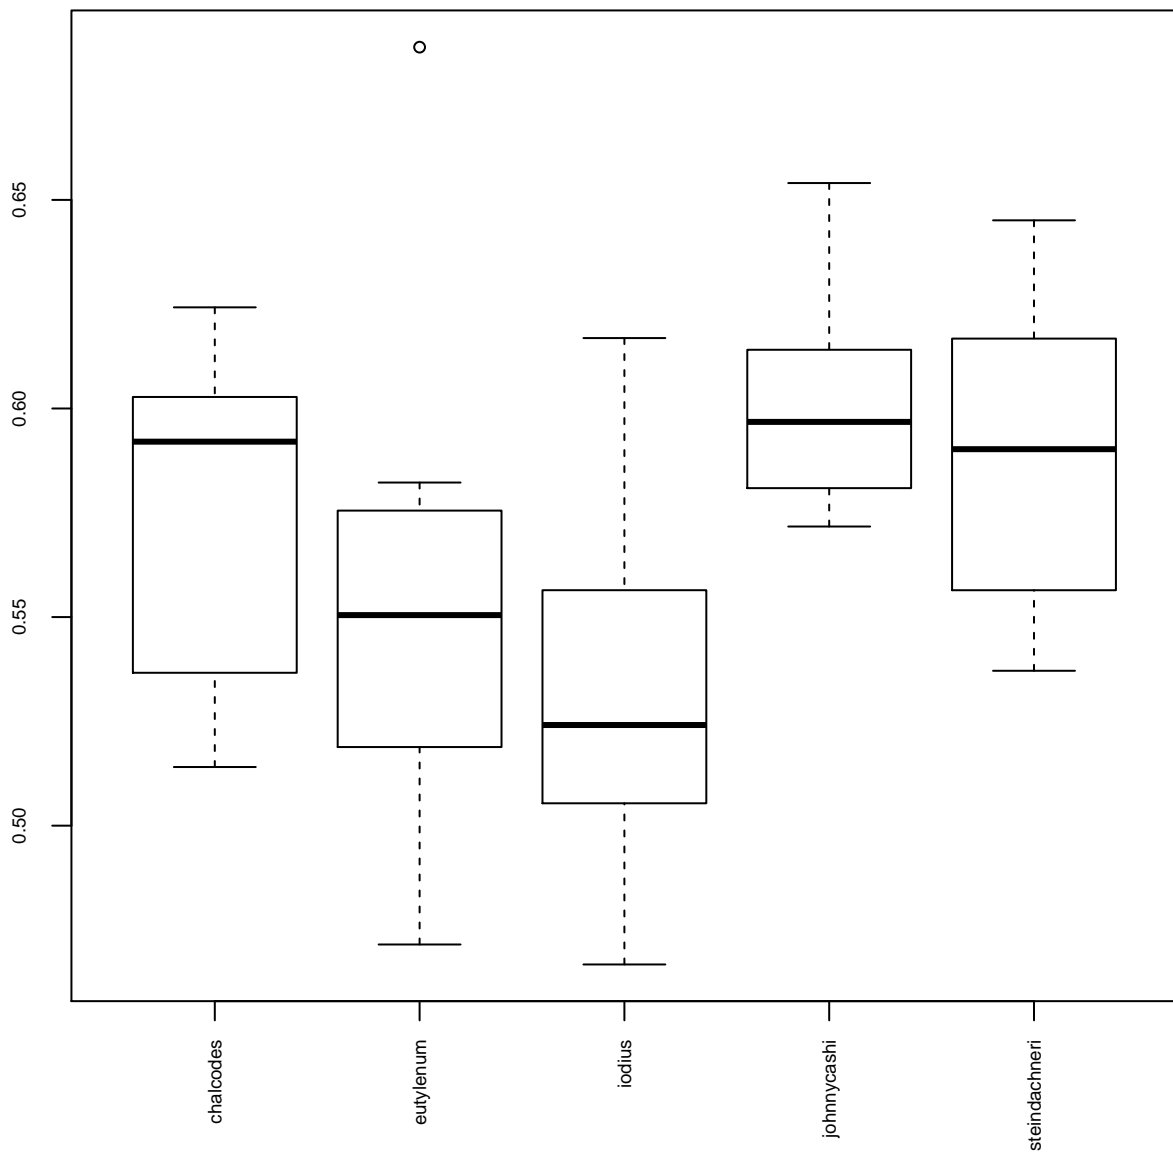

Supplement: Supplementary file 257

## Tarsus 3/Tibia 4 Length ratio – males

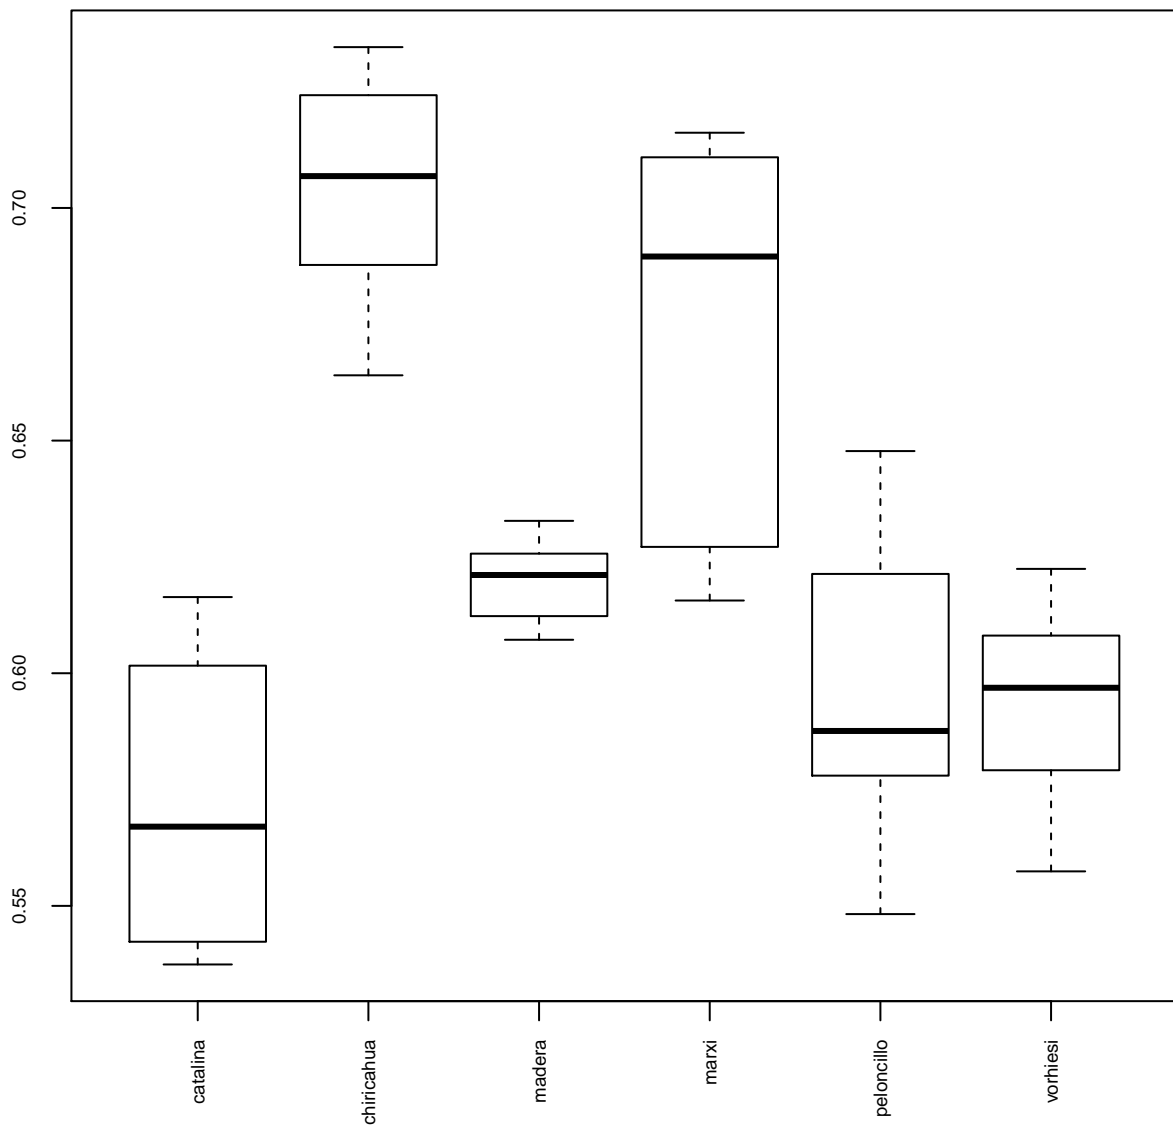

Supplement: Supplementary file 258

## Patella 3/Femur 4 Length ratio – females

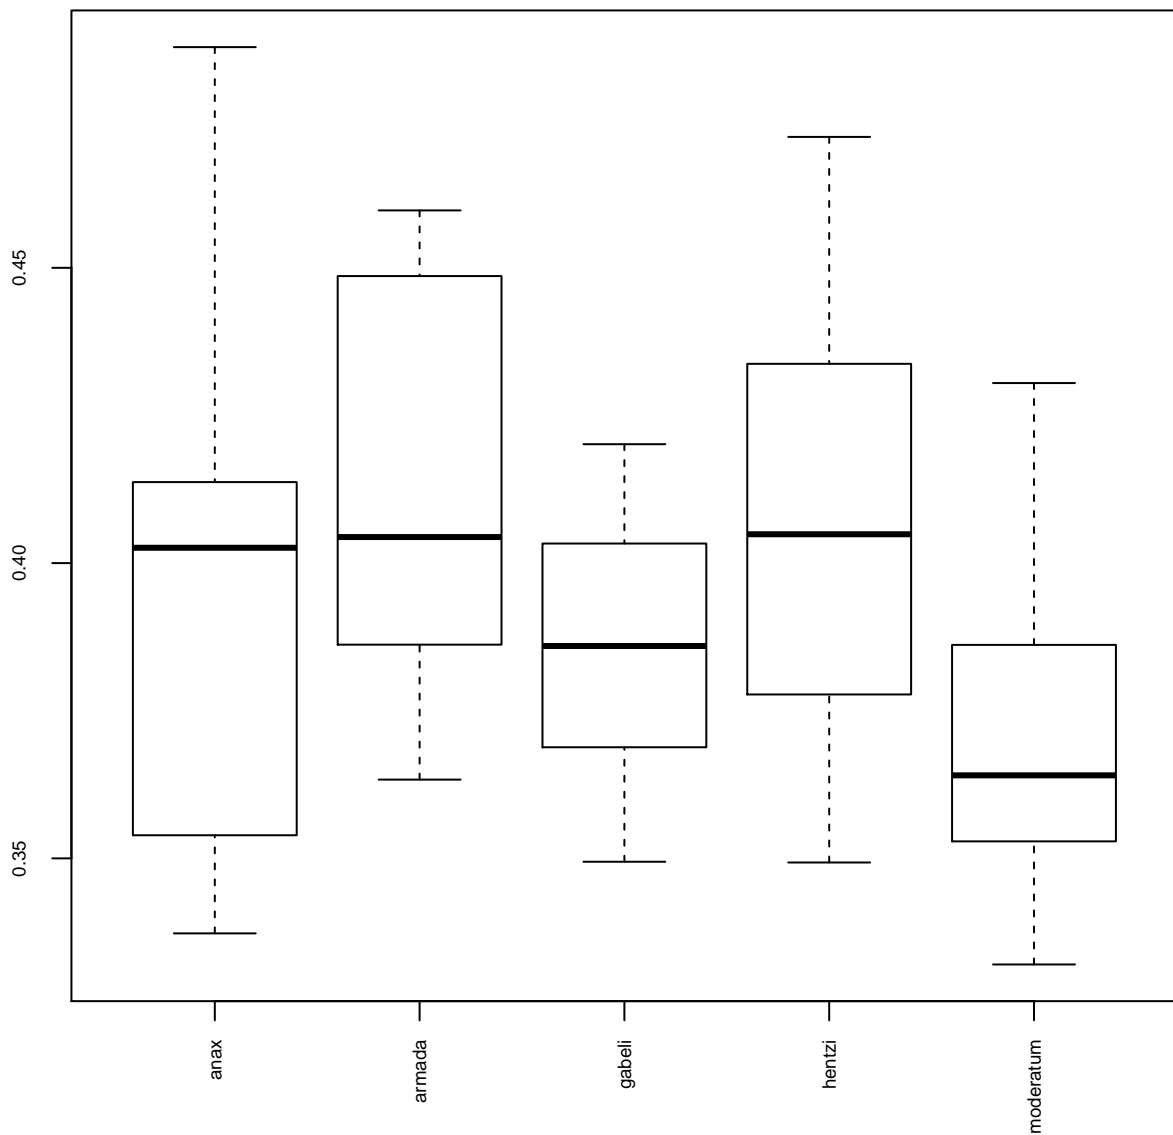

Supplement: Supplementary file 259

## Patella 1/Femur 4 Length ratio – females

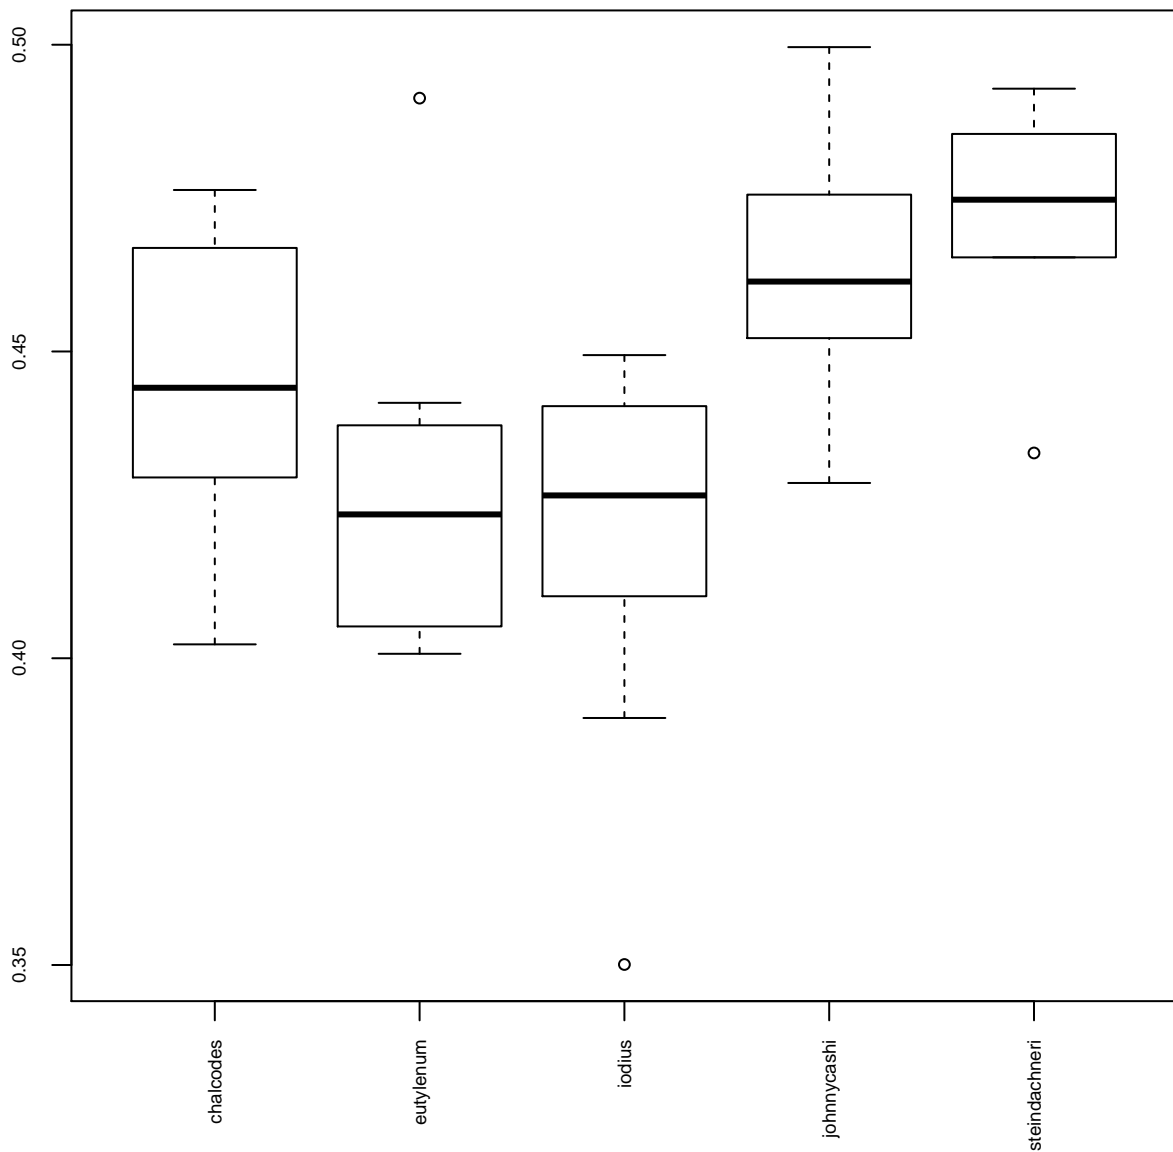

Supplement: Supplementary file 260

## Tarsus 3/Patella 4 Length ratio – females

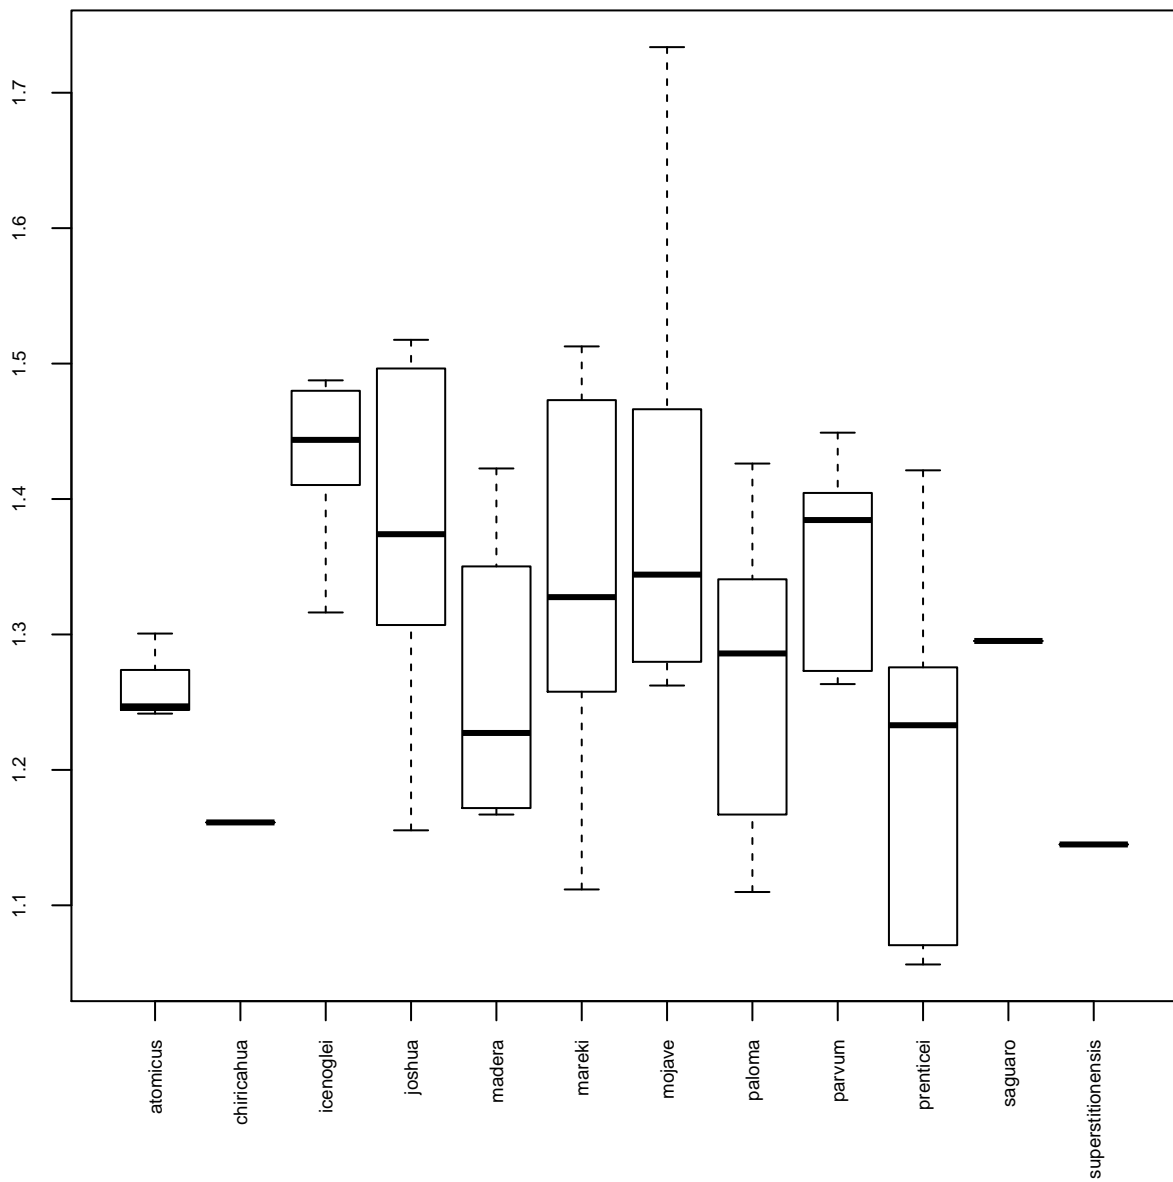

Supplement: Supplementary file 261

## Tibia 1/Patella 4 Length ratio – females

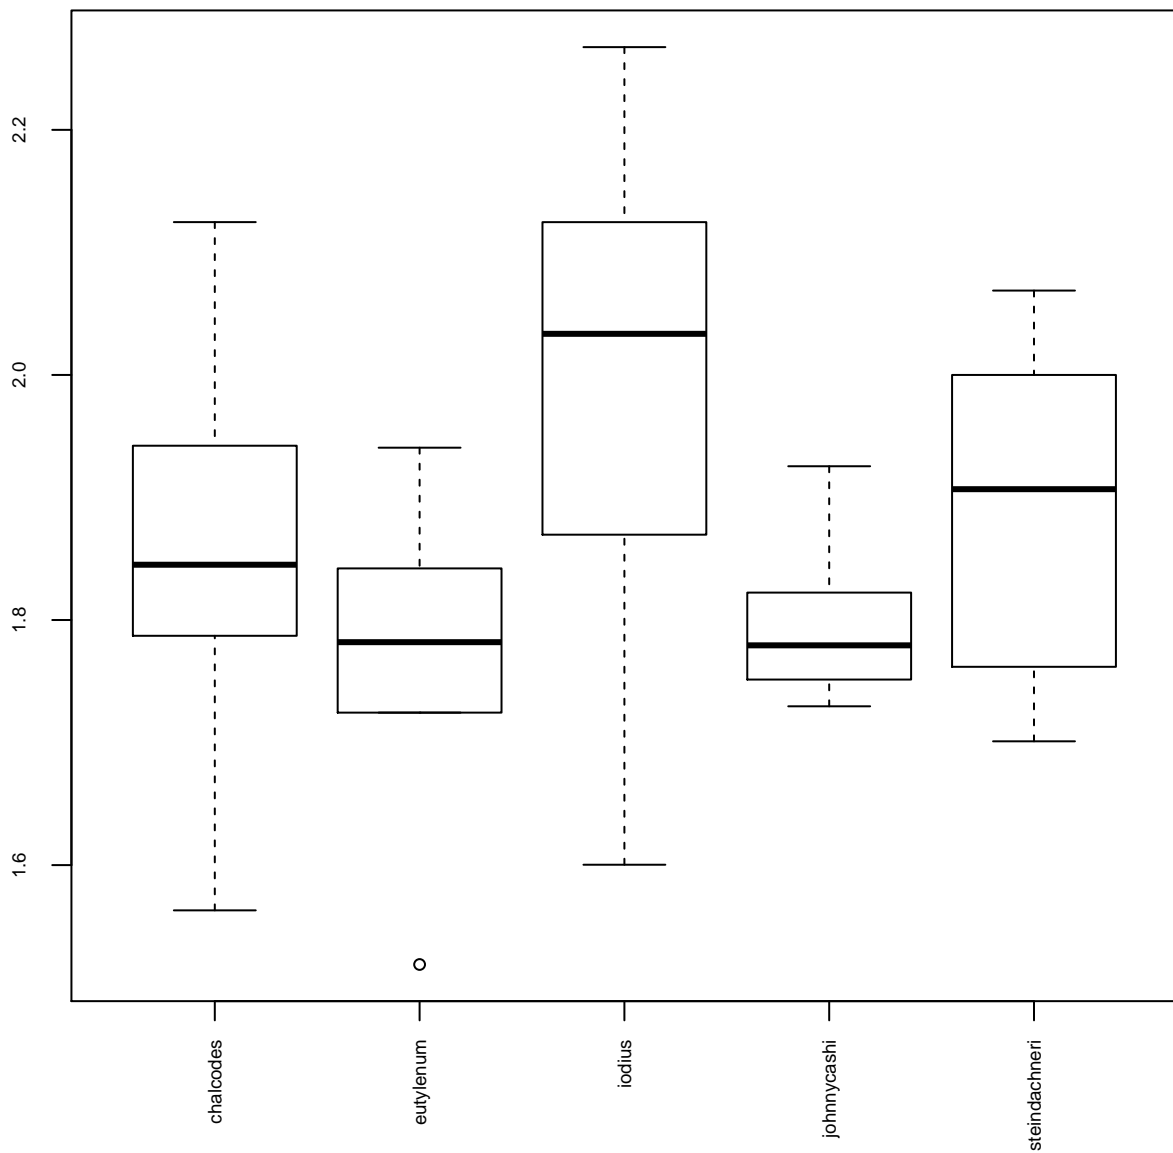

Supplement: Supplementary file 262

## Leg 1 Length/Carapace Length ratio – females

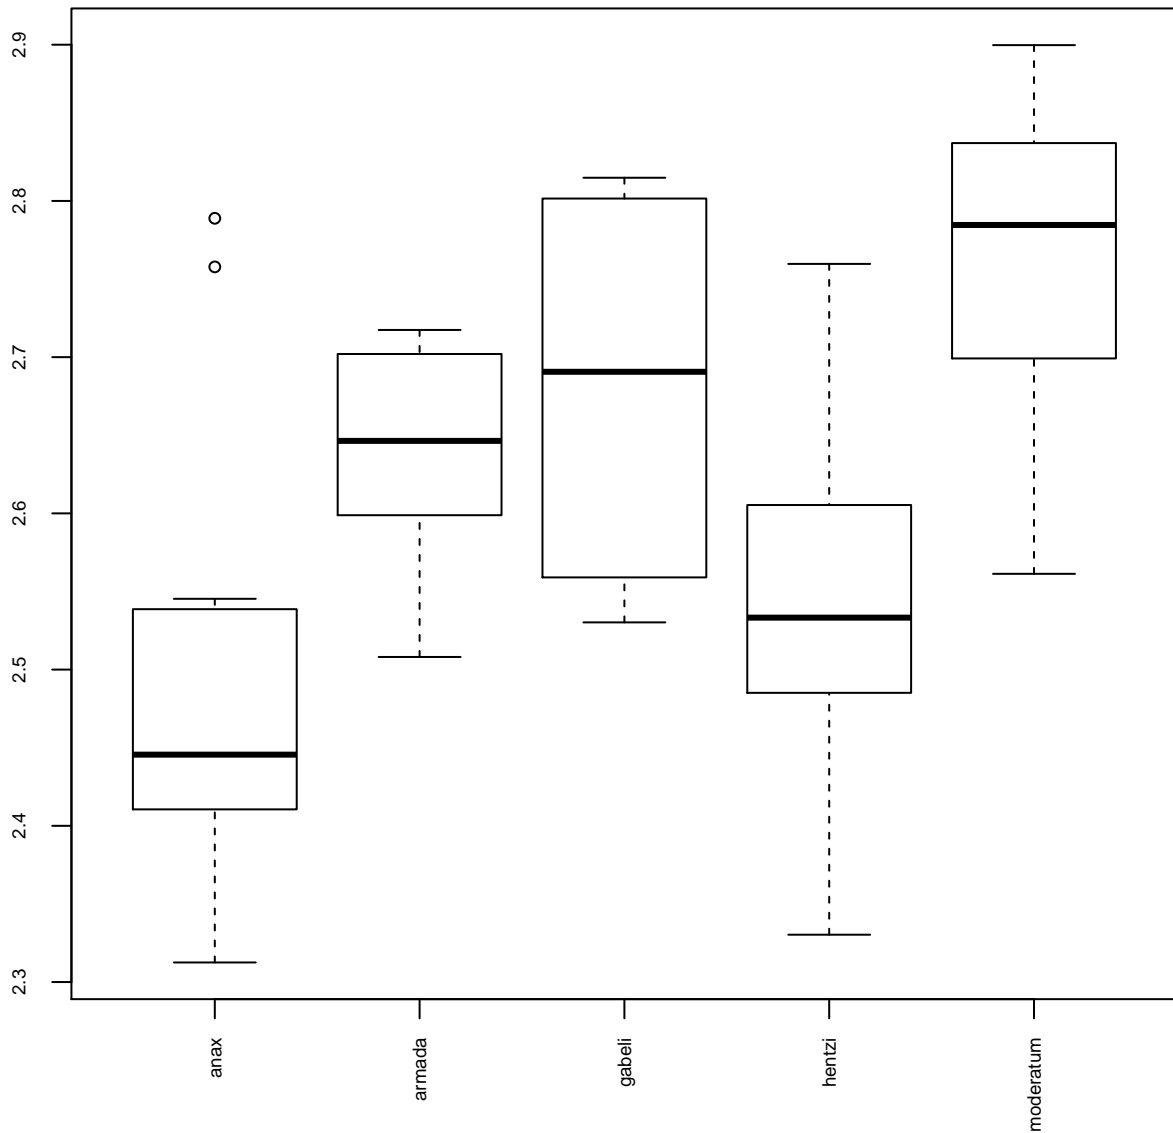

Supplement: Supplementary file 263

## Metatarsus 1/Tarsus 3 Length ratio – females

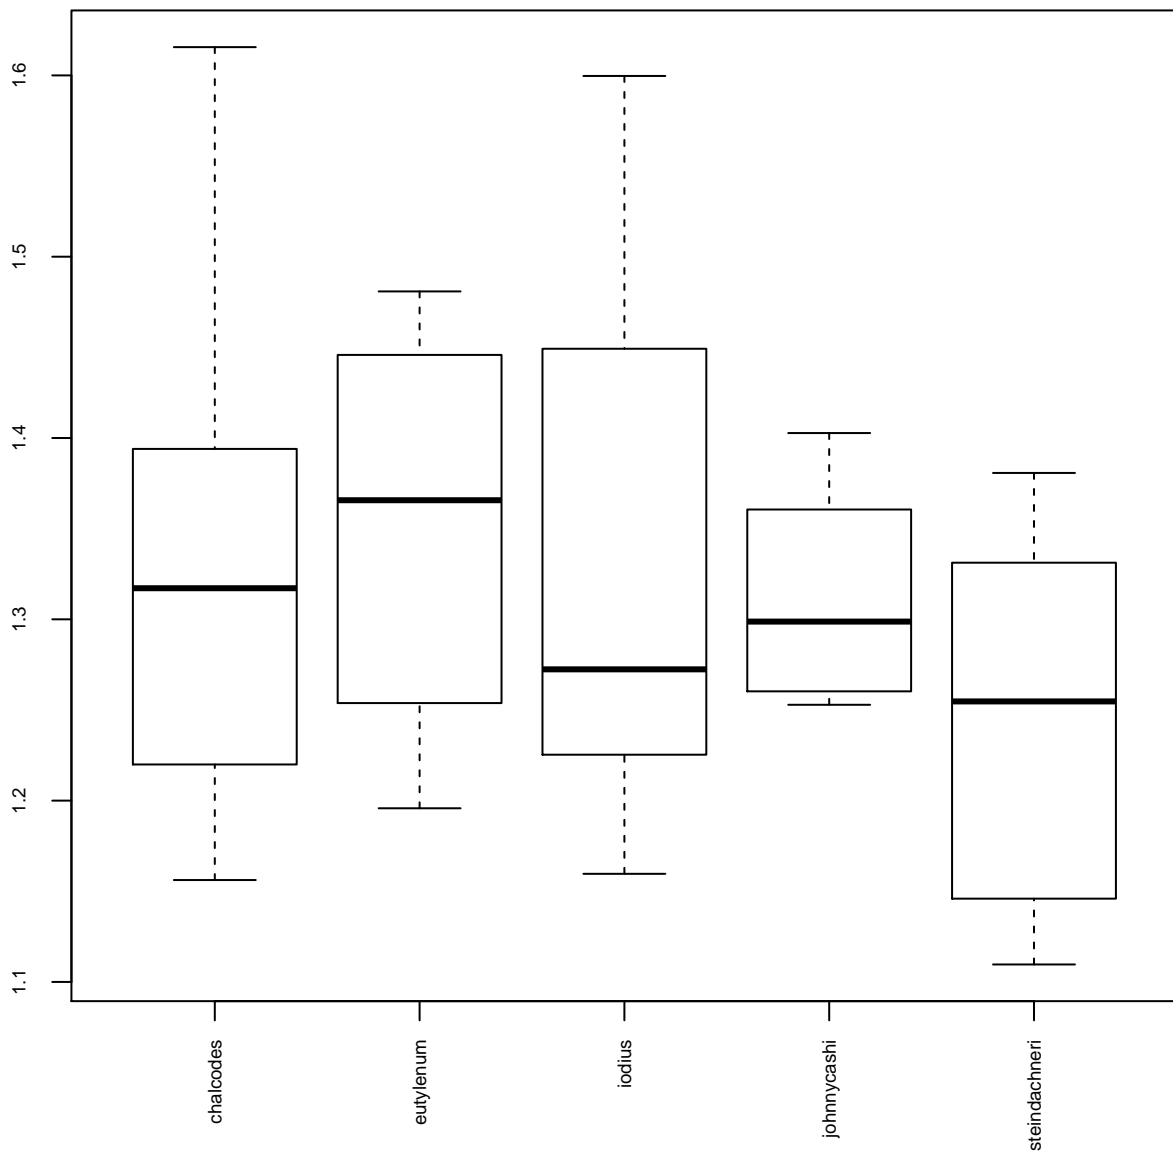

Supplement: Supplementary file 264

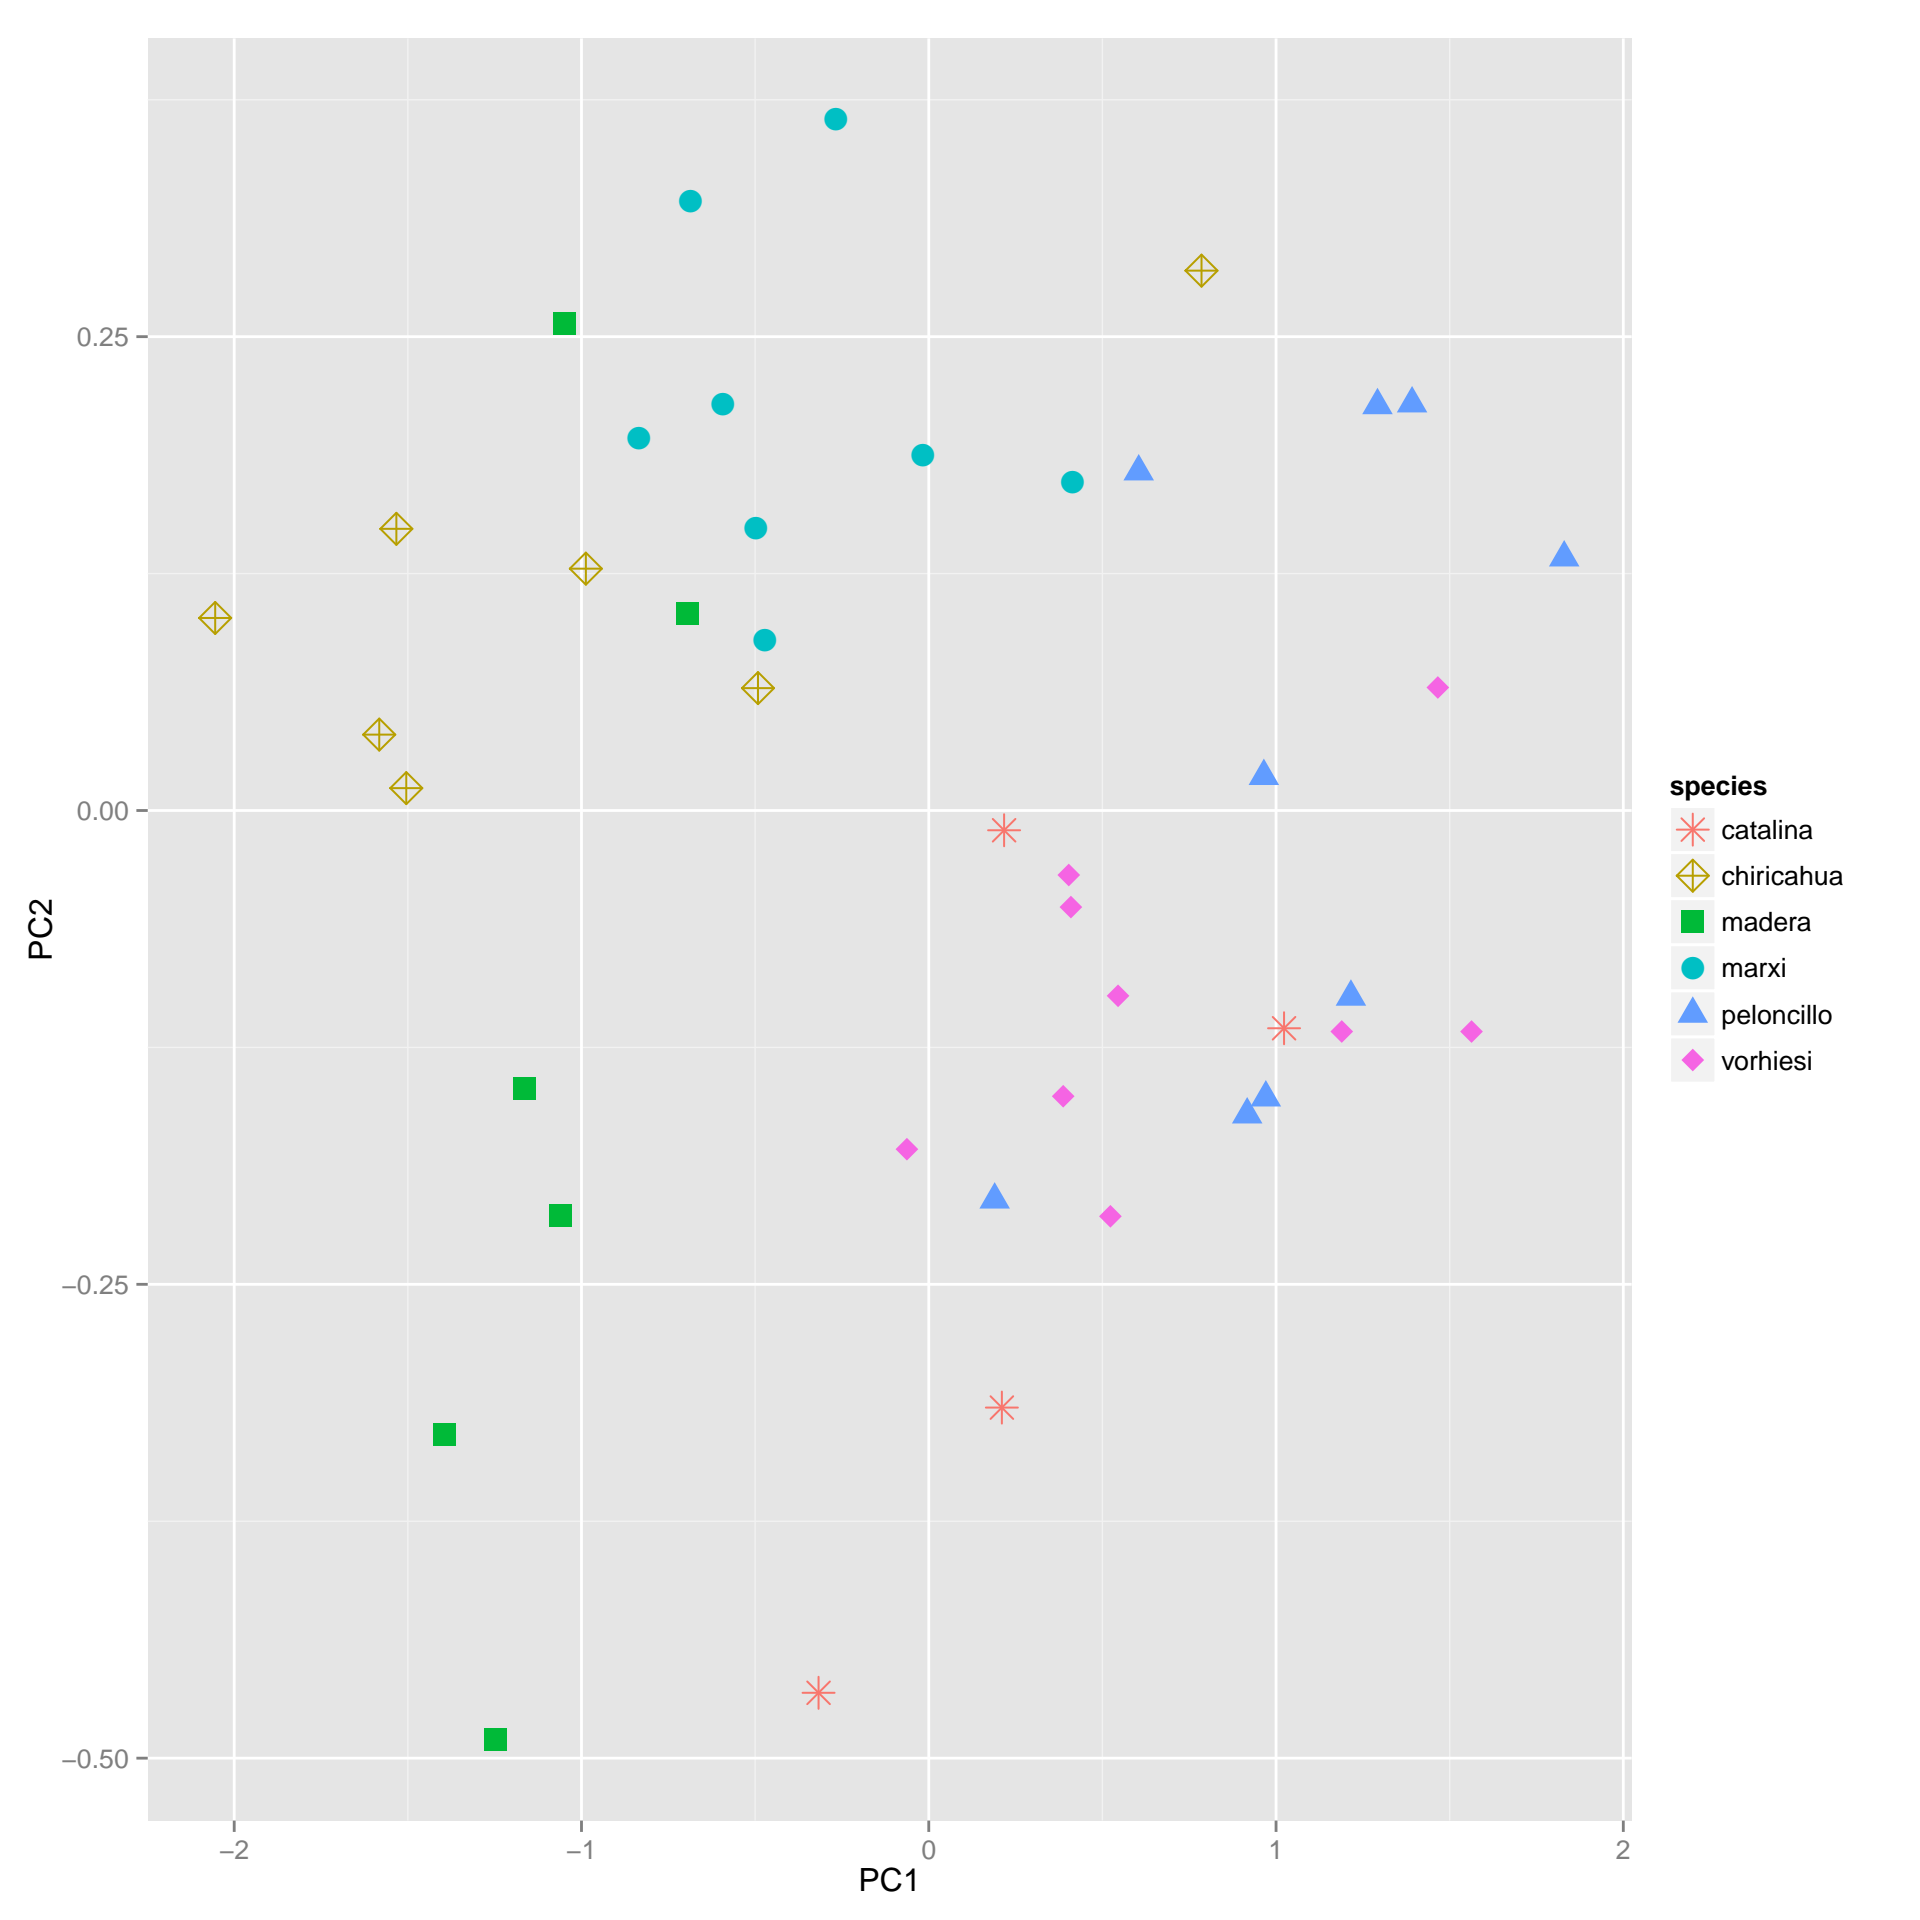

Supplement: Supplementary file 265

## Carapace Length/Metatarsus 4 ratio – females

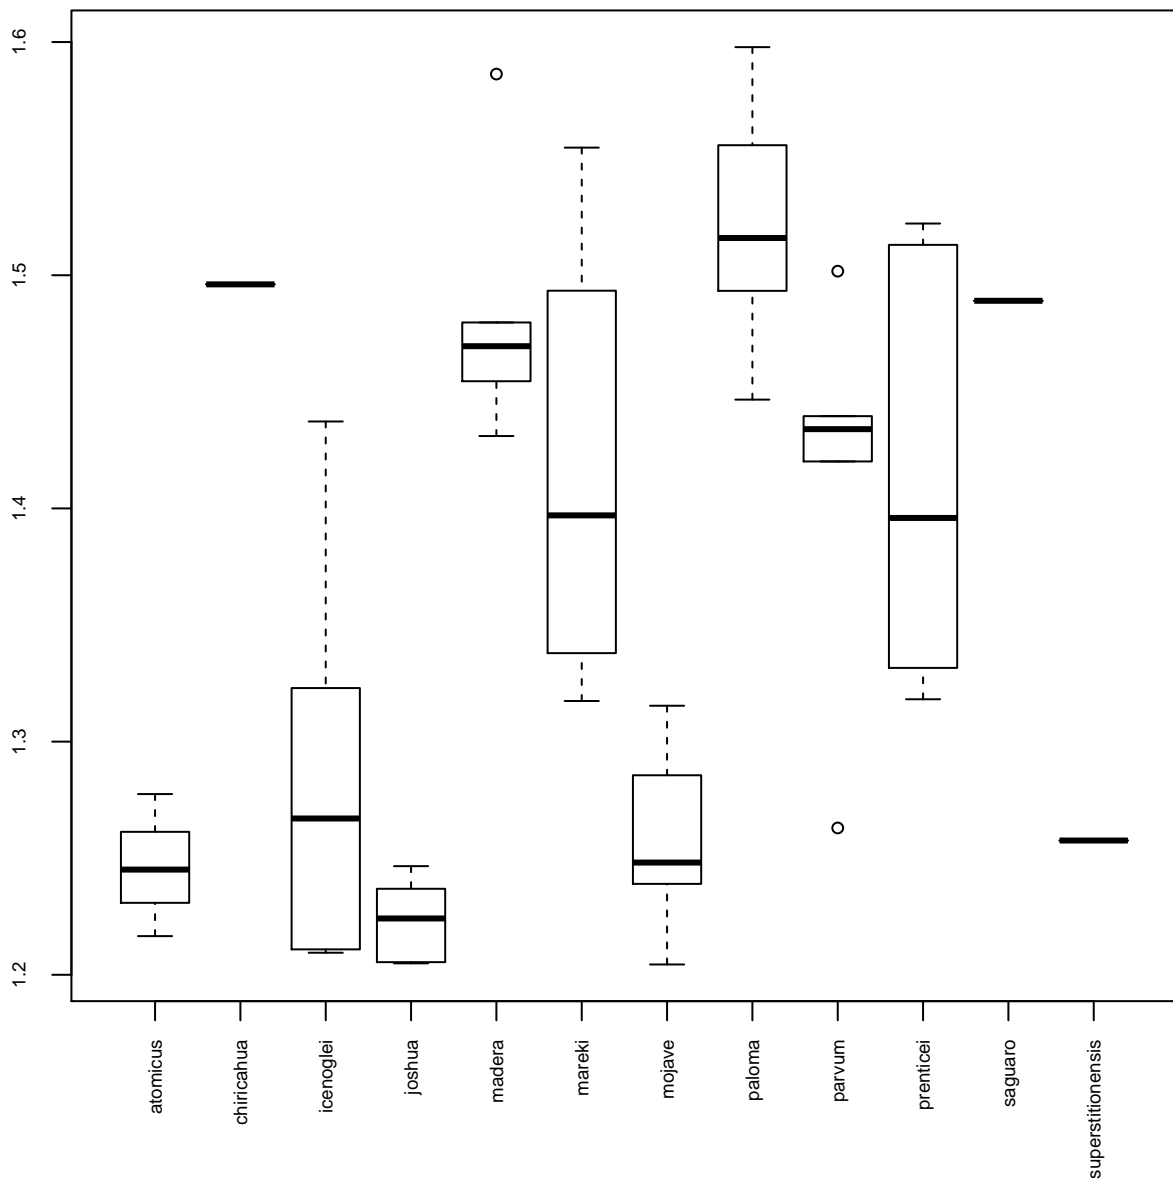

Supplement: Supplementary file 266

## Tibia 1/Femur 3 Length ratio – females

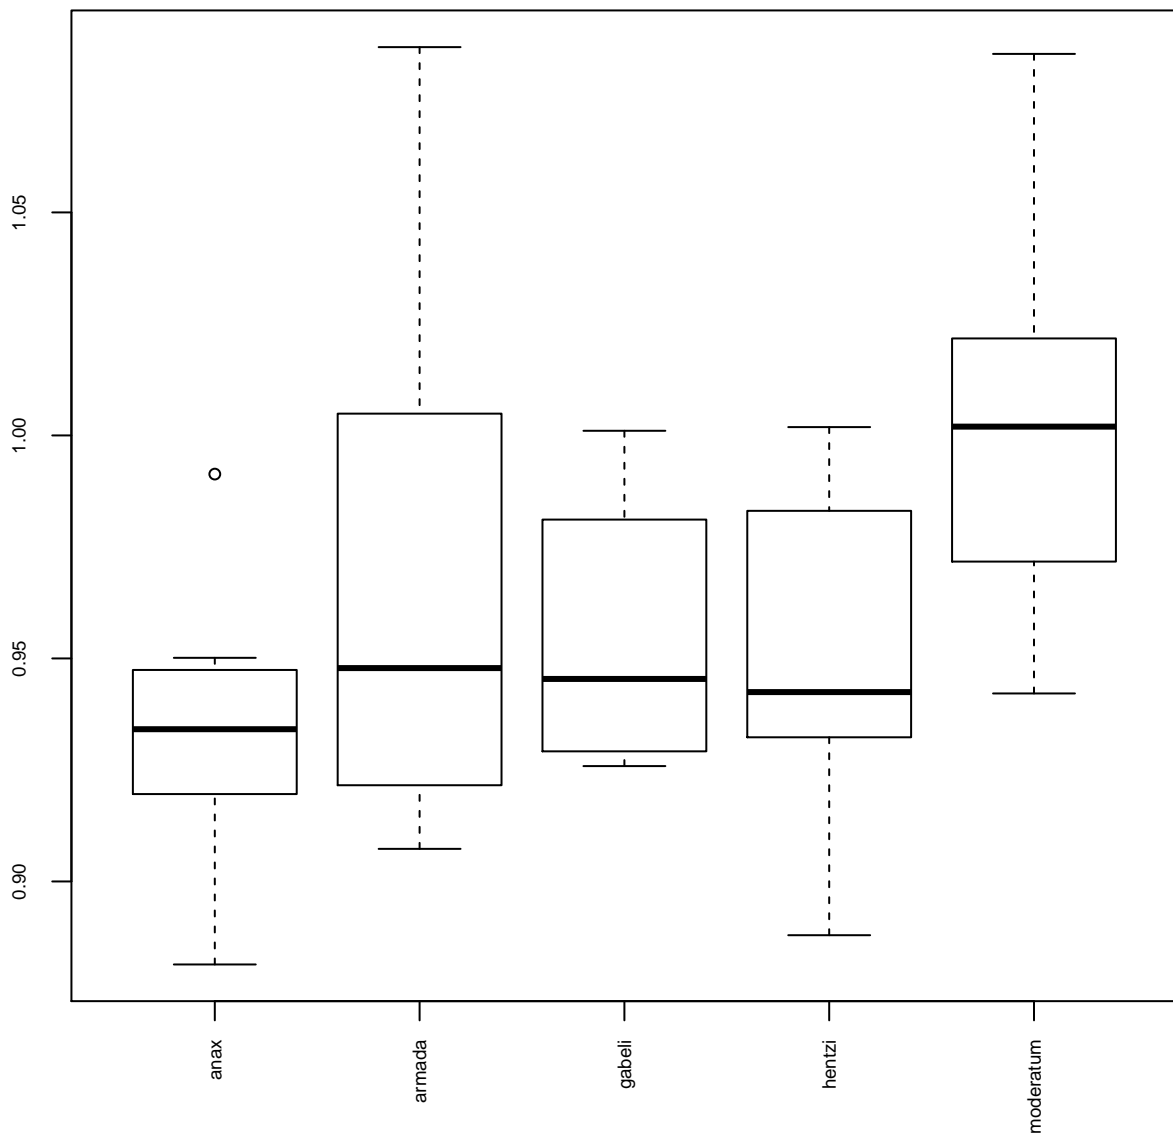

Supplement: Supplementary file 267

## Carapace Length/Tibia 3 ratio – males

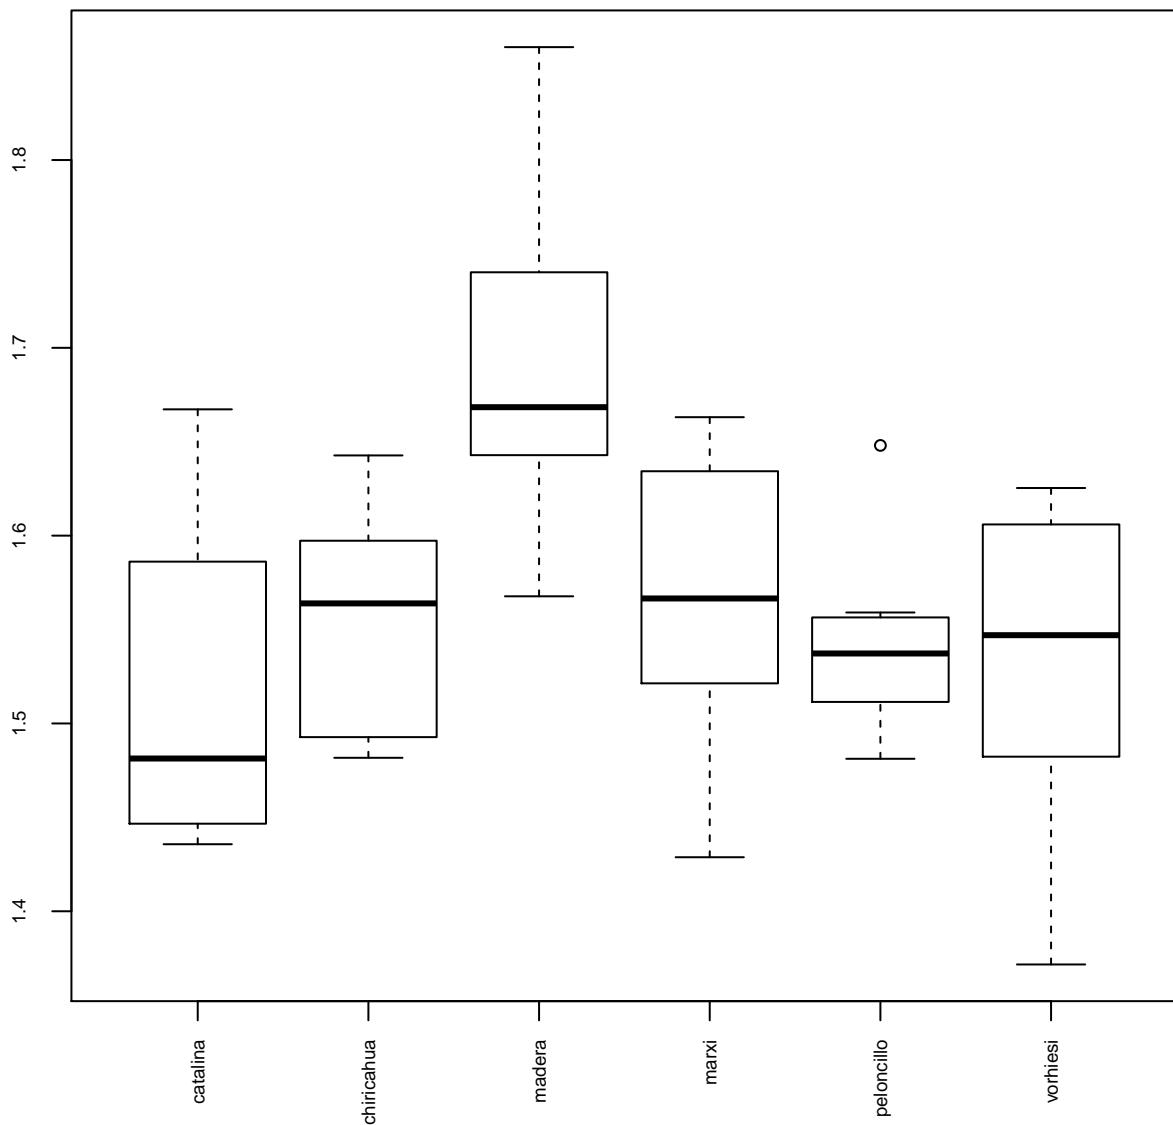

Supplement: Supplementary file 268

## Patella 3/Tarsus 3 ratio – males

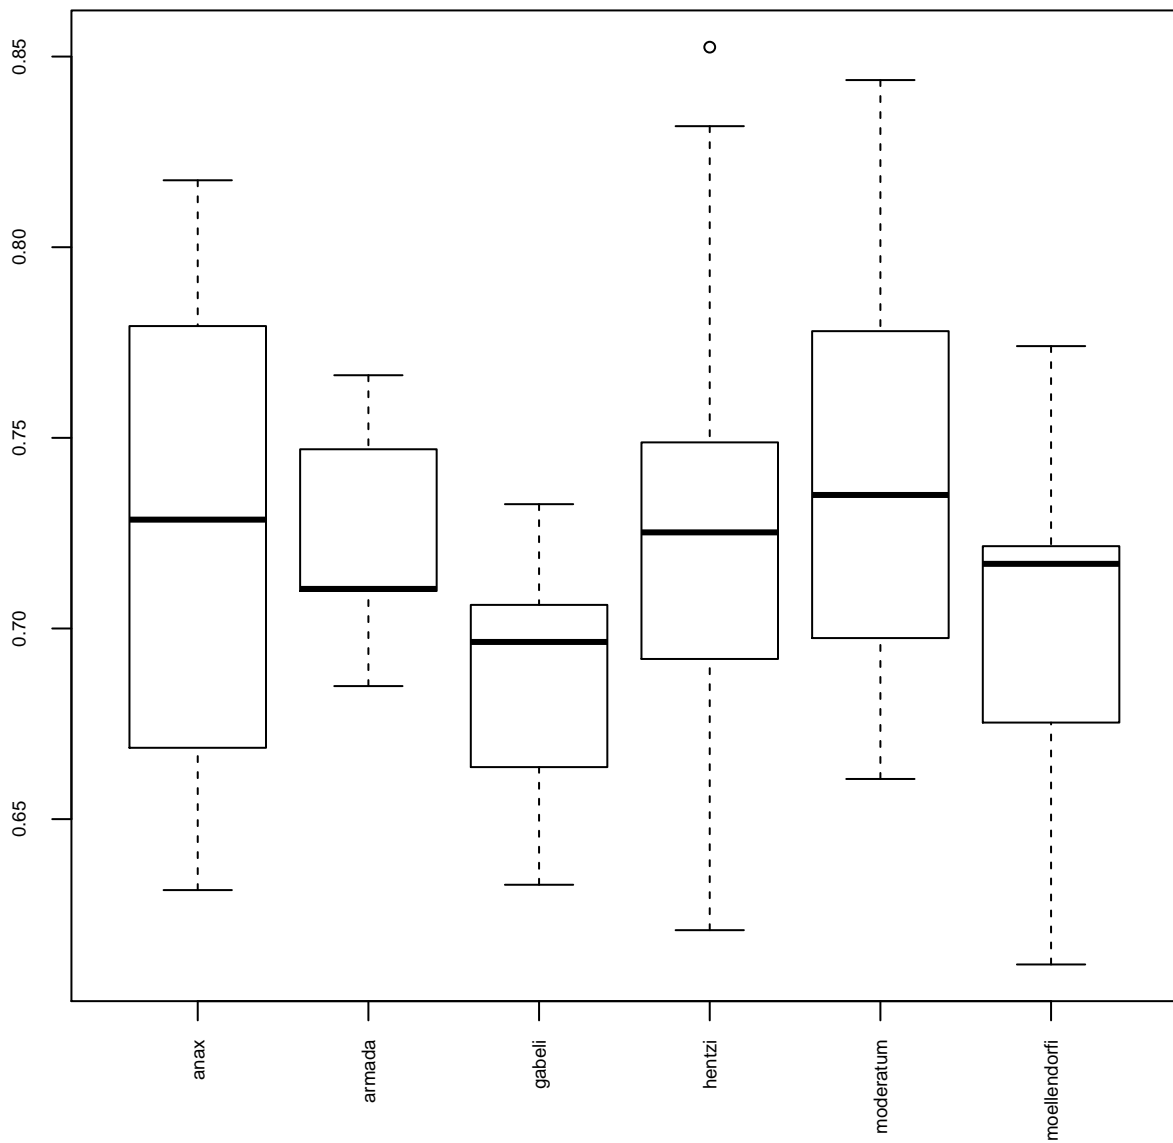

Supplement: Supplementary file 269

## Leg 1 Length – females

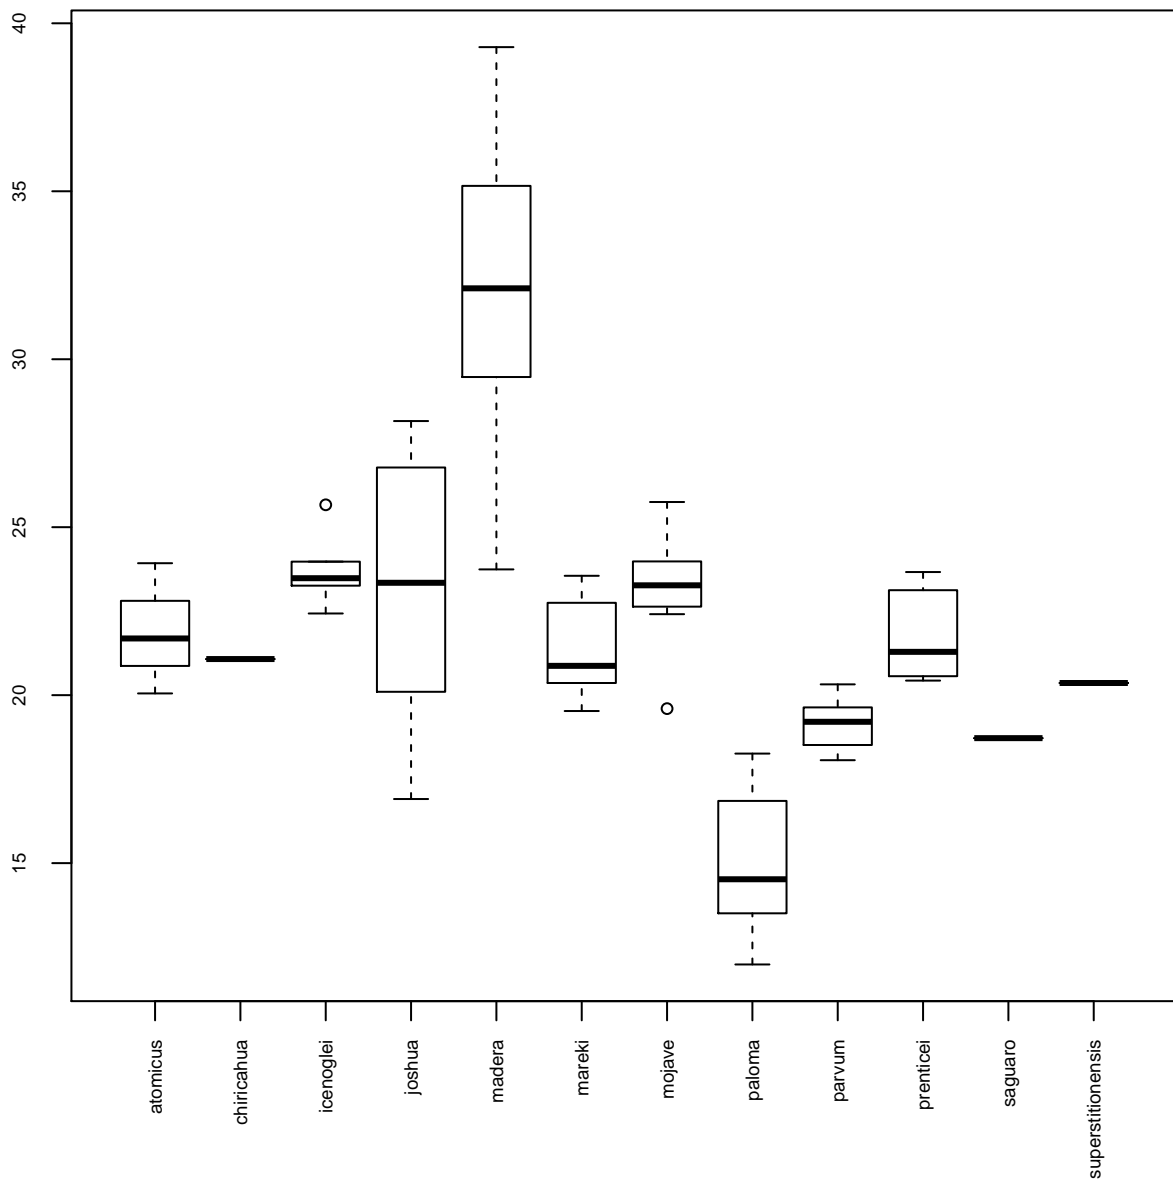

Supplement: Supplementary file 270

# Metatarsus 3/Patella 4 Length ratio – males

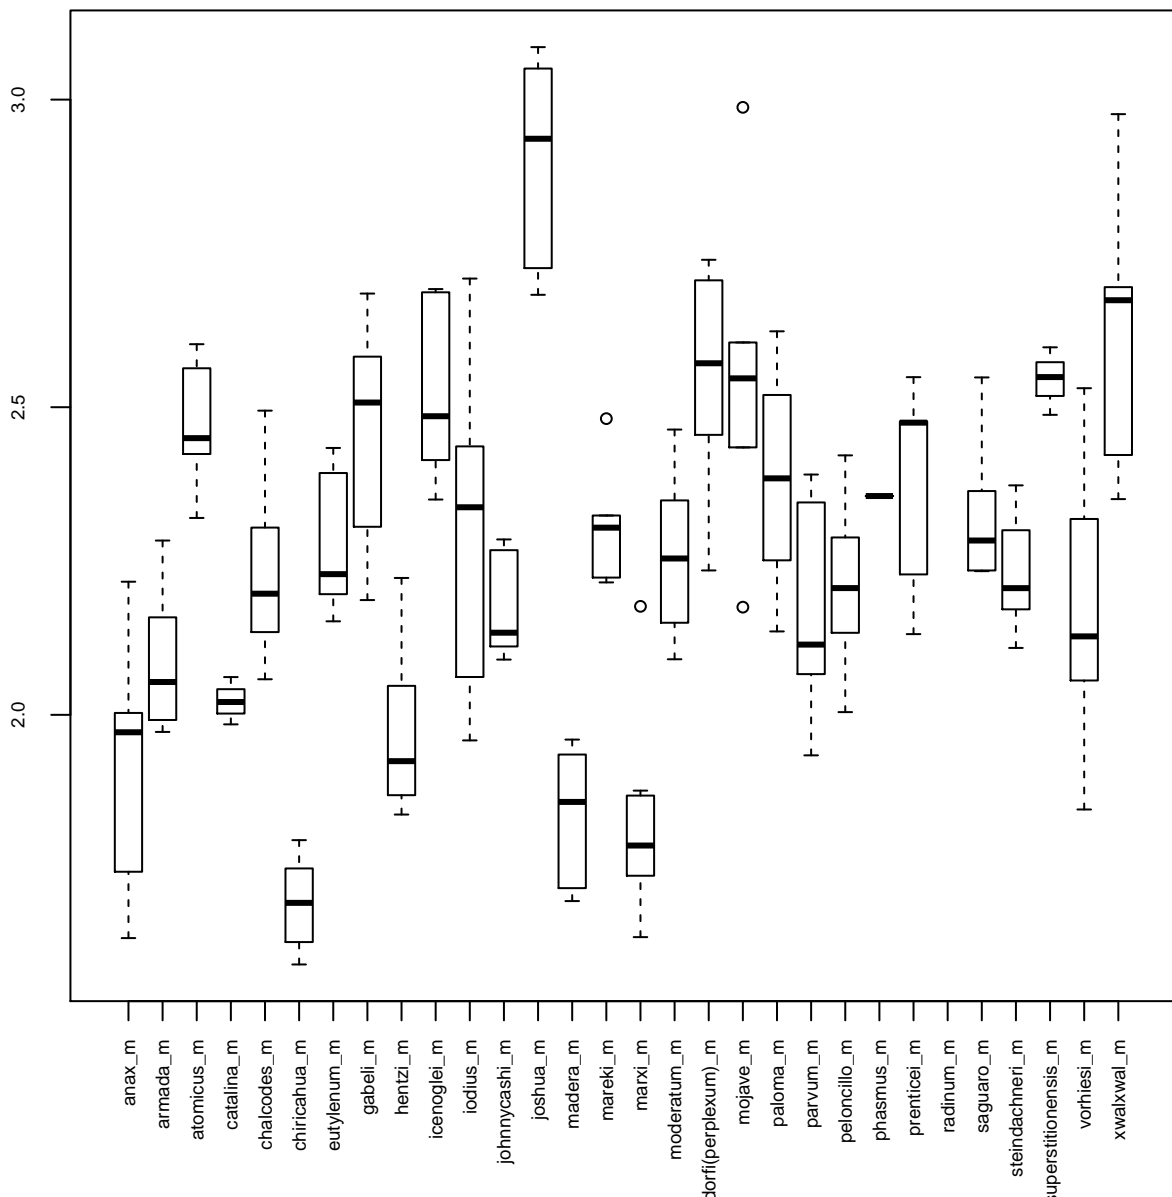

Supplement: Supplementary file 271

## Femur 1/Tibia 3 ratio – males

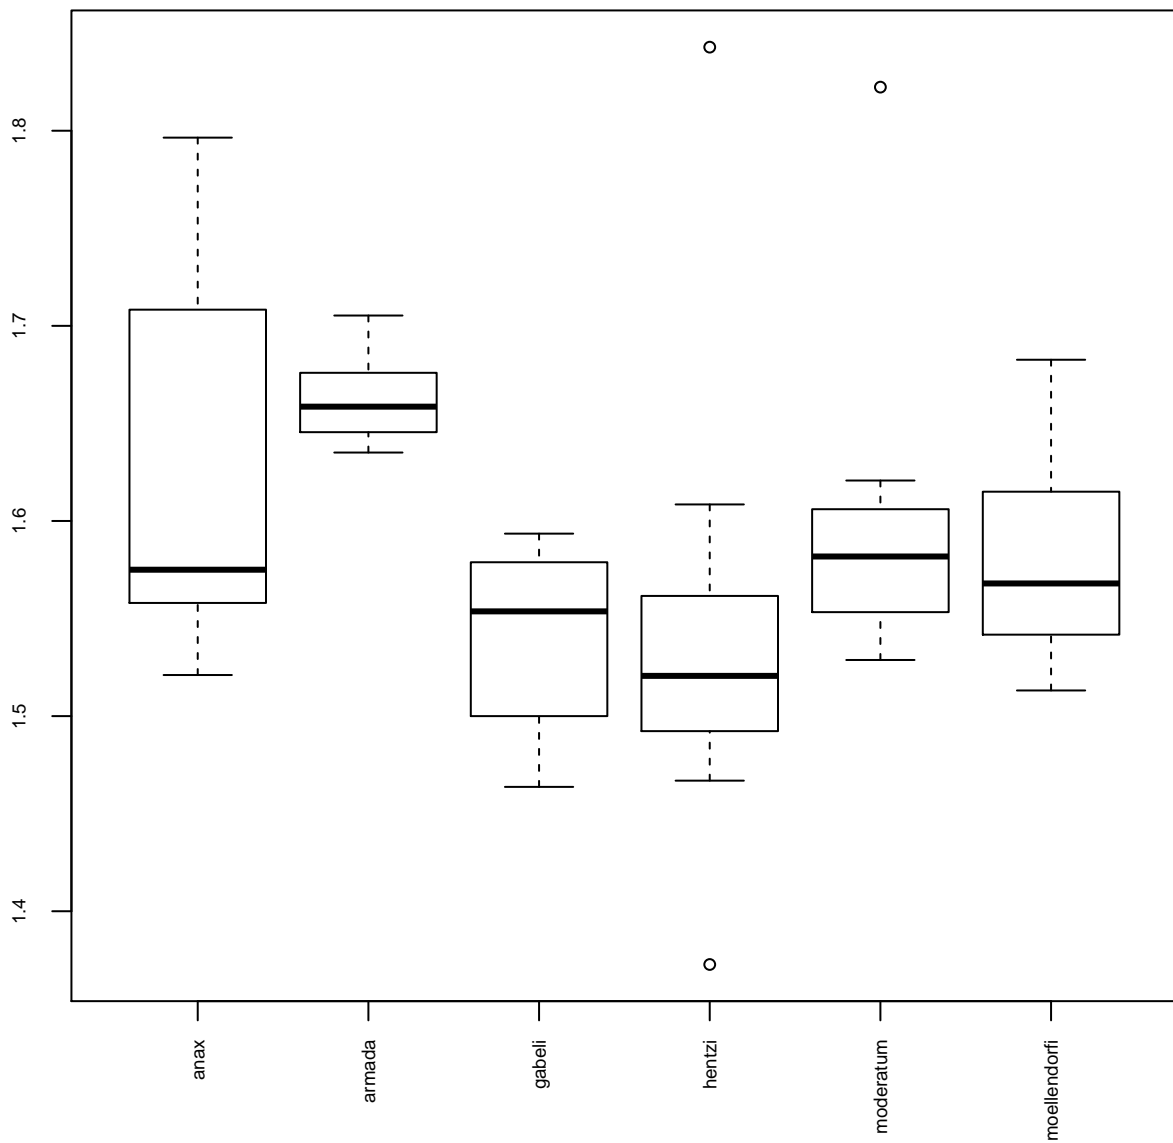

Supplement: Supplementary file 272

## Femur 3/Metatarsus 4 Length ratio – males

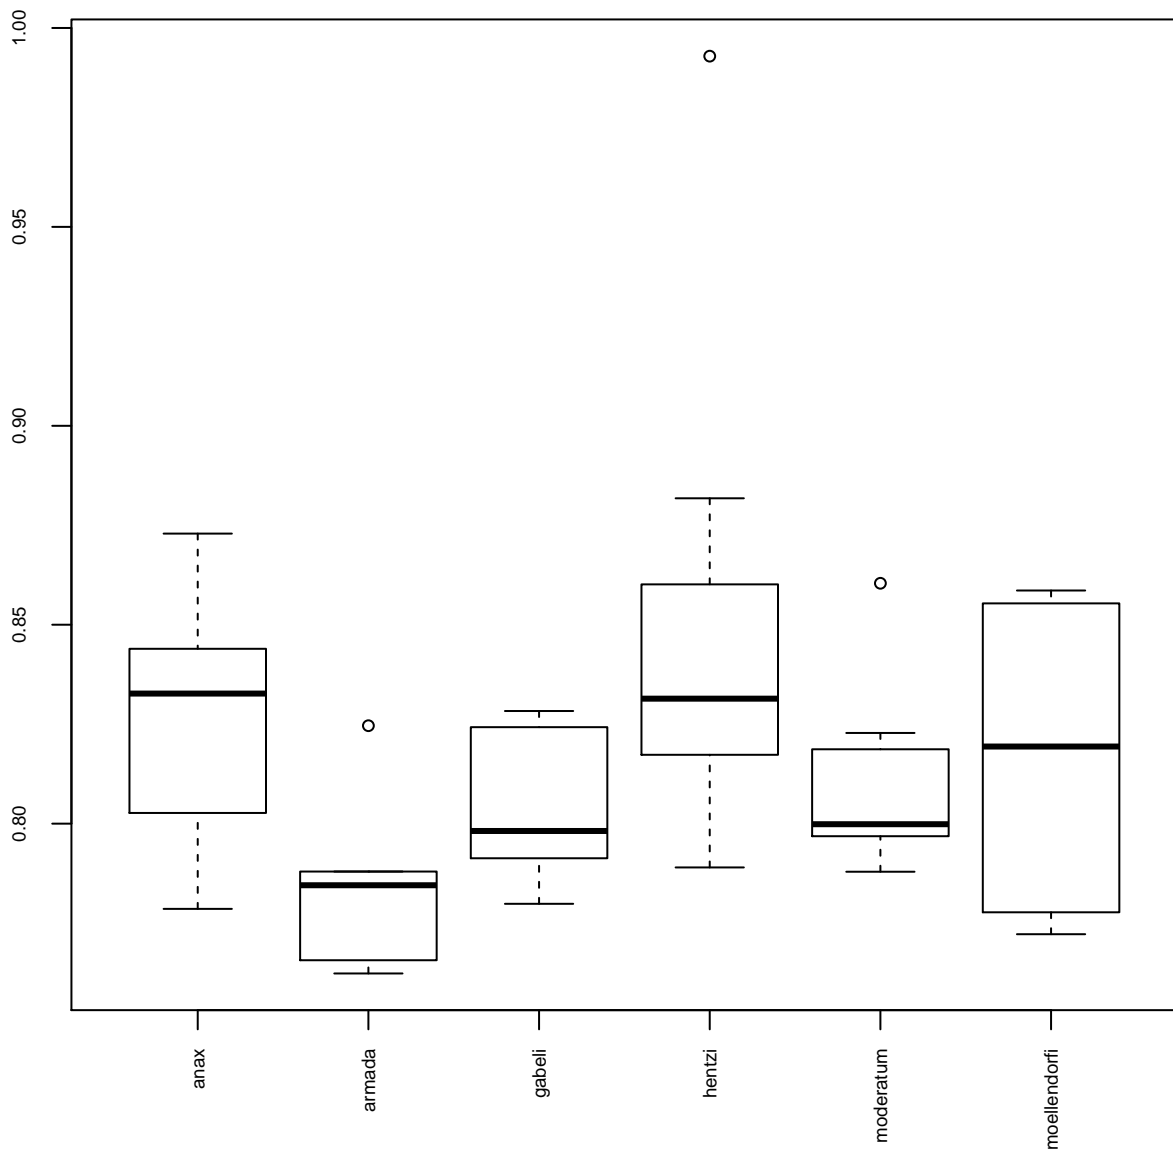

Supplement: Supplementary file 273

# Carapace Width – females

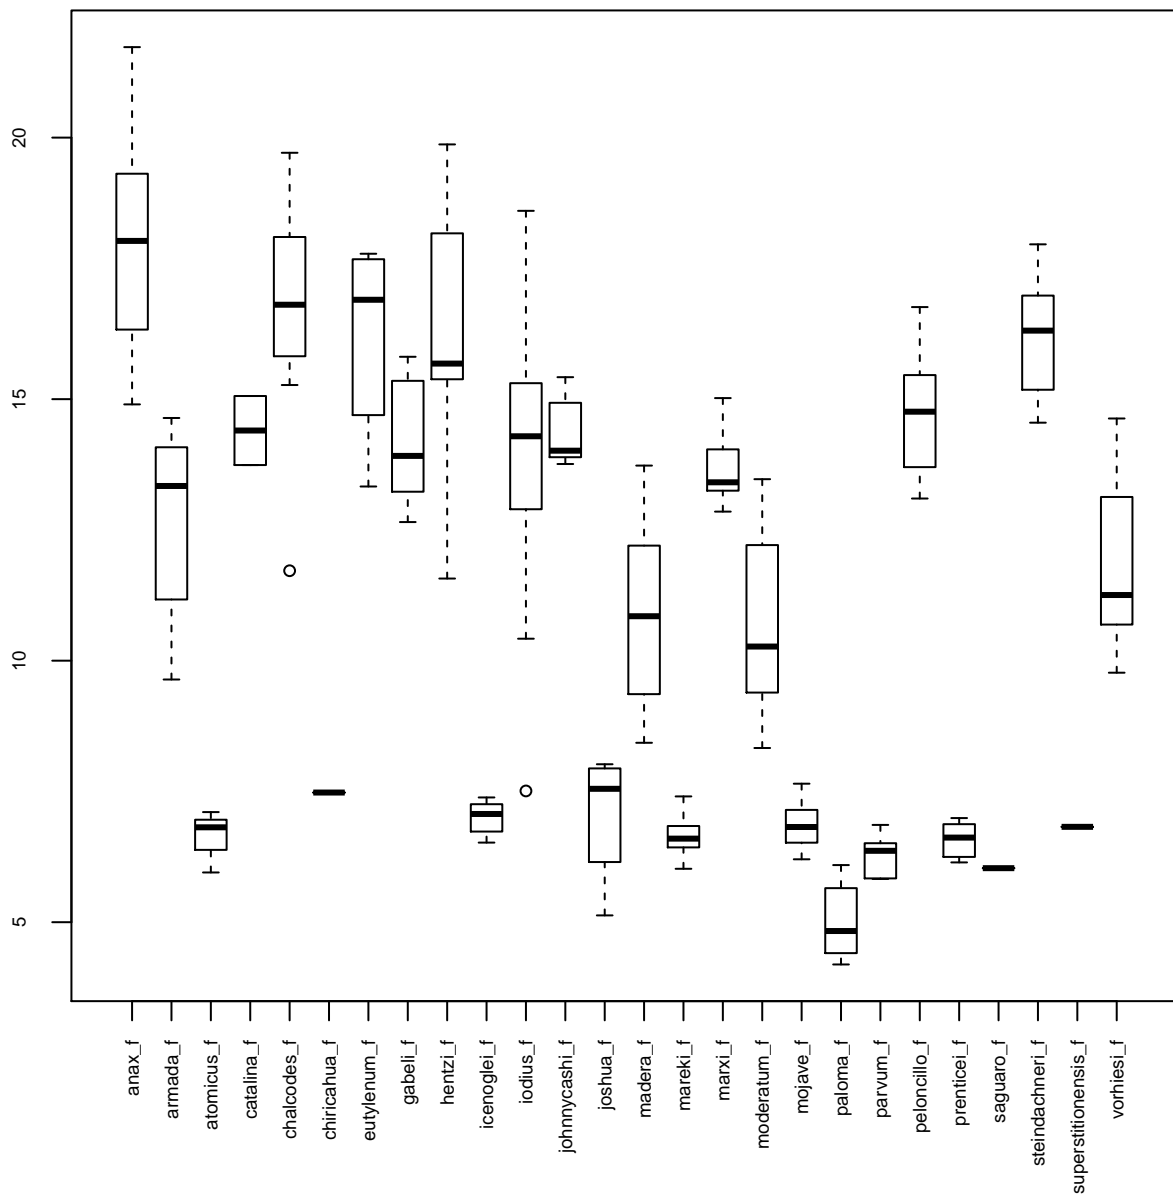

Supplement: Supplementary file 274

# Carapace Length/Palpal Tibia Width ratio – males

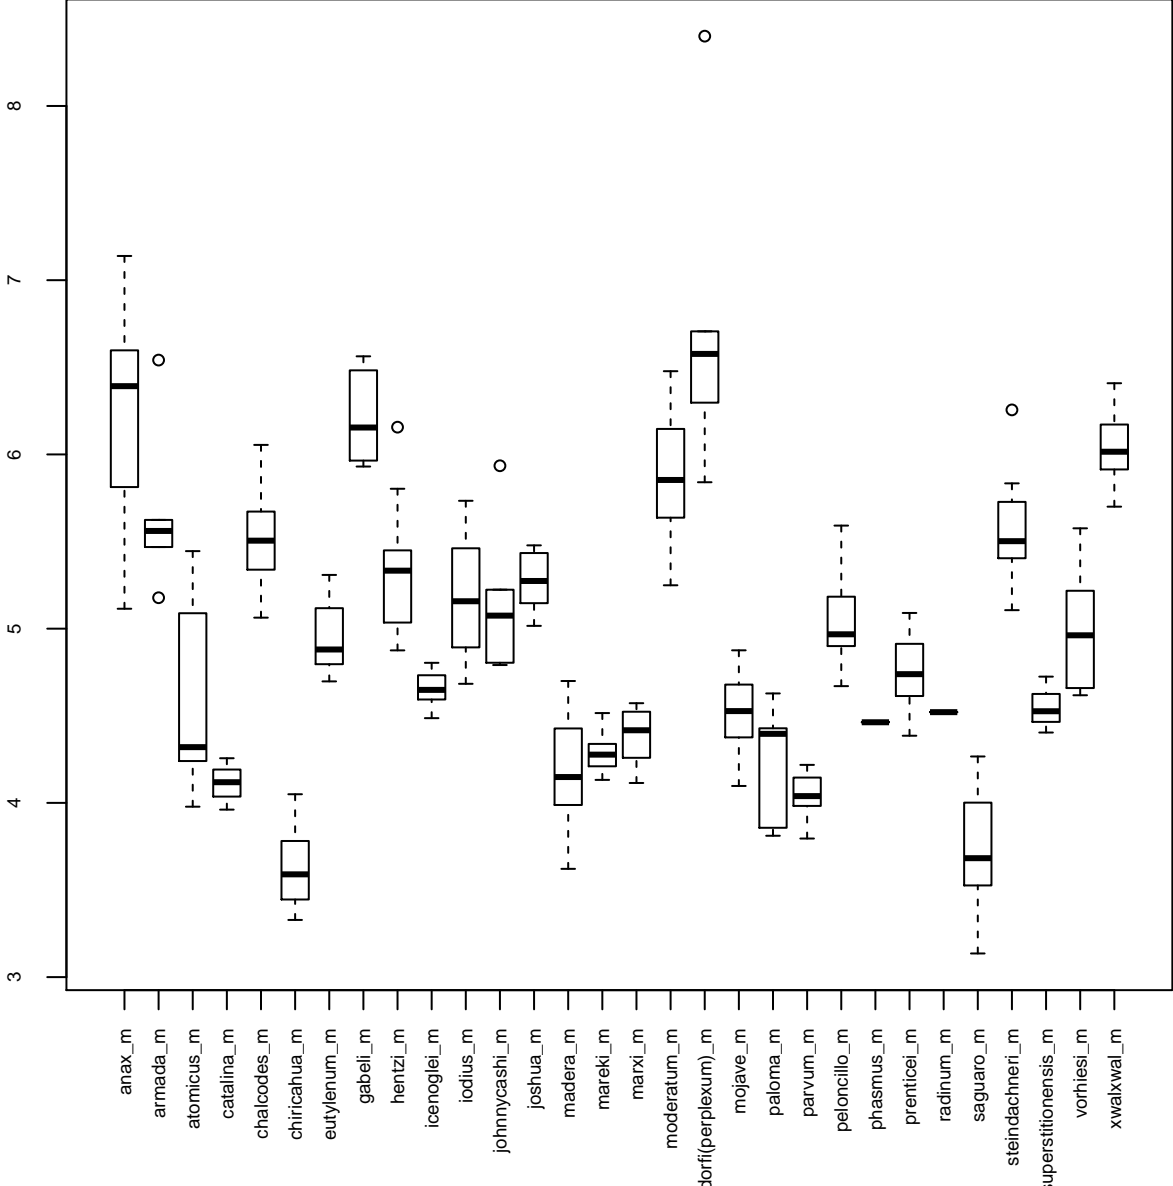

Supplement: Supplementary file 275

## Femur 1/Patella 3 ratio – females

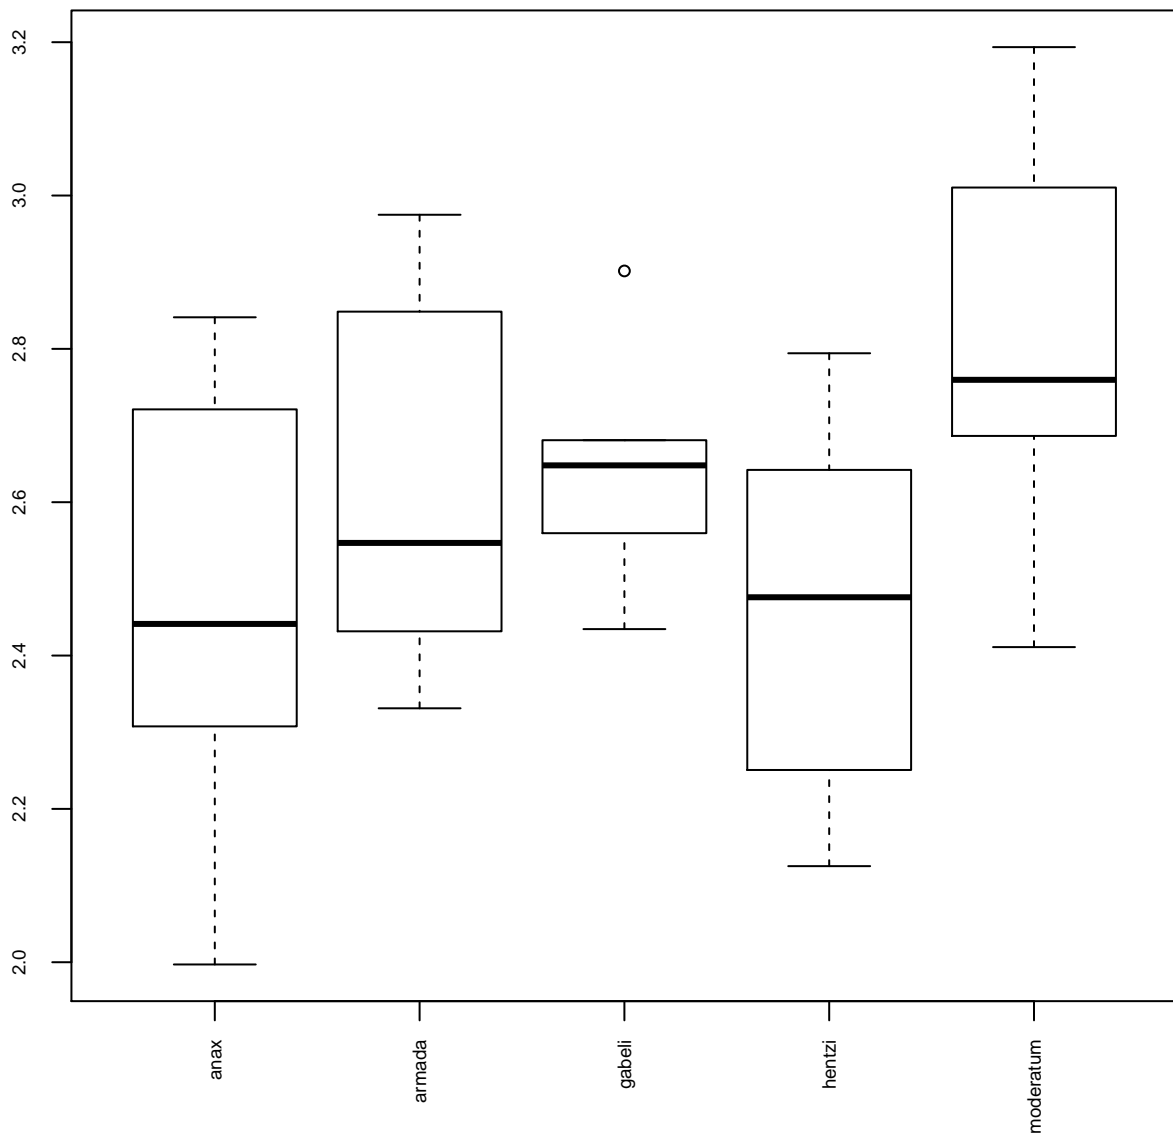

Supplement: Supplementary file 276

## Femur 3/Metatarsus 3 ratio – males

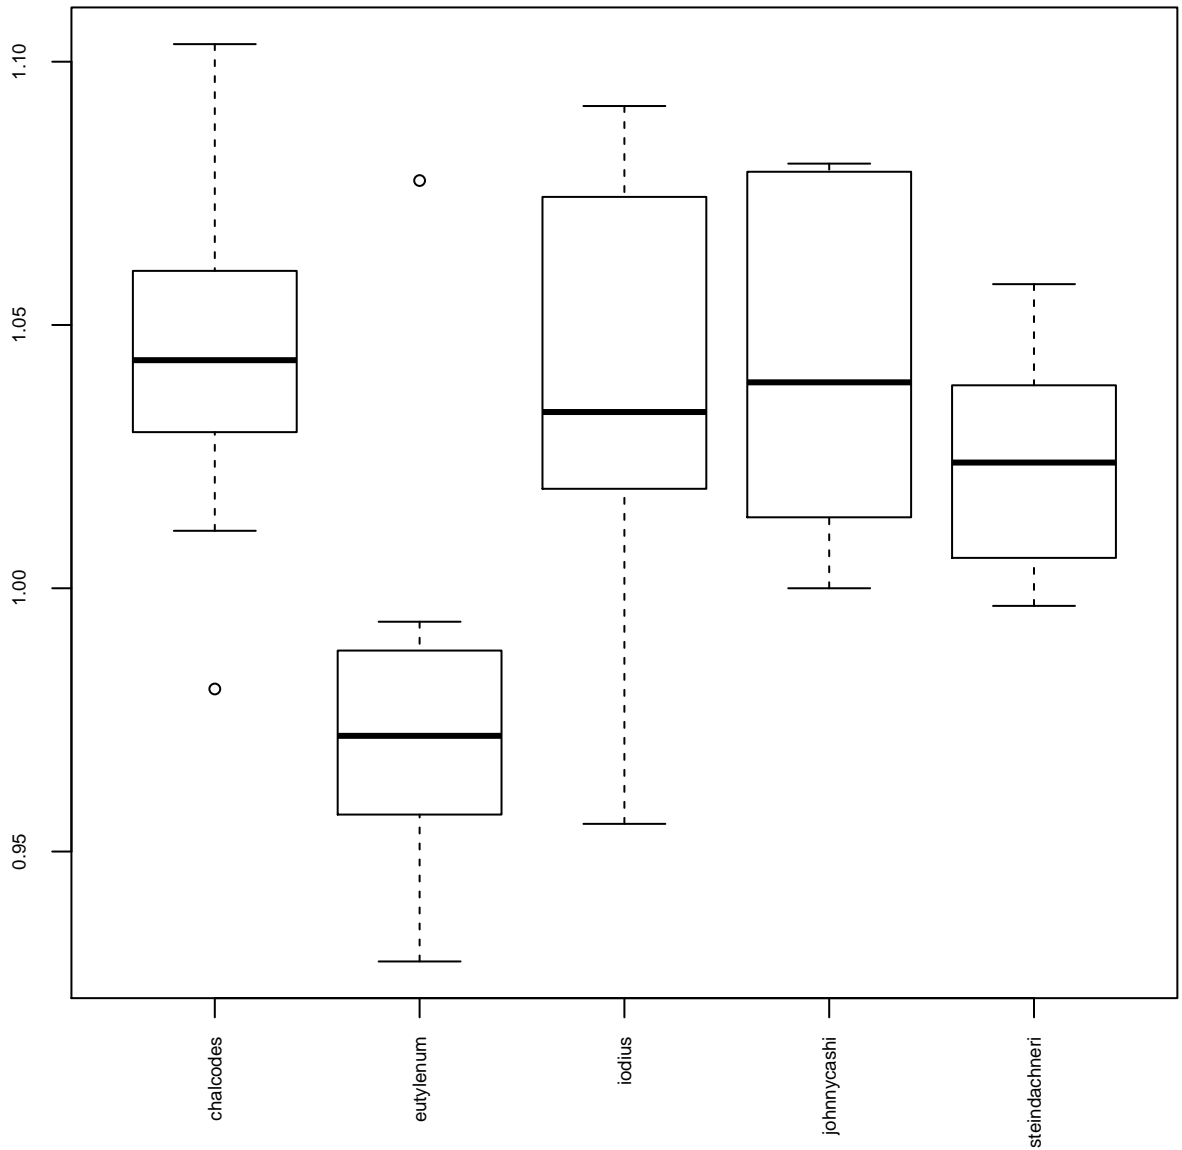

Supplement: Supplementary file 277

## Metatarsus 1/Tarsus 4 Length ratio – females

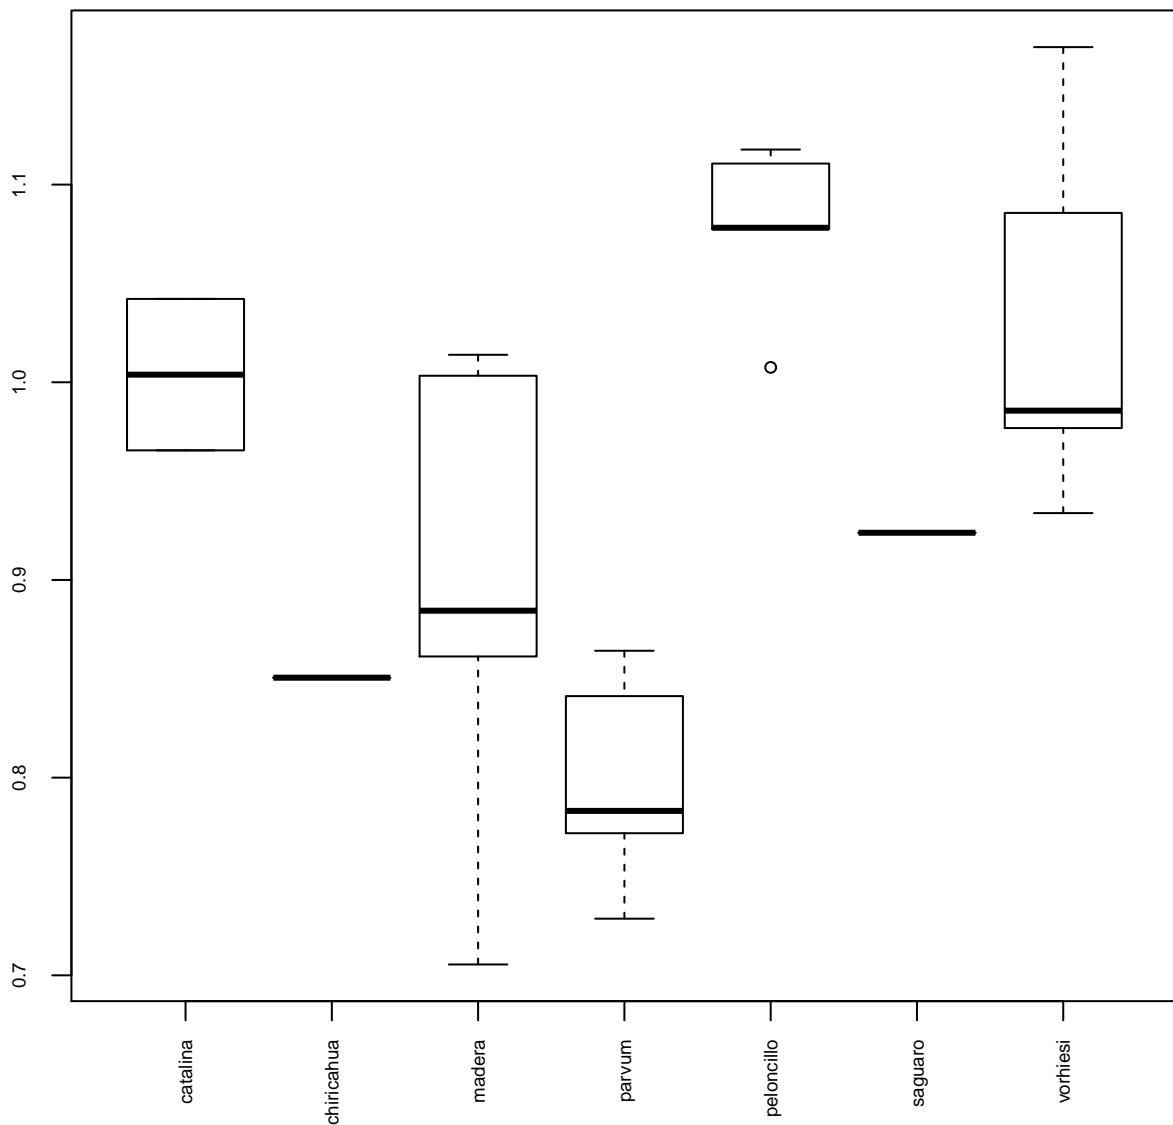

Supplement: Supplementary file 278

## Femur 3/Metatarsus 3 ratio – males

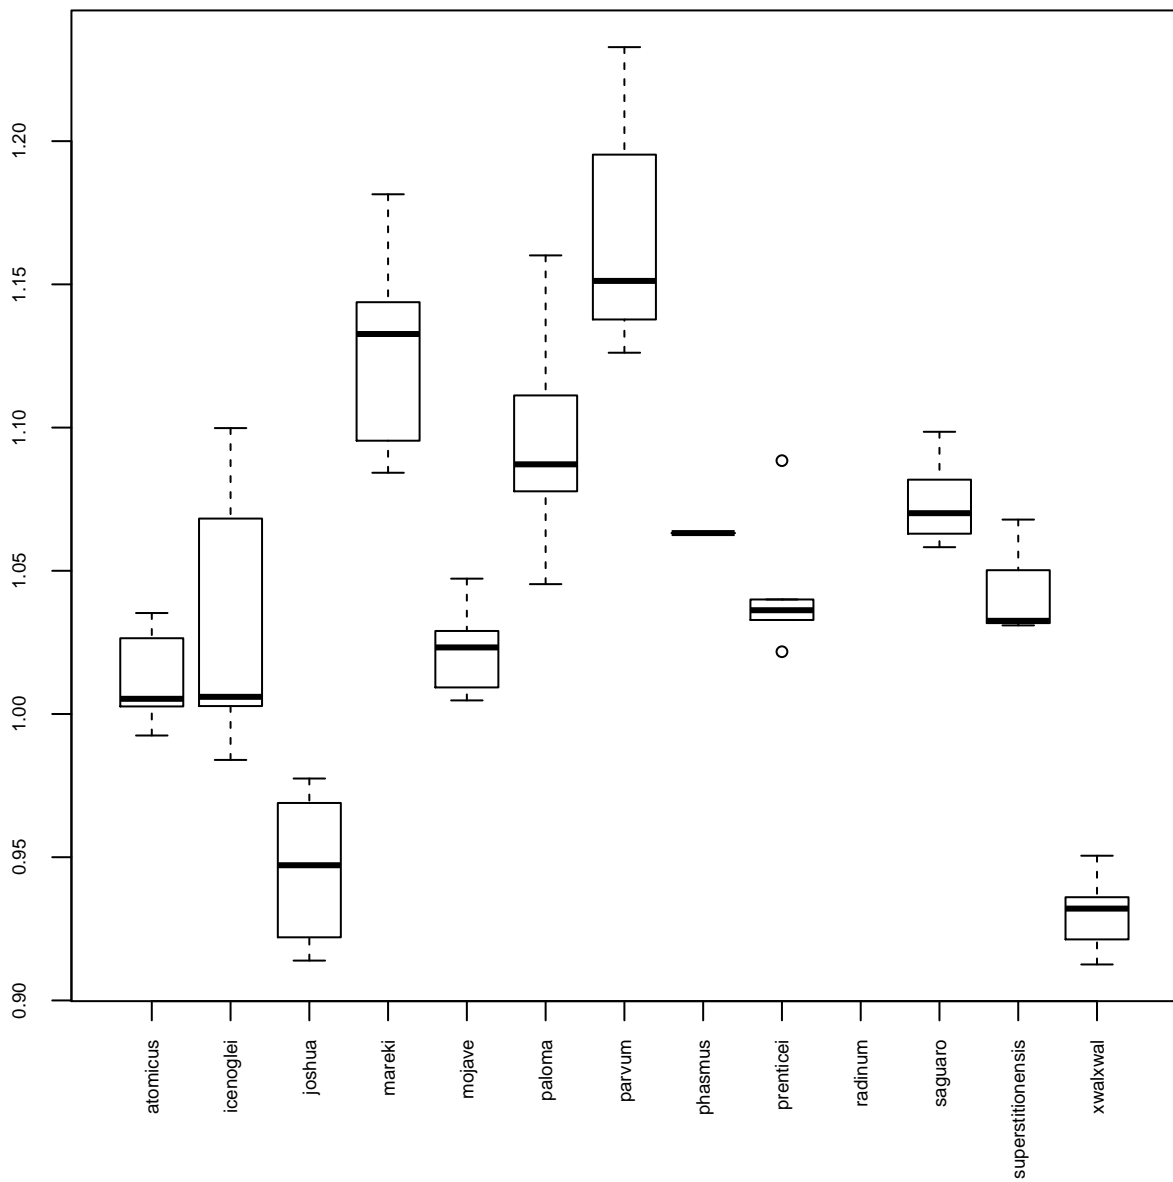

Supplement: Supplementary file 279

## Tarsus 1/Patella 4 Length ratio – females

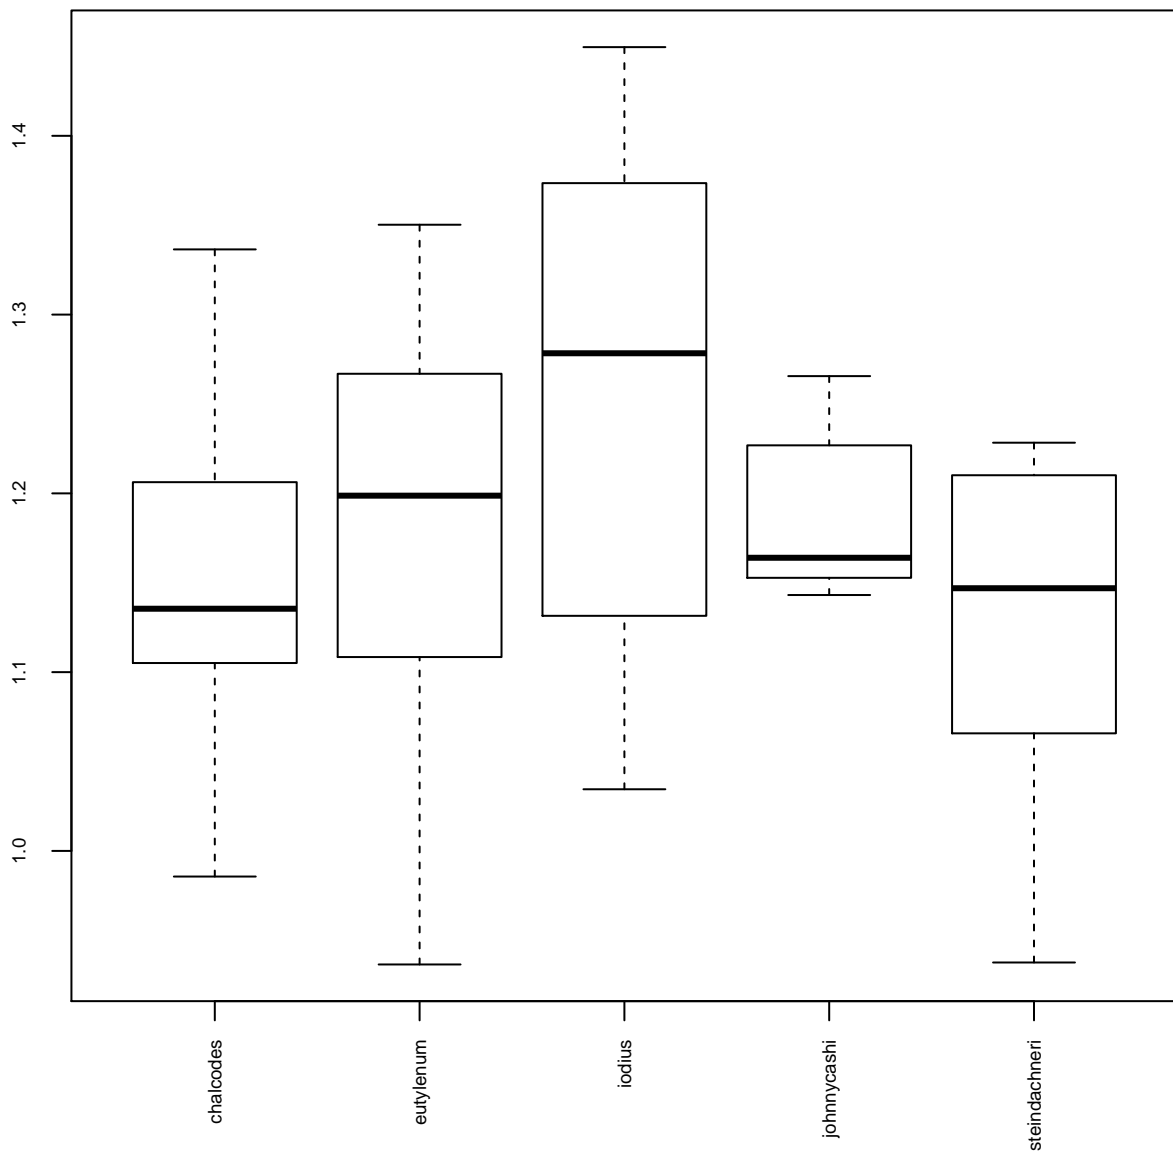

Supplement: Supplementary file 280

## Carapace Length/Tibia 1 ratio – females

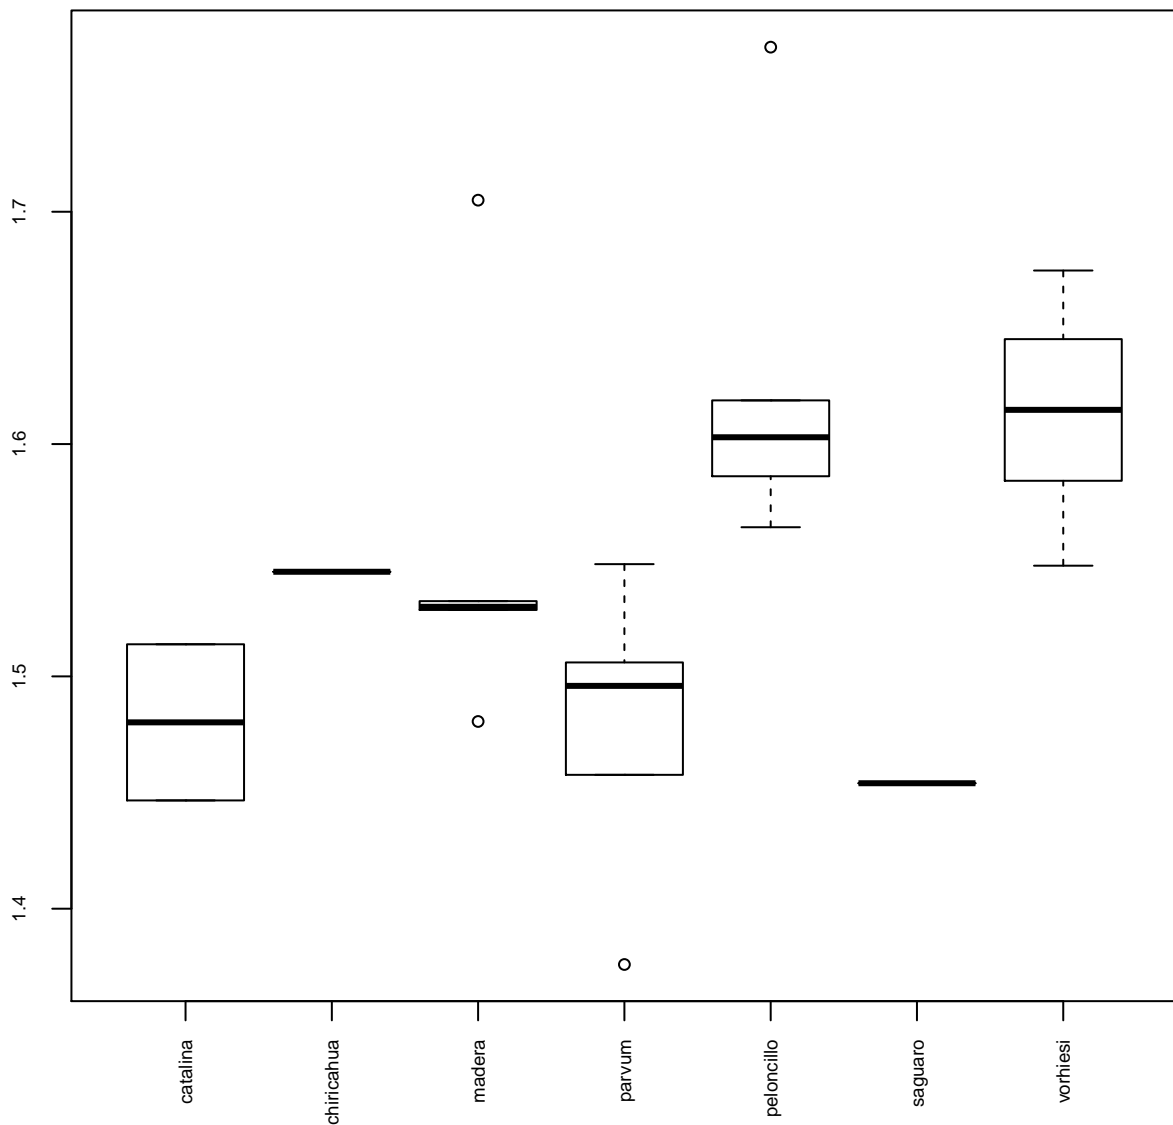

Supplement: Supplementary file 281

## Femur 1/Metatarsus 3 ratio – females

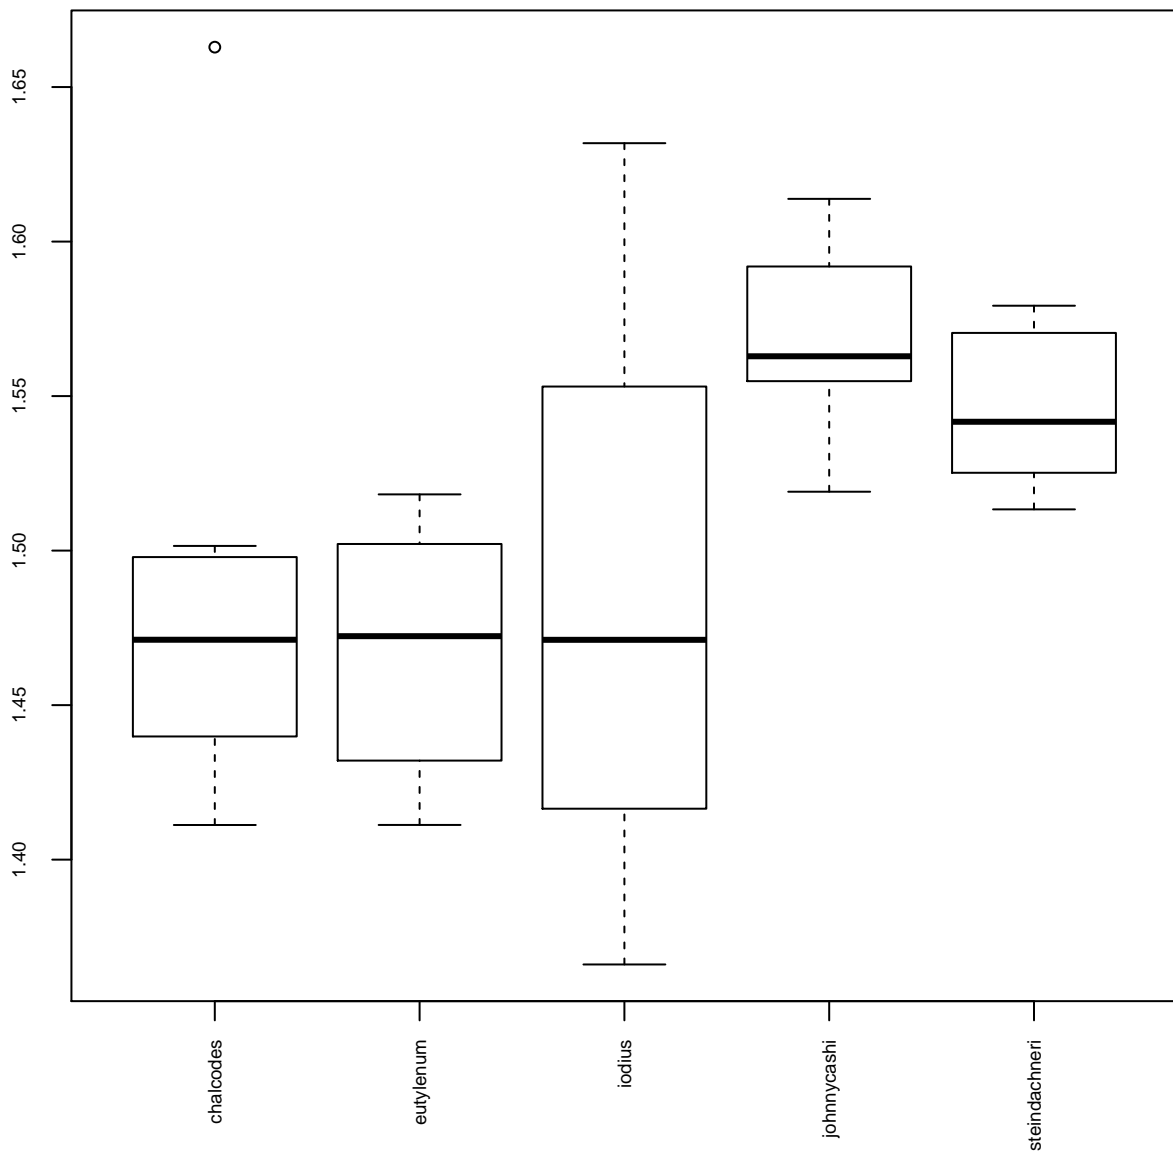

Supplement: Supplementary file 282

## Metatarsus 1/Tibia 4 Length ratio – males

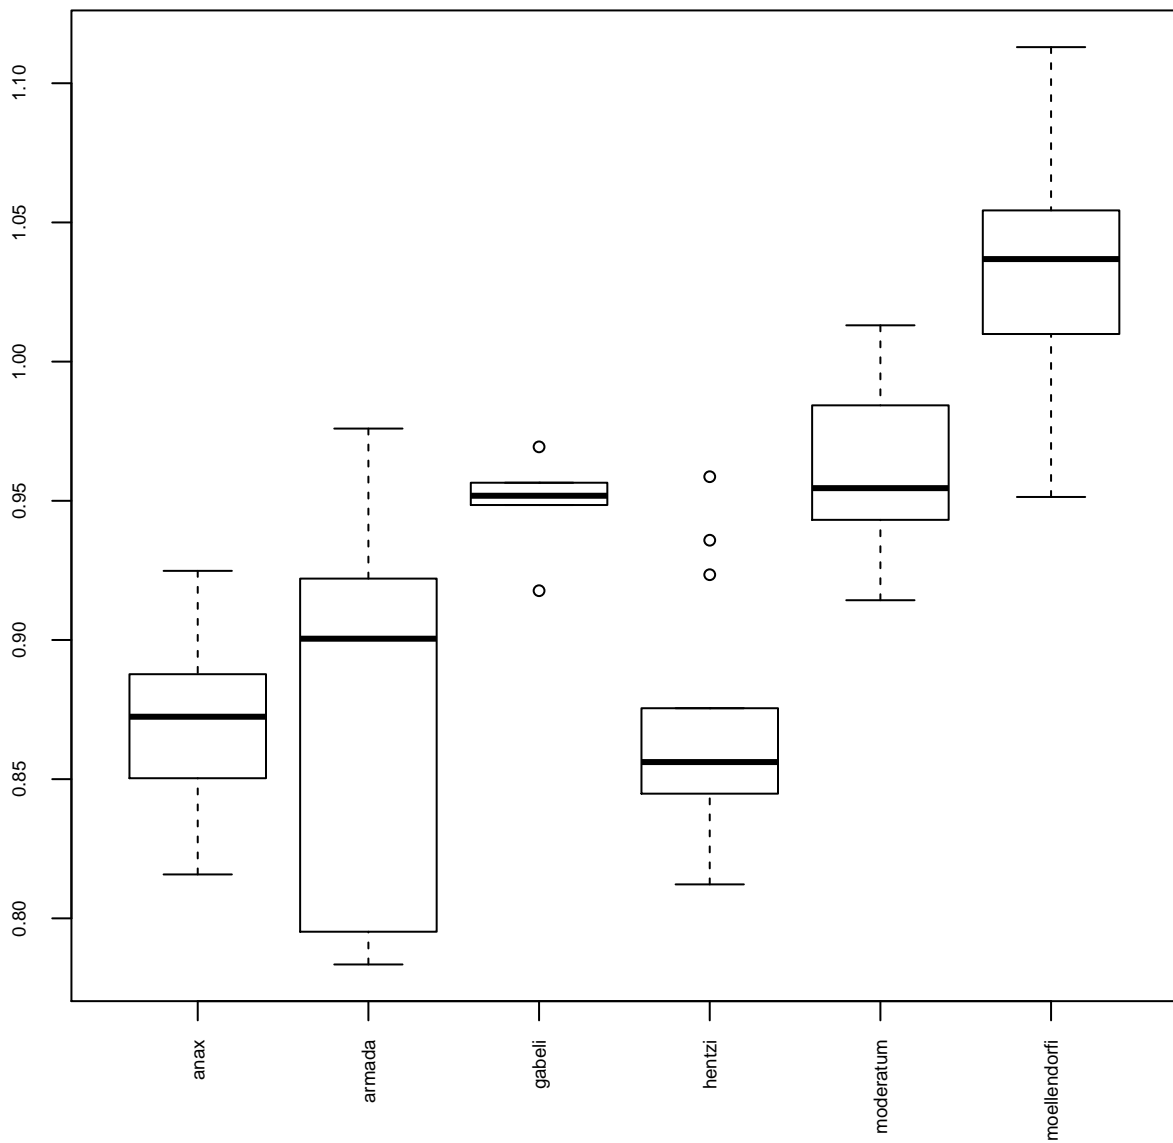

Supplement: Supplementary file 283

## Femur 1/Metatarsus 3 ratio – females

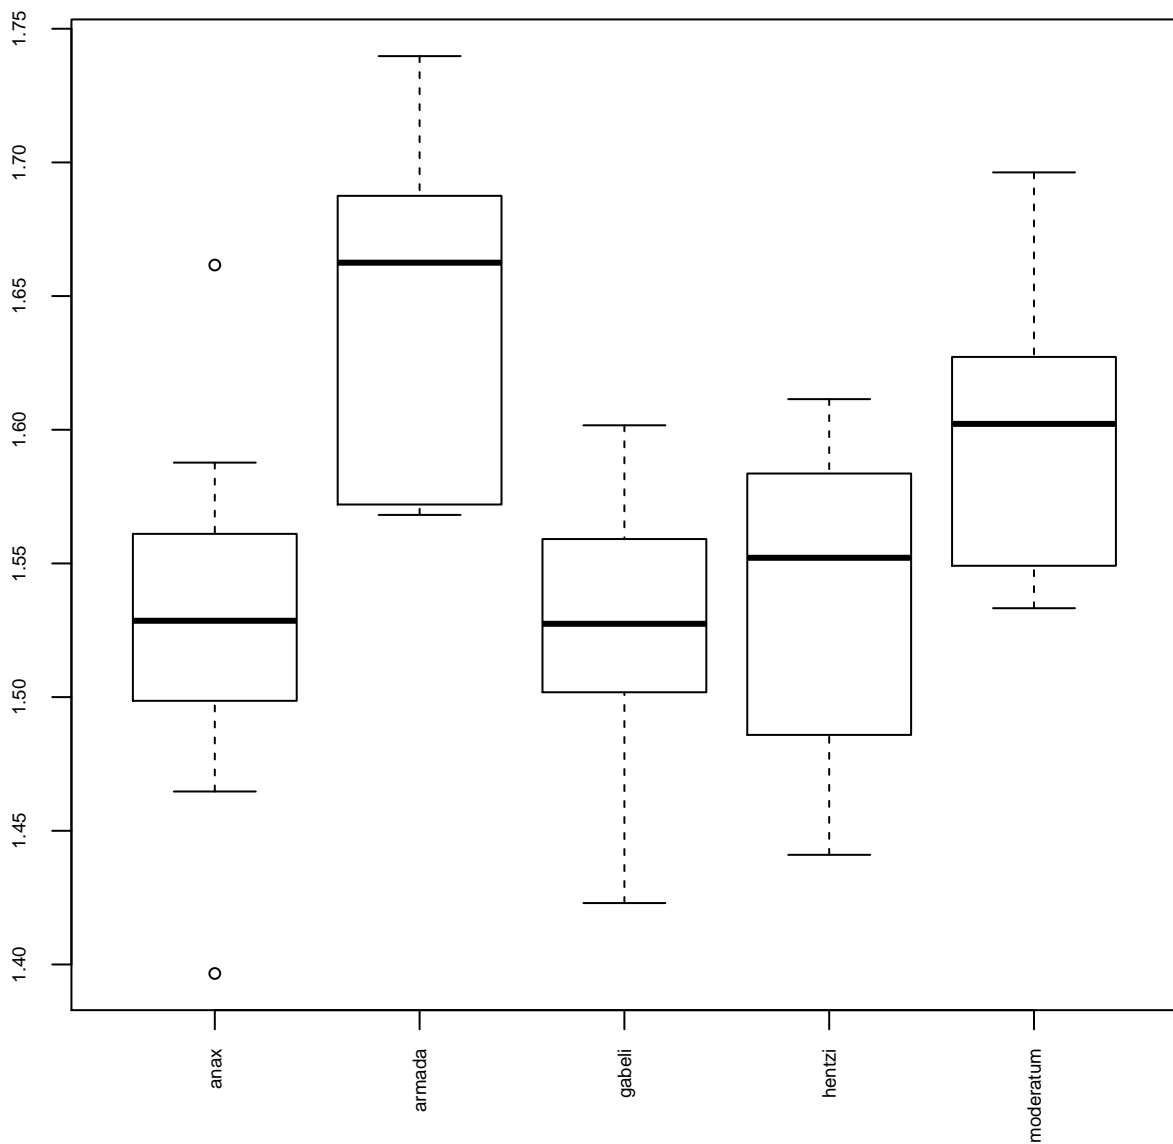

Supplement: Supplementary file 284

### Femur 4/Tibia 4 ratio – males

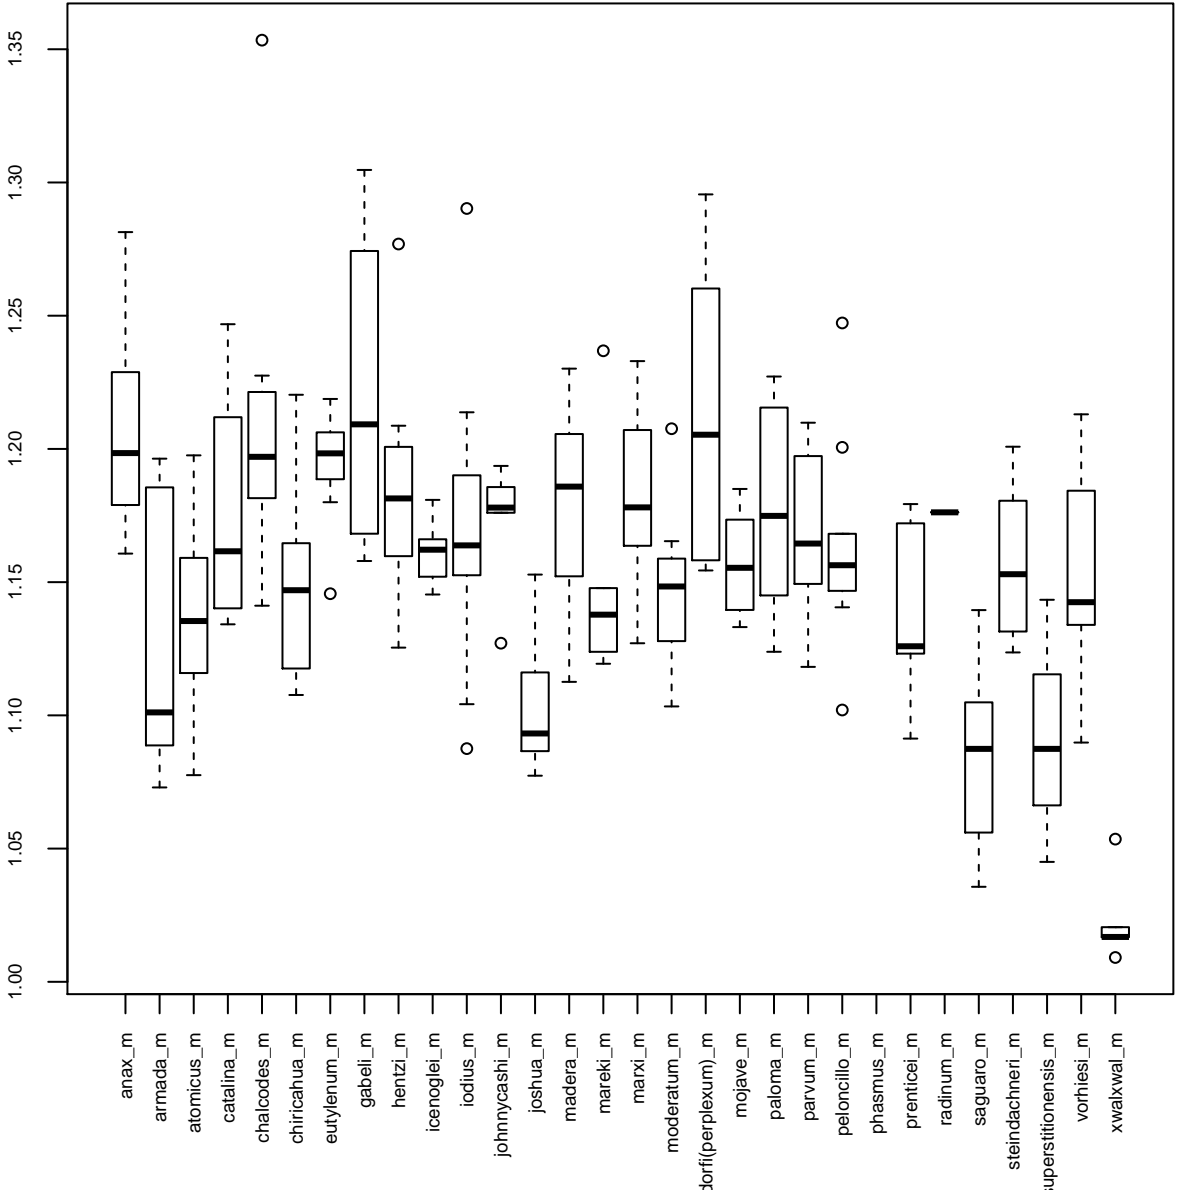

Supplement: Supplementary file 285

# Metatarsus 1/Tarsus 3 Length ratio – females

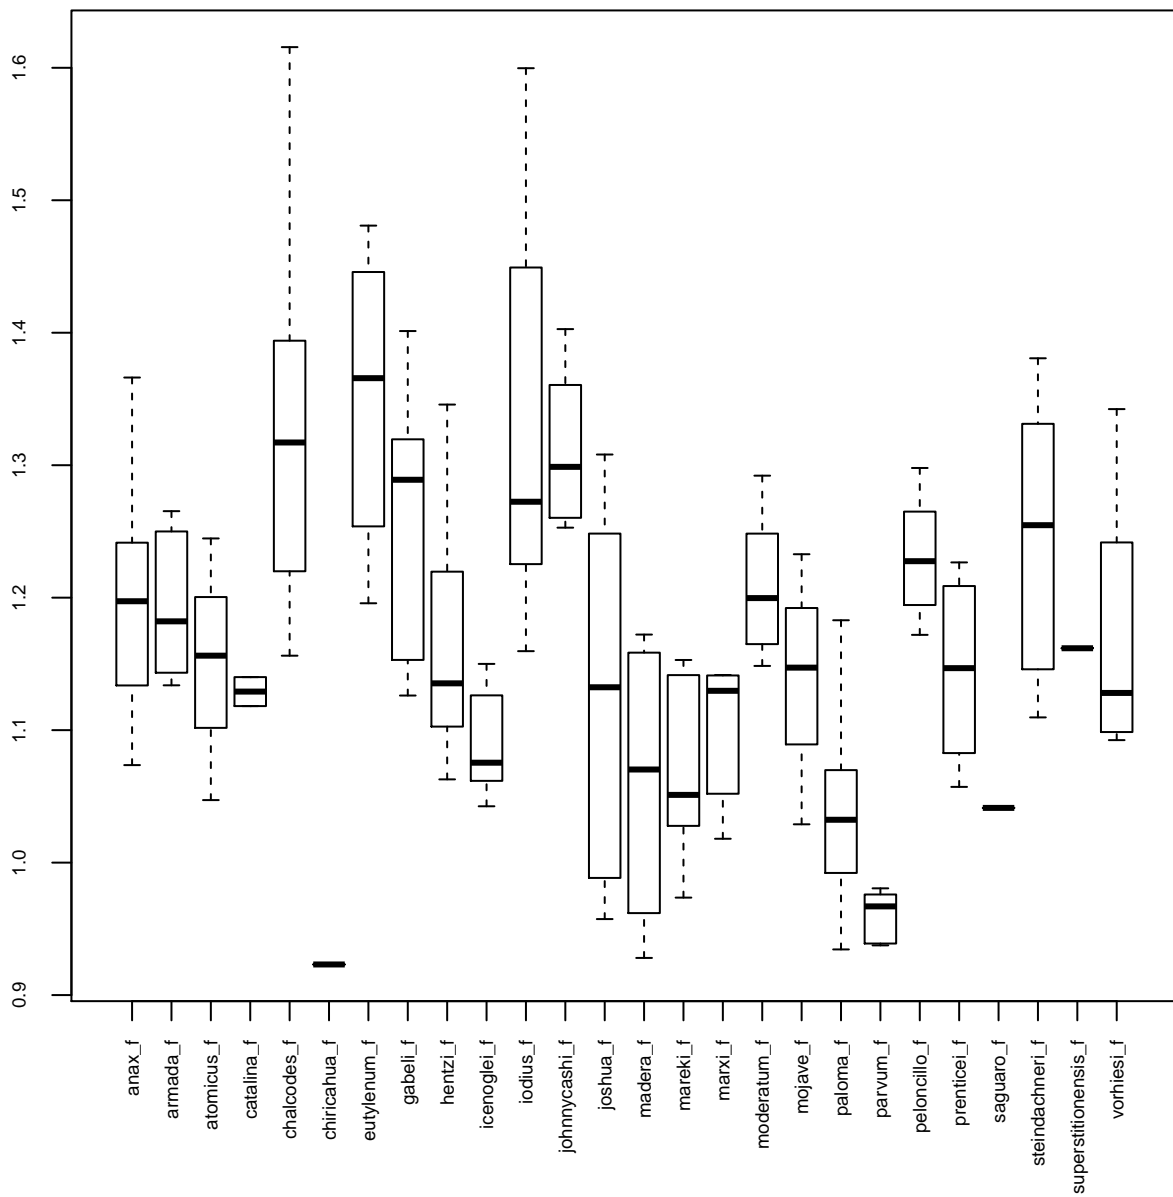

Supplement: Supplementary file 286

## Palpal Tibia Length/Width ratio – males

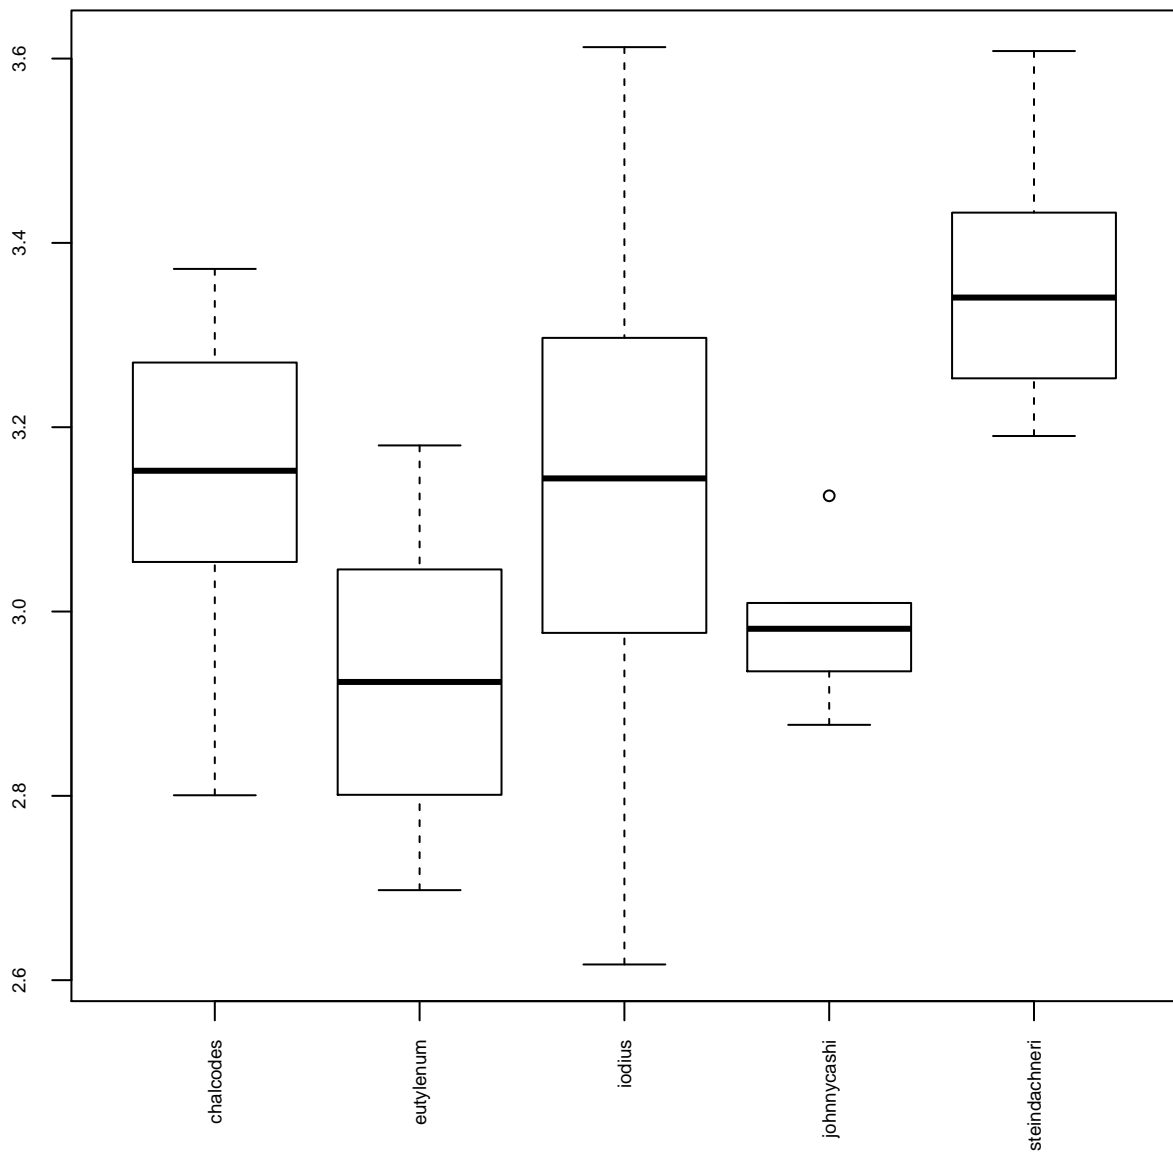

Supplement: Supplementary file 287

## Patella 4/Tibia 4 ratio – males

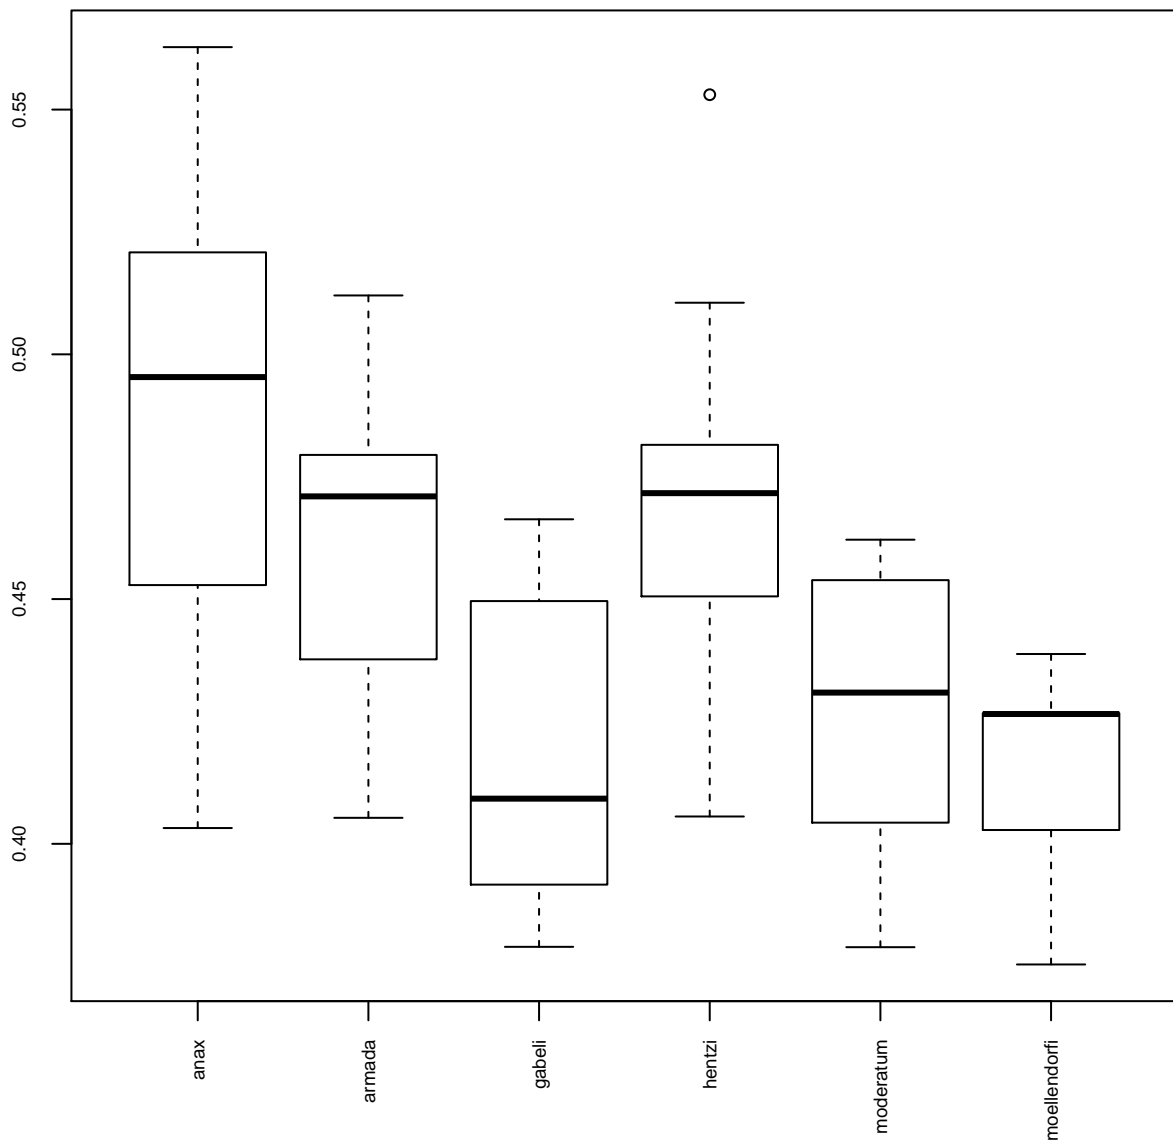

Supplement: Supplementary file 288

## Labial Length/Width ratio – males

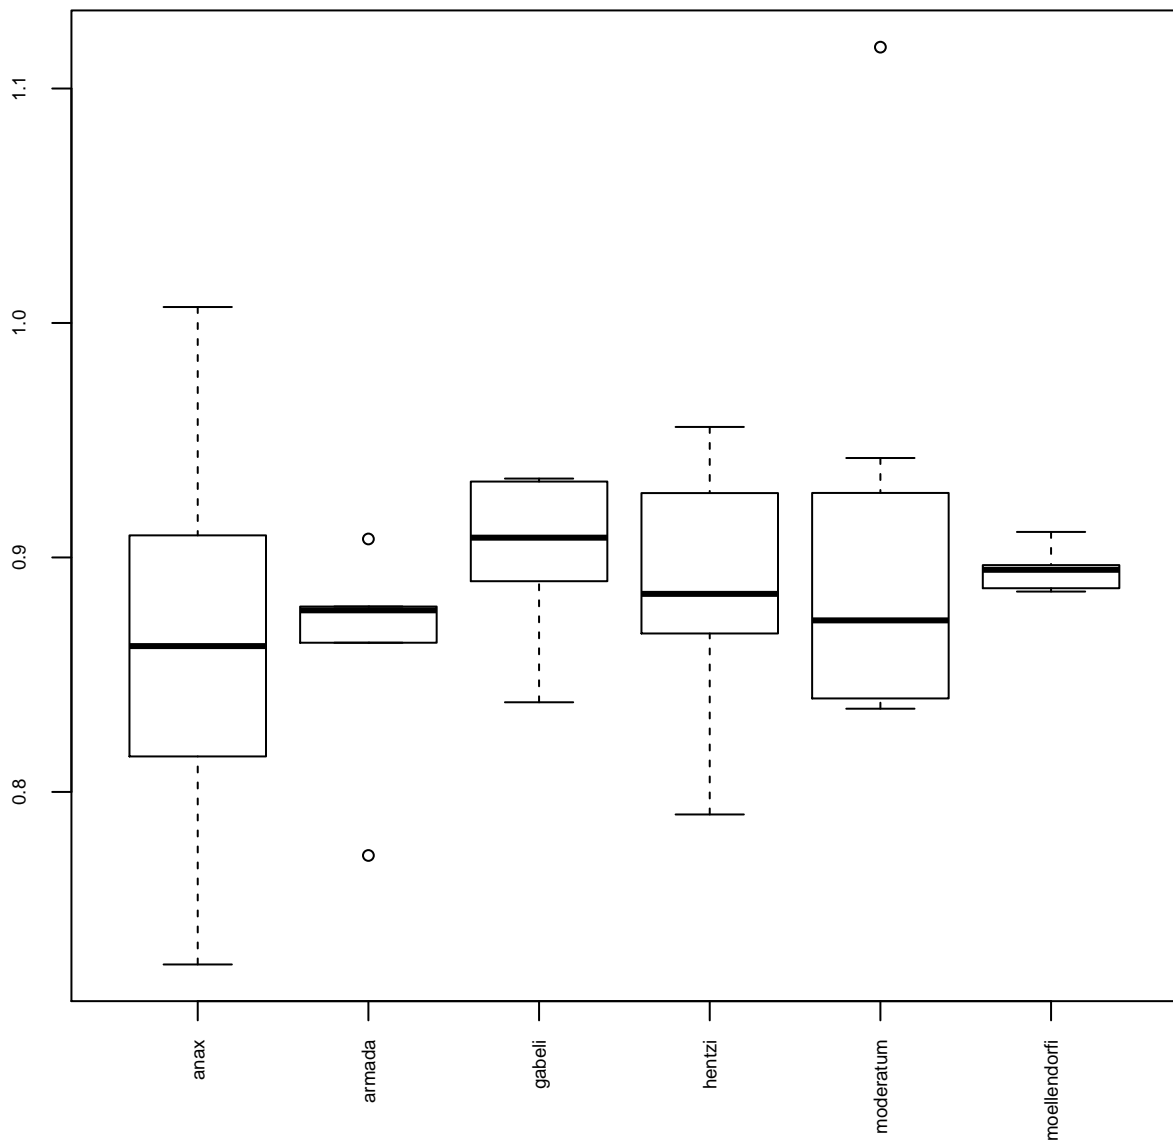

Supplement: Supplementary file 289

## Patella 4/Metatarsus 4 ratio – females

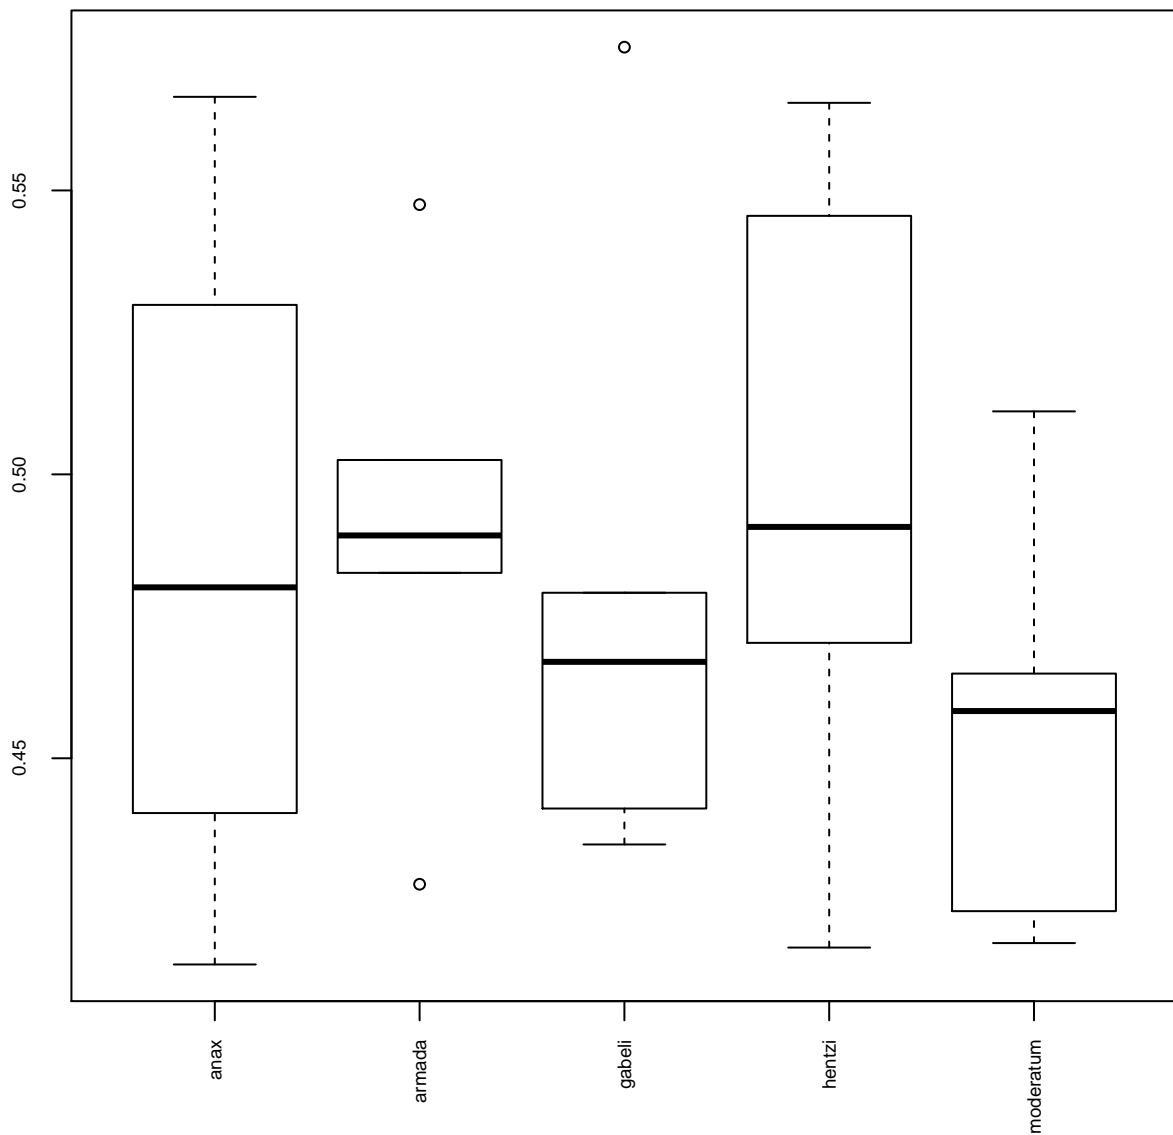

Supplement: Supplementary file 290

## Patella 1/Tibia 4 Length ratio – females

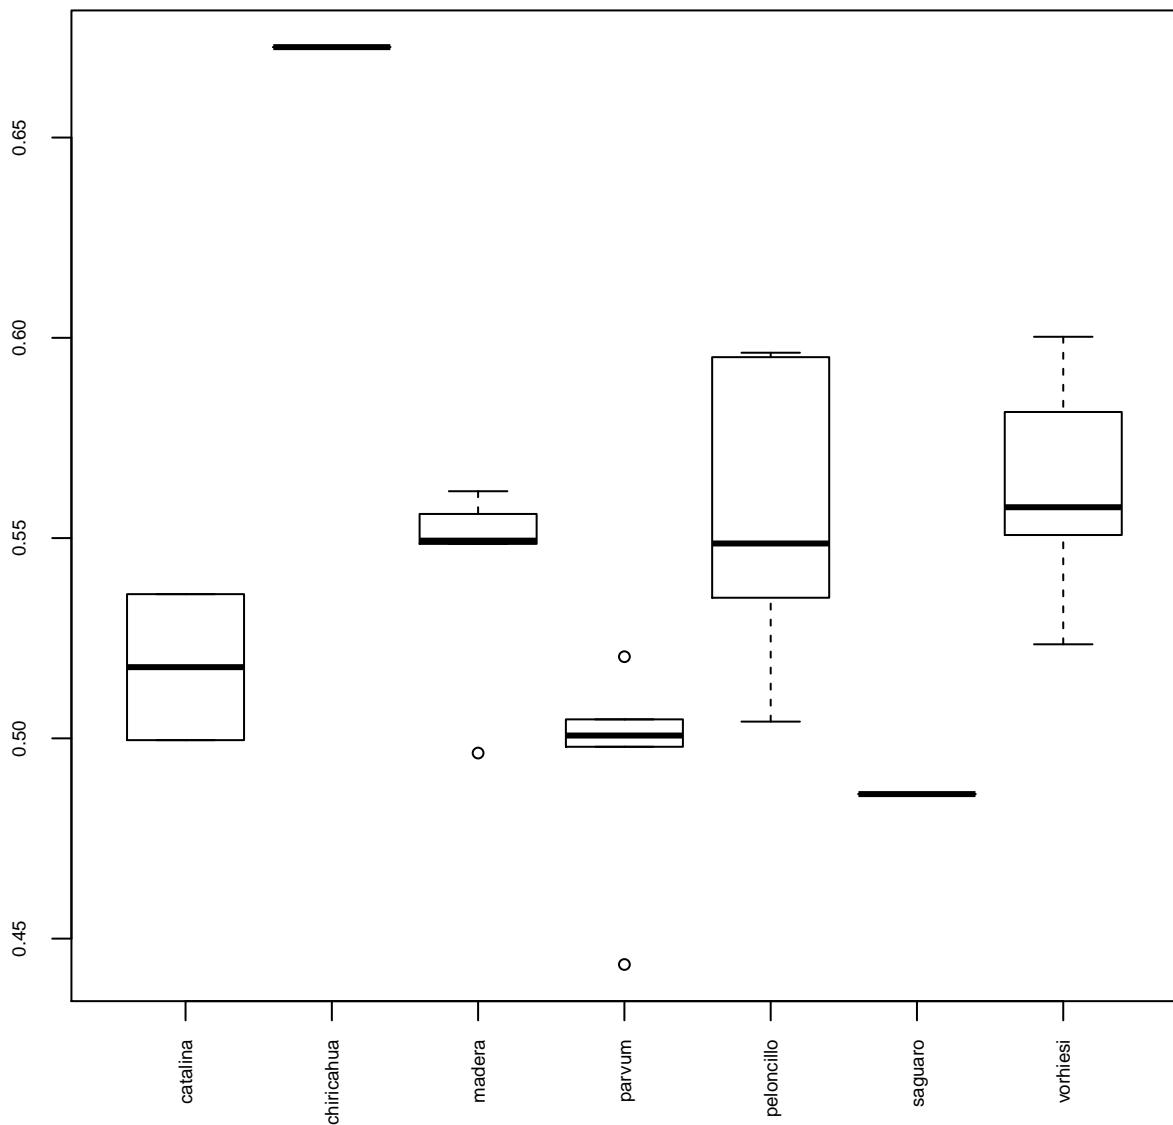

Supplement: Supplementary file 291

## Femur 1/Tarsus 3 ratio – males

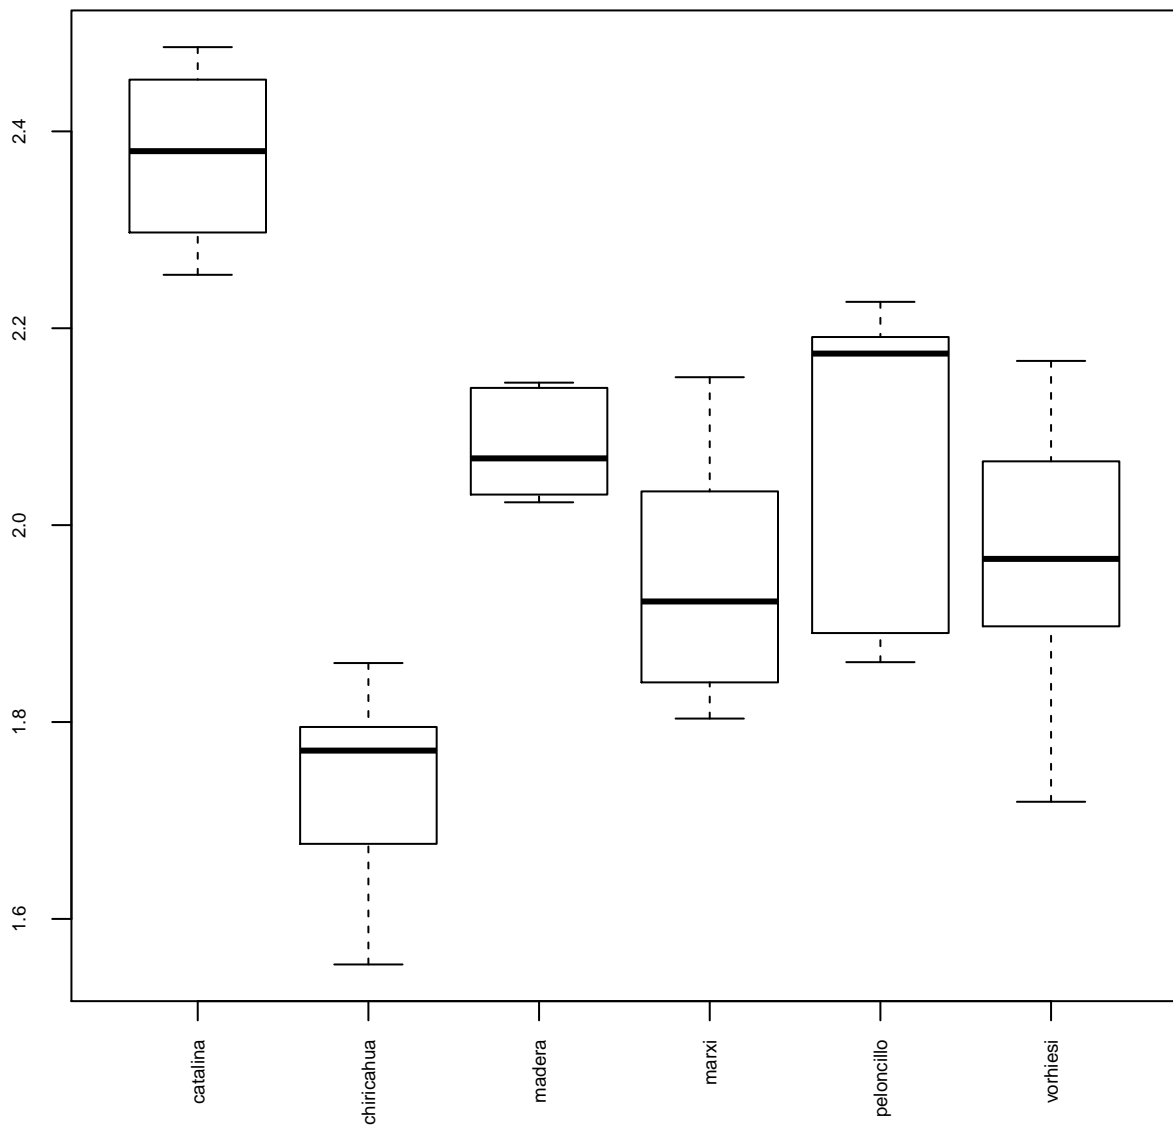

Supplement: Supplementary file 292

## Femur 4/Tarsus 4 ratio – females

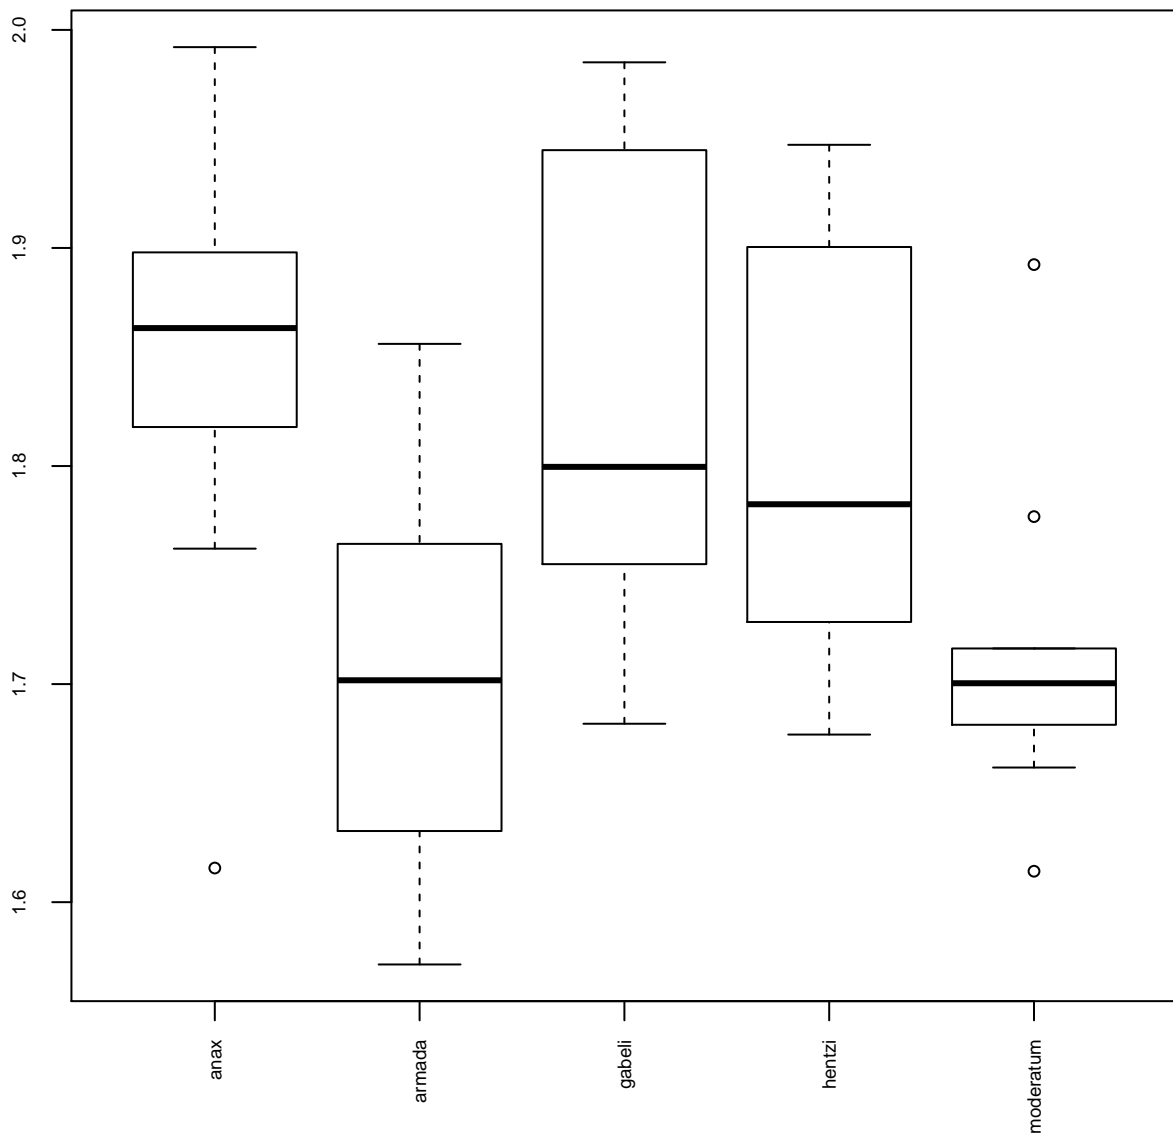

Supplement: Supplementary file 293

# Carapace Length/Tarsus 4 ratio – females

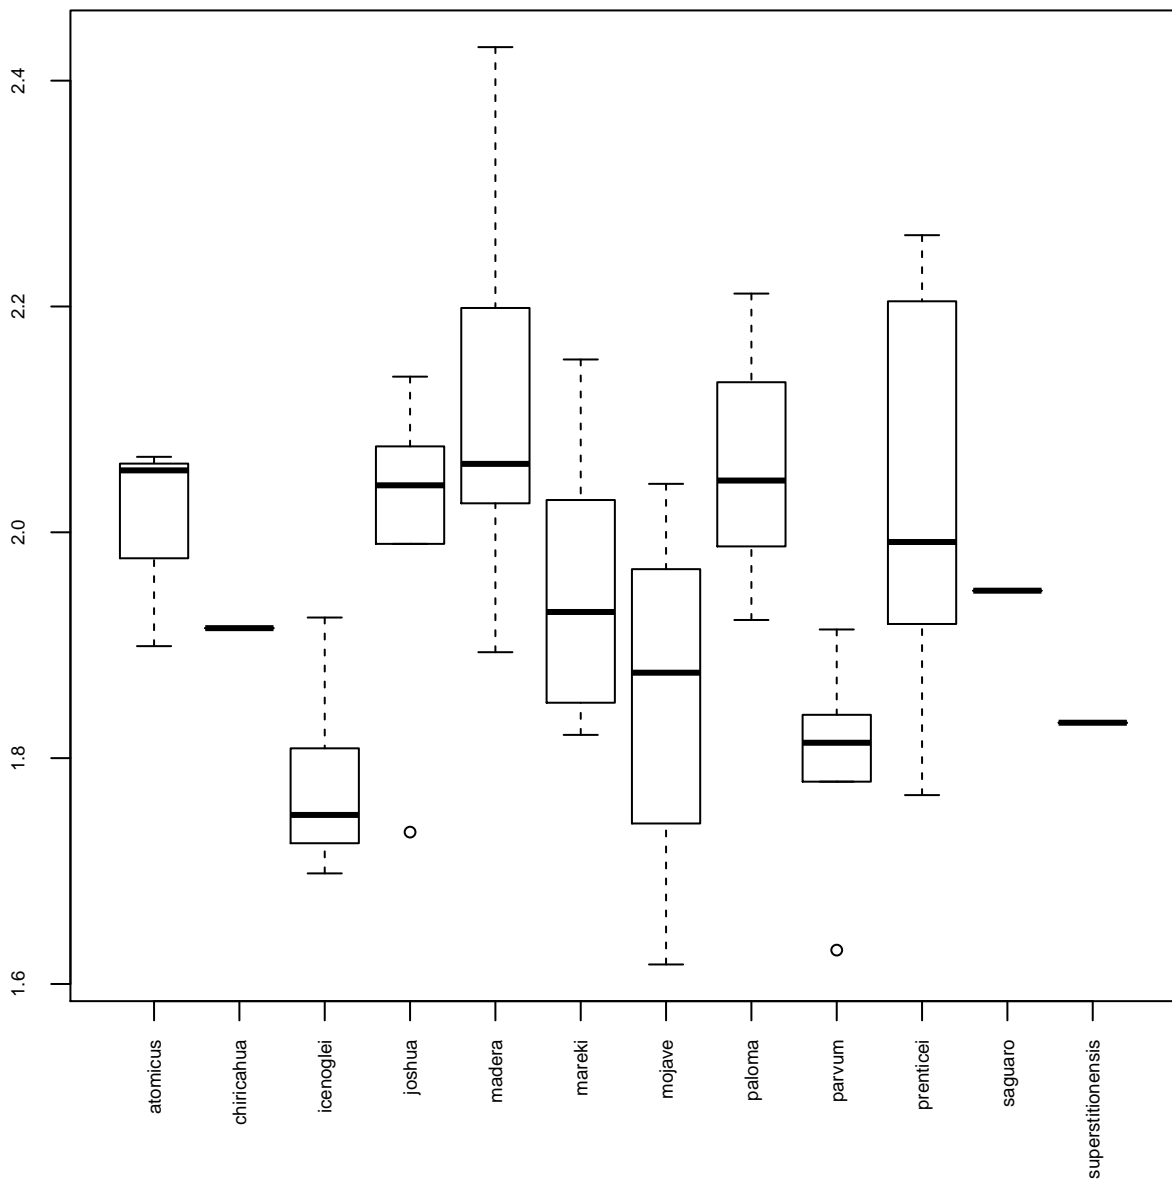

Supplement: Supplementary file 294

## Tarsus 1/Patella 4 Length ratio – females

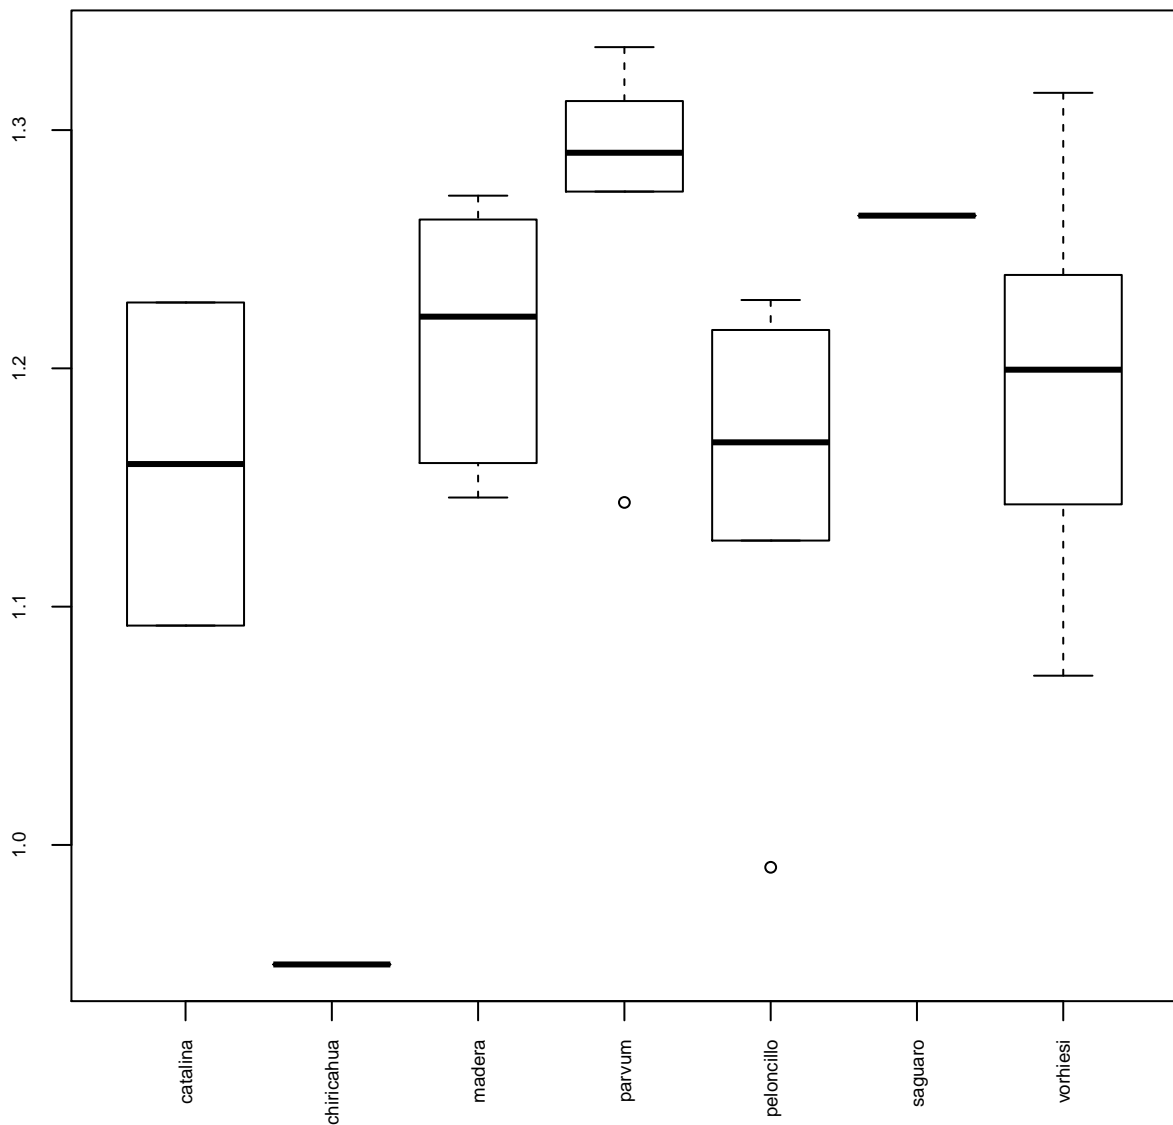

Supplement: Supplementary file 295

# Tibia 1/Patella 3 Length ratio – females

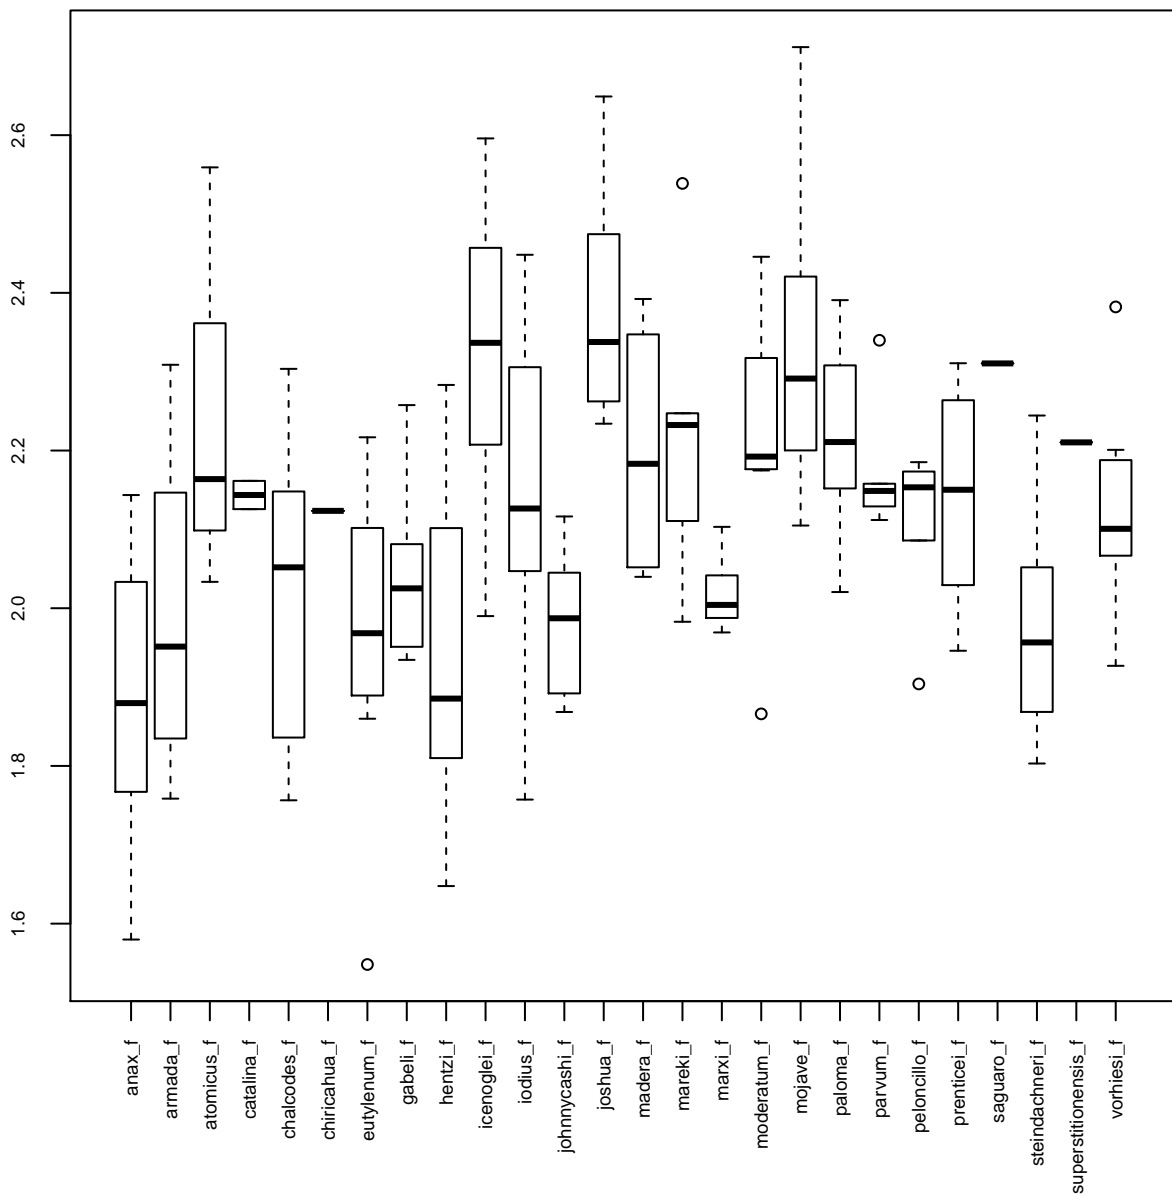

Supplement: Supplementary file 296

# Leg 1/Leg 4 Length ratio – males

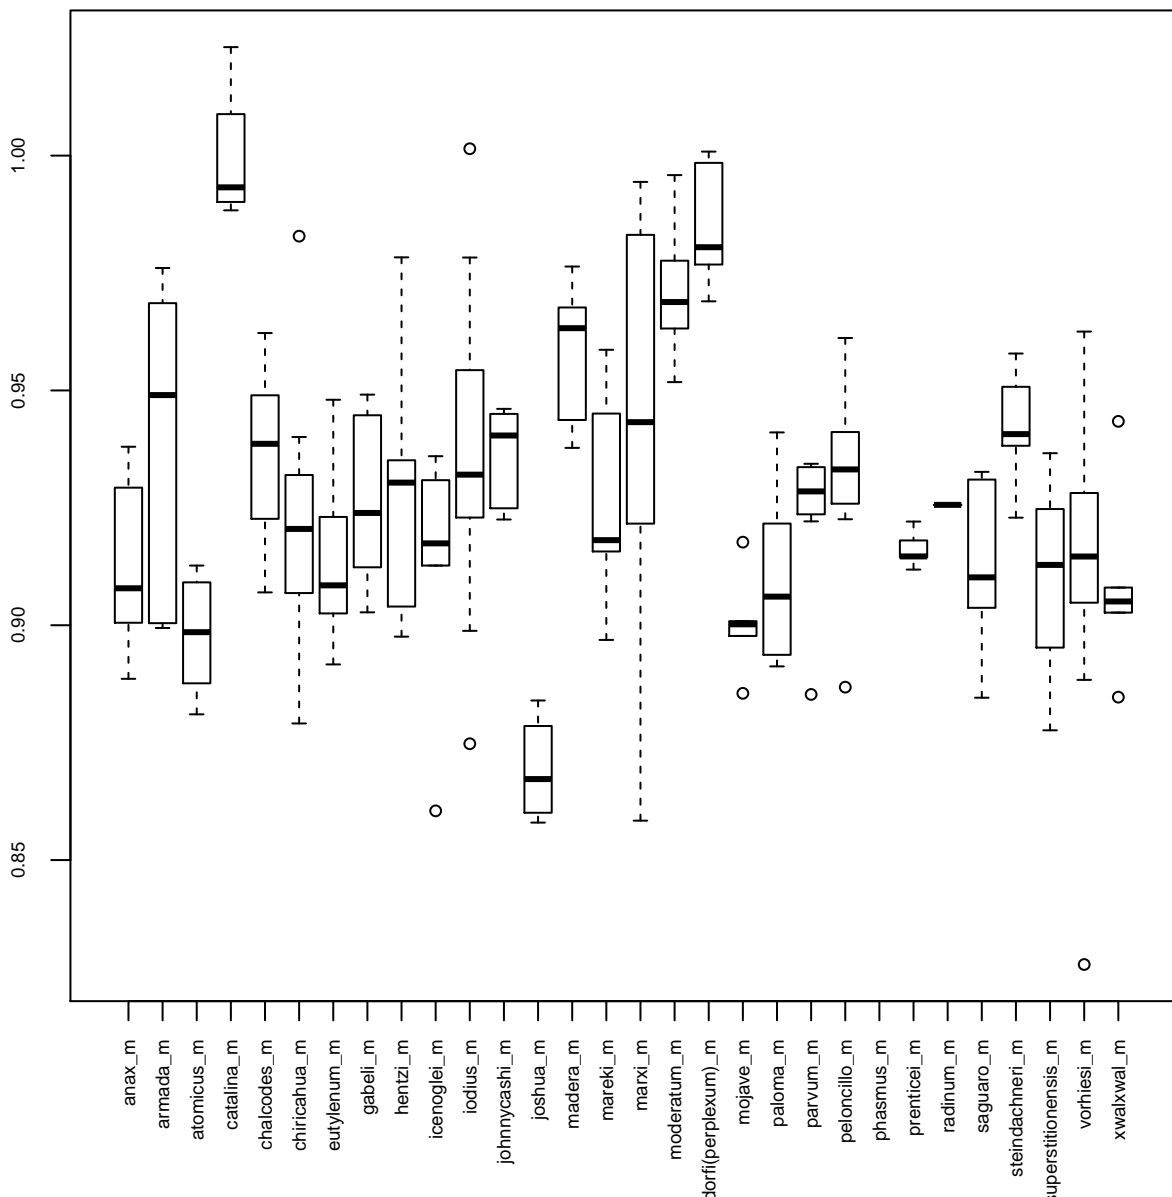

Supplement: Supplementary file 297

# Metatarsus 1/Femur 3 Length ratio – males

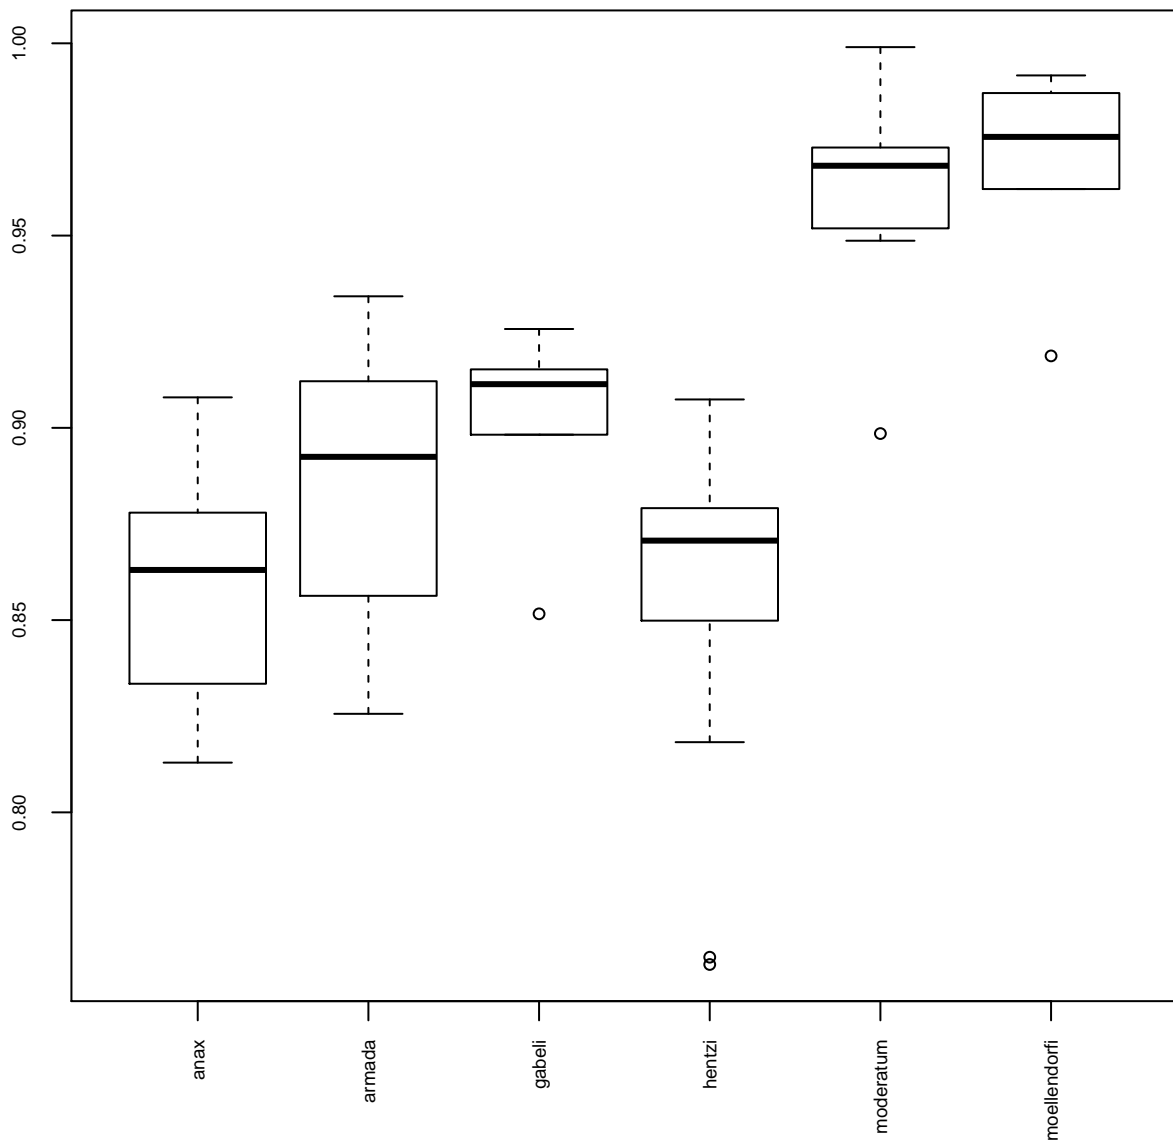

Supplement: Supplementary file 298

## Tibia 1/Tarsus 1 ratio – males

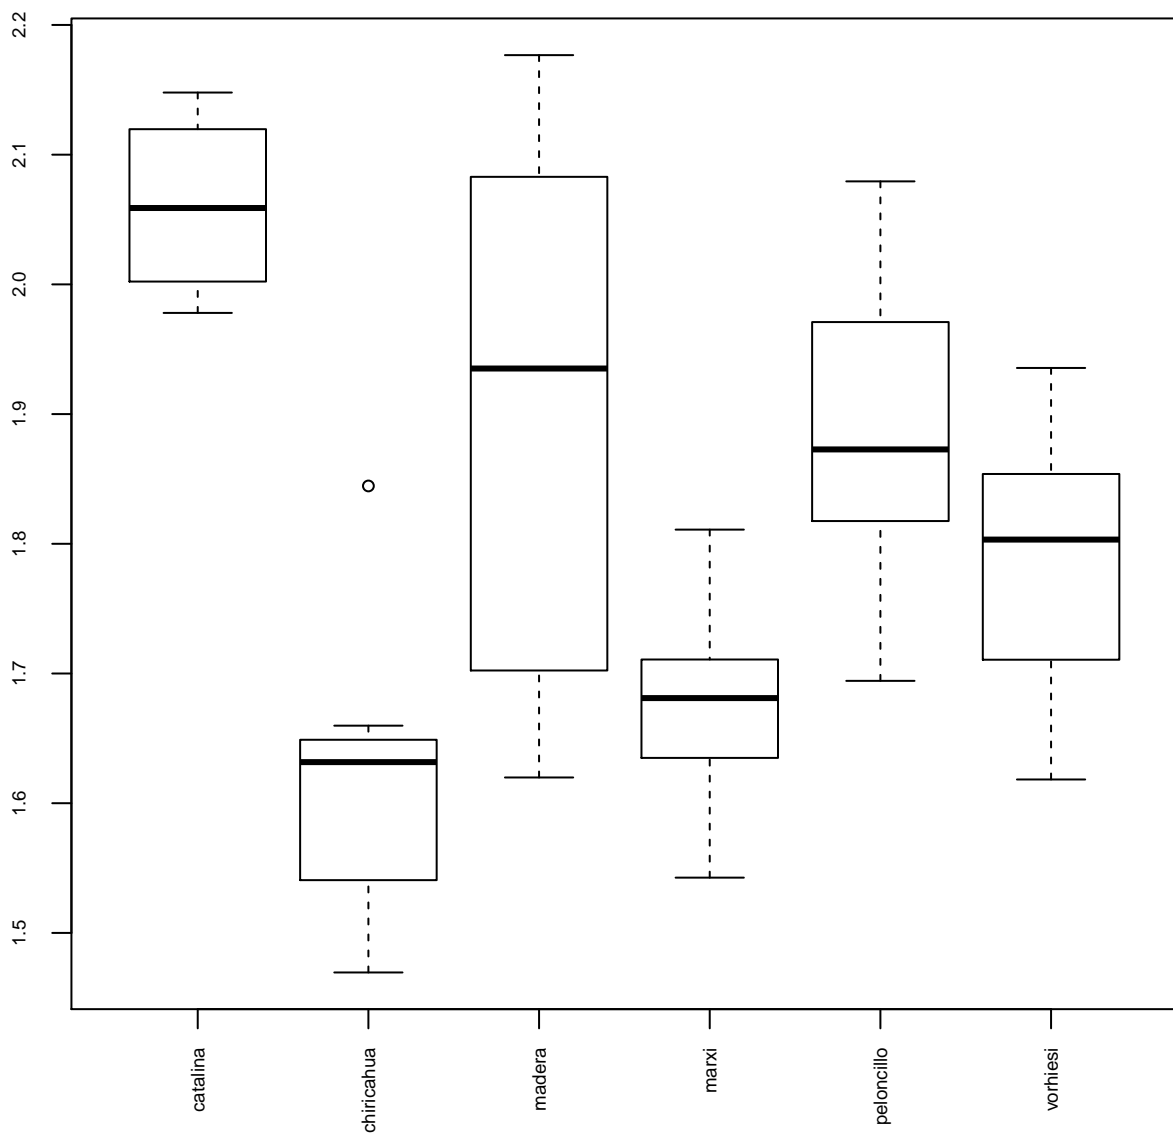

Supplement: Supplementary file 299

## Leg 1 Length – males

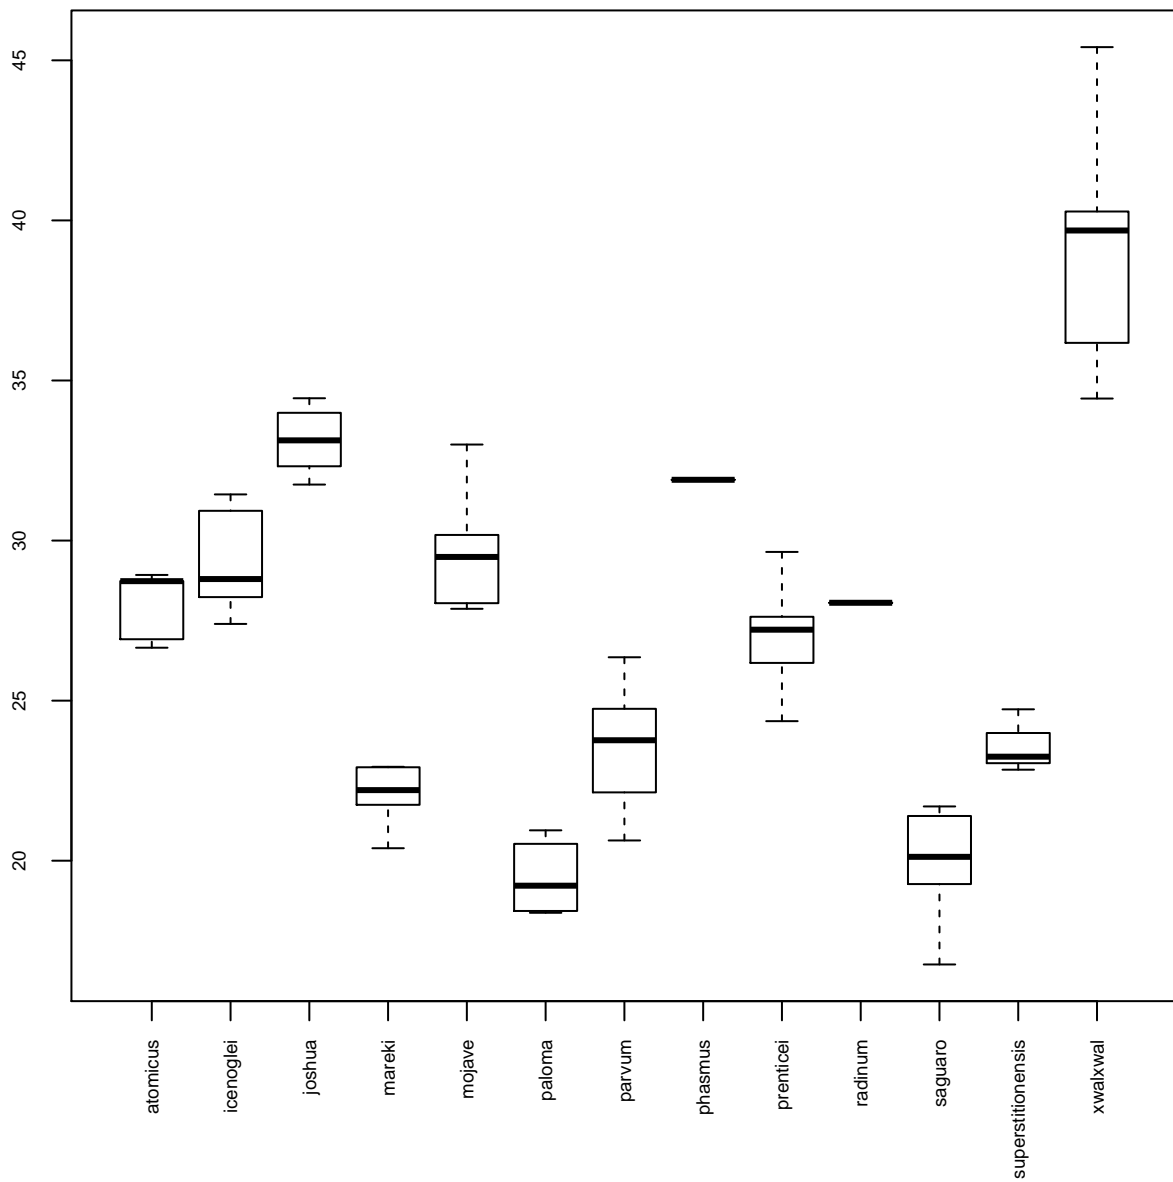

Supplement: Supplementary file 300
