# Supplementary material (part 4 of 15)
Source: publisher site journal article supplement (http://zookeys.pensoft.net/article/6264/download/suppl/32/)

## Metatarsus 1/Femur 3 Length ratio – males

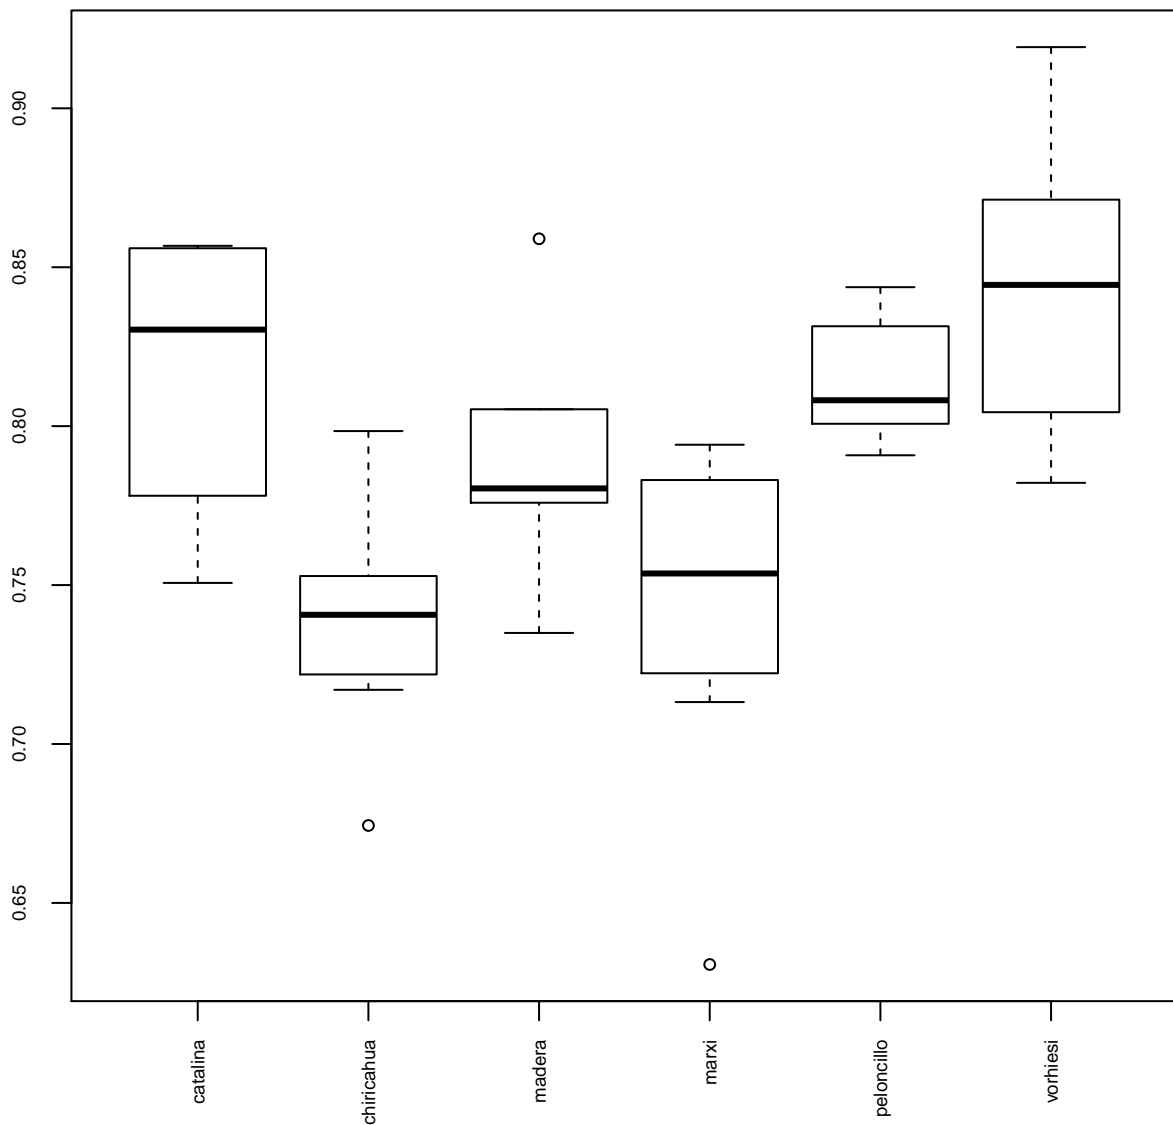

Supplement: Supplementary file 301

# Patella 1/Tarsus 3 Length ratio – females

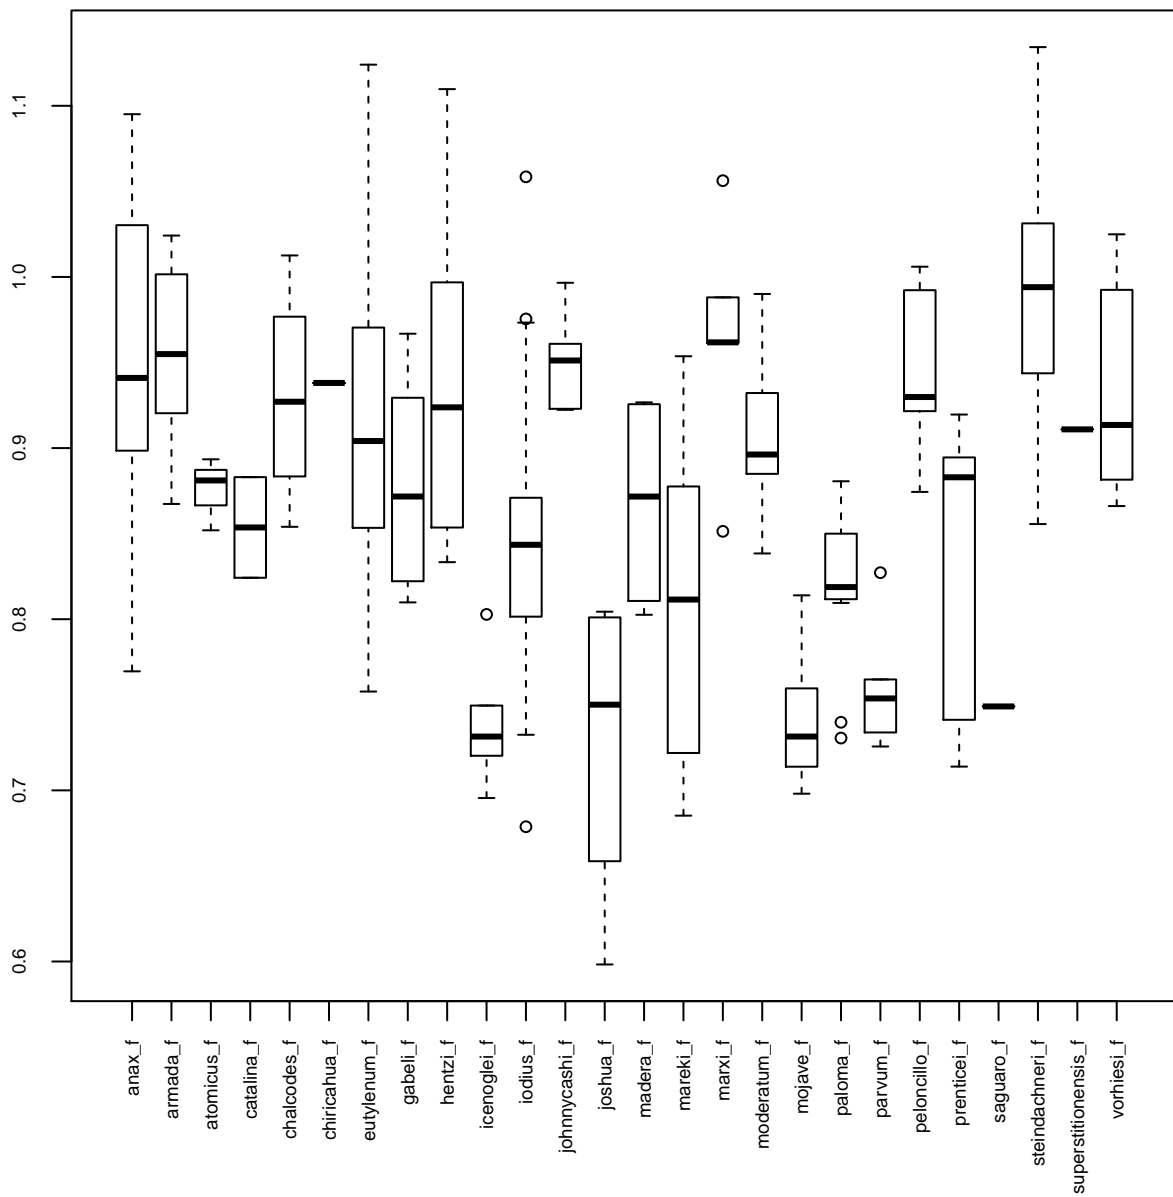

Supplement: Supplementary file 302

## Femur 3/Tibia 3 ratio – males

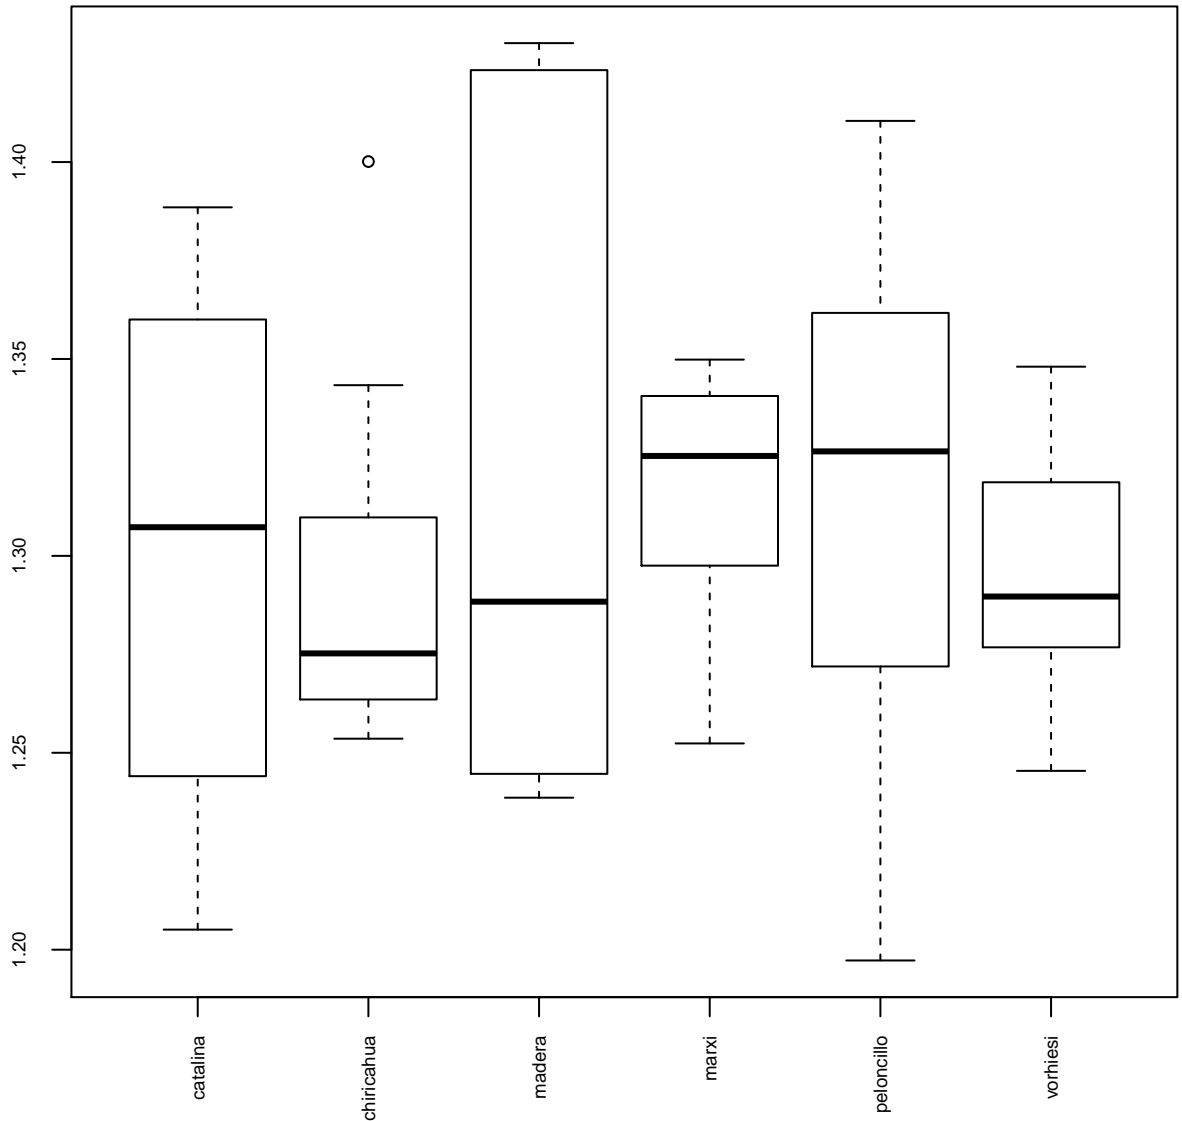

Supplement: Supplementary file 303

# Carapace Length/Metatarsus 1 ratio – males

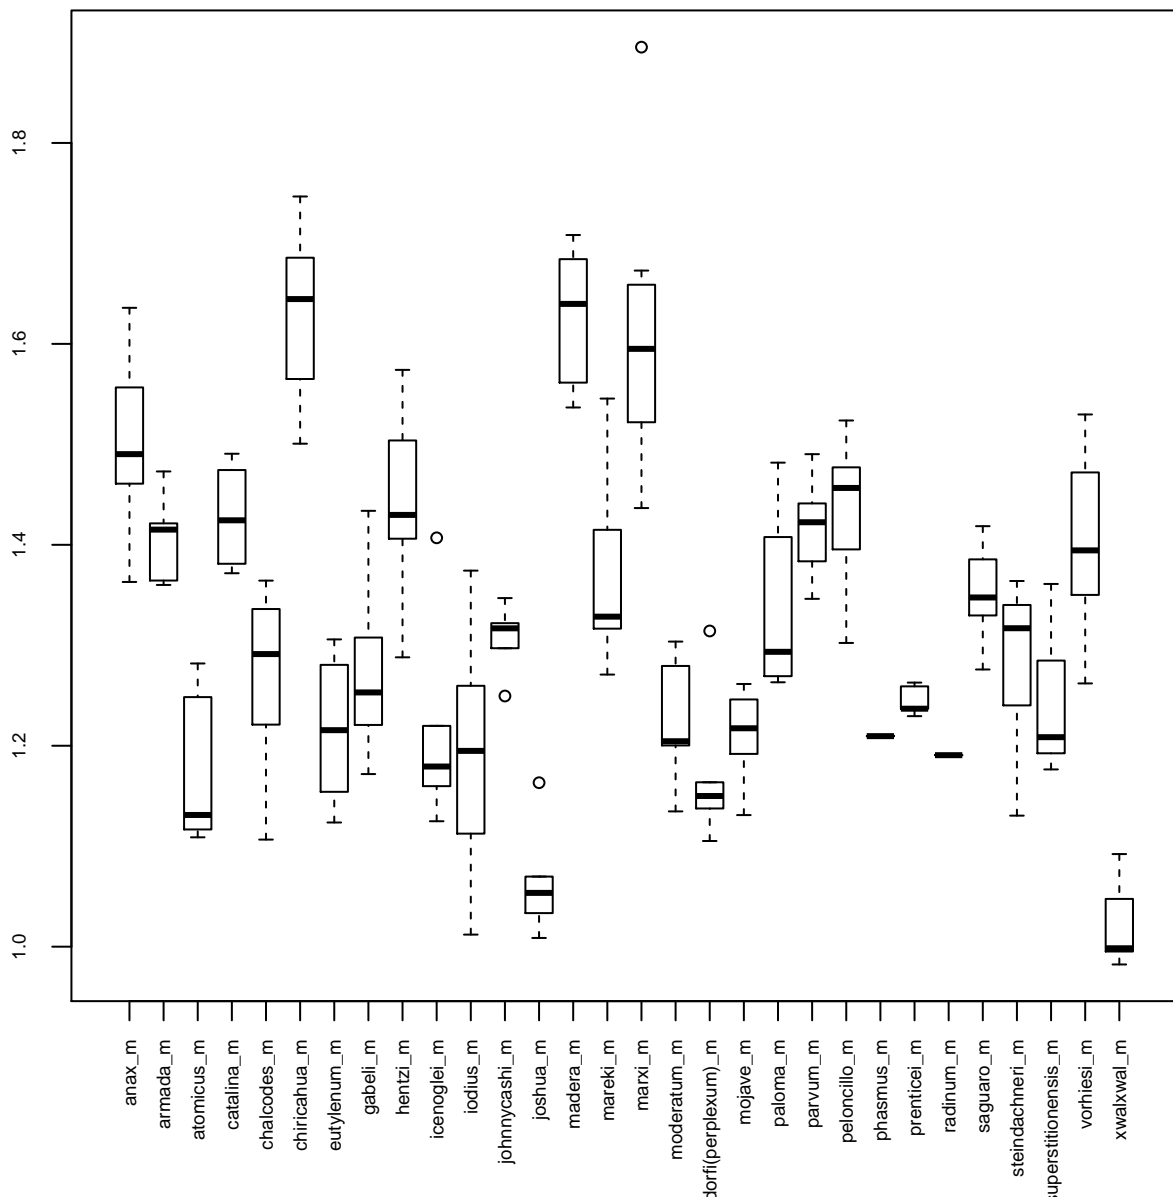

Supplement: Supplementary file 304

# Patella 1/Metatarsus 3 Length ratio – males

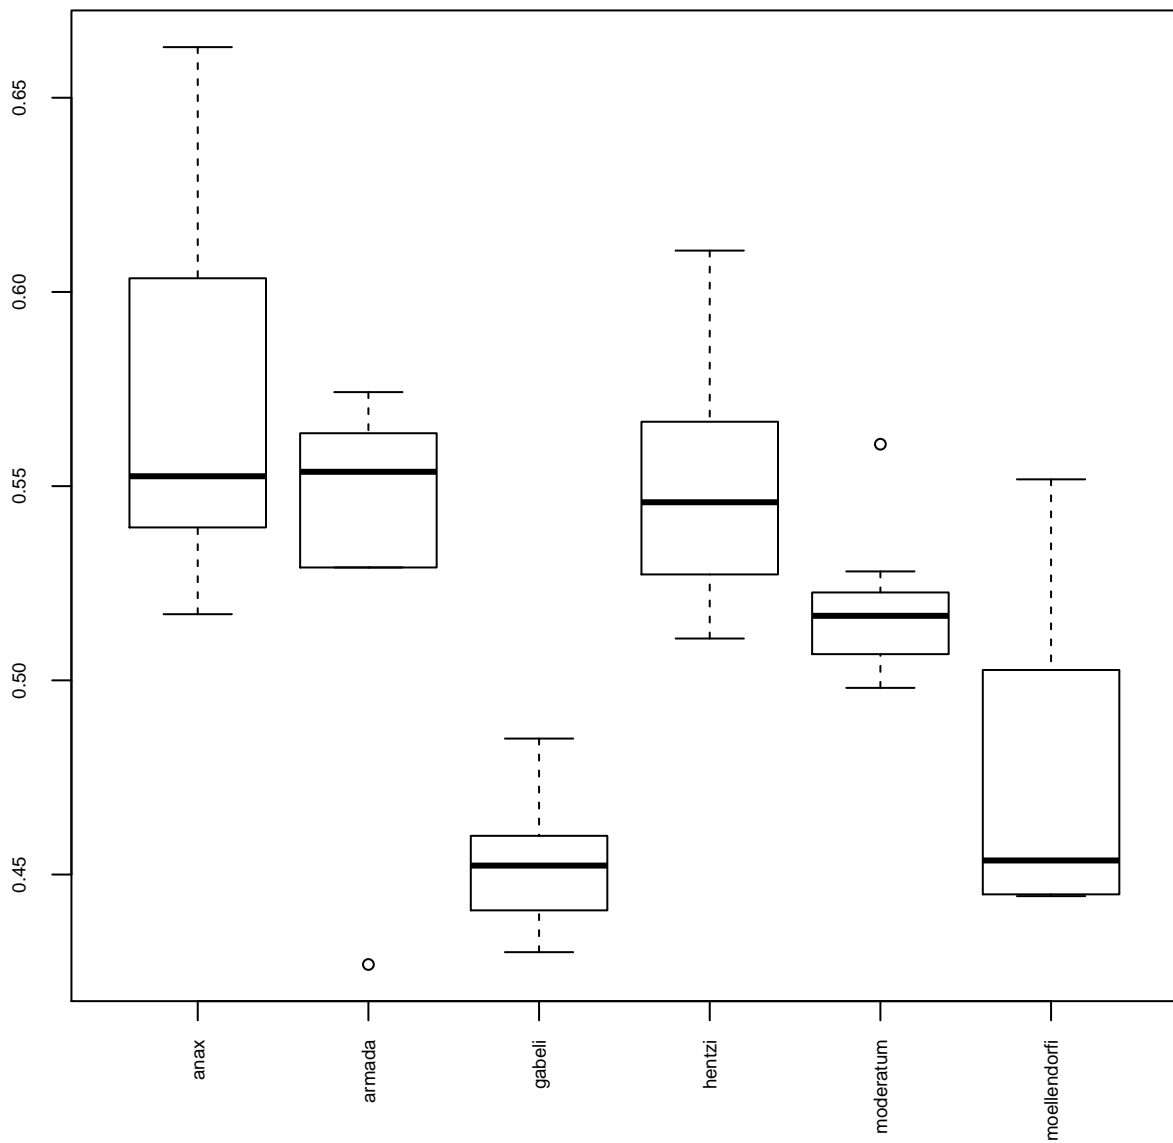

Supplement: Supplementary file 305

## Leg 3 Scopulation ratio – males

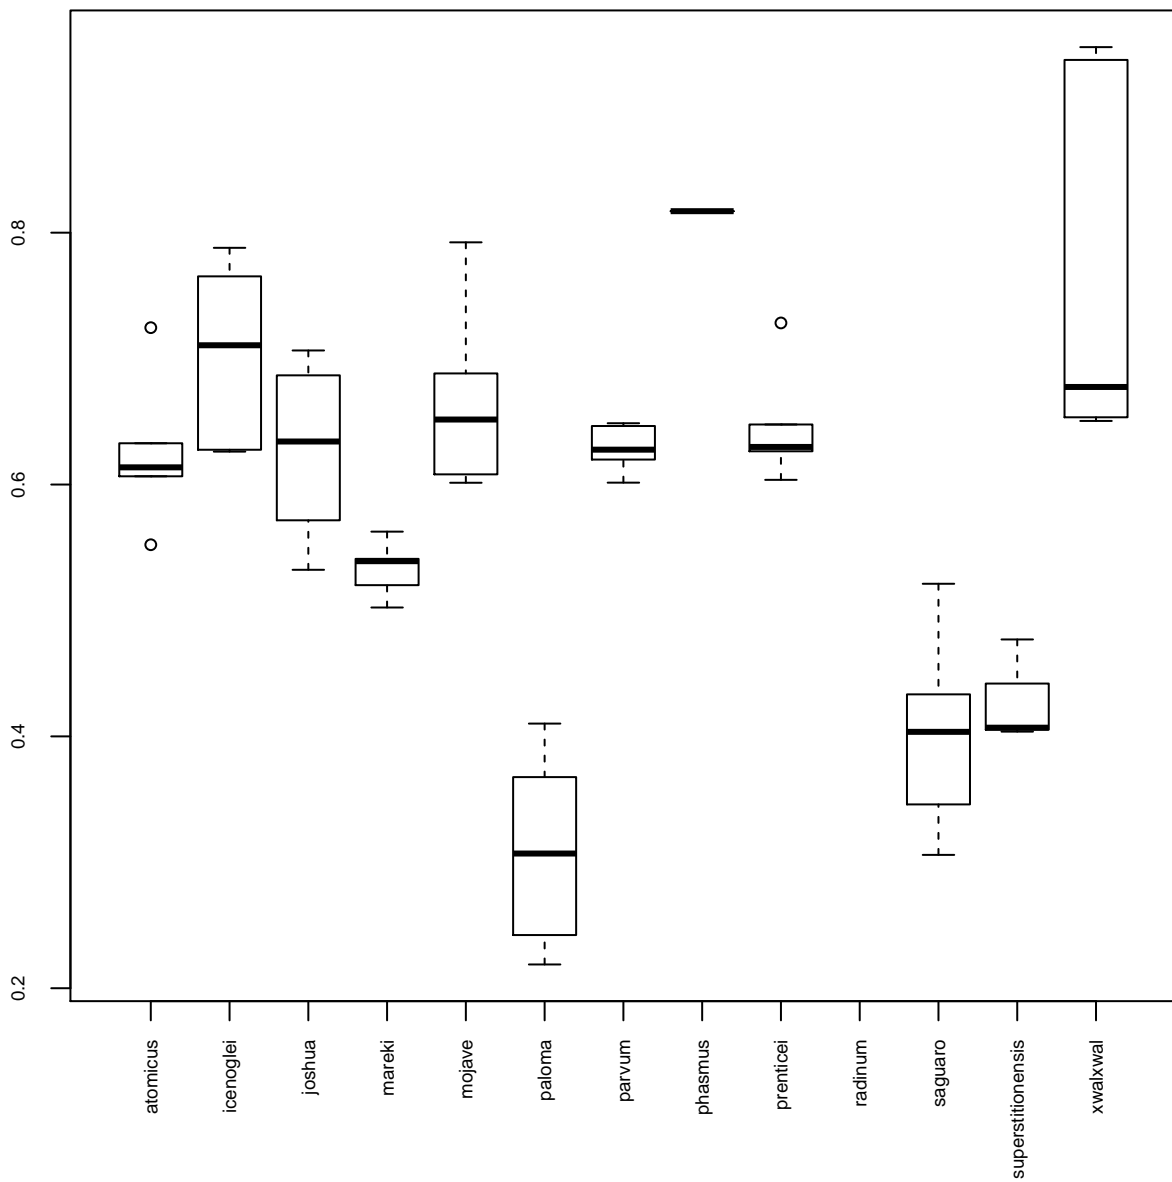

Supplement: Supplementary file 306

## Leg 1/Leg 3 Length ratio – females

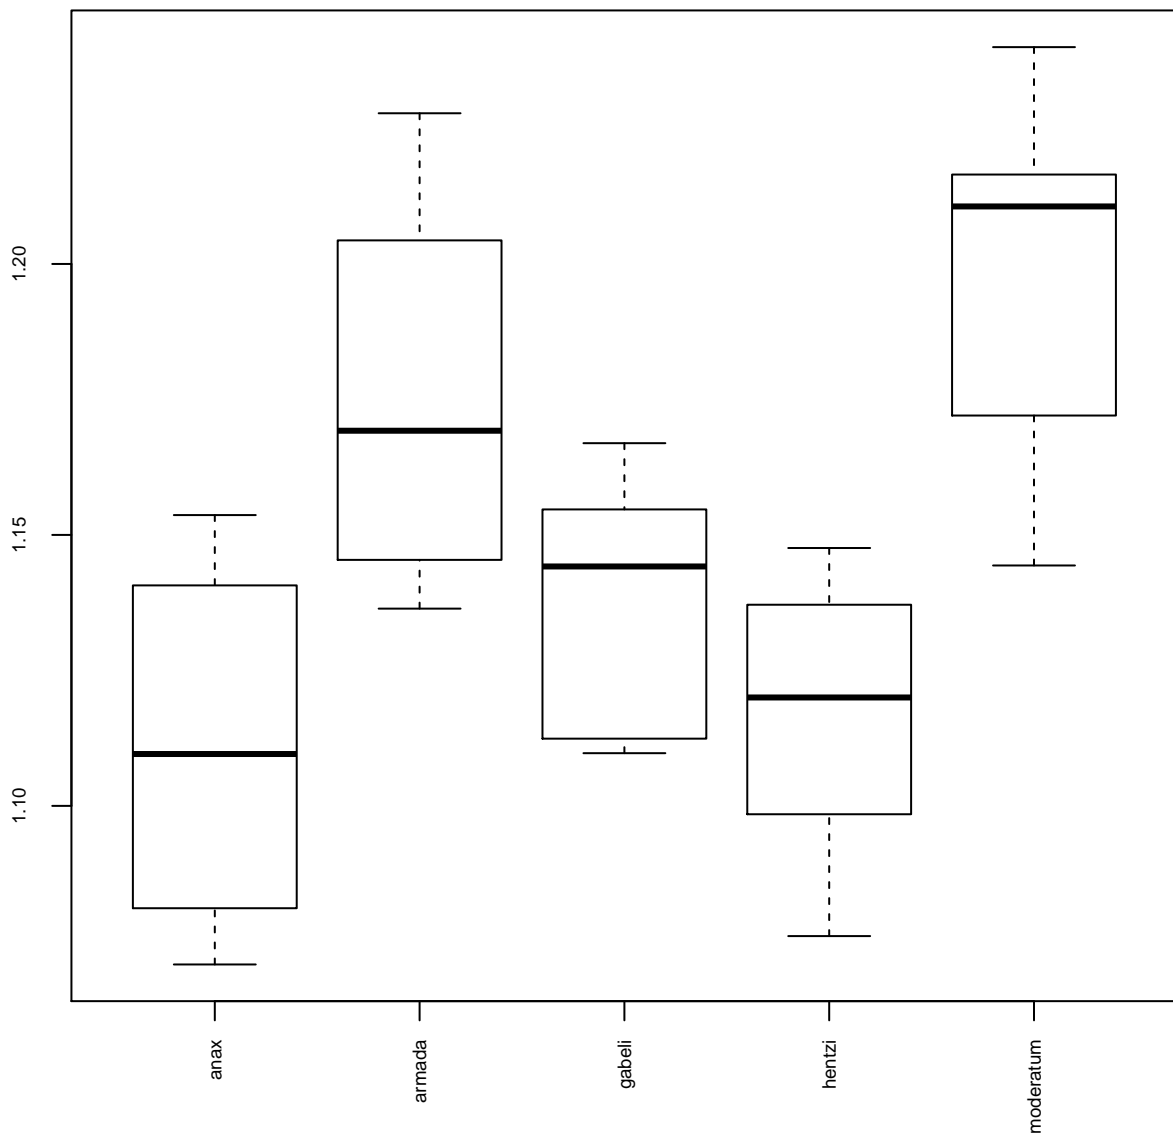

Supplement: Supplementary file 307

# Tibia 3/Patella 4 Length ratio – females

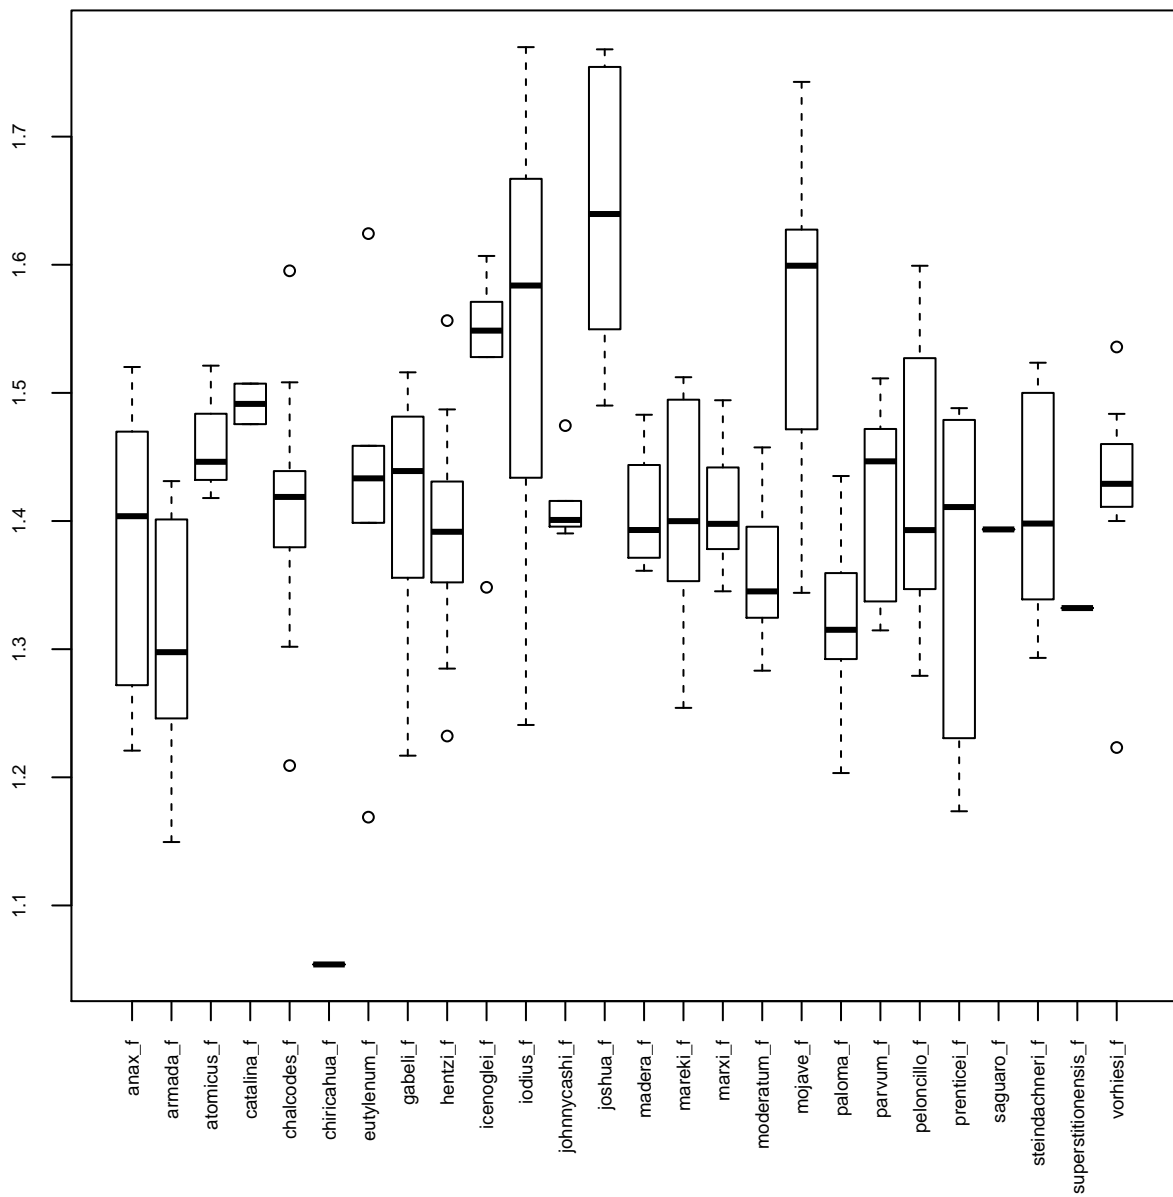

Supplement: Supplementary file 308

## Femur 1/Tarsus 4 ratio – males

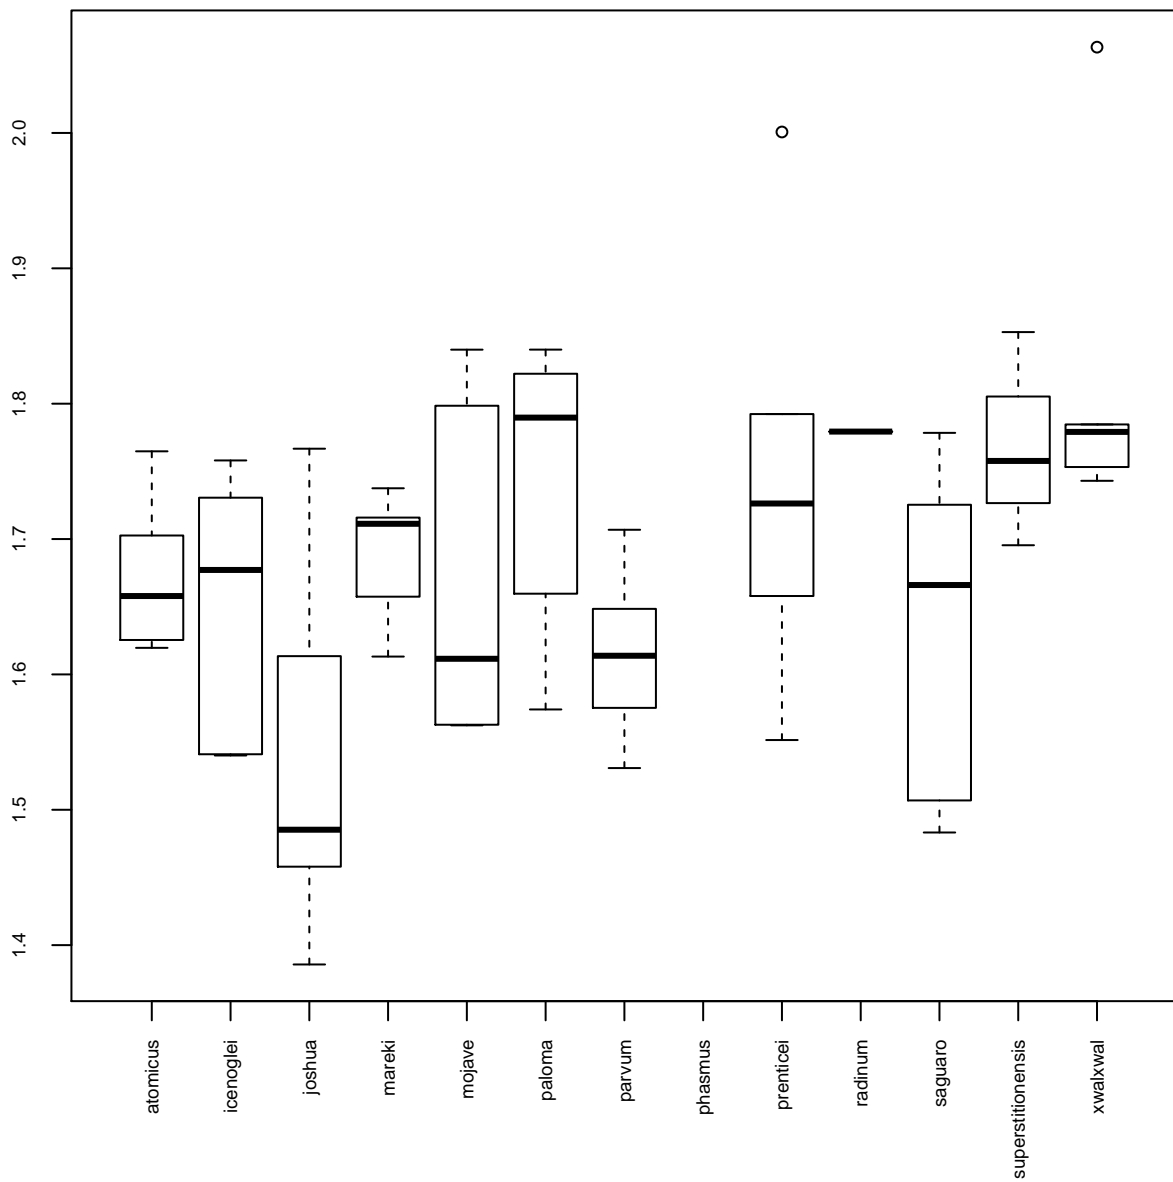

Supplement: Supplementary file 309

## Metatarsus 1/Tarsus 3 Length ratio – females

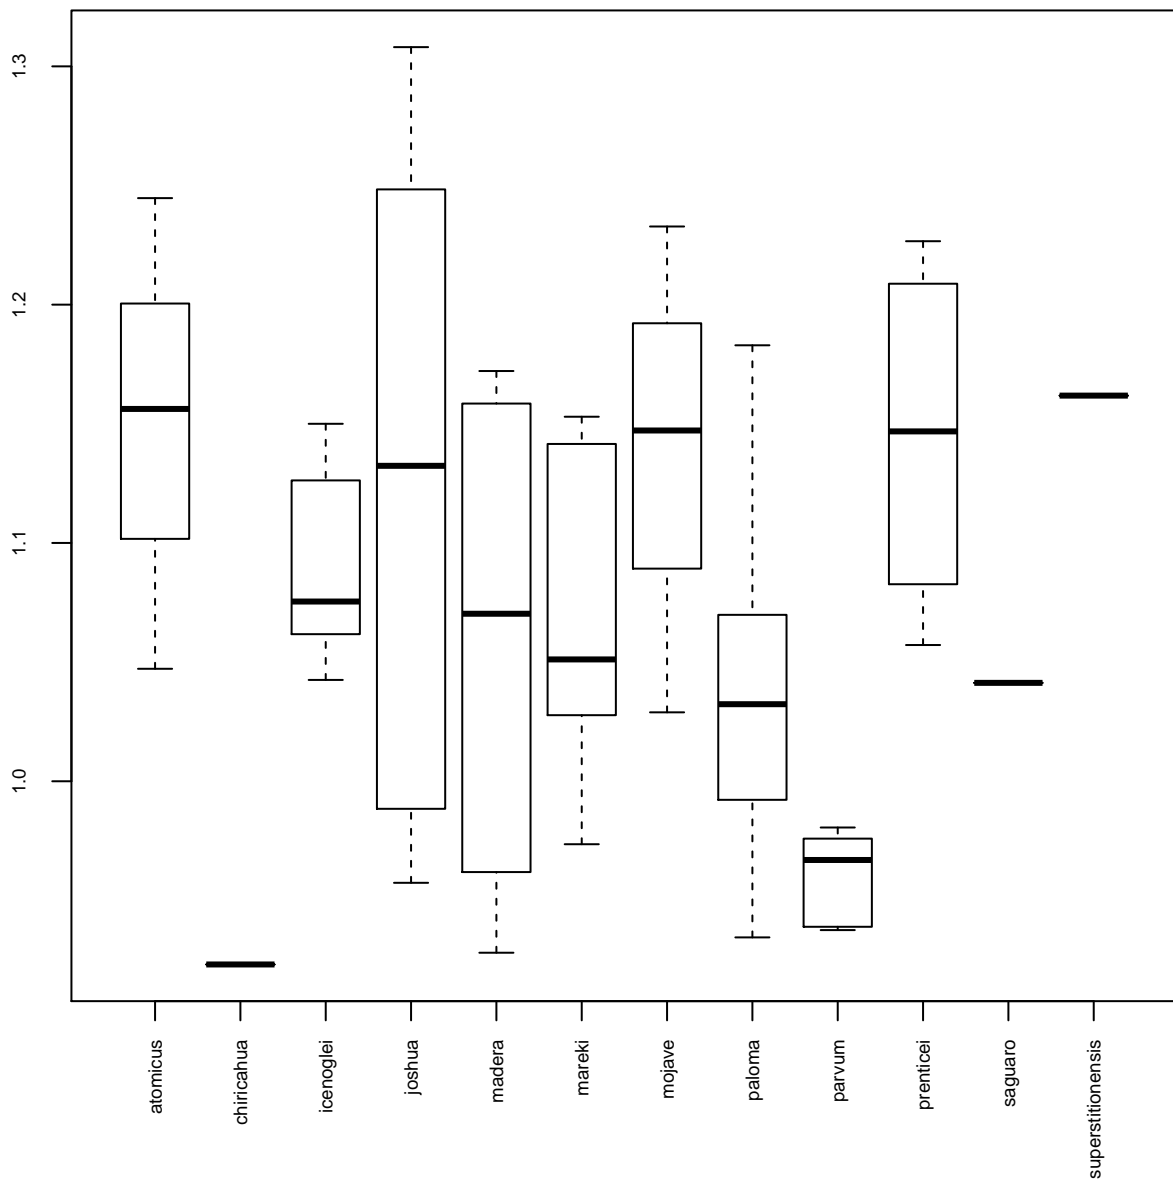

Supplement: Supplementary file 310

## Carapace Length/Tarsus 3 ratio – females

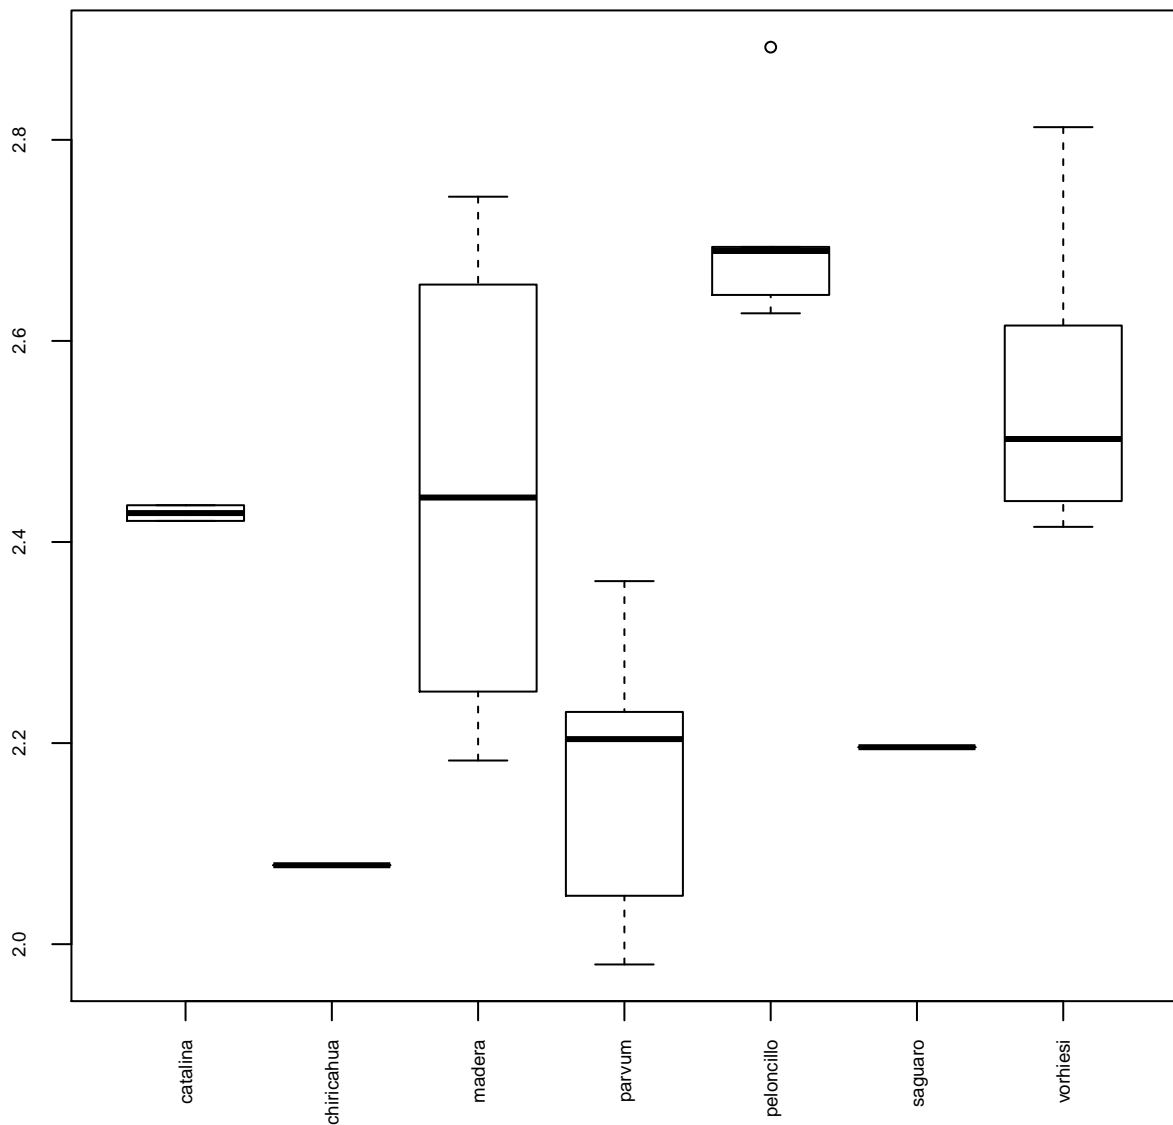

Supplement: Supplementary file 311

## Carapace Length/Tarsus 3 ratio – males

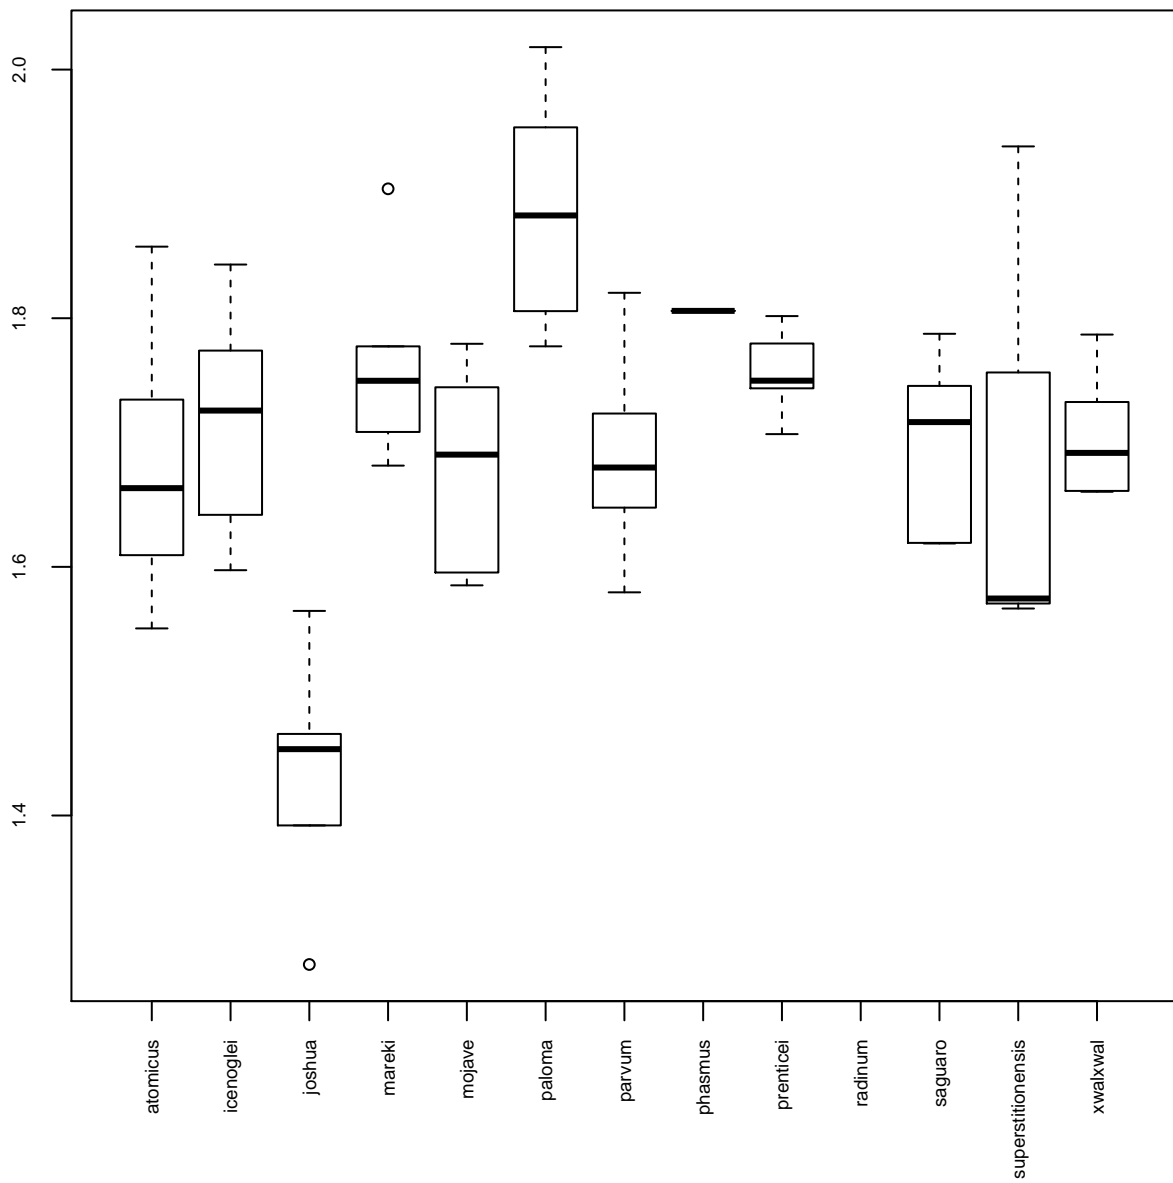

Supplement: Supplementary file 312

## Femur 3/Tarsus 4 Length ratio – males

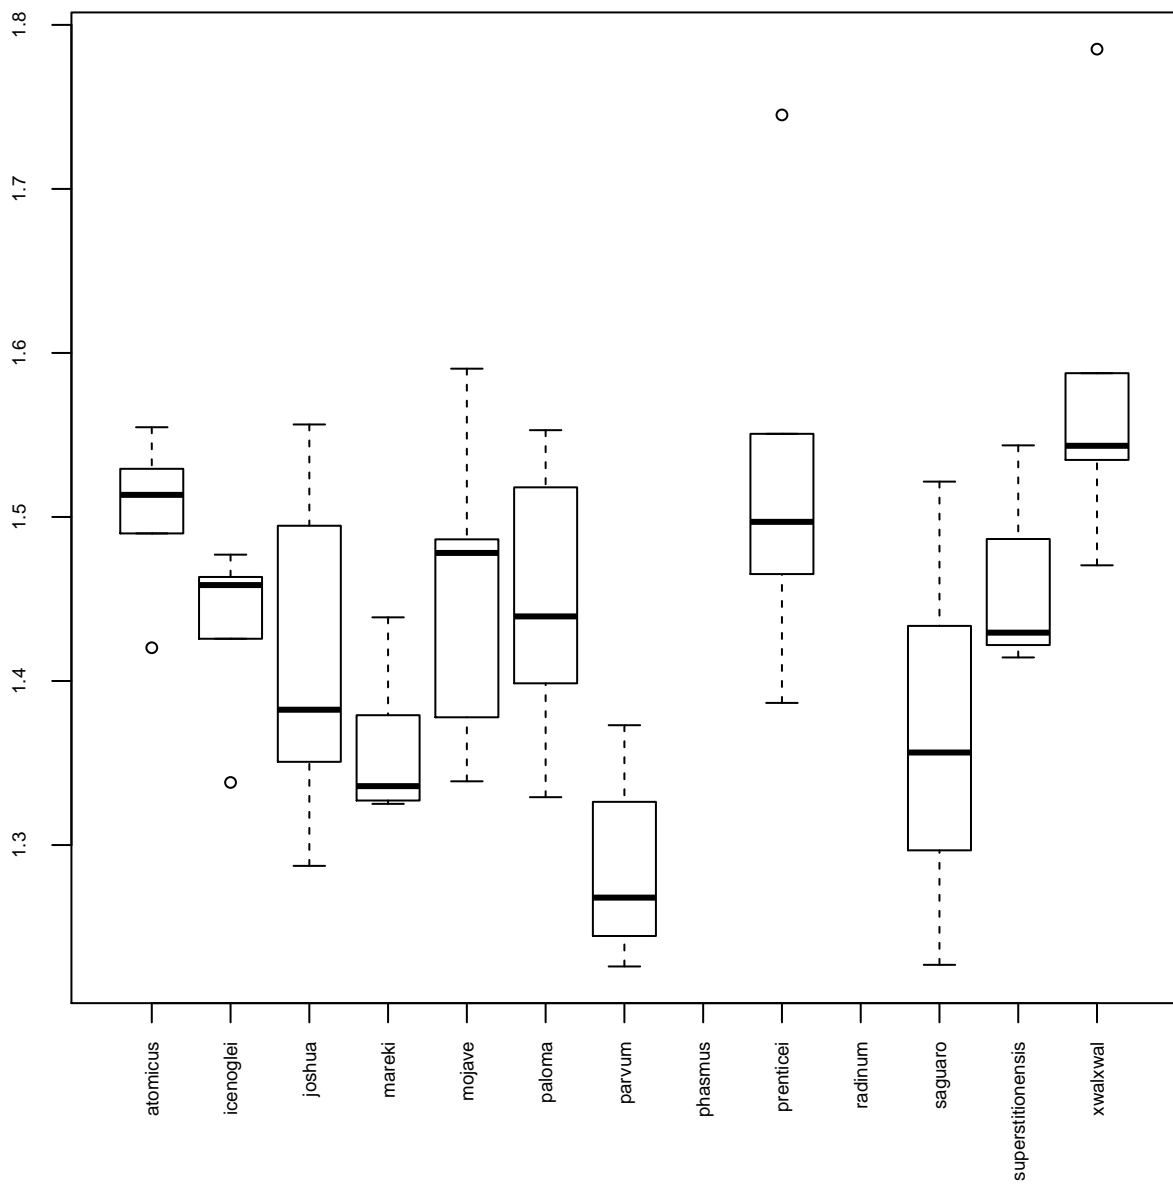

Supplement: Supplementary file 313

## Tarsus 1/Femur 4 Length ratio – males

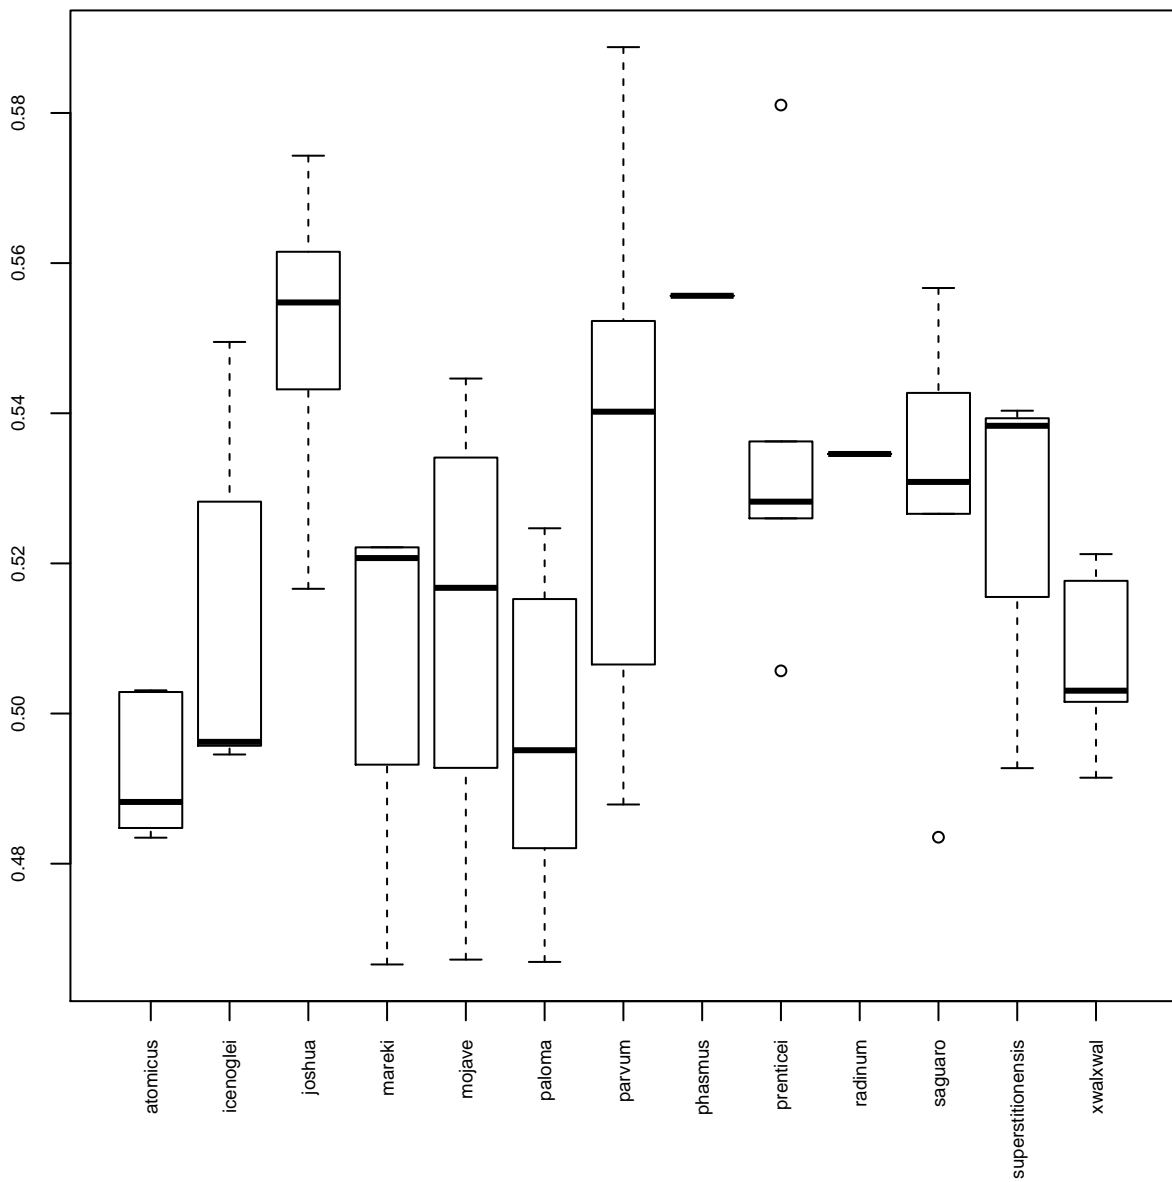

Supplement: Supplementary file 314

## Patella 1/Tarsus 3 Length ratio – females

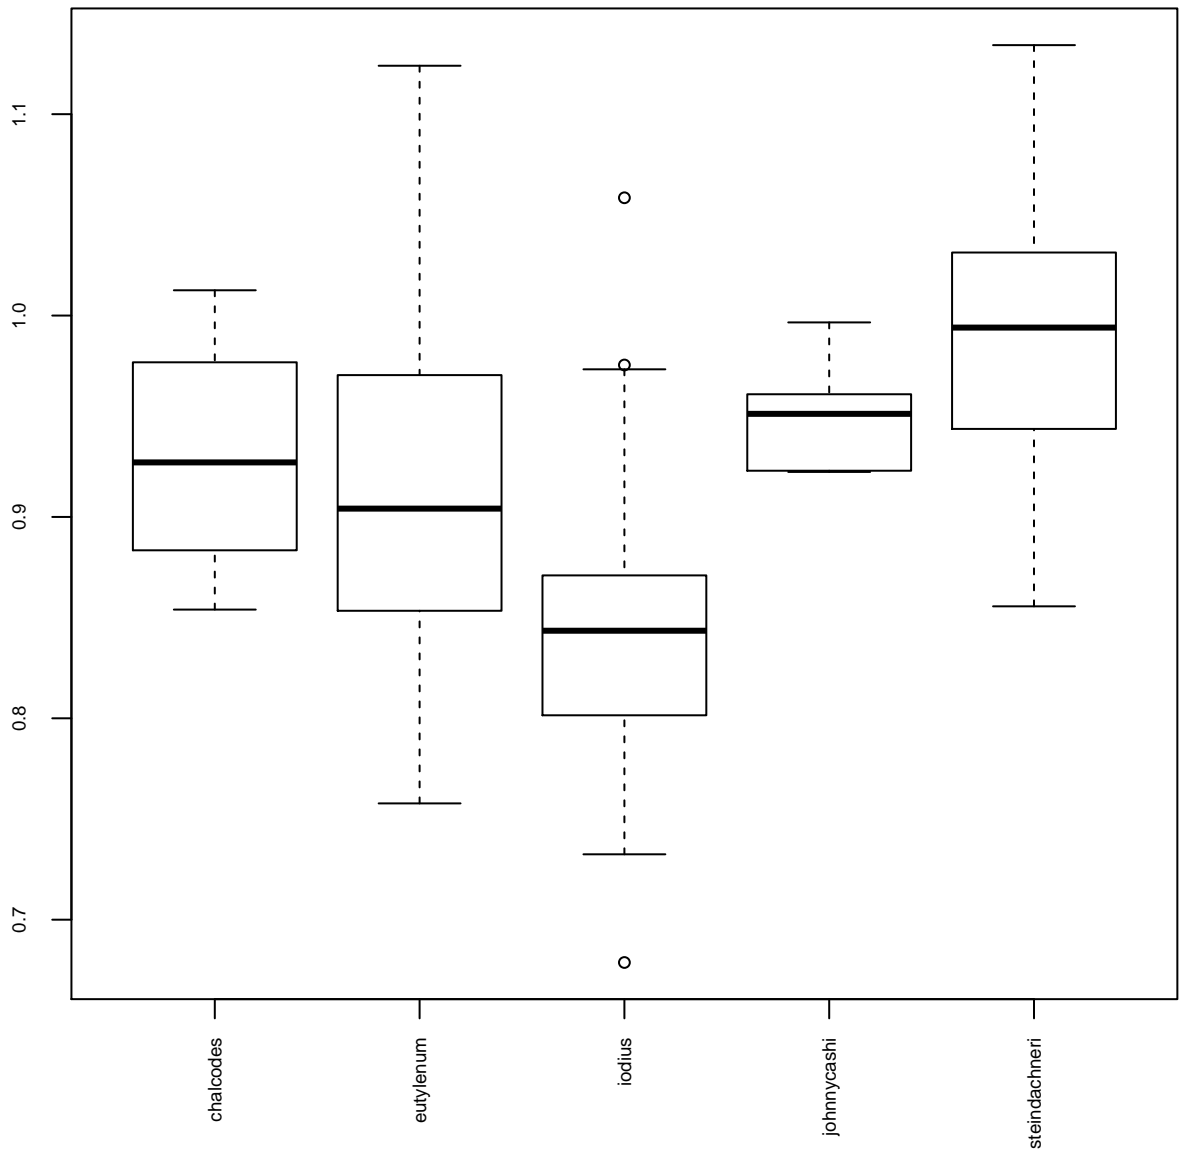

Supplement: Supplementary file 315

## Patella 3/Metatarsus 4 Length ratio – males

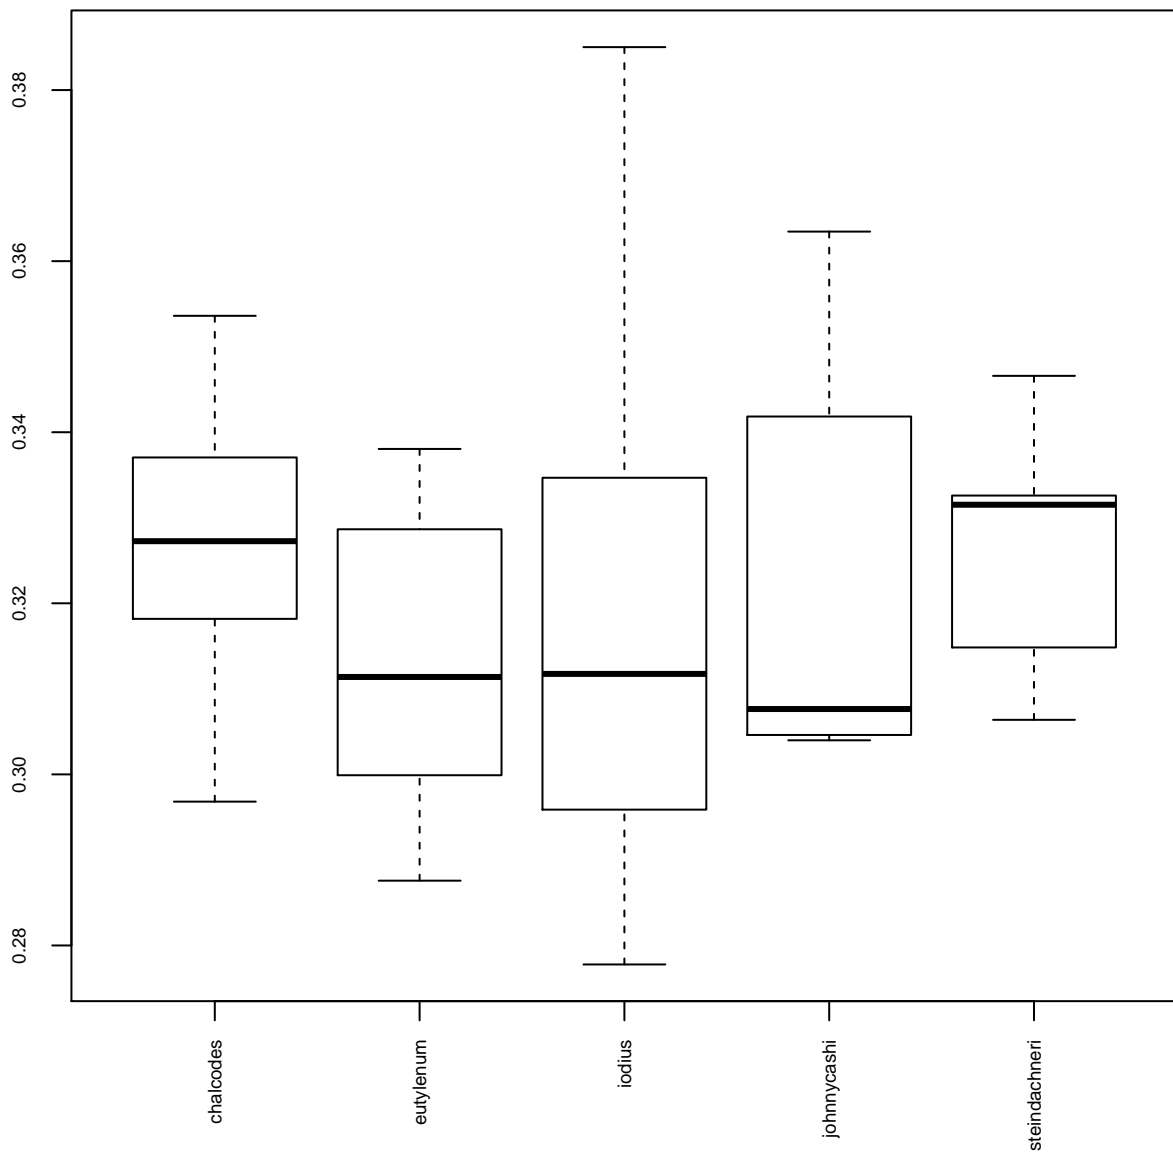

Supplement: Supplementary file 316

## Tarsus 1/Metatarsus 4 Length ratio – females

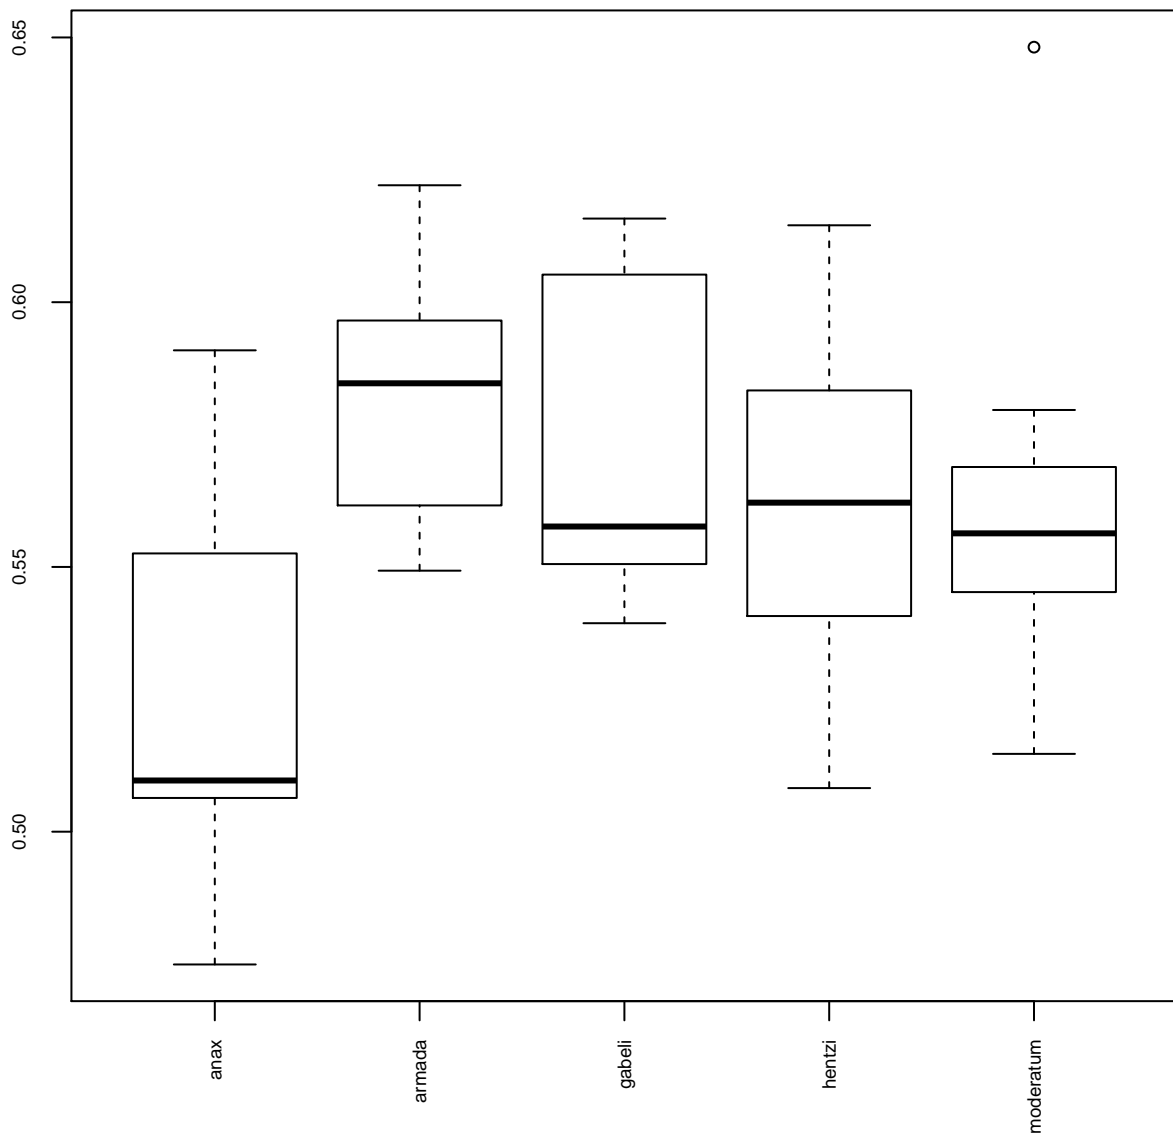

Supplement: Supplementary file 317

## Patella 1/Femur 4 Length ratio – females

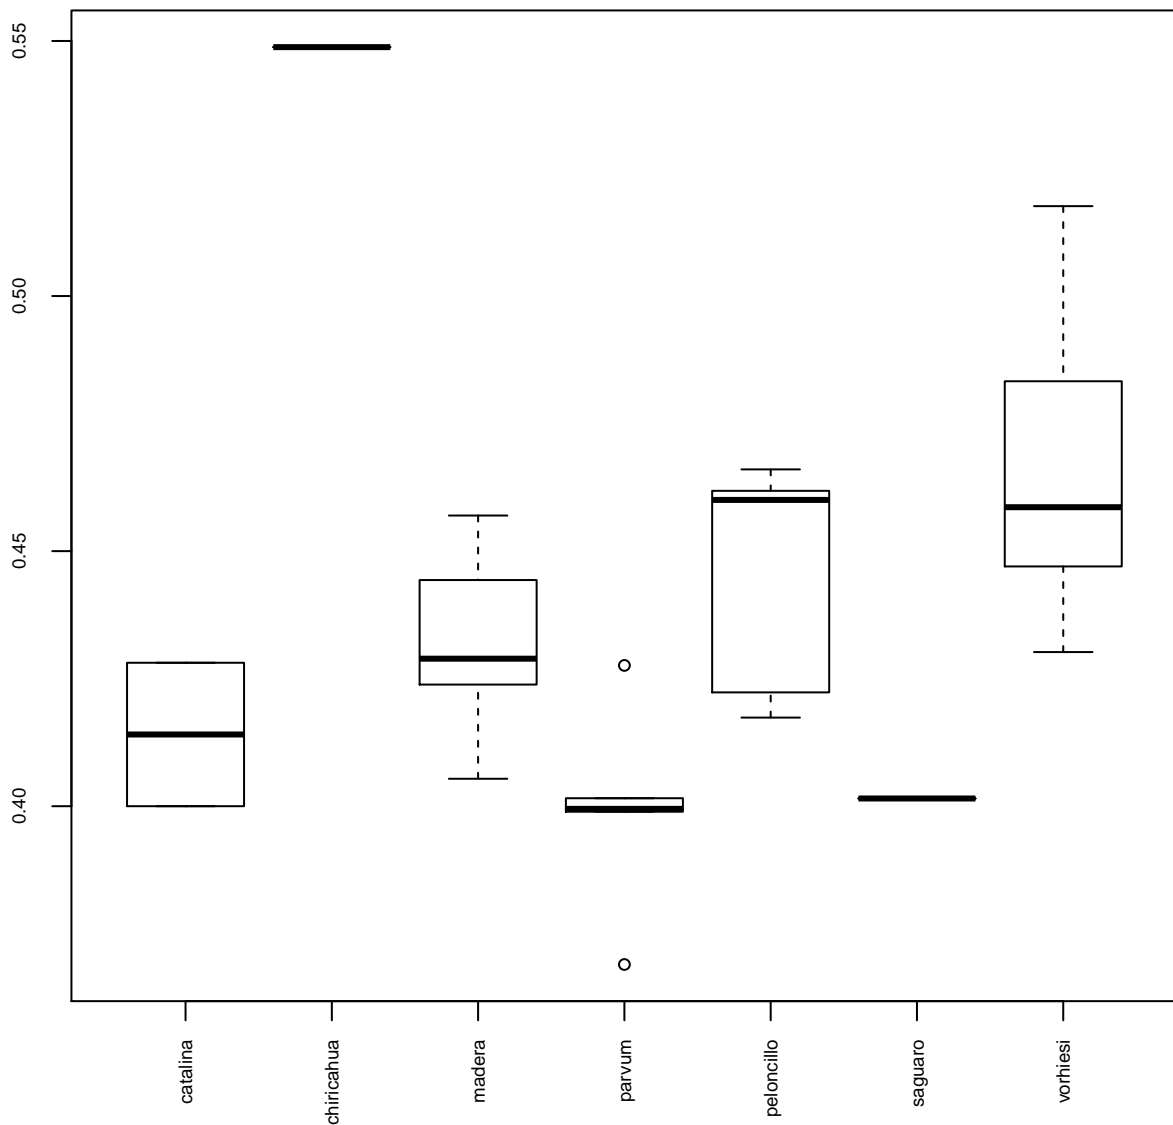

Supplement: Supplementary file 318

## Femur 3/Patella 3 ratio – females

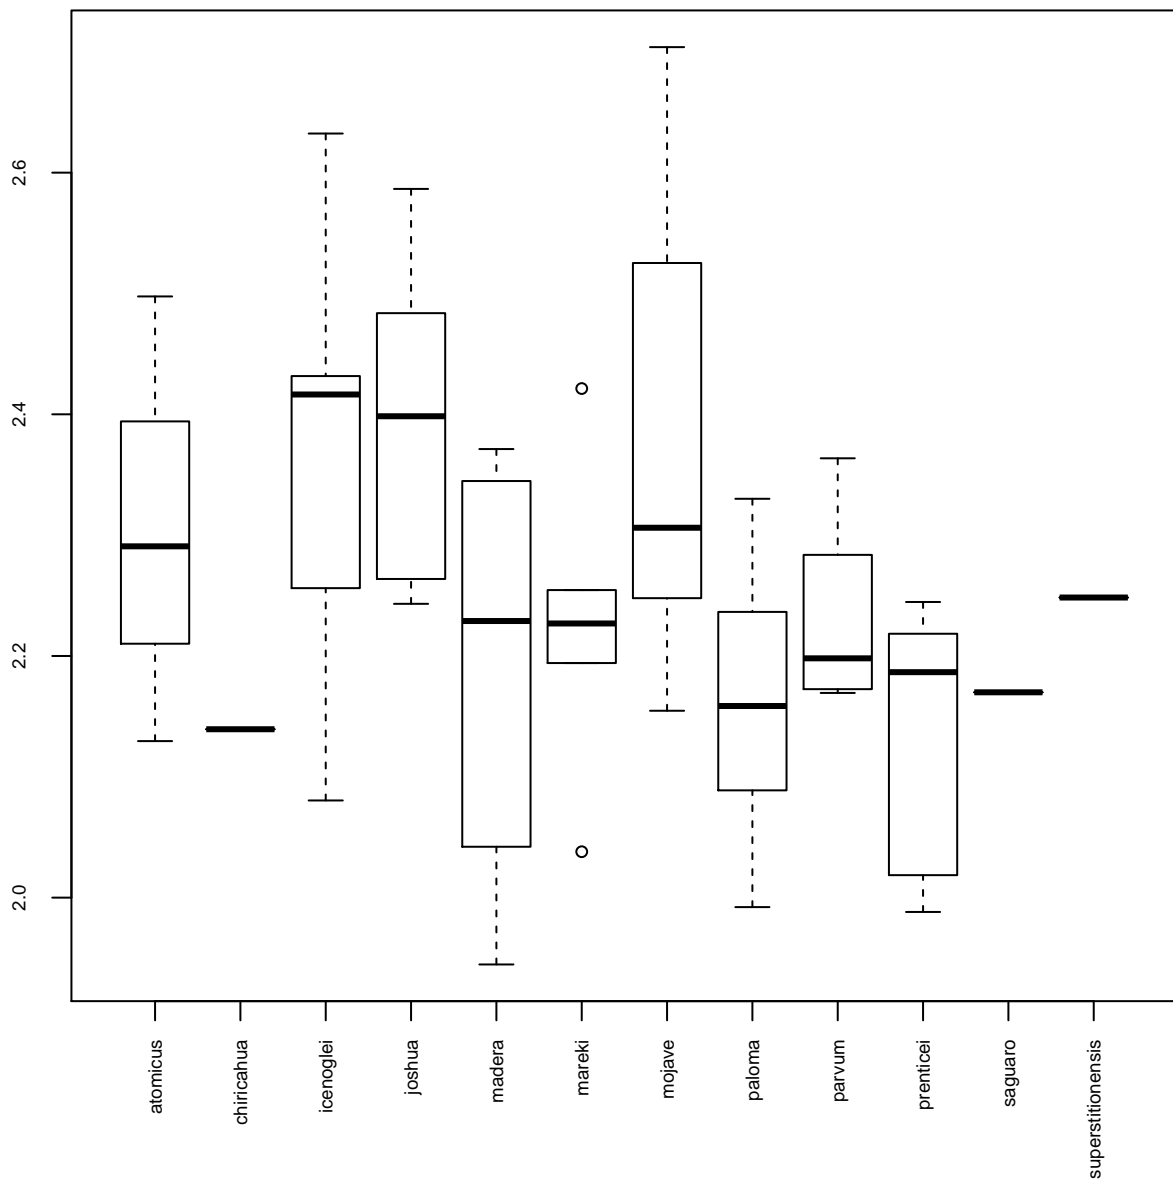

Supplement: Supplementary file 319

## Carapace Length/Metatarsus 1 ratio – males

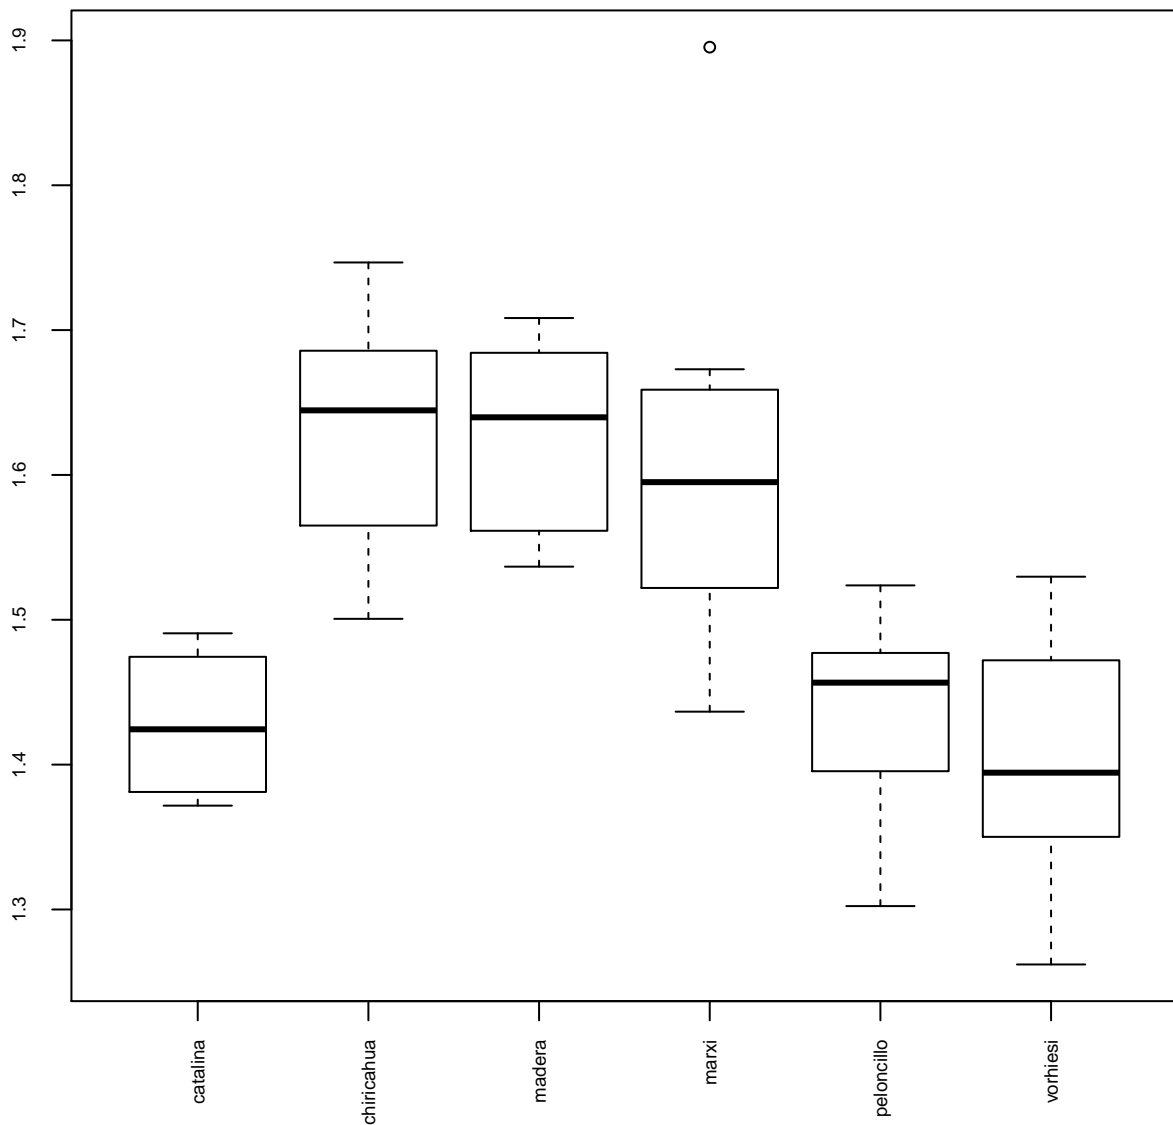

Supplement: Supplementary file 320

## Leg 1 Length/Carapace Length ratio – females

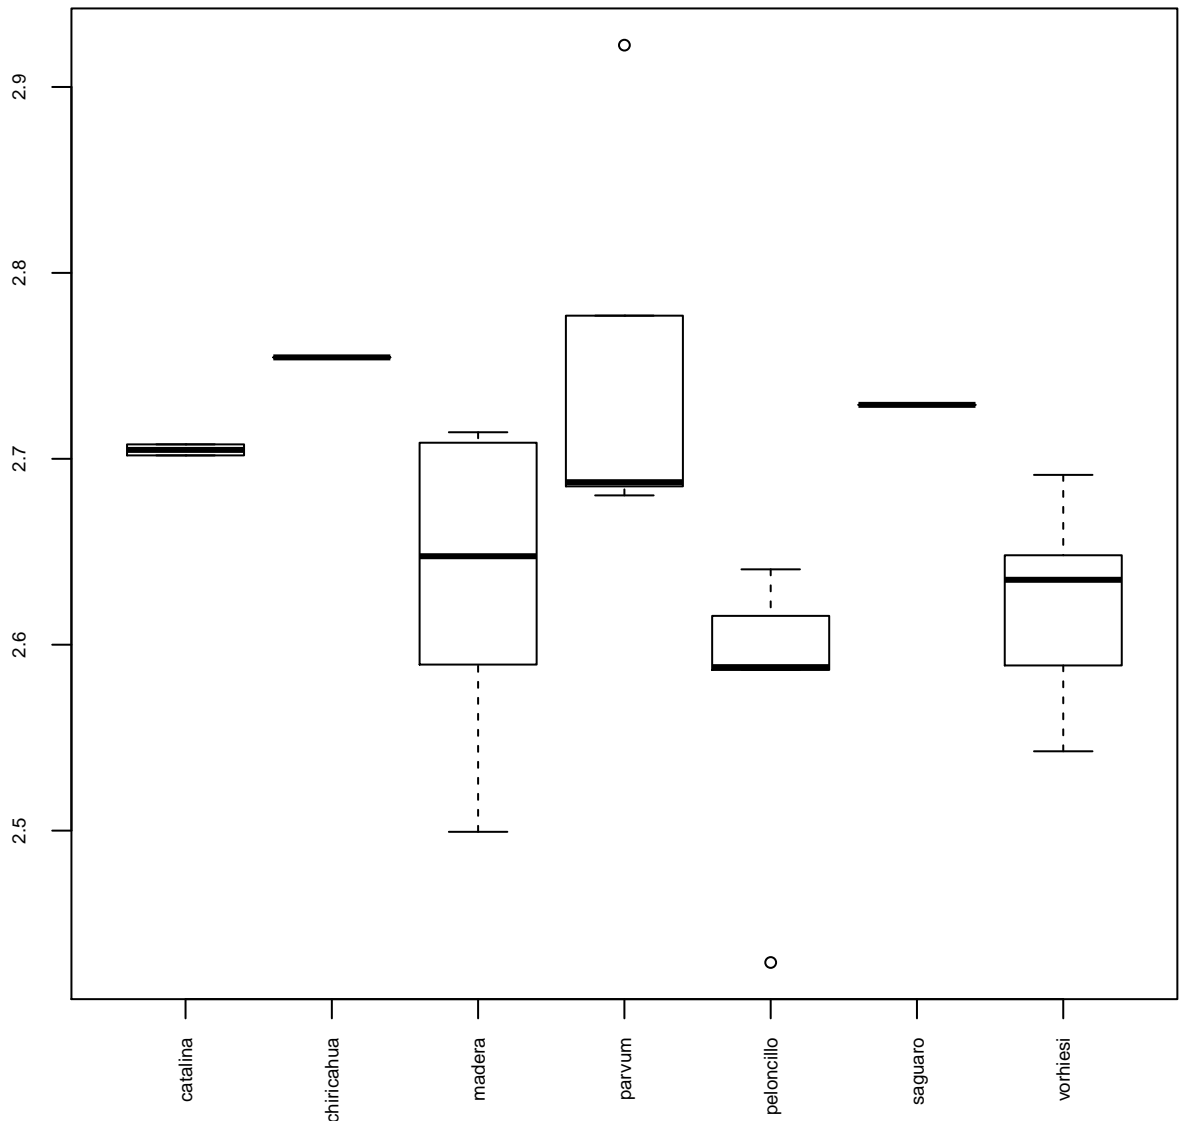

Supplement: Supplementary file 321

## Femur 3/Tarsus 3 ratio – males

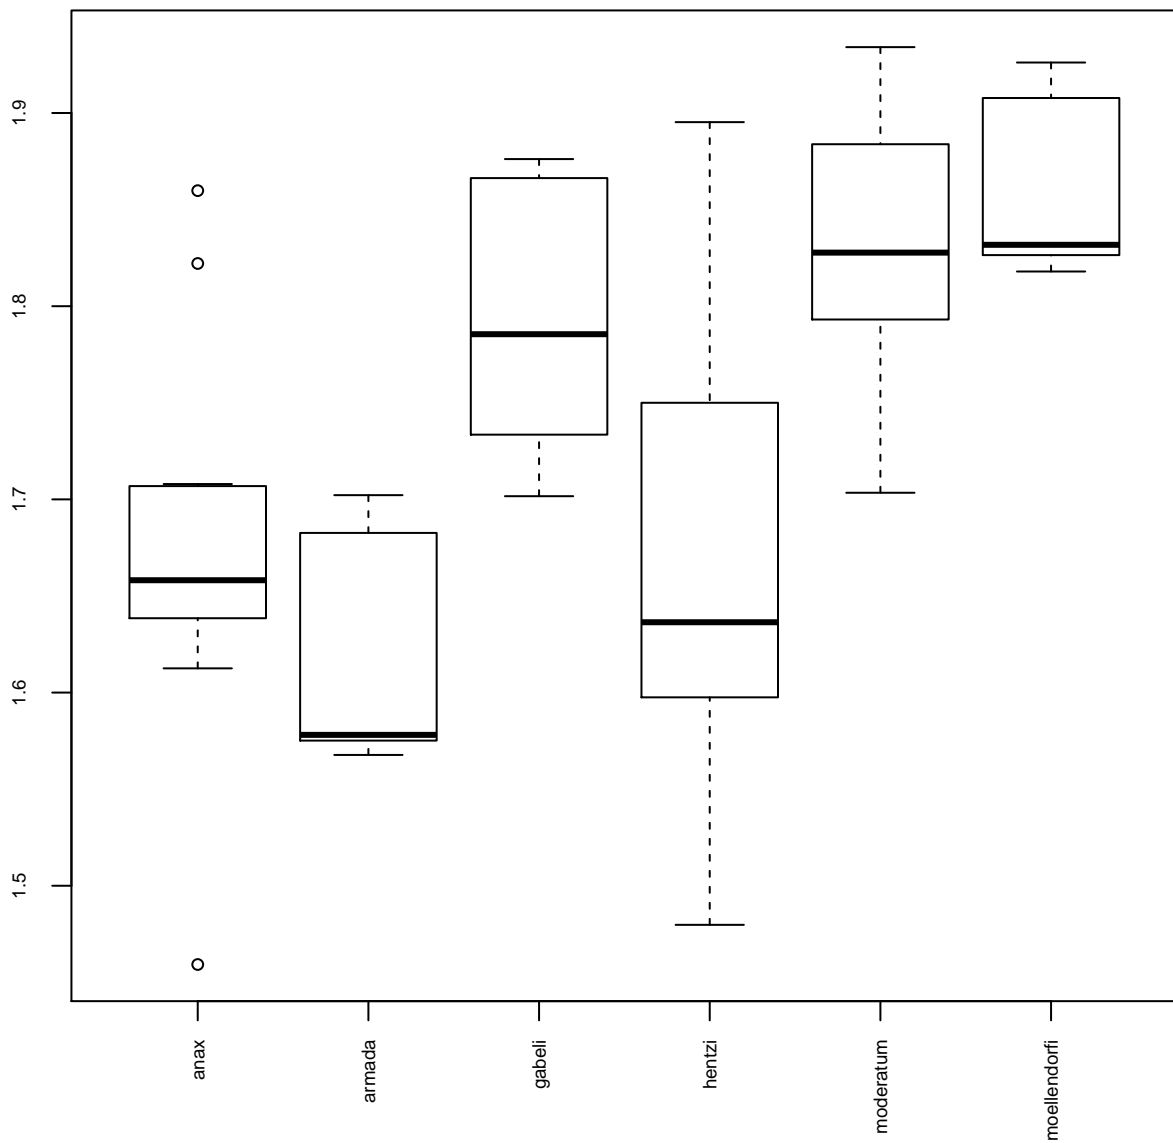

Supplement: Supplementary file 322

## Femur 4/Patella 4 ratio – males

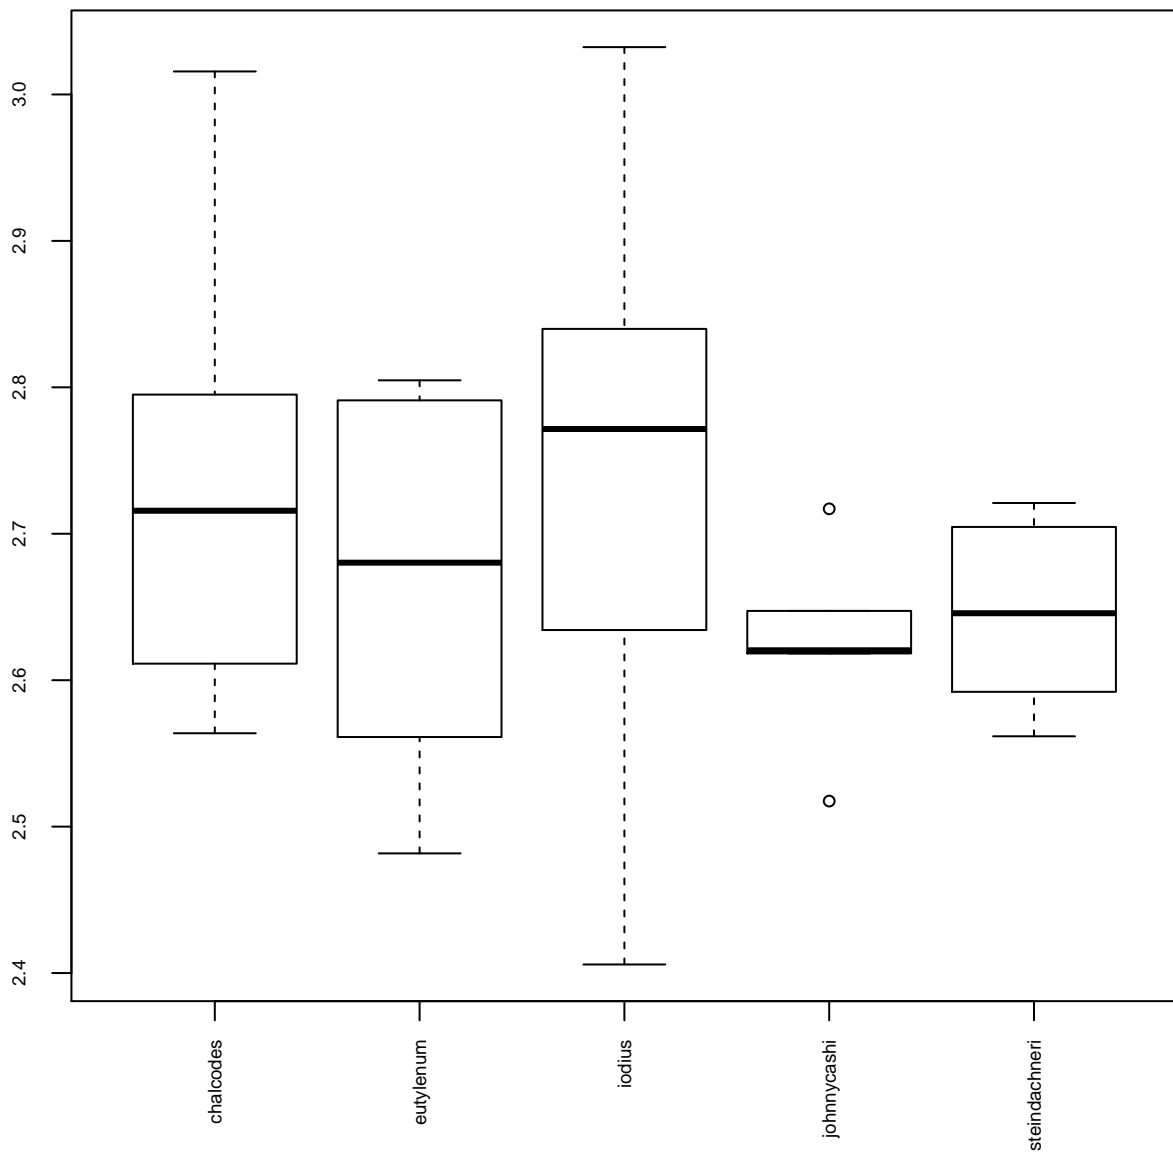

Supplement: Supplementary file 323

## Femur 1 Length/Width ratio – males

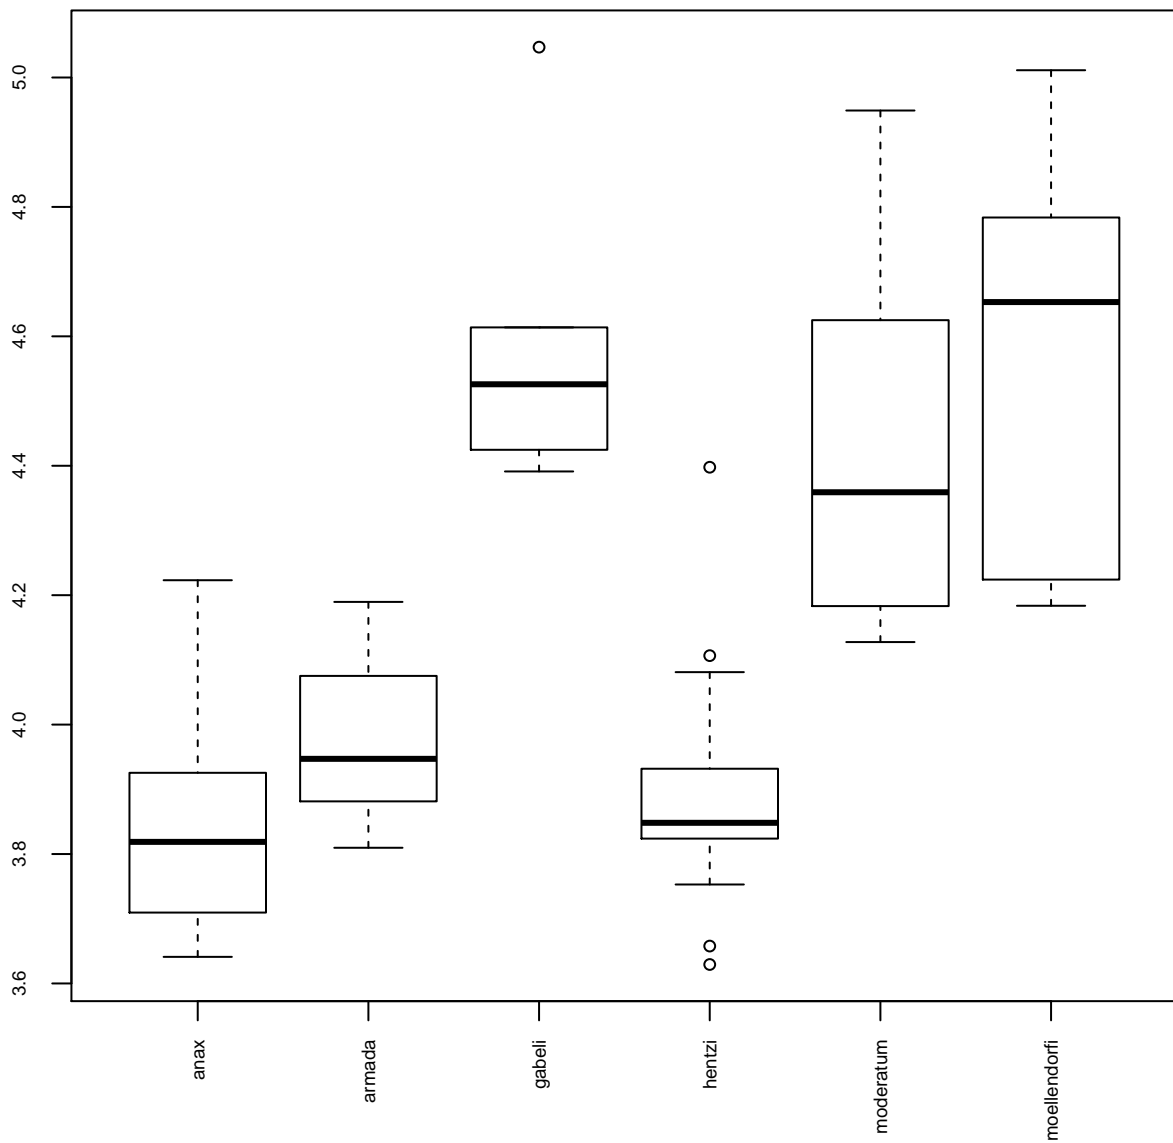

Supplement: Supplementary file 324

## Metatarsus 3/Femur 4 Length ratio – males

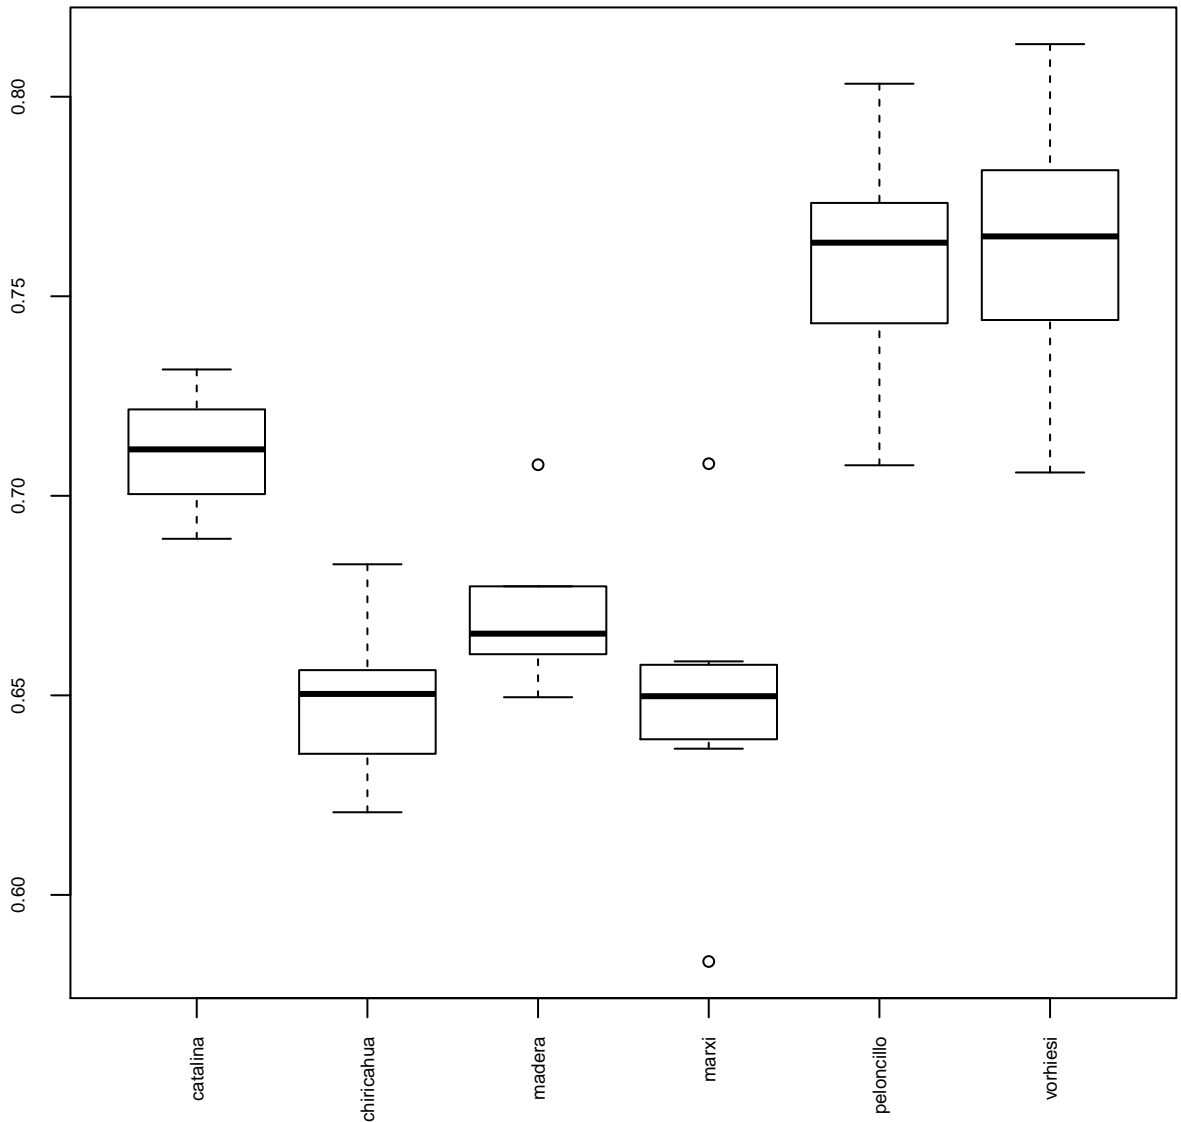

Supplement: Supplementary file 325

## Femur 1/Tibia 3 ratio – males

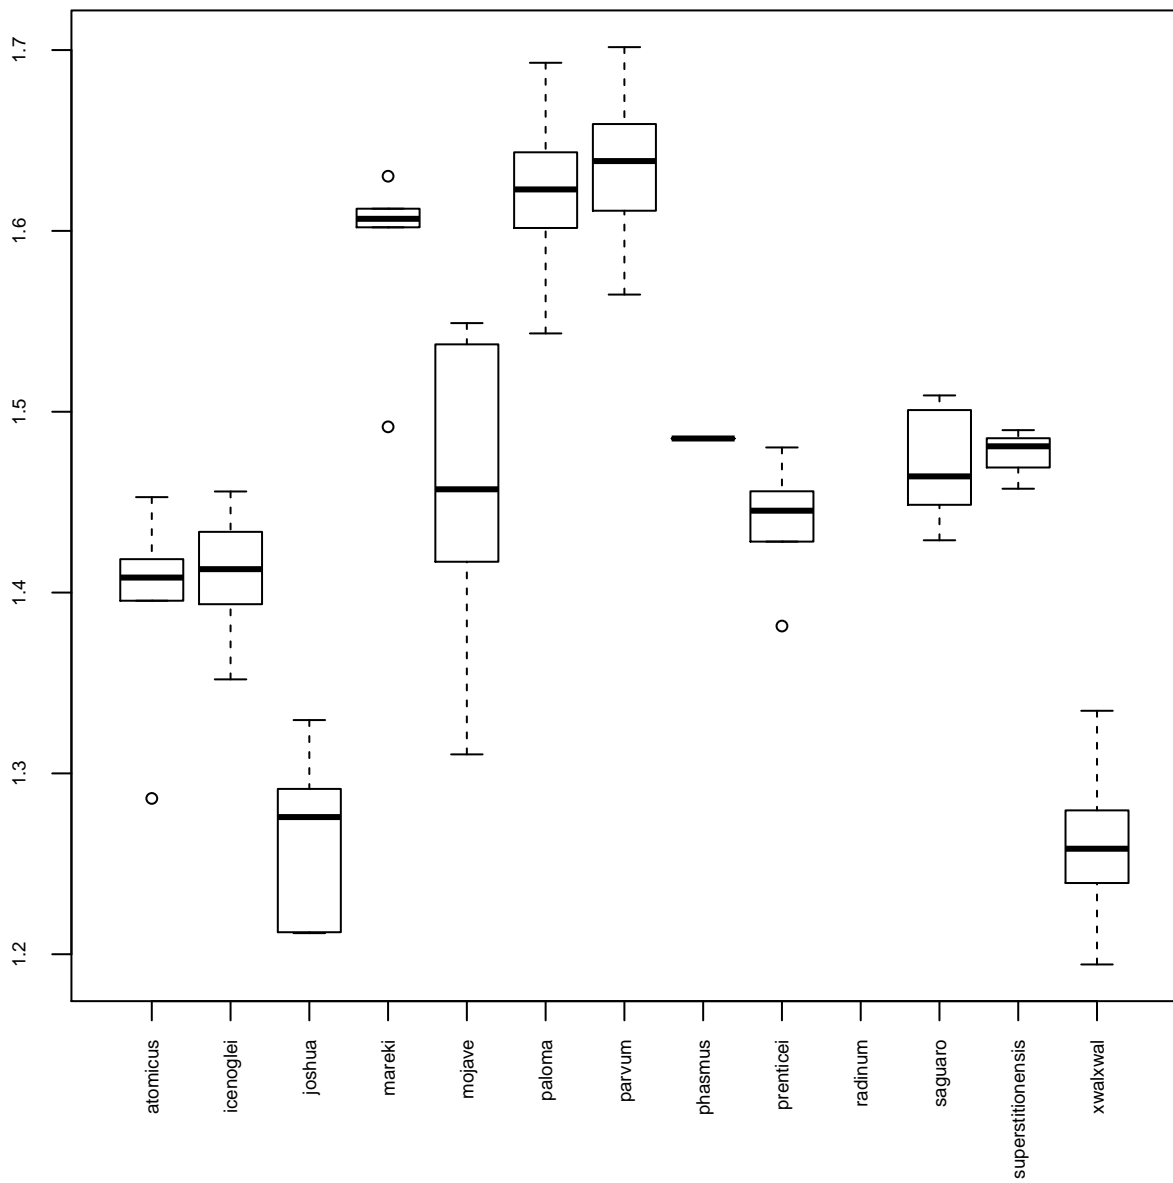

Supplement: Supplementary file 326

## Metatarsus 4/Tarsus 4 ratio – females

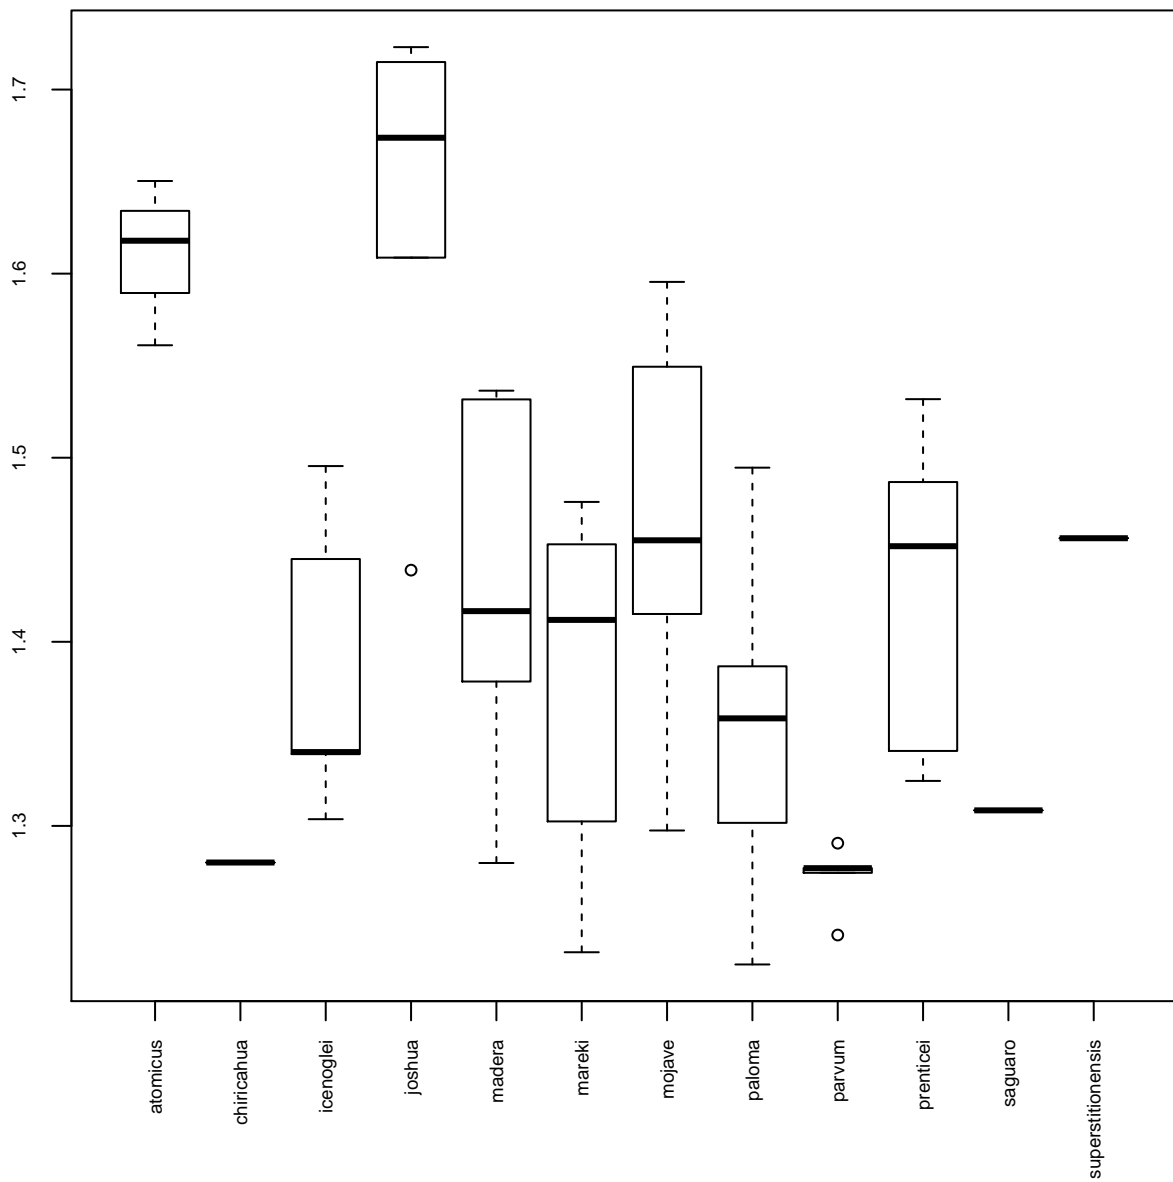

Supplement: Supplementary file 327

## Patella 3/Metatarsus 3 ratio – females

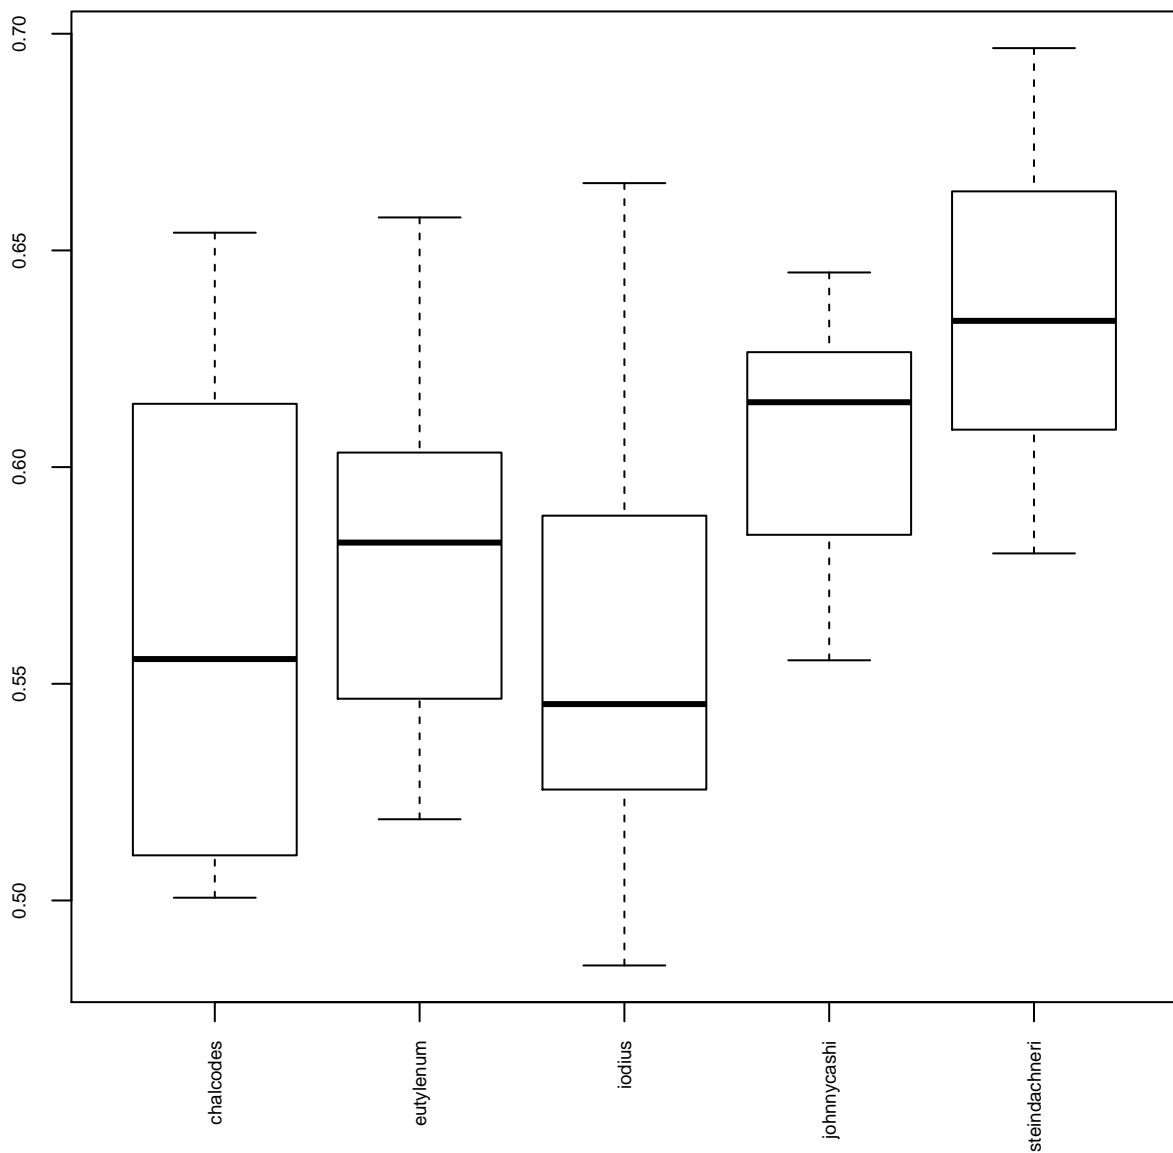

Supplement: Supplementary file 328

## Femur 1/Patella 4 ratio – males

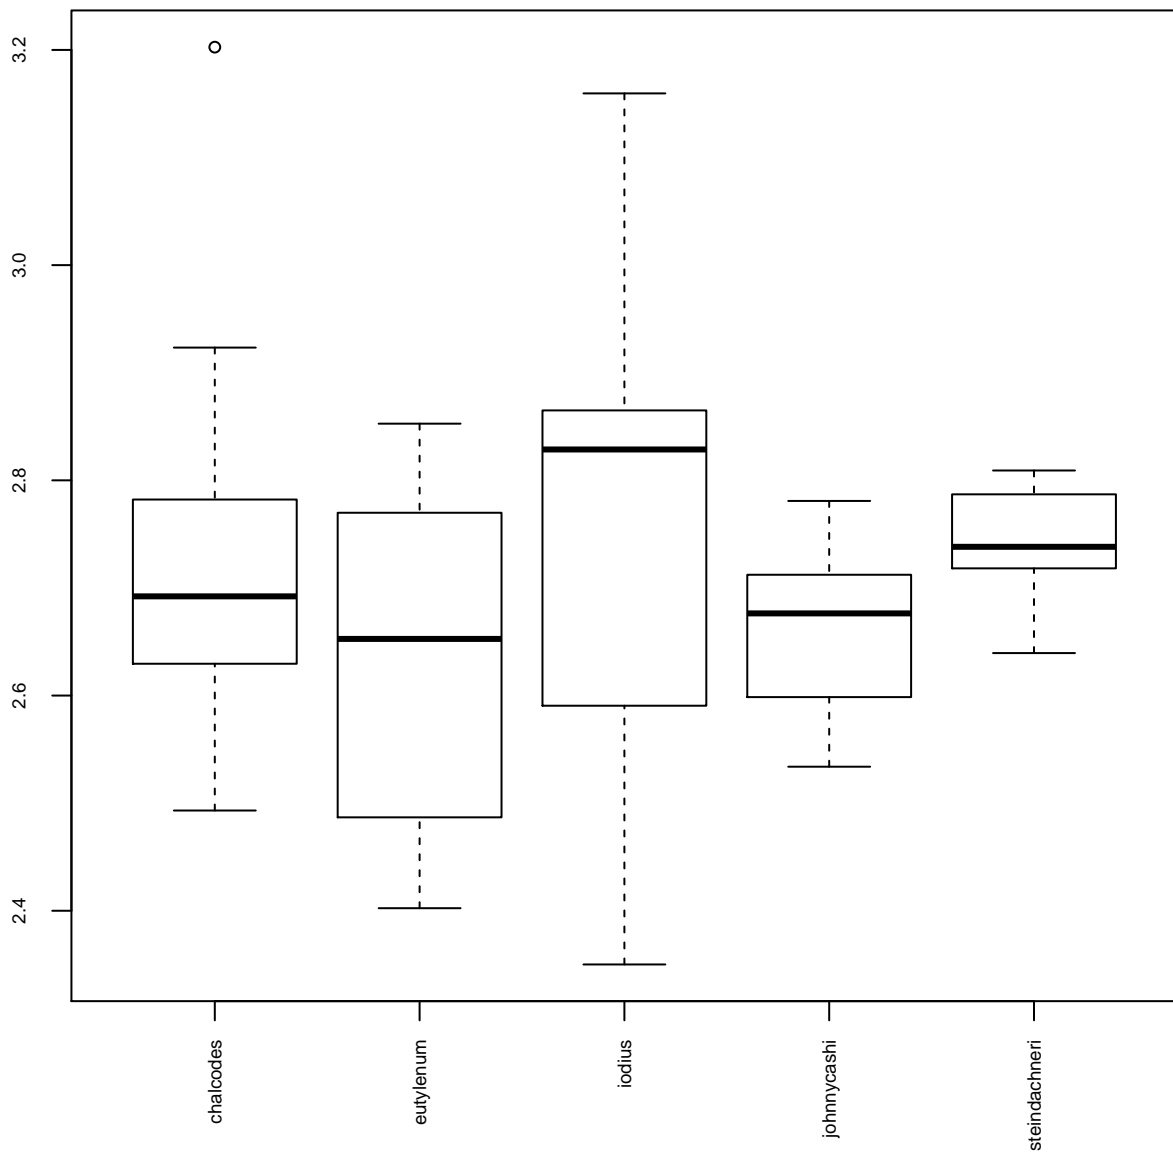

Supplement: Supplementary file 329

## Carapace Length/Patella 4 ratio – females

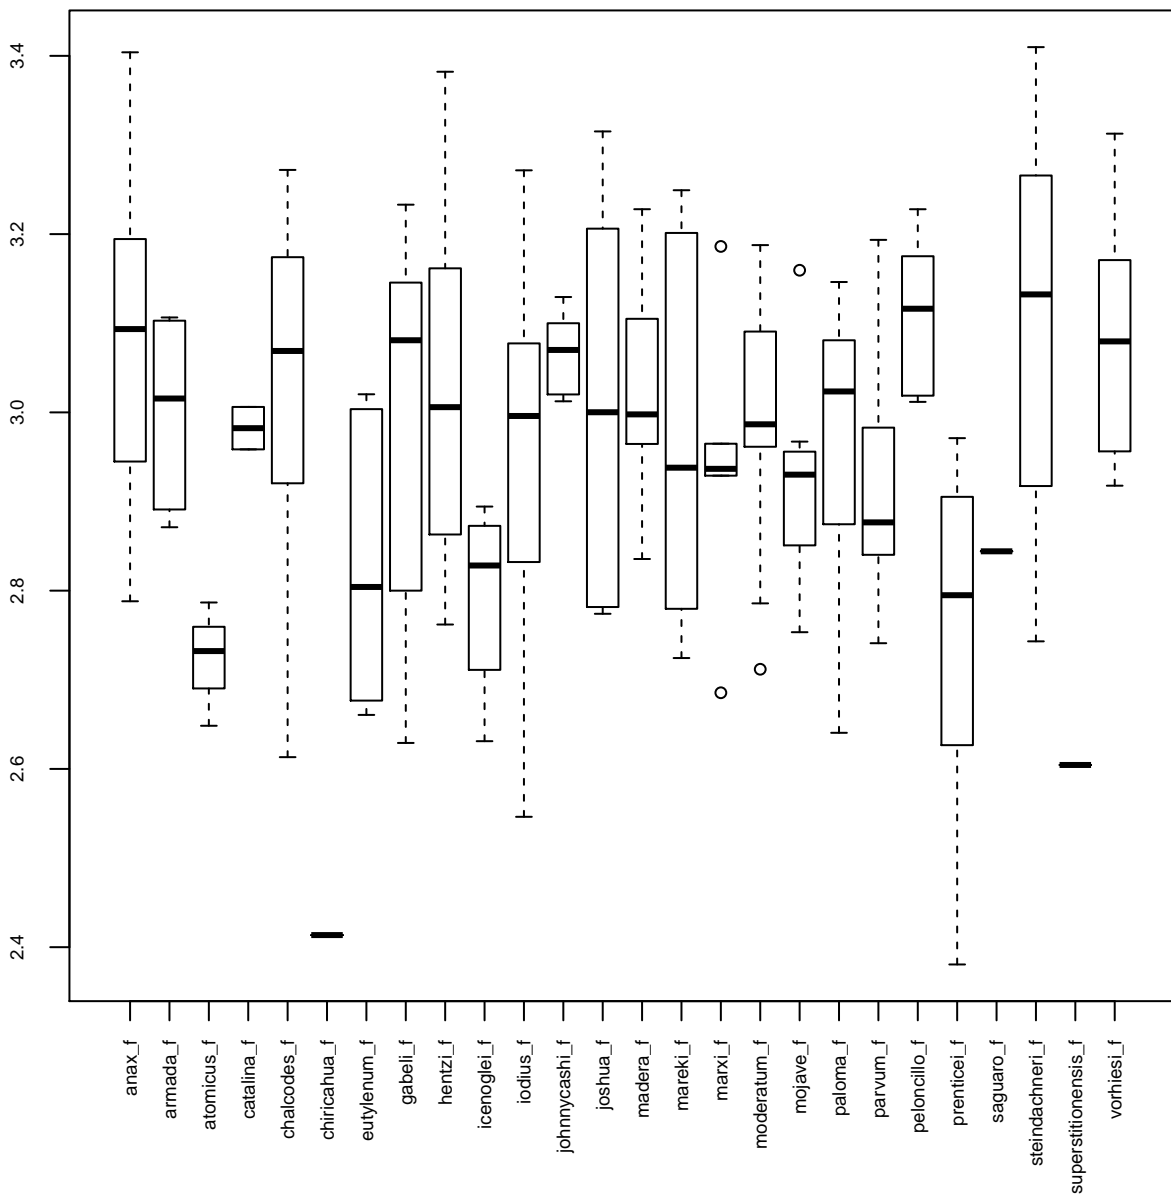

Supplement: Supplementary file 330

## Carapace Length/Metatarsus 1 ratio – females

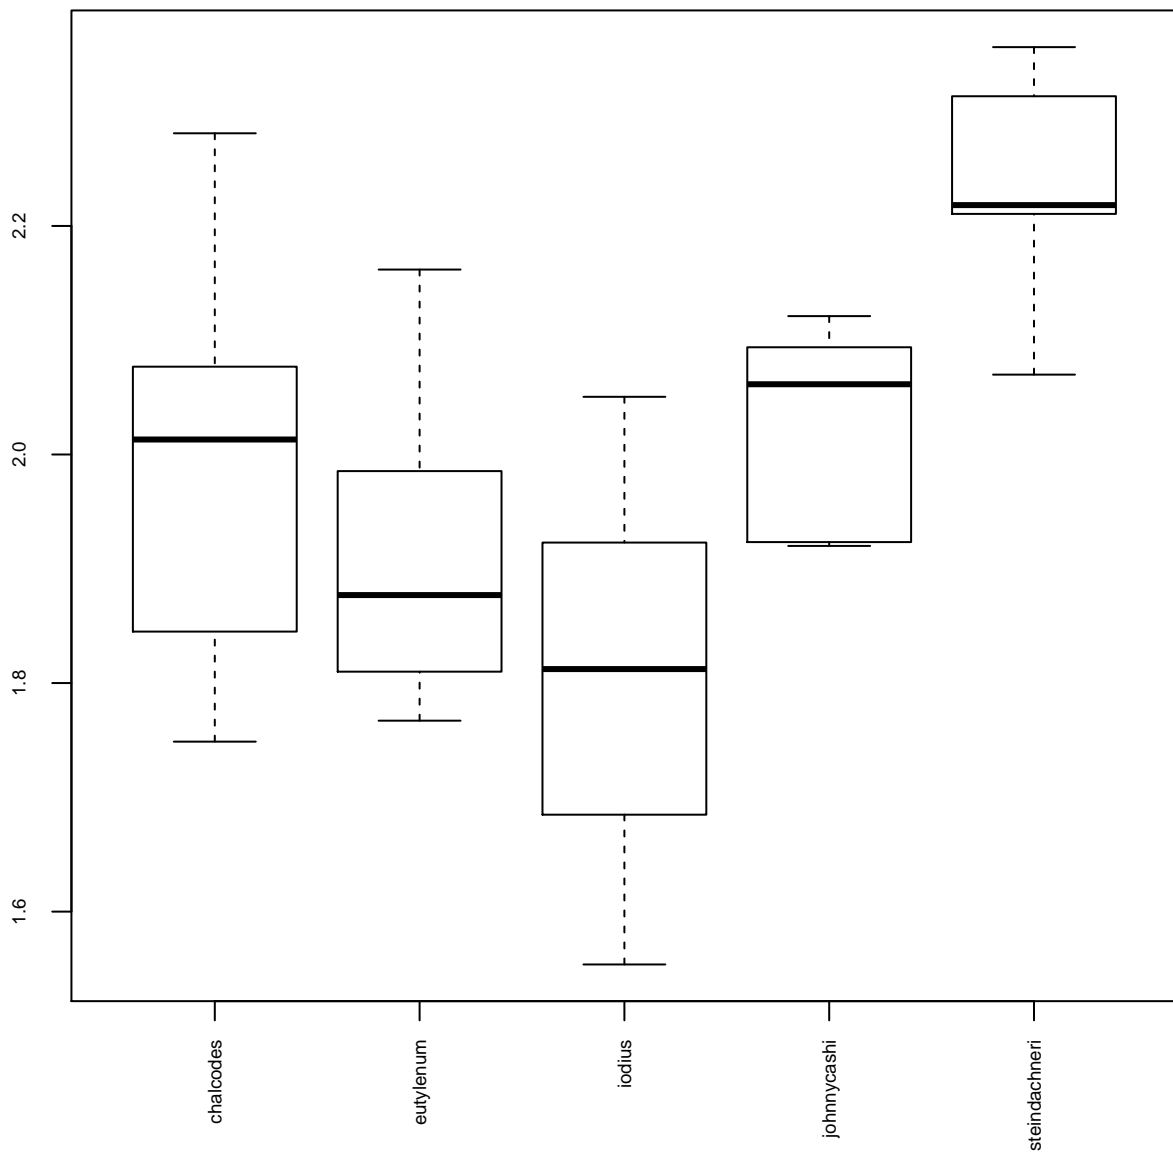

Supplement: Supplementary file 331

# Tibia 1/Tibia 3 ratio – males

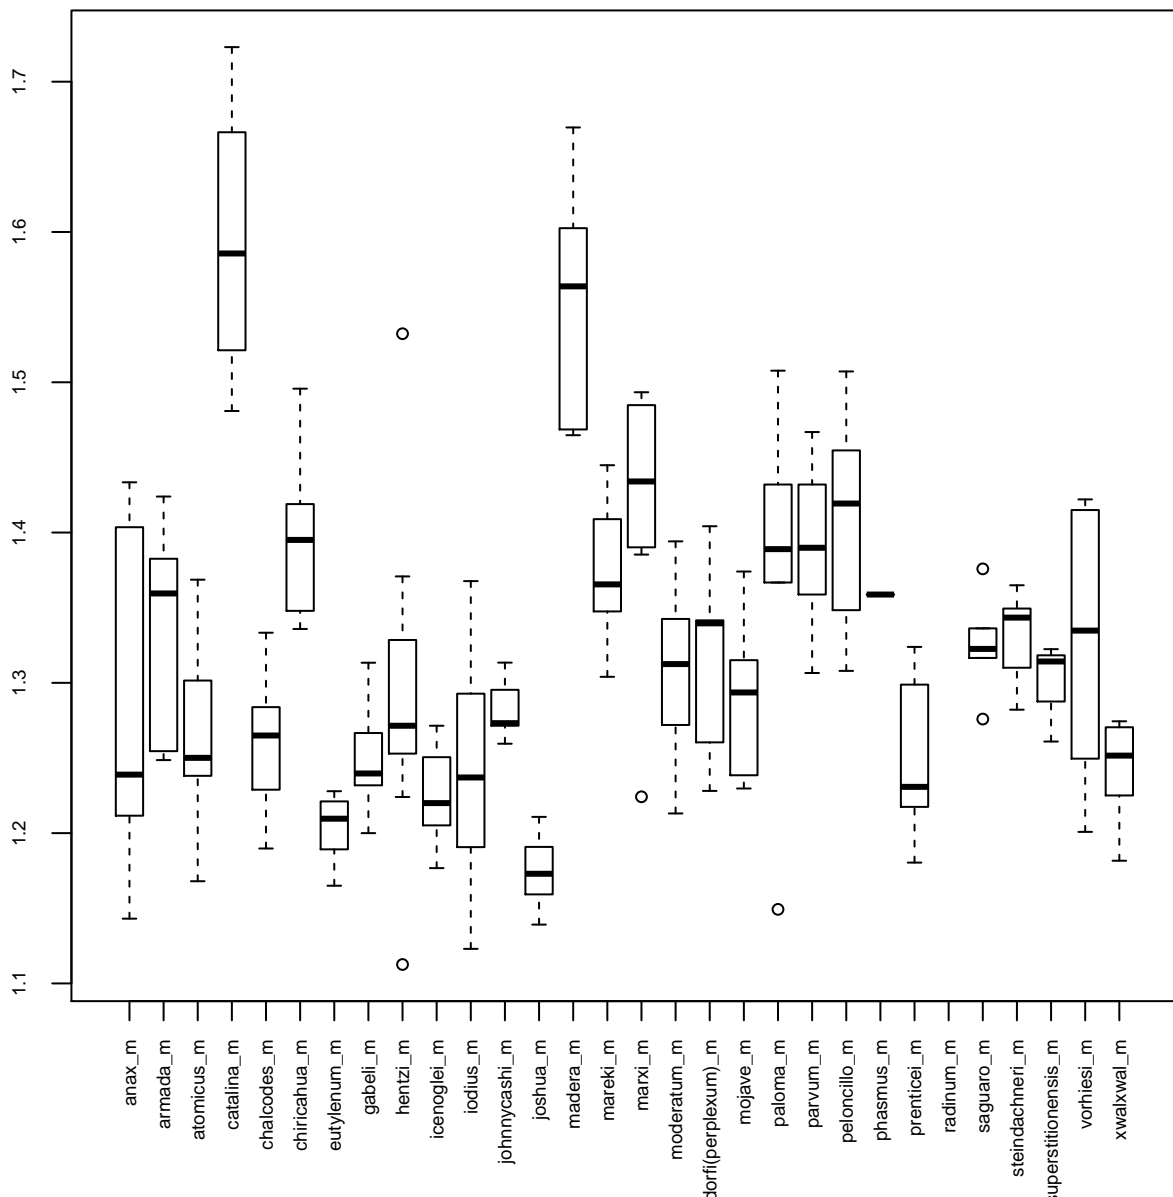

Supplement: Supplementary file 332

## Femur 4/Patella 4 ratio – females

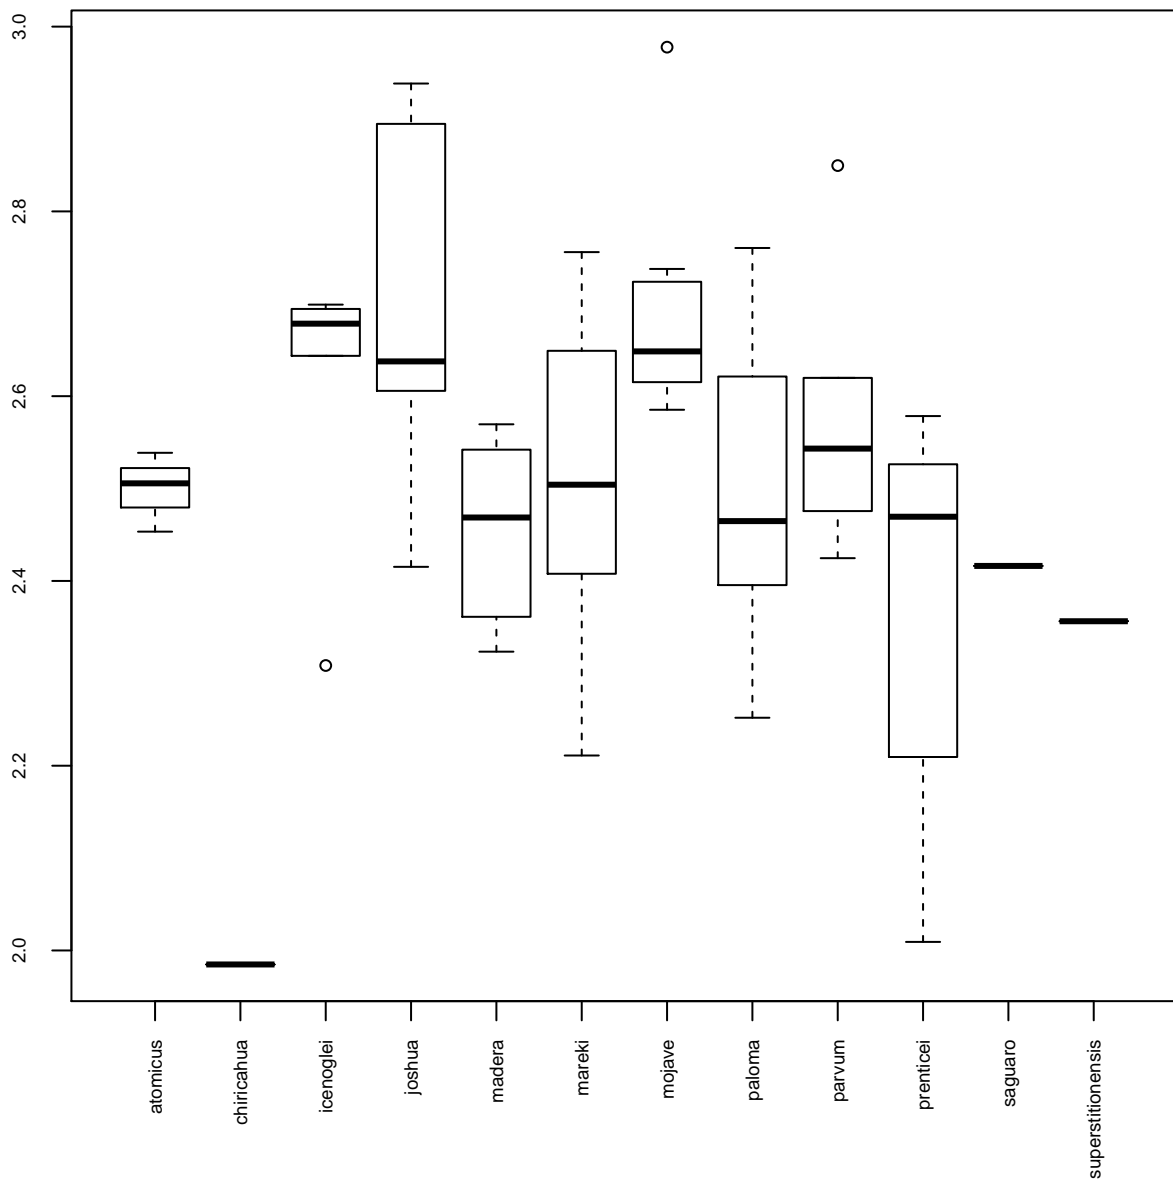

Supplement: Supplementary file 333

## Leg 1/Leg 4 Length ratio – males

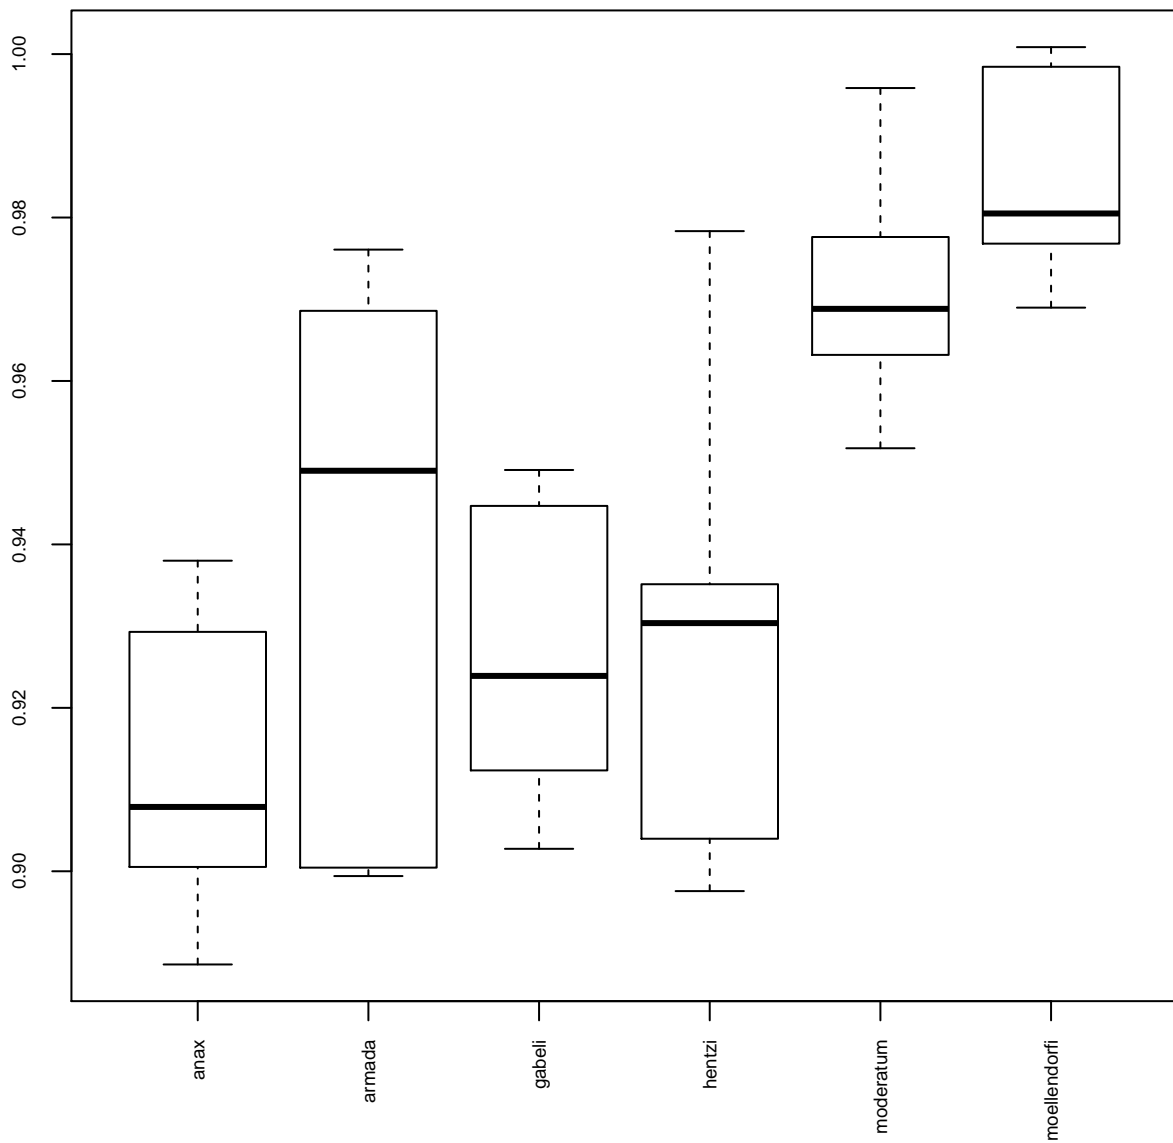

Supplement: Supplementary file 334

## Carapace Length/Tibia 3 ratio – males

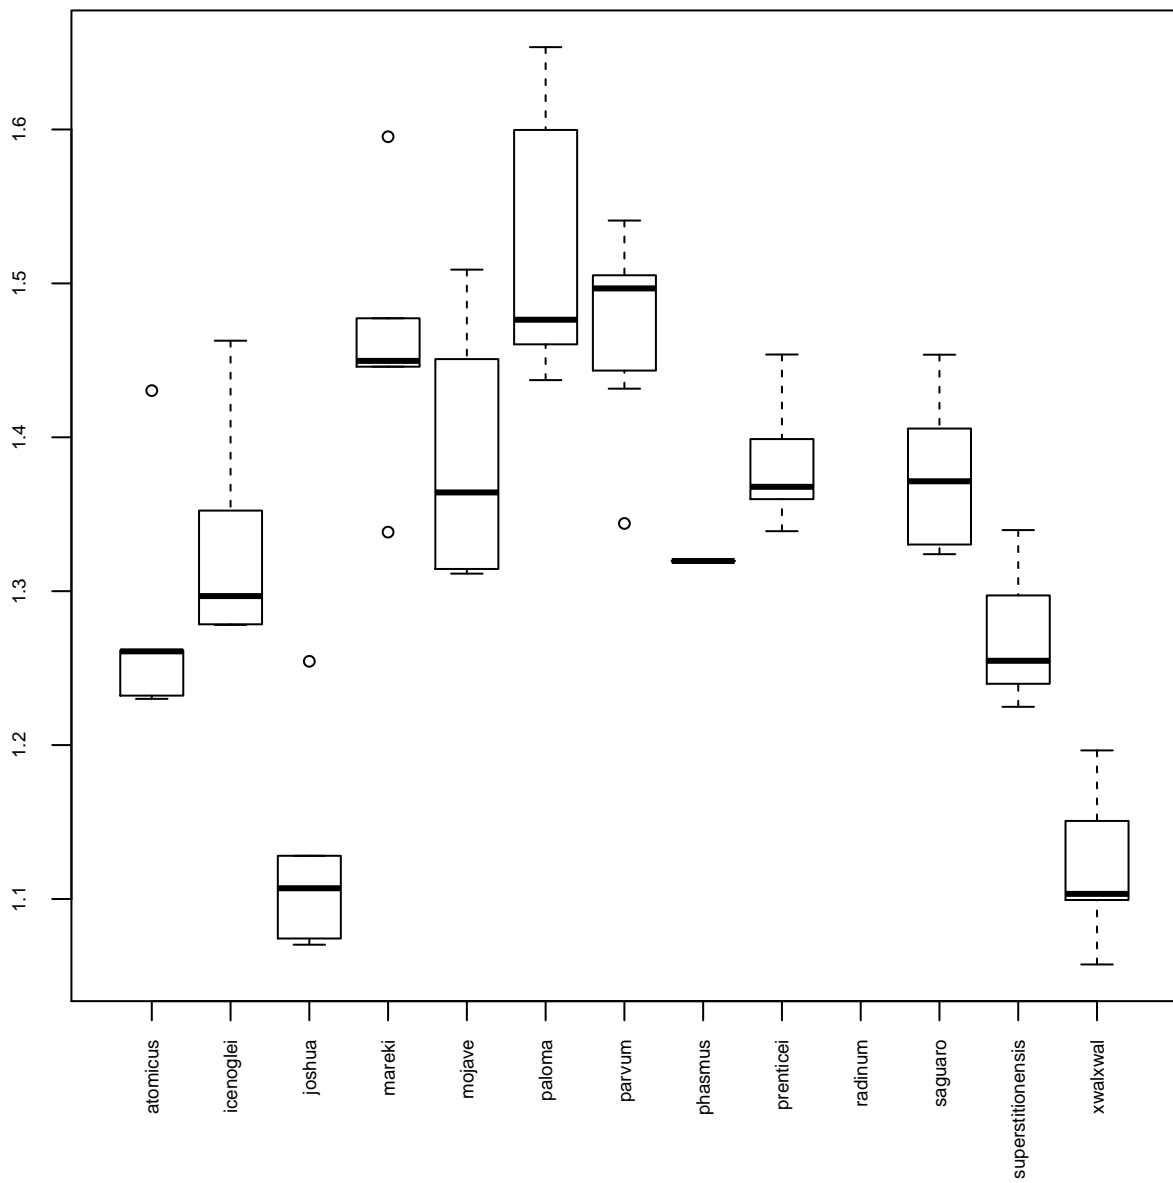

Supplement: Supplementary file 335

## Tarsus 3/Tarsus 4 ratio – females

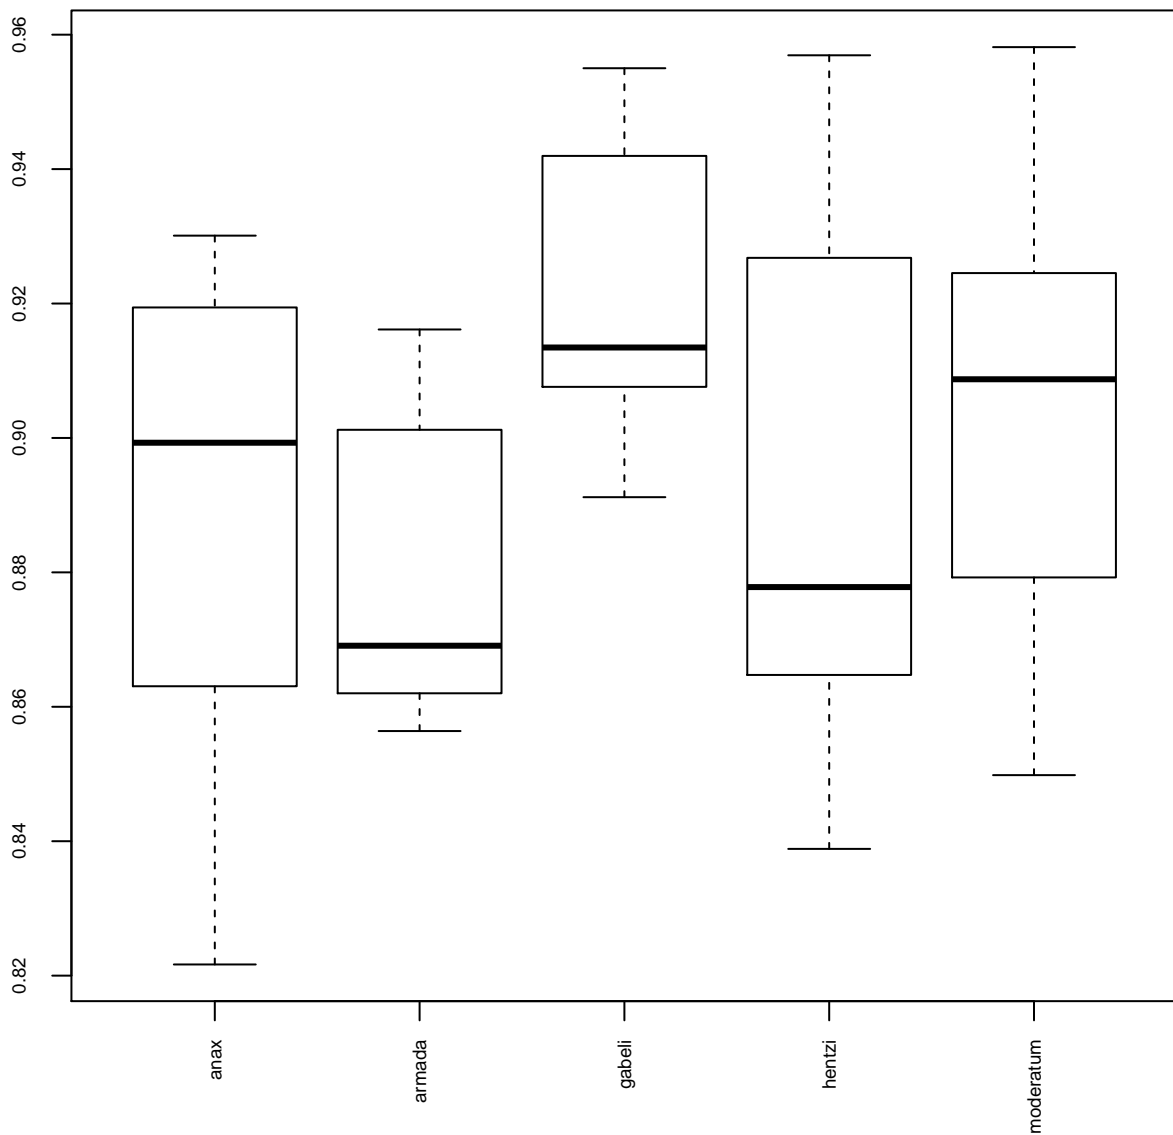

Supplement: Supplementary file 336

## Carapace Length/Femur 3 ratio – males

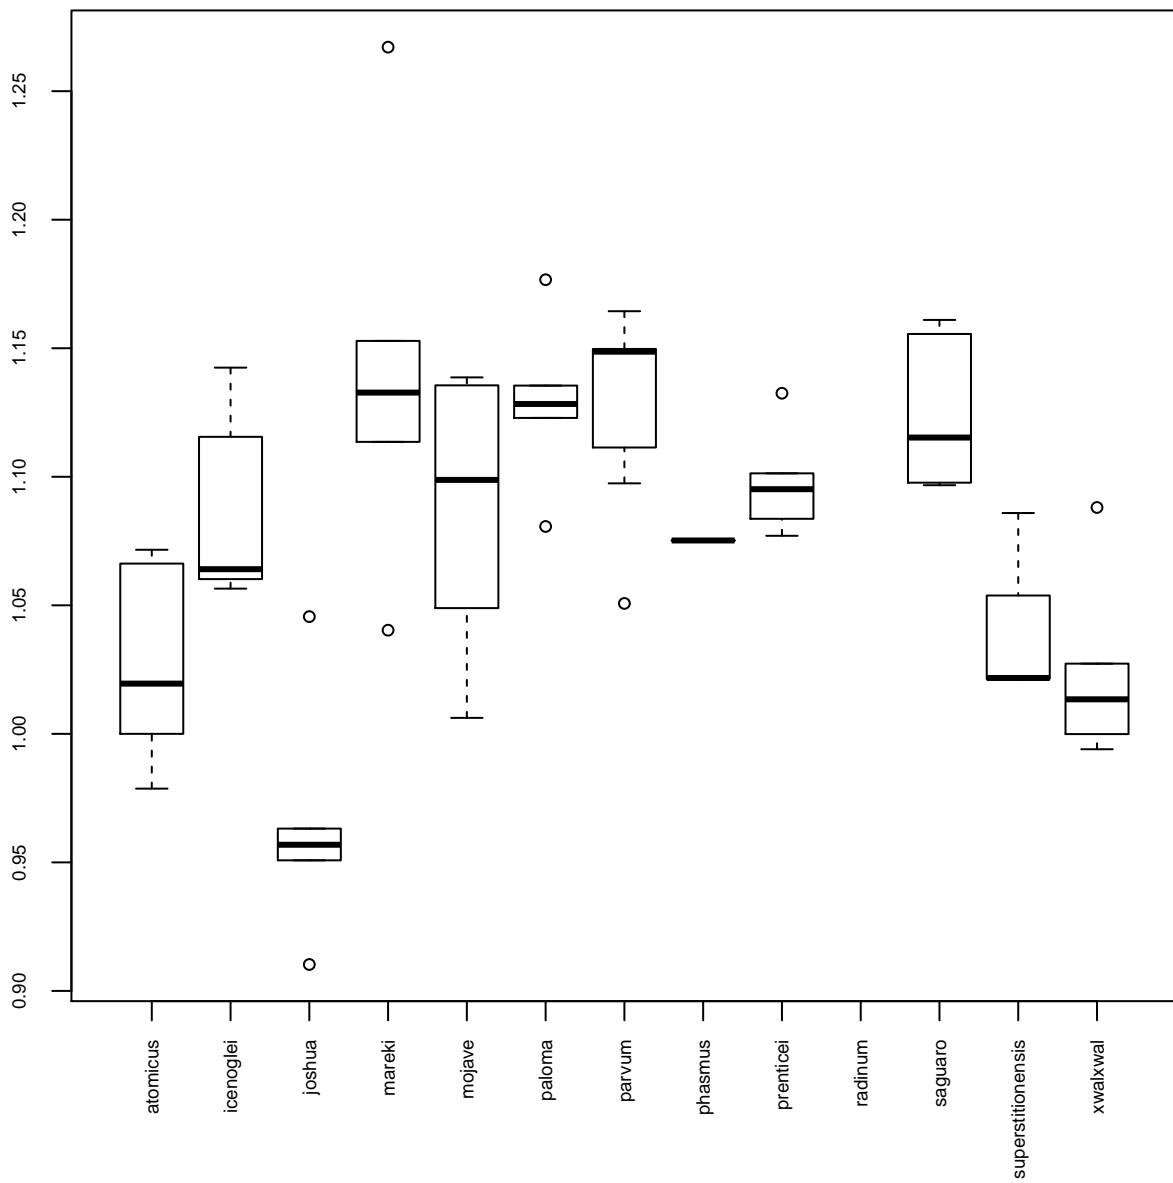

Supplement: Supplementary file 337

## Femur 1/Metatarsus 4 ratio – females

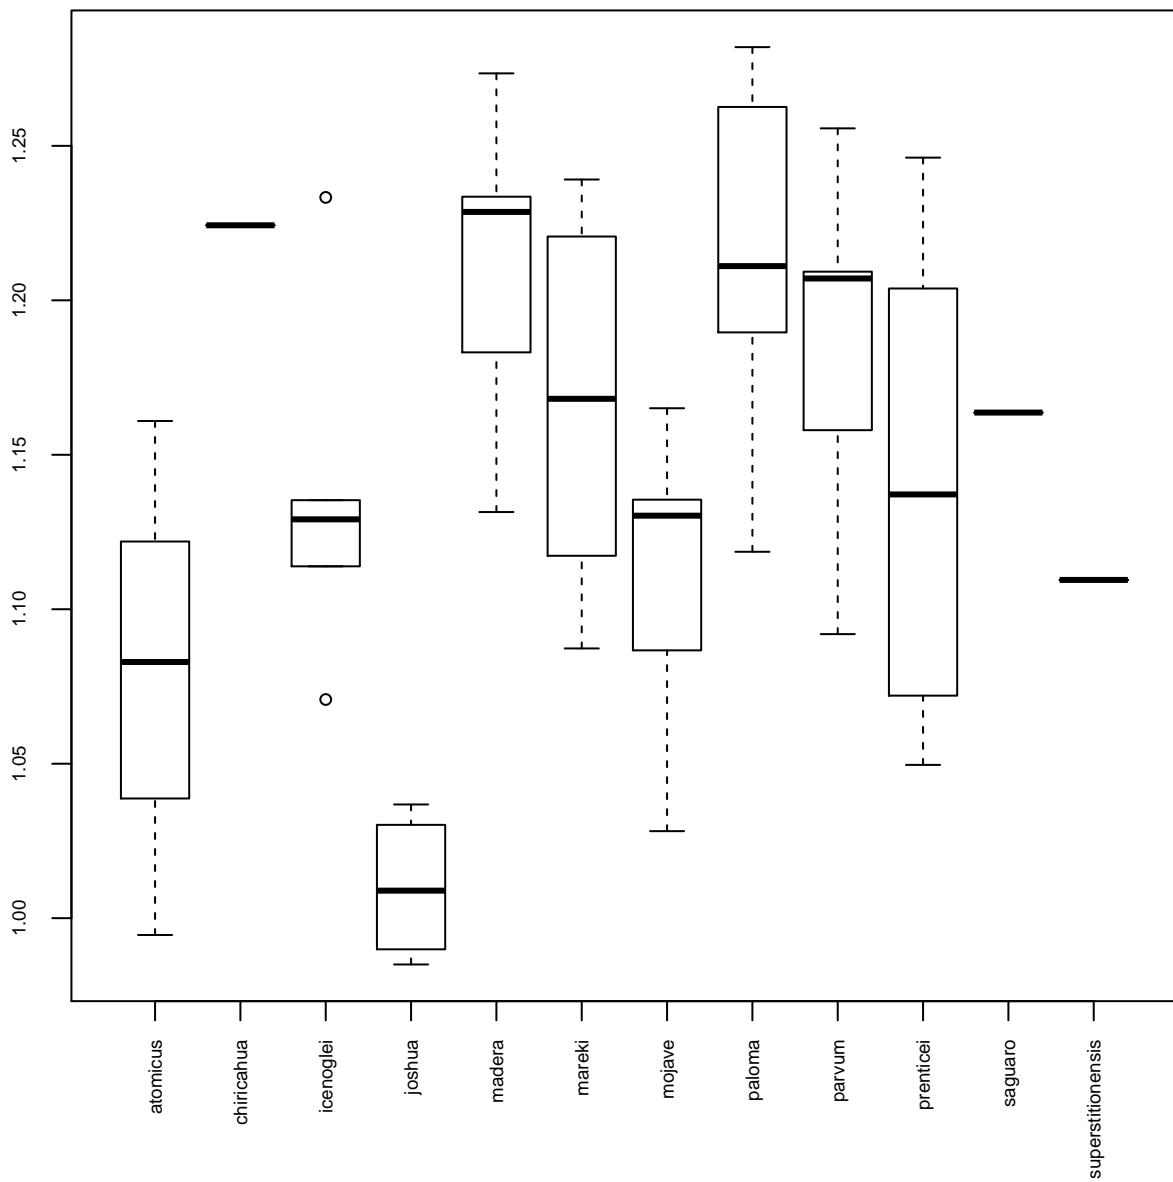

Supplement: Supplementary file 338

## Femur 4/Patella 4 ratio – females

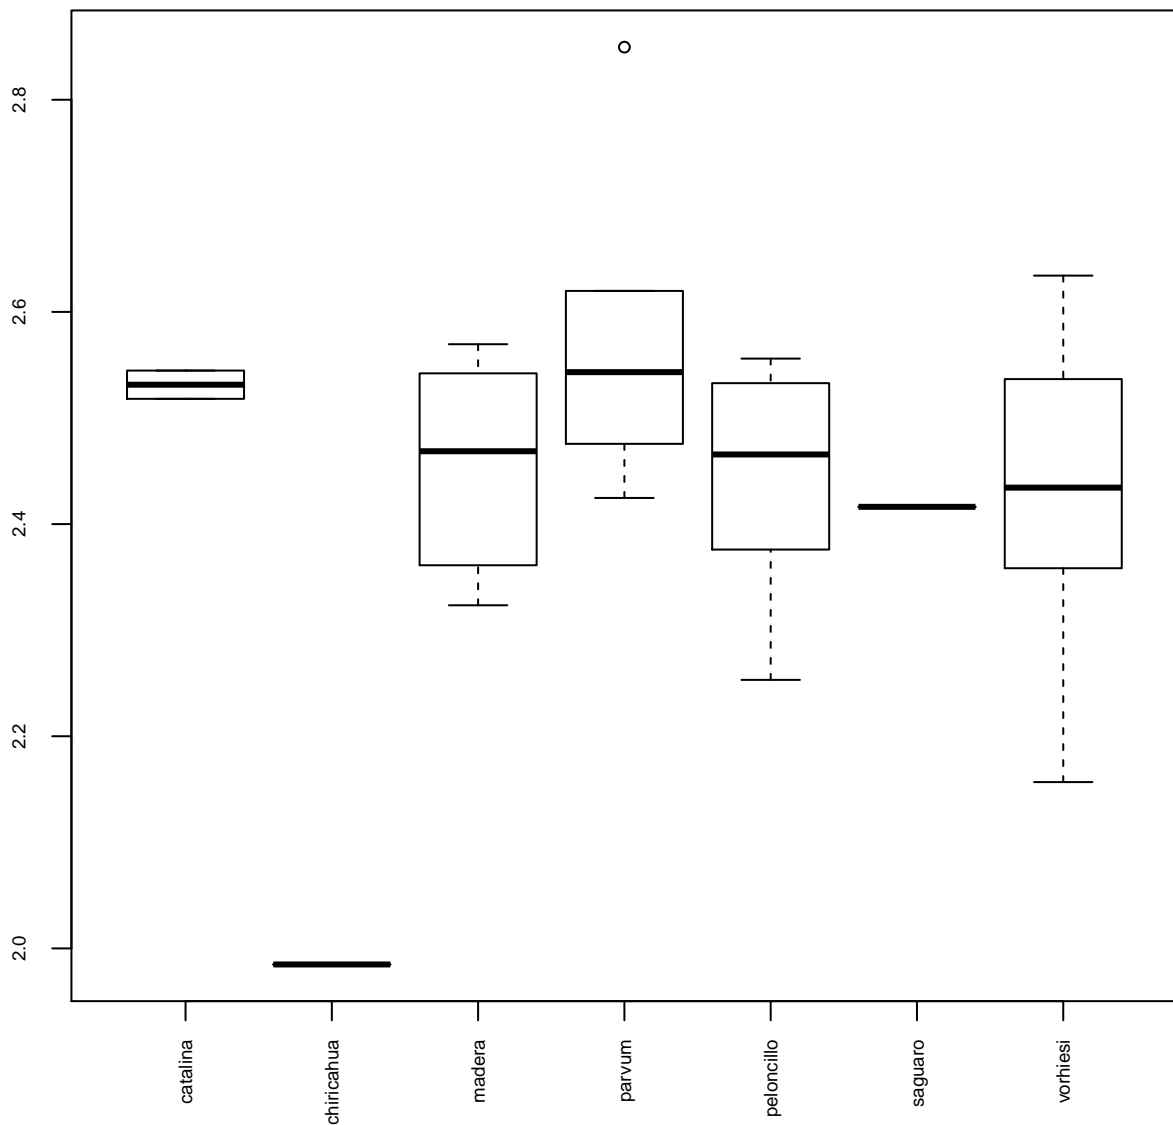

Supplement: Supplementary file 339

# Patella 4/Tibia 4 ratio – males

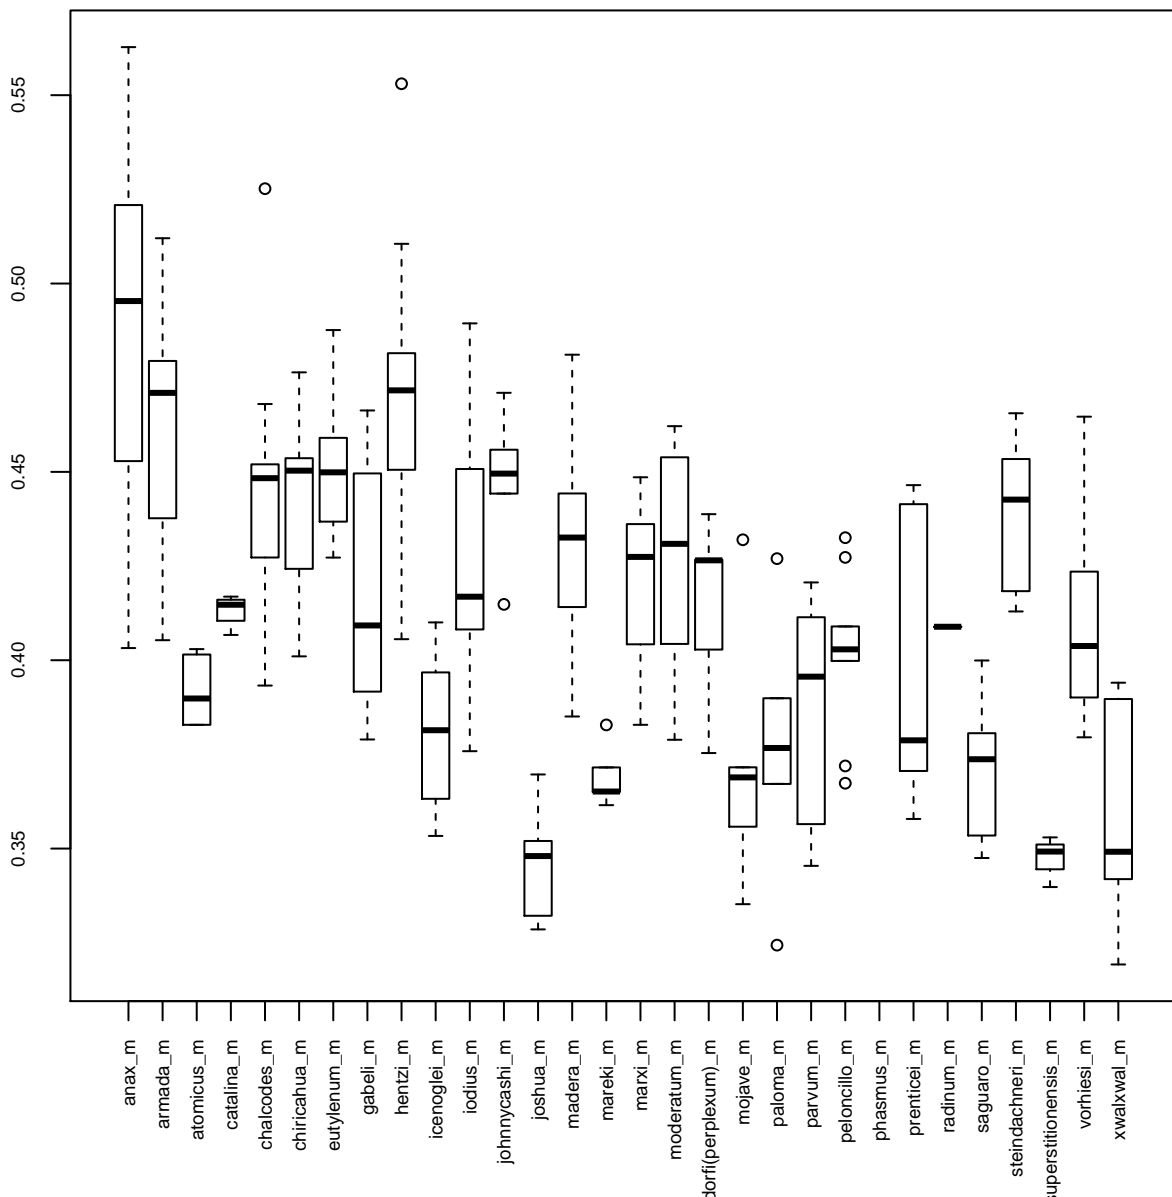

Supplement: Supplementary file 340

# Carapace Length – males

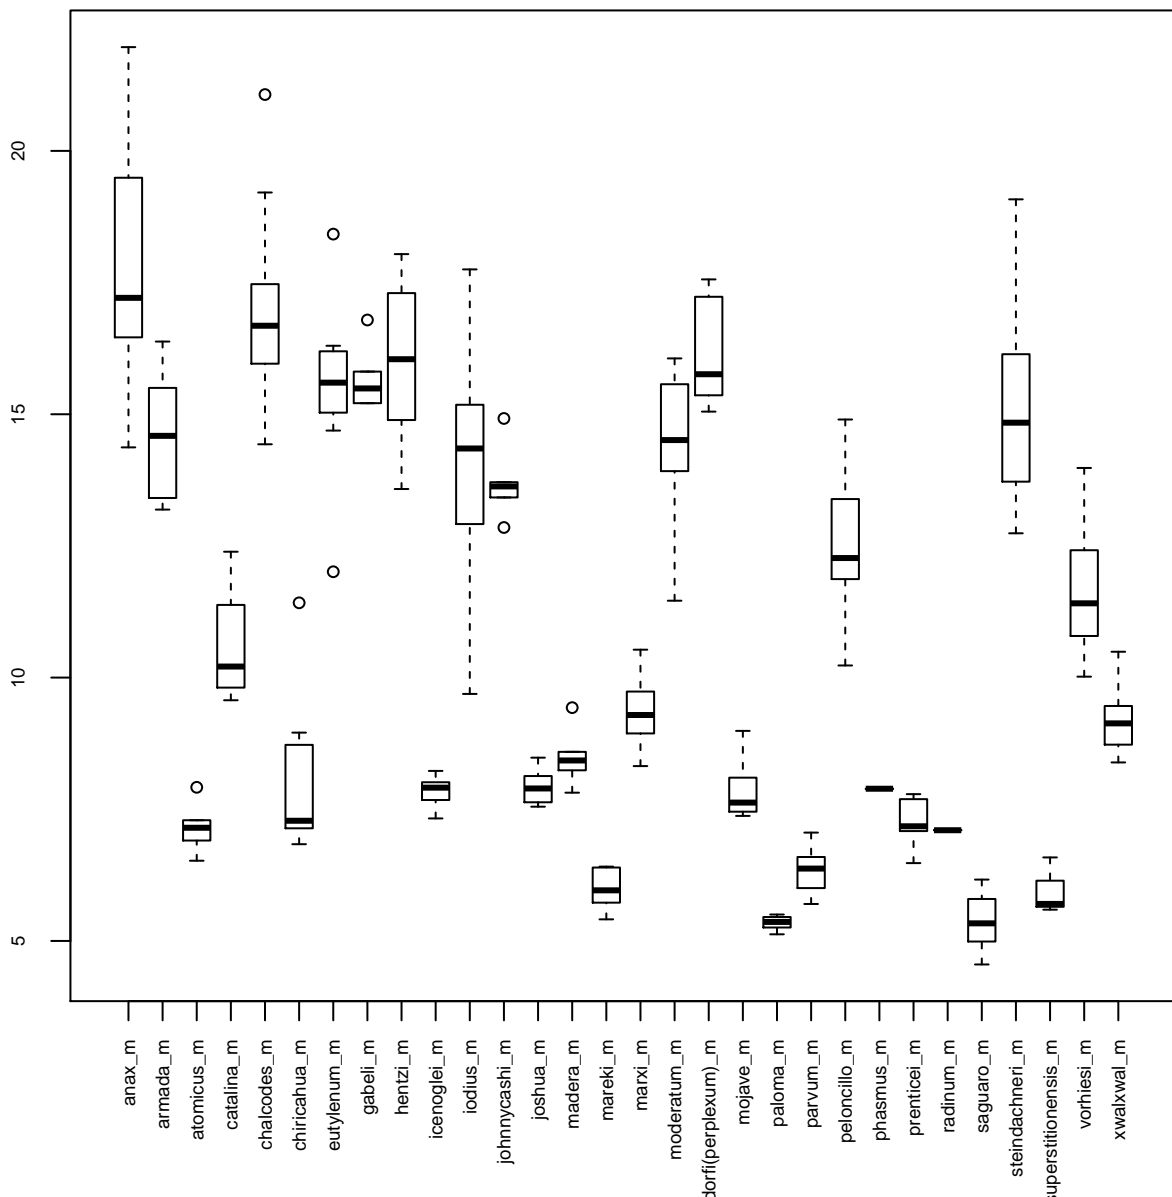

Supplement: Supplementary file 341

## Carapace Length/Patella 4 ratio – females

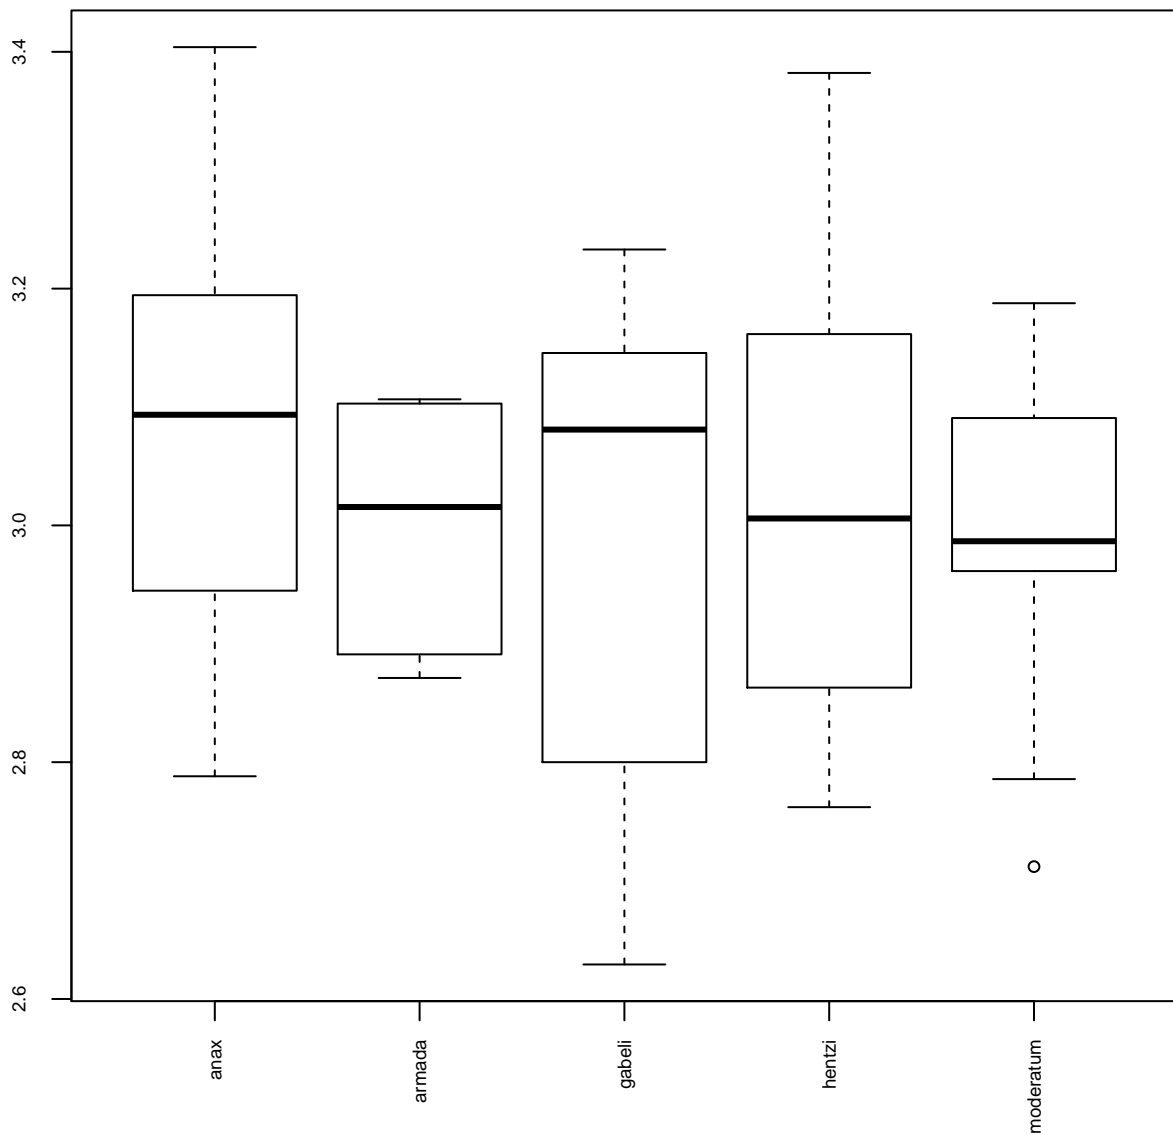

Supplement: Supplementary file 342

## Patella 3/Patella 4 ratio – females

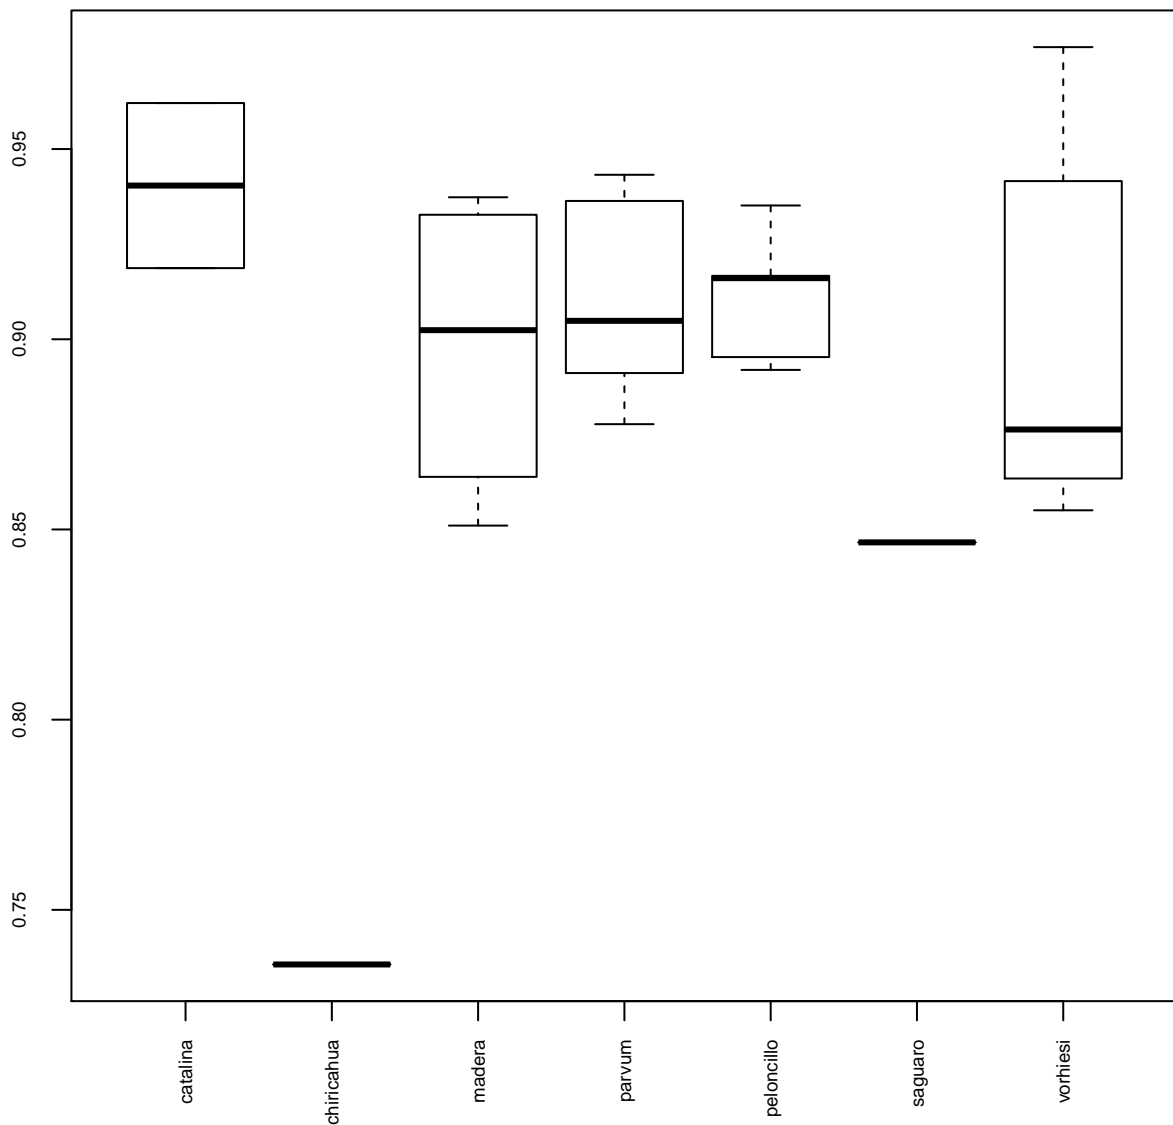

Supplement: Supplementary file 343

## Metatarsus 1/Tarsus 1 ratio – males

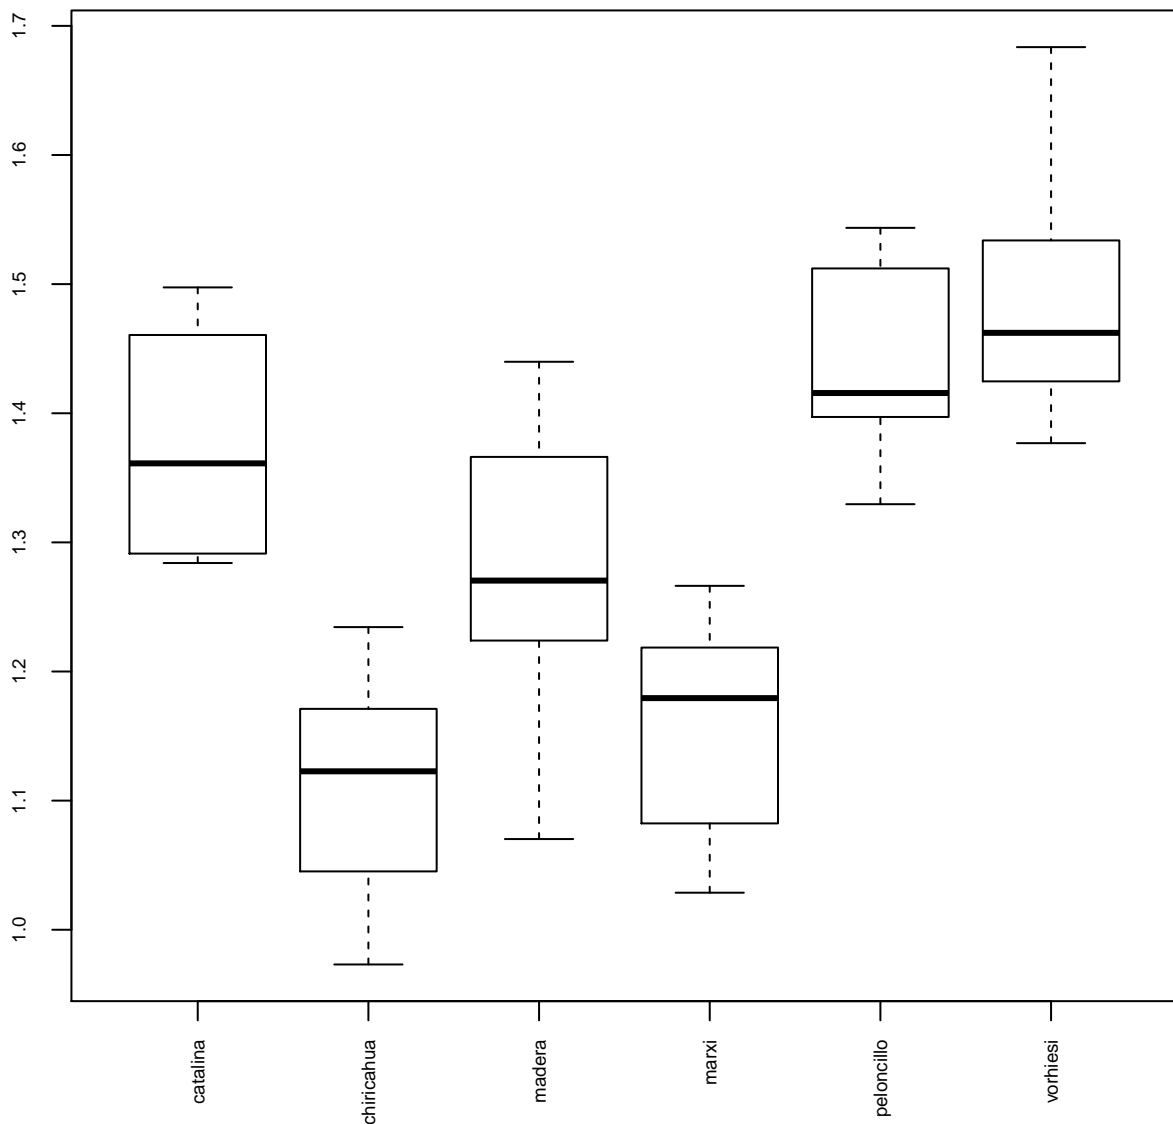

Supplement: Supplementary file 344

## Patella 4/Metatarsus 4 ratio – males

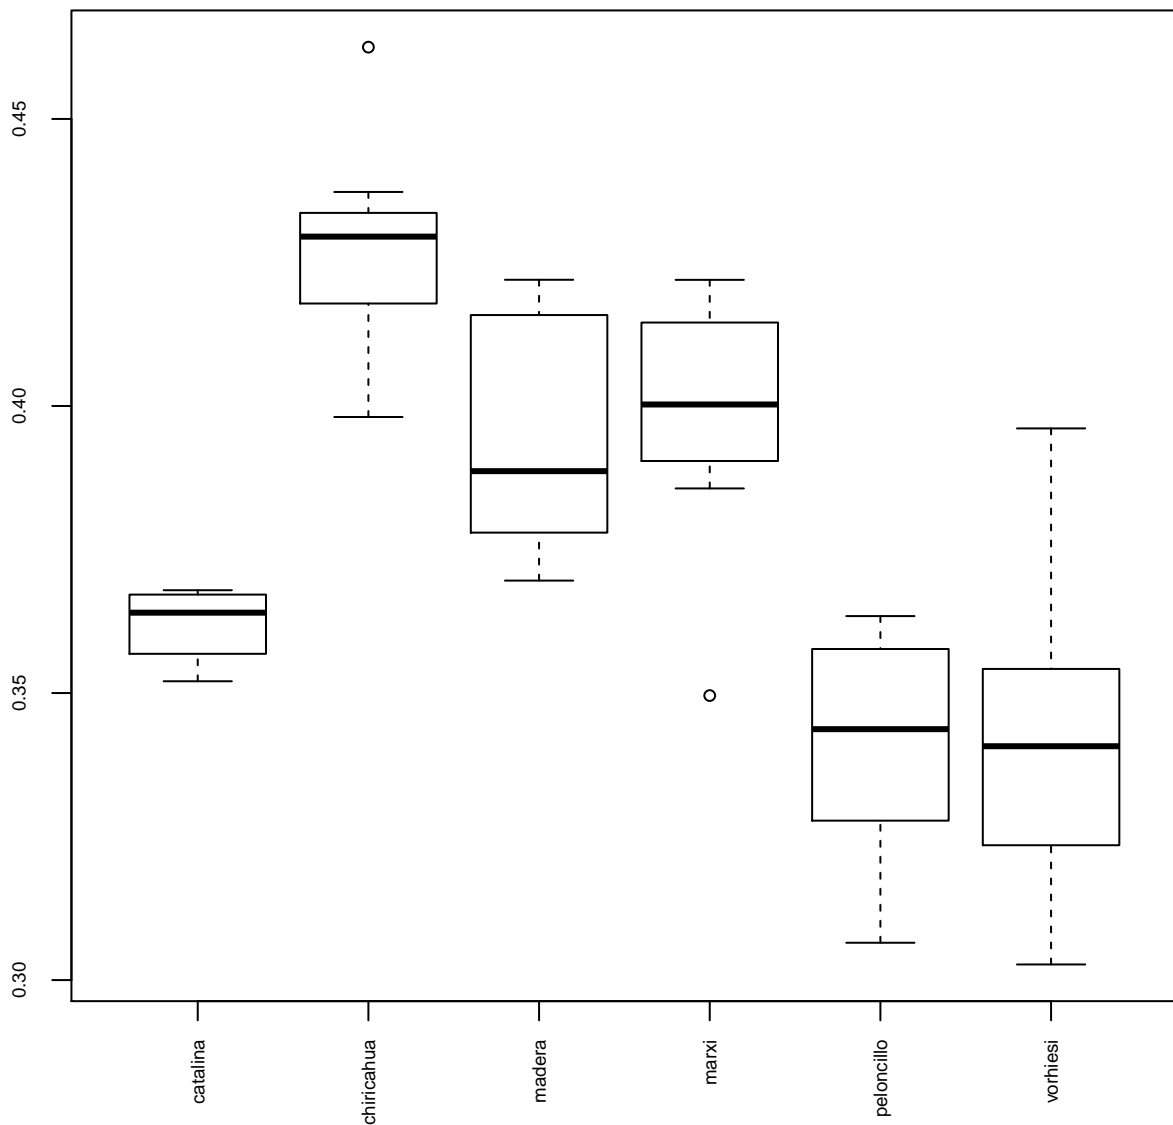

Supplement: Supplementary file 345

# Tibia 1/Femur 3 Length ratio – females

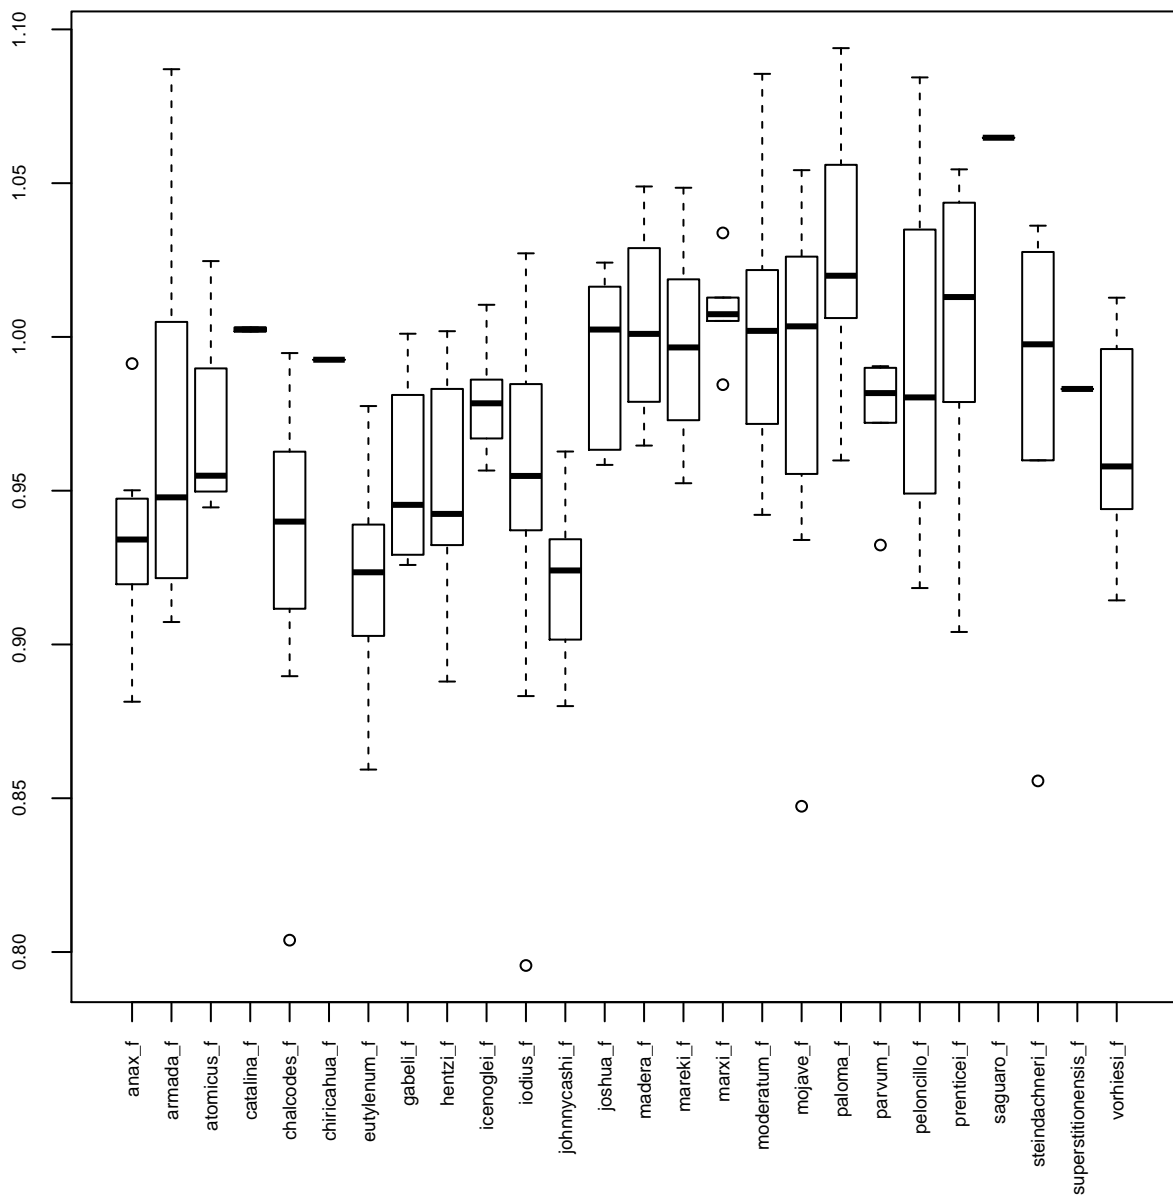

Supplement: Supplementary file 346

# Tibia 1/Femur 4 Length ratio – females

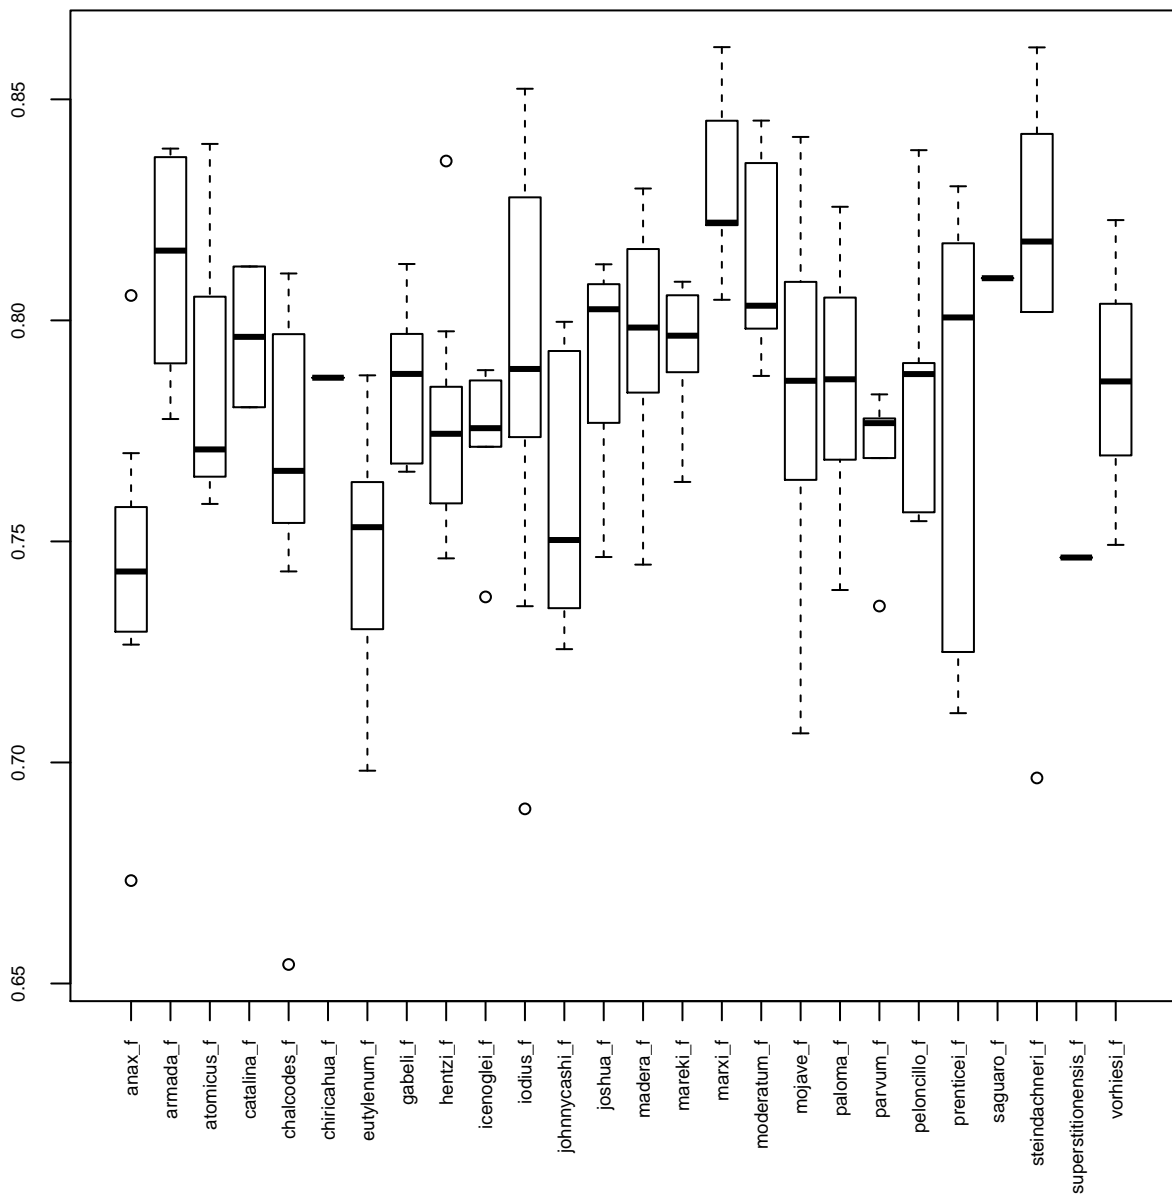

Supplement: Supplementary file 347

## Carapace Length/Femur 1 ratio – males

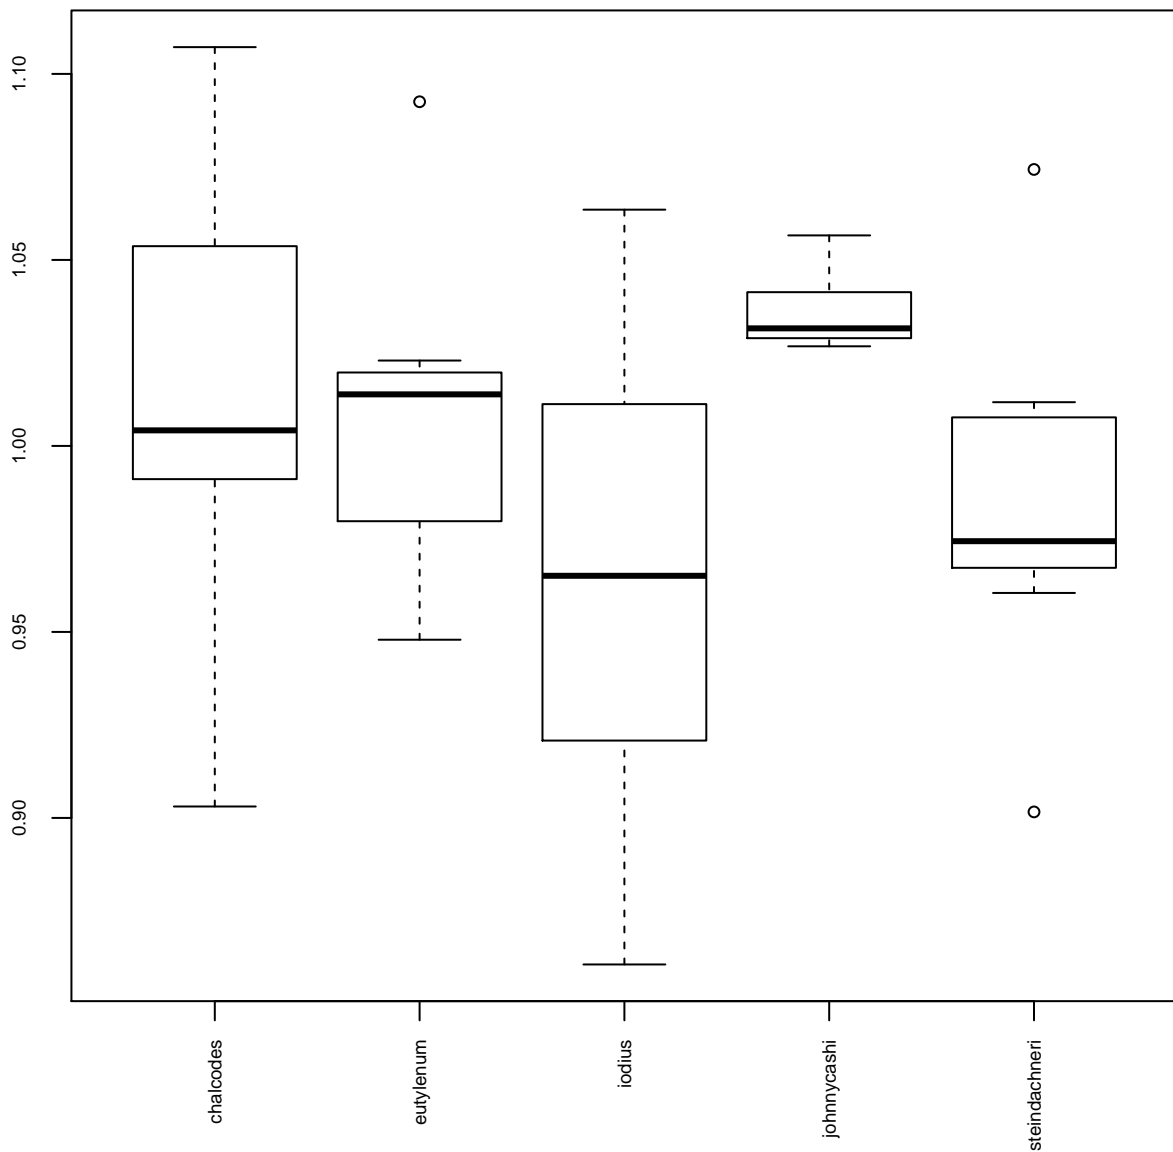

Supplement: Supplementary file 348

# Palpal Tibia/Femur 4 Length ratio – males

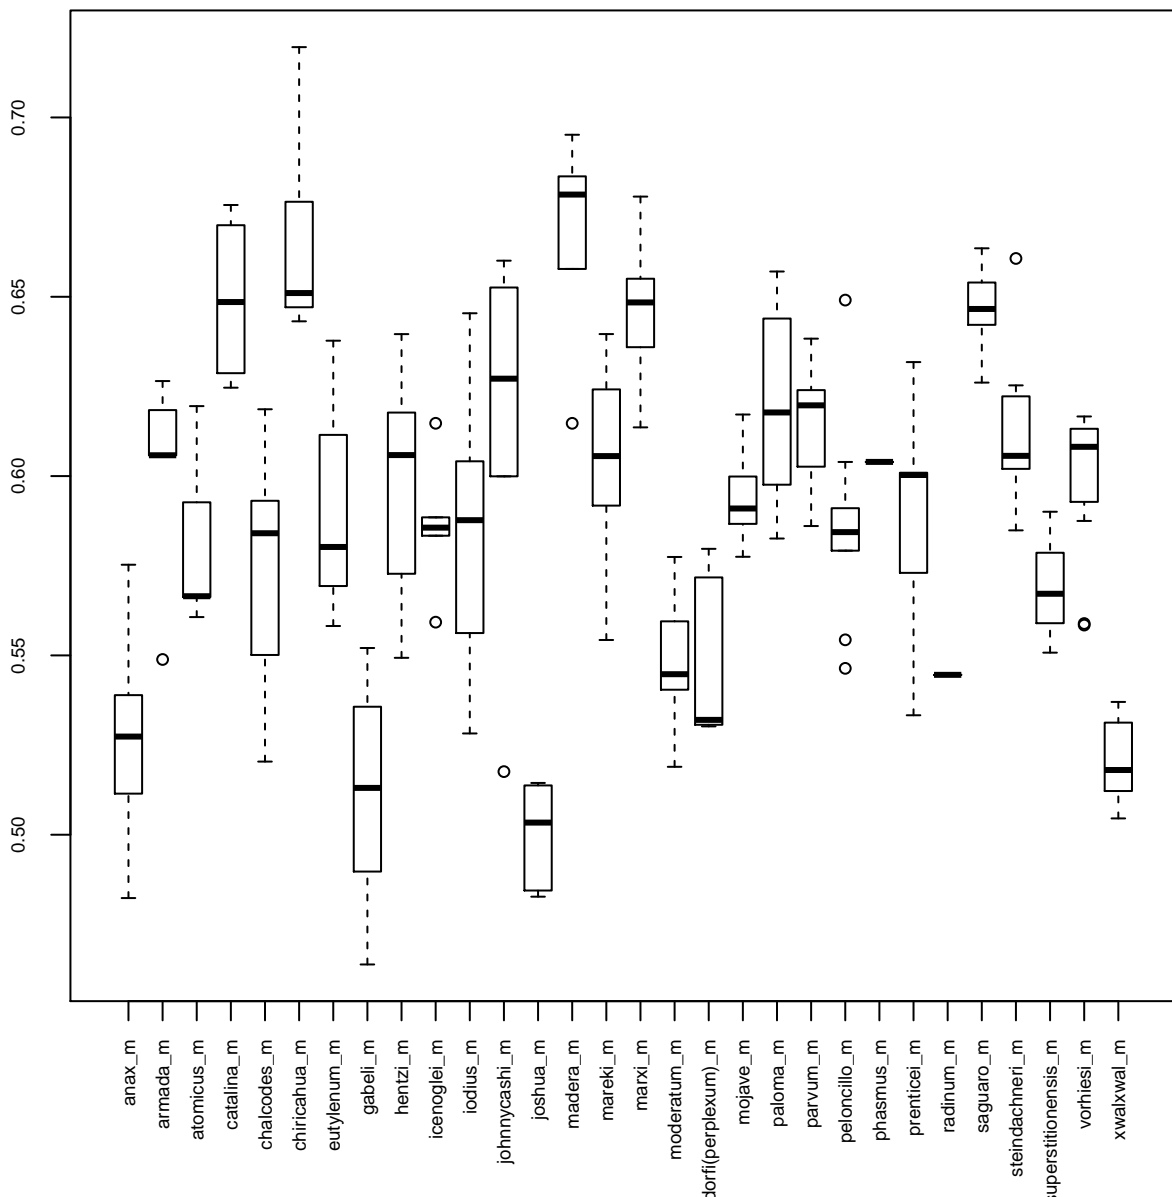

Supplement: Supplementary file 349

## Tibia 3/Metatarsus 4 Length ratio – females

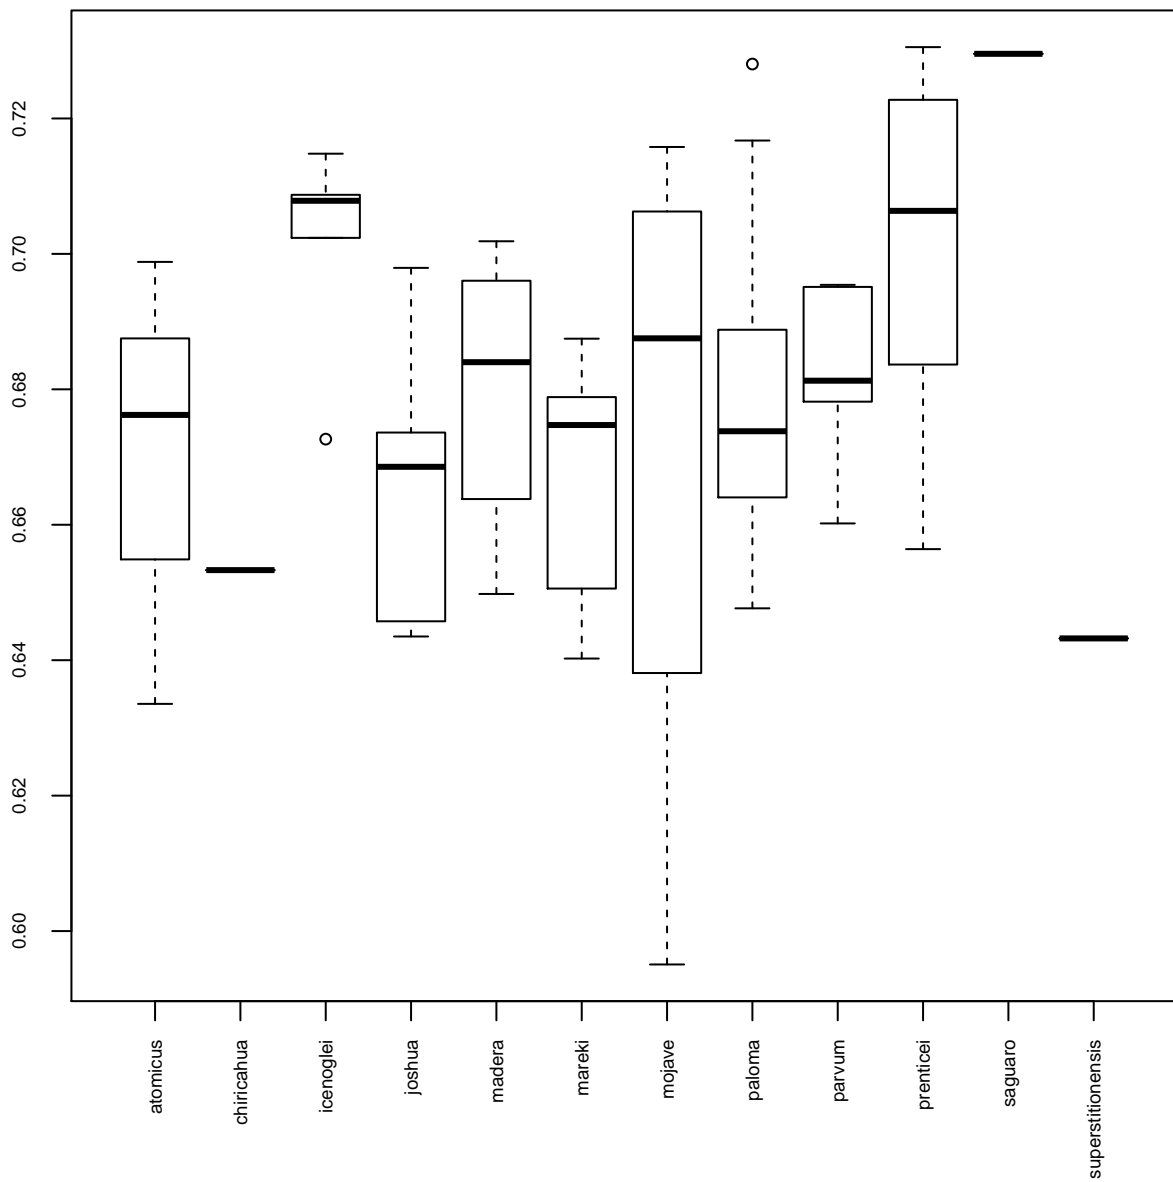

Supplement: Supplementary file 350

# Femur 1/Metatarsus 1 ratio – males

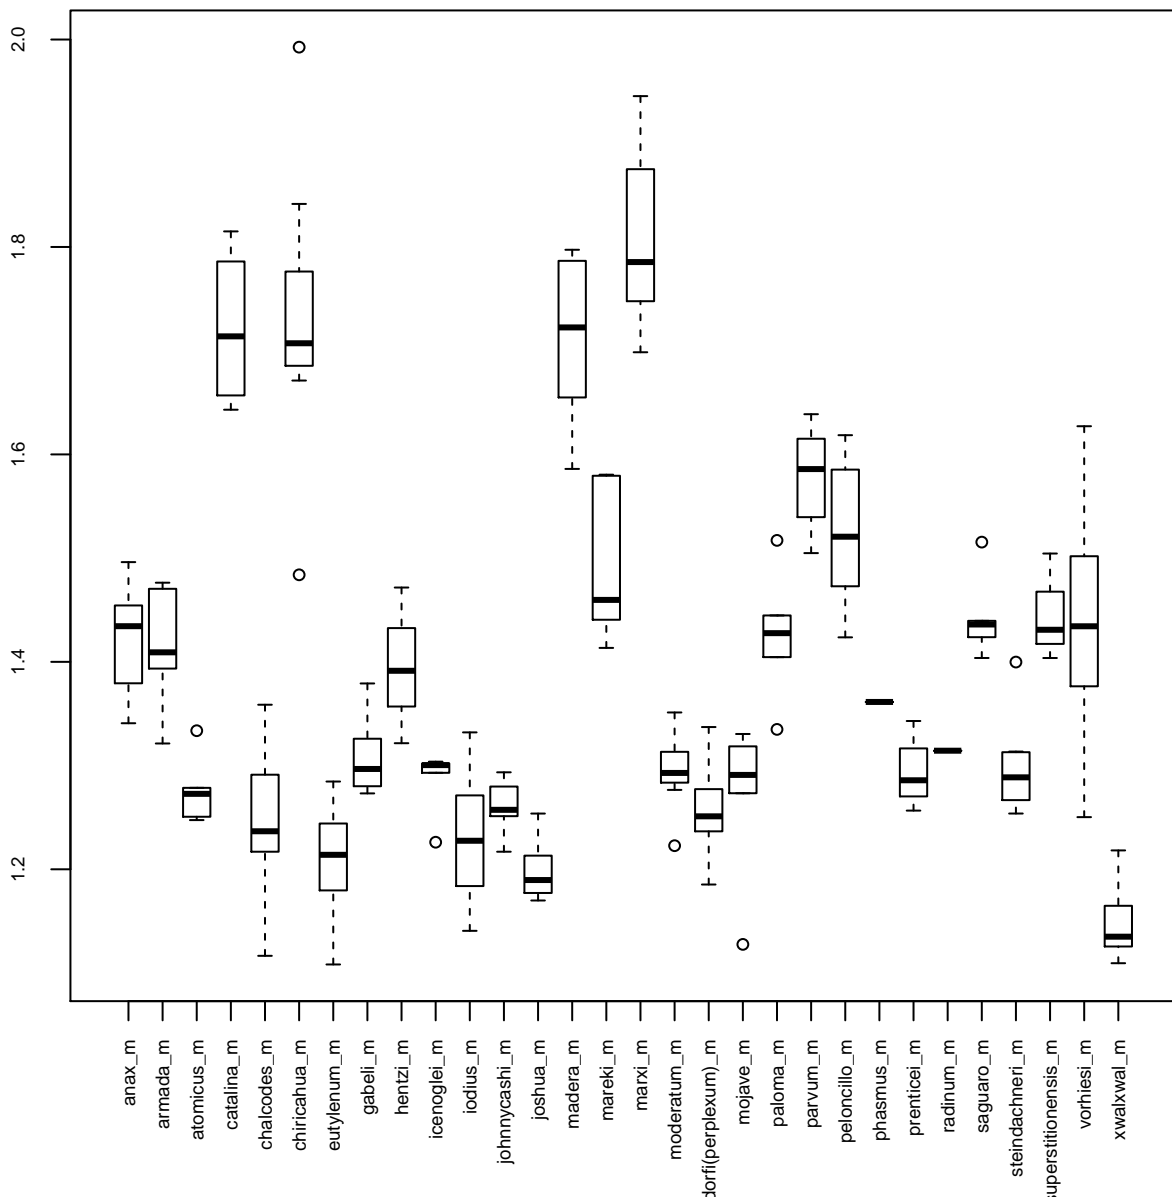

Supplement: Supplementary file 351

## Carapace Length/Femur 3 ratio – females

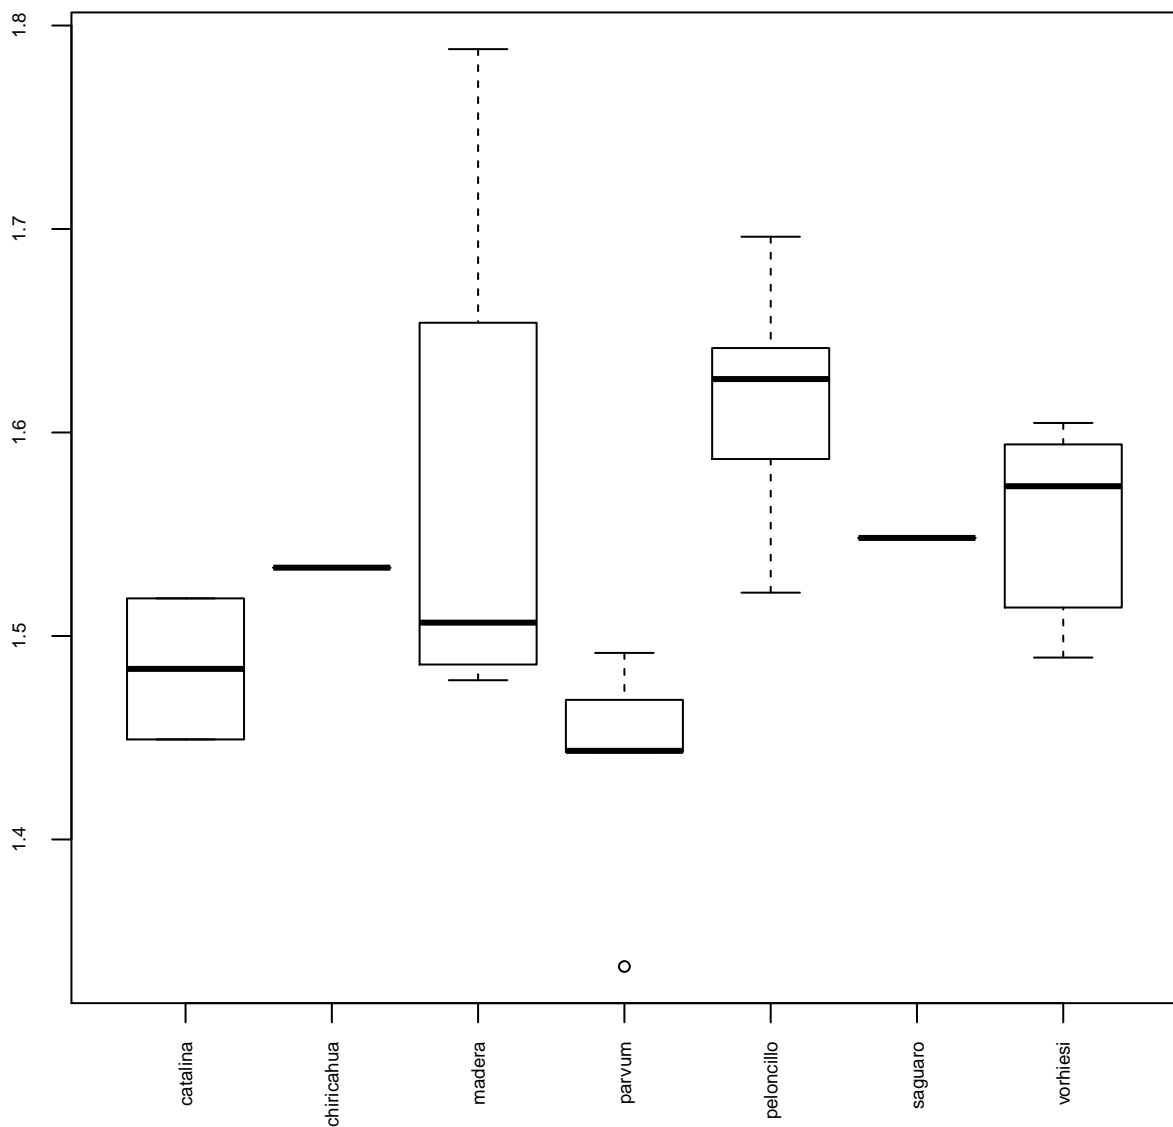

Supplement: Supplementary file 352

## Tibia 1/Tibia 4 ratio – males

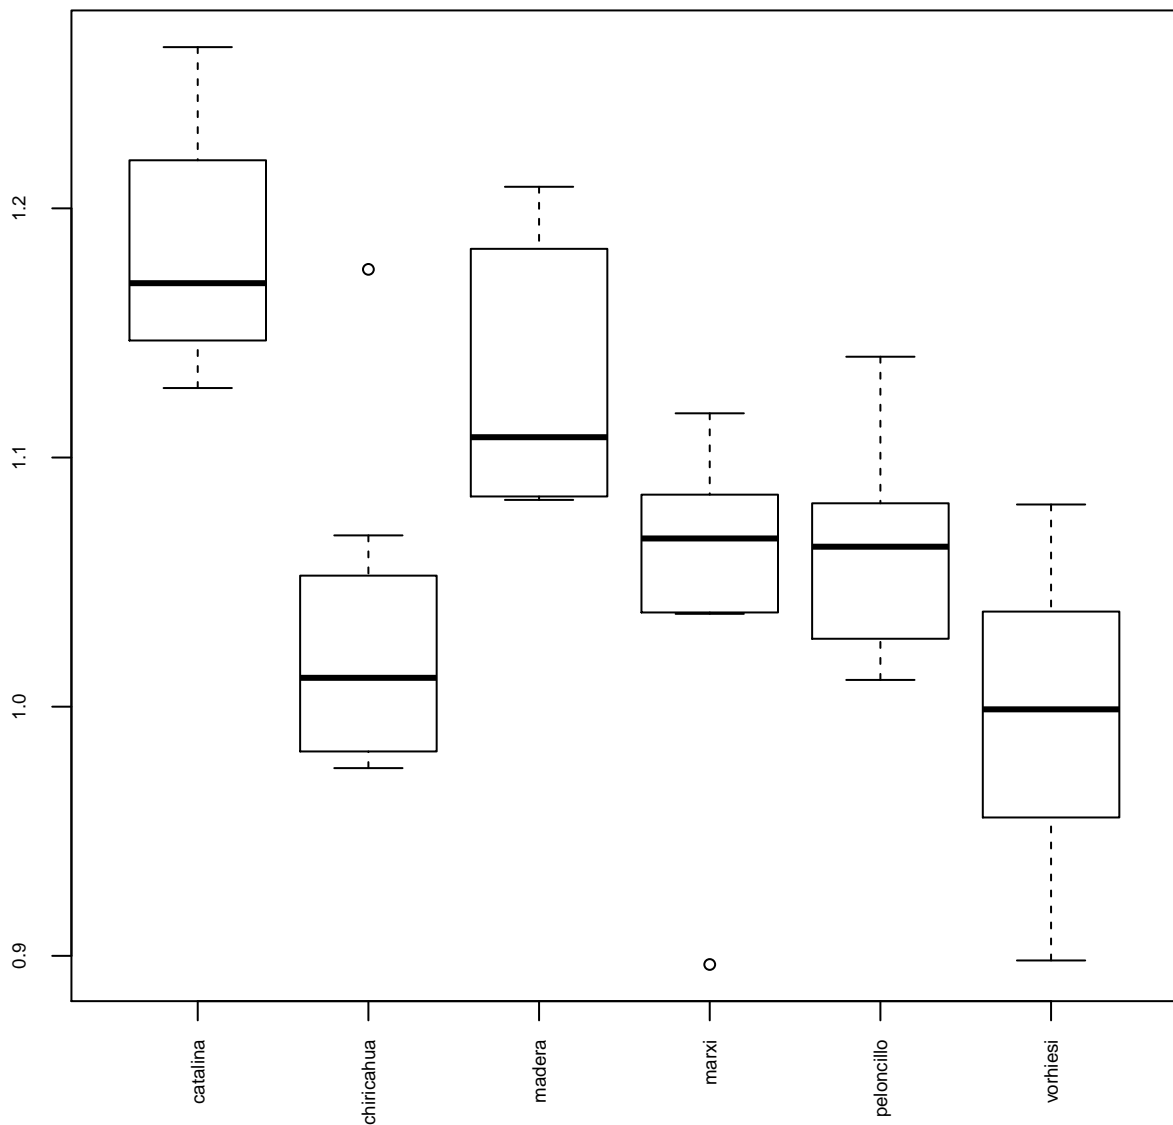

Supplement: Supplementary file 353

## Tibia 1/Tarsus 3 Length ratio – females

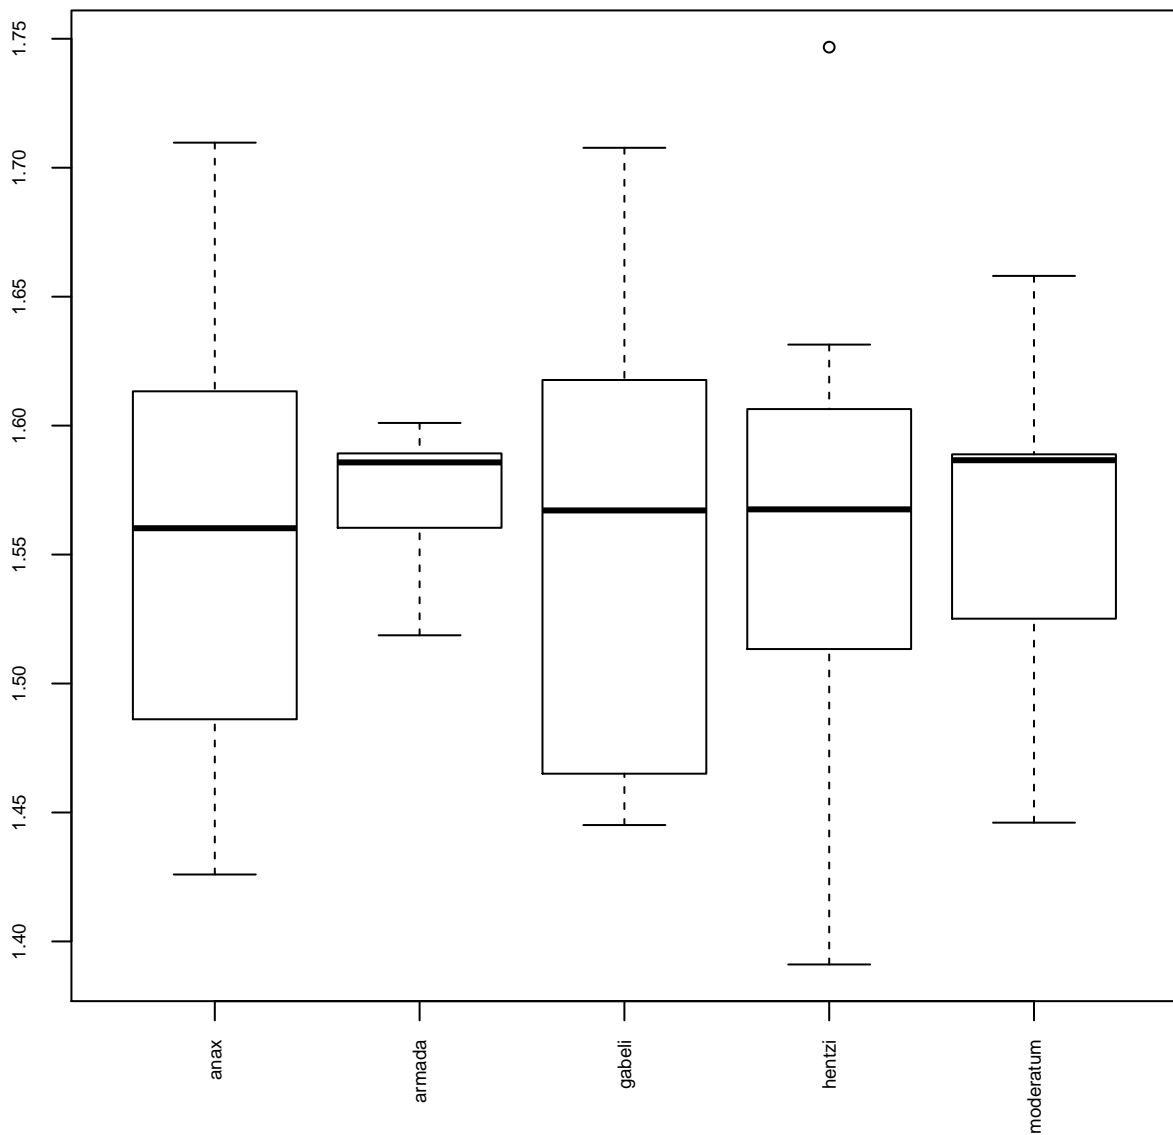

Supplement: Supplementary file 354

# Leg 3 Length/Carapace Length ratio – males

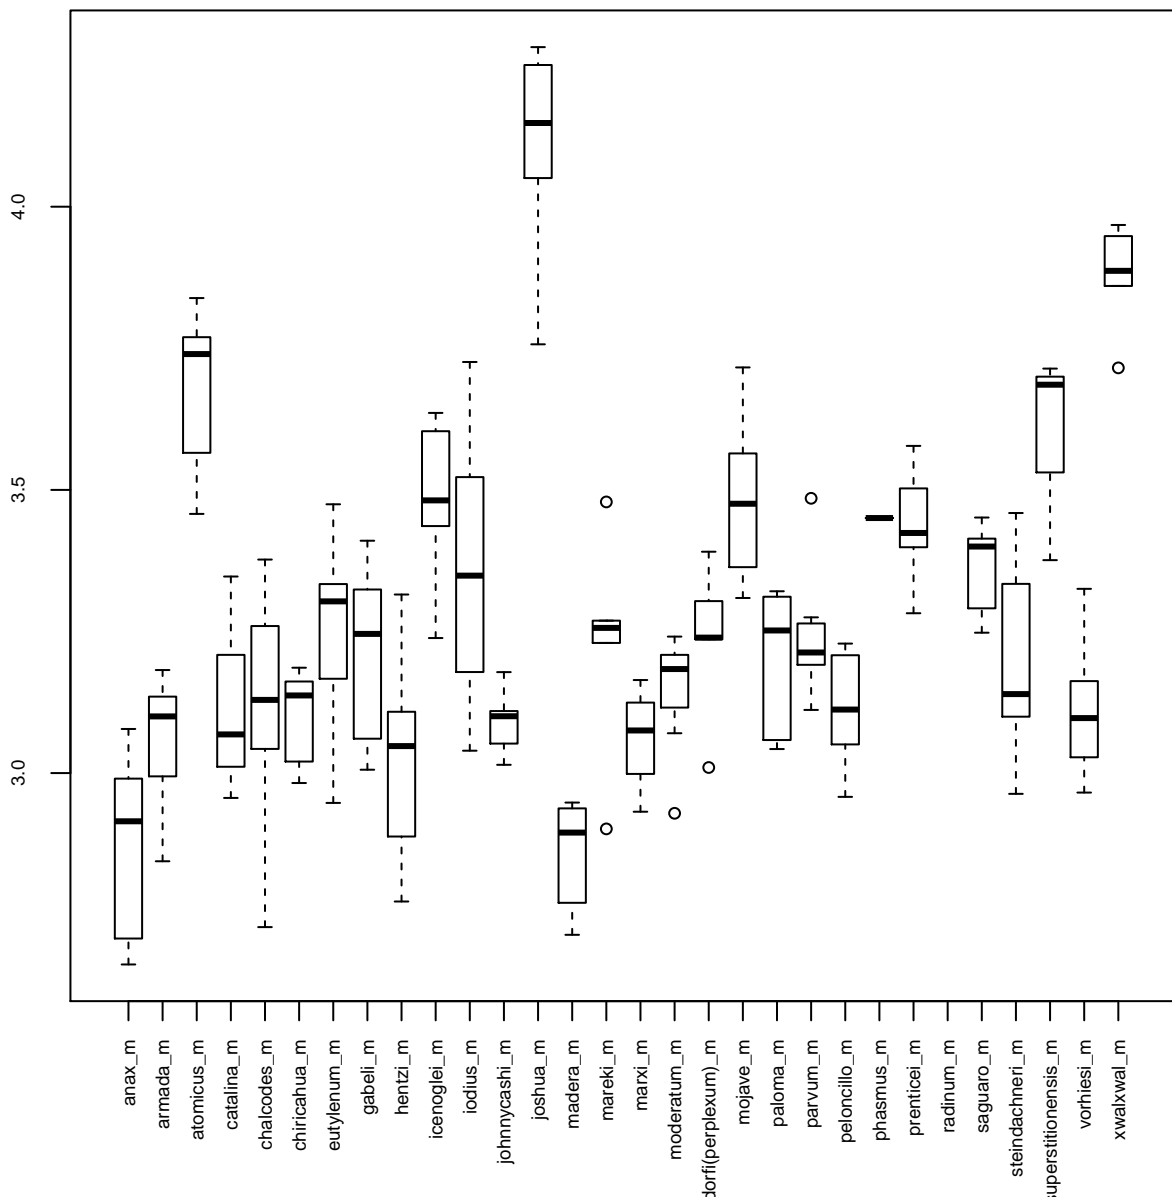

Supplement: Supplementary file 355

# Metatarsus 1/Tibia 4 Length ratio – females

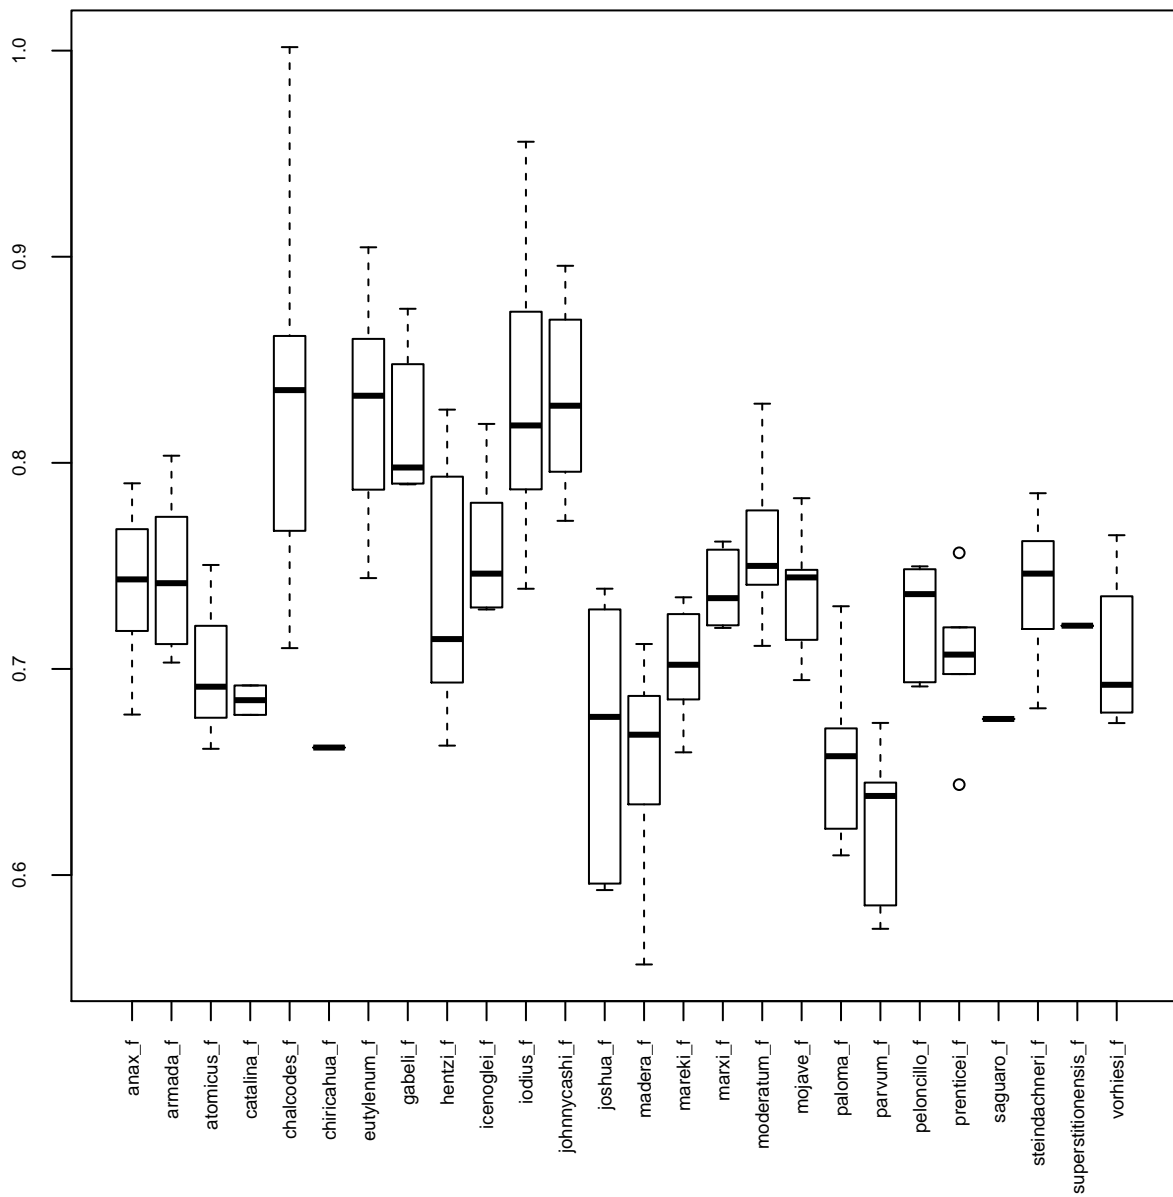

Supplement: Supplementary file 356

## Femur 1/Tarsus 4 ratio – males

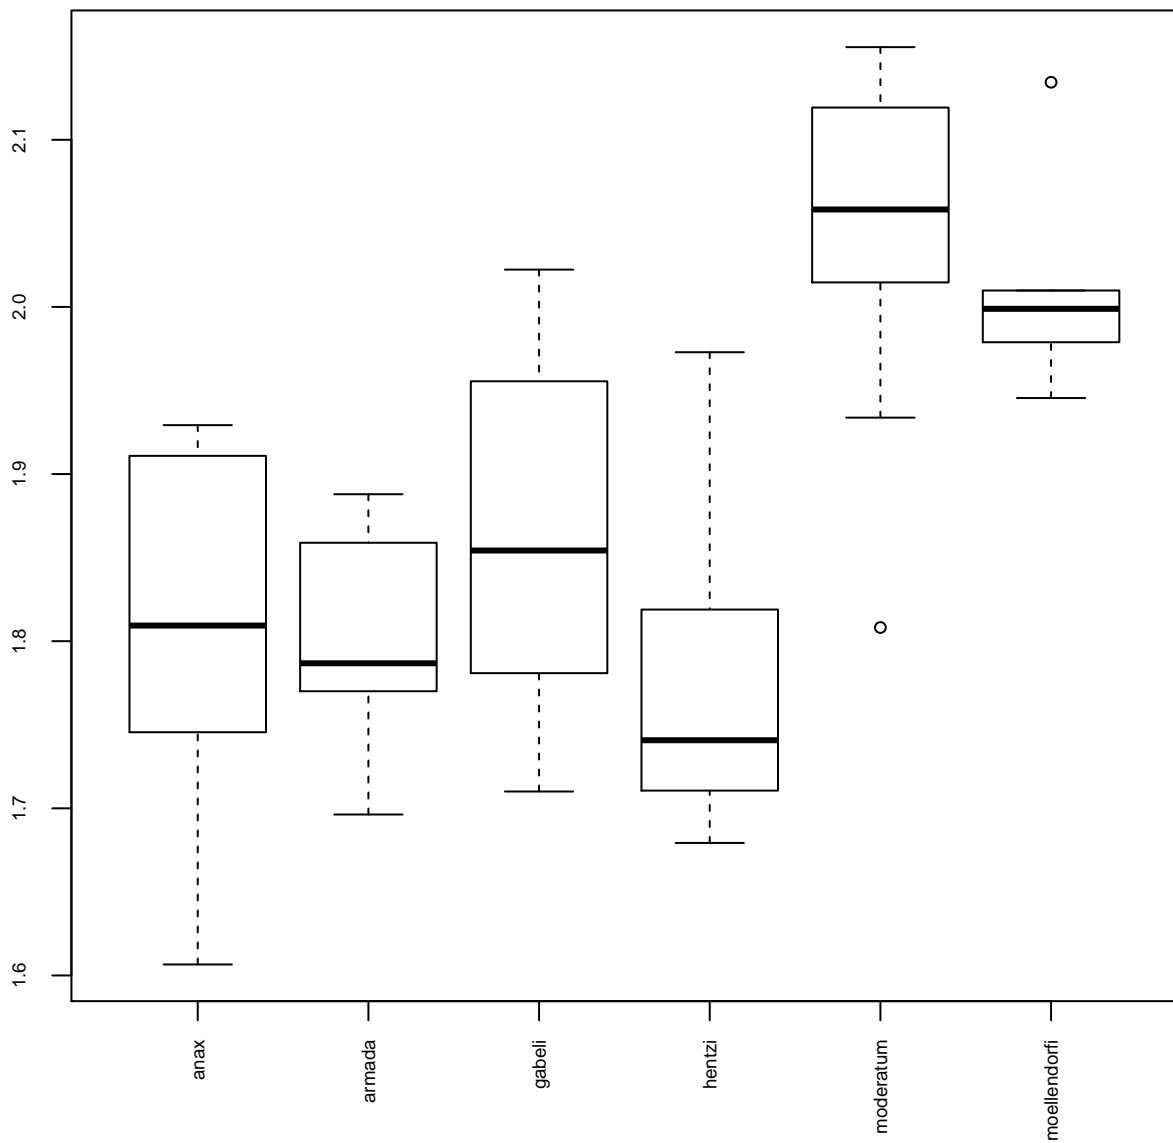

Supplement: Supplementary file 357

## Femur 3/Patella 3 ratio – females

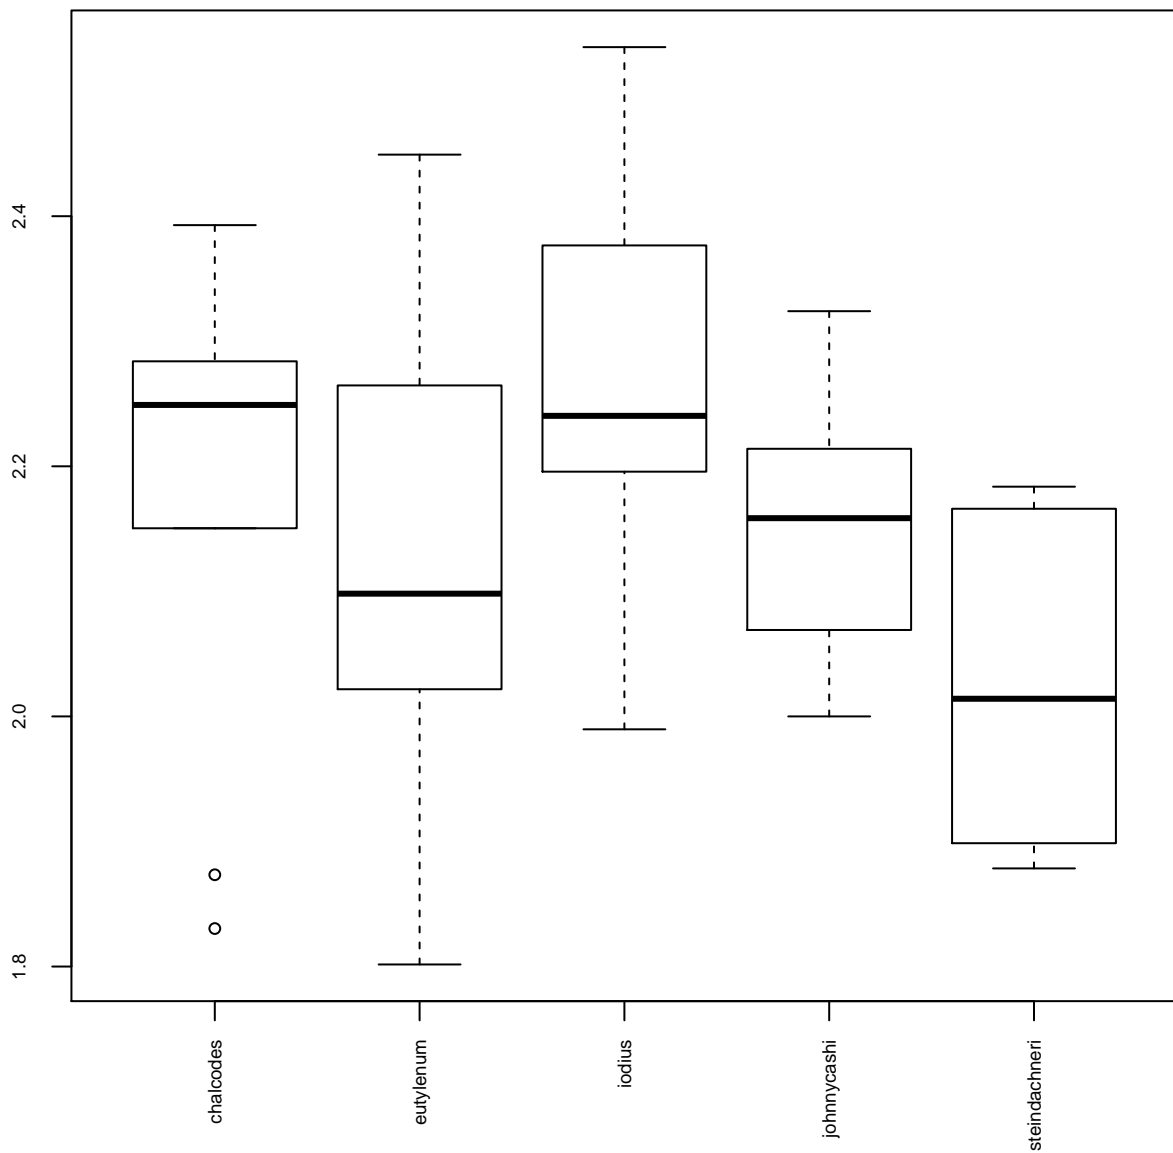

Supplement: Supplementary file 358

# Tibia 1/Tarsus 1 ratio – females

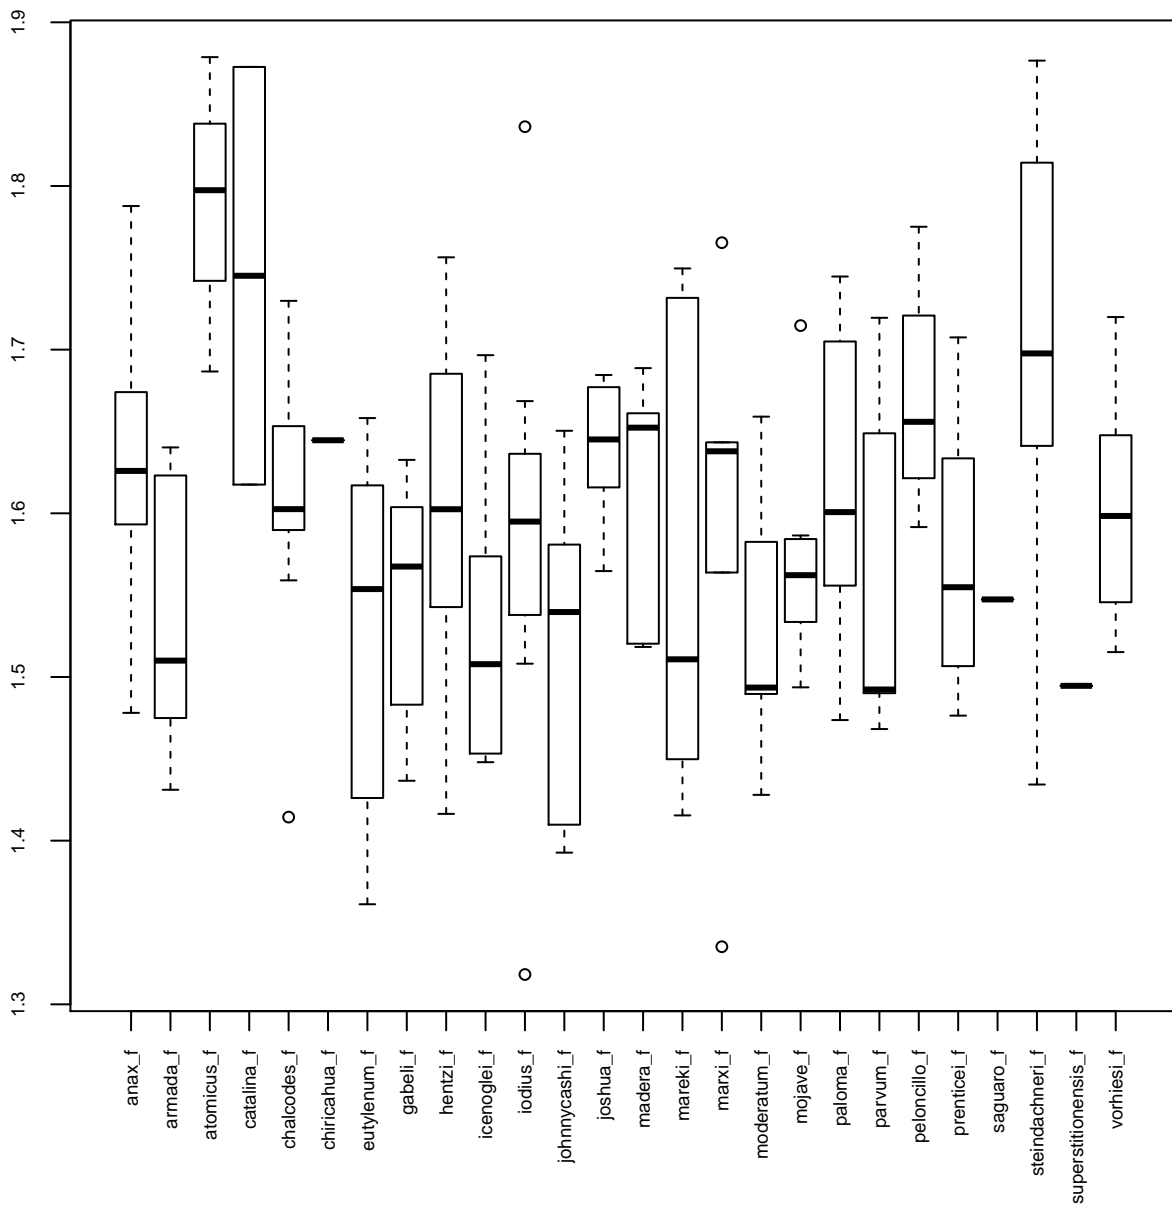

Supplement: Supplementary file 359

### Femur 1/Tibia 1 ratio – males

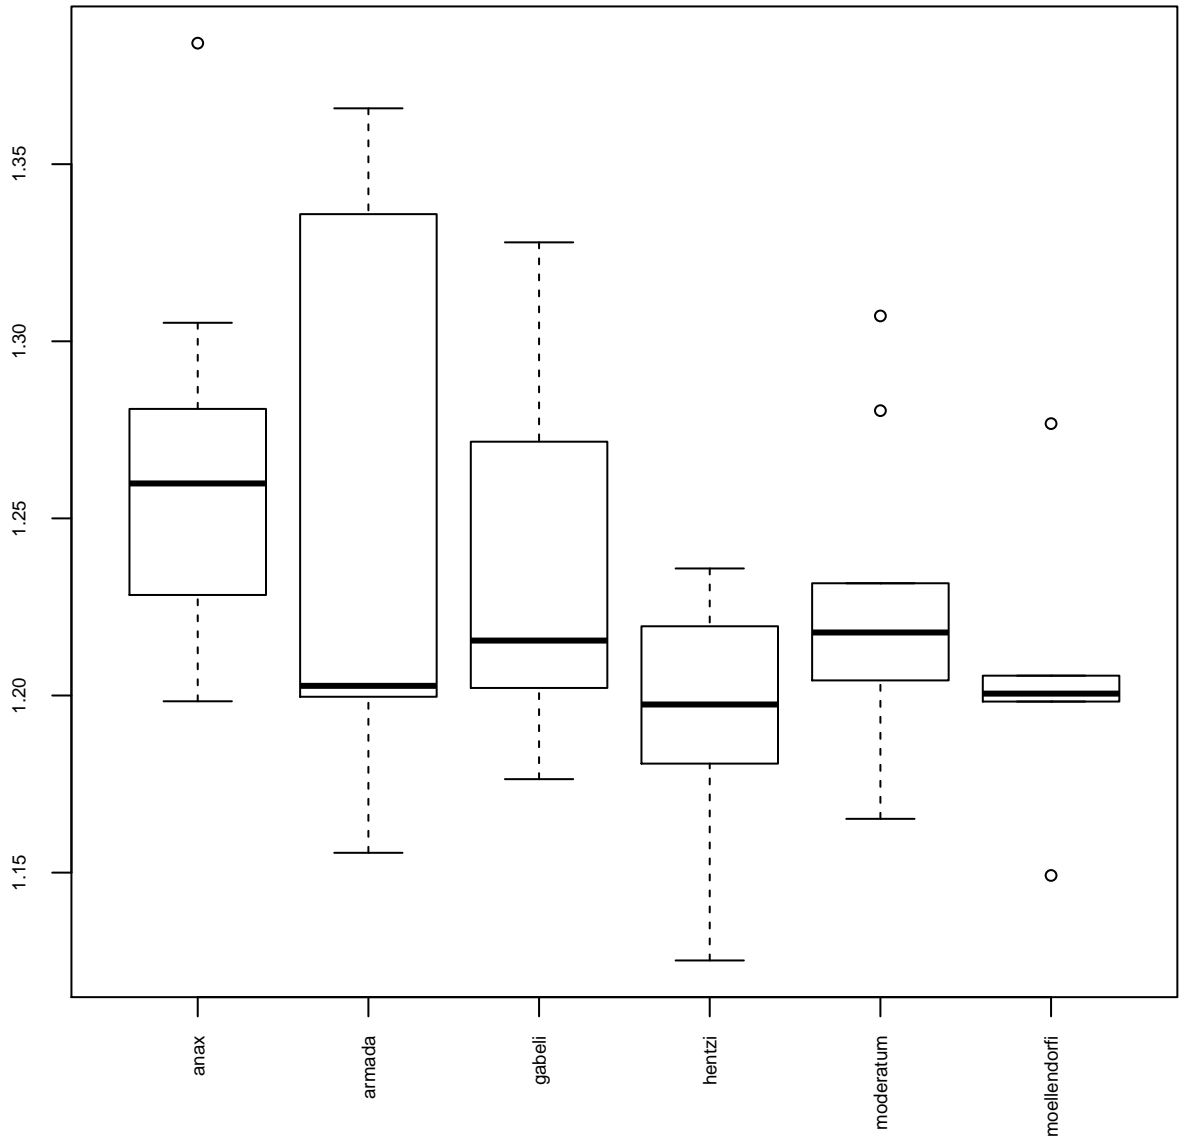

Supplement: Supplementary file 360

# Femur 1/Tarsus 3 ratio – females

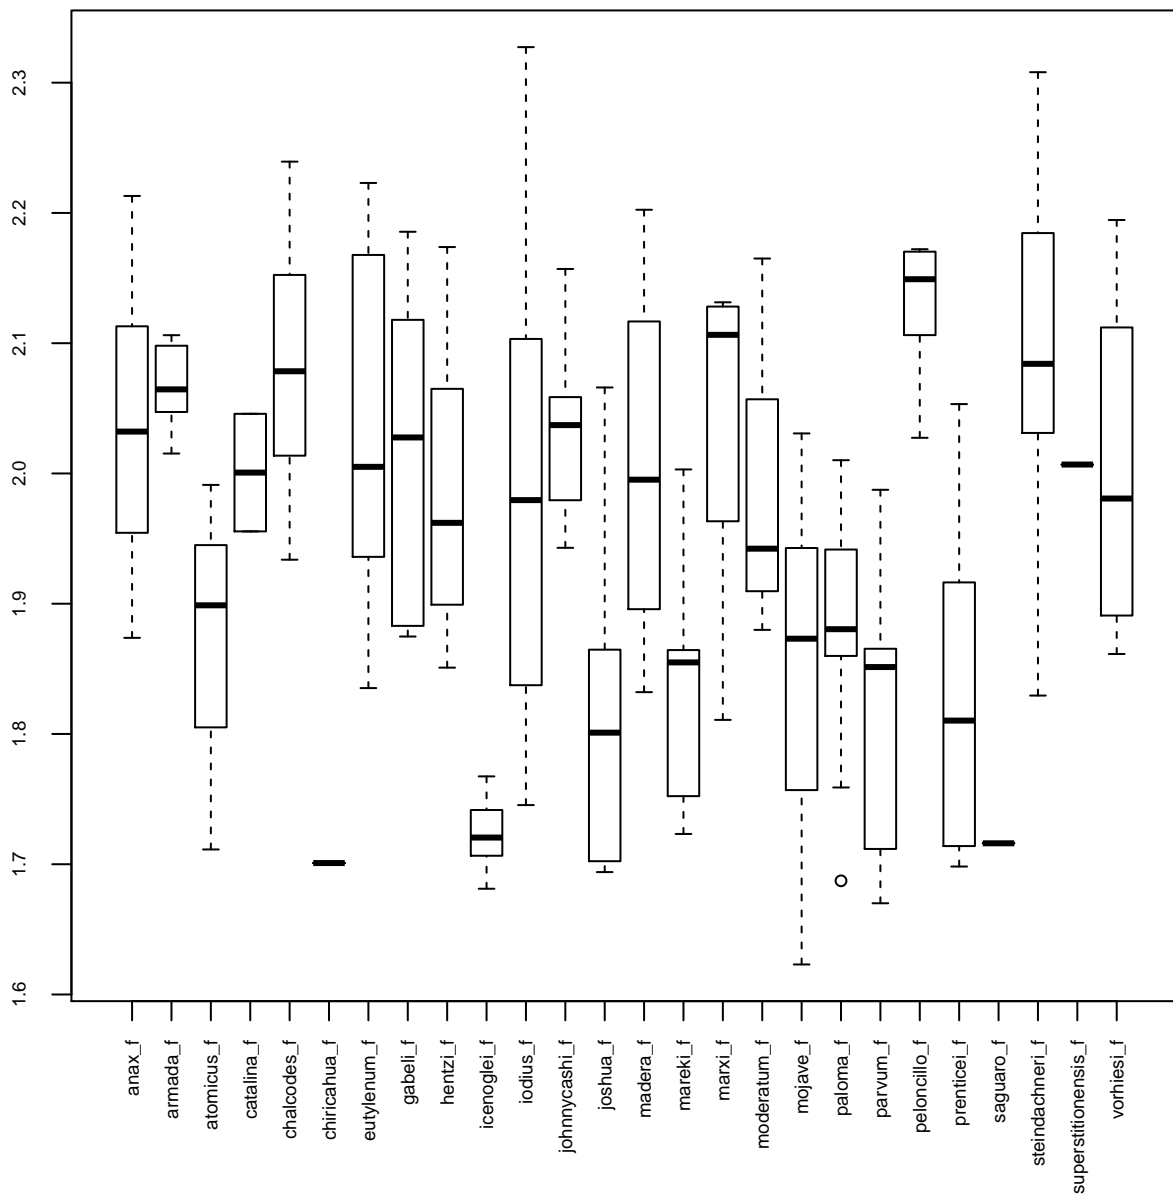

Supplement: Supplementary file 361

## Carapace Length/Femur 3 ratio – males

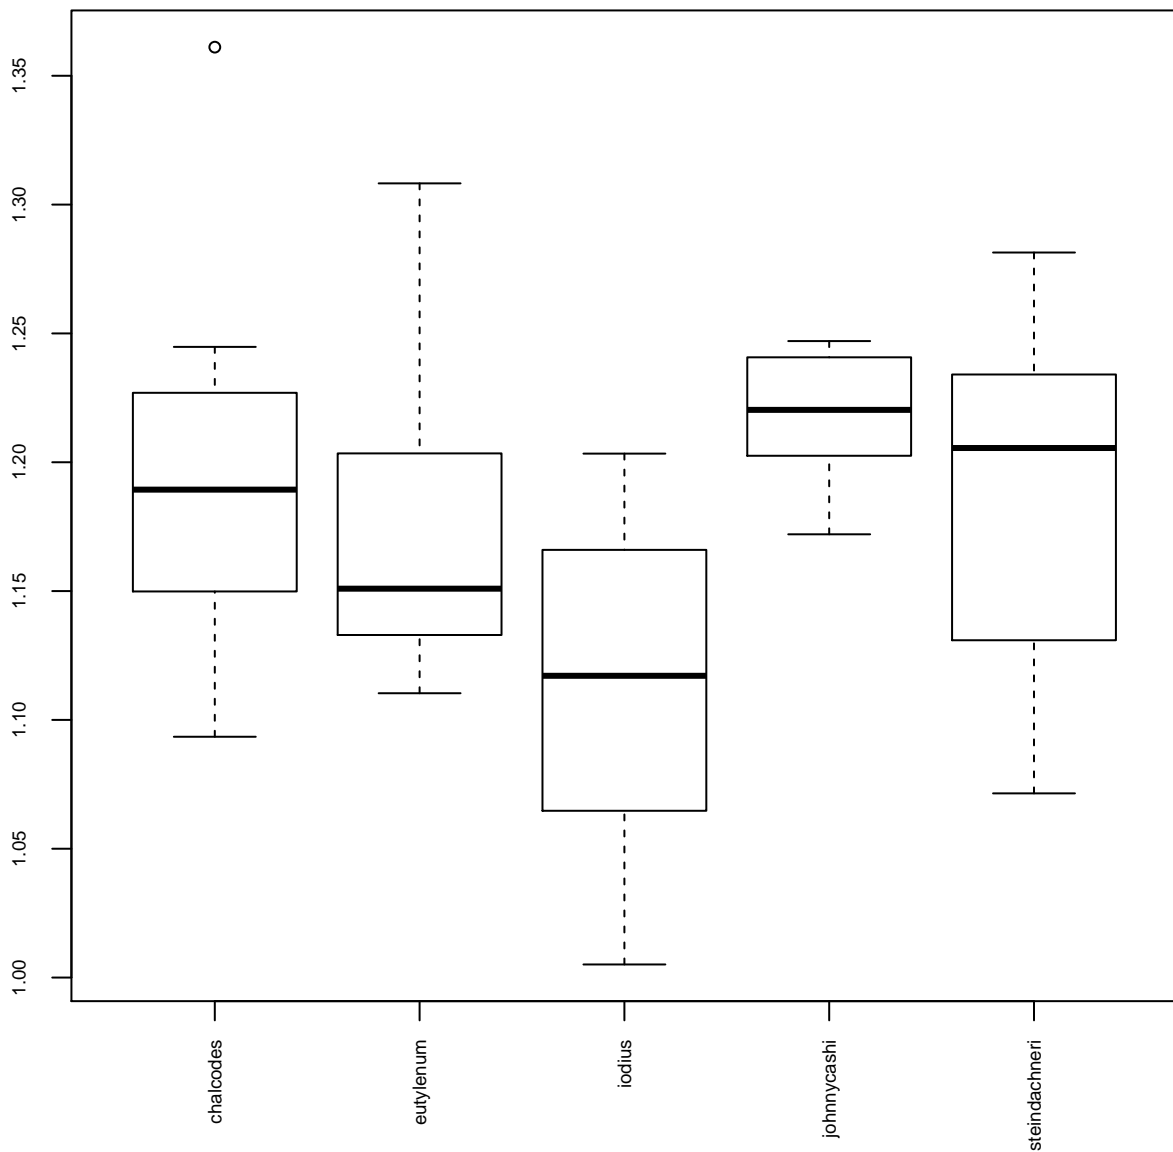

Supplement: Supplementary file 362

# Tarsus 1/Femur 3 Length ratio – females

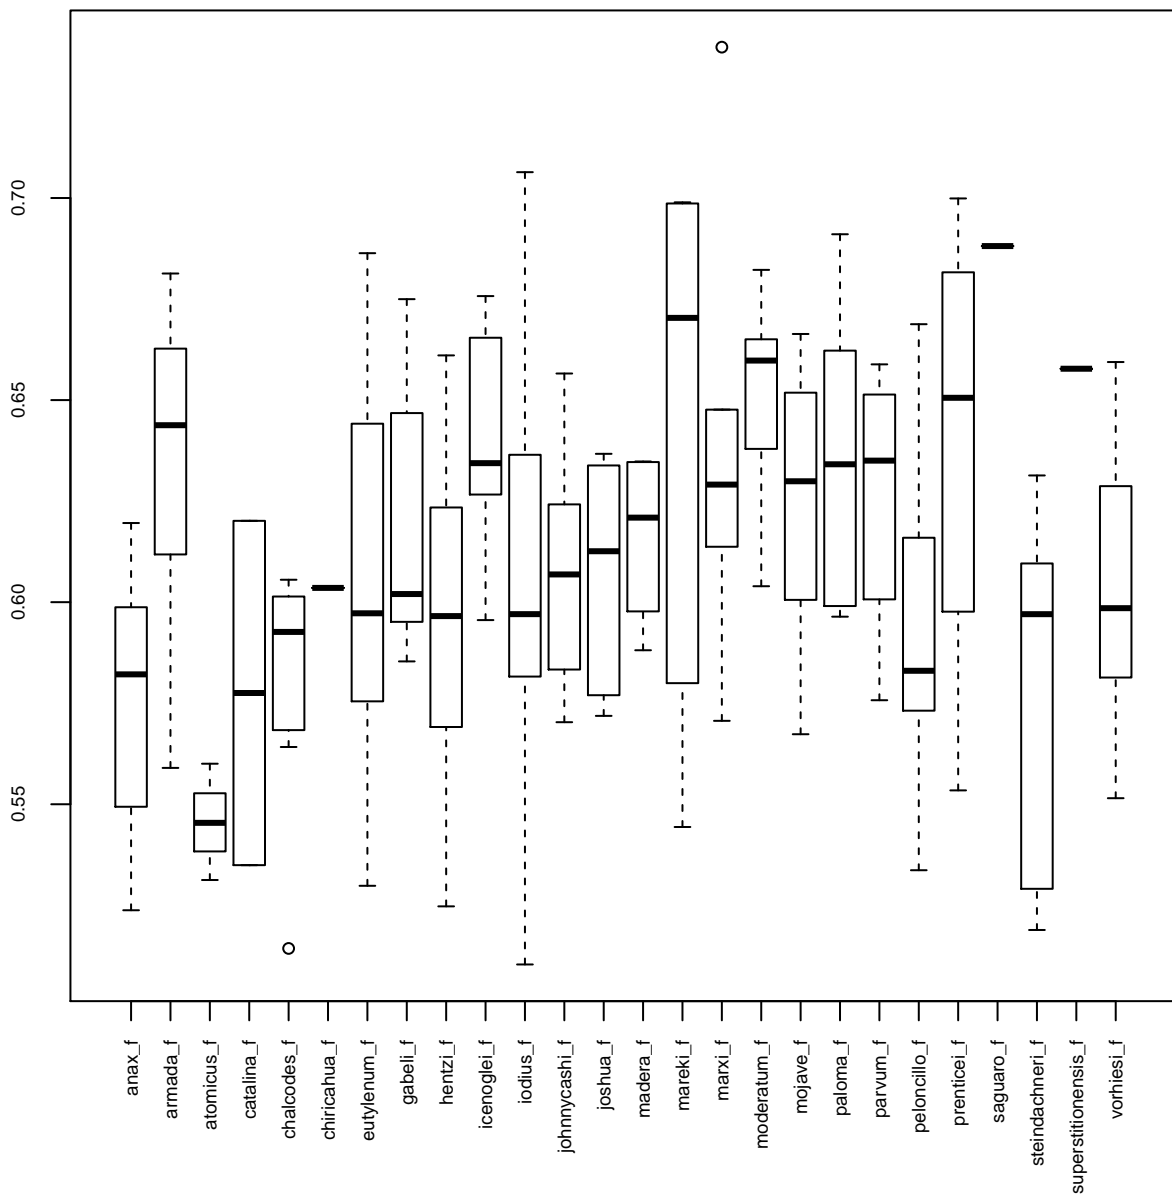

Supplement: Supplementary file 363

## Carapace Length/Palpal Tibia Length ratio – males

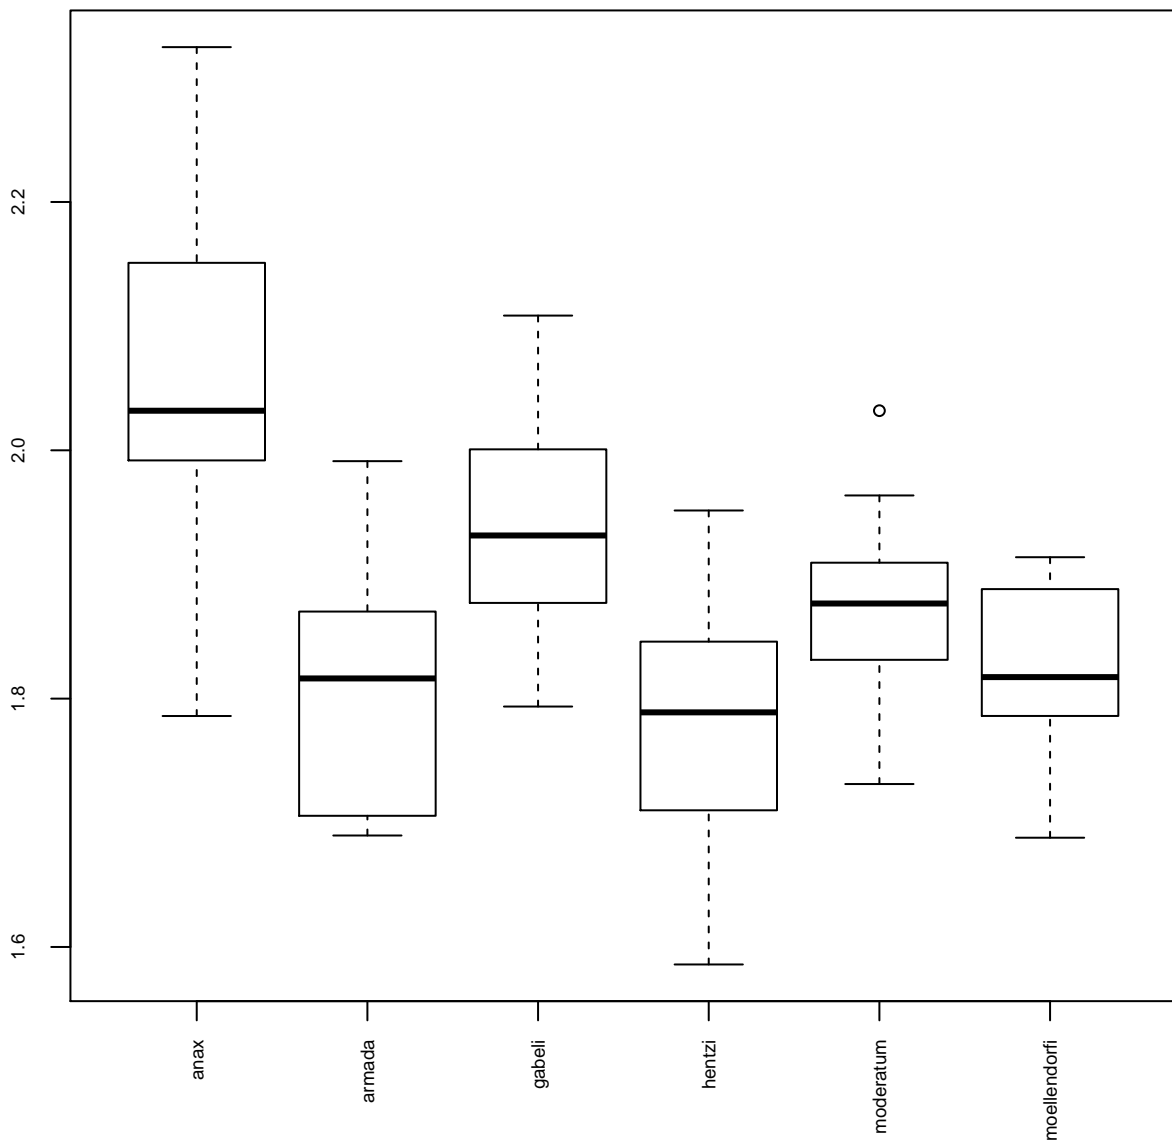

Supplement: Supplementary file 364

## Metatarsus 3/Tarsus 3 ratio – males

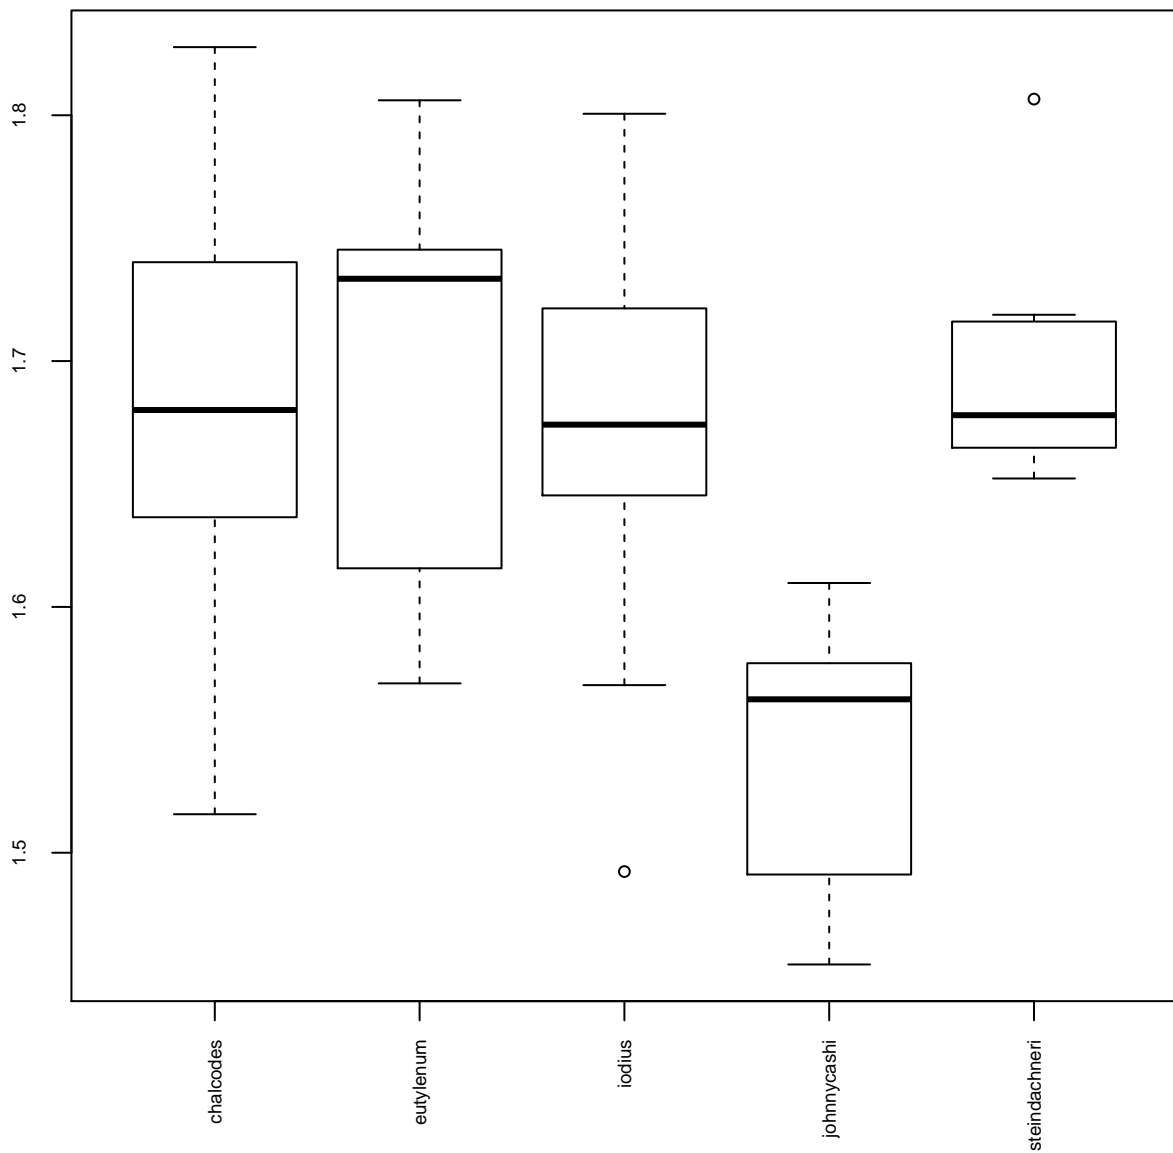

Supplement: Supplementary file 365

## Femur 1/Metatarsus 4 ratio – females

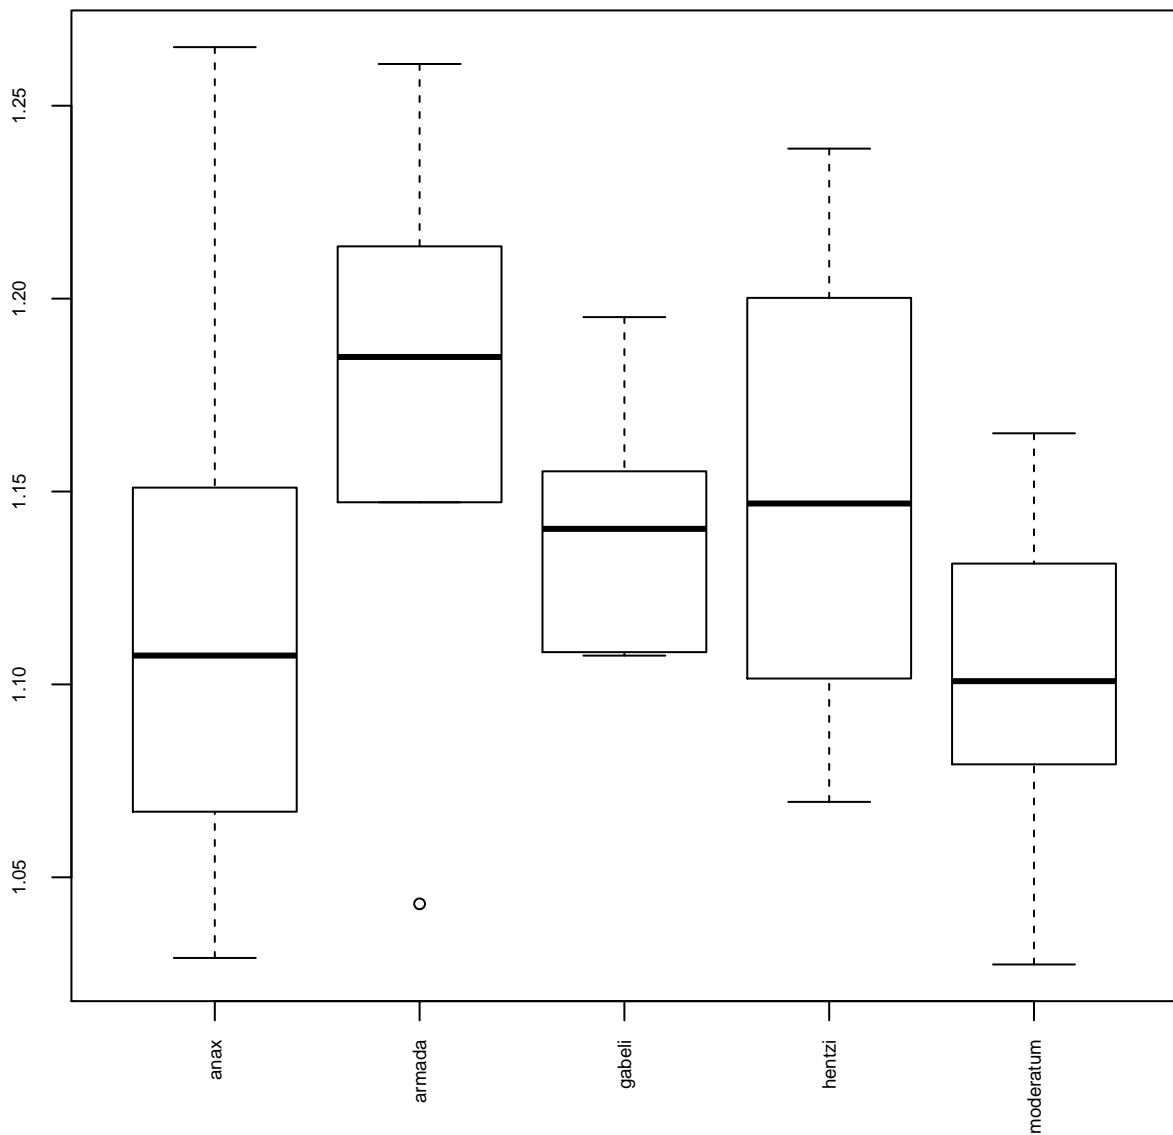

Supplement: Supplementary file 366

## Metatarsus 1/Tarsus 4 Length ratio – males

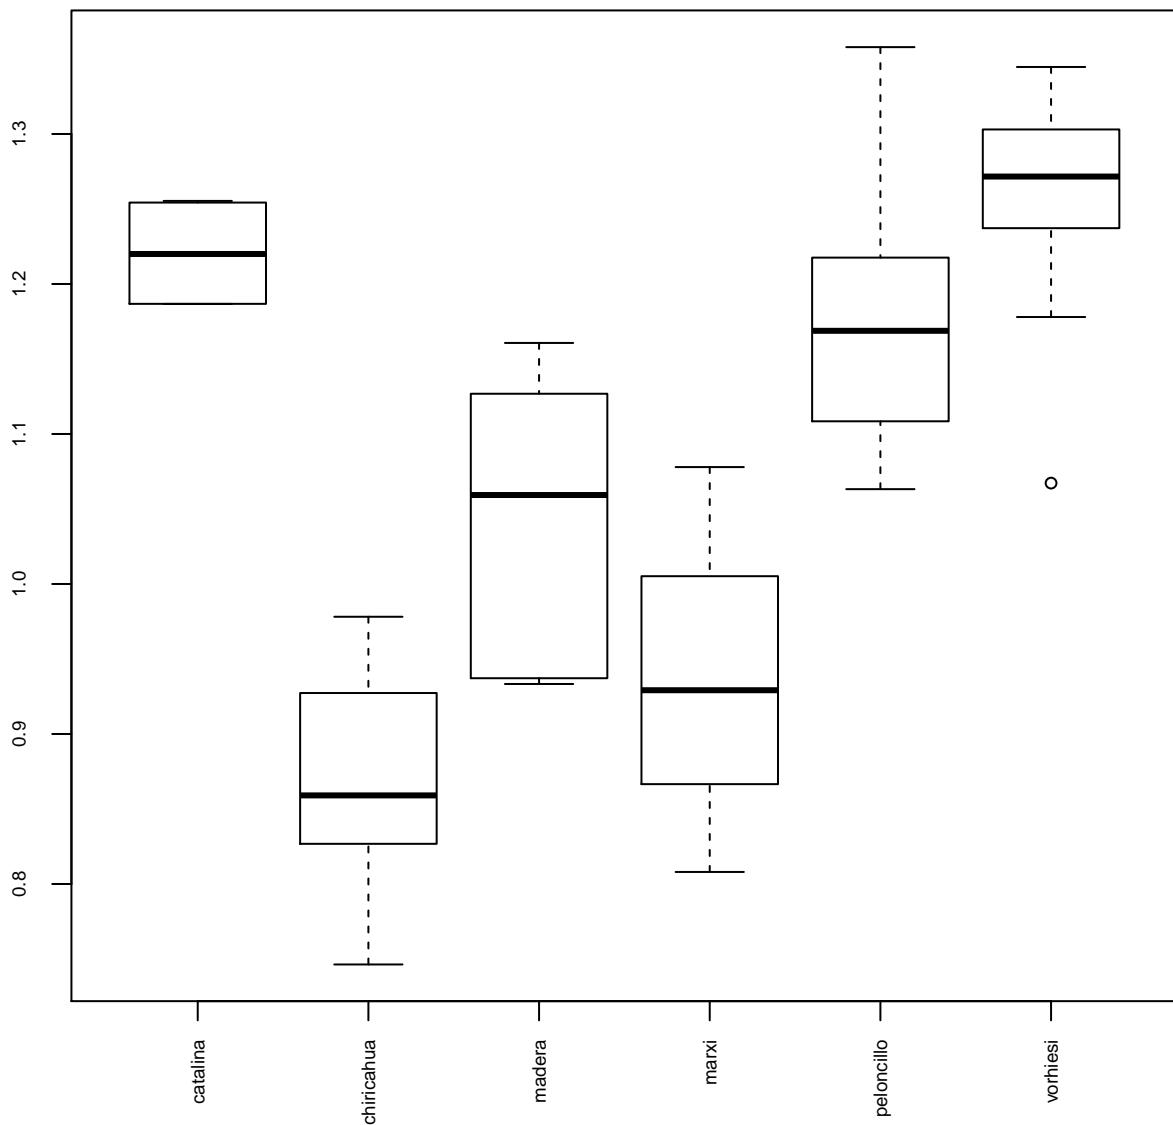

Supplement: Supplementary file 367

# Patella 1/Tibia 4 Length ratio – males

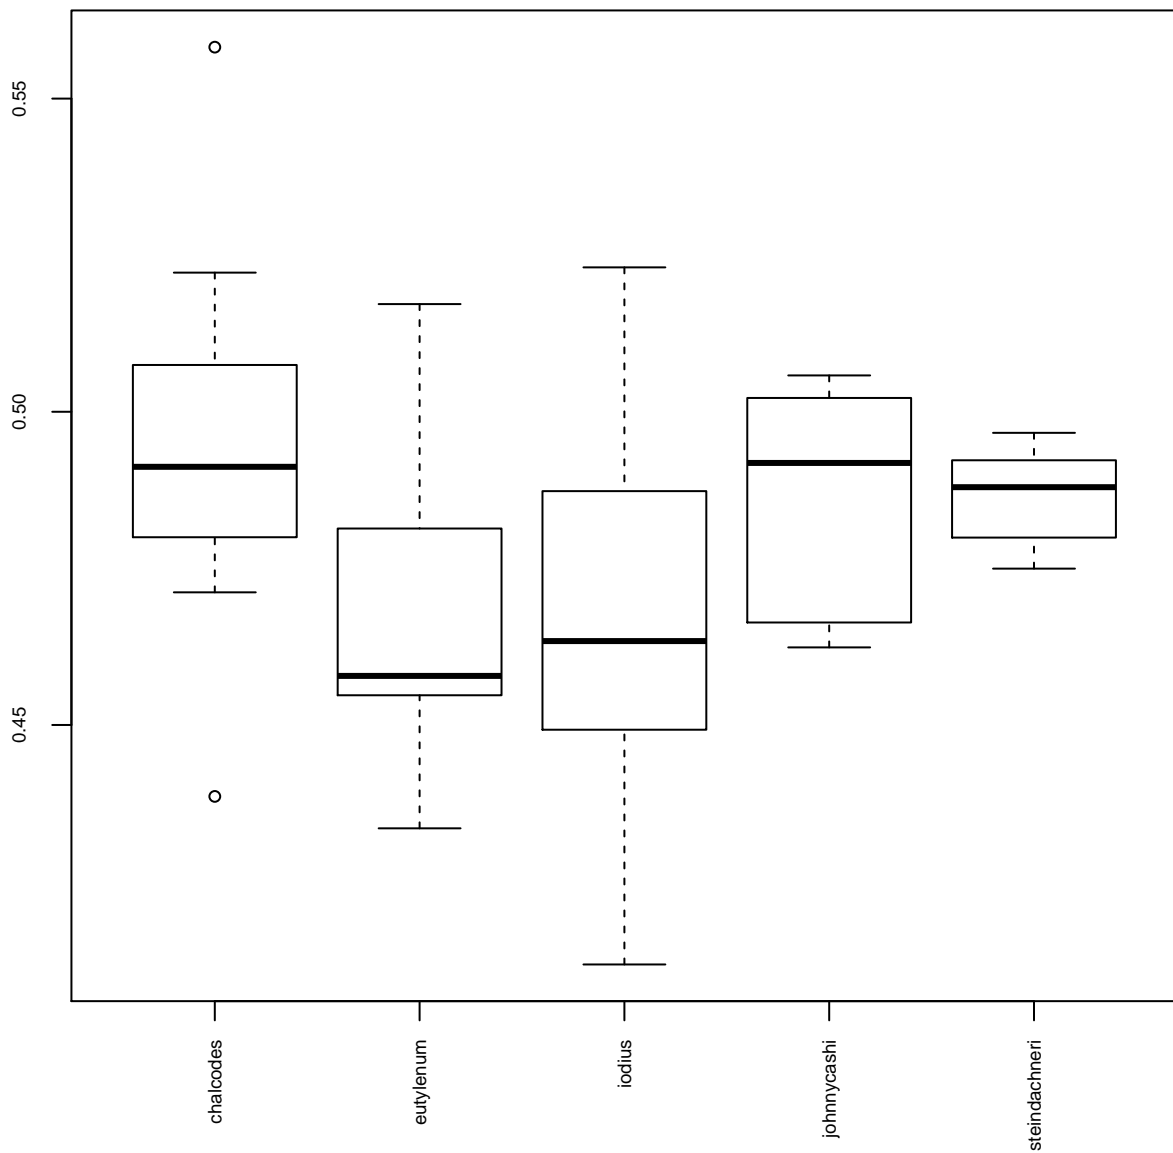

Supplement: Supplementary file 368

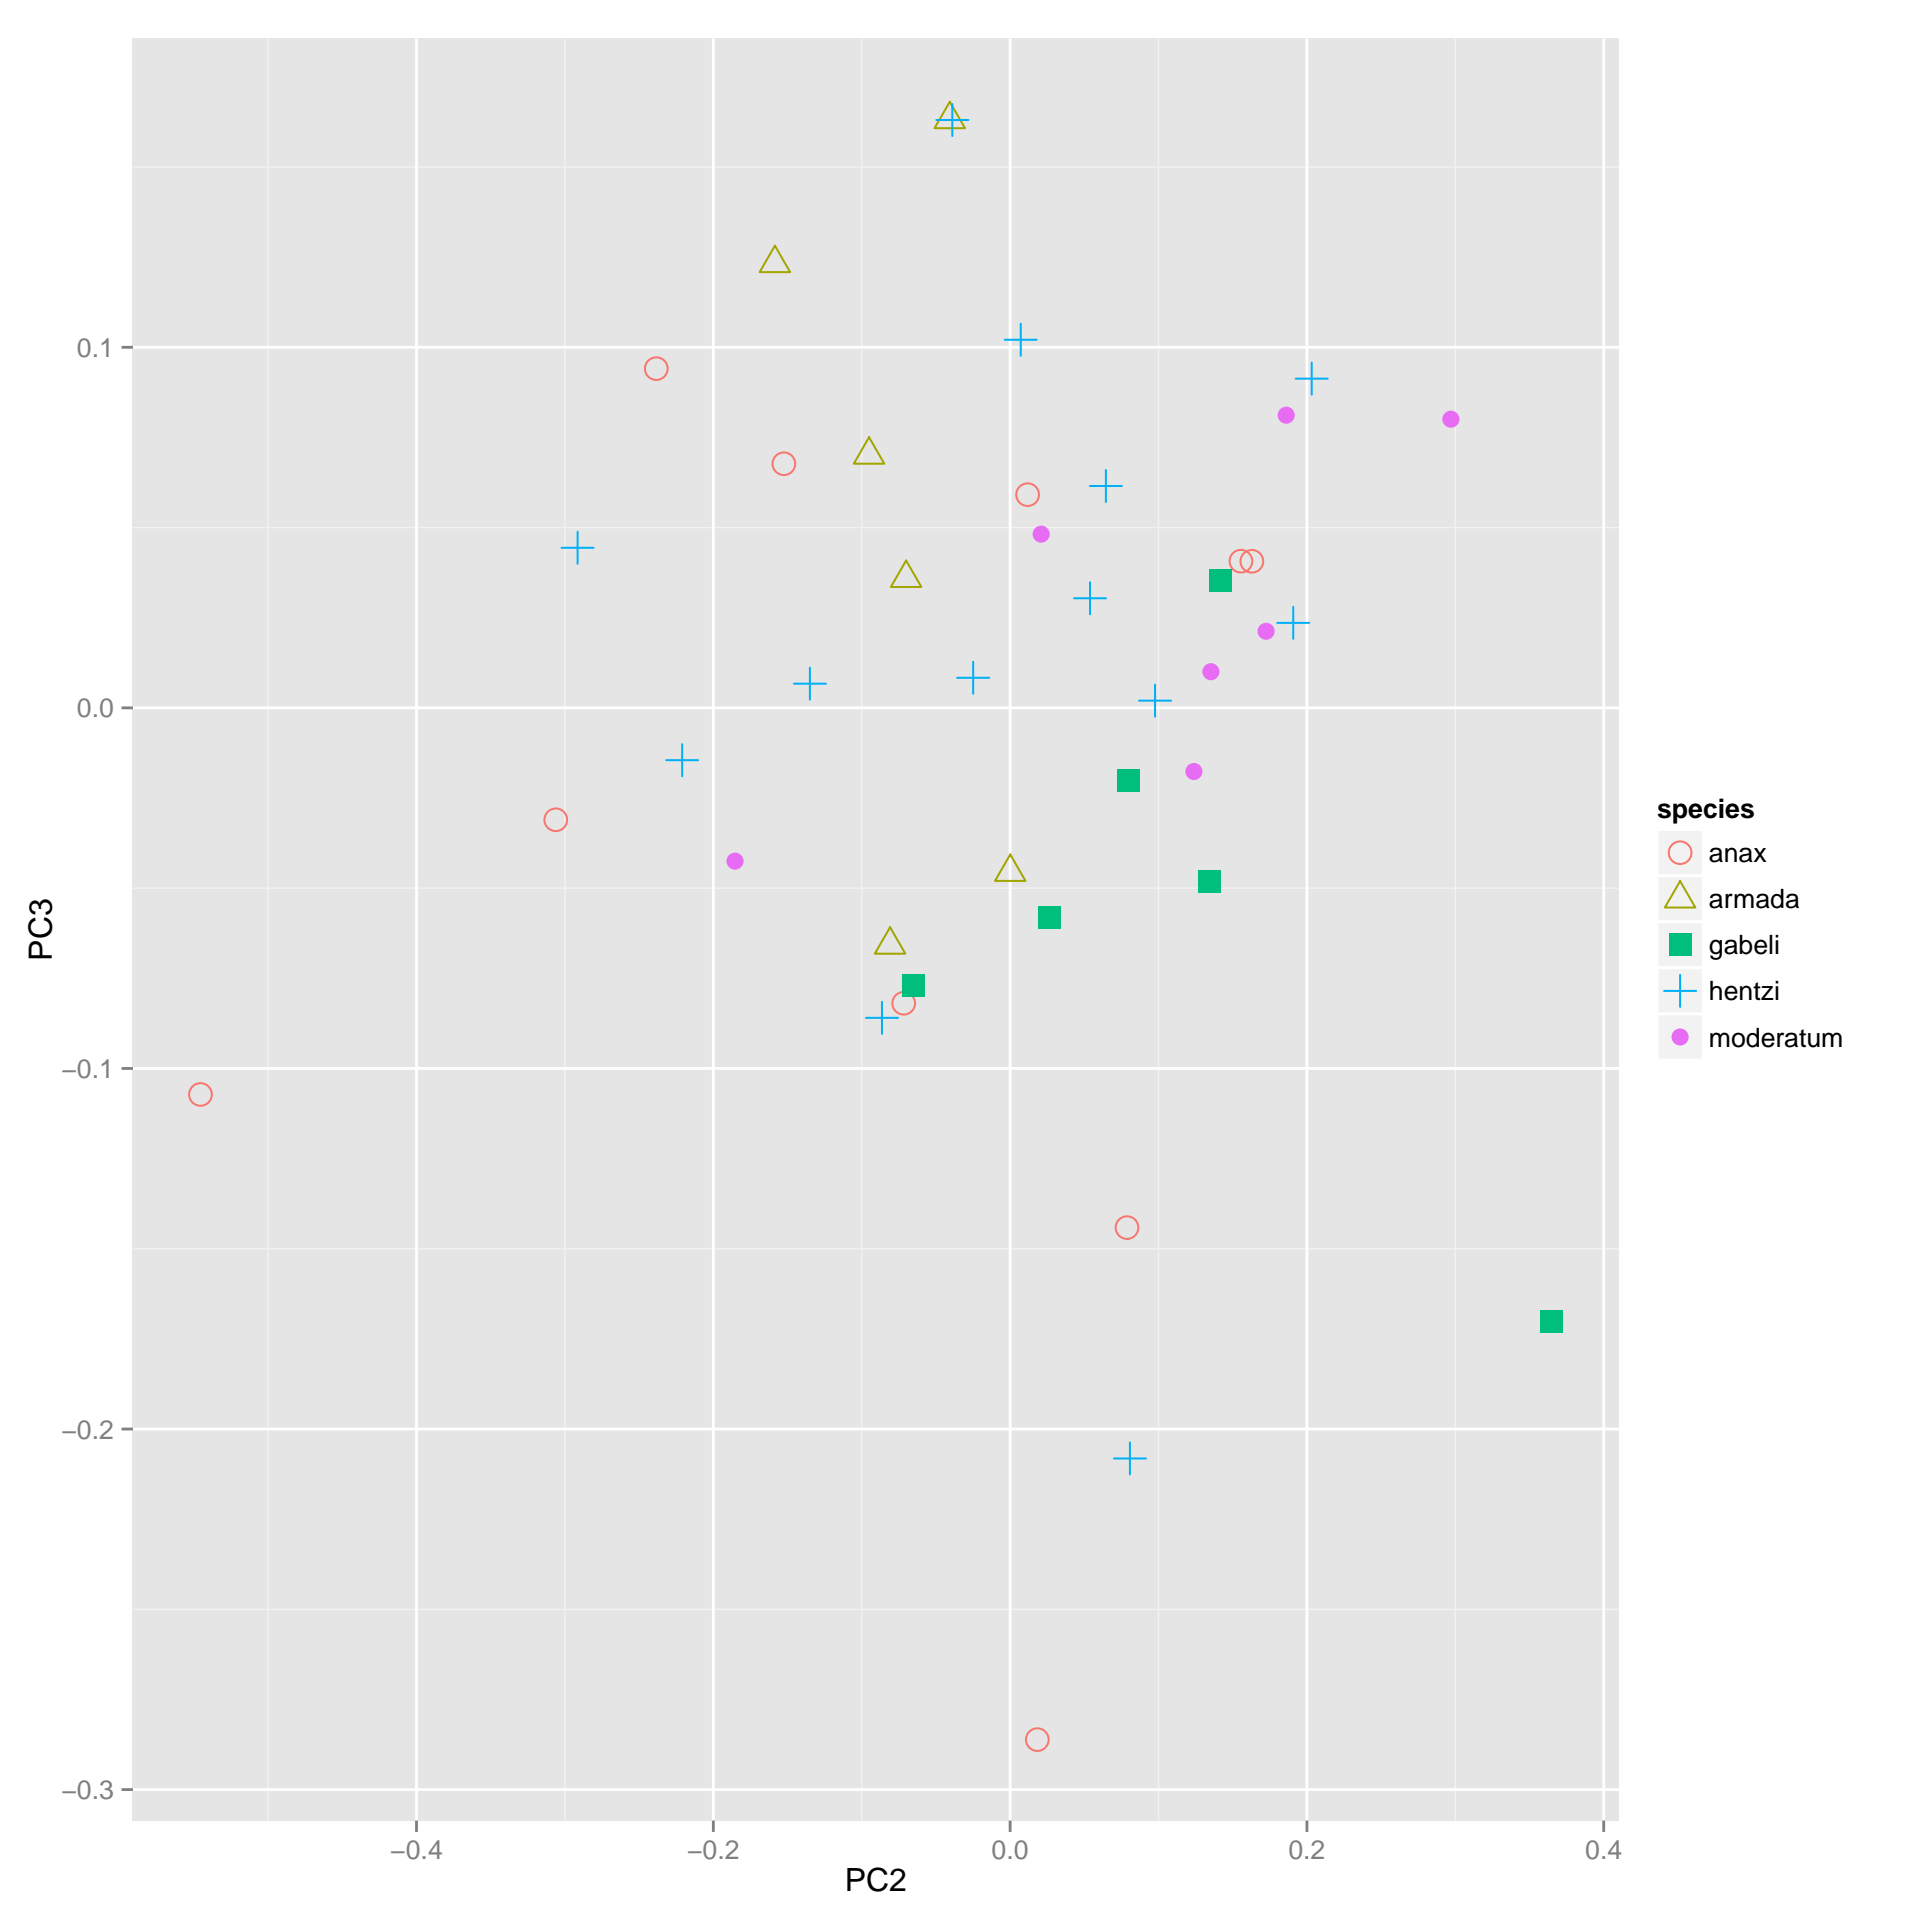

Supplement: Supplementary file 369

## Palpal Tibia/Patella 4 Length ratio – males

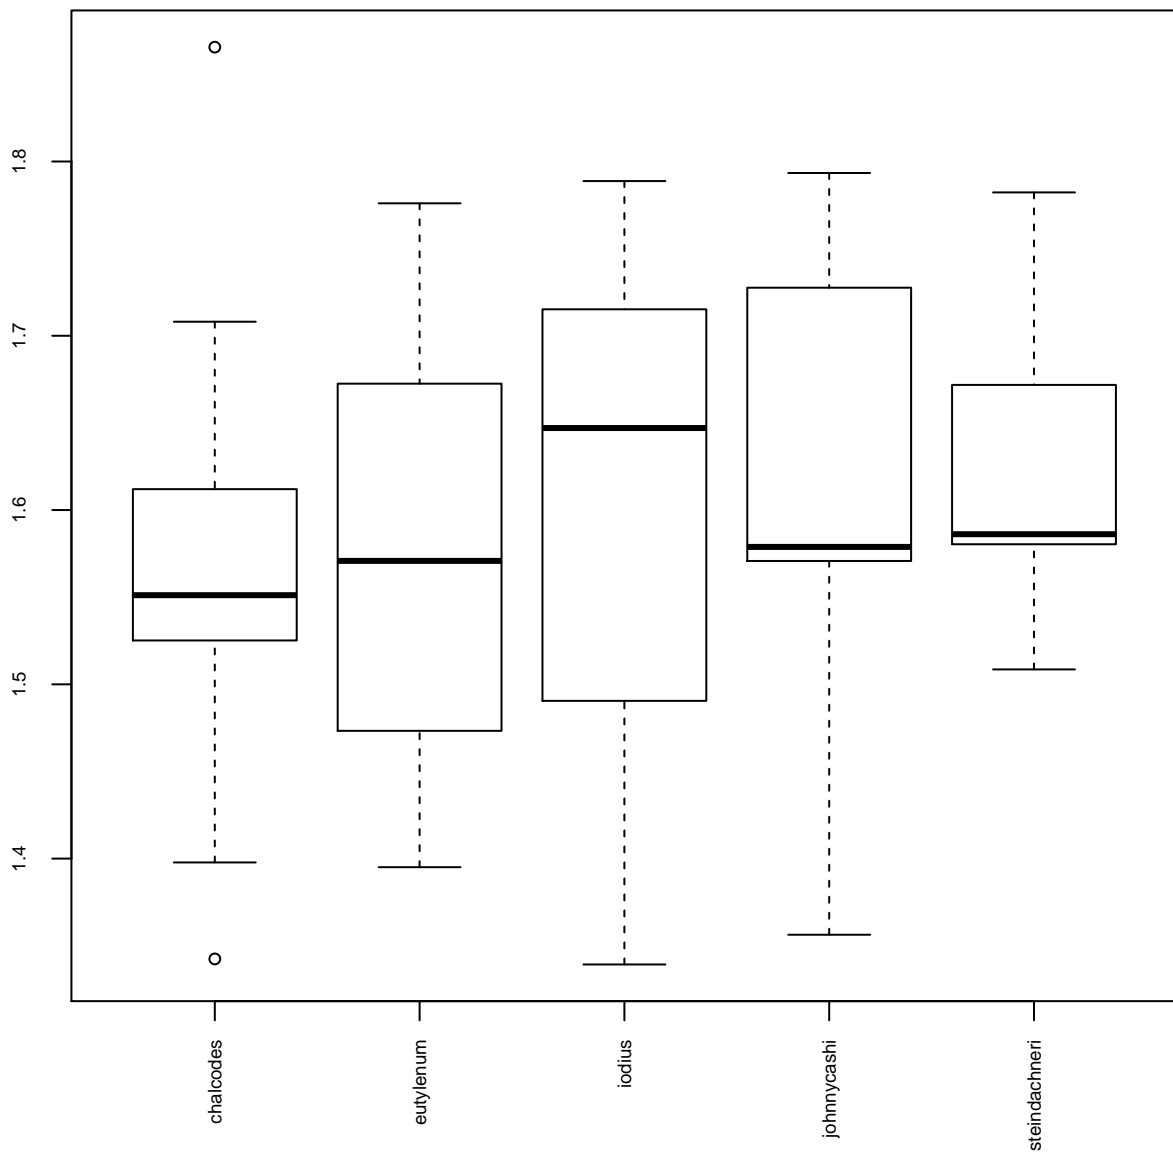

Supplement: Supplementary file 370

## Tibia 3/Patella 4 Length ratio – males

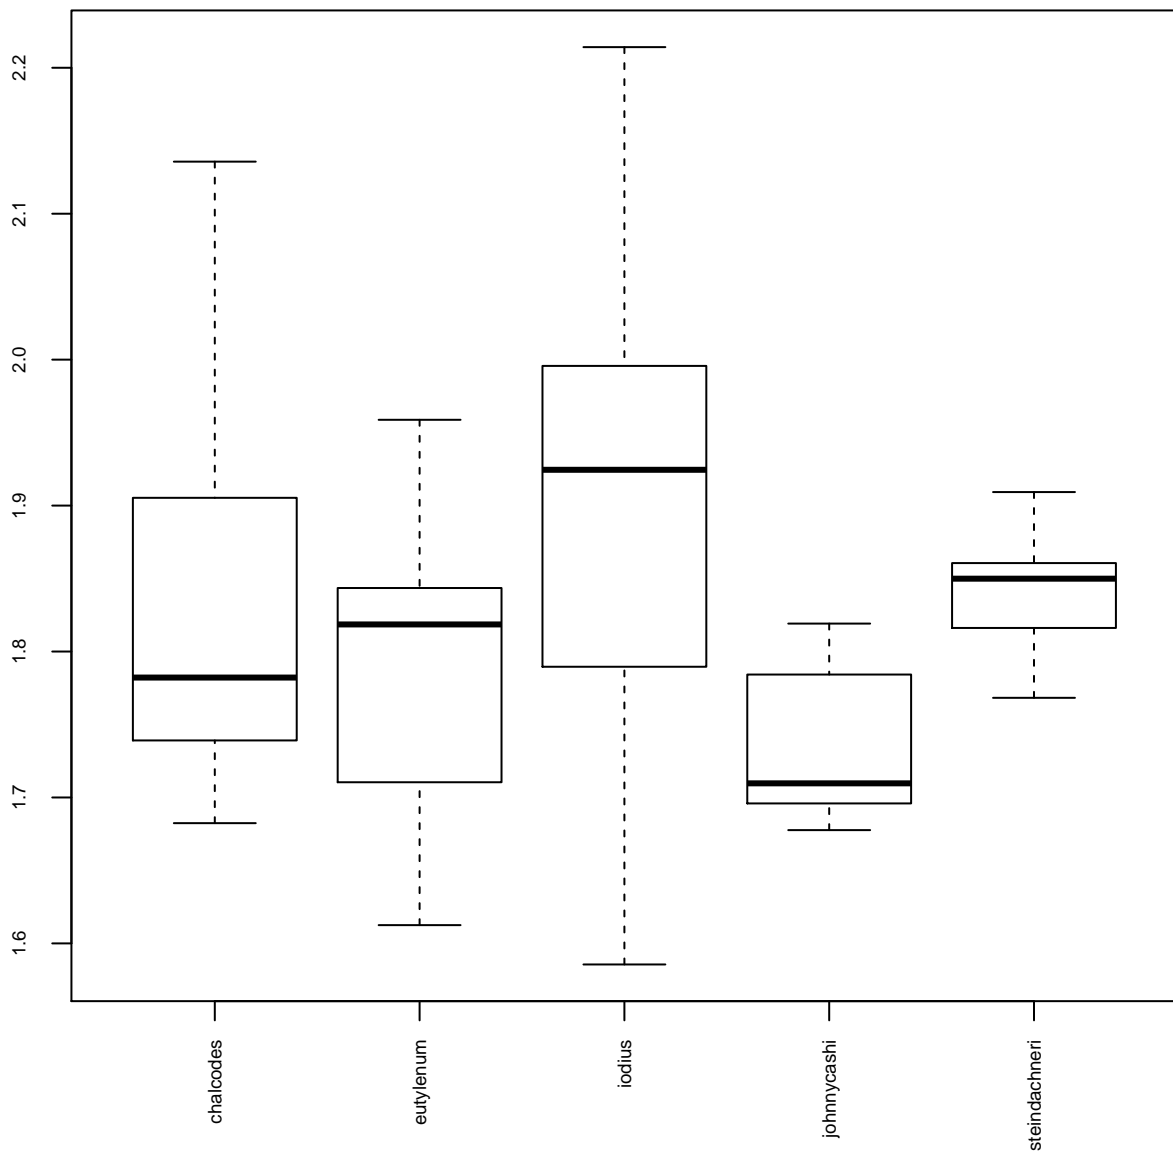

Supplement: Supplementary file 371

## Femur 1/Patella 1 ratio – males

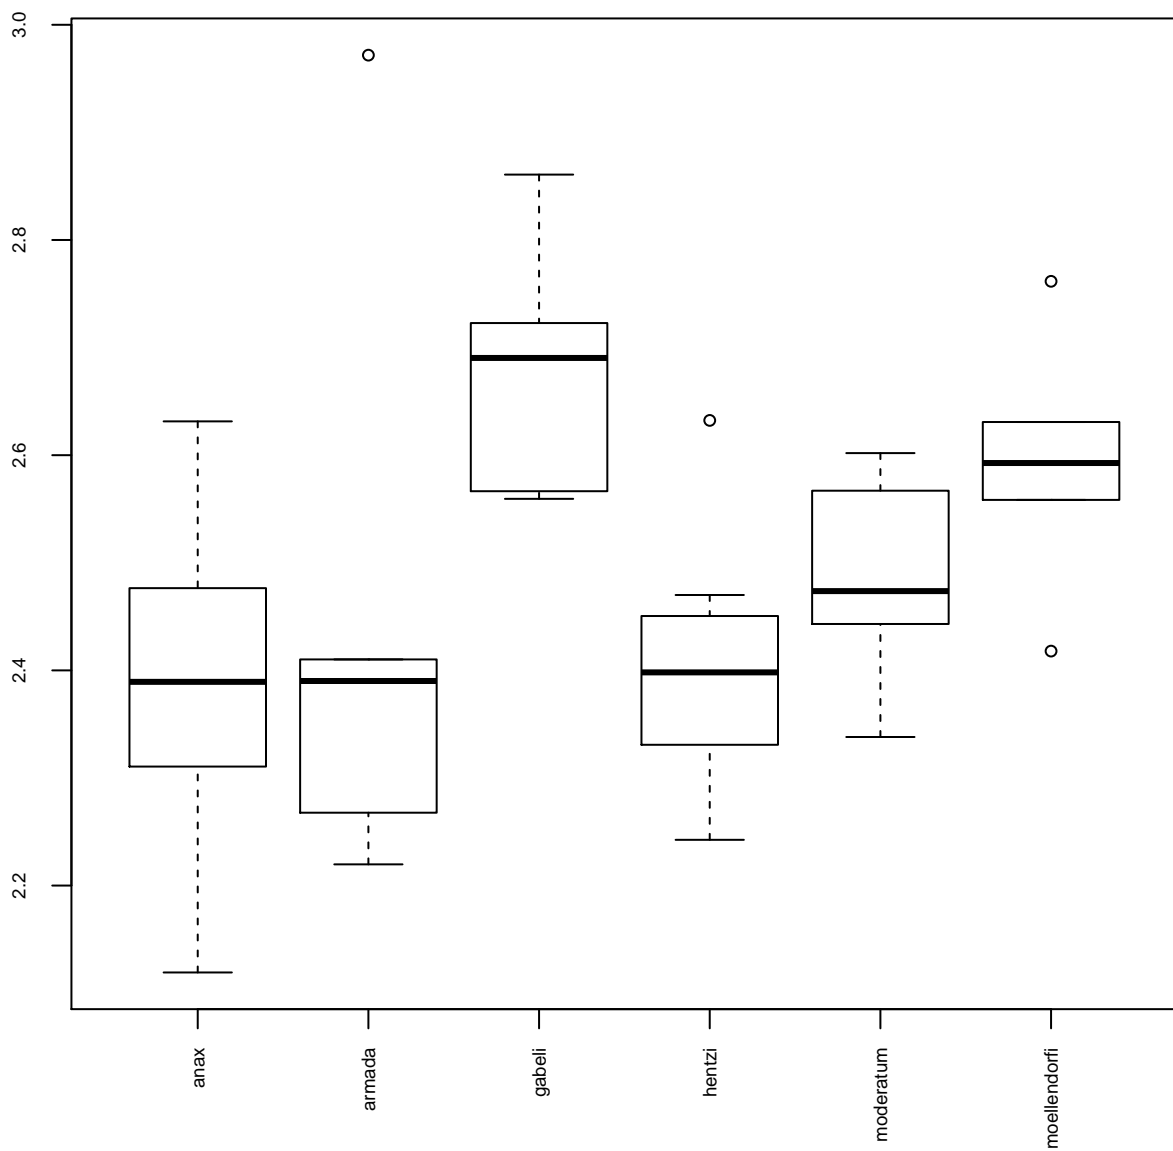

Supplement: Supplementary file 372

# Patella 1/Metatarsus 1 ratio – females

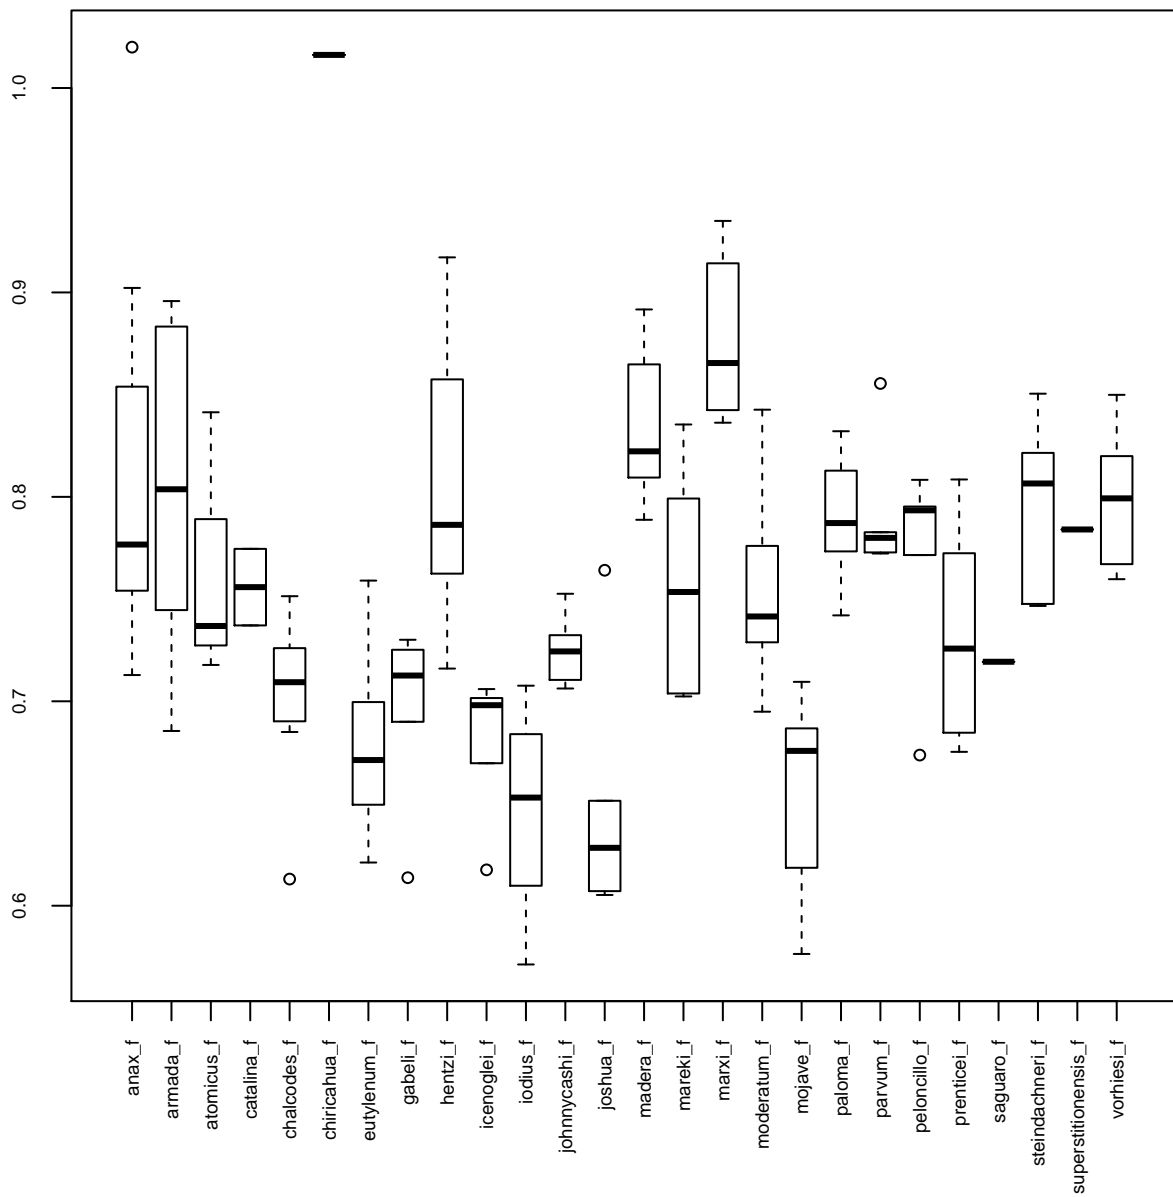

Supplement: Supplementary file 373

## Femur 3/Patella 3 ratio – males

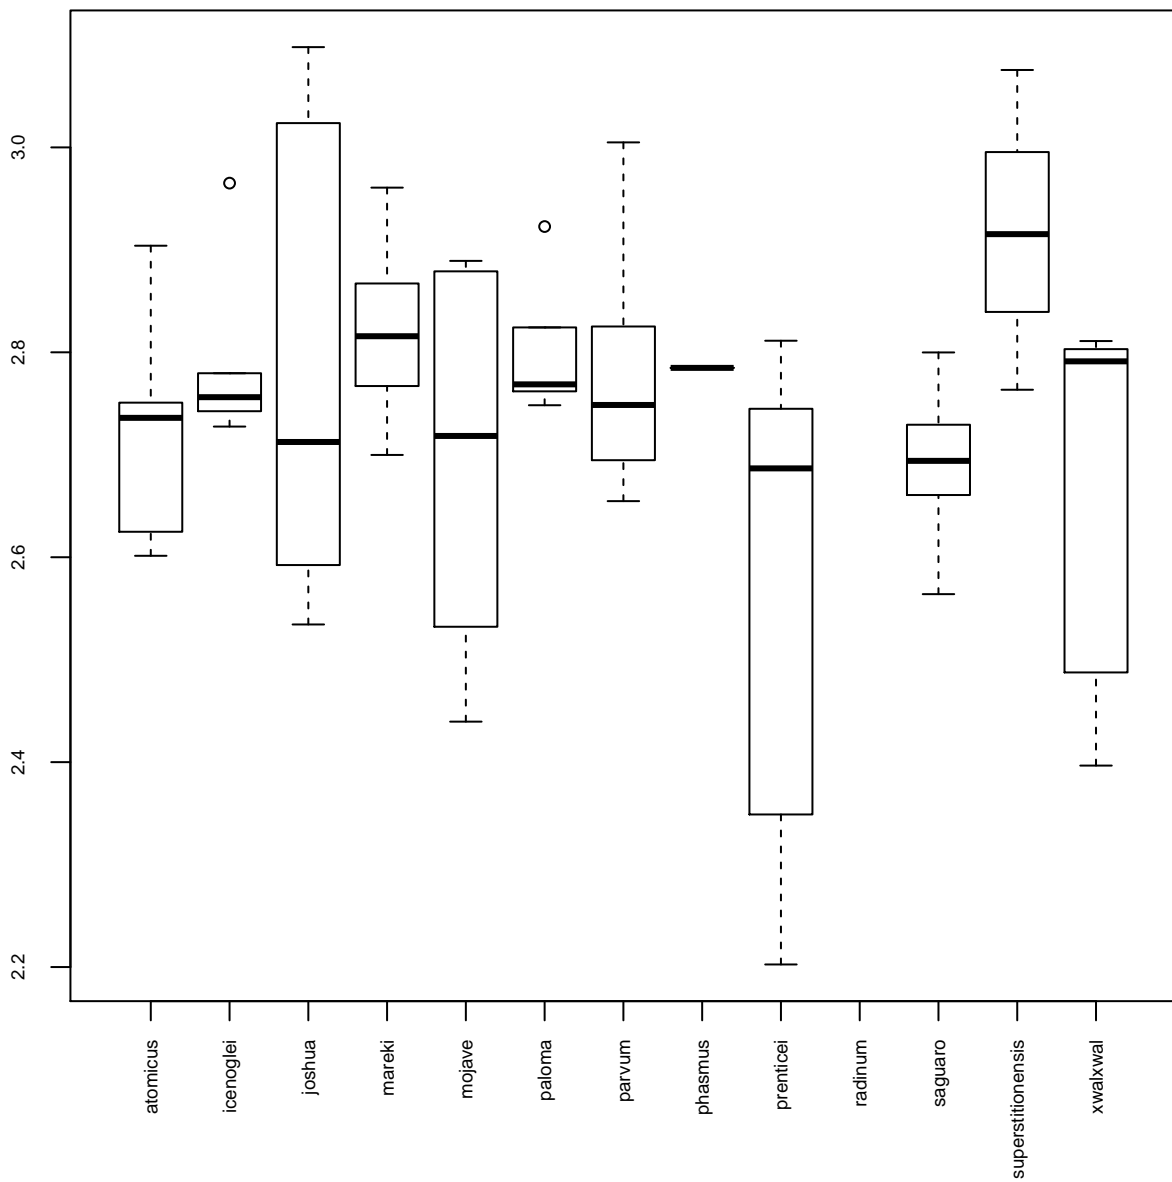

Supplement: Supplementary file 374

## Leg 3 Length/Carapace Length ratio – females

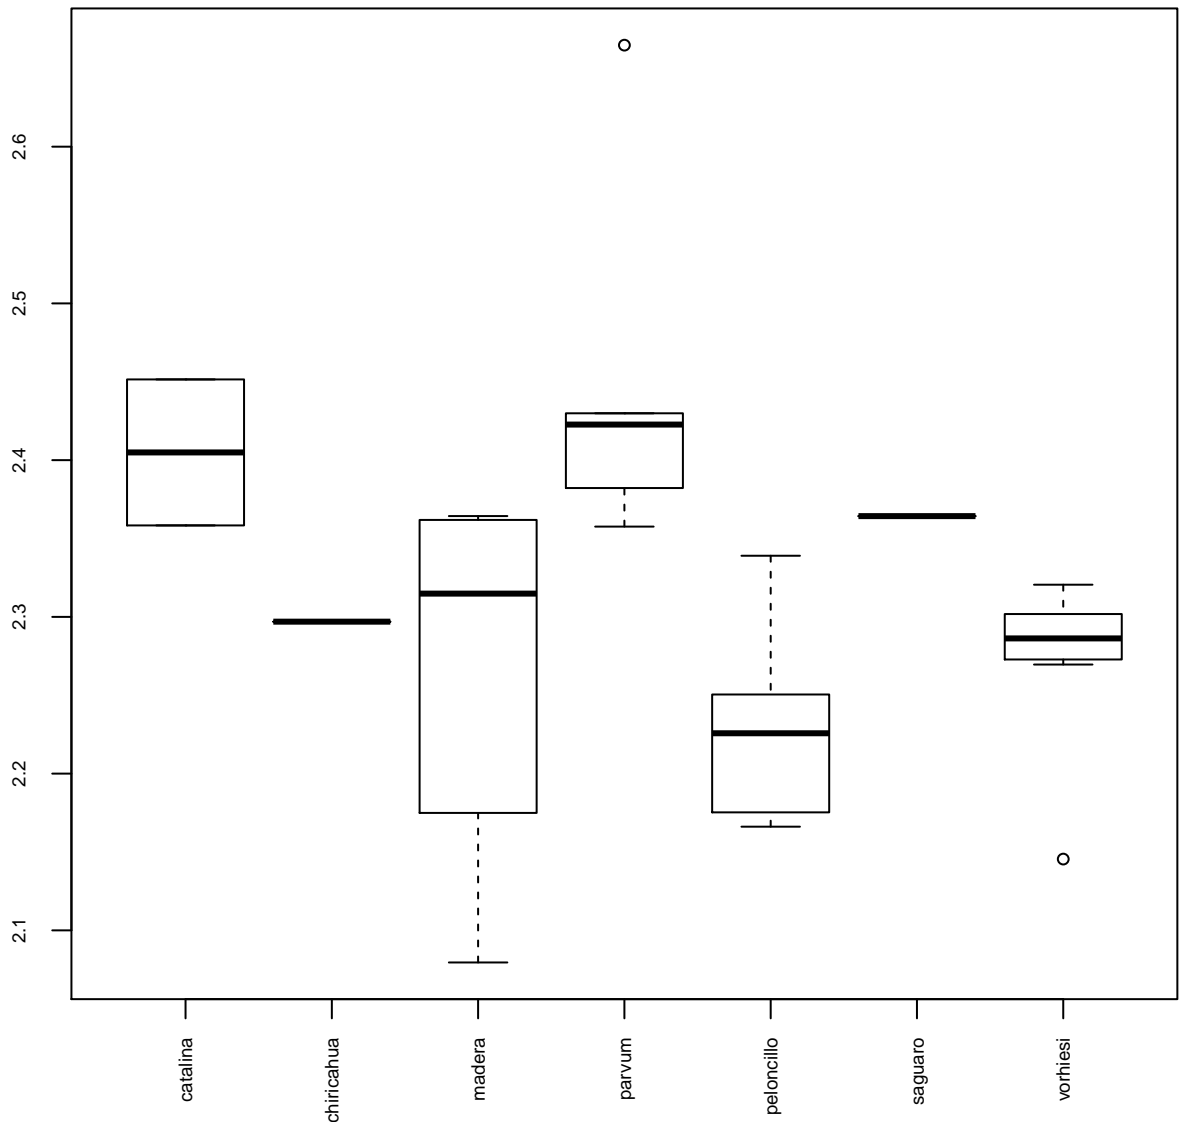

Supplement: Supplementary file 375

# Femur 3/Tarsus 3 ratio – females

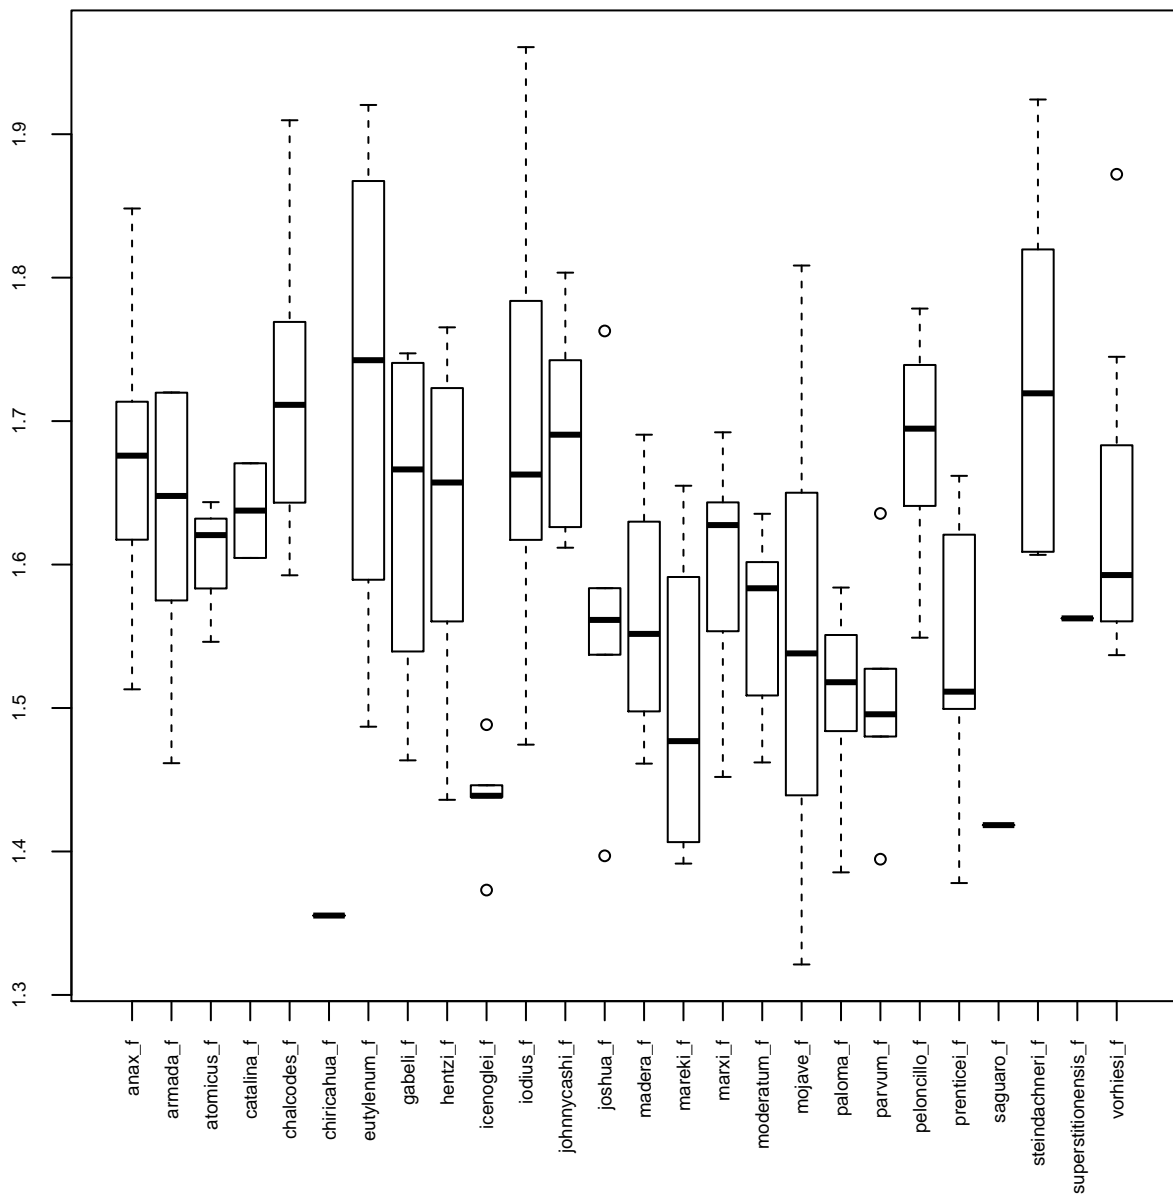

Supplement: Supplementary file 376

## Palpal Tibia/Femur 1 Length ratio – males

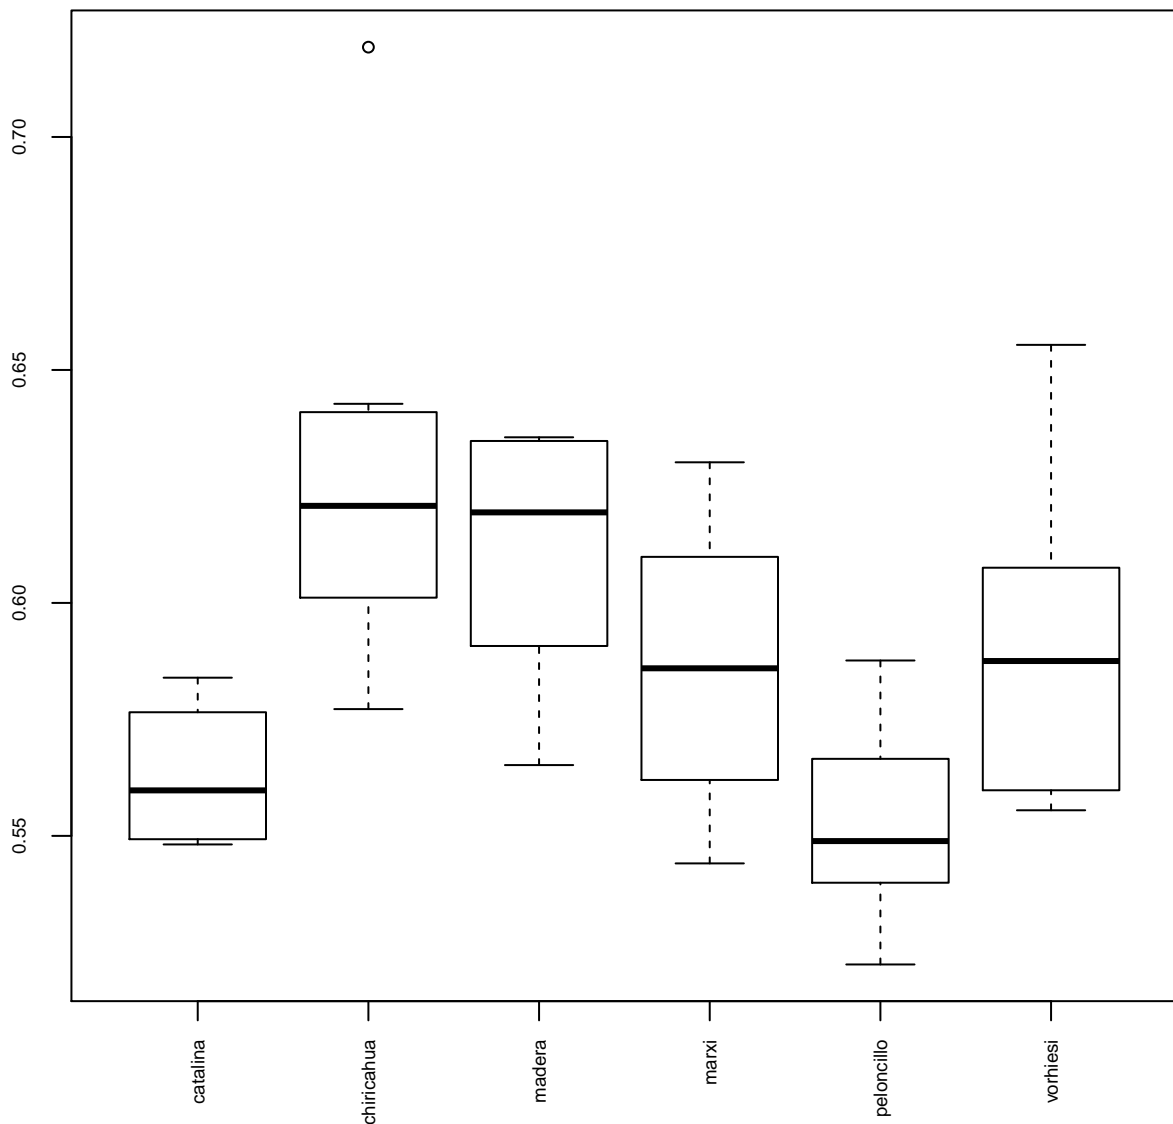

Supplement: Supplementary file 377

## Femur 4 Length/Width ratio – males

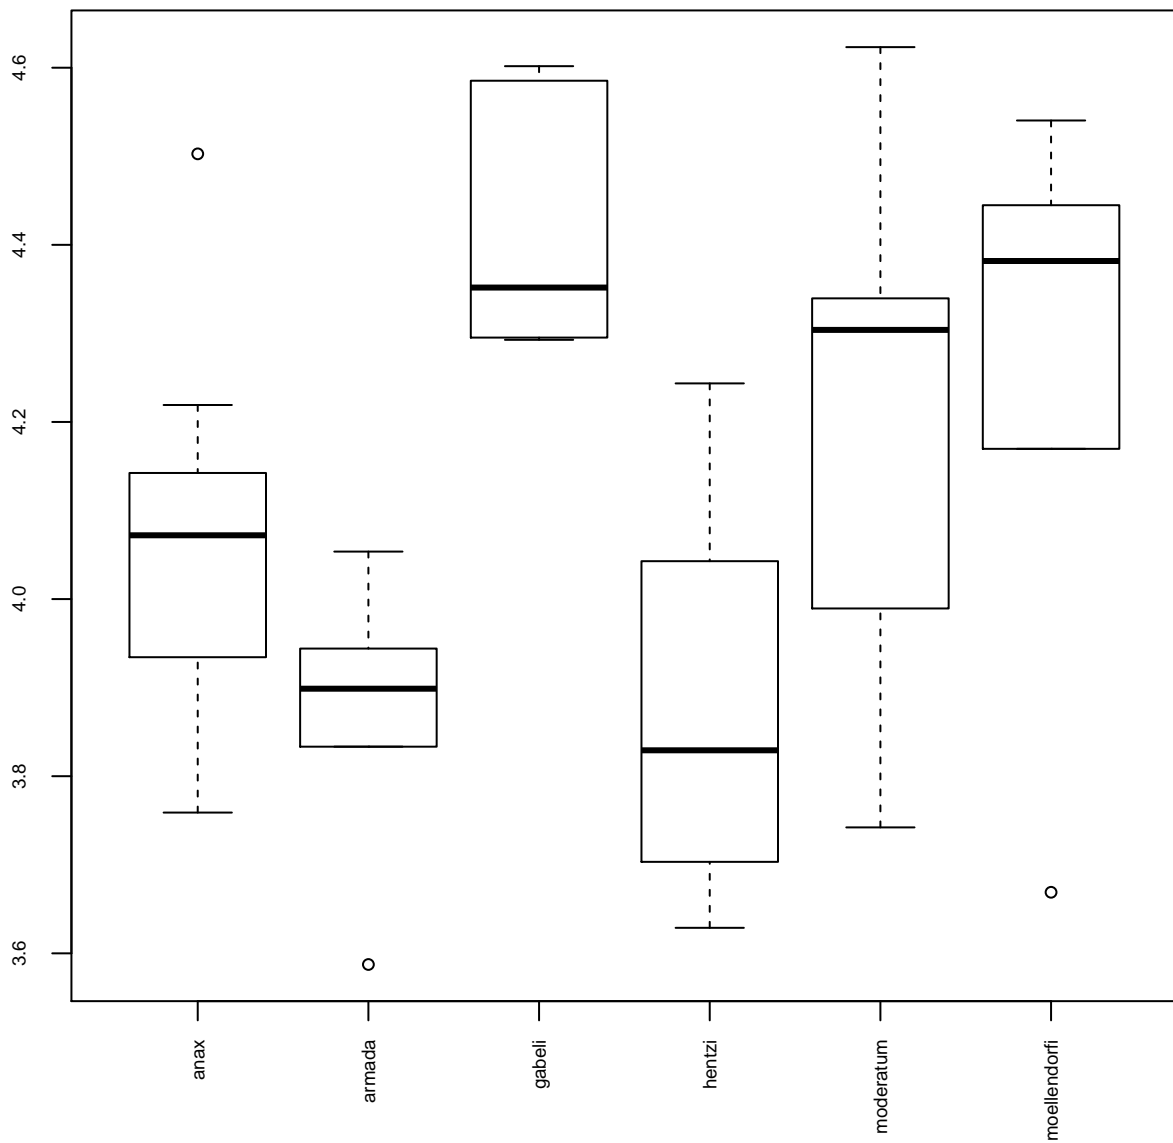

Supplement: Supplementary file 378

# Femur 3/Tibia 4 Length ratio – females

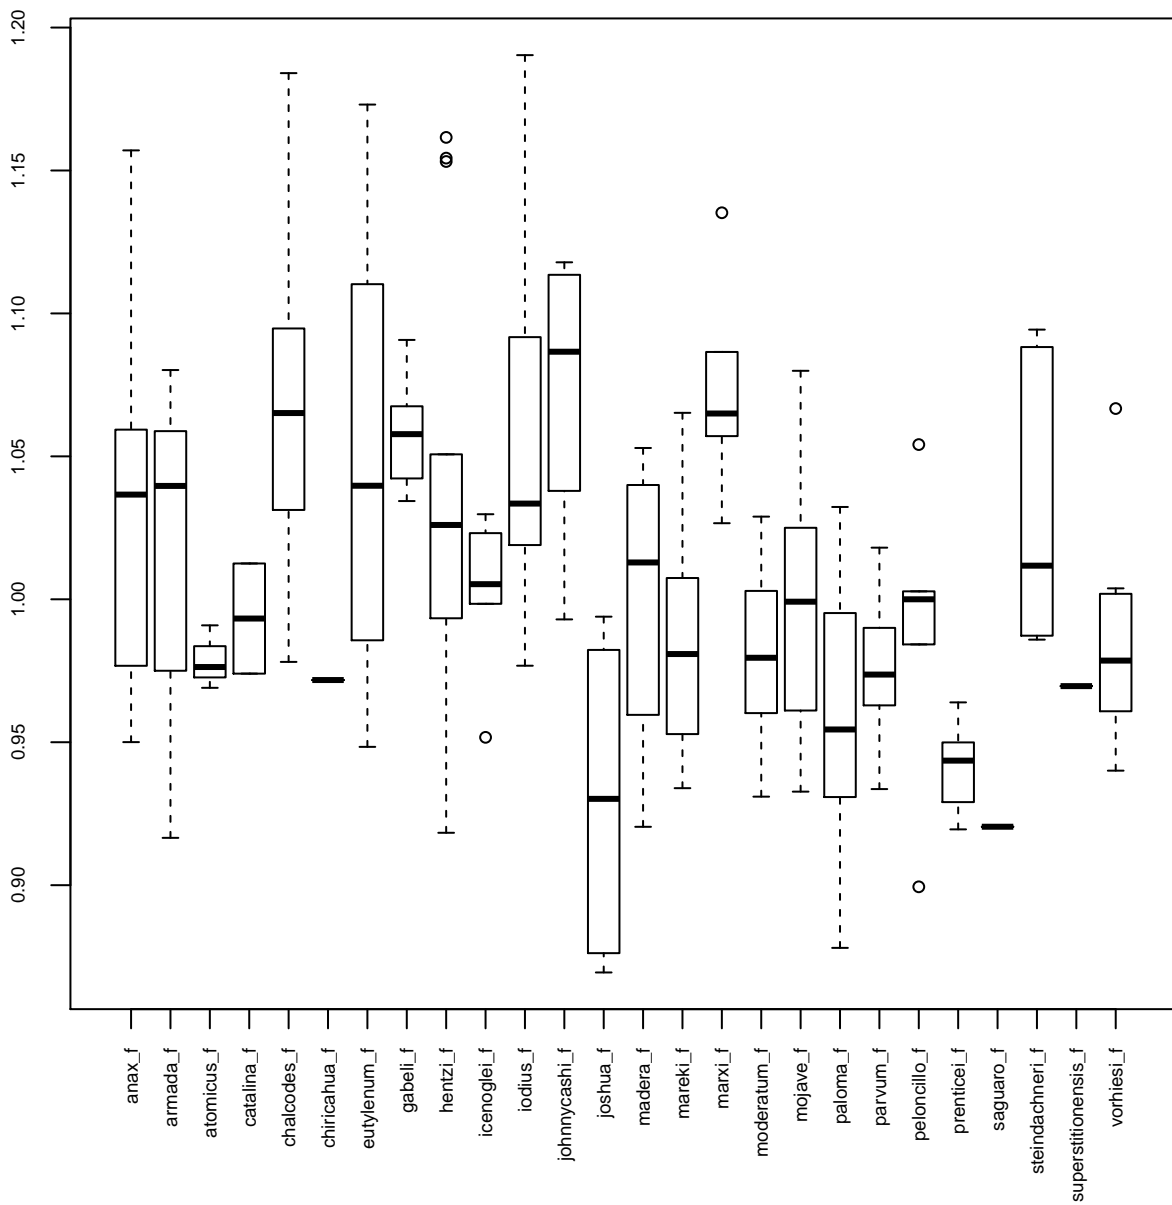

Supplement: Supplementary file 379

## Metatarsus 1/Tibia 4 Length ratio – females

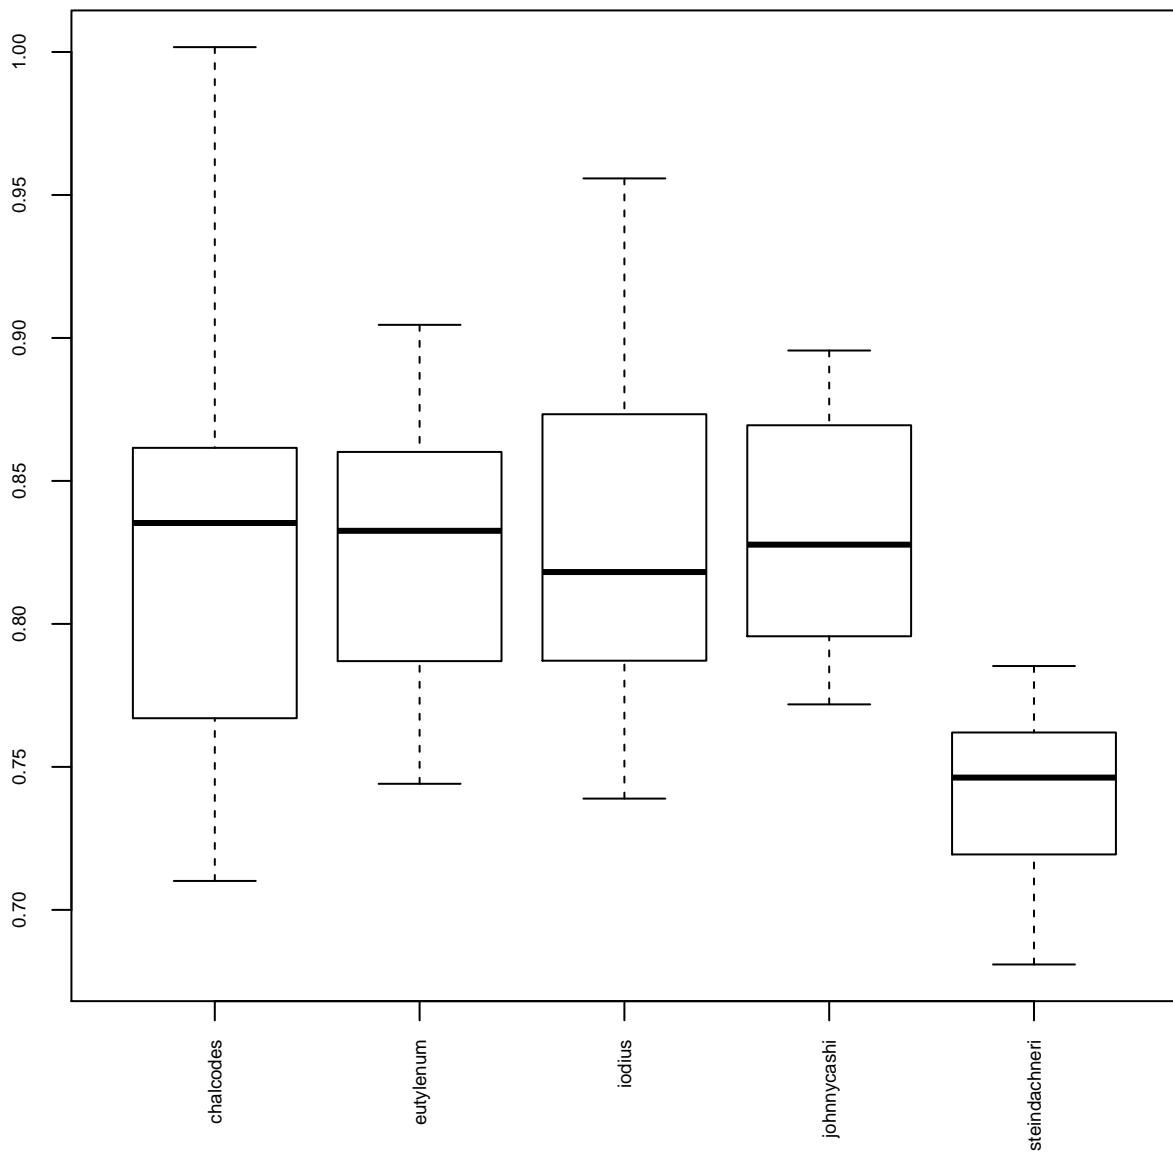

Supplement: Supplementary file 380

## Carapace Length/Width ratio – males

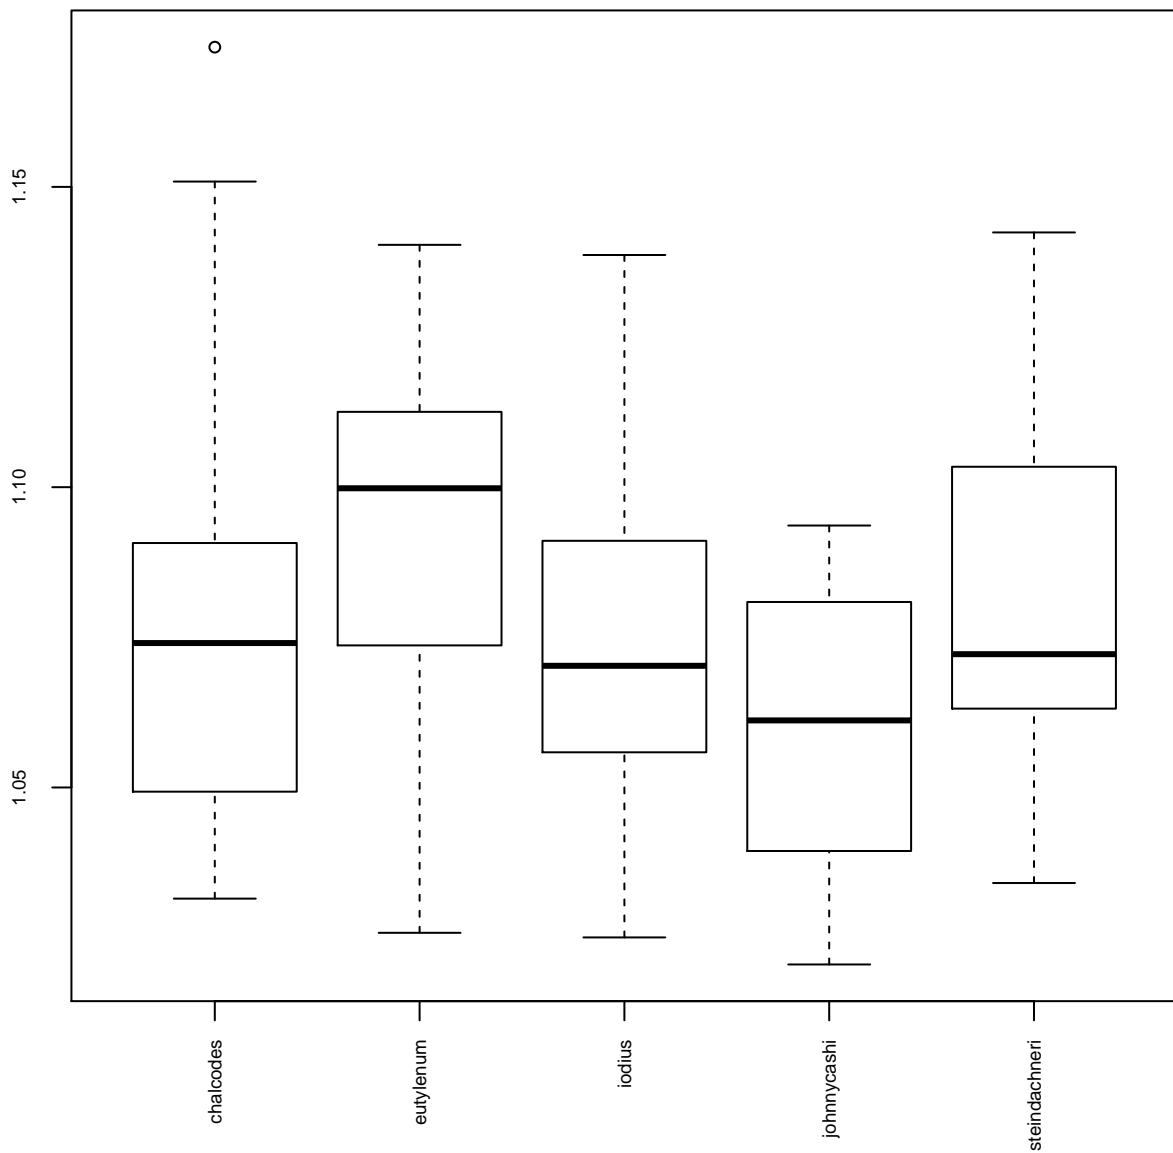

Supplement: Supplementary file 381

# Patella 1/Metatarsus 1 ratio – males

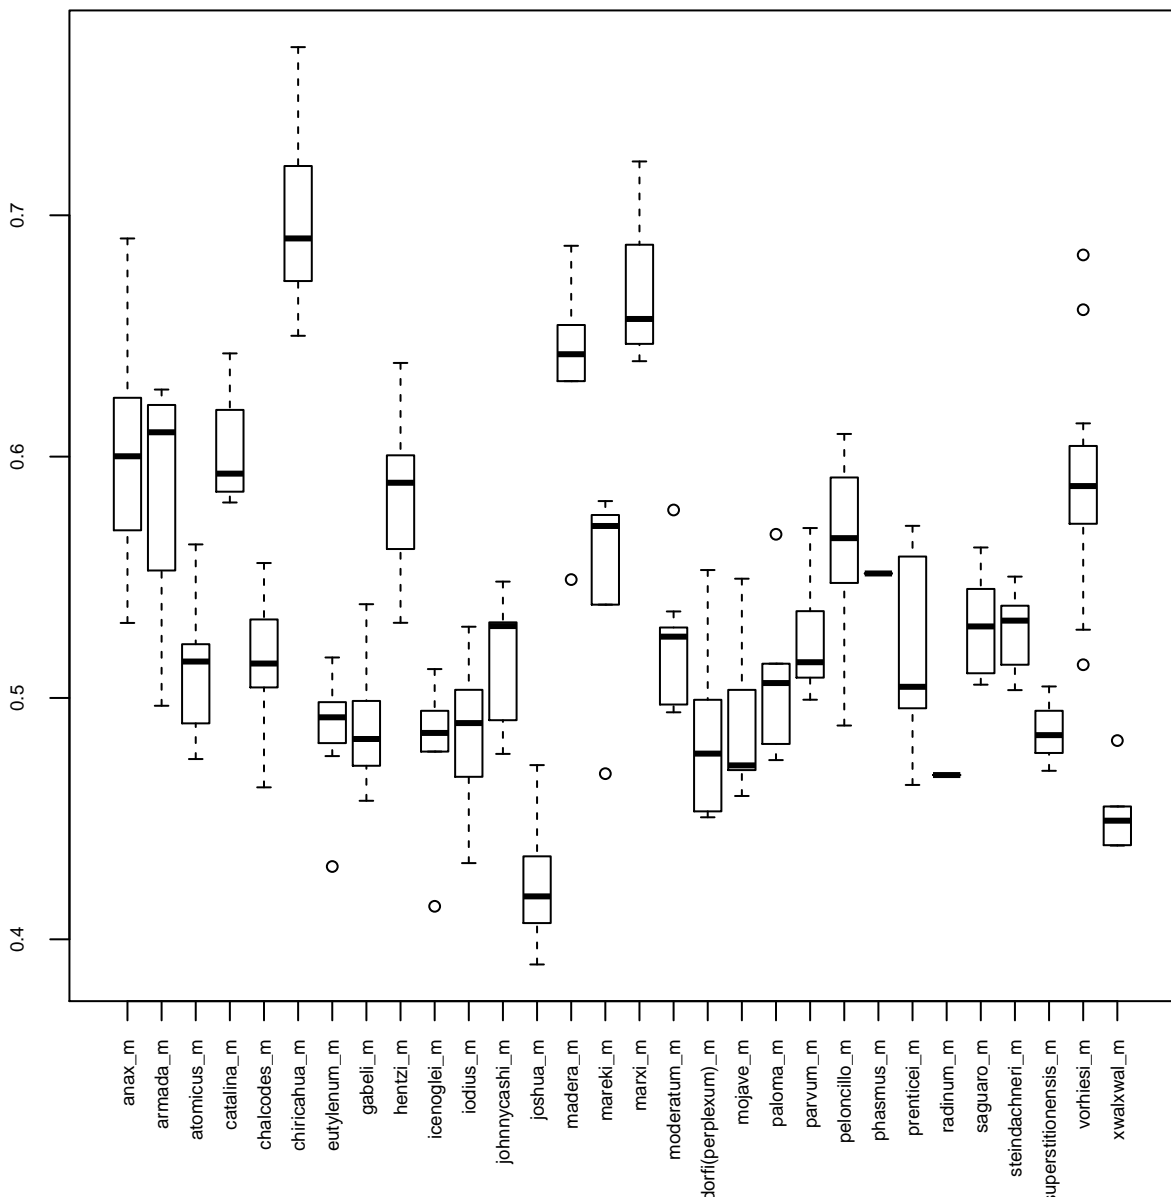

Supplement: Supplementary file 382

# Tibia 1/Tarsus 4 Length ratio – males

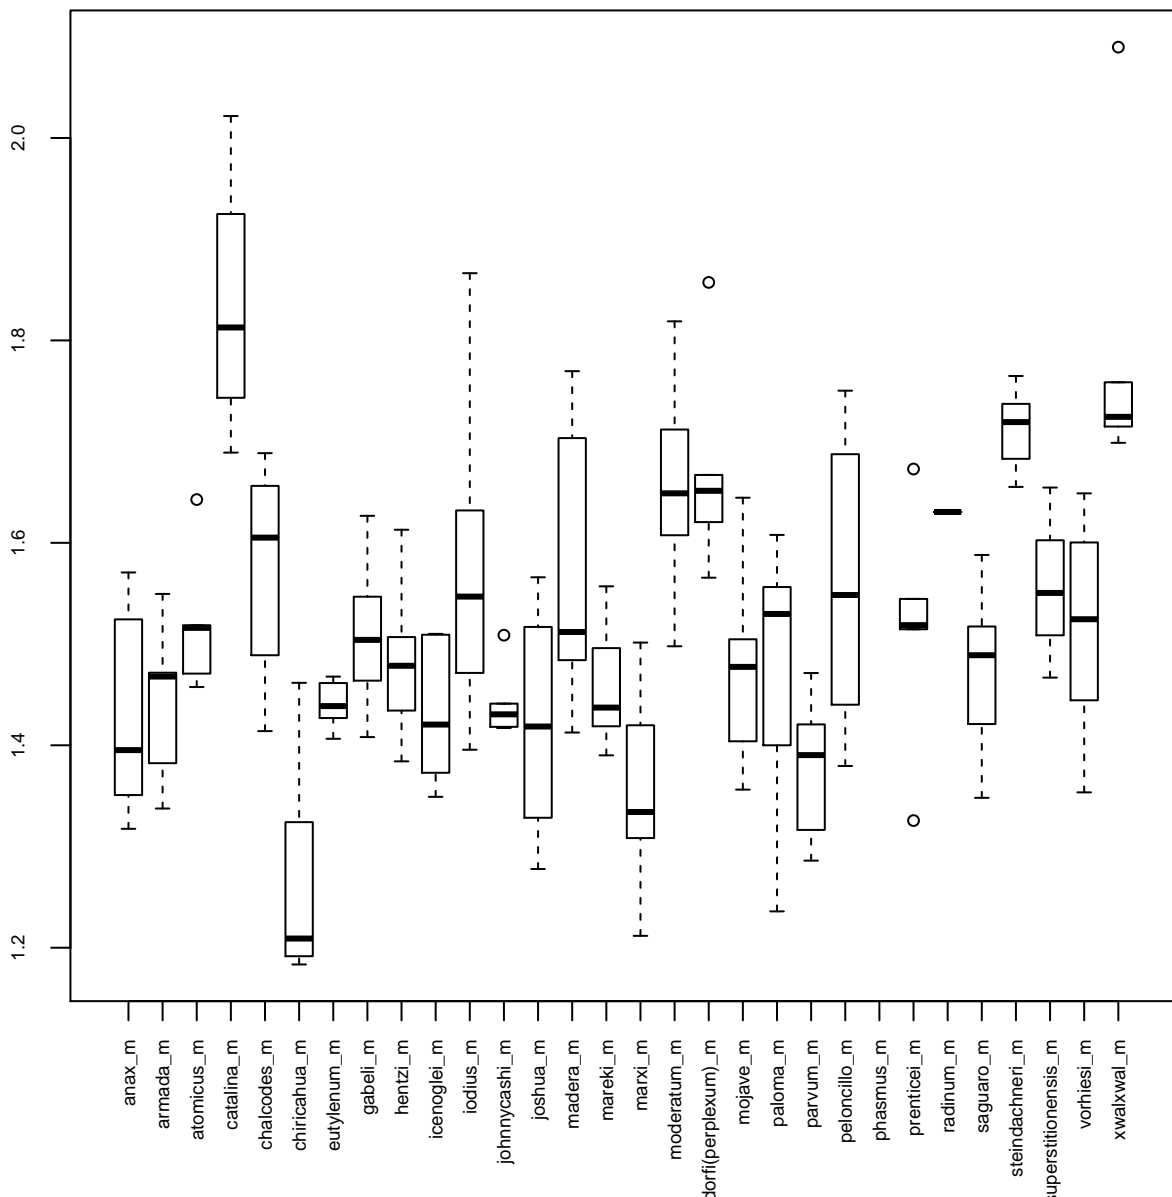

Supplement: Supplementary file 383

## Carapace Length/Patella 3 ratio – males

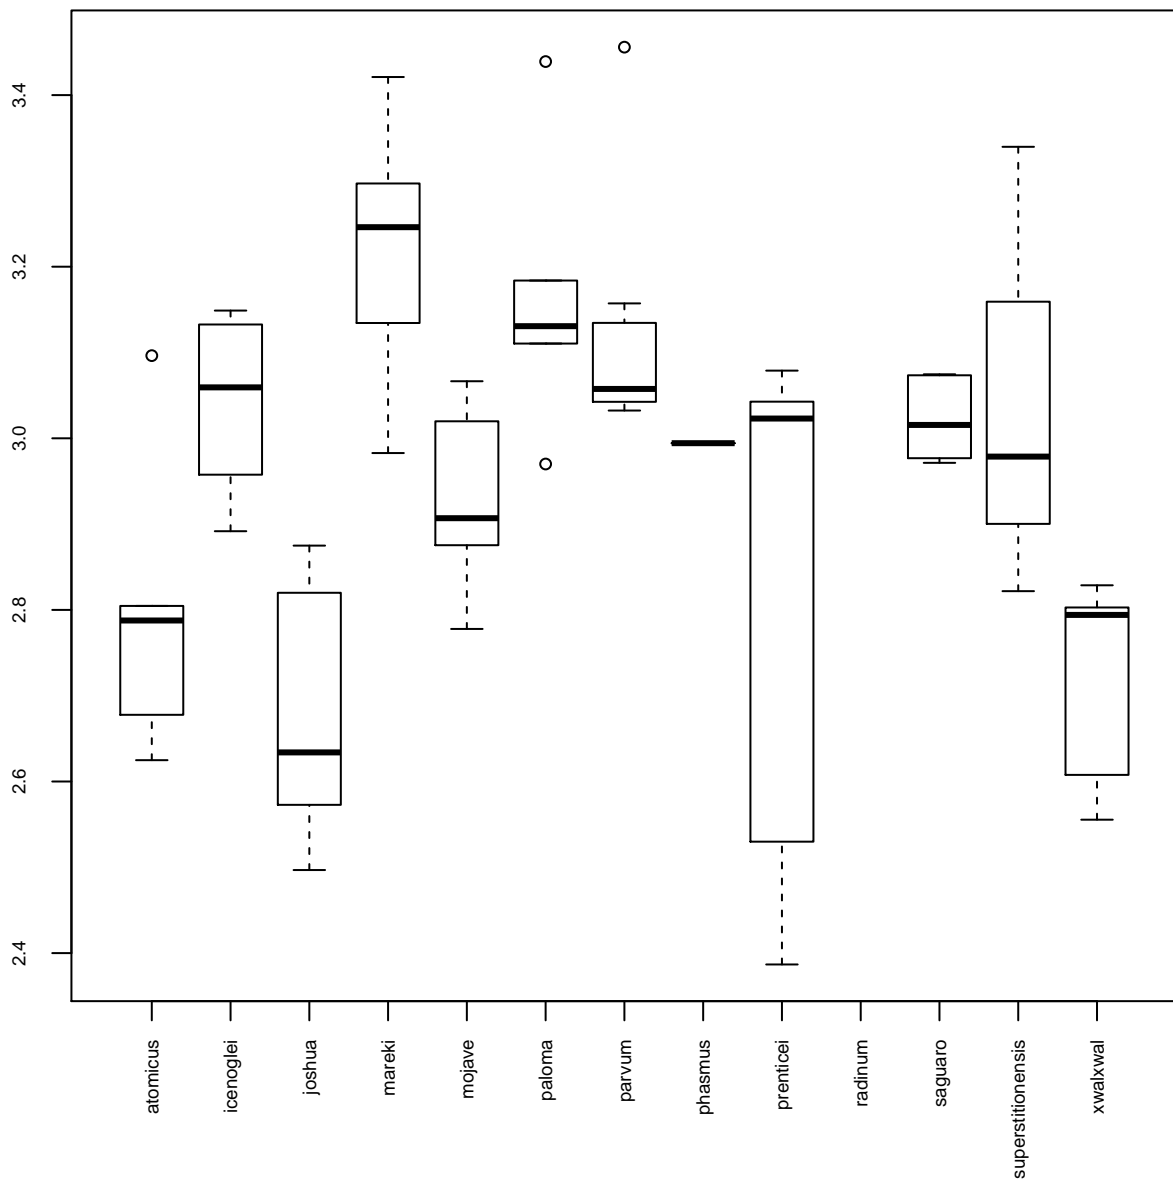

Supplement: Supplementary file 384

# Carapace Length/Tarsus 4 ratio – females

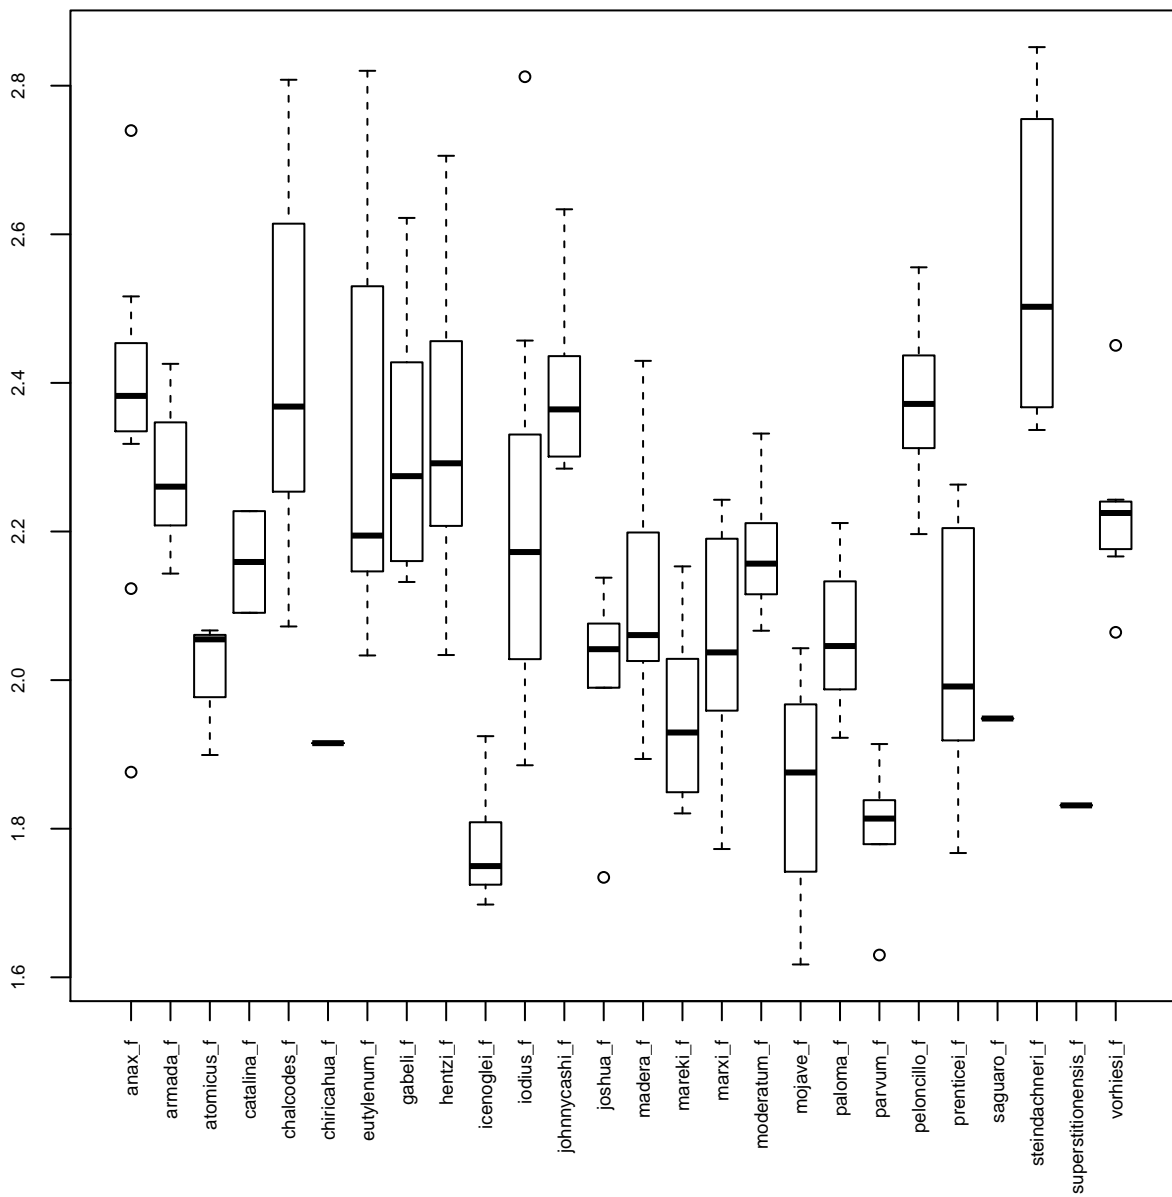

Supplement: Supplementary file 385

## Tarsus 3/Femur 4 Length ratio – females

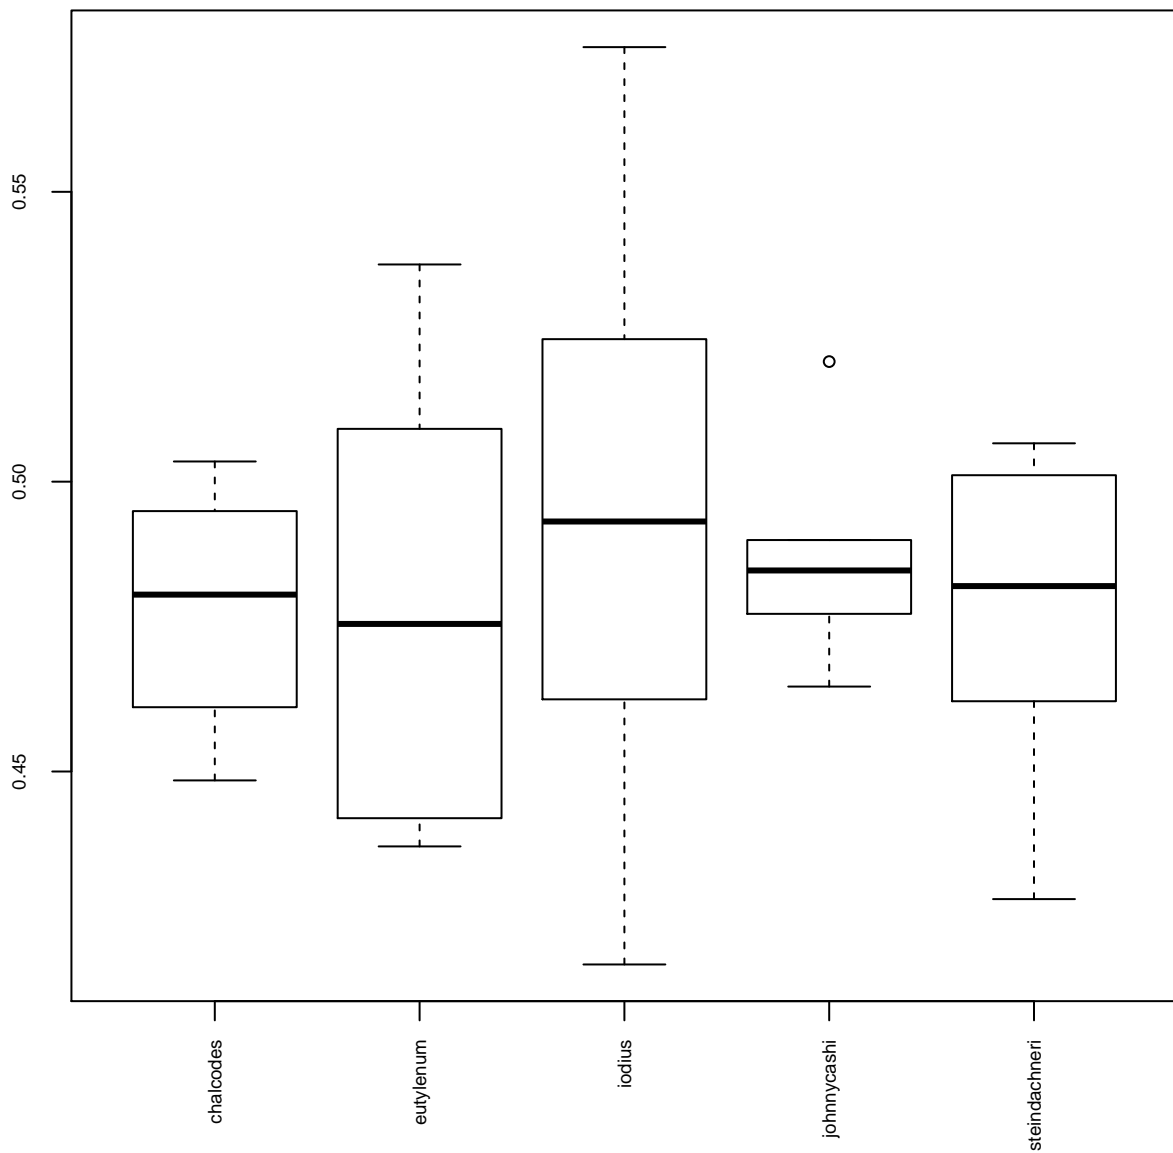

Supplement: Supplementary file 386

## Femur 1/Tibia 1 ratio – females

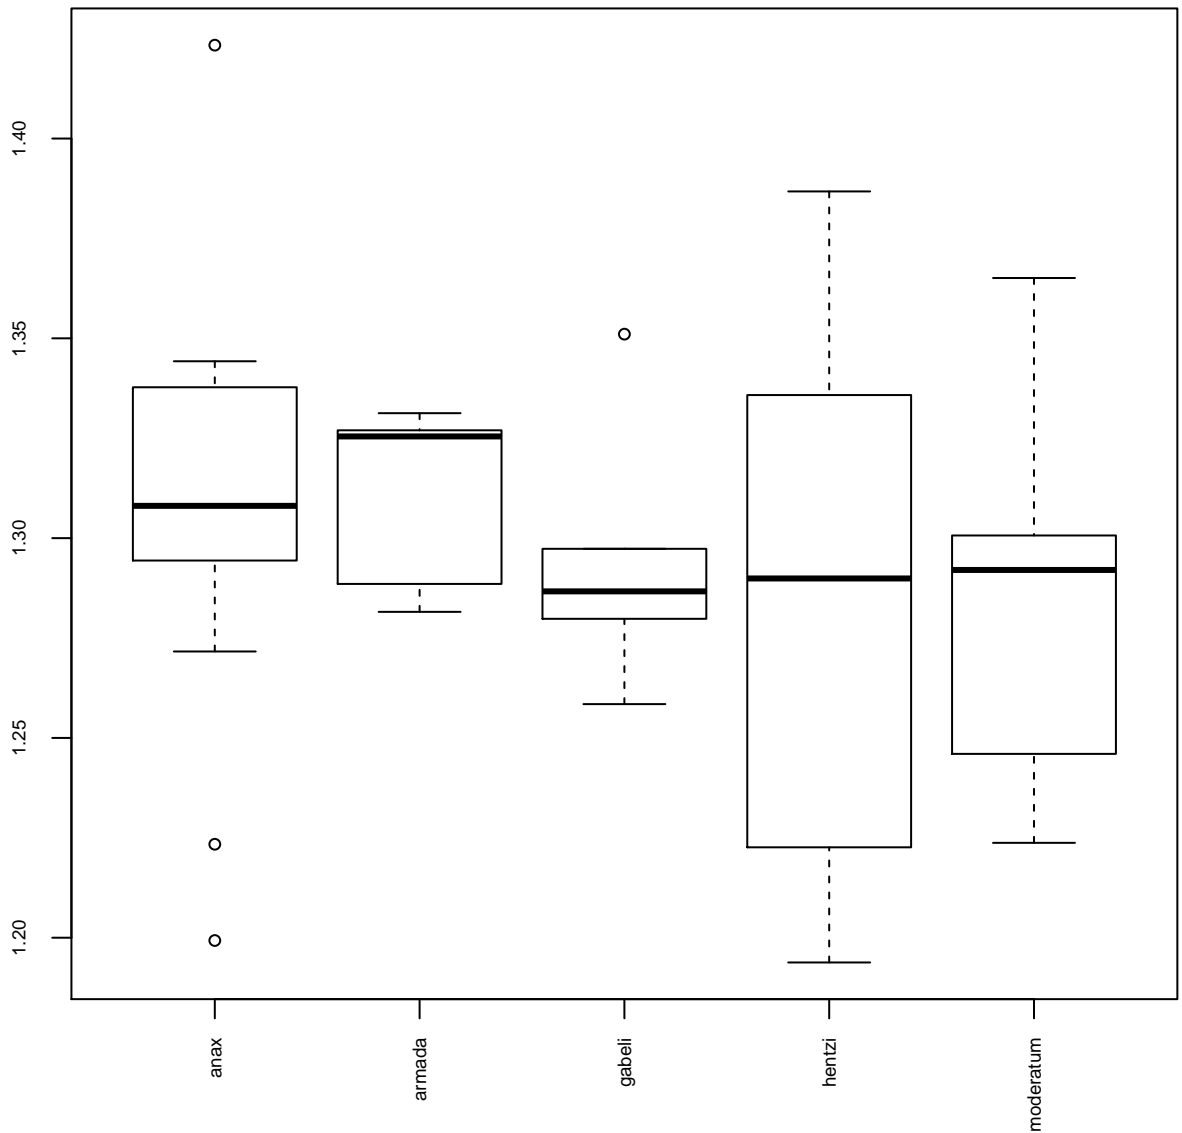

Supplement: Supplementary file 387

# Patella 1/Femur 3 Length ratio – males

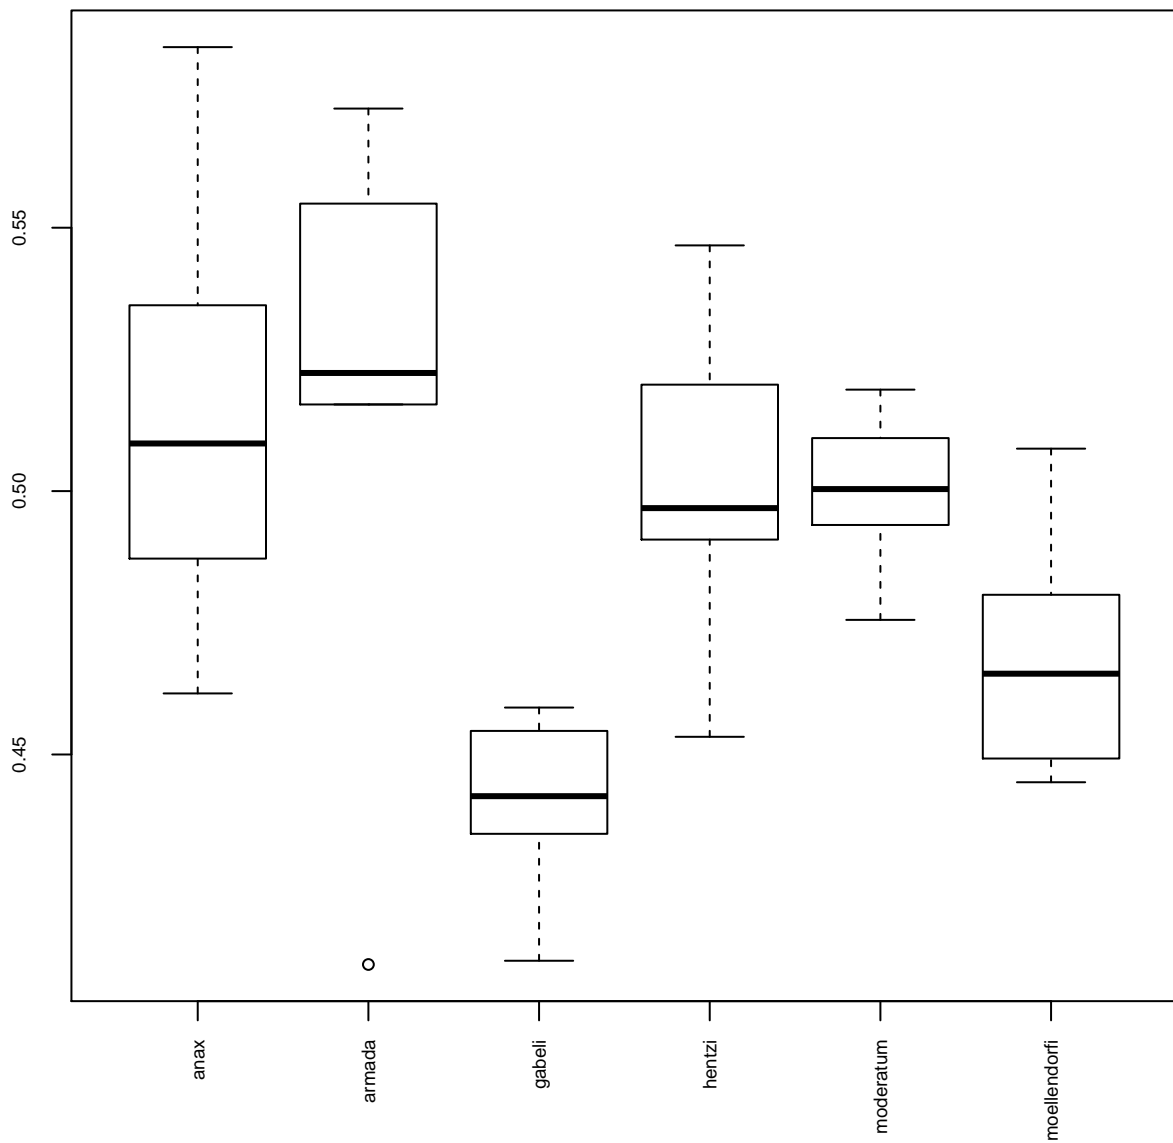

Supplement: Supplementary file 388

# Metatarsus 4/Tarsus 4 ratio – males

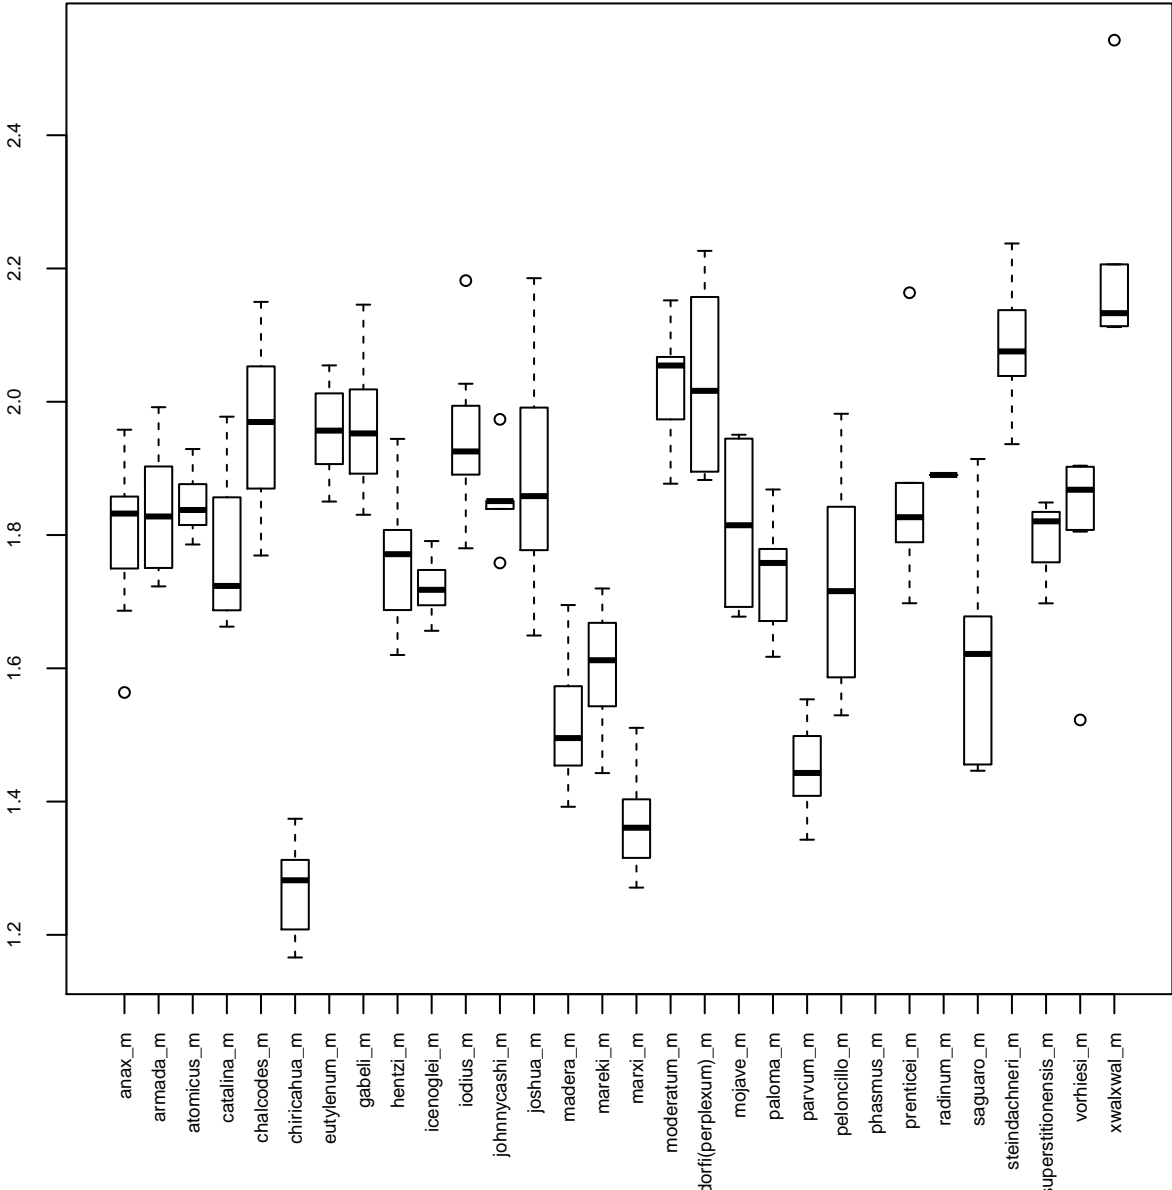

Supplement: Supplementary file 389

## Metatarsus 1/Femur 4 Length ratio – males

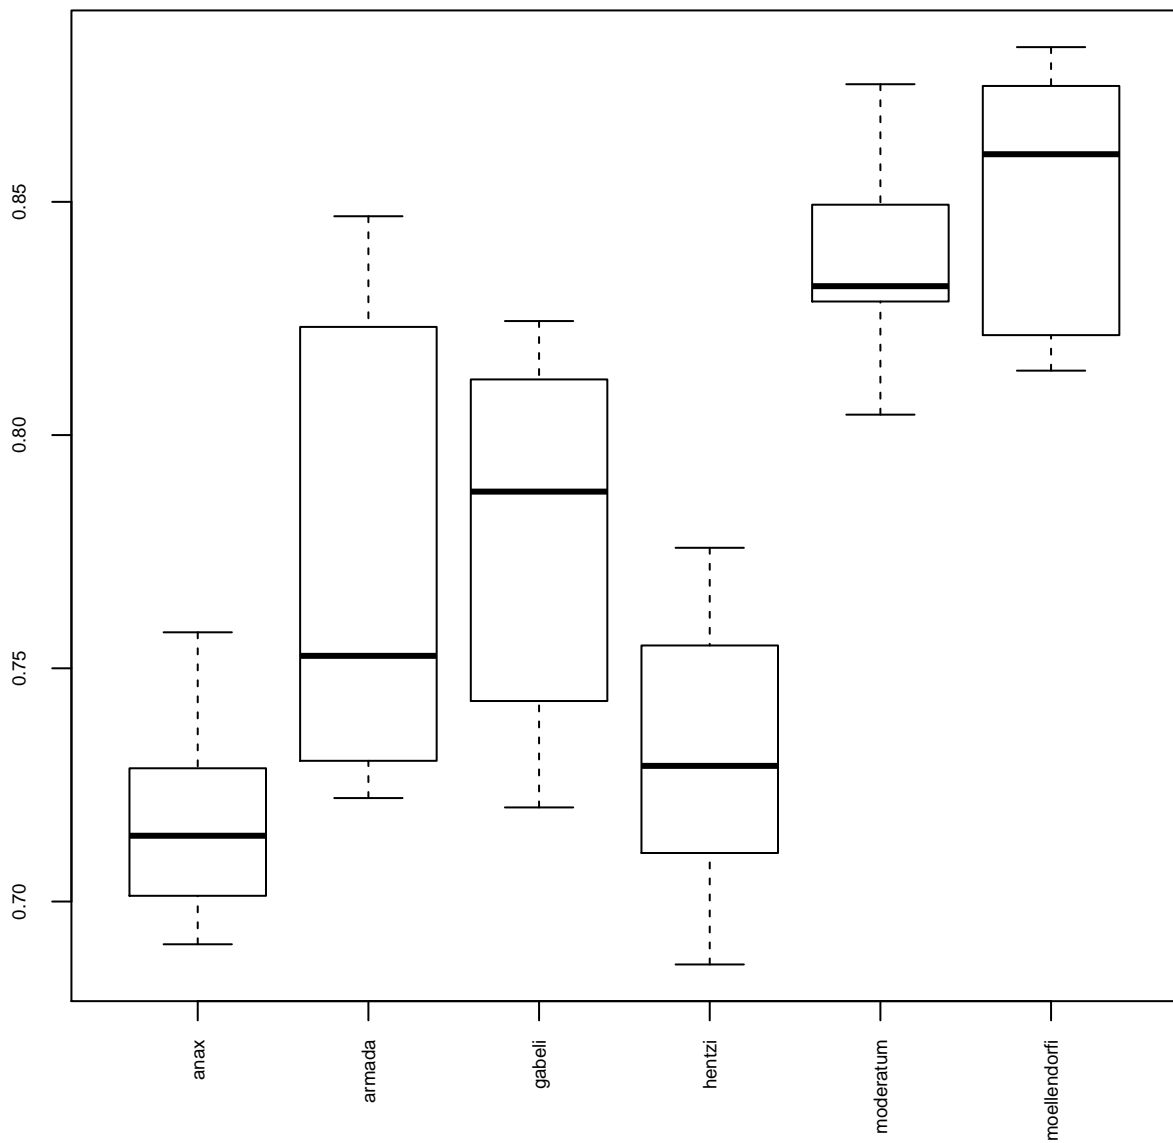

Supplement: Supplementary file 390

## Tibia 1/Metatarsus 3 Length ratio – females

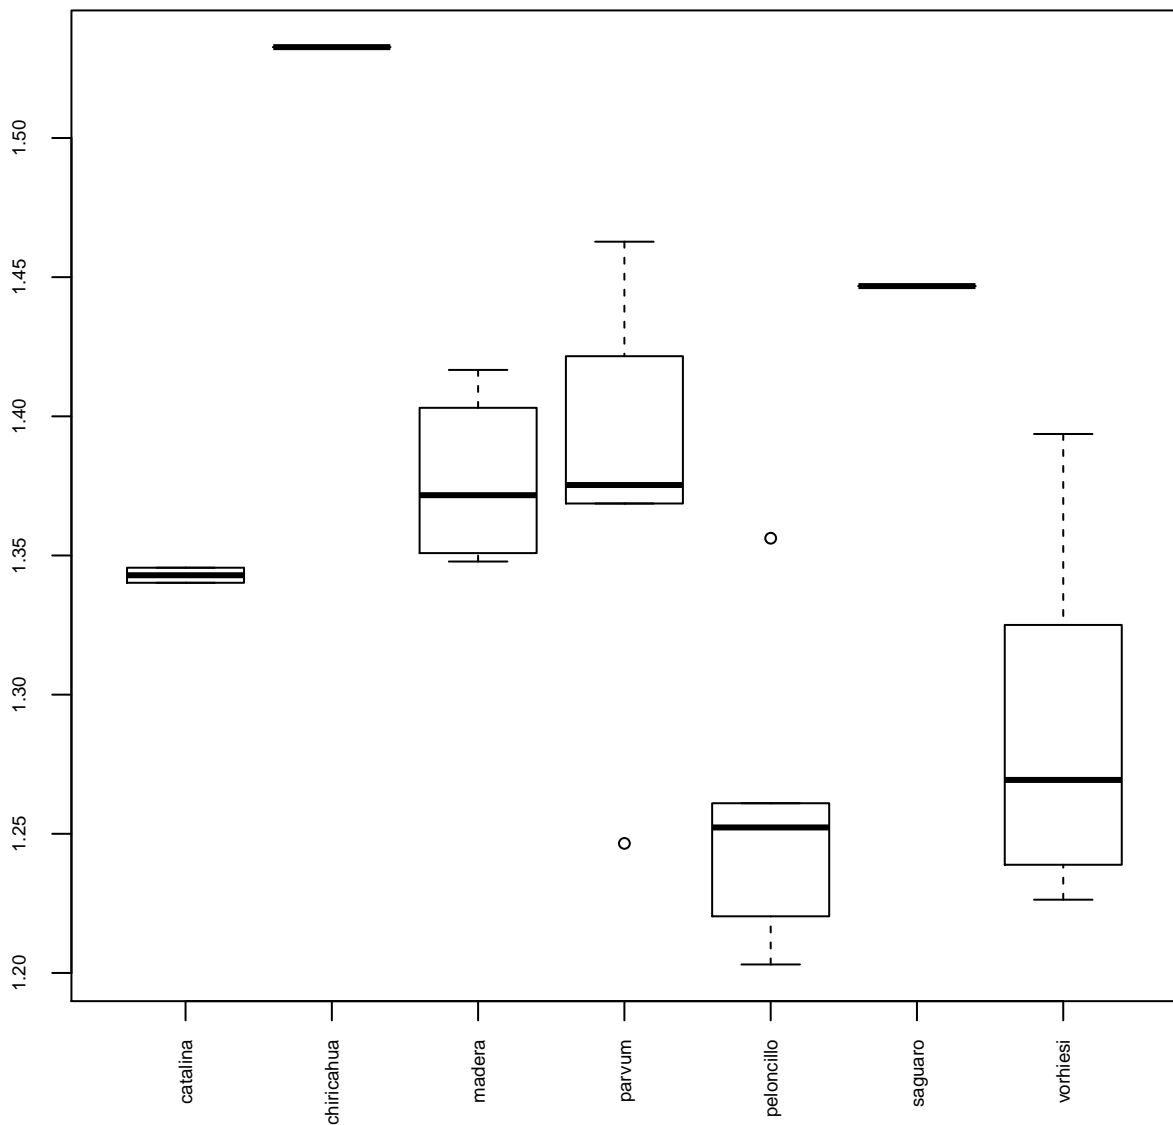

Supplement: Supplementary file 391

## Metatarsus 1/Metatarsus 3 ratio – males

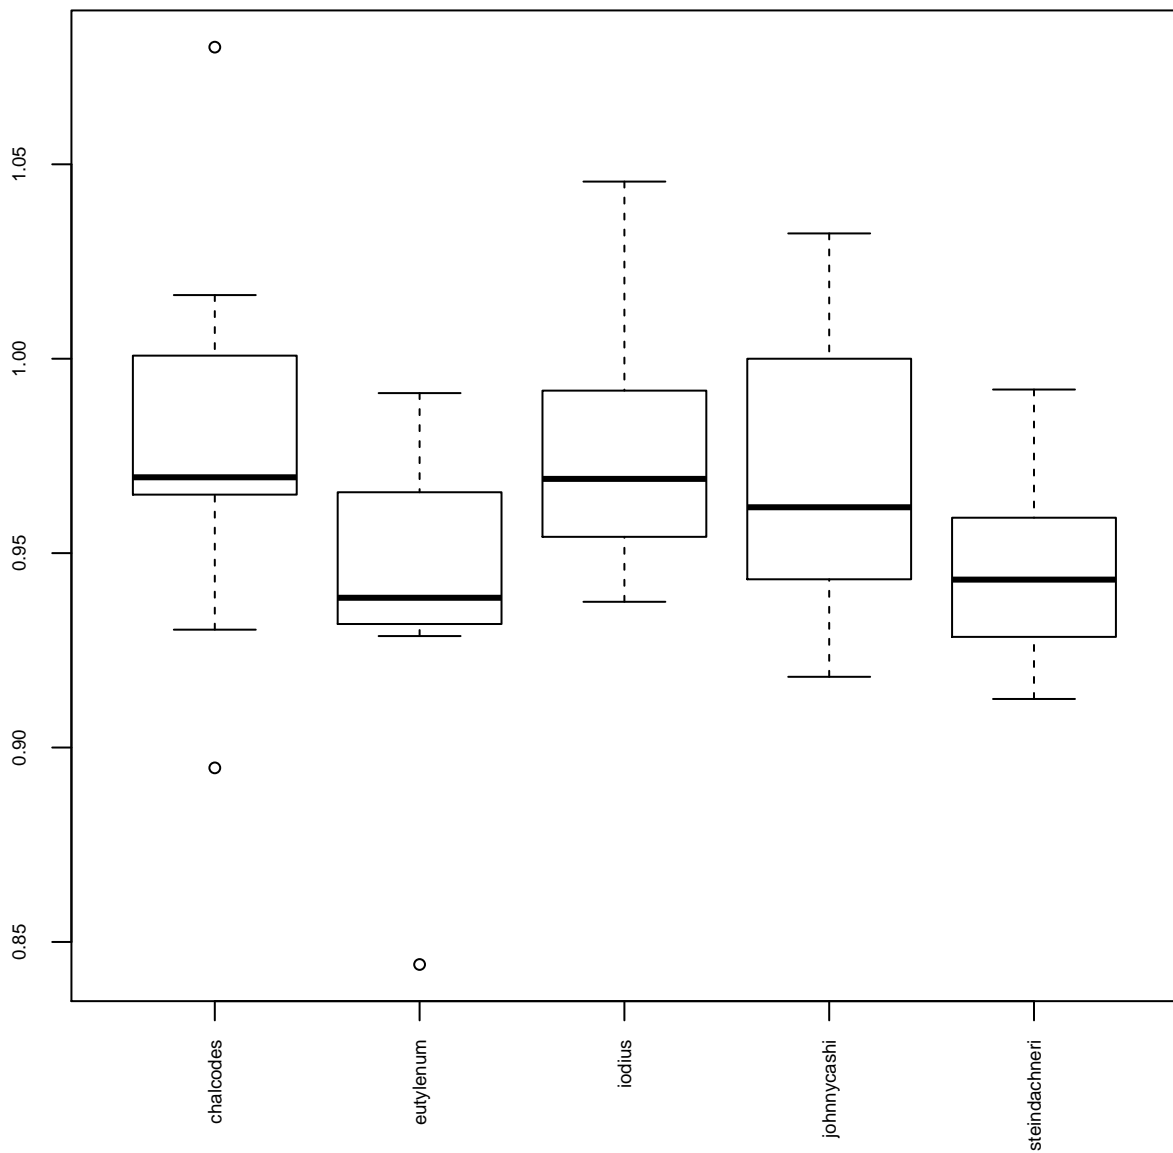

Supplement: Supplementary file 392

## Leg 4 Length/Carapace Length ratio – females

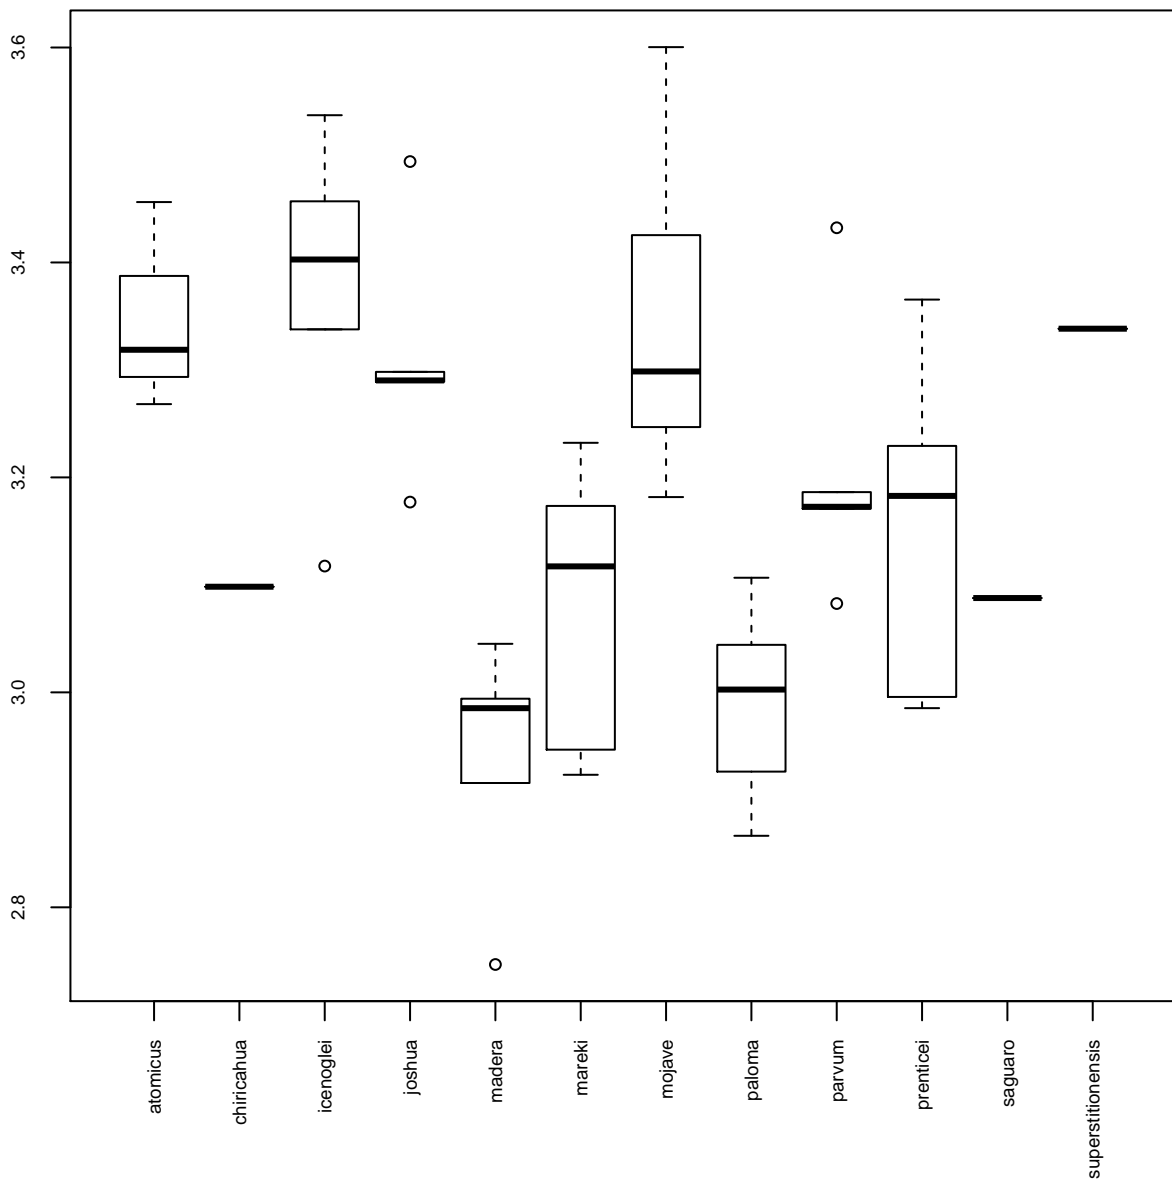

Supplement: Supplementary file 393

# Metatarsus 3/Tarsus 4 Length ratio – females

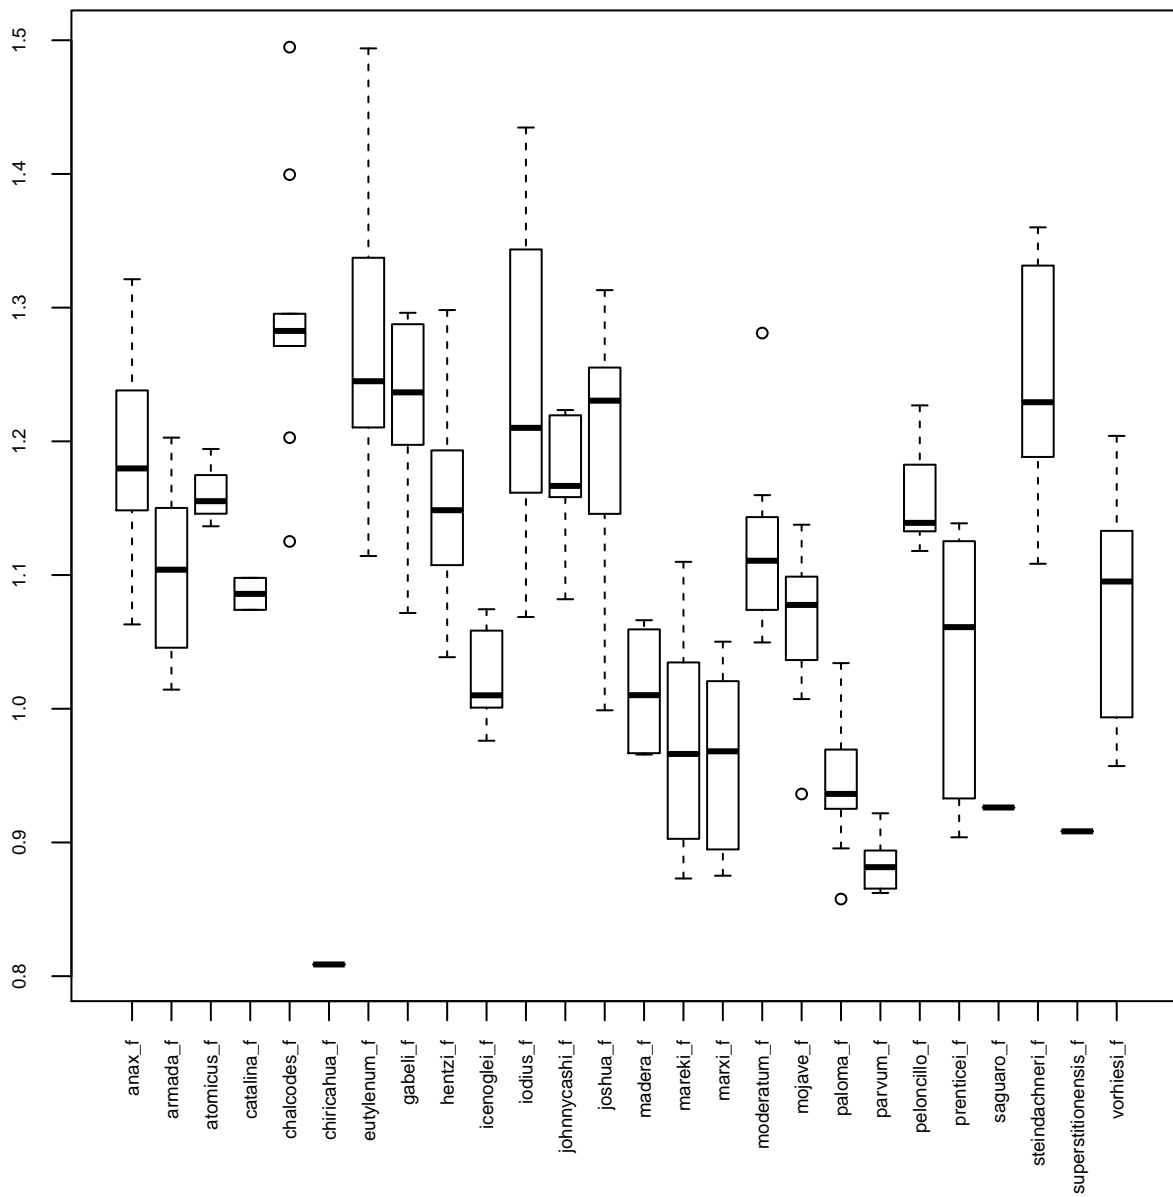

Supplement: Supplementary file 394

## Femur 3/Tarsus 4 Length ratio – males

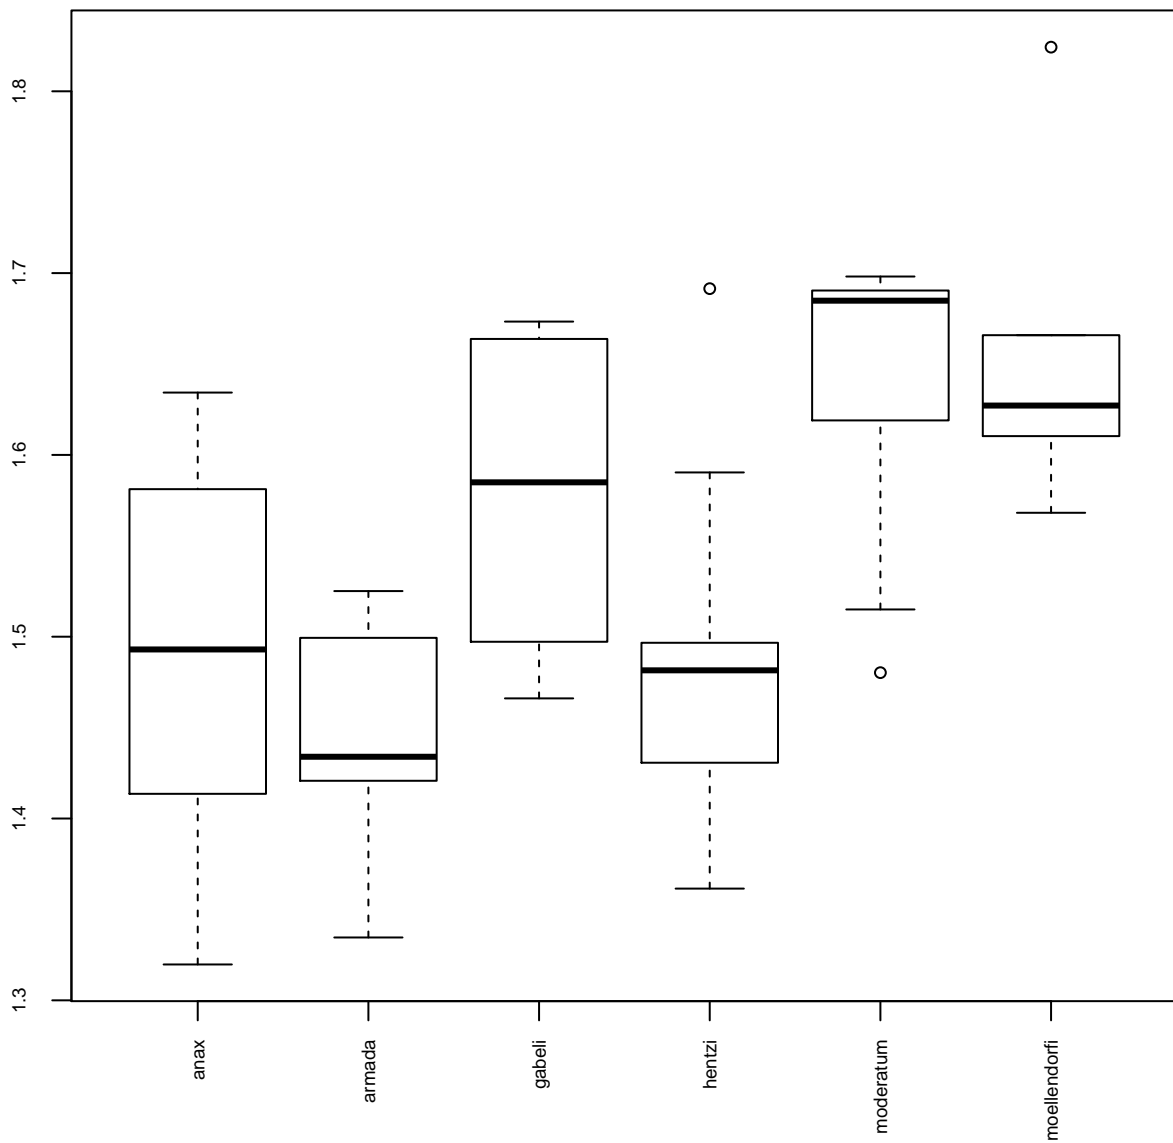

Supplement: Supplementary file 395

## Tibia 1/Metatarsus 4 Length ratio – females

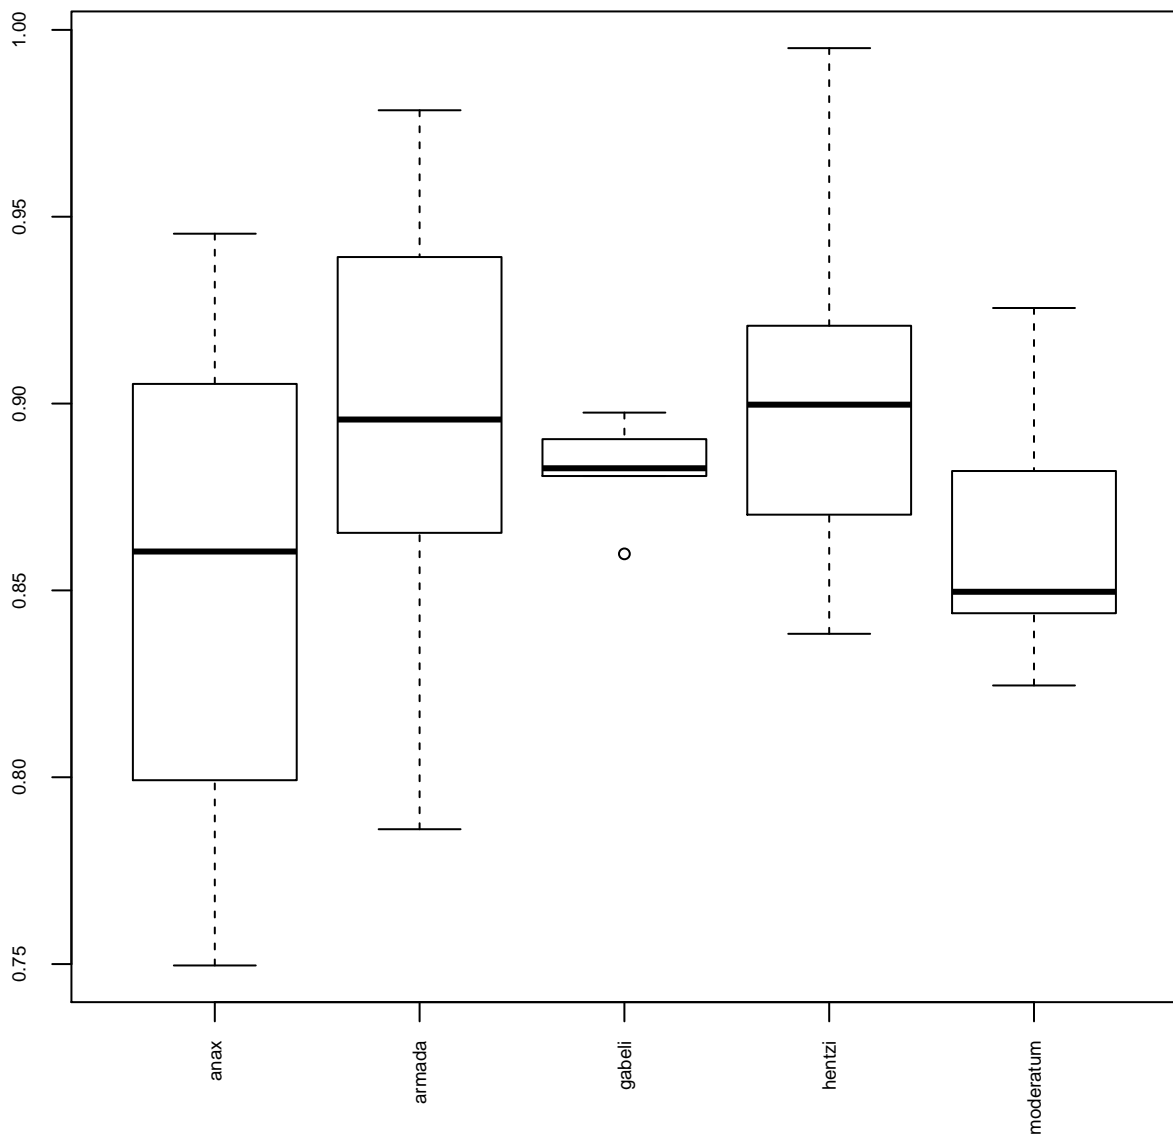

Supplement: Supplementary file 396

## Palpal Tibia/Femur 1 Length ratio – males

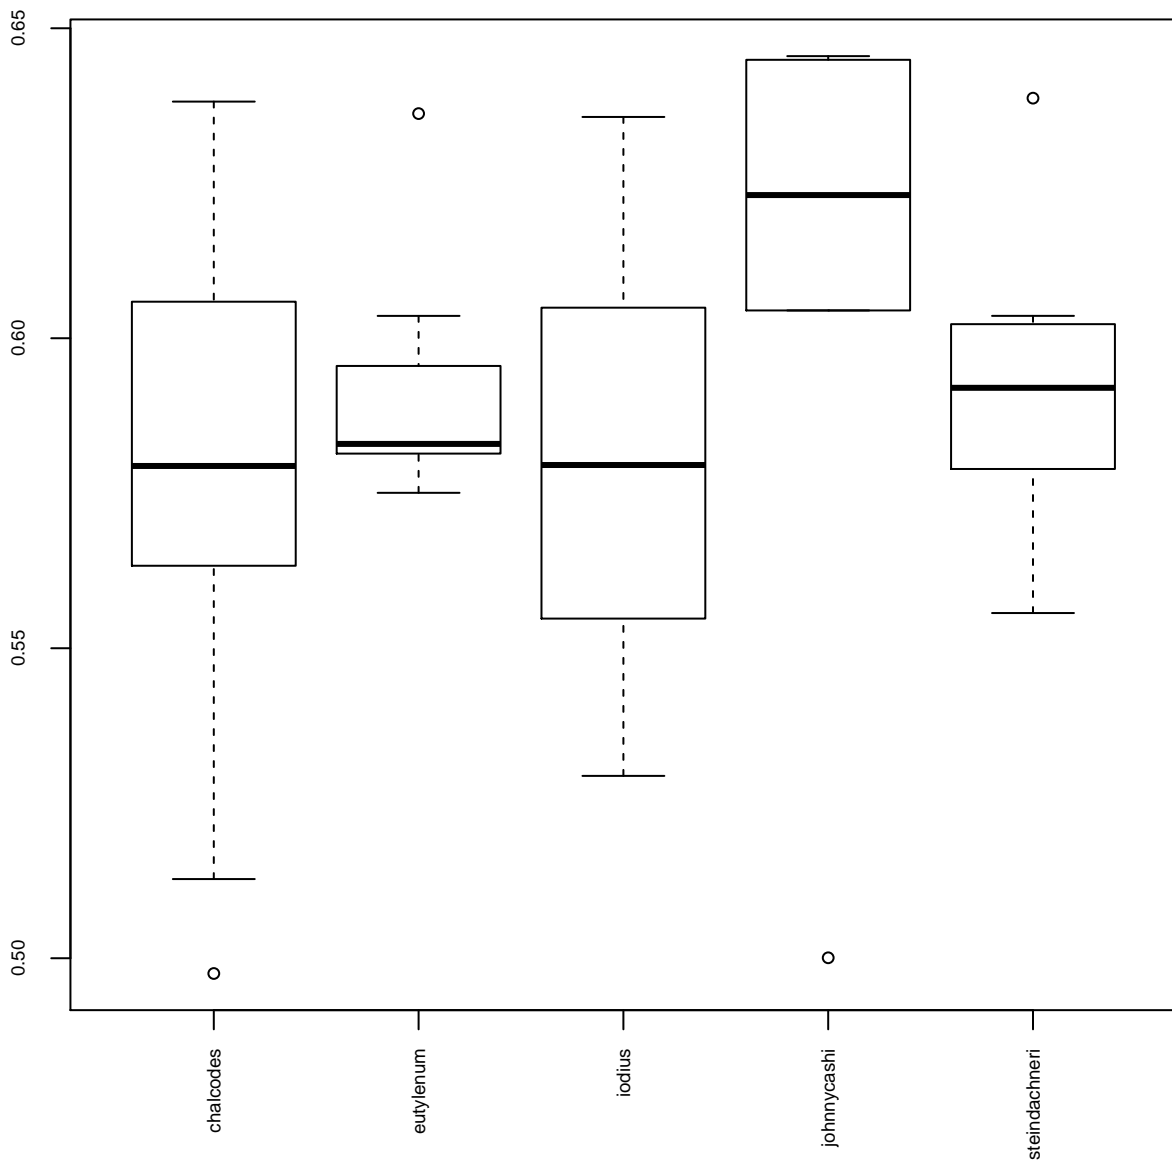

Supplement: Supplementary file 397

## Femur 4/Patella 4 ratio – males

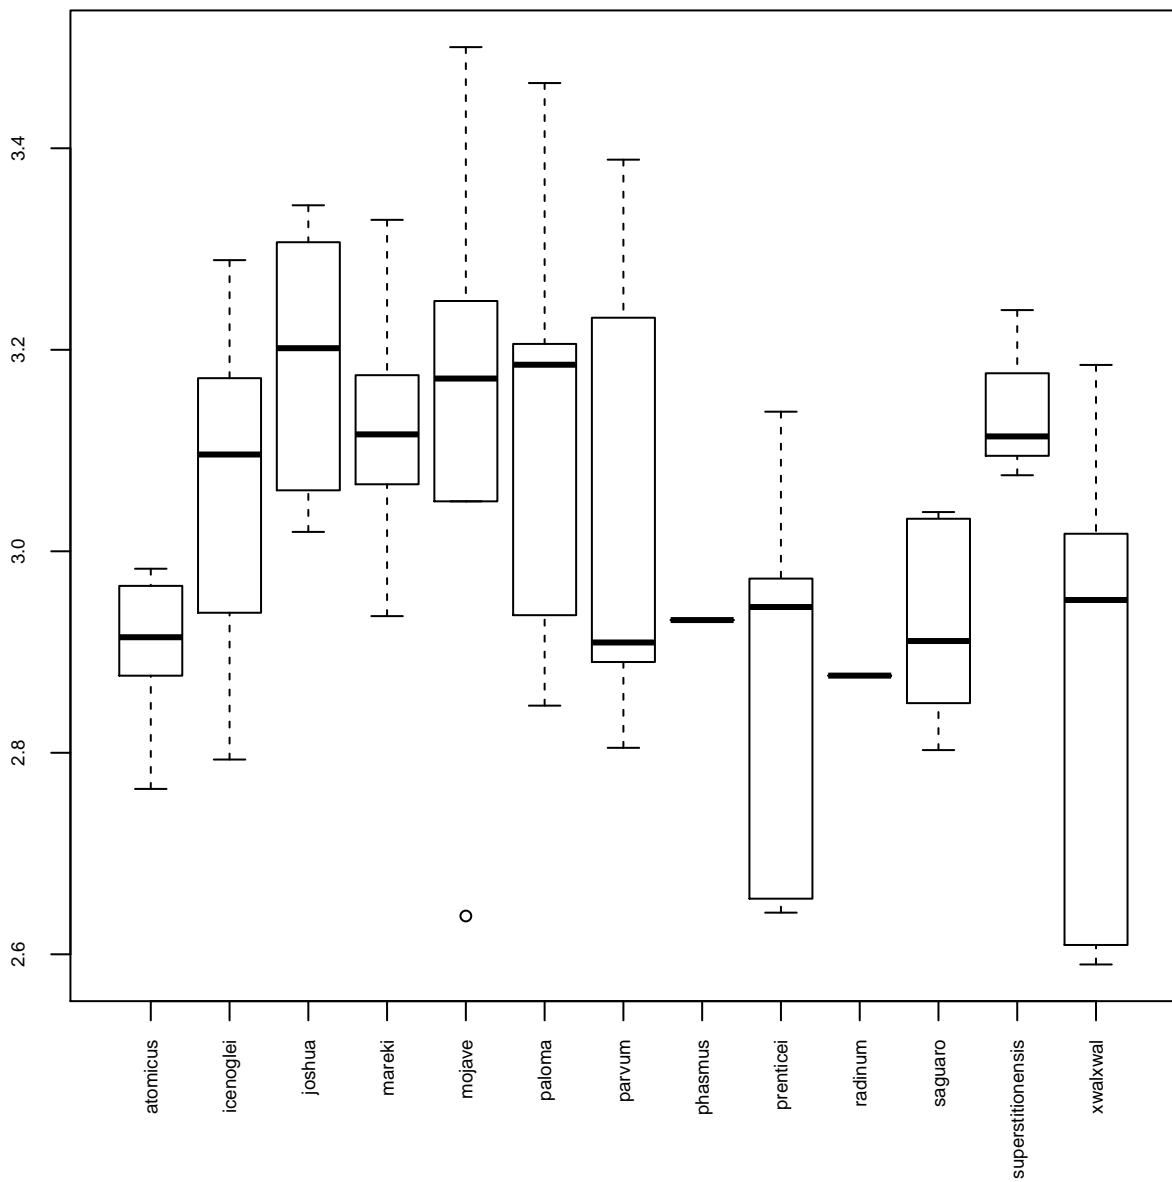

Supplement: Supplementary file 398

# Tibia 1/Patella 4 Length ratio – males

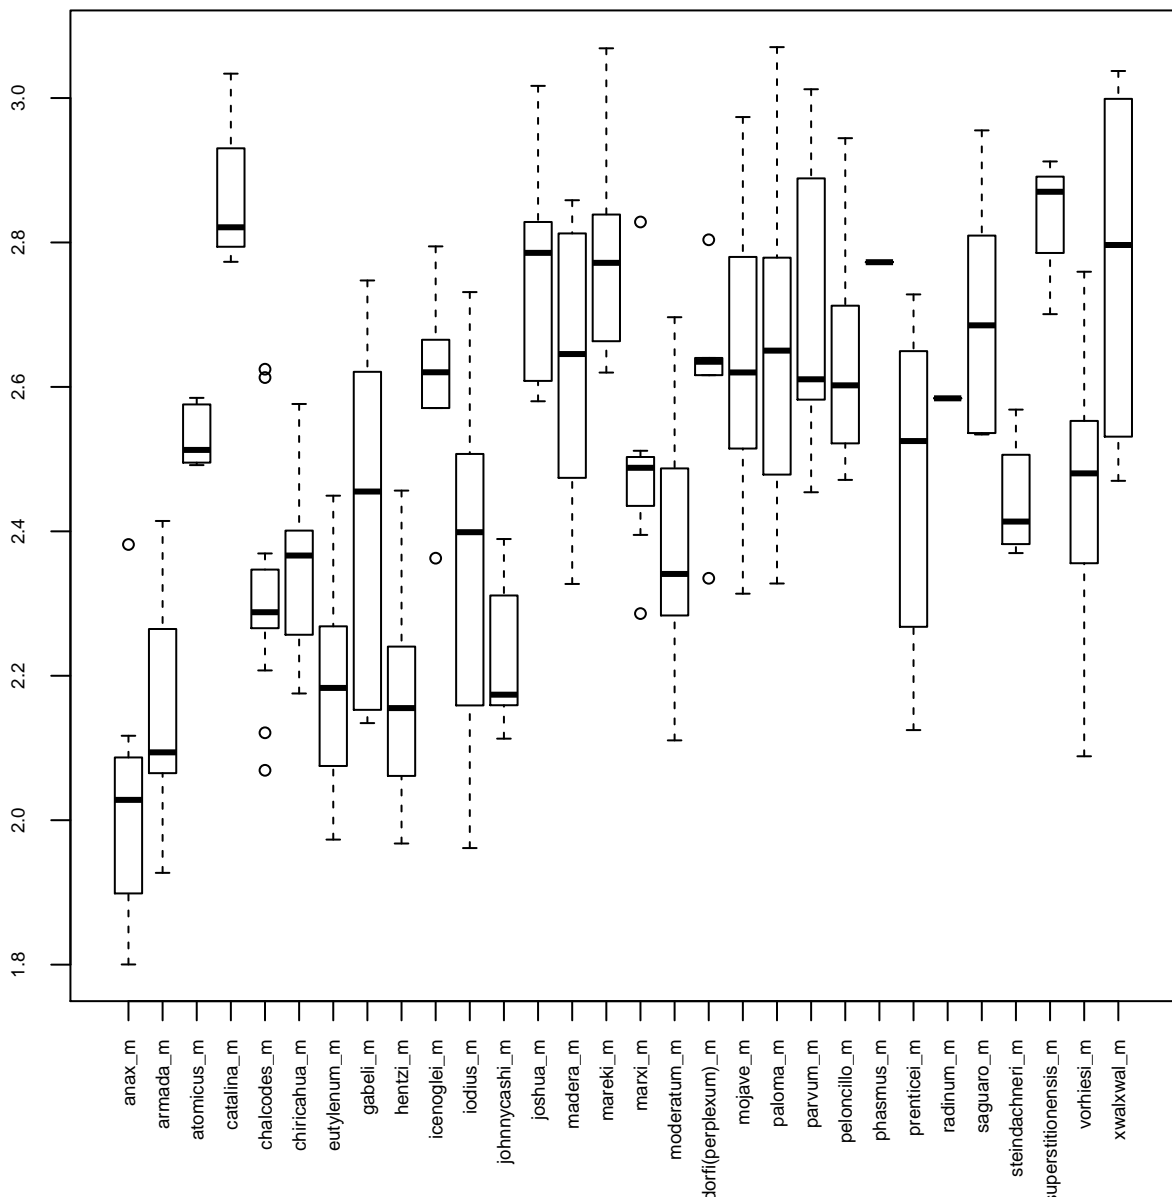

Supplement: Supplementary file 399

## Tarsus 1/Femur 3 Length ratio – males

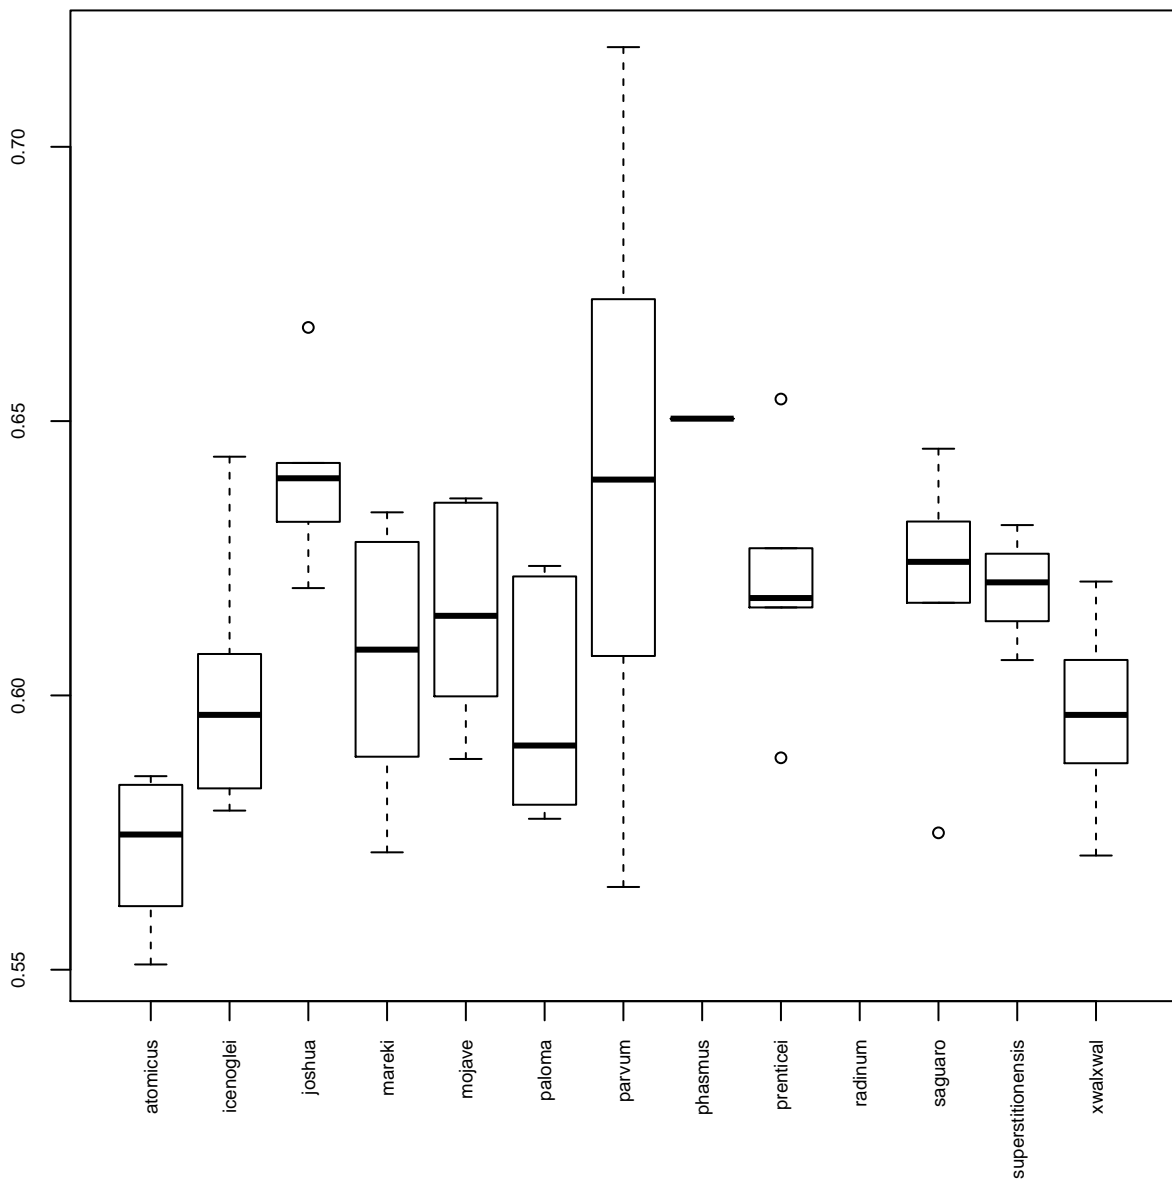

Supplement: Supplementary file 400
