# Supplementary material (part 5 of 15)
Source: publisher site journal article supplement (http://zookeys.pensoft.net/article/6264/download/suppl/32/)

## Femur 1/Tarsus 3 ratio – males

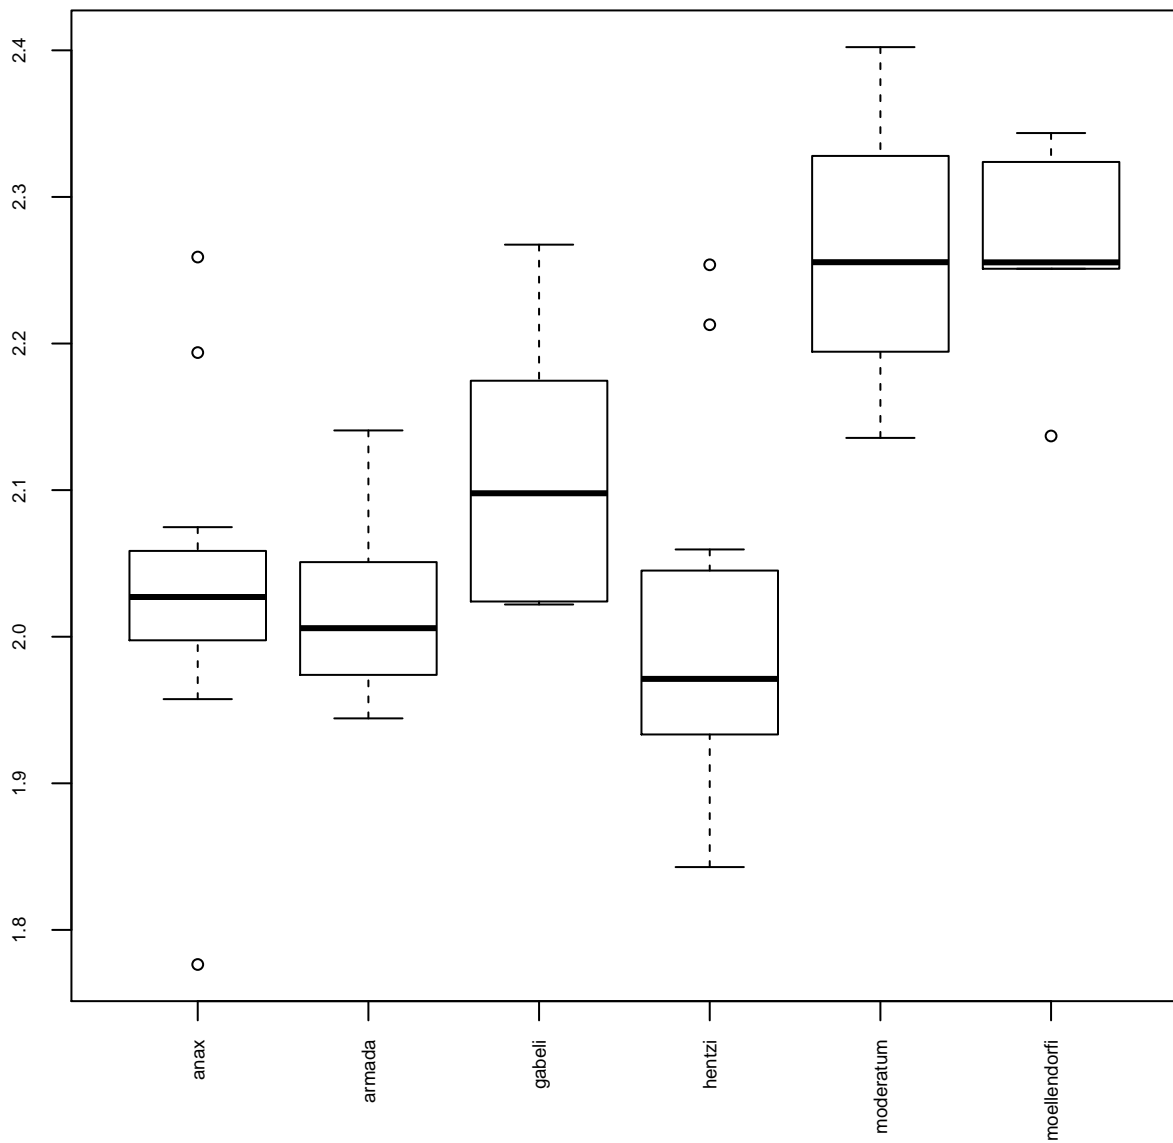

Supplement: Supplementary file 401

## Carapace Length/Patella 4 ratio – males

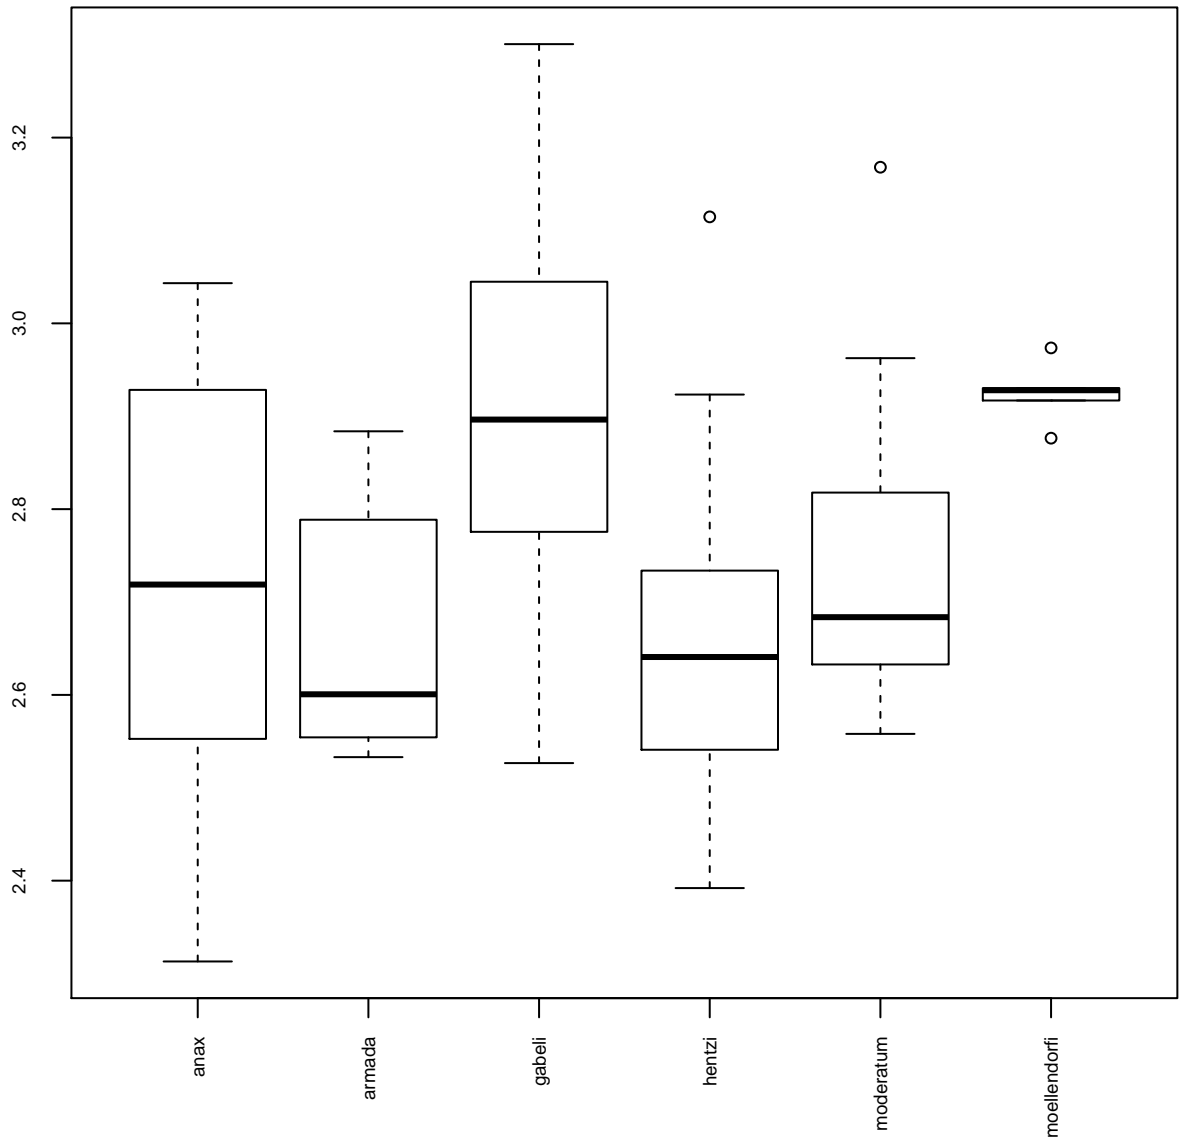

Supplement: Supplementary file 402

## Tibia 1/Femur 3 Length ratio – males

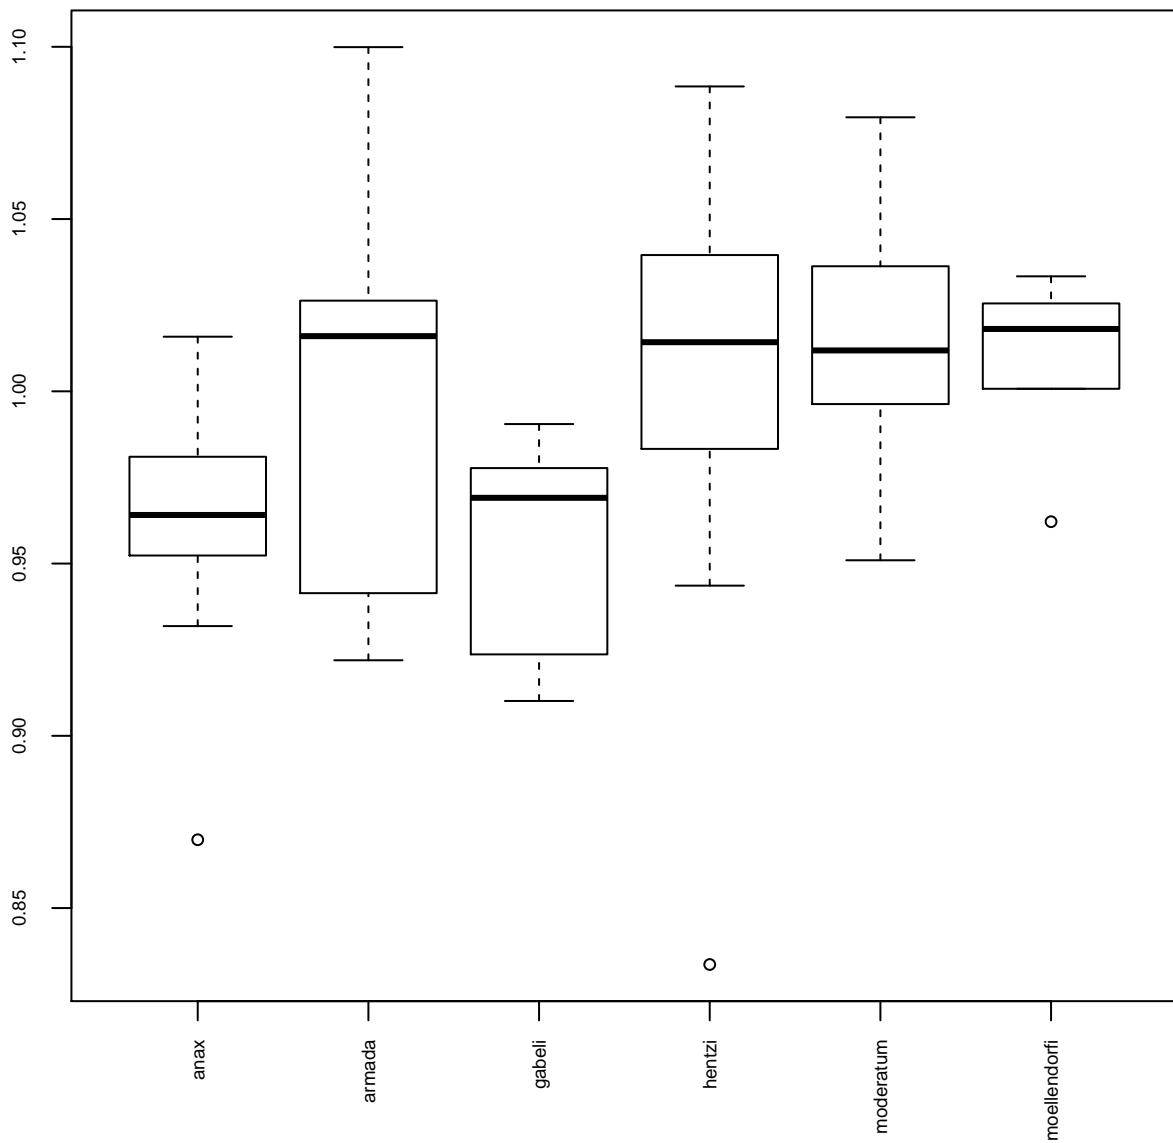

Supplement: Supplementary file 403

## Femur 4 Length/Width ratio – females

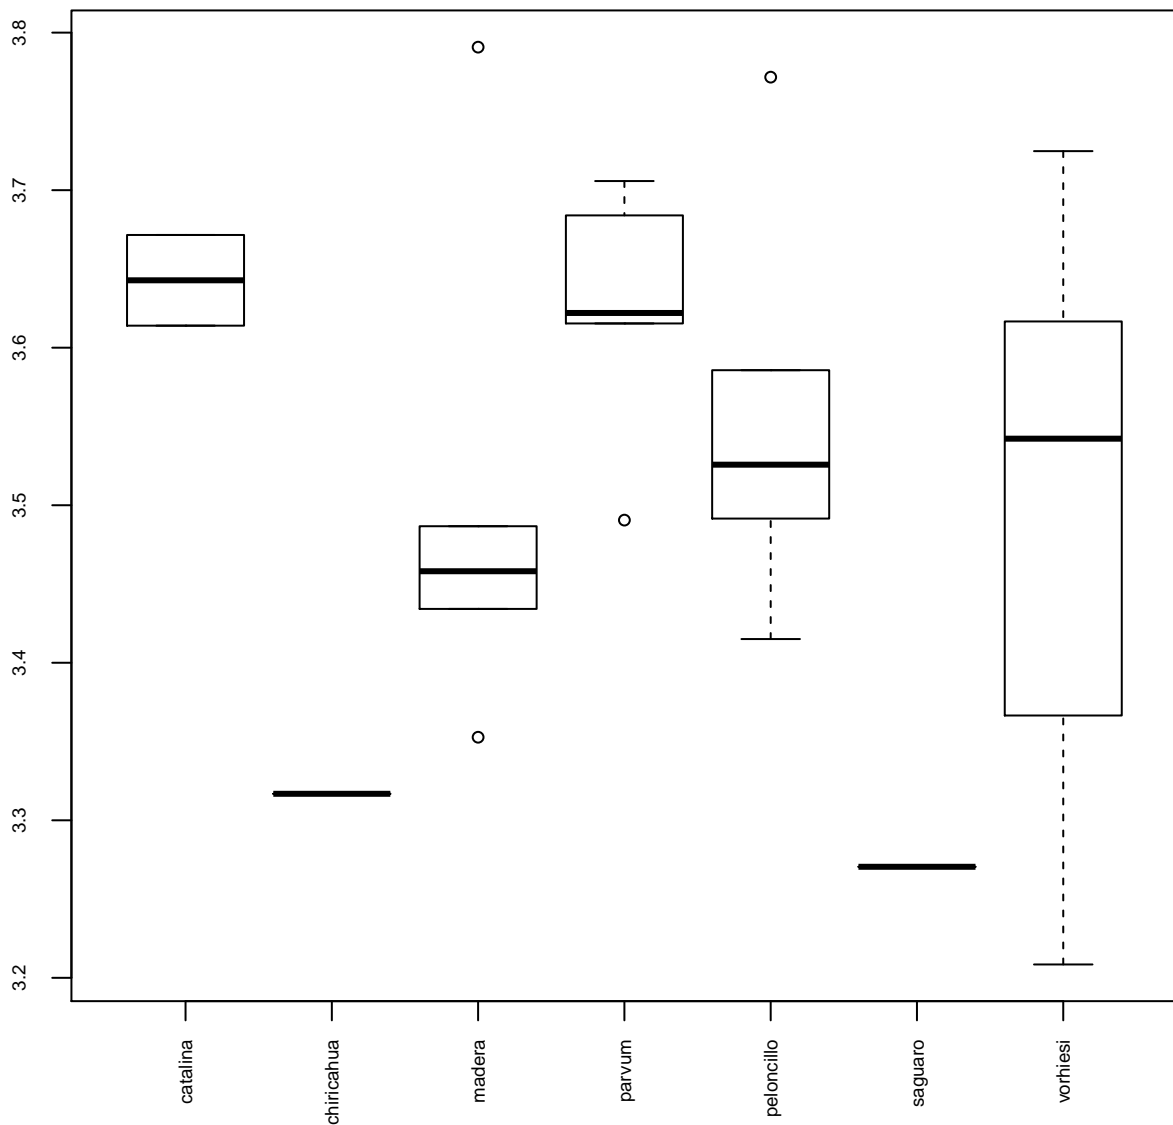

Supplement: Supplementary file 404

Palpal Tibia/Patella 3 Length ratio – males

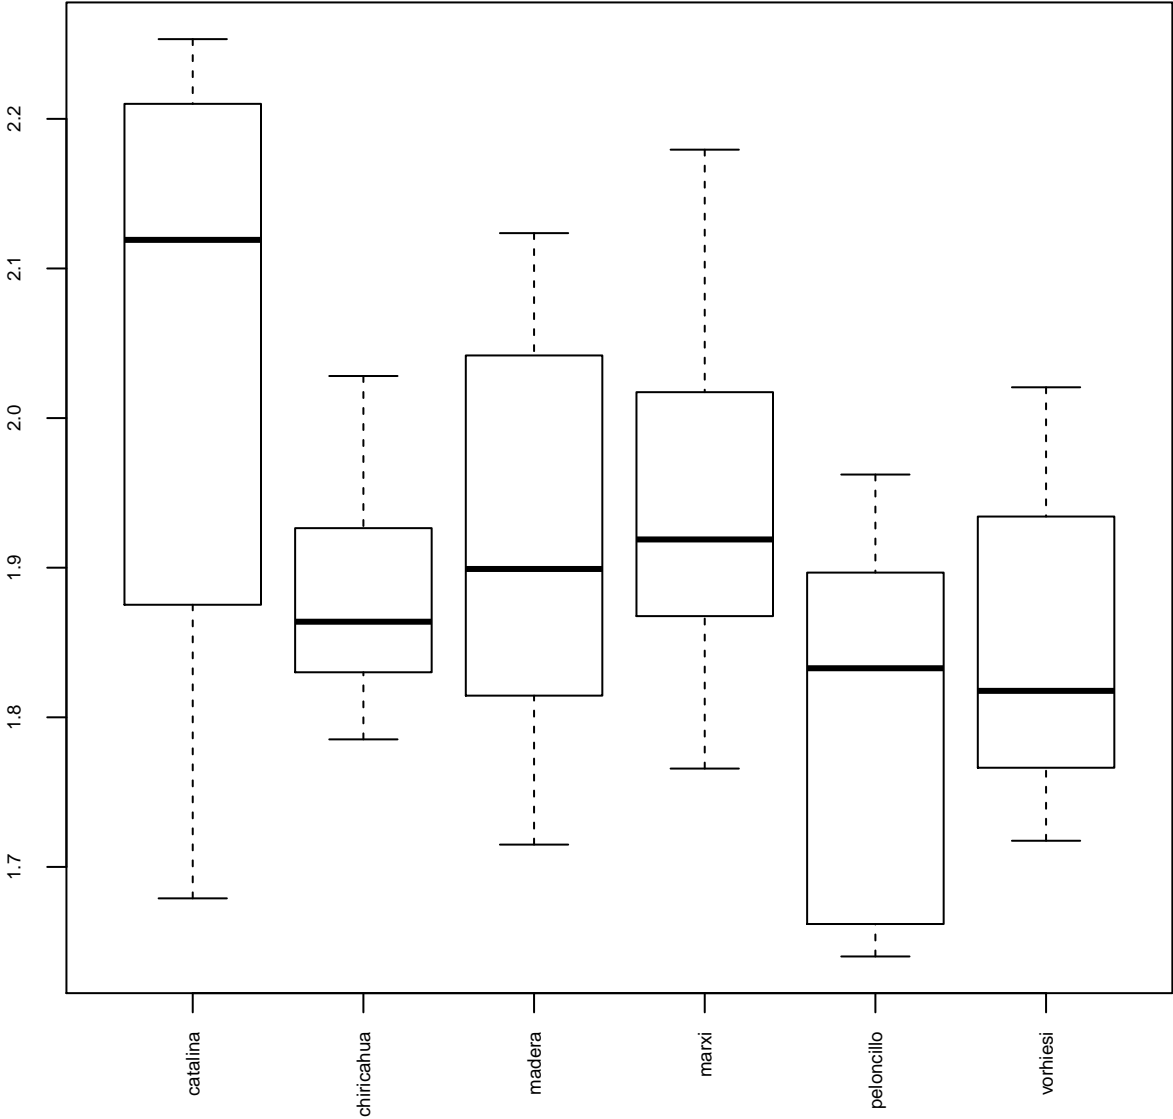

Supplement: Supplementary file 405

## Leg 3 Length/Carapace Length ratio – males

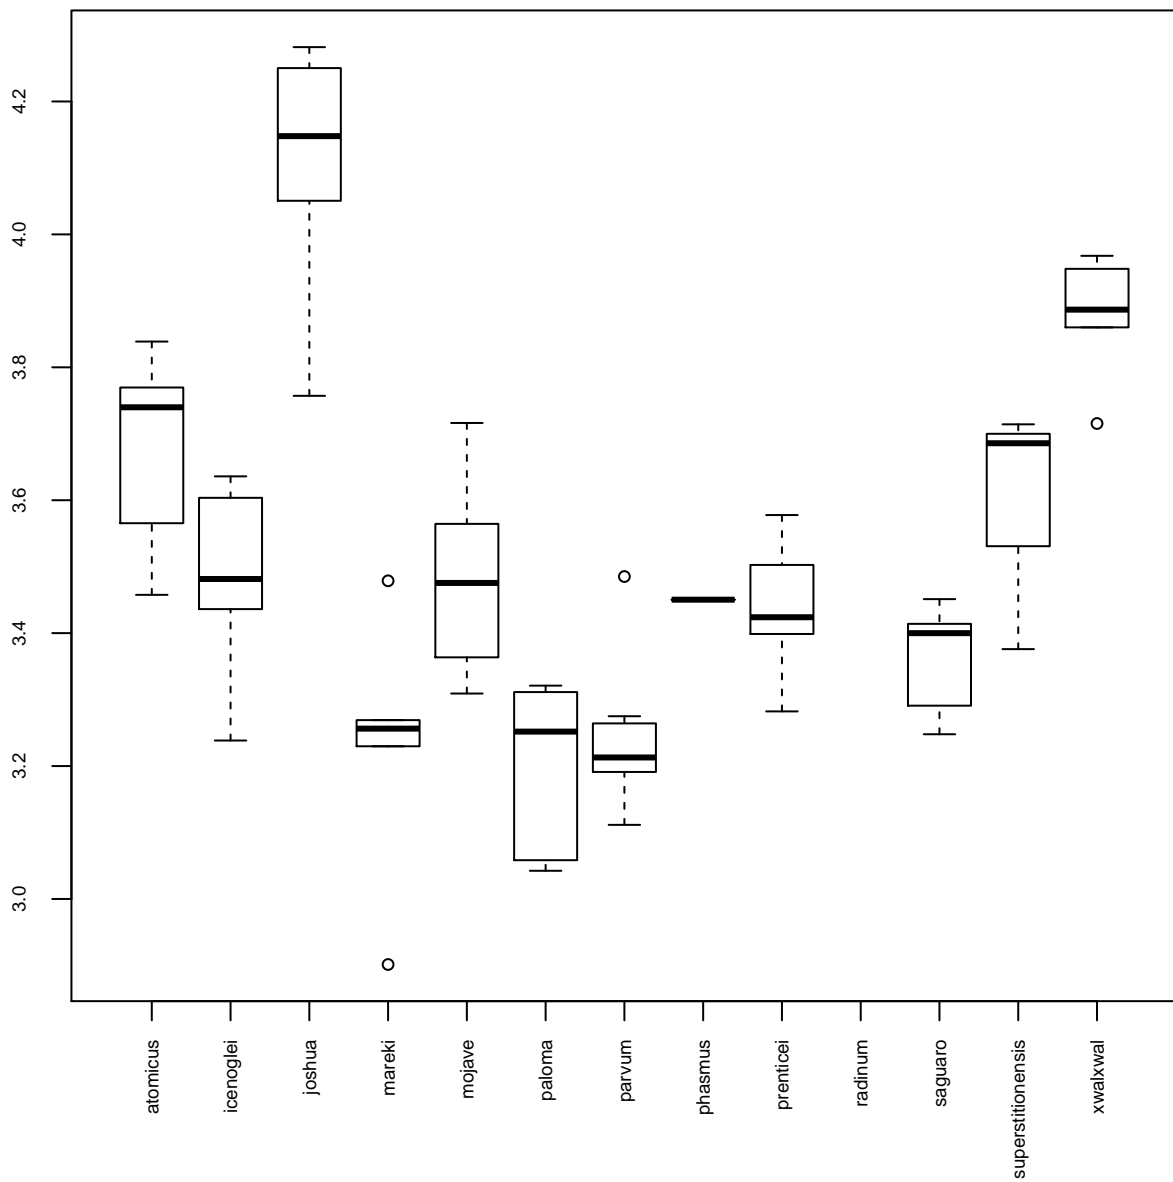

Supplement: Supplementary file 406

## Tarsus 1/Patella 3 Length ratio – males

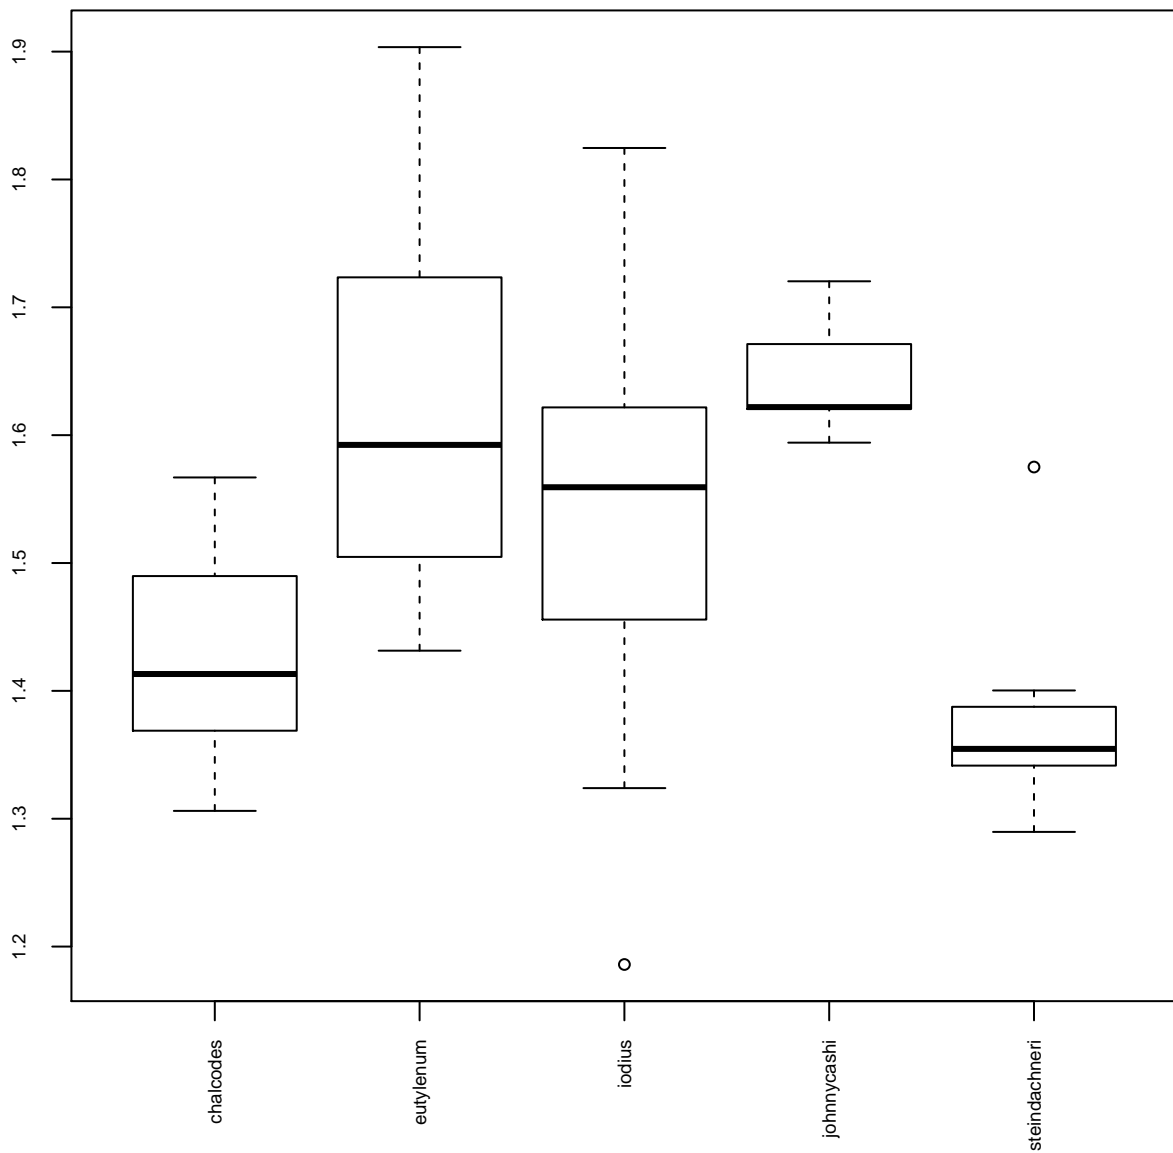

Supplement: Supplementary file 407

Palpal Tibia/Patella 4 Length ratio – males

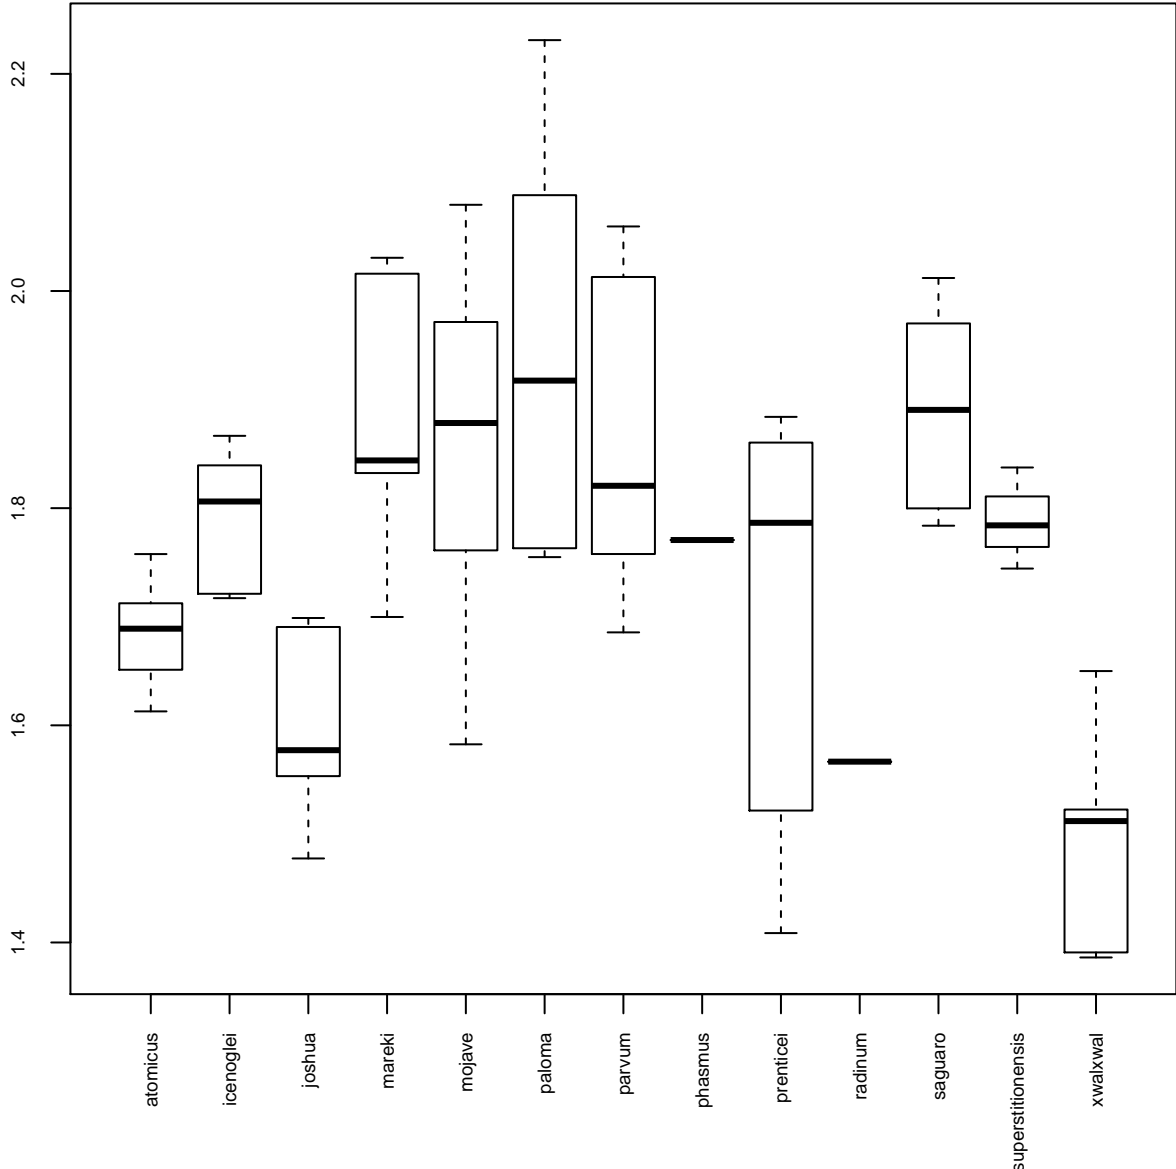

Supplement: Supplementary file 408

# Femur 1/Metatarsus 3 ratio – males

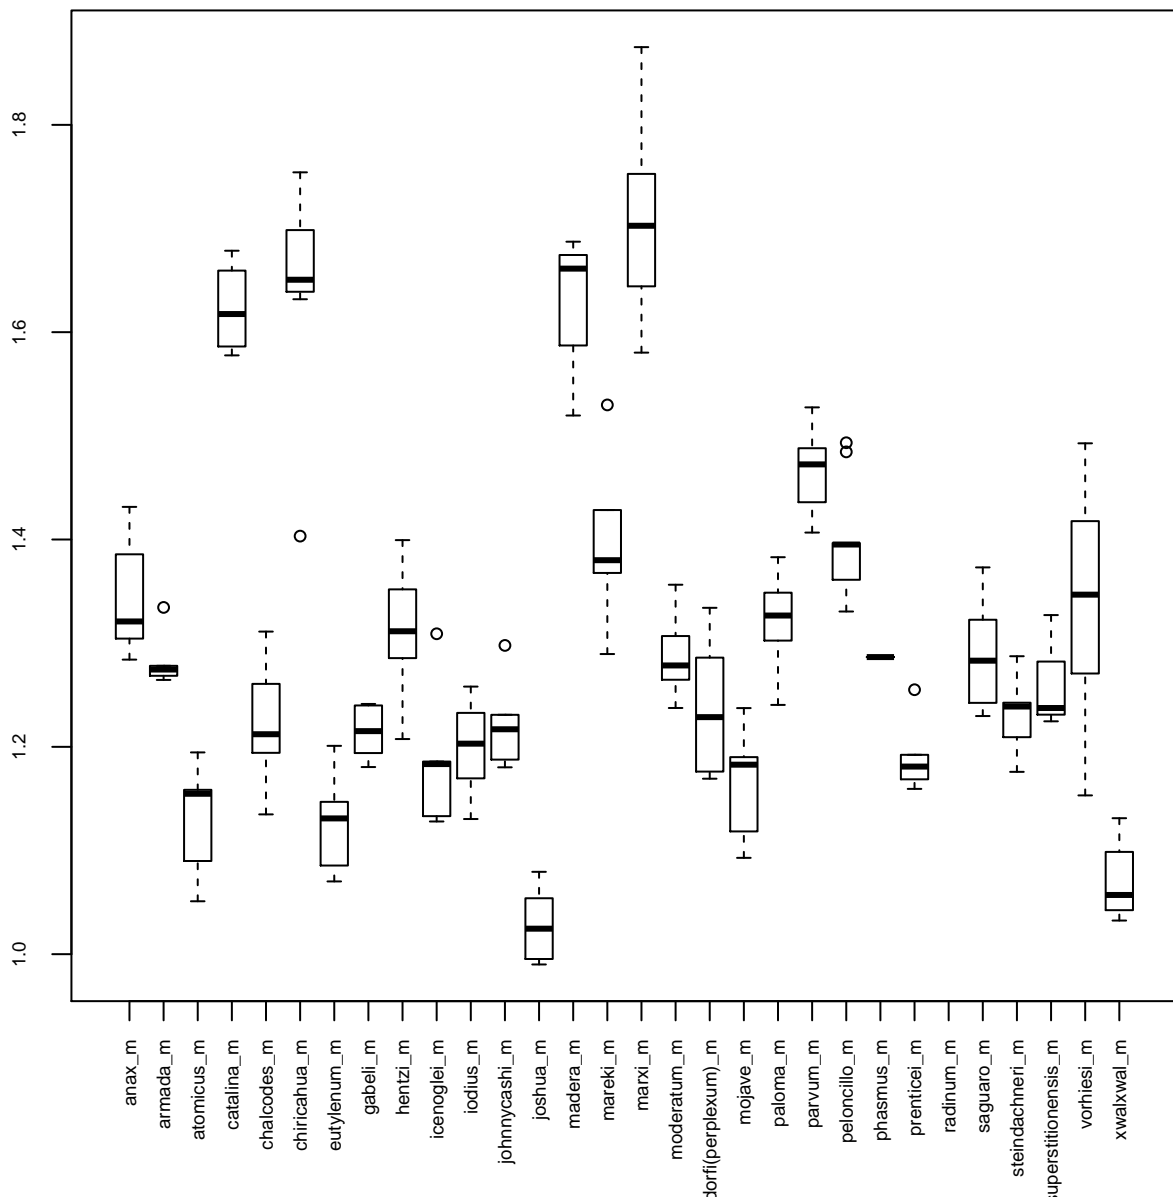

Supplement: Supplementary file 409

## Femur 4/Patella 4 ratio – males

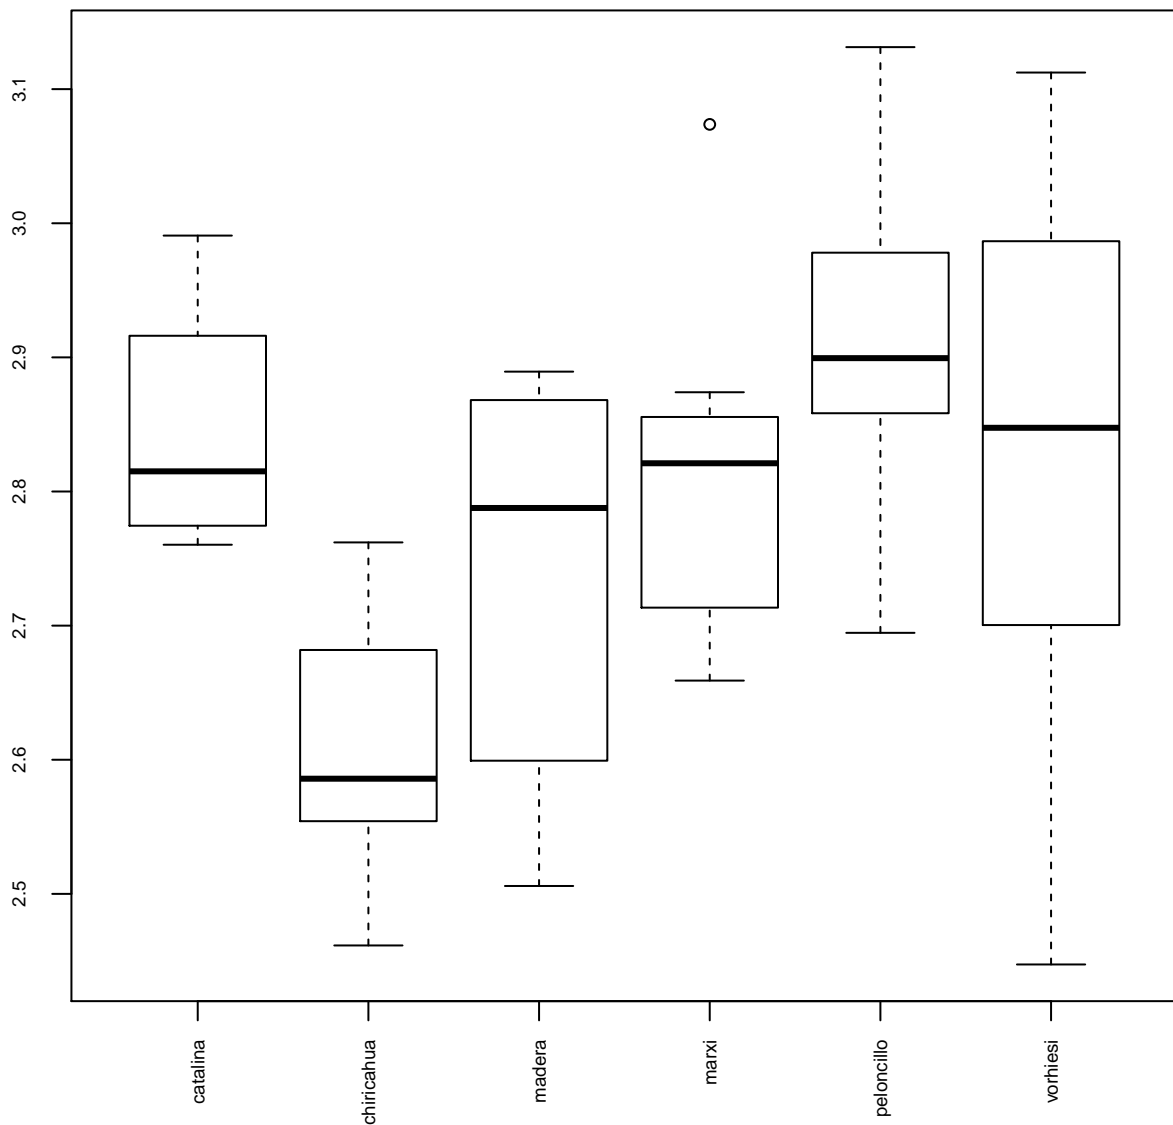

Supplement: Supplementary file 410

## Leg 1 Length/Carapace Length ratio – males

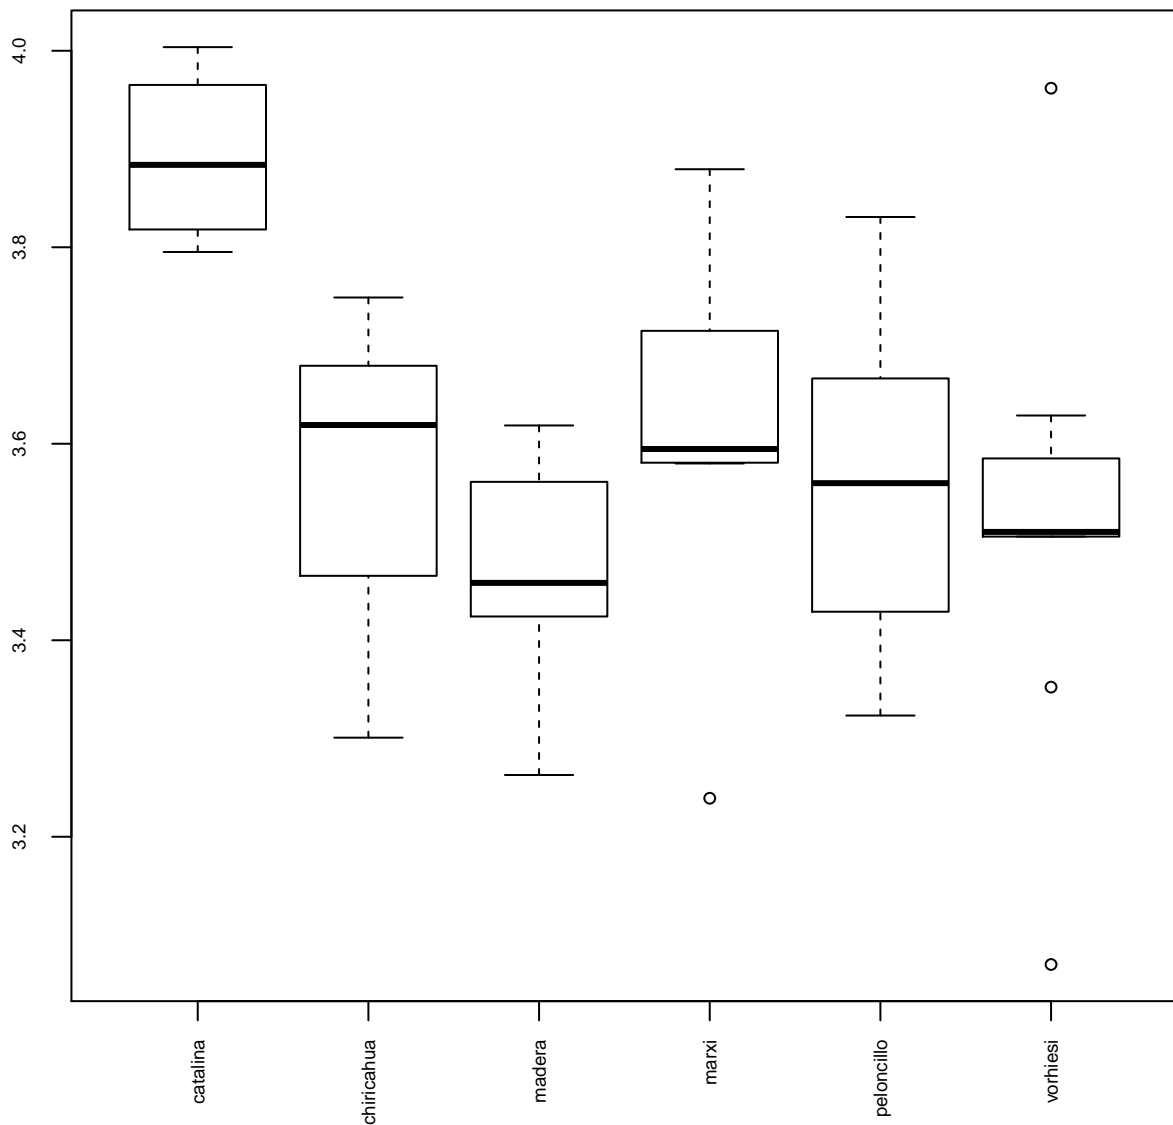

Supplement: Supplementary file 411

## Tibia 3/Tarsus 4 Length ratio – males

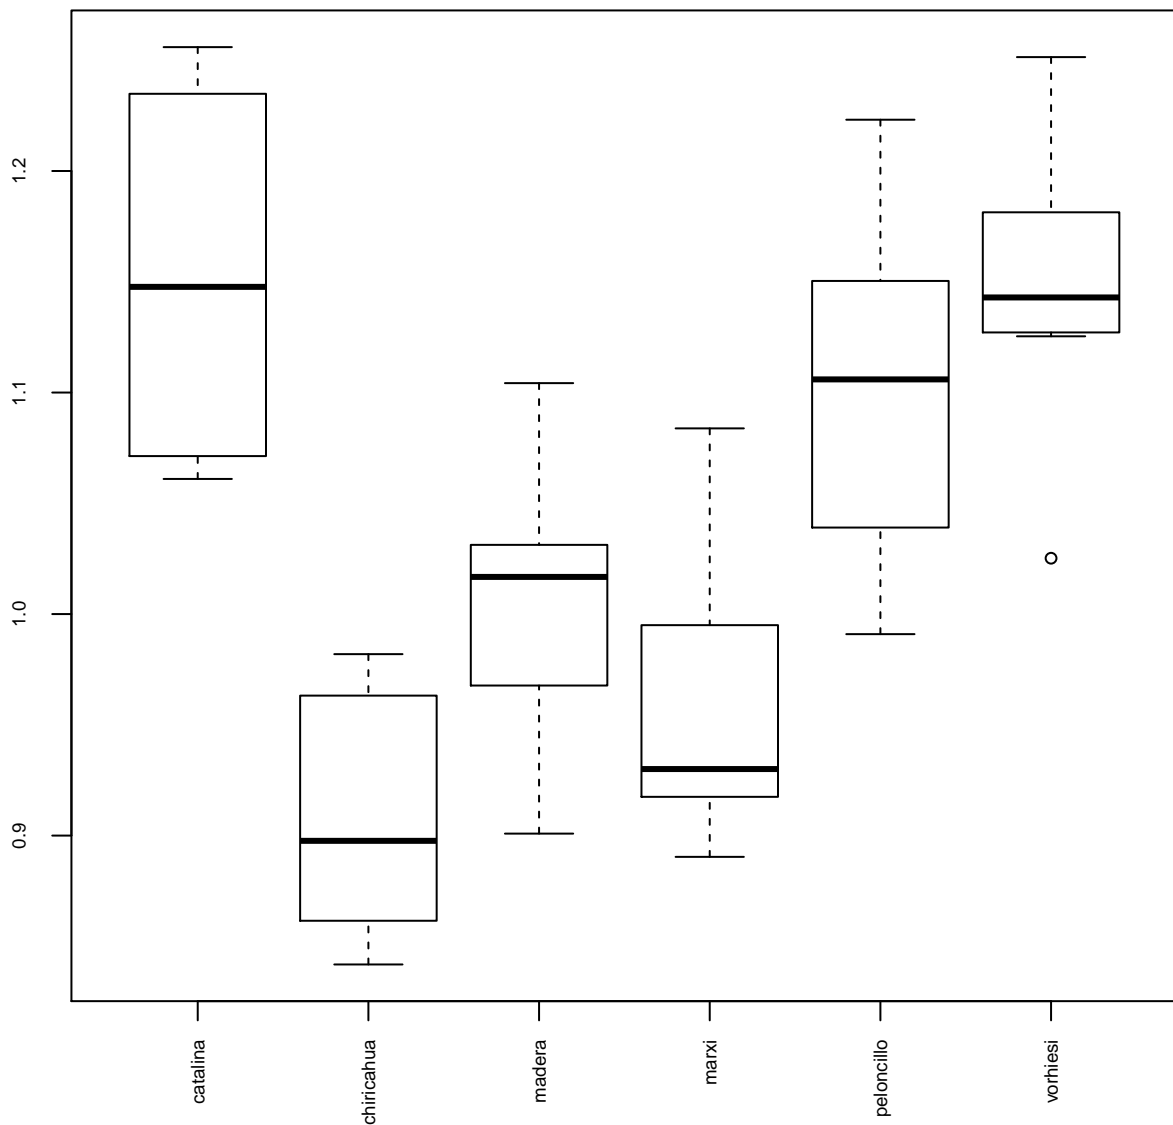

Supplement: Supplementary file 412

## Femur 1/Tarsus 1 ratio – females

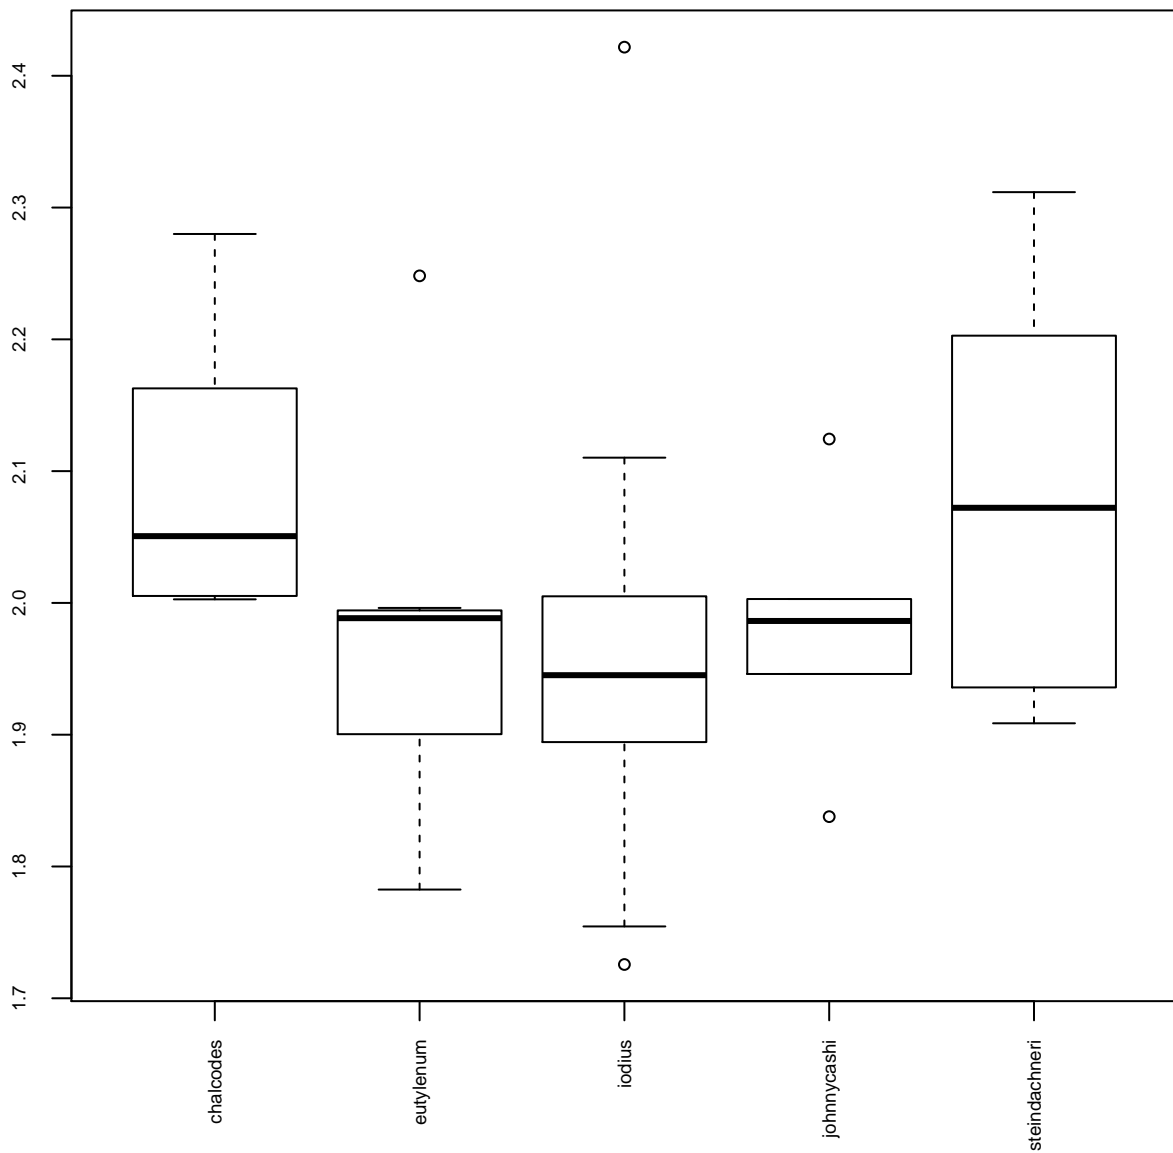

Supplement: Supplementary file 413

## Patella 3/Metatarsus 4 Length ratio – females

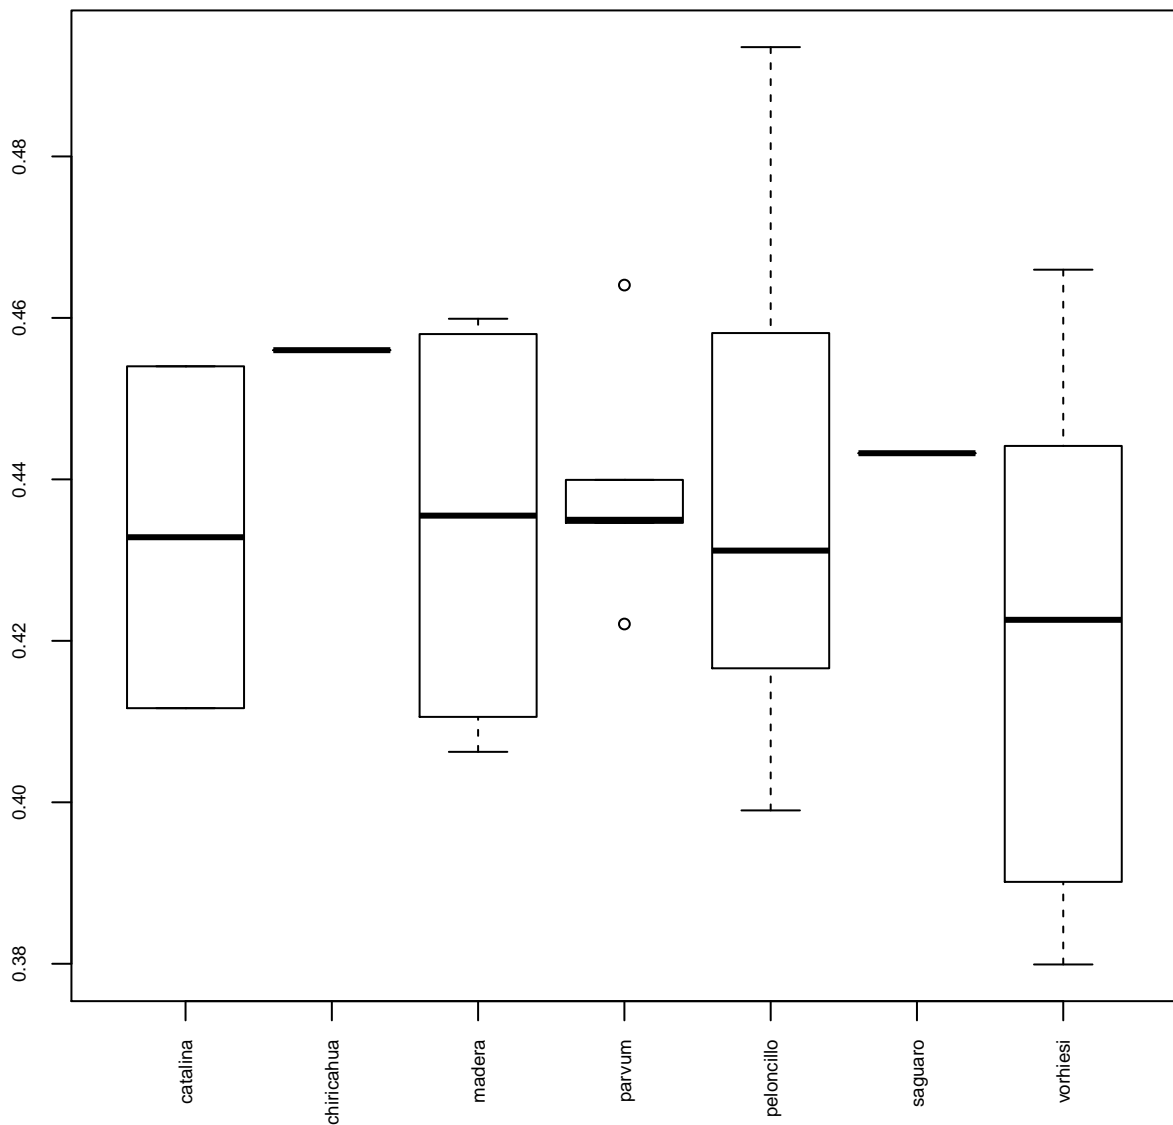

Supplement: Supplementary file 414

## Leg 1 Length – males

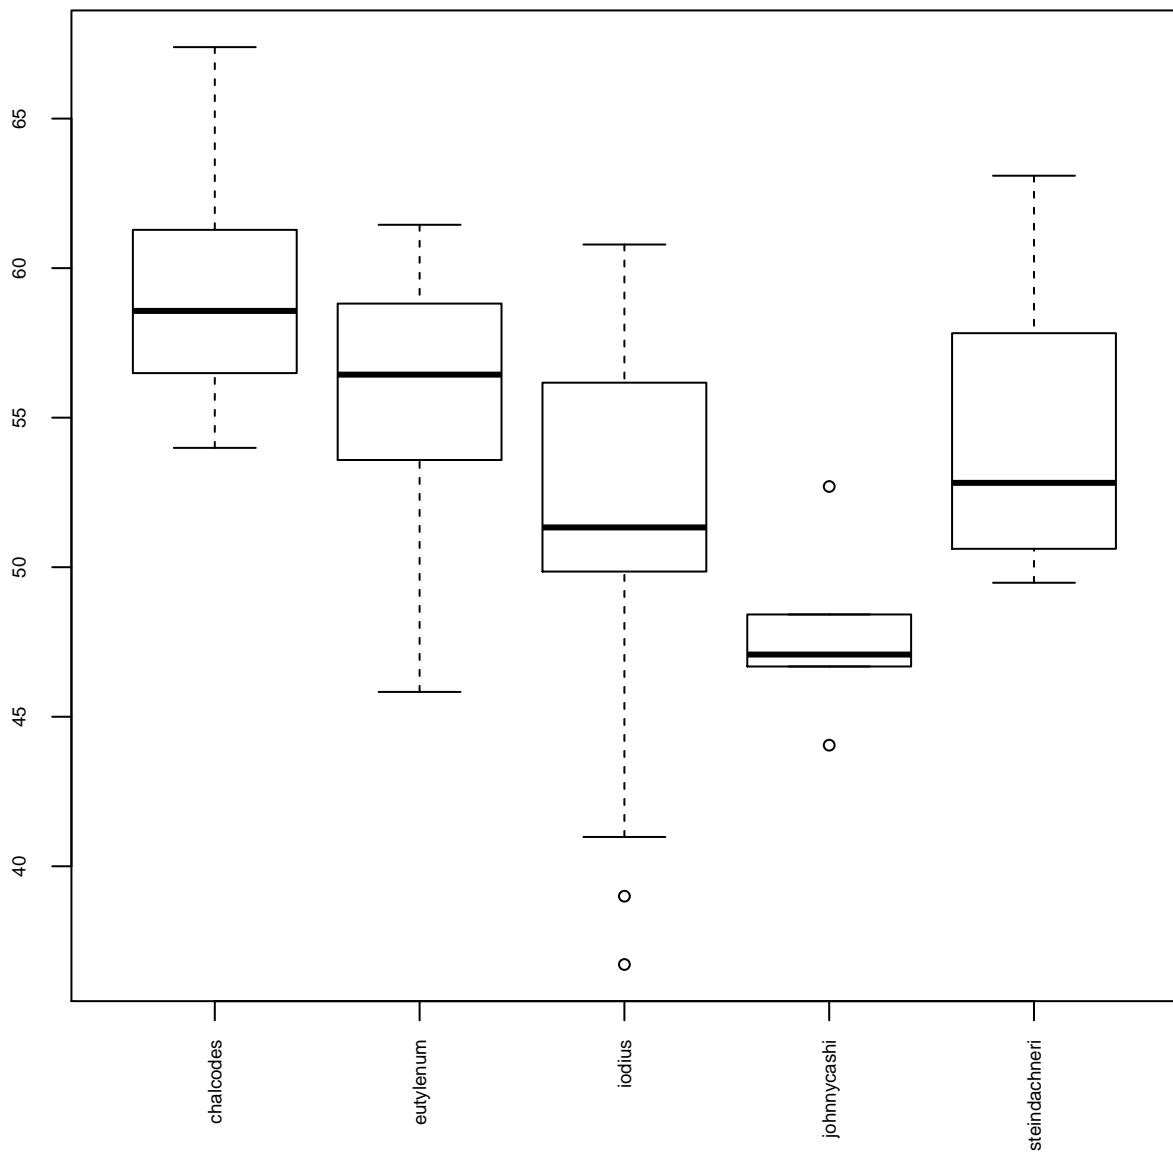

Supplement: Supplementary file 415

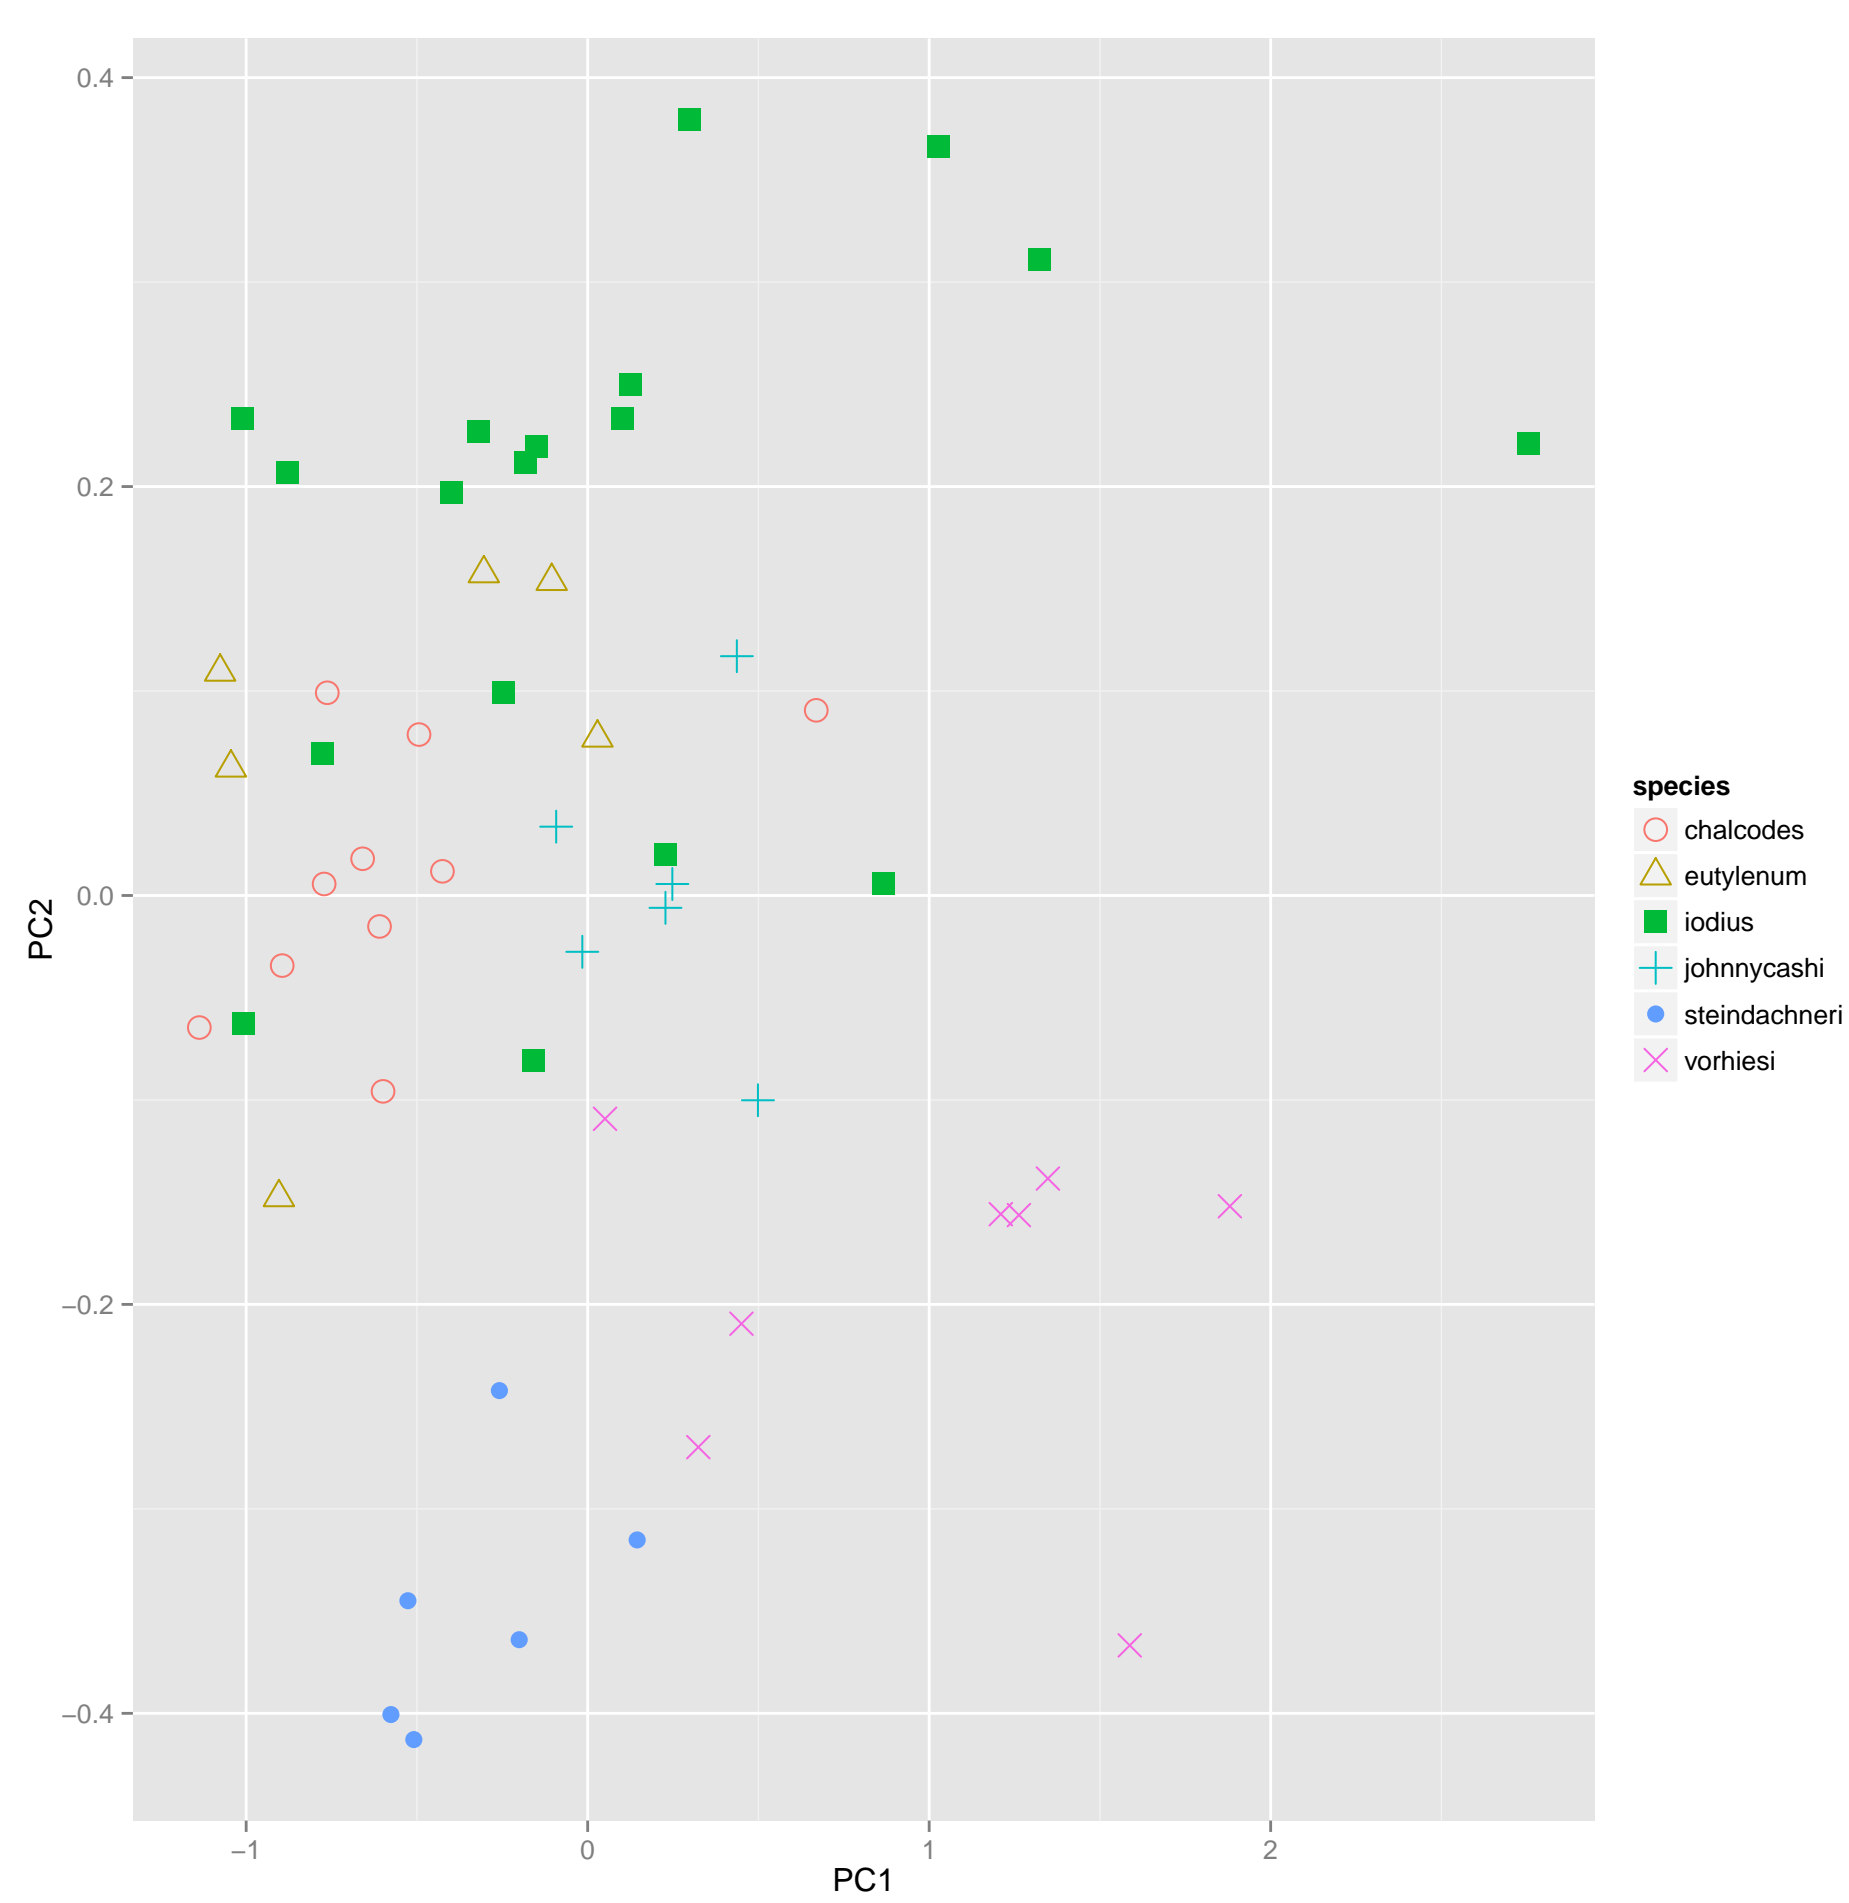

Supplement: Supplementary file 416

# Patella 3/Patella 4 ratio – females

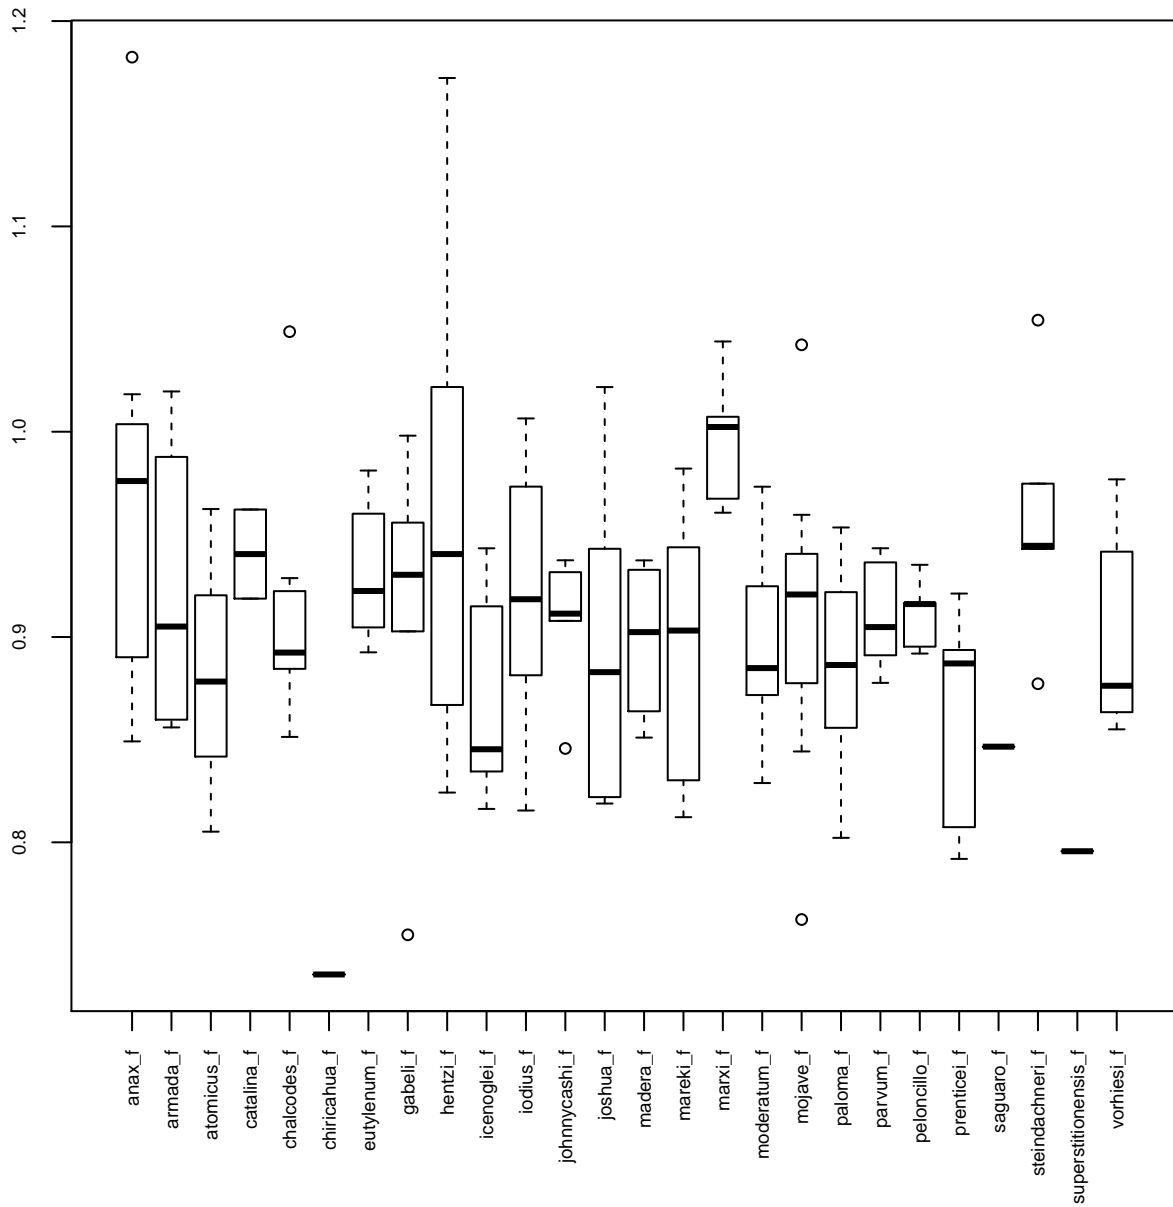

Supplement: Supplementary file 417

## Tarsus 1/Femur 3 Length ratio – females

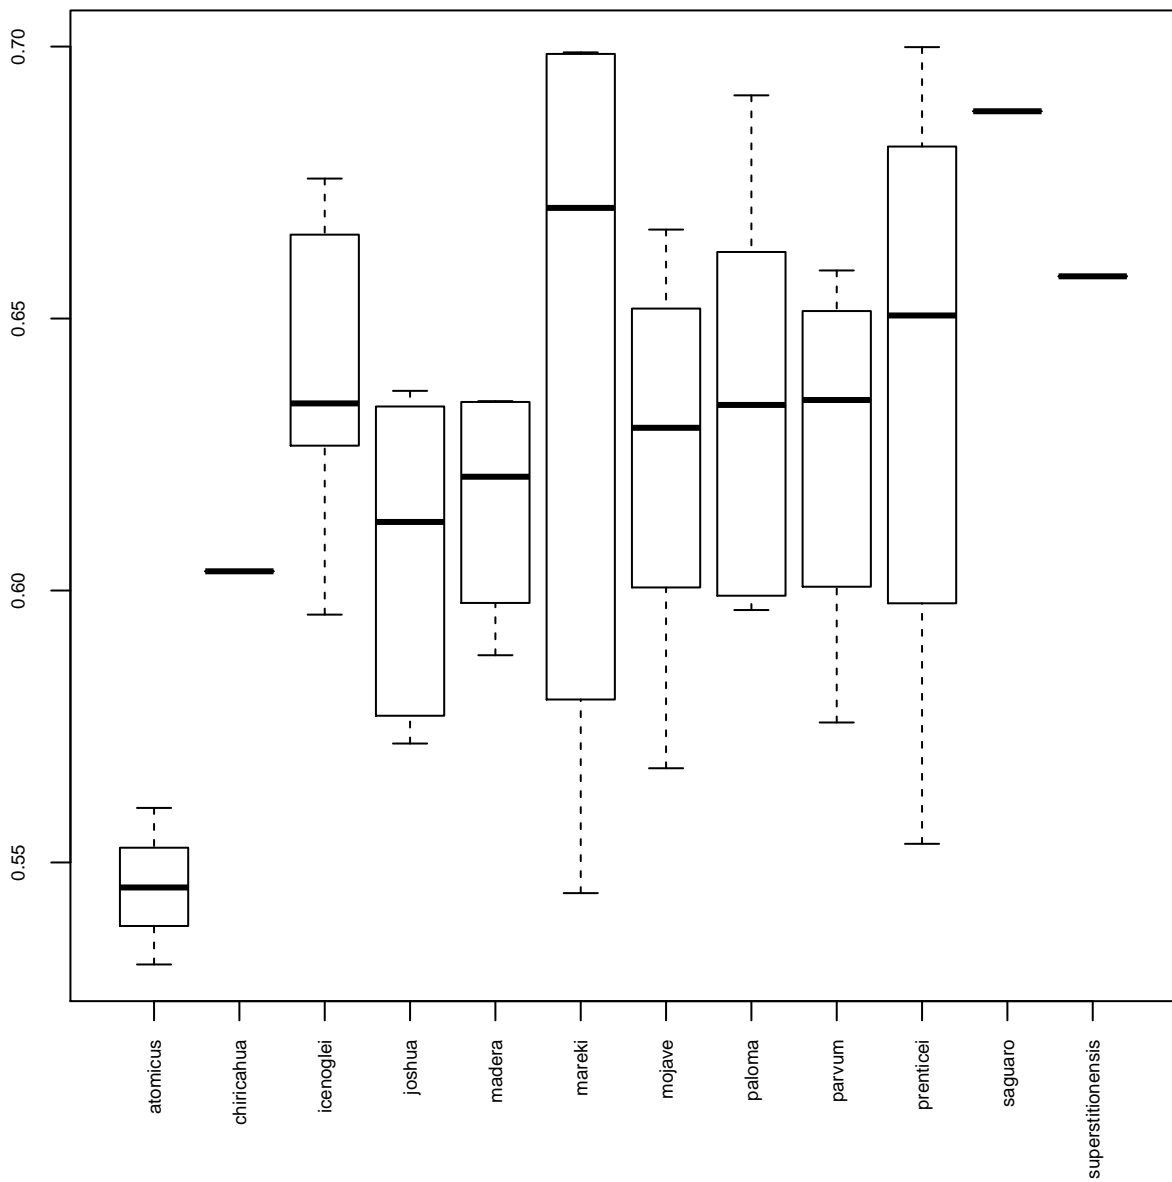

Supplement: Supplementary file 418

## Femur 1/Patella 4 ratio – males

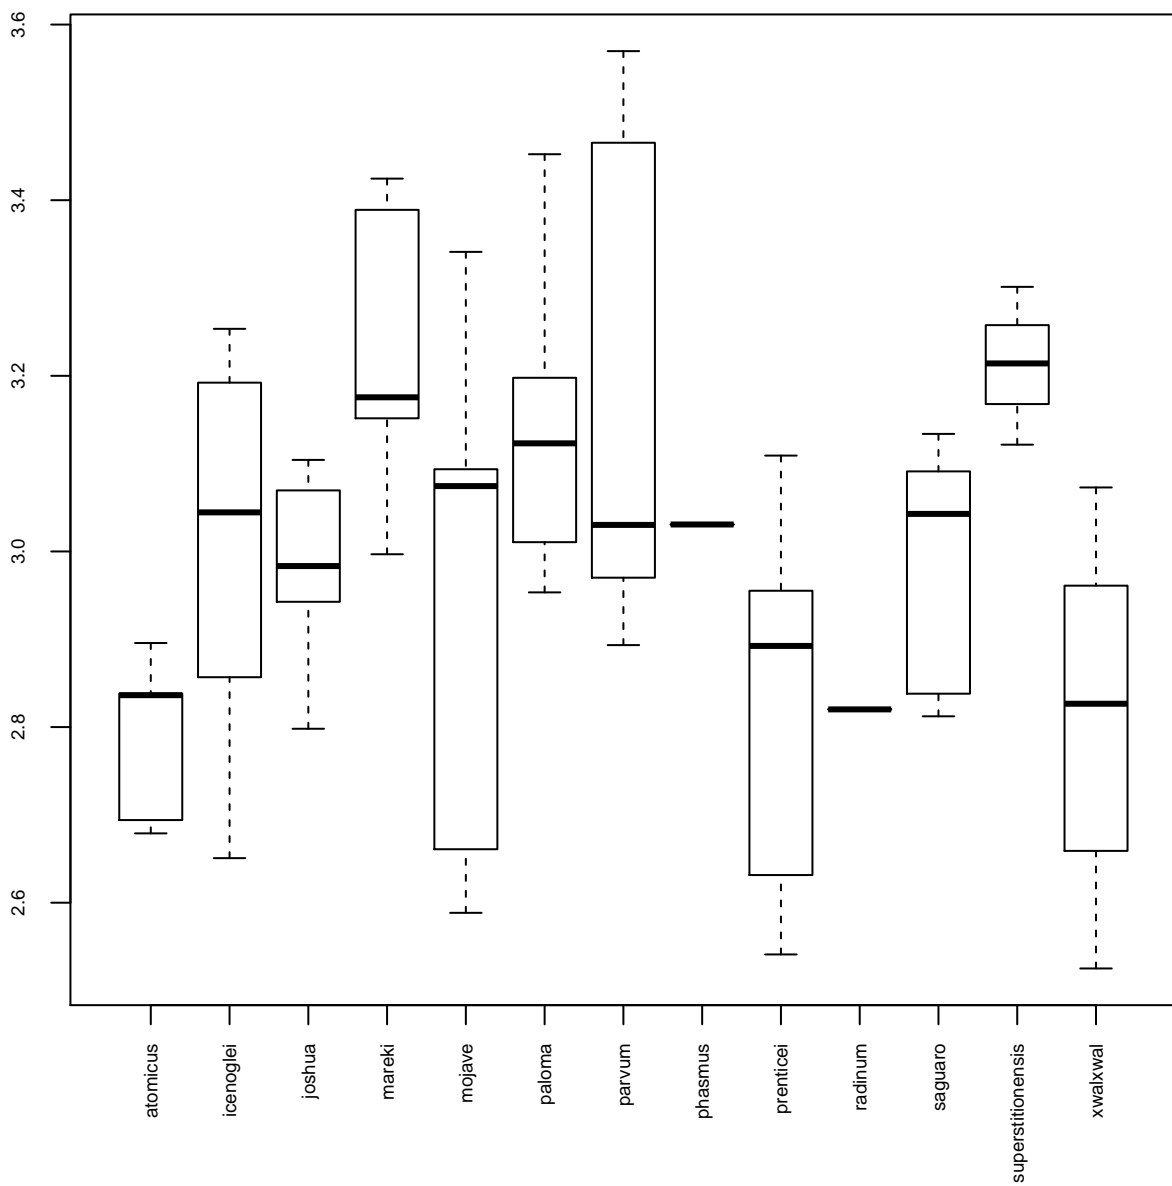

Supplement: Supplementary file 419

# Femur 1/Tarsus 4 ratio – males

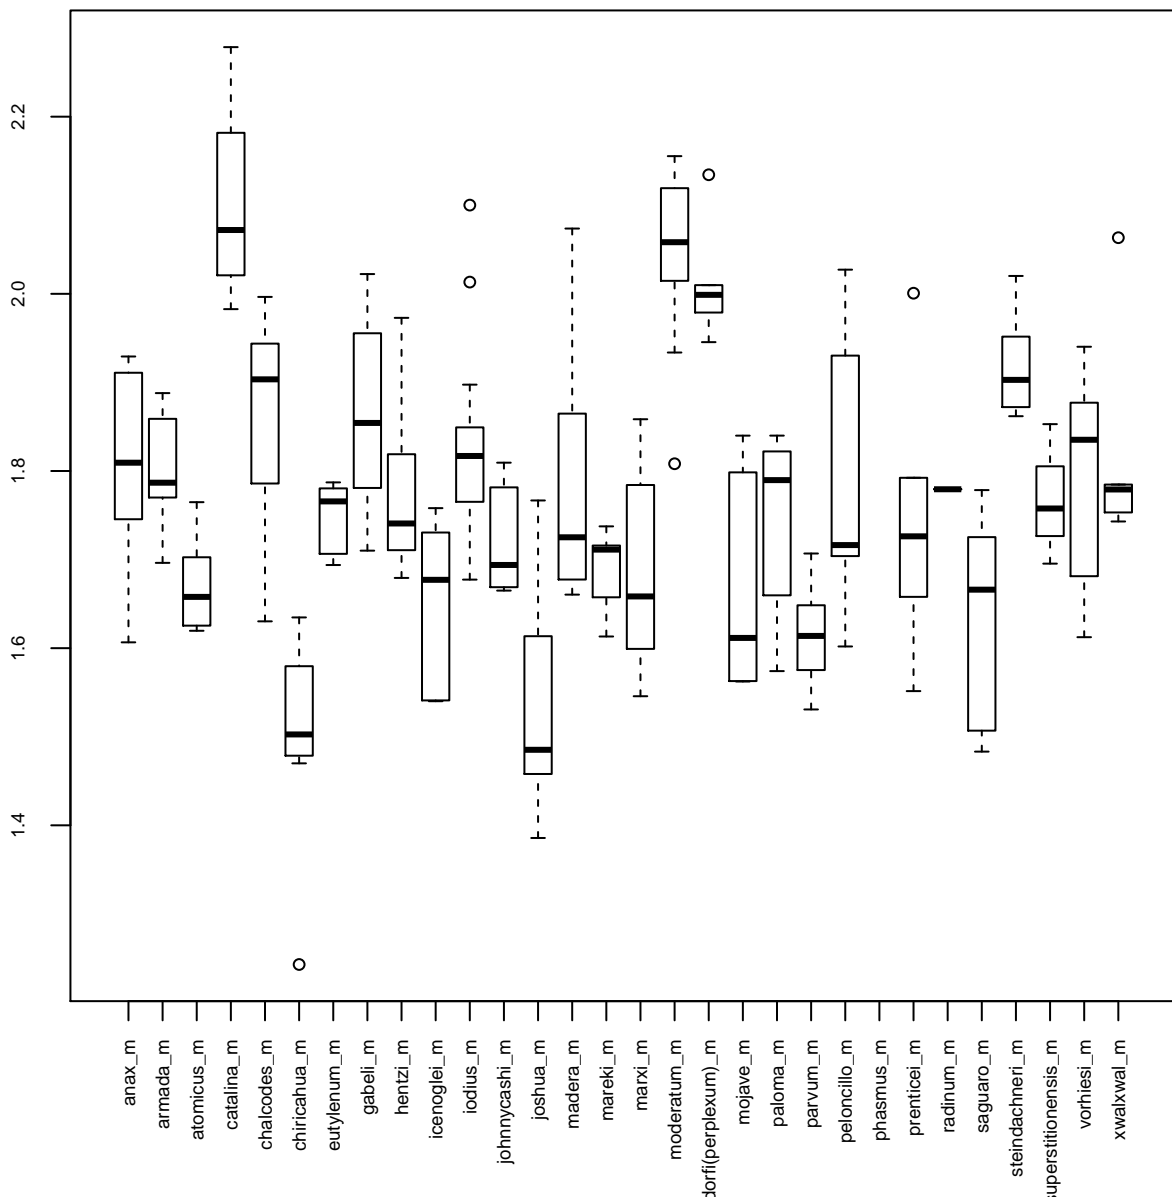

Supplement: Supplementary file 420

## Femur 1/Metatarsus 1 ratio – males

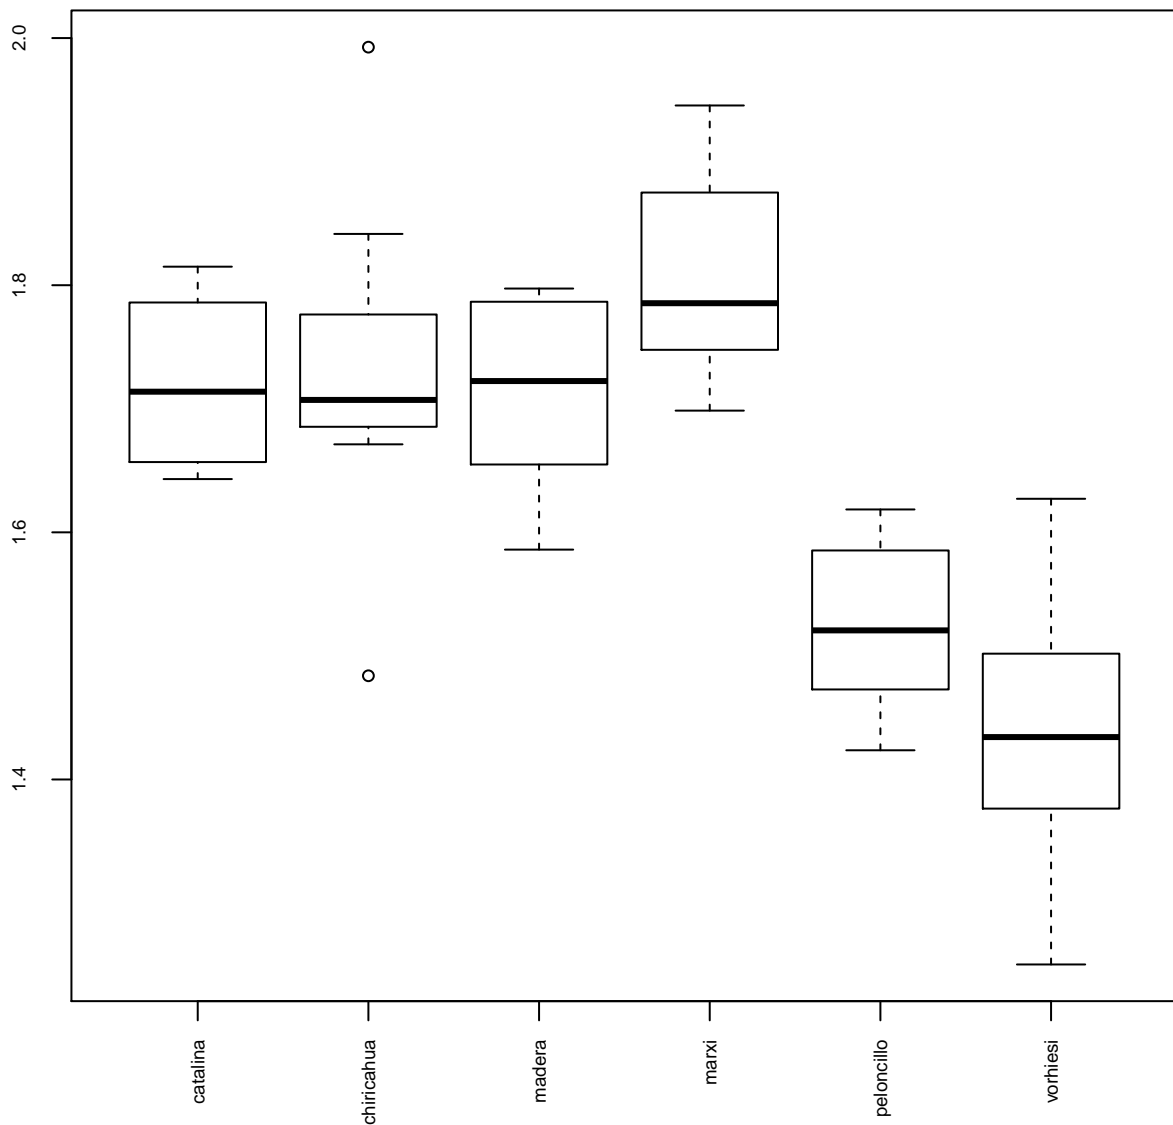

Supplement: Supplementary file 421

# Tibia 4/Metatarsus 4 ratio – males

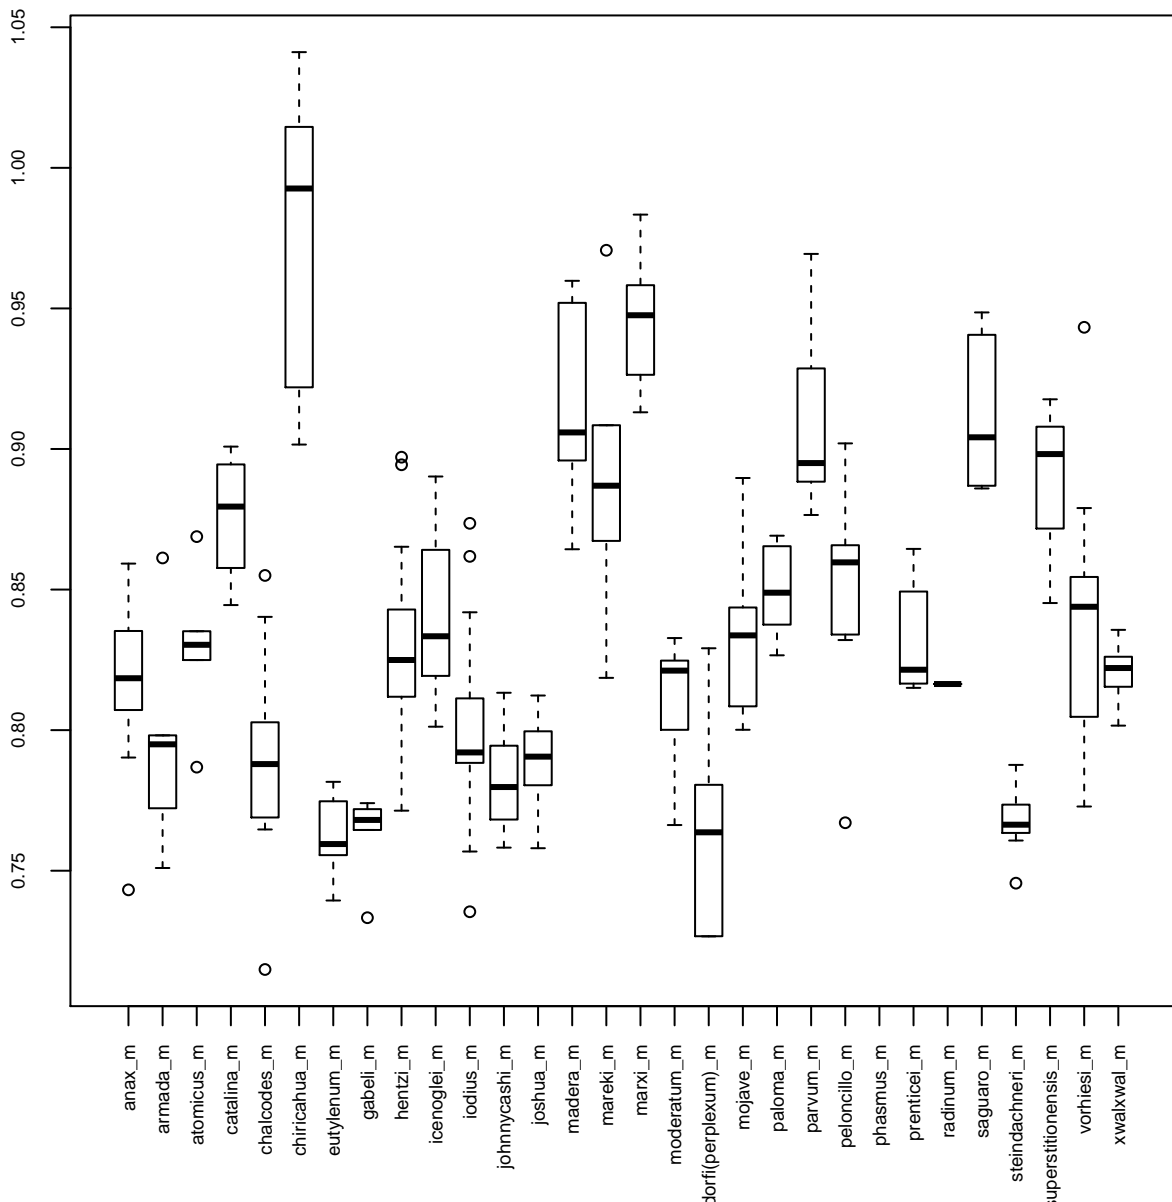

Supplement: Supplementary file 422

Tibia 4/Tarsus 4 ratio – males

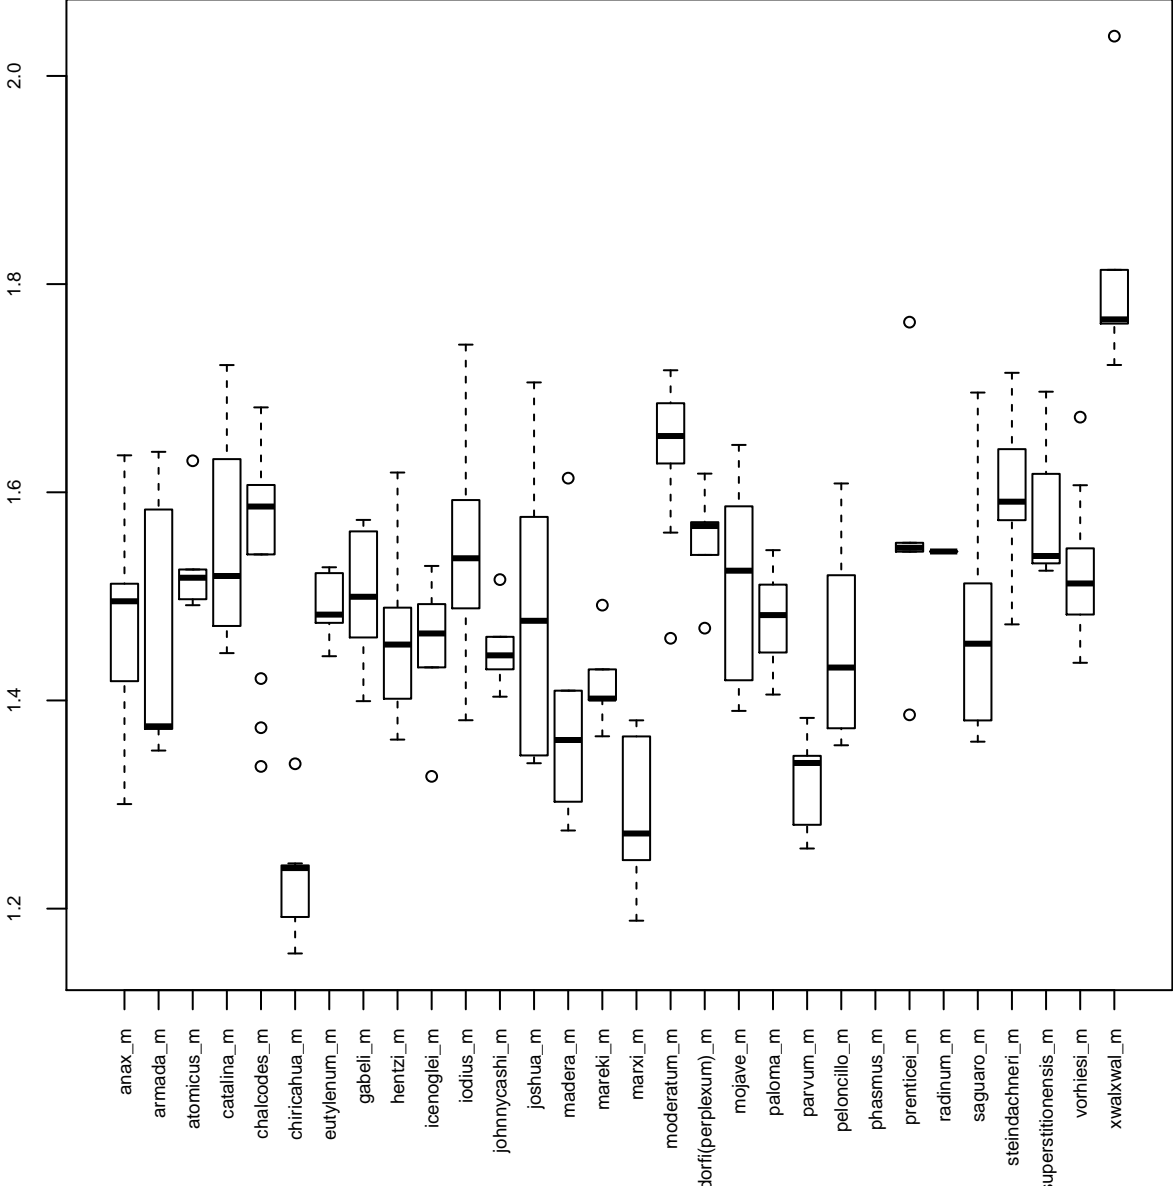

Supplement: Supplementary file 423

## Tibia 4/Metatarsus 4 ratio – females

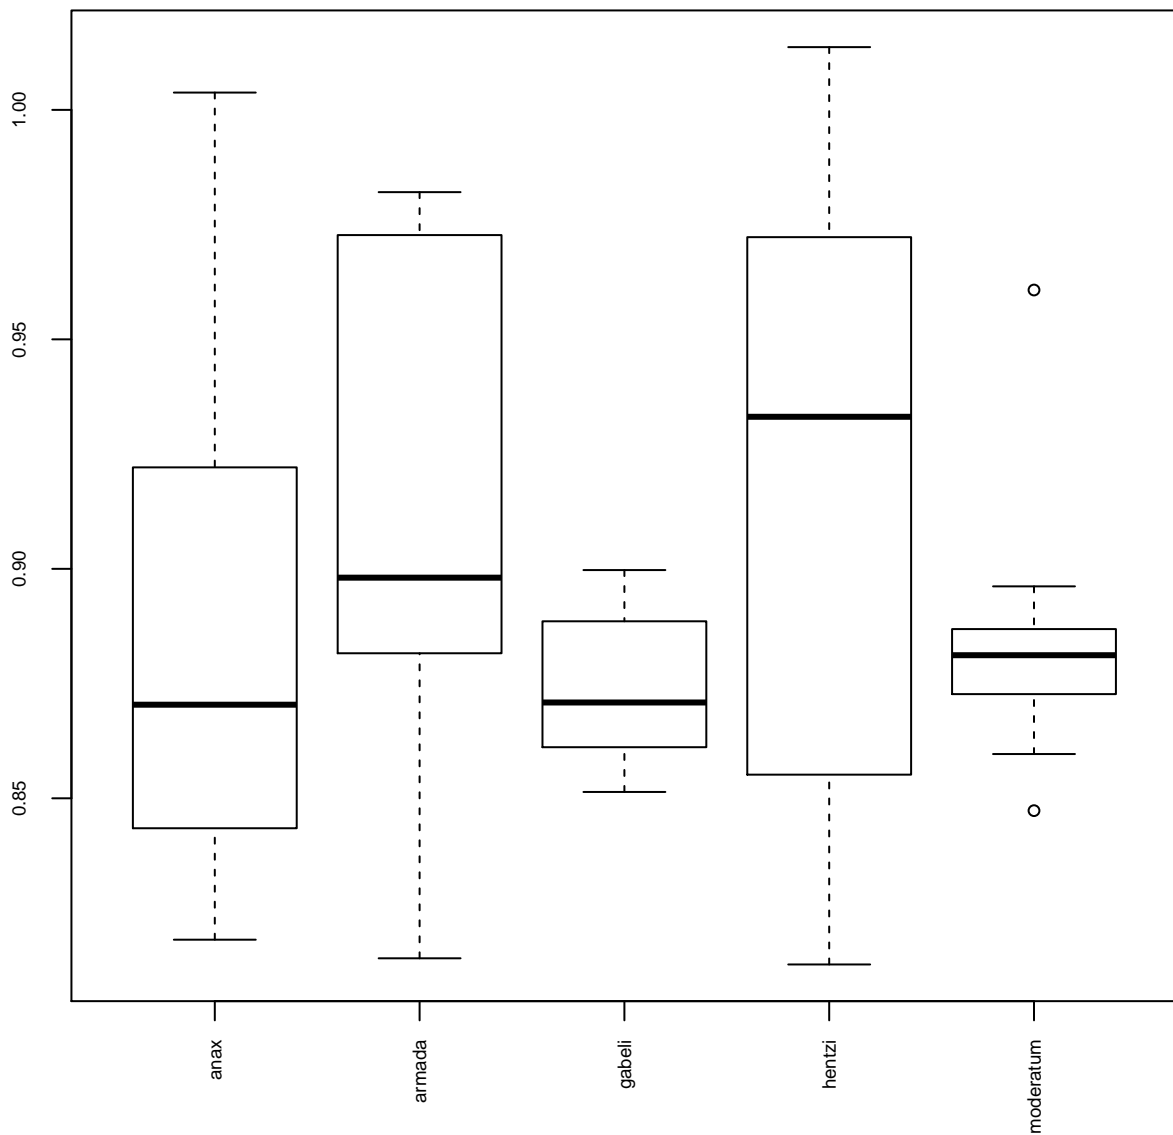

Supplement: Supplementary file 424

## Leg 4 Scopulation ratio – males

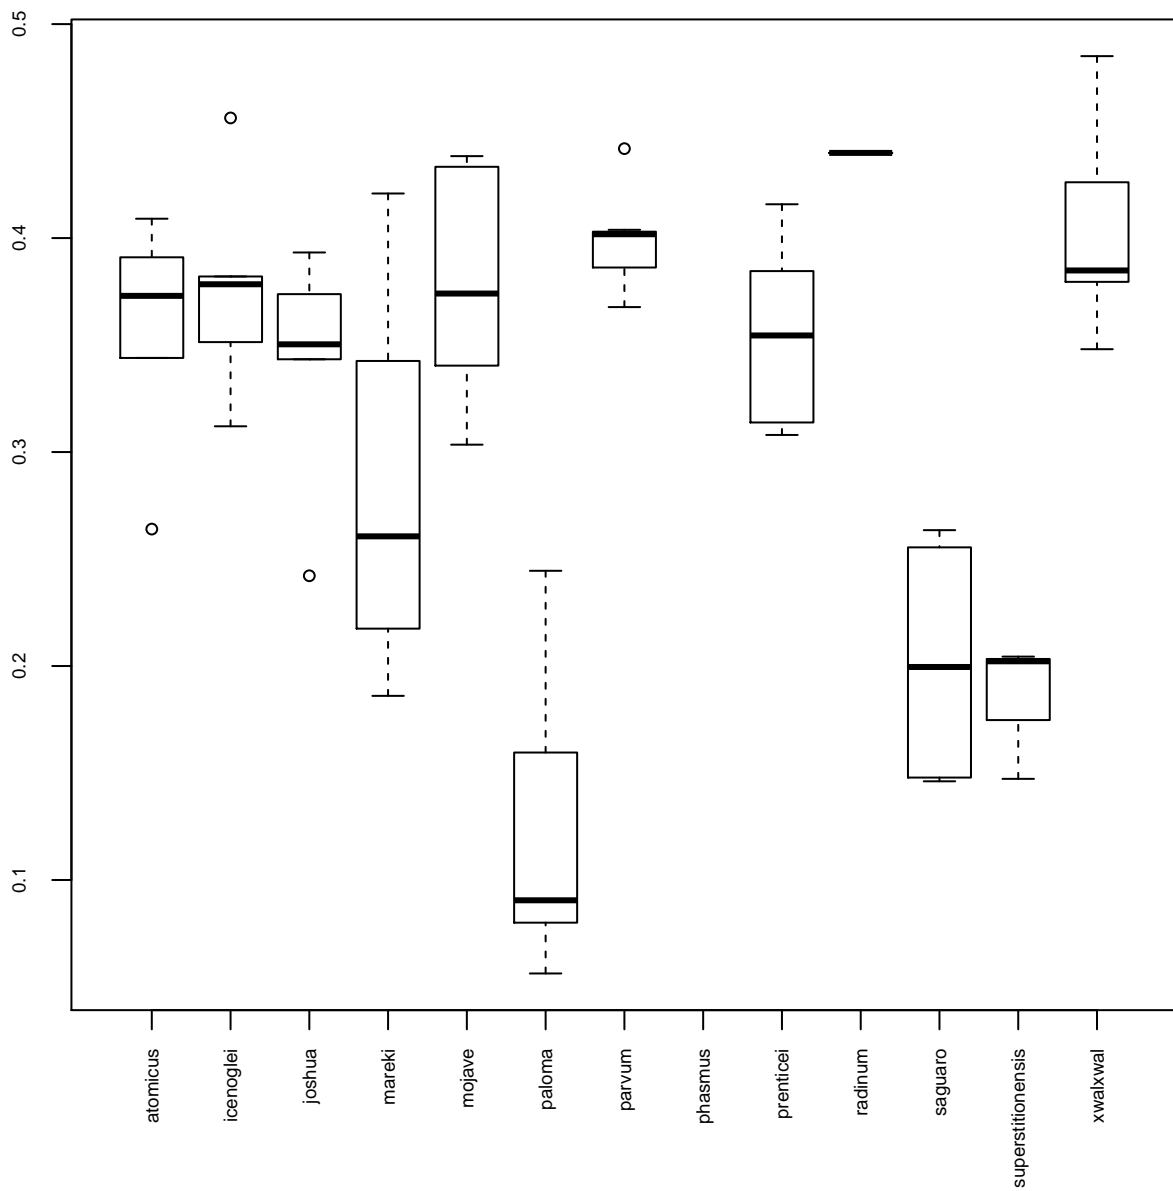

Supplement: Supplementary file 425

## Tarsus 3/Tibia 4 Length ratio – females

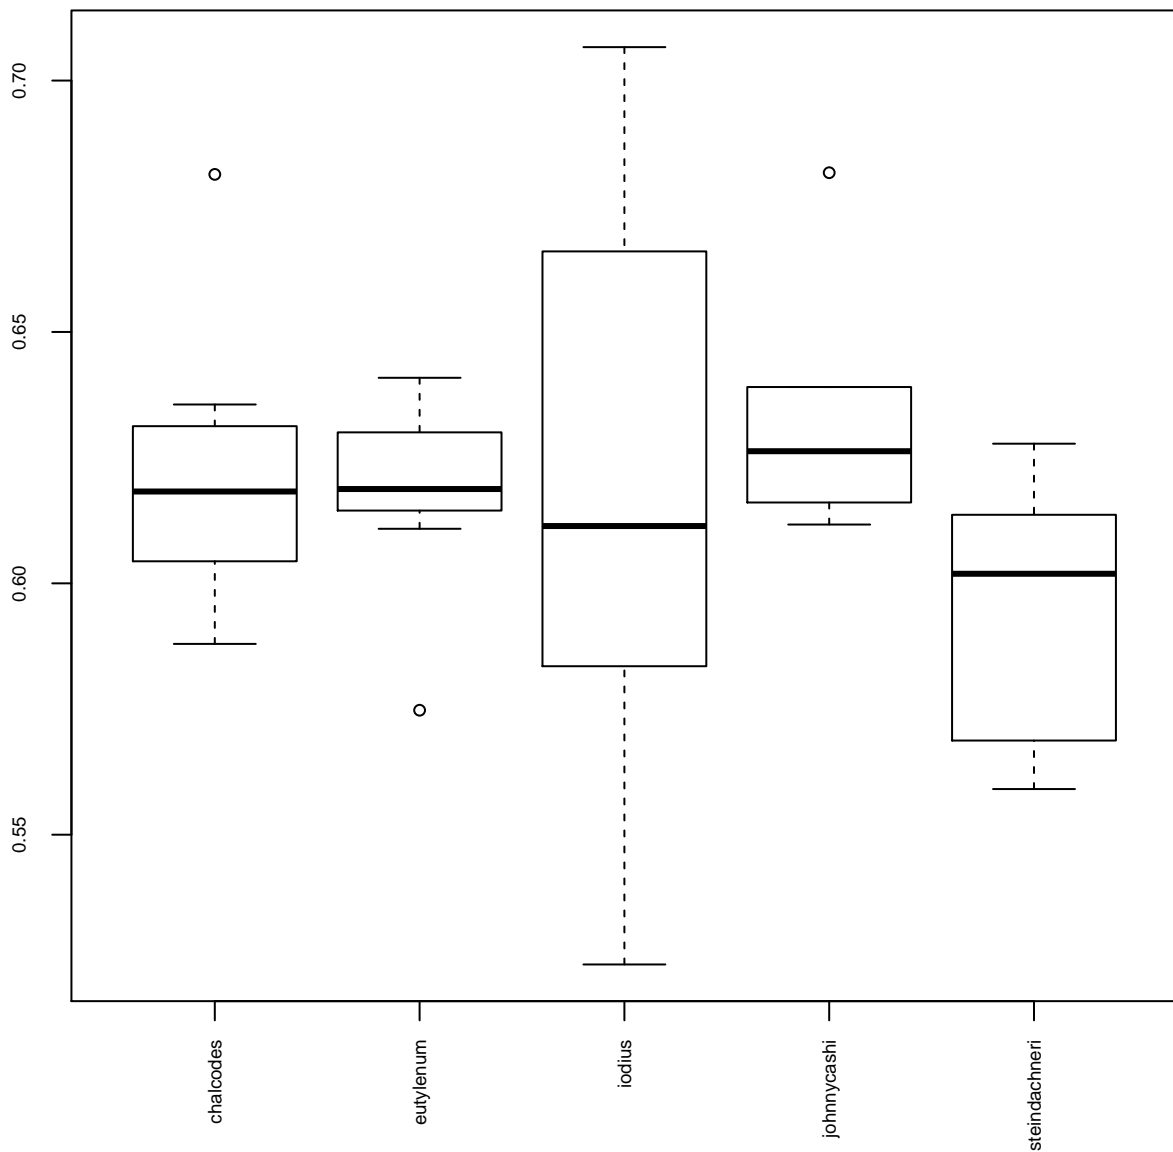

Supplement: Supplementary file 426

## Femur 3/Metatarsus 4 Length ratio – males

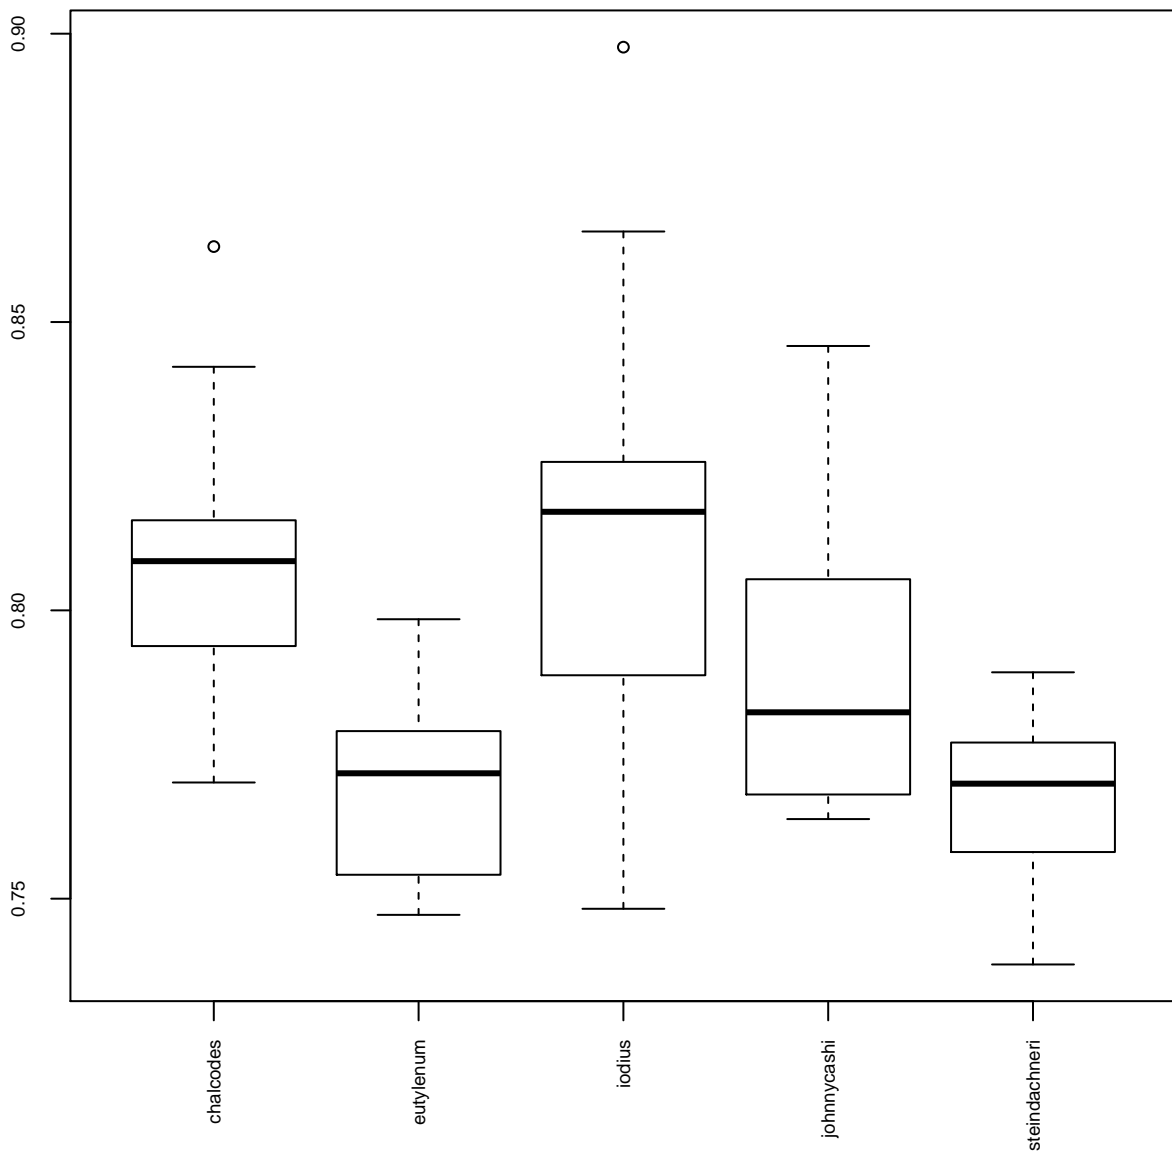

Supplement: Supplementary file 427

## Palpal Tibia/Femur 4 Length ratio – males

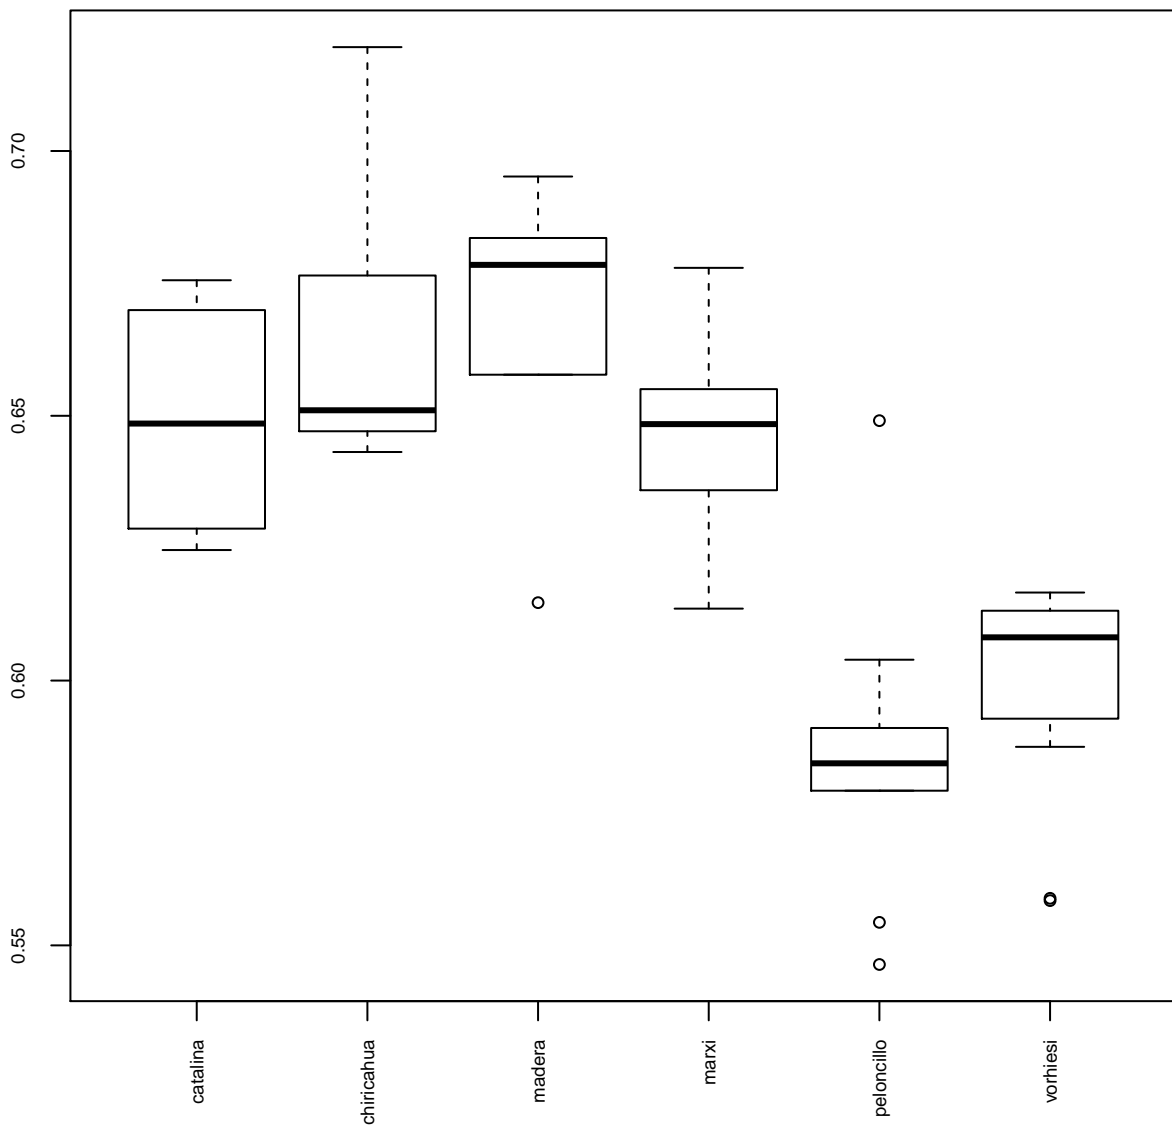

Supplement: Supplementary file 428

## Femur 4/Tarsus 4 ratio – males

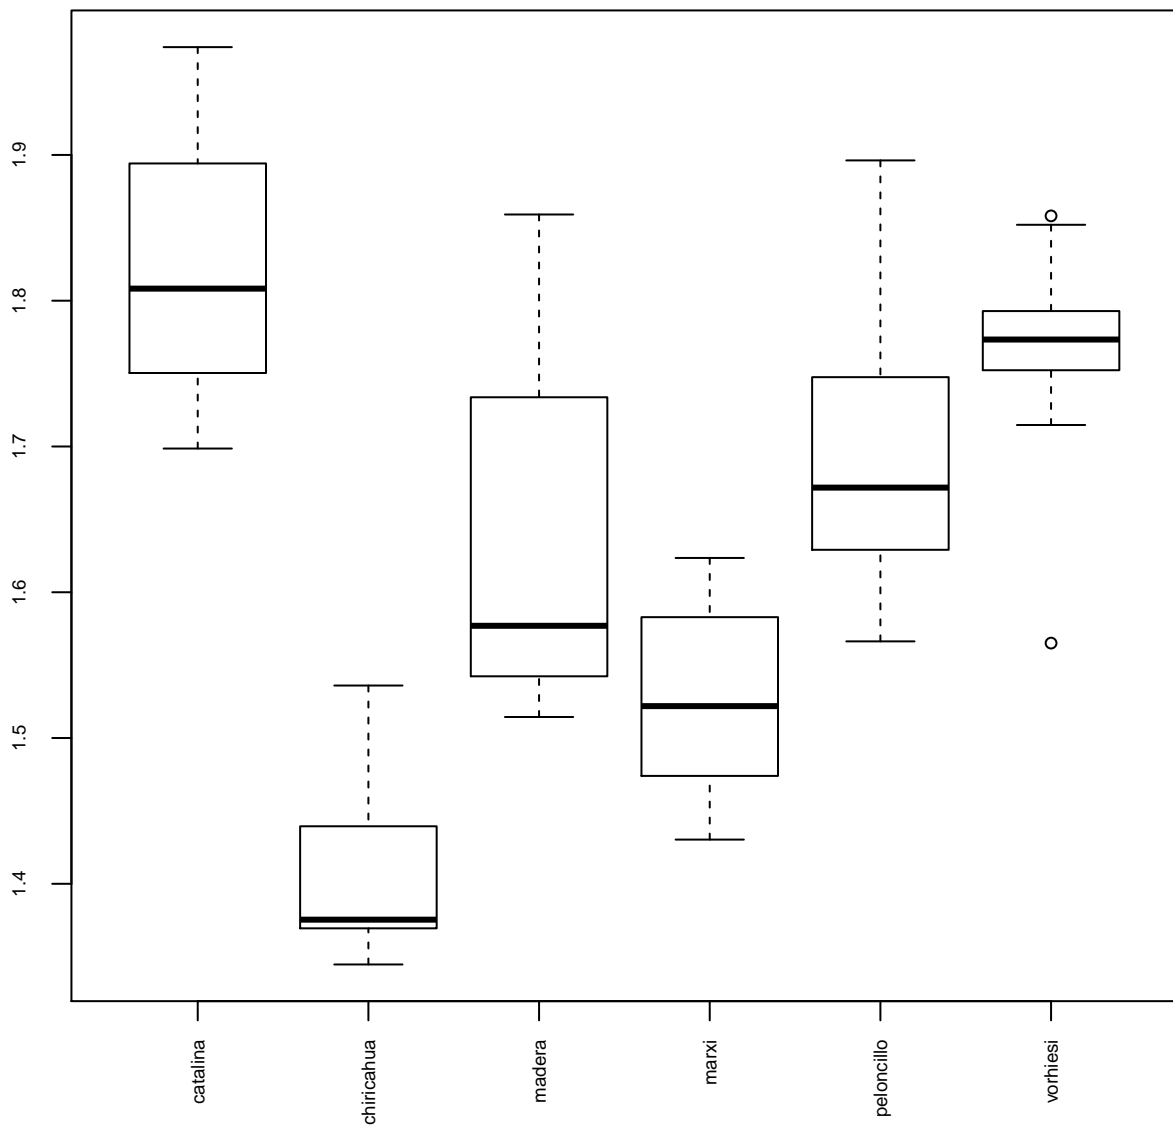

Supplement: Supplementary file 429

## Tibia 1/Tarsus 4 Length ratio – females

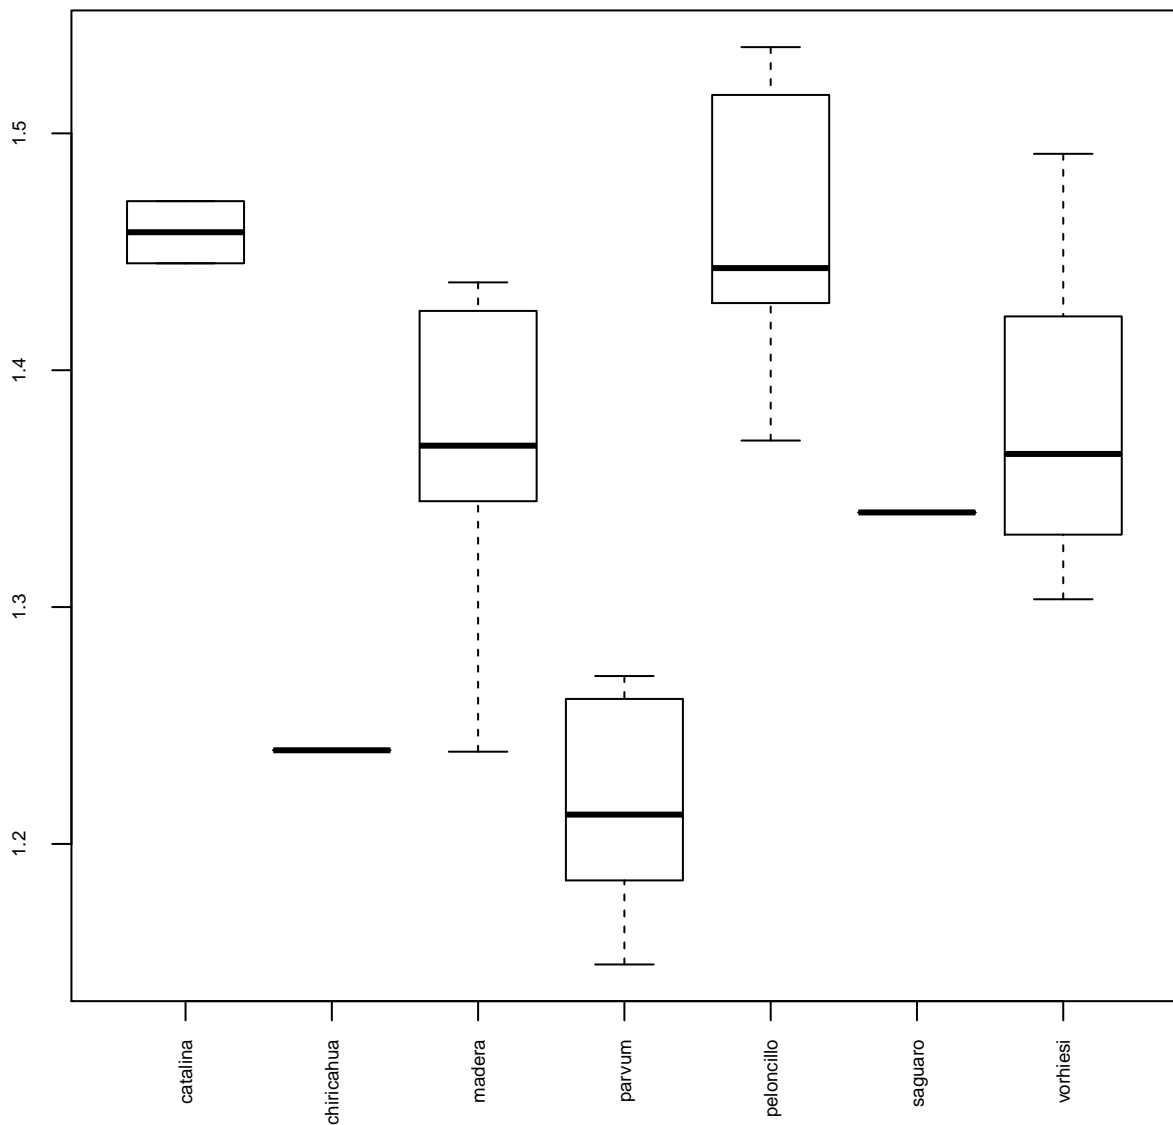

Supplement: Supplementary file 430

## Tibia 1/Metatarsus 3 Length ratio – females

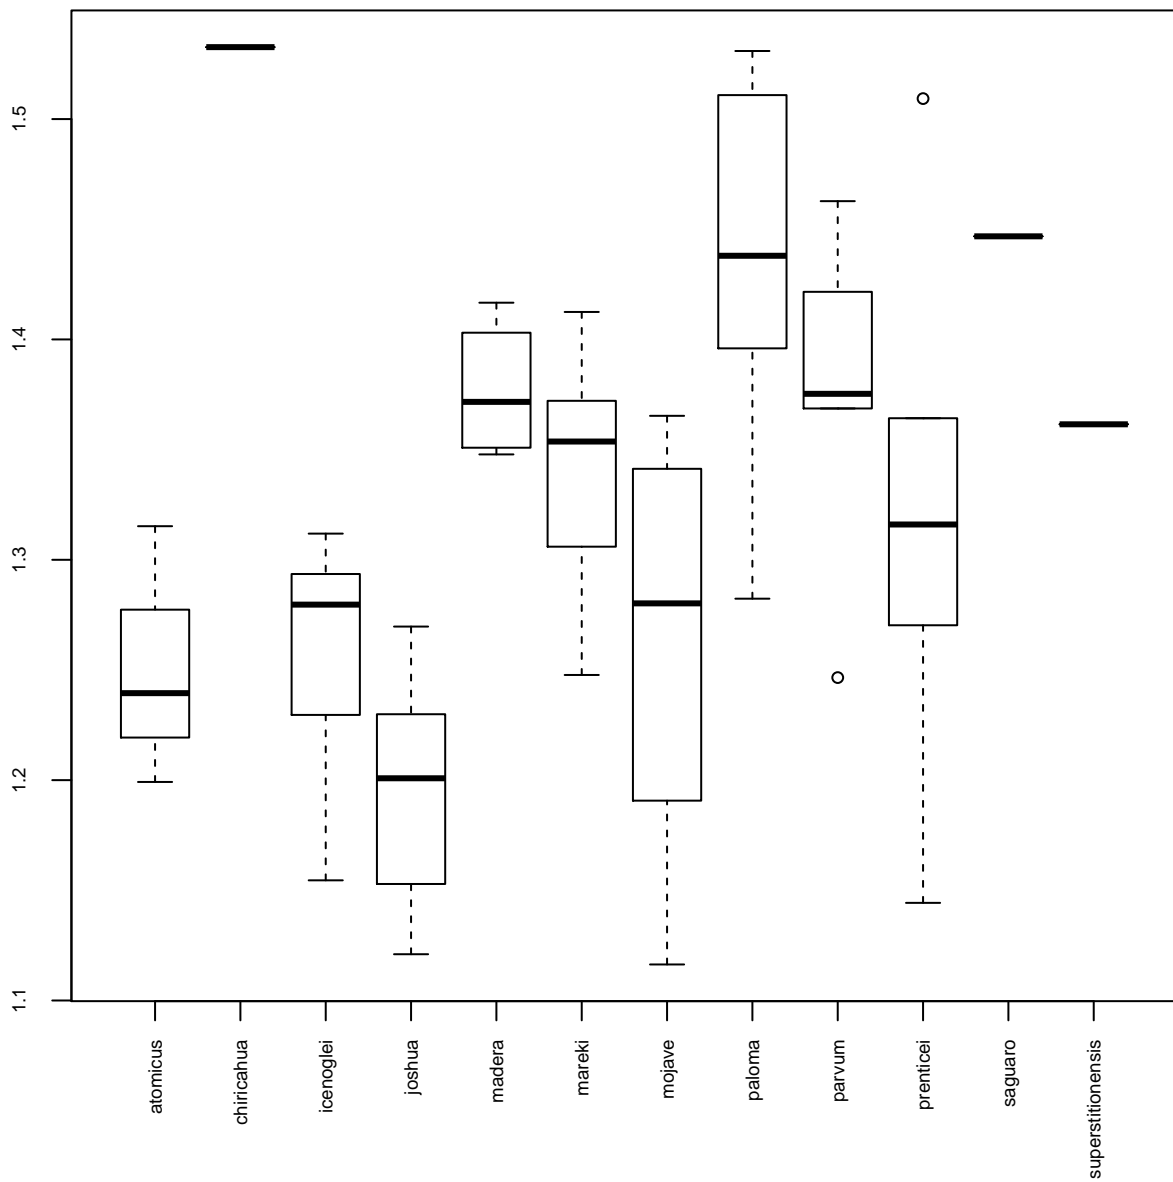

Supplement: Supplementary file 431

## Femur 3/Tarsus 4 Length ratio – females

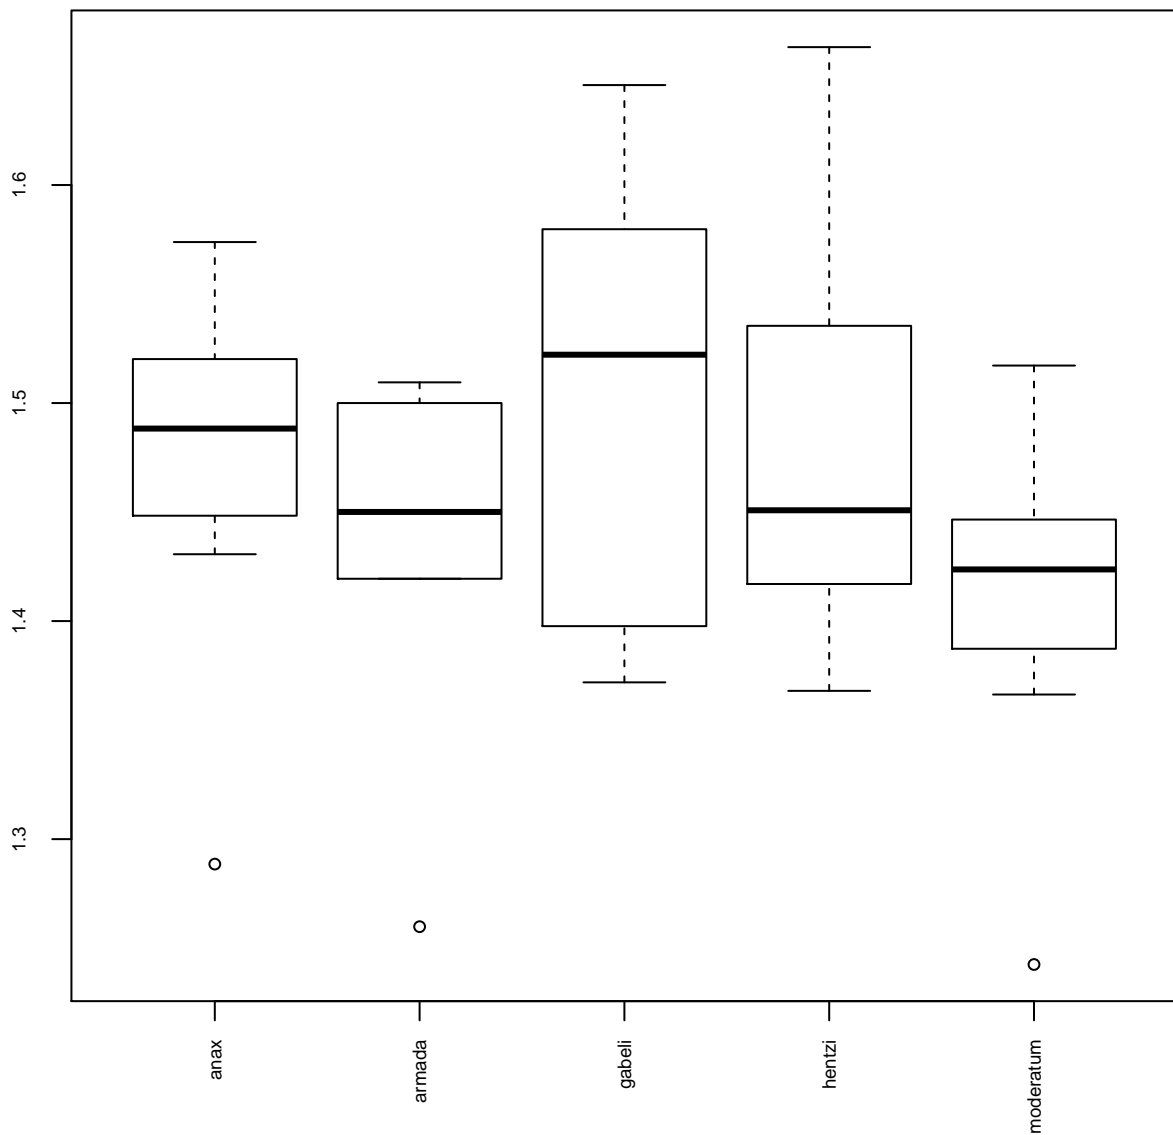

Supplement: Supplementary file 432

## Leg 1 Length – females

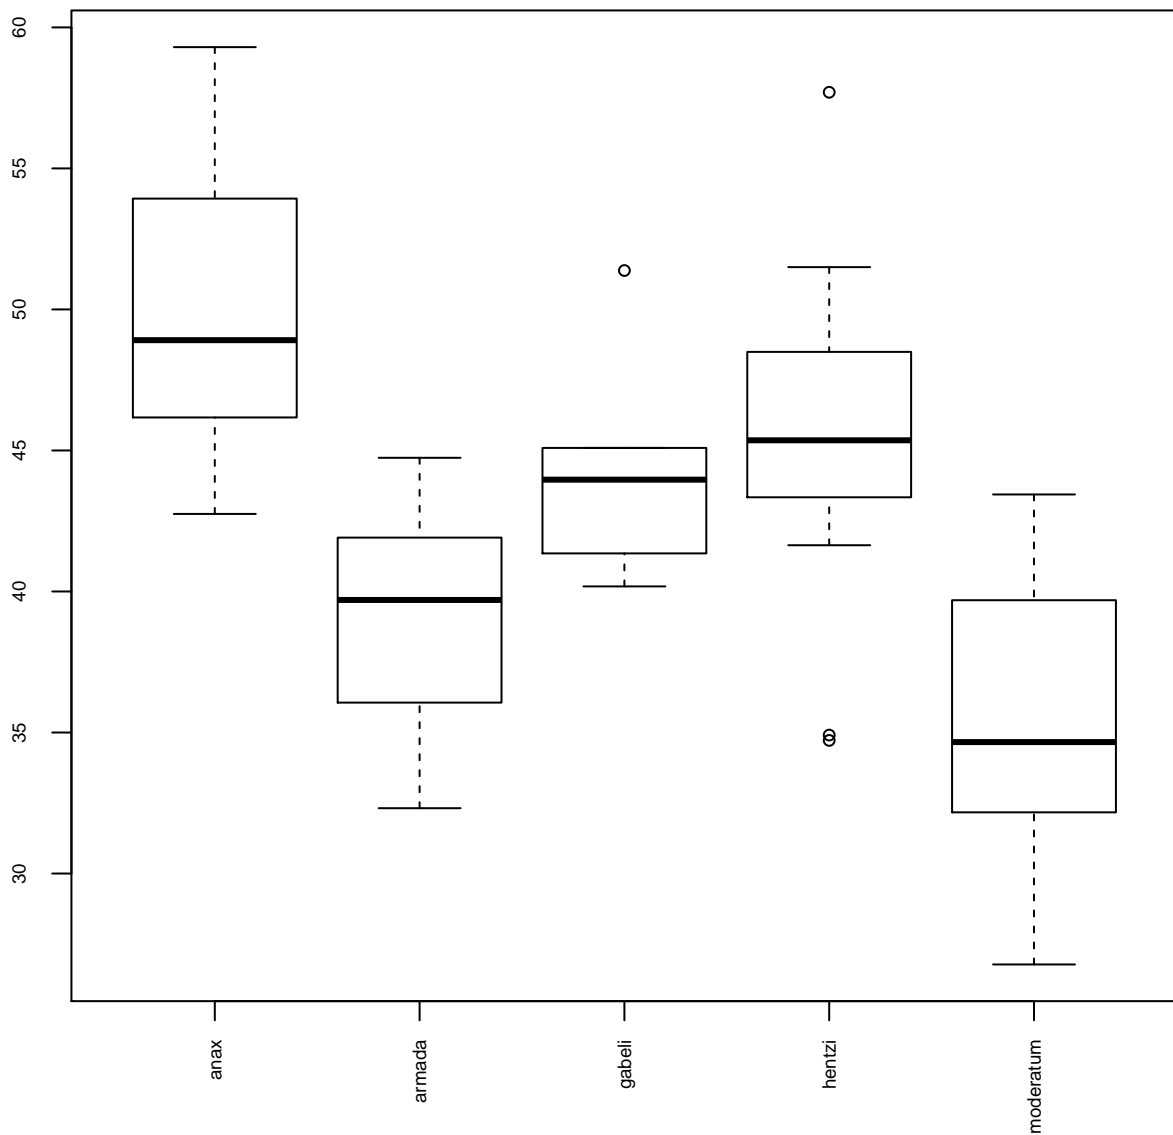

Supplement: Supplementary file 433

## Tarsus 3/Femur 4 Length ratio – females

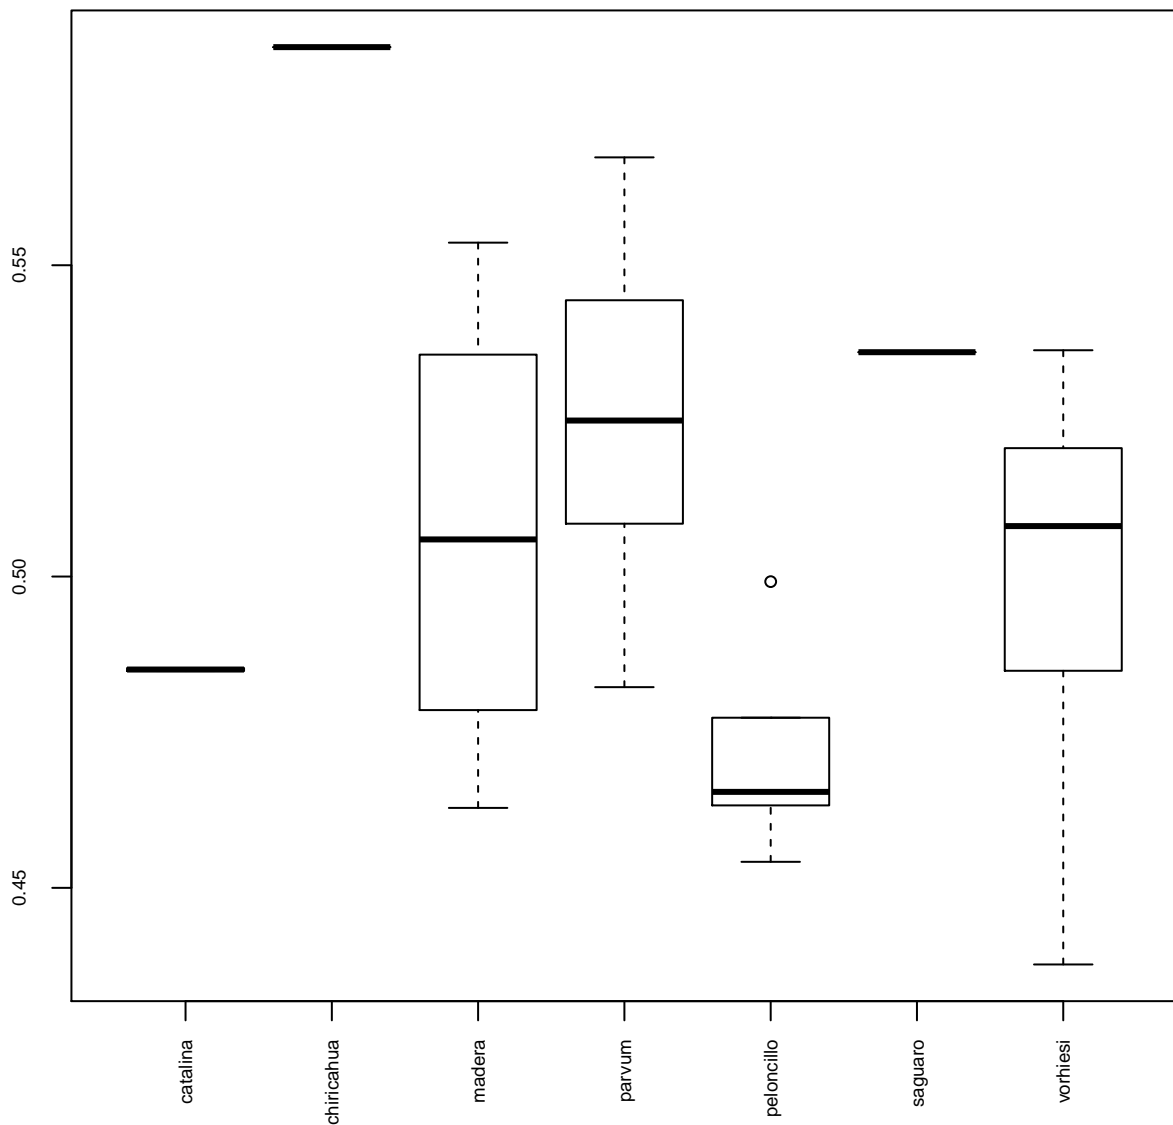

Supplement: Supplementary file 434

## Metatarsus 1/Femur 4 Length ratio – females

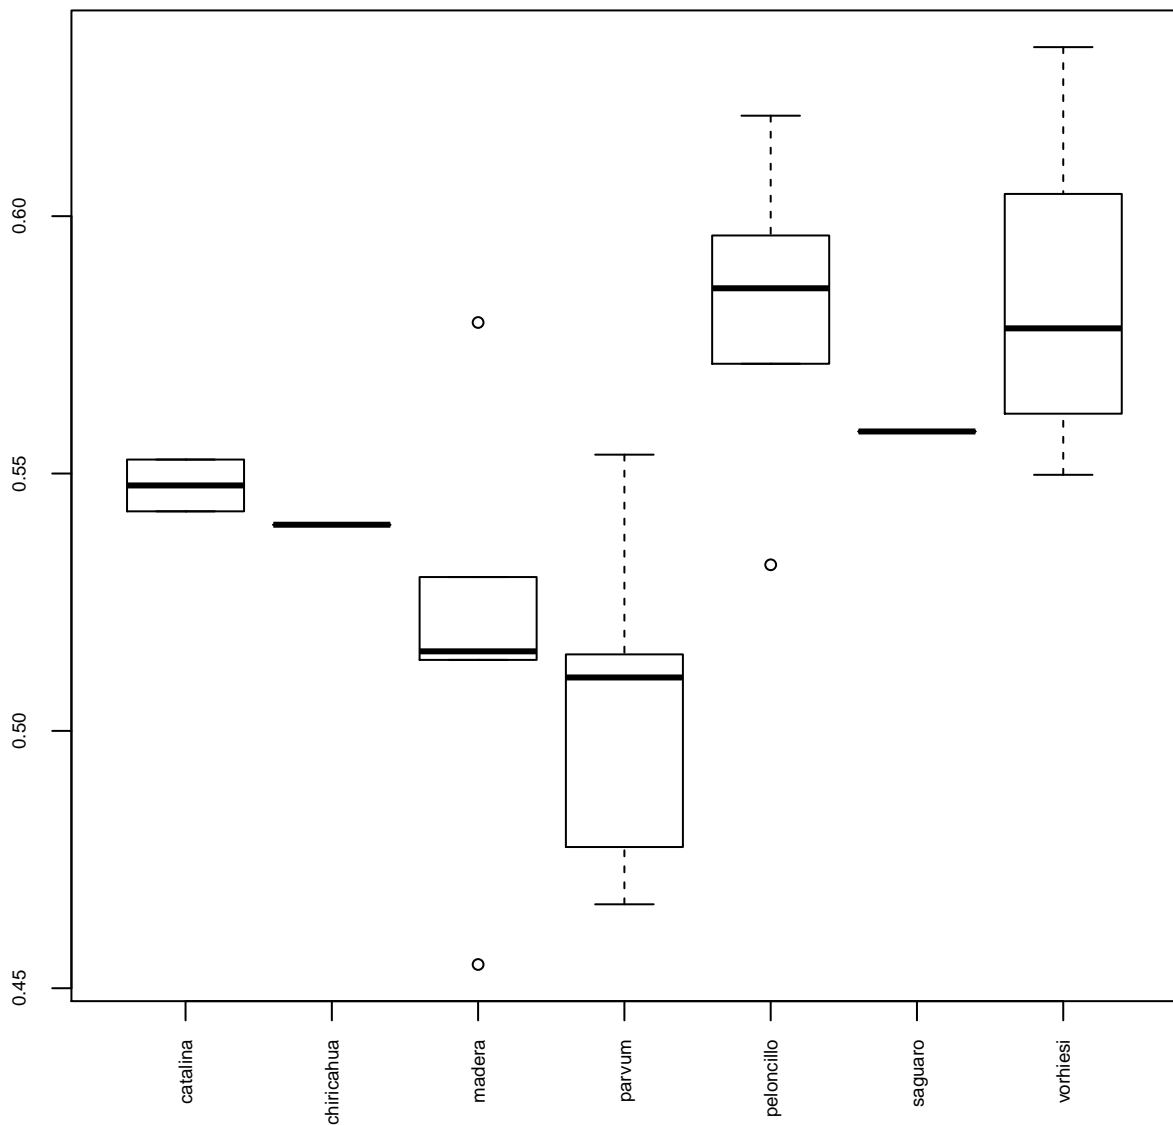

Supplement: Supplementary file 435

## Carapace Length/Patella 1 ratio – males

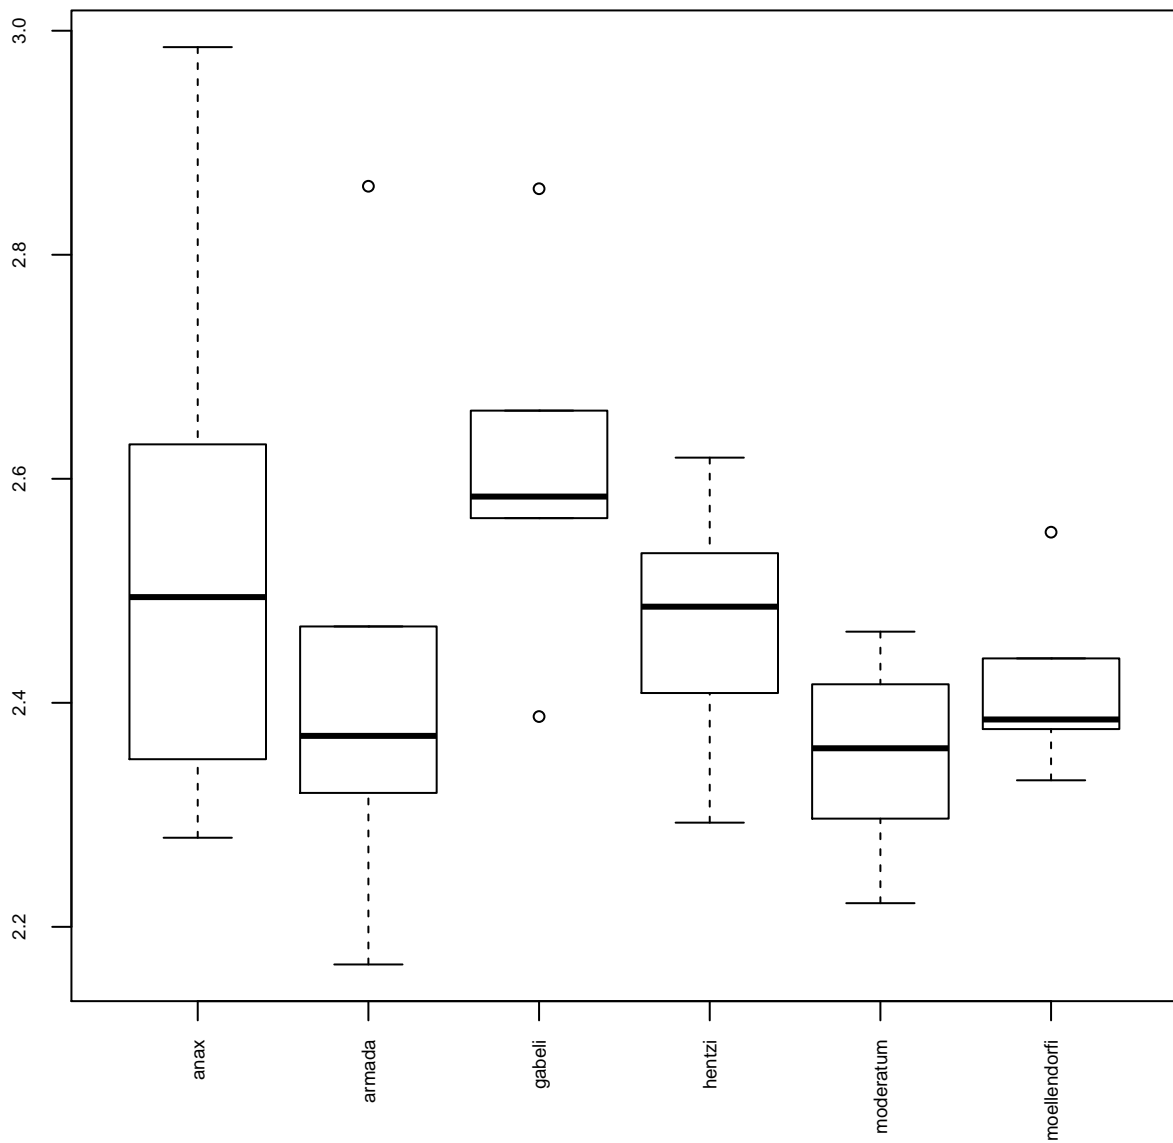

Supplement: Supplementary file 436

## Patella 1/Metatarsus 4 Length ratio – males

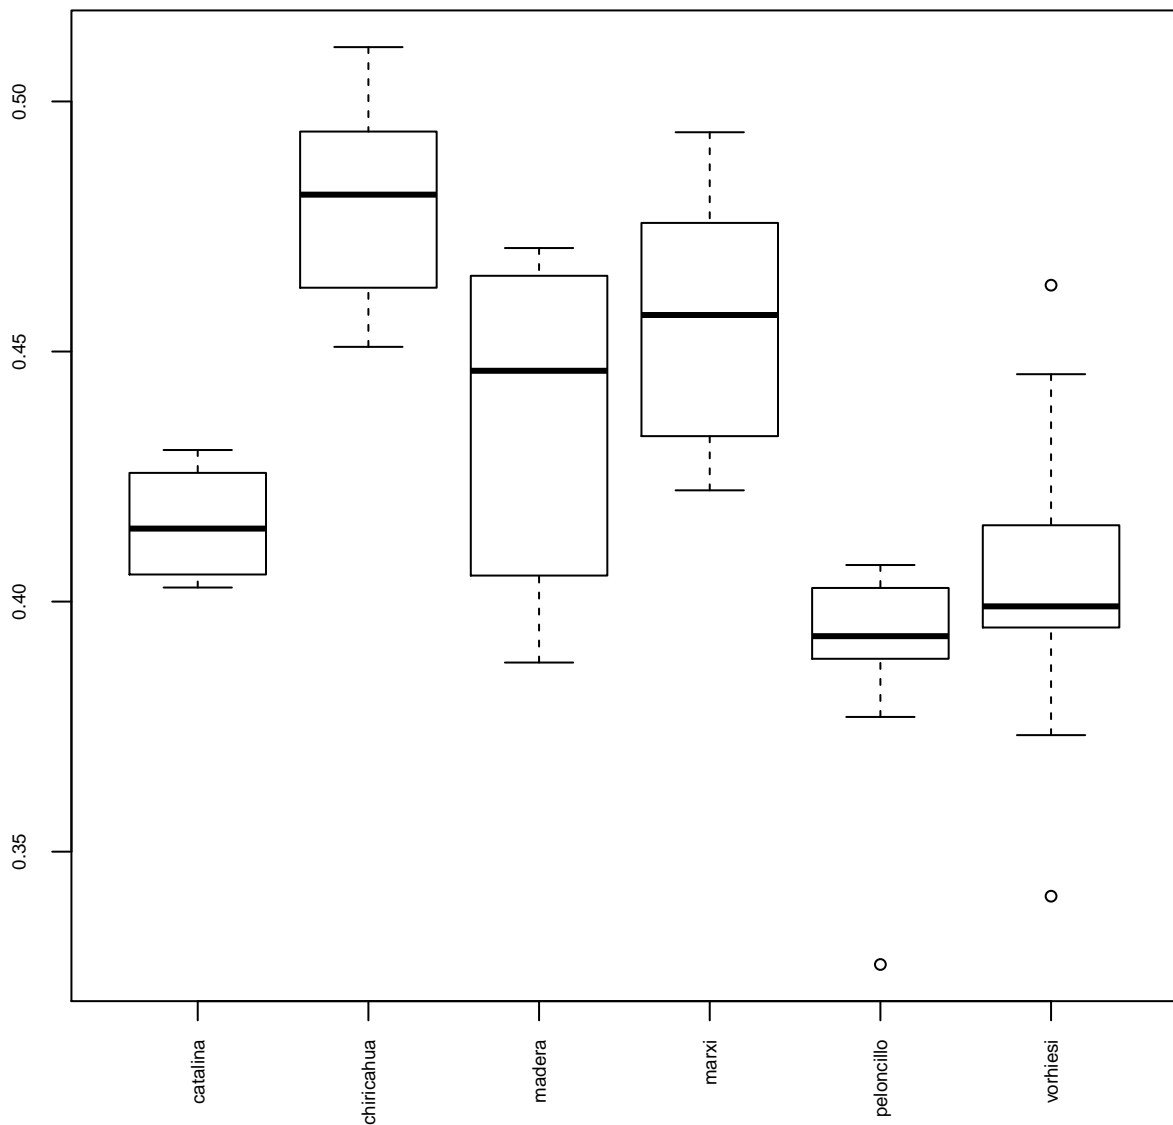

Supplement: Supplementary file 437

## Patella 1/Tarsus 4 Length ratio – females

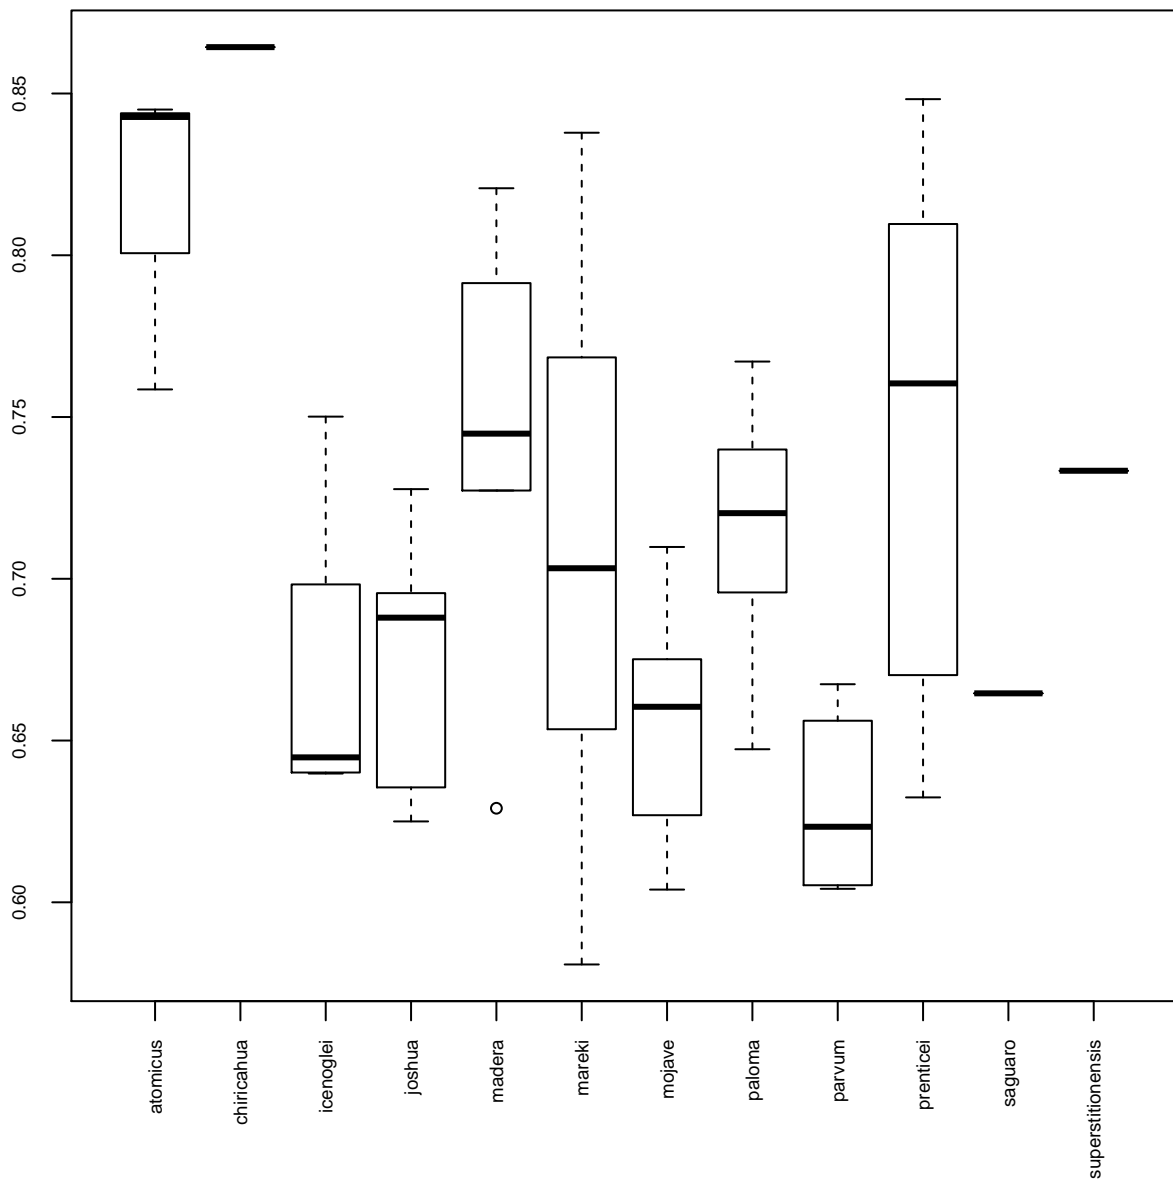

Supplement: Supplementary file 438

## Patella 1/Femur 3 Length ratio – males

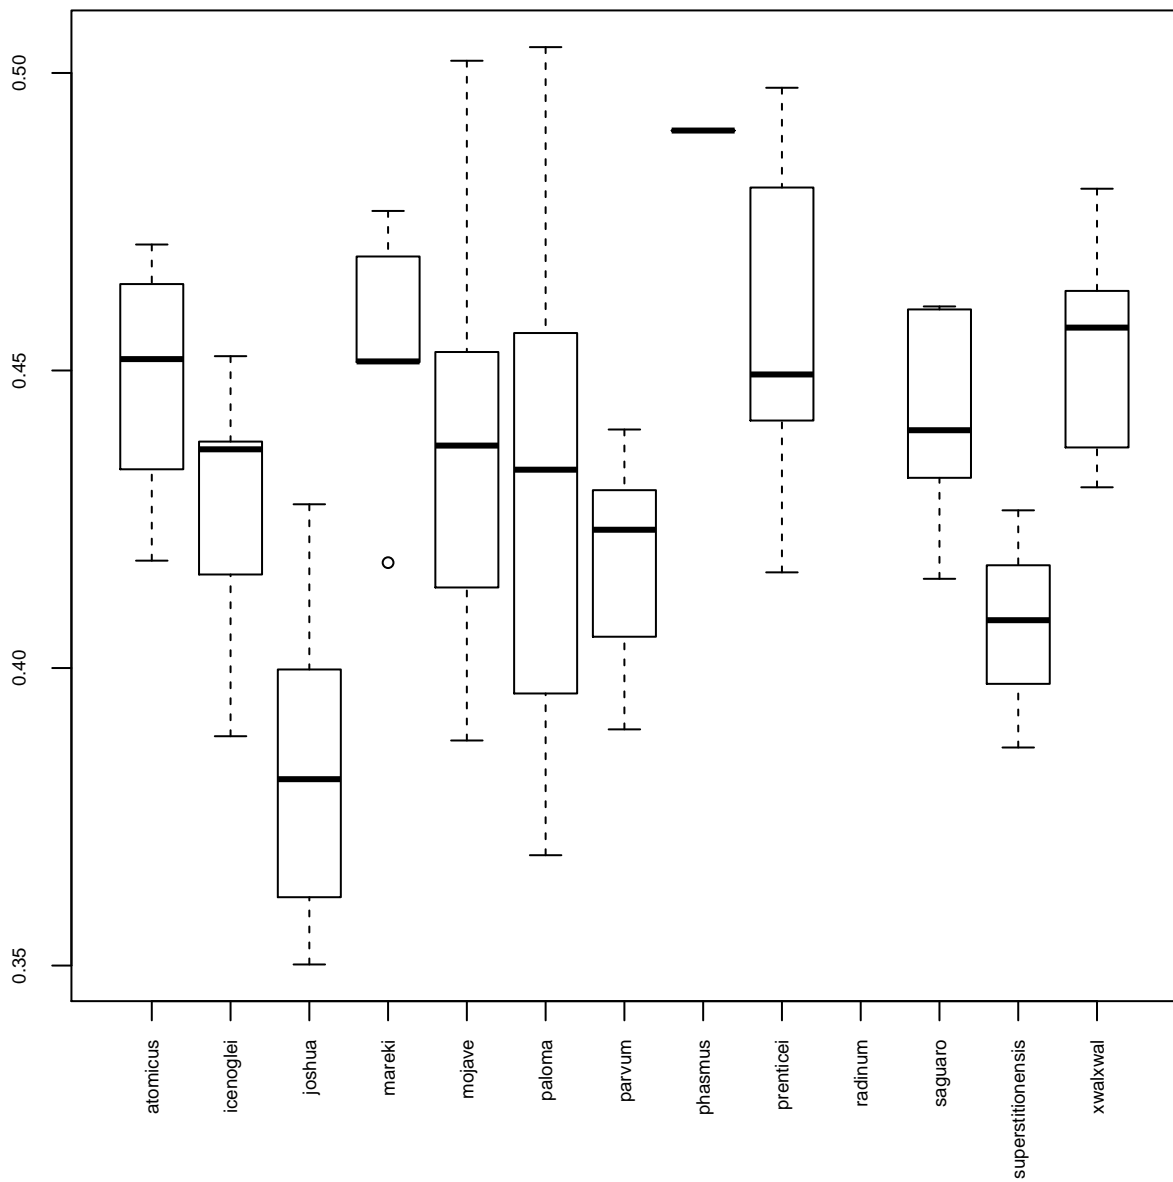

Supplement: Supplementary file 439

## Palpal Tibia/Patella 3 Length ratio – males

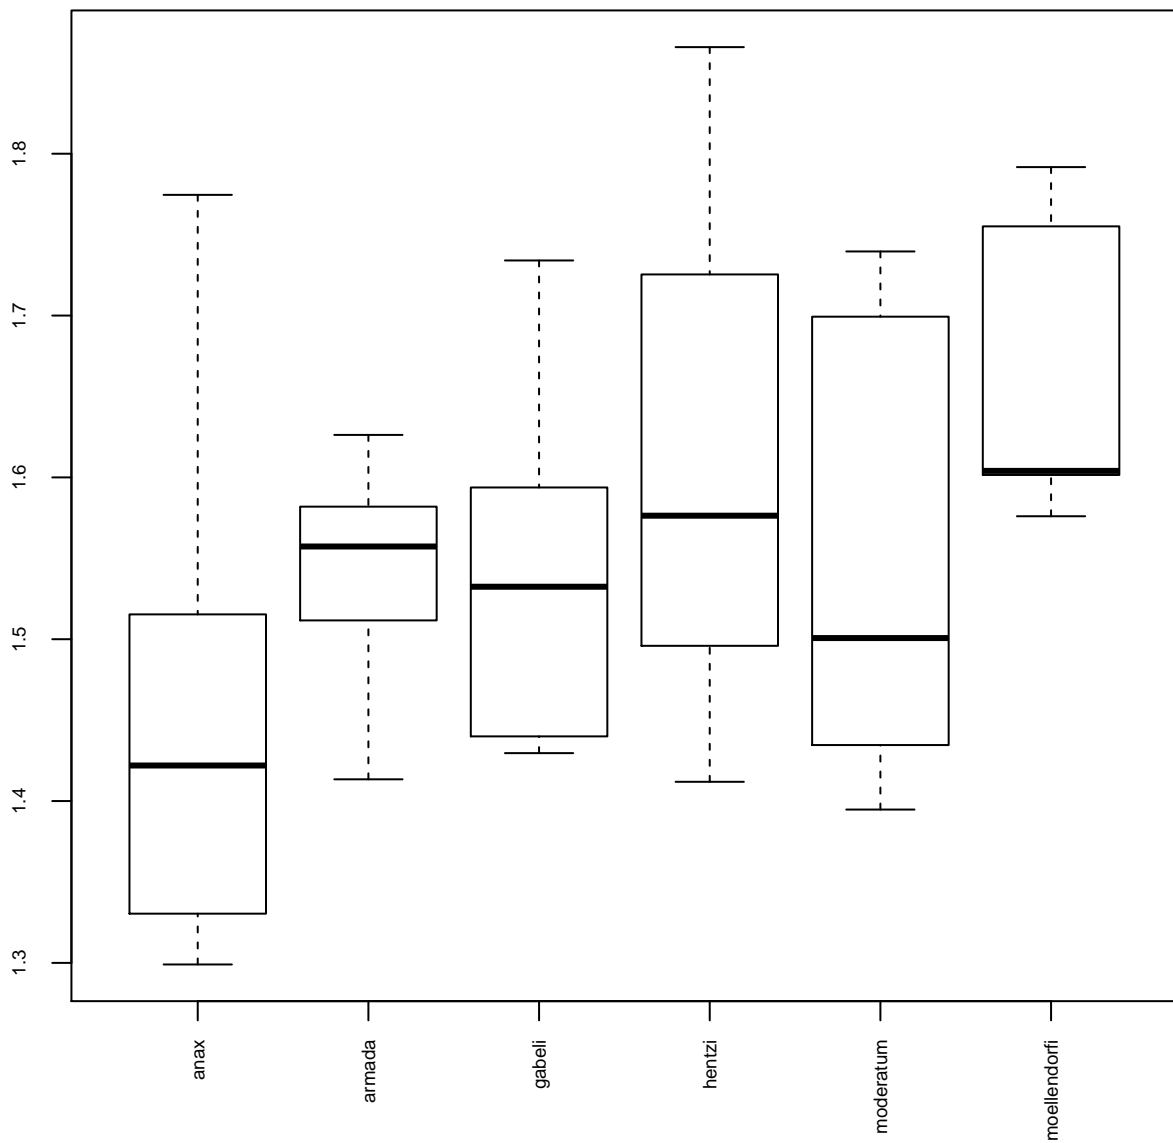

Supplement: Supplementary file 440

## Femur 4/Metatarsus 4 ratio – males

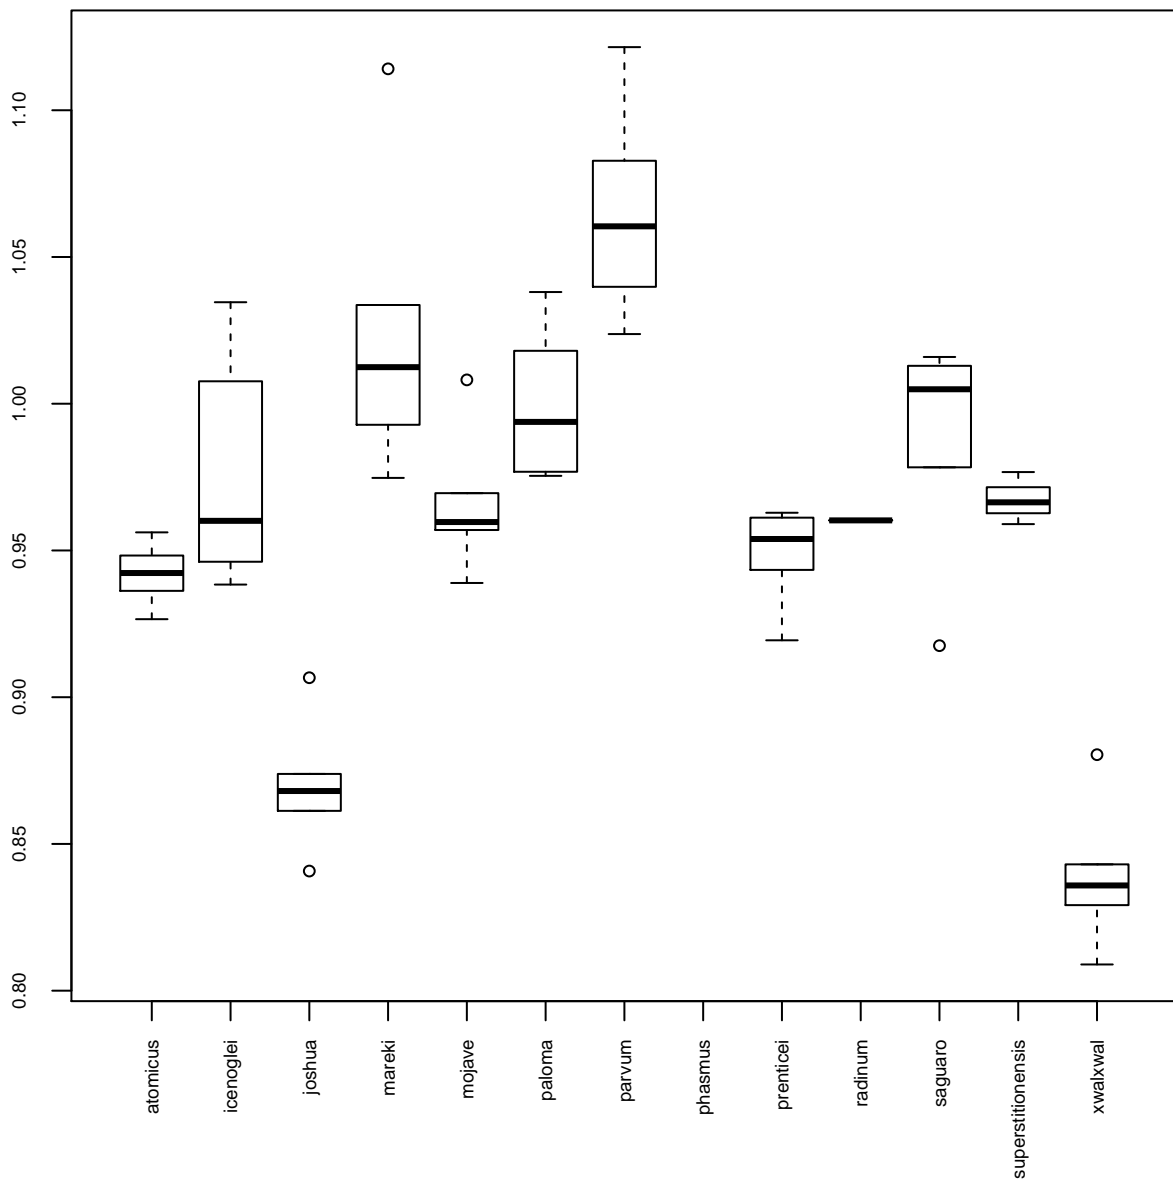

Supplement: Supplementary file 441

## Femur 1/Metatarsus 1 ratio – females

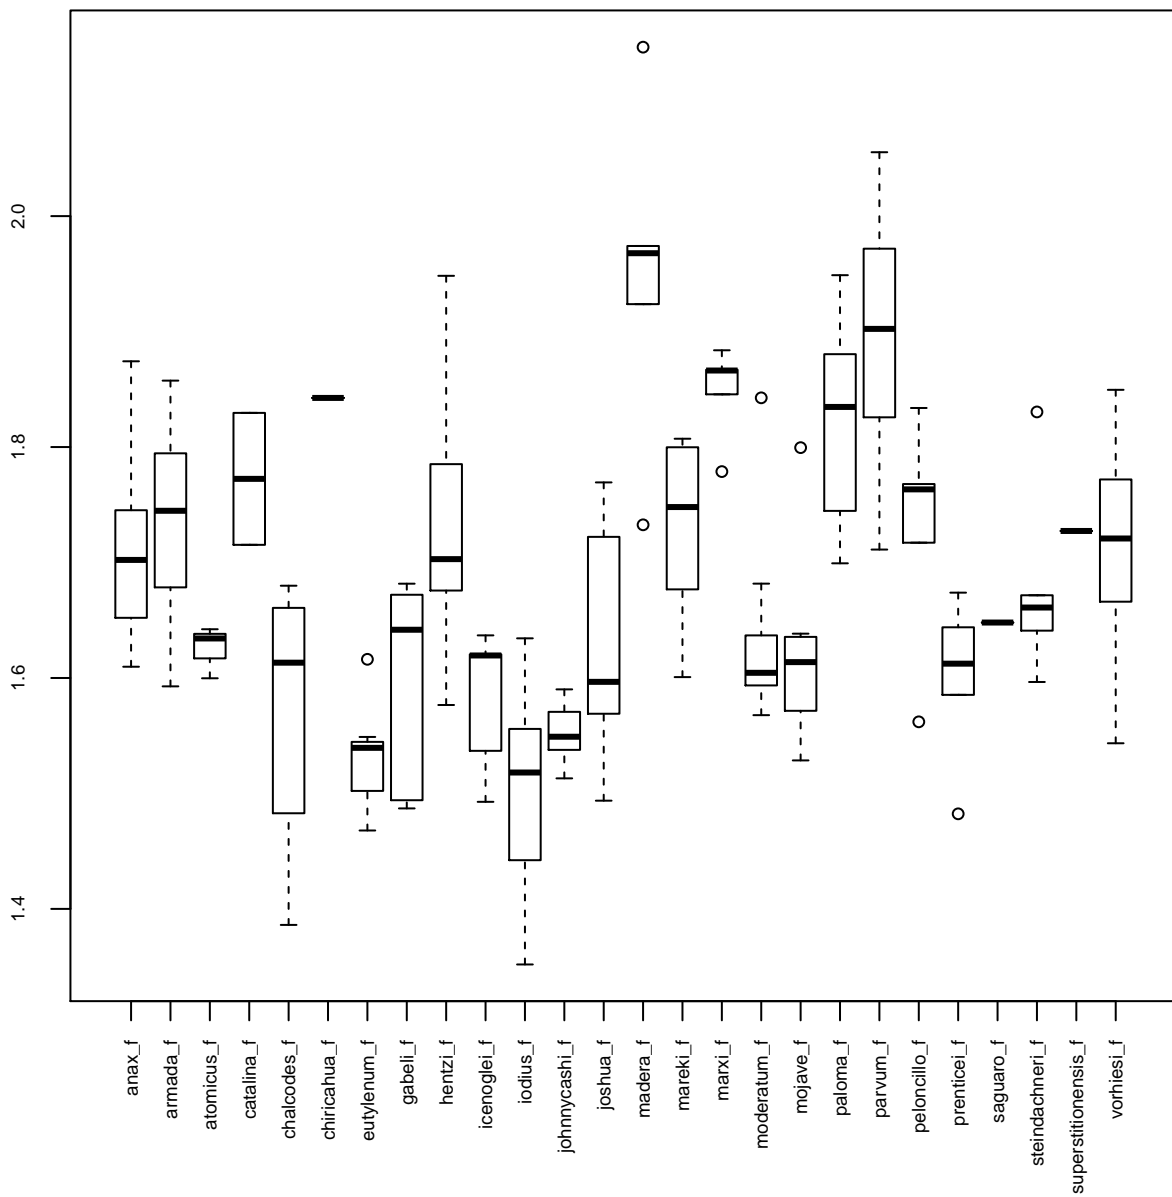

Supplement: Supplementary file 442

# Leg 3 Length/Carapace Length ratio – females

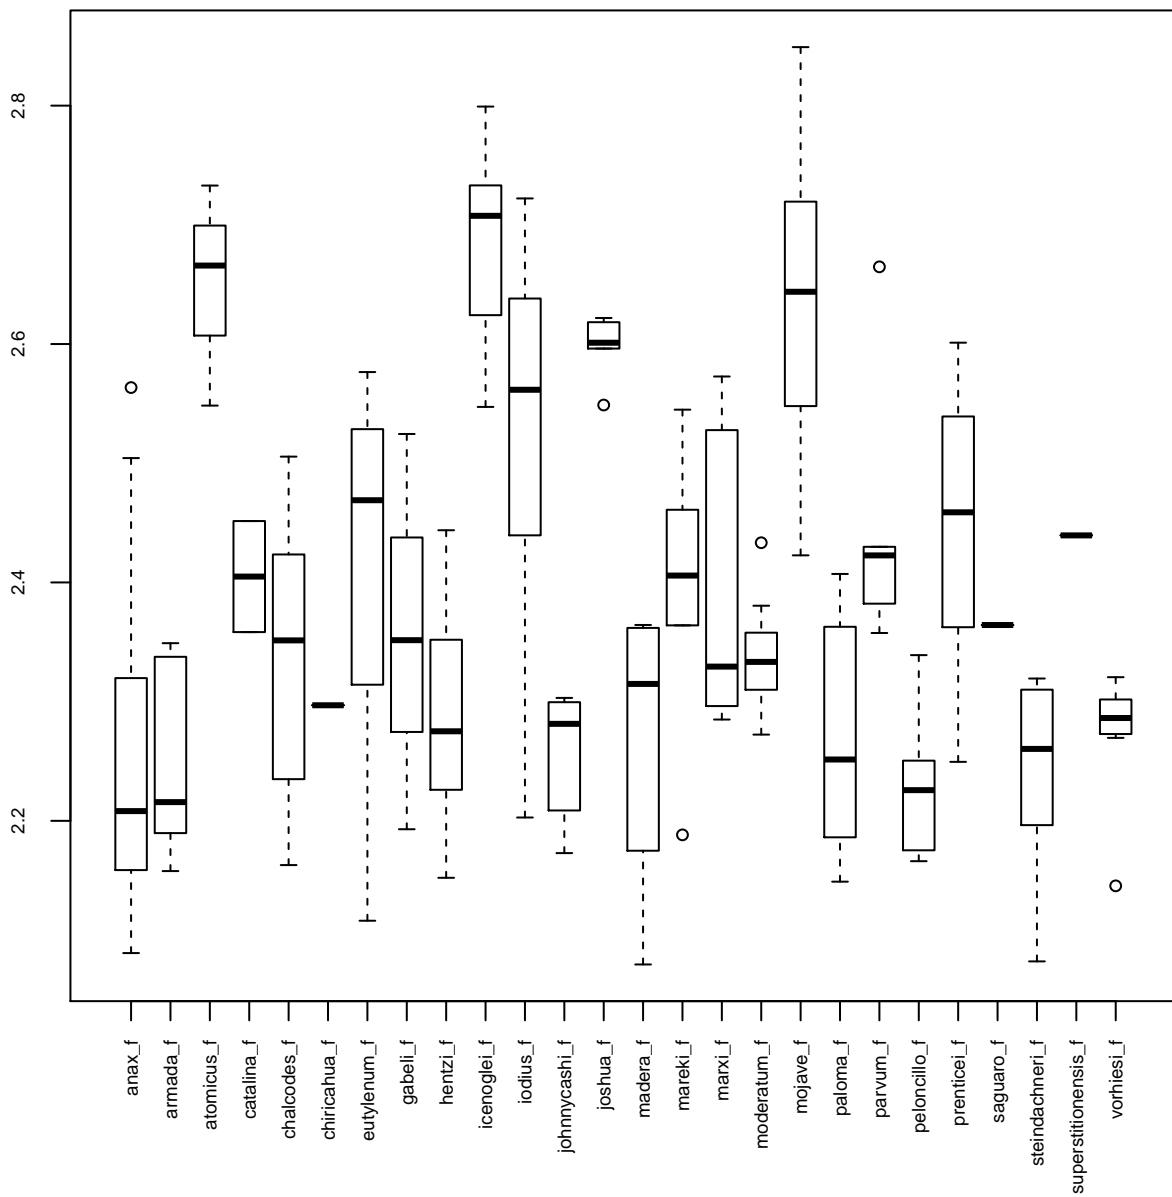

Supplement: Supplementary file 443

## Femur 1/Metatarsus 3 ratio – females

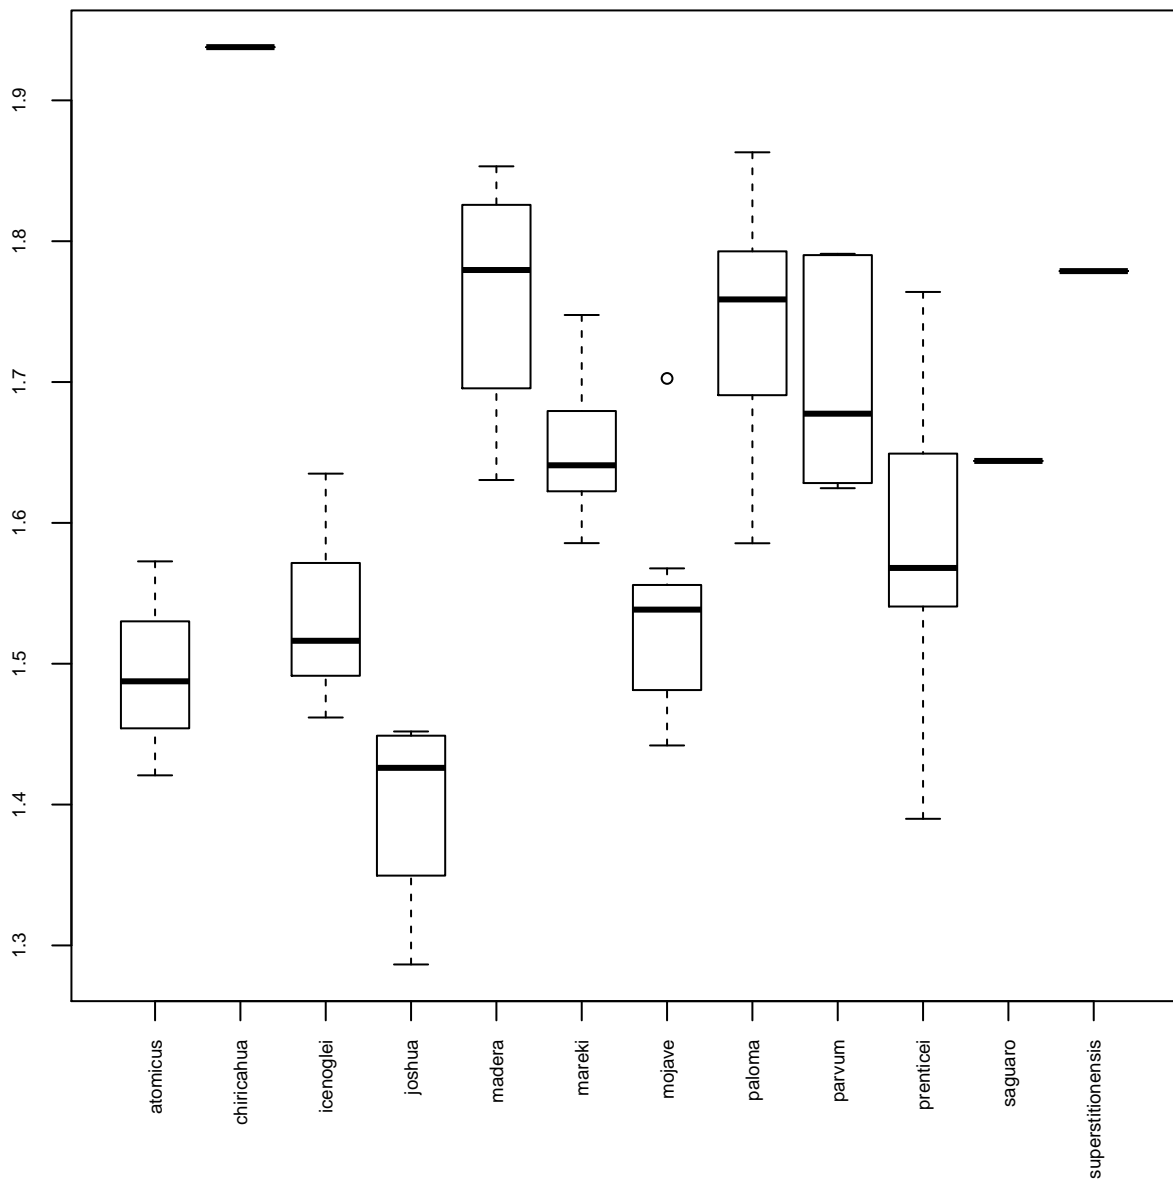

Supplement: Supplementary file 444

# Leg 1 Length – males

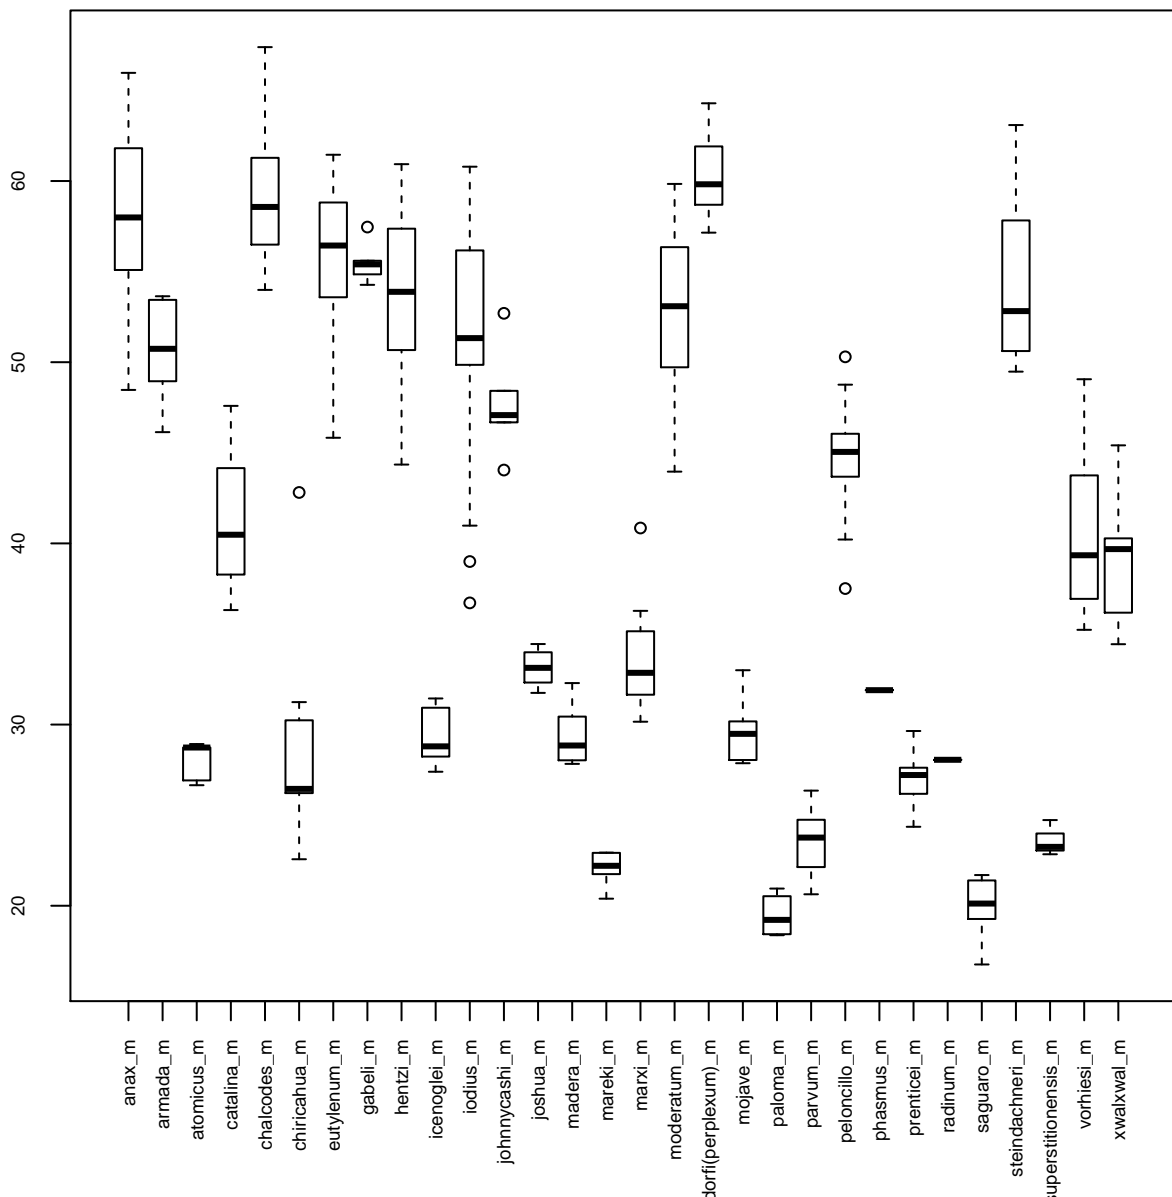

Supplement: Supplementary file 445

# Tarsus 3/Patella 4 Length ratio – males

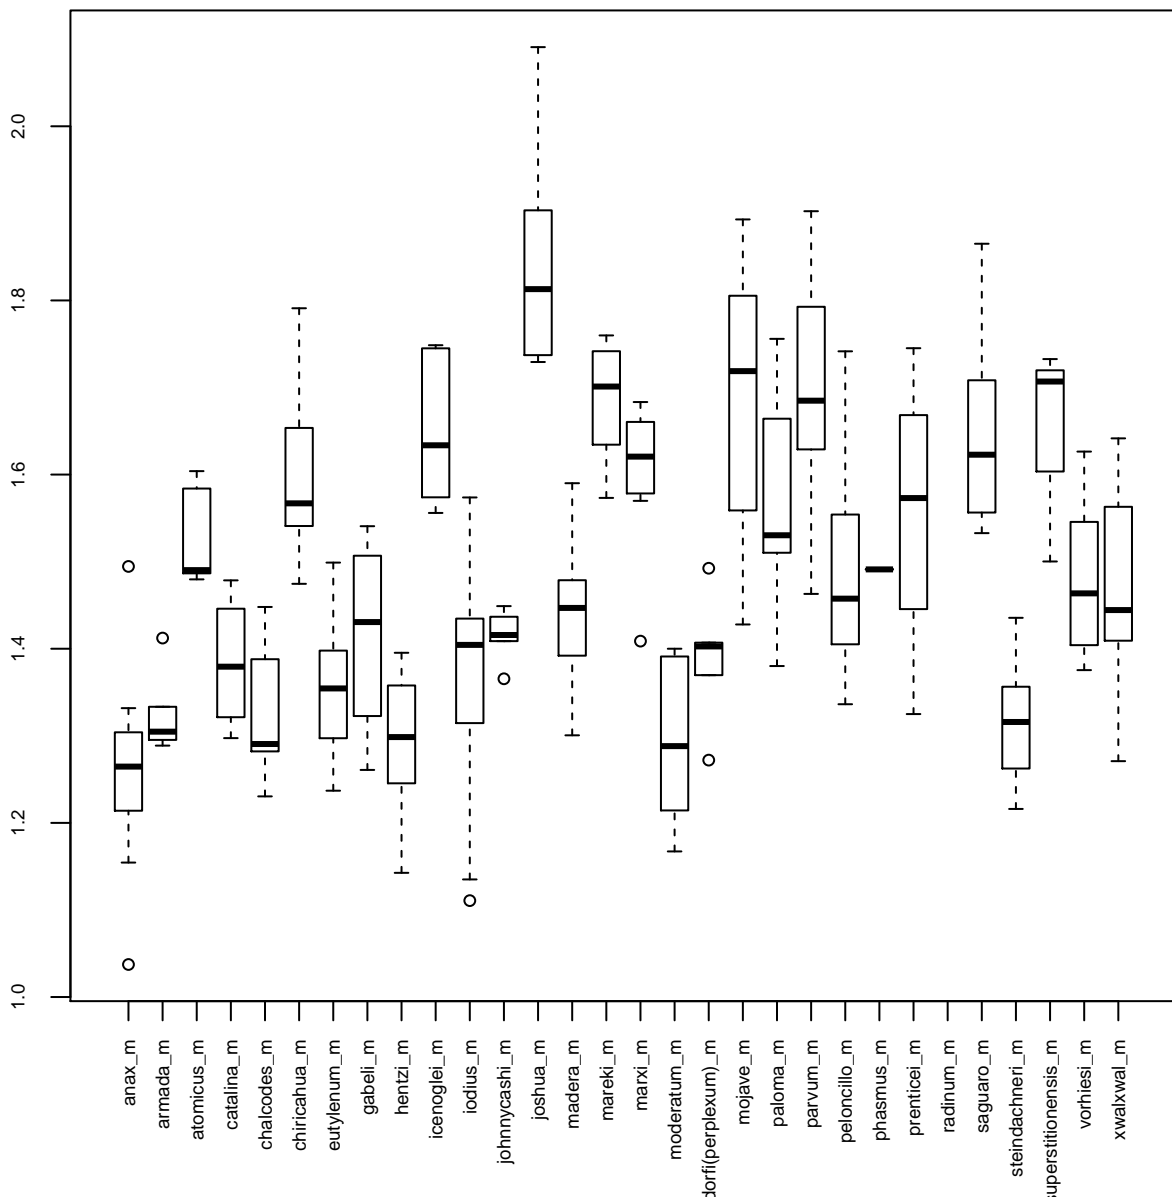

Supplement: Supplementary file 446

## Tarsus 1/Femur 4 Length ratio – females

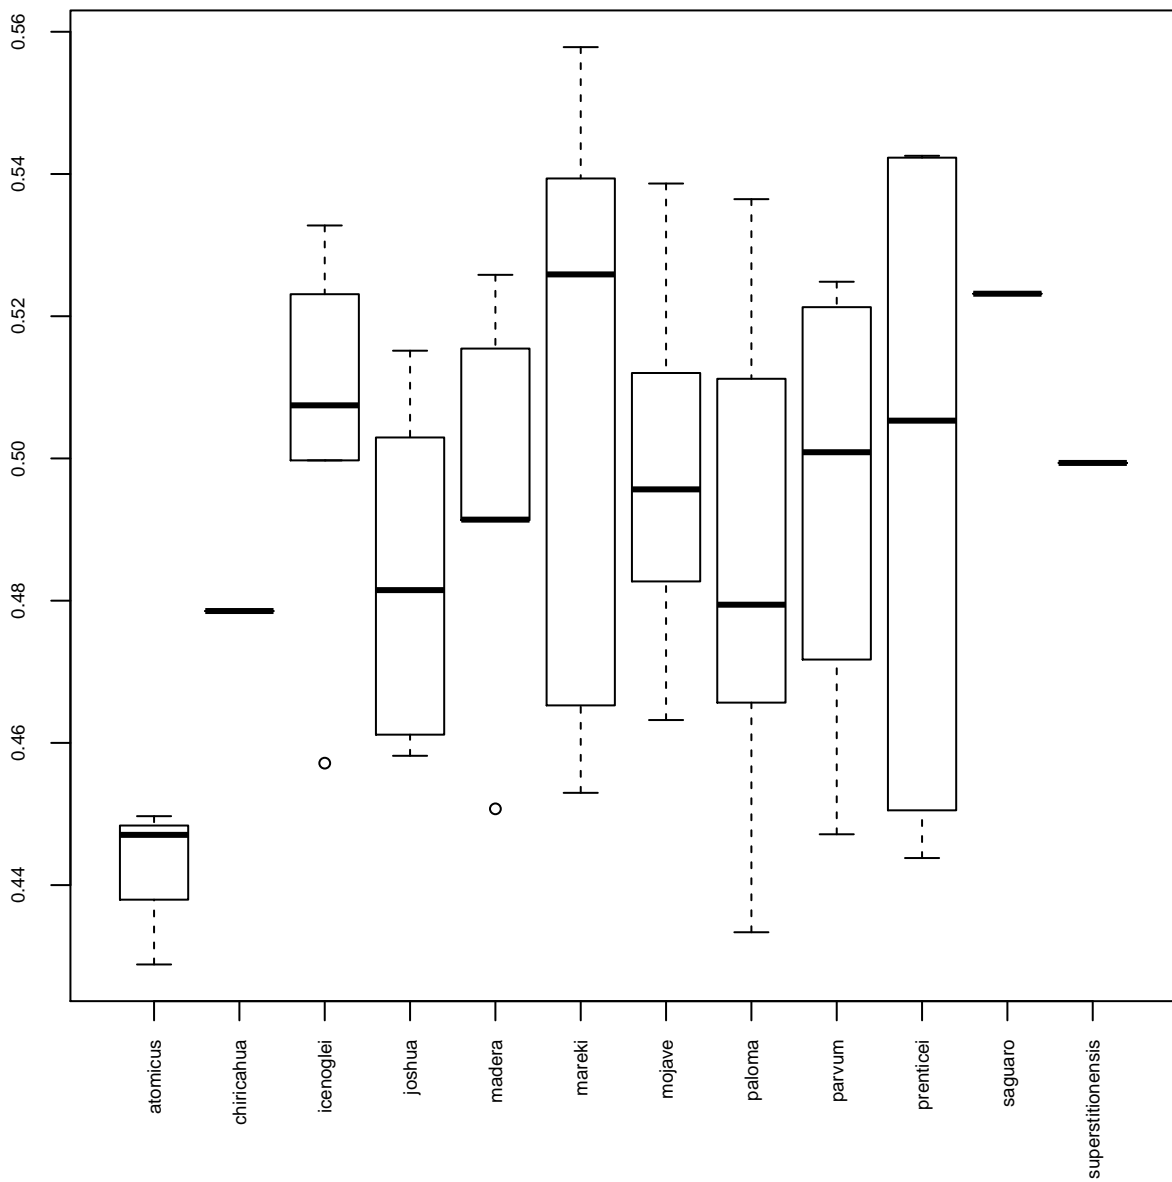

Supplement: Supplementary file 447

## Patella 1/Tarsus 4 Length ratio – males

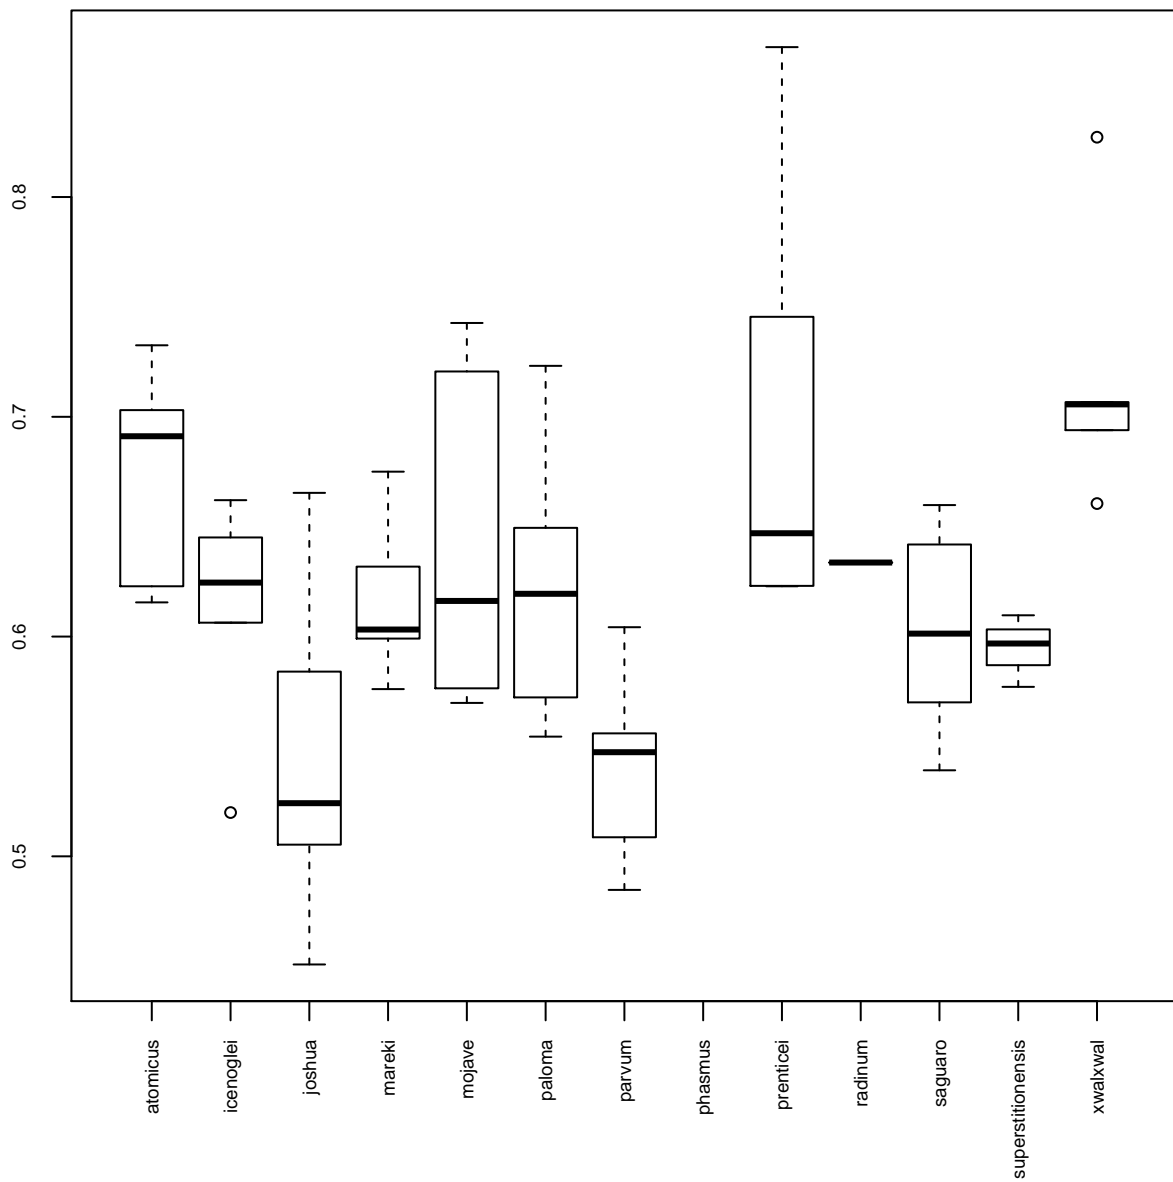

Supplement: Supplementary file 448

## Femur 3/Tibia 3 ratio – males

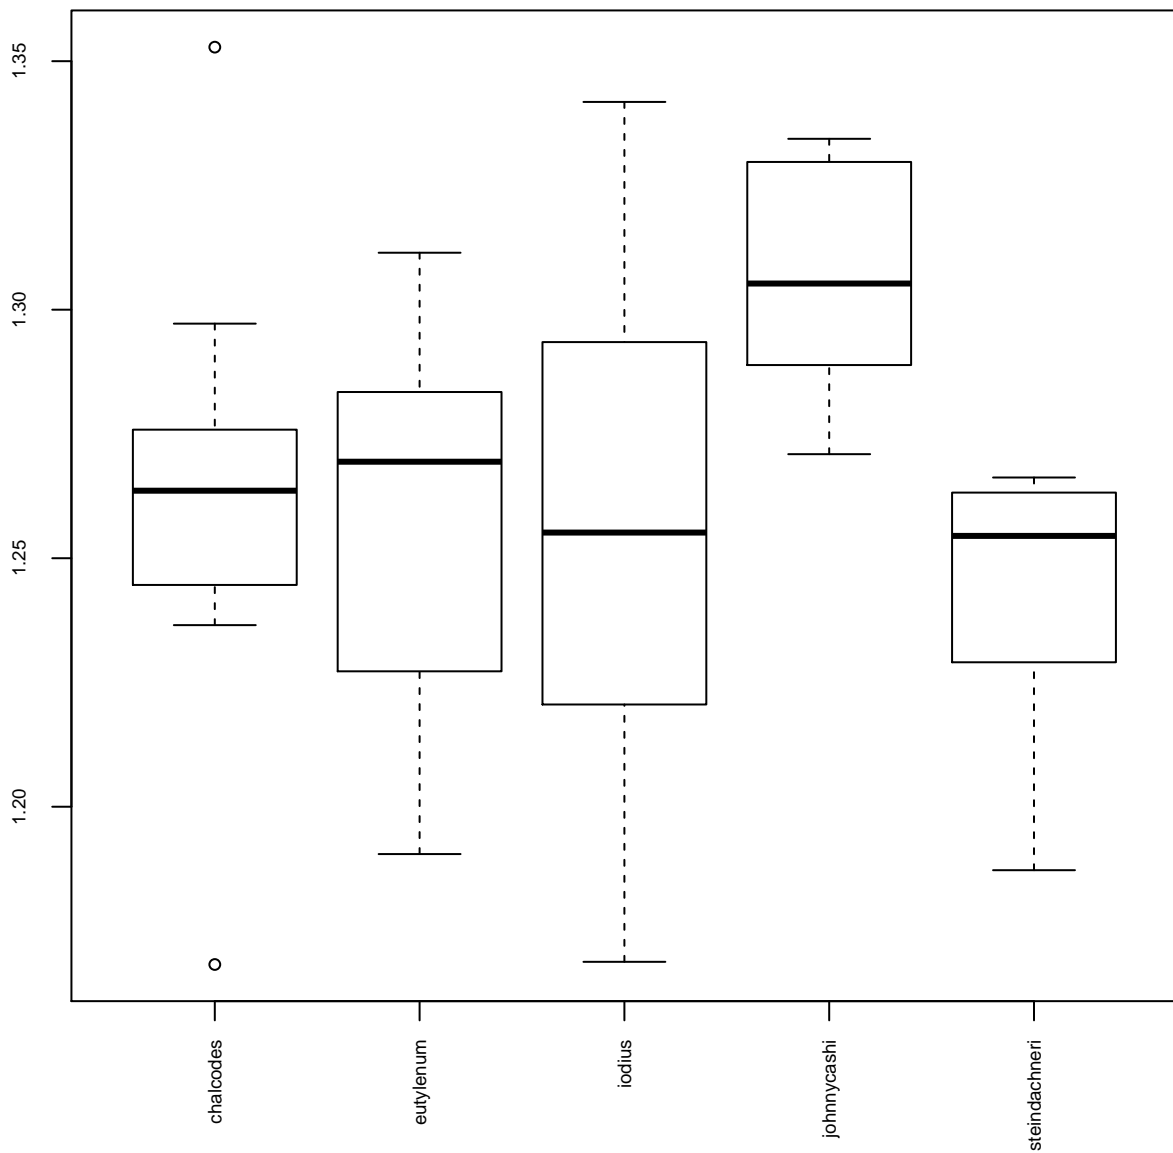

Supplement: Supplementary file 449

## Leg 1/Leg 4 Length ratio – males

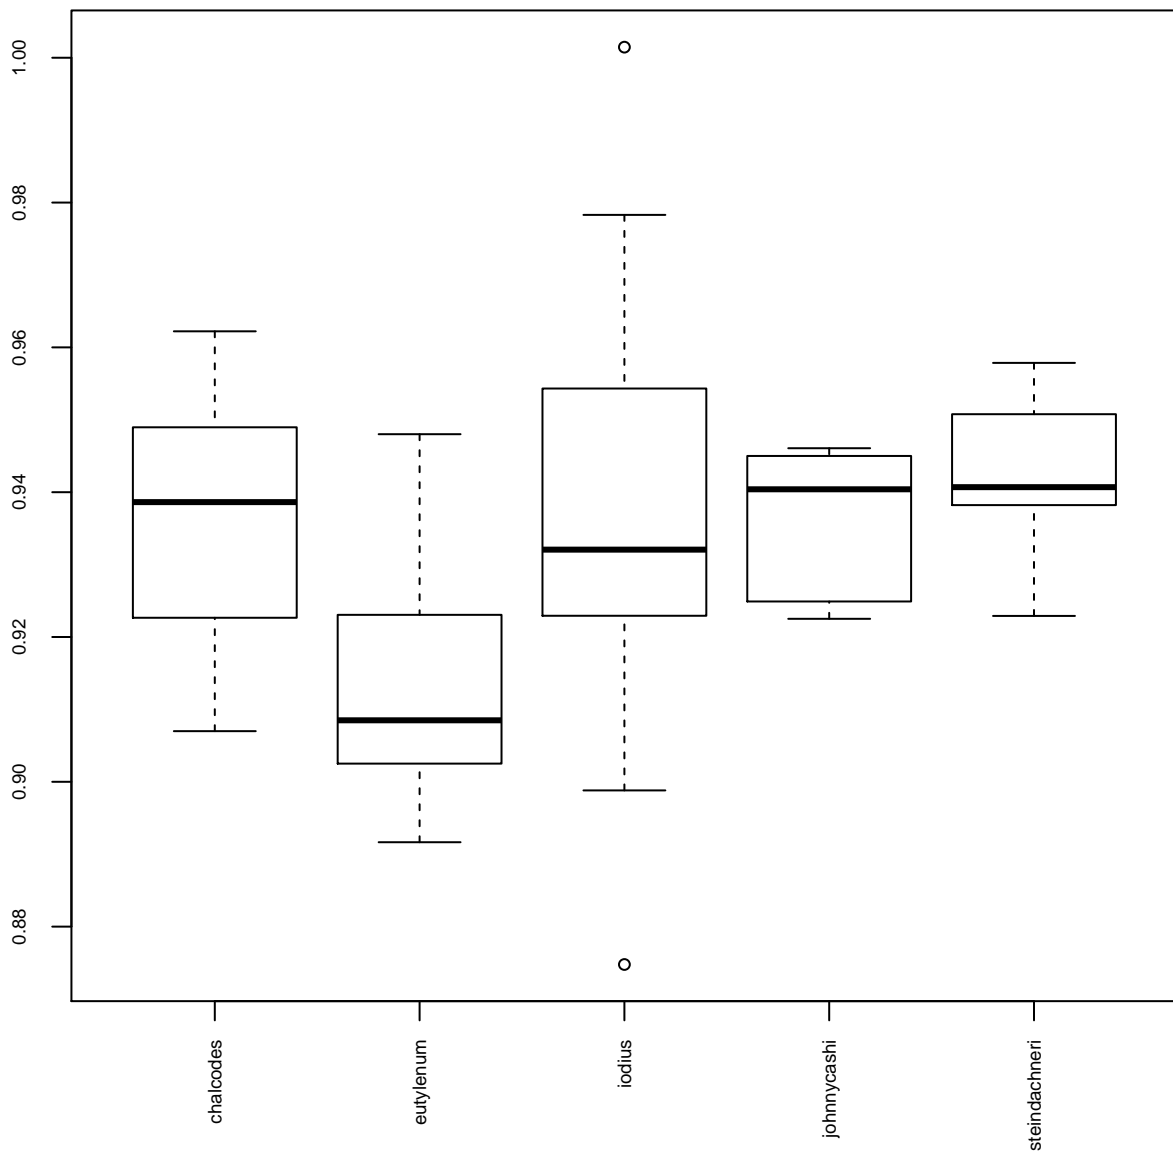

Supplement: Supplementary file 450

## Metatarsus 1/Tarsus 3 Length ratio – females

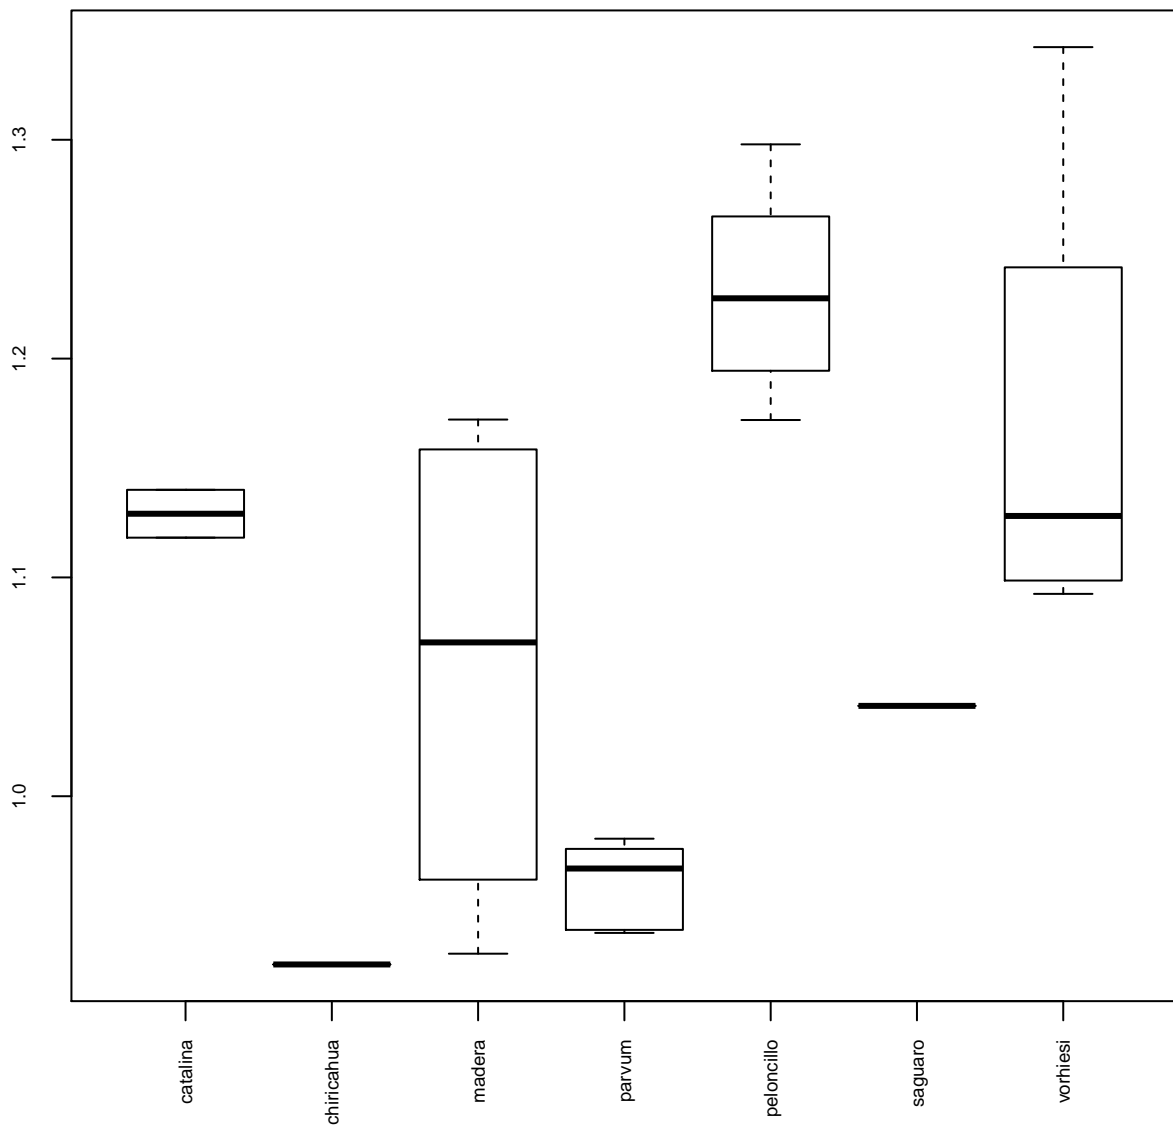

Supplement: Supplementary file 451

## Metatarsus 1/Metatarsus 4 ratio – males

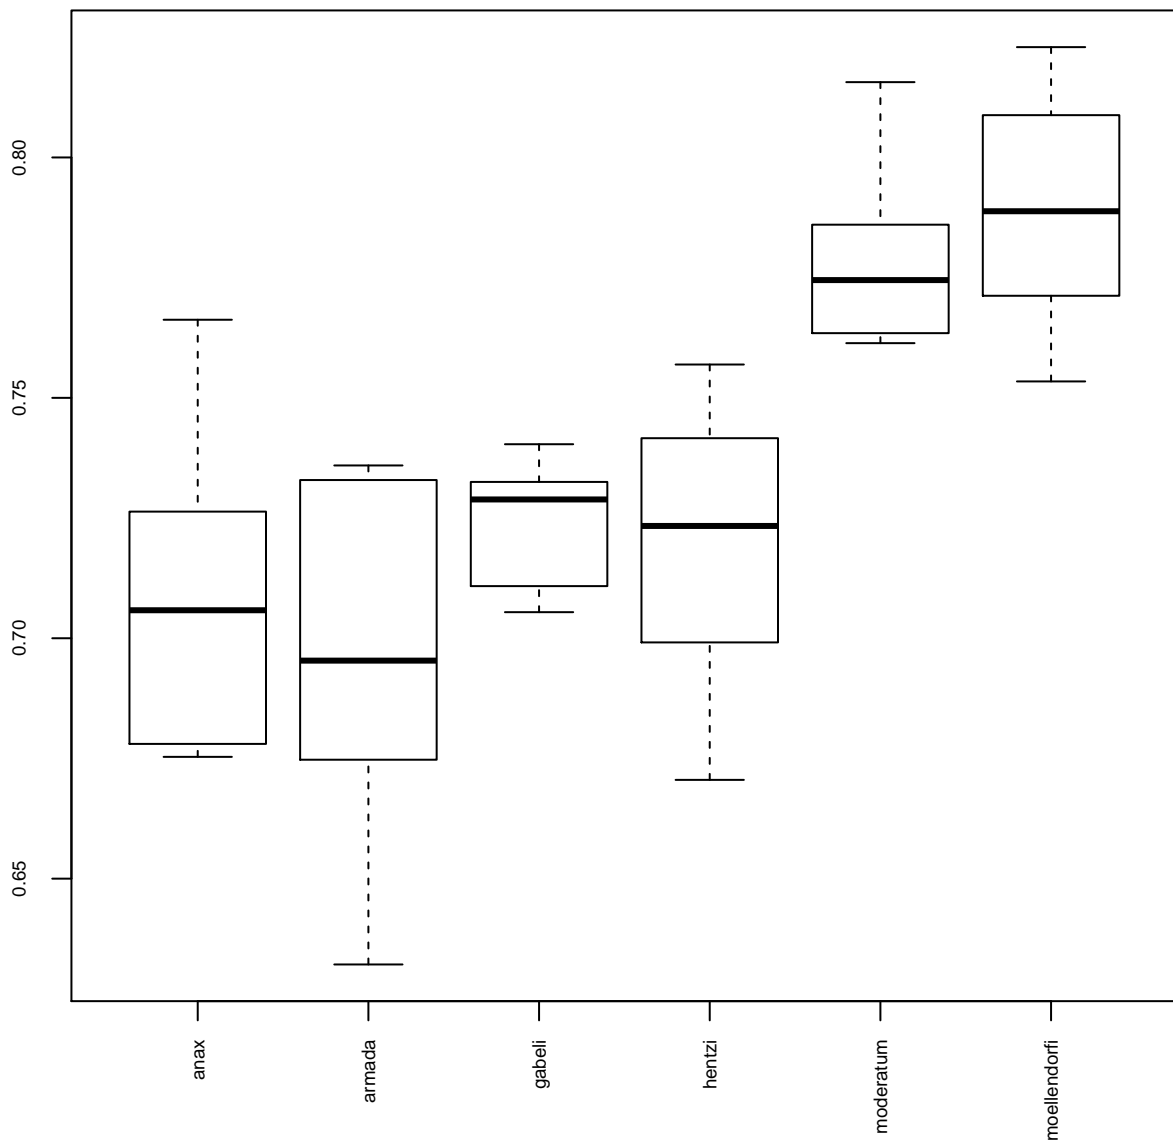

Supplement: Supplementary file 452

## Leg 3 Length/Carapace Length ratio – males

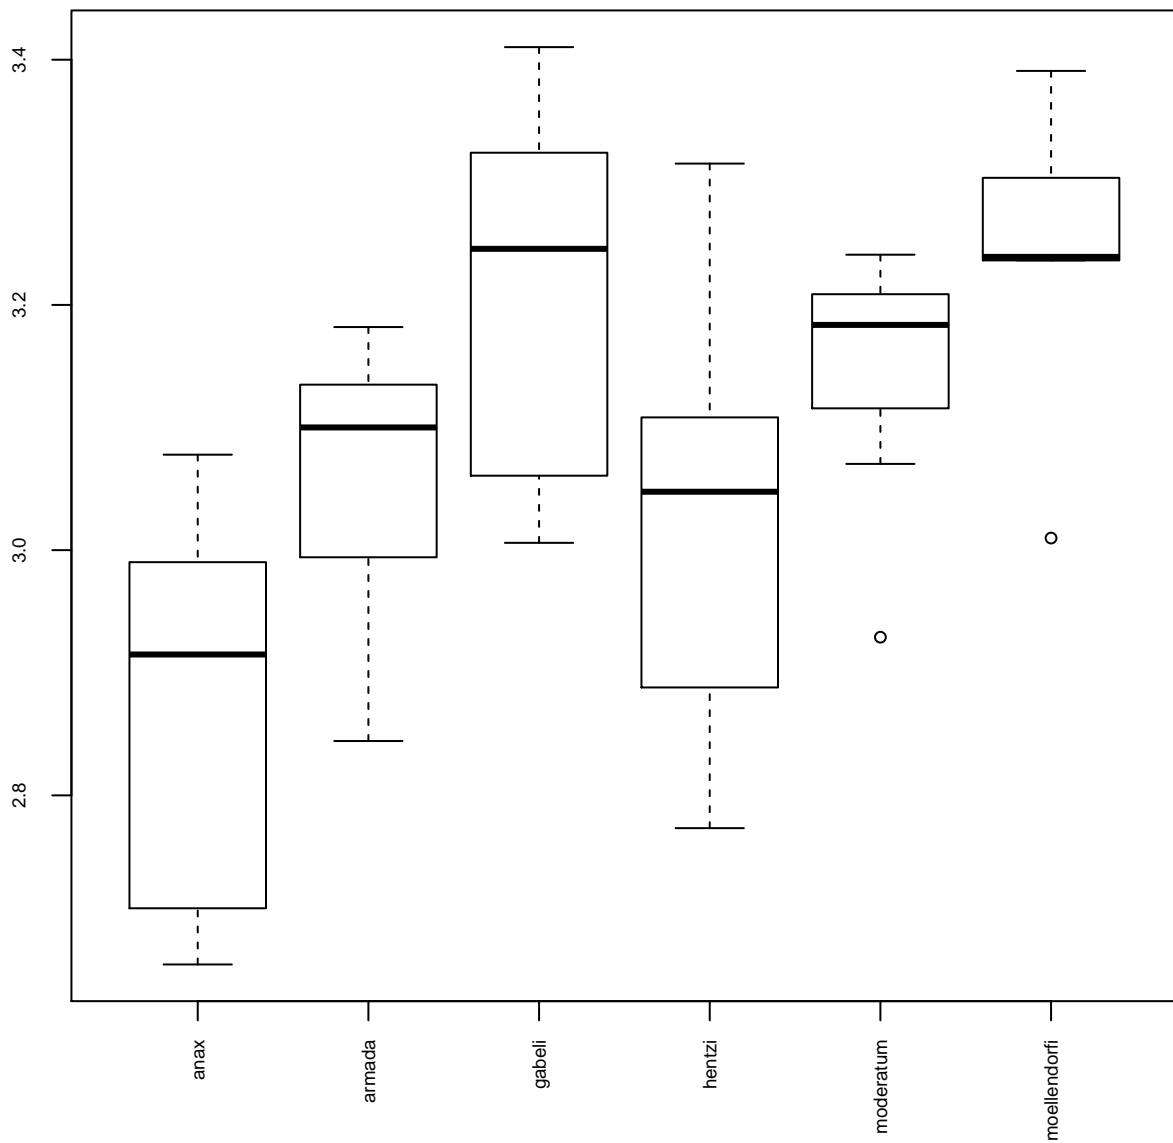

Supplement: Supplementary file 453

## Metatarsus 1/Metatarsus 3 ratio – females

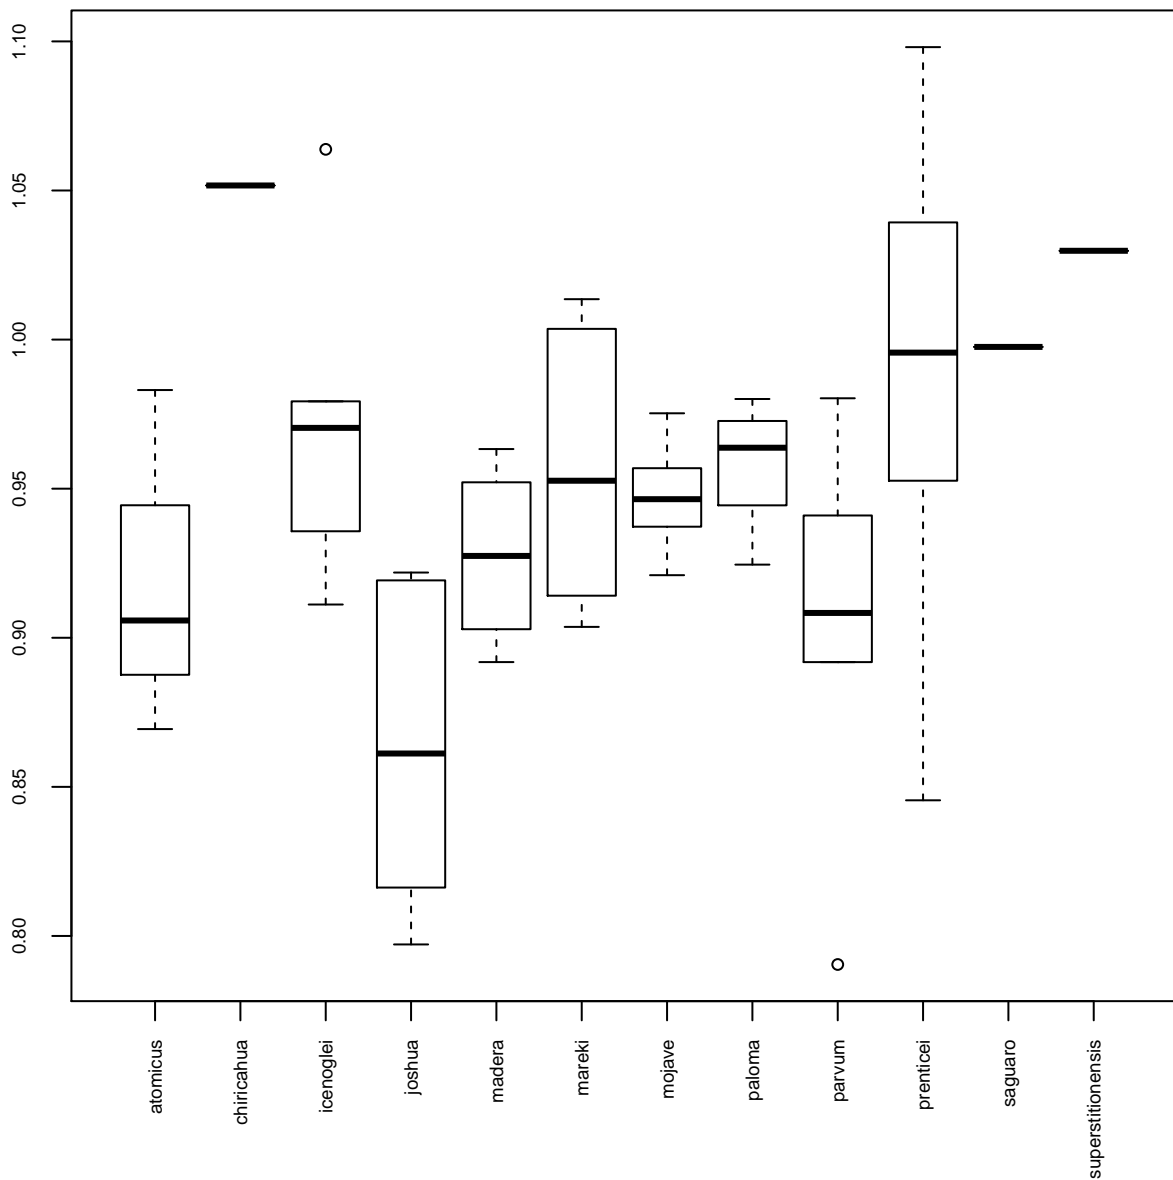

Supplement: Supplementary file 454

## Femur 3/Tibia 3 ratio – males

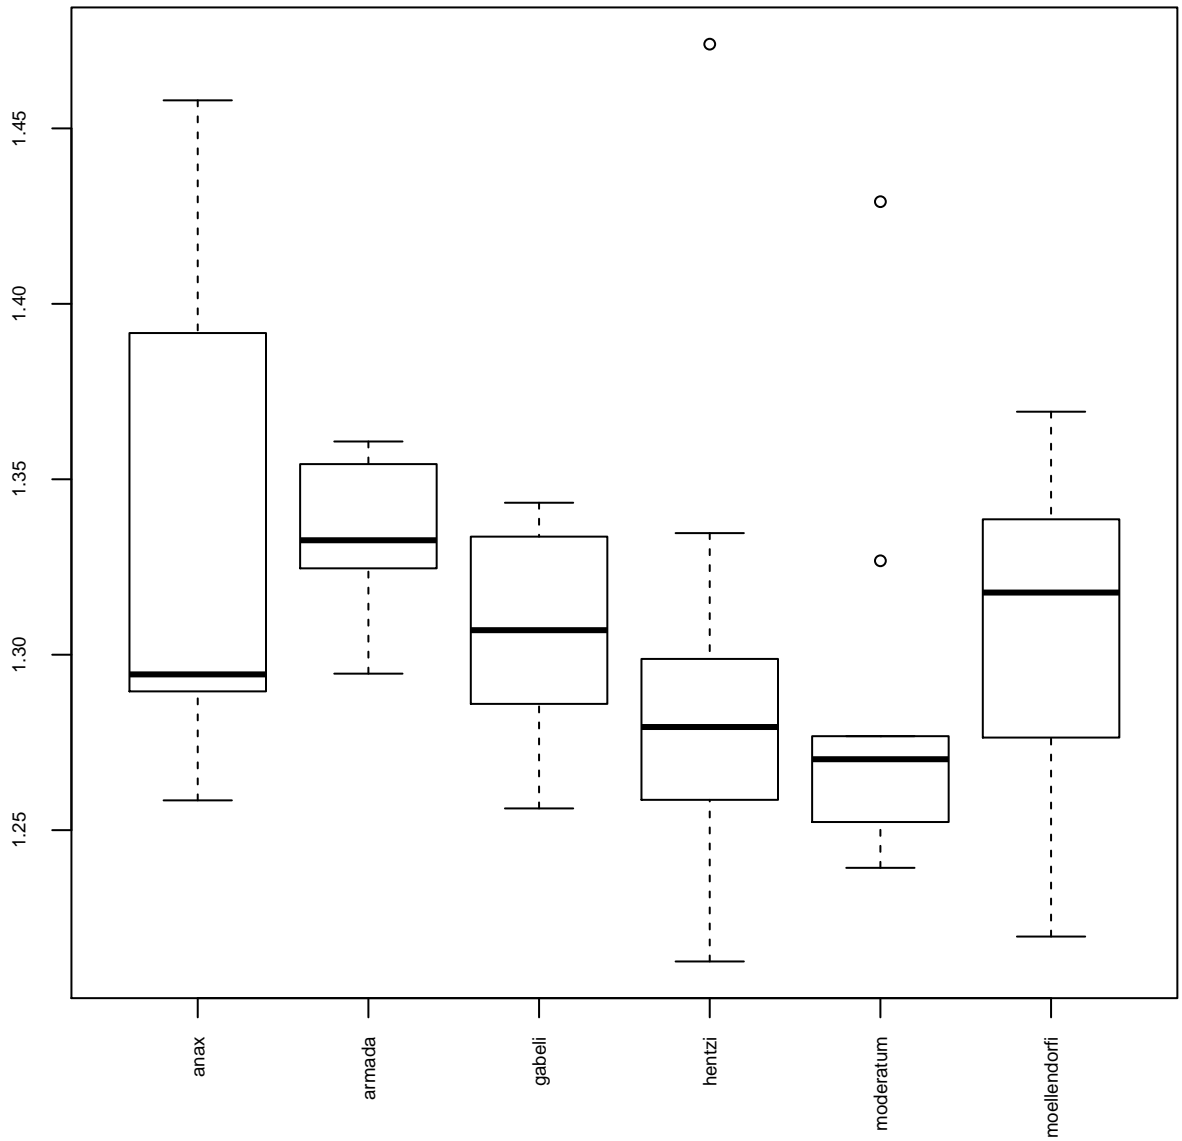

Supplement: Supplementary file 455

# Patella 3/Metatarsus 3 ratio – males

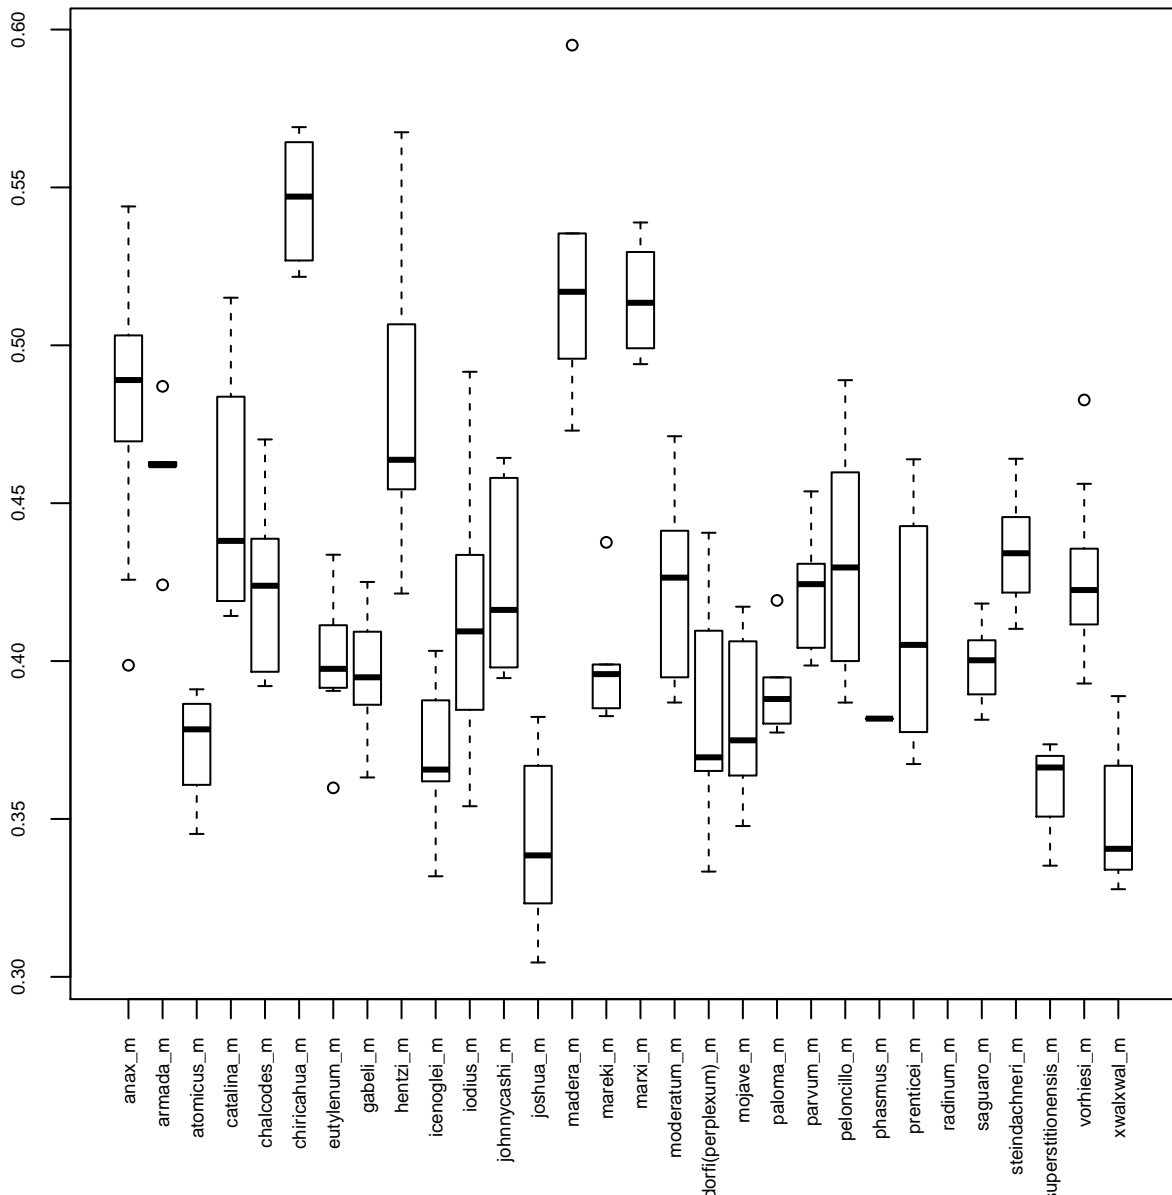

Supplement: Supplementary file 456

## Femur 1/Patella 4 ratio – females

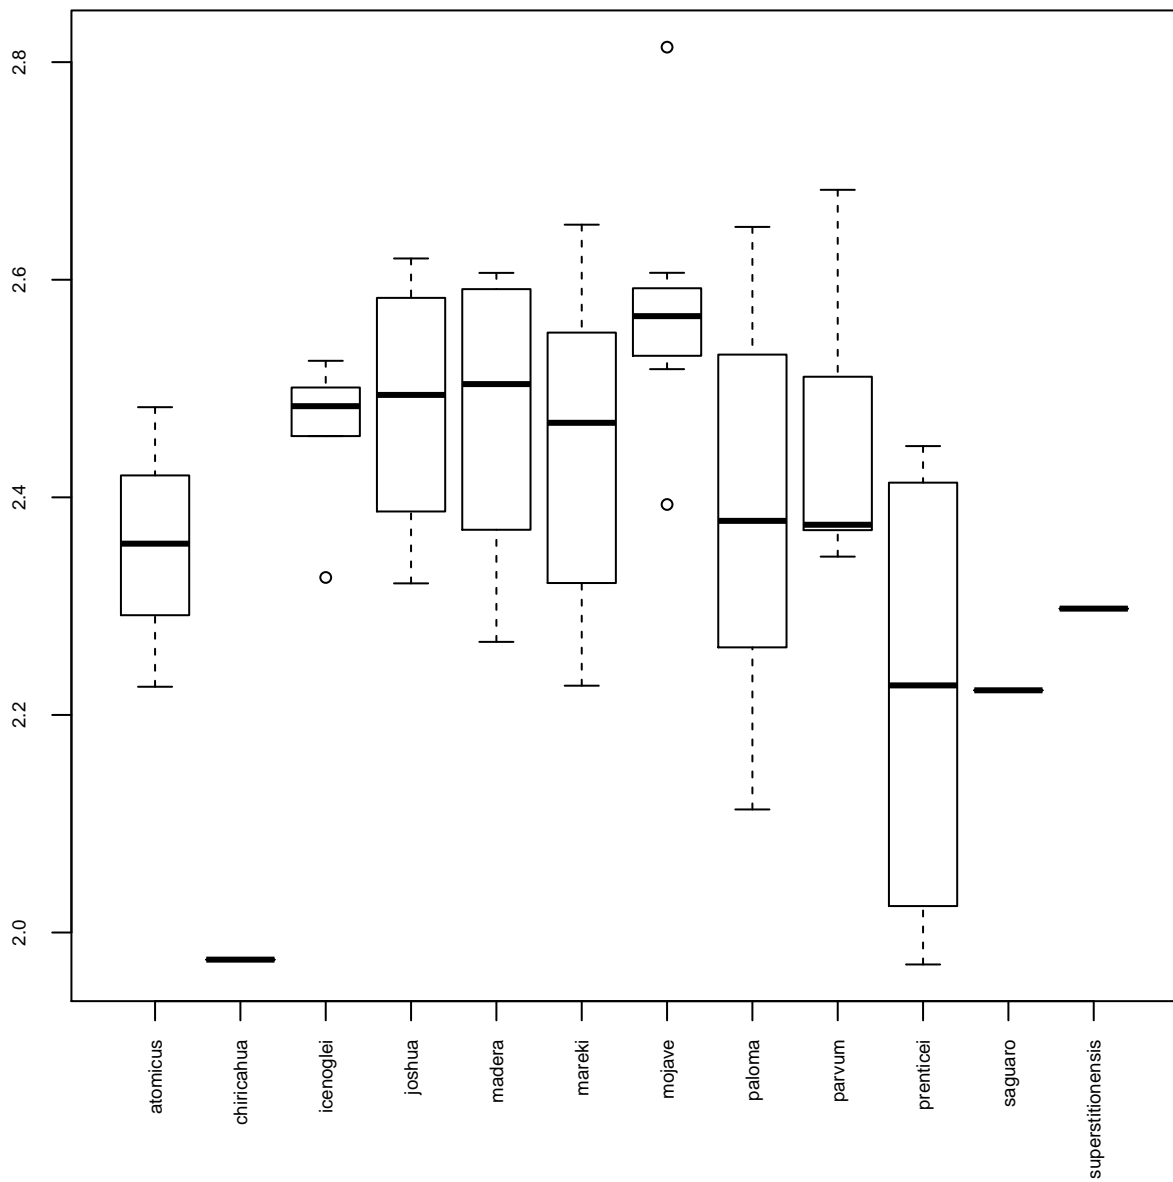

Supplement: Supplementary file 457

# Femur 4/Tibia 4 ratio – females

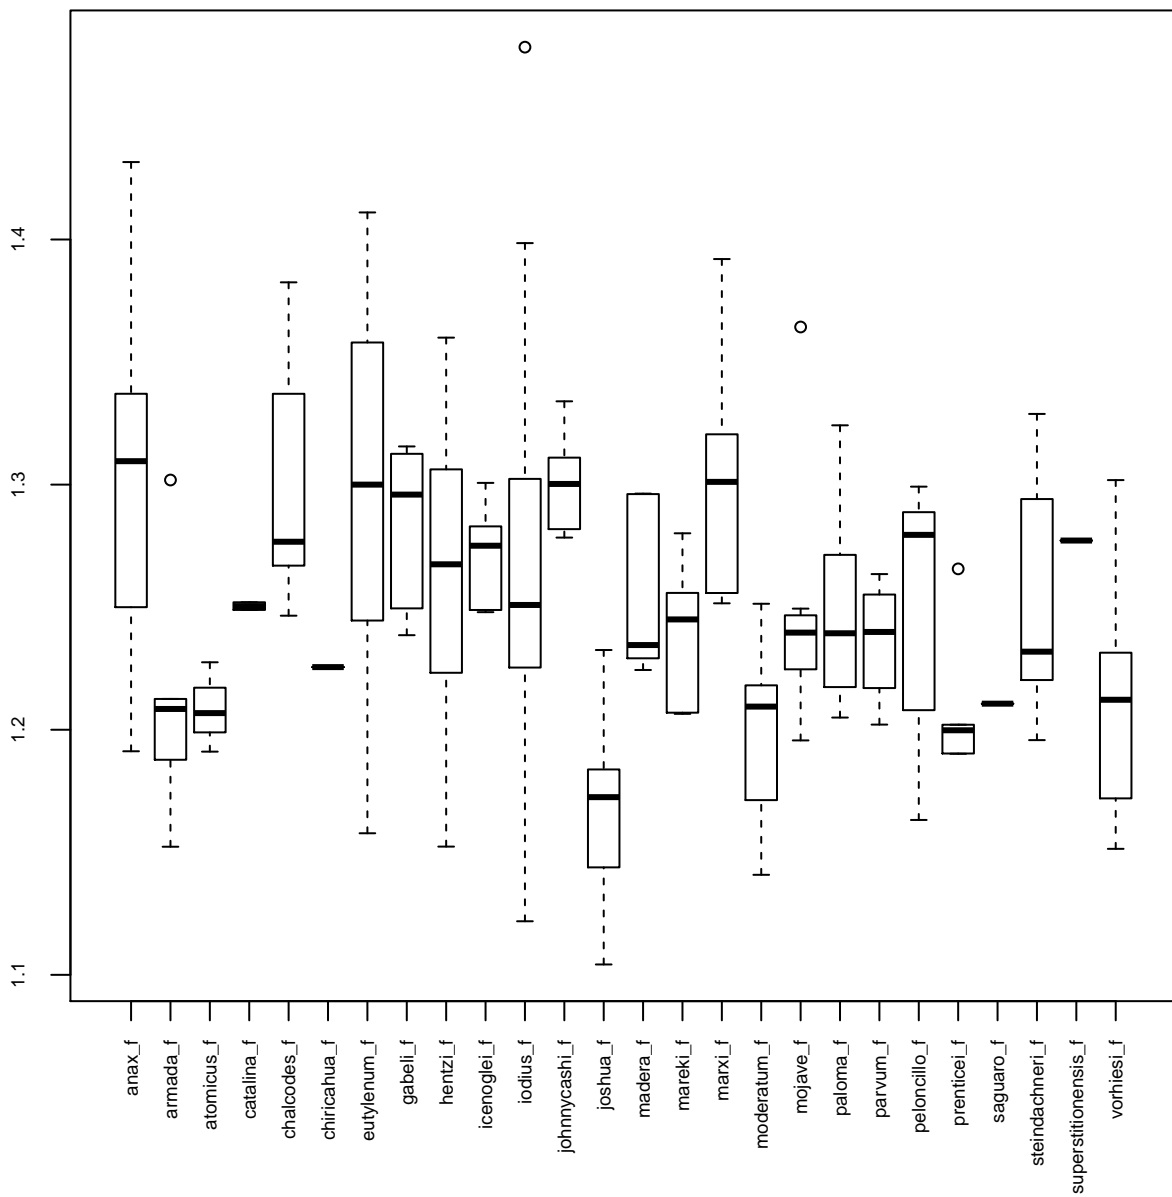

Supplement: Supplementary file 458

## Metatarsus 1/Metatarsus 3 ratio – females

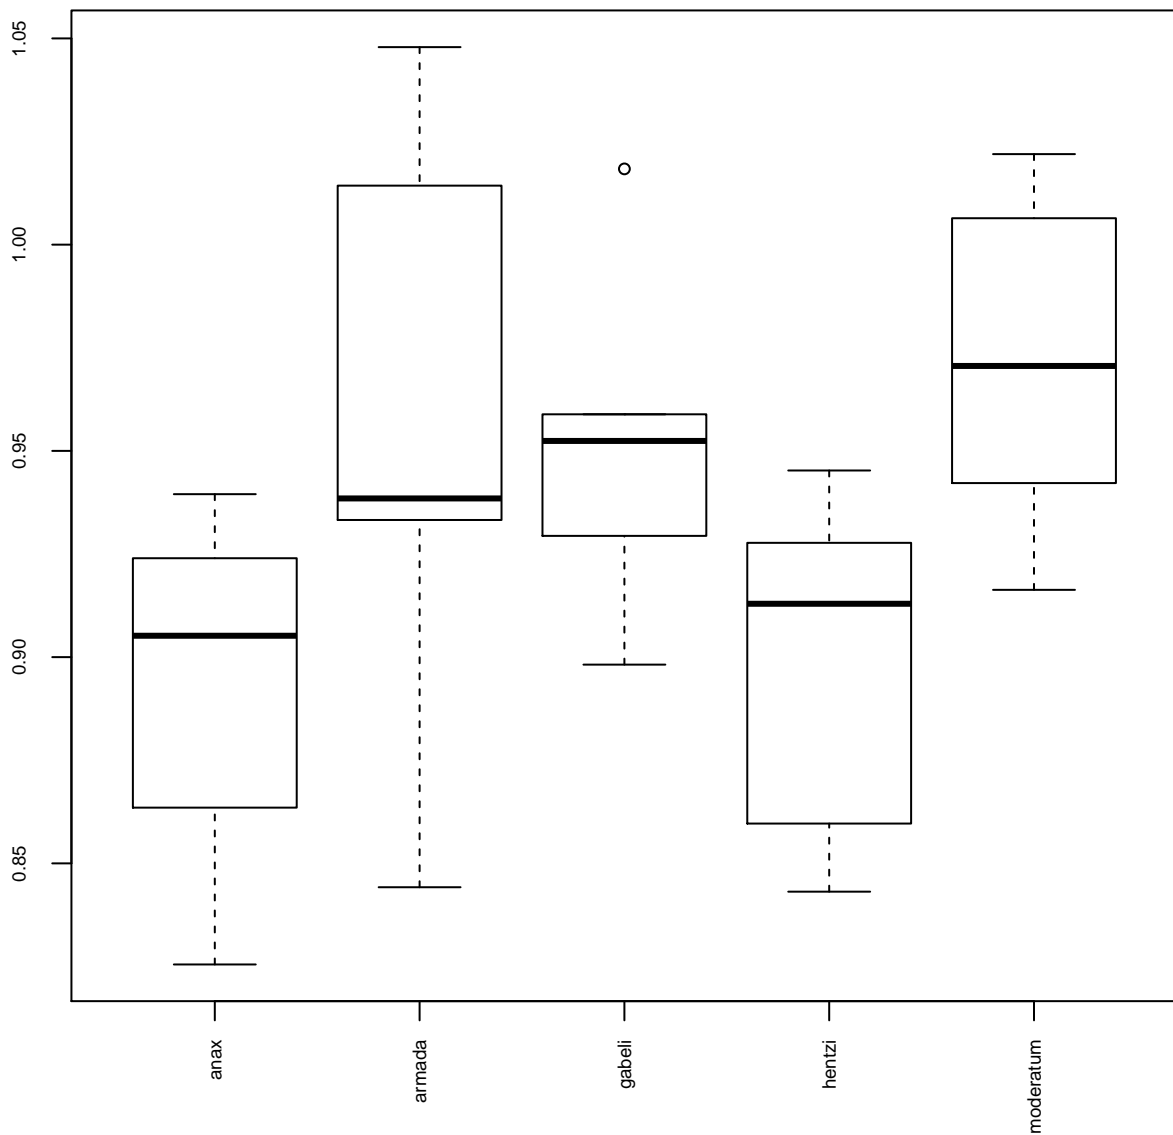

Supplement: Supplementary file 459

## Femur 3/Tibia 3 ratio – females

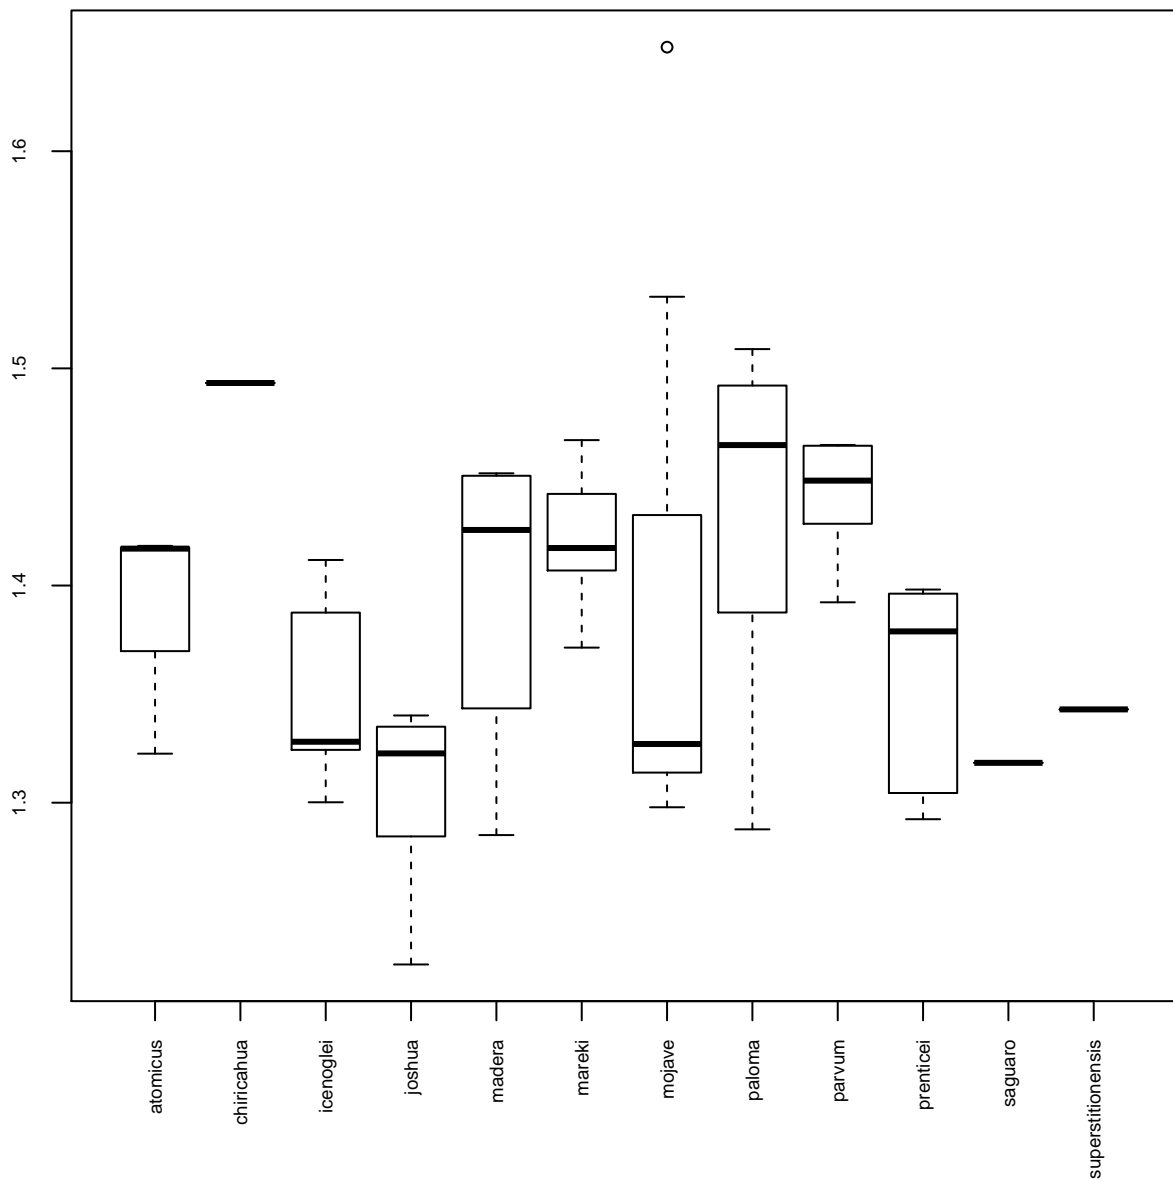

Supplement: Supplementary file 460

## Femur 3 Length/Width ratio – females

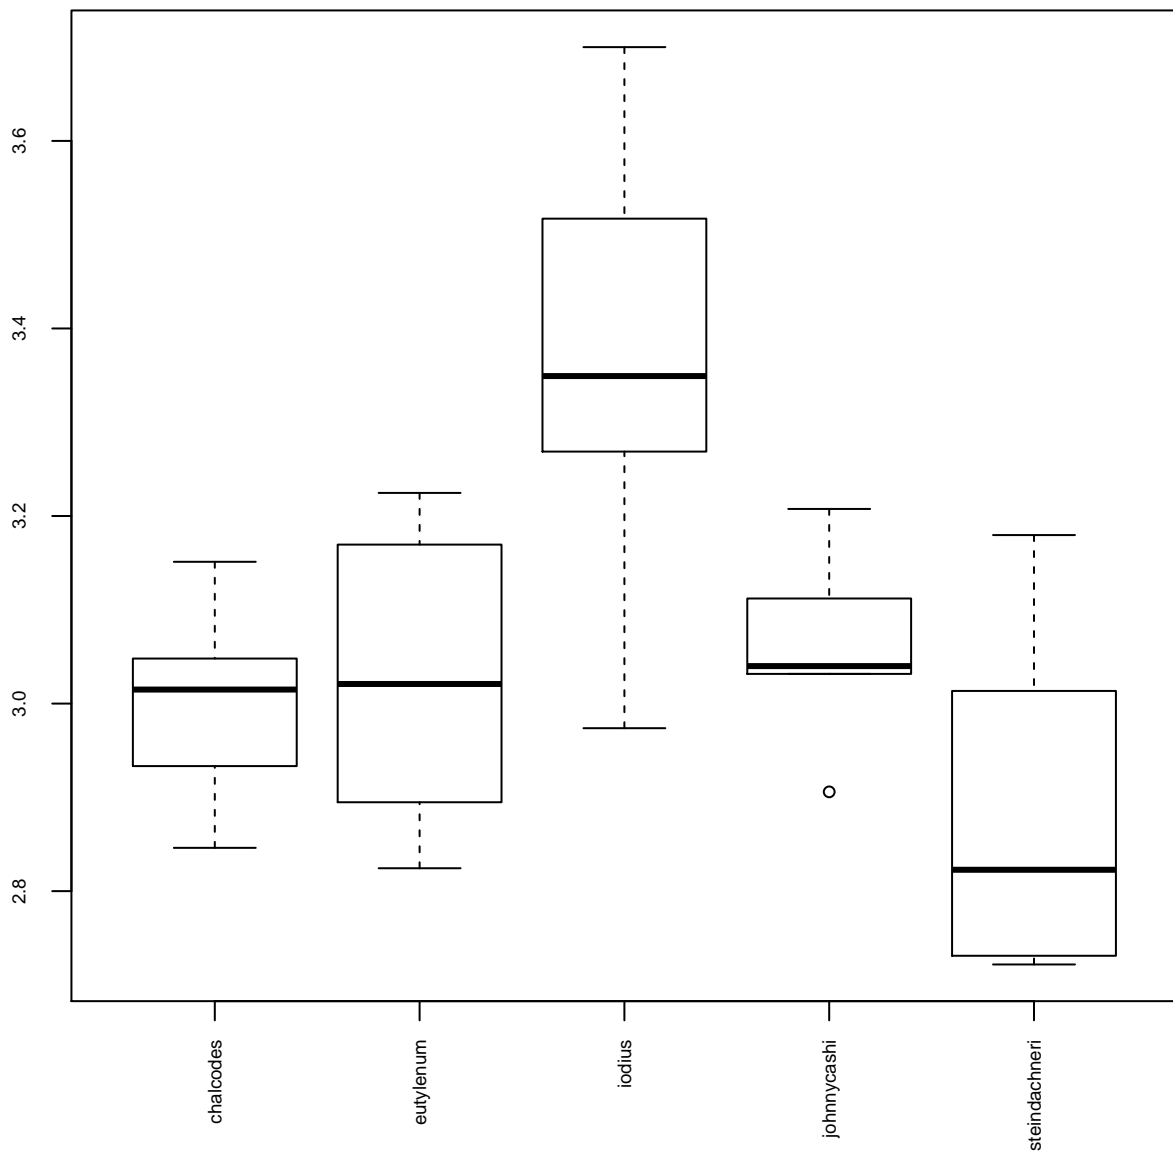

Supplement: Supplementary file 461

## Patella 3/Femur 4 Length ratio – females

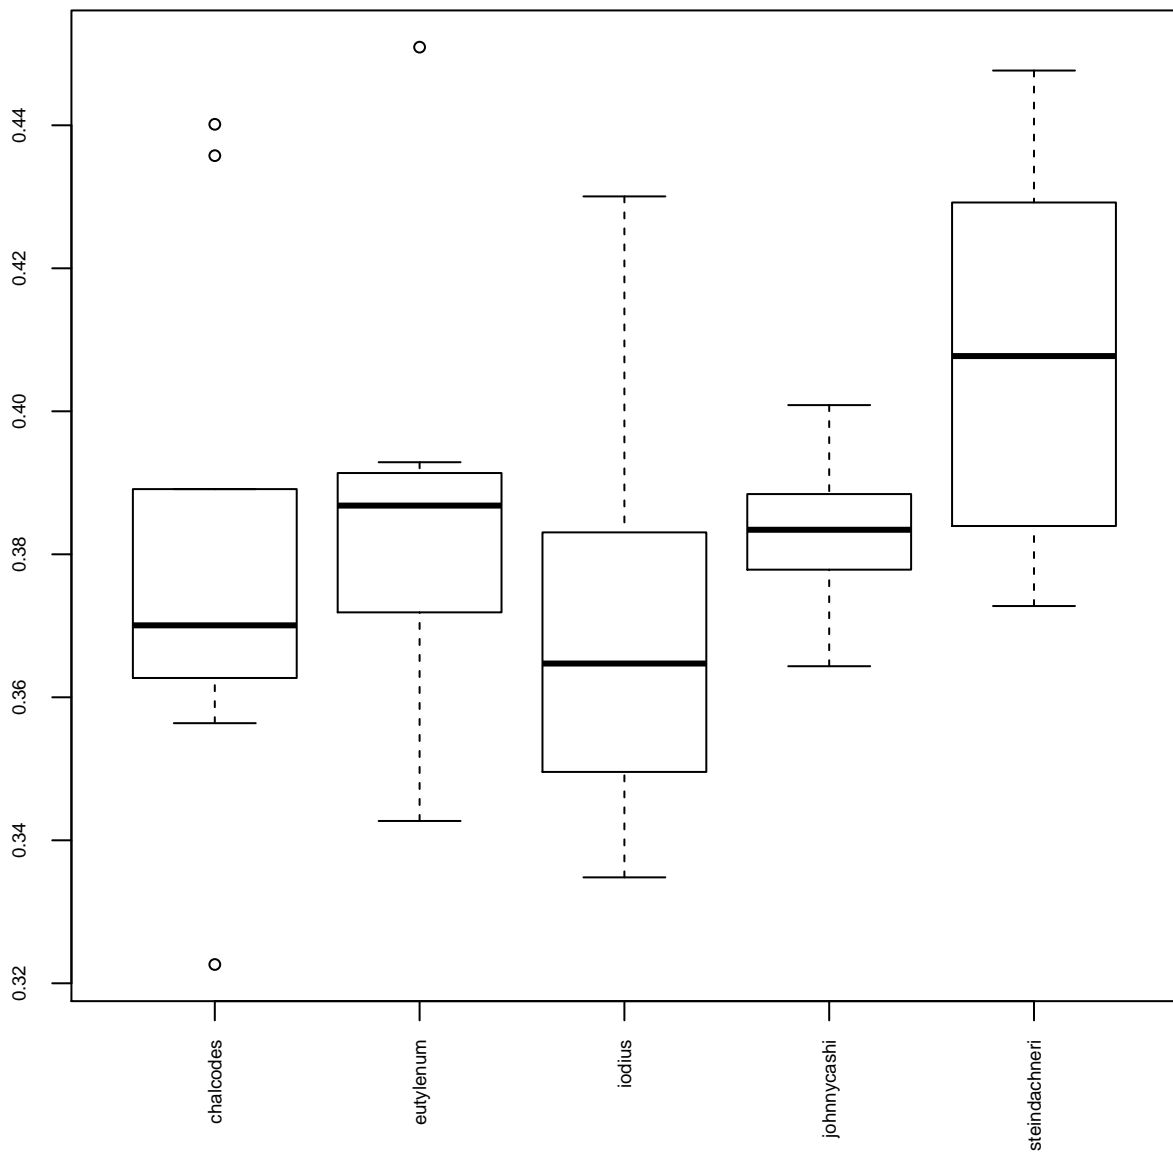

Supplement: Supplementary file 462

## Leg 1/Leg 4 Length ratio – females

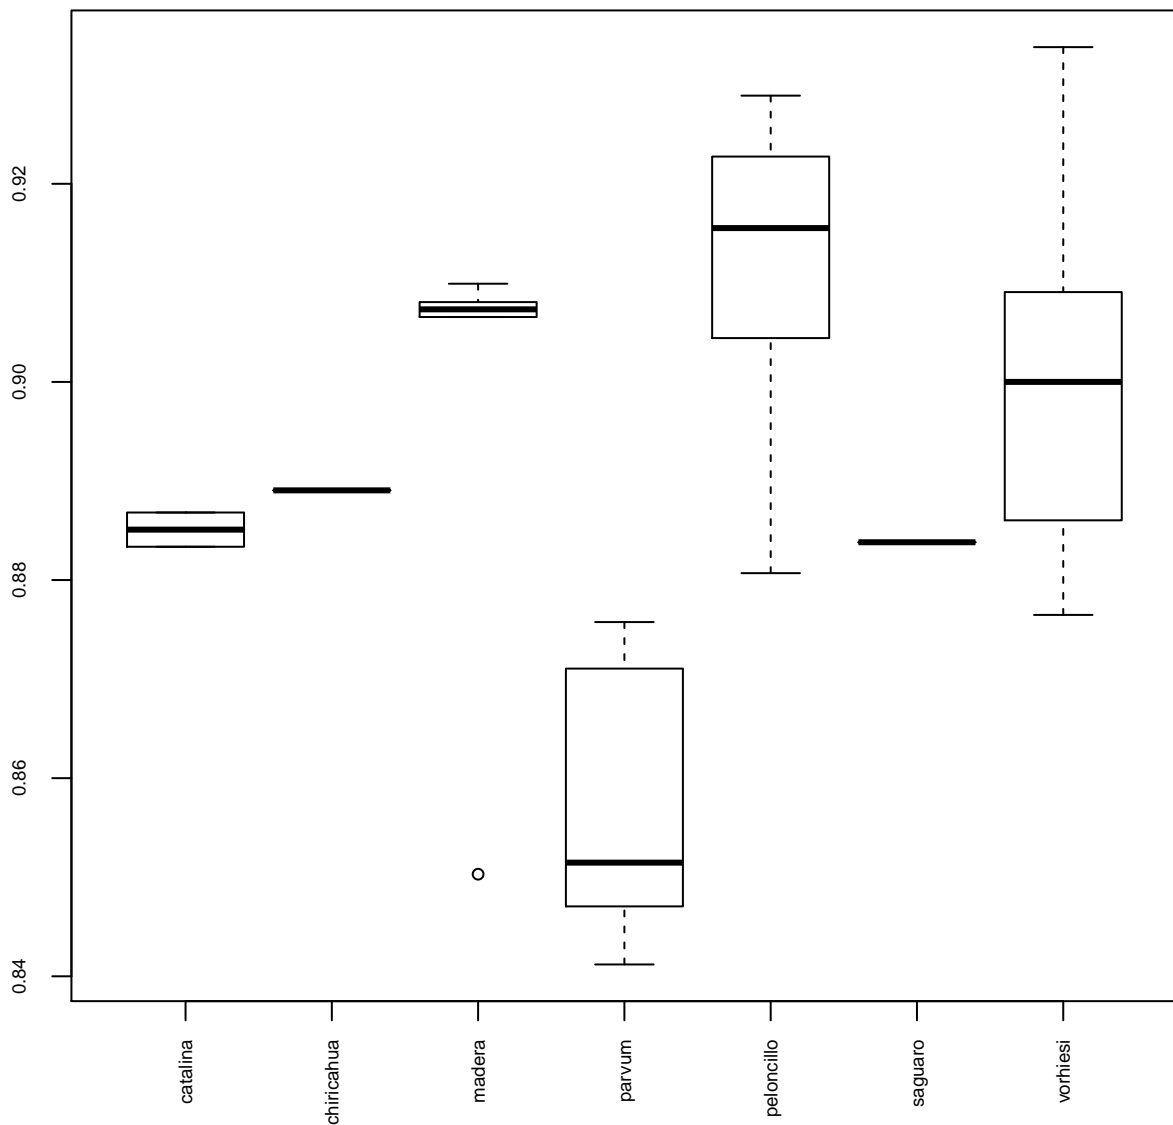

Supplement: Supplementary file 463

## Femur 1/Patella 4 ratio – females

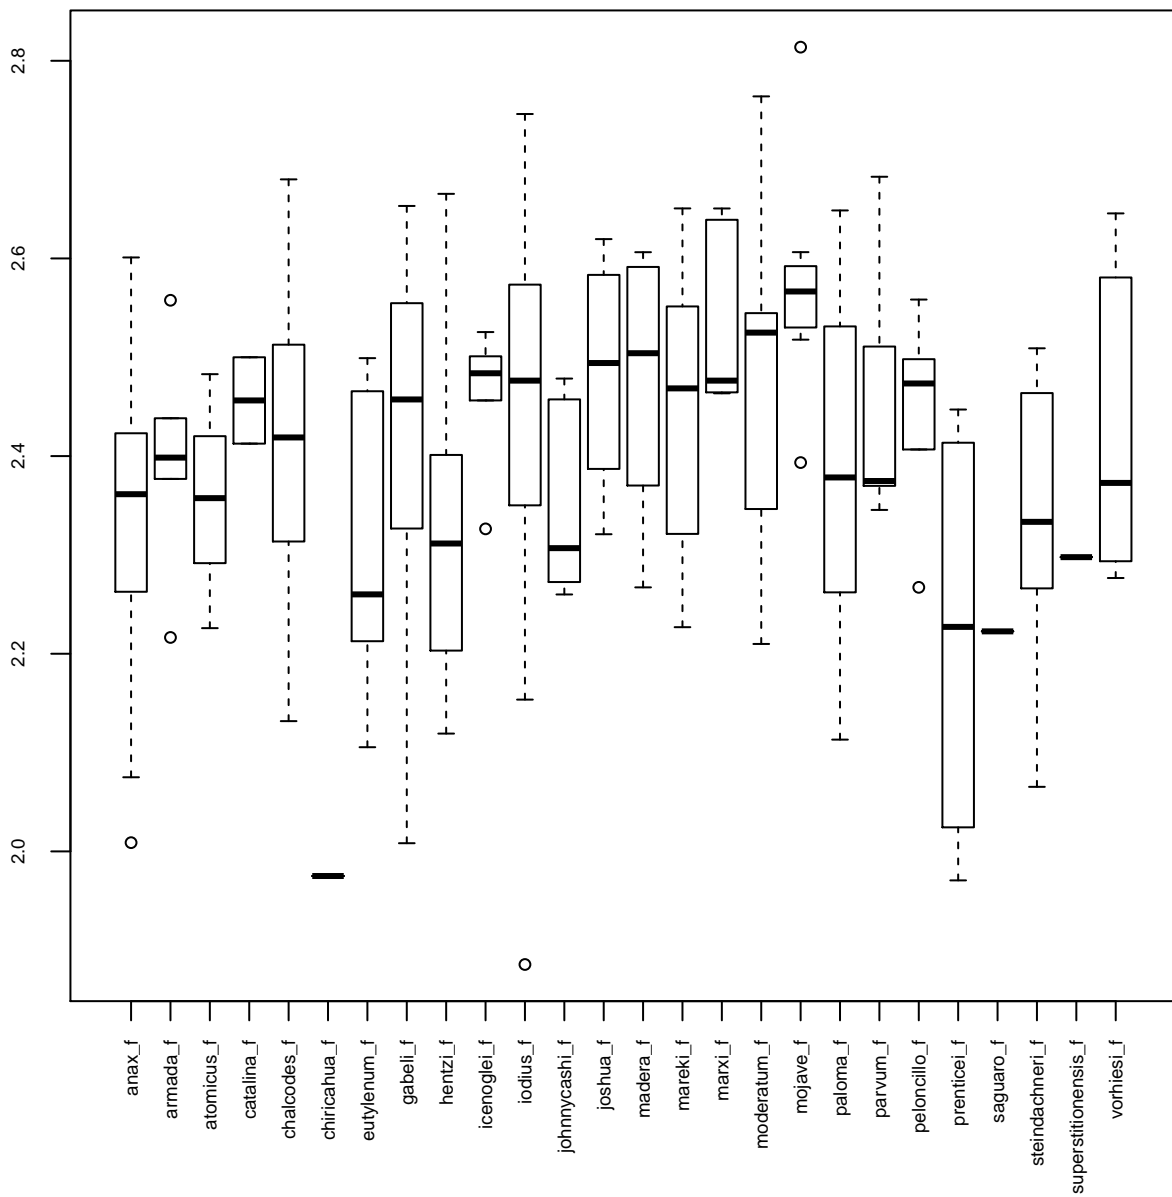

Supplement: Supplementary file 464

## Palpal Tibia/Tarsus 1 Length ratio – males

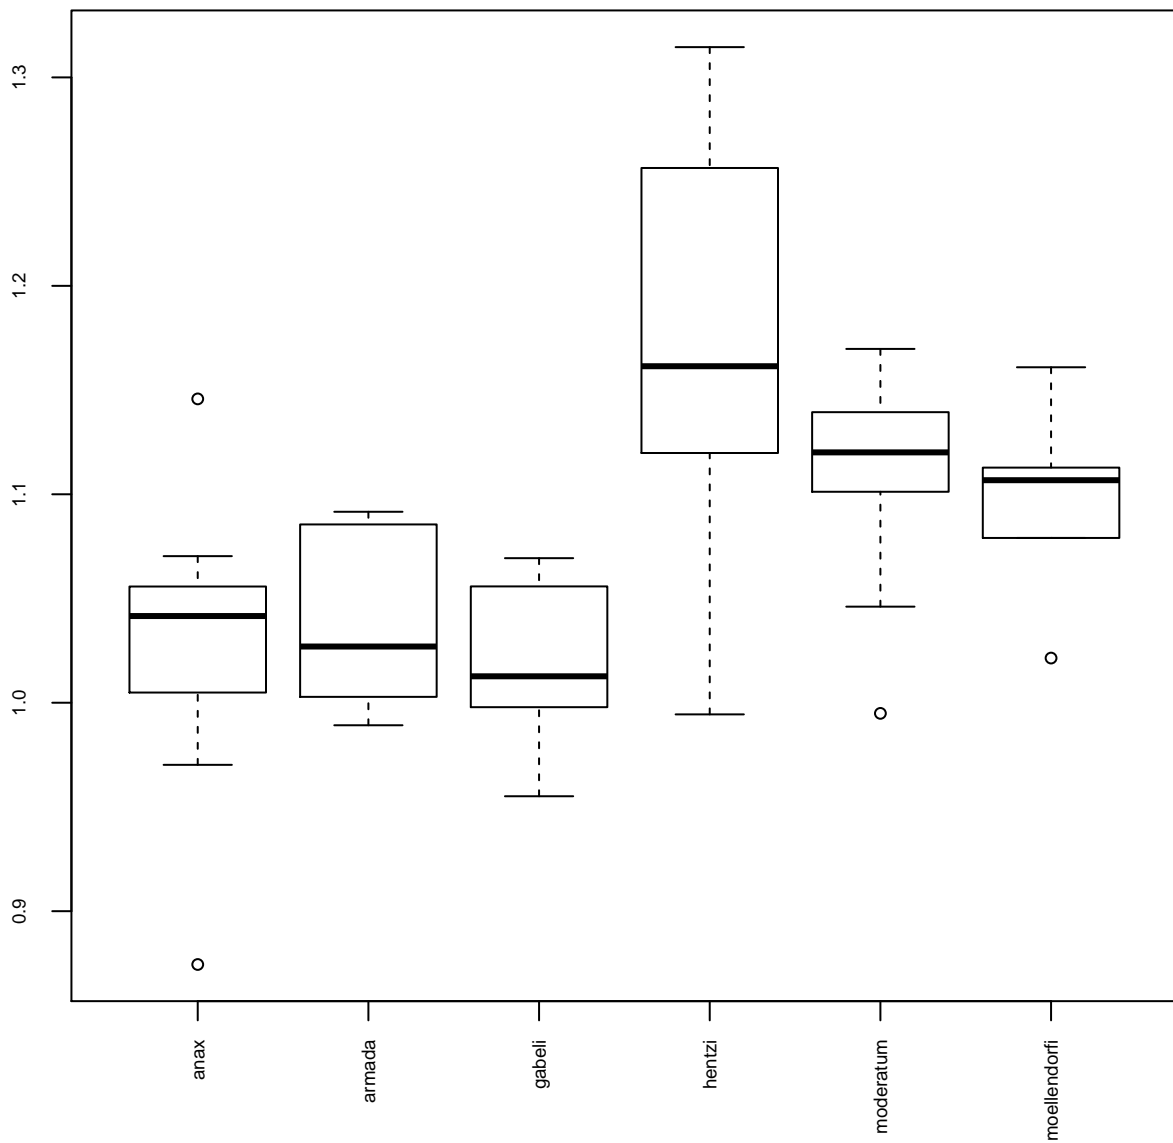

Supplement: Supplementary file 465

# Metatarsus 1/Metatarsus 3 ratio – females

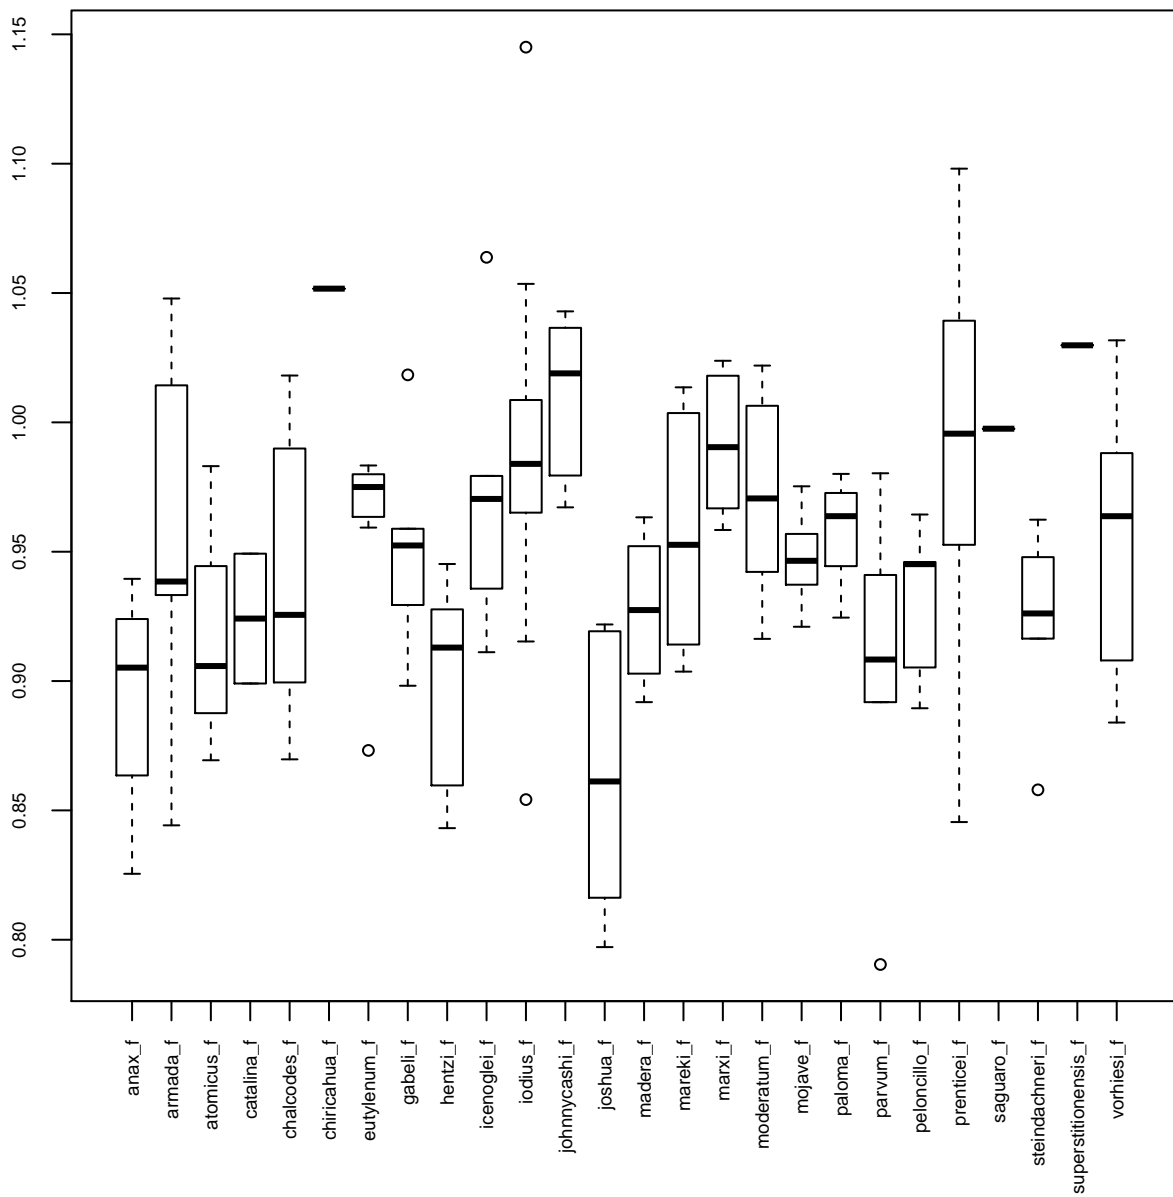

Supplement: Supplementary file 466

## Metatarsus 3/Tibia 4 Length ratio – males

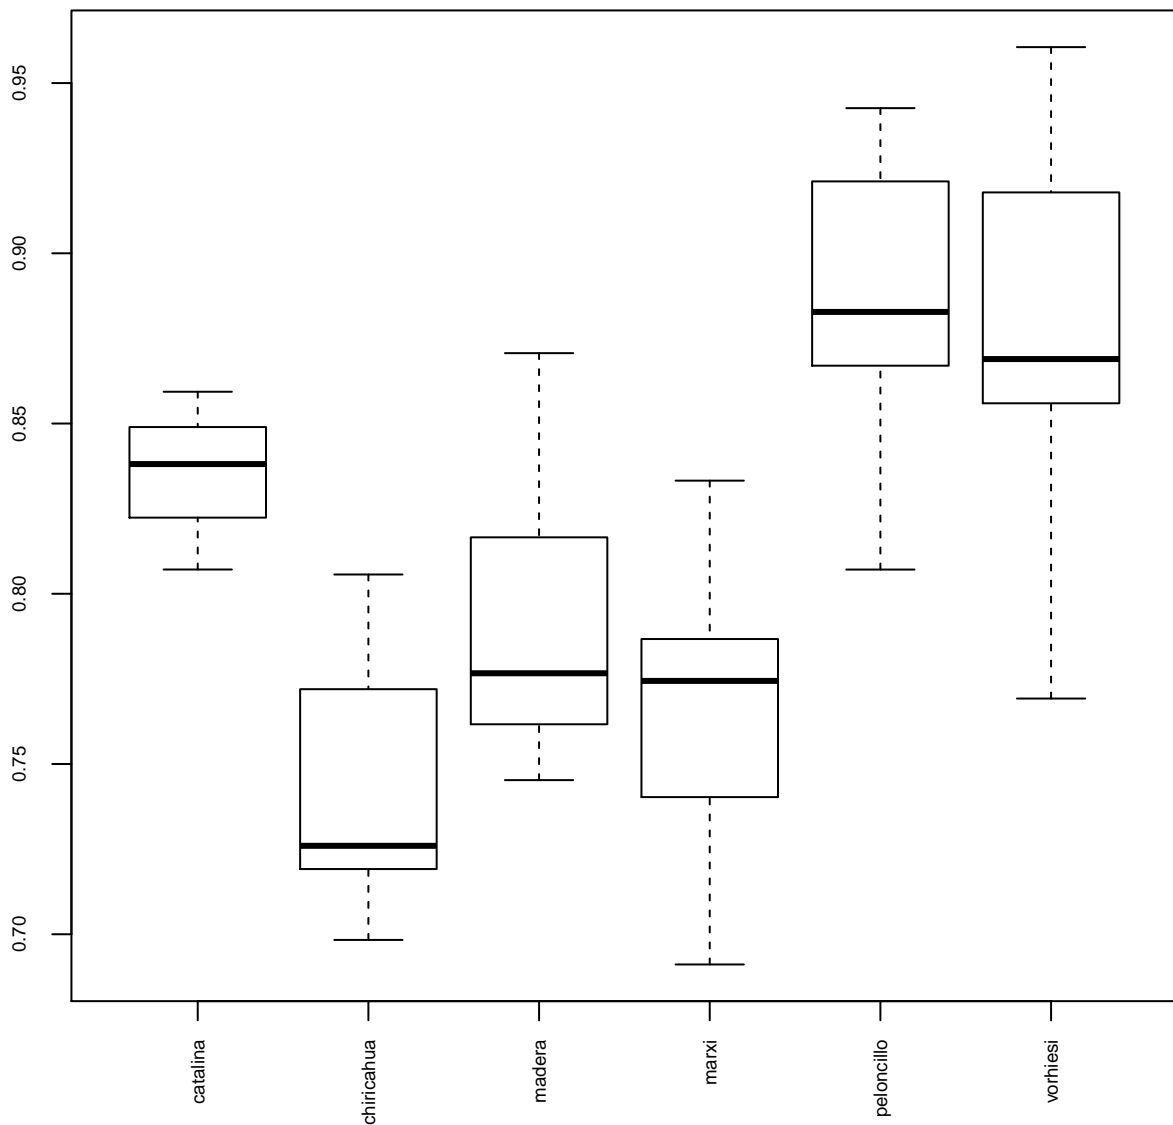

Supplement: Supplementary file 467

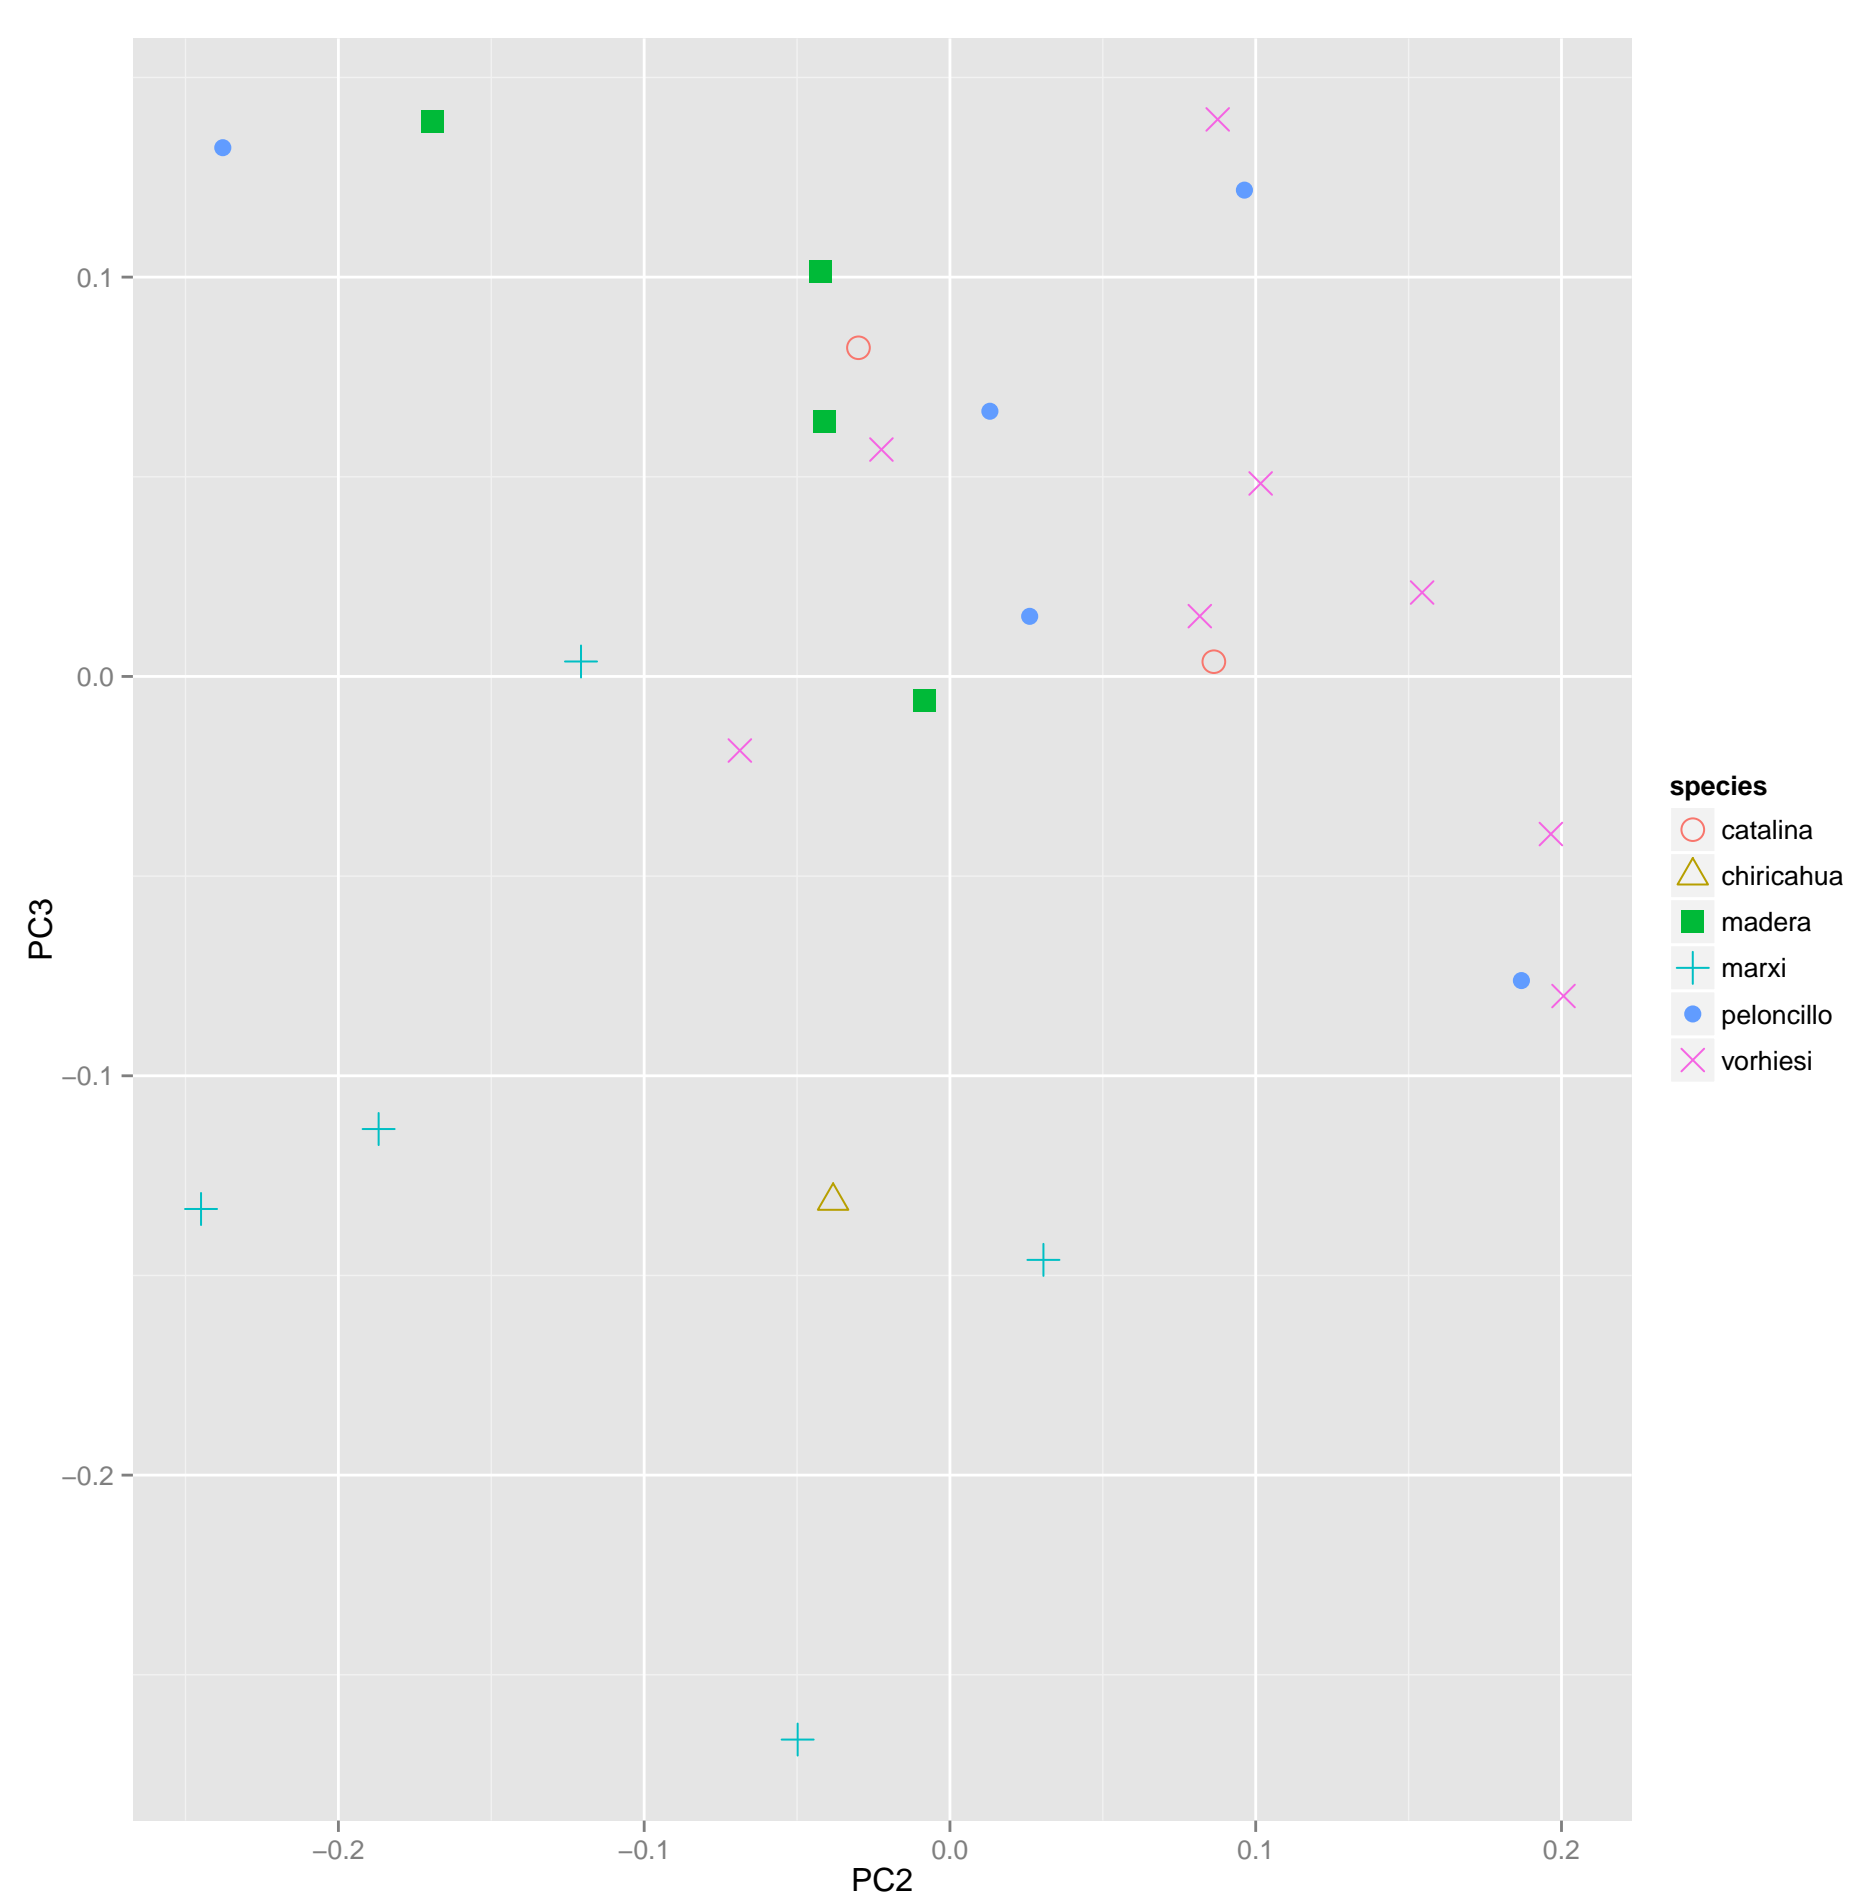

Supplement: Supplementary file 468

# Metatarsus 3/Femur 4 Length ratio – males

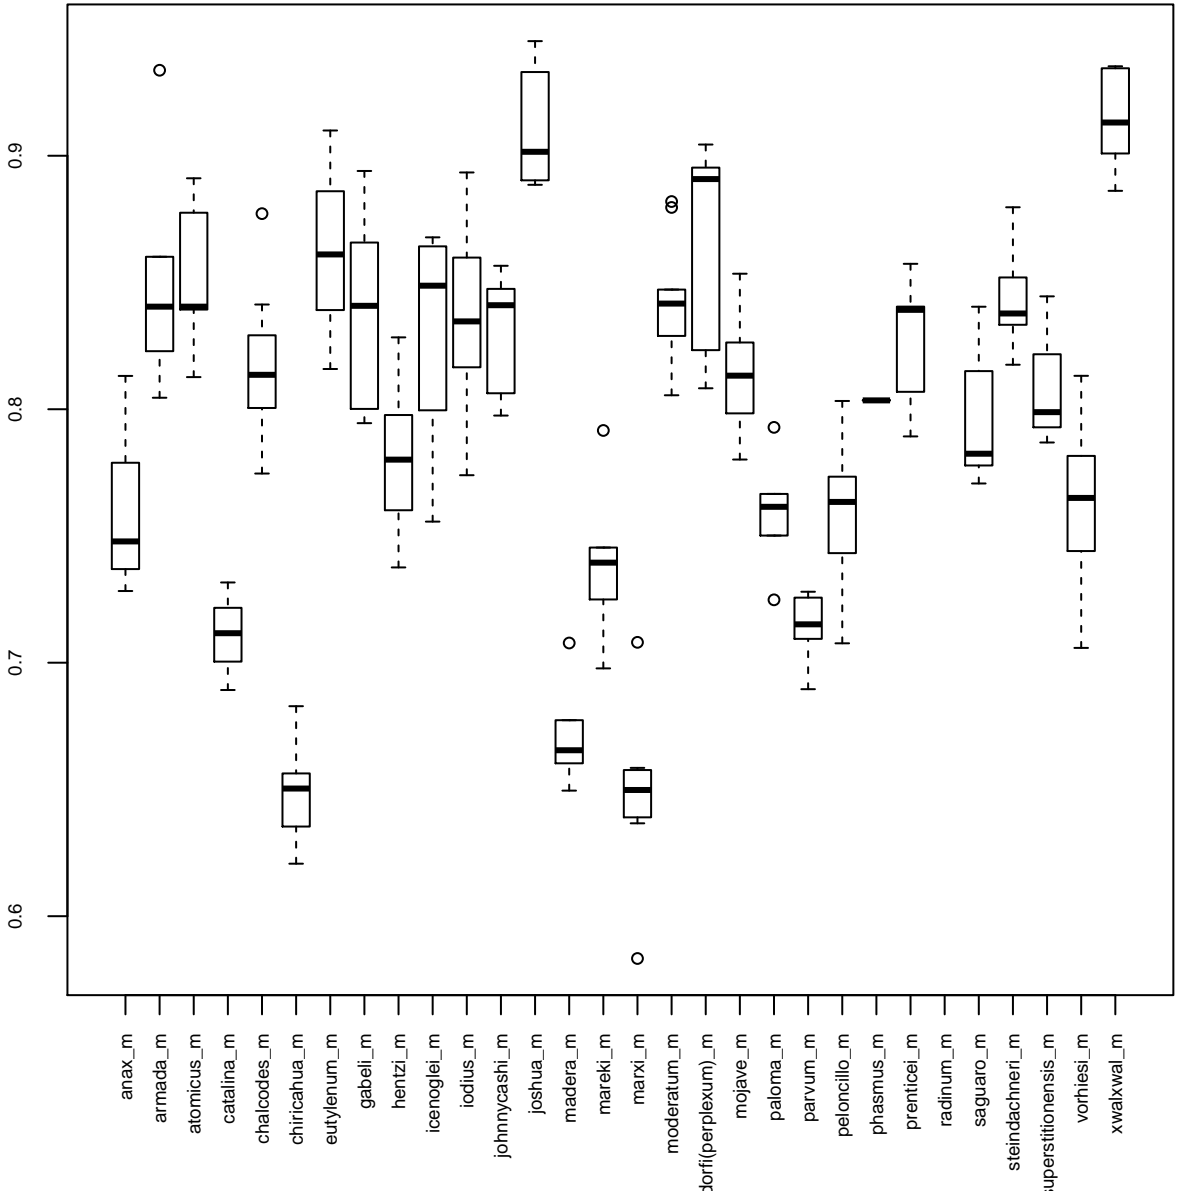

Supplement: Supplementary file 469

## Leg 4 Length – males

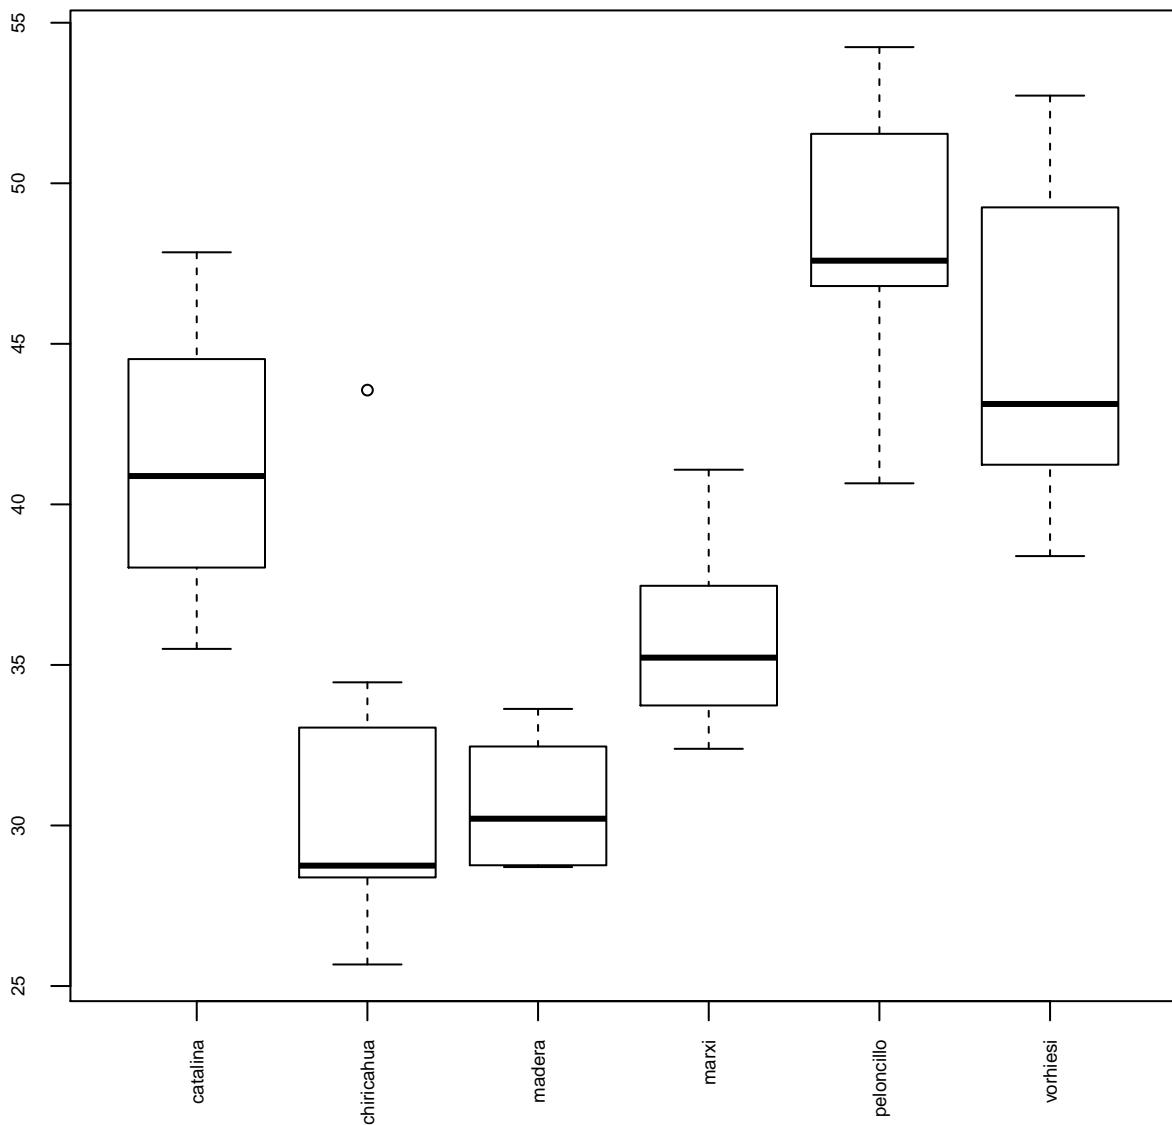

Supplement: Supplementary file 470

## Tarsus 1/Metatarsus 4 Length ratio – females

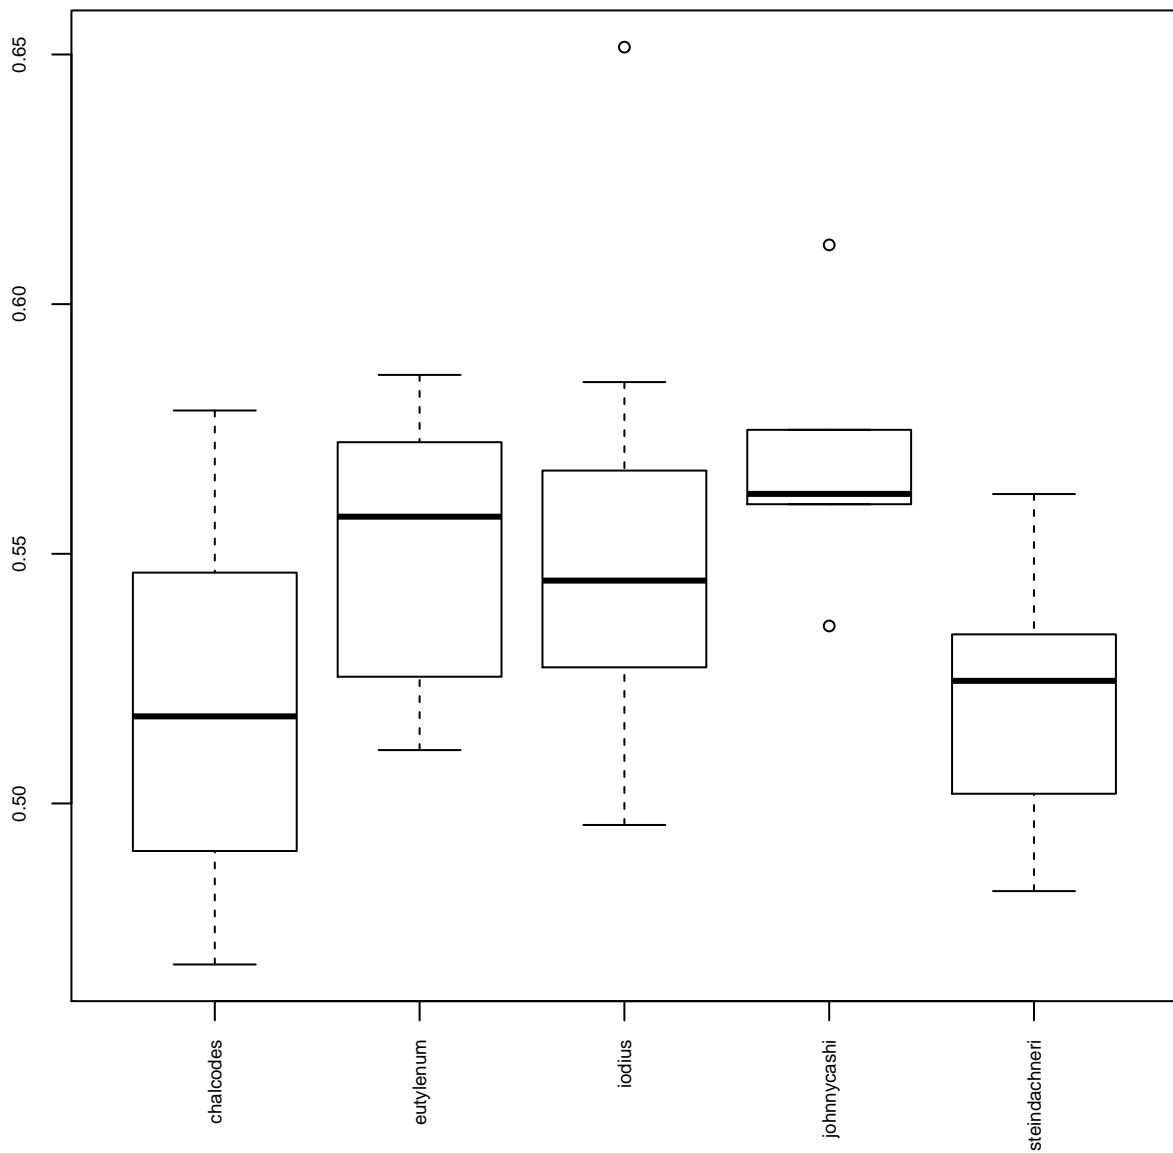

Supplement: Supplementary file 471

# Palpal Tibia/Tibia 4 Length ratio – males

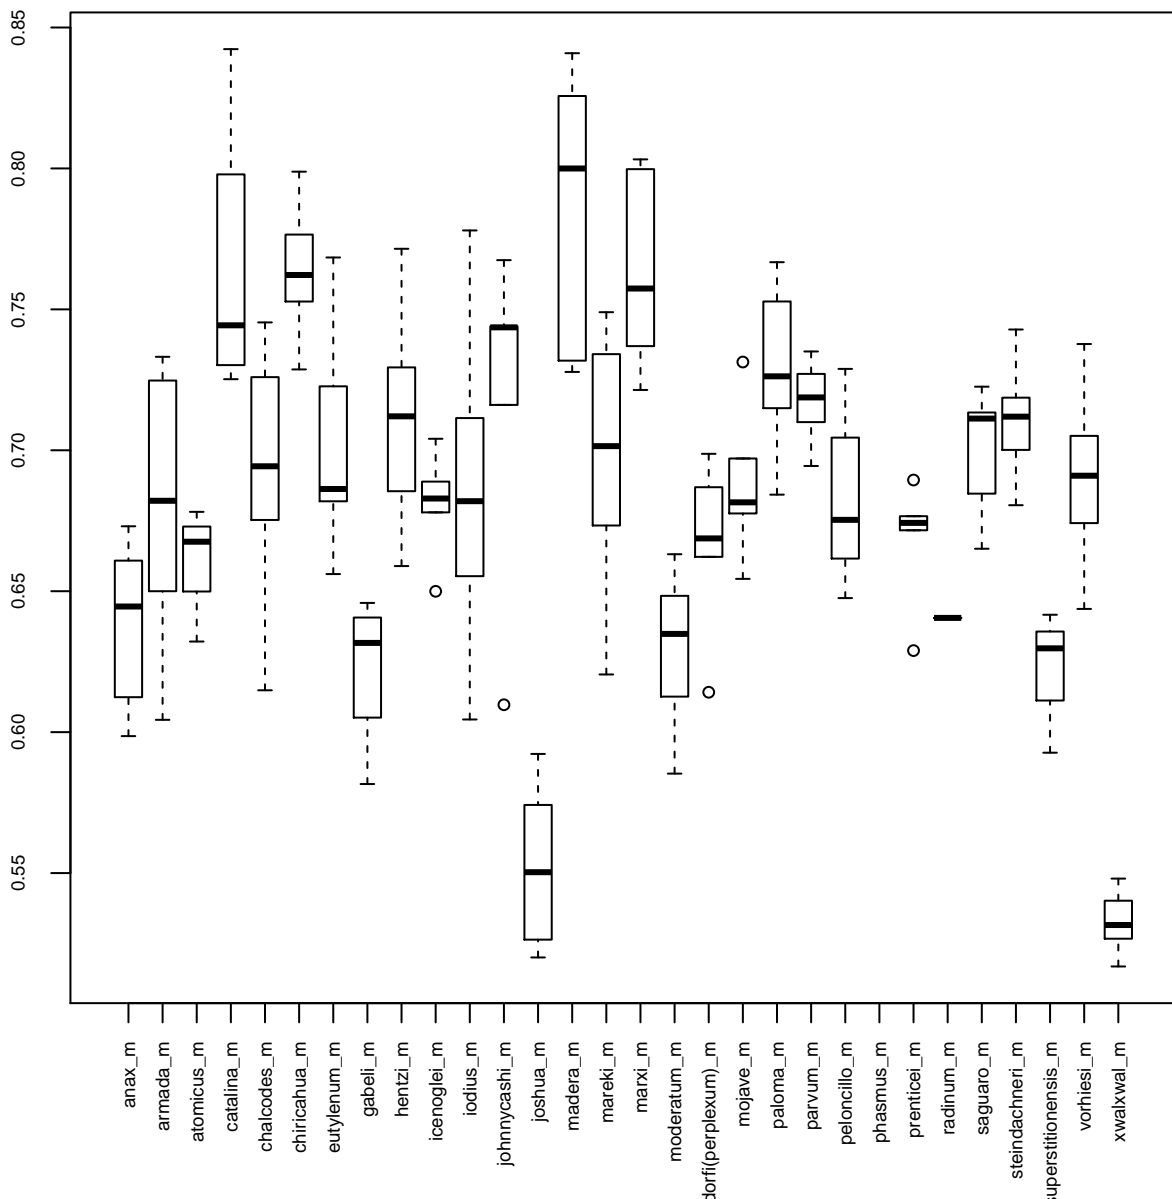

Supplement: Supplementary file 472

# Metatarsus 1/Tarsus 4 Length ratio – males

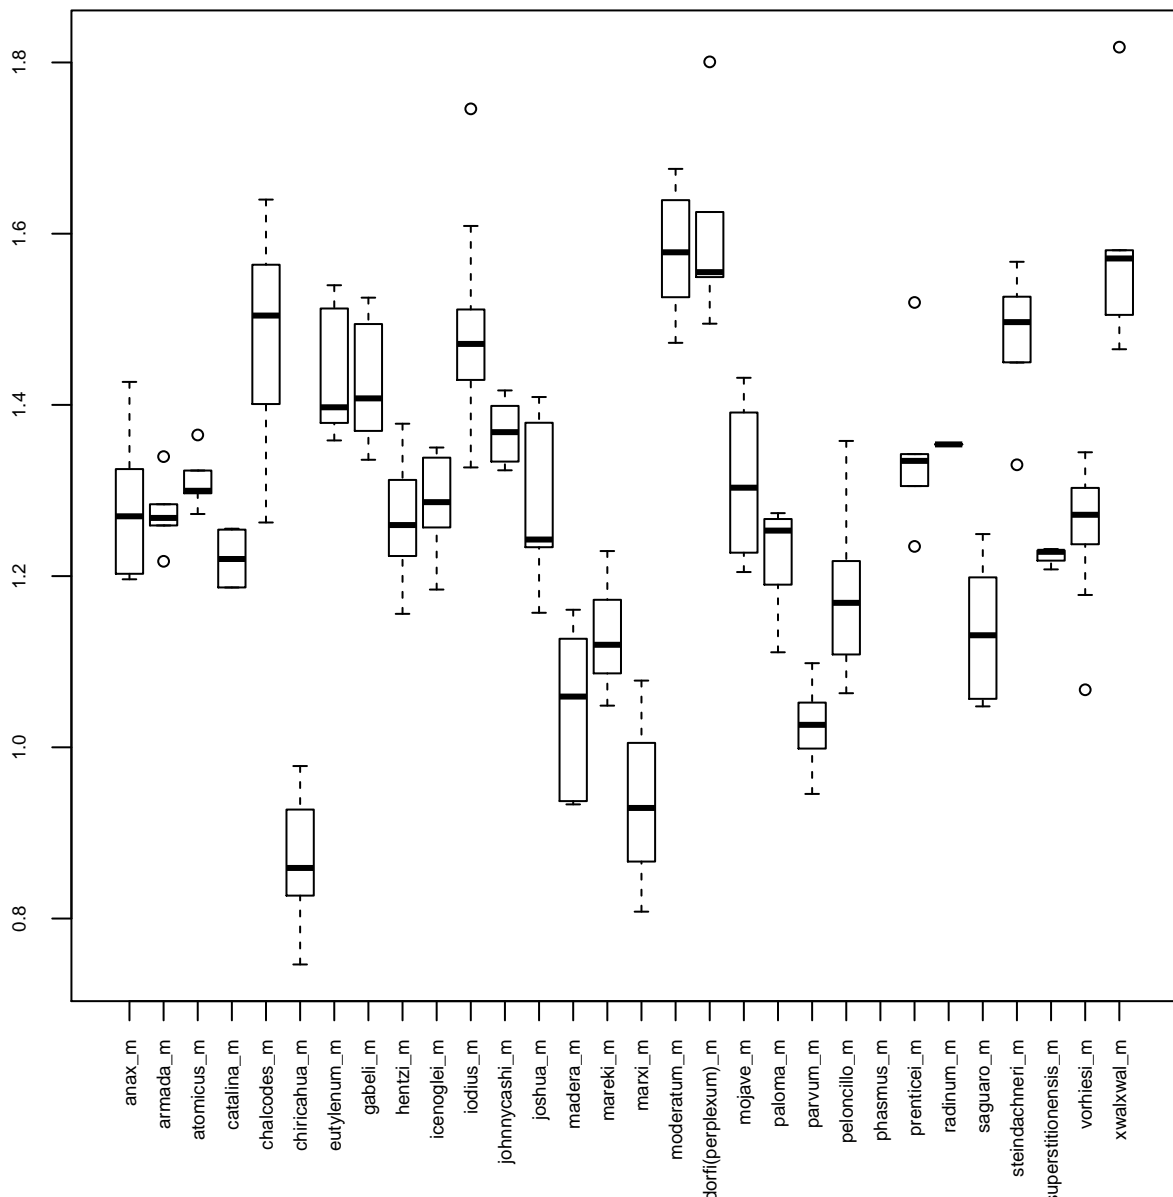

Supplement: Supplementary file 473

# Carapace Length/Patella 3 ratio – males

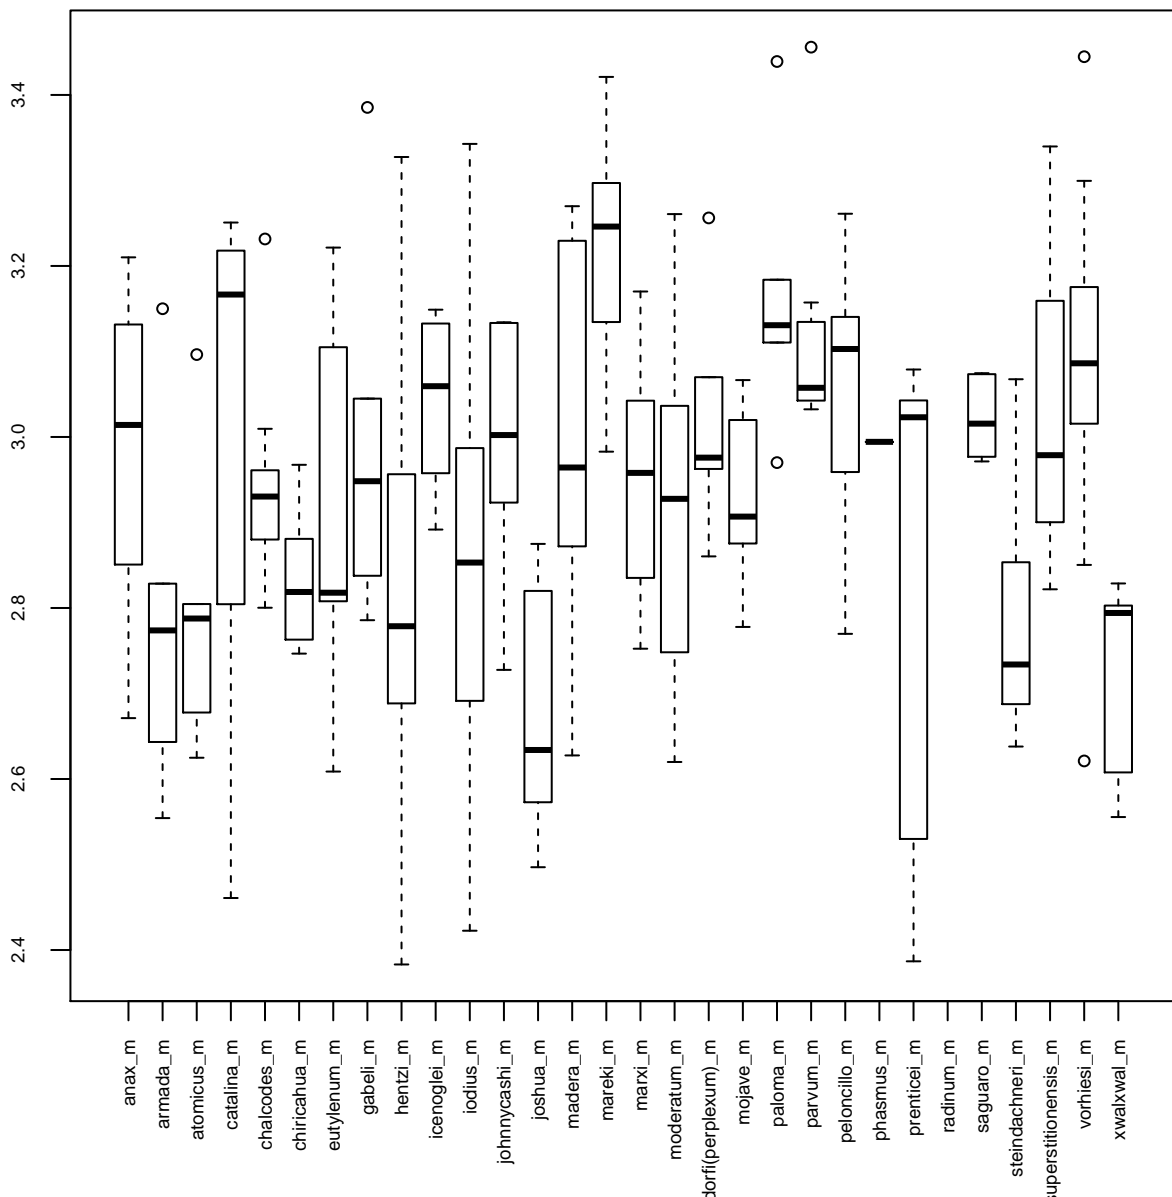

Supplement: Supplementary file 474

## Leg 1/Leg 4 Length ratio – females

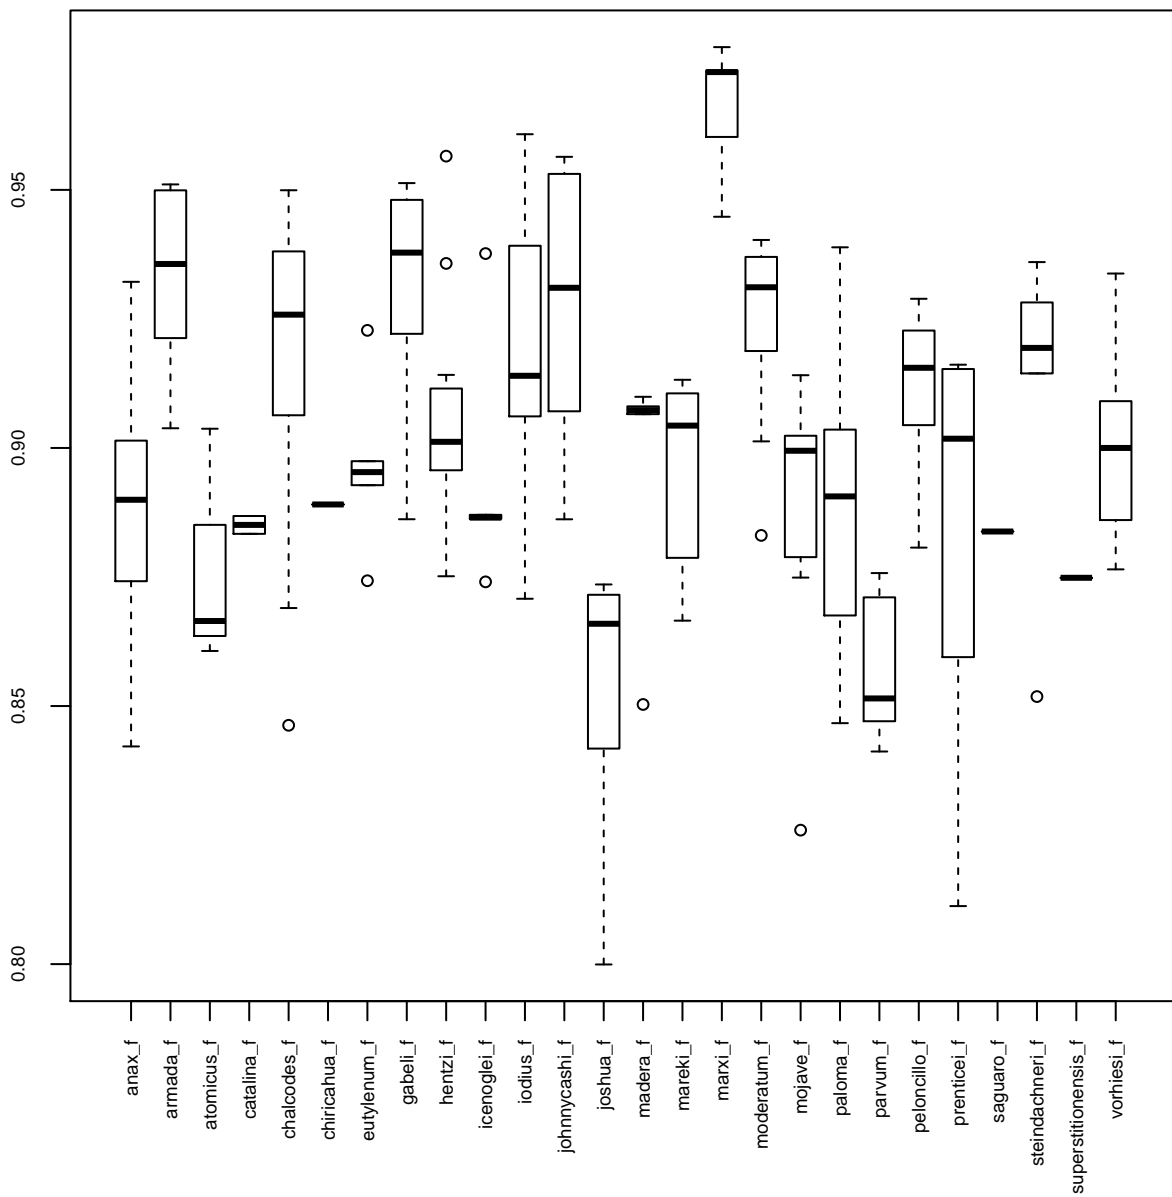

Supplement: Supplementary file 475

# Patella 1/Tibia 3 Length ratio – males

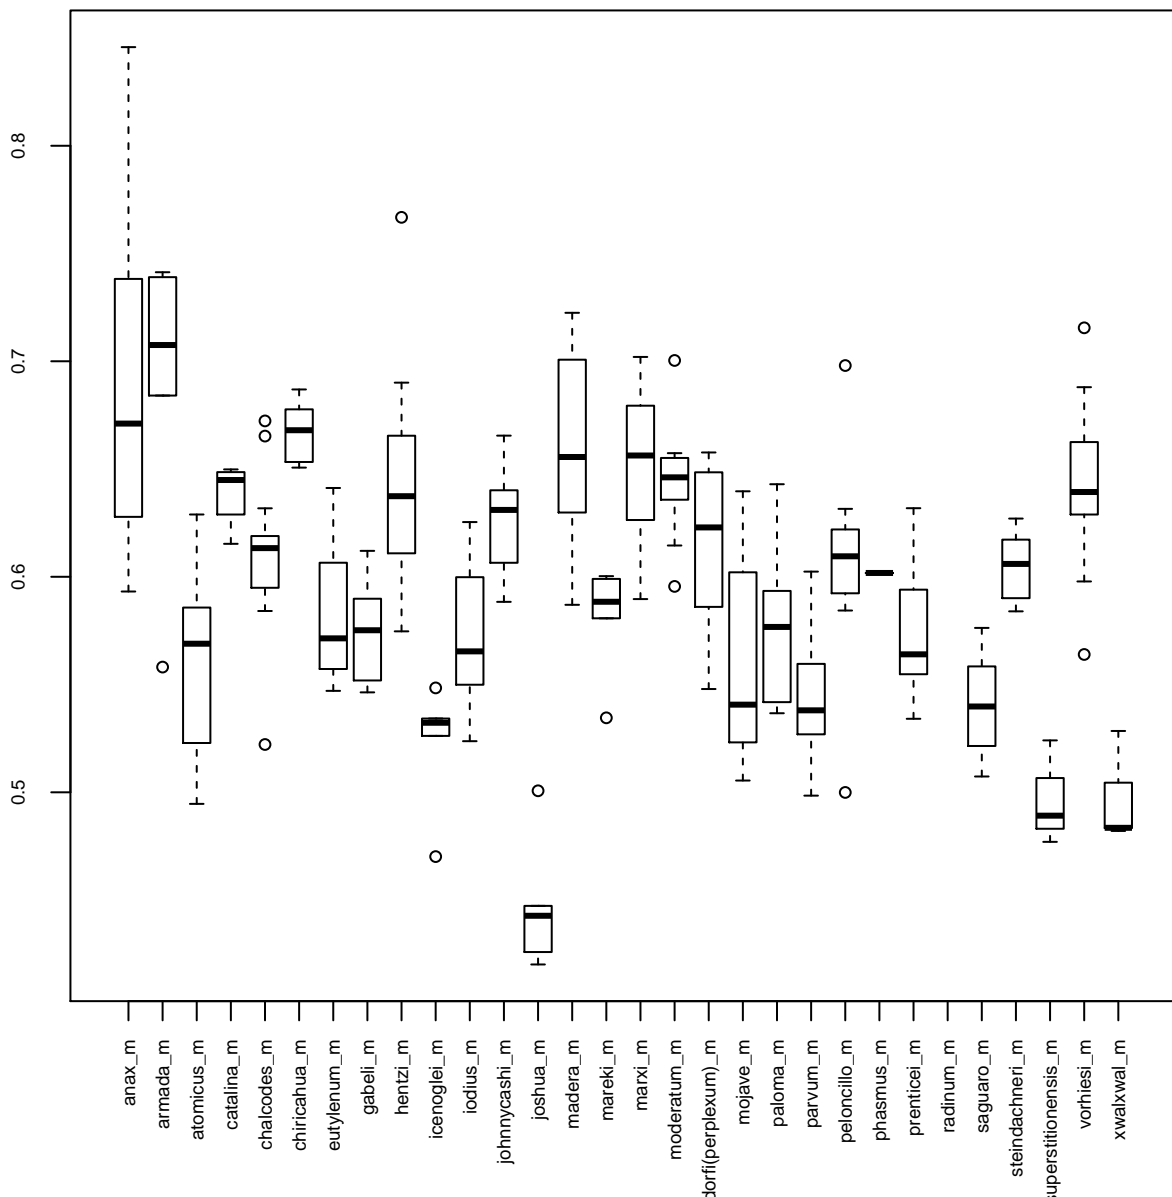

Supplement: Supplementary file 476

## Leg 3 Length/Carapace Length ratio – females

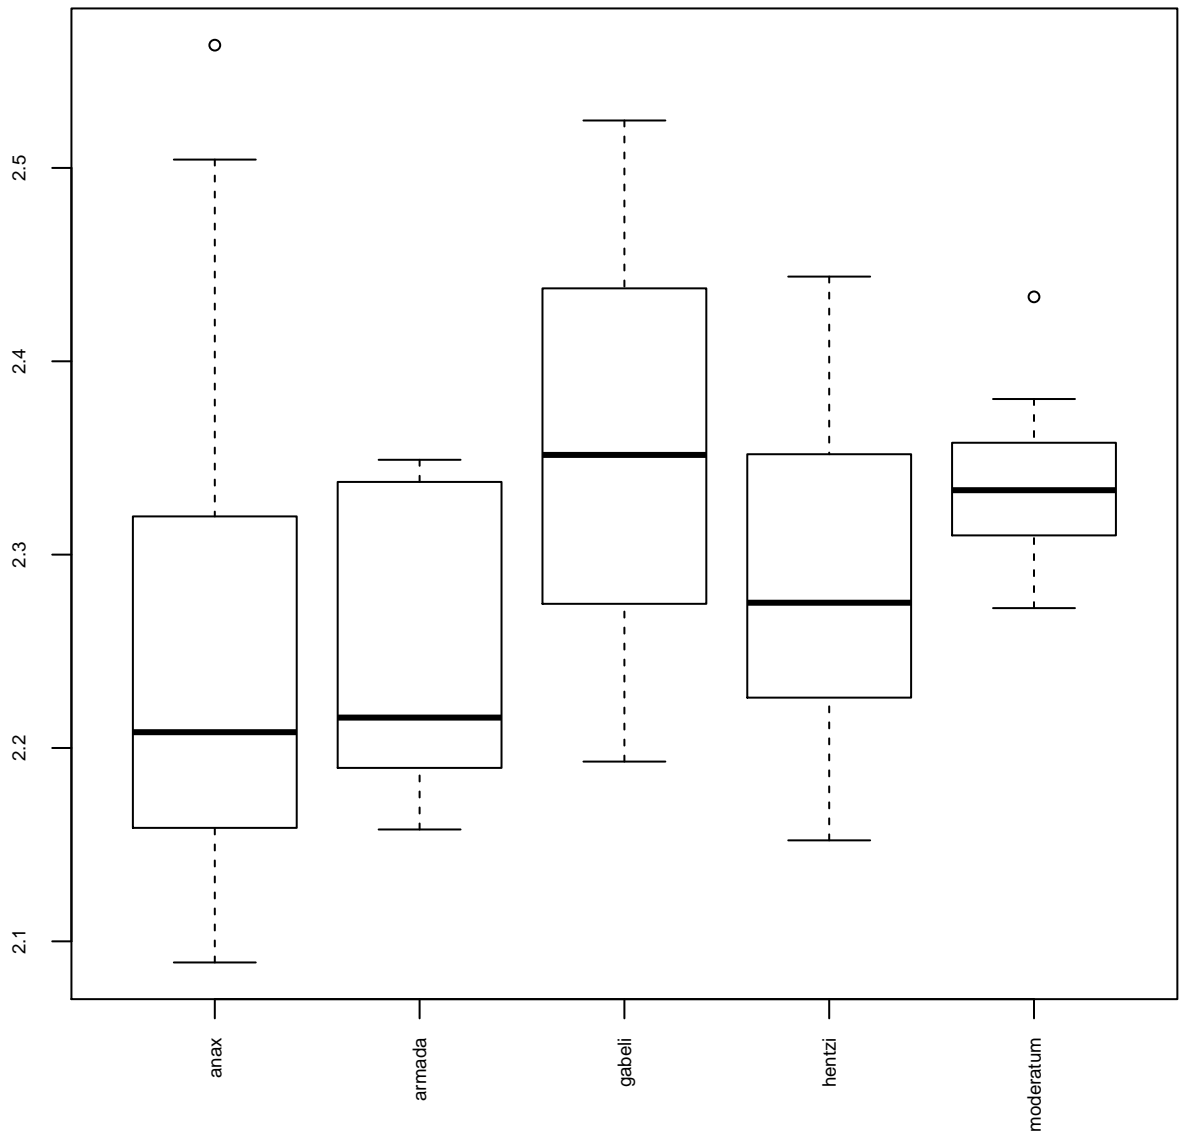

Supplement: Supplementary file 477

## Femur 4/Tibia 4 ratio – females

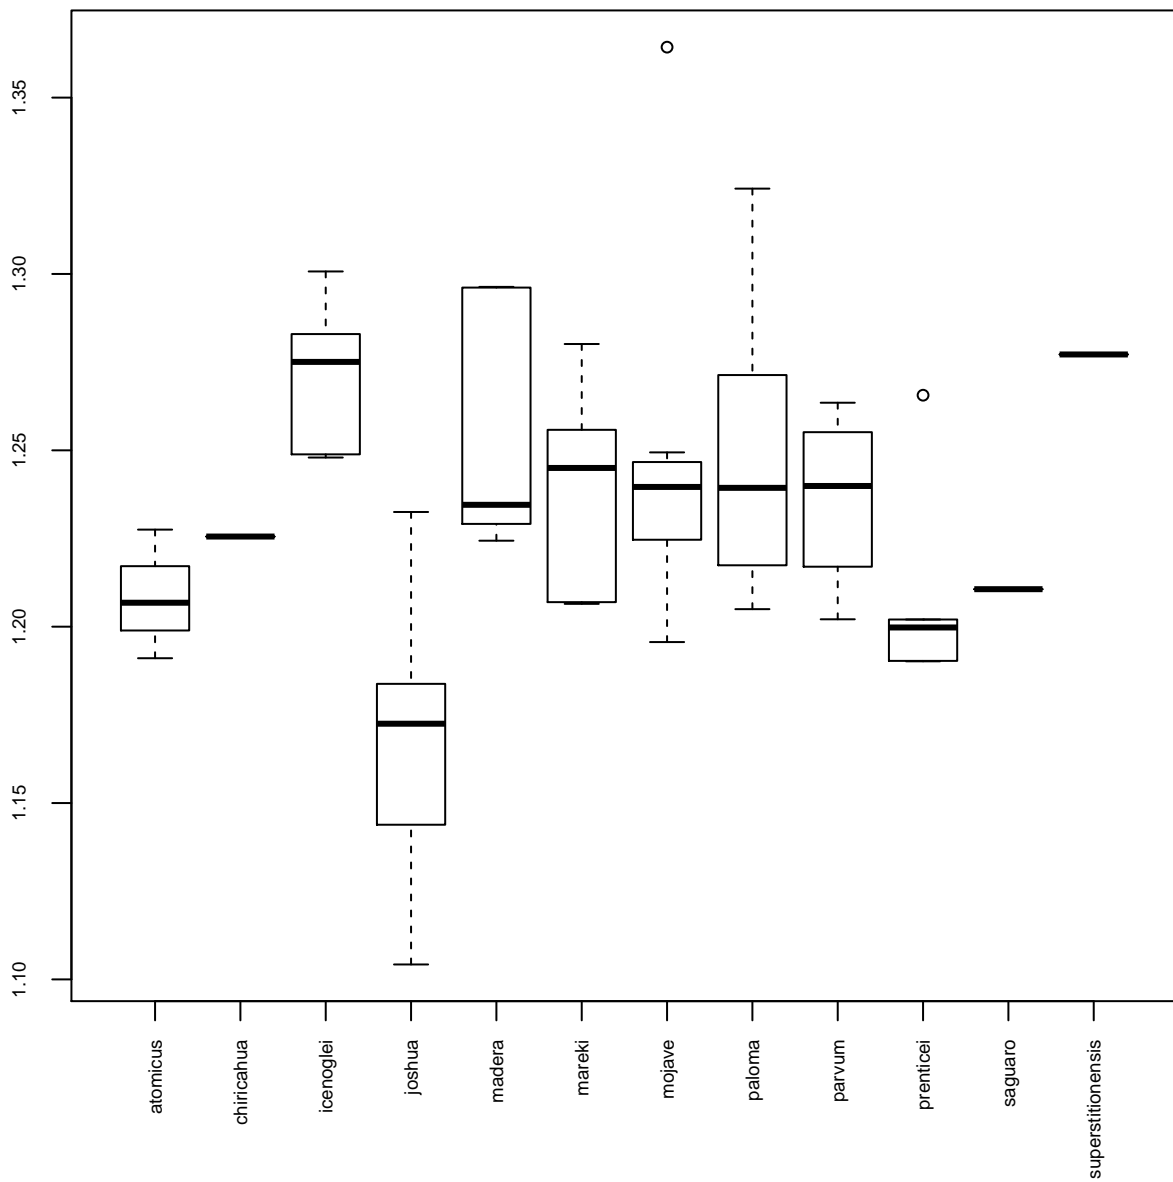

Supplement: Supplementary file 478

## Femur 1/Metatarsus 4 ratio – females

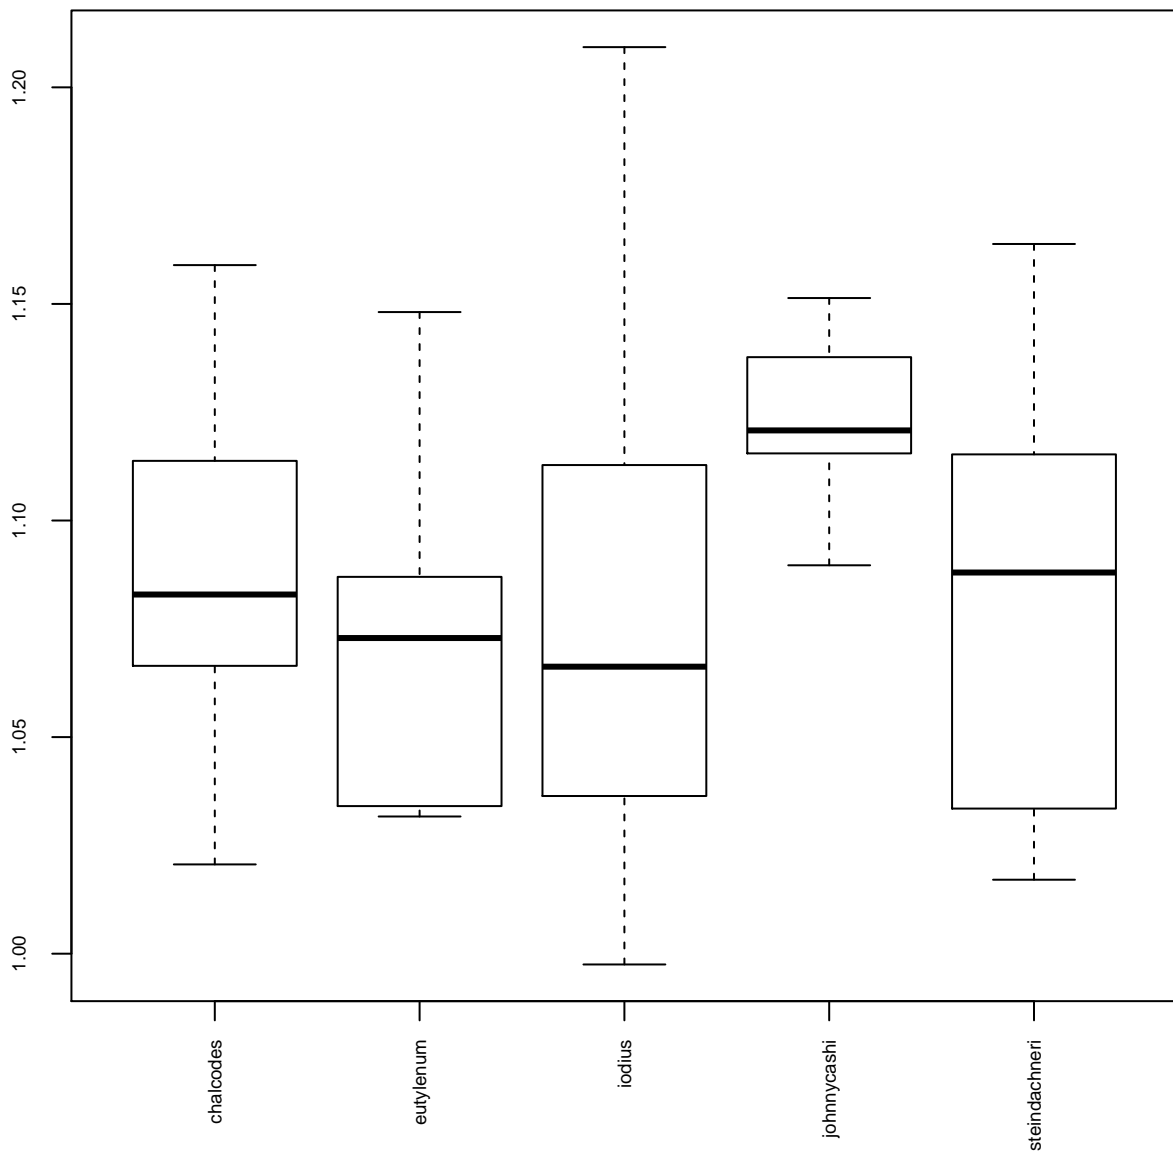

Supplement: Supplementary file 479

## Tibia 1/Tarsus 4 Length ratio – females

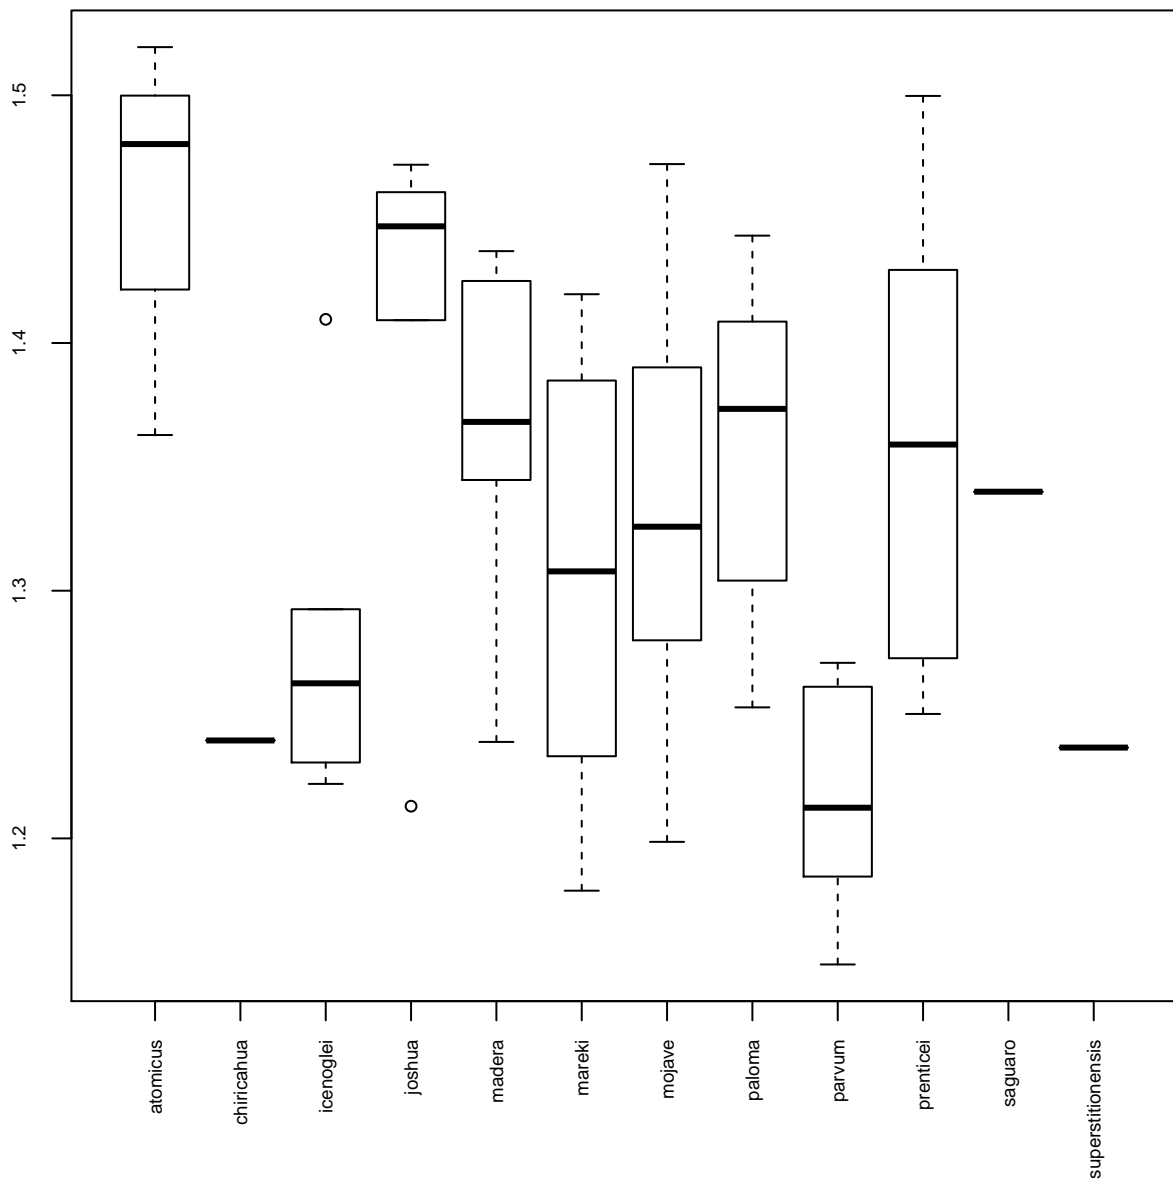

Supplement: Supplementary file 480

## Leg 1 Length/Carapace Length ratio – males

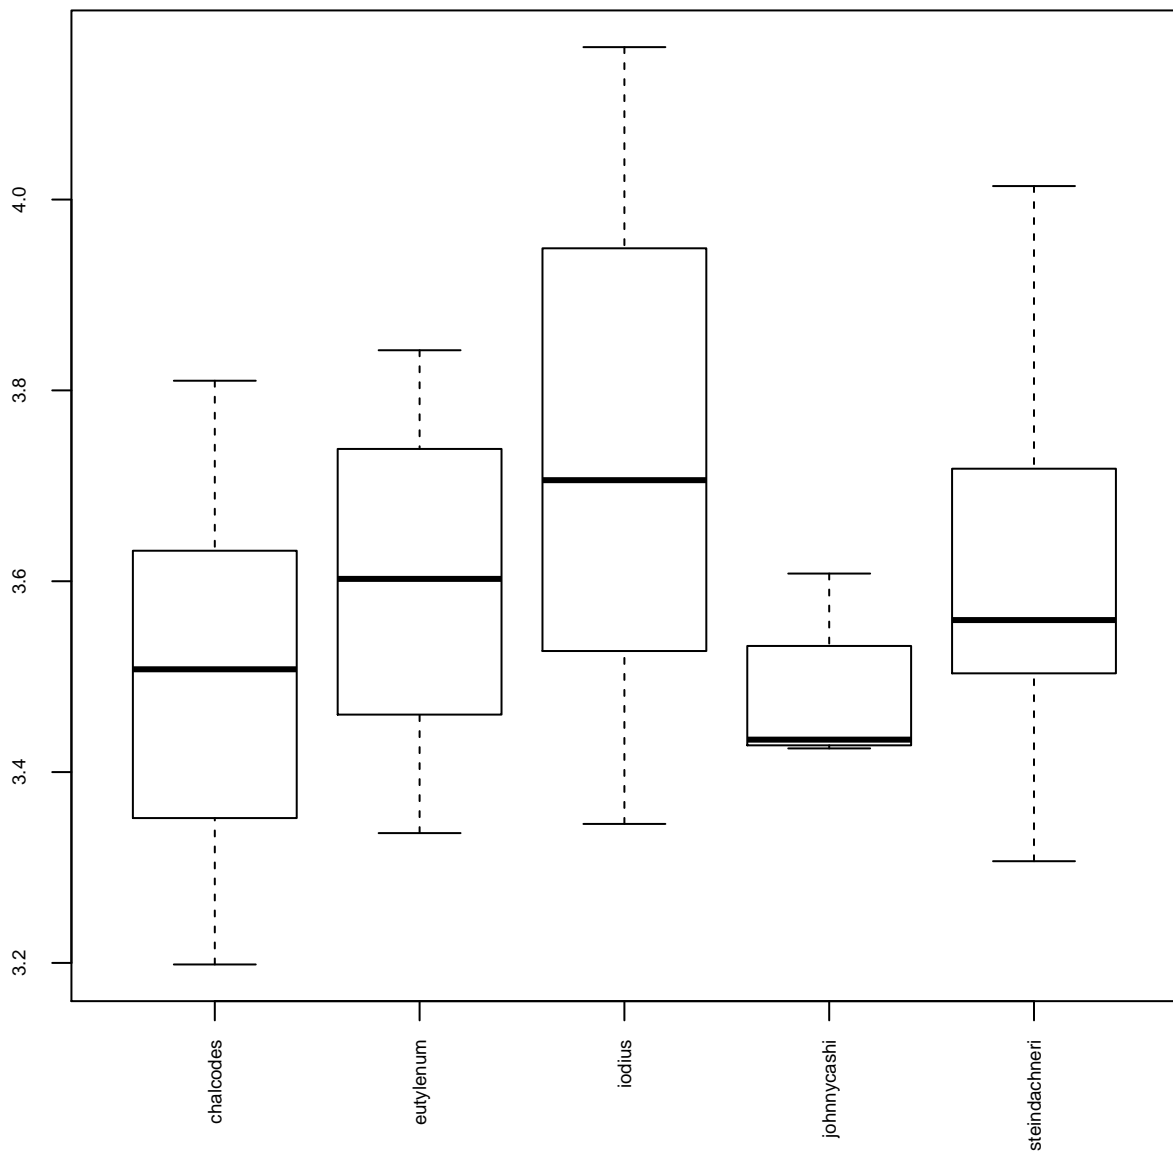

Supplement: Supplementary file 481

## Femur 3/Patella 4 Length ratio – females

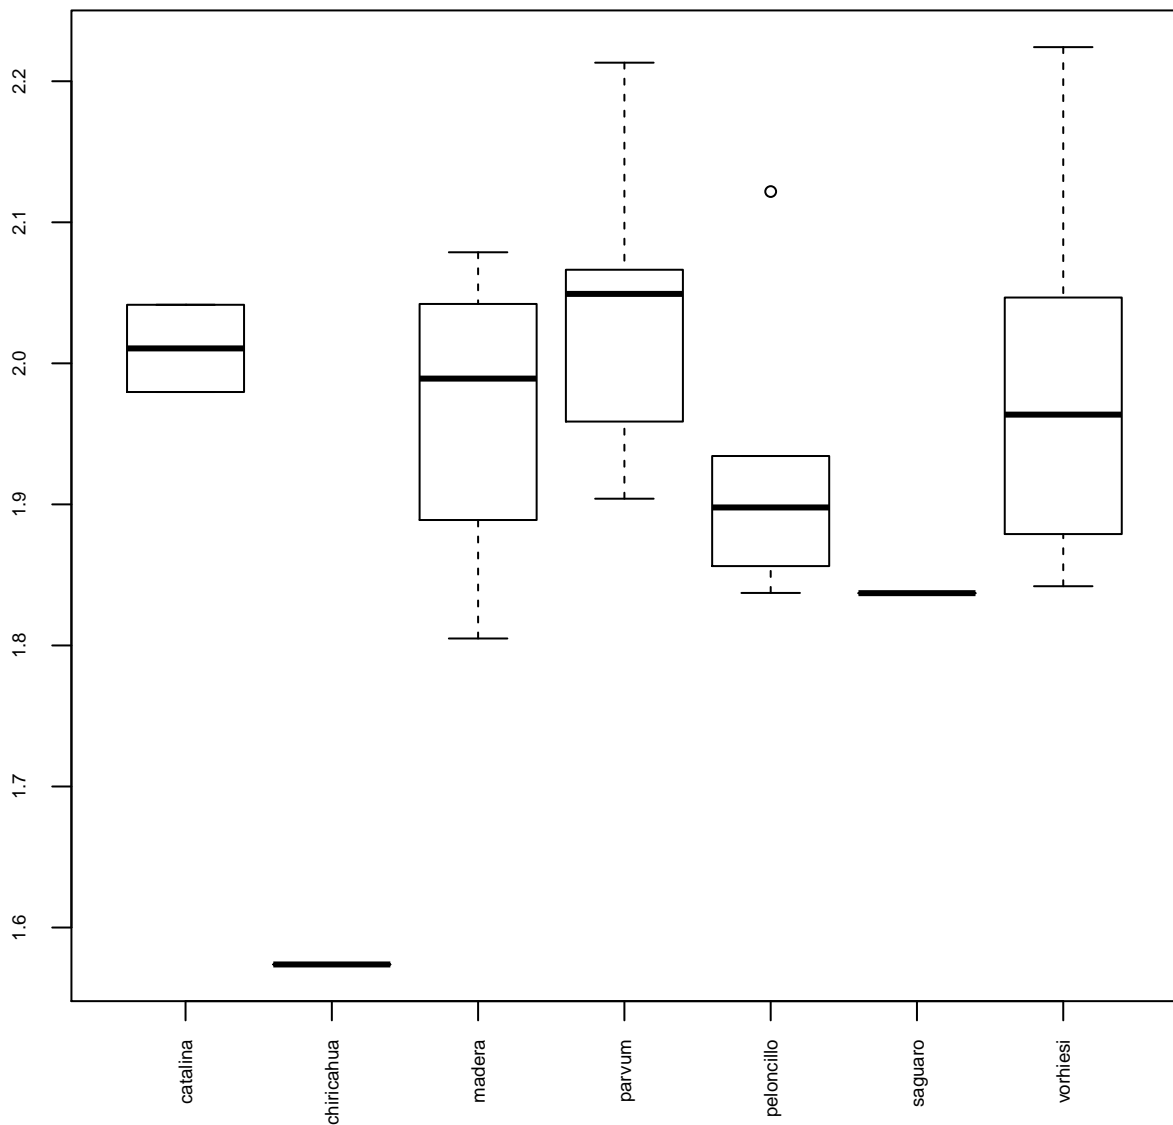

Supplement: Supplementary file 482

# Tibia 1/Tarsus 3 Length ratio – females

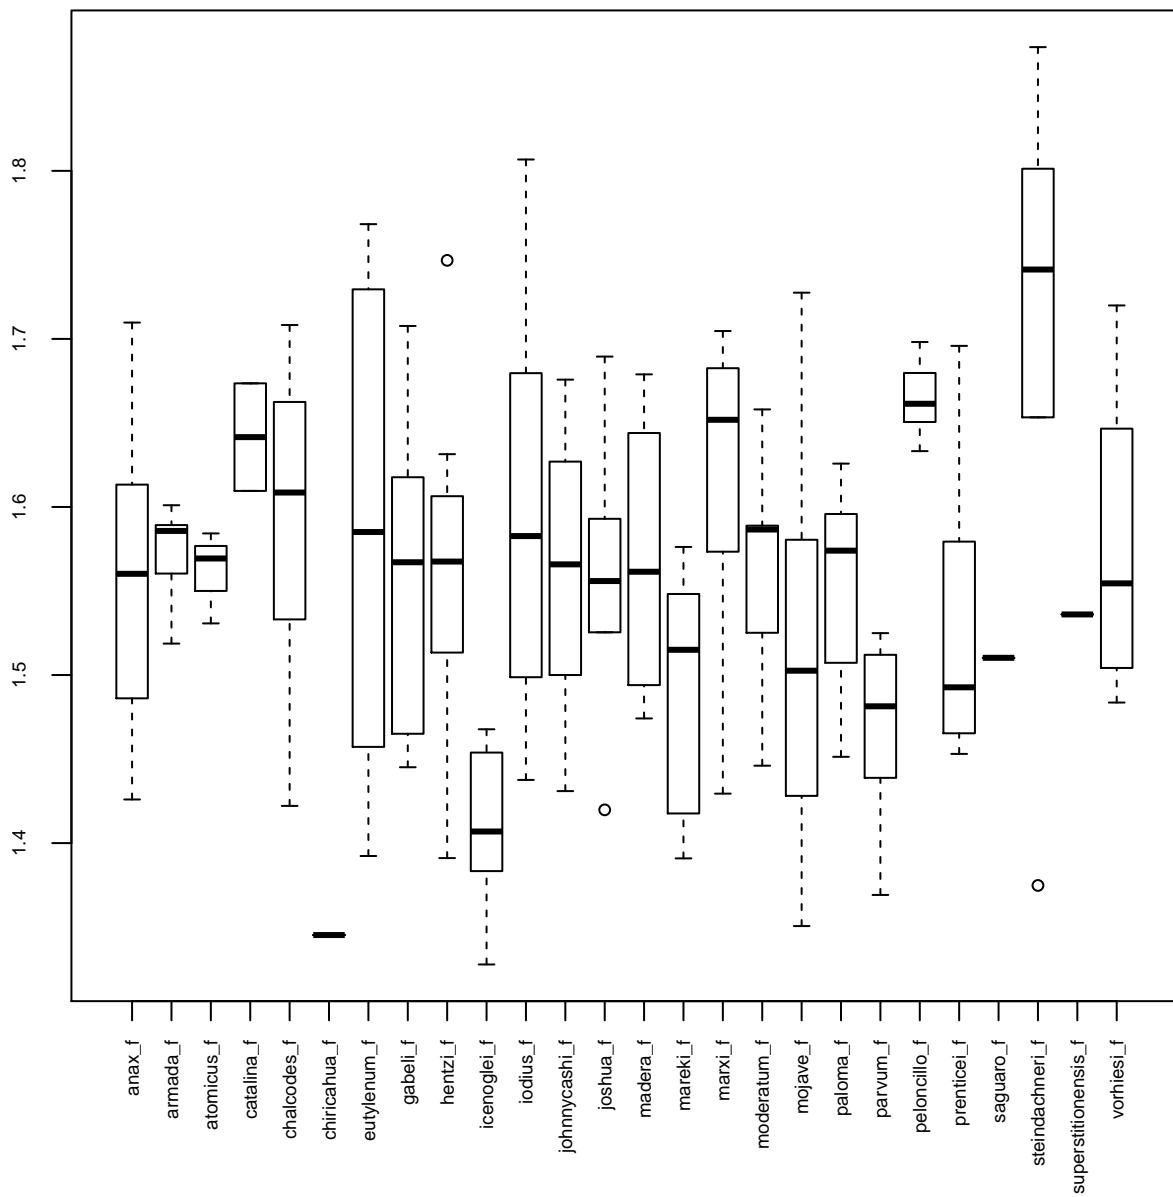

Supplement: Supplementary file 483

## Carapace Length/Patella 3 ratio – females

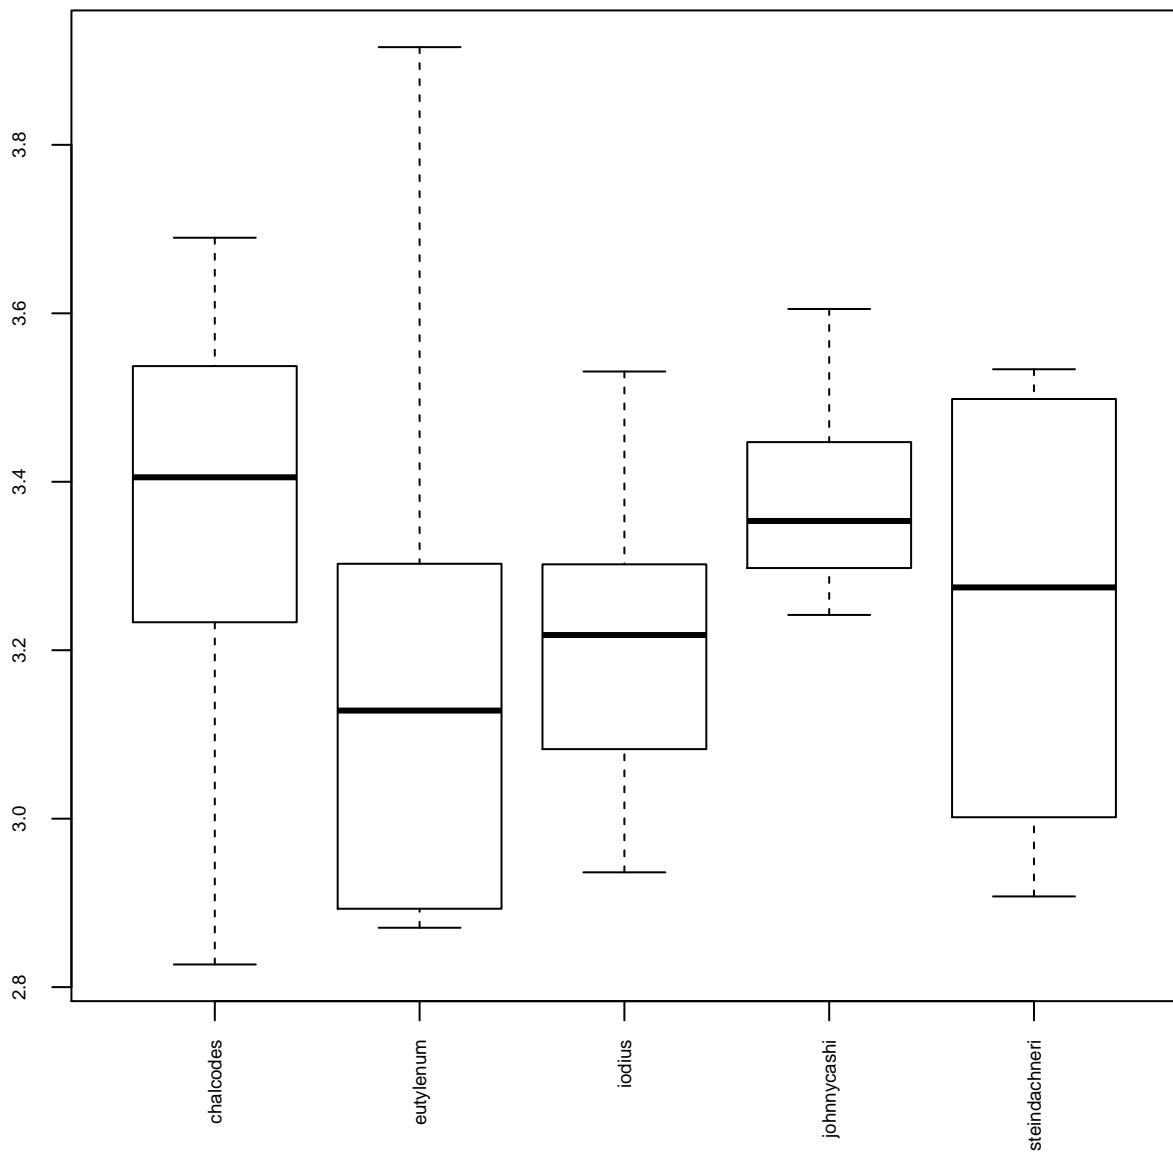

Supplement: Supplementary file 484

# Tibia 1/Patella 3 Length ratio – males

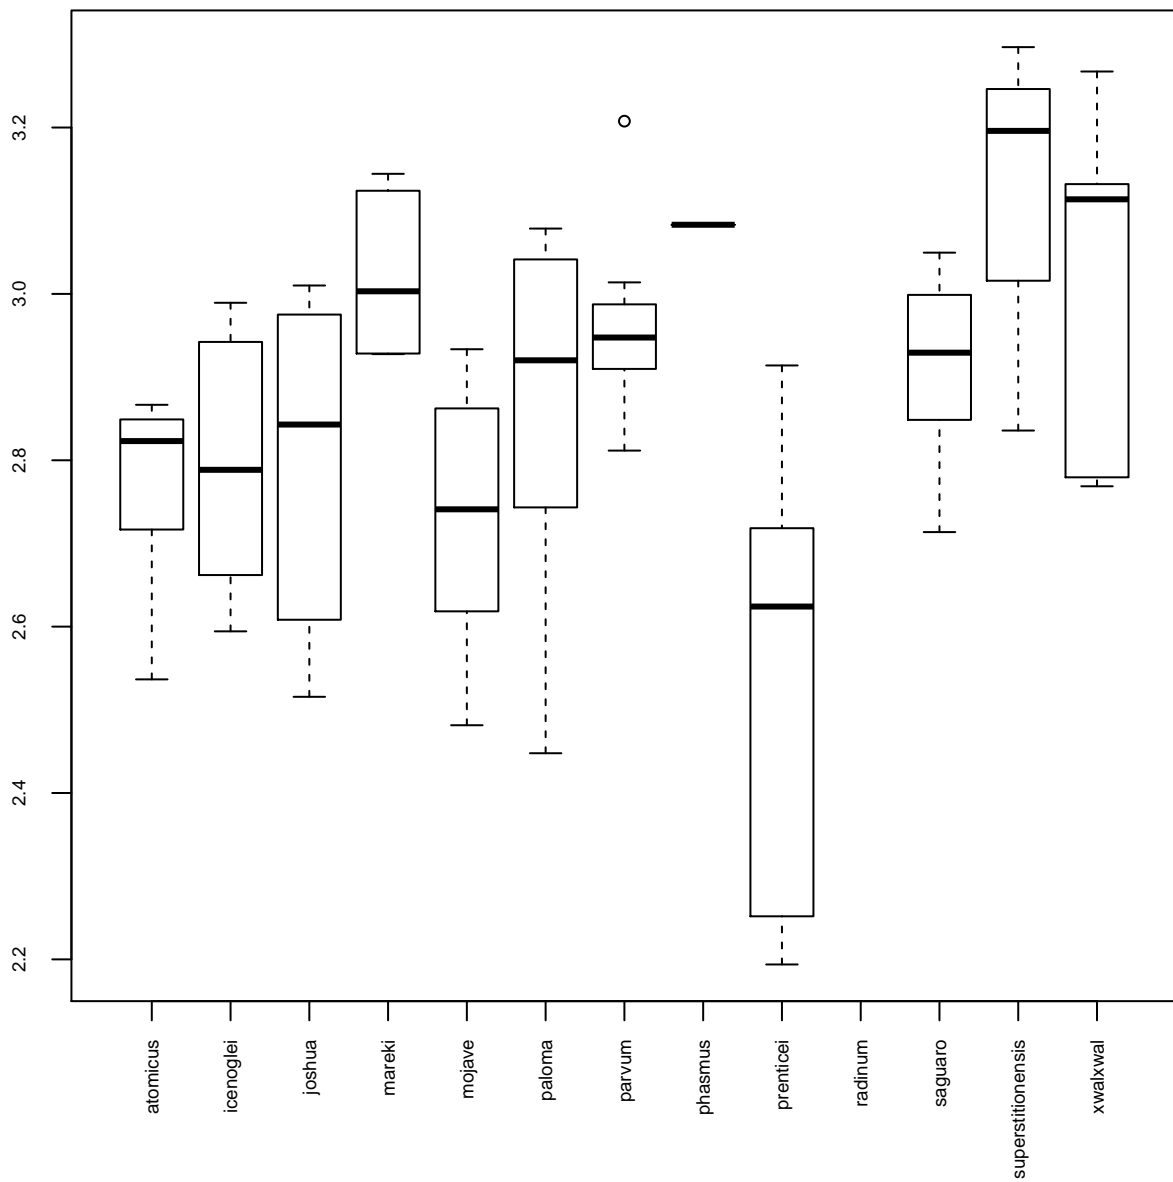

Supplement: Supplementary file 485

## Tarsus 3/Tarsus 4 ratio – females

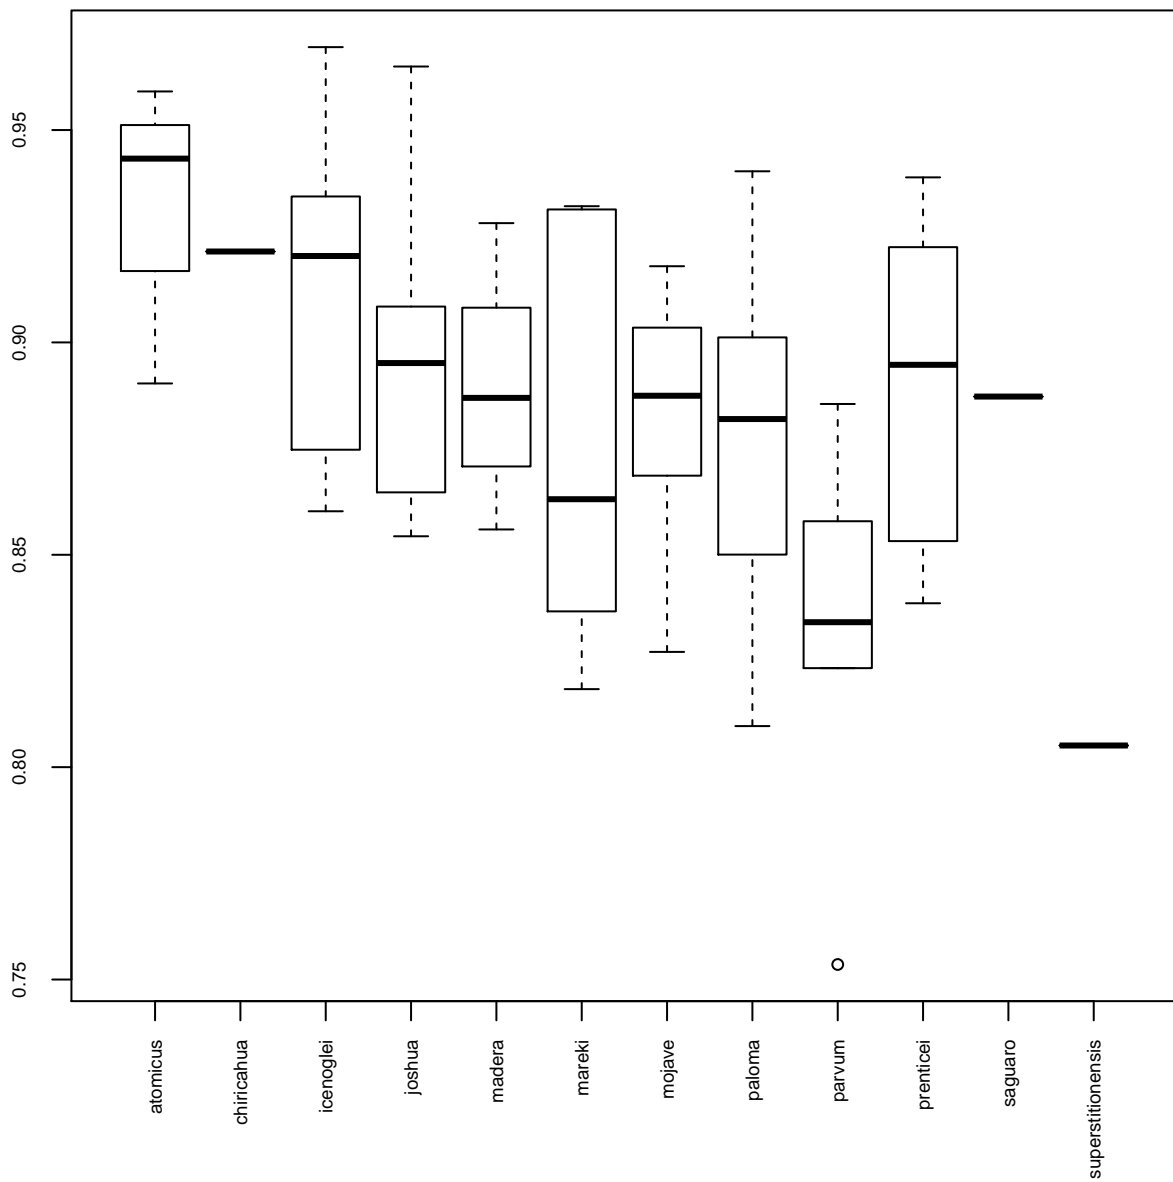

Supplement: Supplementary file 486

## Metatarsus 1/Patella 3 Length ratio – females

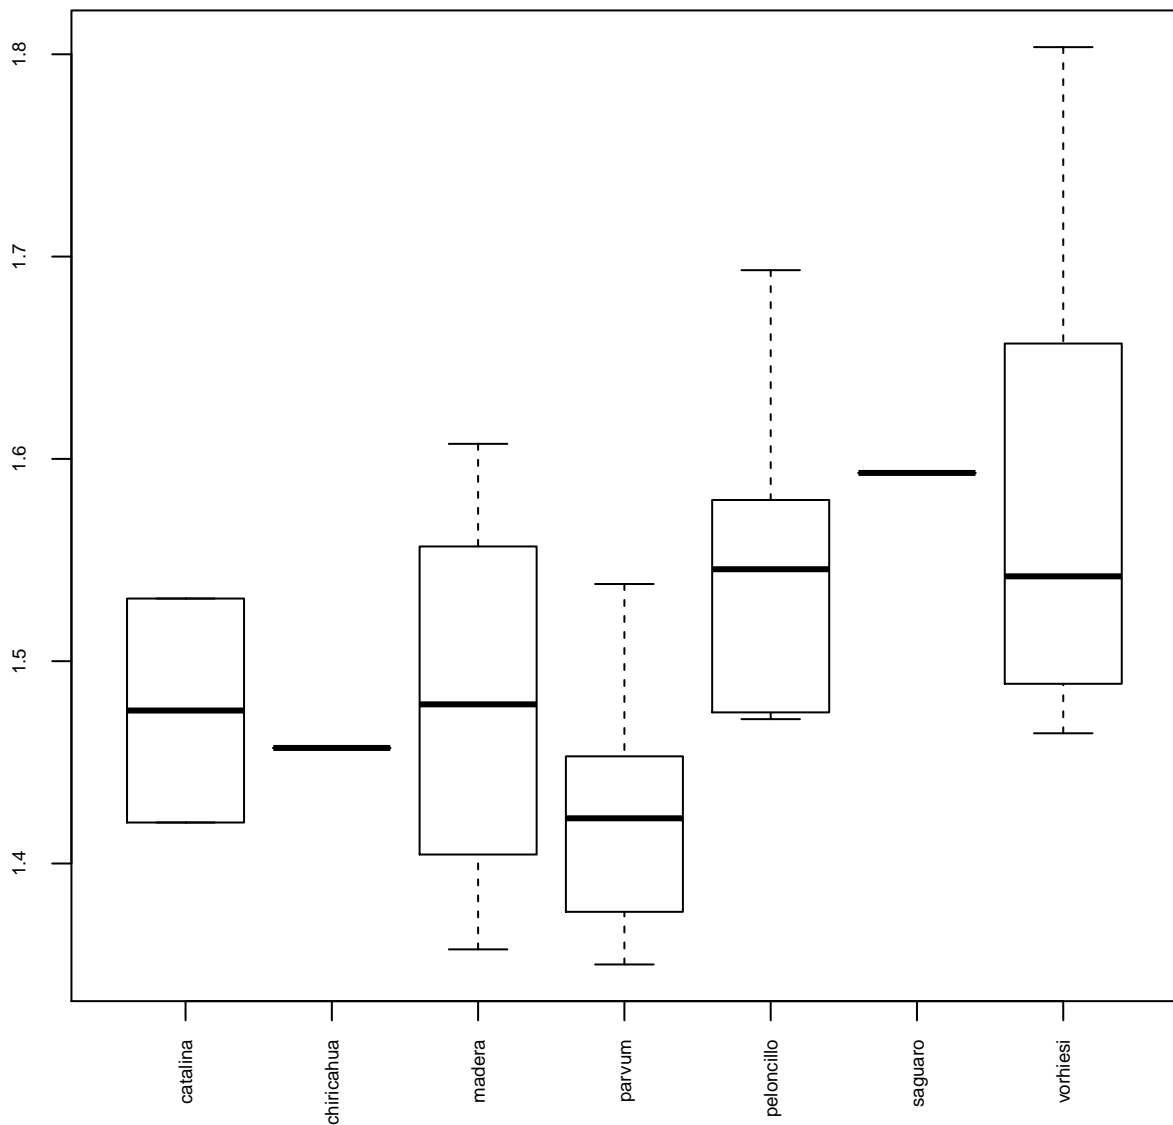

Supplement: Supplementary file 487

# Metatarsus 1/Tibia 4 Length ratio – males

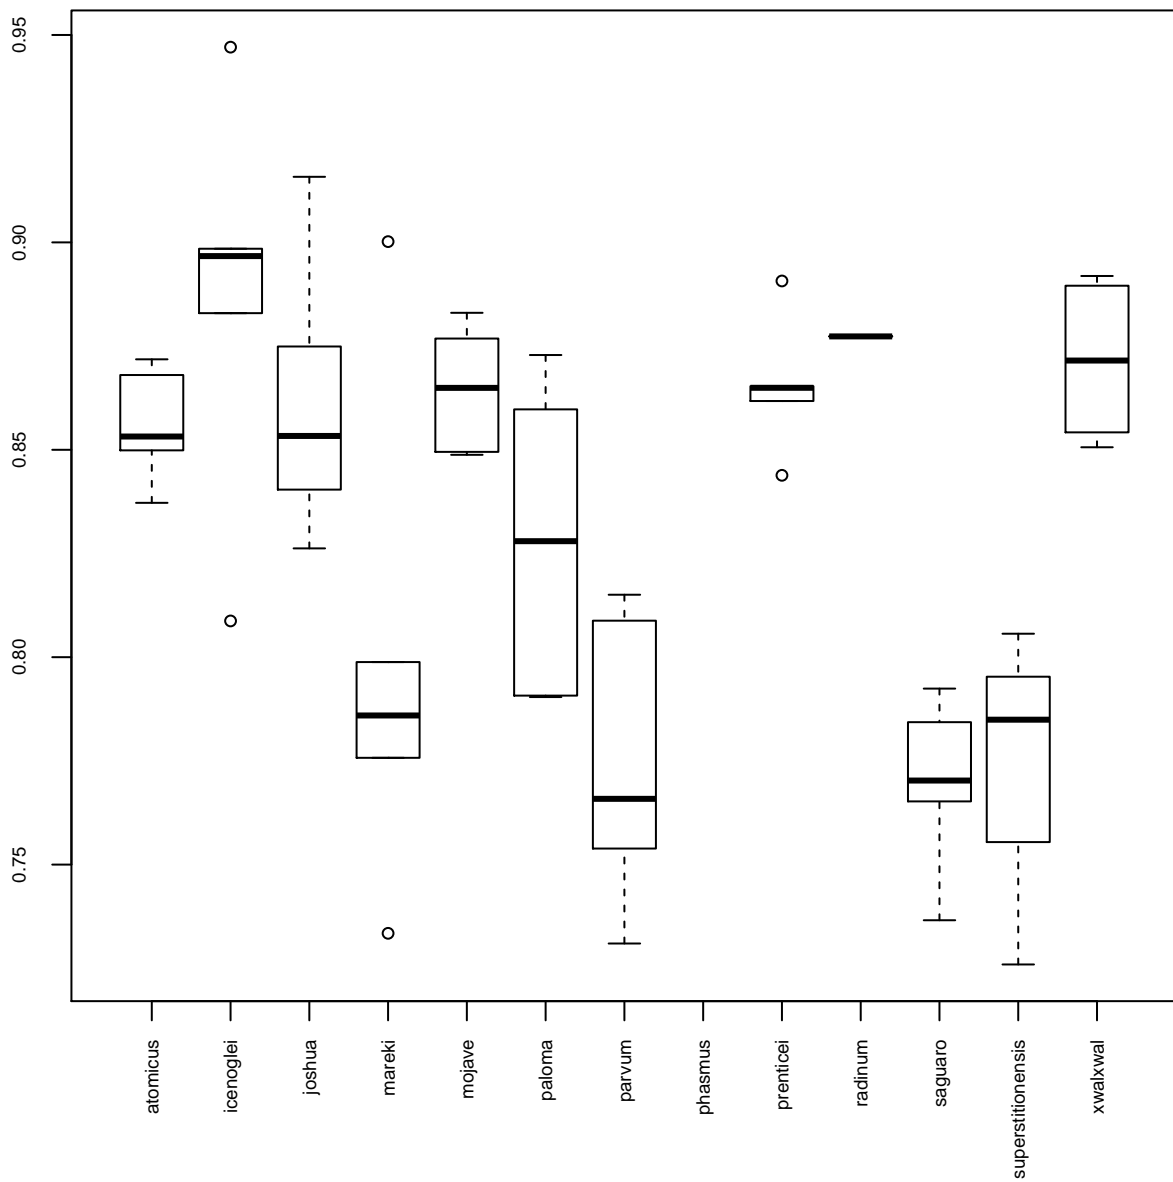

Supplement: Supplementary file 488

# Patella 1/Metatarsus 3 Length ratio – males

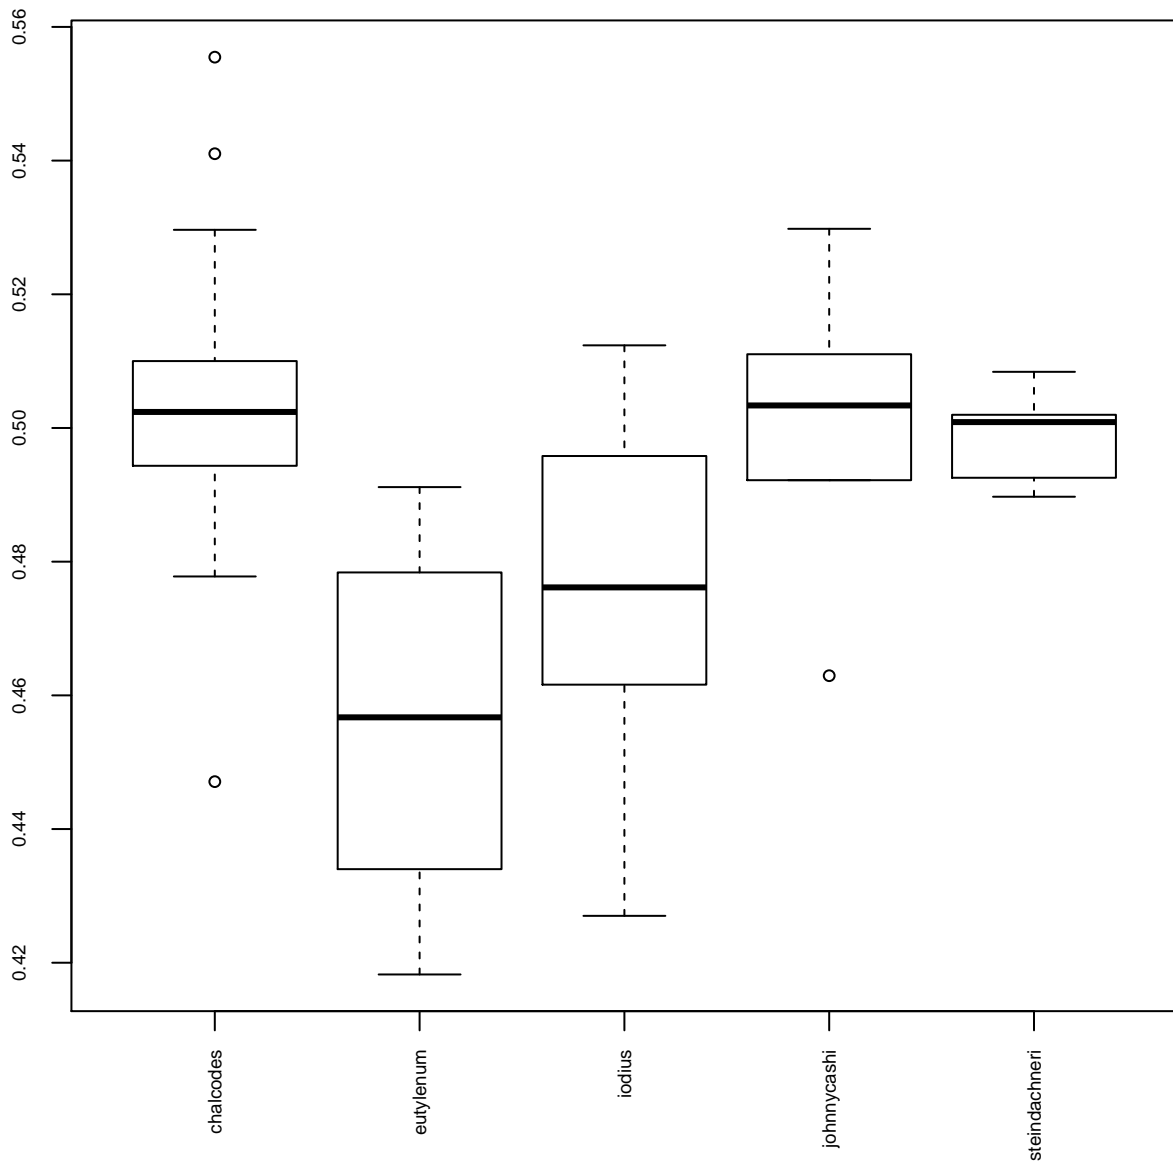

Supplement: Supplementary file 489

## Tarsus 3/Metatarsus 4 Length ratio – females

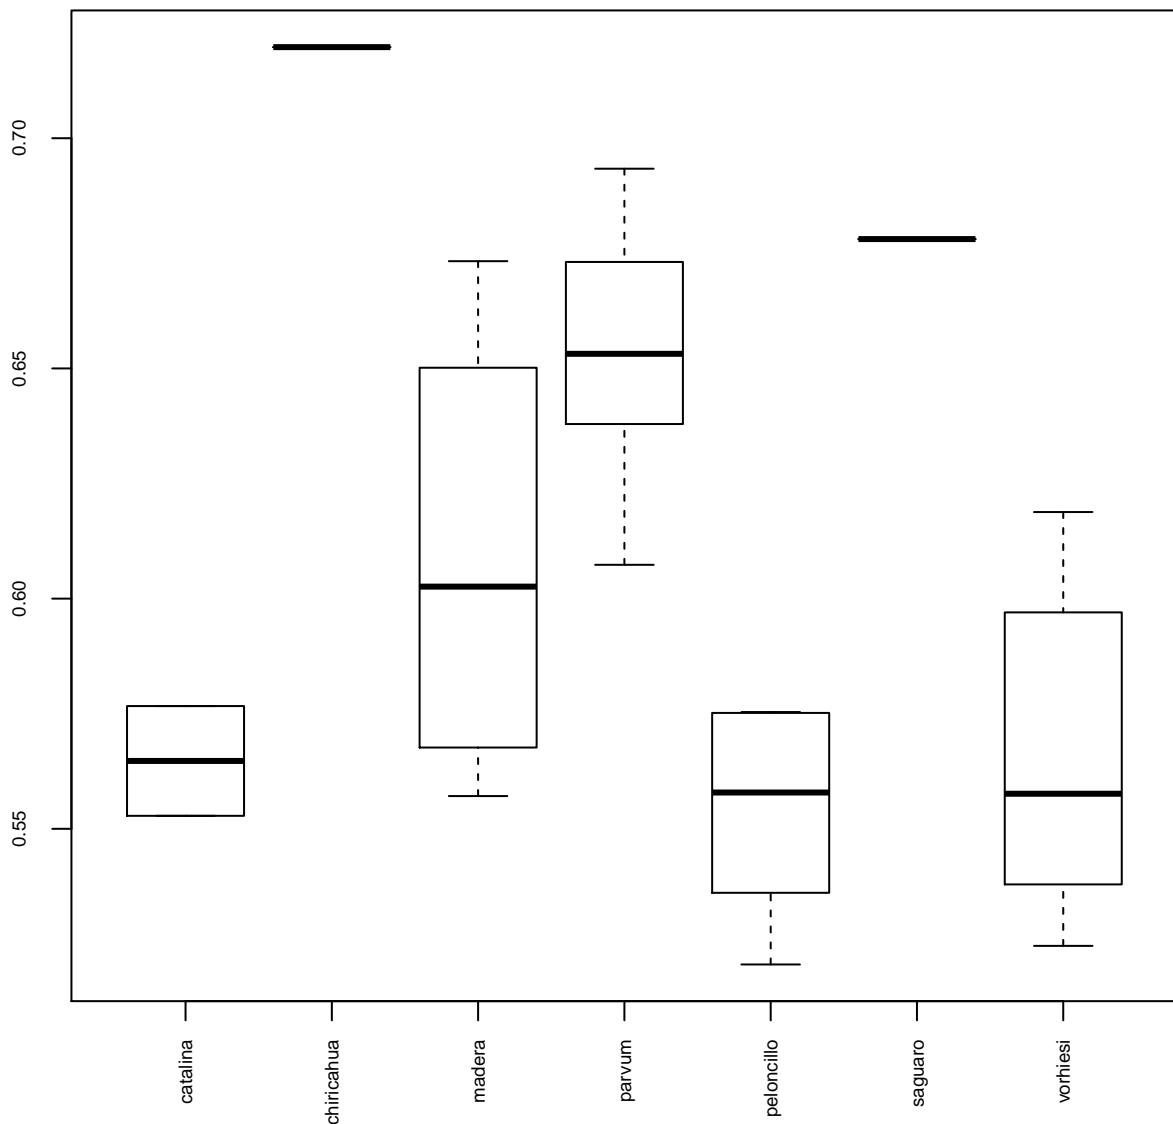

Supplement: Supplementary file 490

## Tarsus 1/Metatarsus 3 Length ratio – males

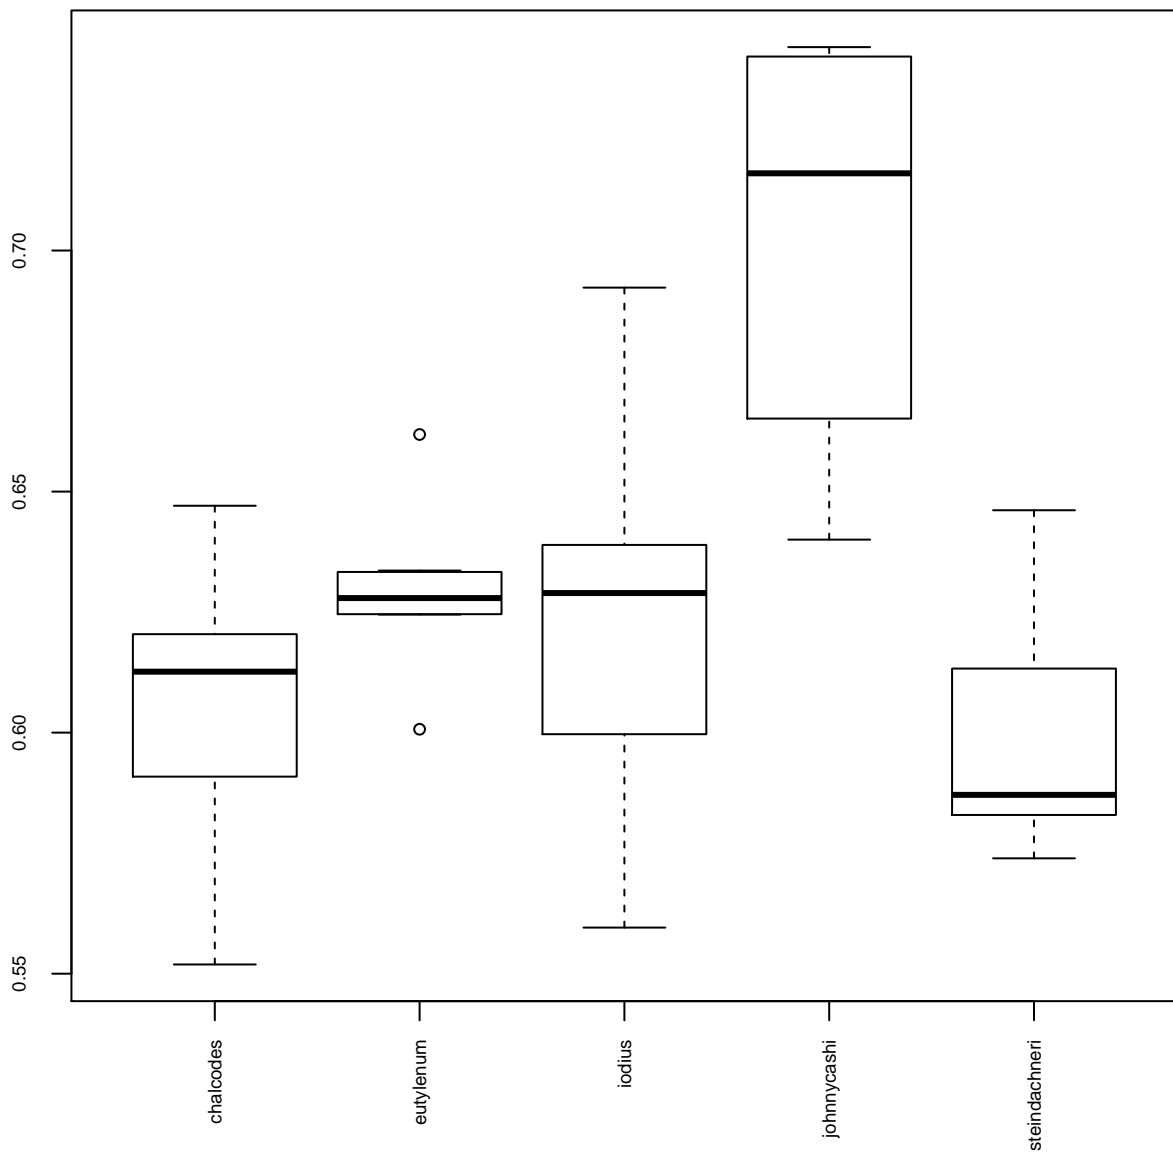

Supplement: Supplementary file 491

## Femur 1/Patella 4 ratio – females

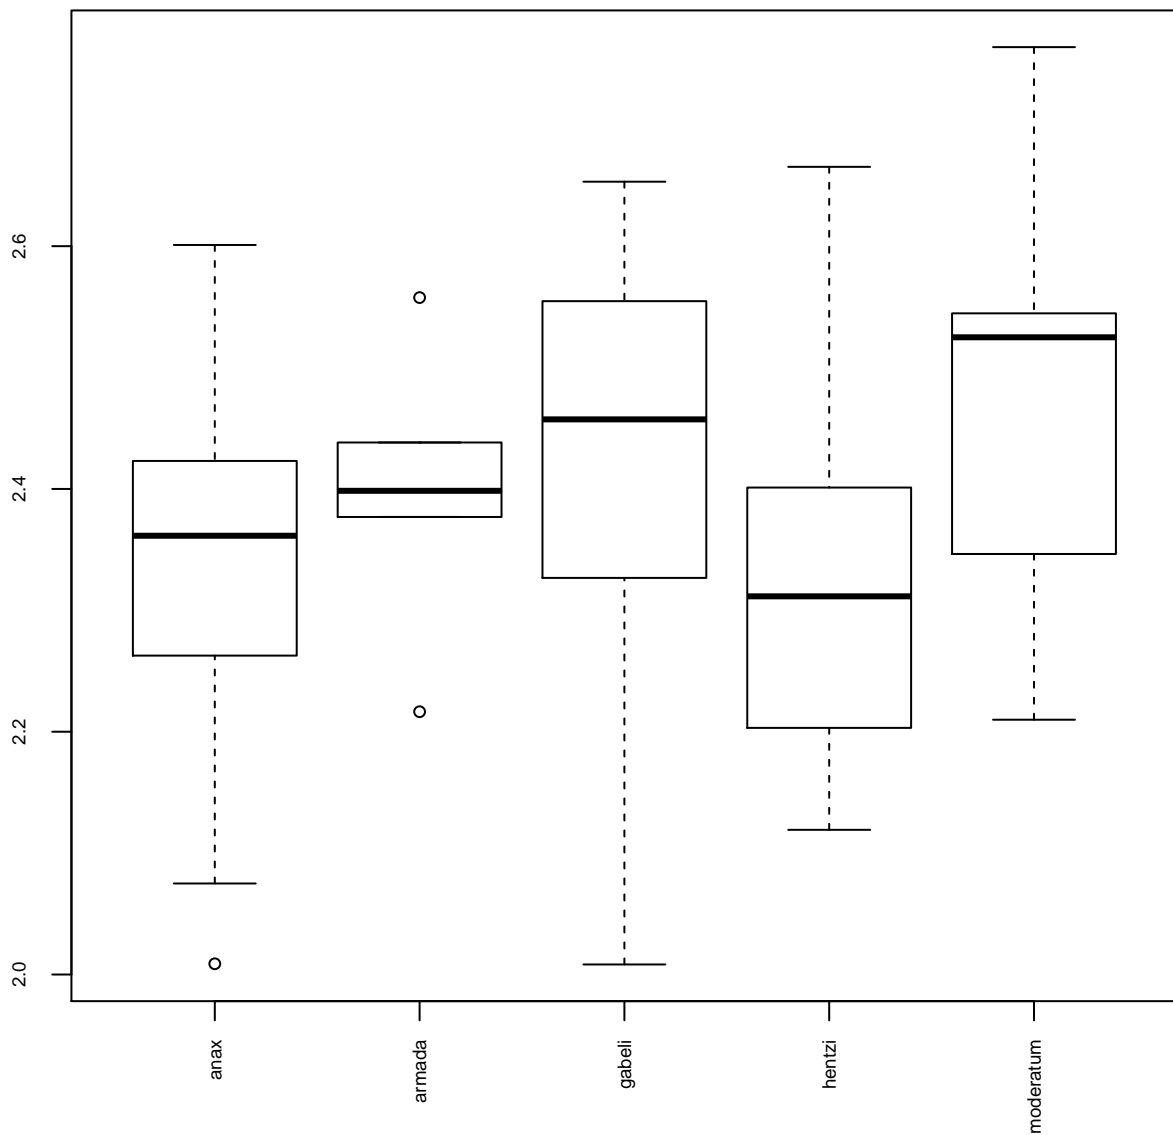

Supplement: Supplementary file 492

## Metatarsus 1/Tarsus 3 Length ratio – males

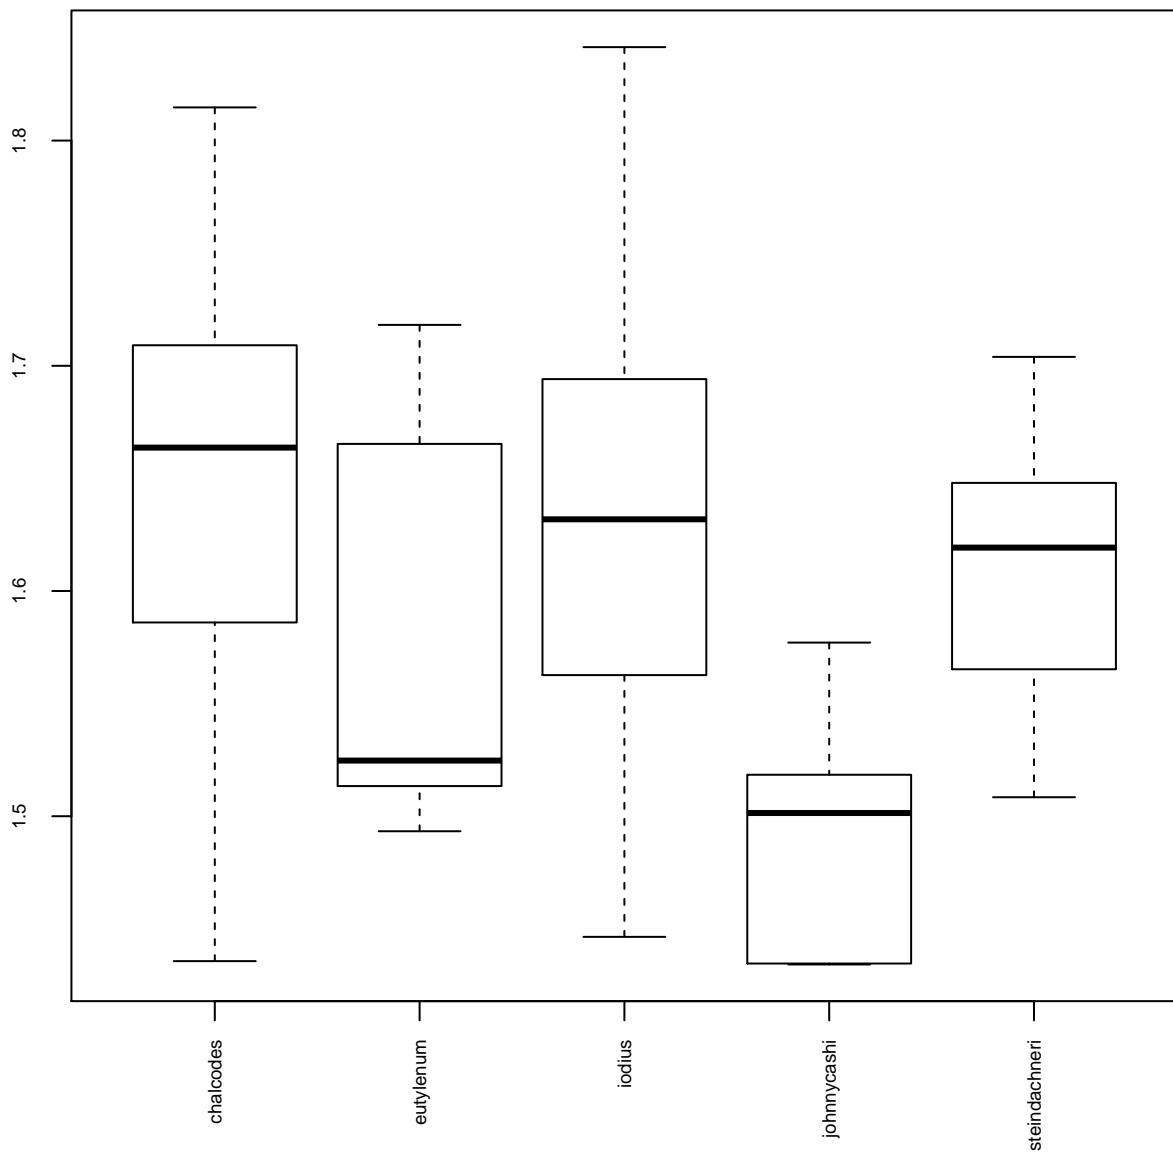

Supplement: Supplementary file 493

## Patella 3/Tibia 3 ratio – females

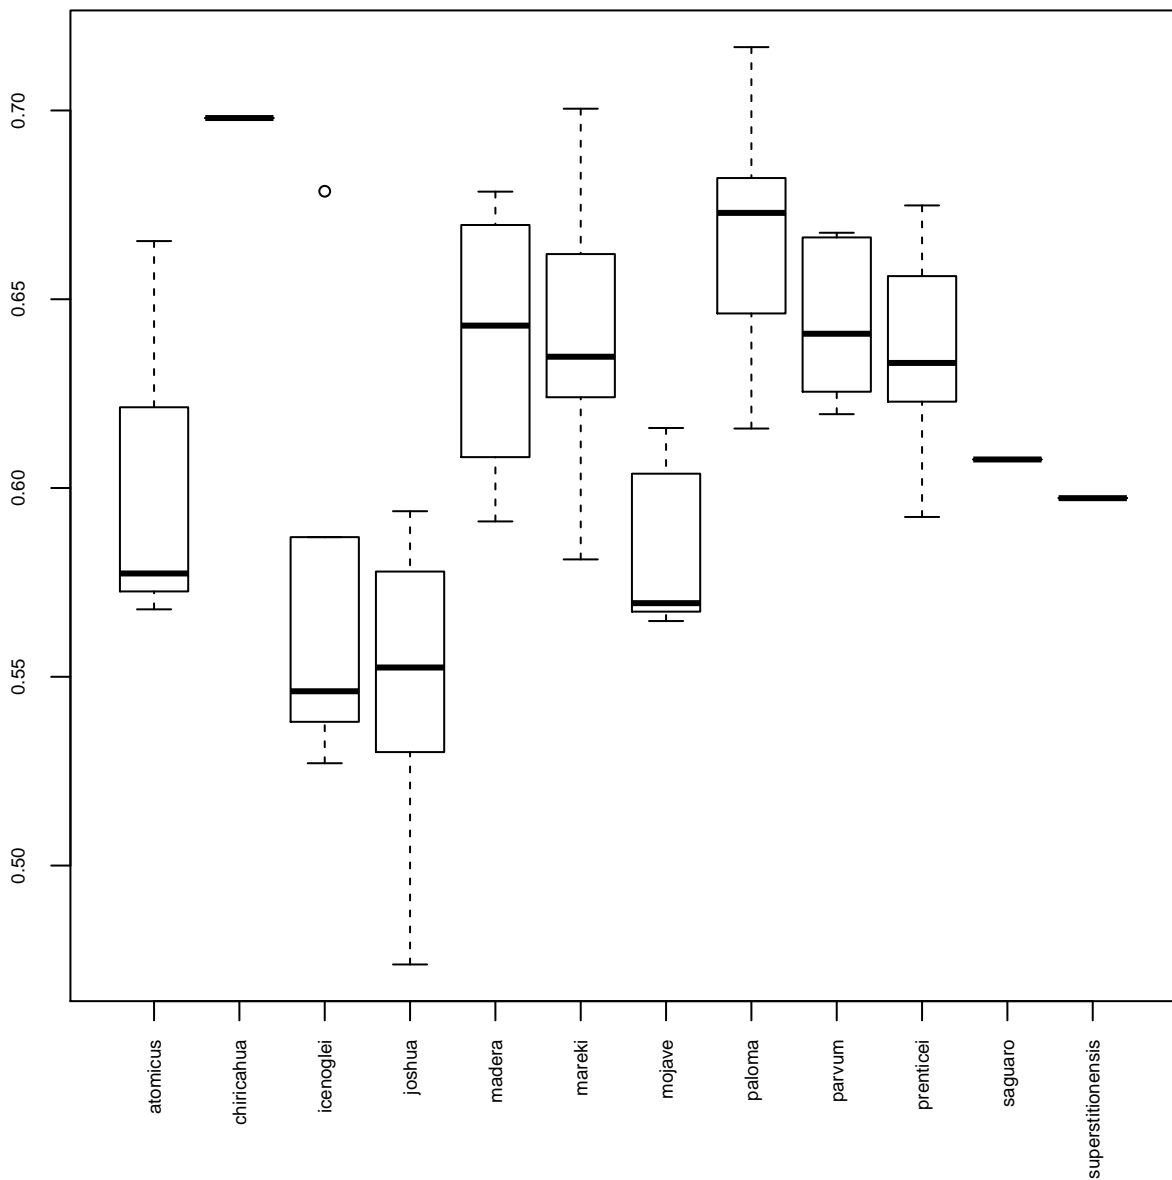

Supplement: Supplementary file 494

## Femur 1/Tarsus 4 ratio – females

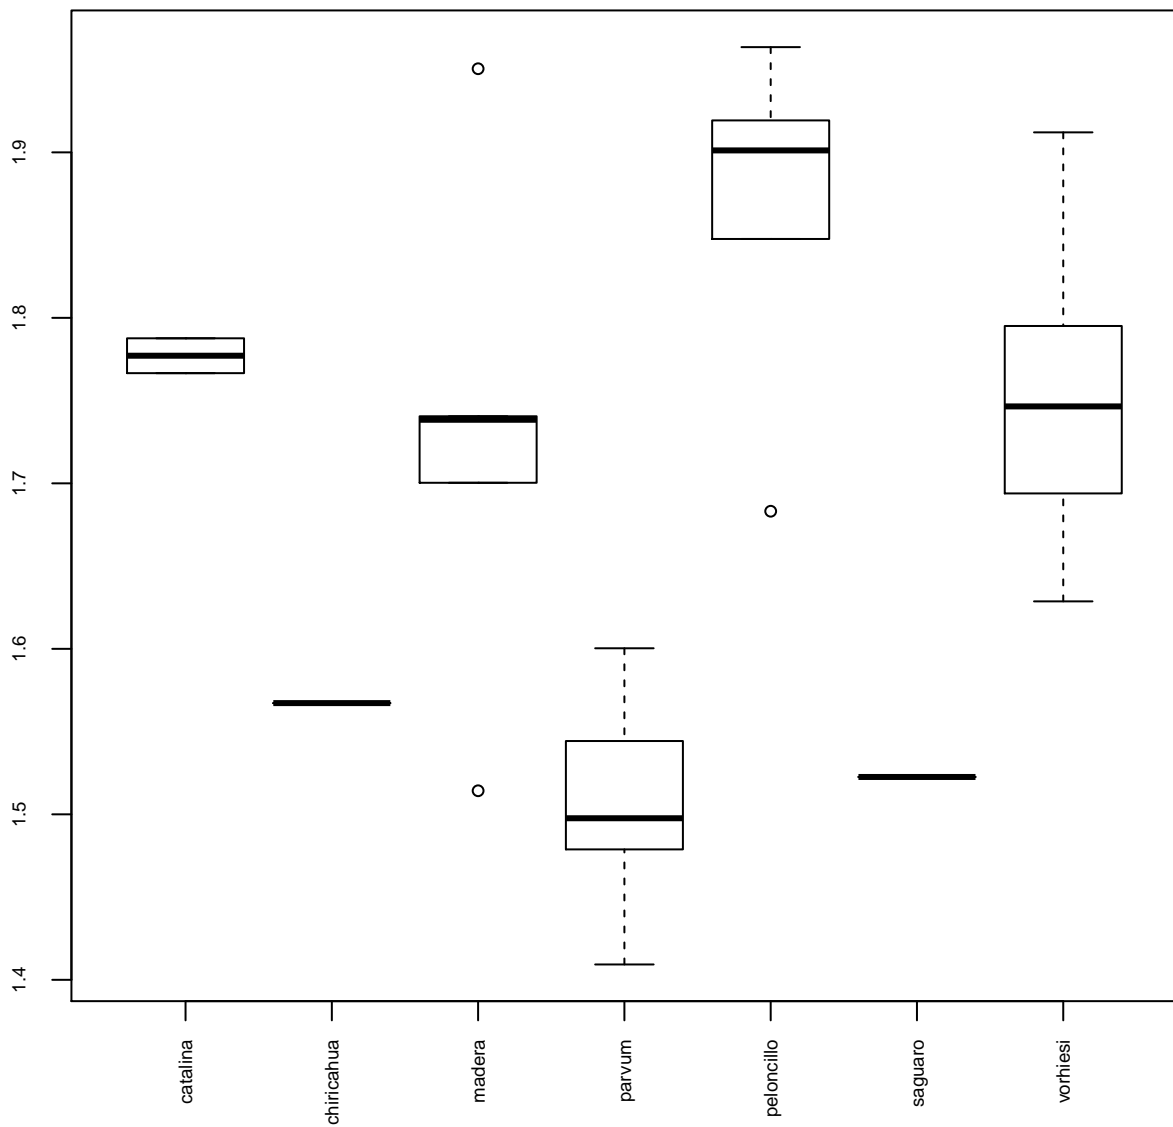

Supplement: Supplementary file 495

Palpal Tibia/Patella 4 Length ratio – males

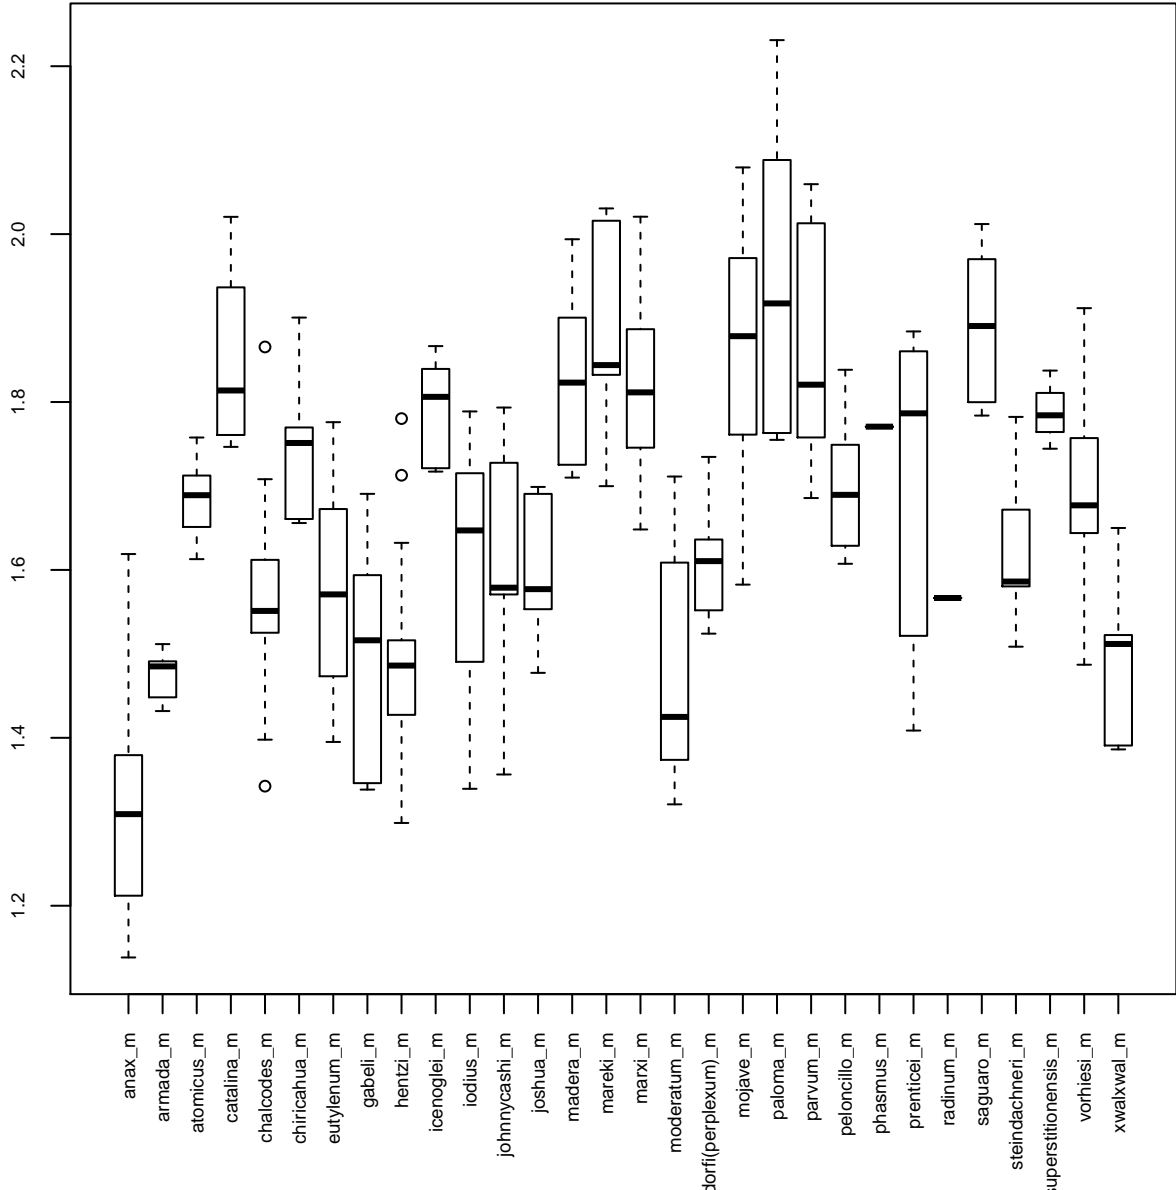

Supplement: Supplementary file 496

# Tarsus 1/Tarsus 3 ratio – females

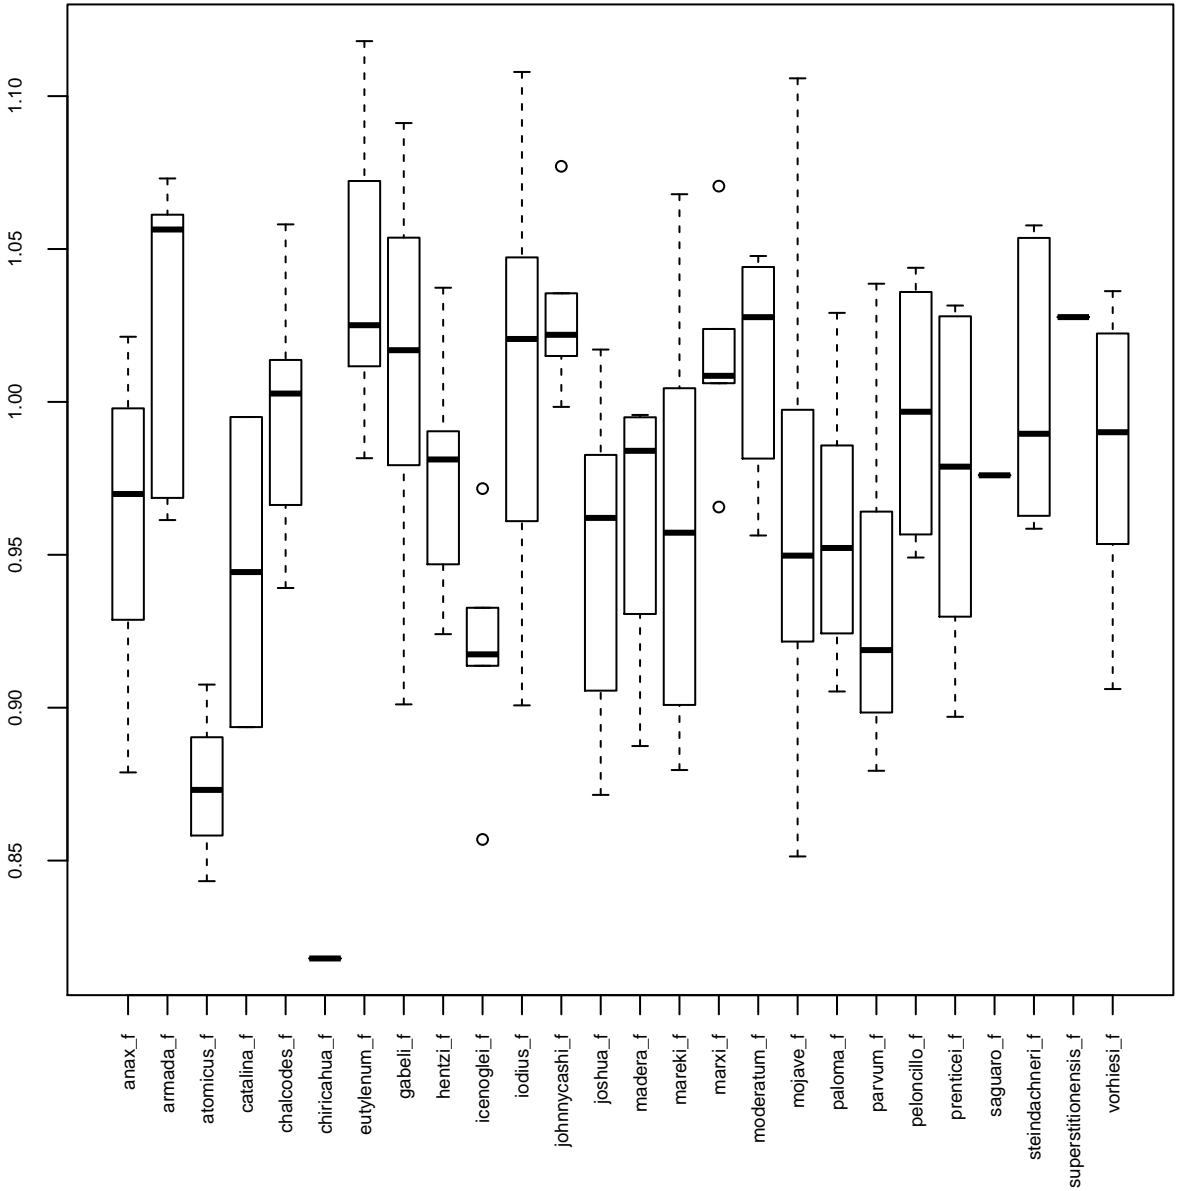

Supplement: Supplementary file 497

## Metatarsus 3/Tarsus 3 ratio – females

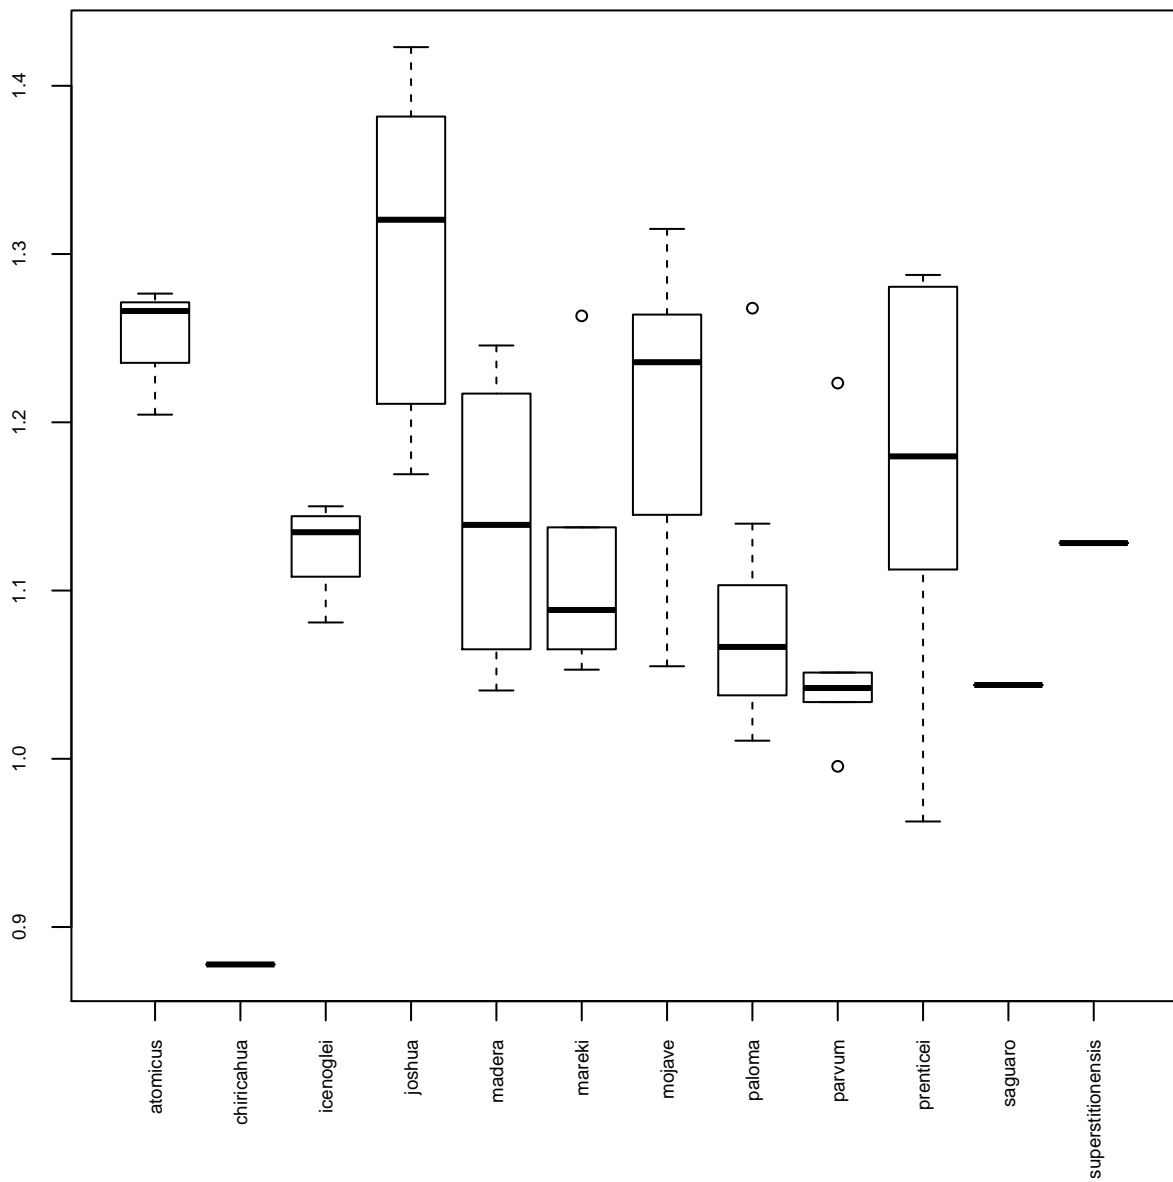

Supplement: Supplementary file 498

## Femur 1/Metatarsus 4 ratio – males

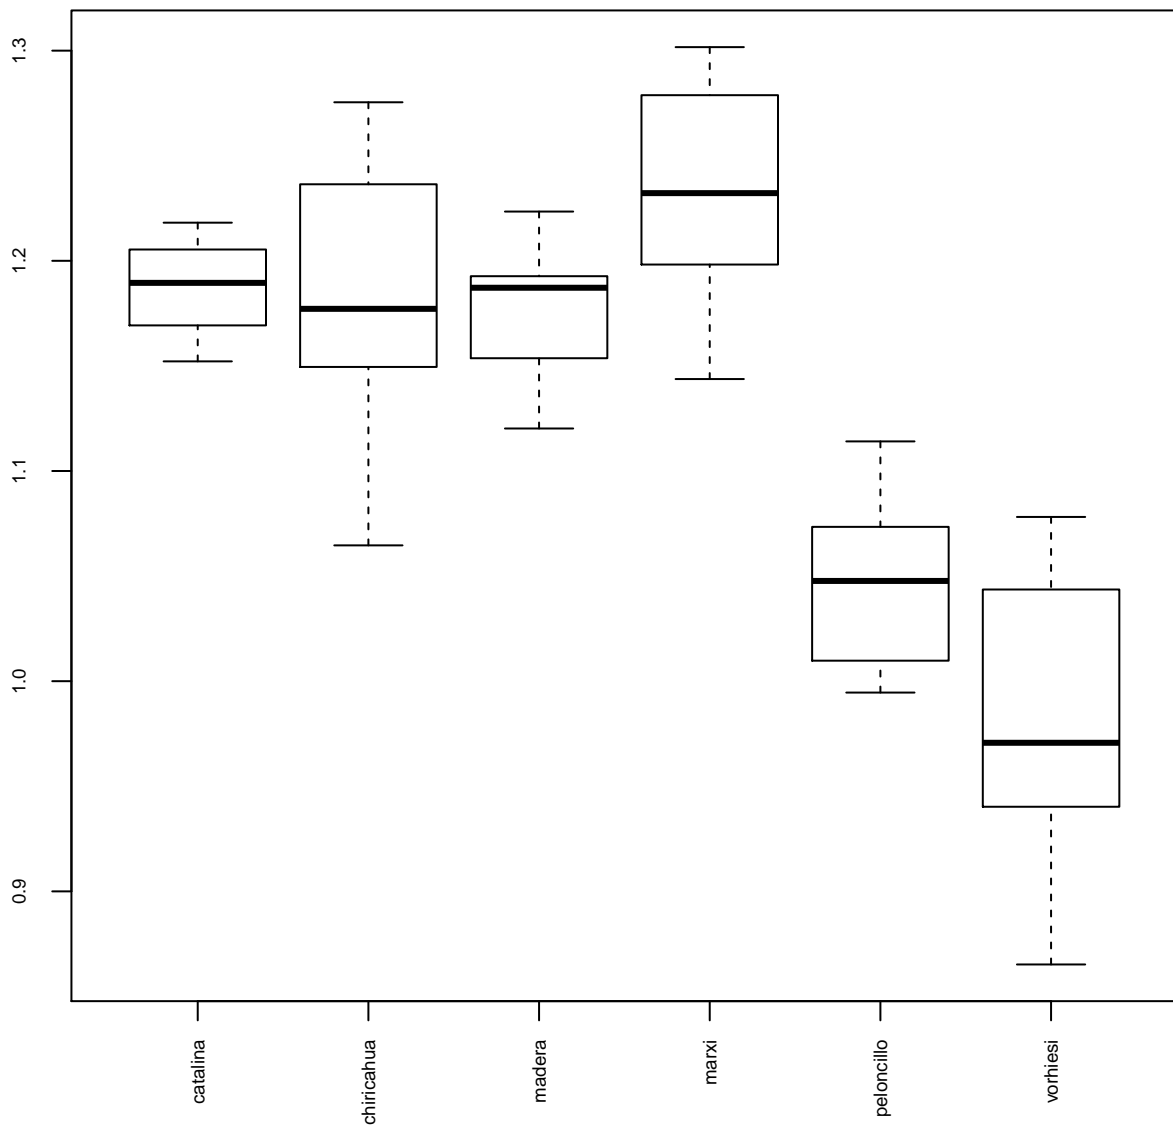

Supplement: Supplementary file 499

## Palpal Tibia/Metatarsus 3 Length ratio – males

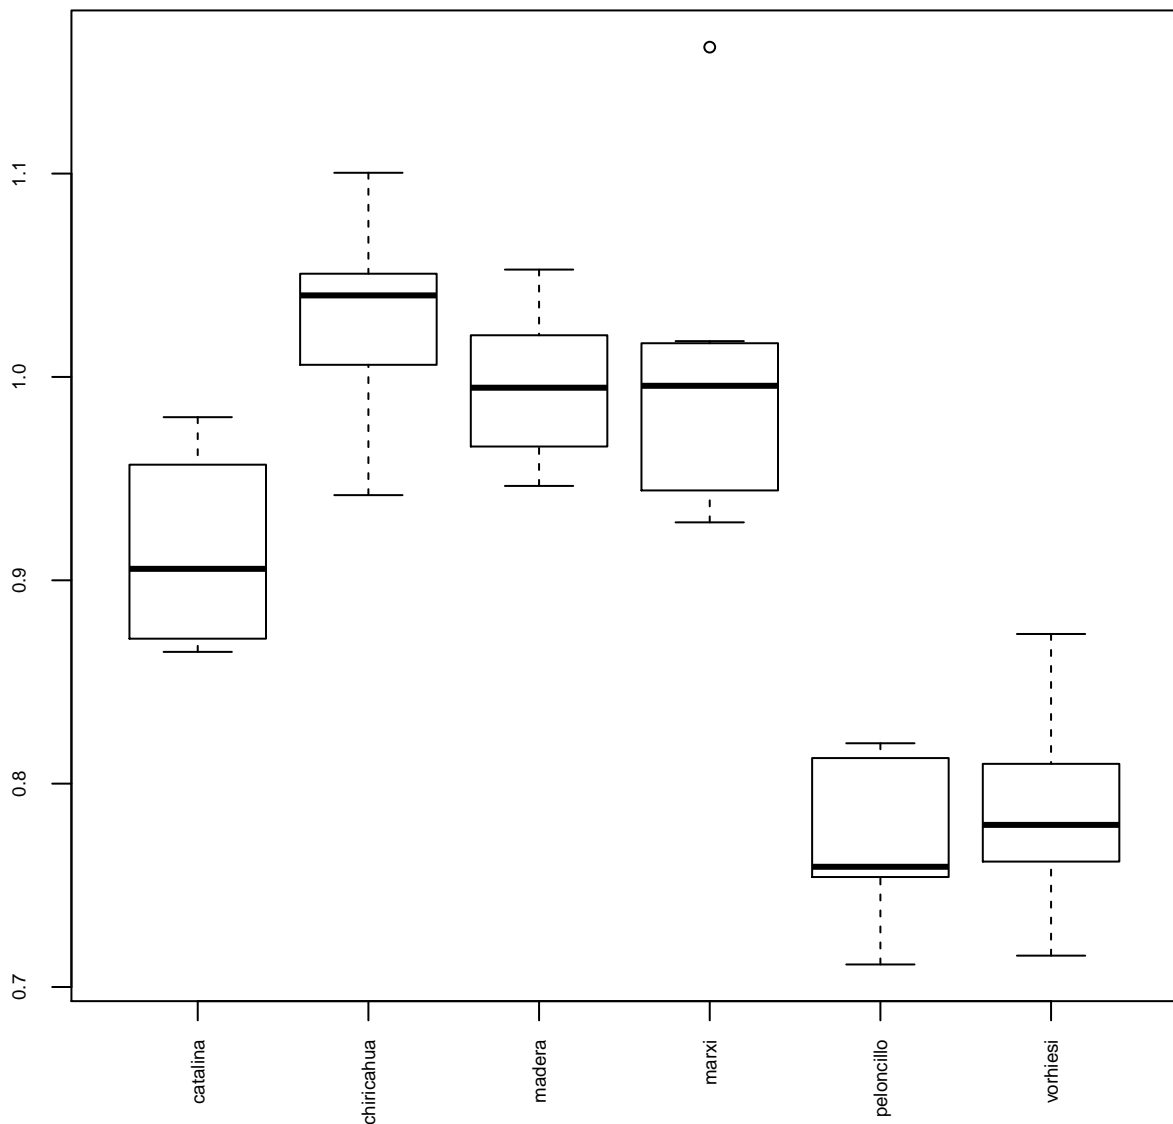

Supplement: Supplementary file 500
