# Supplementary material (part 6 of 15)
Source: publisher site journal article supplement (http://zookeys.pensoft.net/article/6264/download/suppl/32/)

## Femur 1/Patella 3 ratio – males

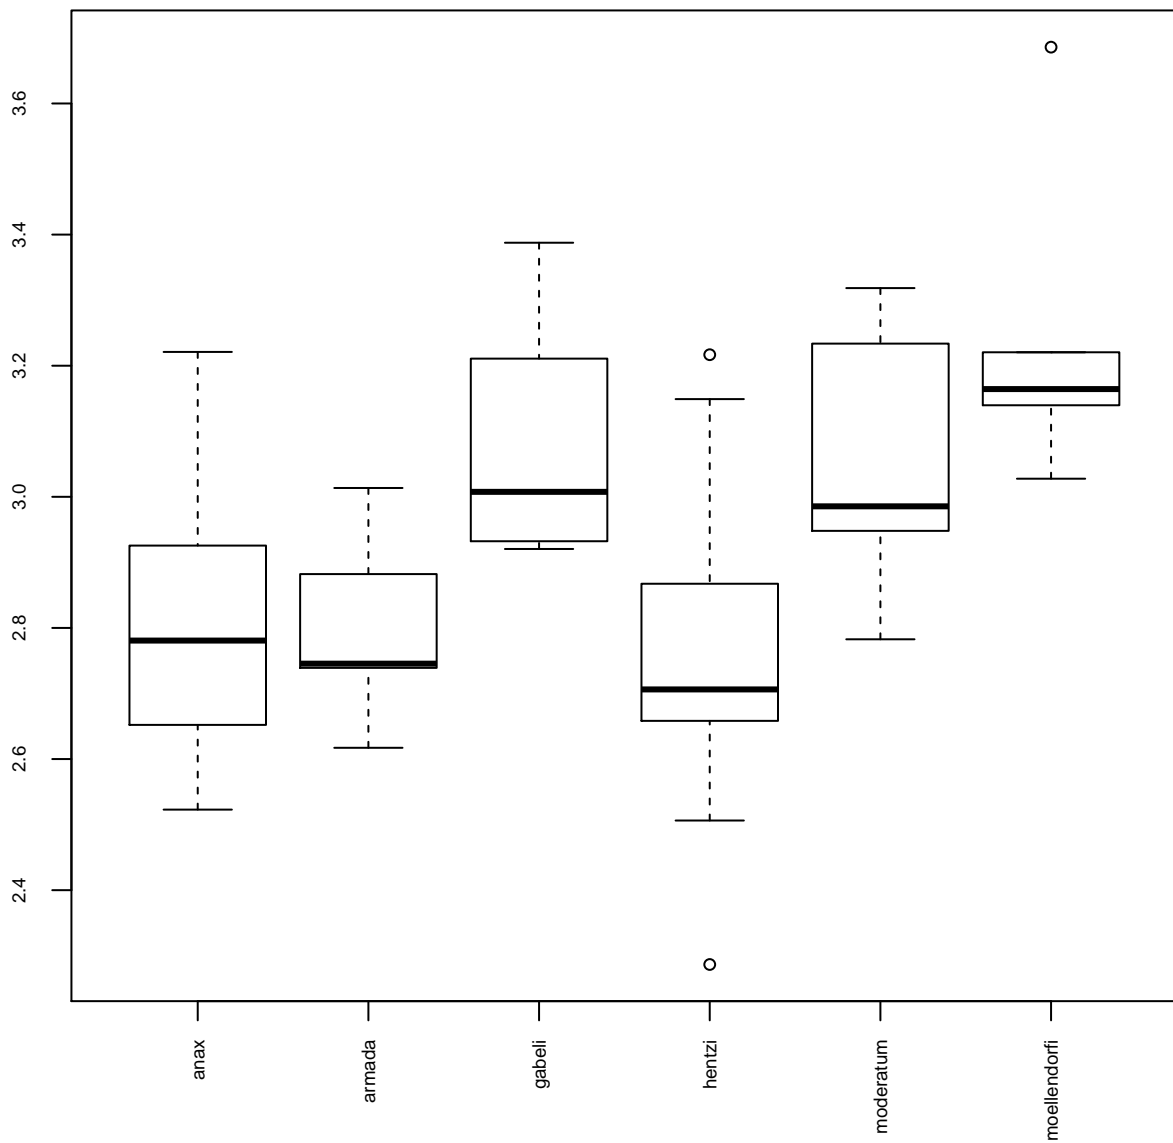

Supplement: Supplementary file 501

## Metatarsus 1/Tibia 3 Length ratio – males

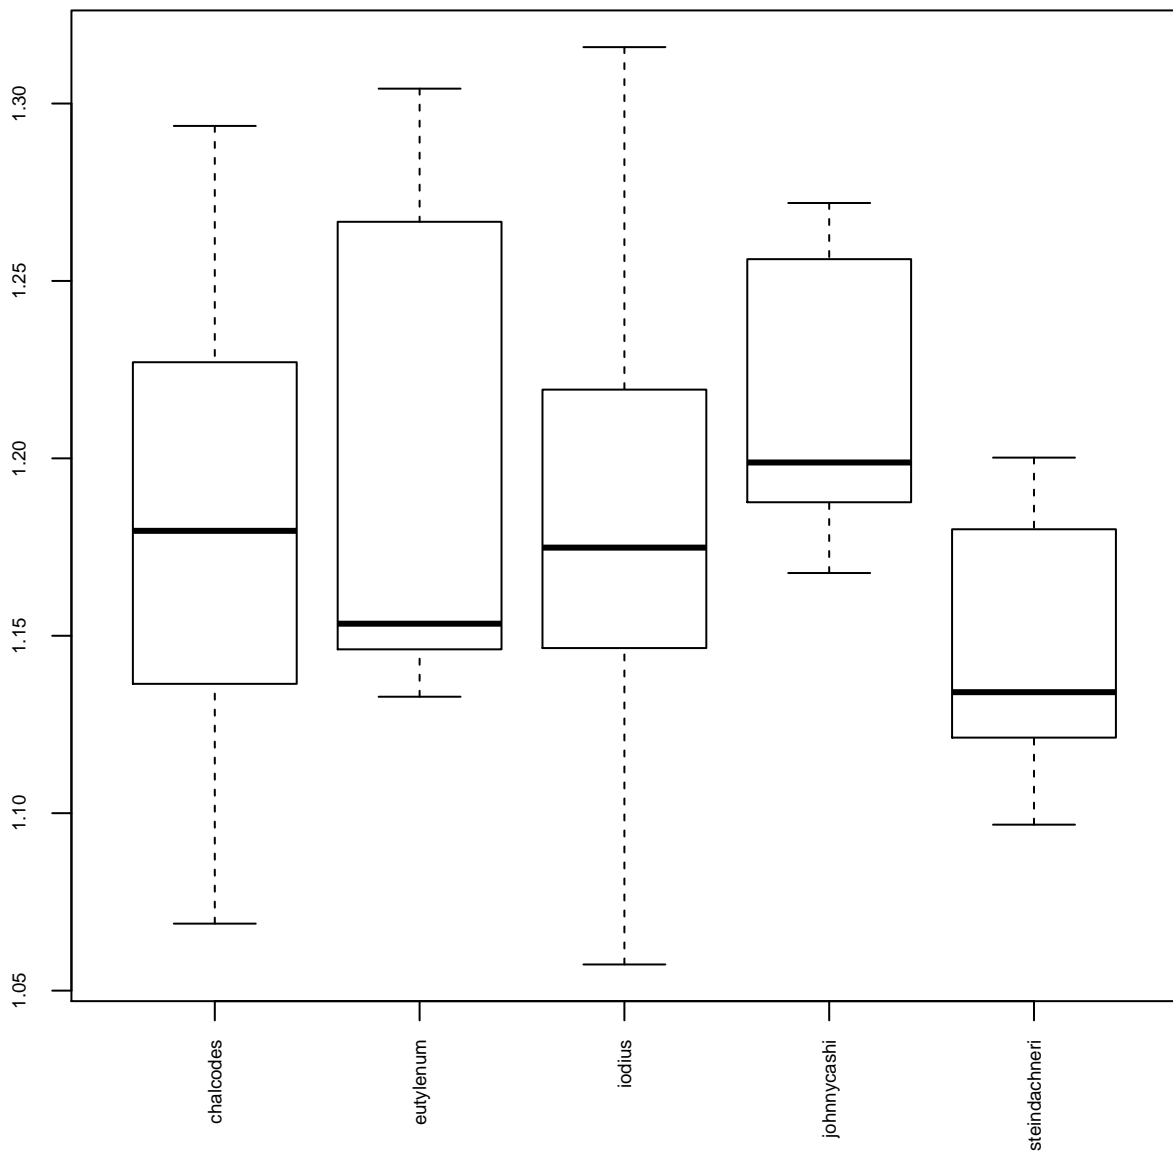

Supplement: Supplementary file 502

# Patella 1/Metatarsus 4 Length ratio – males

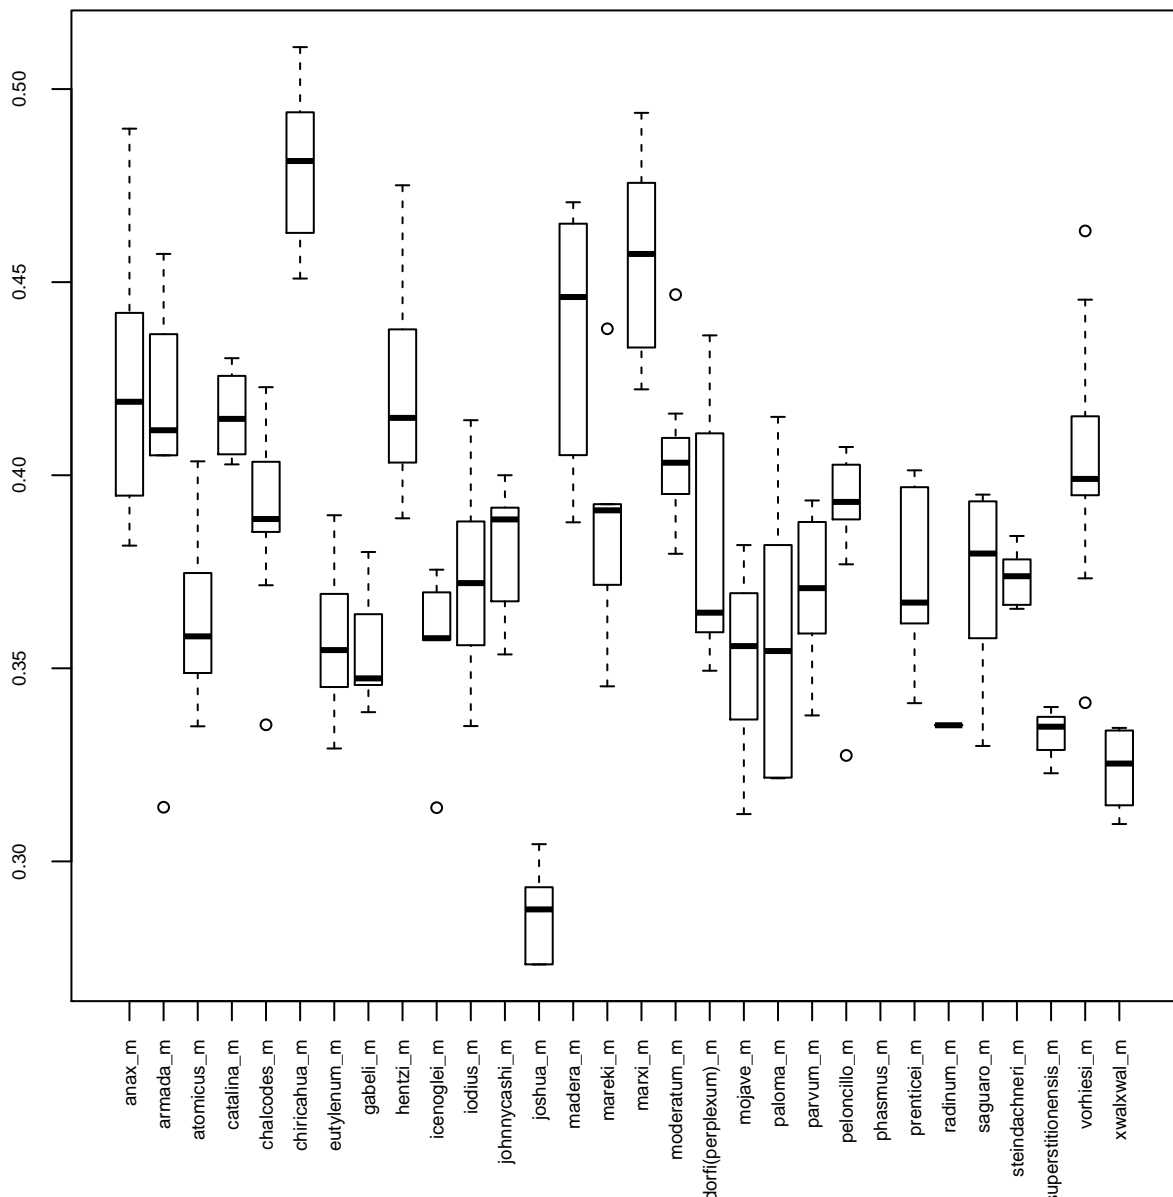

Supplement: Supplementary file 503

## Carapace Length/Patella 1 ratio – males

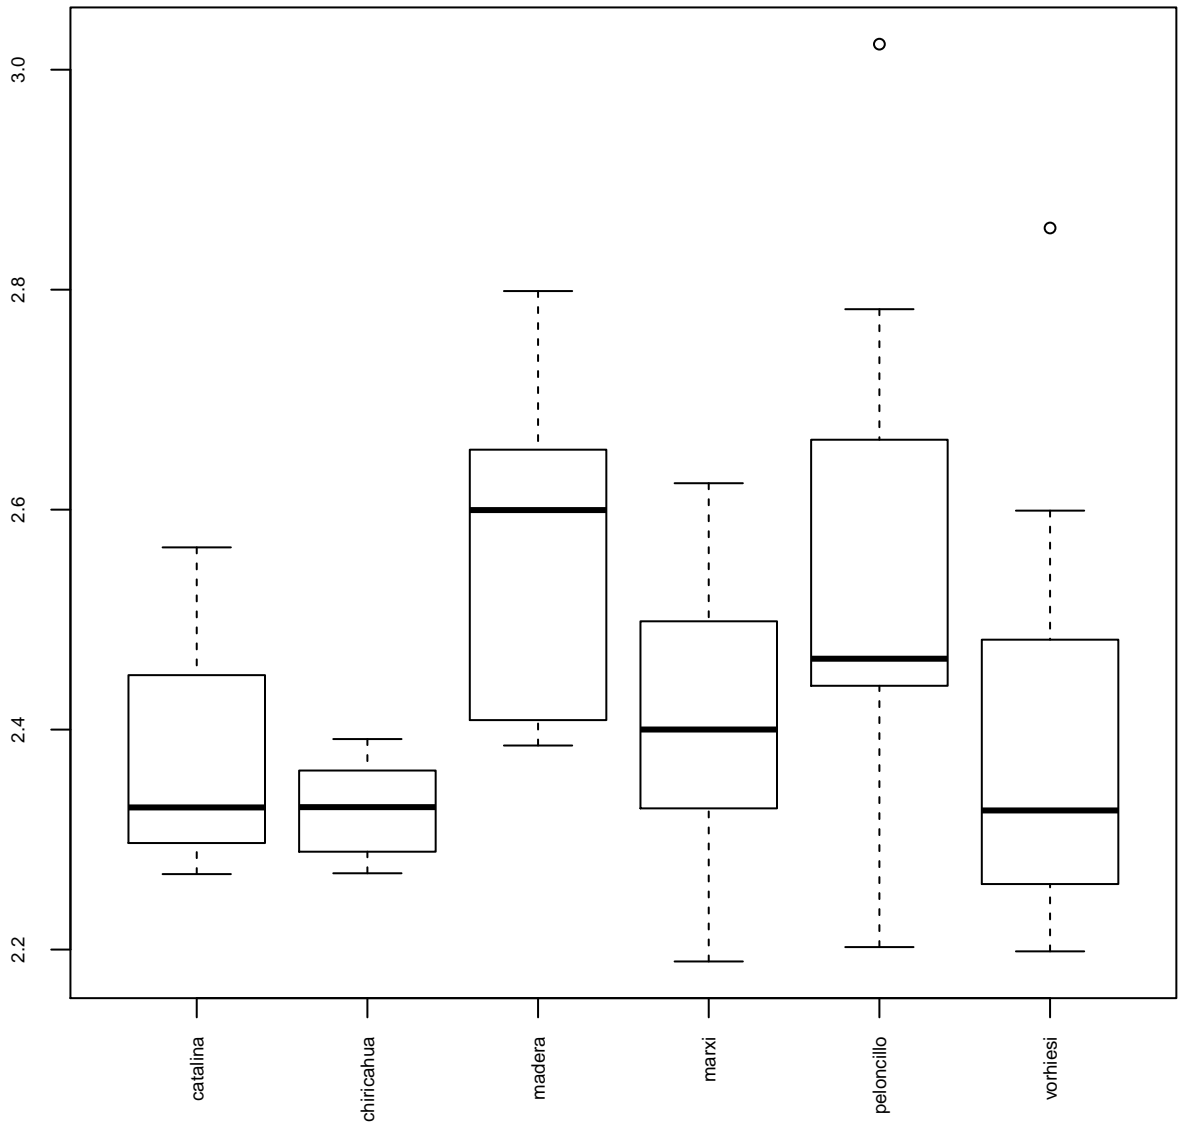

Supplement: Supplementary file 504

# Labial Length/Width ratio – females

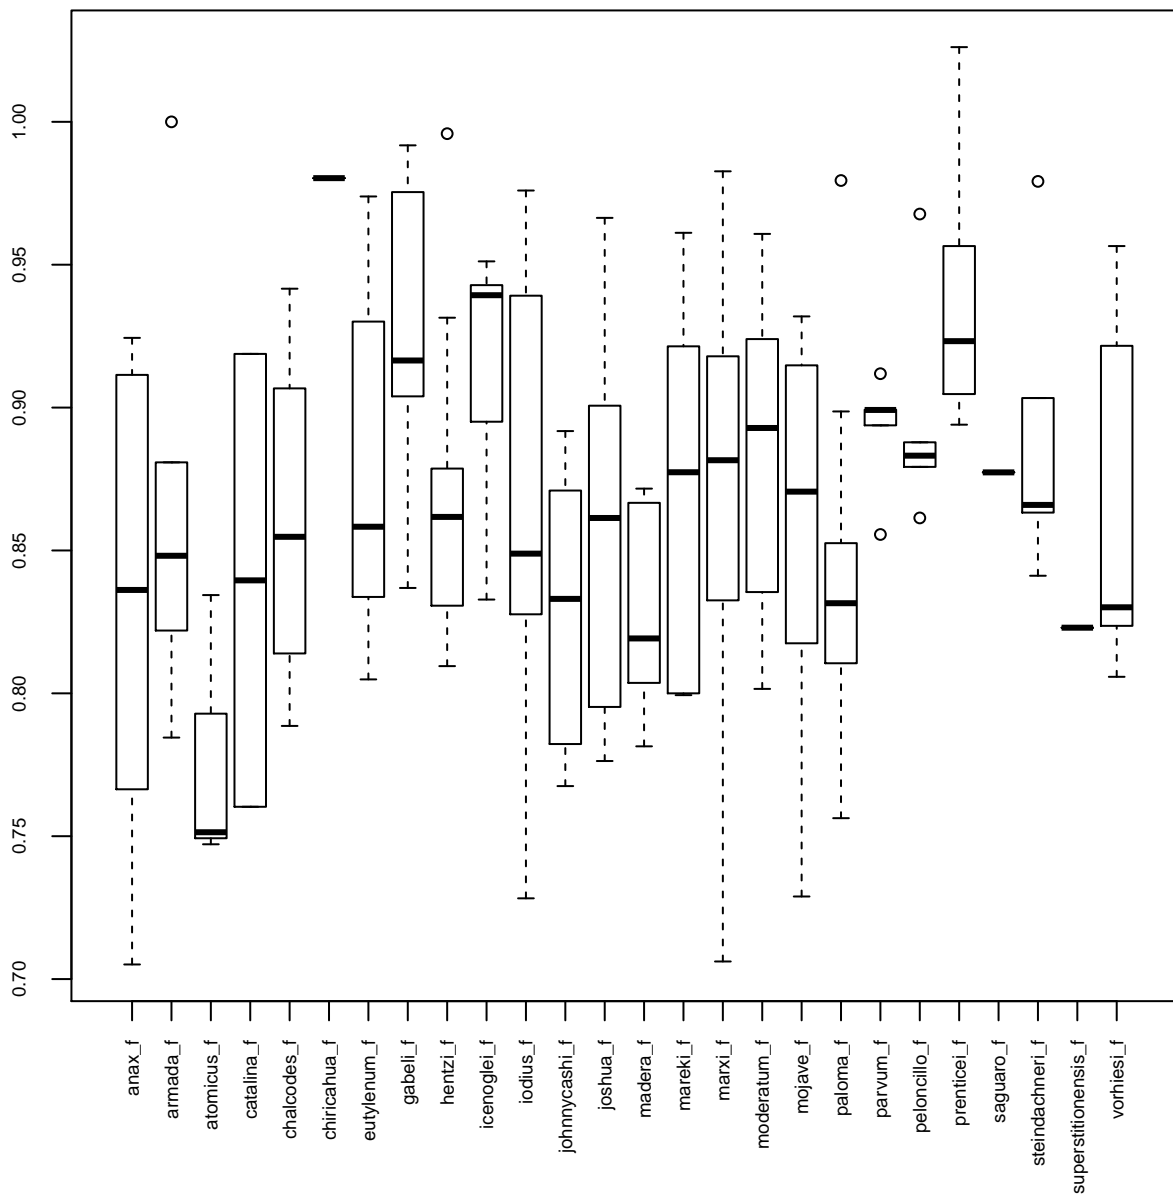

Supplement: Supplementary file 505

# Femur 1/Metatarsus 4 ratio – males

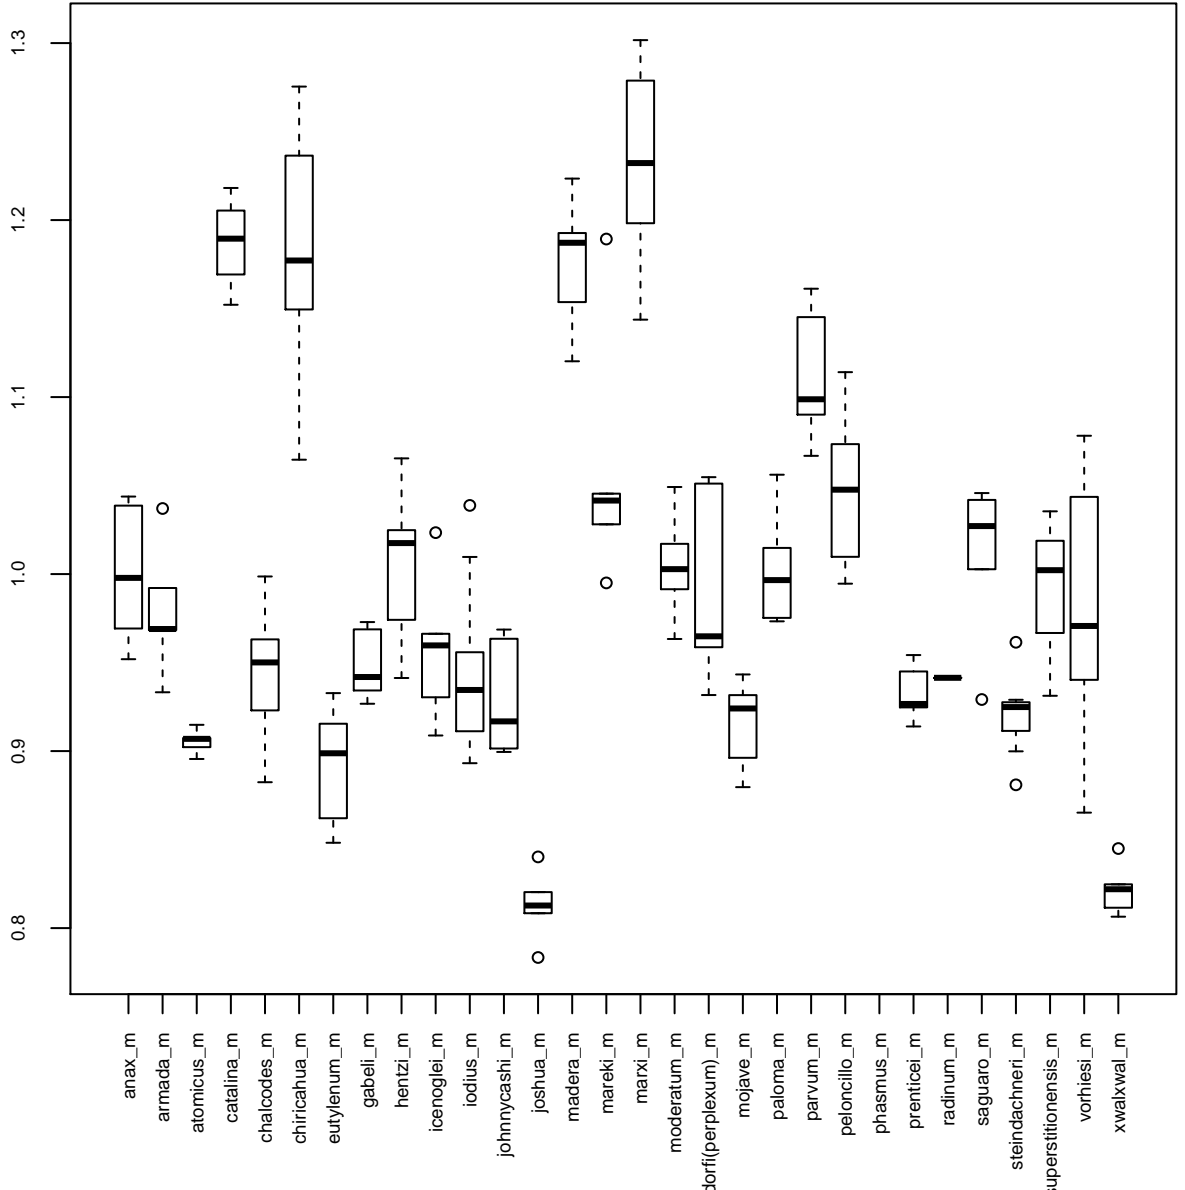

Supplement: Supplementary file 506

## Carapace Length/Metatarsus 4 ratio – males

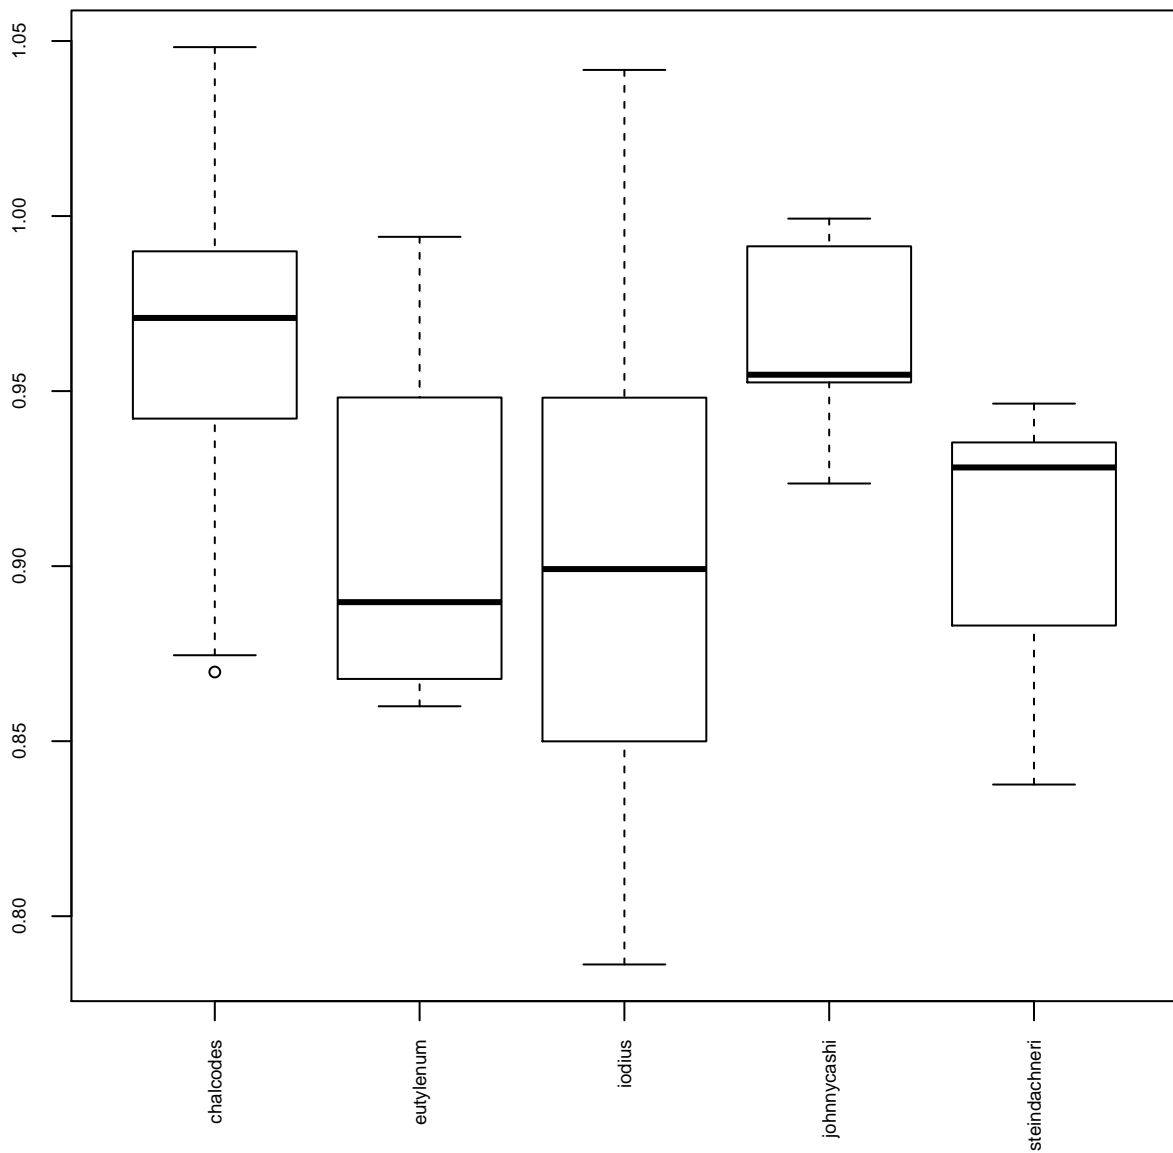

Supplement: Supplementary file 507

## Metatarsus 3/Tarsus 3 ratio – females

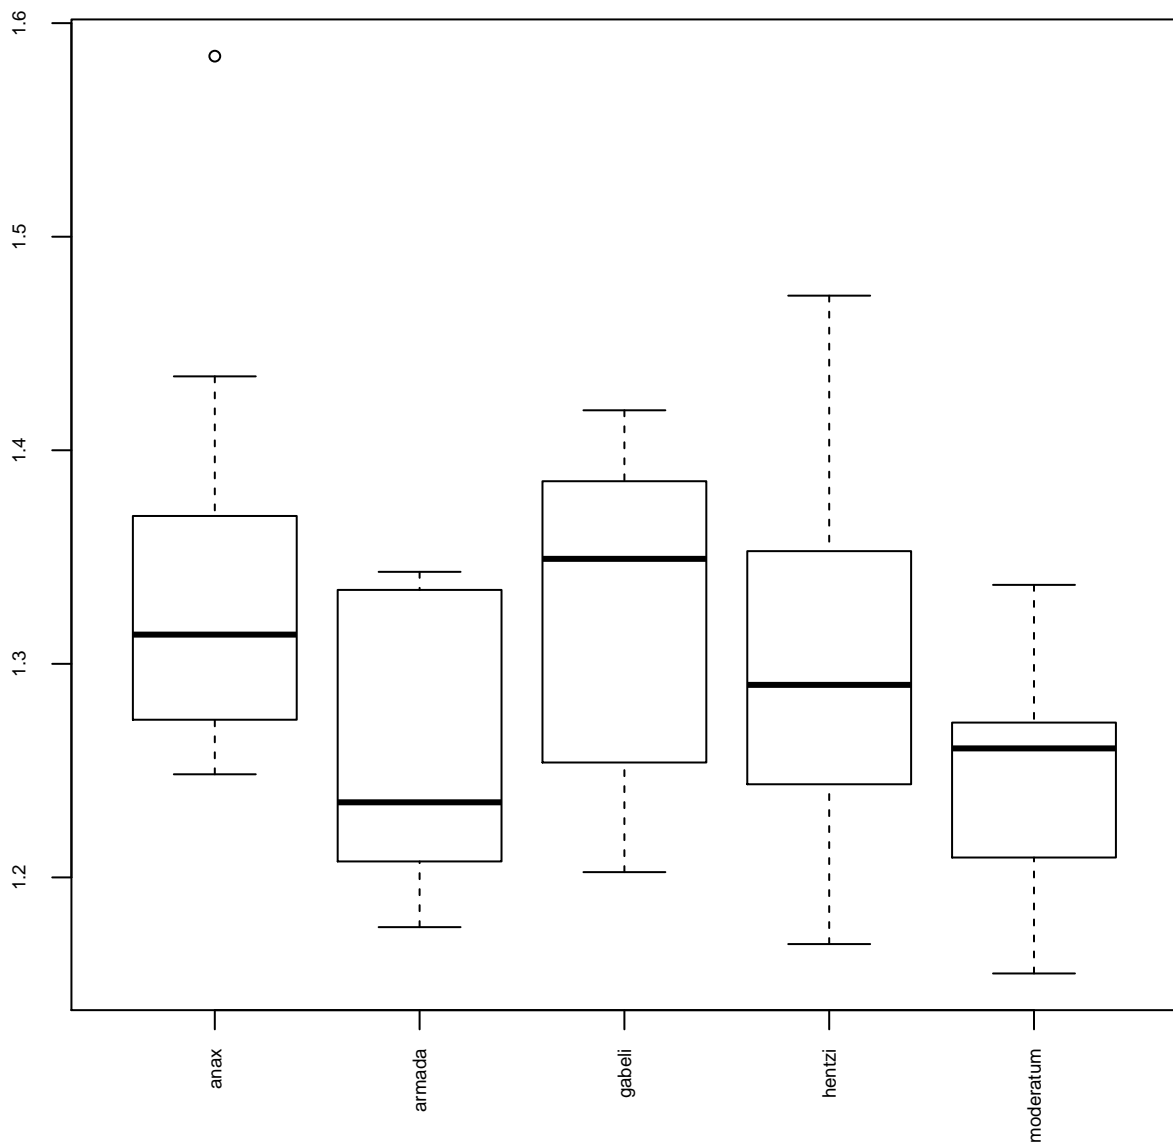

Supplement: Supplementary file 508

## Carapace Length/Tibia 4 ratio – males

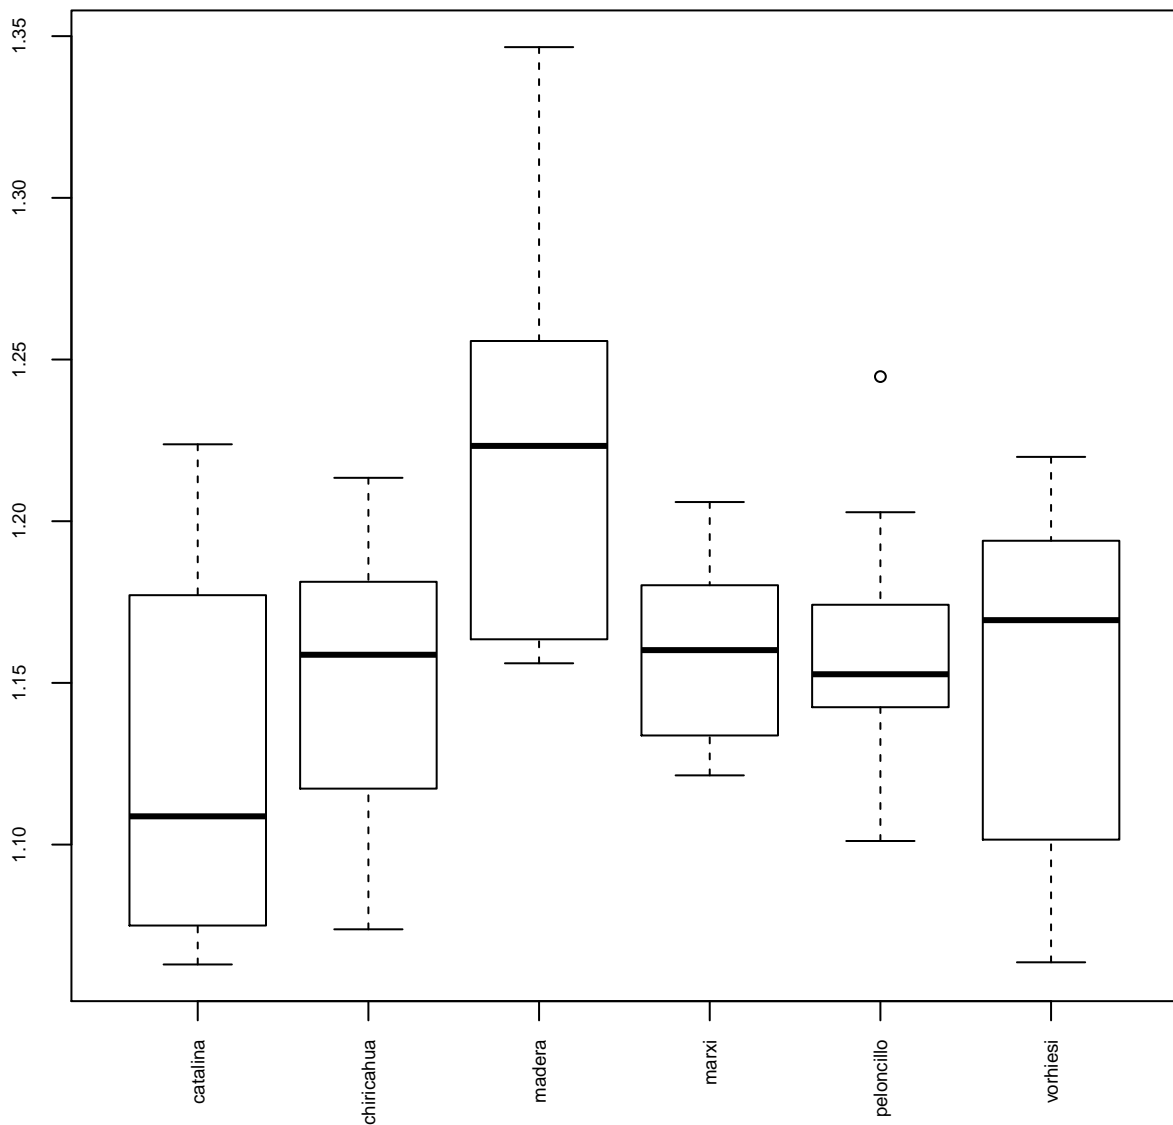

Supplement: Supplementary file 509

## Metatarsus 1/Femur 4 Length ratio – males

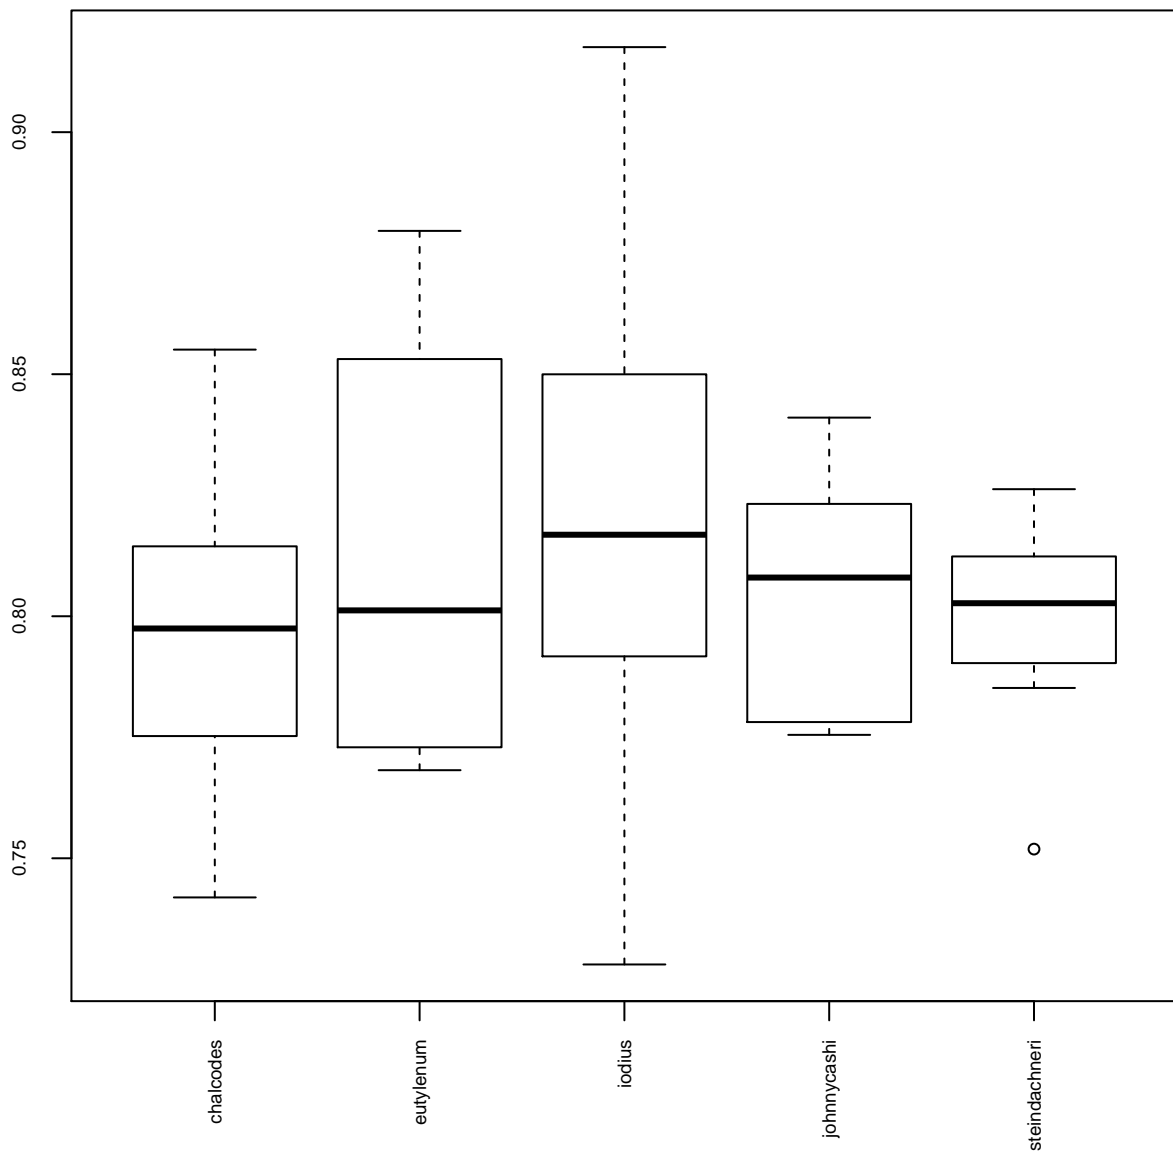

Supplement: Supplementary file 510

# Patella 1/Metatarsus 3 Length ratio – females

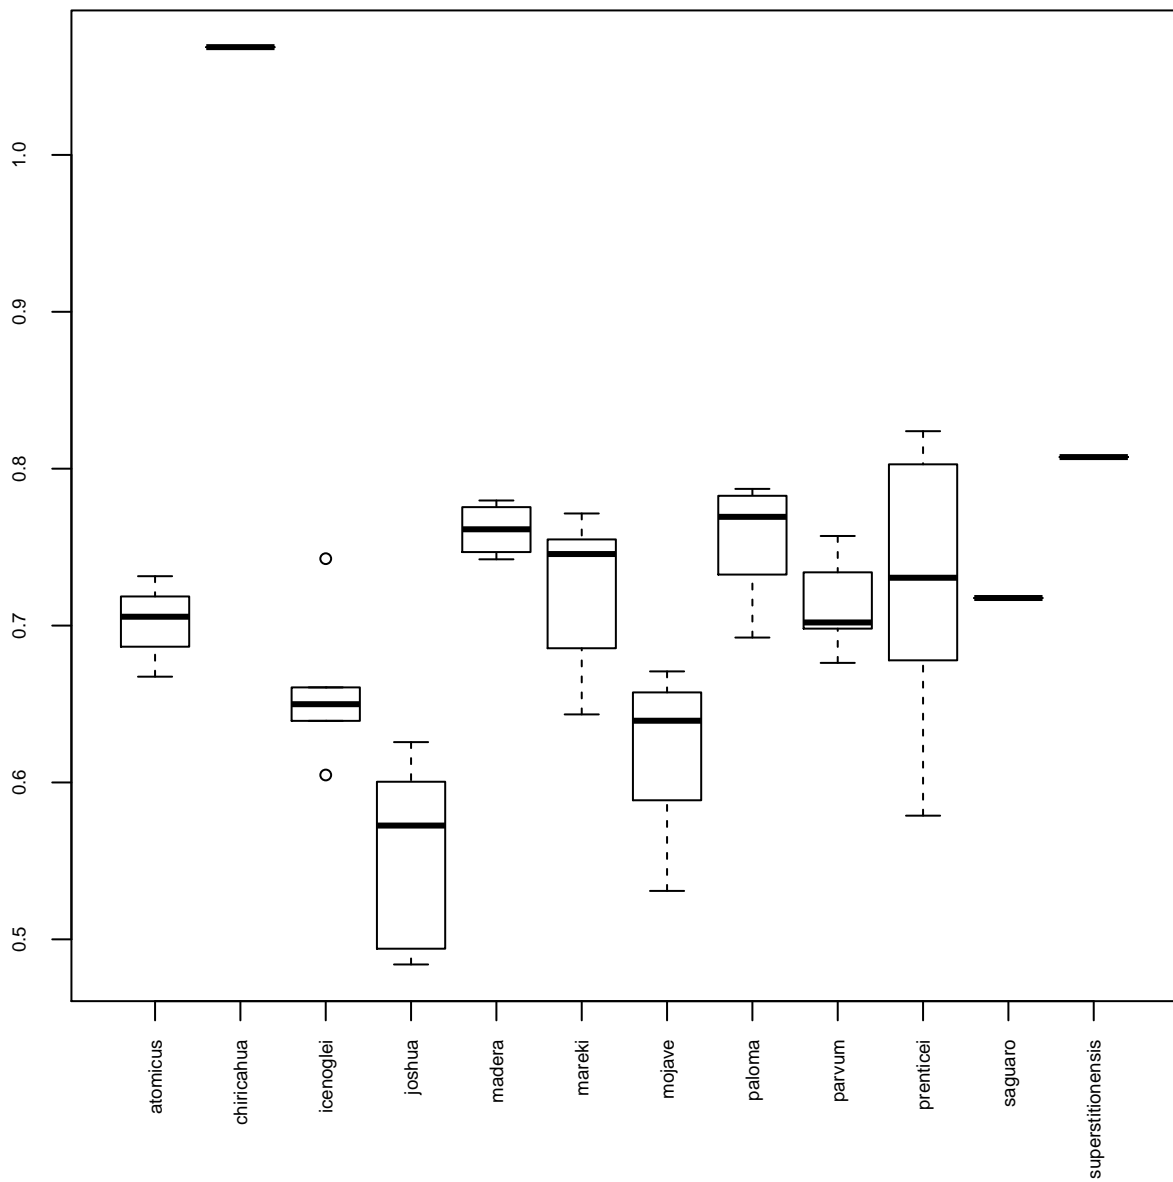

Supplement: Supplementary file 511

## Patella 1/Tarsus 3 Length ratio – males

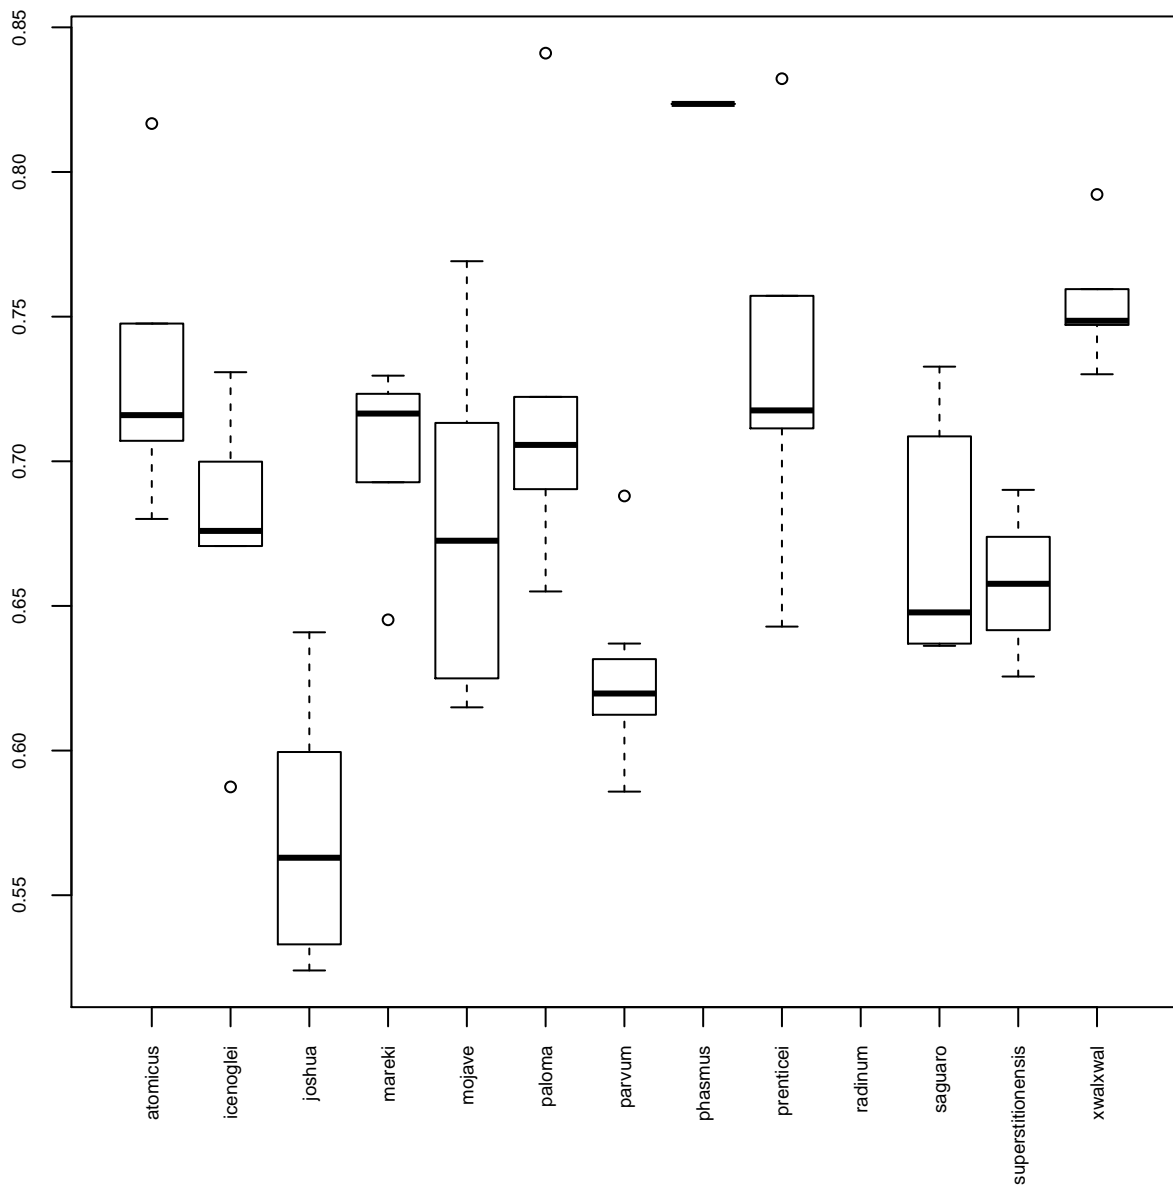

Supplement: Supplementary file 512

## Patella 3/Femur 4 Length ratio – males

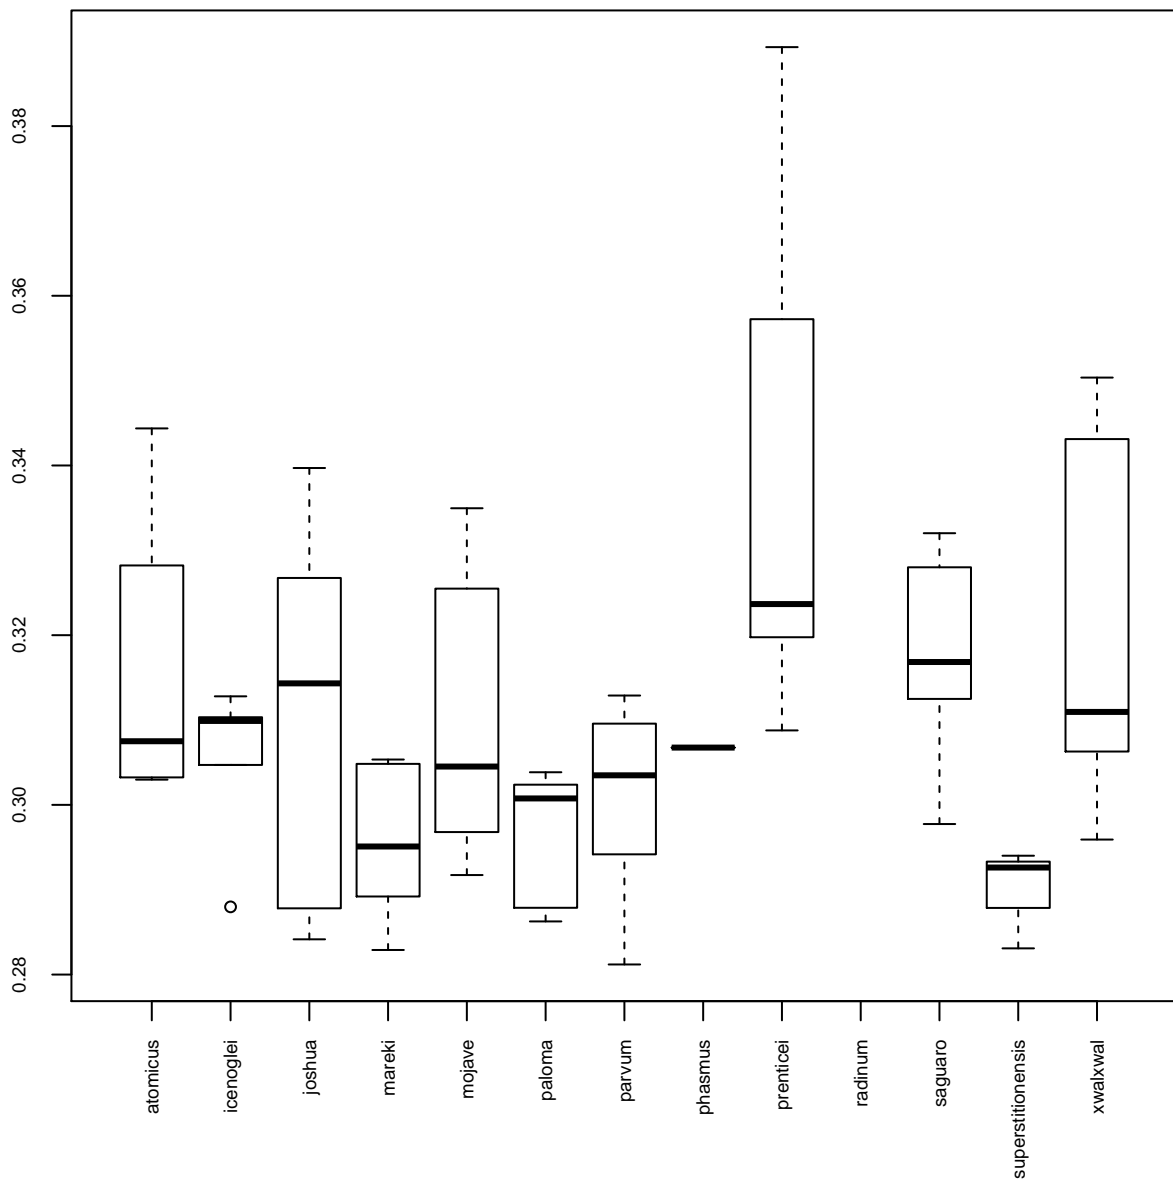

Supplement: Supplementary file 513

## Tarsus 1/Tarsus 3 ratio – males

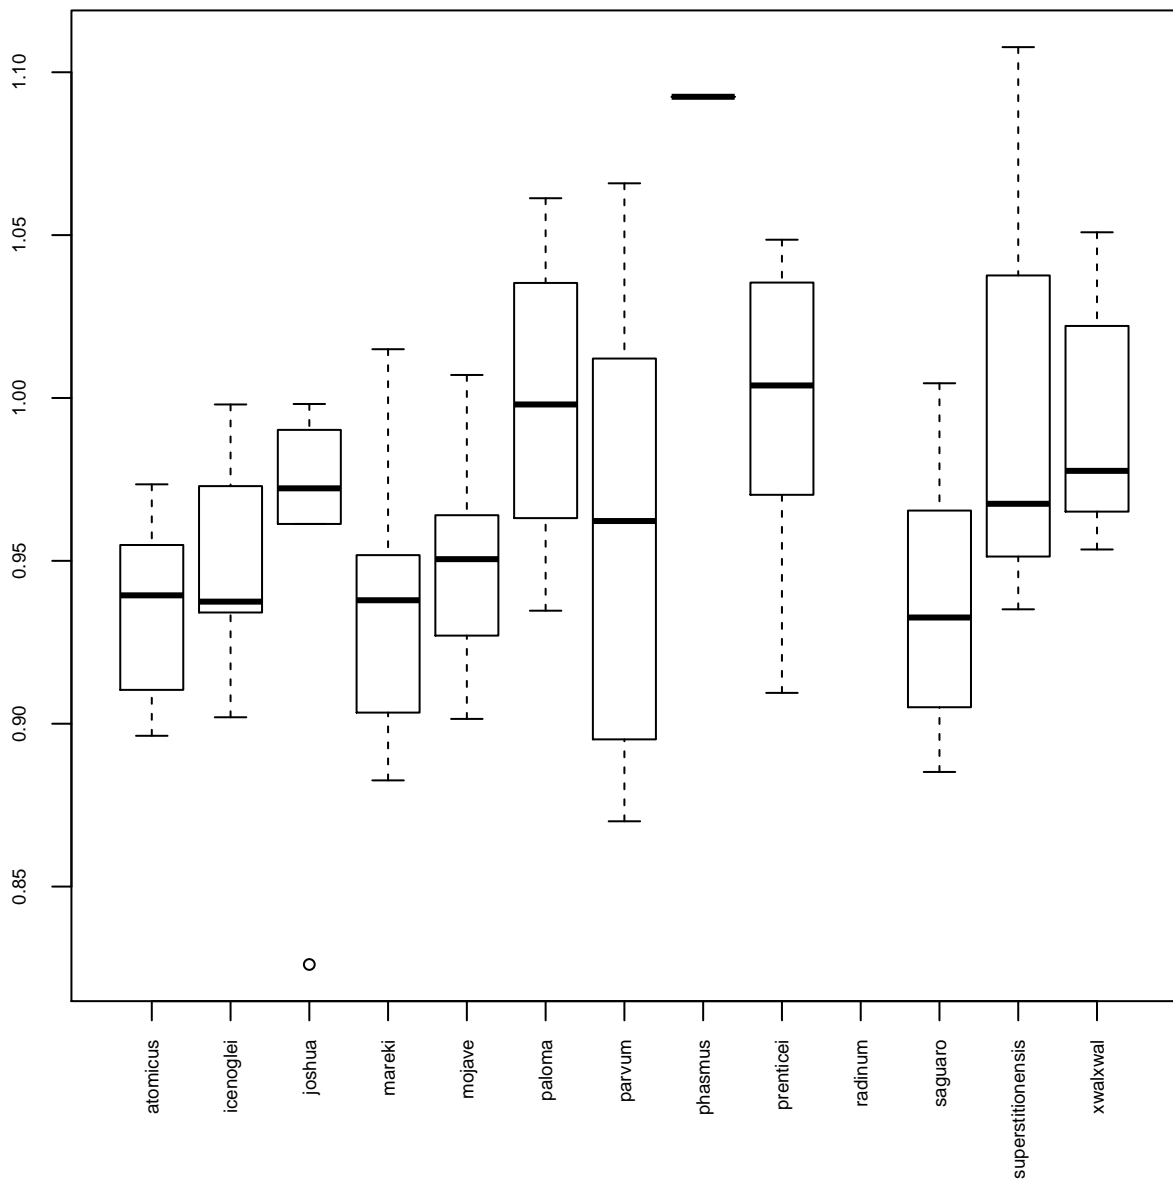

Supplement: Supplementary file 514

## Tarsus 1/Tibia 3 Length ratio – females

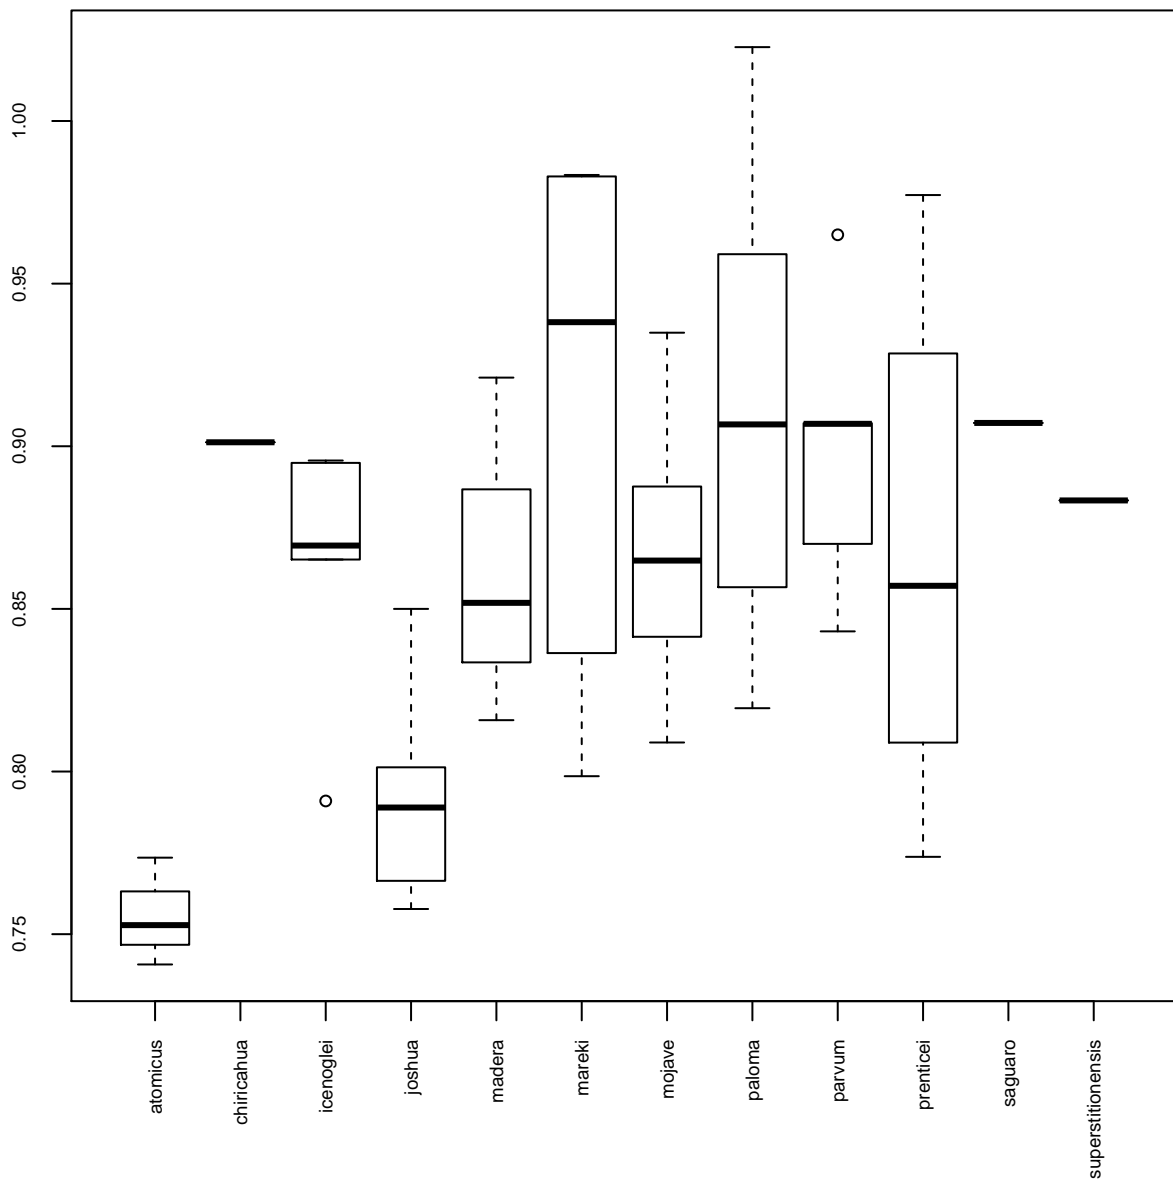

Supplement: Supplementary file 515

# Tarsus 3/Tarsus 4 ratio – females

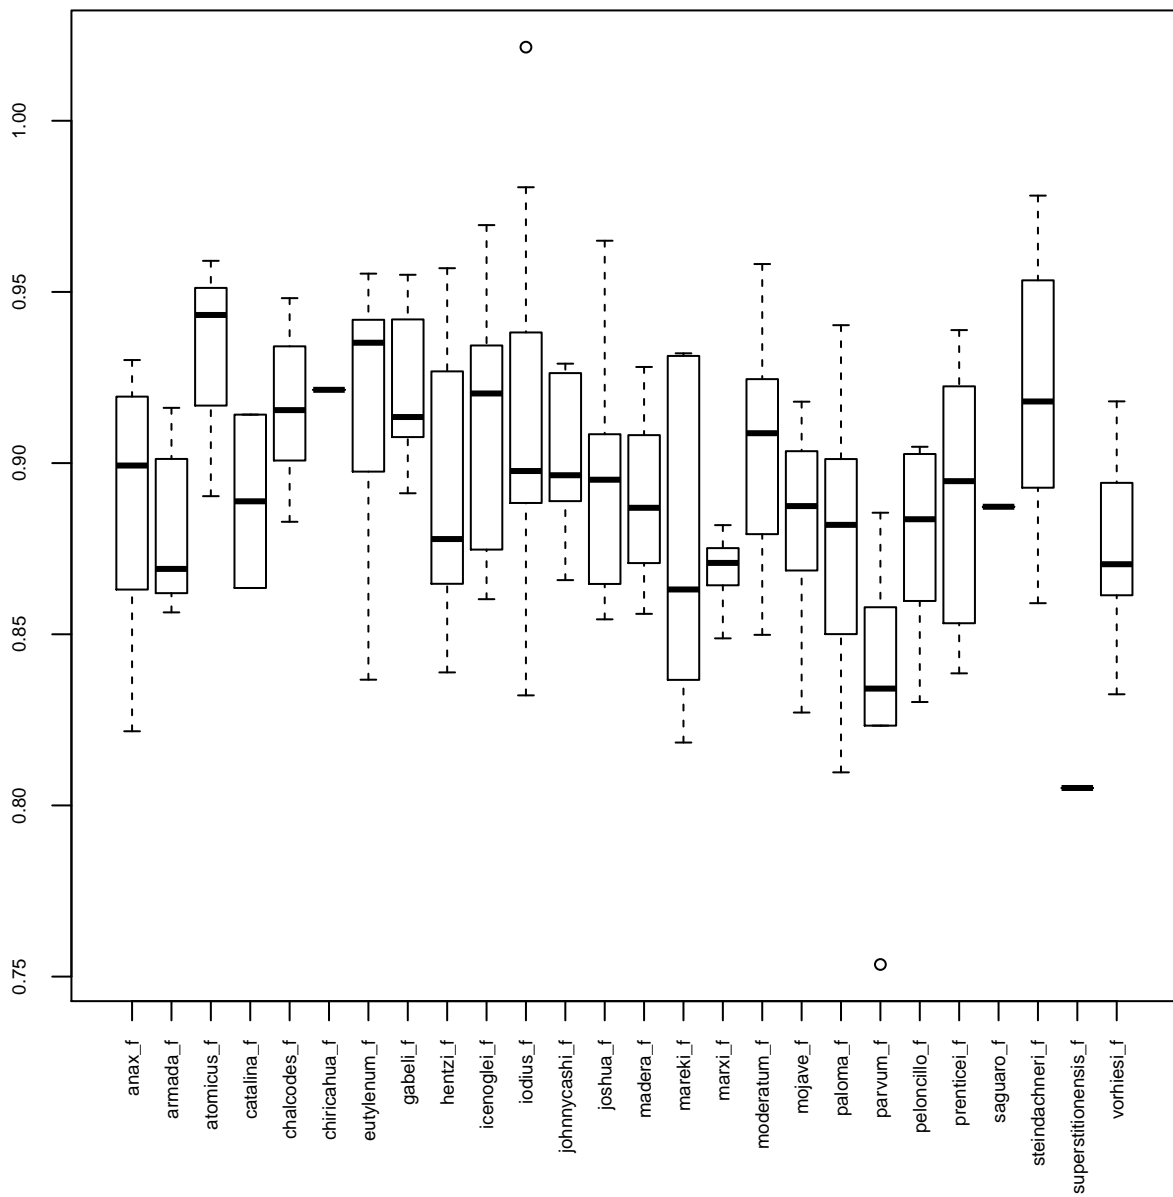

Supplement: Supplementary file 516

## Patella 4/Tarsus 4 ratio – females

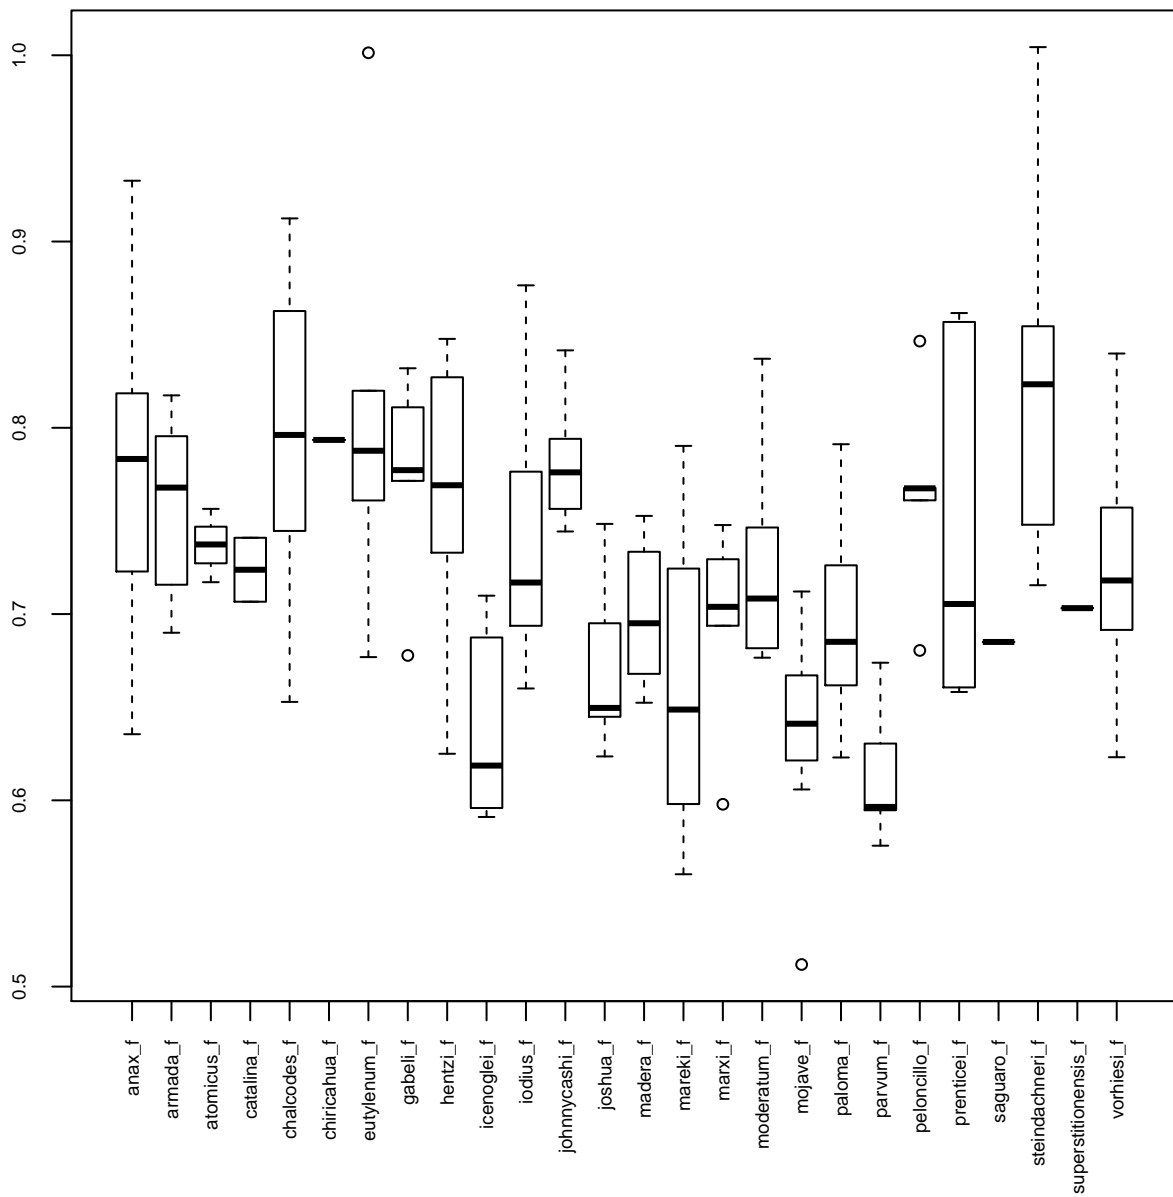

Supplement: Supplementary file 517

# Patella 4/Tarsus 4 ratio – females

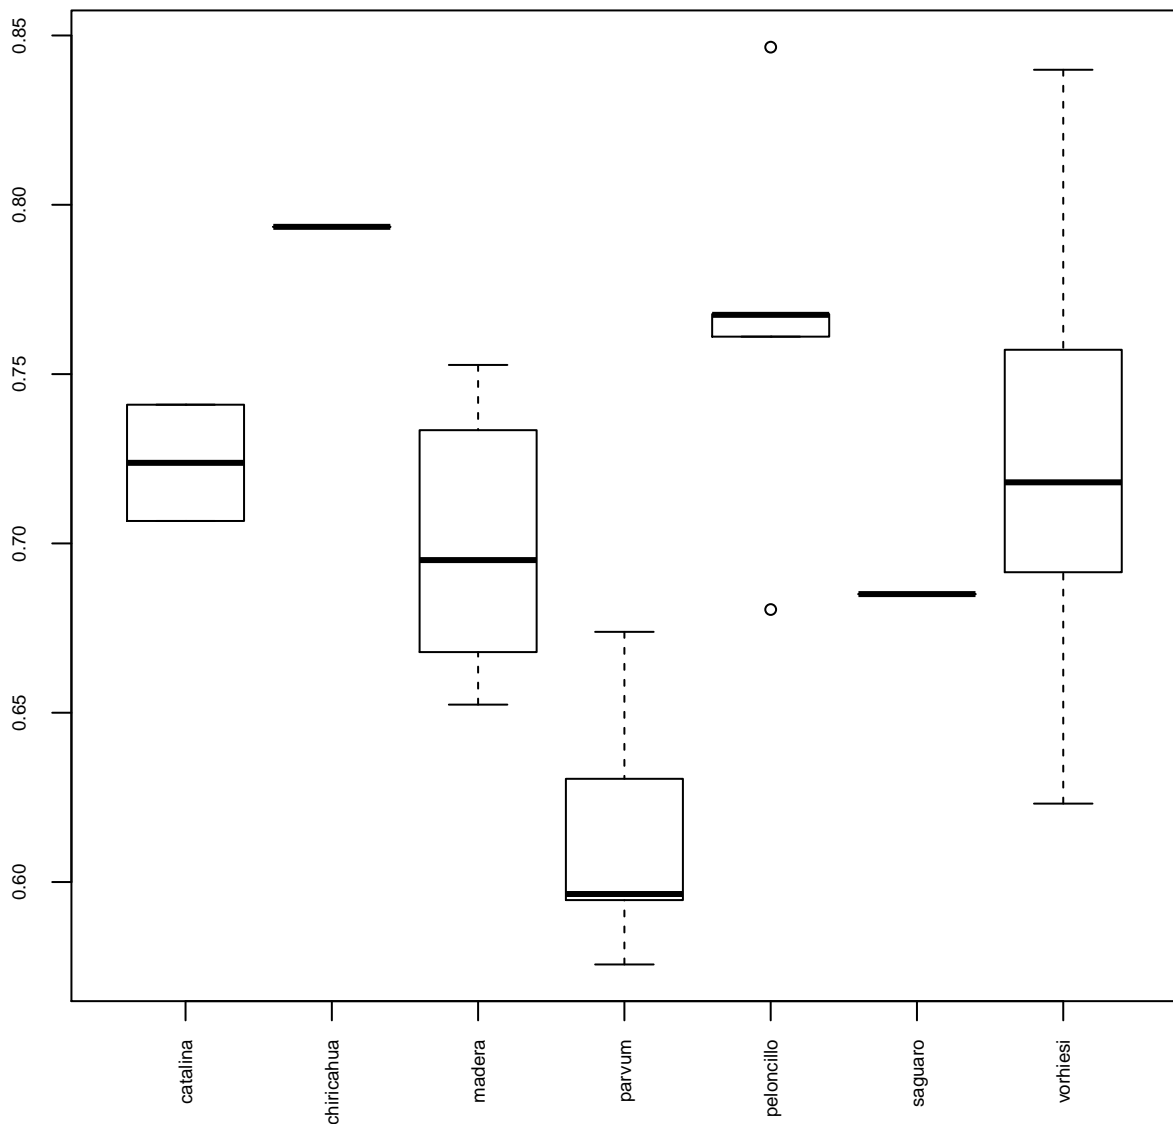

Supplement: Supplementary file 518

## Patella 1/Metatarsus 4 Length ratio – females

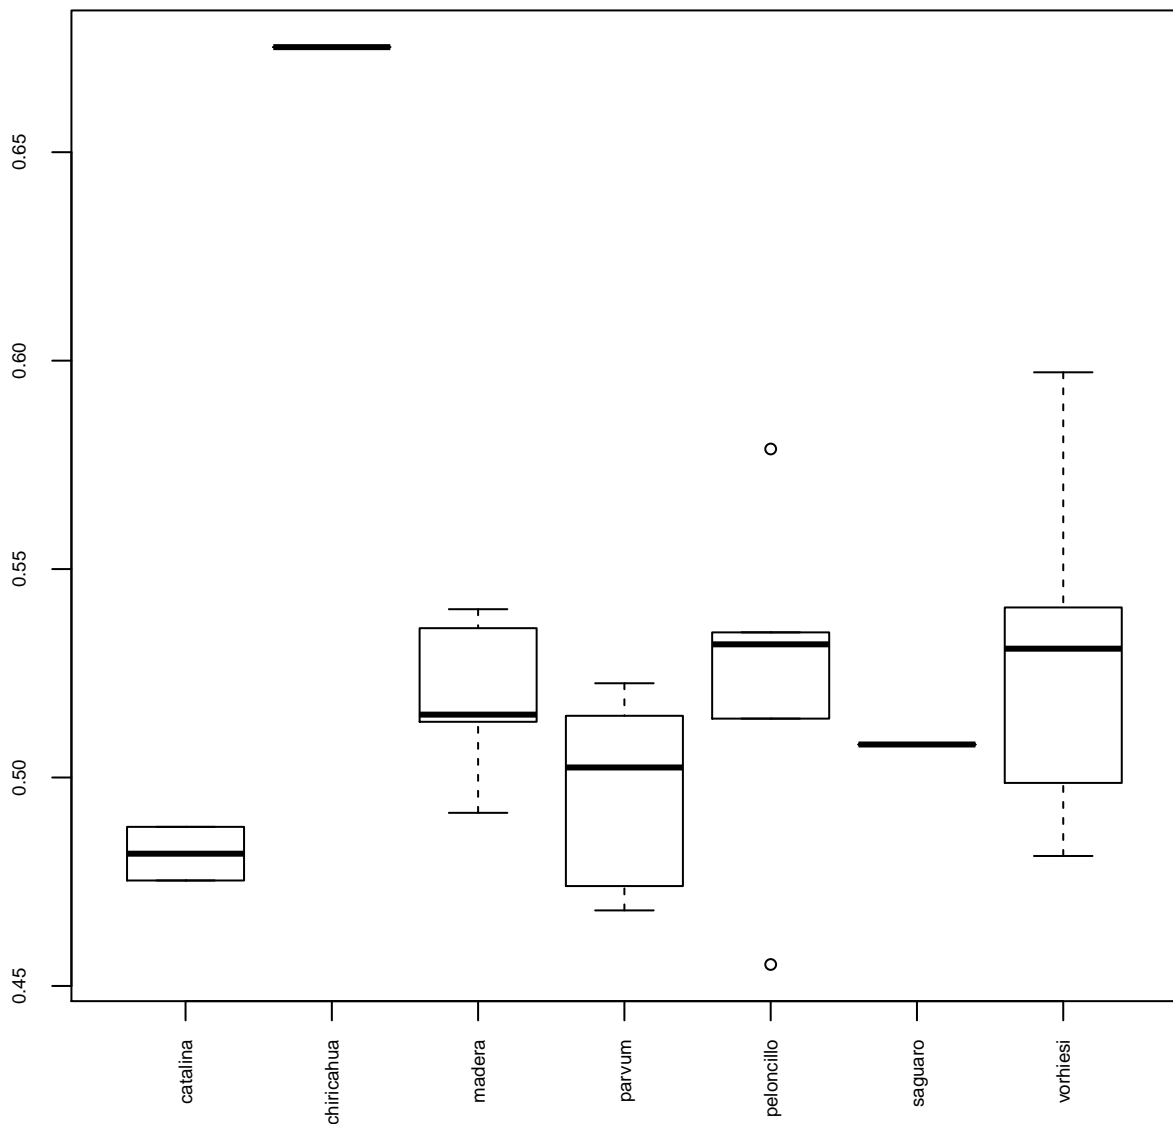

Supplement: Supplementary file 519

## Tibia 1/Metatarsus 1 ratio – females

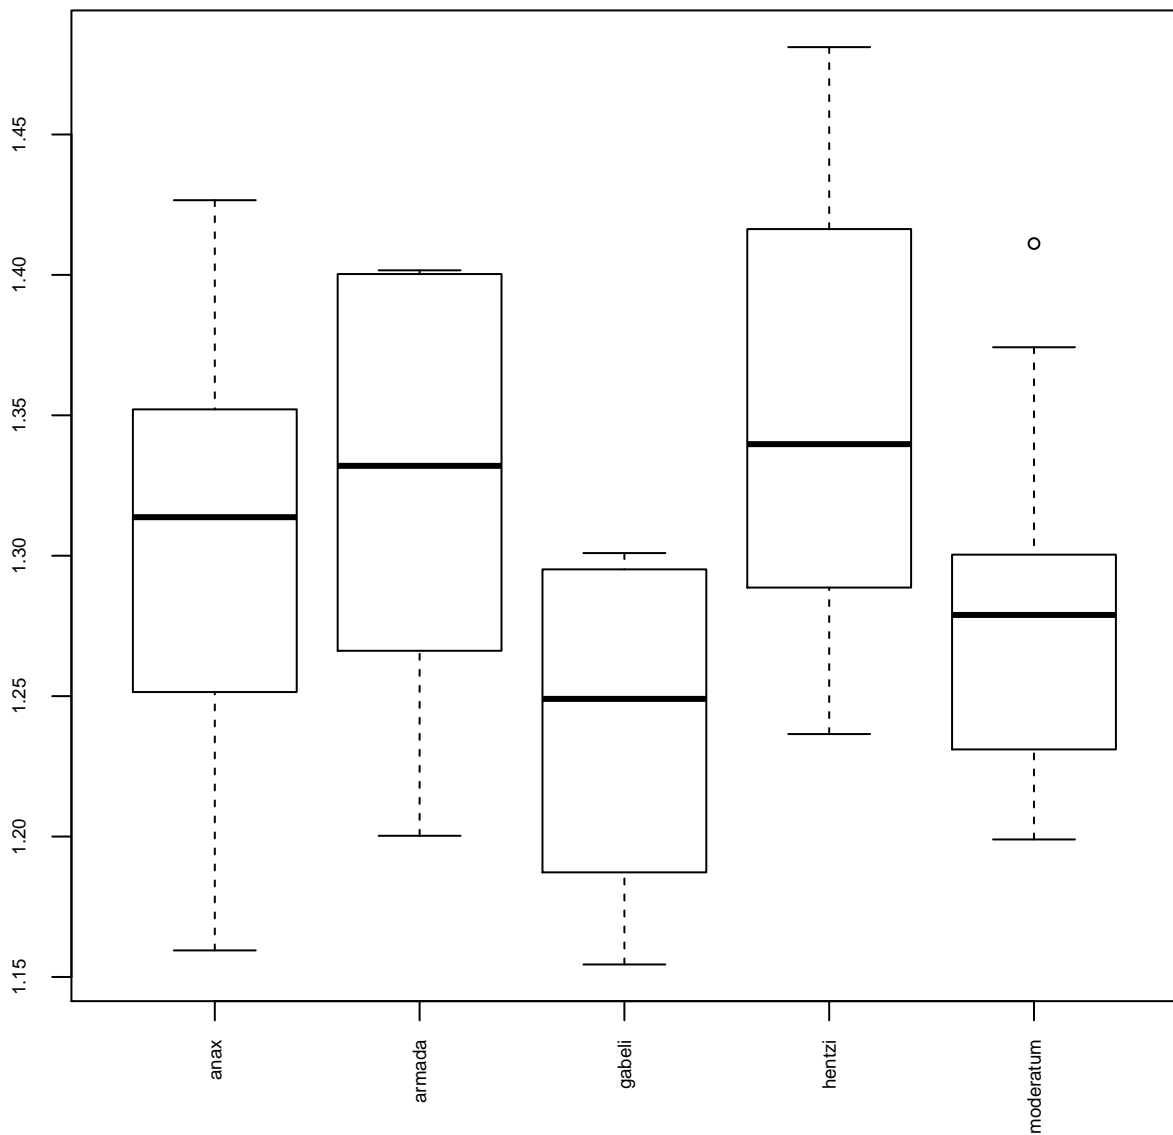

Supplement: Supplementary file 520

## Patella 4/Metatarsus 4 ratio – females

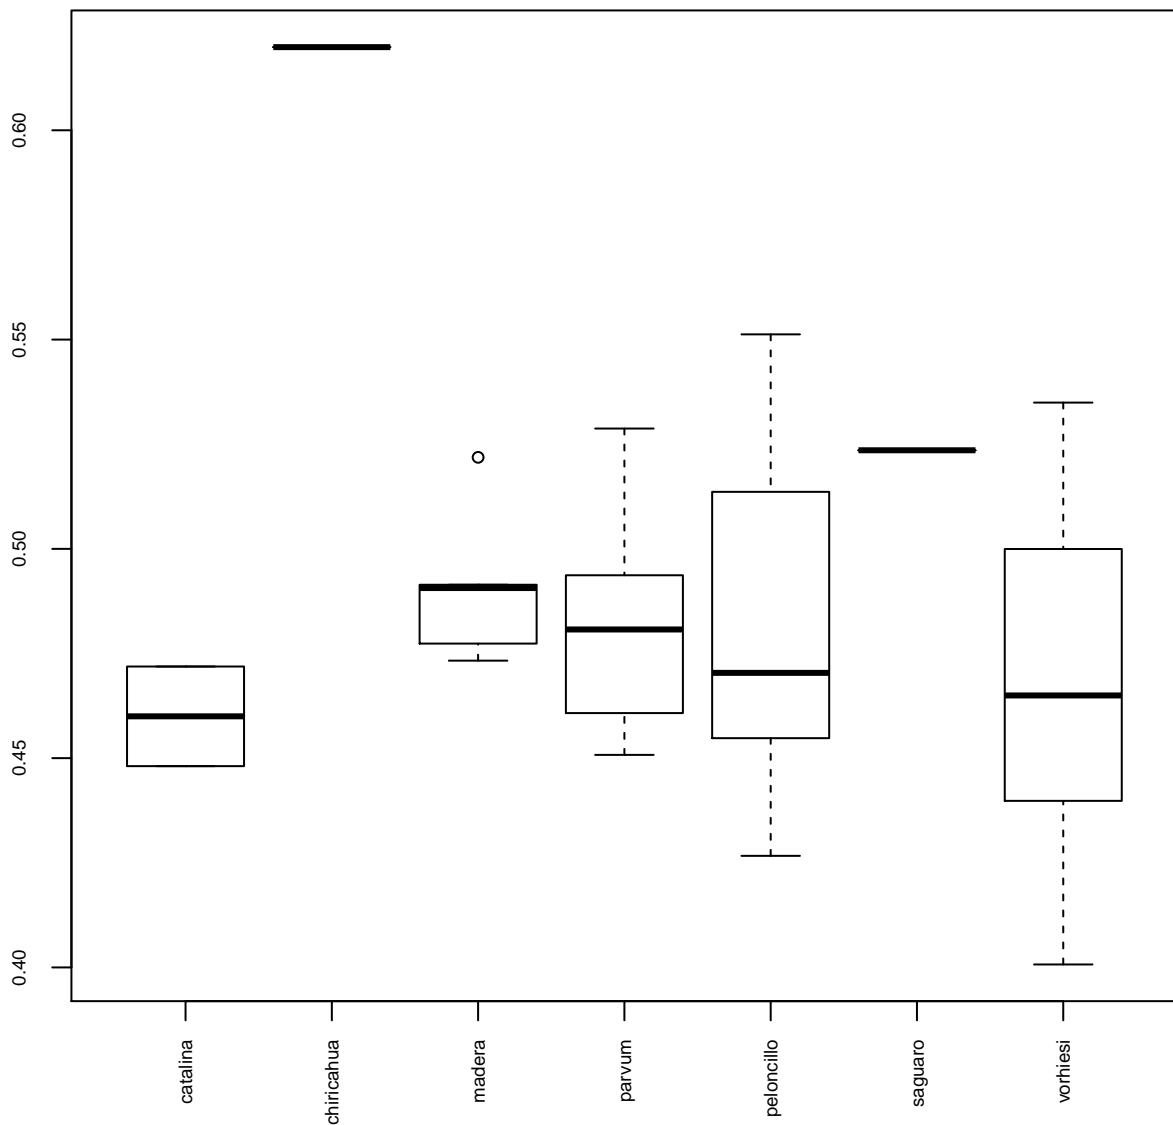

Supplement: Supplementary file 521

## Femur 4/Metatarsus 4 ratio – females

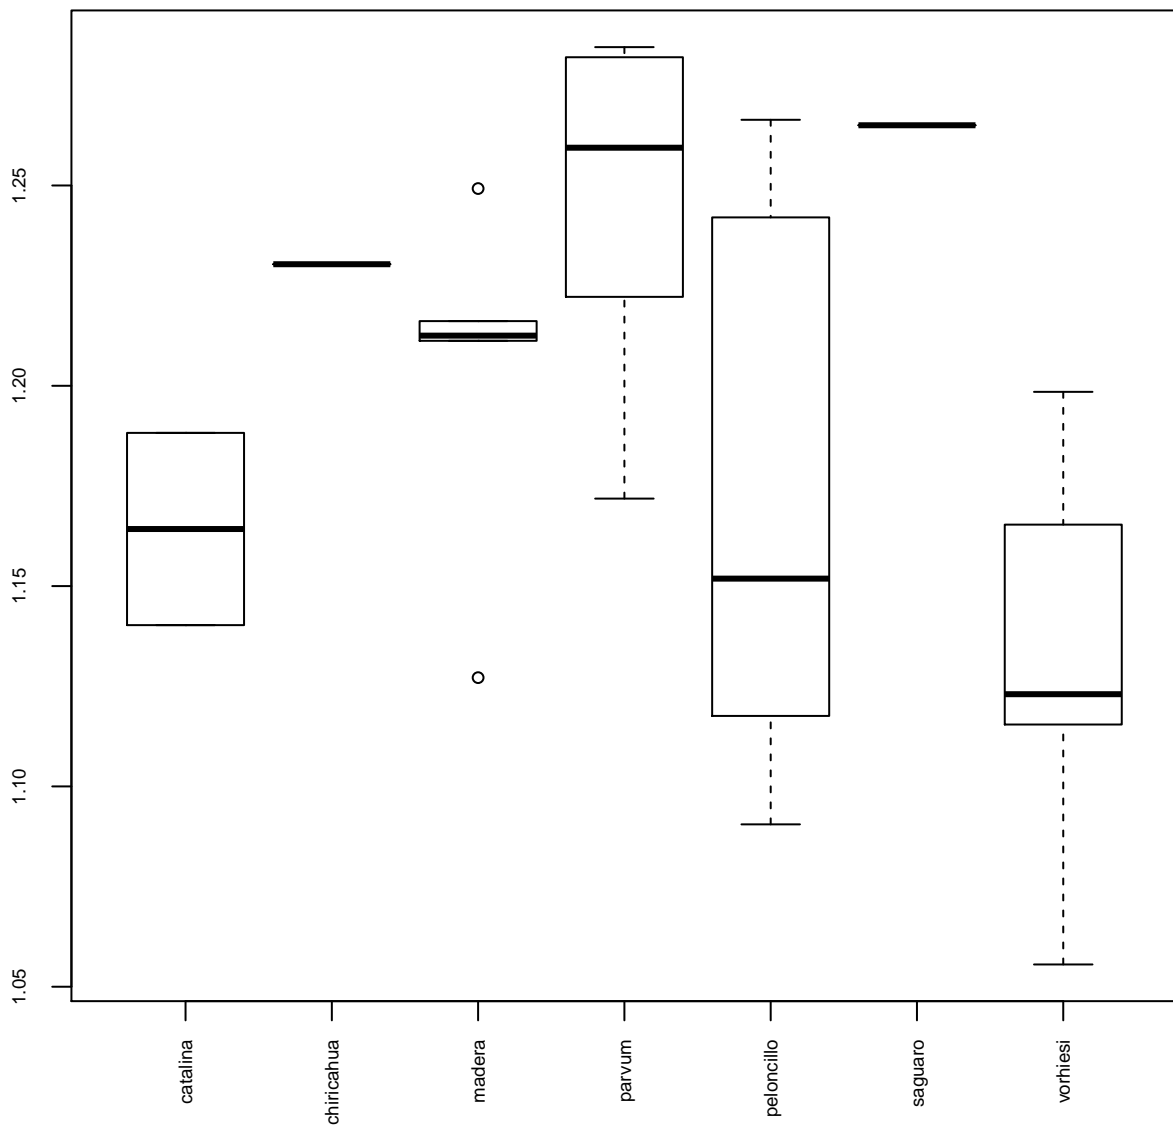

Supplement: Supplementary file 522

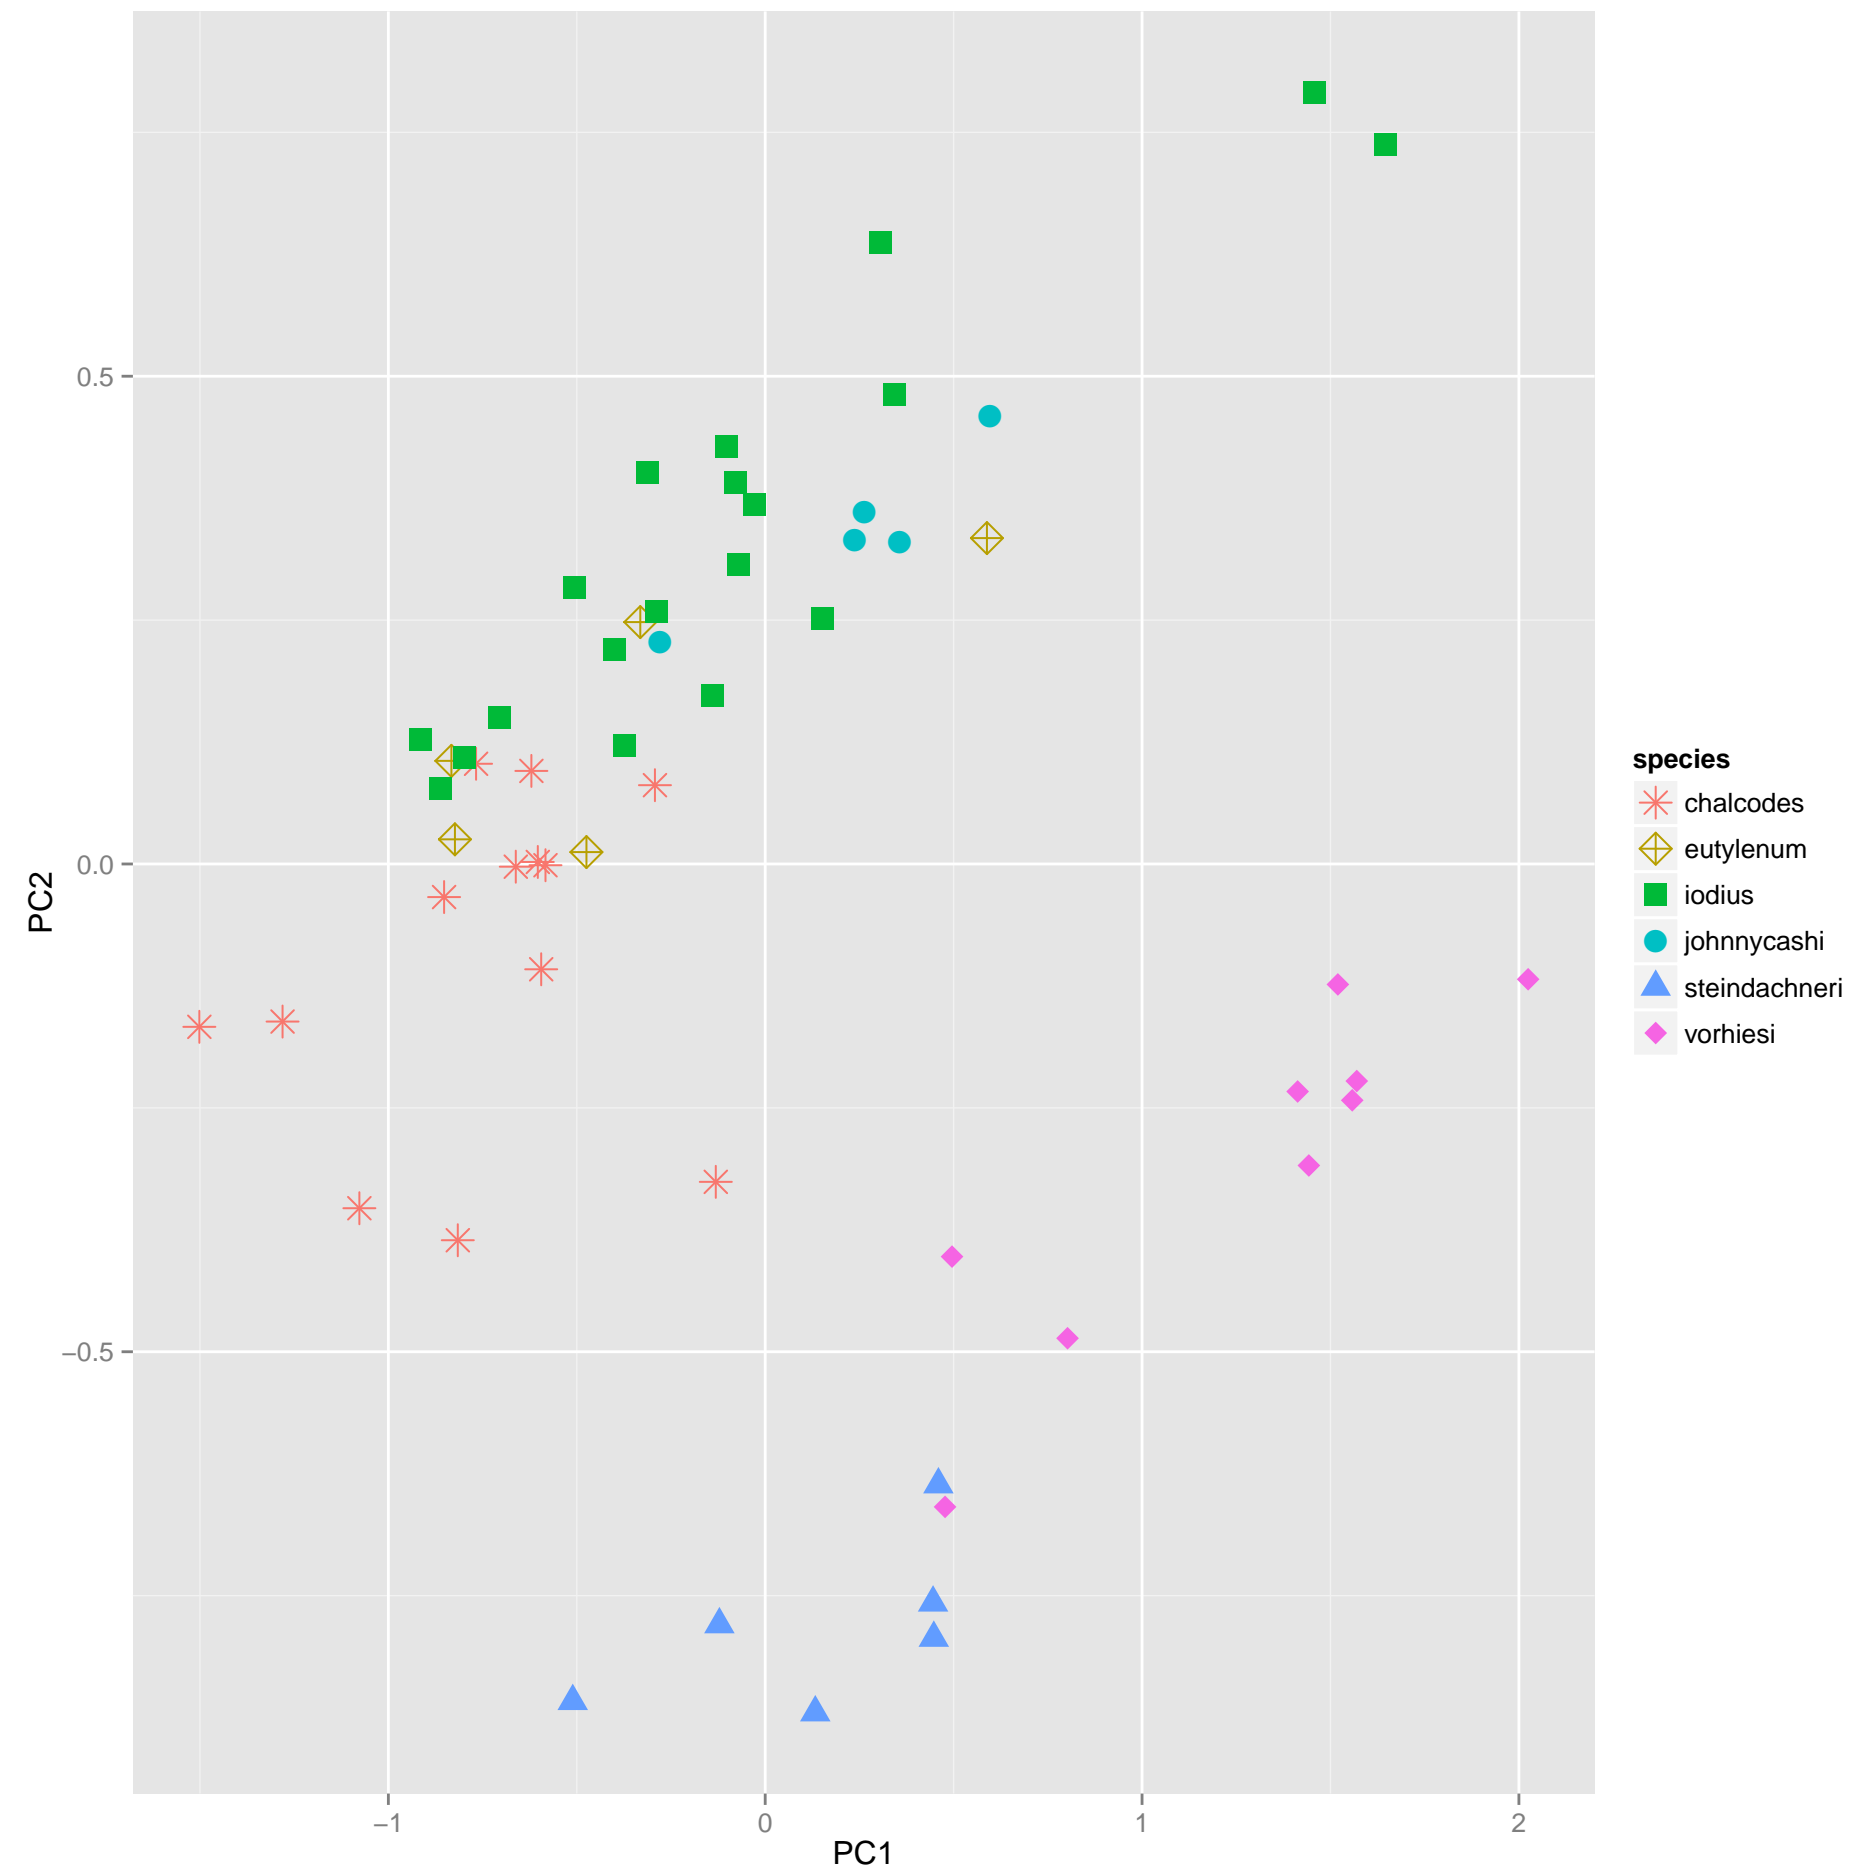

Supplement: Supplementary file 523

## Femur 3/Metatarsus 4 Length ratio – females

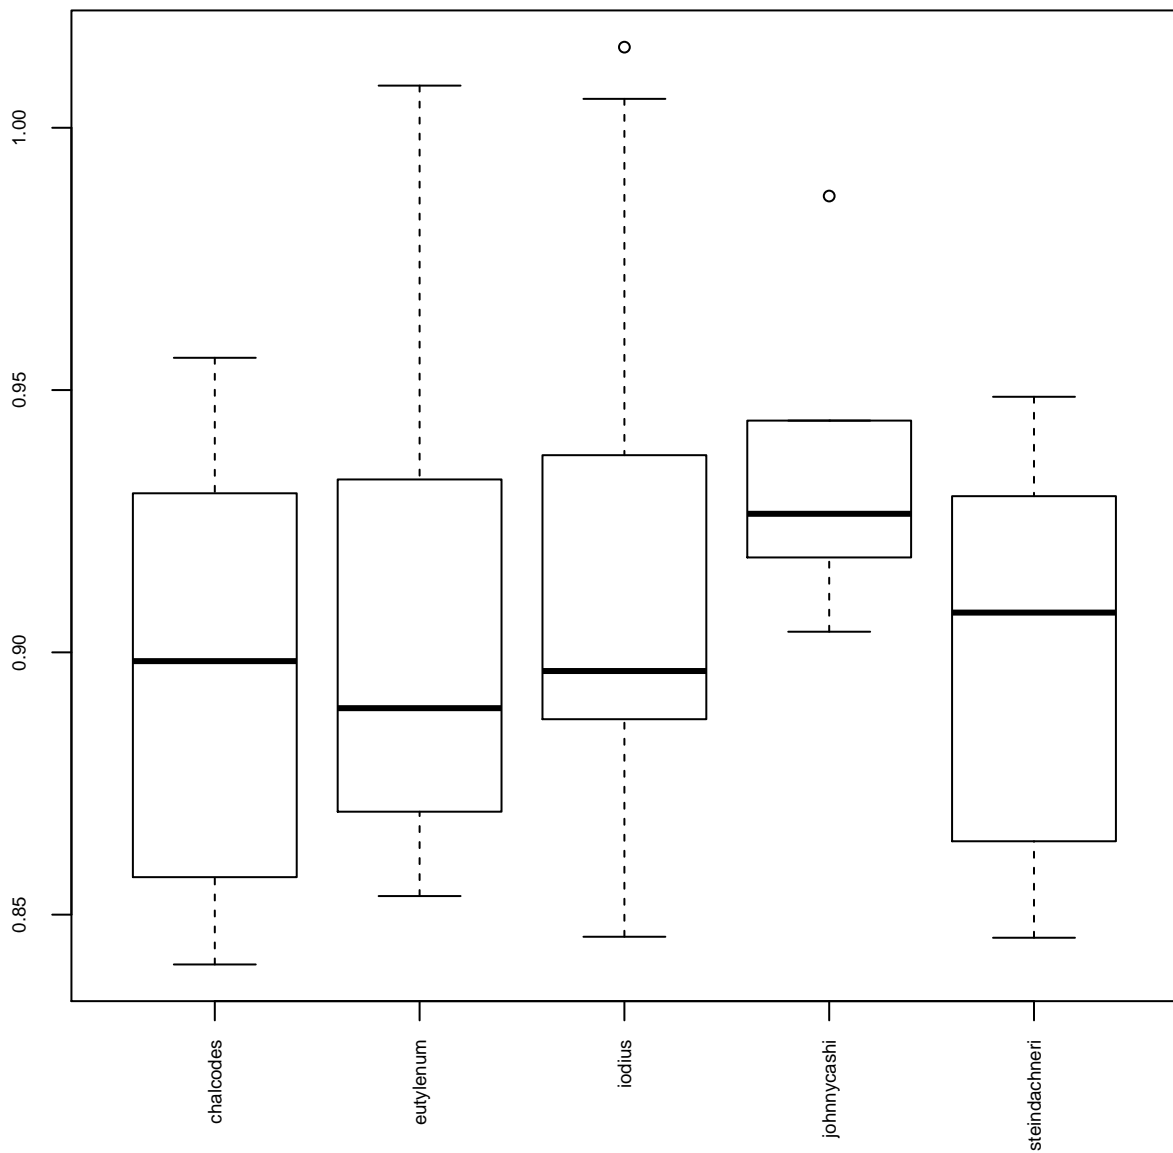

Supplement: Supplementary file 524

## Carapace Length/Tarsus 4 ratio – males

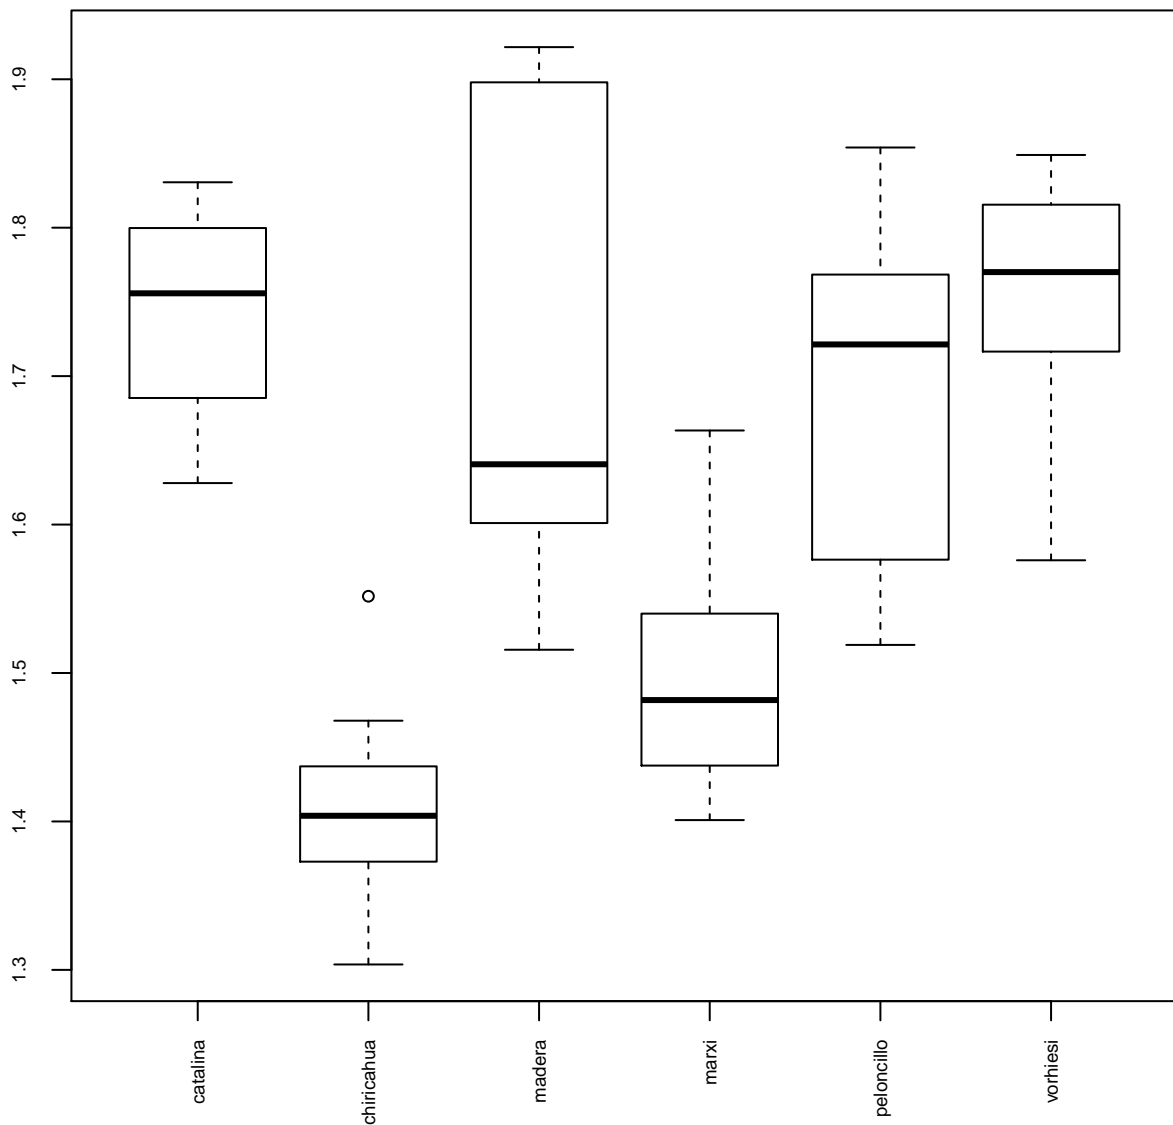

Supplement: Supplementary file 525

## Patella 1/Tarsus 1 ratio – males

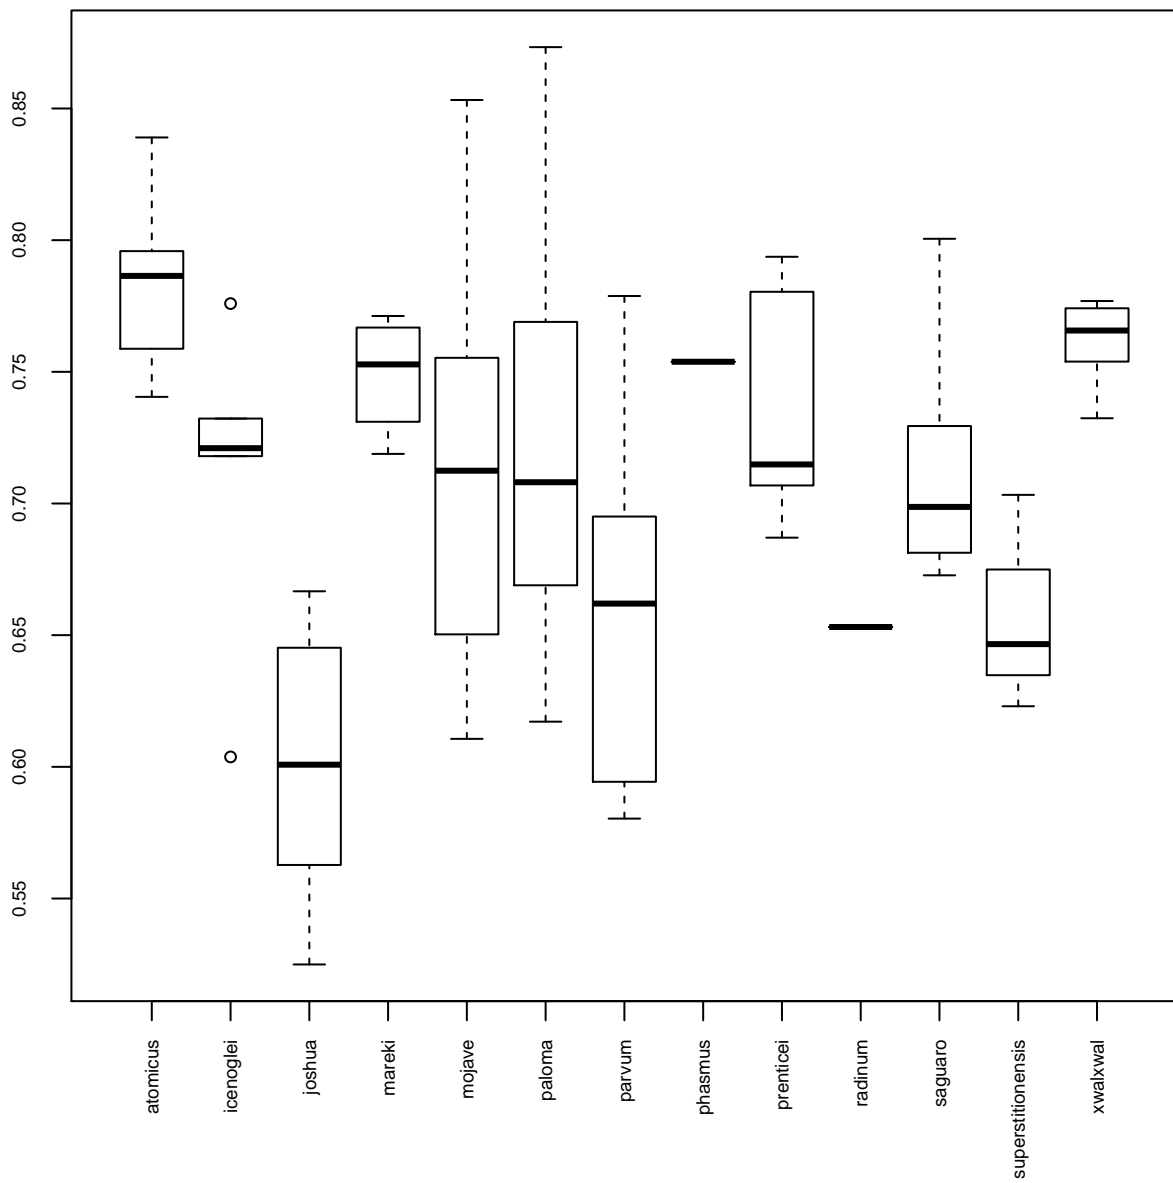

Supplement: Supplementary file 526

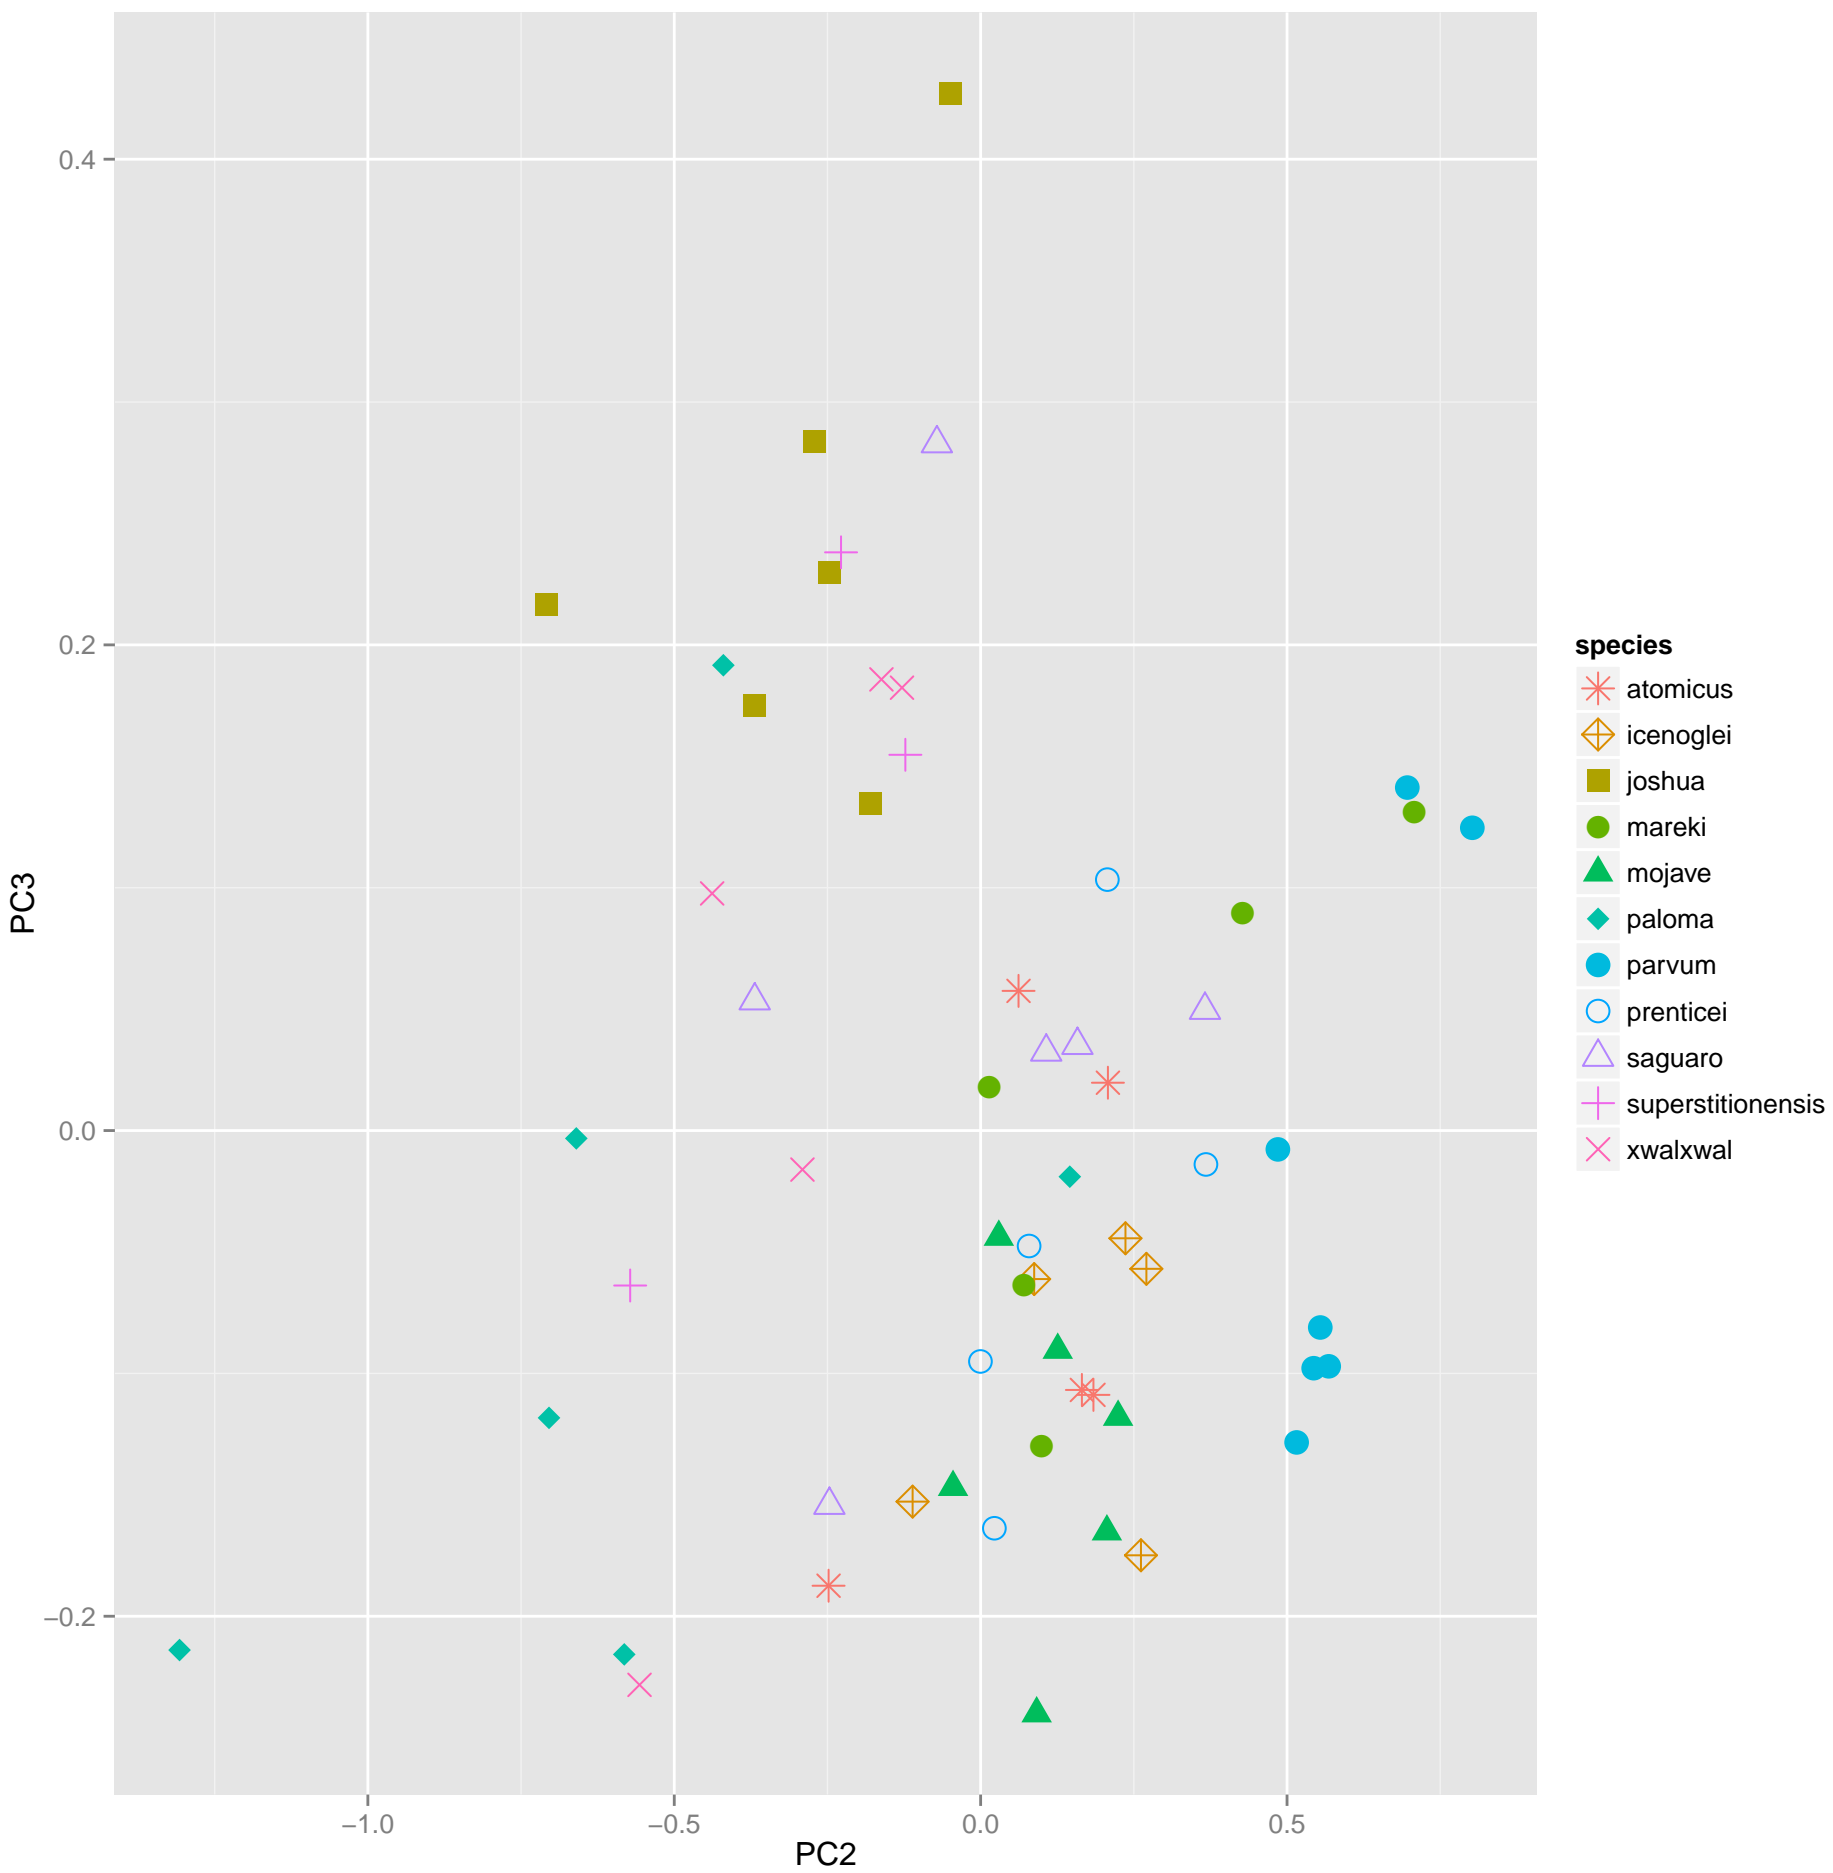

Supplement: Supplementary file 527

## Carapace Width – males

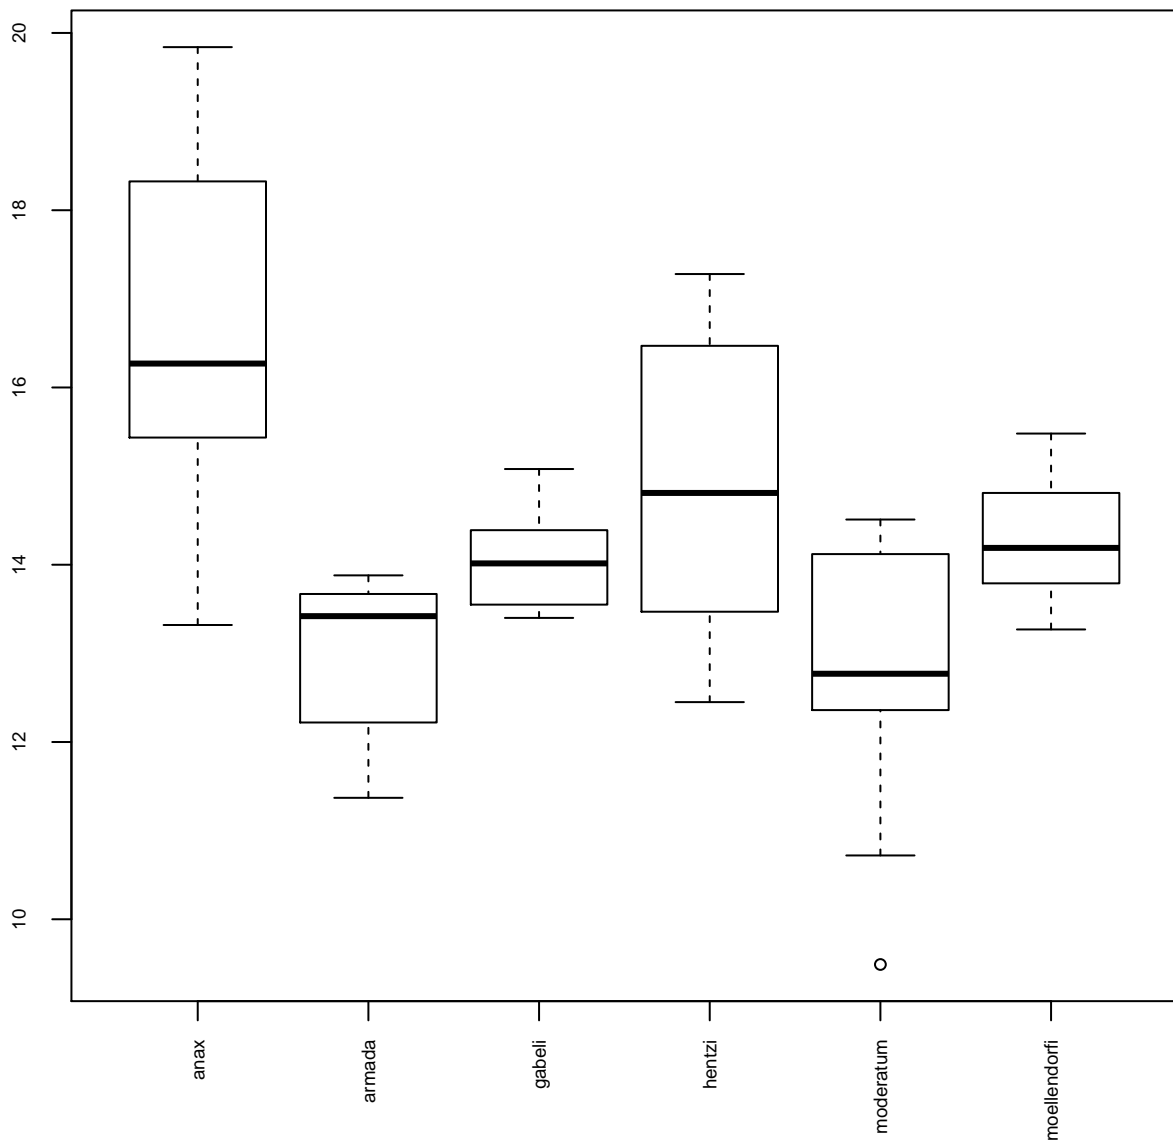

Supplement: Supplementary file 528

## Femur 4/Metatarsus 4 ratio – females

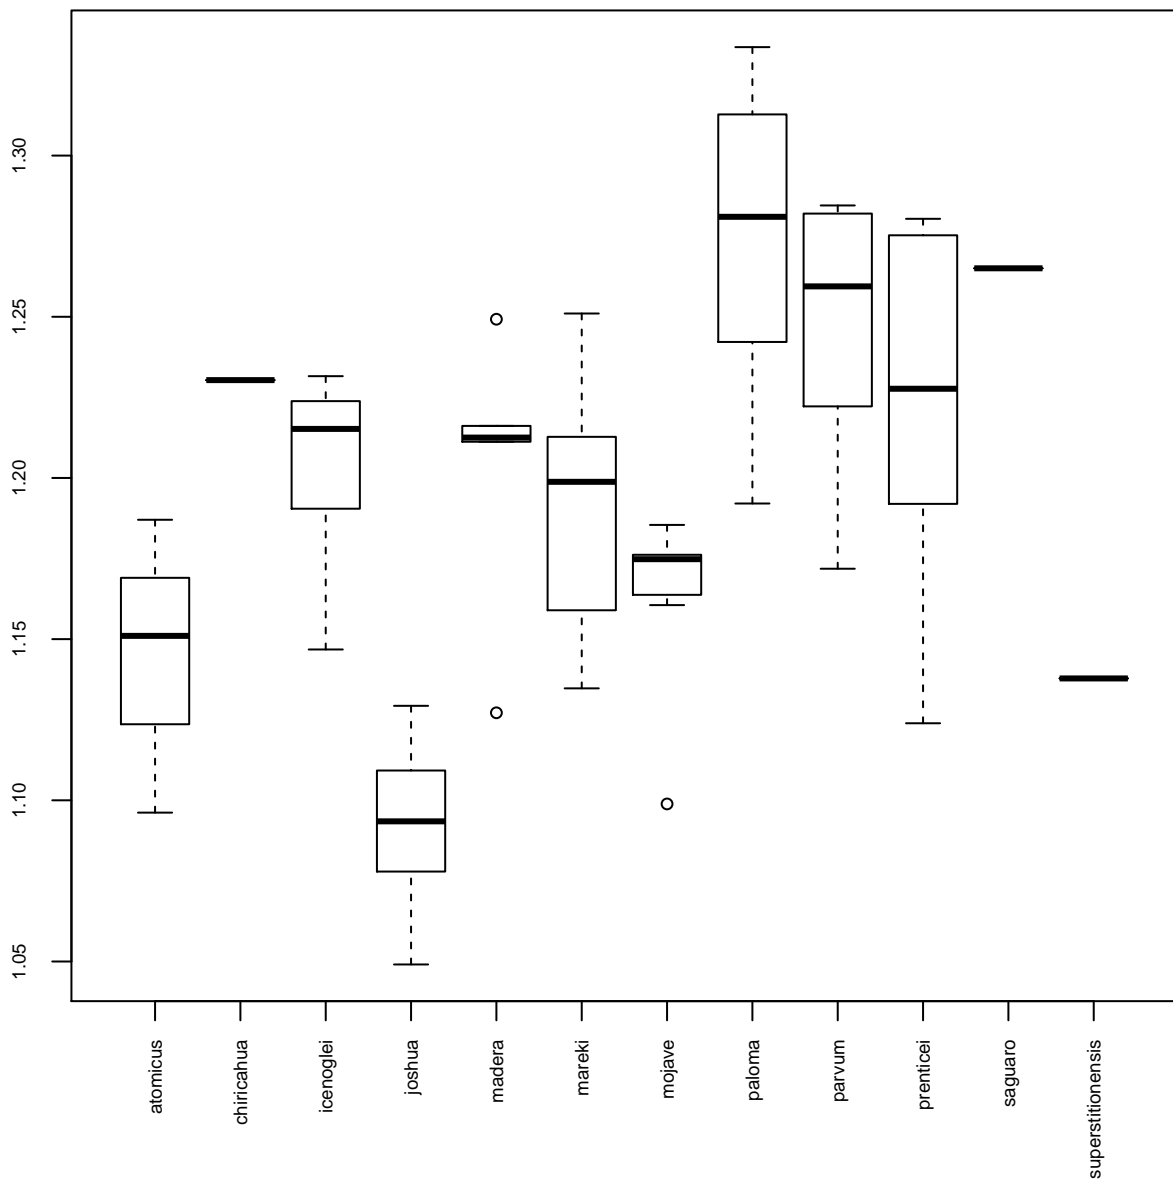

Supplement: Supplementary file 529

## Carapace Length/Metatarsus 3 ratio – males

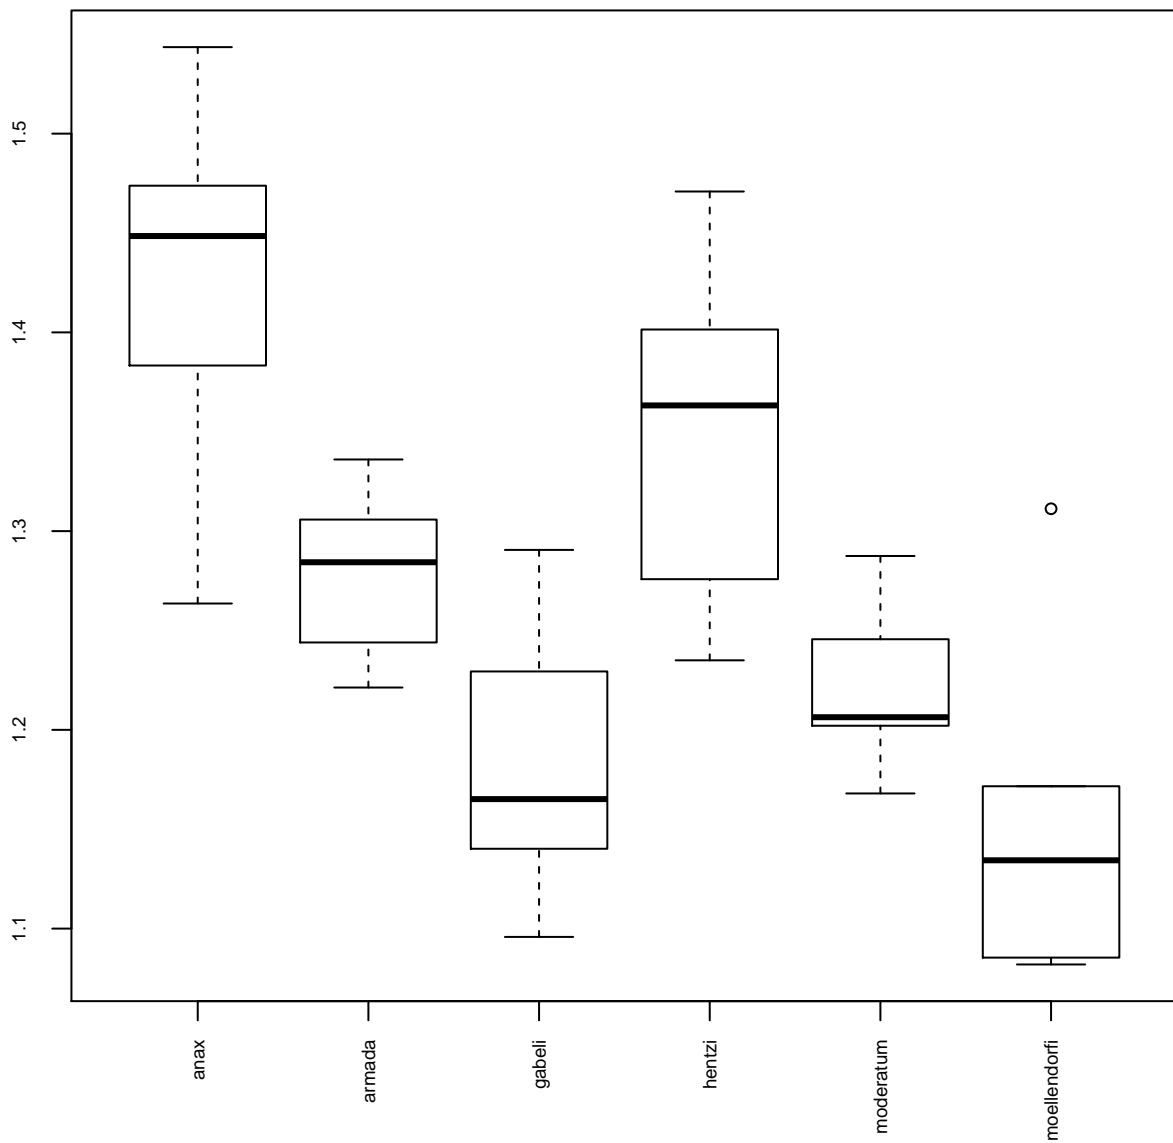

Supplement: Supplementary file 530

## Femur 1/Tibia 3 ratio – males

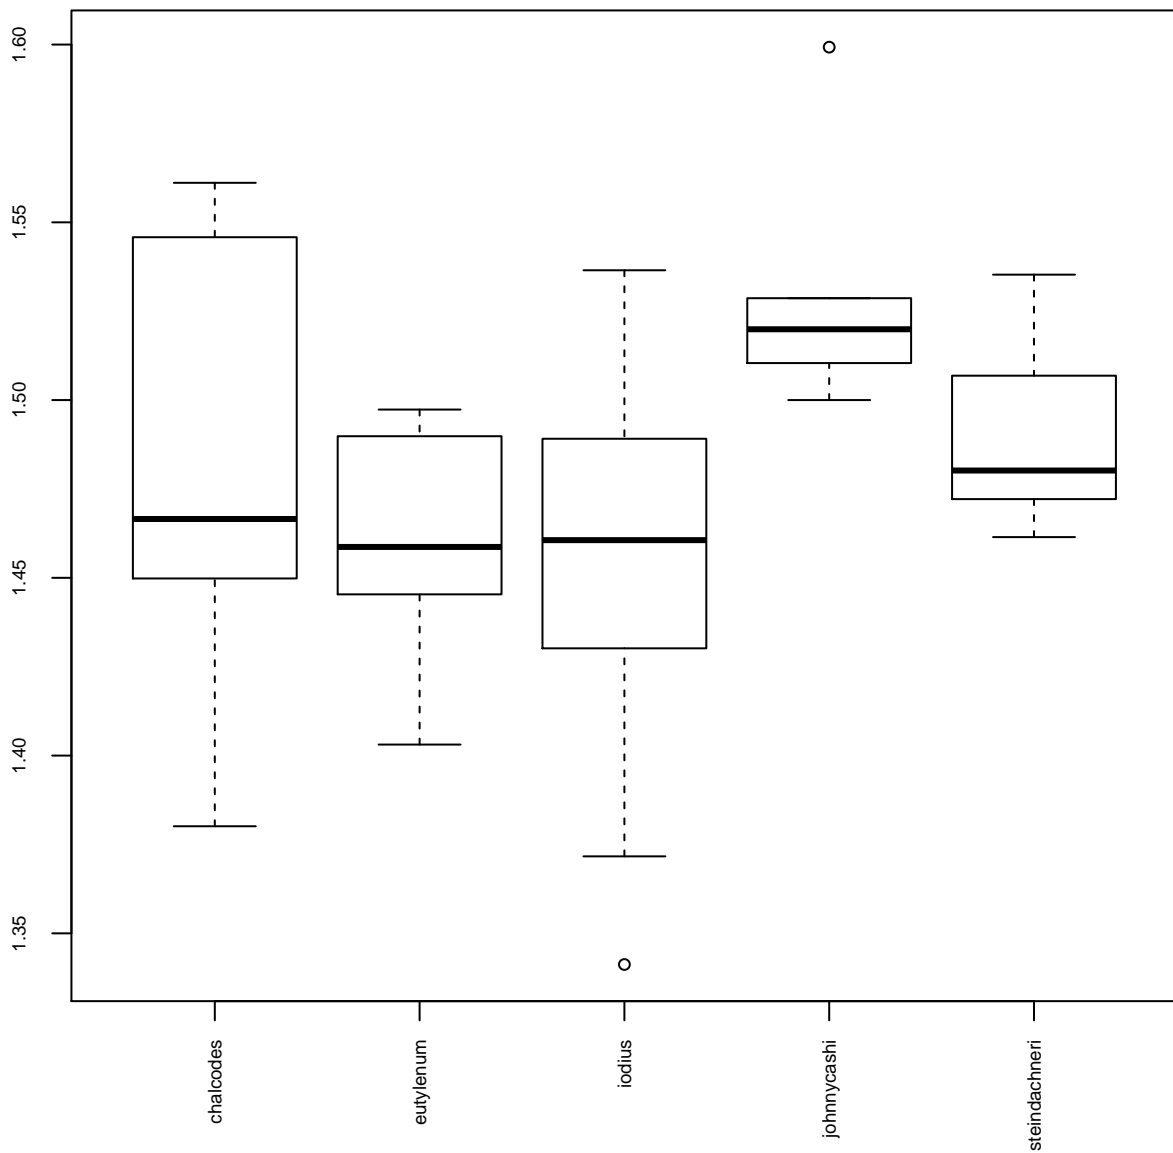

Supplement: Supplementary file 531

## Femur 1/Patella 3 ratio – males

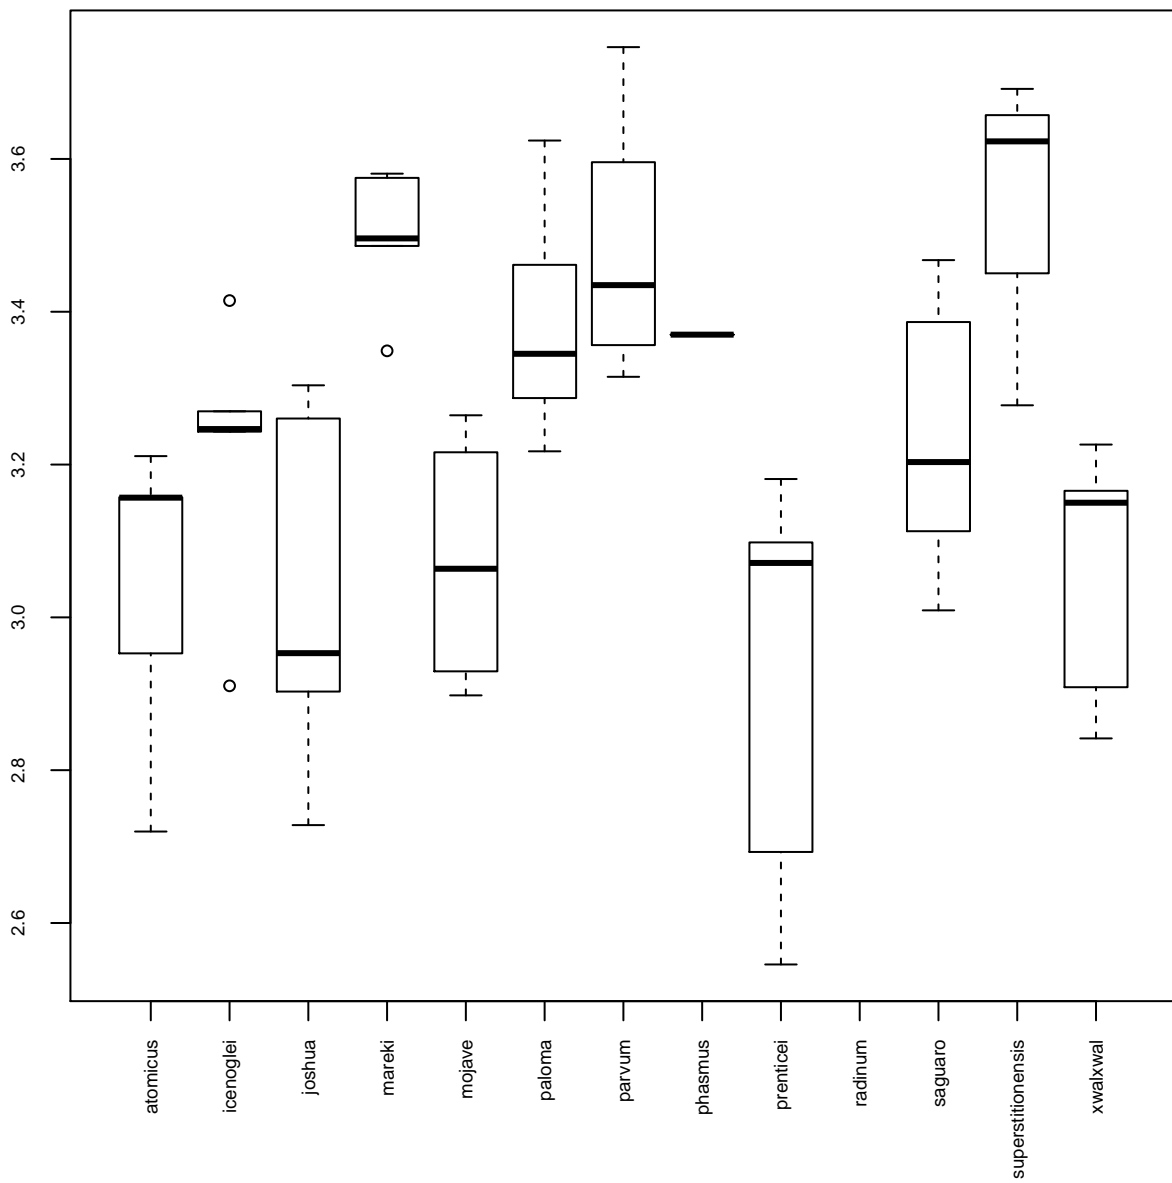

Supplement: Supplementary file 532

# Tibia 3/Metatarsus 3 ratio – males

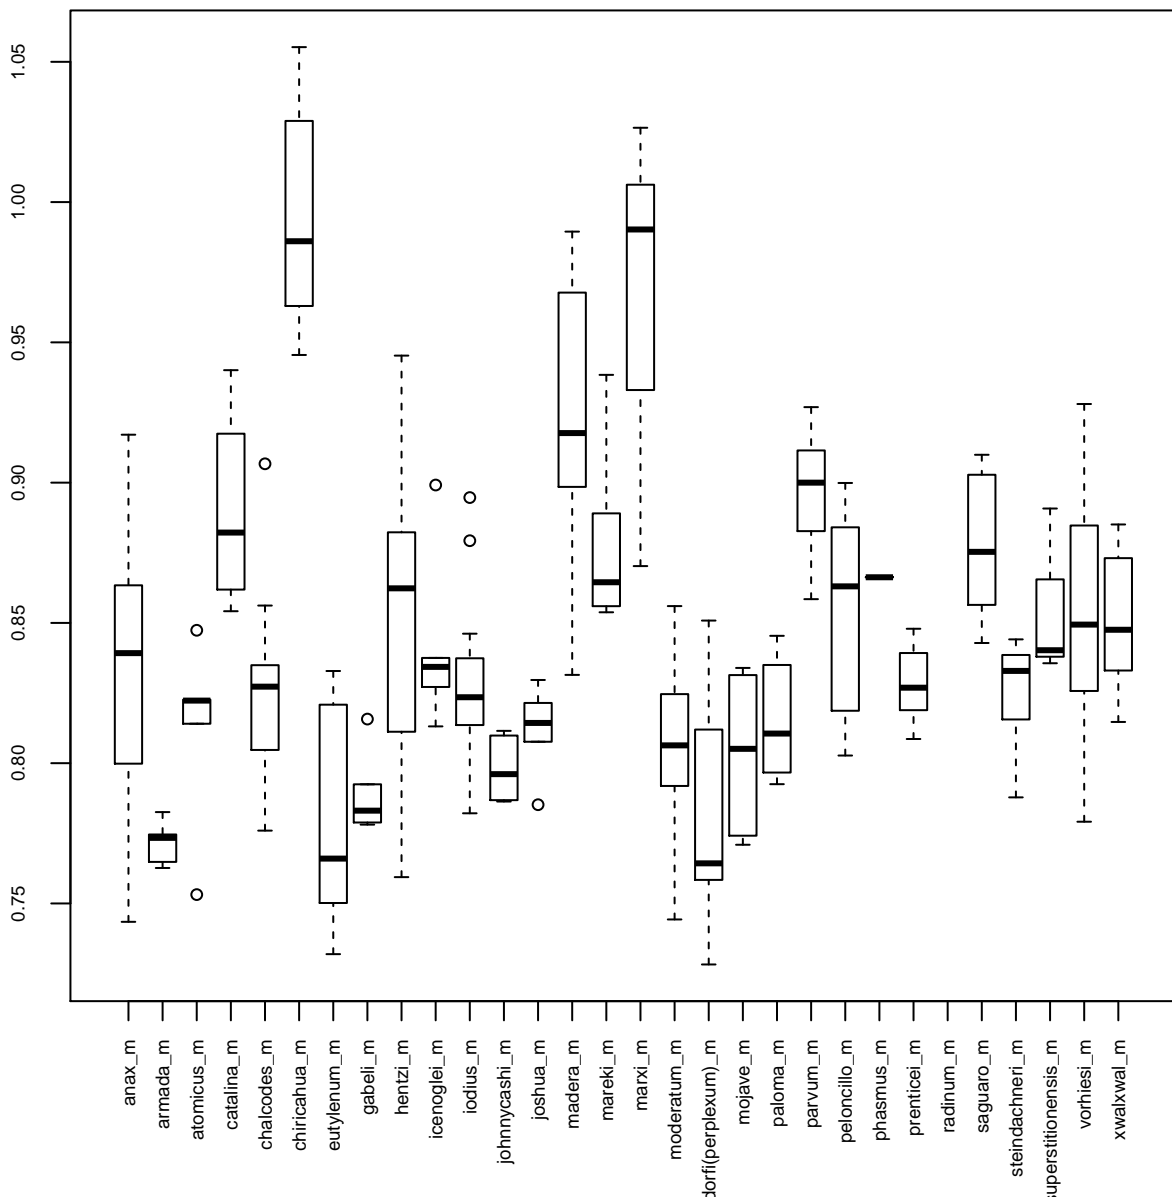

Supplement: Supplementary file 533

## Tarsus 1/Tibia 3 Length ratio – males

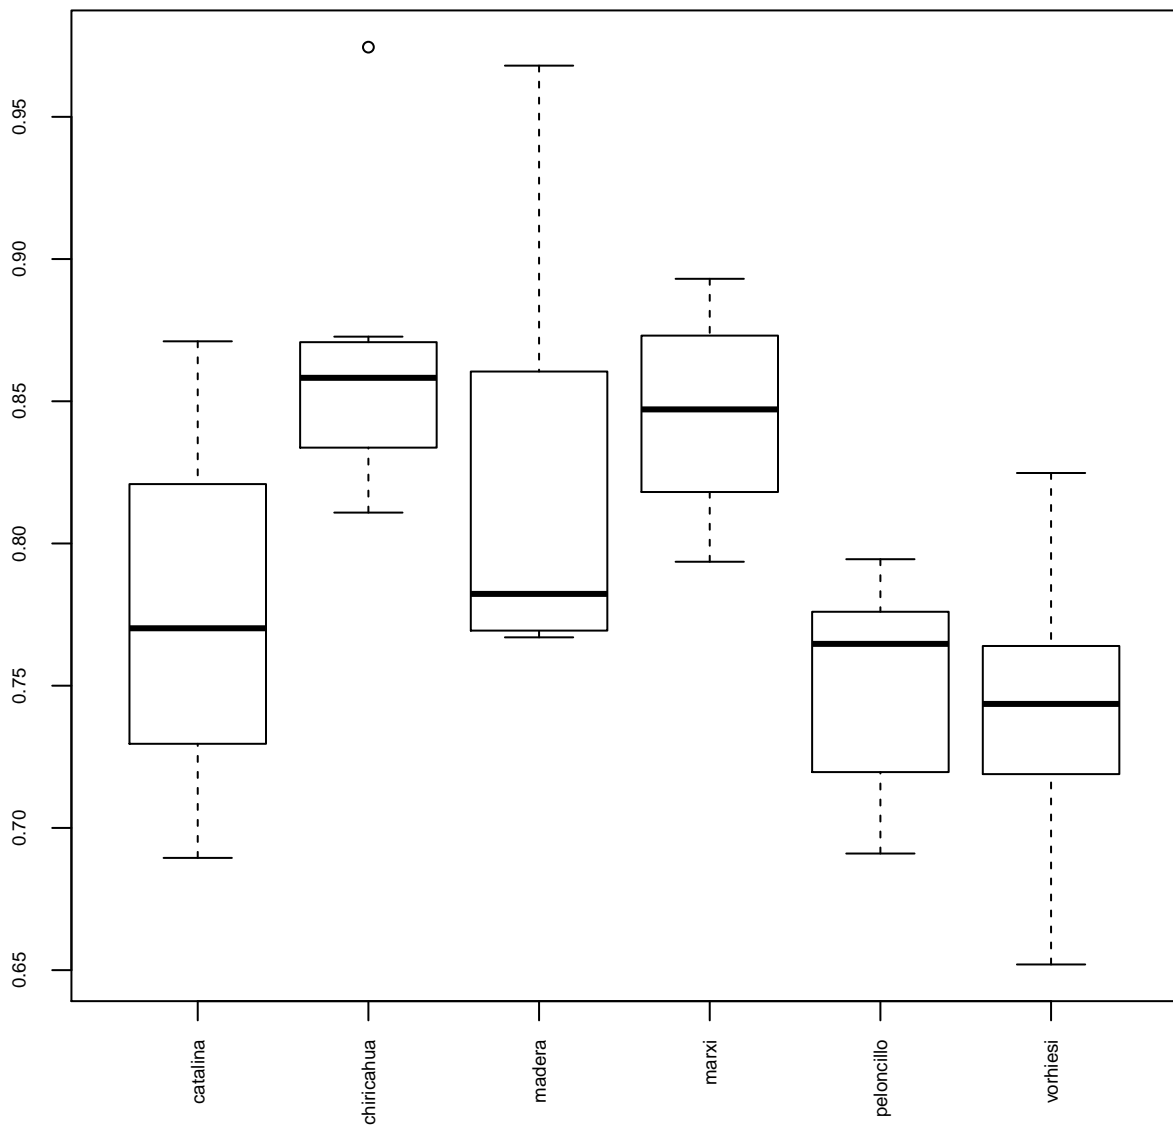

Supplement: Supplementary file 534

## Patella 1/Tarsus 1 ratio – males

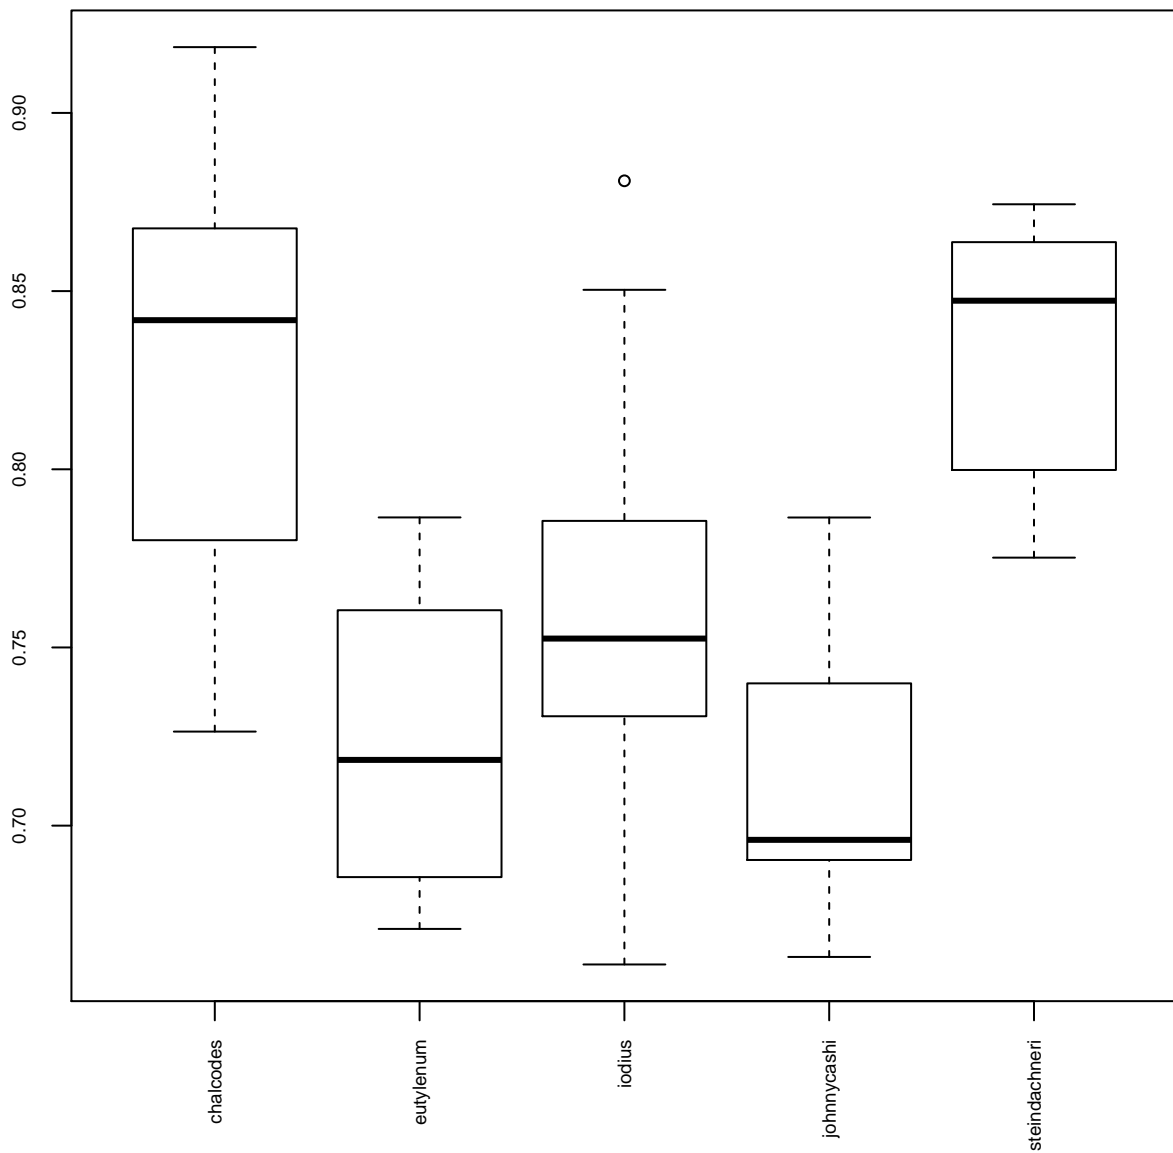

Supplement: Supplementary file 535

## Metatarsus 3/Tarsus 4 Length ratio – females

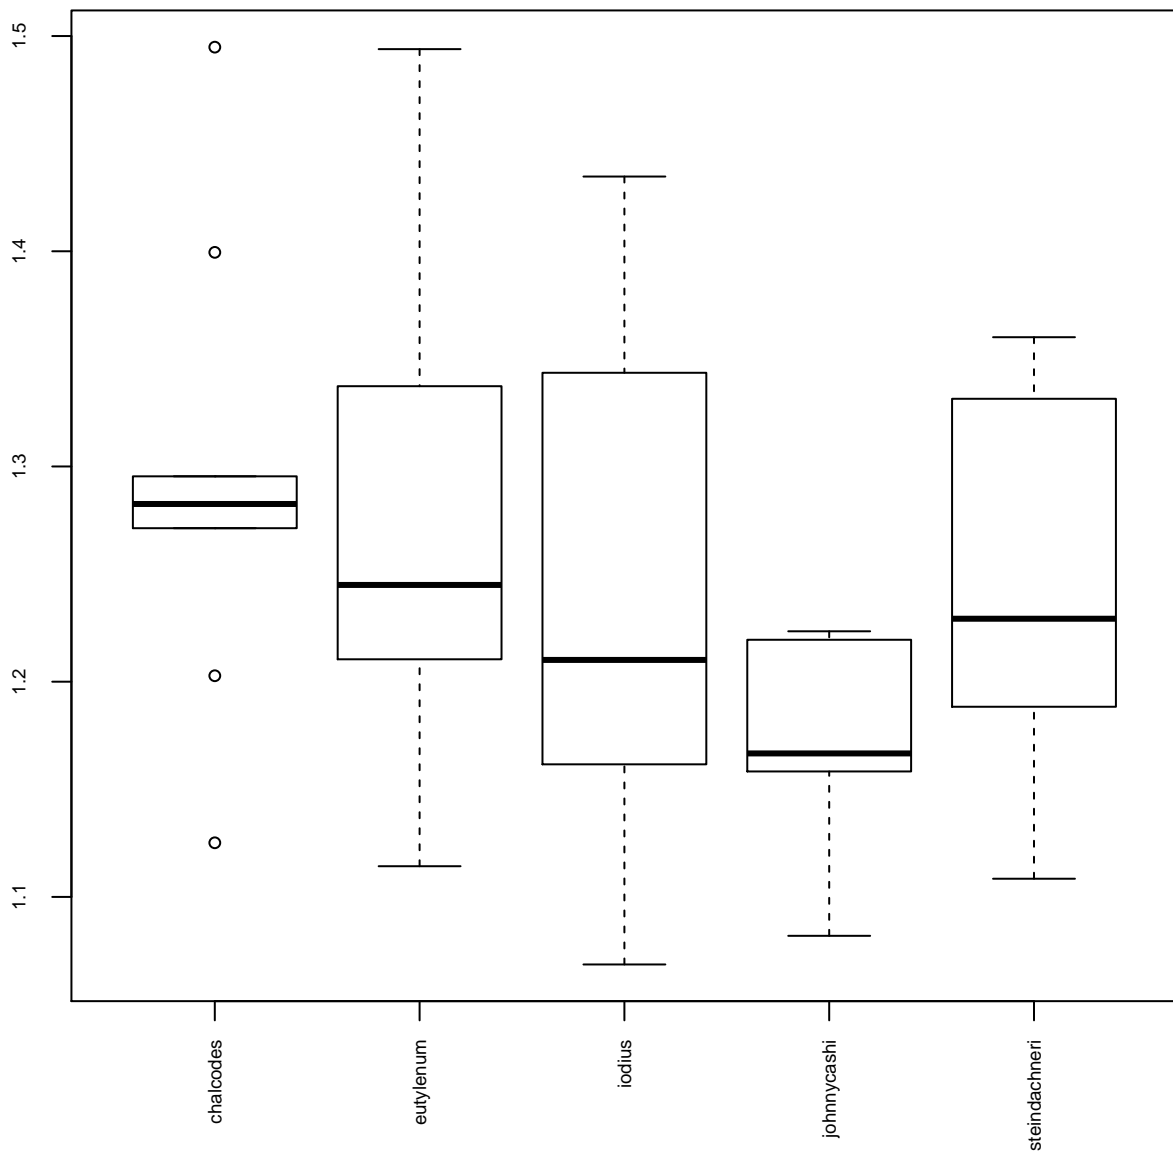

Supplement: Supplementary file 536

## Leg 3 Length/Carapace Length ratio – males

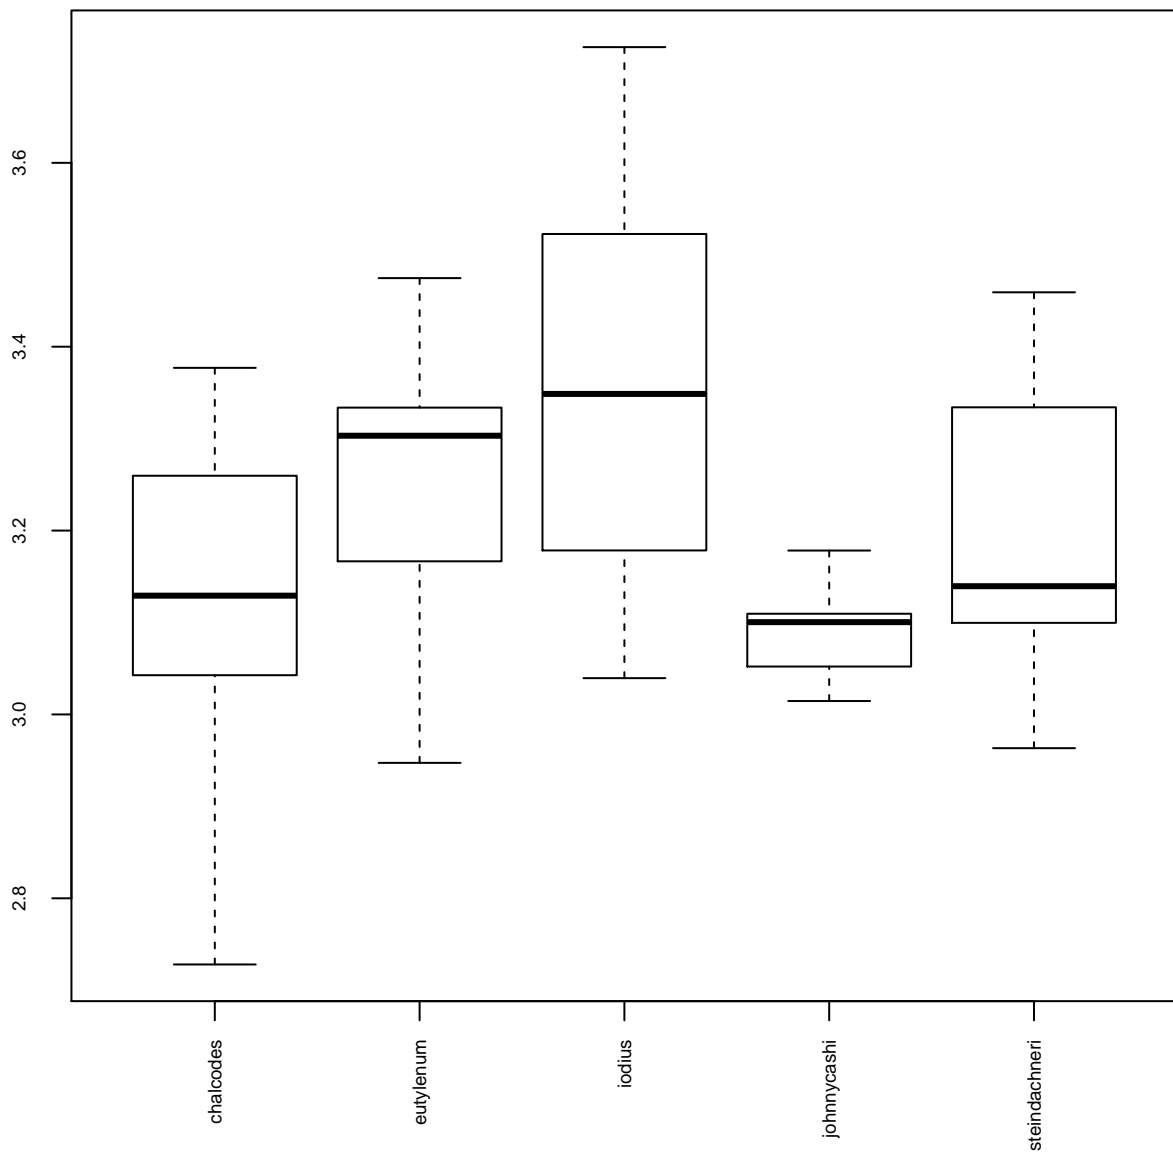

Supplement: Supplementary file 537

## Metatarsus 1/Patella 4 Length ratio – females

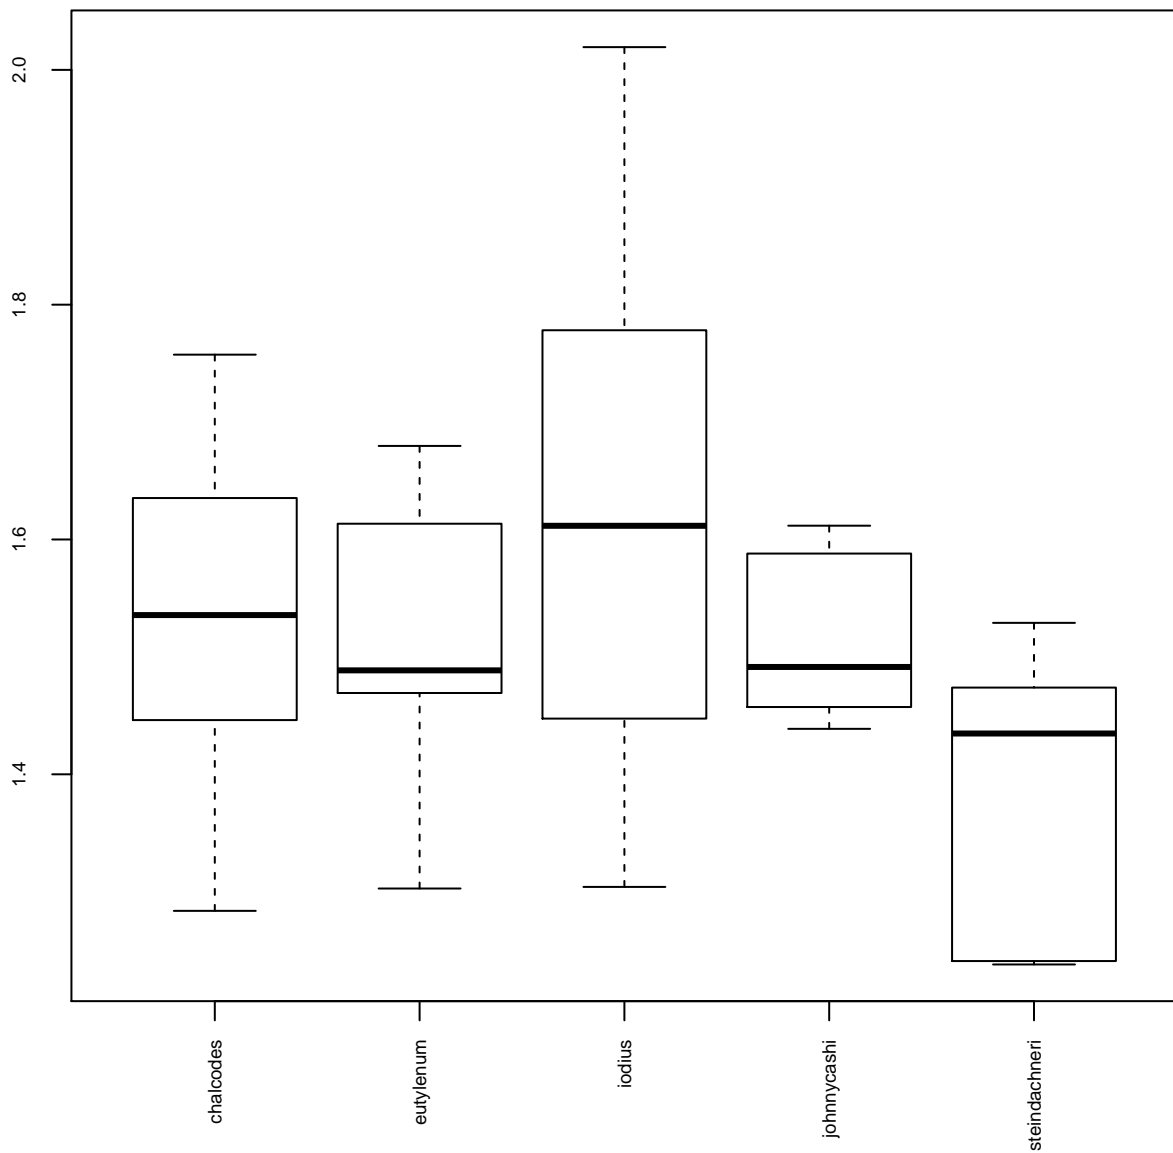

Supplement: Supplementary file 538

# Tarsus 1/Tibia 4 Length ratio – males

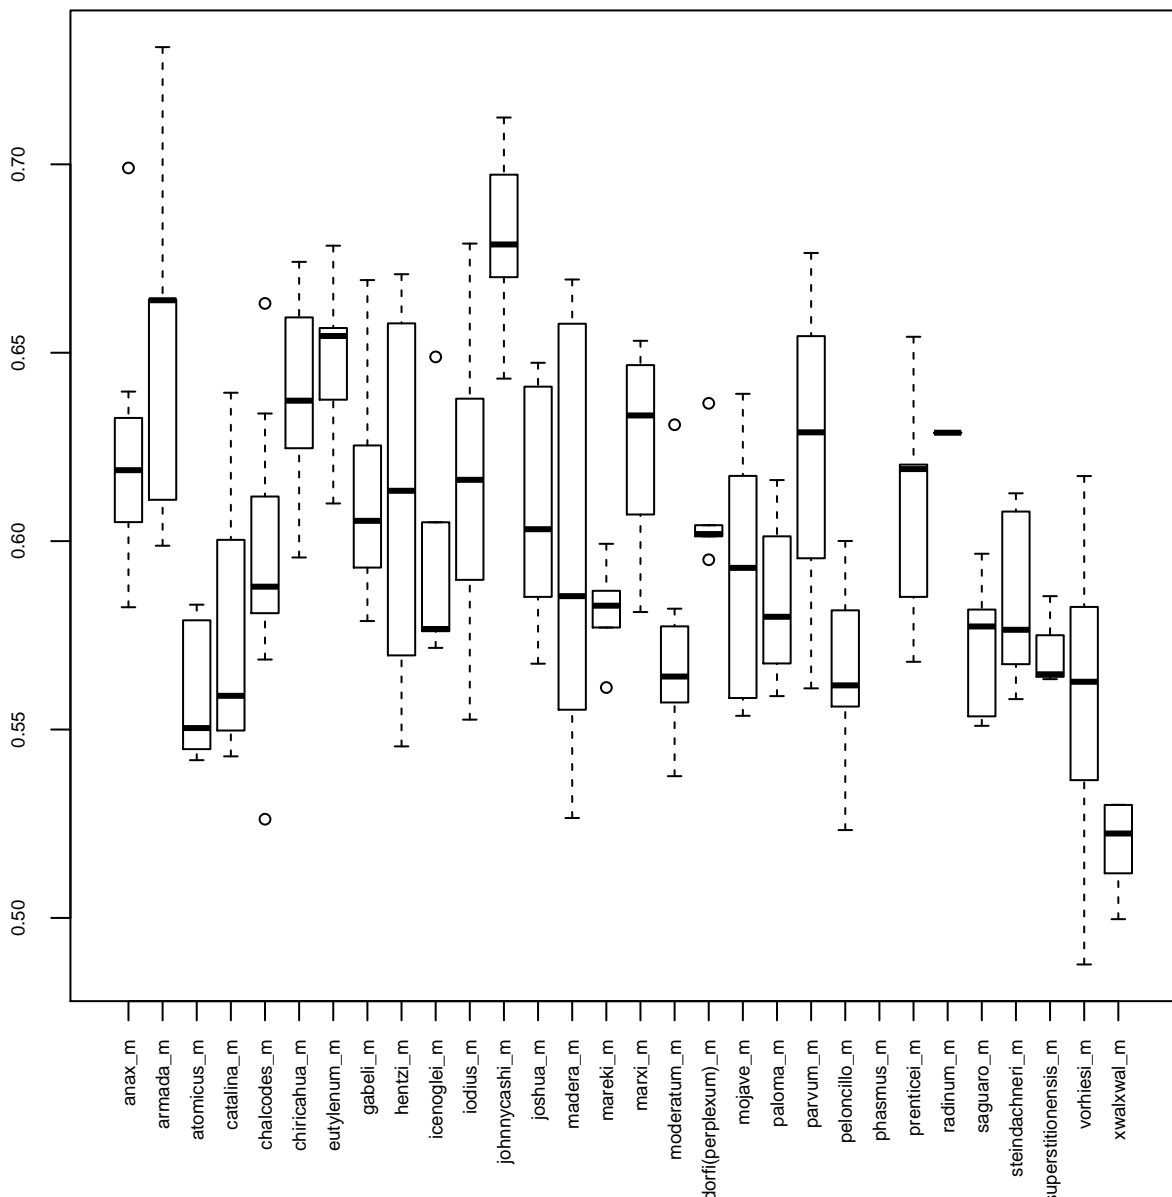

Supplement: Supplementary file 539

## Tarsus 3/Femur 4 Length ratio – males

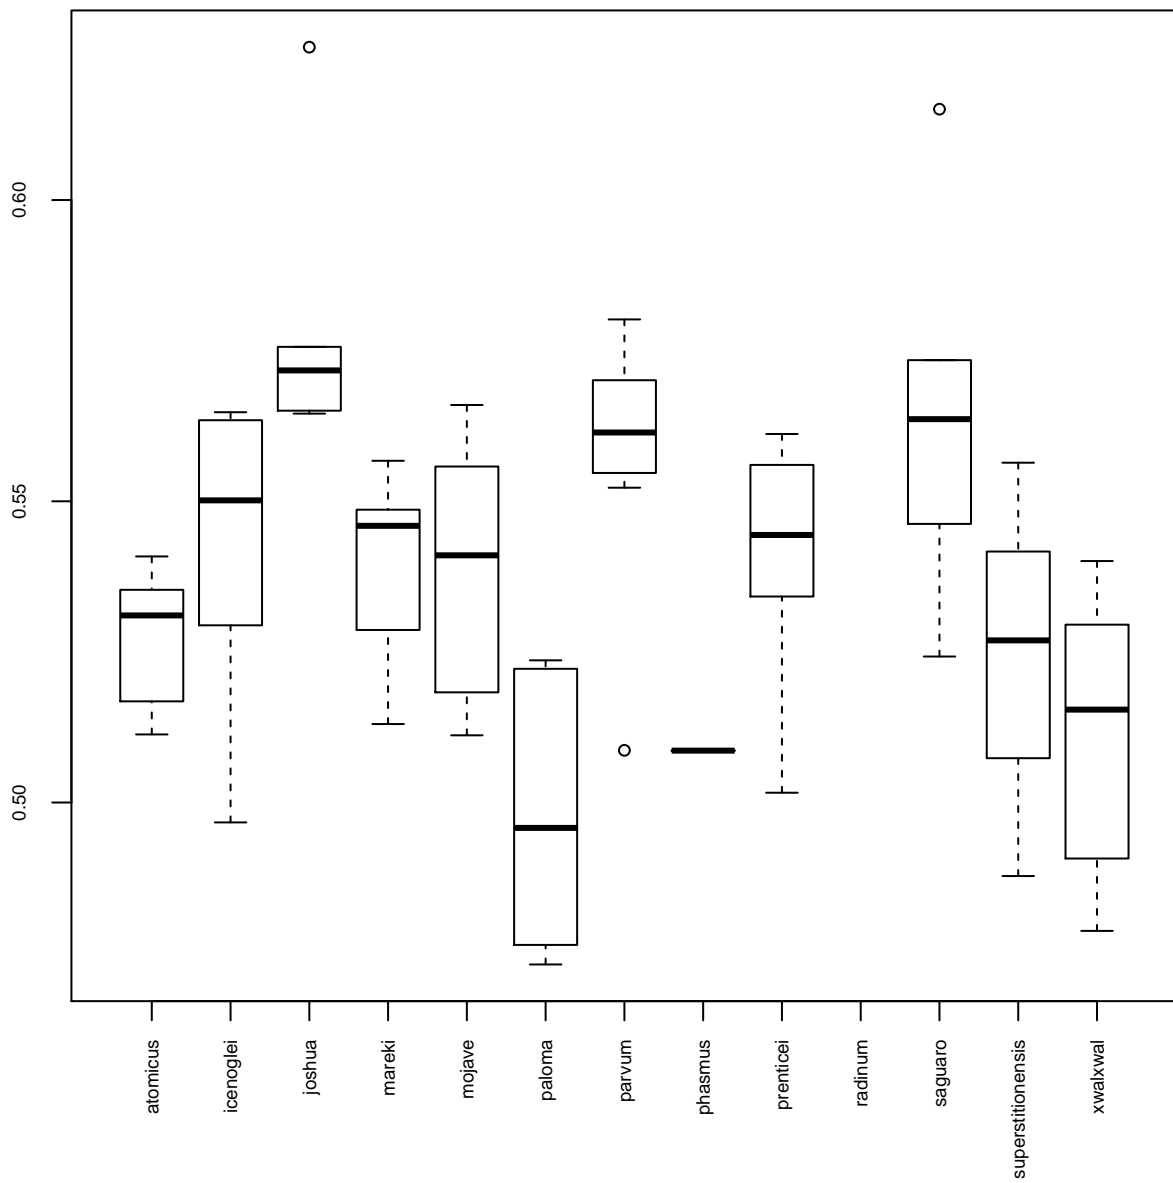

Supplement: Supplementary file 540

## Patella 1/Femur 3 Length ratio – females

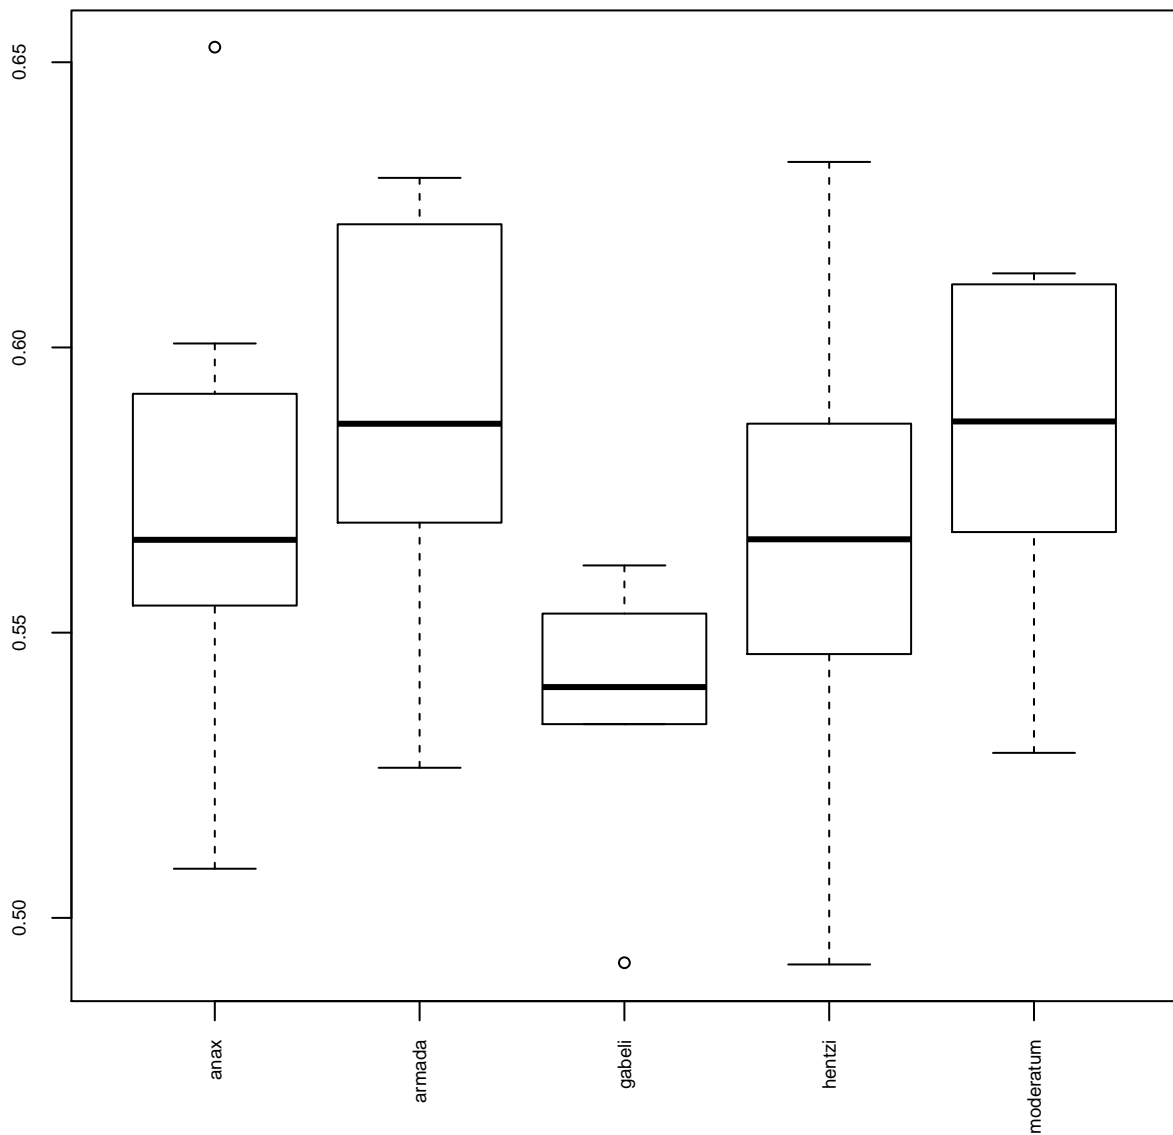

Supplement: Supplementary file 541

## Carapace Length/Tarsus 1 ratio – females

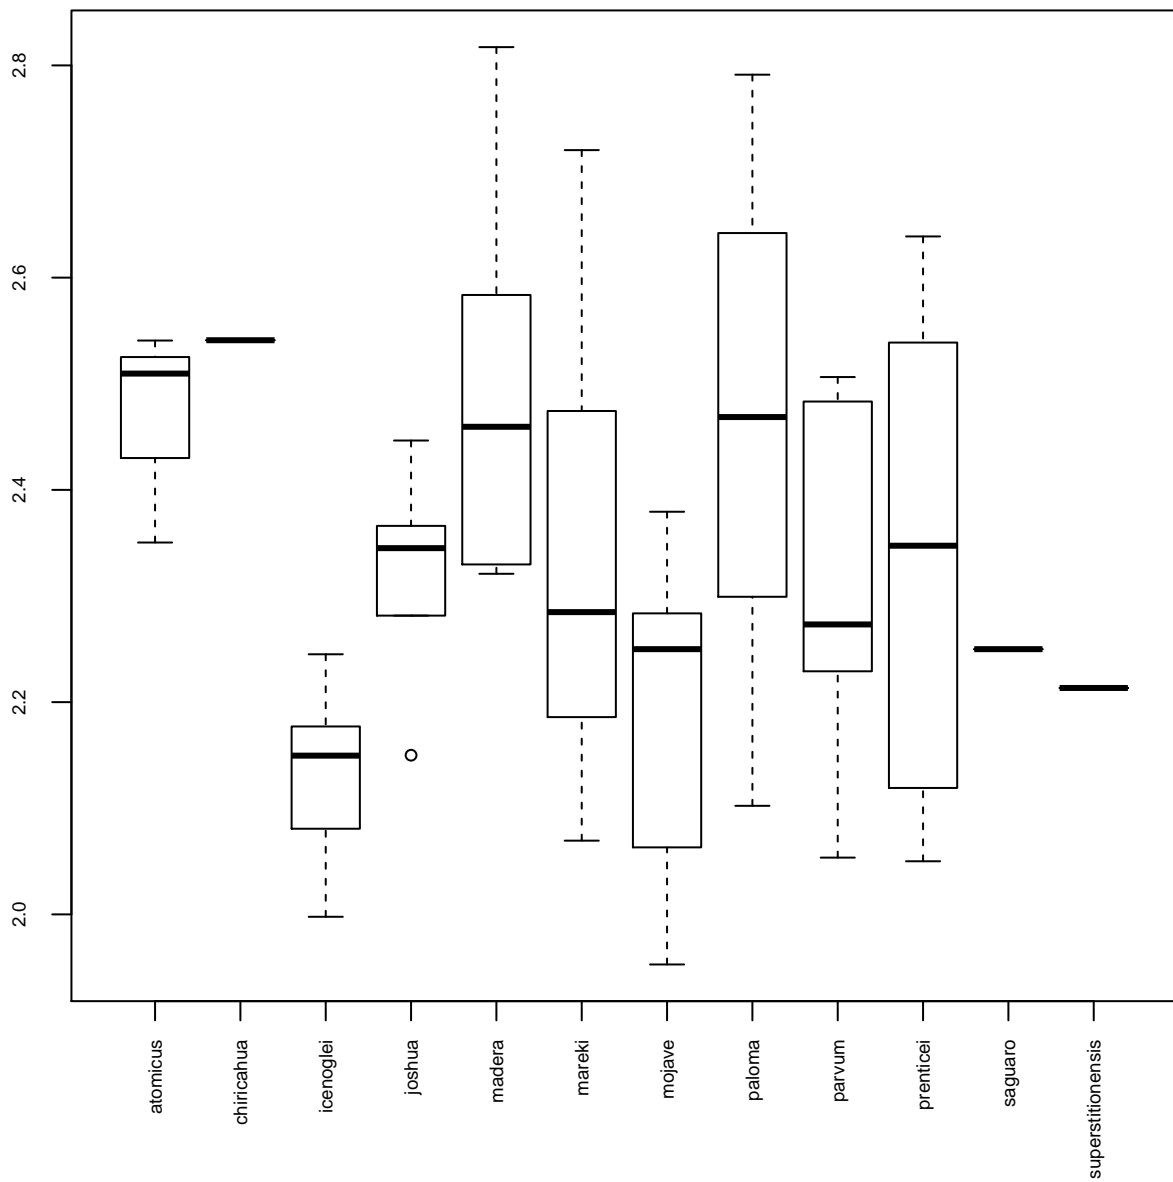

Supplement: Supplementary file 542

## Patella 4/Tarsus 4 ratio – females

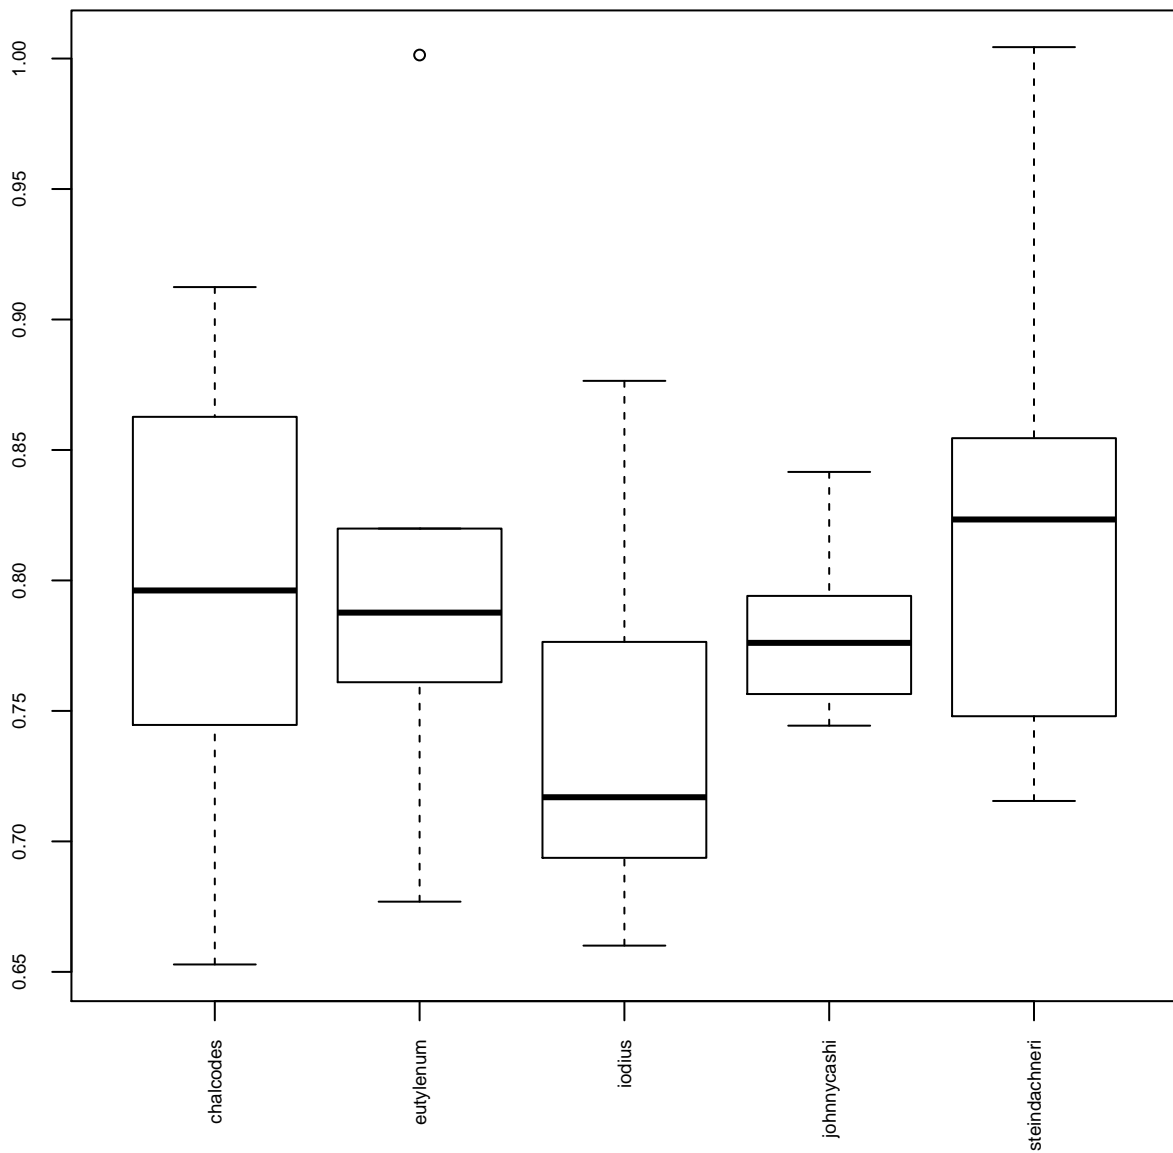

Supplement: Supplementary file 543

# Metatarsus 3/Tarsus 4 Length ratio – males

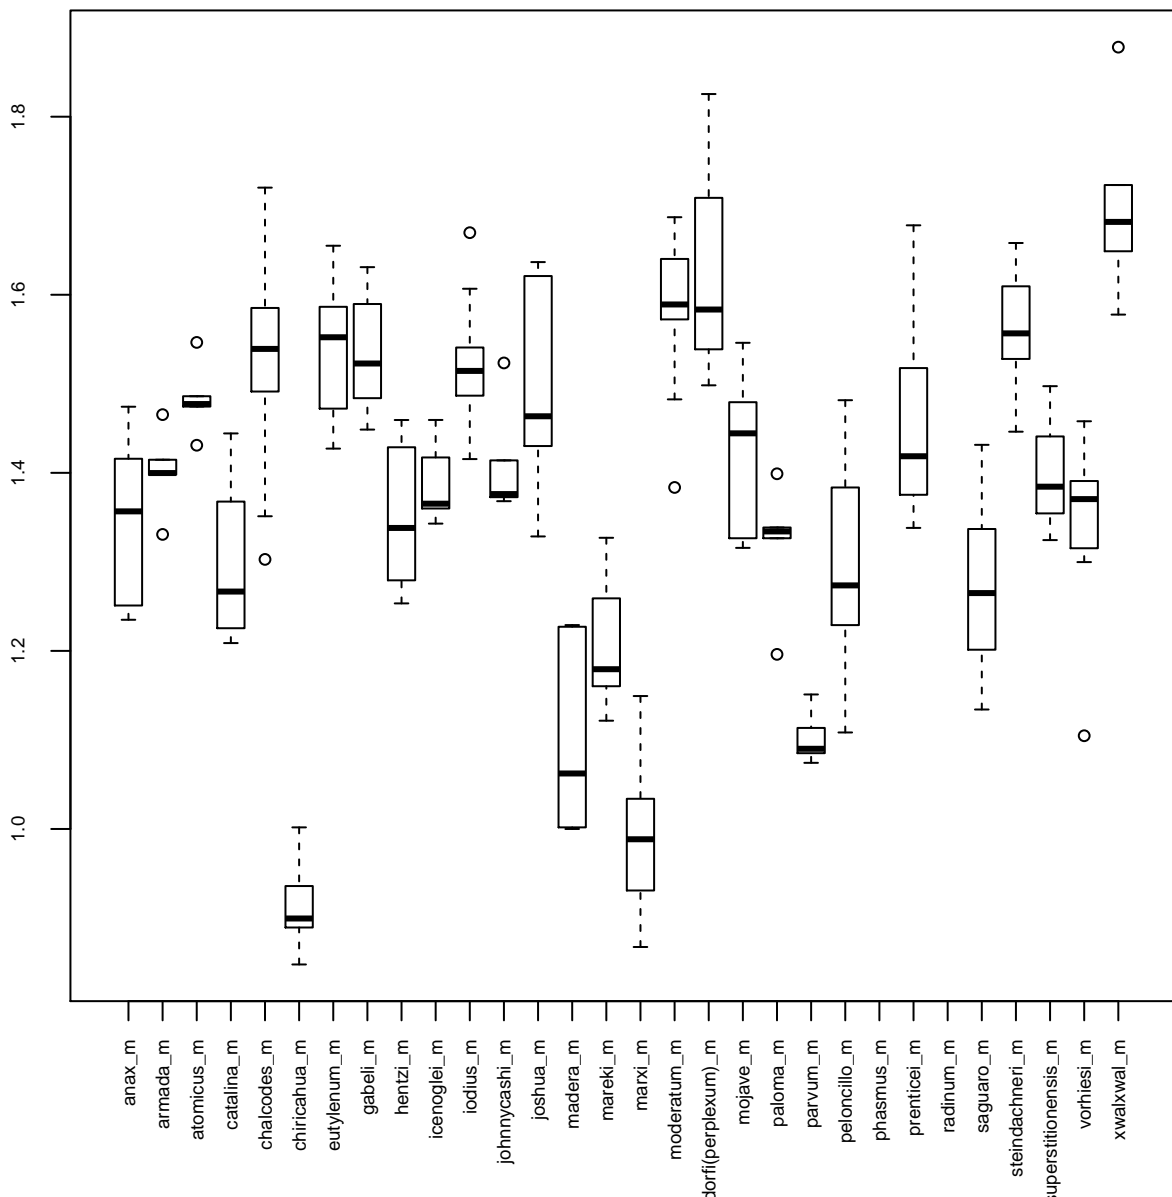

Supplement: Supplementary file 544

# Tibia 3/Tarsus 3 ratio – females

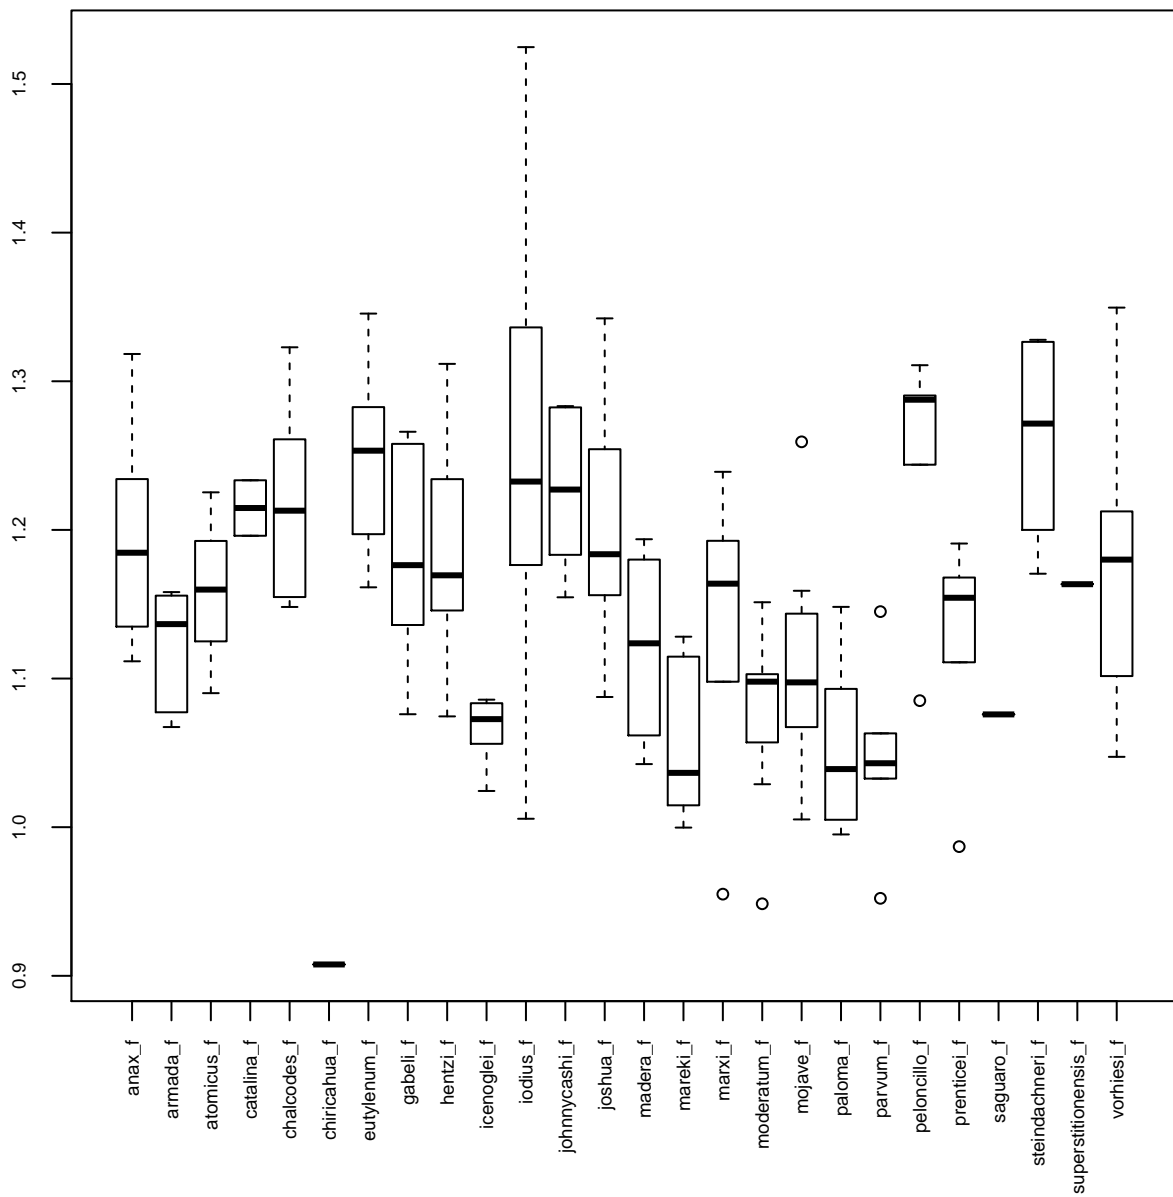

Supplement: Supplementary file 545

# Carapace Length/Femur 3 ratio – males

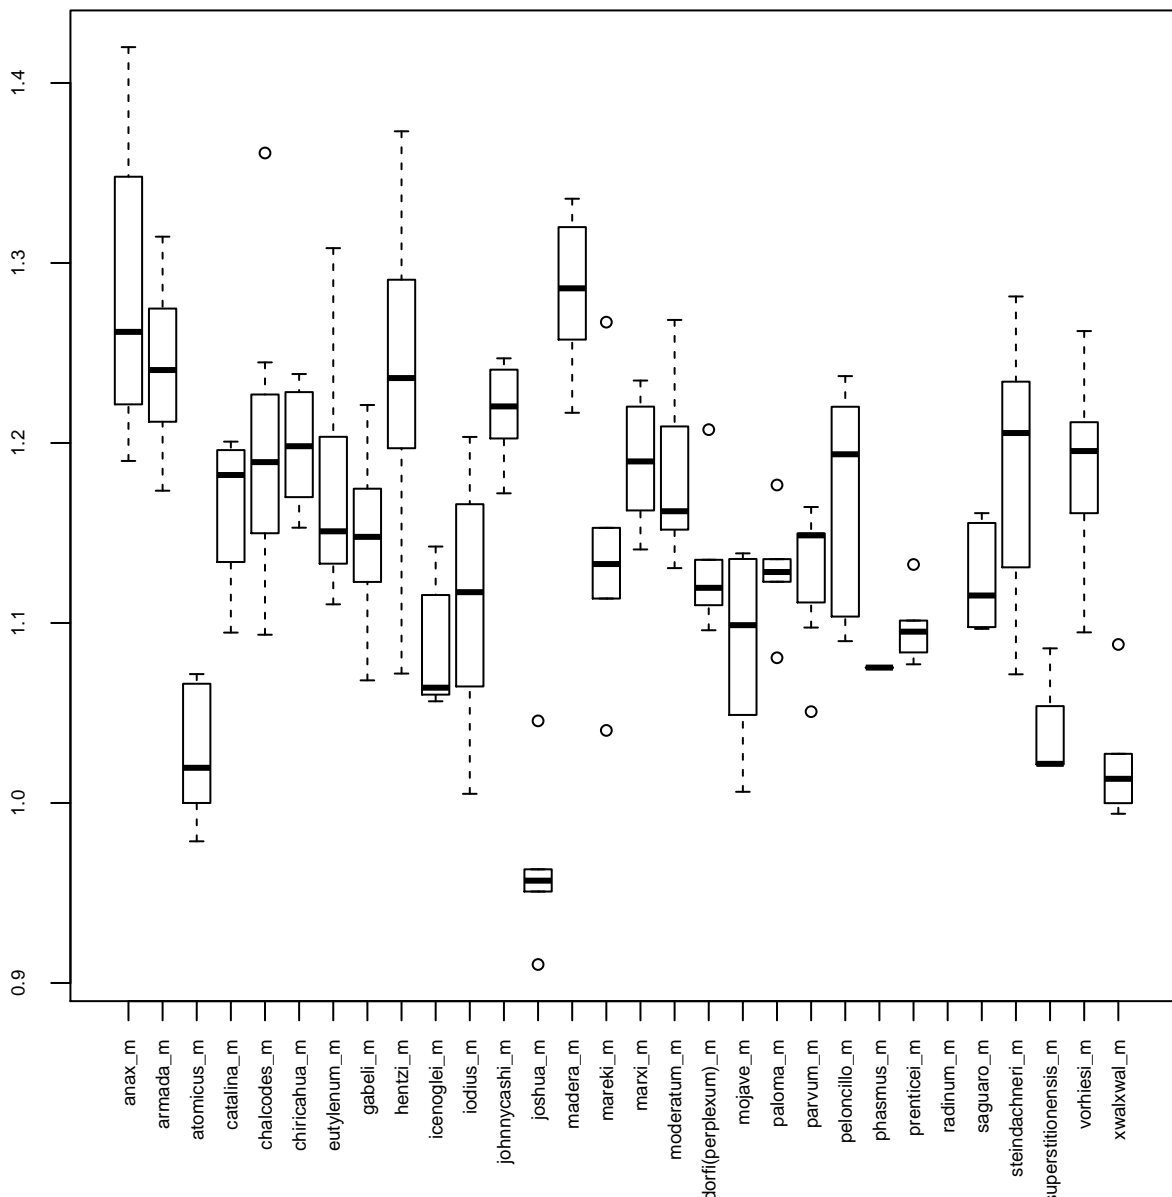

Supplement: Supplementary file 546

## Leg 4 Length – males

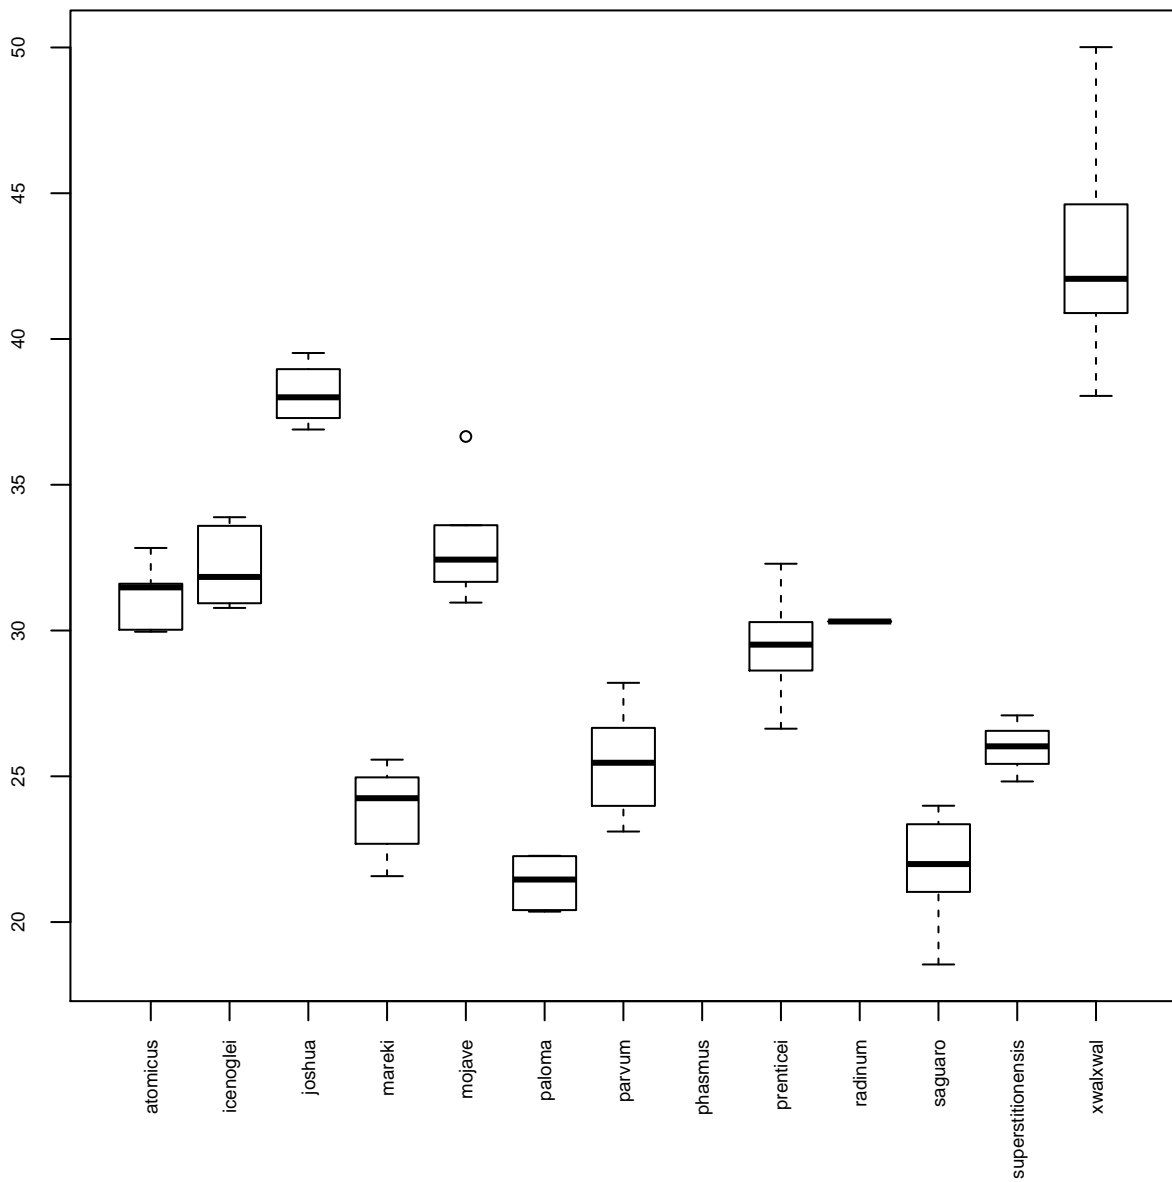

Supplement: Supplementary file 547

## Palpal Tibia/Patella 3 Length ratio – males

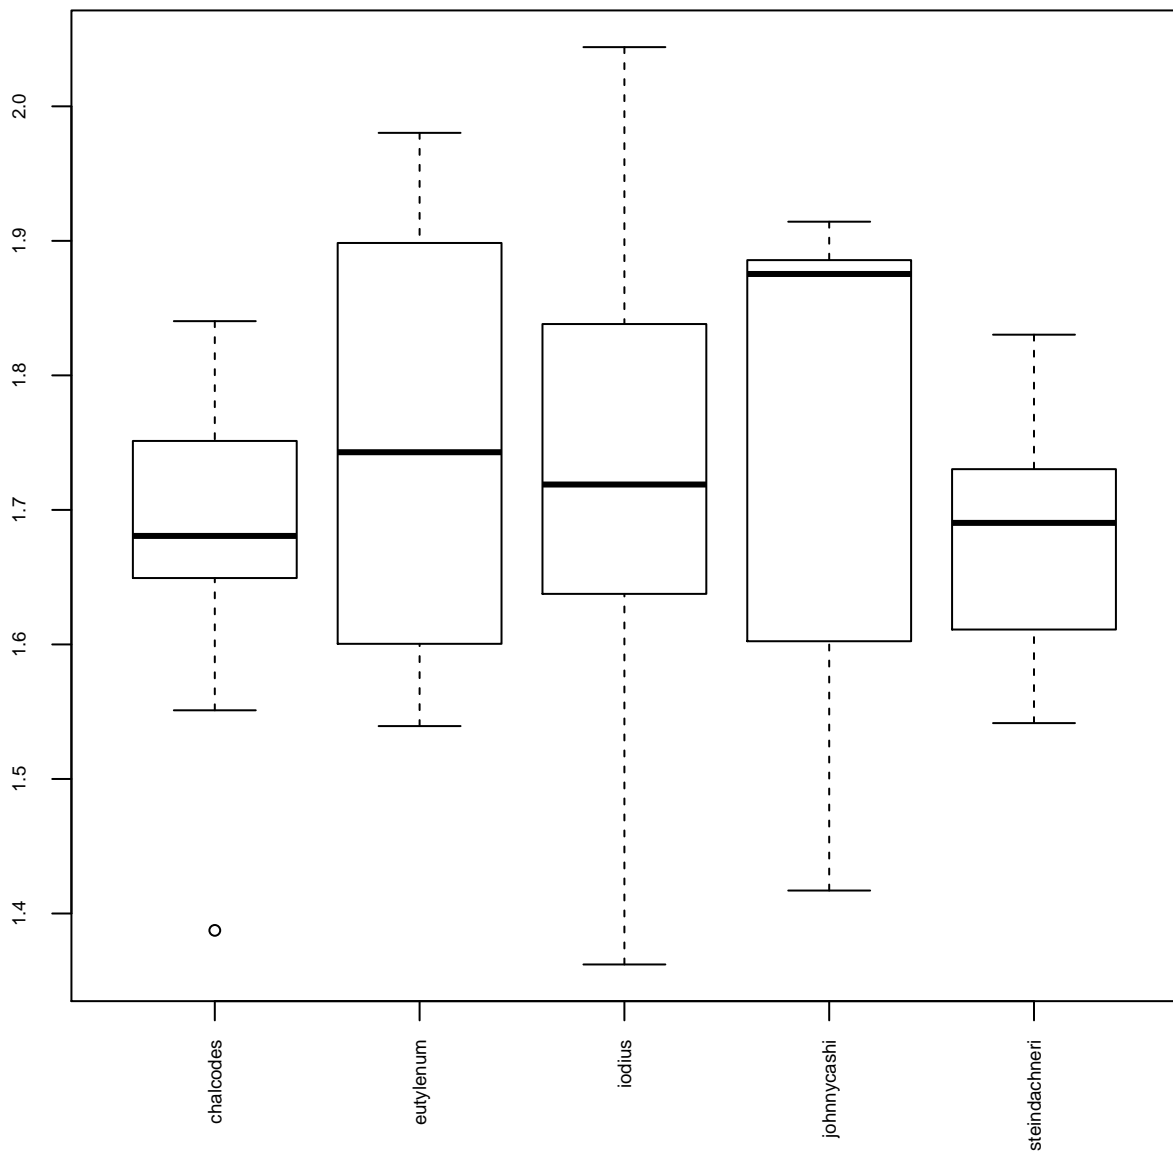

Supplement: Supplementary file 548

# Femur 1/Tibia 1 ratio – females

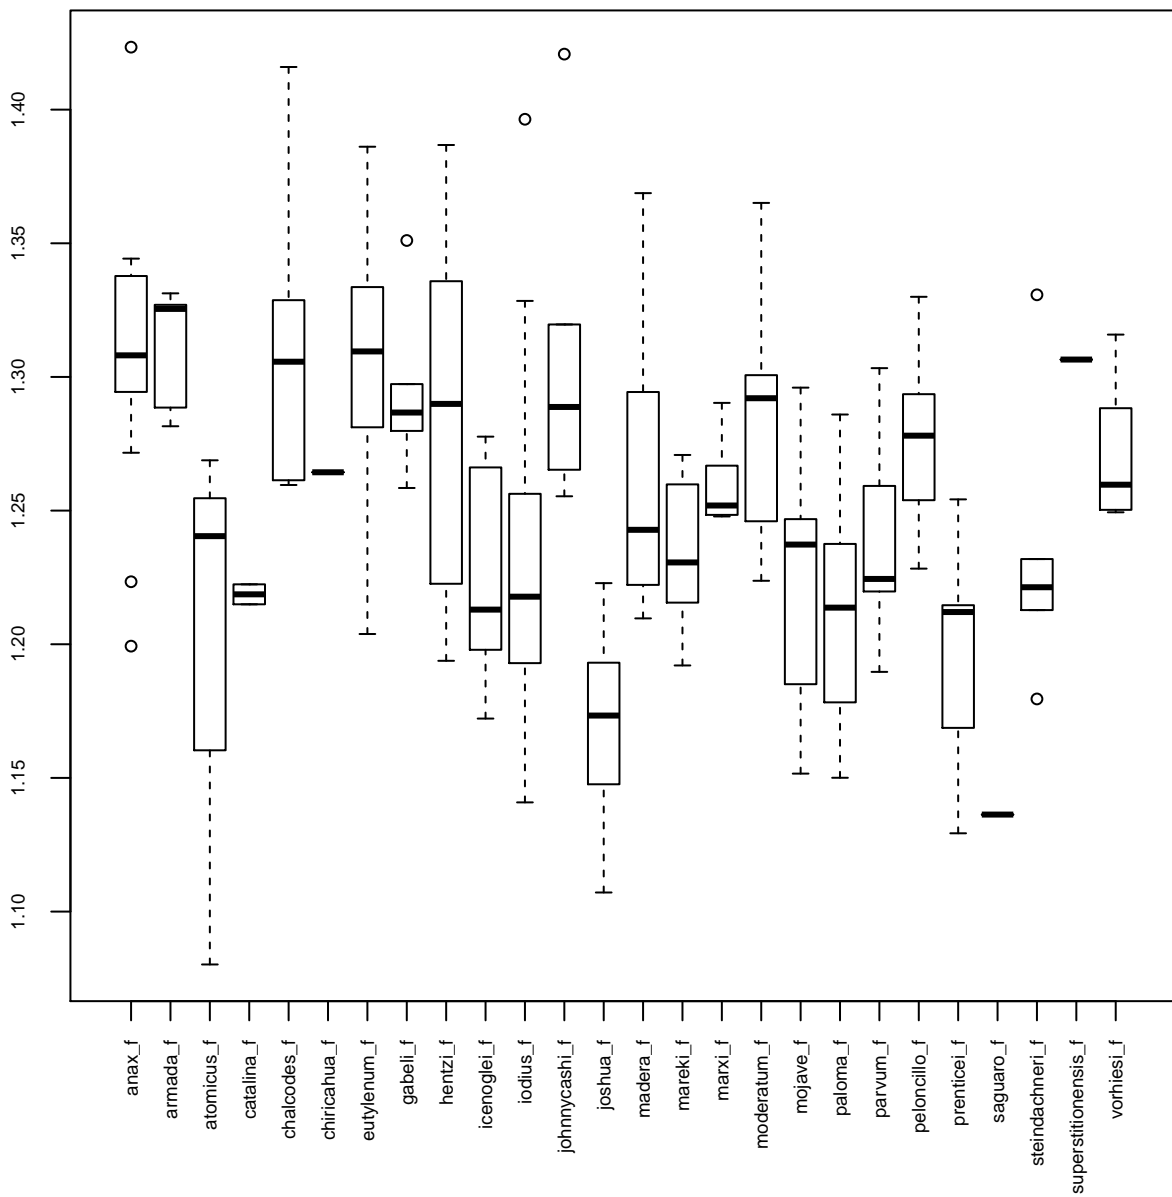

Supplement: Supplementary file 549

## Patella 1/Tarsus 3 Length ratio – females

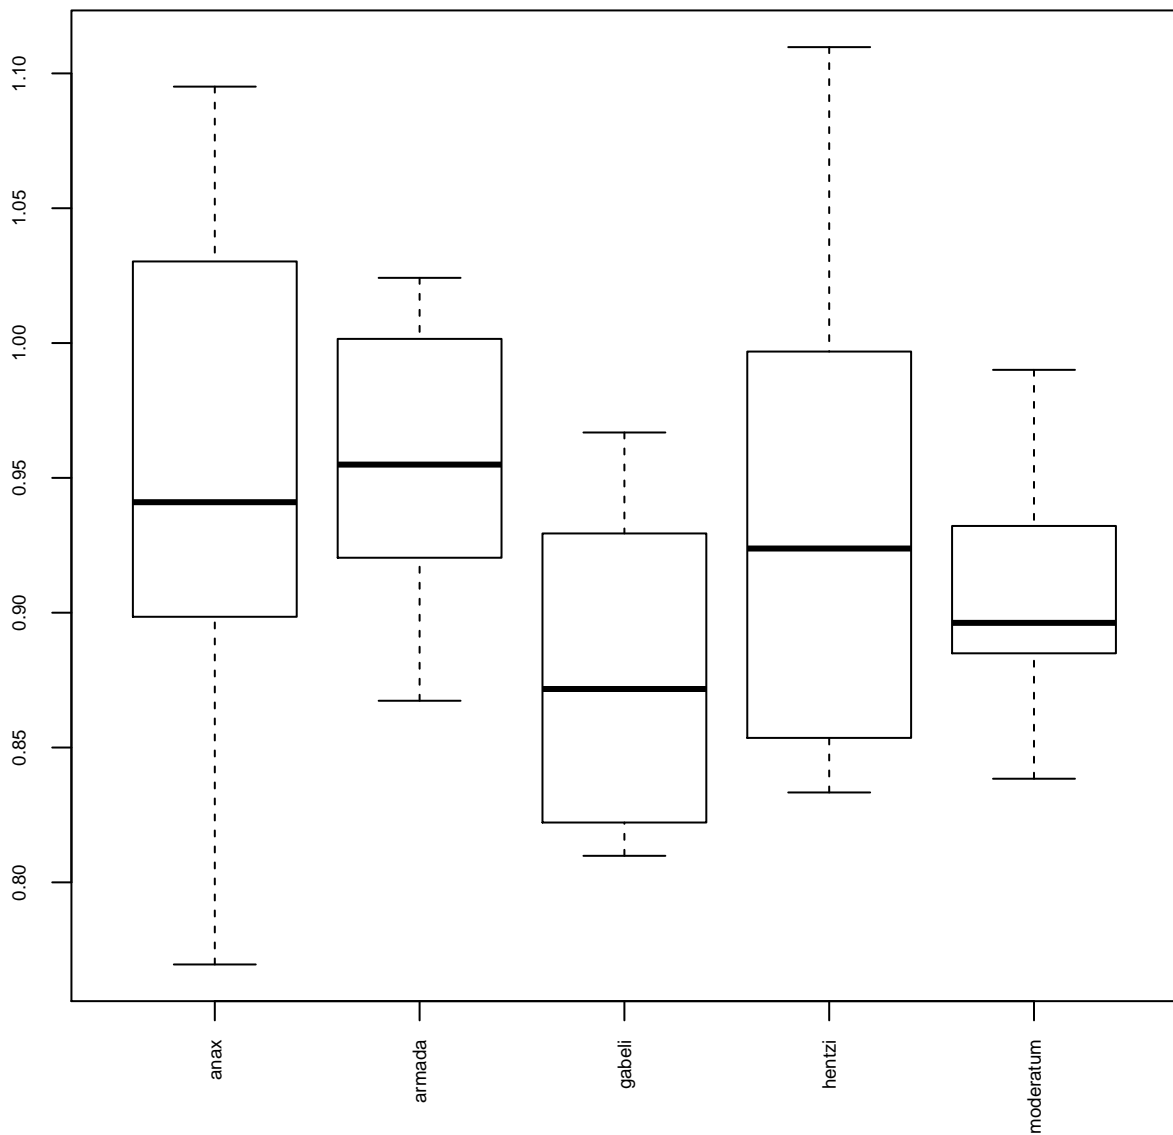

Supplement: Supplementary file 550

# Carapace Length/Femur 4 ratio – males

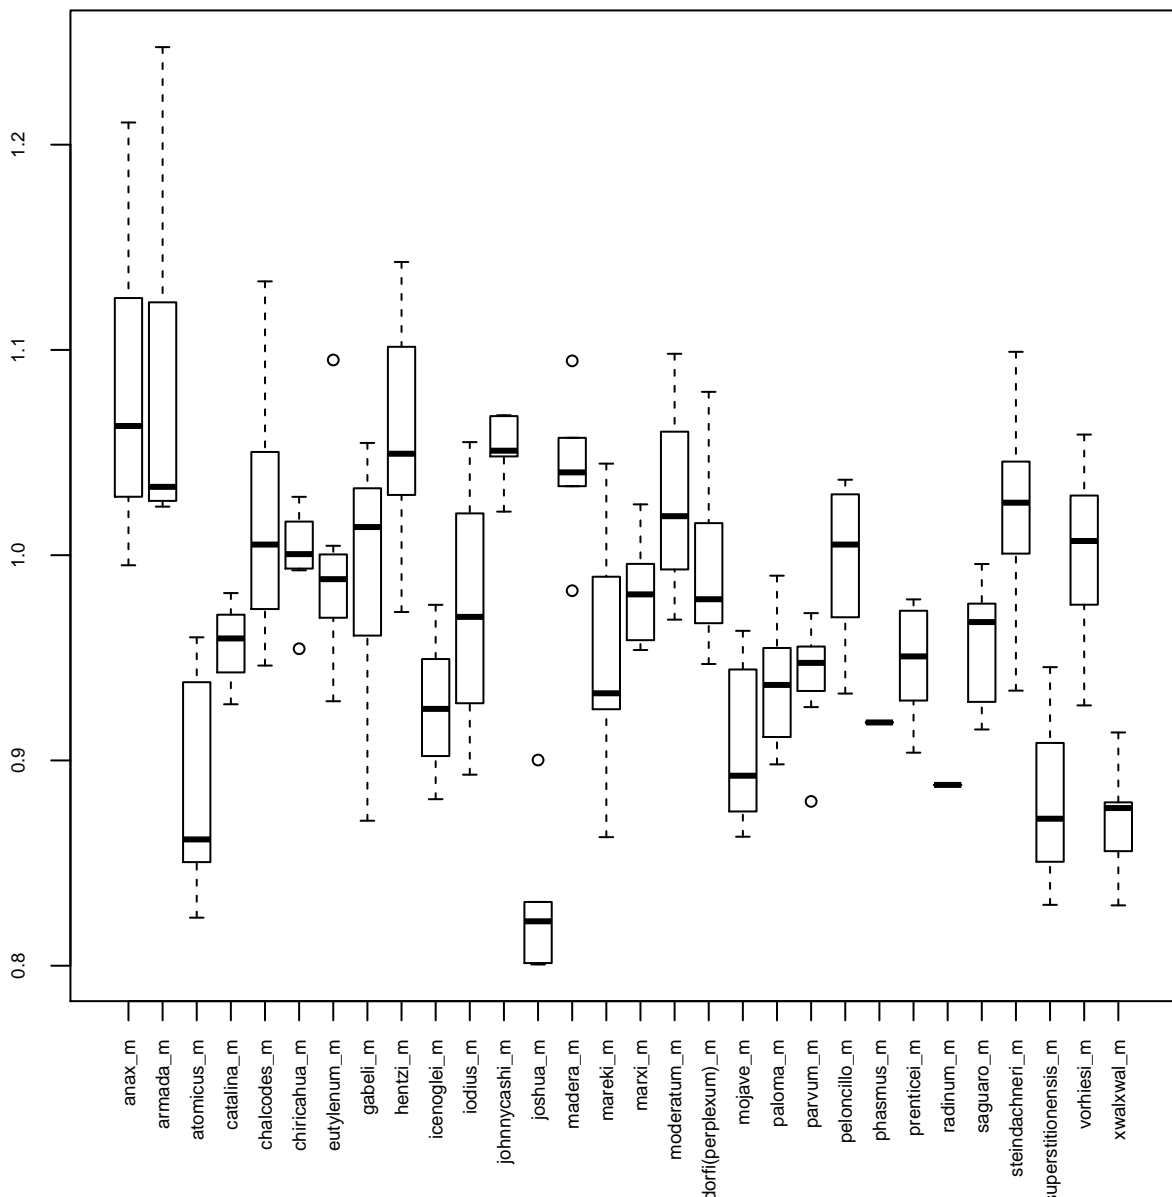

Supplement: Supplementary file 551

## Patella 1/Tibia 1 ratio – females

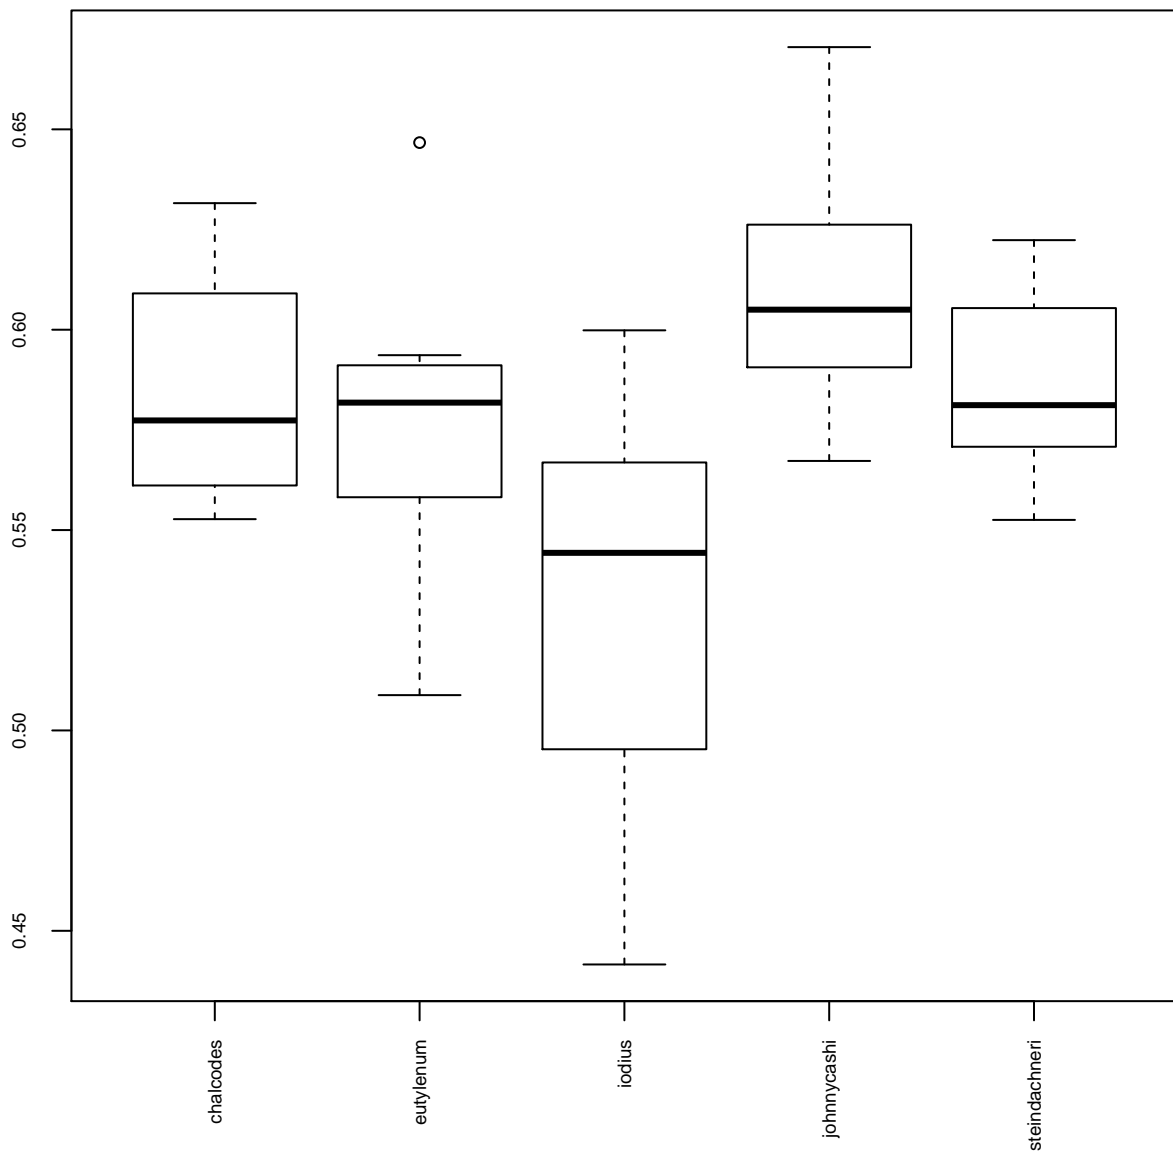

Supplement: Supplementary file 552

## Femur 1/Metatarsus 1 ratio – males

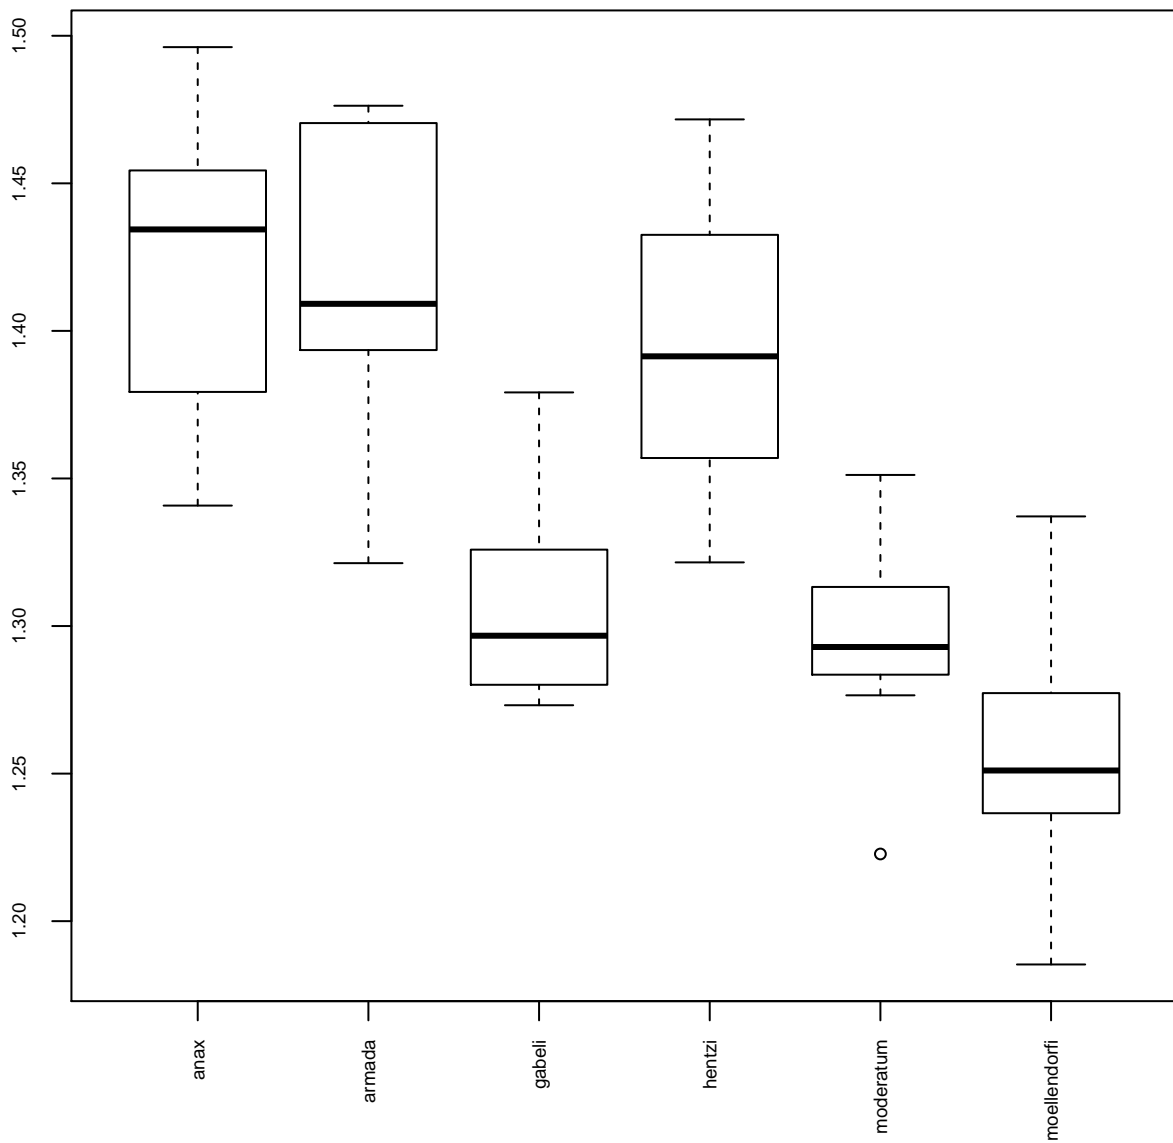

Supplement: Supplementary file 553

# Metatarsus 1/Patella 3 Length ratio – females

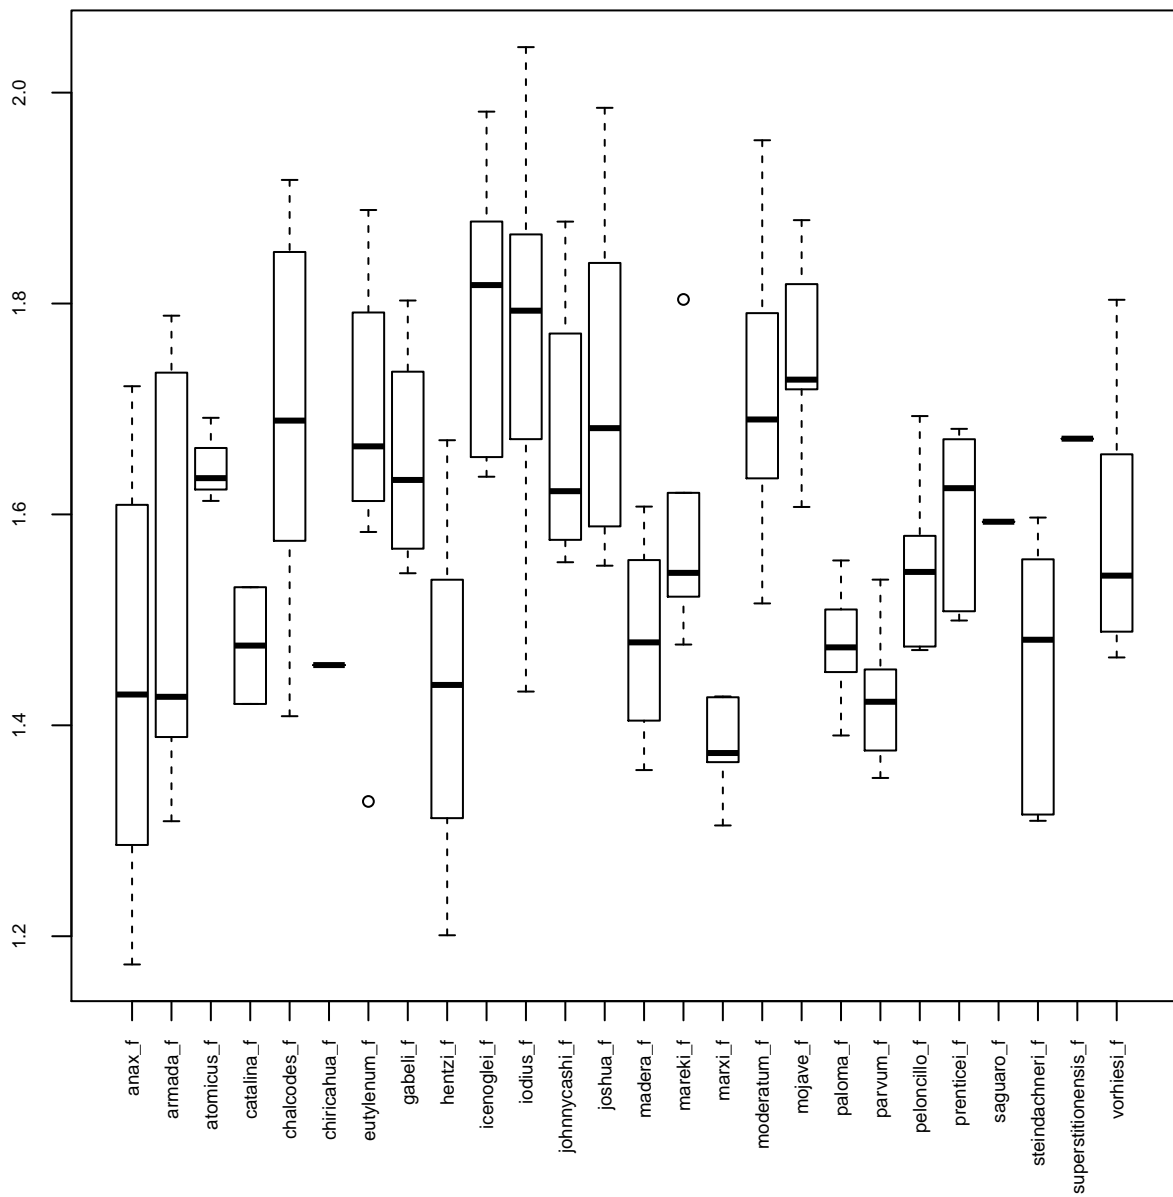

Supplement: Supplementary file 554

# Patella 1/Metatarsus 3 Length ratio – females

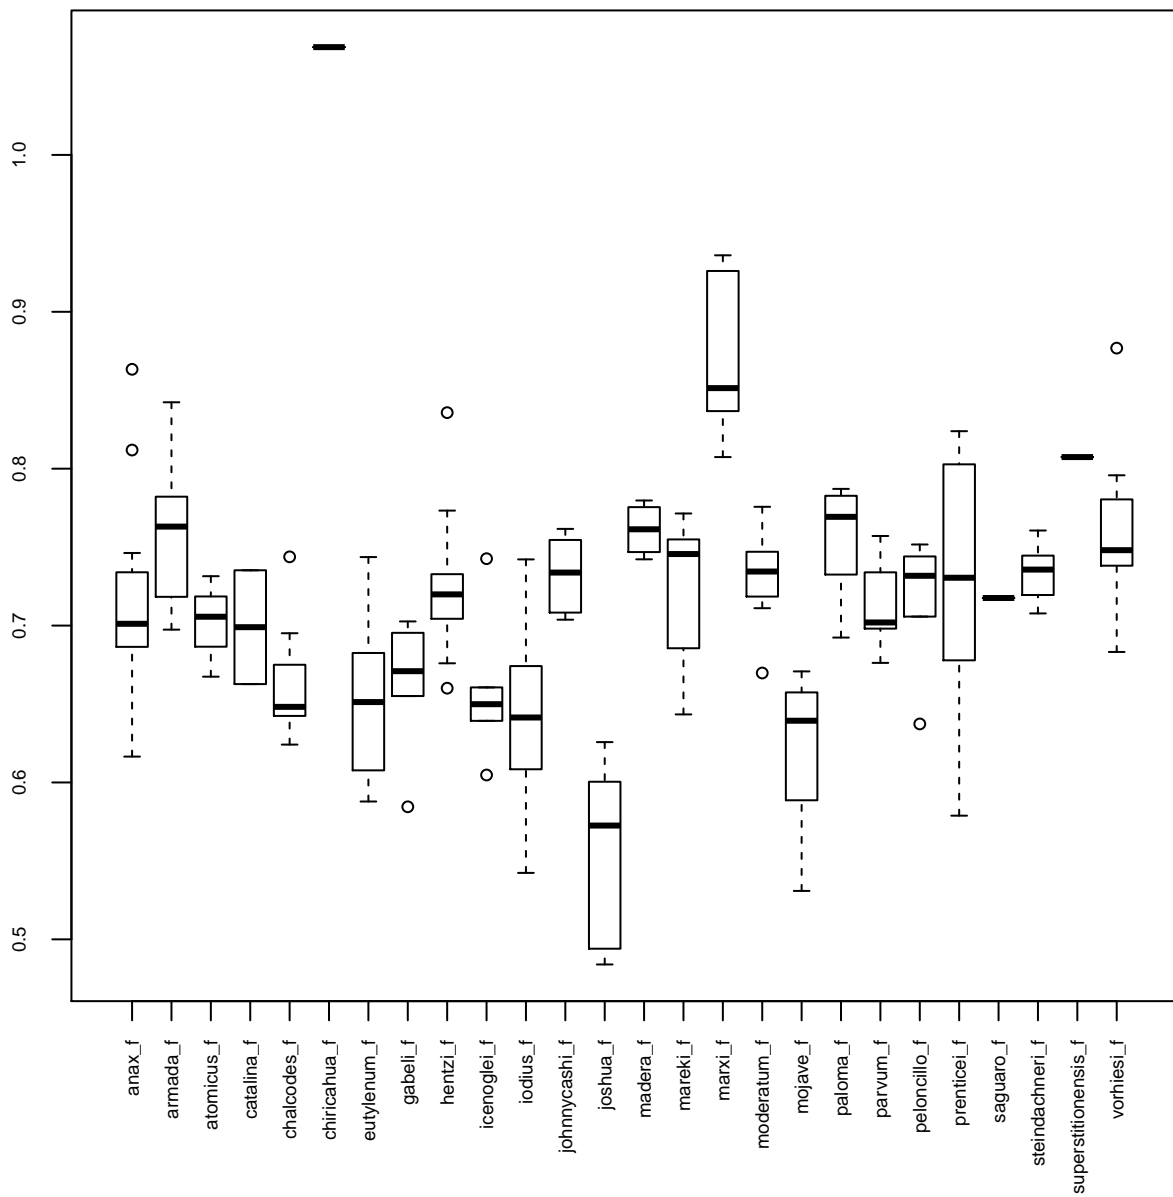

Supplement: Supplementary file 555

## Femur 4/Tarsus 4 ratio – females

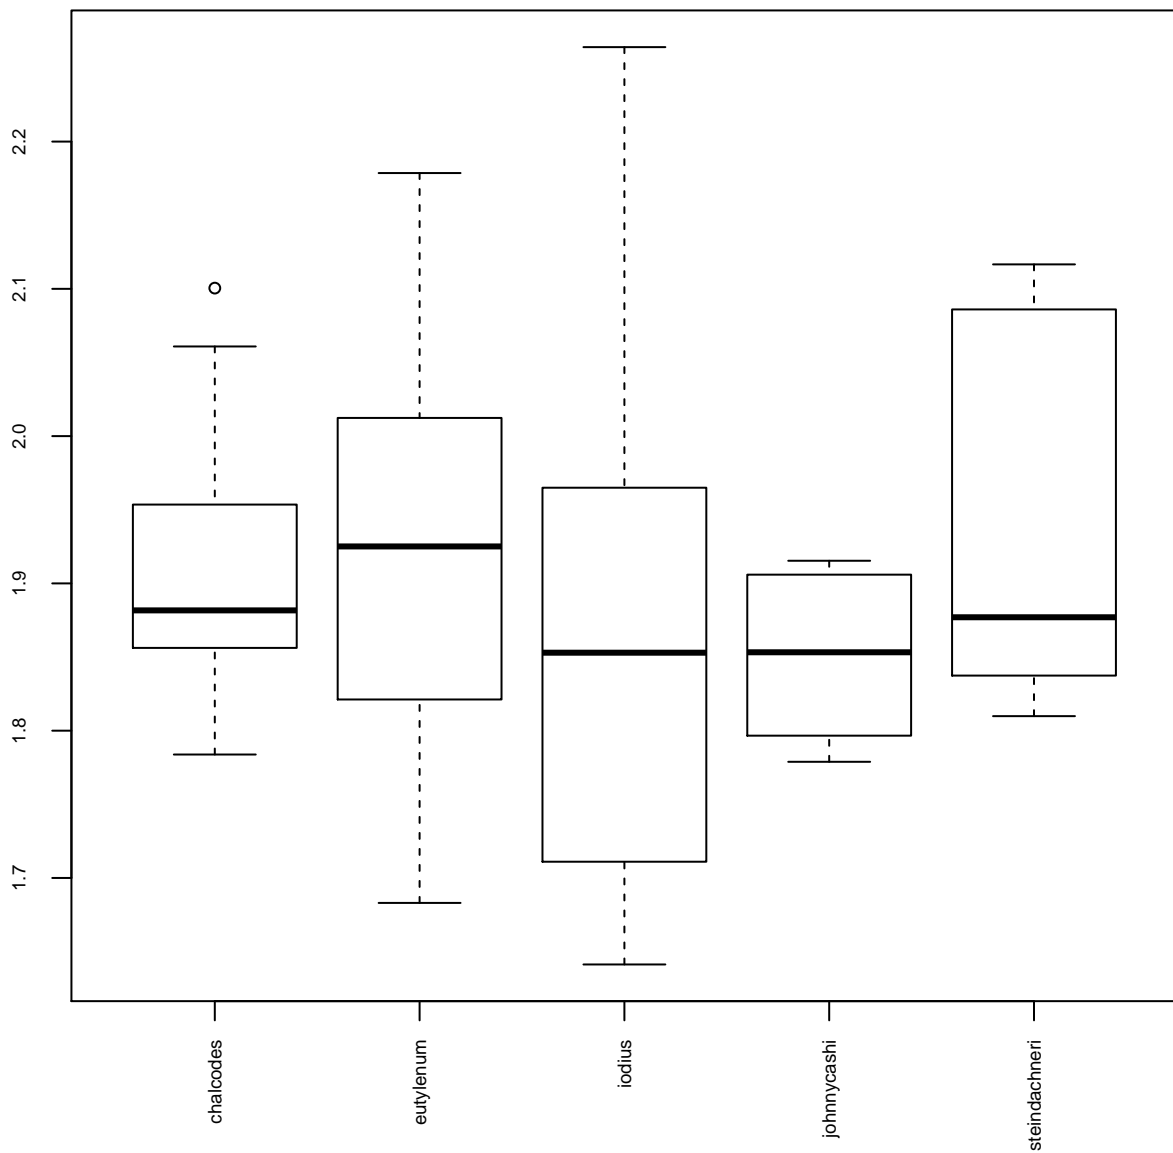

Supplement: Supplementary file 556

## Carapace Length/Tarsus 3 ratio – males

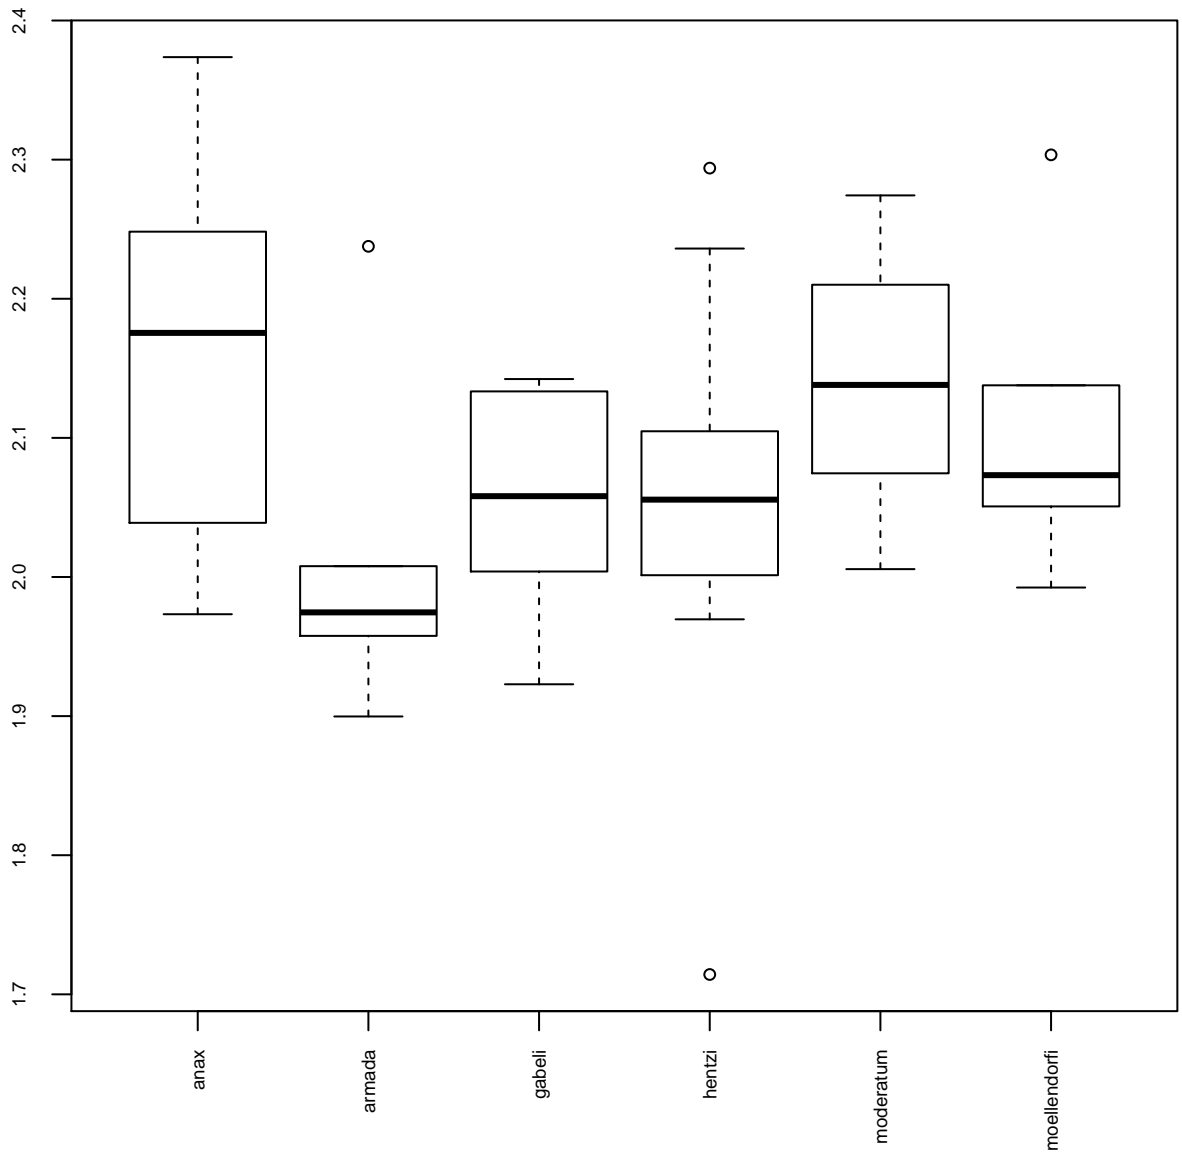

Supplement: Supplementary file 557

## Carapace Length/Tibia 1 ratio – females

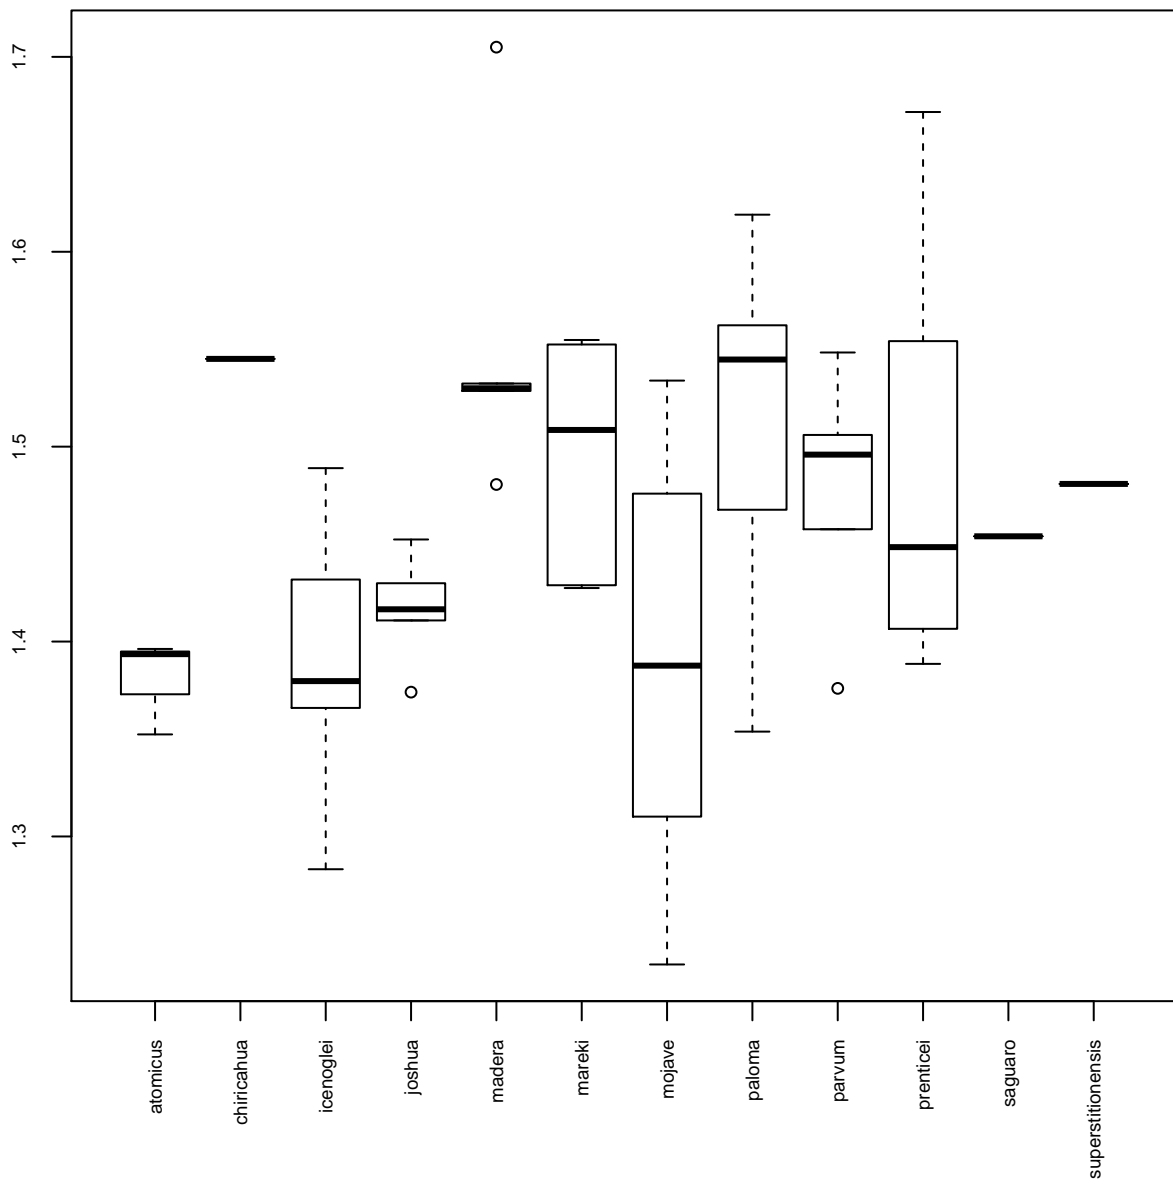

Supplement: Supplementary file 558

## Tarsus 1/Metatarsus 3 Length ratio – males

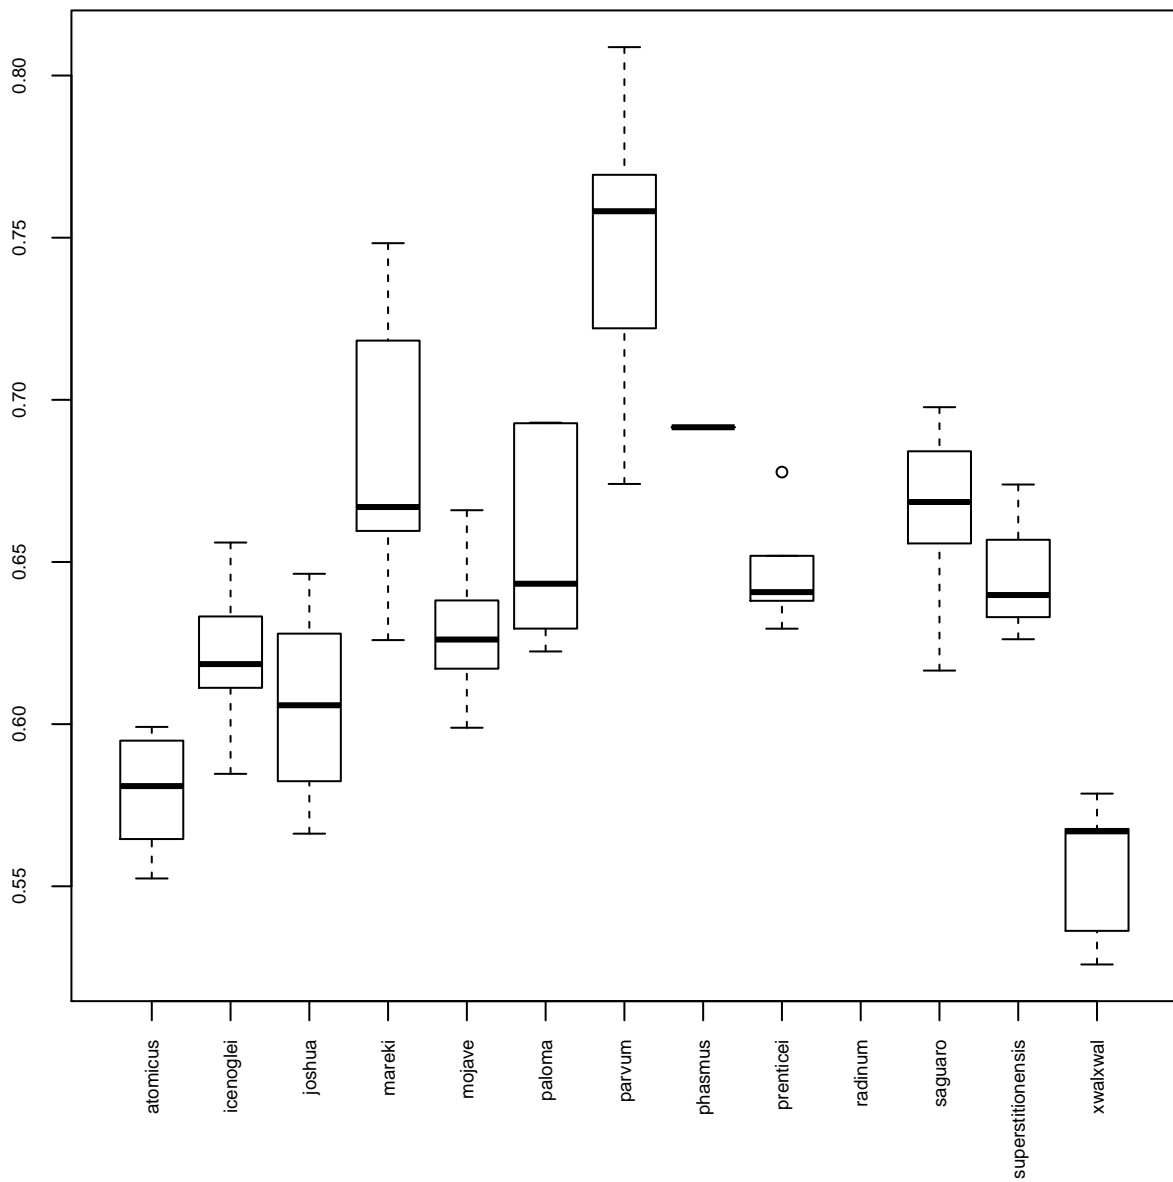

Supplement: Supplementary file 559

## Leg 3 Length/Carapace Length ratio – females

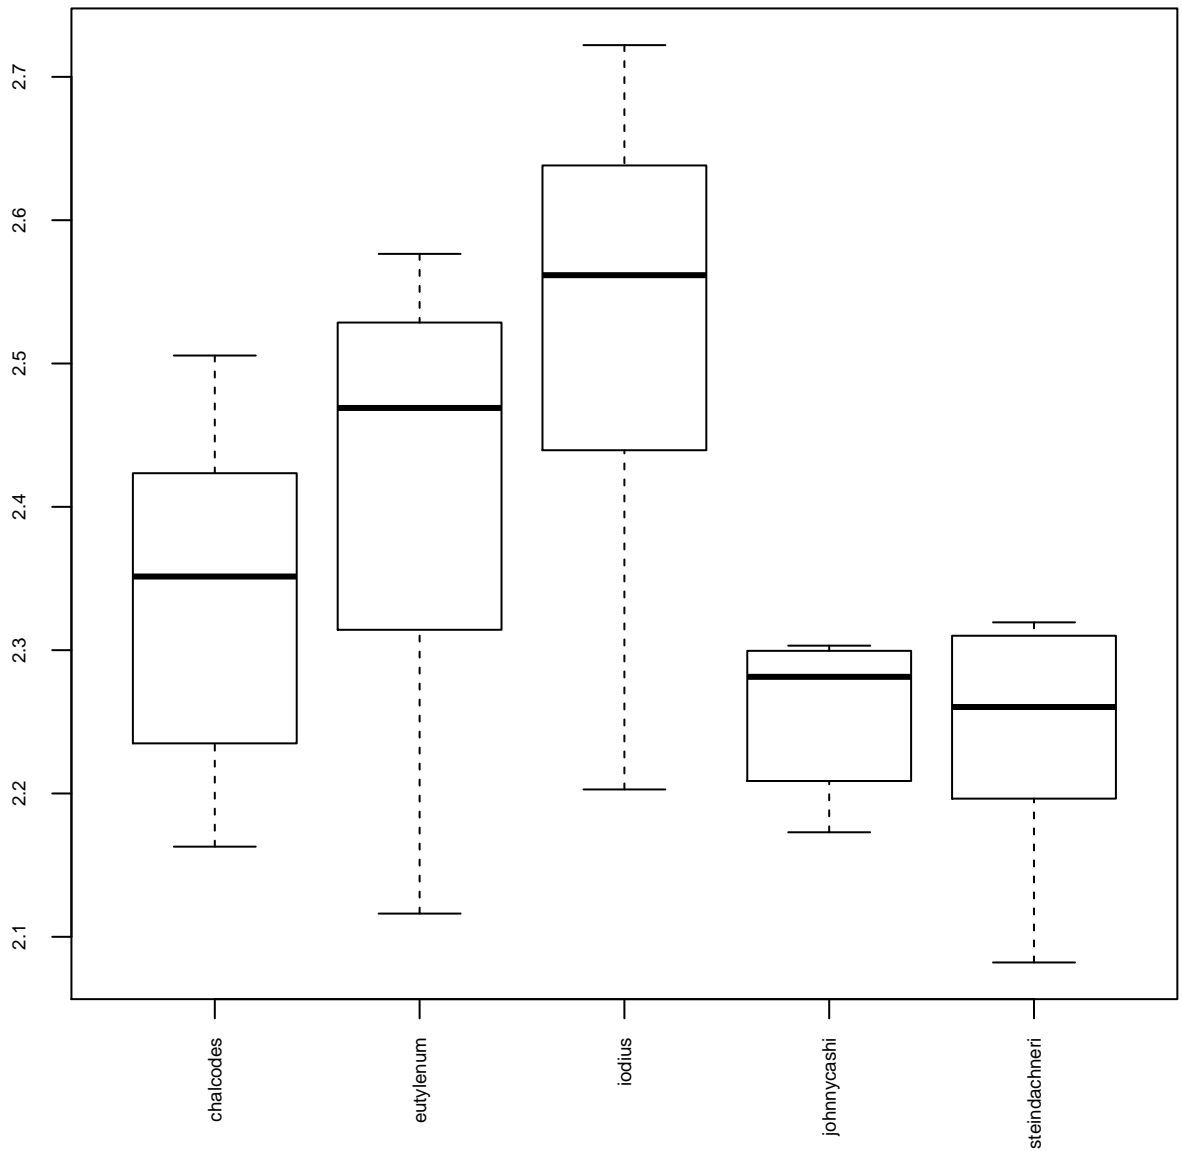

Supplement: Supplementary file 560

## Palpal Tibia/Tarsus 1 Length ratio – males

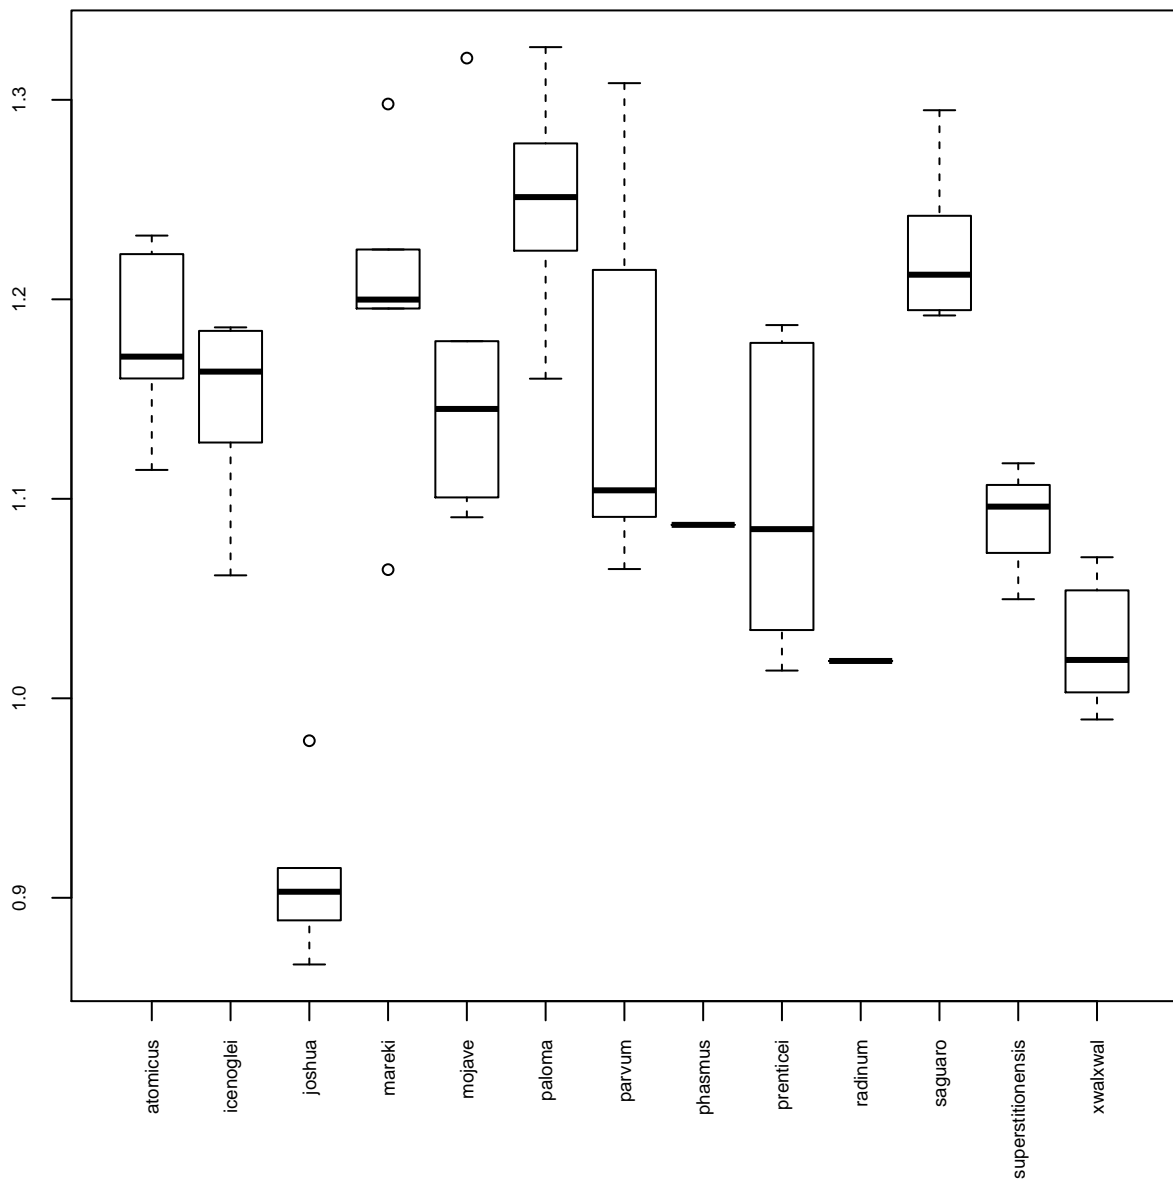

Supplement: Supplementary file 561

## Patella 3/Tarsus 3 ratio – females

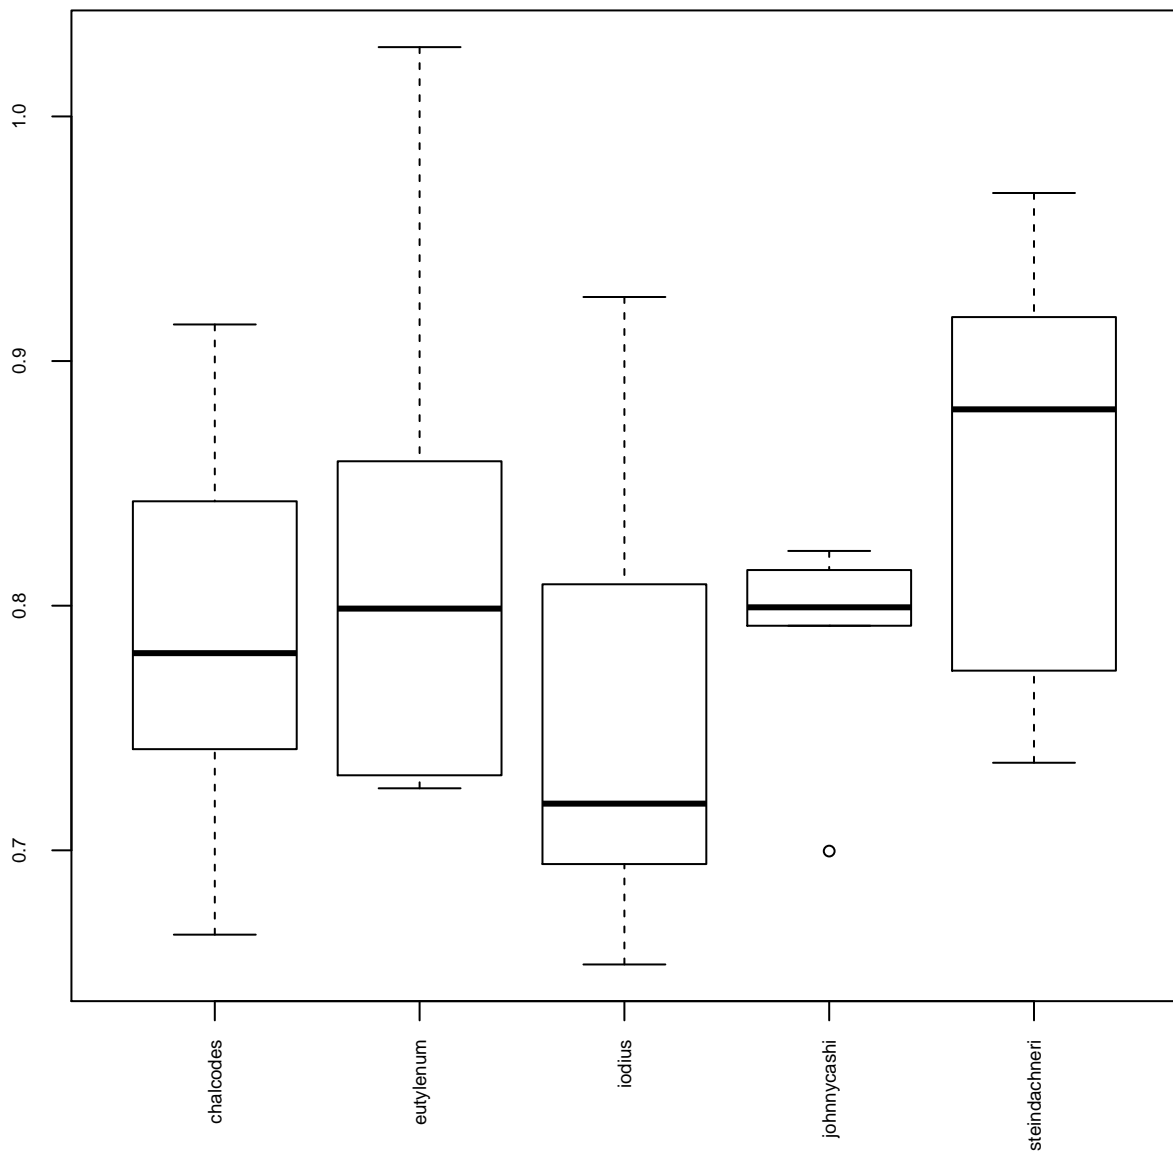

Supplement: Supplementary file 562

# Carapace Length/Metatarsus 4 ratio – females

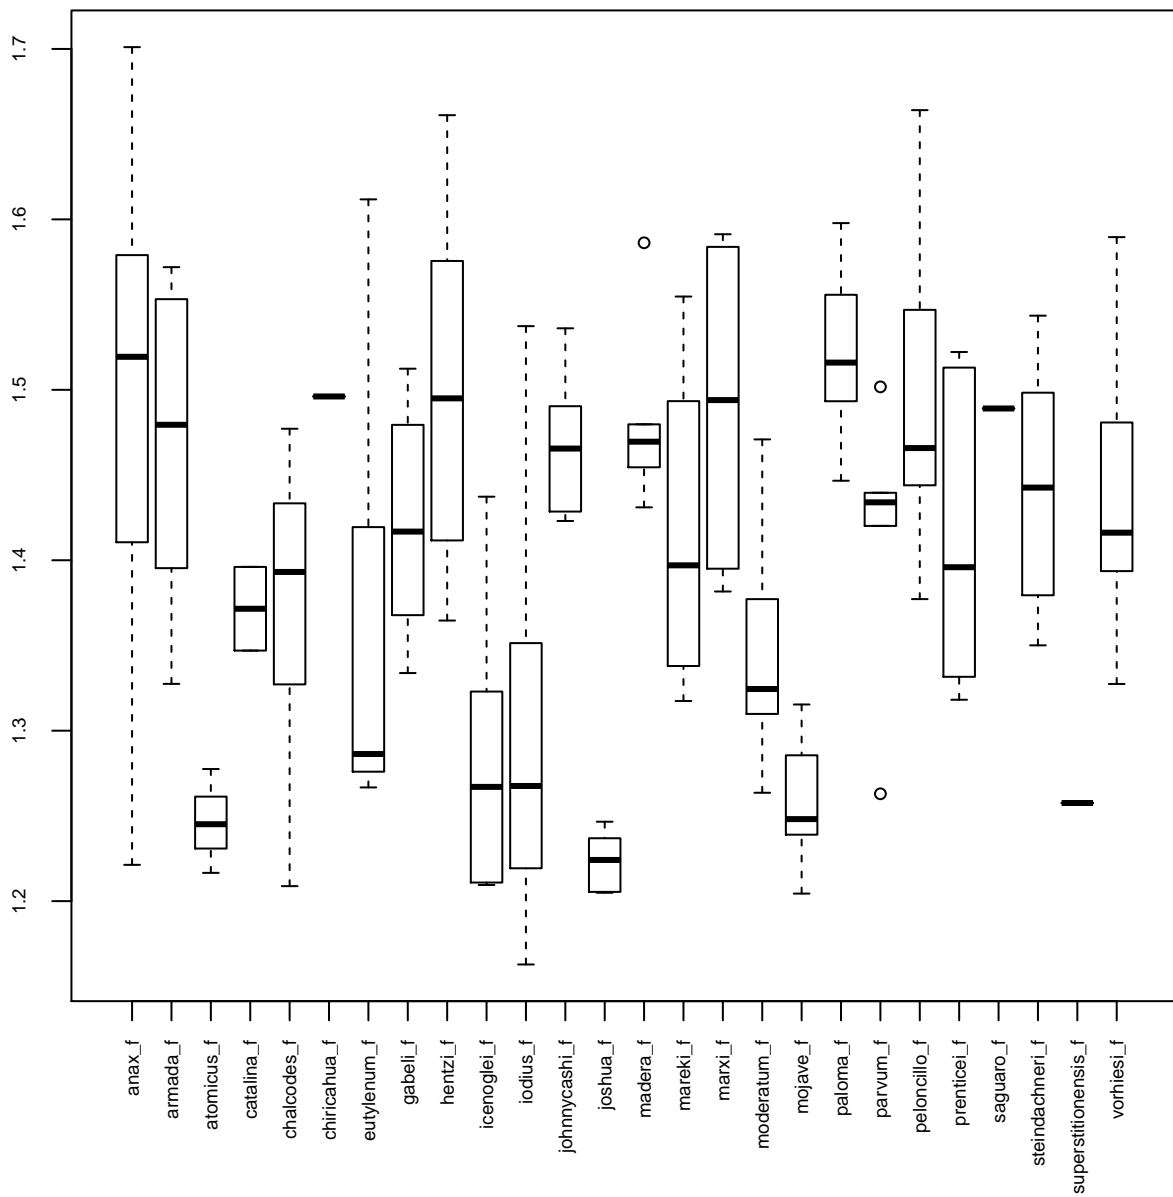

Supplement: Supplementary file 563

## Leg 1 Length – females

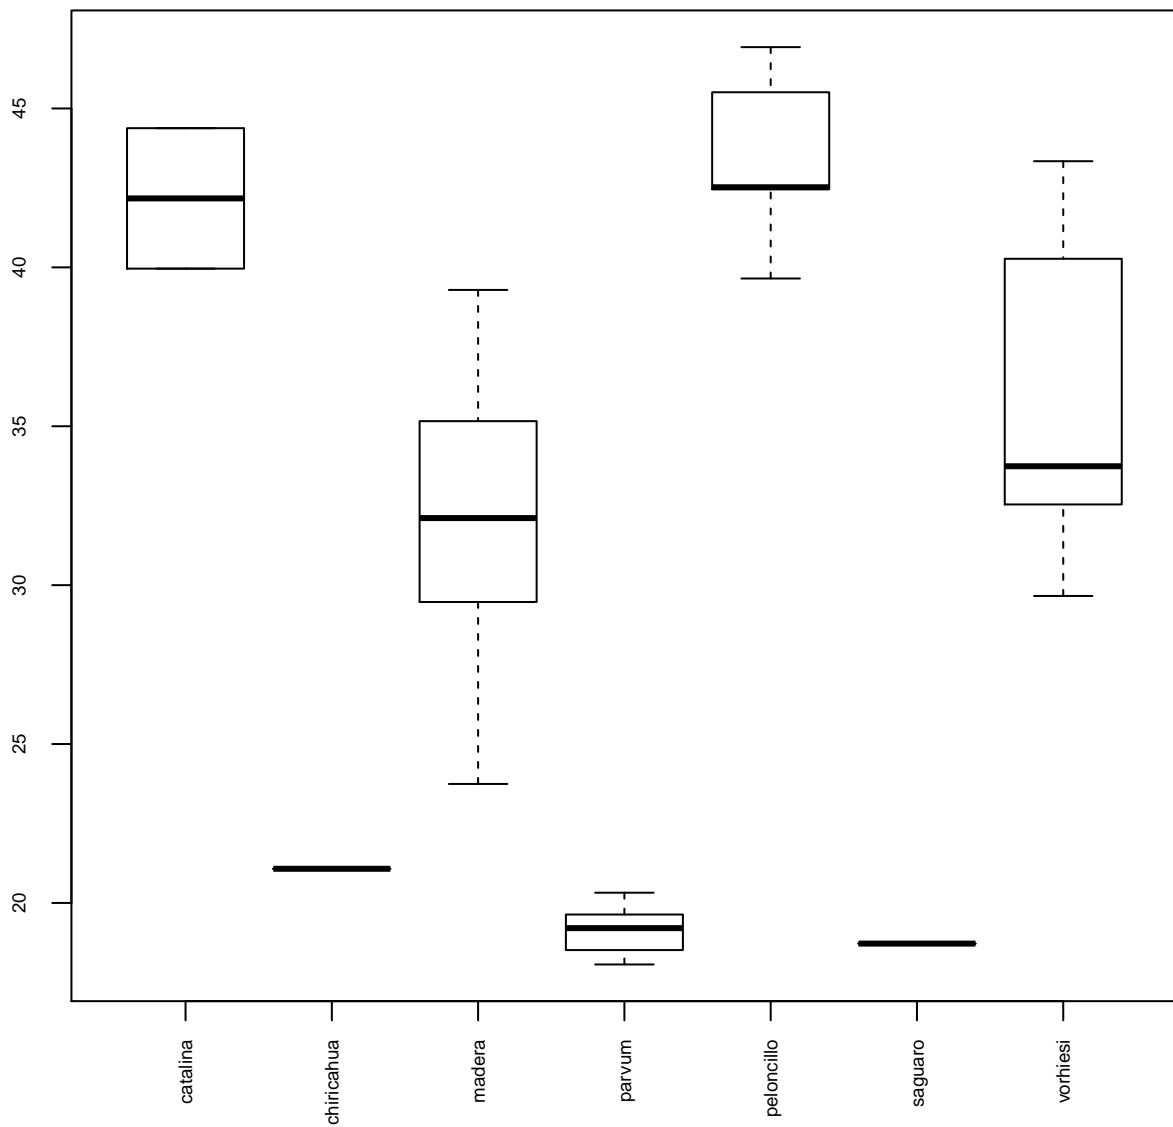

Supplement: Supplementary file 564

## Leg 4 Length – females

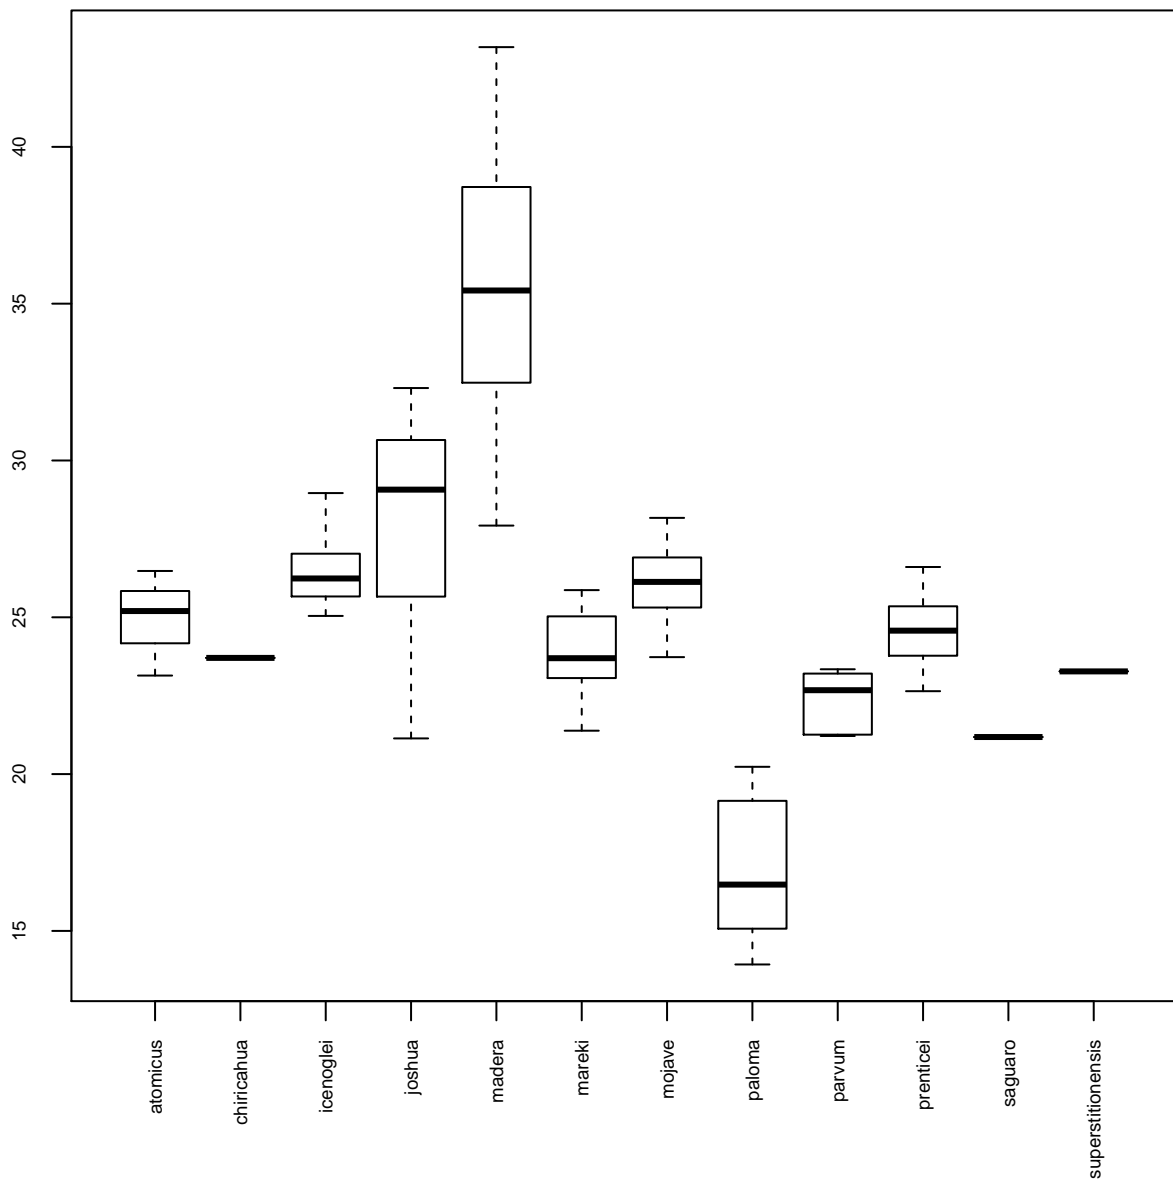

Supplement: Supplementary file 565

## Femur 3/Metatarsus 4 Length ratio – females

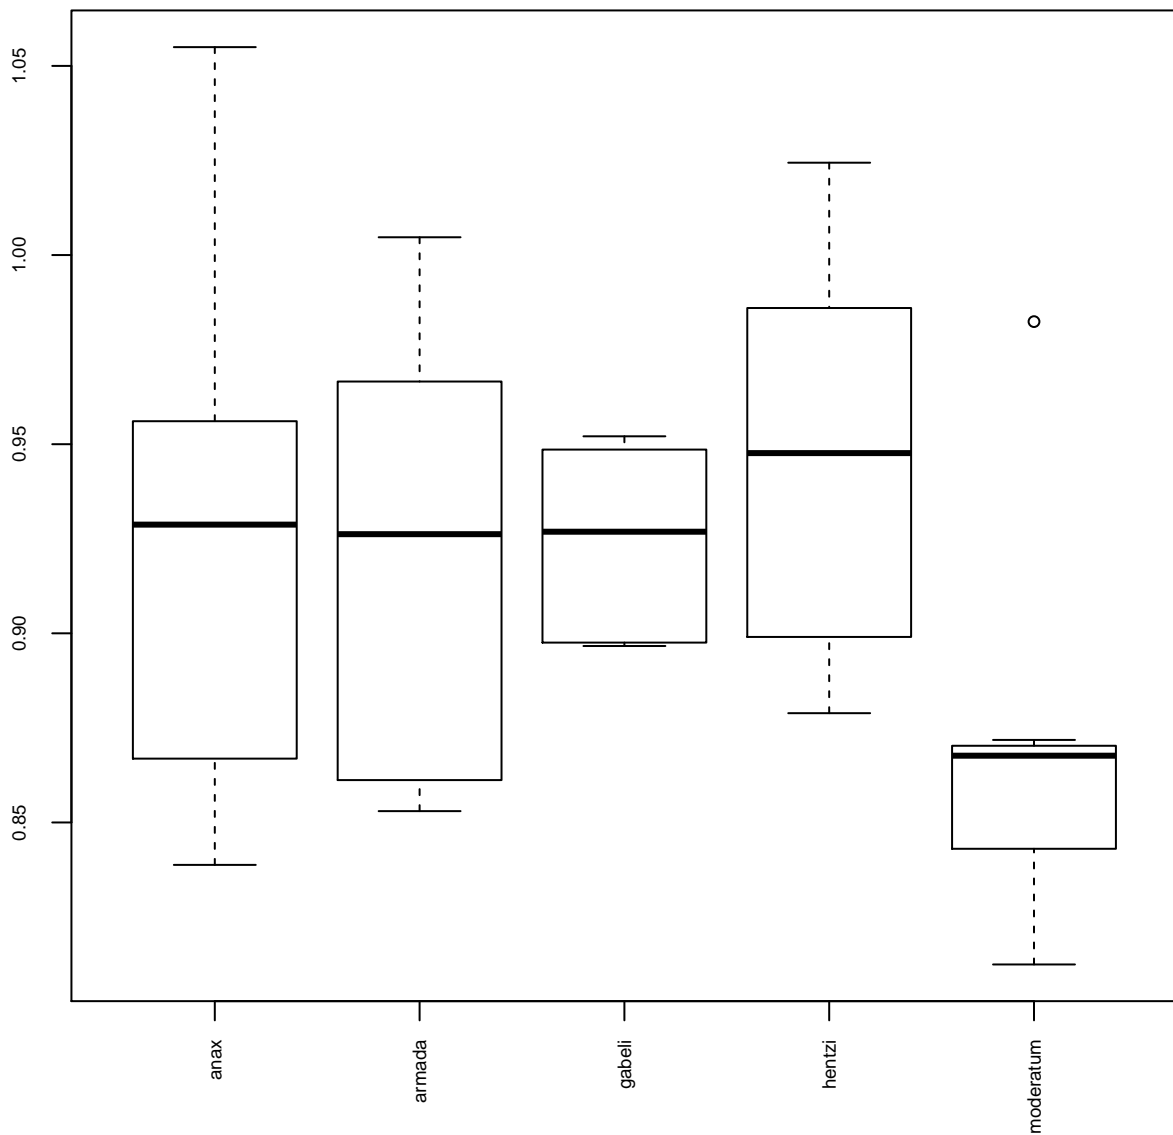

Supplement: Supplementary file 566

## Patella 3/Tibia 4 Length ratio – females

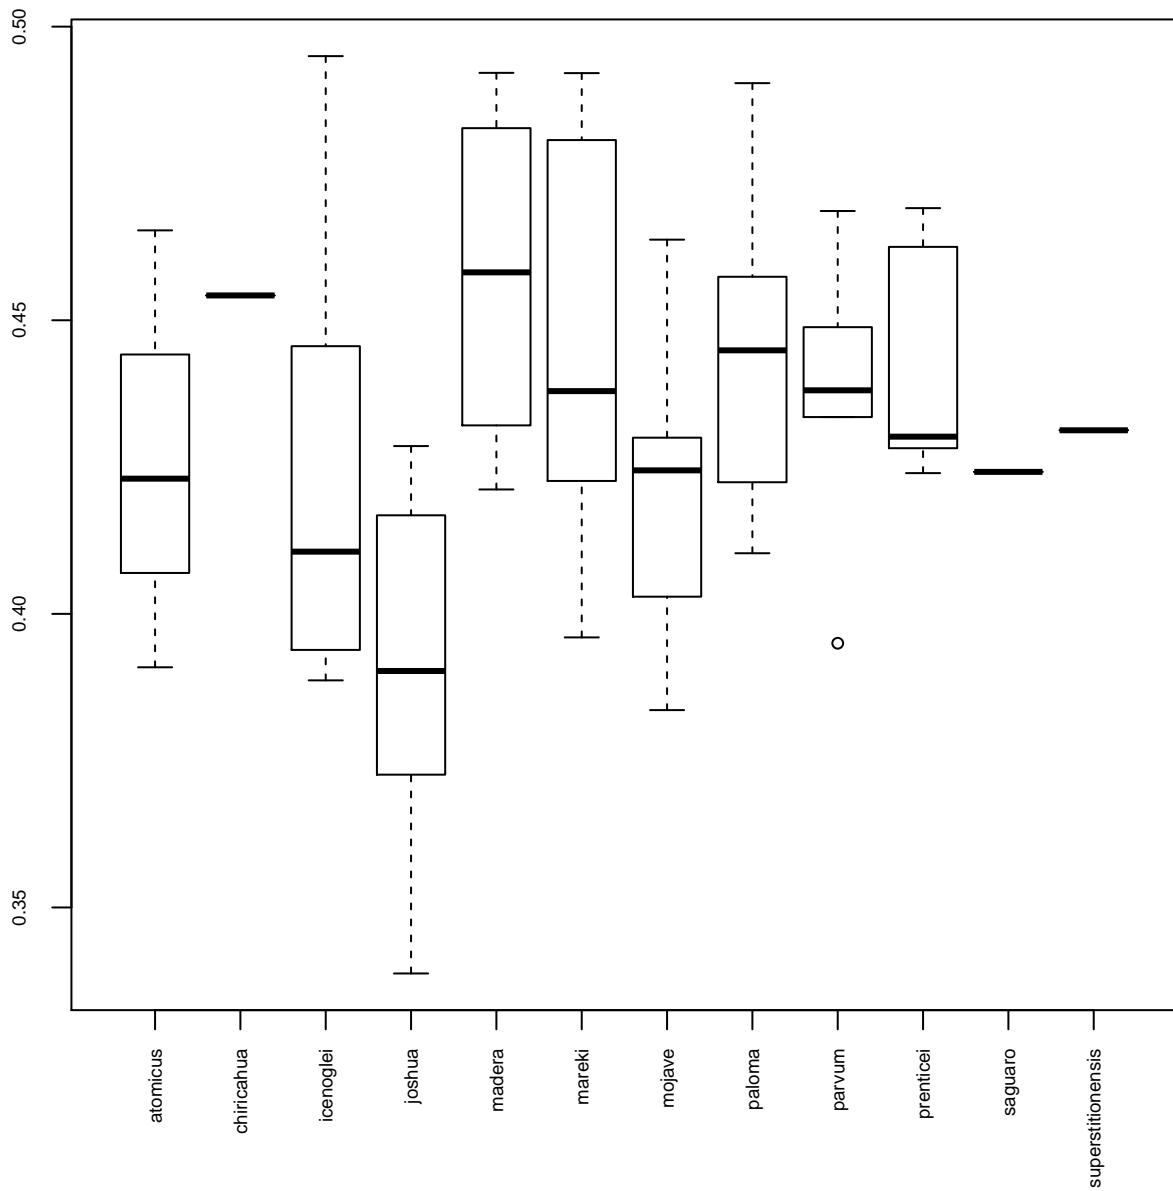

Supplement: Supplementary file 567

## Metatarsus 1/Tibia 4 Length ratio – females

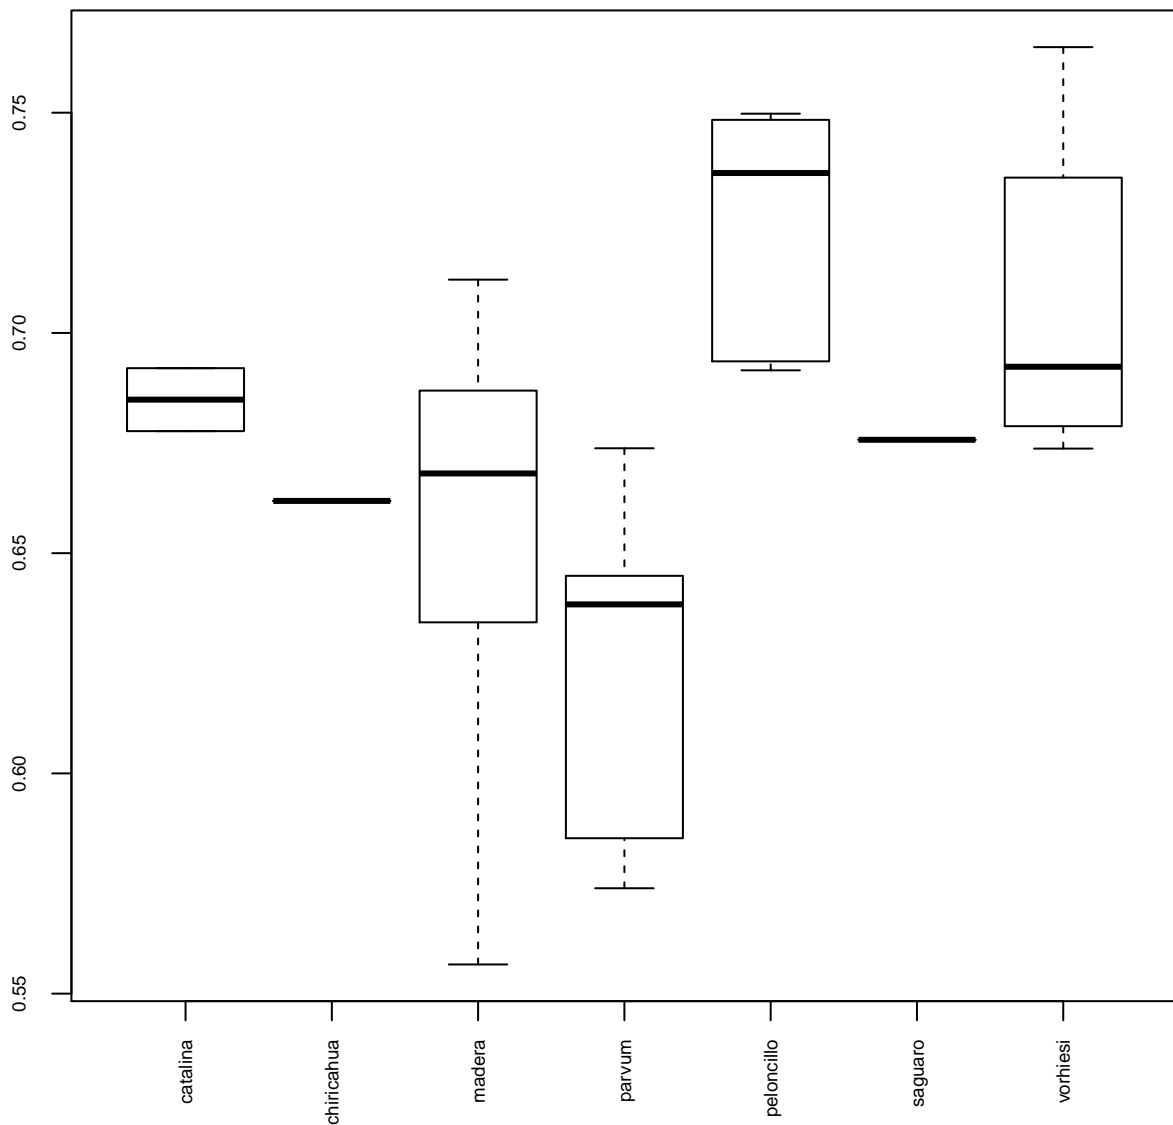

Supplement: Supplementary file 568

## Palpal Tibia/Tibia 3 Length ratio – males

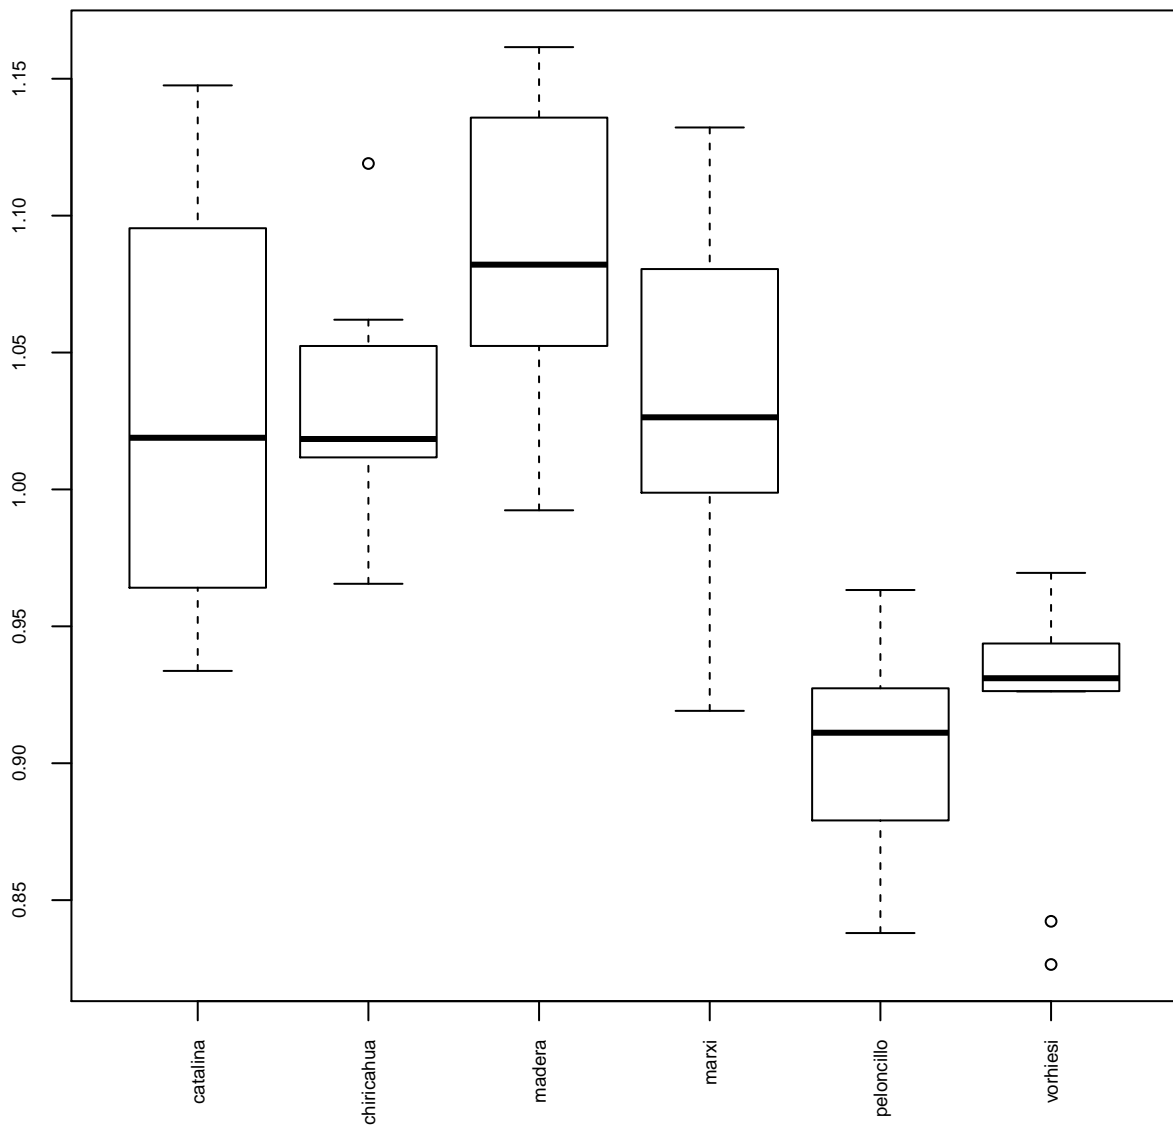

Supplement: Supplementary file 569

## Femur 1/Metatarsus 4 ratio – males

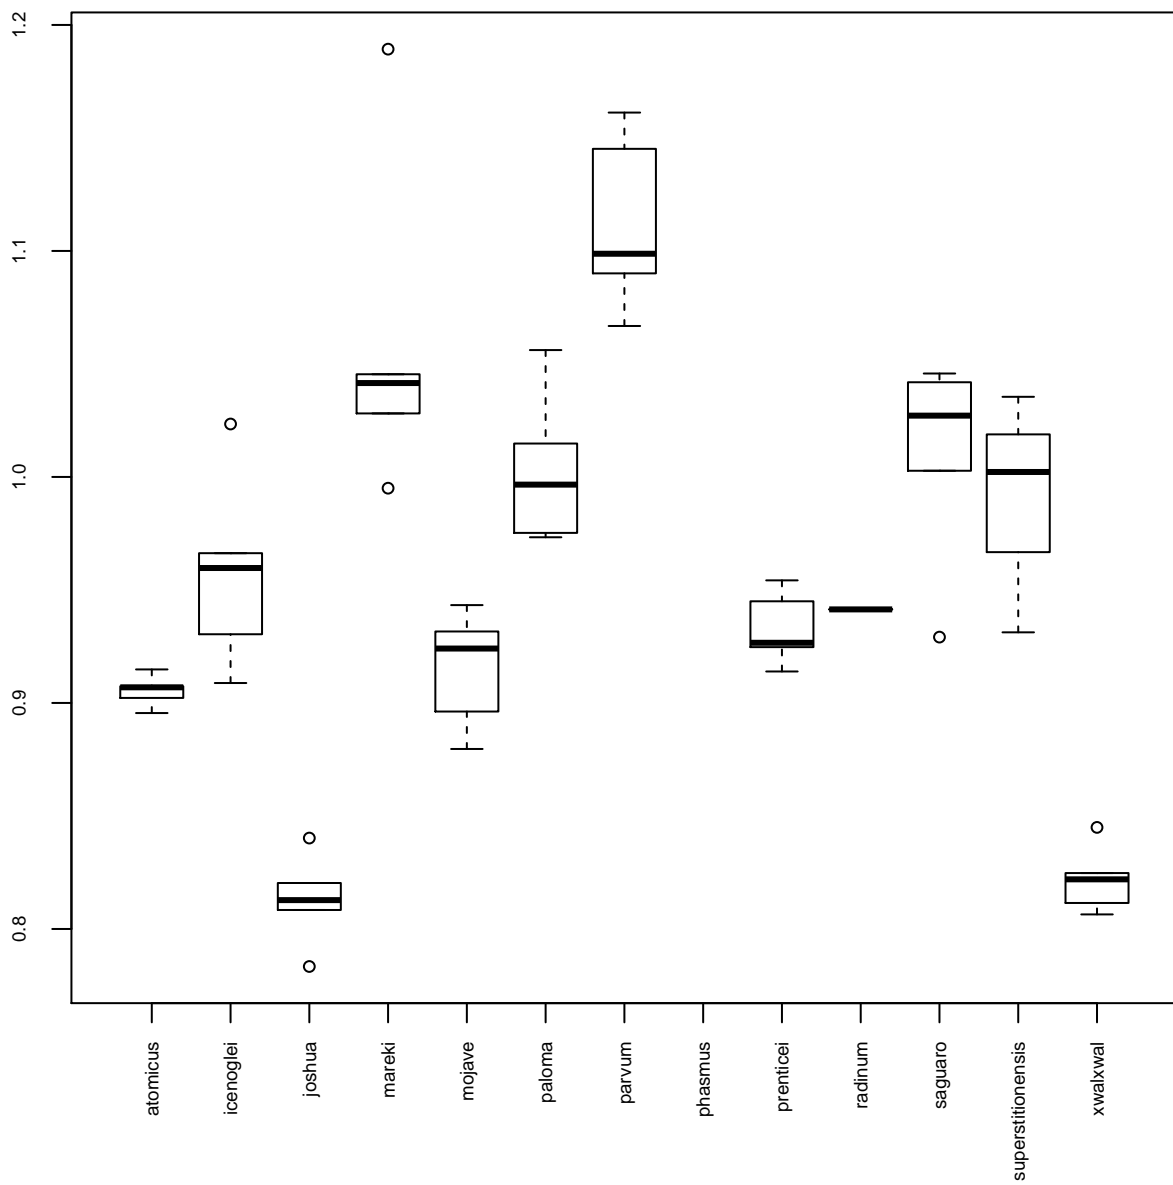

Supplement: Supplementary file 570

## Palpal Tibia/Femur 3 Length ratio – males

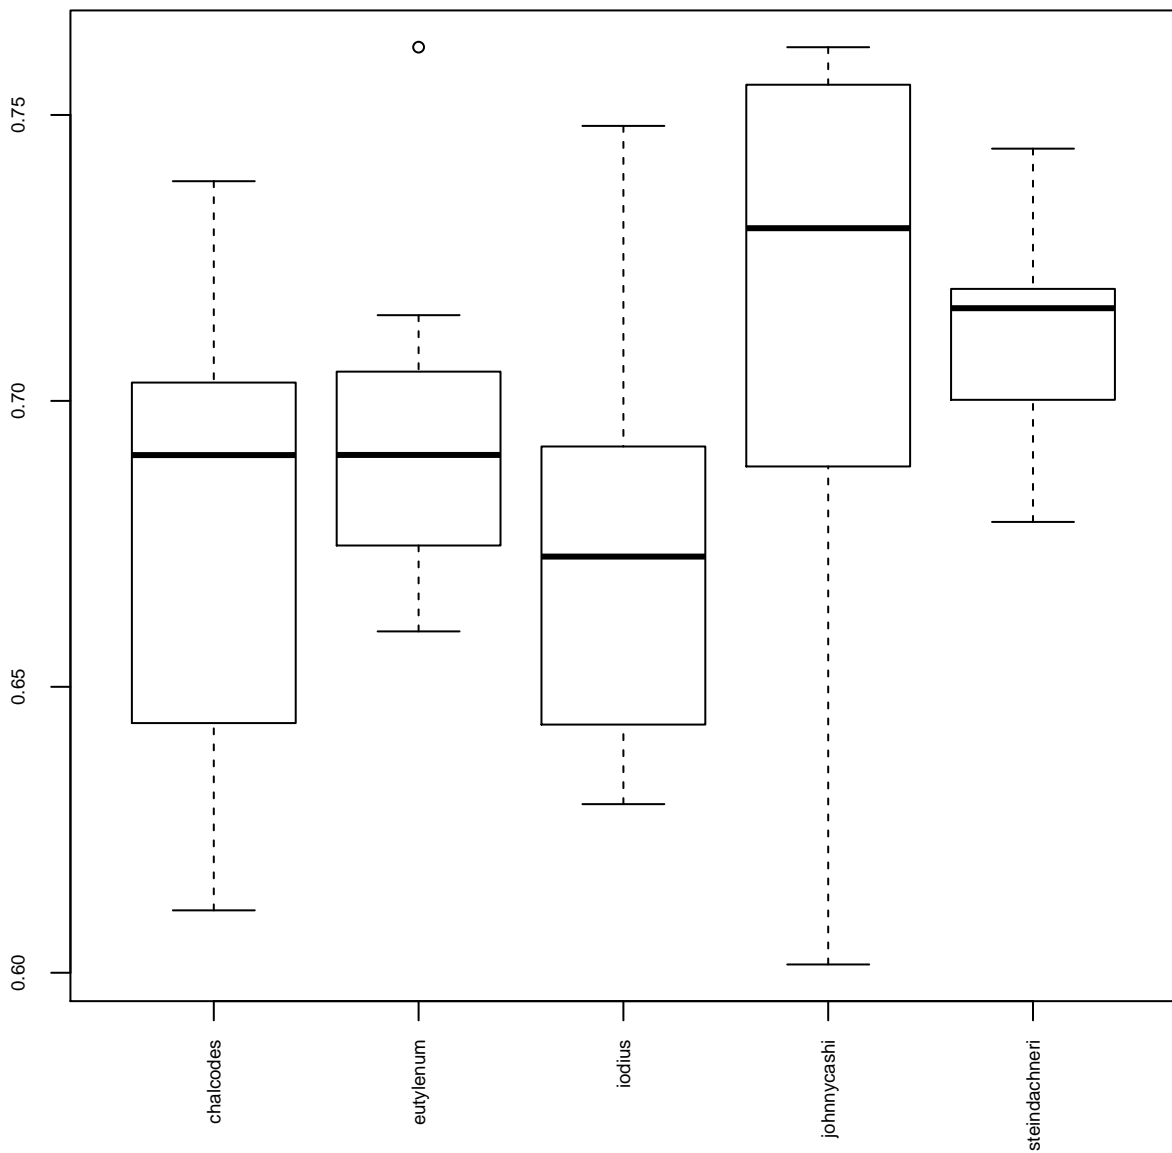

Supplement: Supplementary file 571

## Tibia 1/Femur 3 Length ratio – females

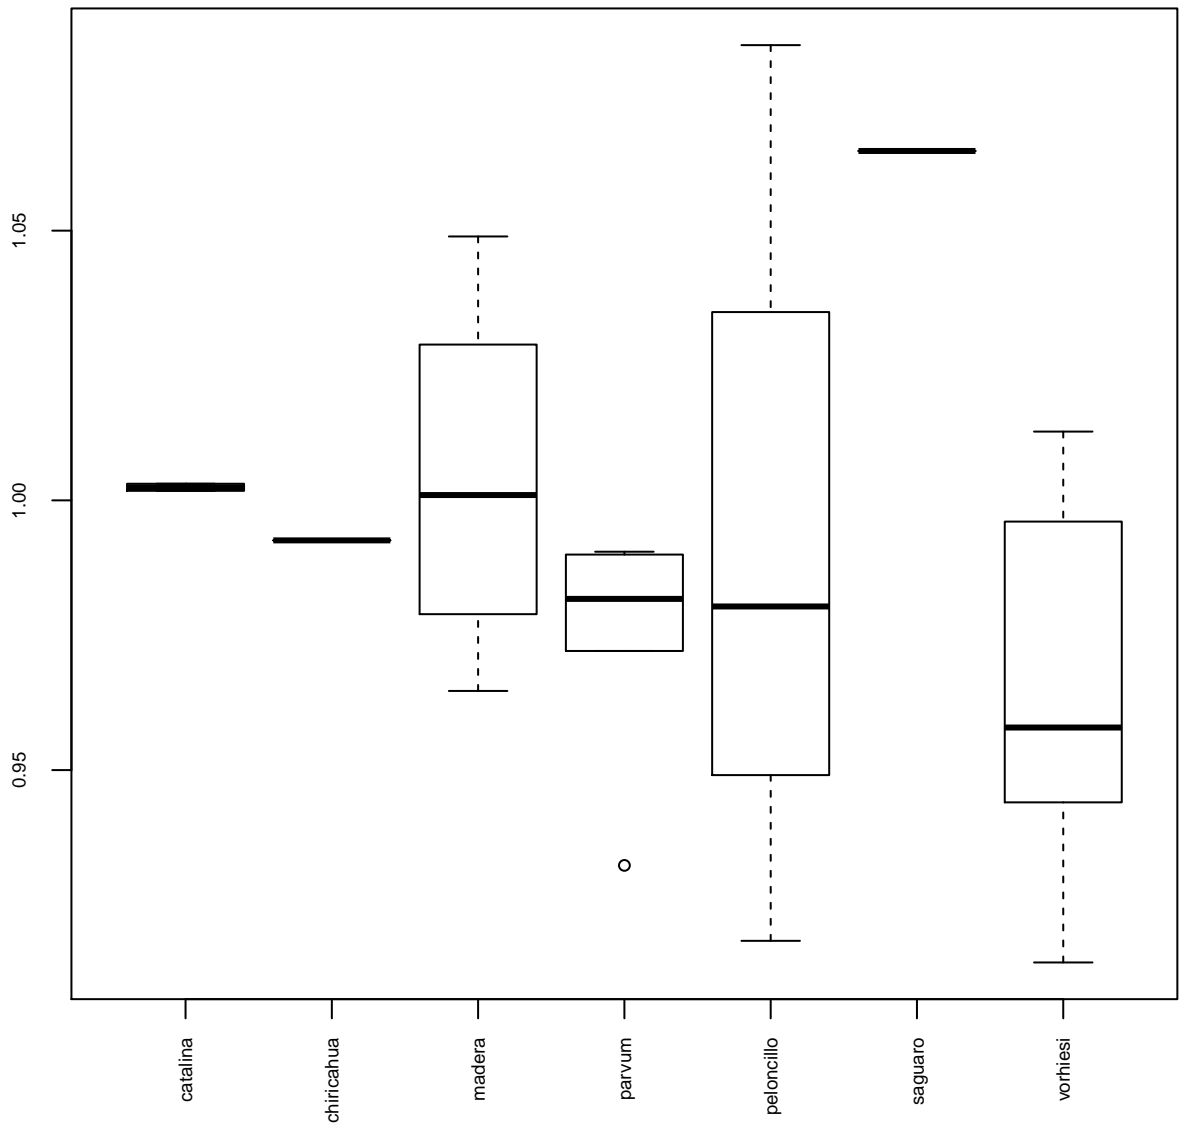

Supplement: Supplementary file 572

Palpal Tibia/Tarsus 3 Length ratio – males

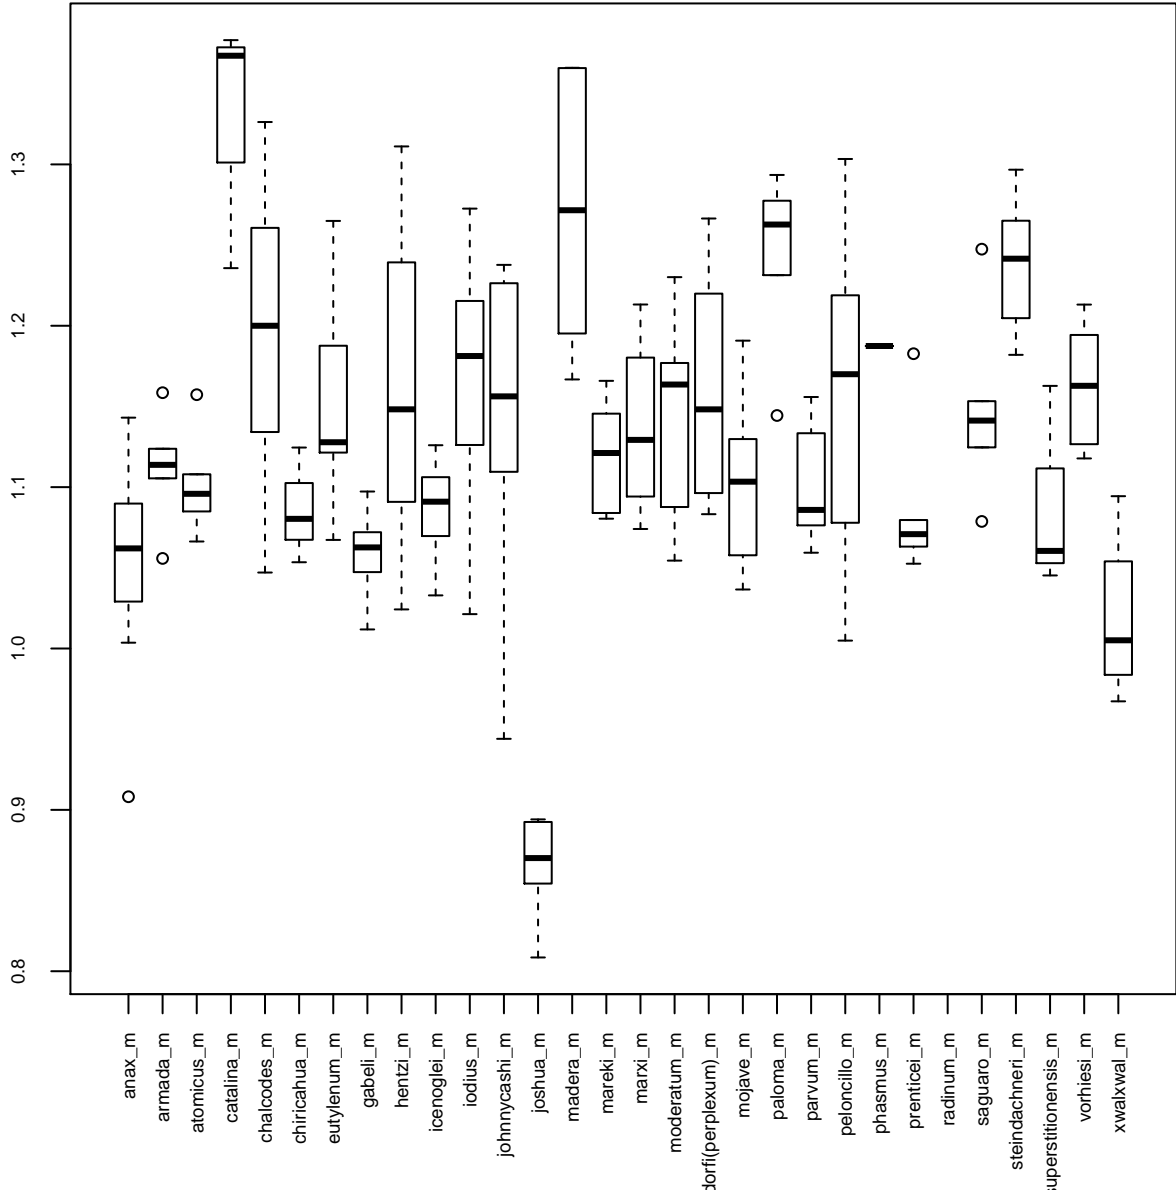

Supplement: Supplementary file 573

# Tibia 3/Metatarsus 4 Length ratio – males

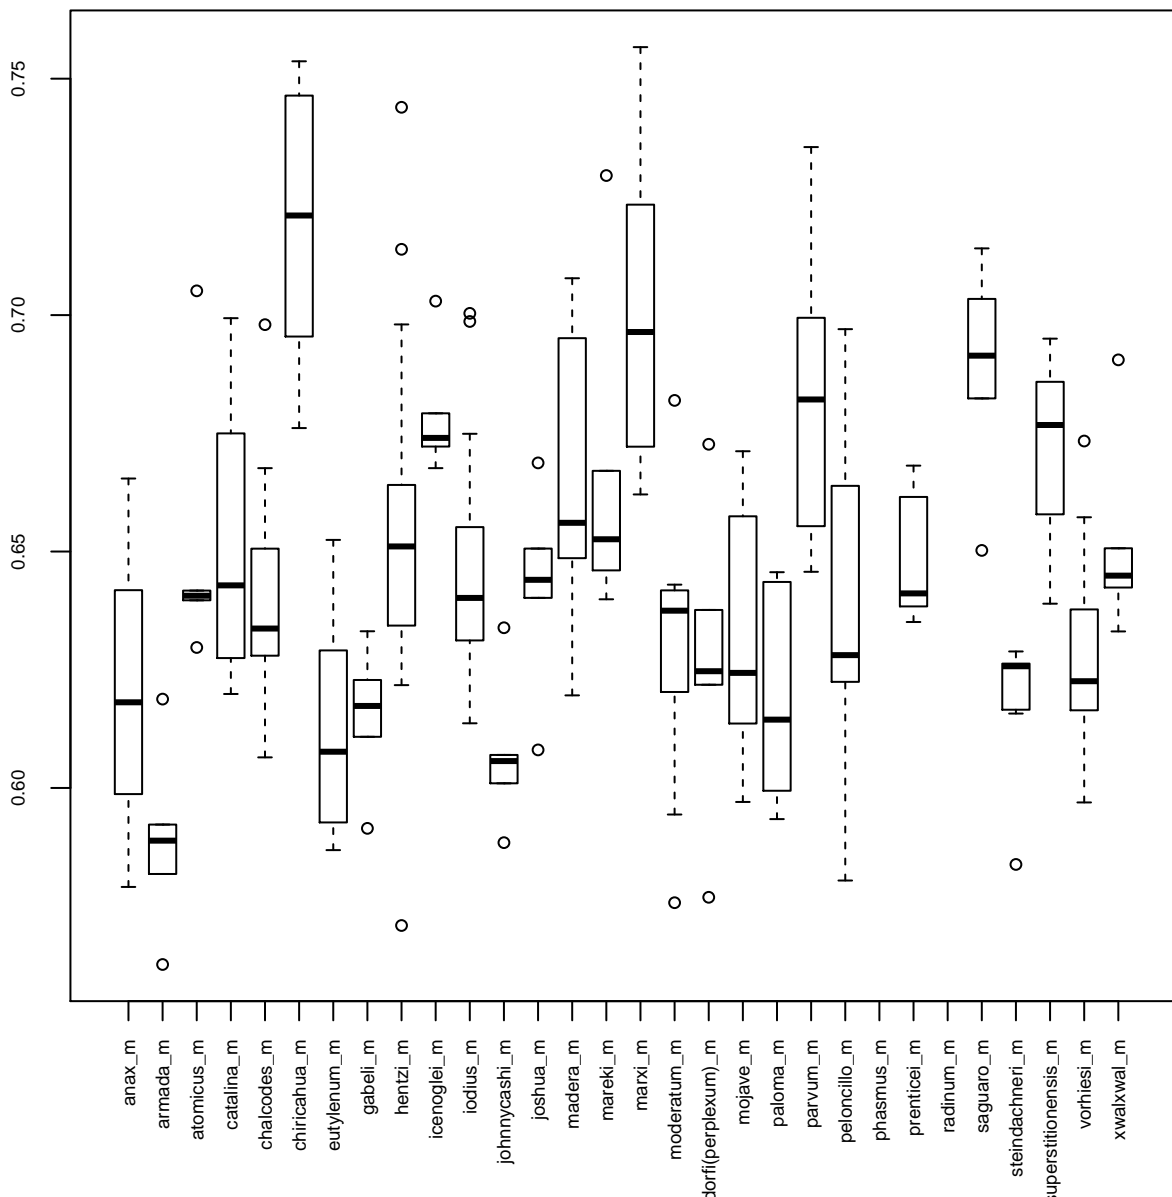

Supplement: Supplementary file 574

## Femur 3/Tibia 4 Length ratio – females

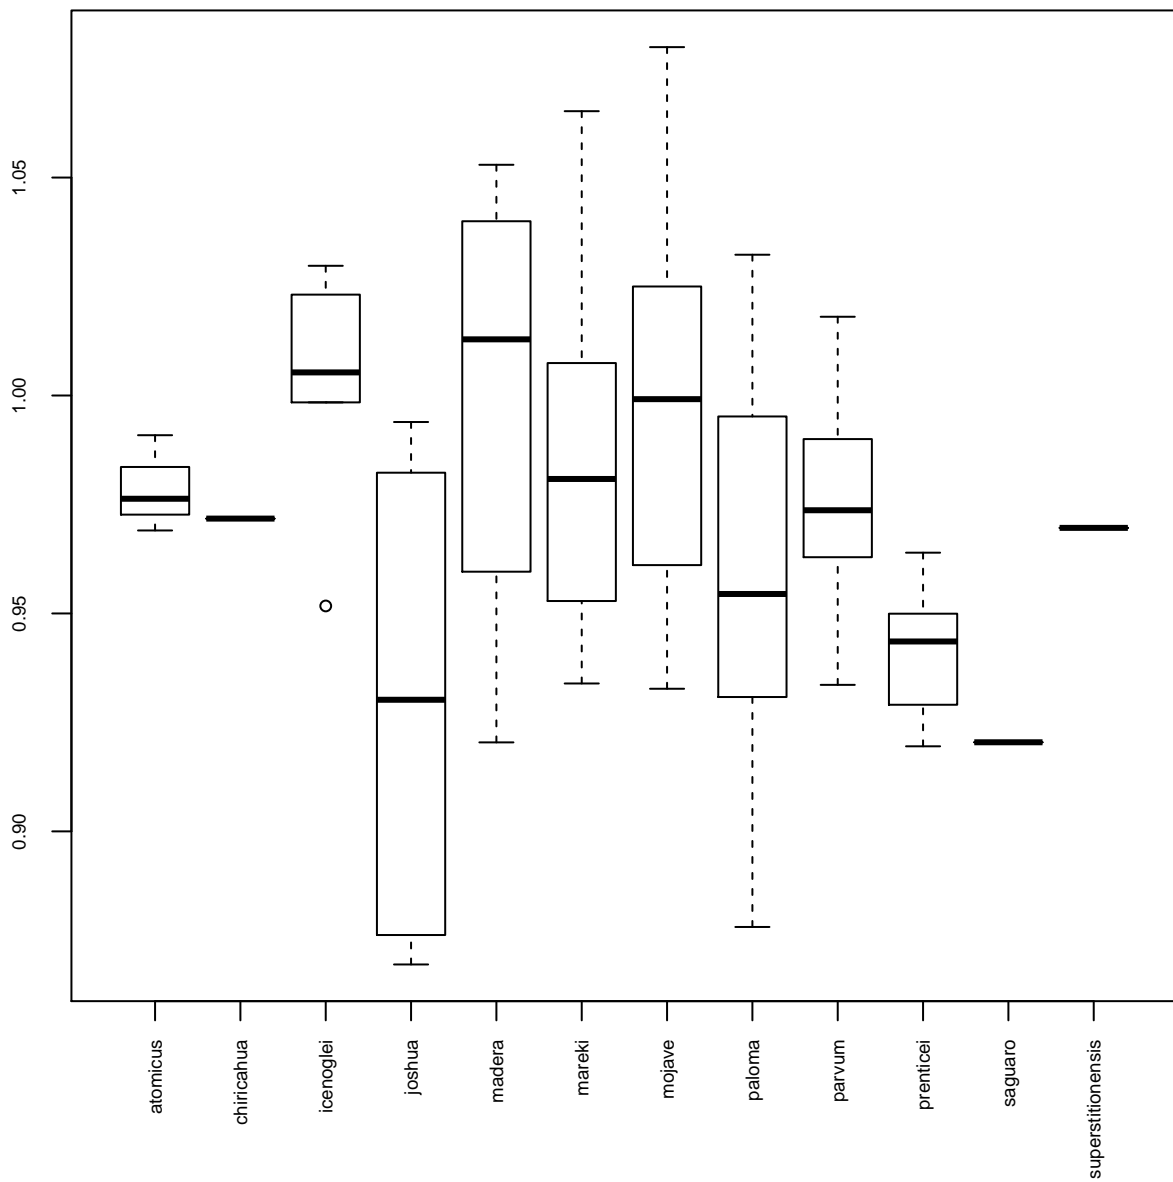

Supplement: Supplementary file 575

## Metatarsus 1/Metatarsus 3 ratio – males

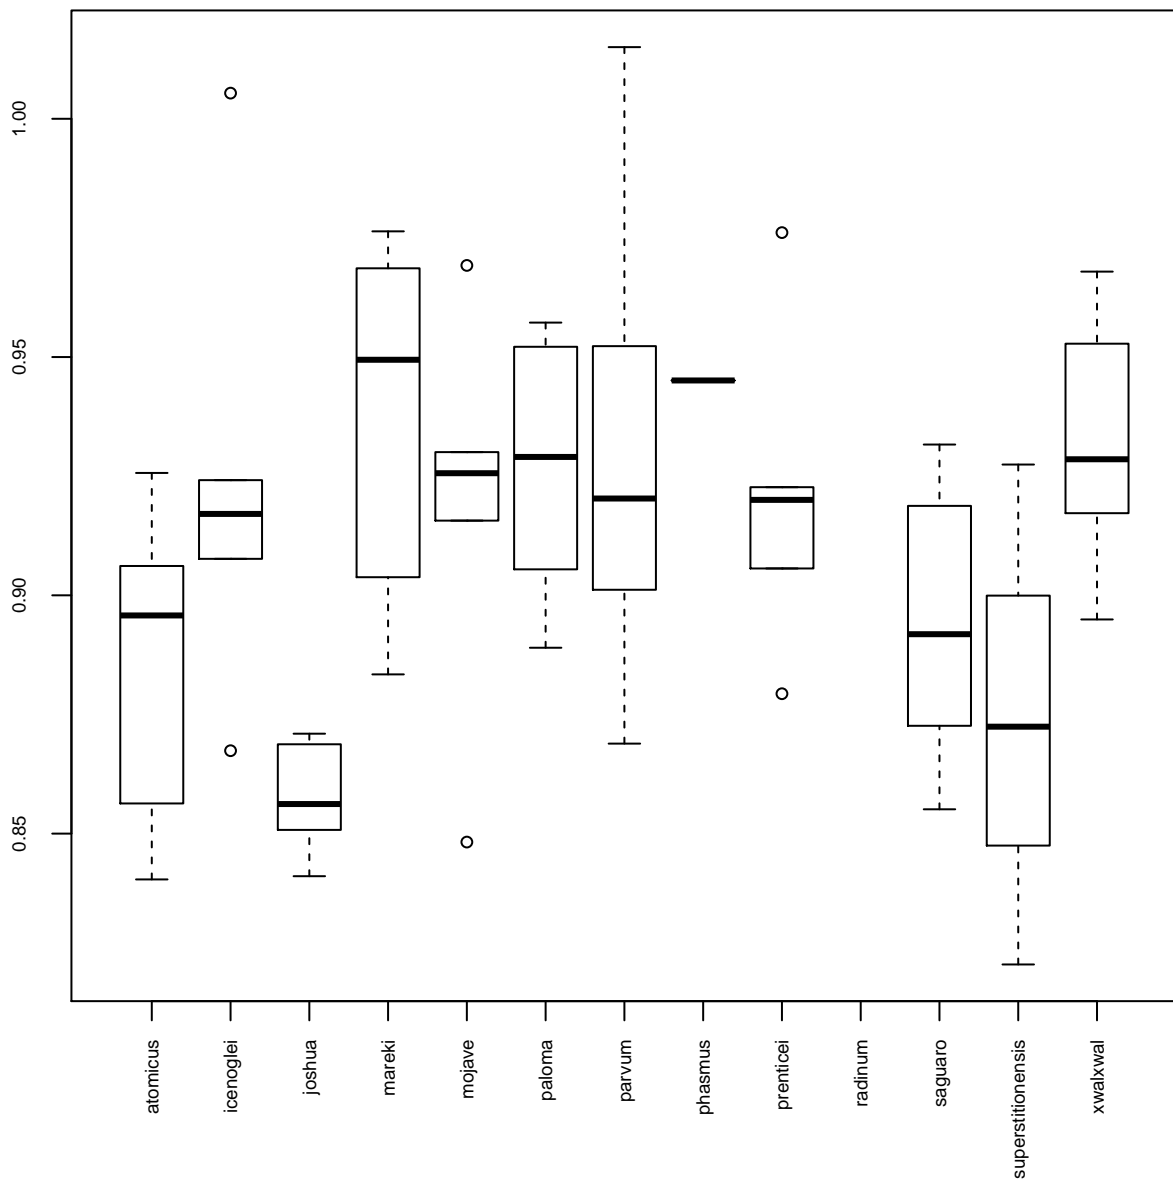

Supplement: Supplementary file 576

## Leg 3 Scopulation ratio – females

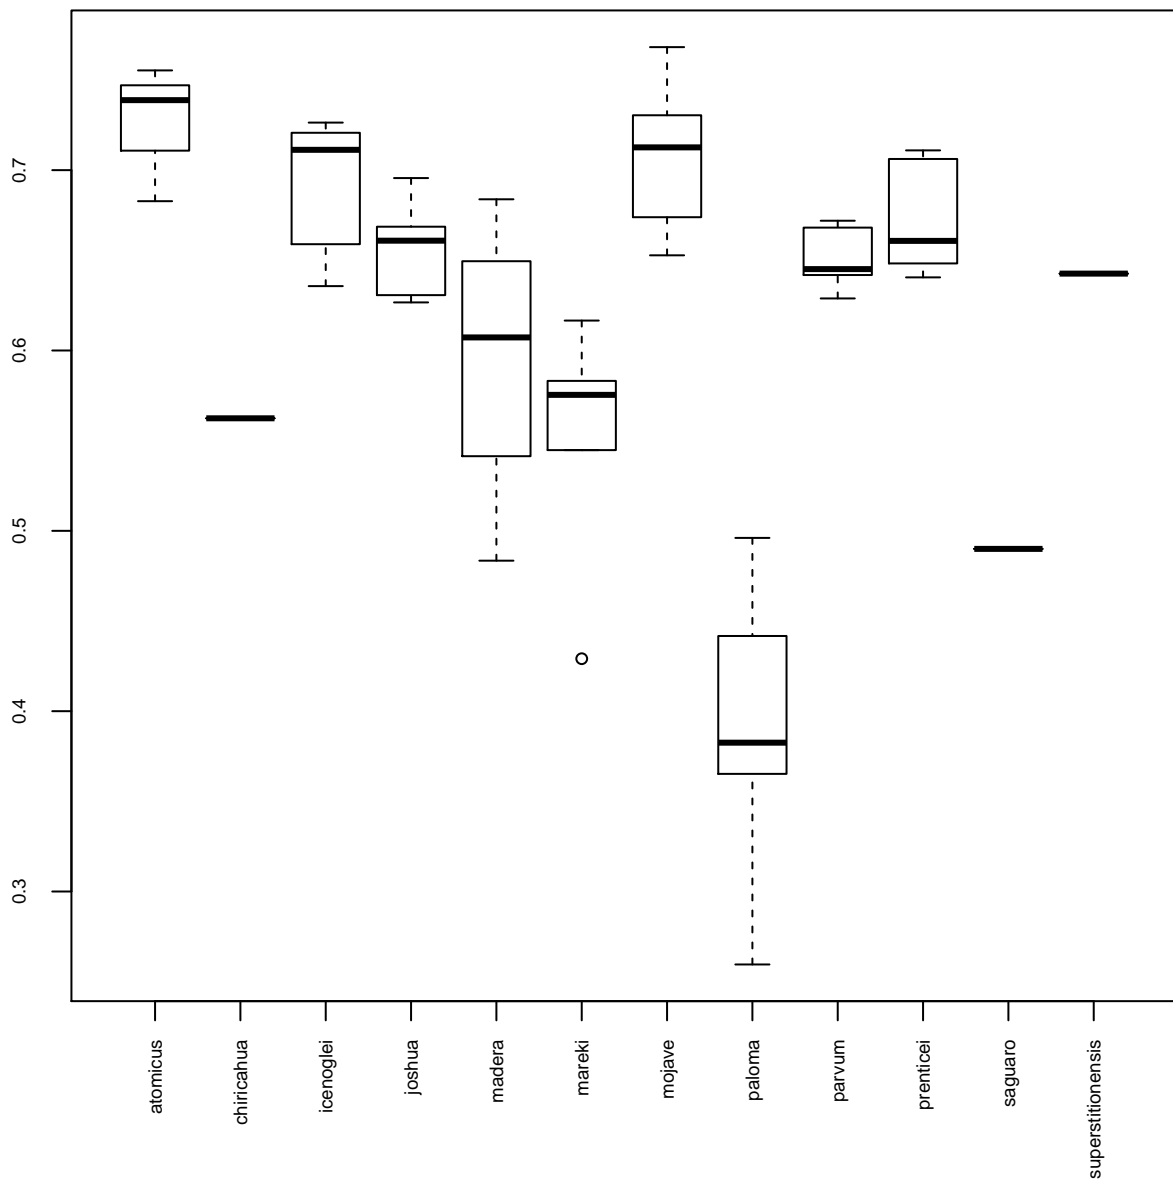

Supplement: Supplementary file 577

## Leg 4 Length/Carapace Length ratio – females

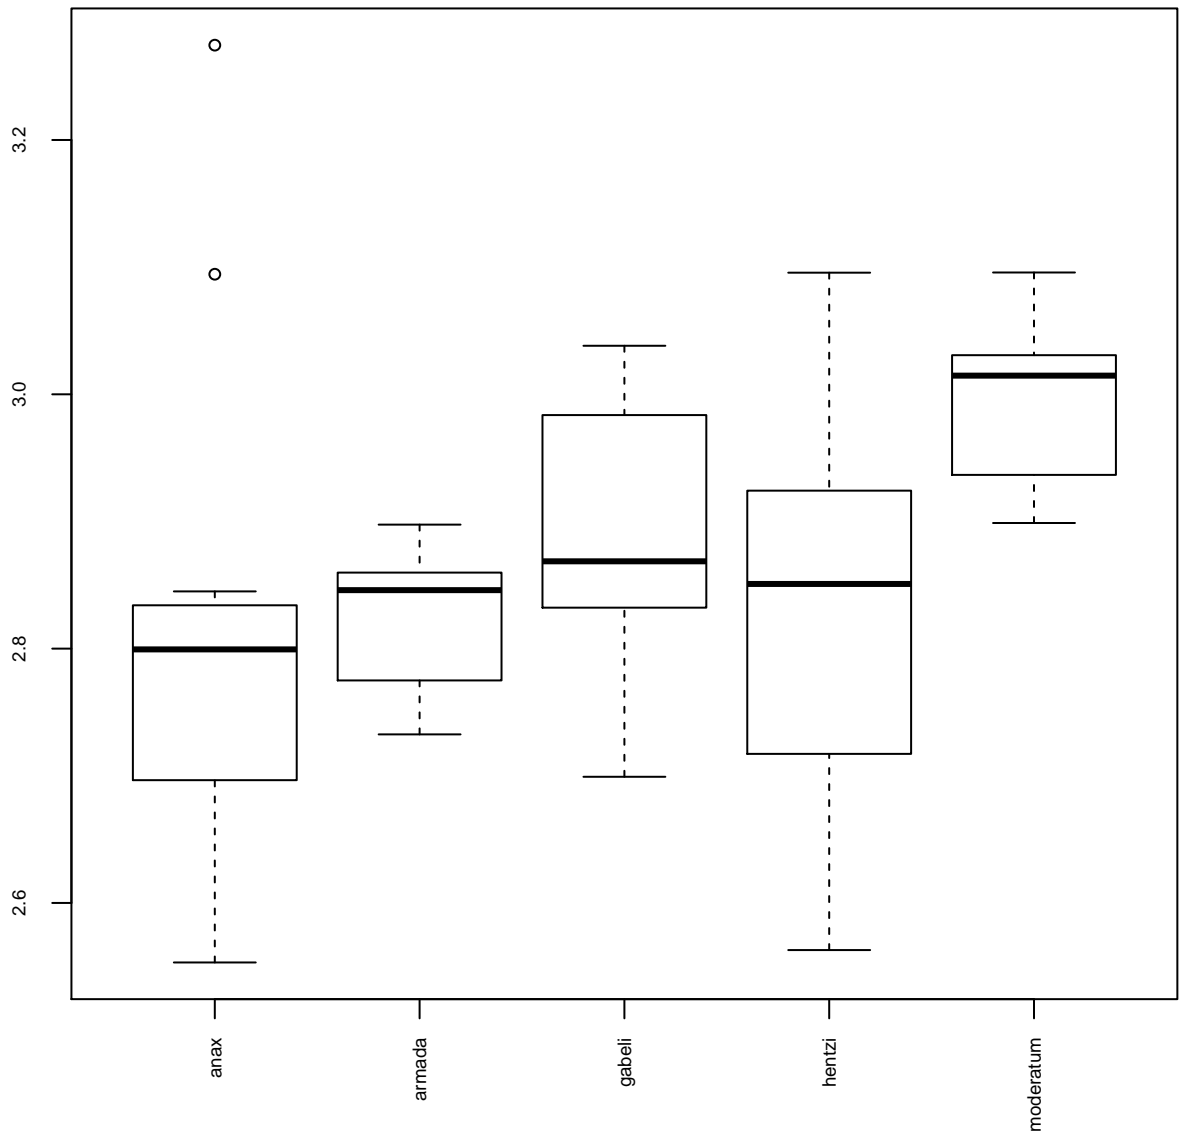

Supplement: Supplementary file 578

# Carapace Length/Femur 1 ratio – males

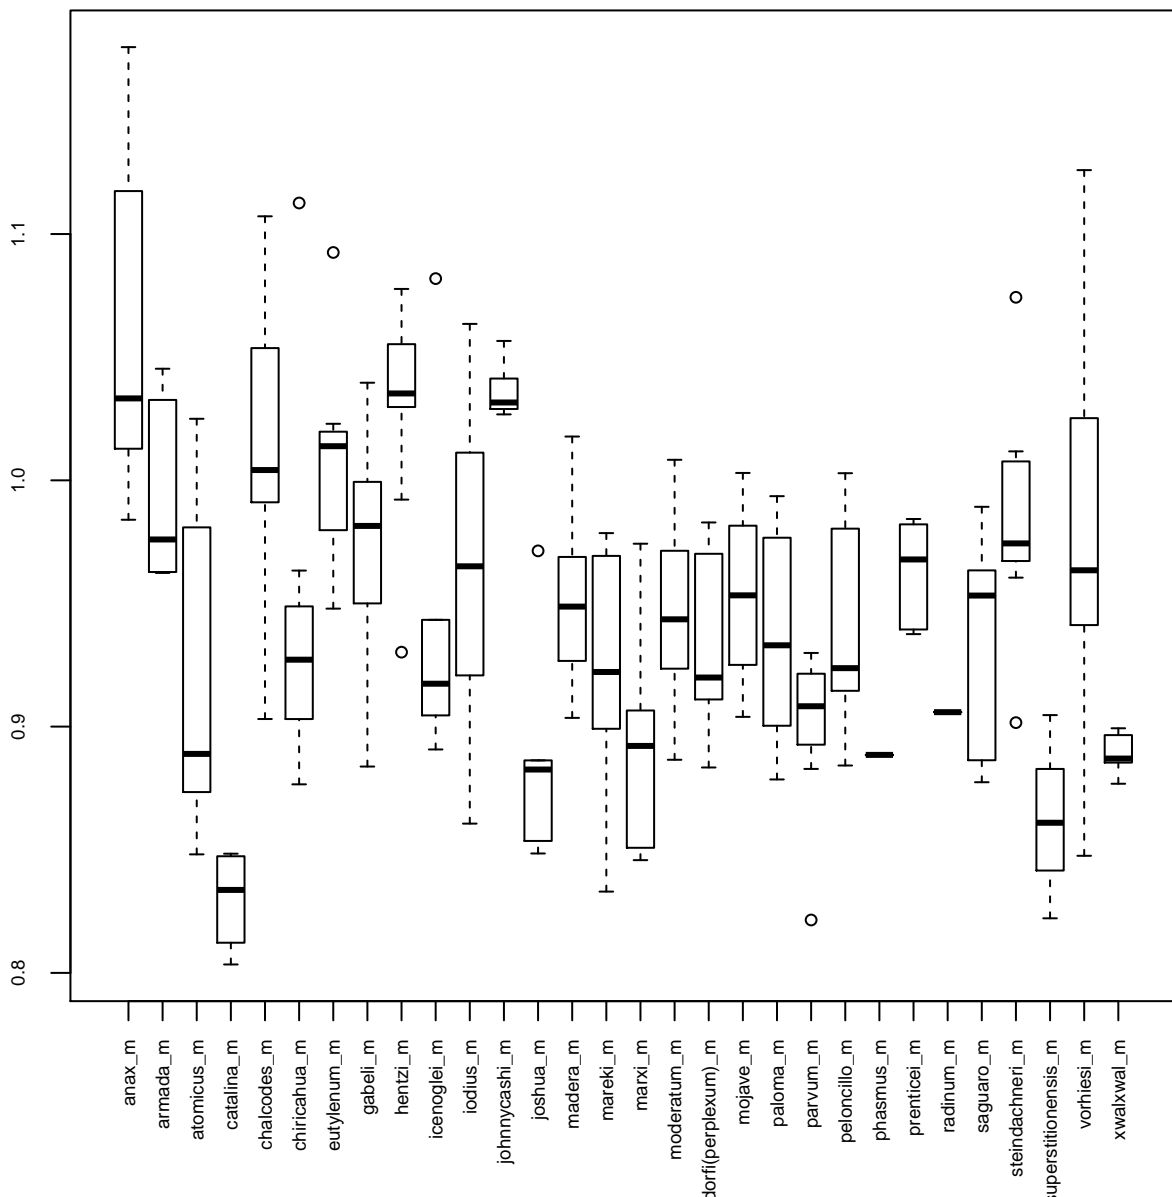

Supplement: Supplementary file 579

## Tarsus 1/Tibia 3 Length ratio – females

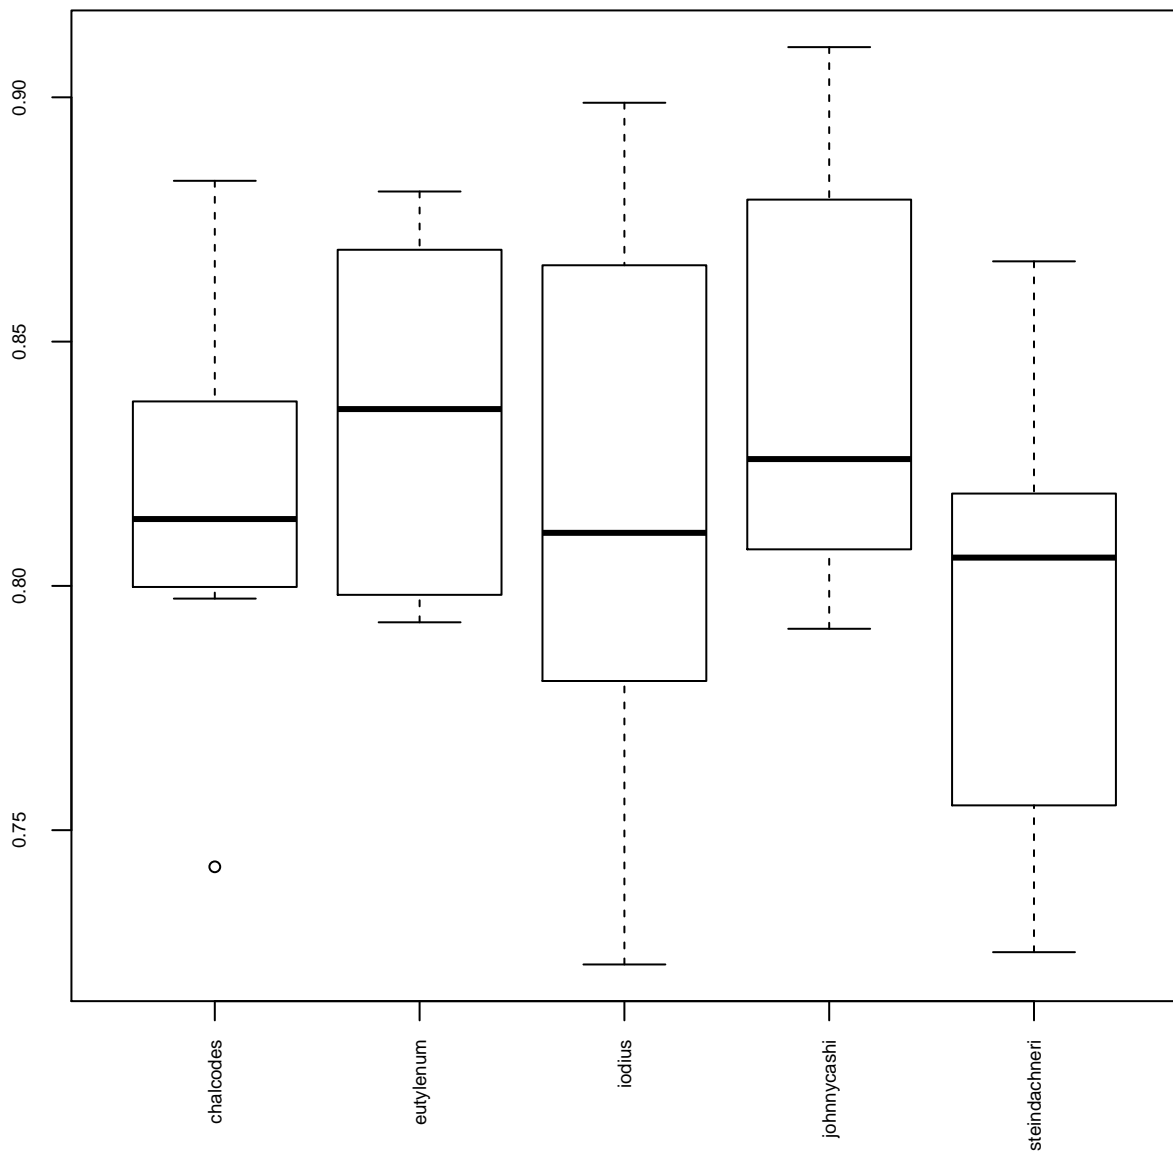

Supplement: Supplementary file 580

# Metatarsus 3/Tarsus 3 ratio – males

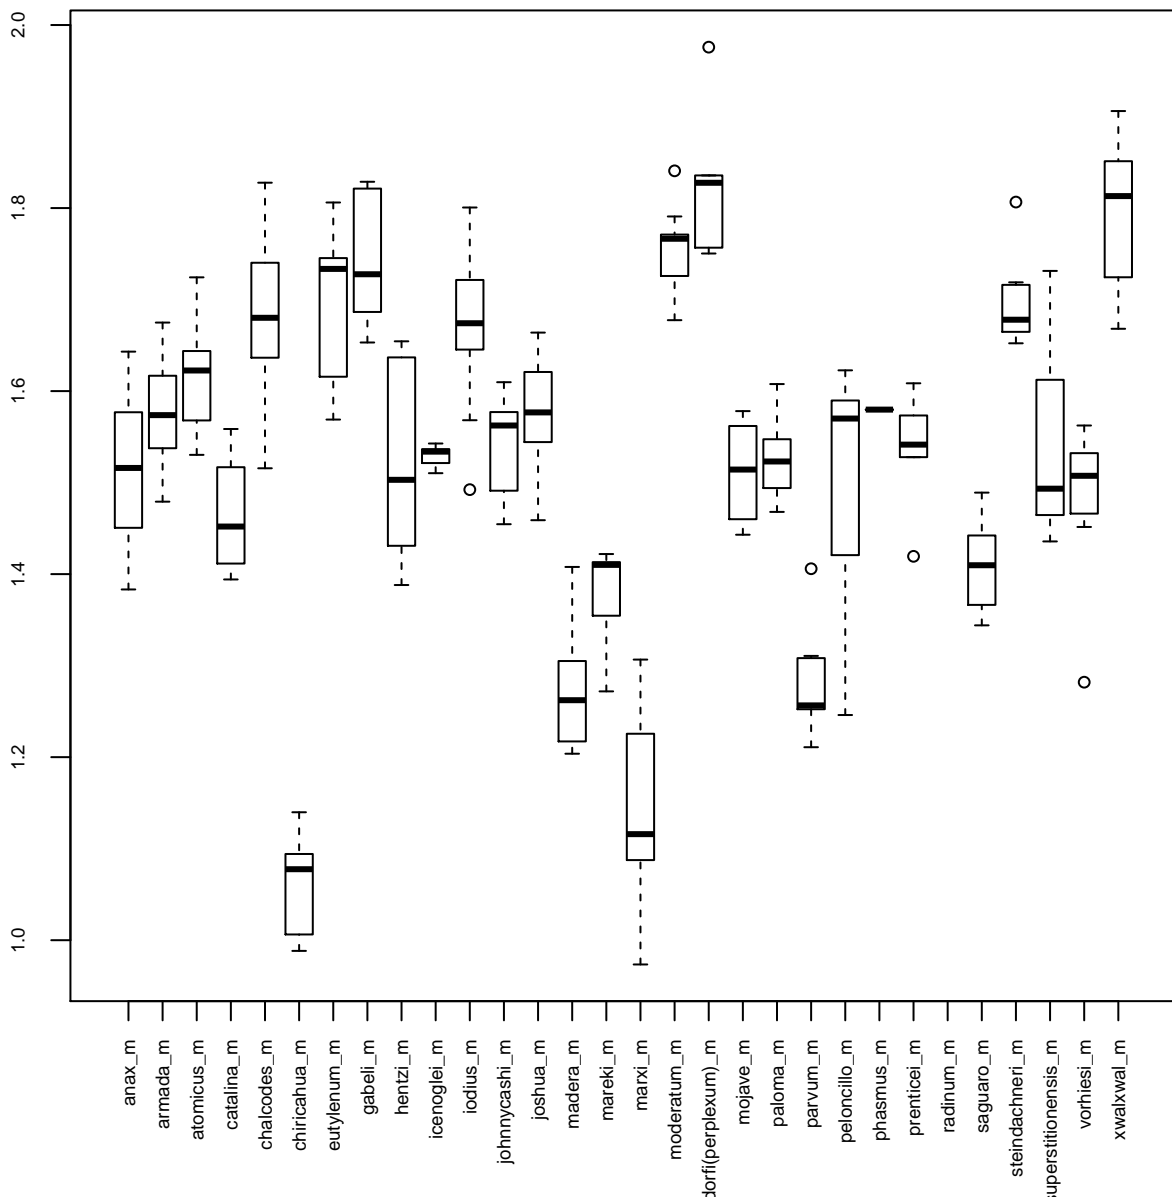

Supplement: Supplementary file 581

## Patella 3/Tibia 3 ratio – females

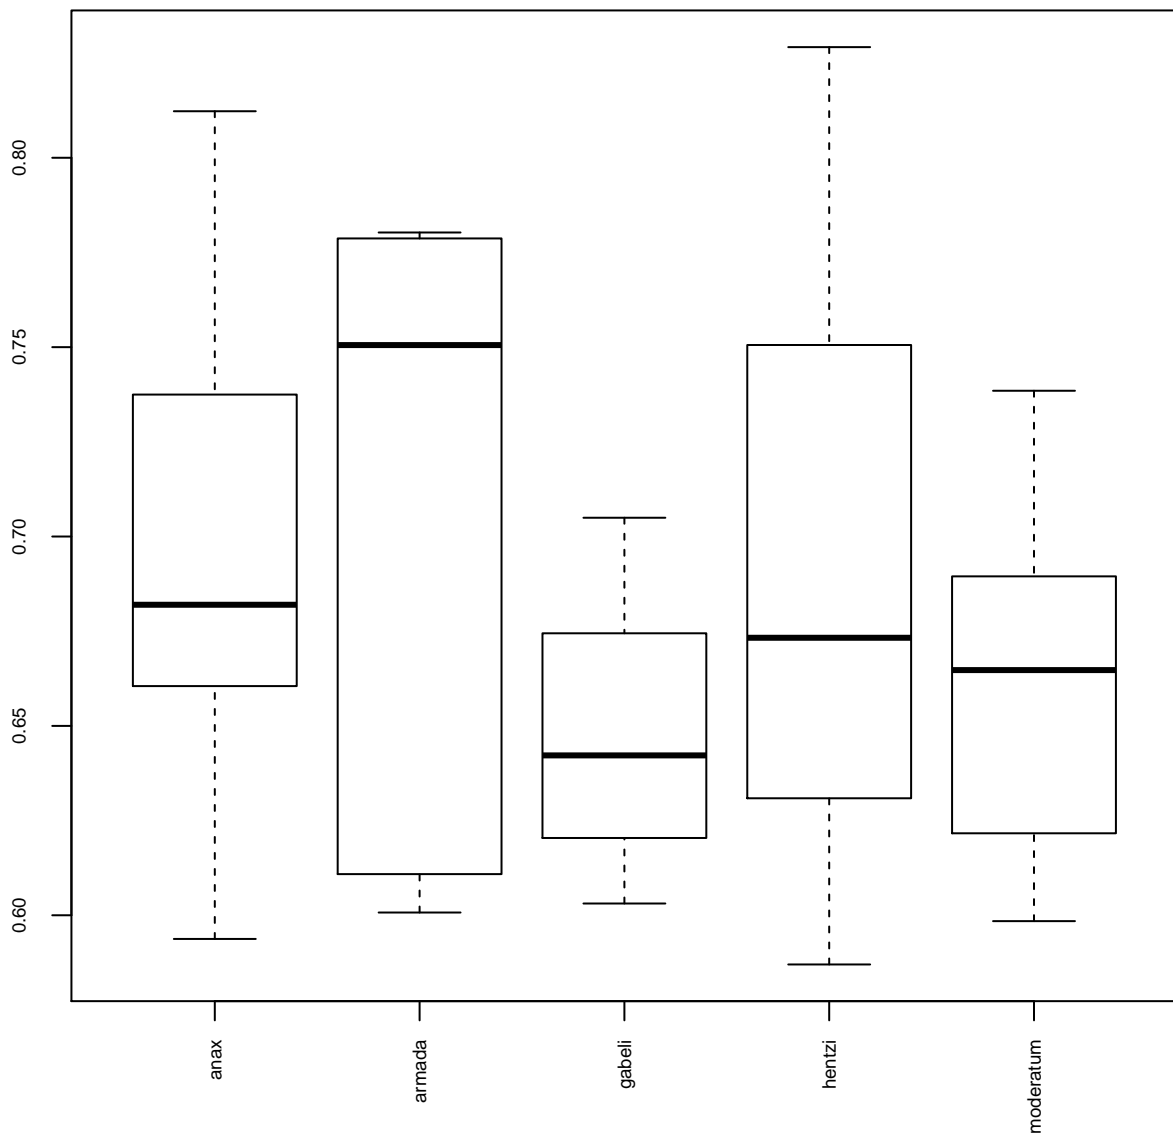

Supplement: Supplementary file 582

## Tibia 3/Patella 4 Length ratio – males

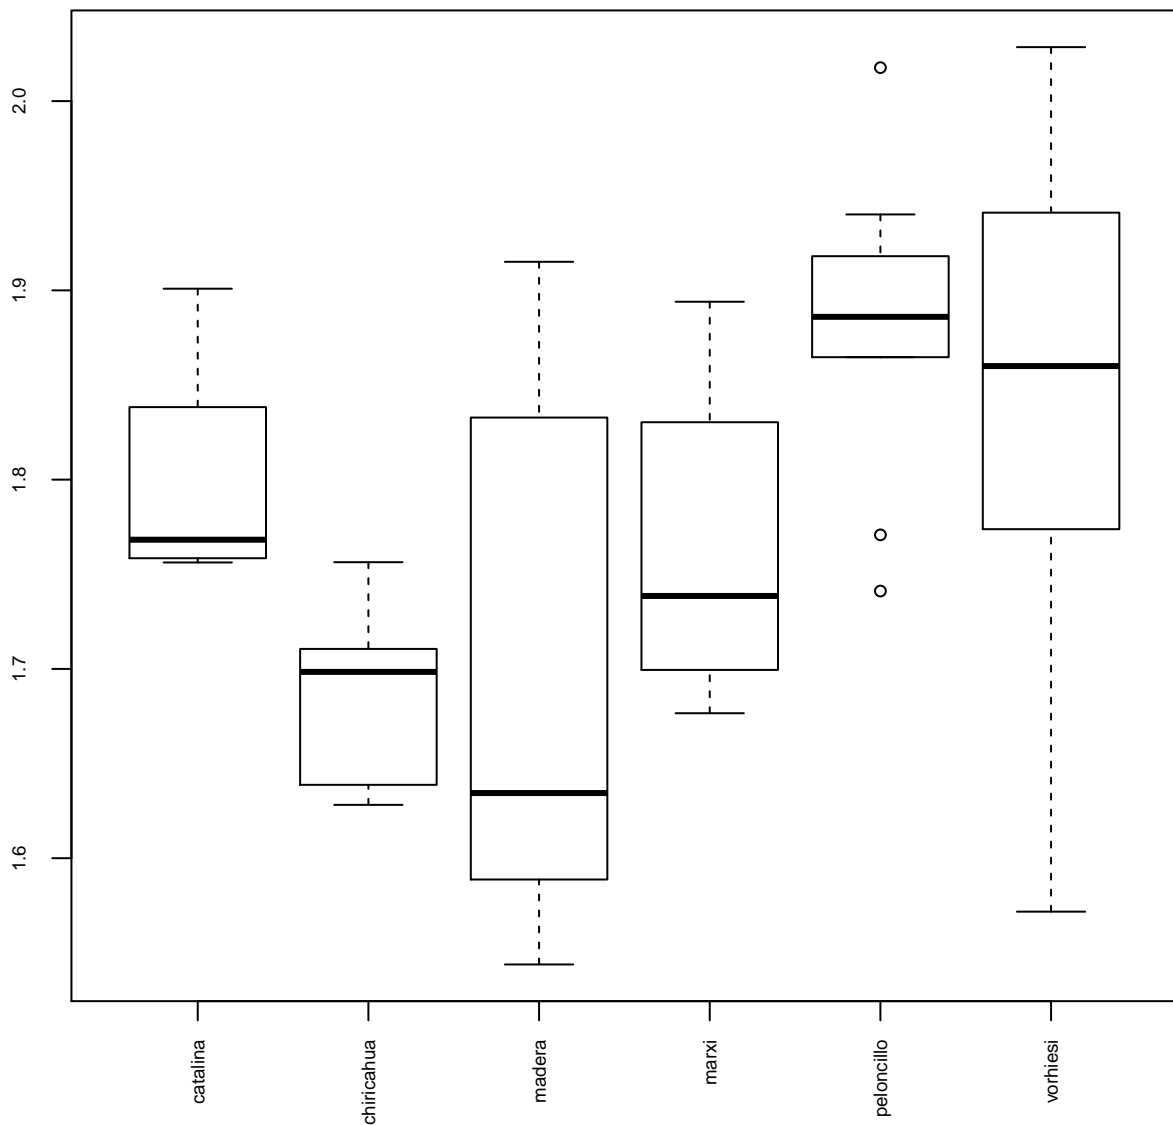

Supplement: Supplementary file 583

## Patella 3/Tibia 4 Length ratio – males

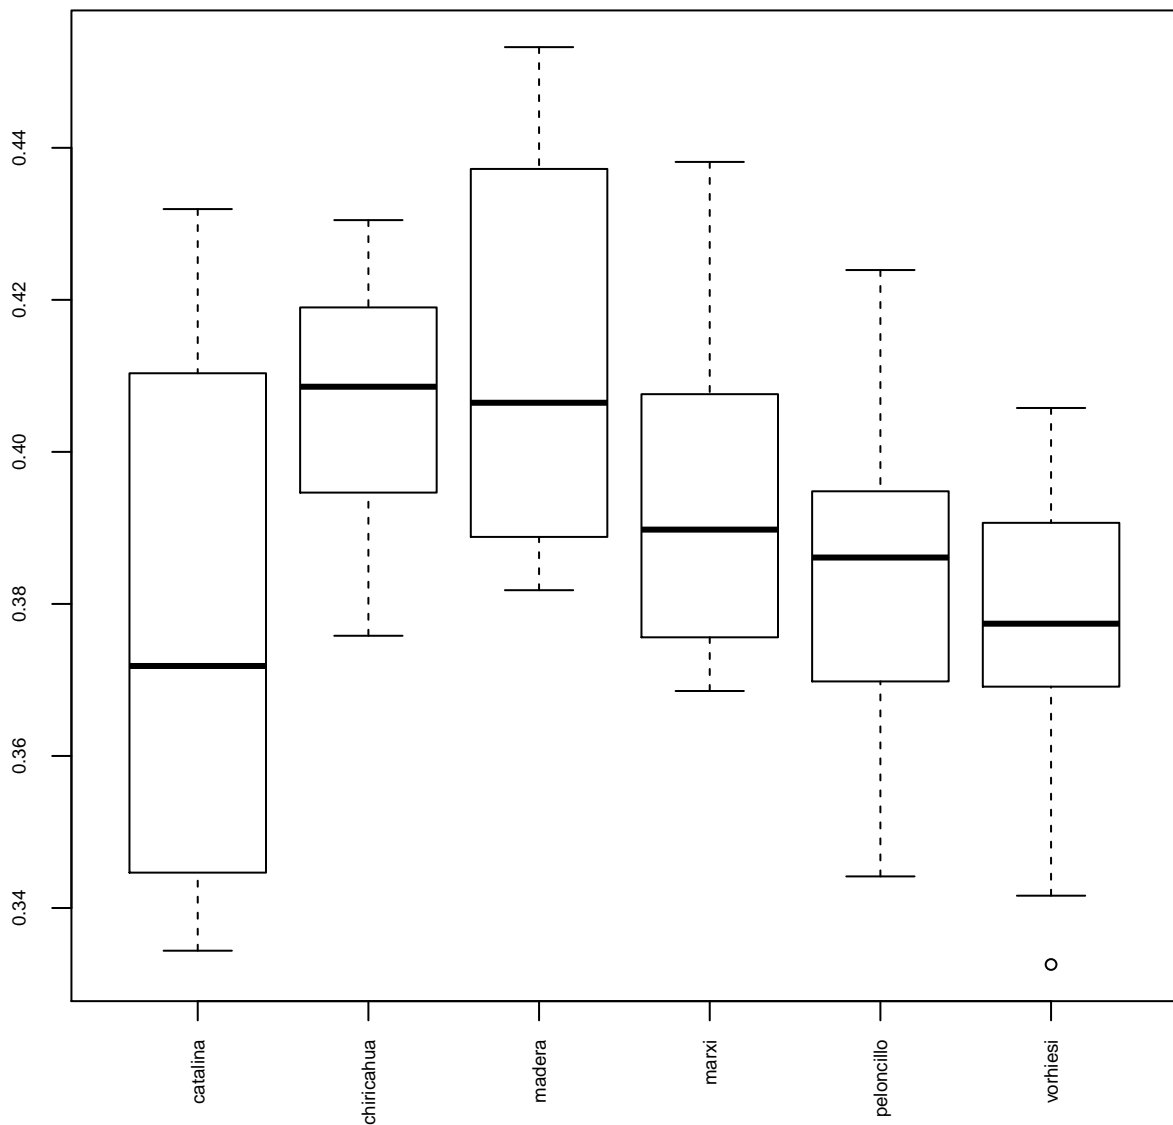

Supplement: Supplementary file 584

# Palpal Tibia/Patella 1 Length ratio – males

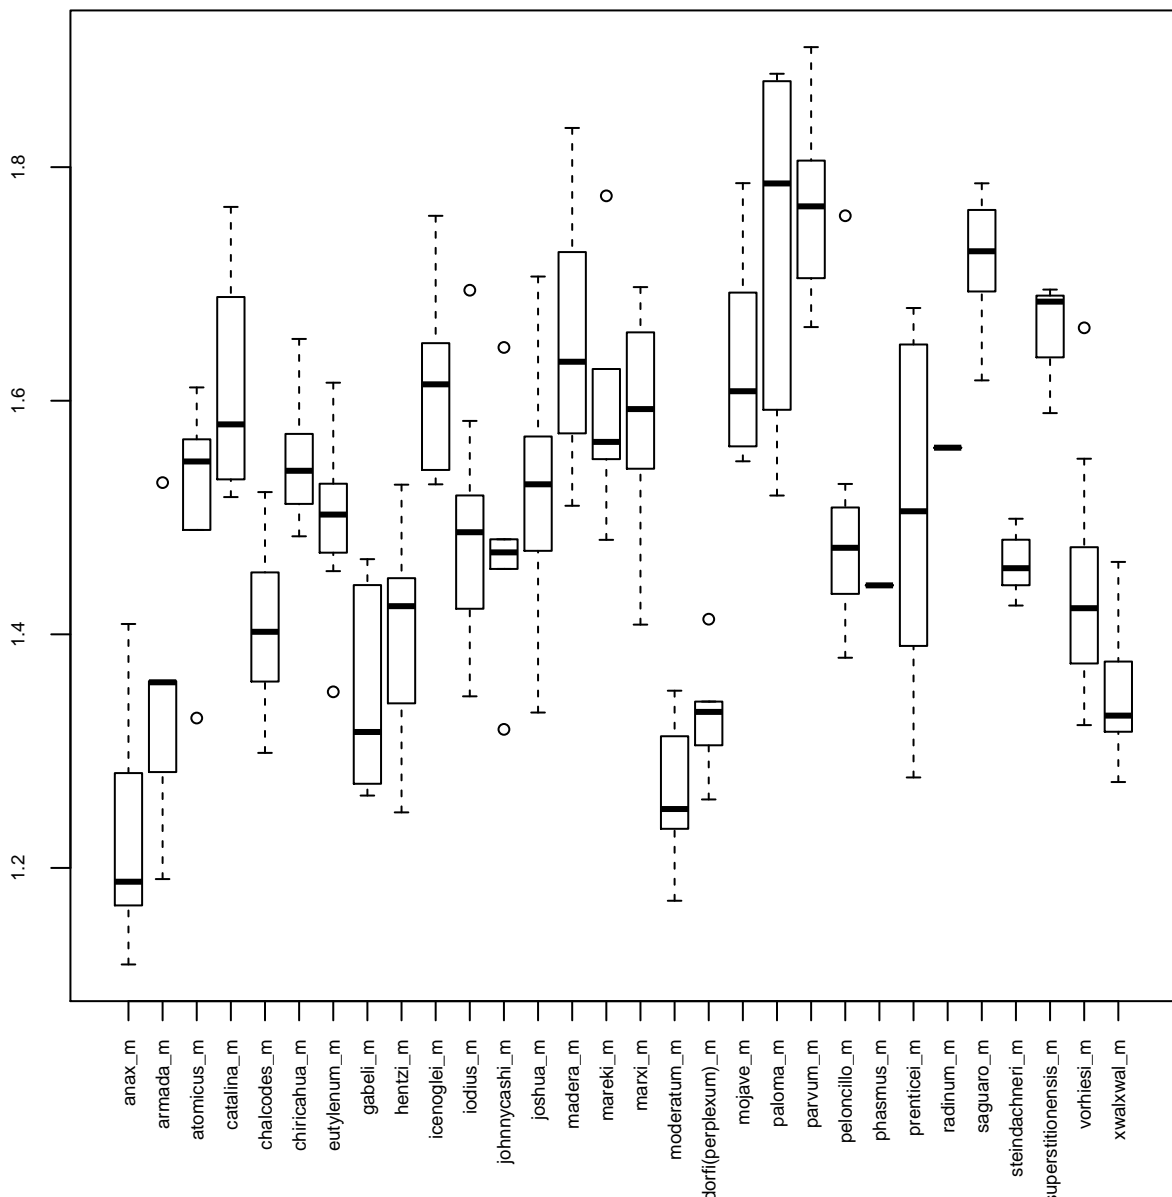

Supplement: Supplementary file 585

## Tibia 1/Tarsus 1 ratio – males

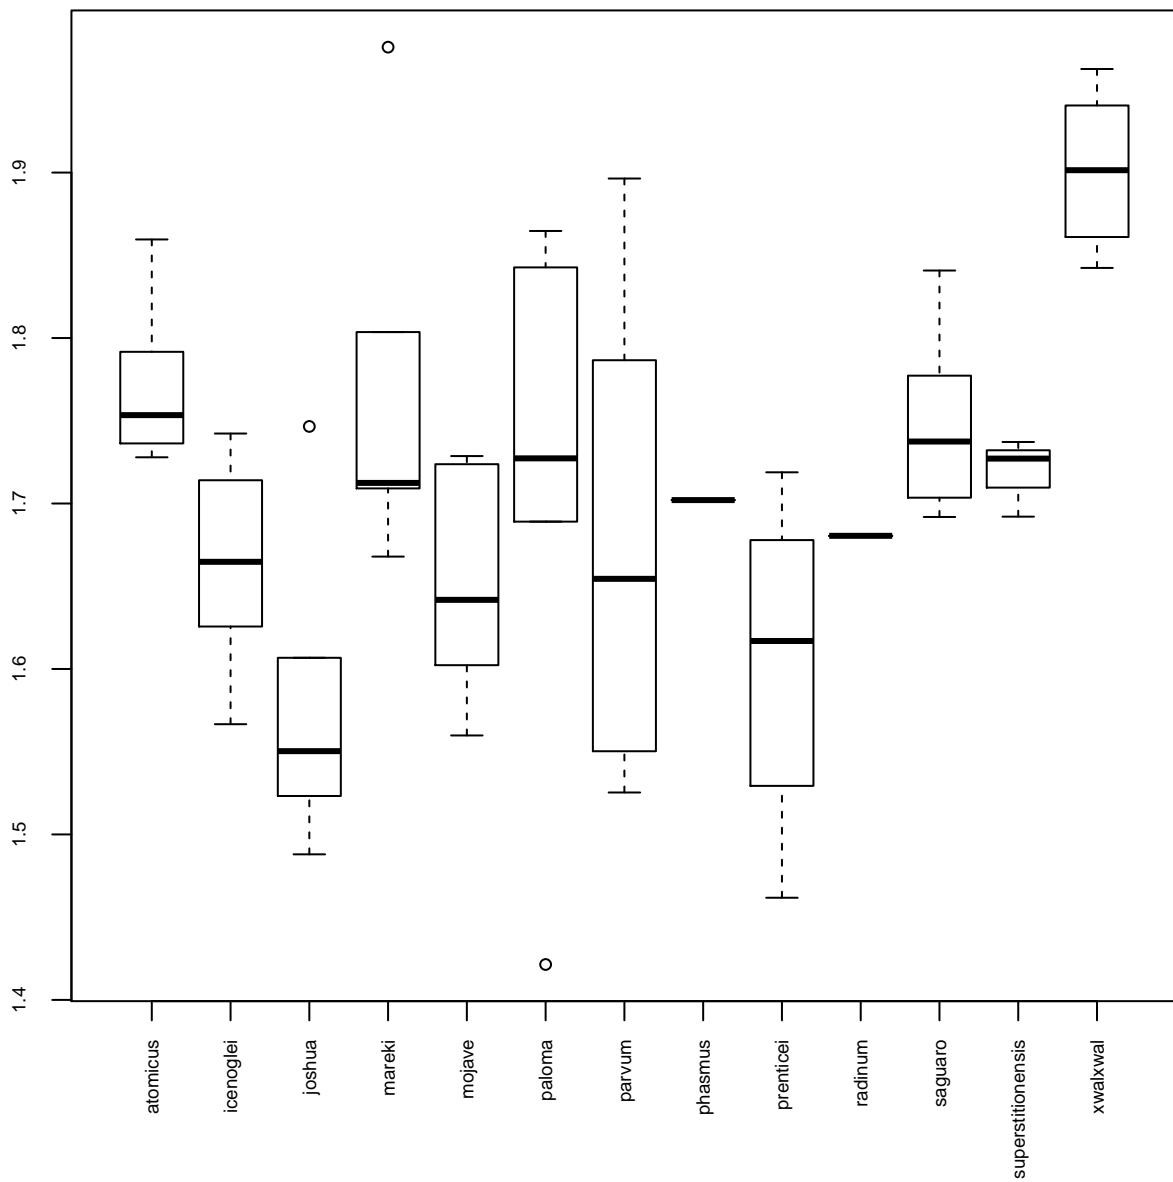

Supplement: Supplementary file 586

## Tibia 3/Tibia 4 ratio – females

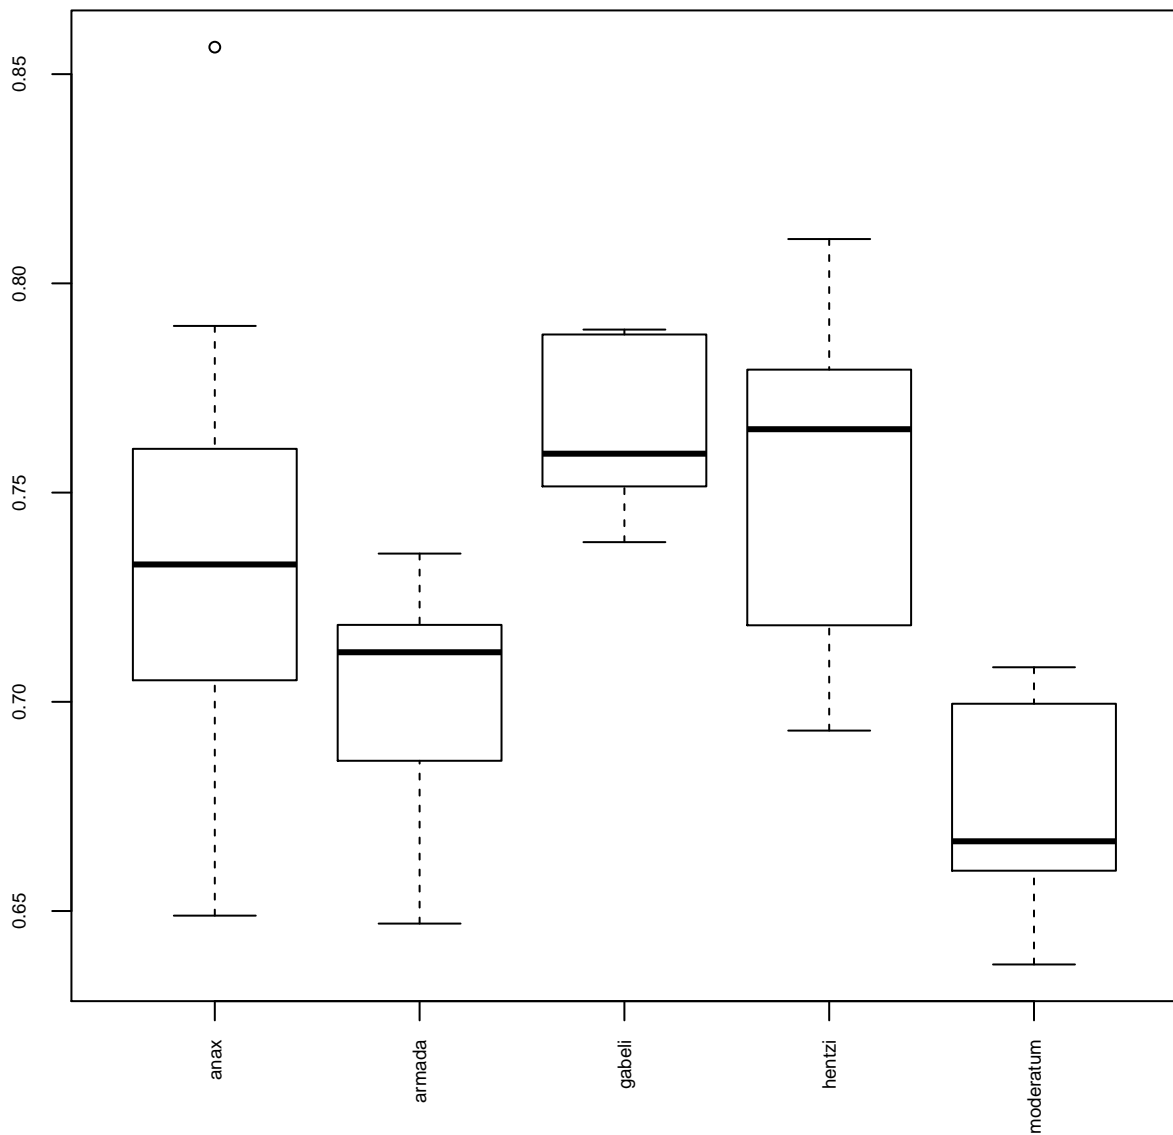

Supplement: Supplementary file 587

## Femur 1 Length/Width ratio – females

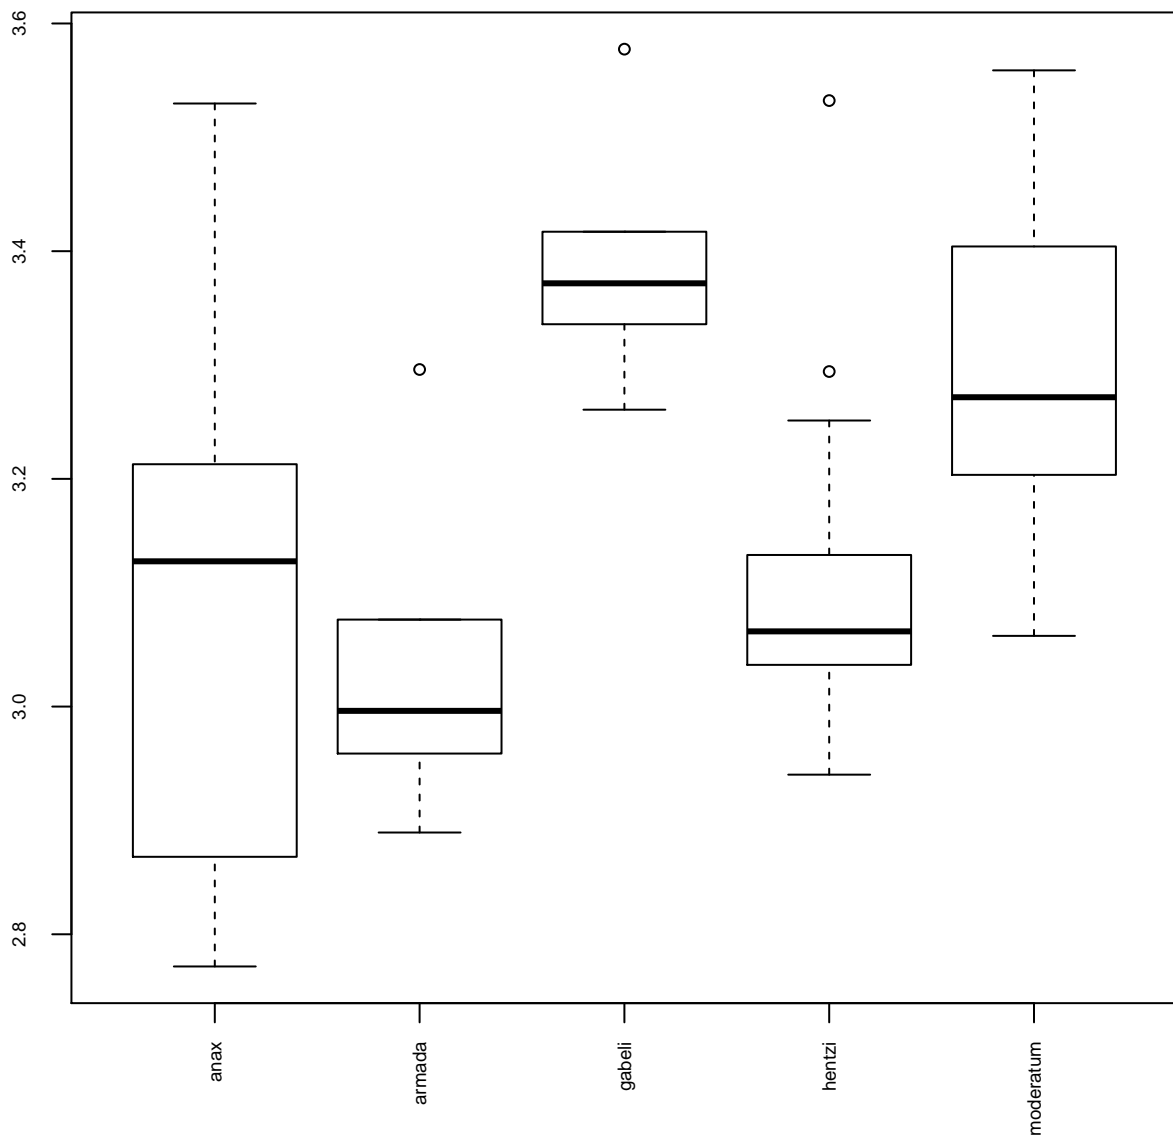

Supplement: Supplementary file 588

## Carapace Length/Metatarsus 3 ratio – males

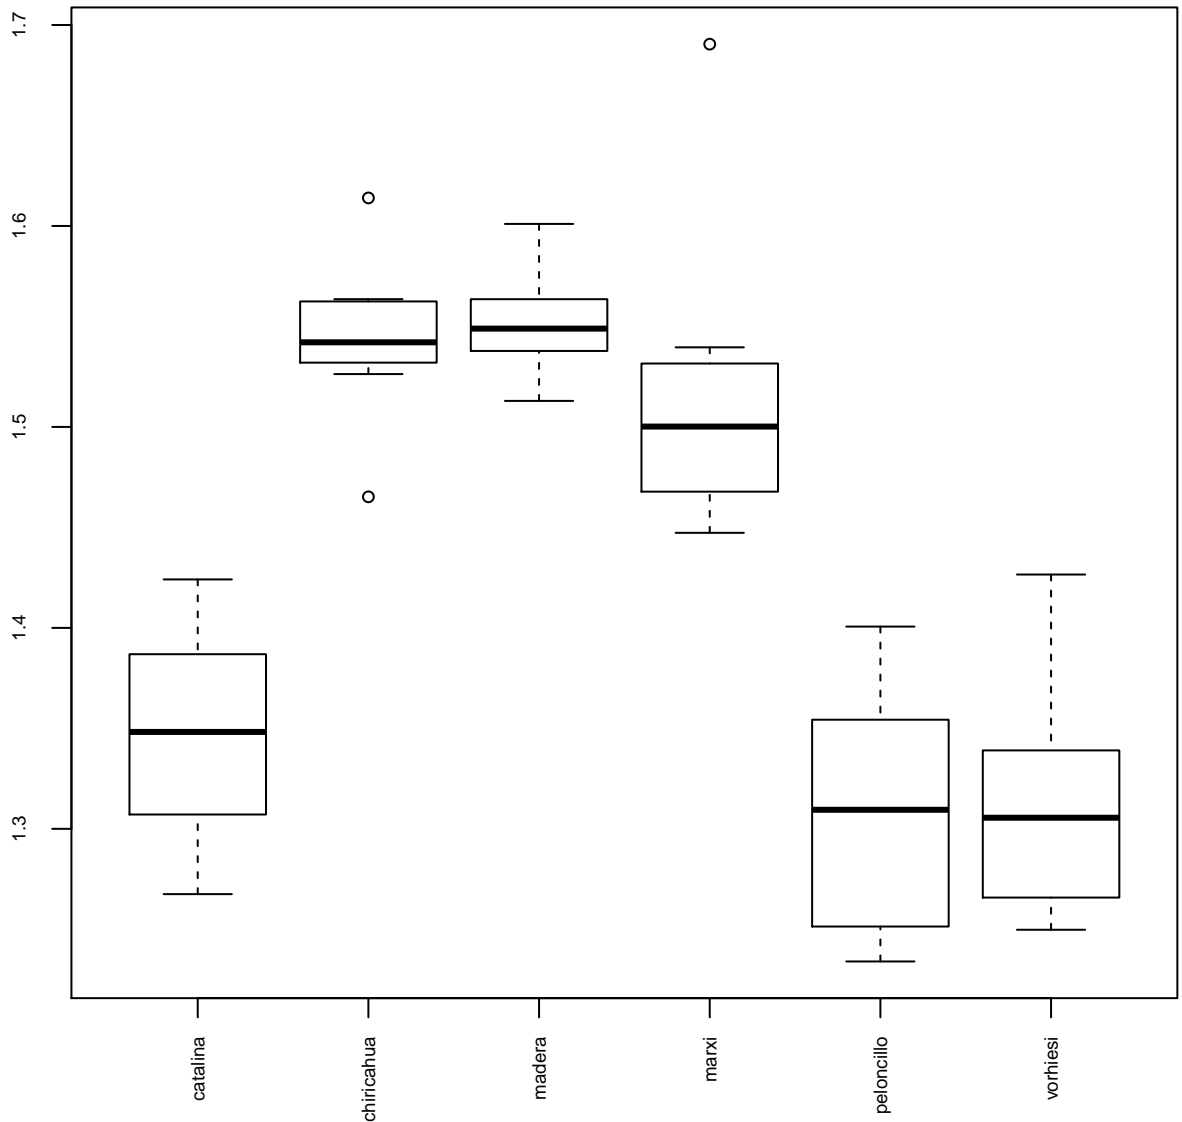

Supplement: Supplementary file 589

# Tibia 1/Tarsus 4 Length ratio – females

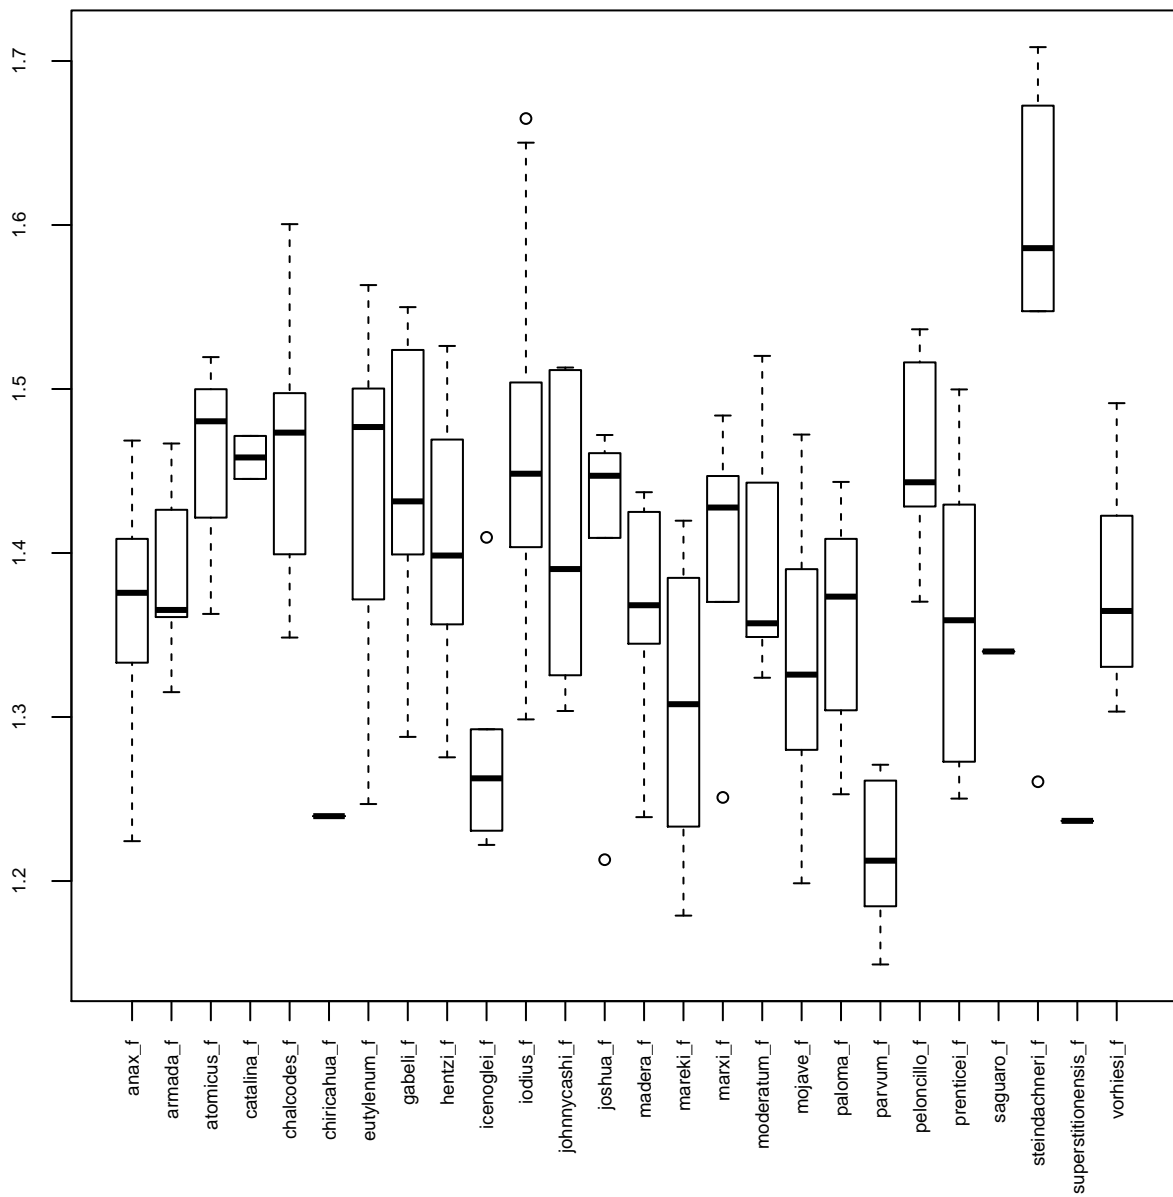

Supplement: Supplementary file 590

## Tibia 1/Patella 4 Length ratio – females

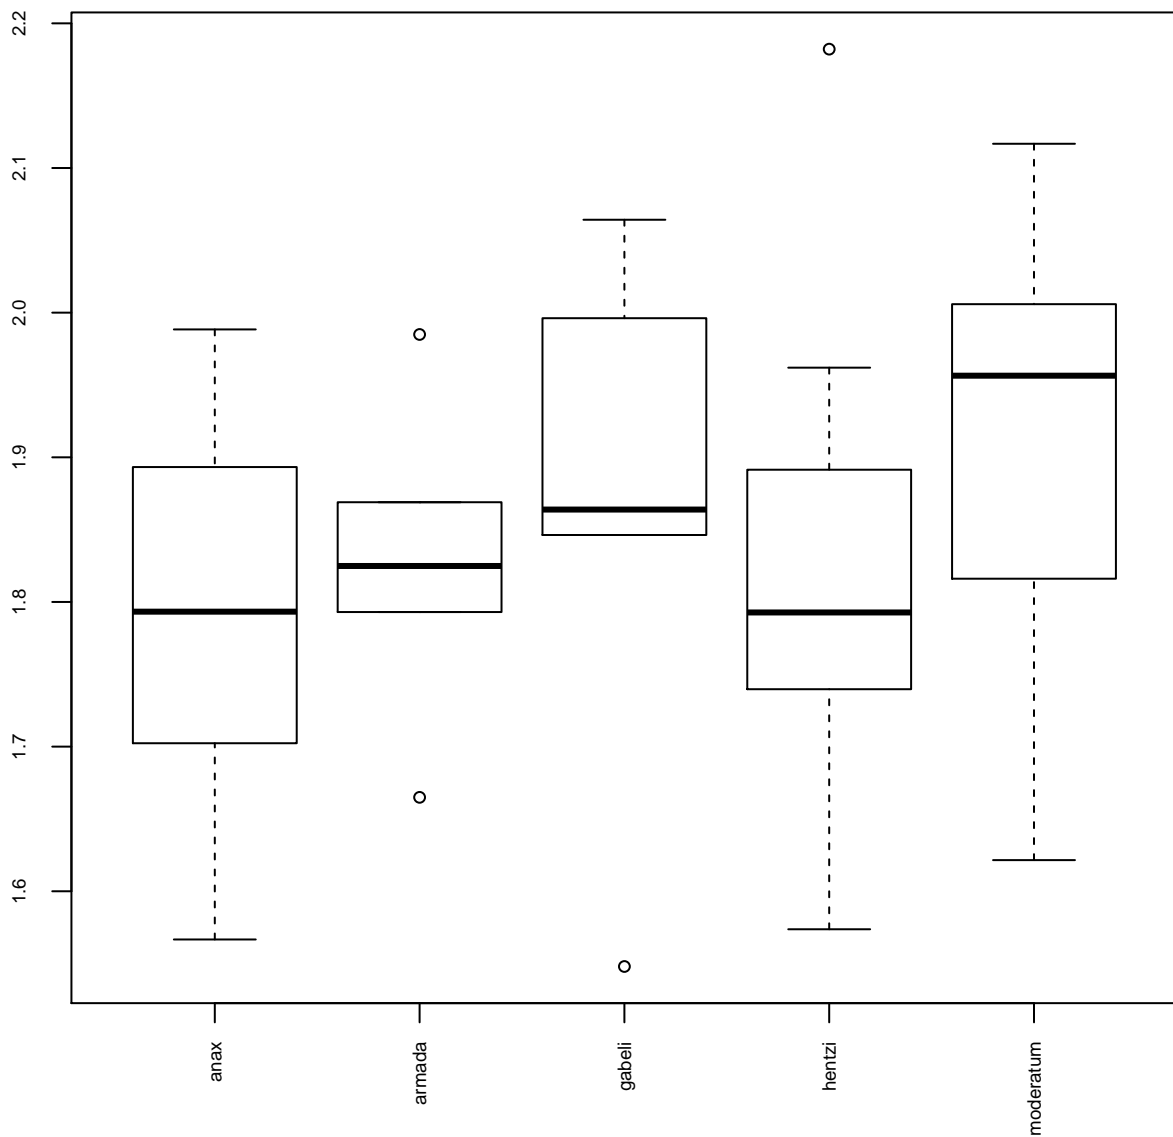

Supplement: Supplementary file 591

## Metatarsus 1/Patella 4 Length ratio – males

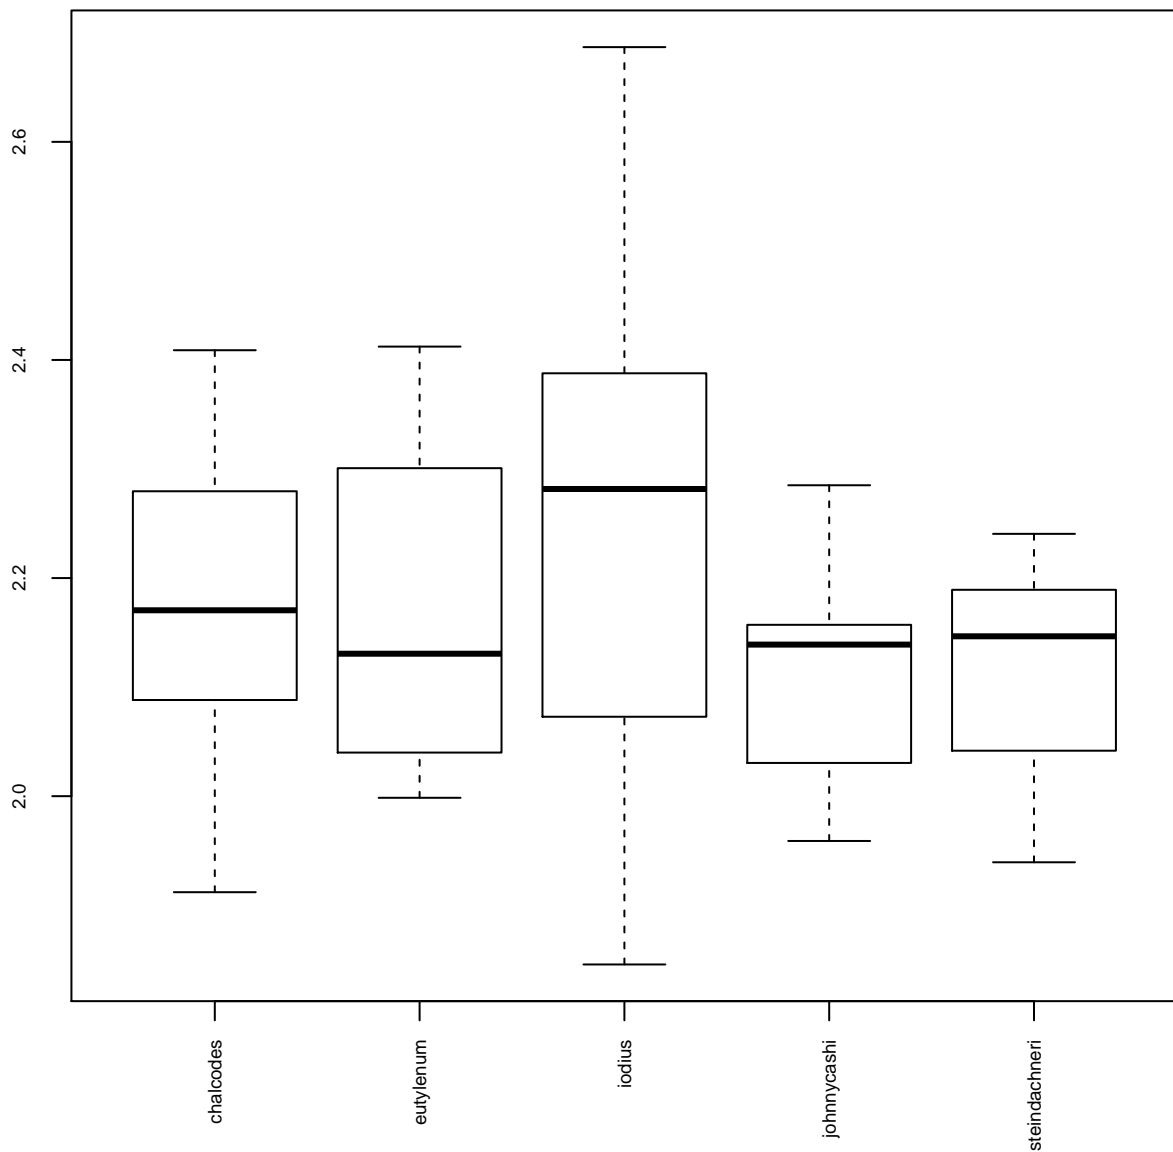

Supplement: Supplementary file 592

## Palpal Tibia/Patella 4 Length ratio – males

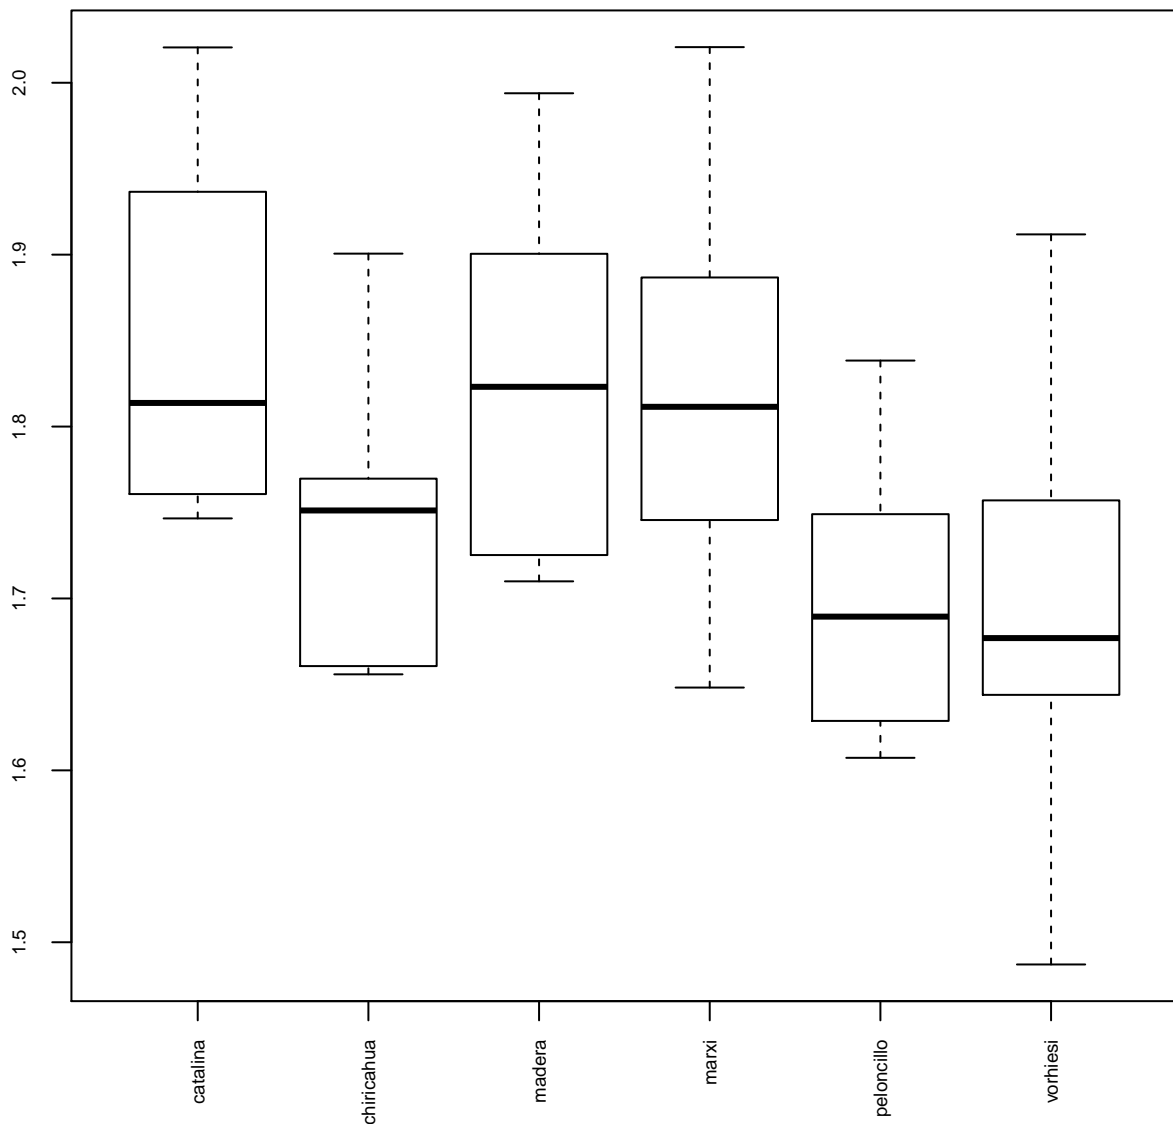

Supplement: Supplementary file 593

# Patella 1/Metatarsus 1 ratio – males

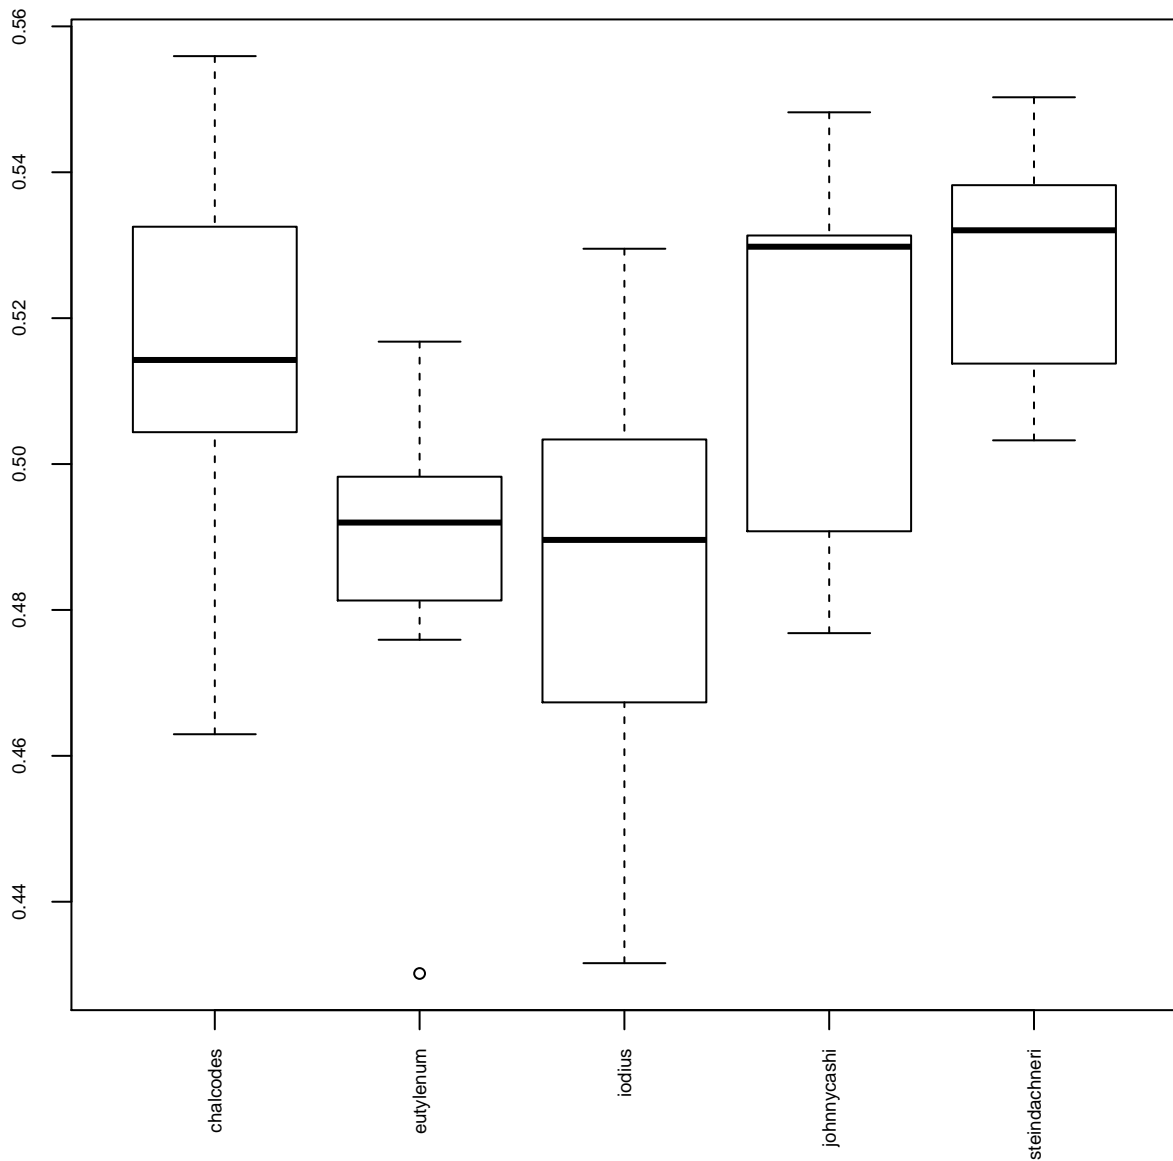

Supplement: Supplementary file 594

## Tibia 1/Tarsus 4 Length ratio – males

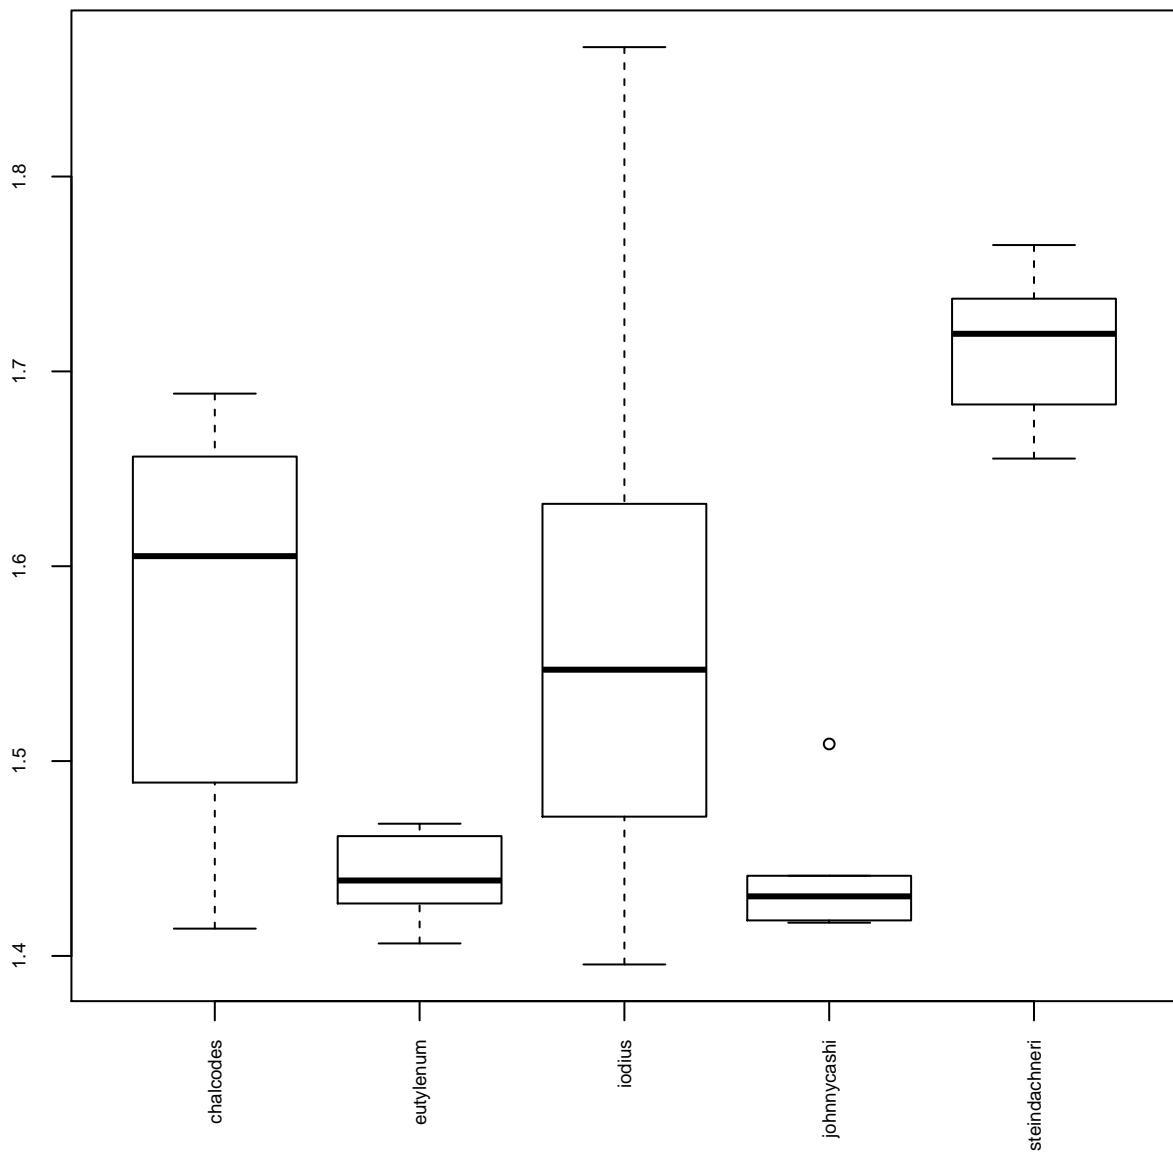

Supplement: Supplementary file 595

# Tibia 4/Metatarsus 4 ratio – females

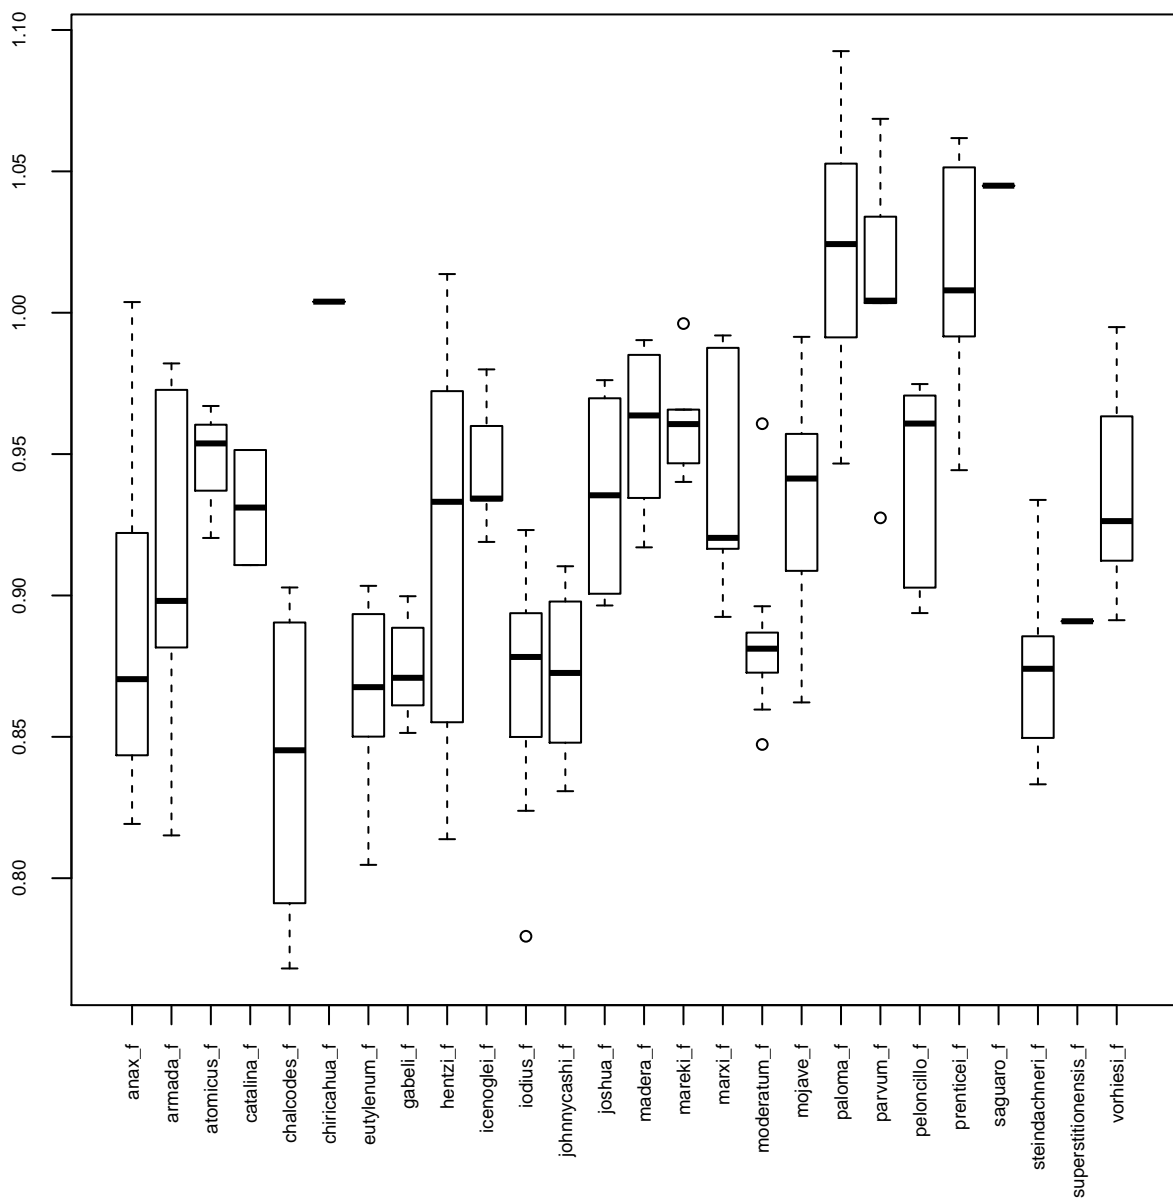

Supplement: Supplementary file 596

## Patella 4/Metatarsus 4 ratio – males

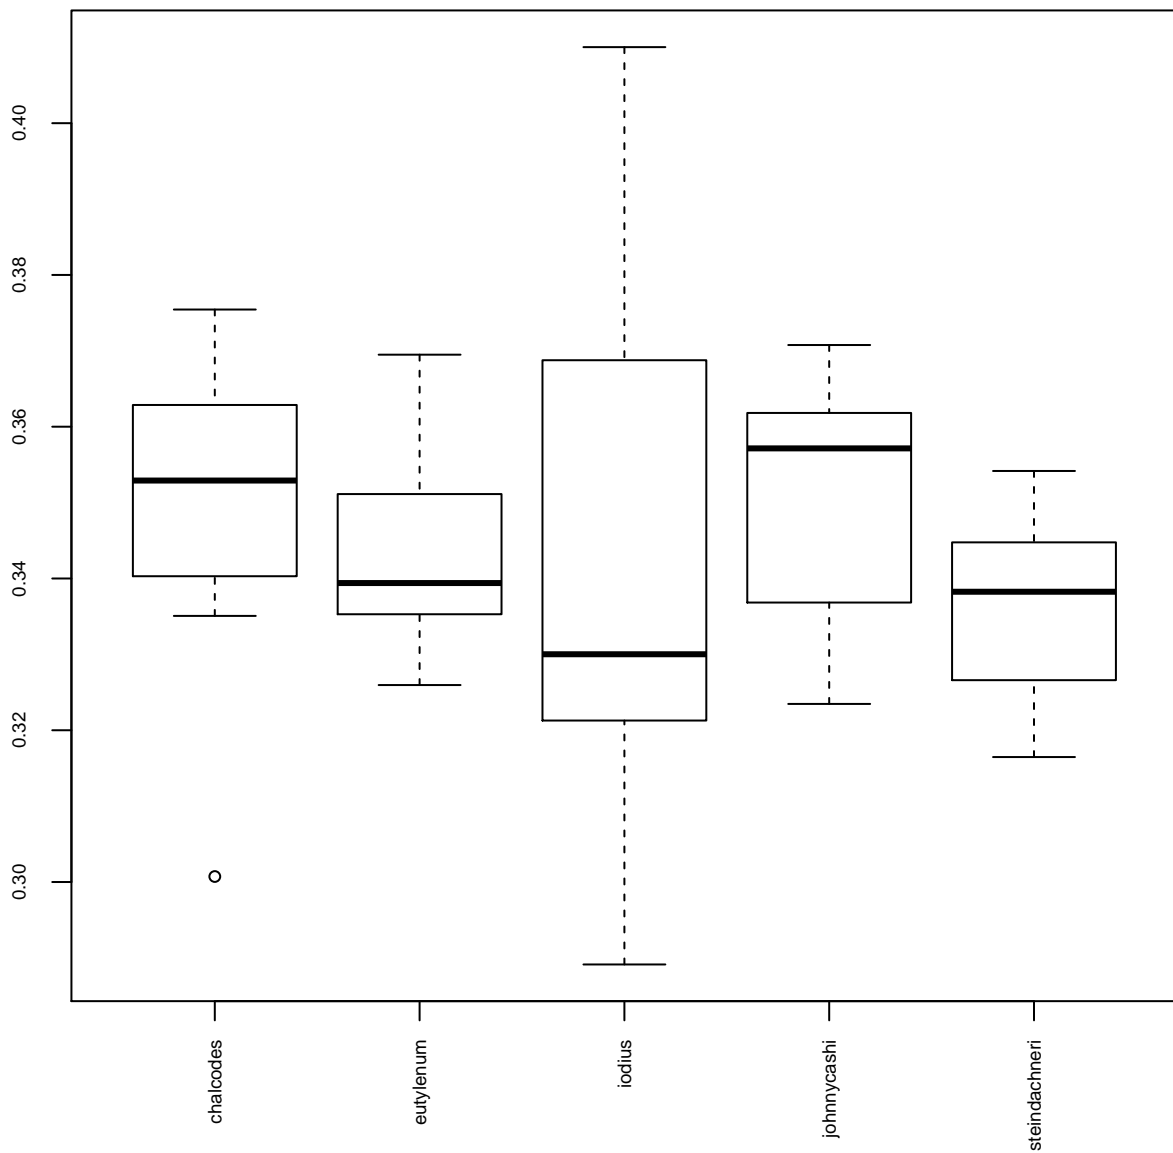

Supplement: Supplementary file 597

## Patella 1/Metatarsus 3 Length ratio – females

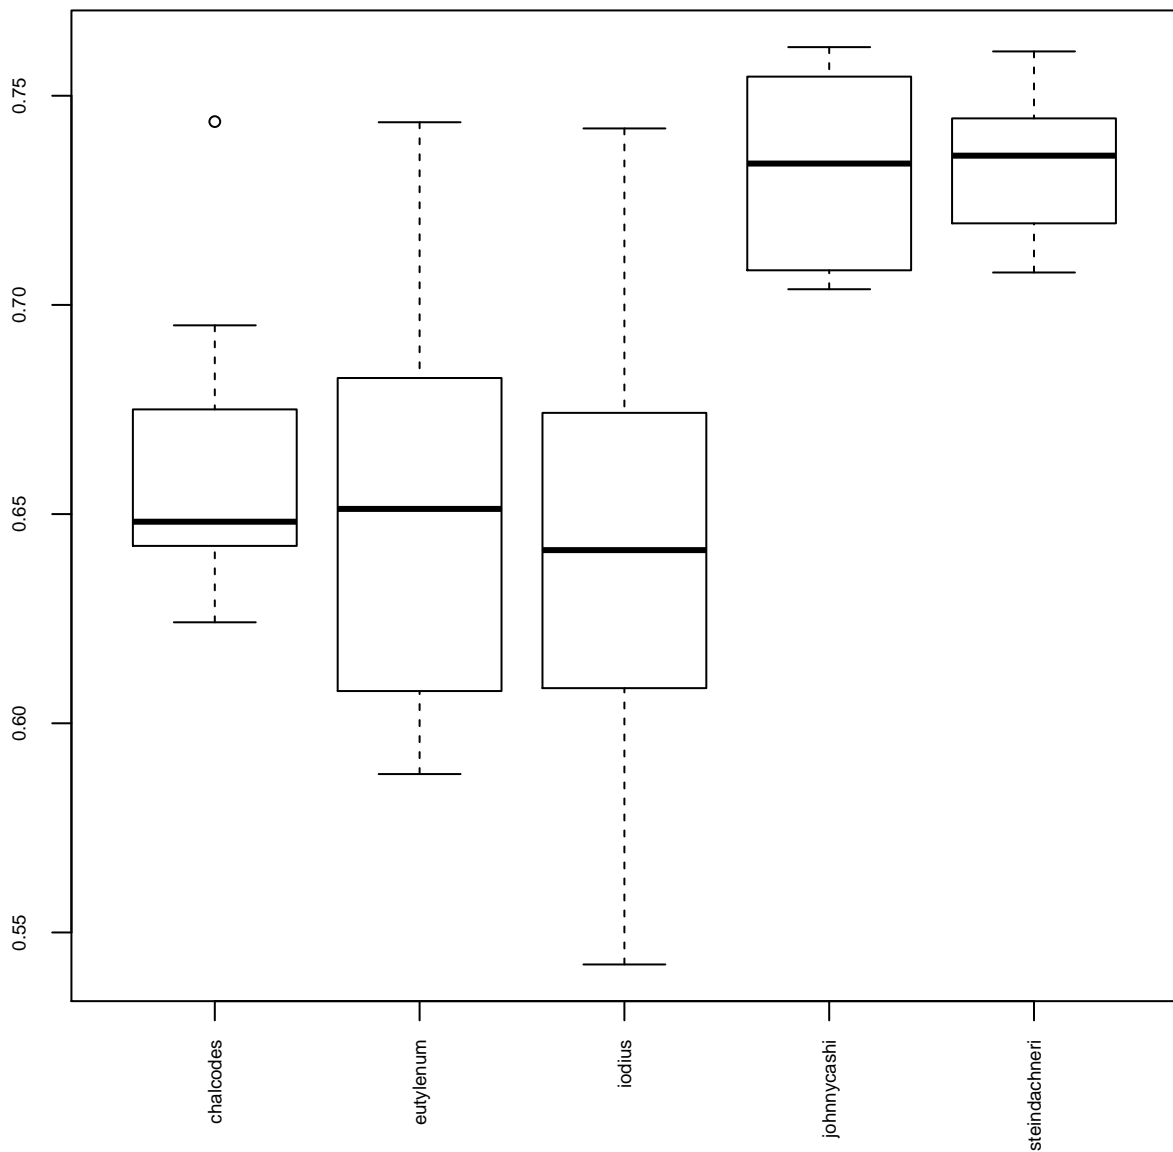

Supplement: Supplementary file 598

# Tarsus 1/Patella 3 Length ratio – females

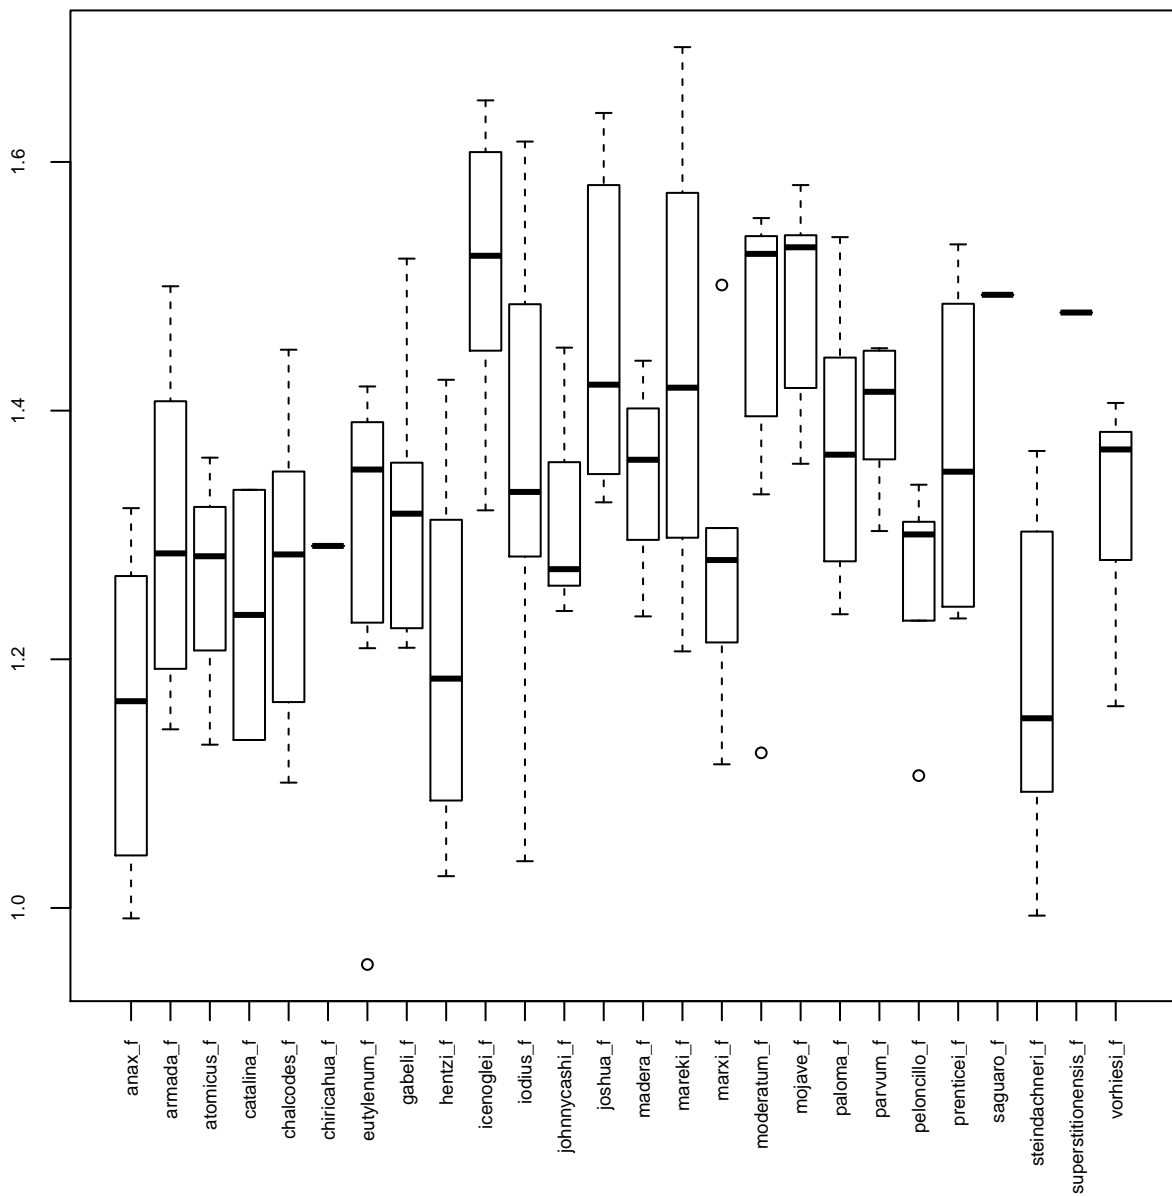

Supplement: Supplementary file 599

## Carapace Length/Tarsus 1 ratio – females

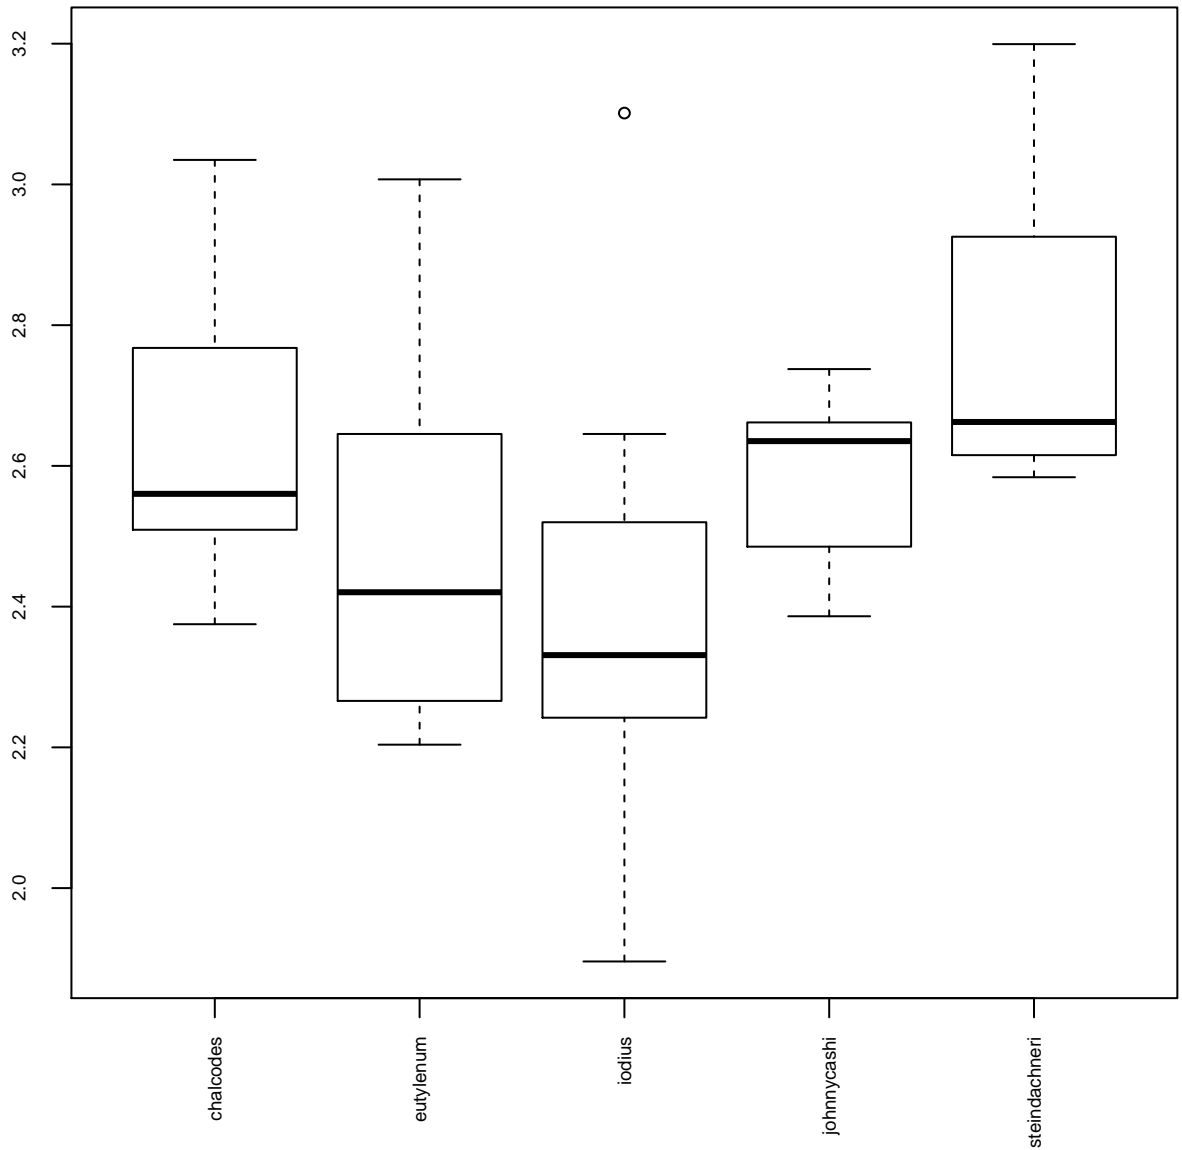

Supplement: Supplementary file 600
