# Supplementary material (part 7 of 15)
Source: publisher site journal article supplement (http://zookeys.pensoft.net/article/6264/download/suppl/32/)

## Carapace Length/Tarsus 4 ratio – males

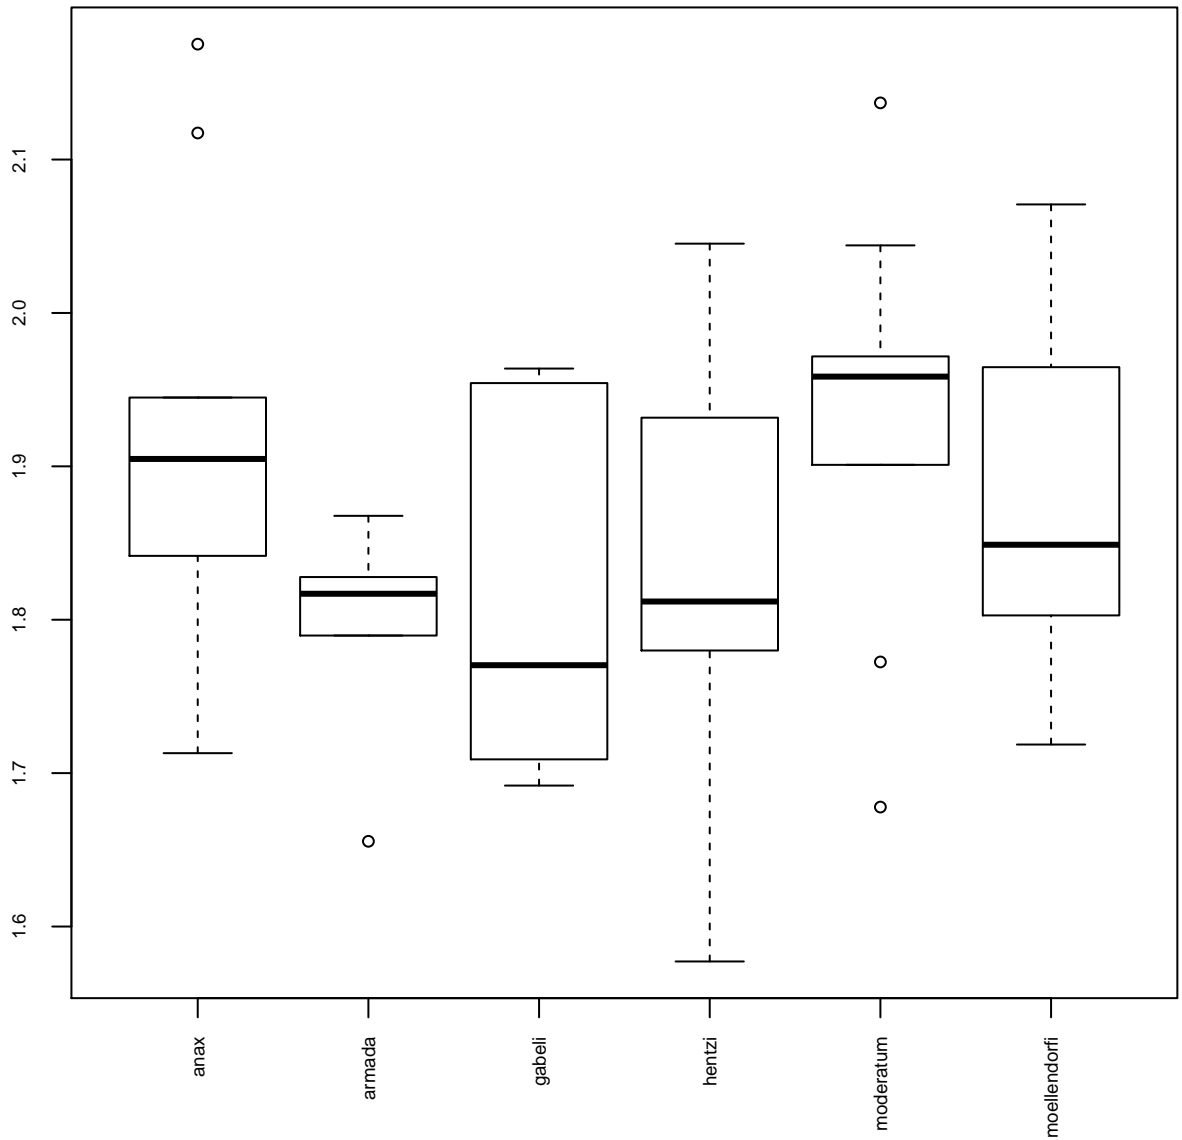

Supplement: Supplementary file 601

## Tarsus 1/Tarsus 3 ratio – females

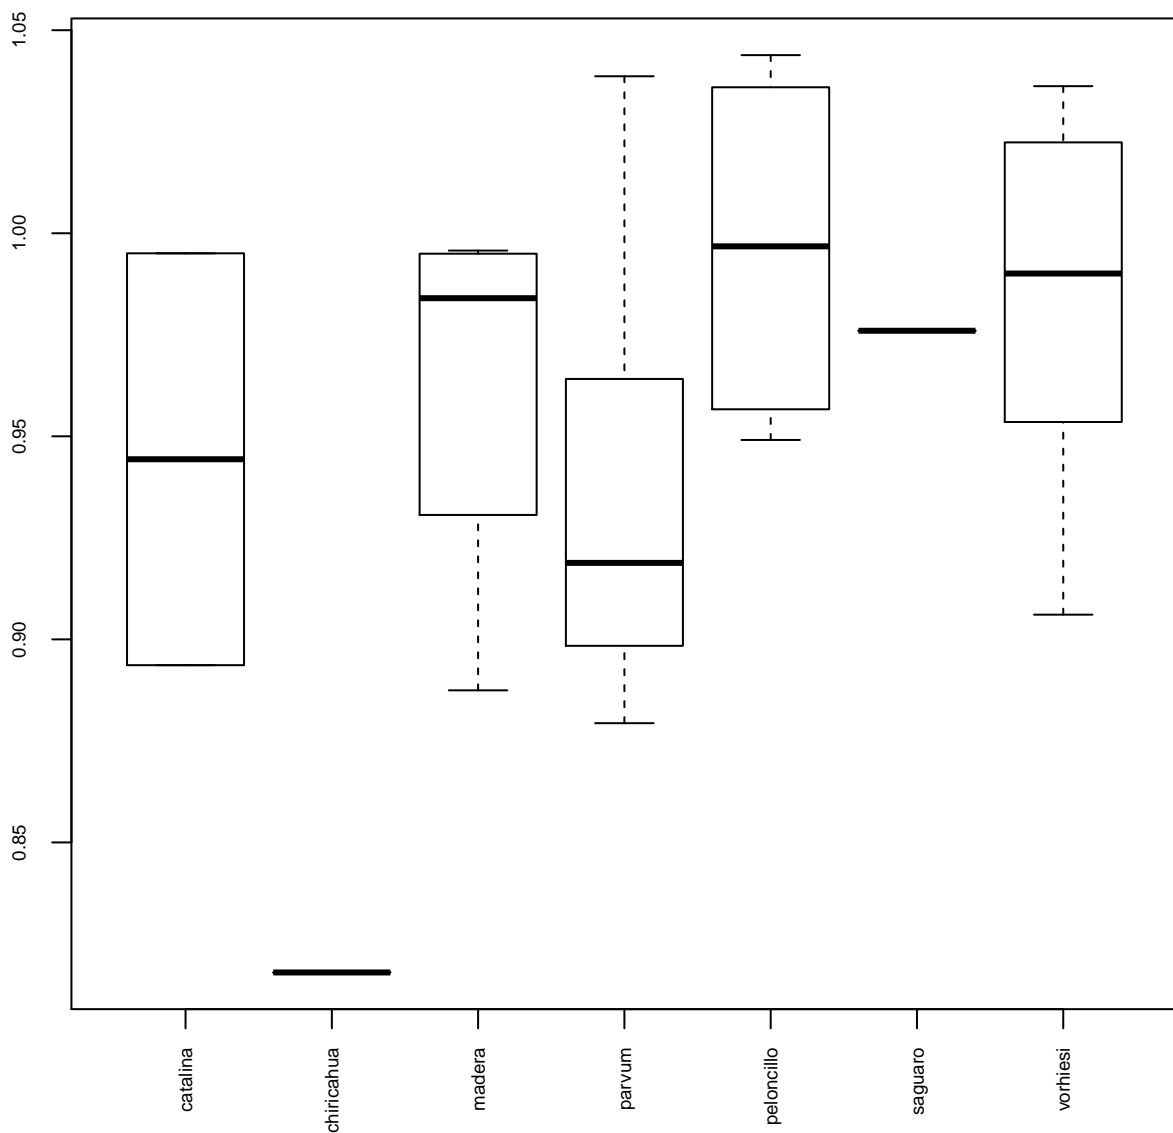

Supplement: Supplementary file 602

## Patella 1/Femur 4 Length ratio – males

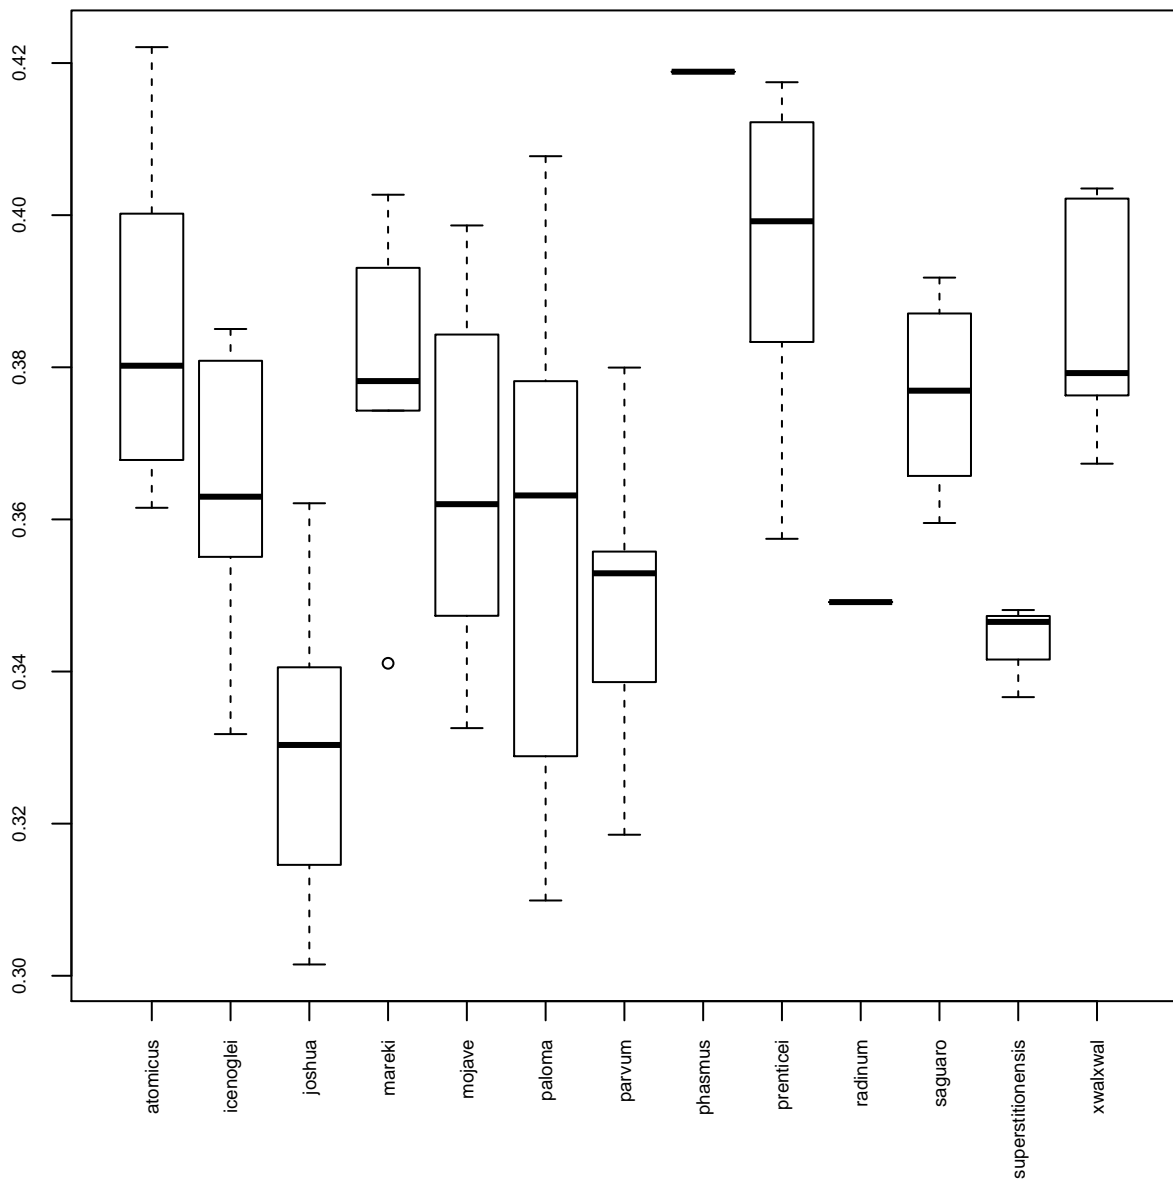

Supplement: Supplementary file 603

## Carapace Length/Width ratio – females

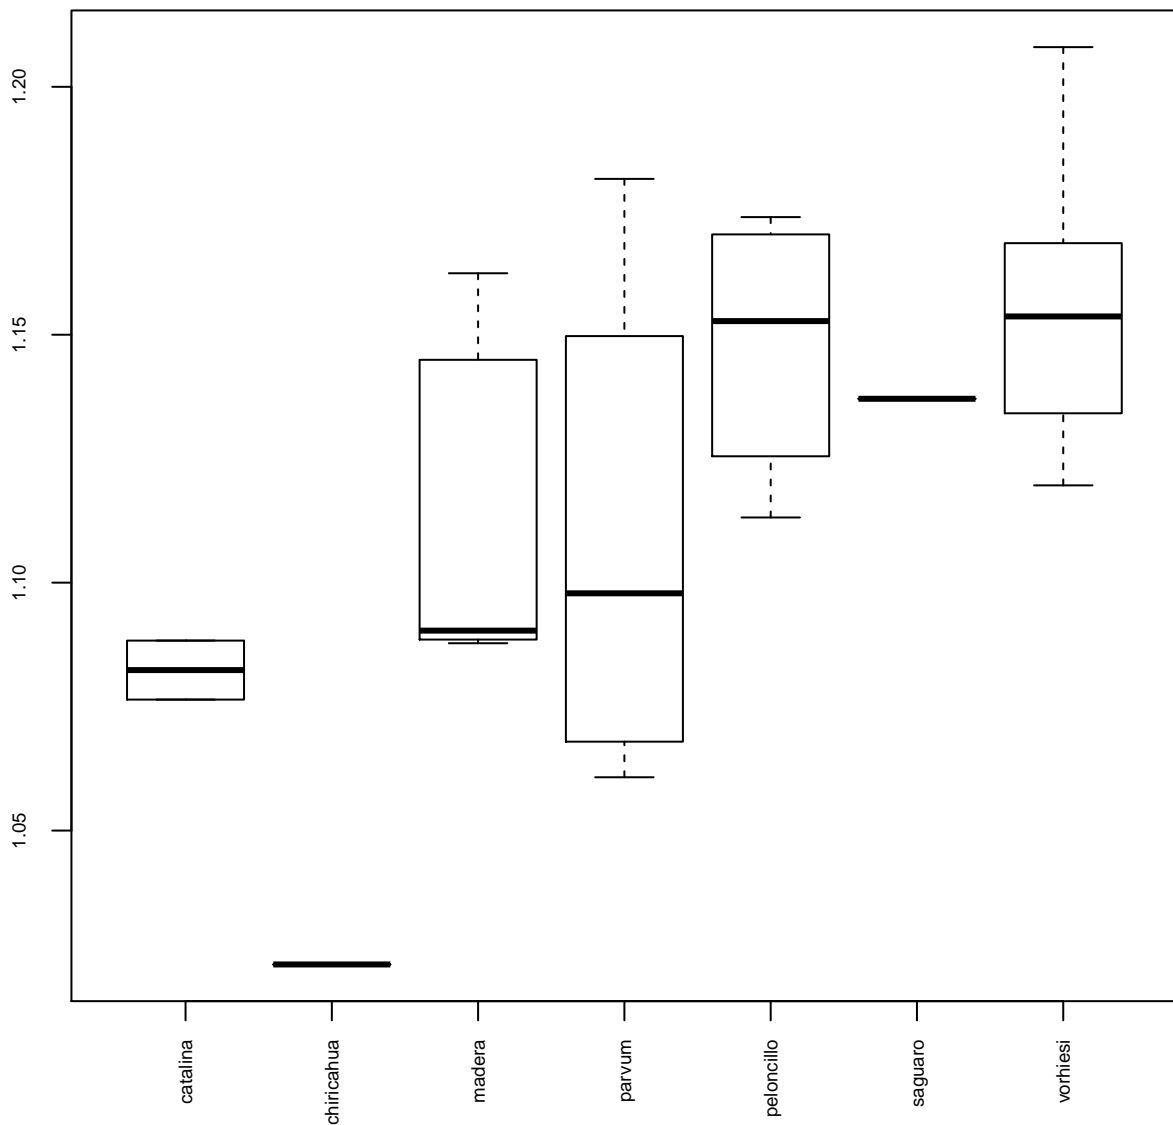

Supplement: Supplementary file 604

## Palpal Tibia/Tarsus 4 Length ratio – males

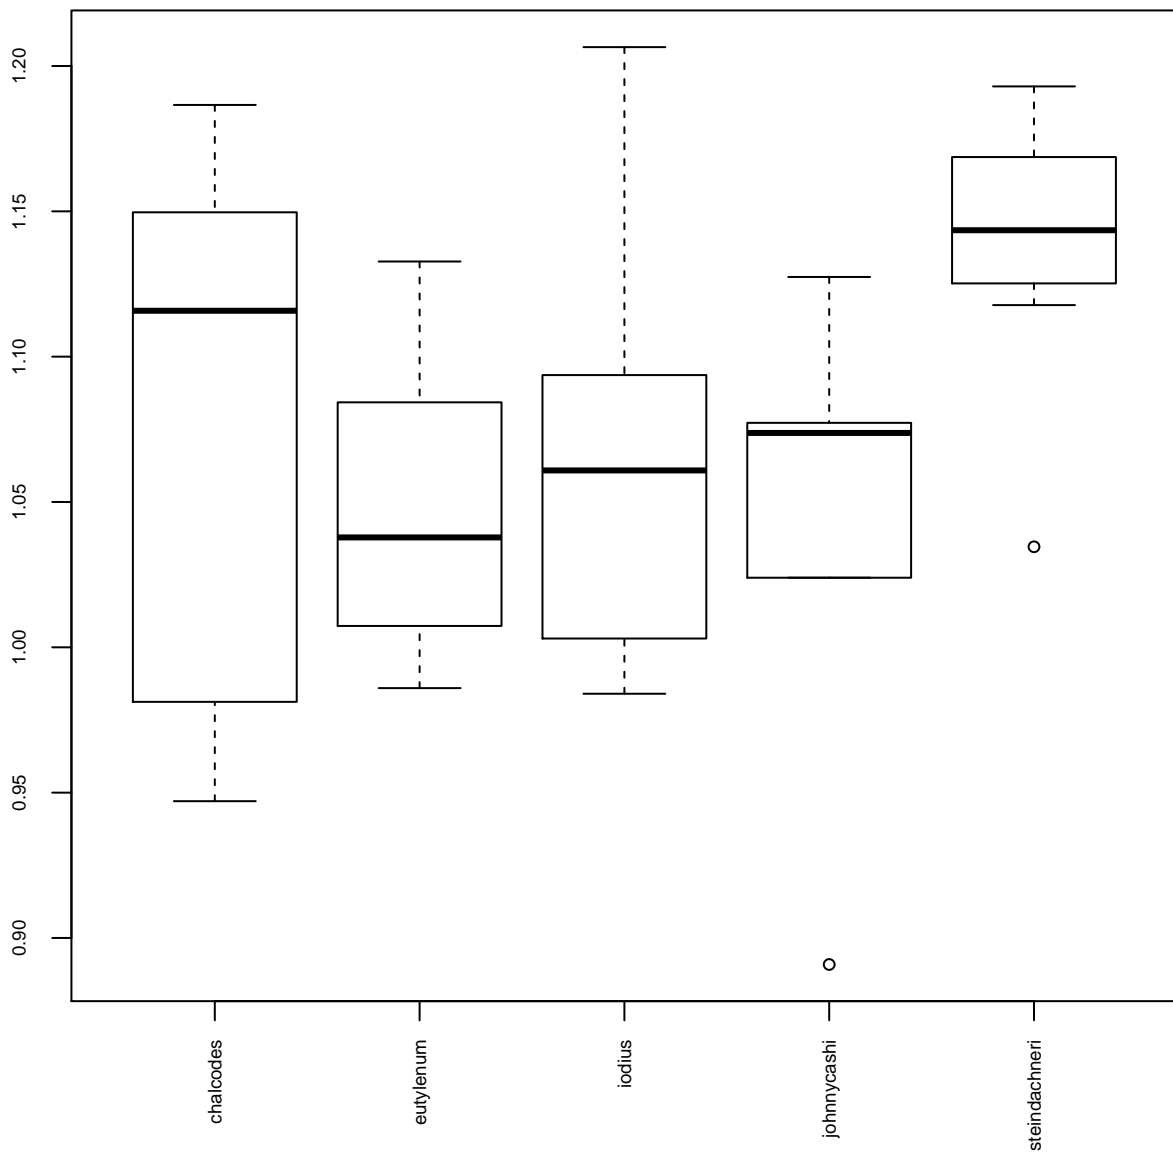

Supplement: Supplementary file 605

## Tibia 3/Metatarsus 4 Length ratio – females

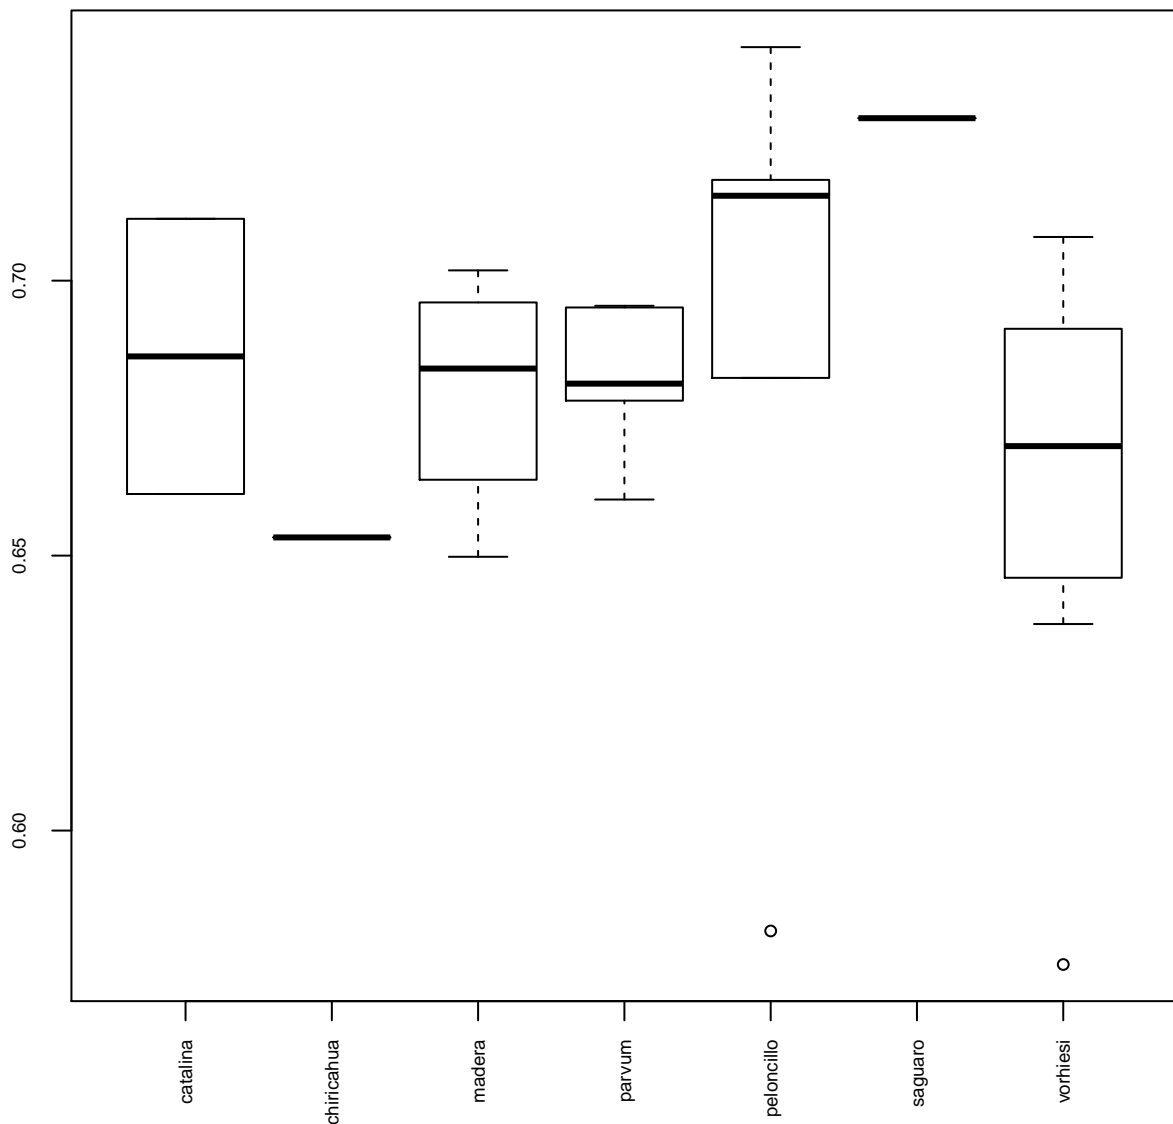

Supplement: Supplementary file 606

# Patella 1/Metatarsus 1 ratio – males

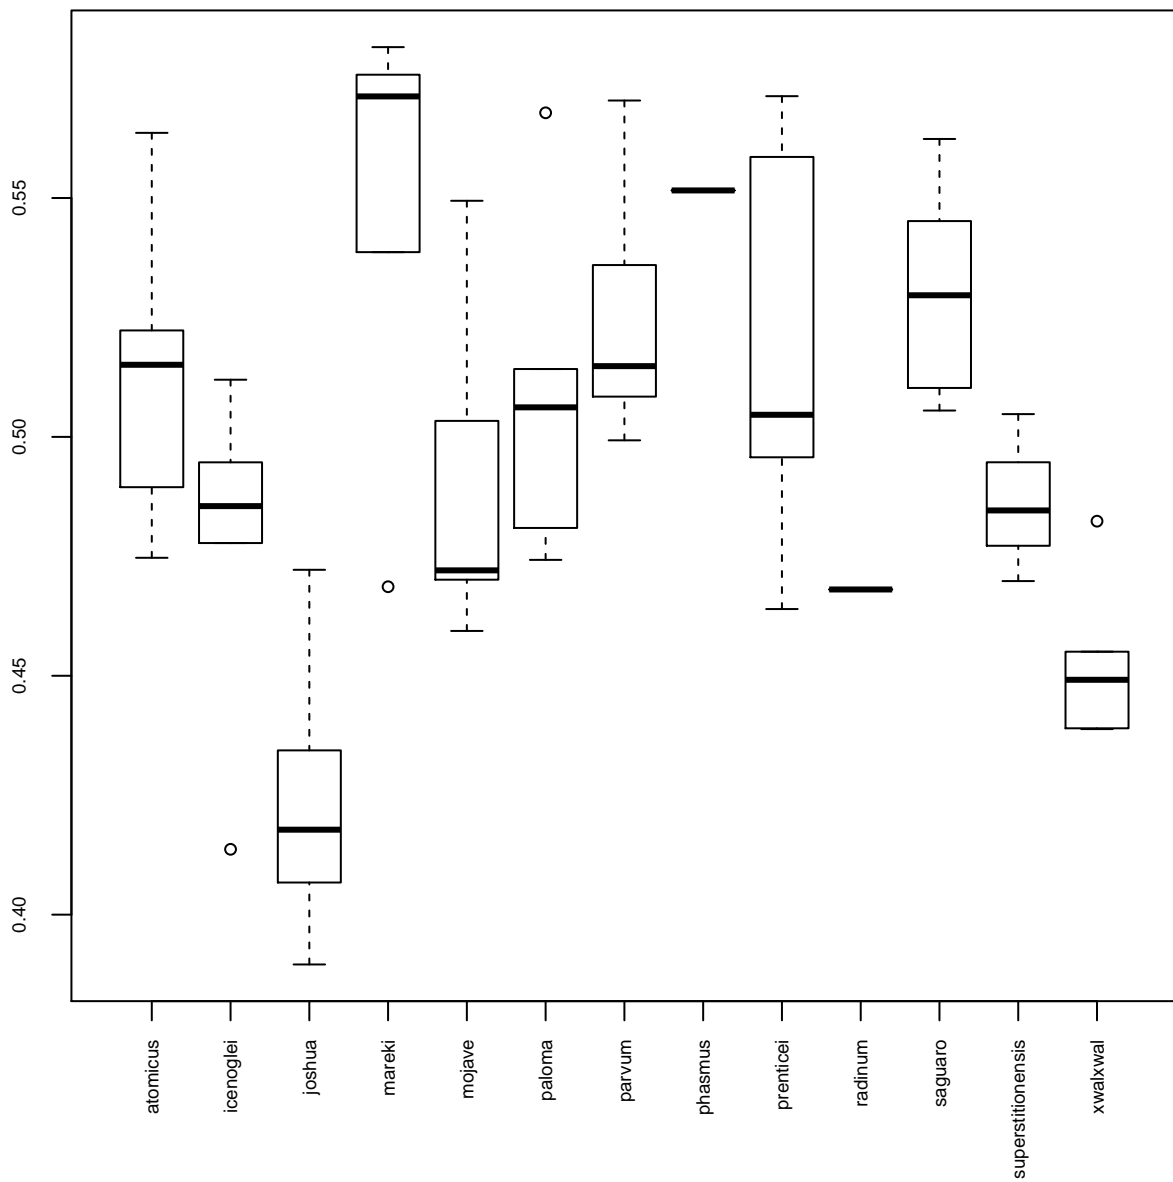

Supplement: Supplementary file 607

## Patella 3/Patella 4 ratio – females

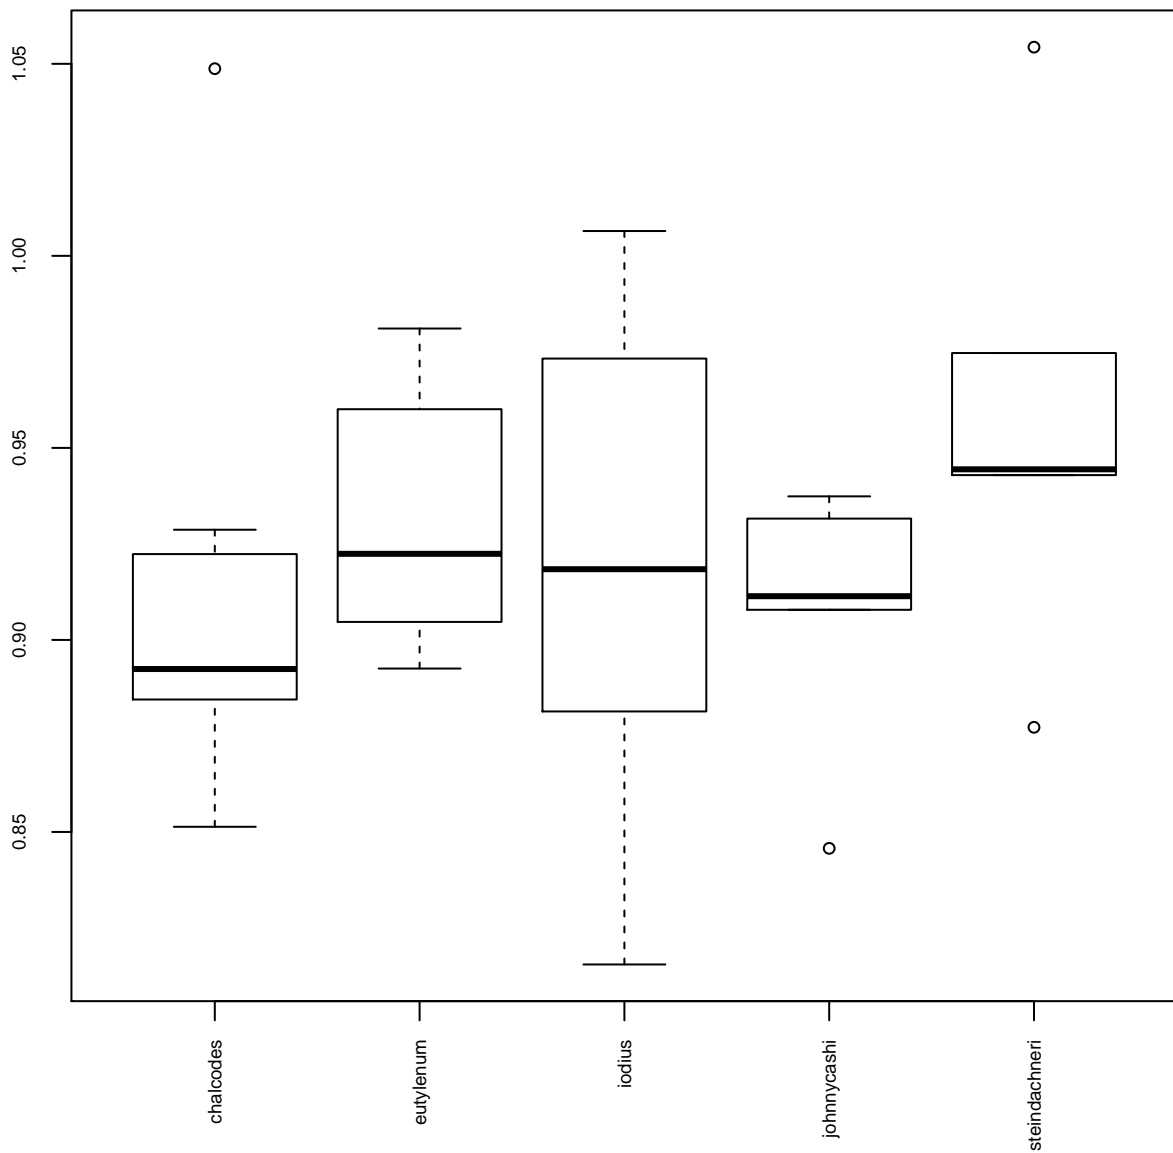

Supplement: Supplementary file 608

## Tibia 1/Patella 4 Length ratio – females

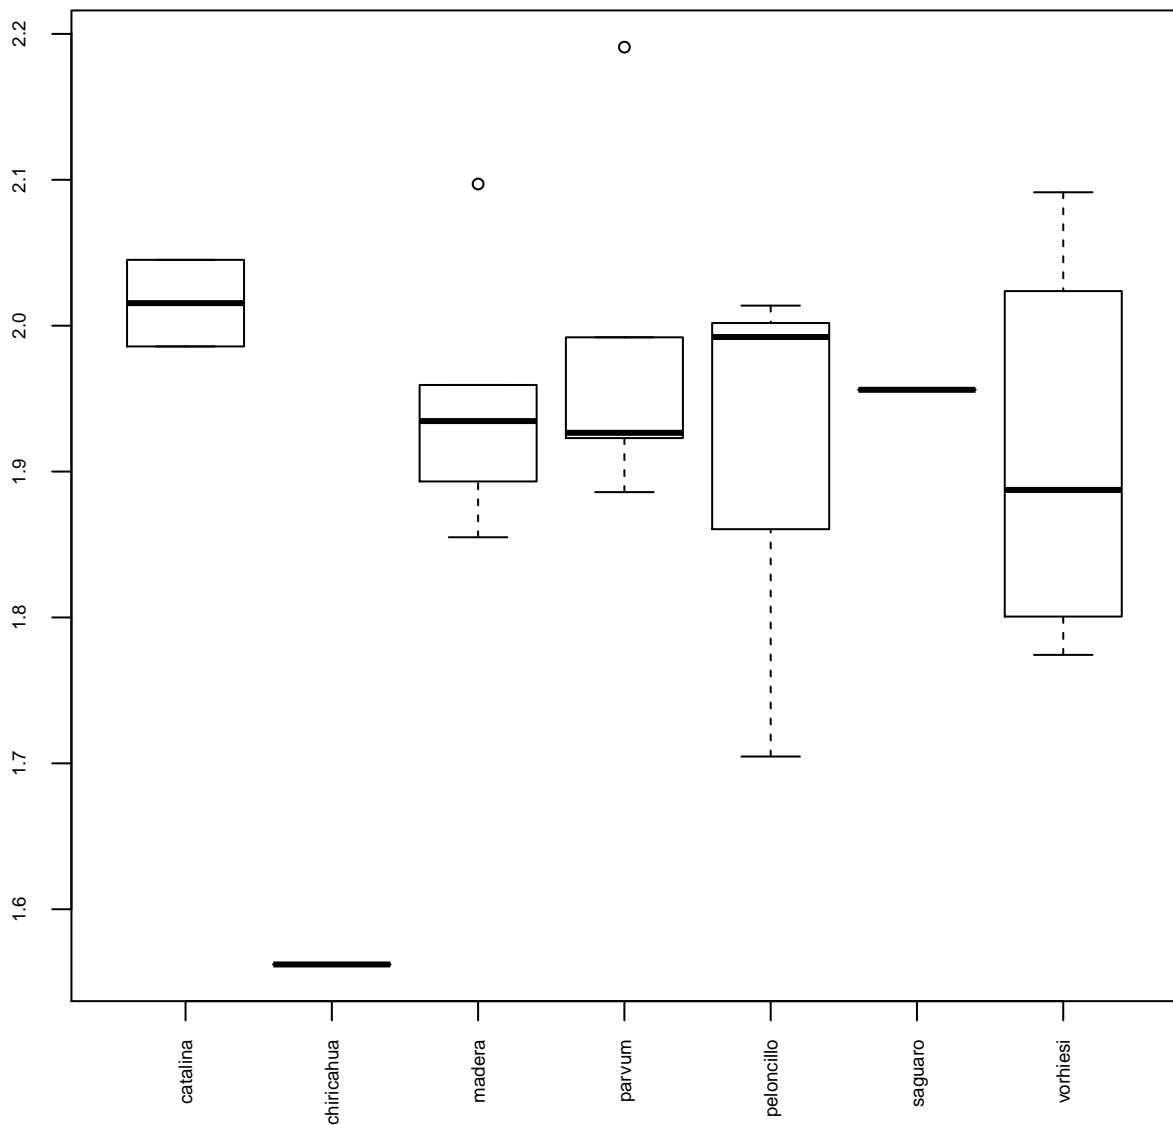

Supplement: Supplementary file 609

## Tarsus 1/Femur 3 Length ratio – females

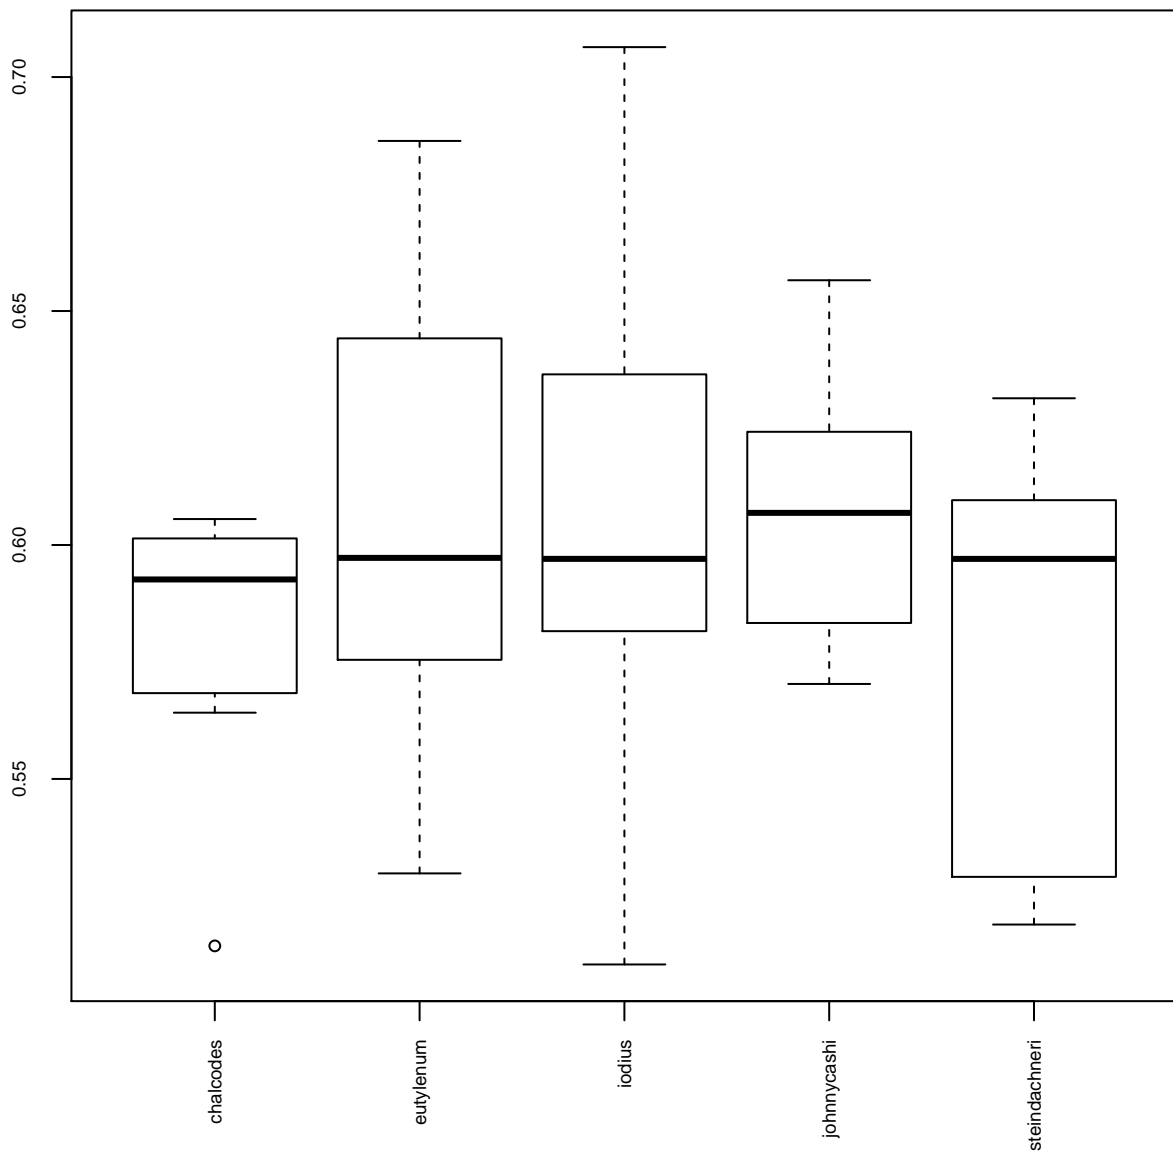

Supplement: Supplementary file 610

## Tibia 4/Metatarsus 4 ratio – males

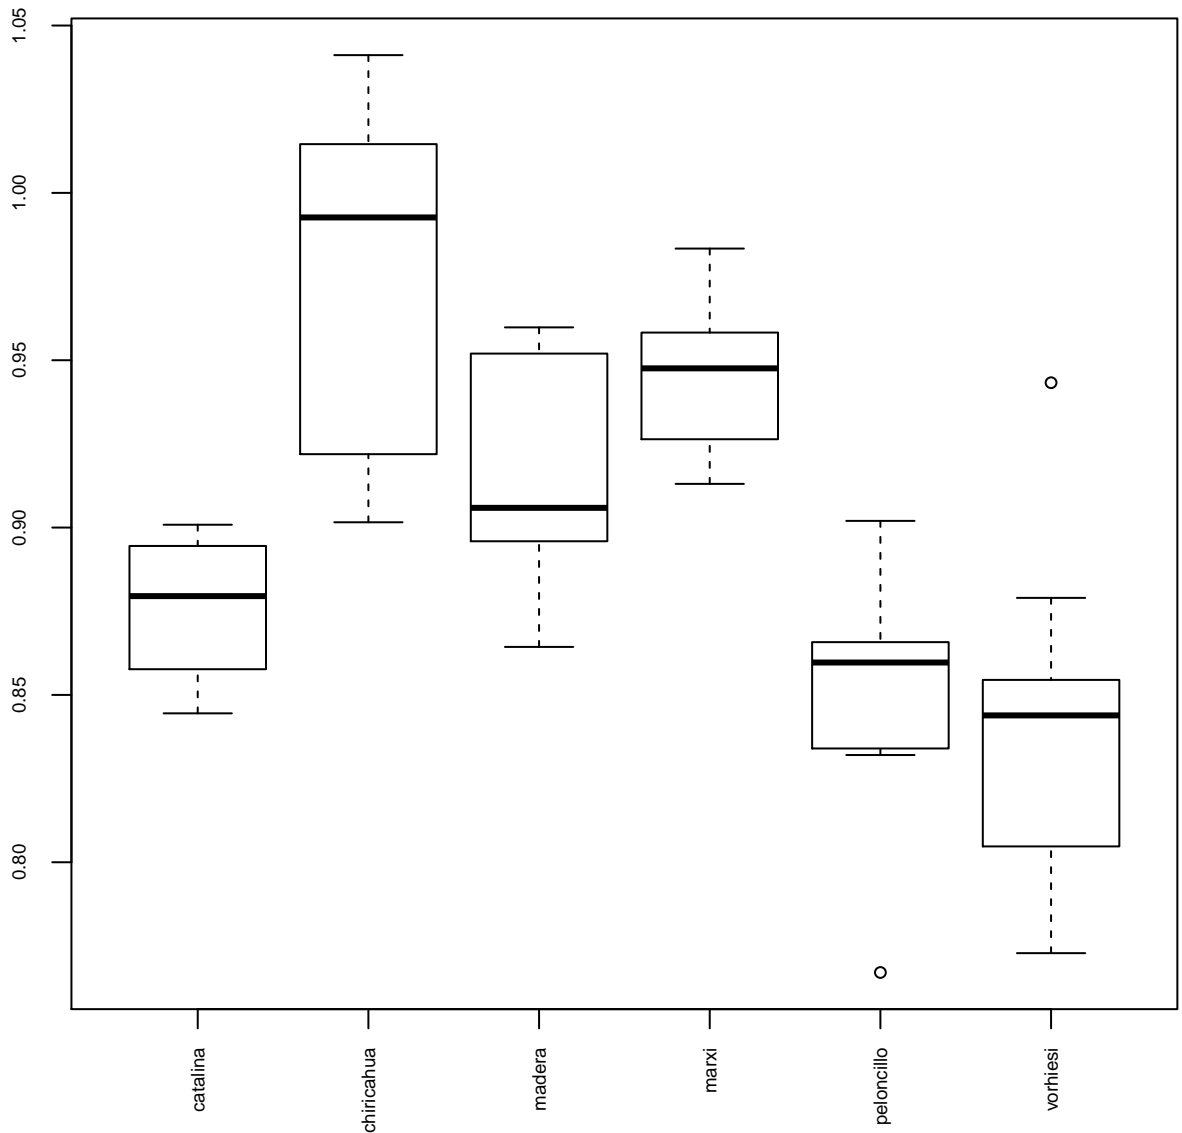

Supplement: Supplementary file 611

## Tarsus 3/Metatarsus 4 Length ratio – males

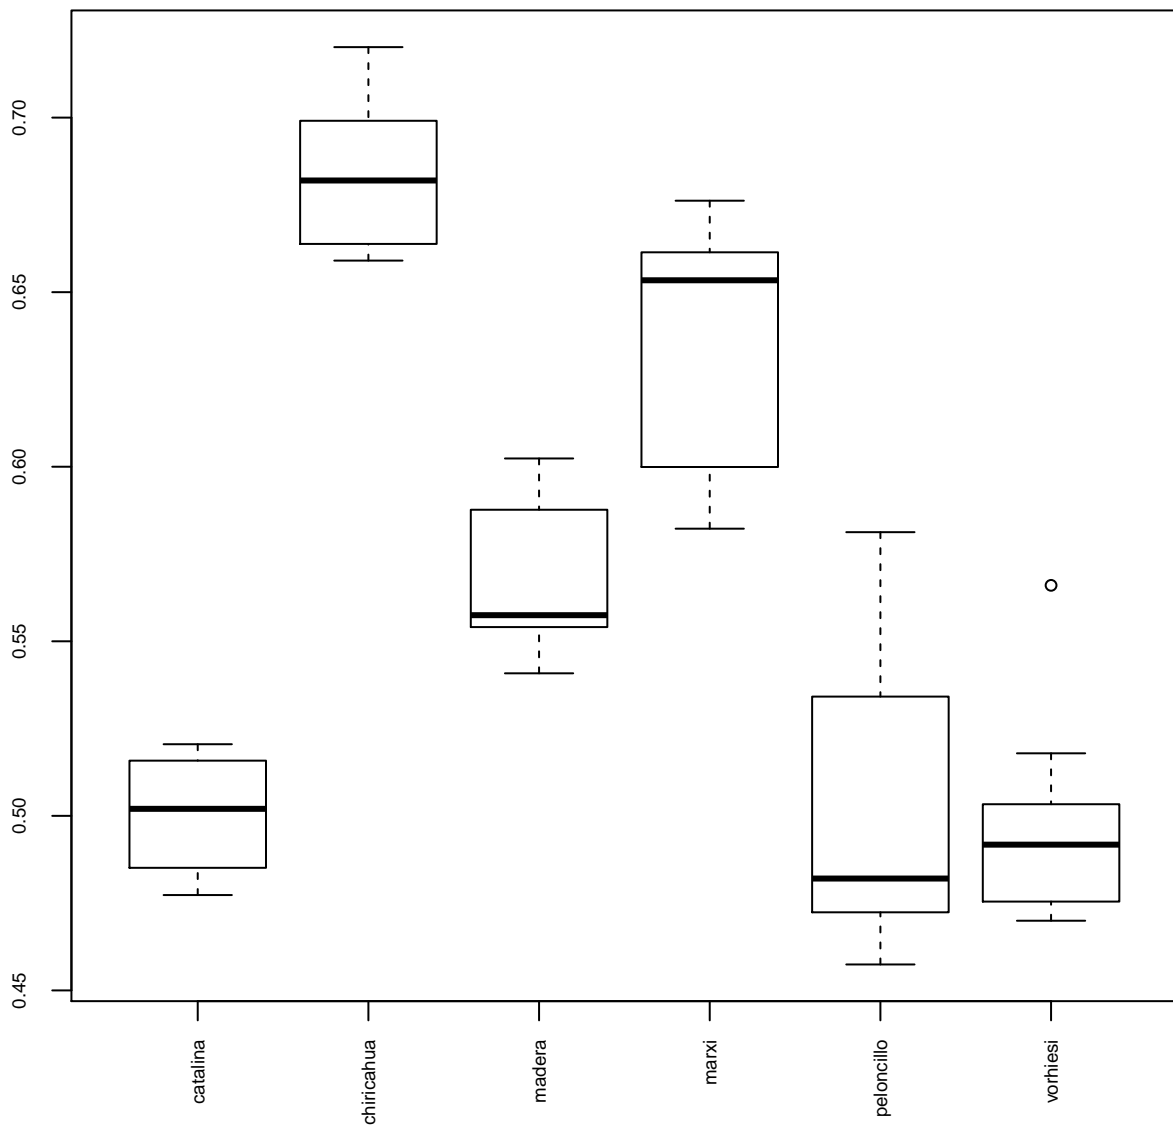

Supplement: Supplementary file 612

## Patella 1/Tarsus 1 ratio – females

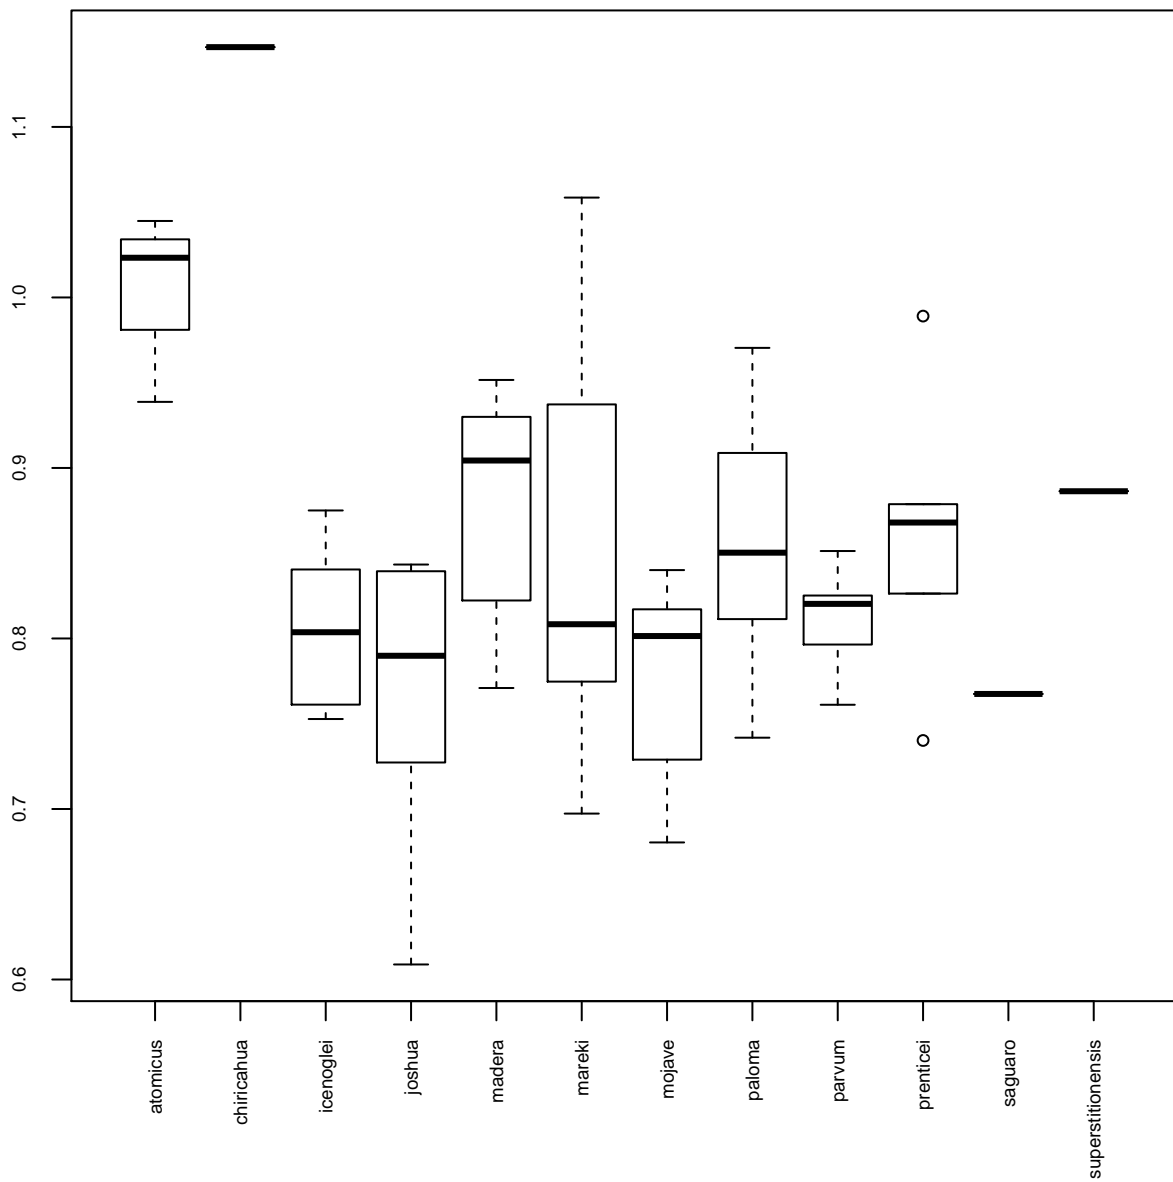

Supplement: Supplementary file 613

# Tarsus 1/Metatarsus 4 Length ratio – females

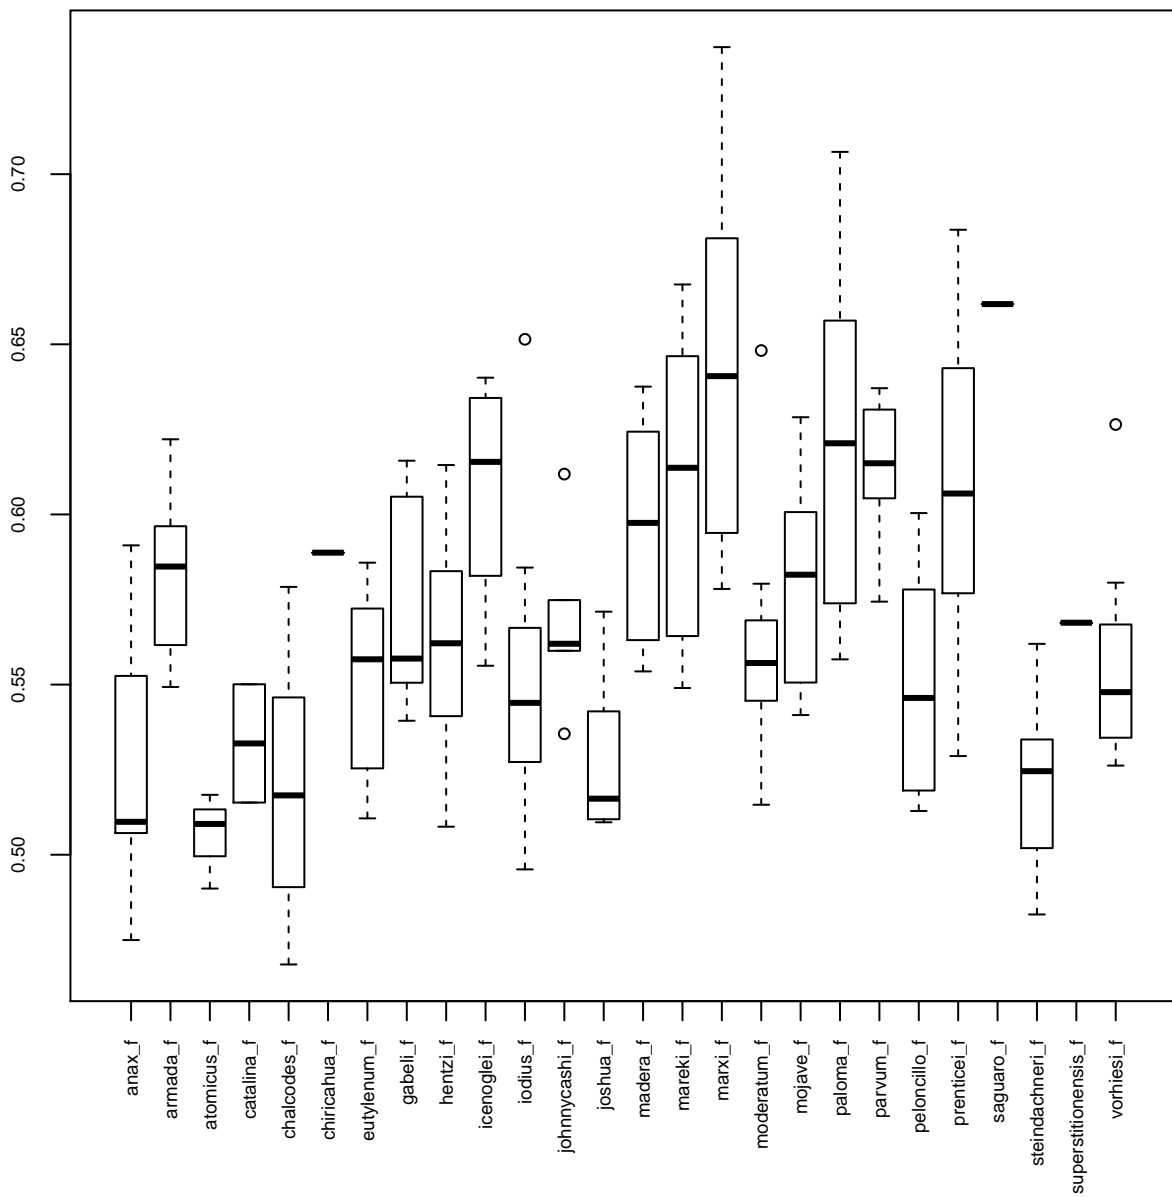

Supplement: Supplementary file 614

## Femur 1/Tarsus 1 ratio – males

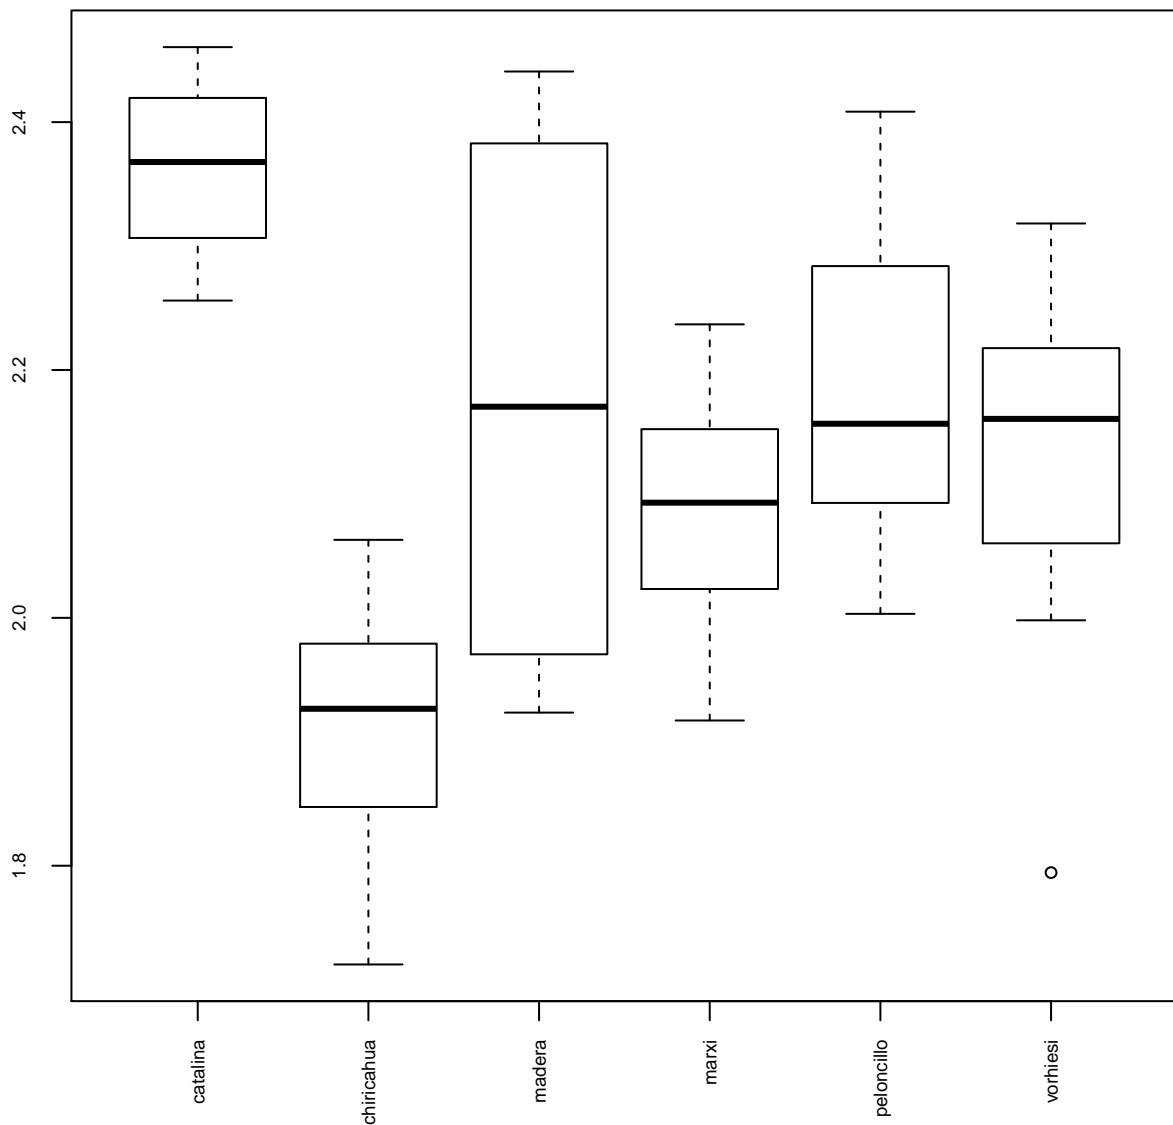

Supplement: Supplementary file 615

## Patella 3/Tarsus 4 Length ratio – females

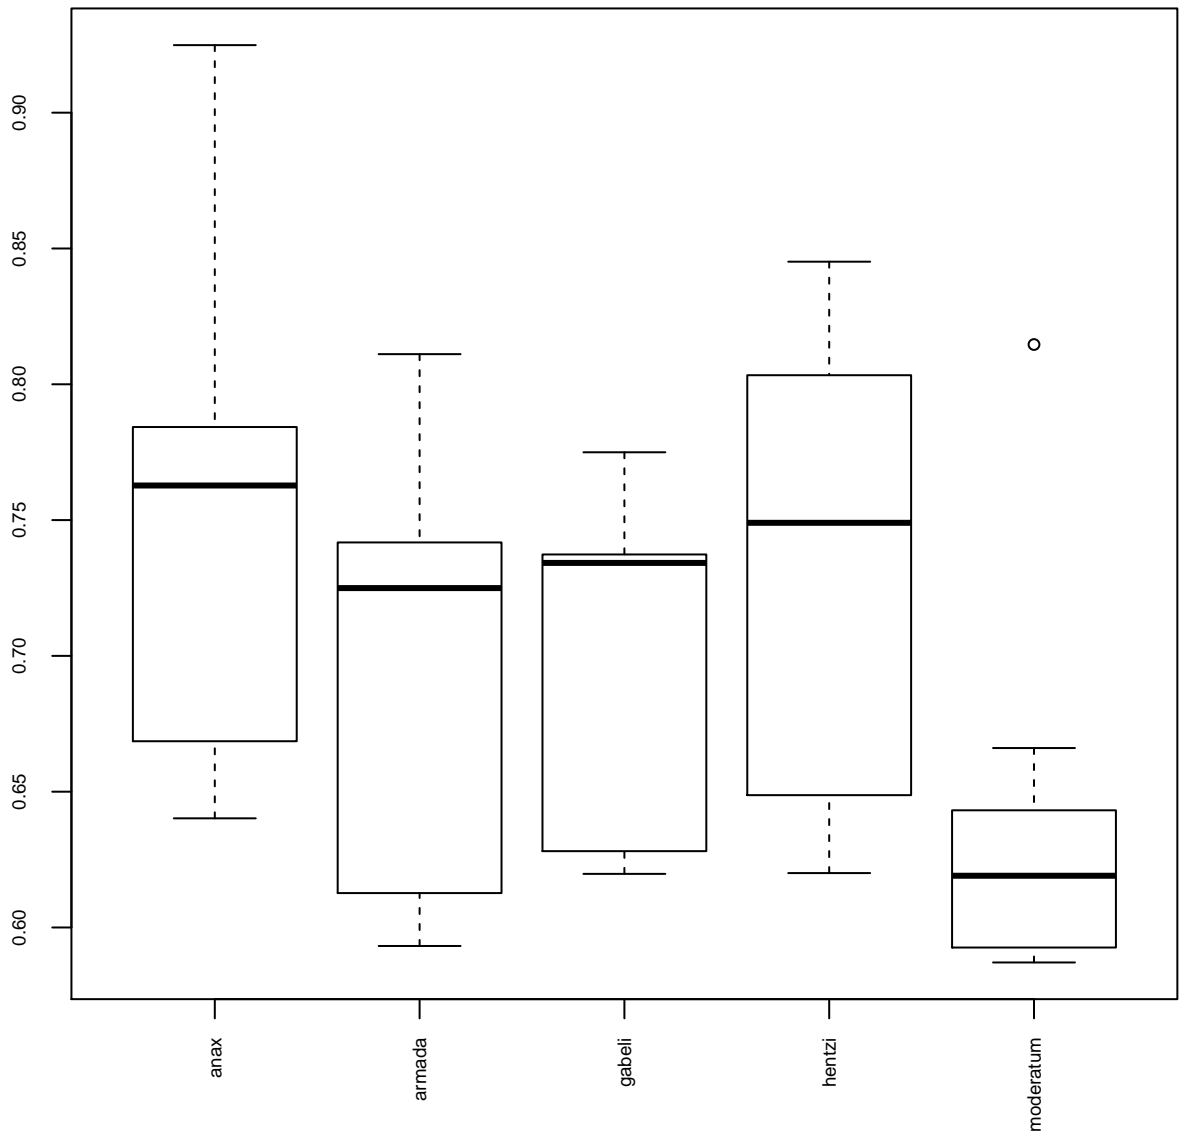

Supplement: Supplementary file 616

## Femur 4/Metatarsus 4 ratio – males

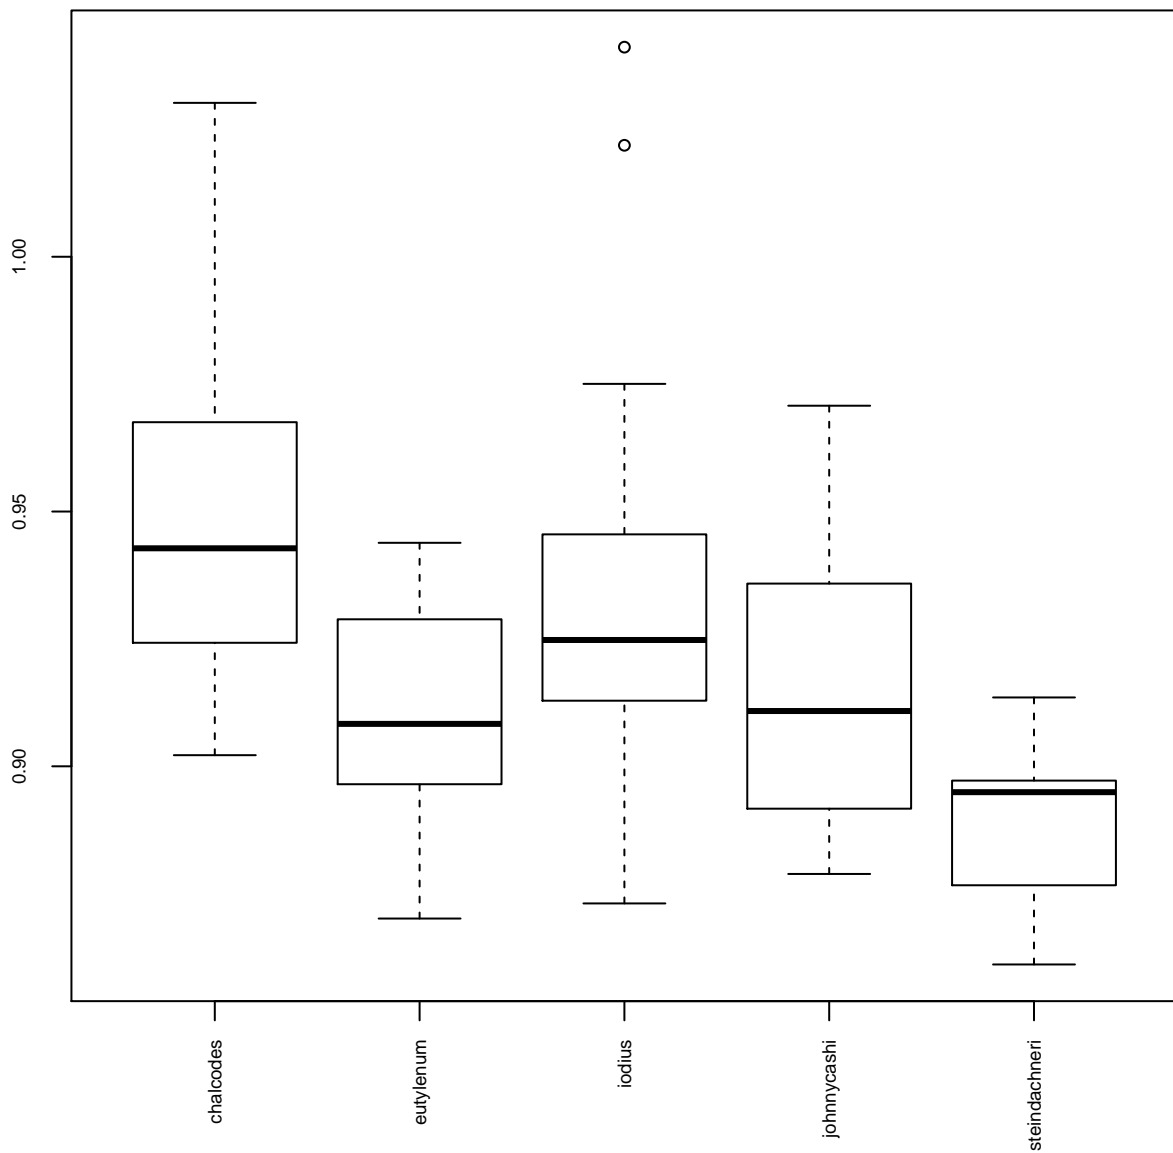

Supplement: Supplementary file 617

## Patella 1/Patella 3 ratio – males

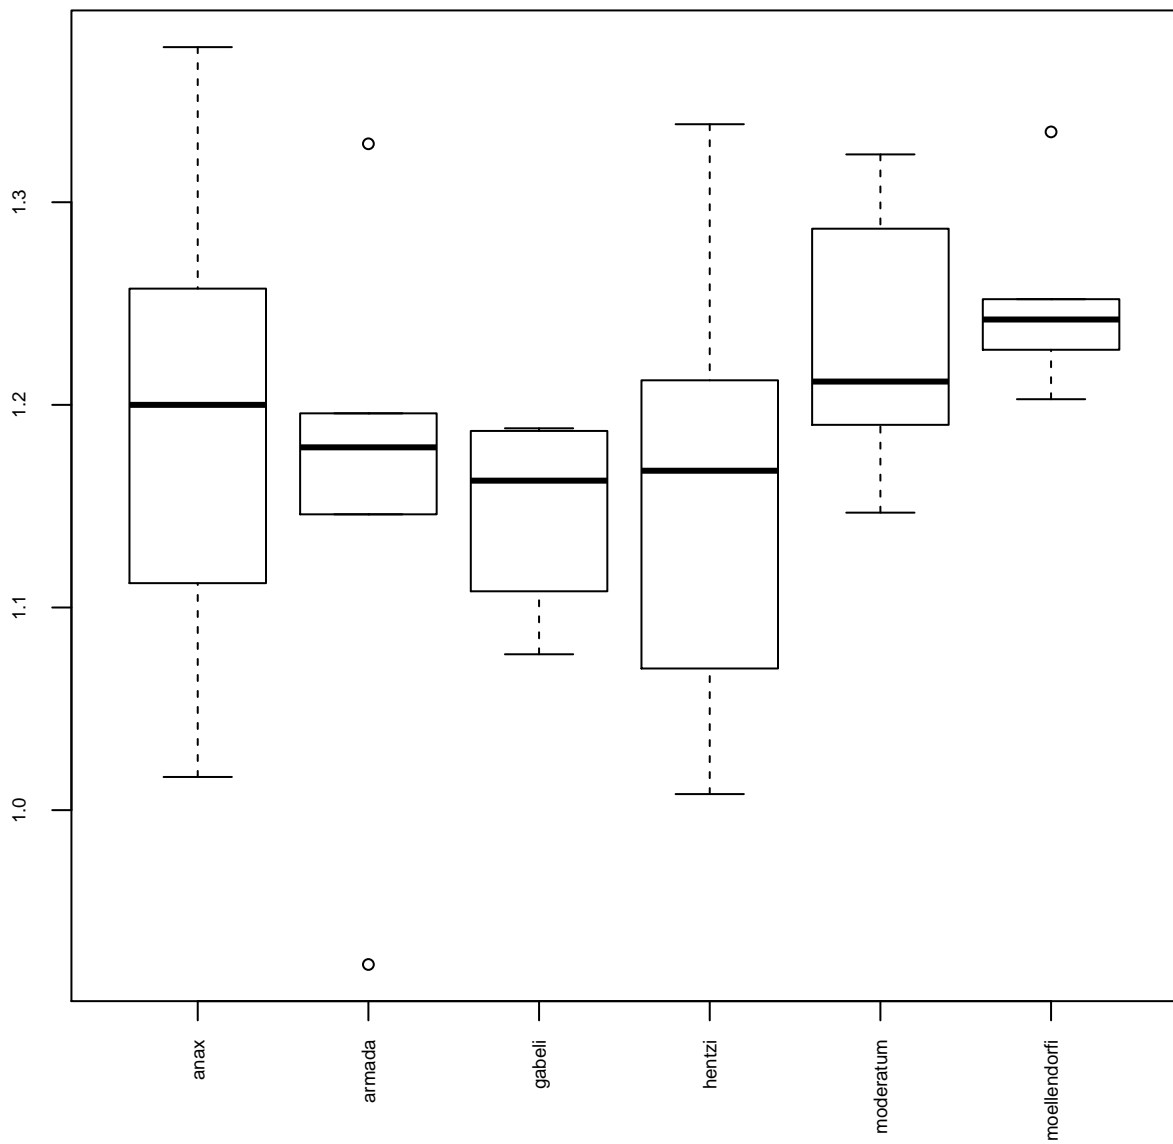

Supplement: Supplementary file 618

## Femur 1 Length/Width ratio – males

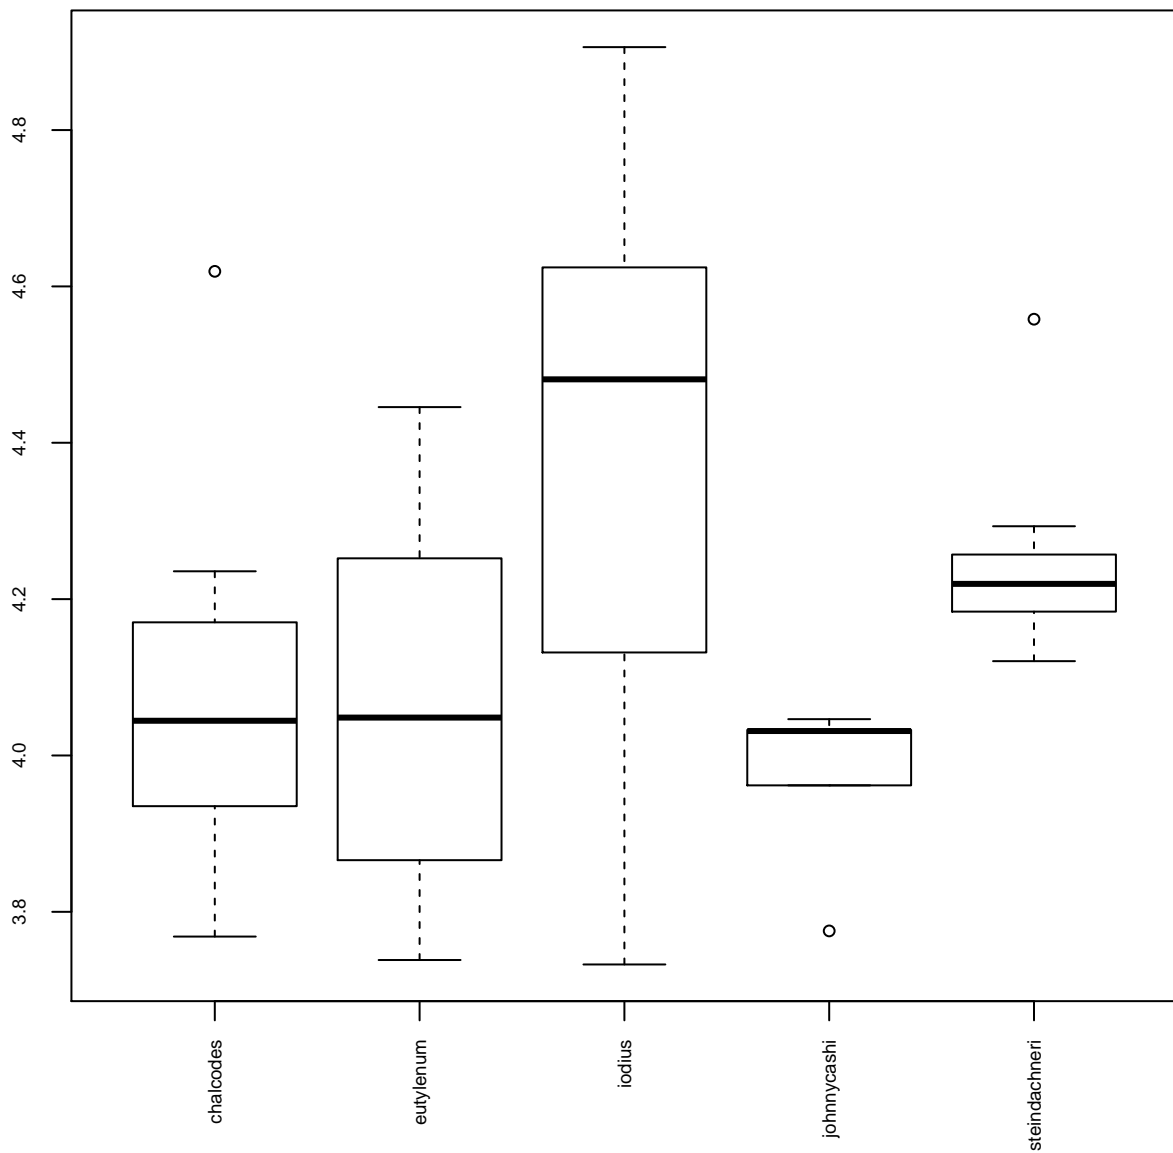

Supplement: Supplementary file 619

## Carapace Length/Metatarsus 3 ratio – males

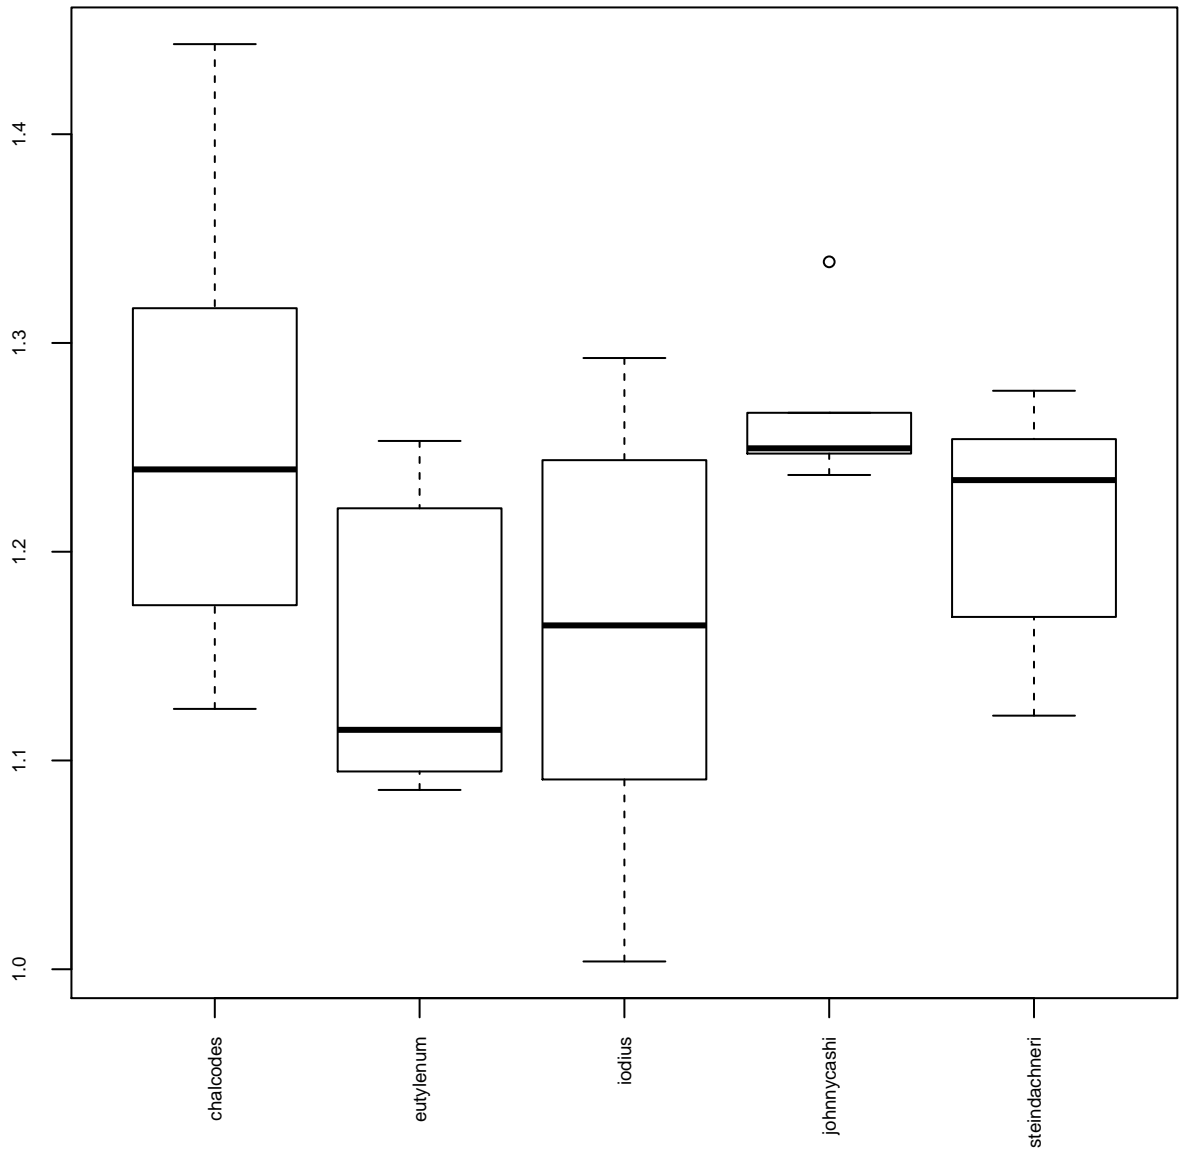

Supplement: Supplementary file 620

## Patella 1/Tarsus 1 ratio – females

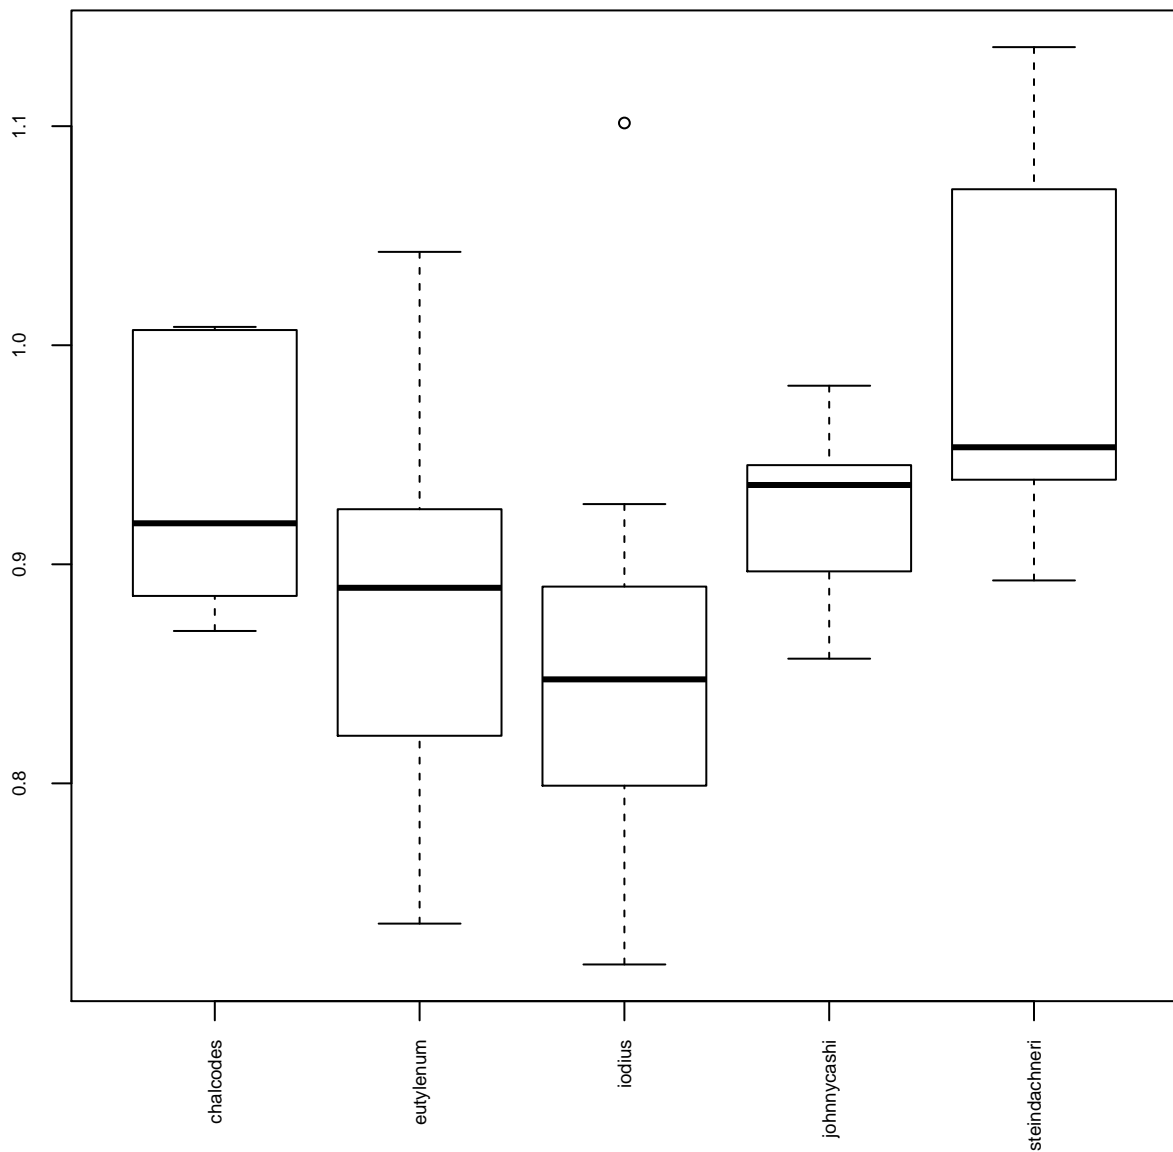

Supplement: Supplementary file 621

## Tibia 3/Metatarsus 4 Length ratio – males

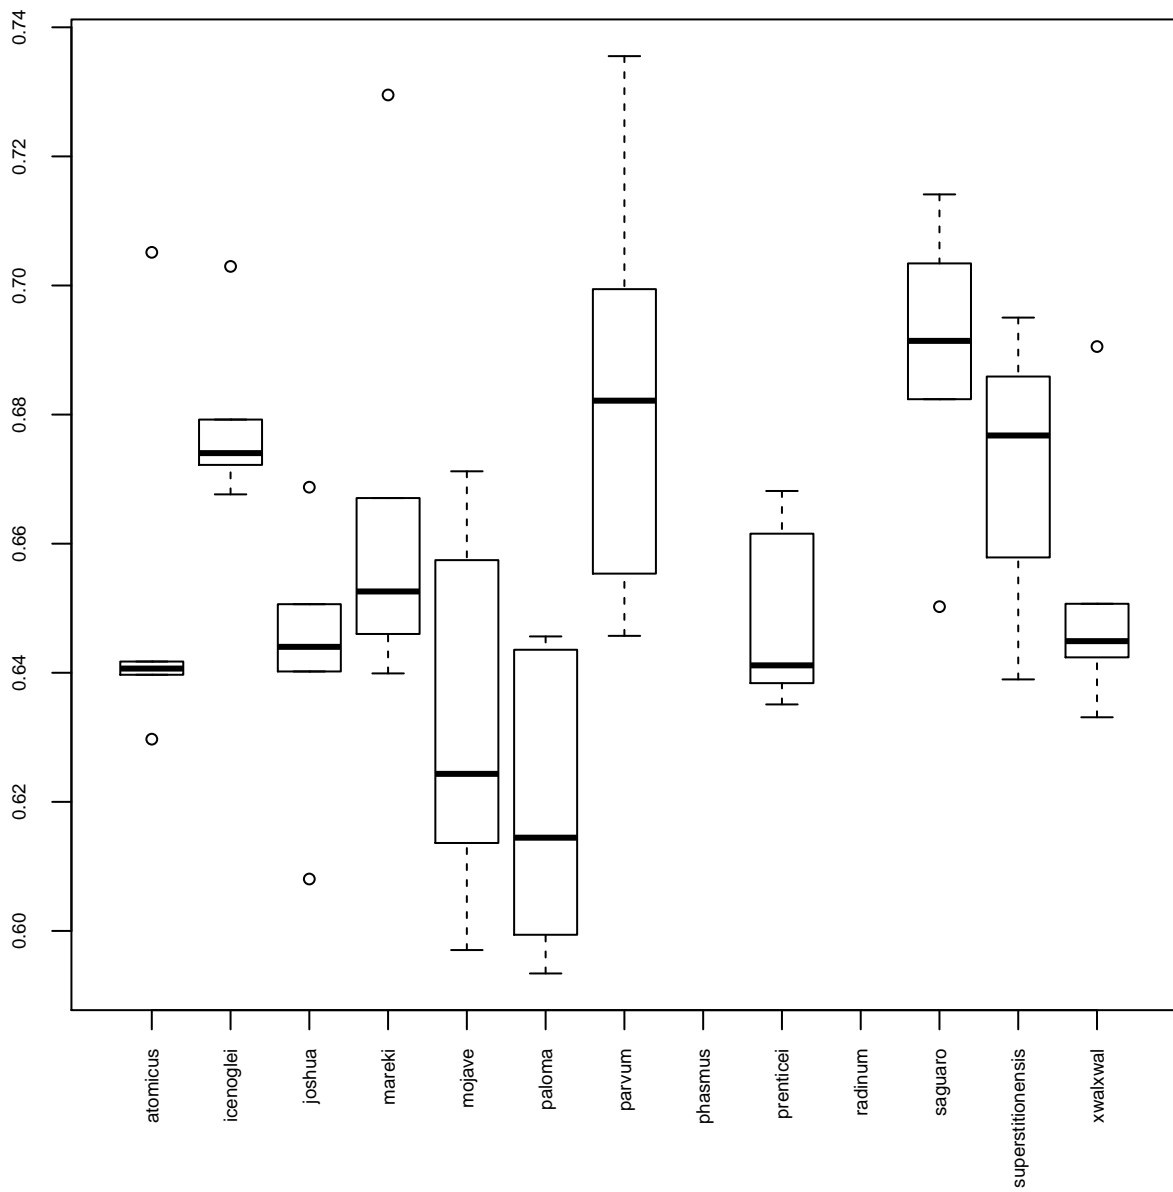

Supplement: Supplementary file 622

## Leg 1/Leg 3 Length ratio – females

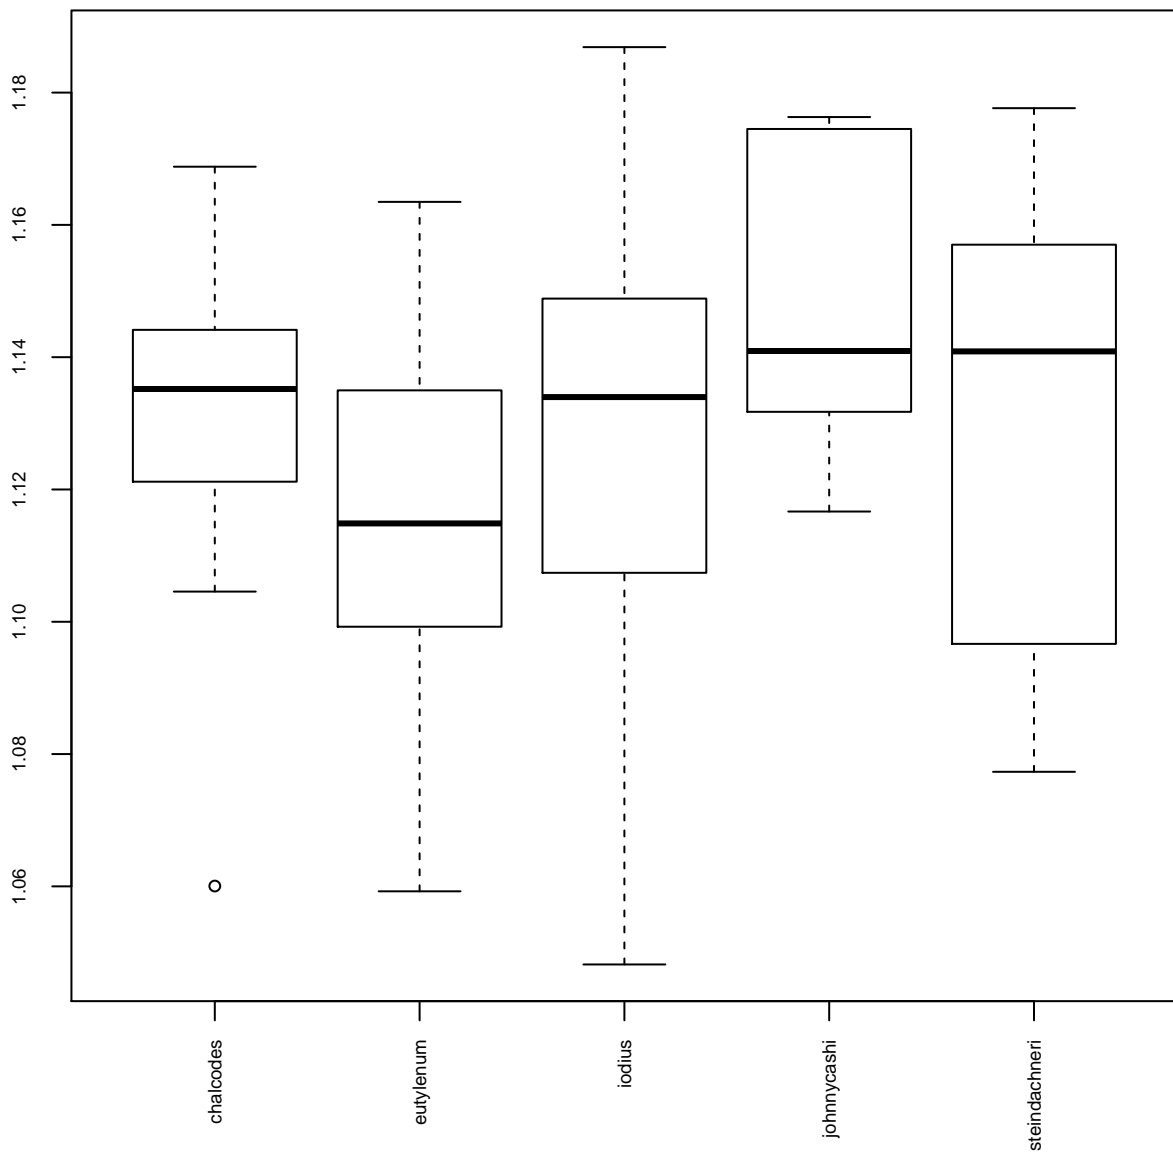

Supplement: Supplementary file 623

## Tarsus 1/Femur 3 Length ratio – males

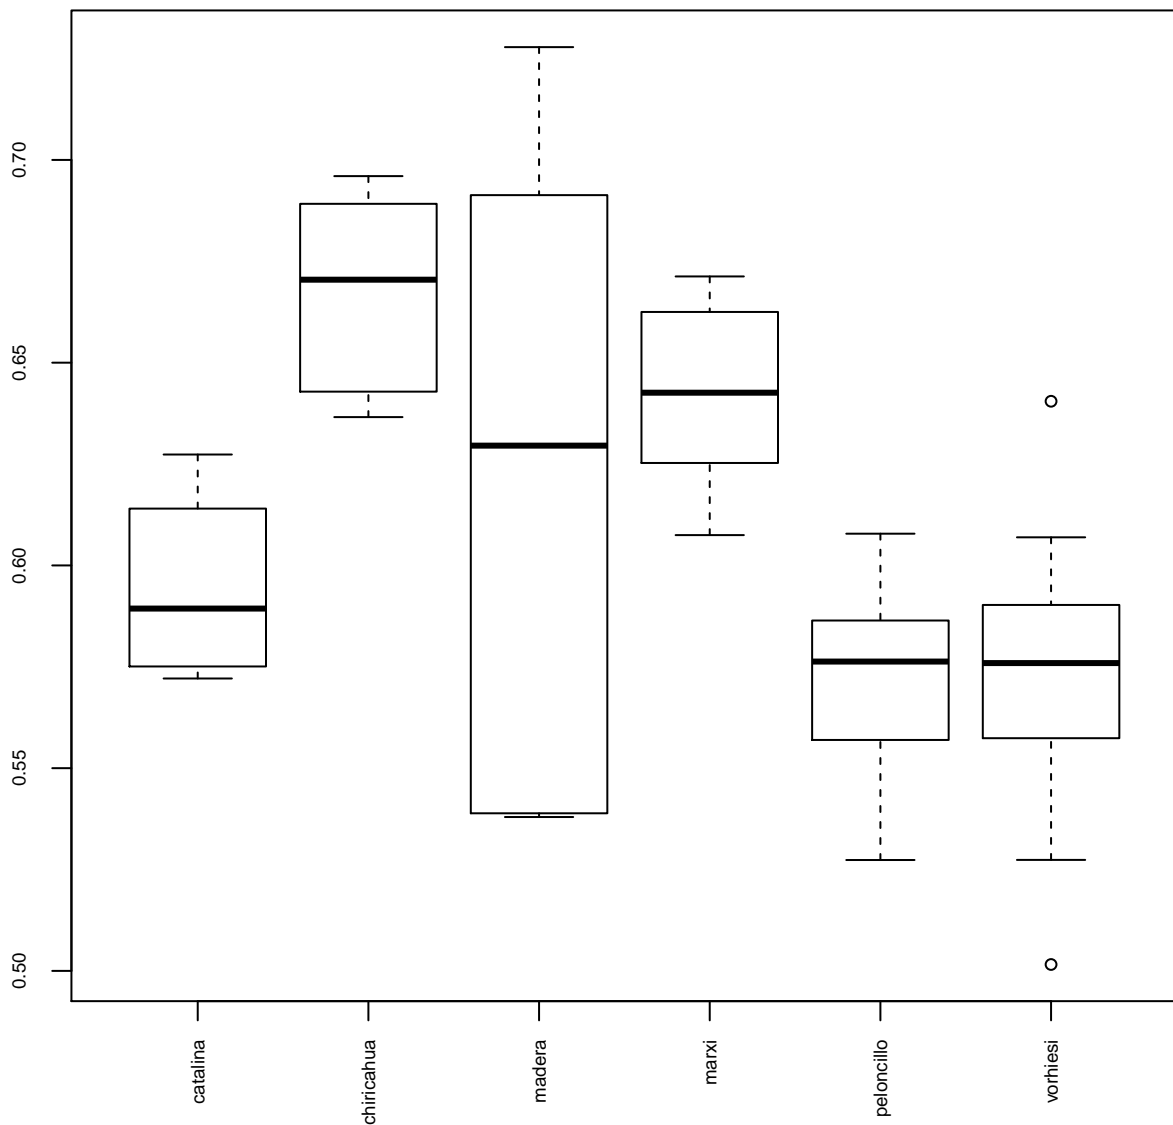

Supplement: Supplementary file 624

# Palpal Tibia/Metatarsus 4 Length ratio – males

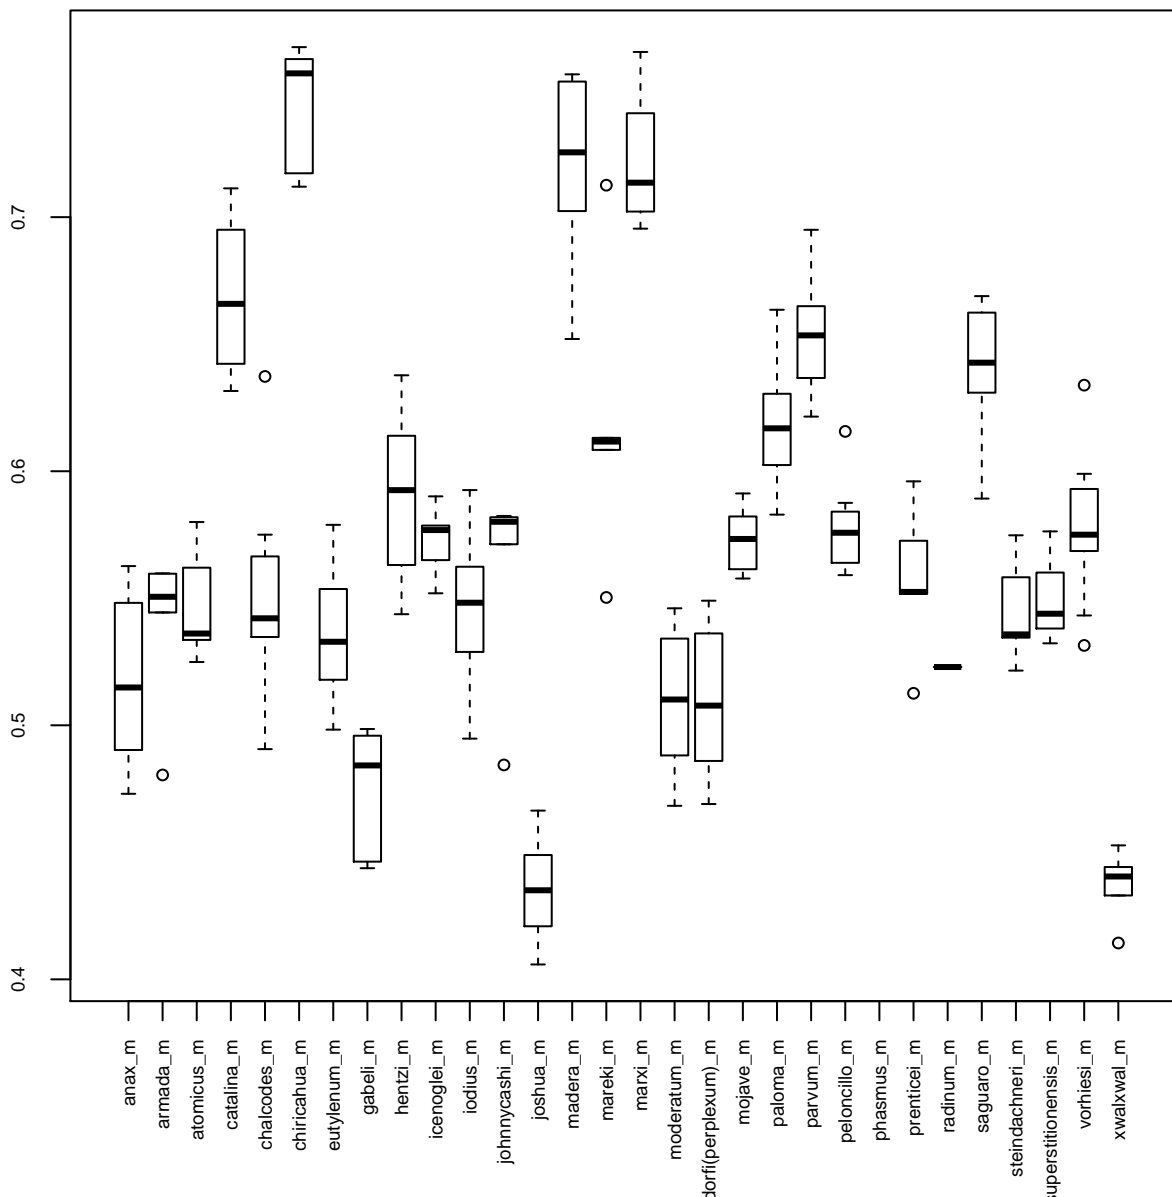

Supplement: Supplementary file 625

## Palpal Tibia/Tarsus 4 Length ratio – males

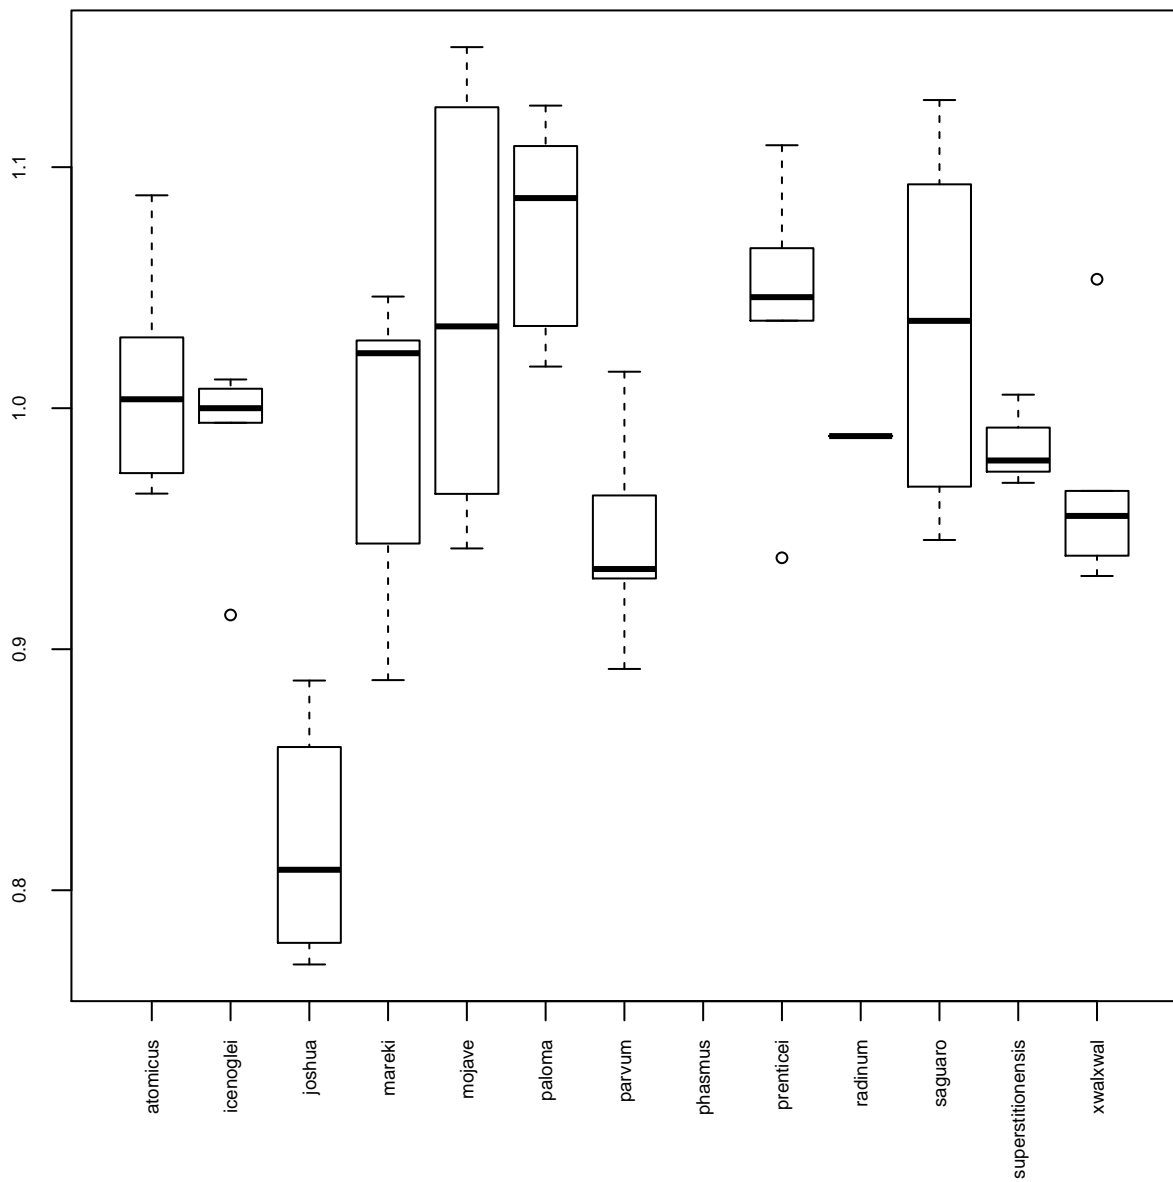

Supplement: Supplementary file 626

# Palpal Tibia/Femur 1 Length ratio – males

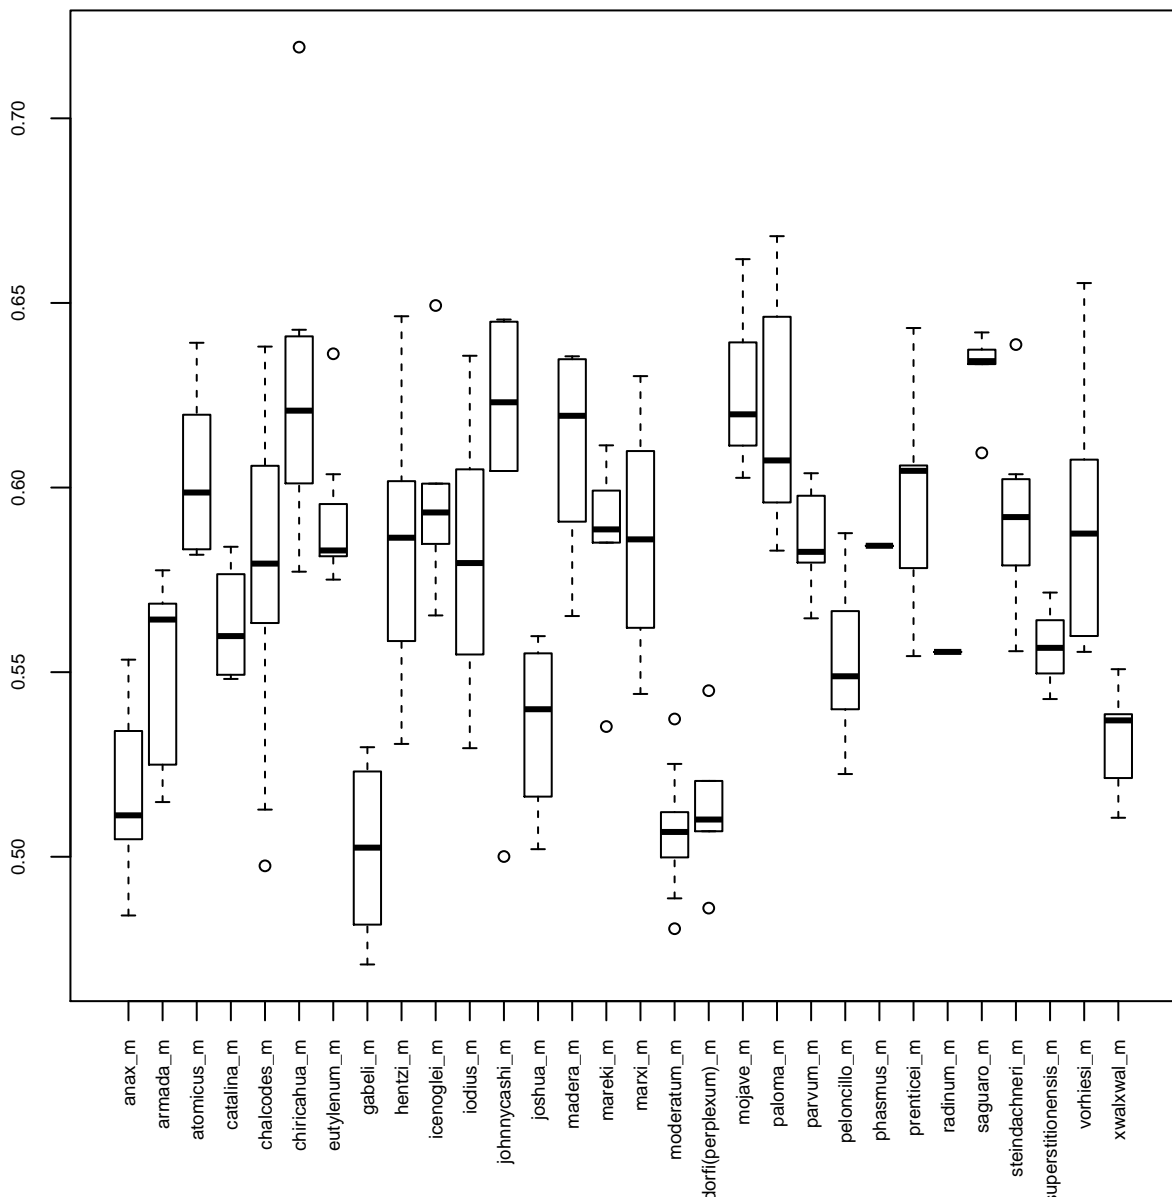

Supplement: Supplementary file 627

# Leg 1 Length/Carapace Length ratio – males

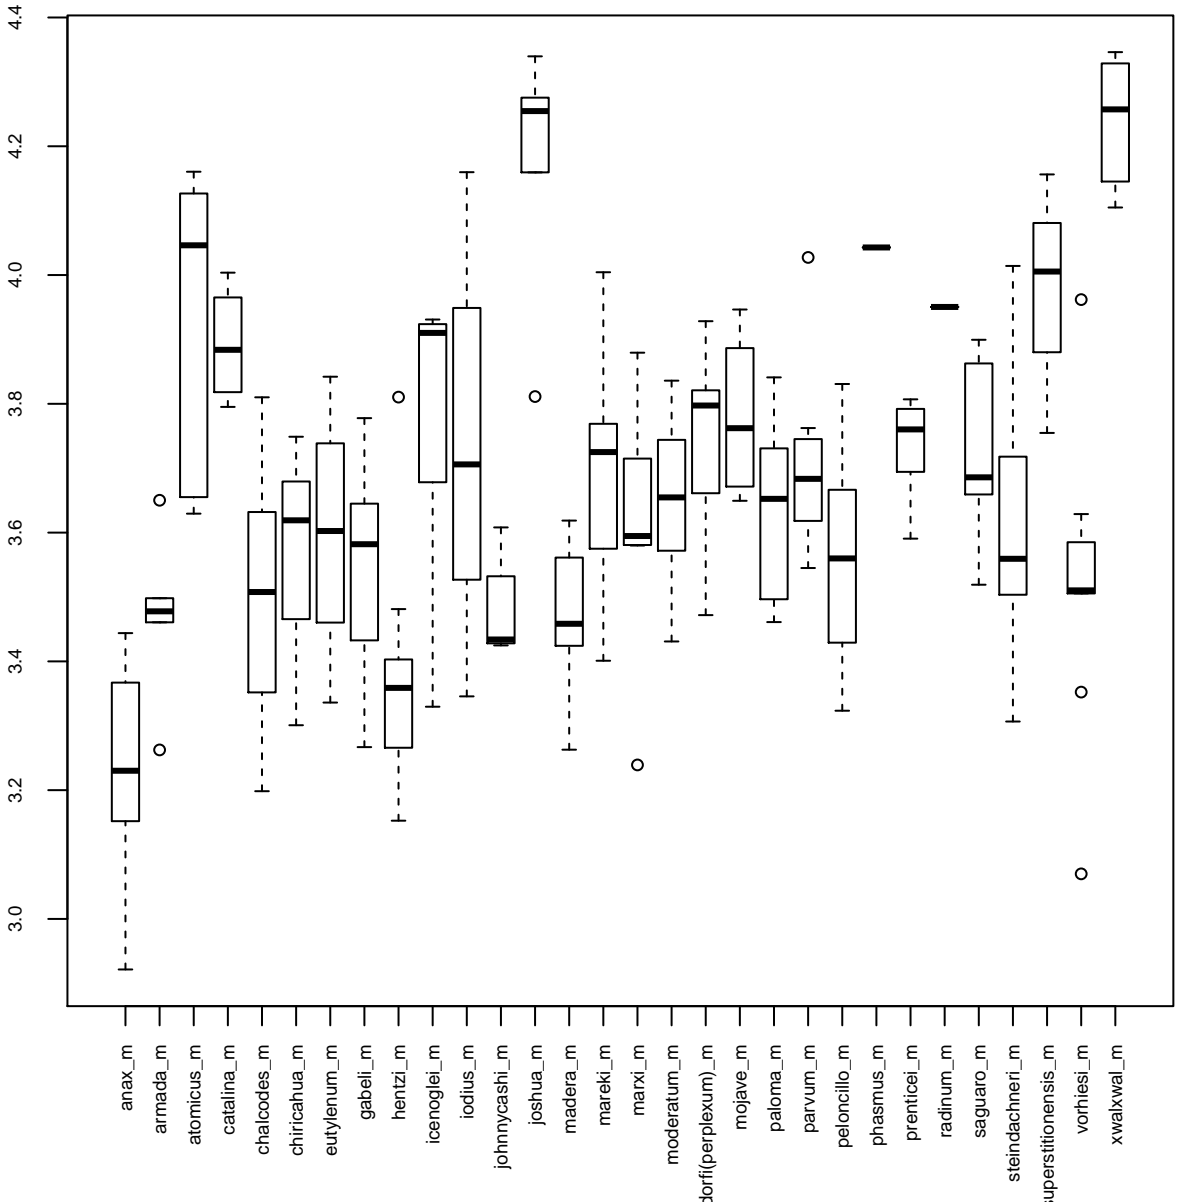

Supplement: Supplementary file 628

# Metatarsus 3/Metatarsus 4 ratio – males

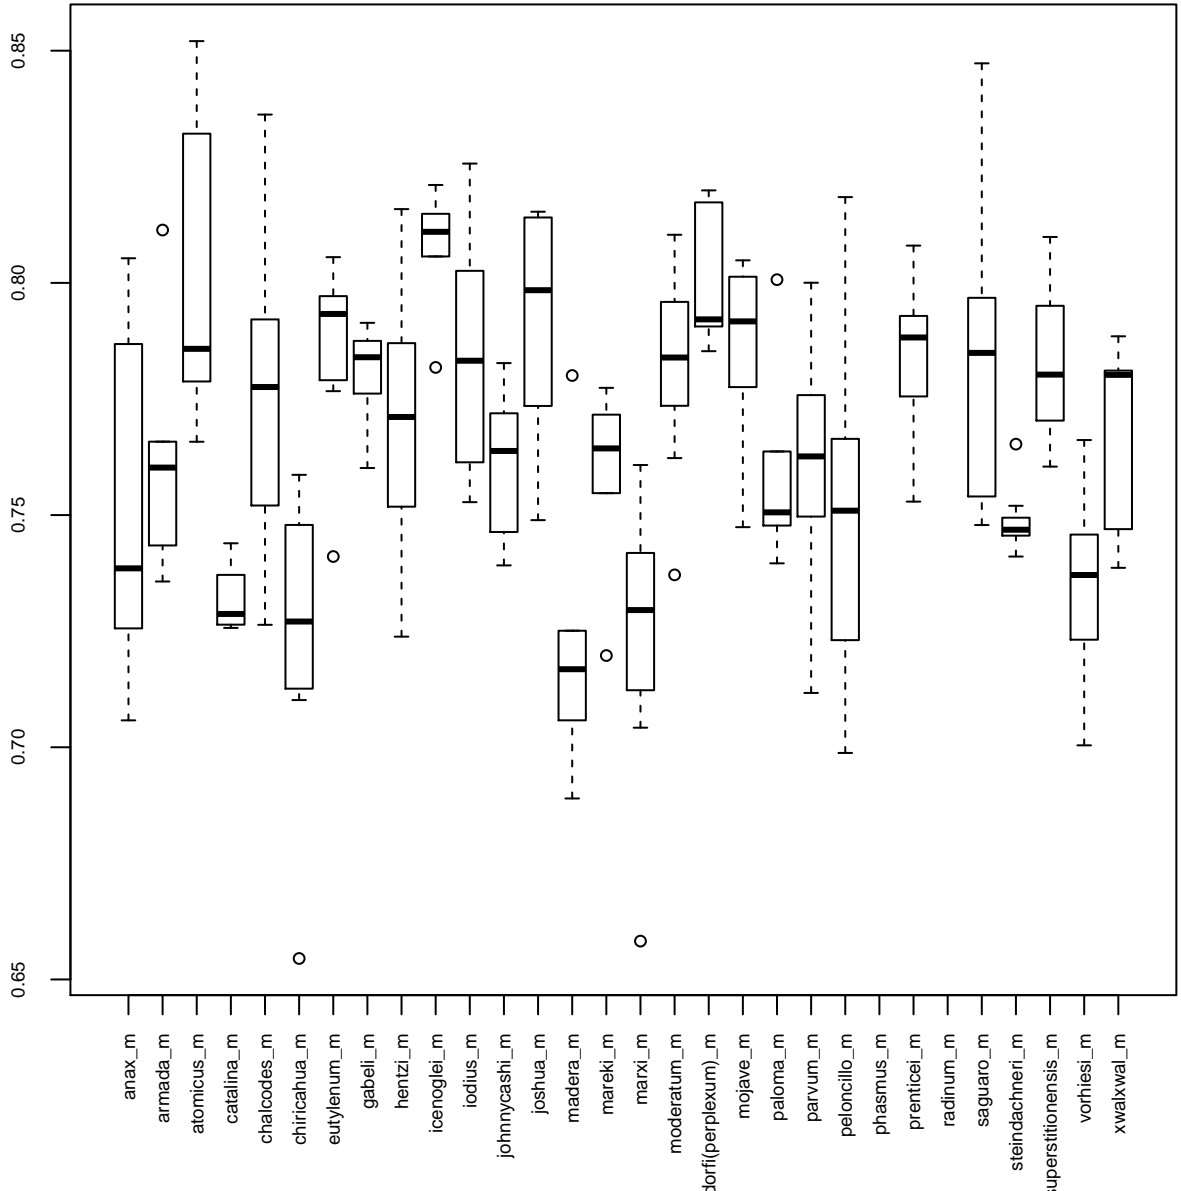

Supplement: Supplementary file 629

## Femur 1/Tarsus 4 ratio – females

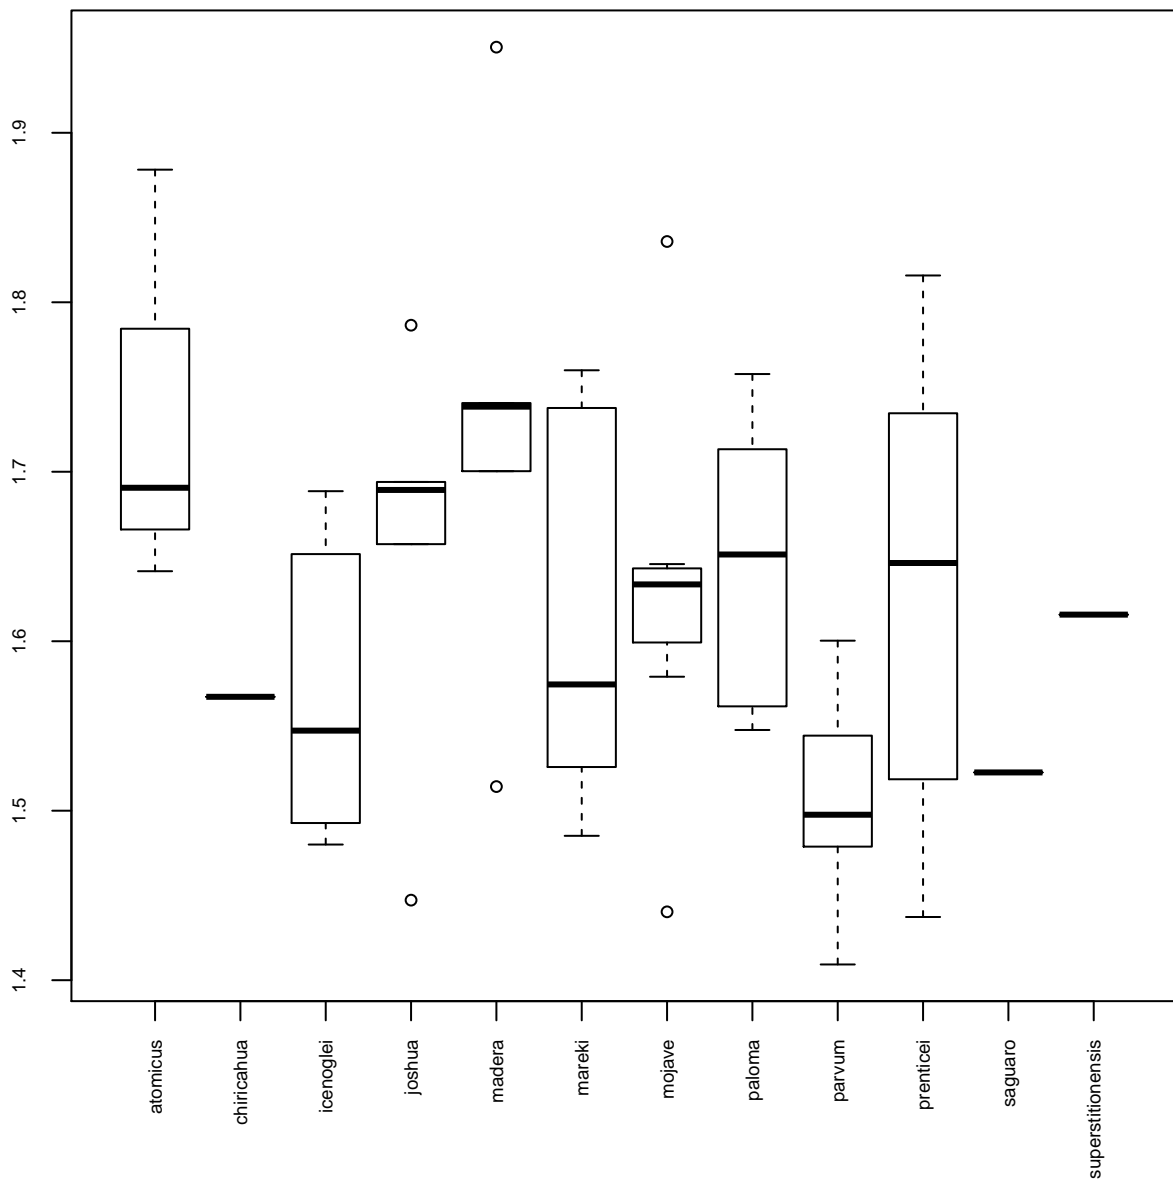

Supplement: Supplementary file 630

# Patella 1/Tibia 1 ratio – males

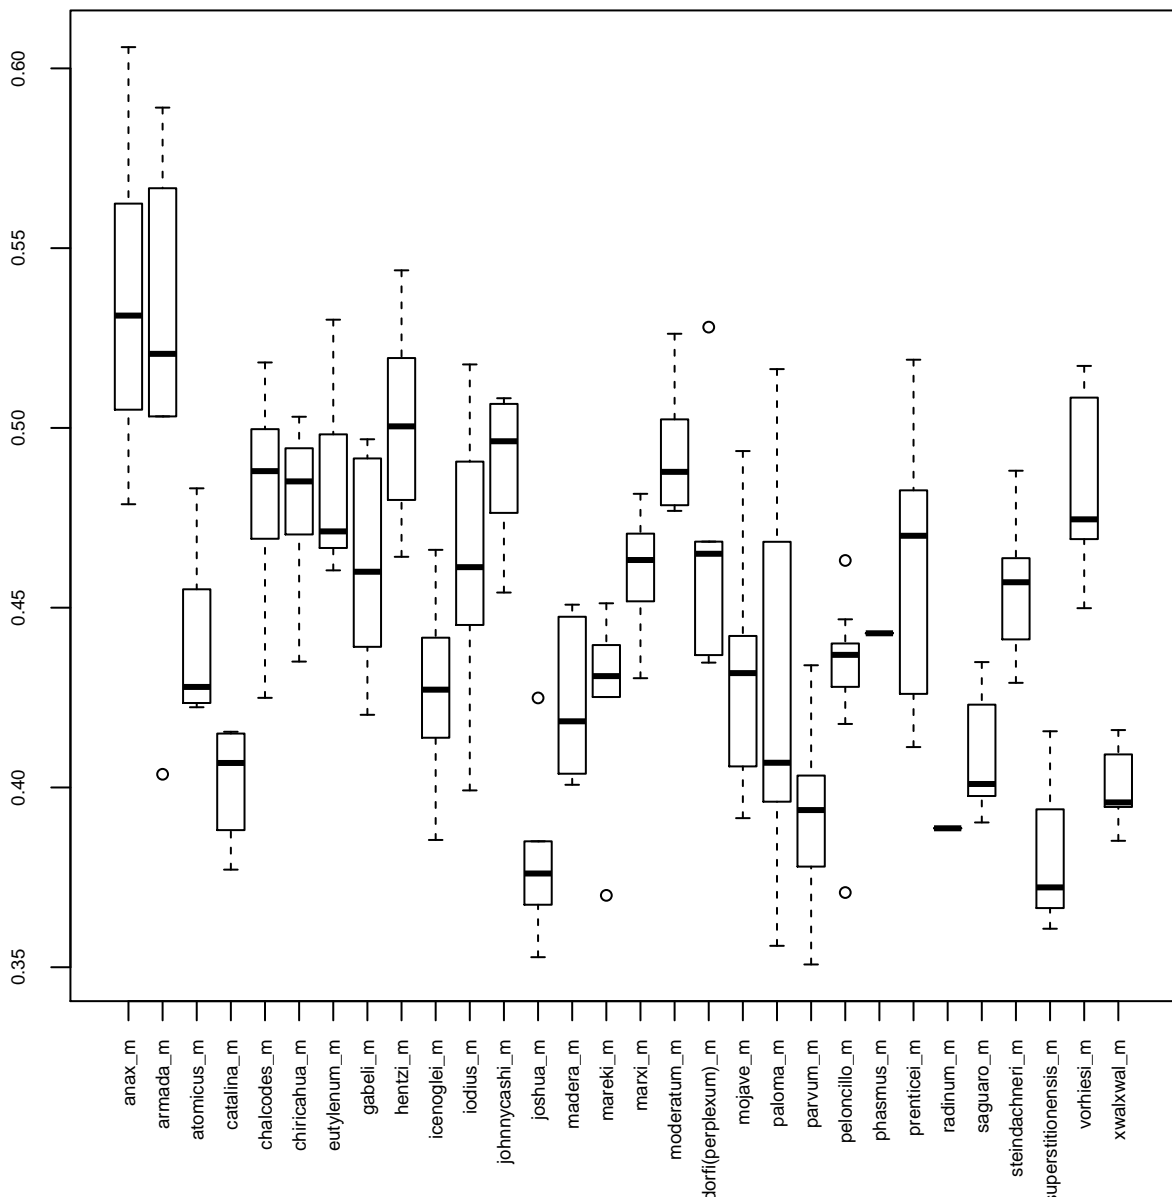

Supplement: Supplementary file 631

# Femur 4/Metatarsus 4 ratio – males

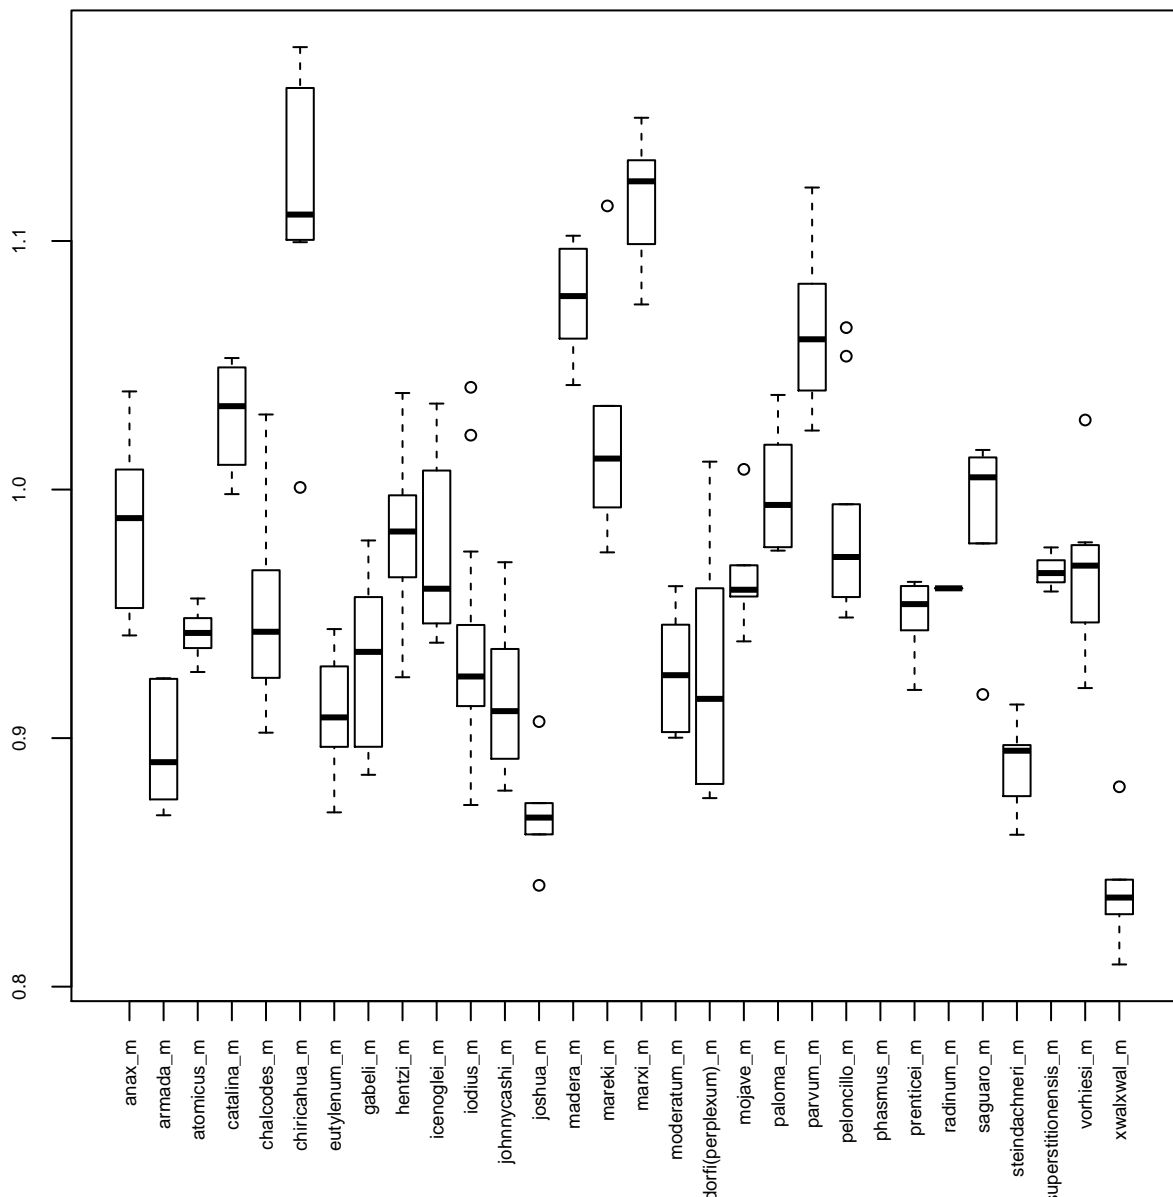

Supplement: Supplementary file 632

# Leg 4 Scopulation ratio – males

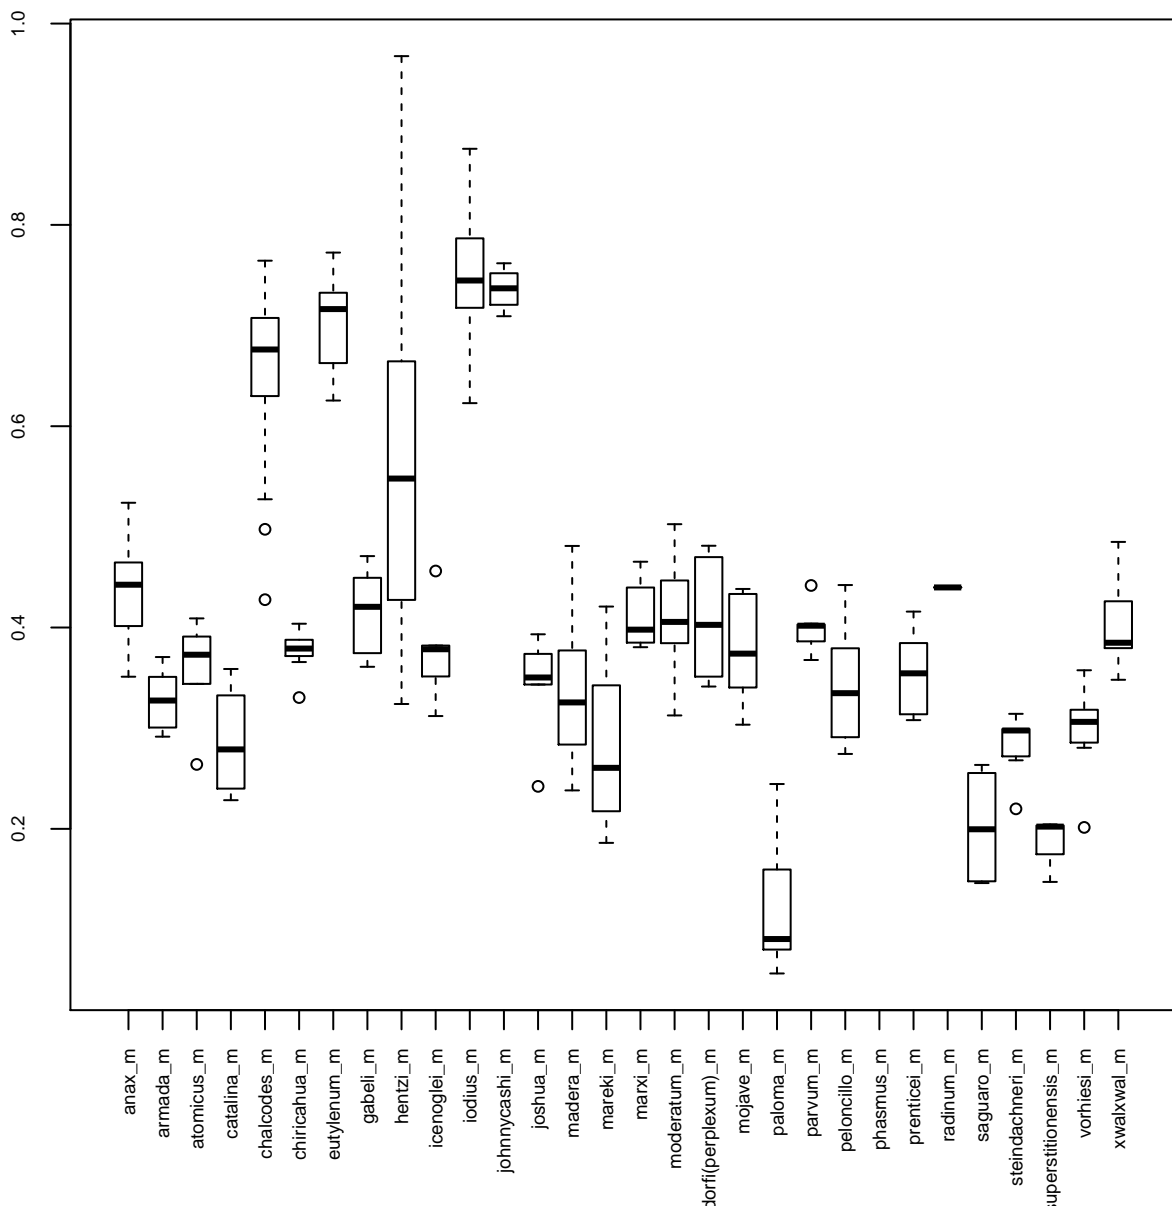

Supplement: Supplementary file 633

## Tibia 1/Metatarsus 4 Length ratio – females

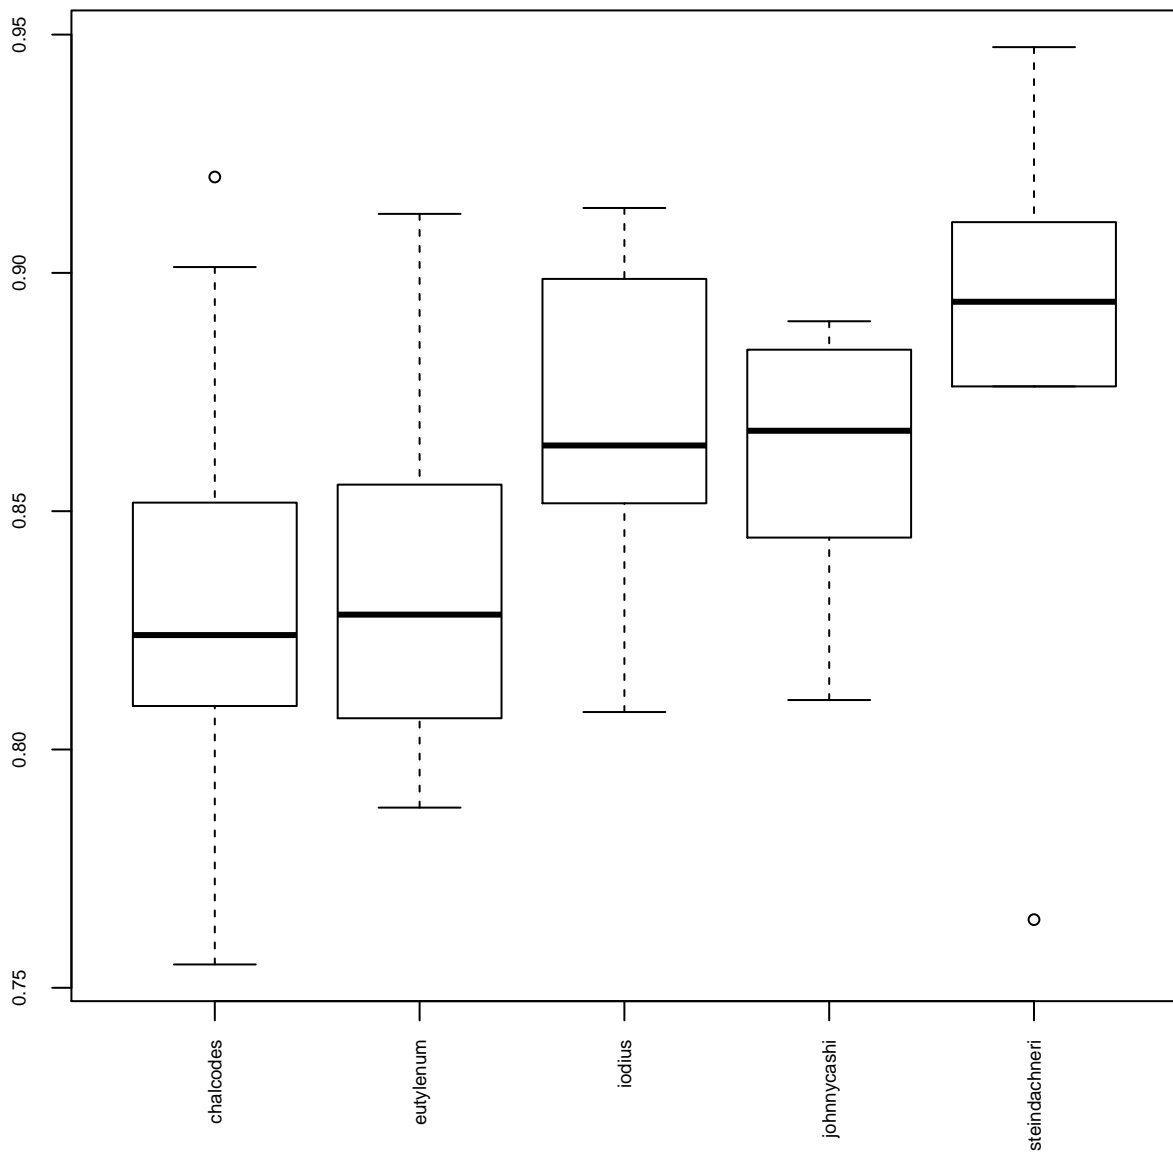

Supplement: Supplementary file 634

## Patella 3/Metatarsus 4 Length ratio – males

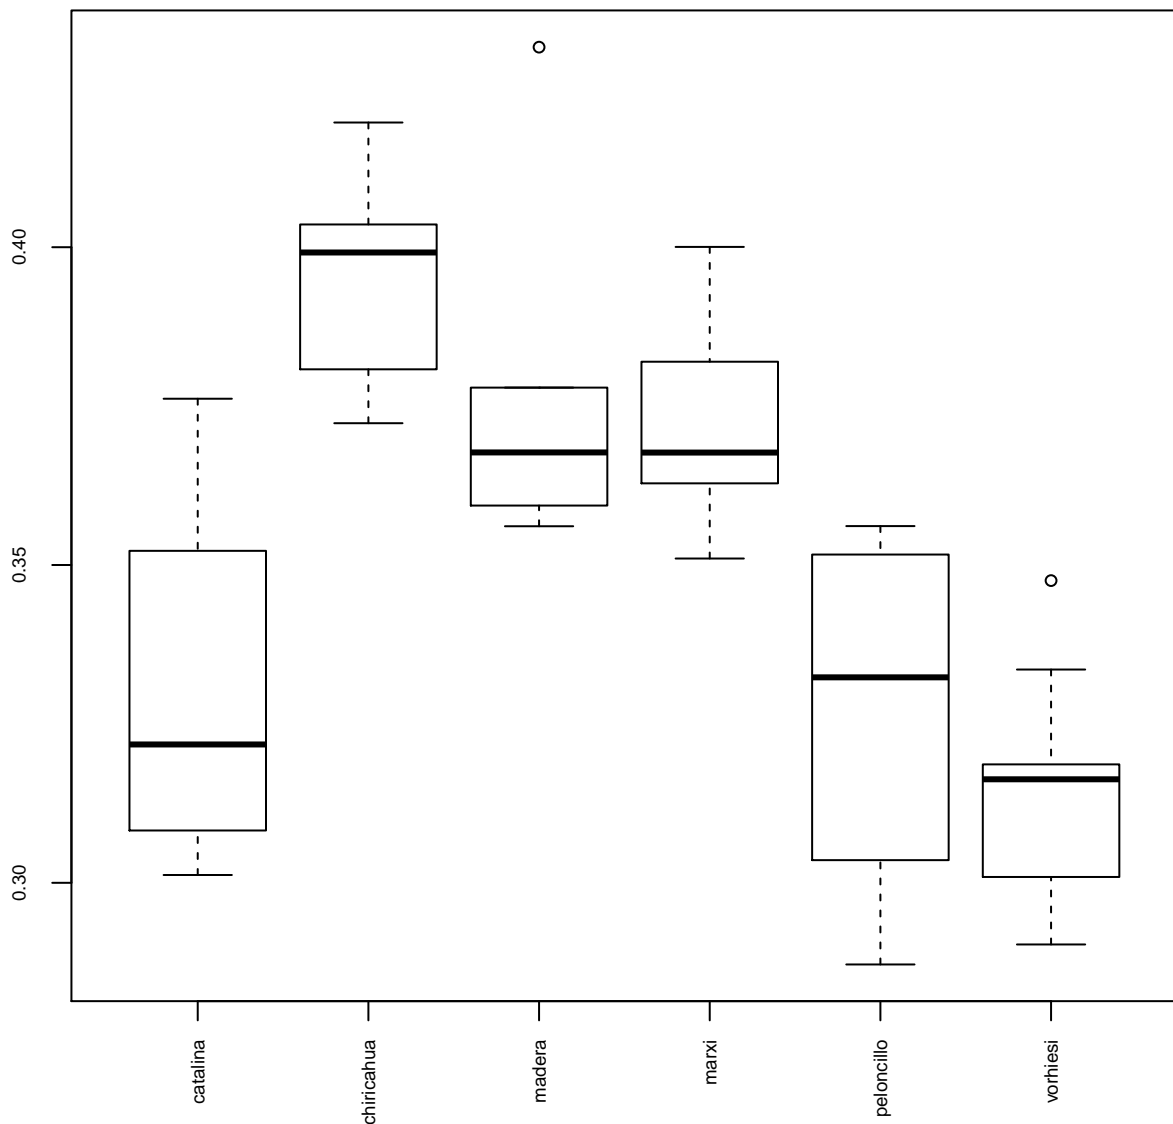

Supplement: Supplementary file 635

## Femur 3/Tarsus 4 Length ratio – females

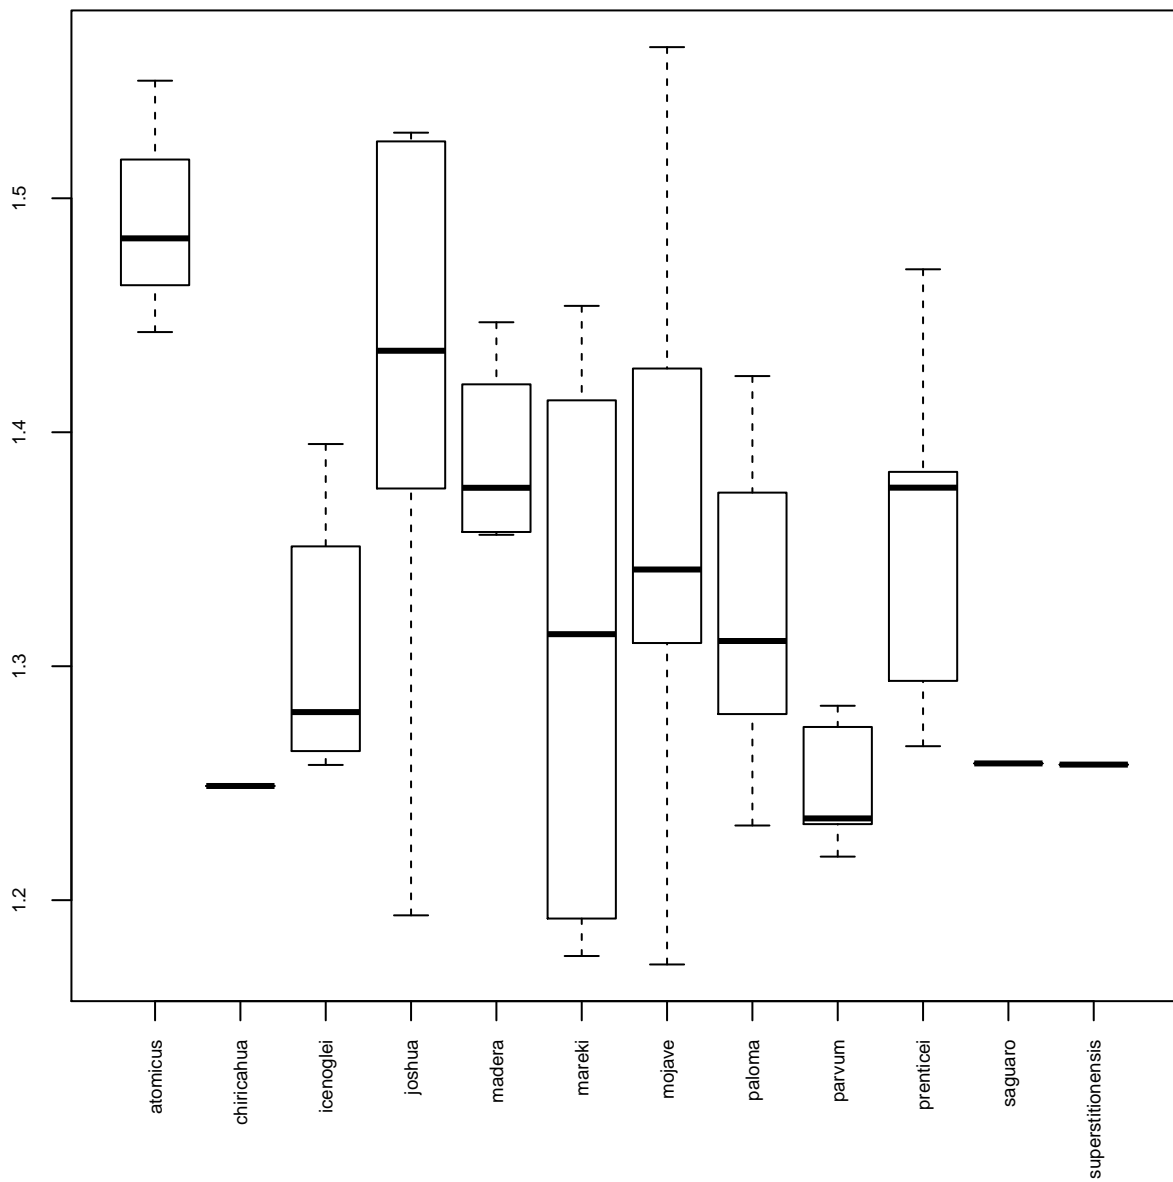

Supplement: Supplementary file 636

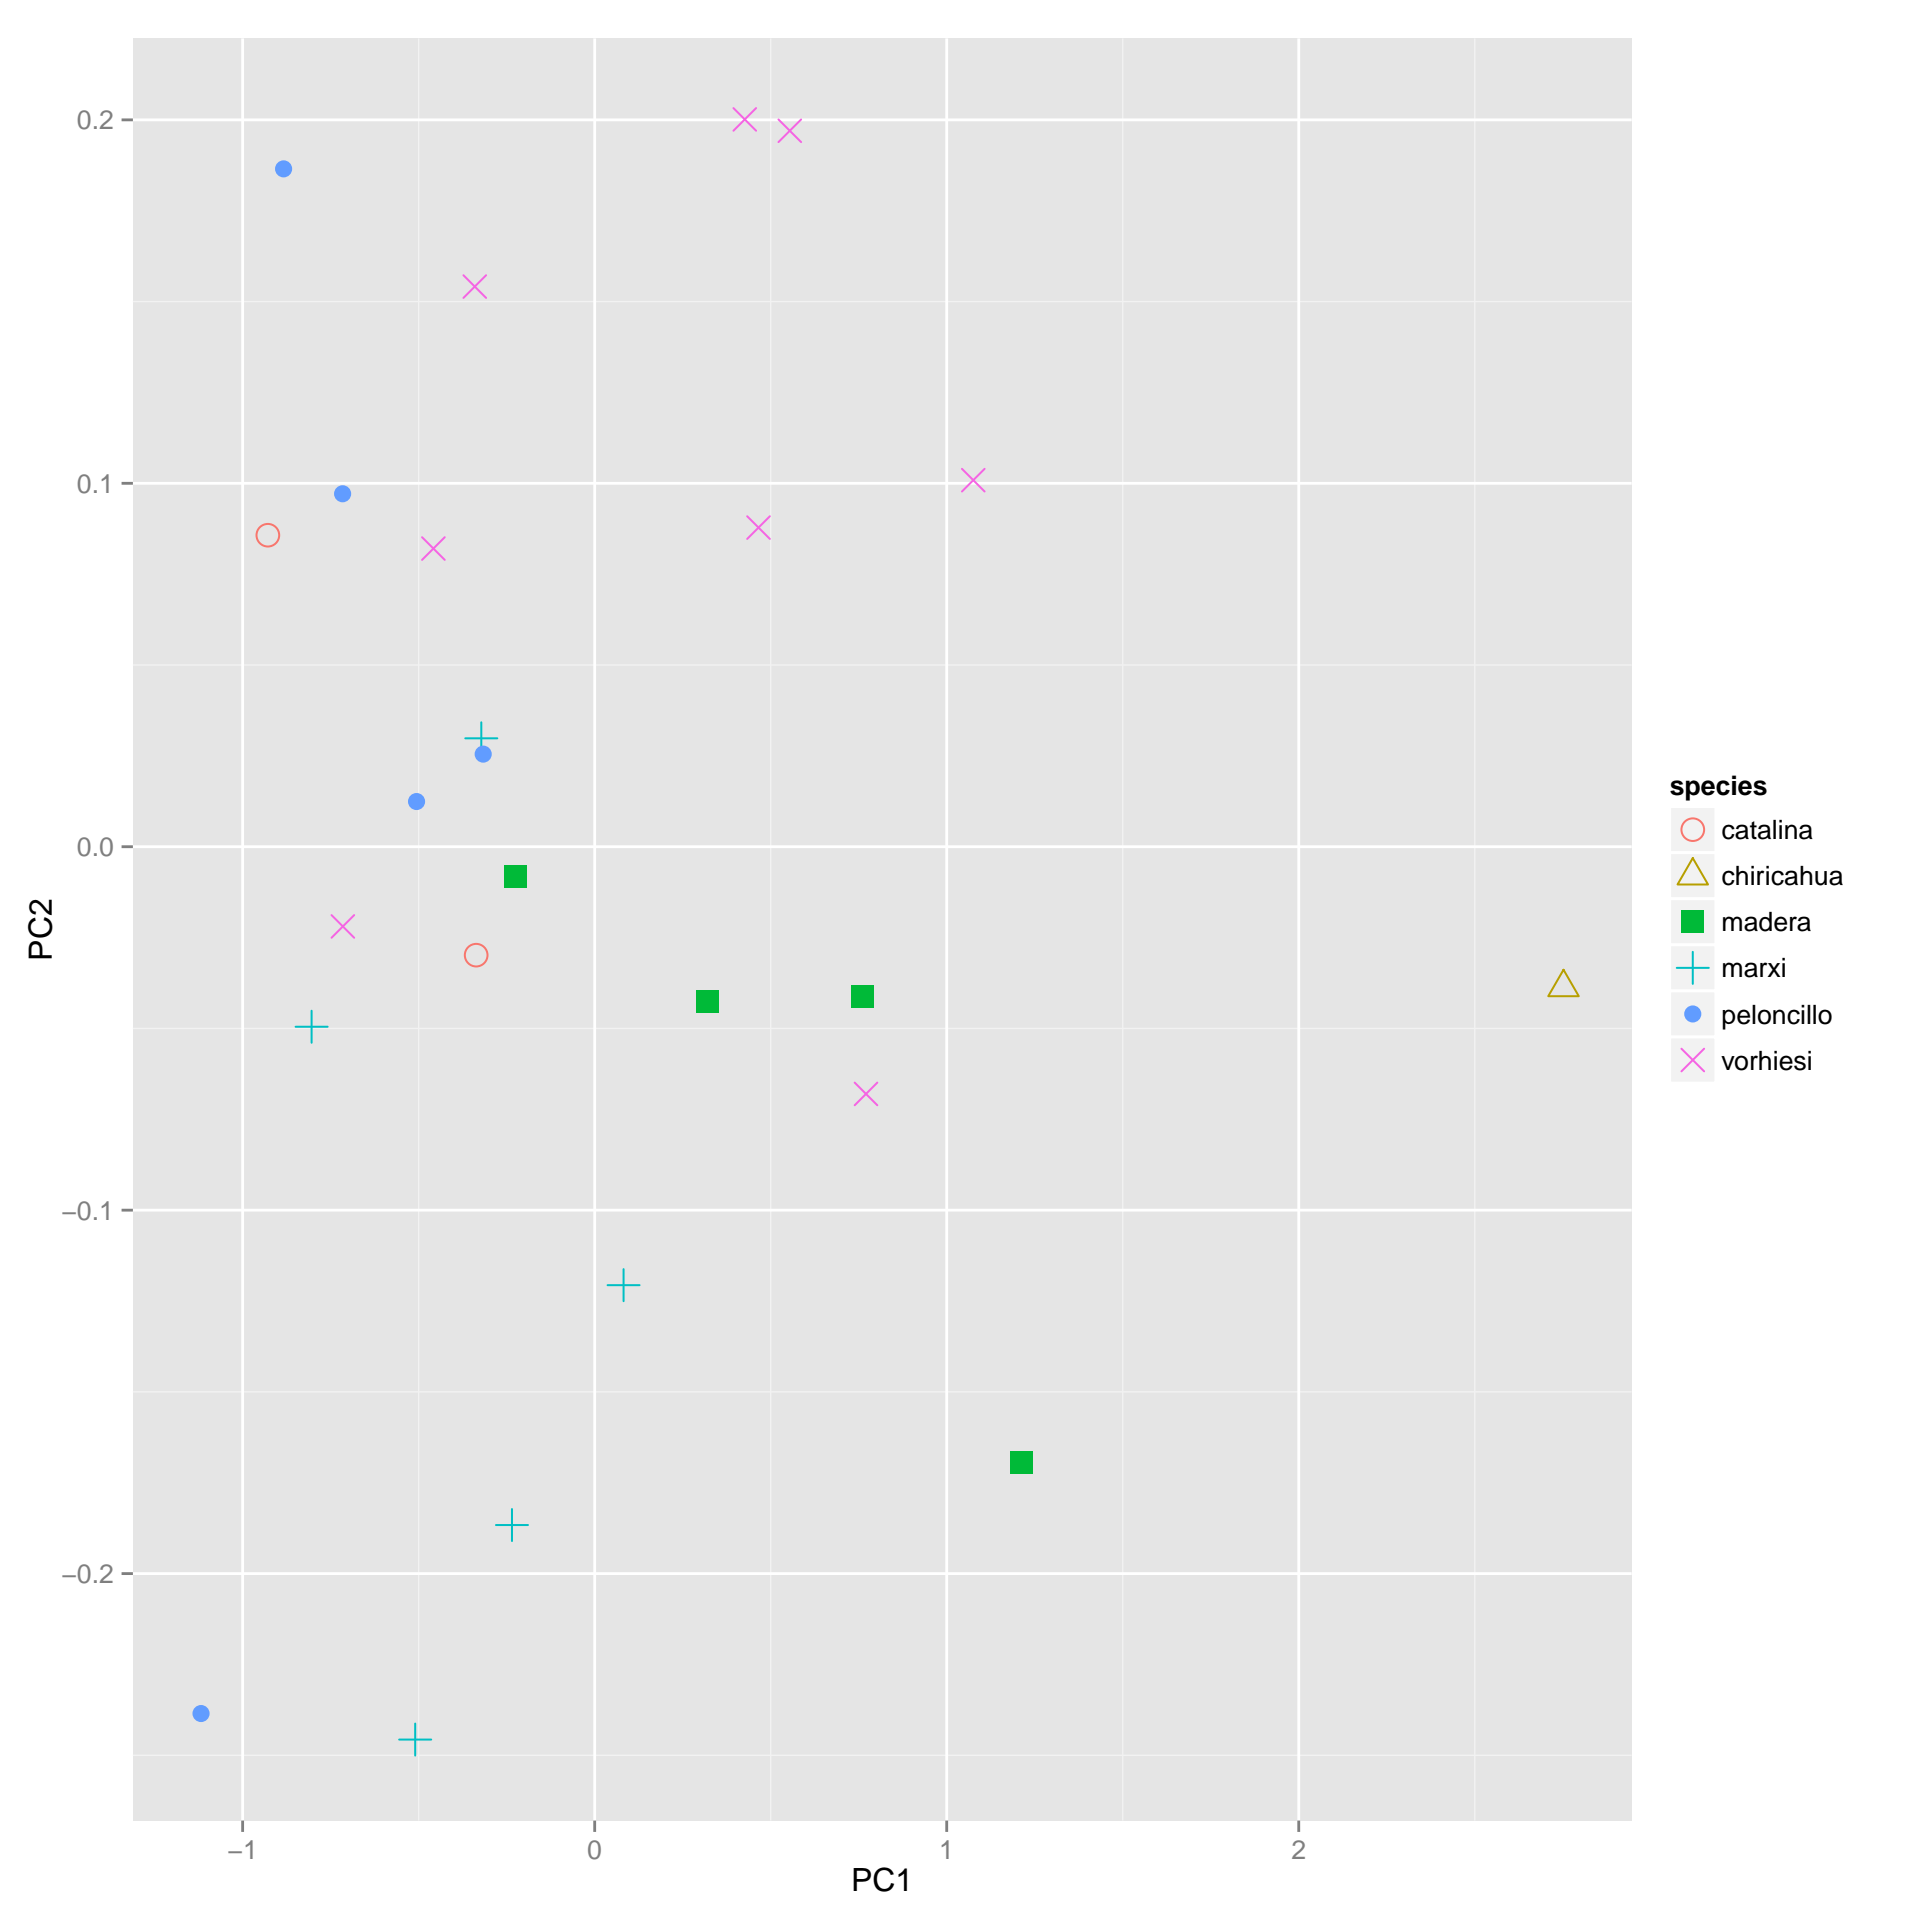

Supplement: Supplementary file 637

## Tibia 4/Tarsus 4 ratio – females

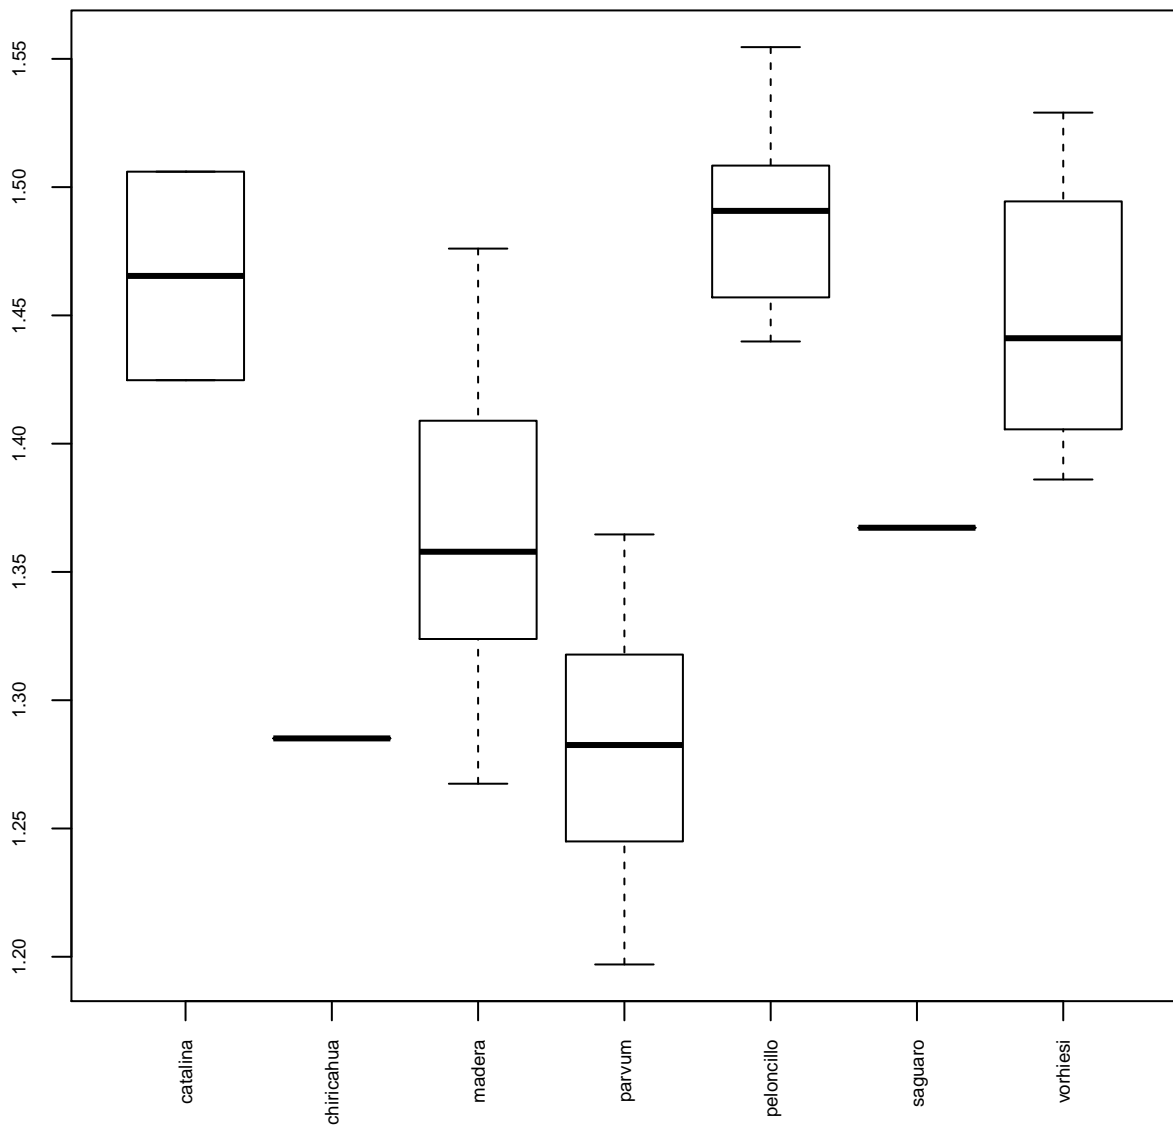

Supplement: Supplementary file 638

## Tarsus 1/Femur 4 Length ratio – females

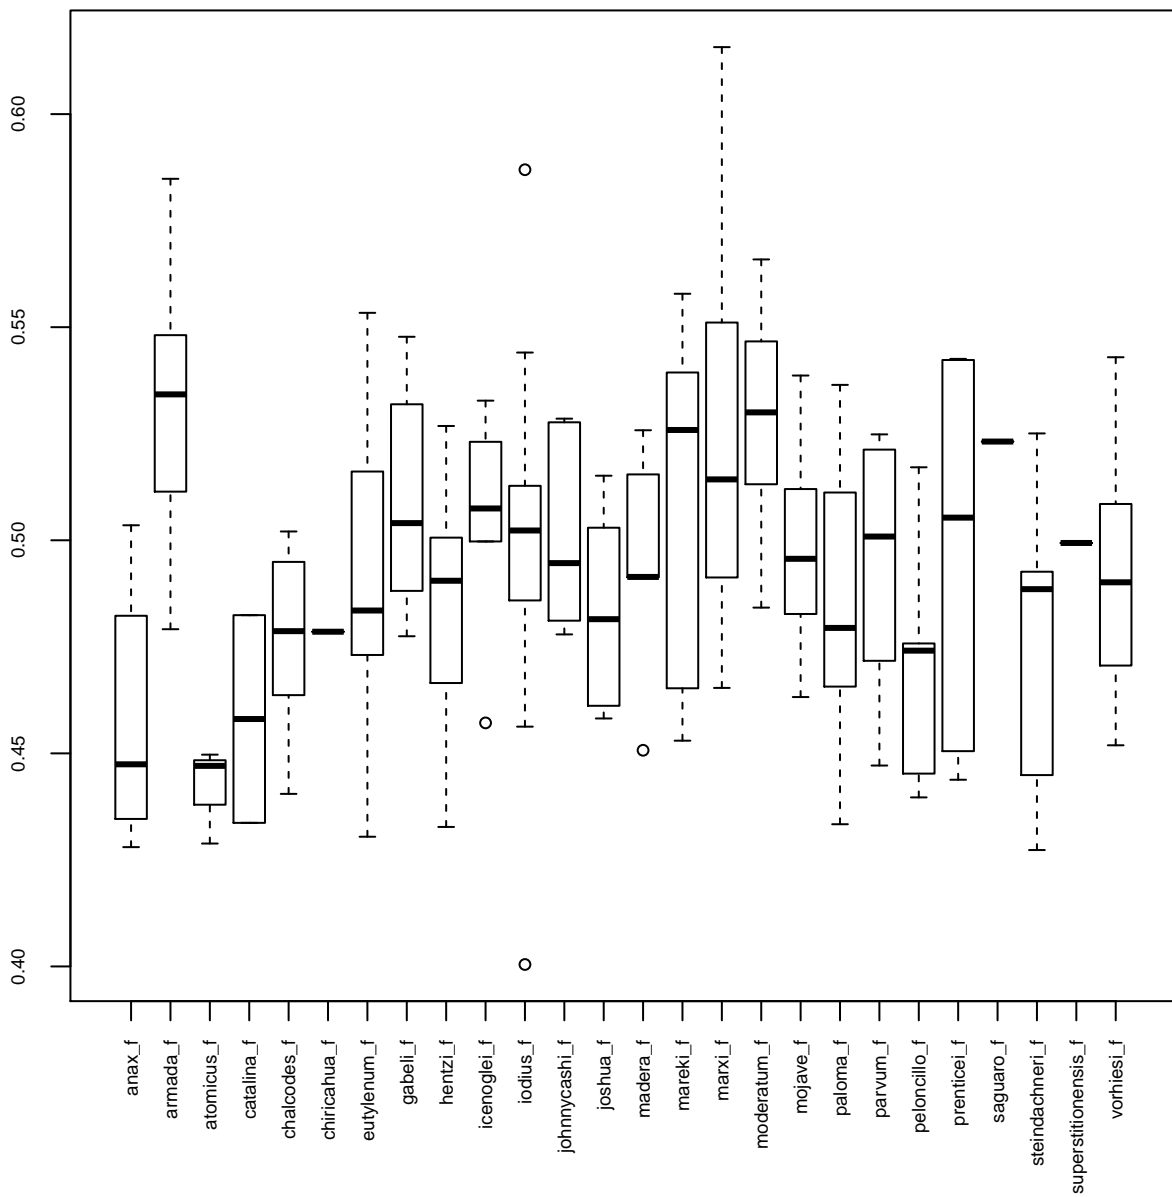

Supplement: Supplementary file 639

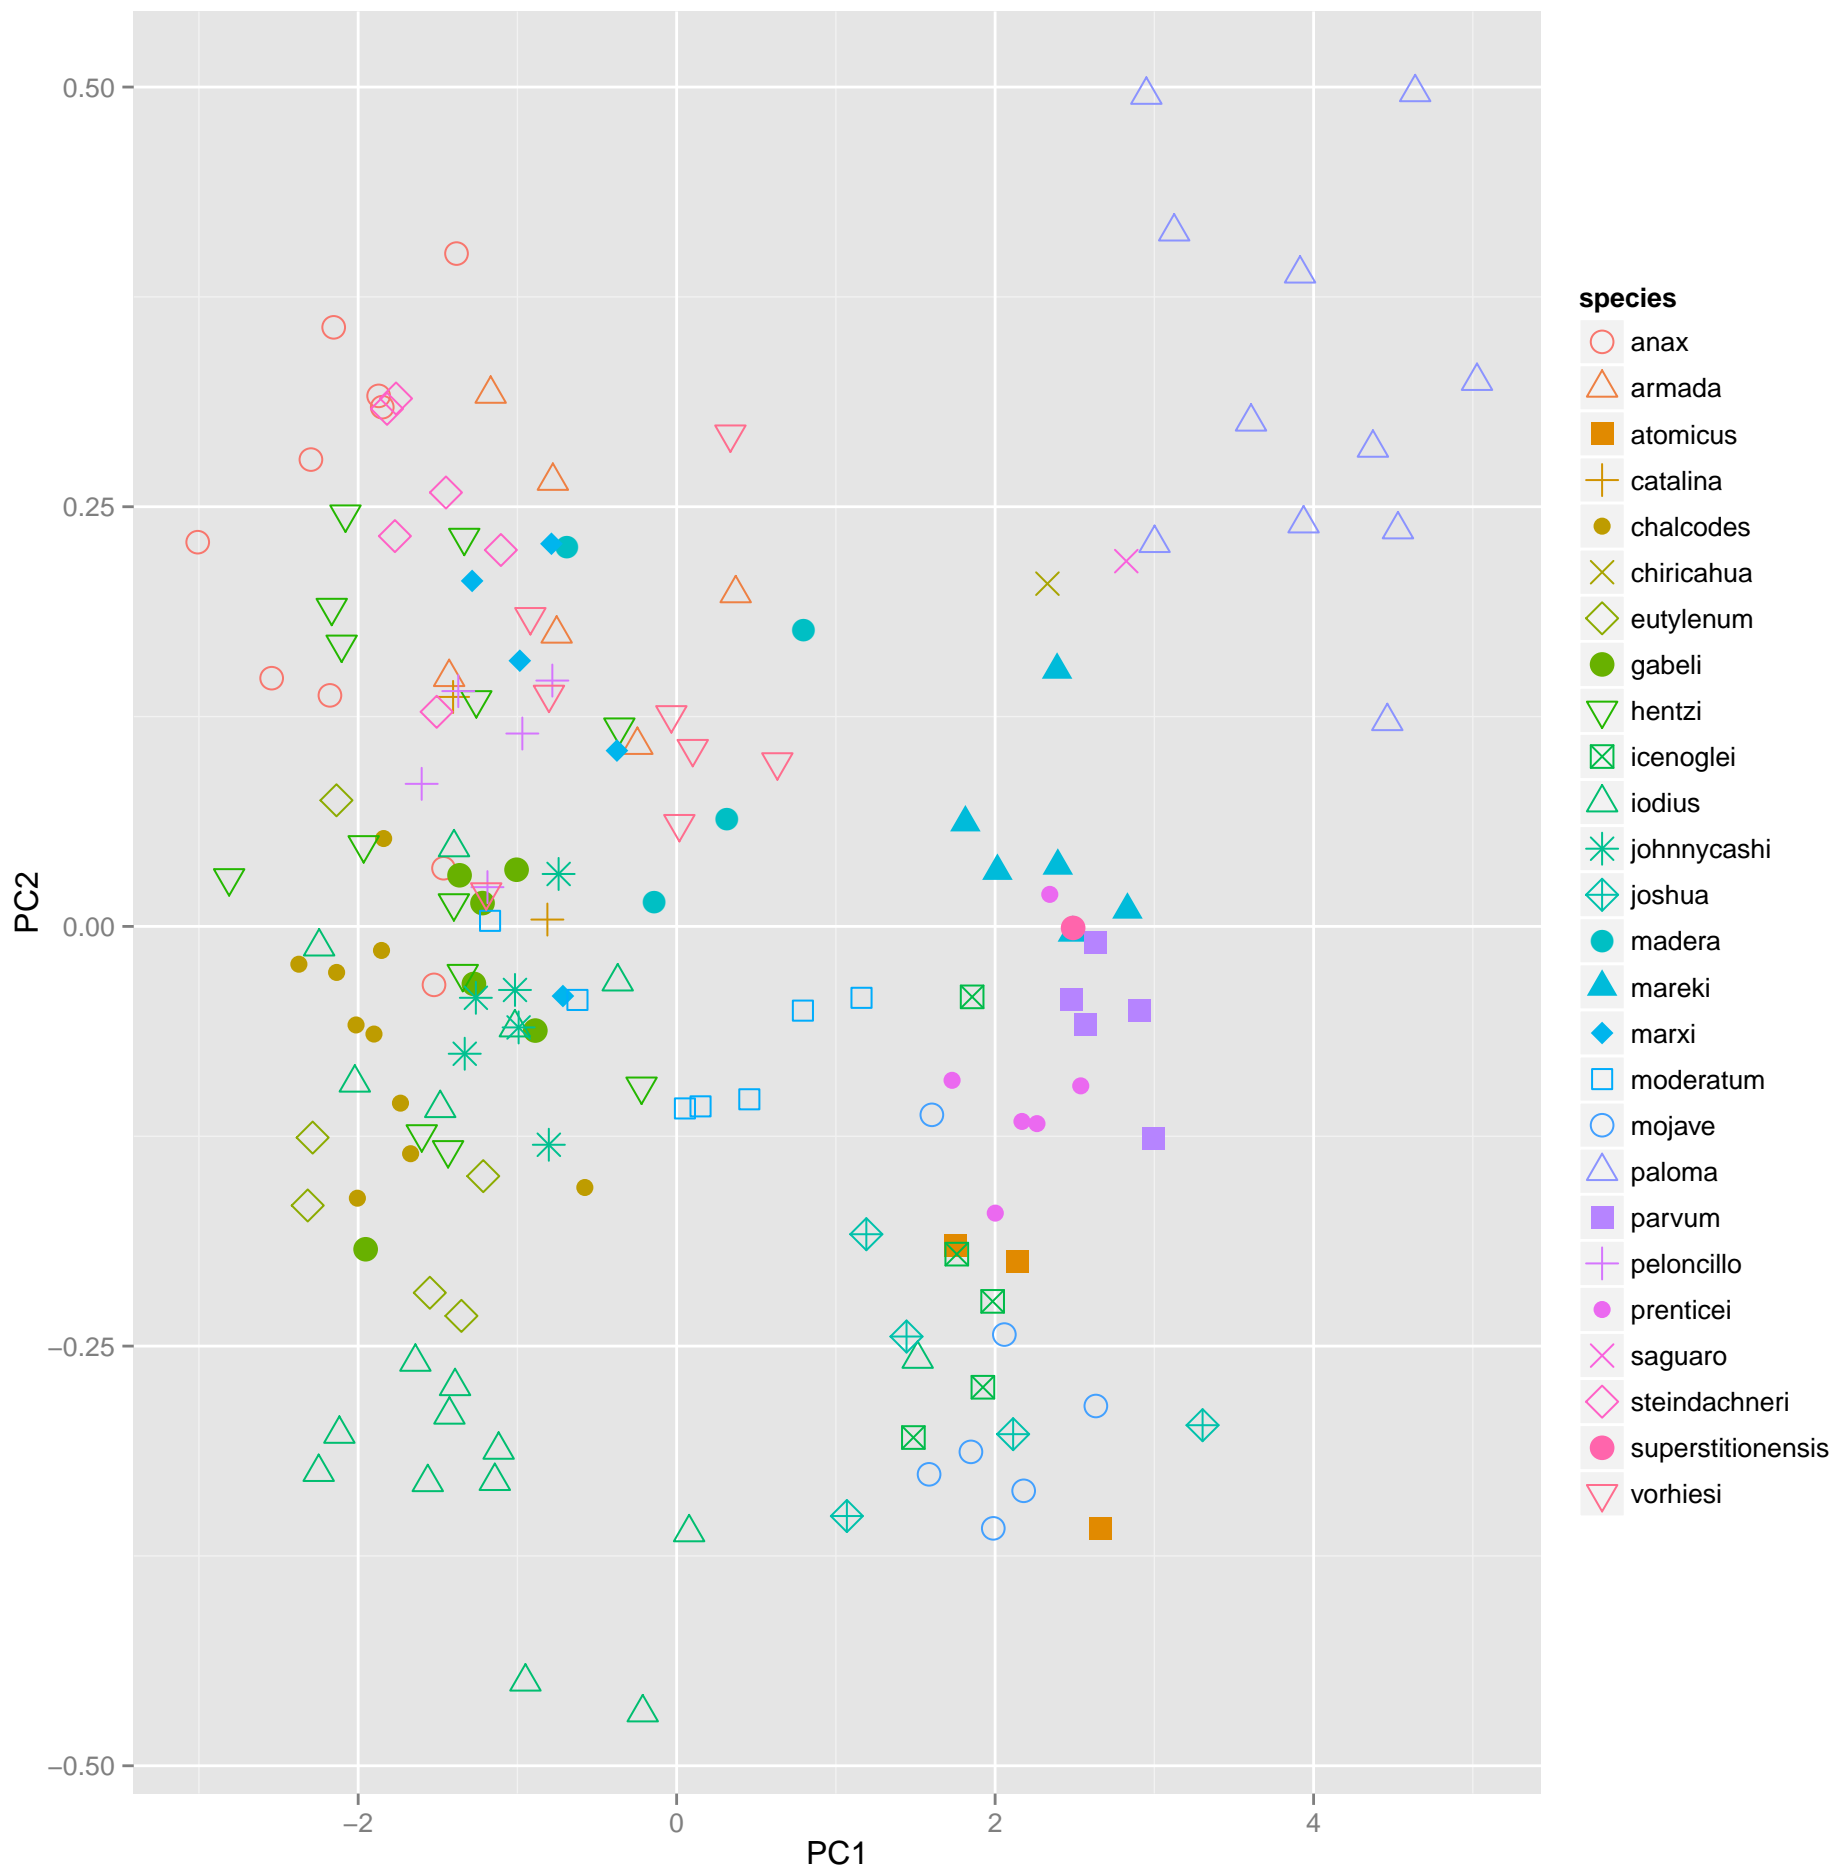

Supplement: Supplementary file 640

## Metatarsus 3/Tibia 4 Length ratio – males

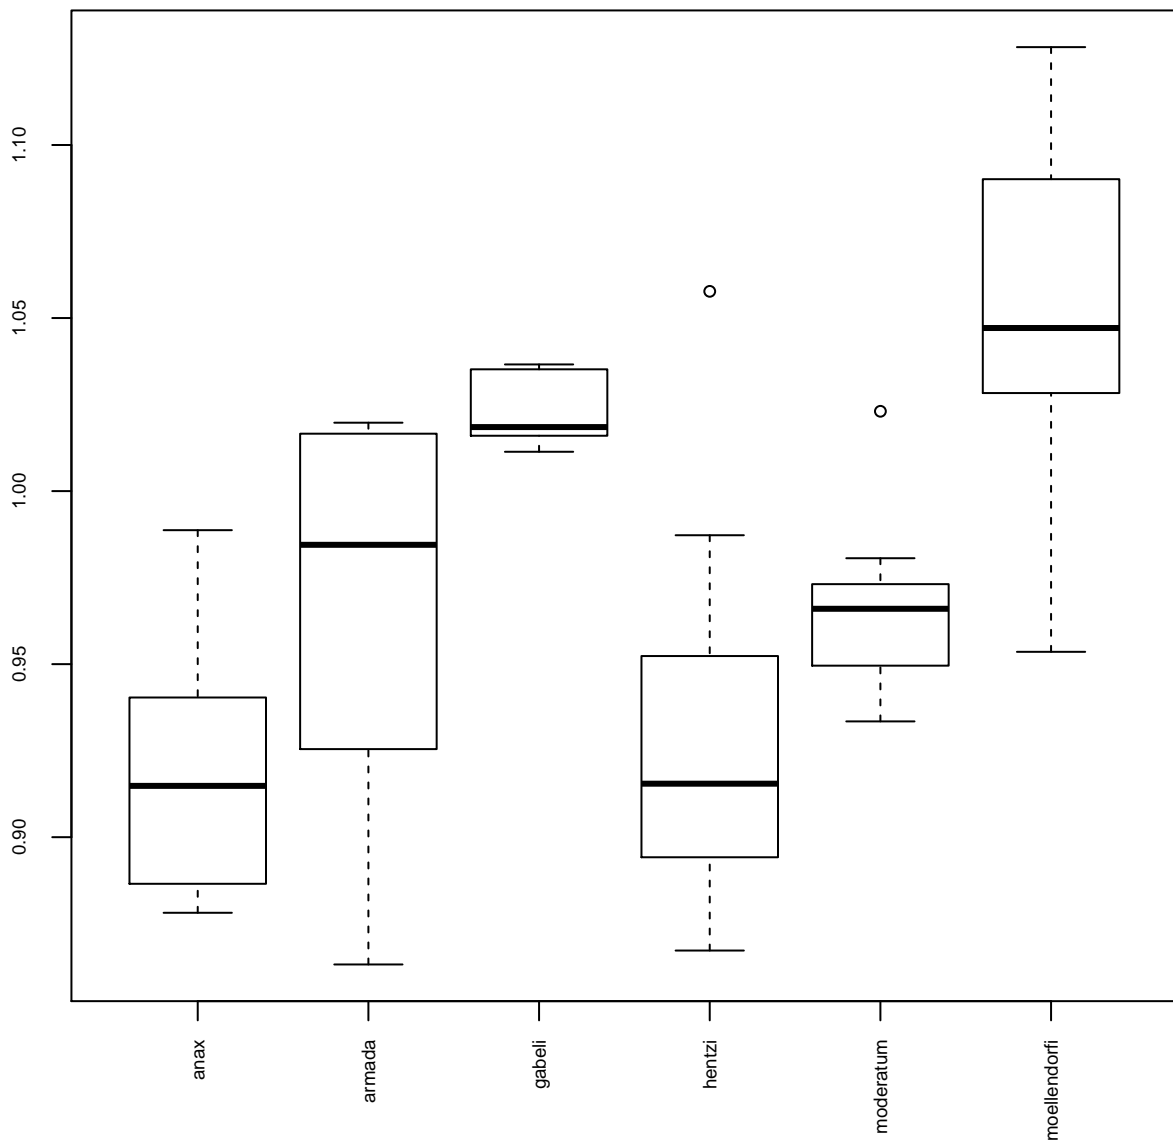

Supplement: Supplementary file 641

## Patella 3/Patella 4 ratio – males

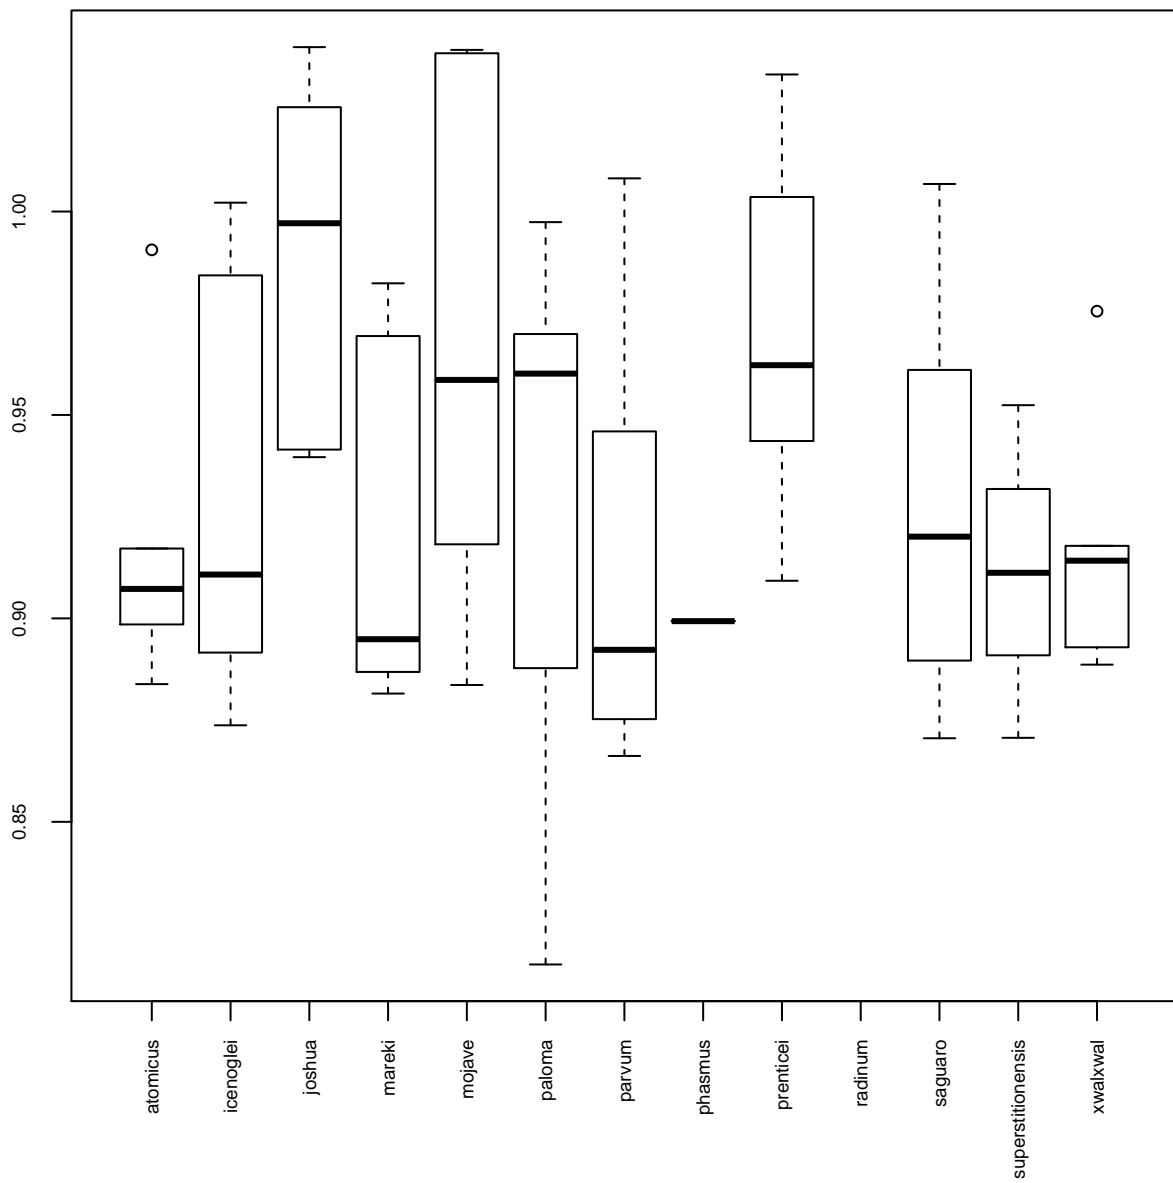

Supplement: Supplementary file 642

# Patella 1/Tibia 3 Length ratio – females

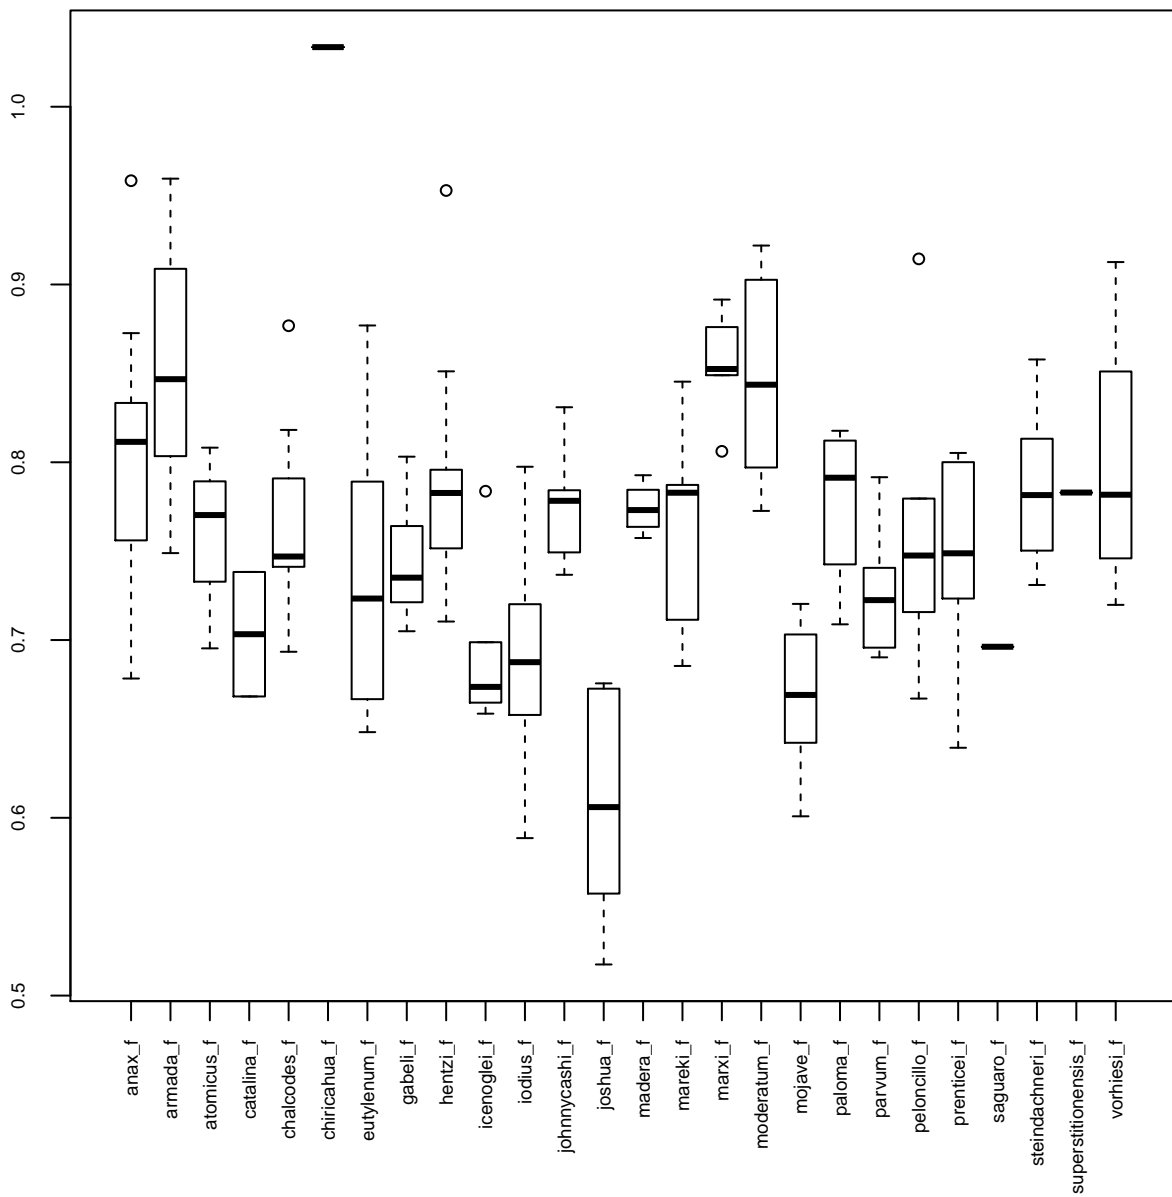

Supplement: Supplementary file 643

# Femur 1/Tibia 4 ratio – females

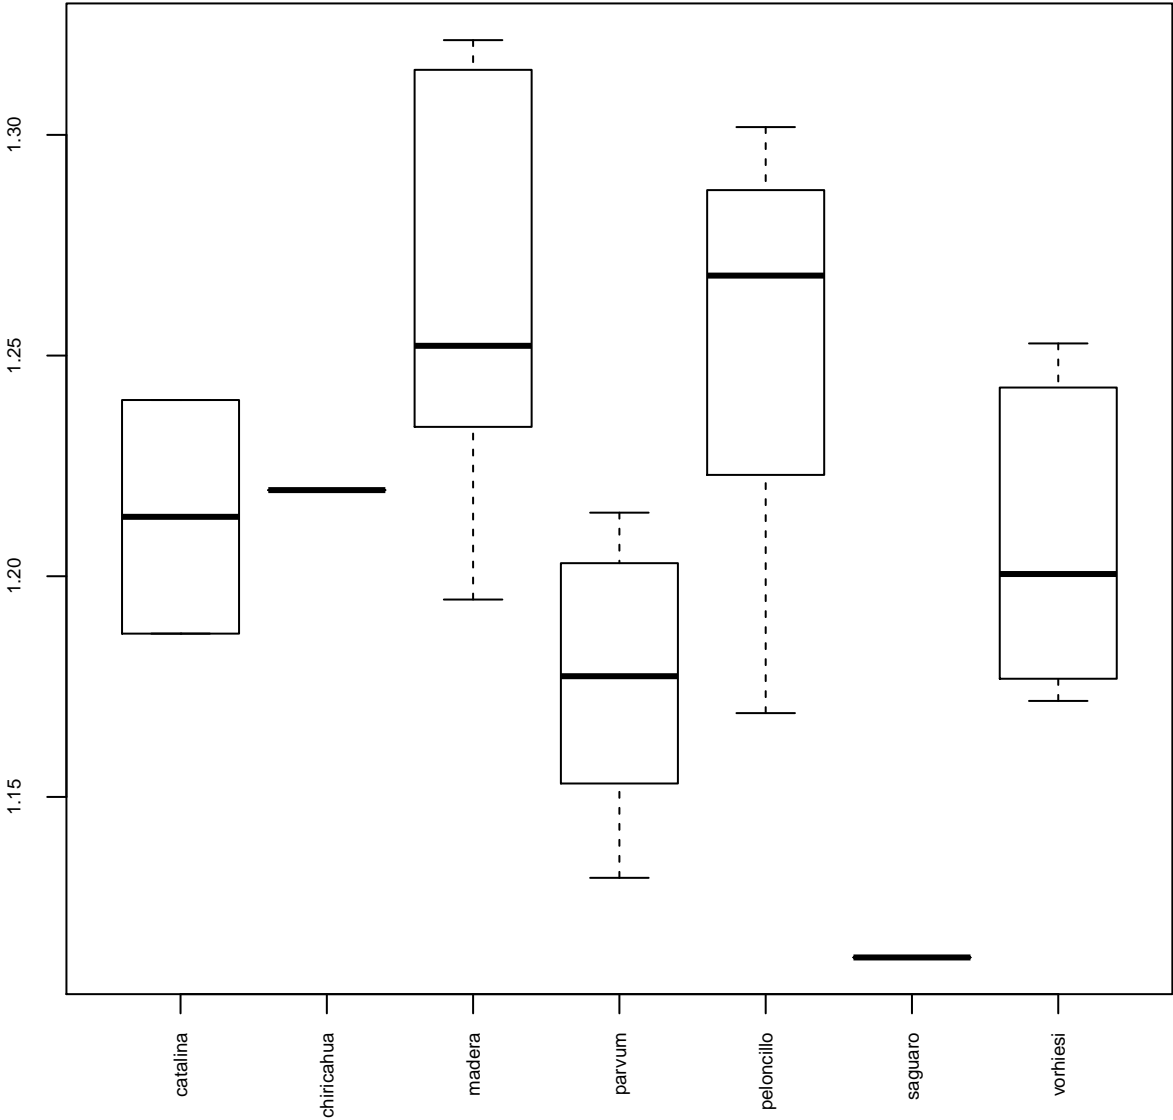

Supplement: Supplementary file 644

## Patella 4/Tibia 4 ratio – females

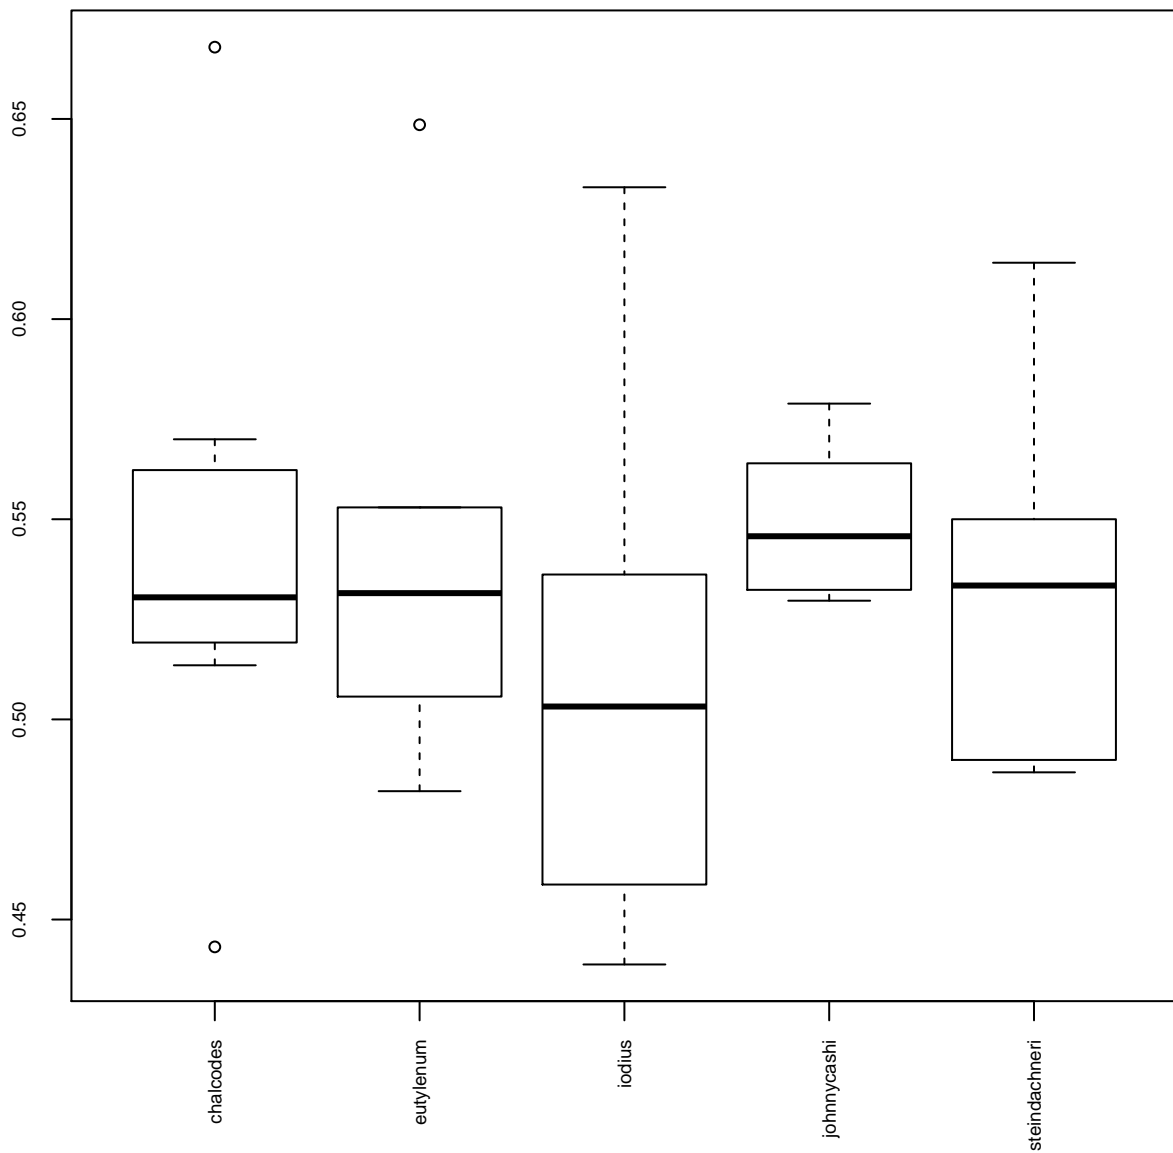

Supplement: Supplementary file 645

## Carapace Length/Width ratio – females

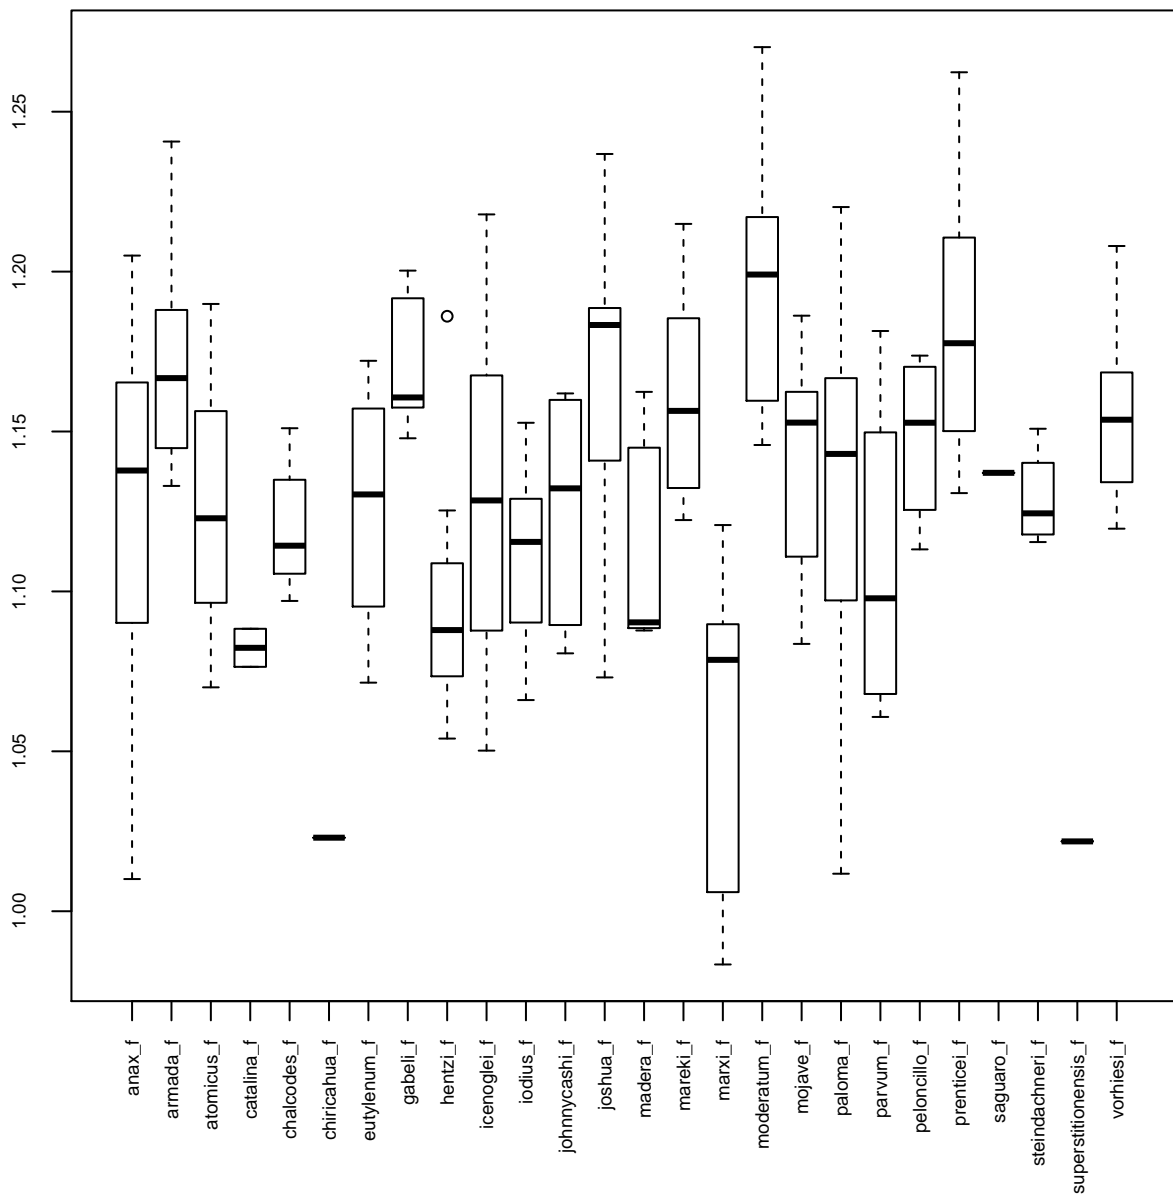

Supplement: Supplementary file 646

## Tibia 1/Tarsus 3 Length ratio – males

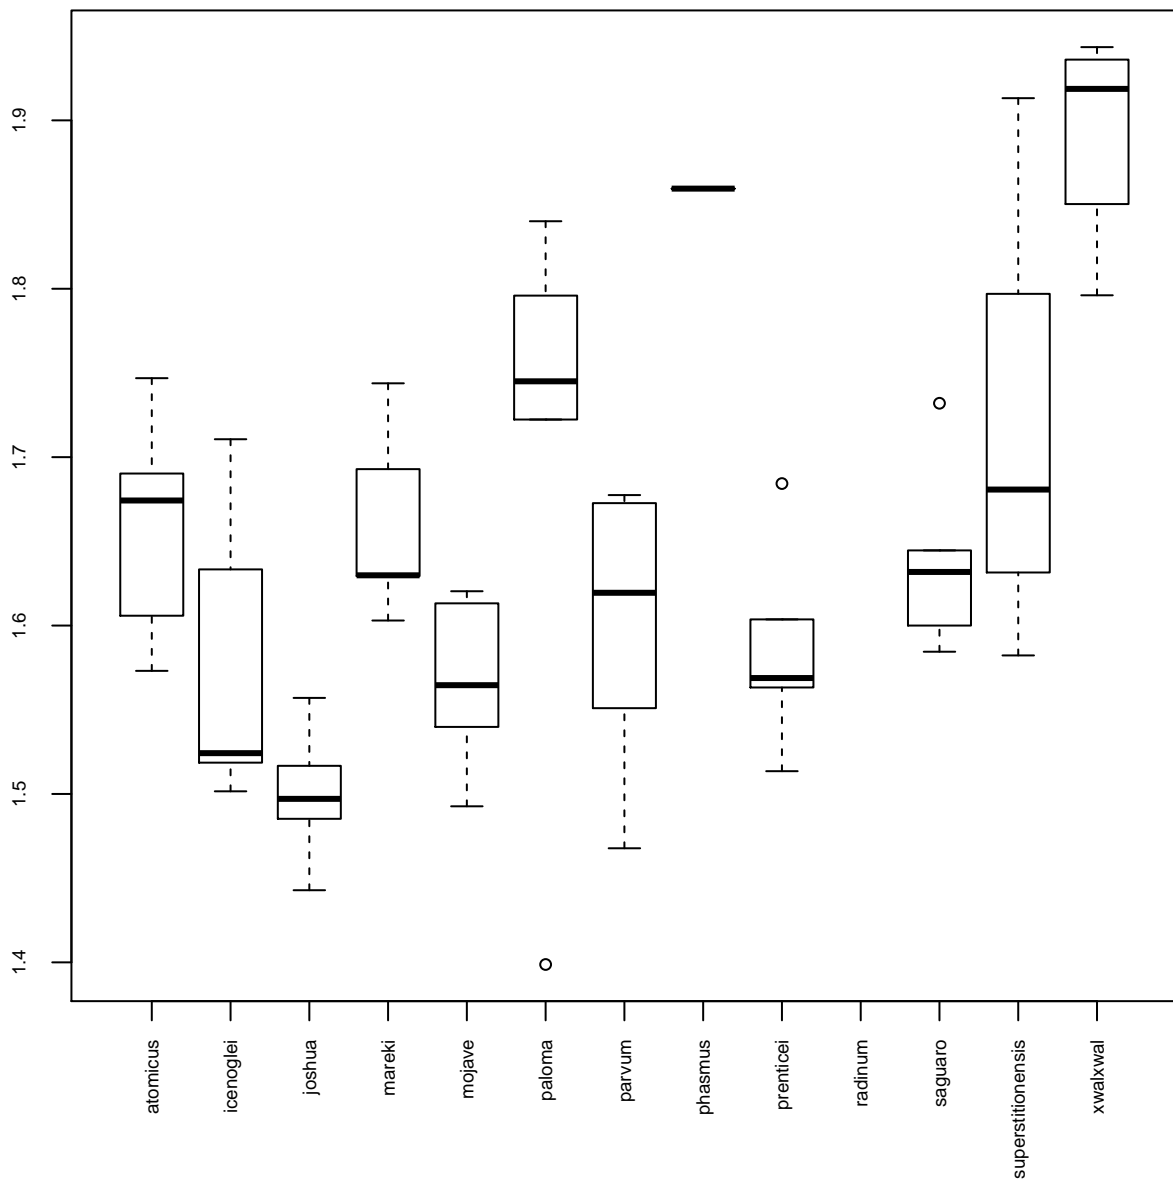

Supplement: Supplementary file 647

# Leg 3 Scopulation ratio – males

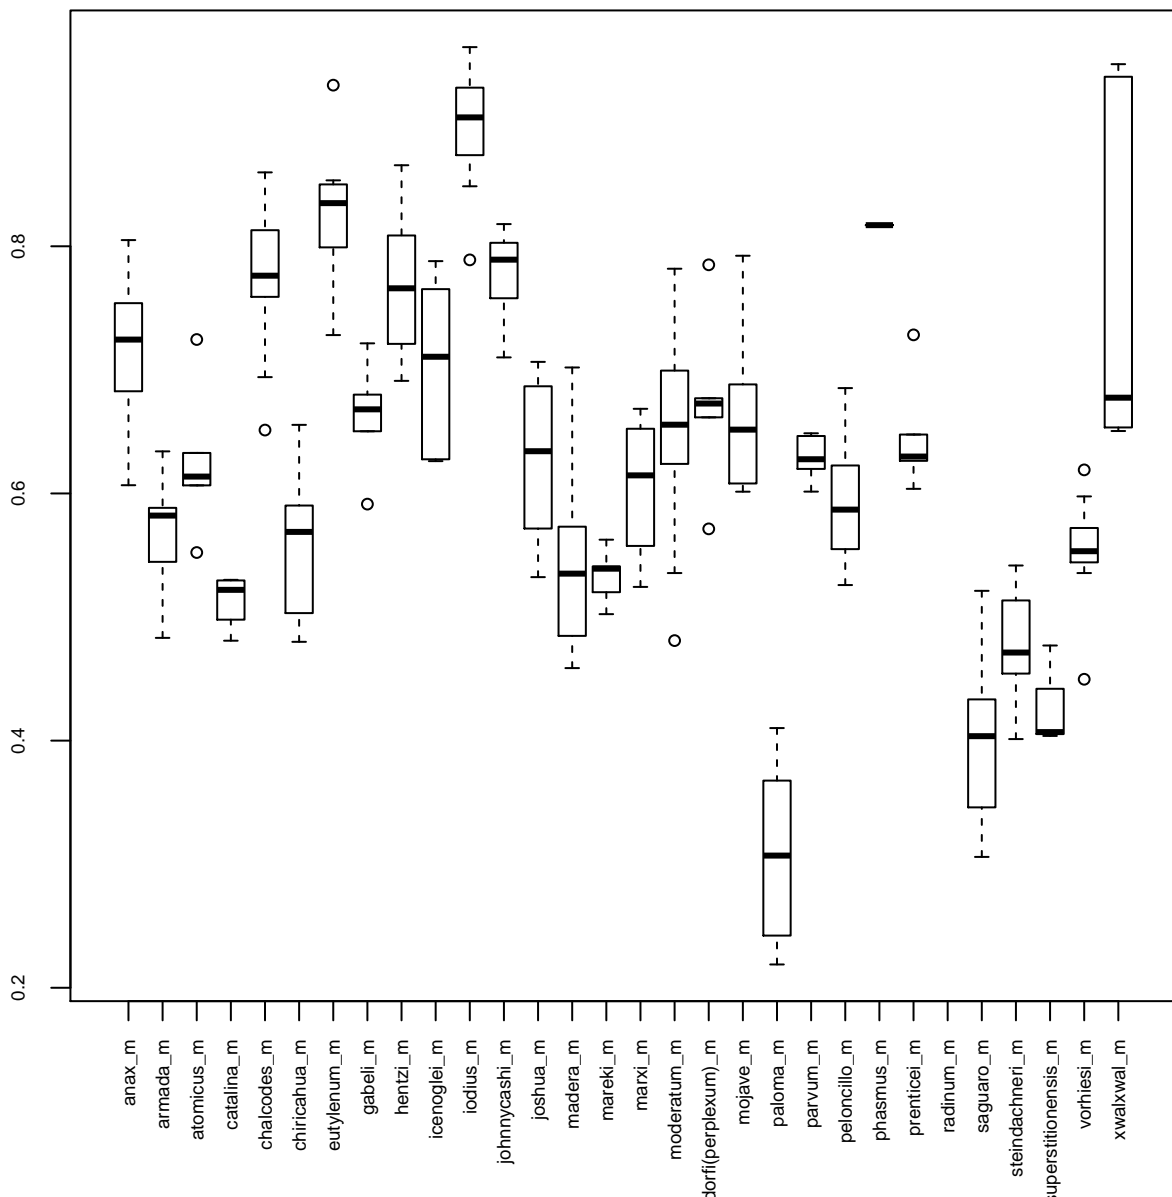

Supplement: Supplementary file 648

## Palpal Tibia/Tarsus 3 Length ratio – males

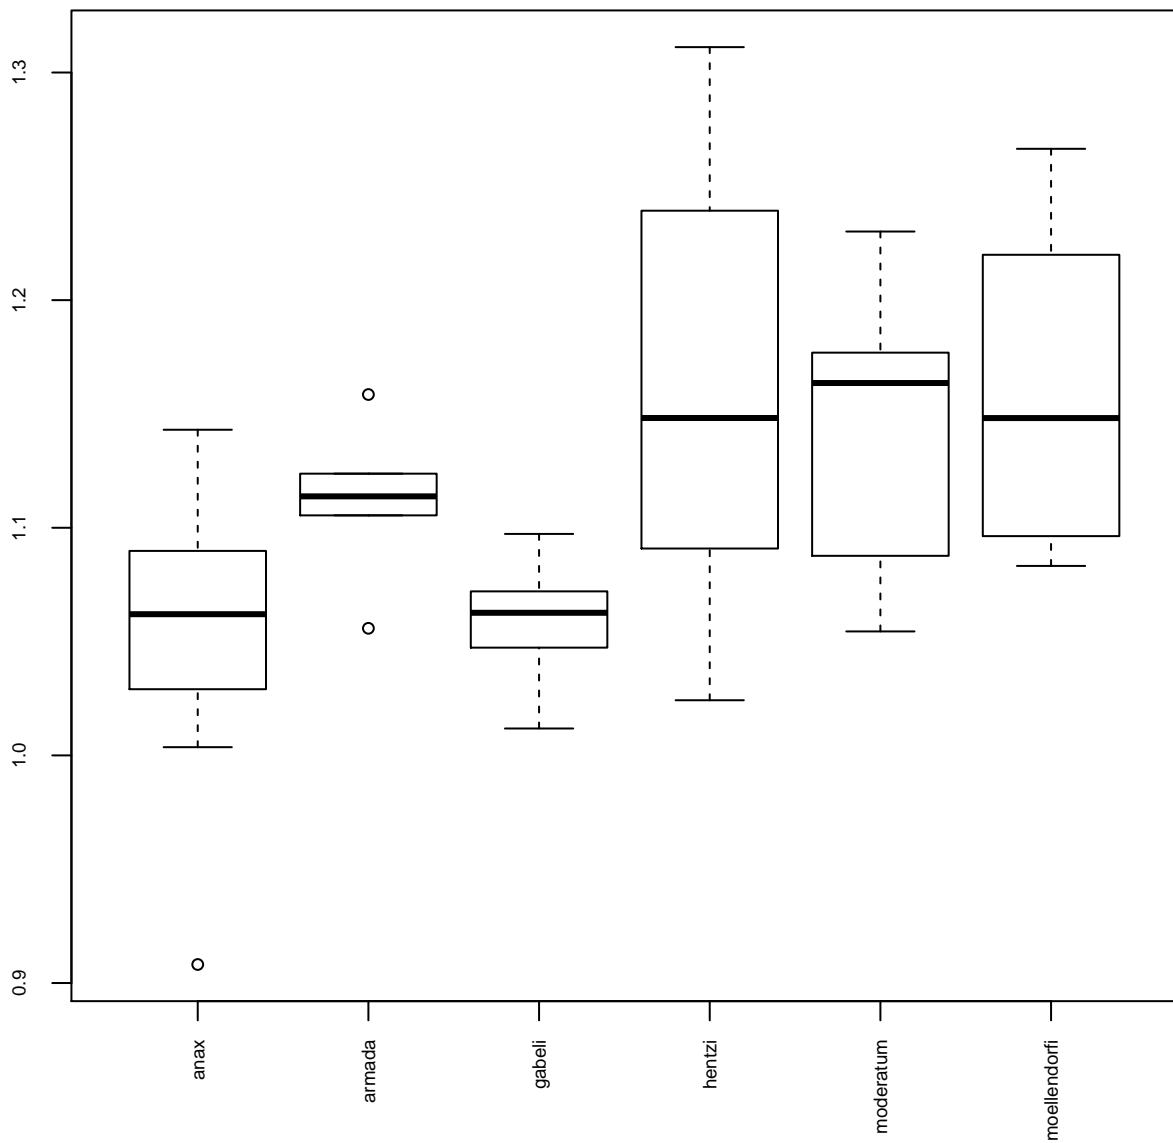

Supplement: Supplementary file 649

## Carapace Length/Femur 4 ratio – males

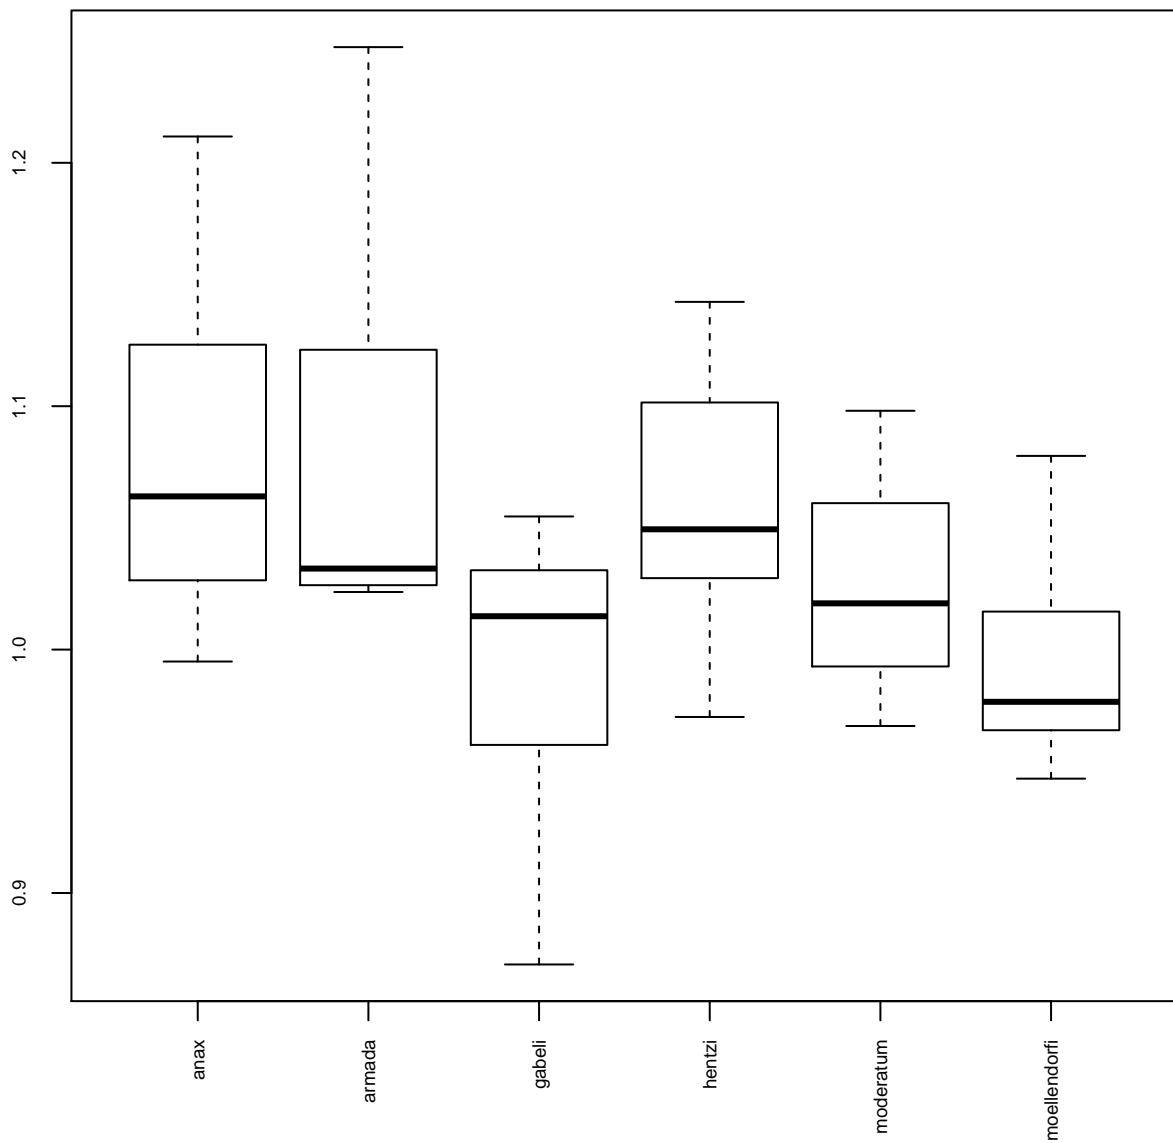

Supplement: Supplementary file 650

## Metatarsus 1/Metatarsus 3 ratio – males

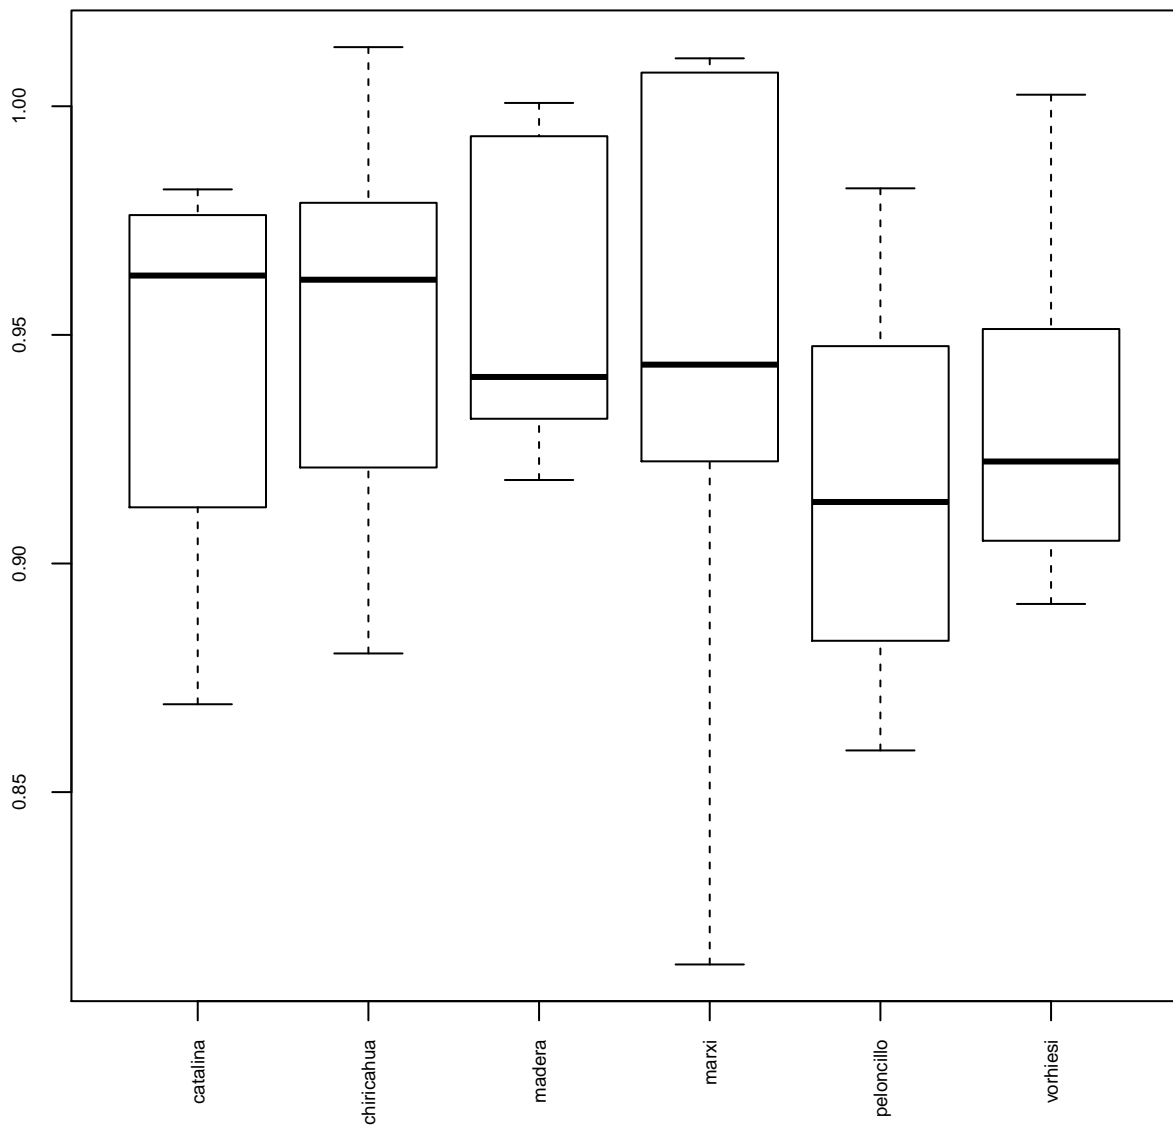

Supplement: Supplementary file 651

# Metatarsus 4/Tarsus 4 ratio – males

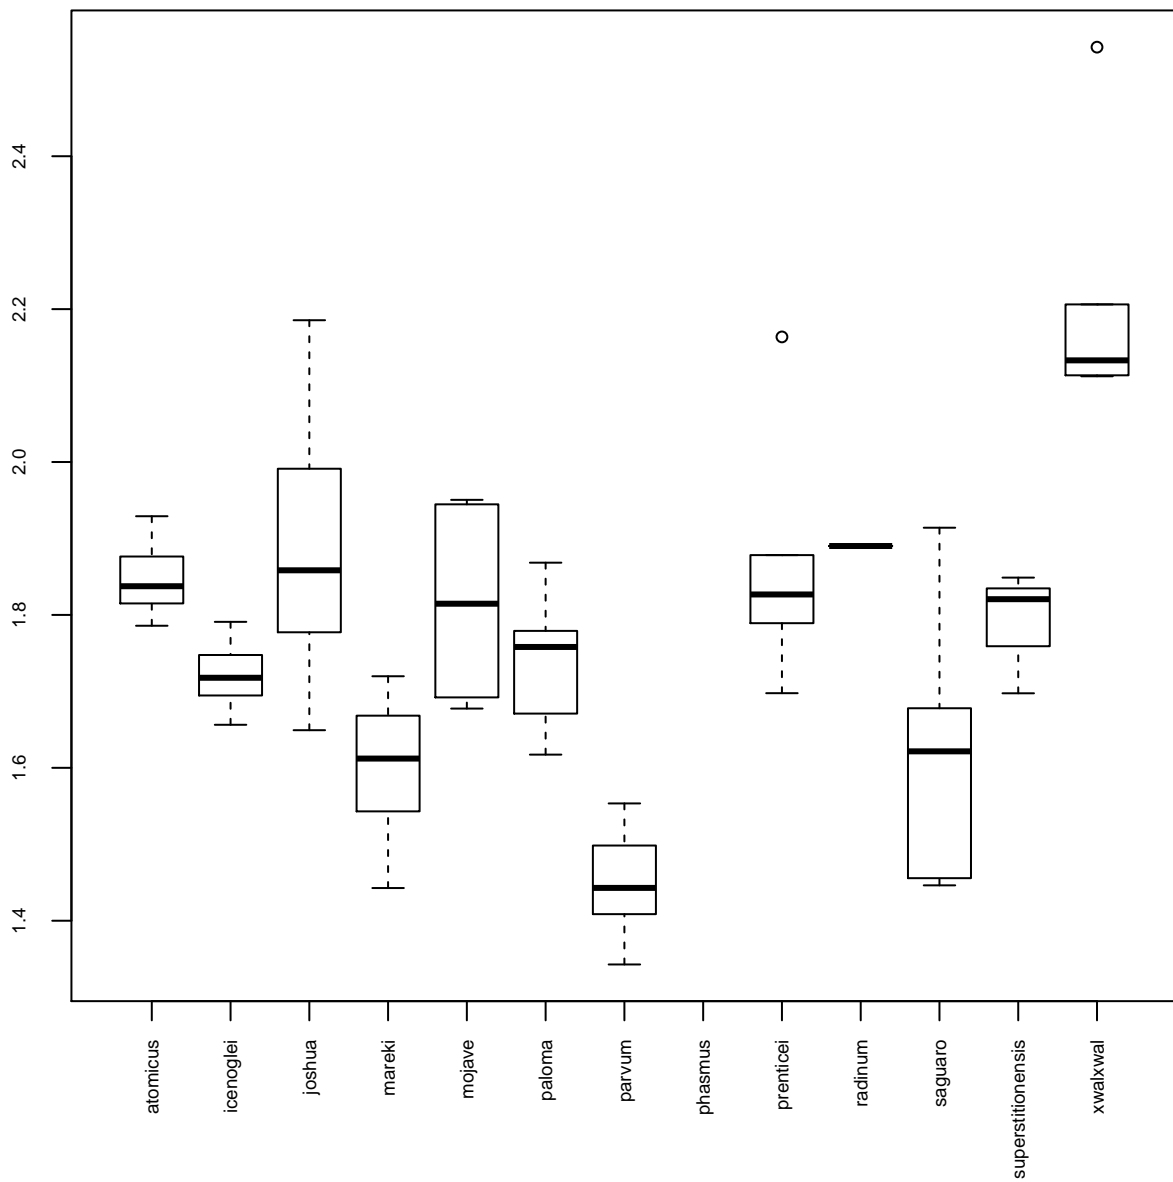

Supplement: Supplementary file 652

## Patella 3/Tarsus 4 Length ratio – males

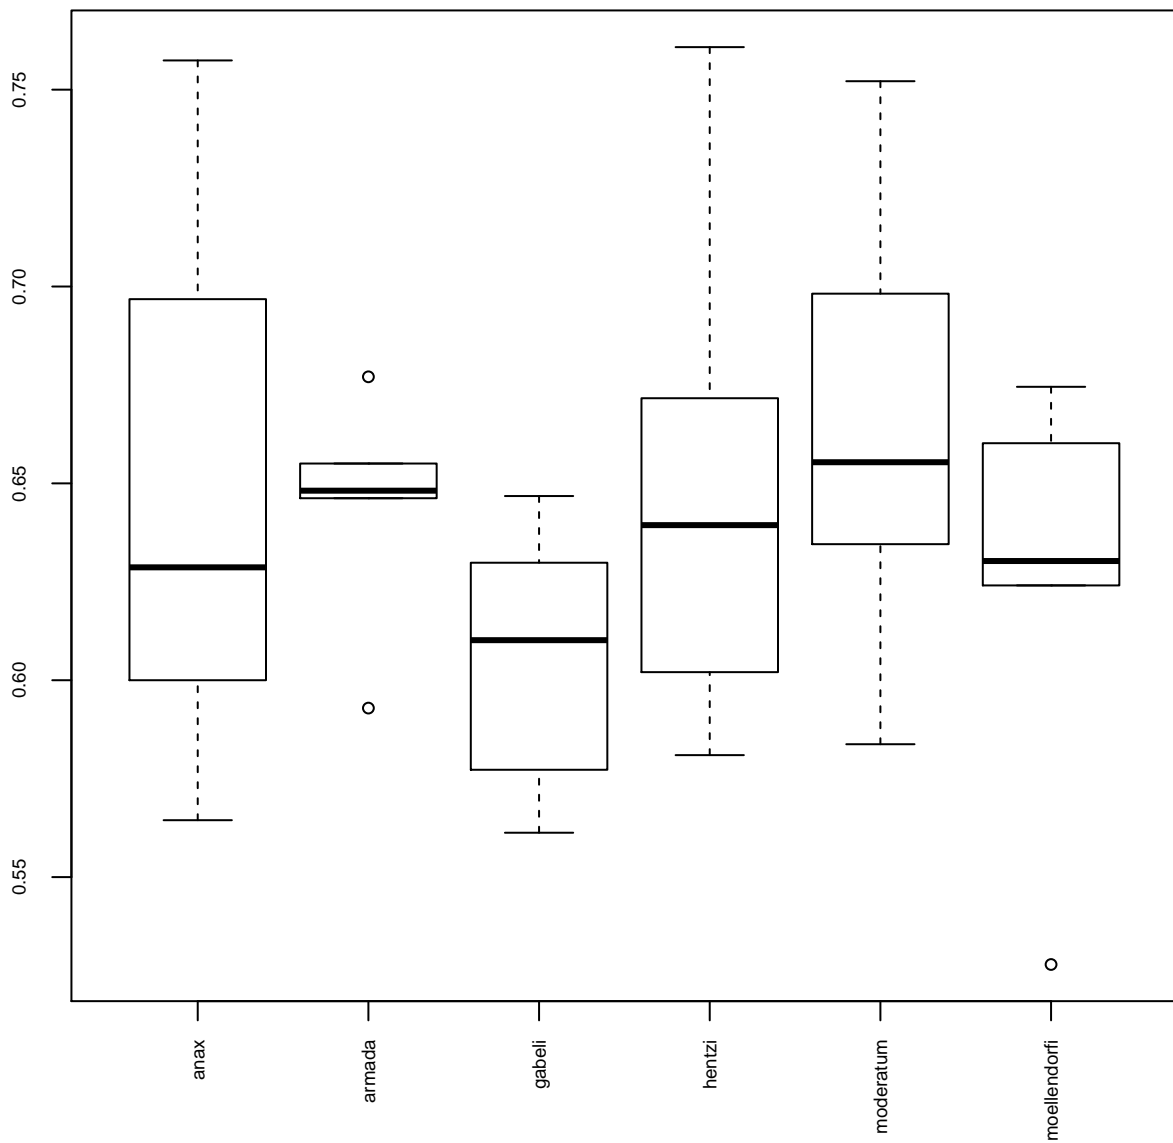

Supplement: Supplementary file 653

# Tarsus 3/Tarsus 4 ratio – males

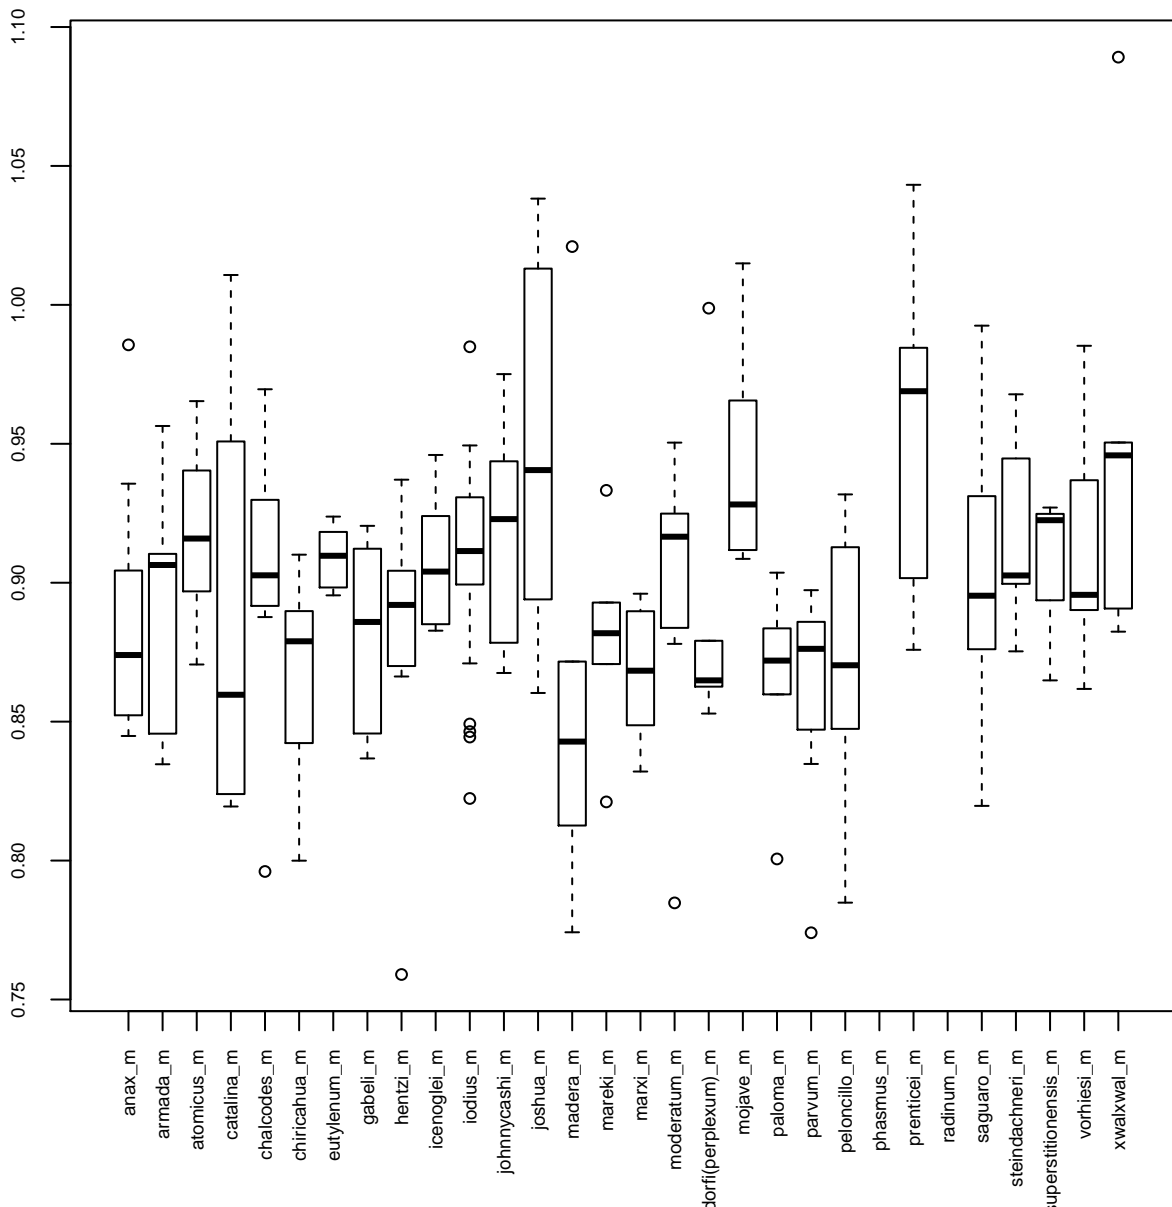

Supplement: Supplementary file 654

## Tibia 3/Tibia 4 ratio – females

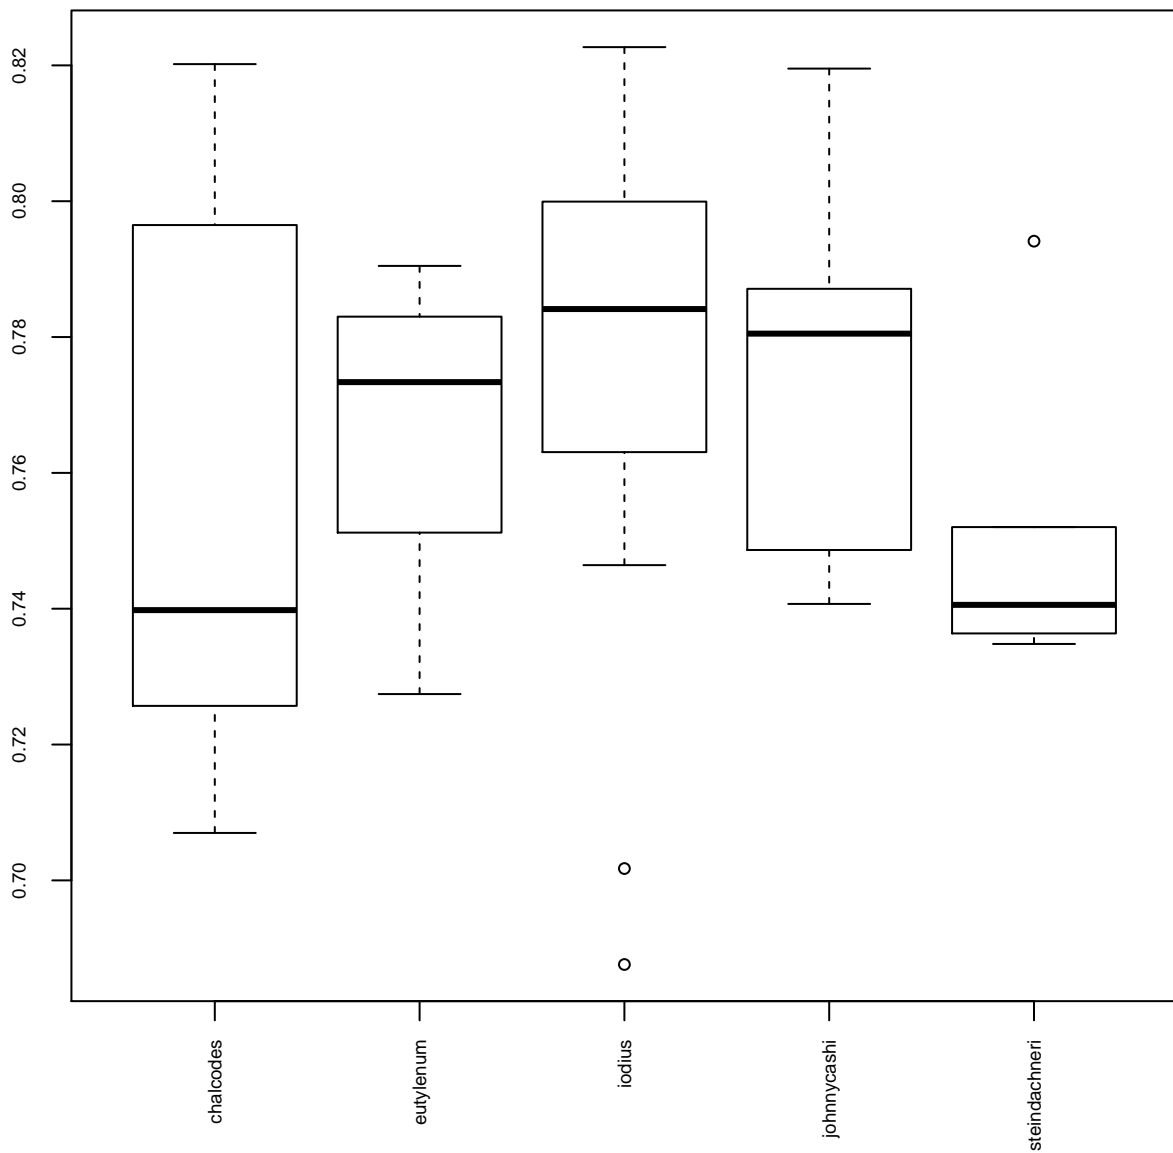

Supplement: Supplementary file 655

# Metatarsus 1/Tibia 3 Length ratio – females

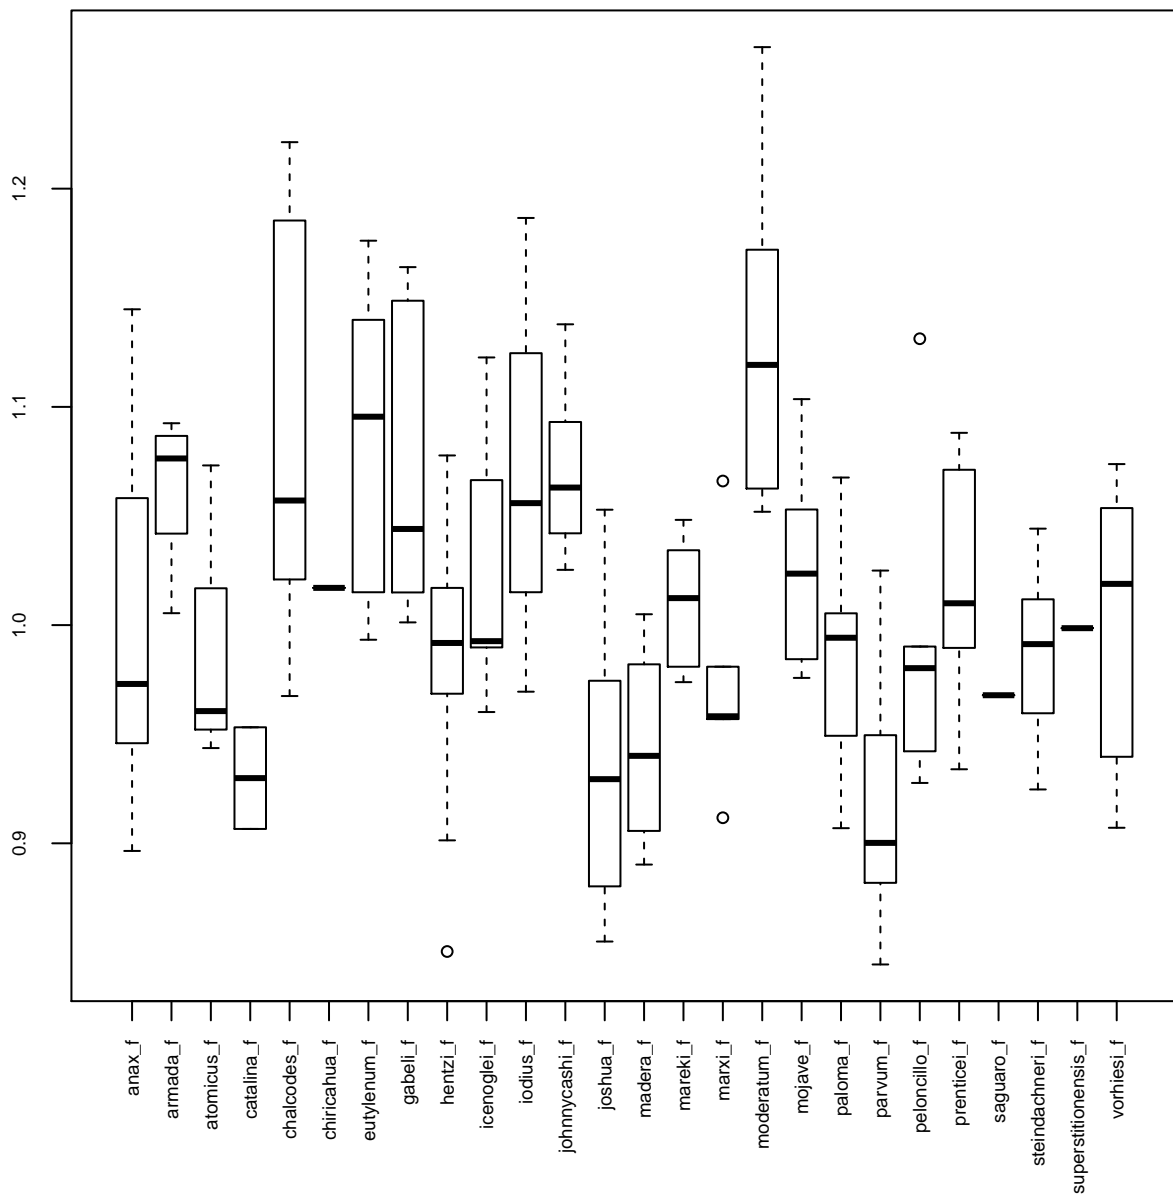

Supplement: Supplementary file 656

## Femur 1/Patella 4 ratio – males

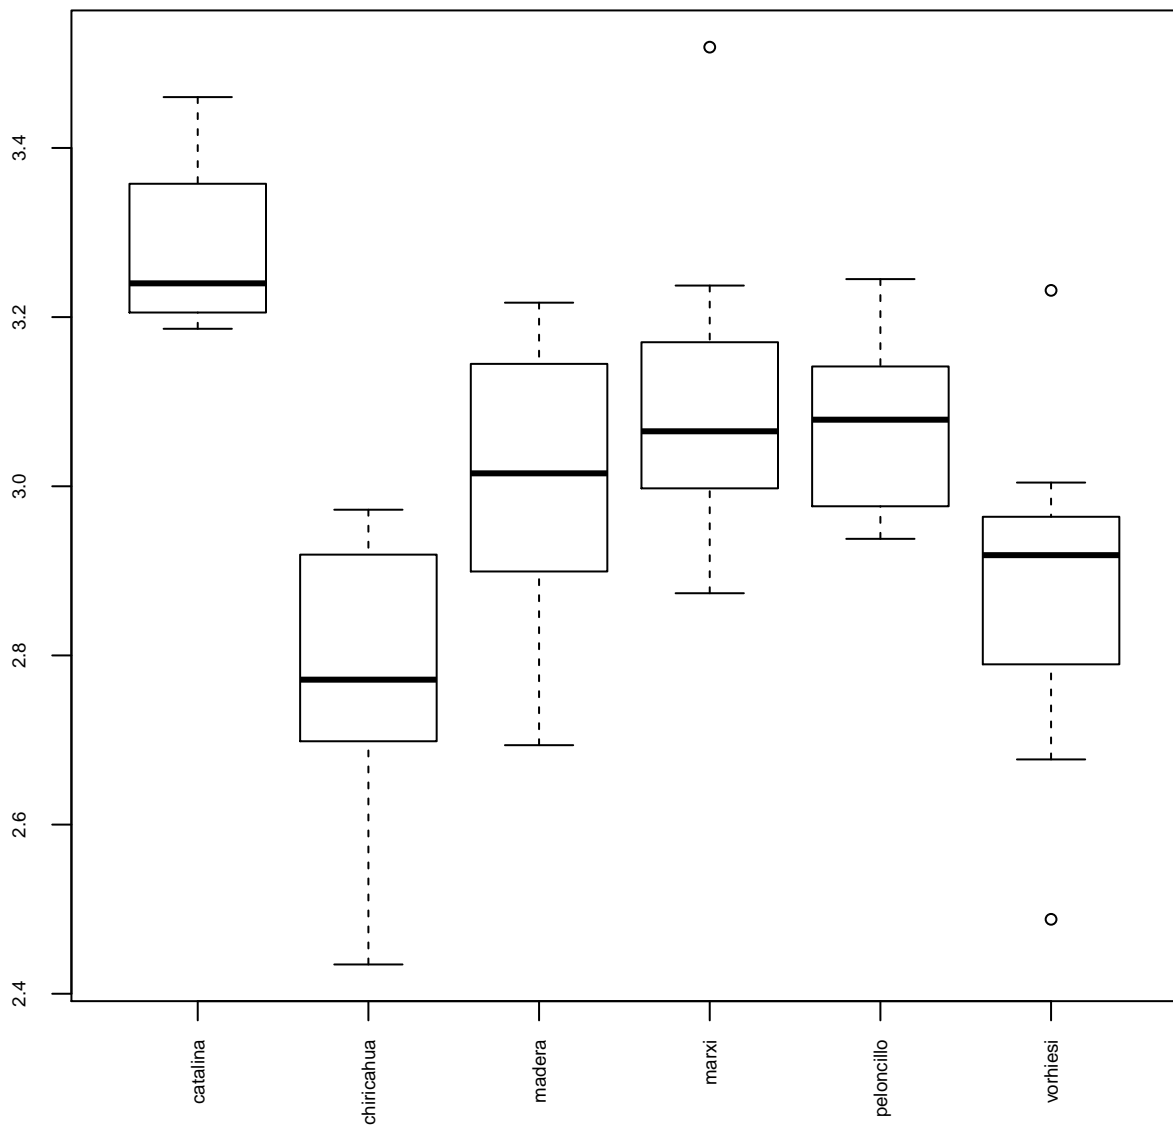

Supplement: Supplementary file 657

## Metatarsus 4/Tarsus 4 ratio – females

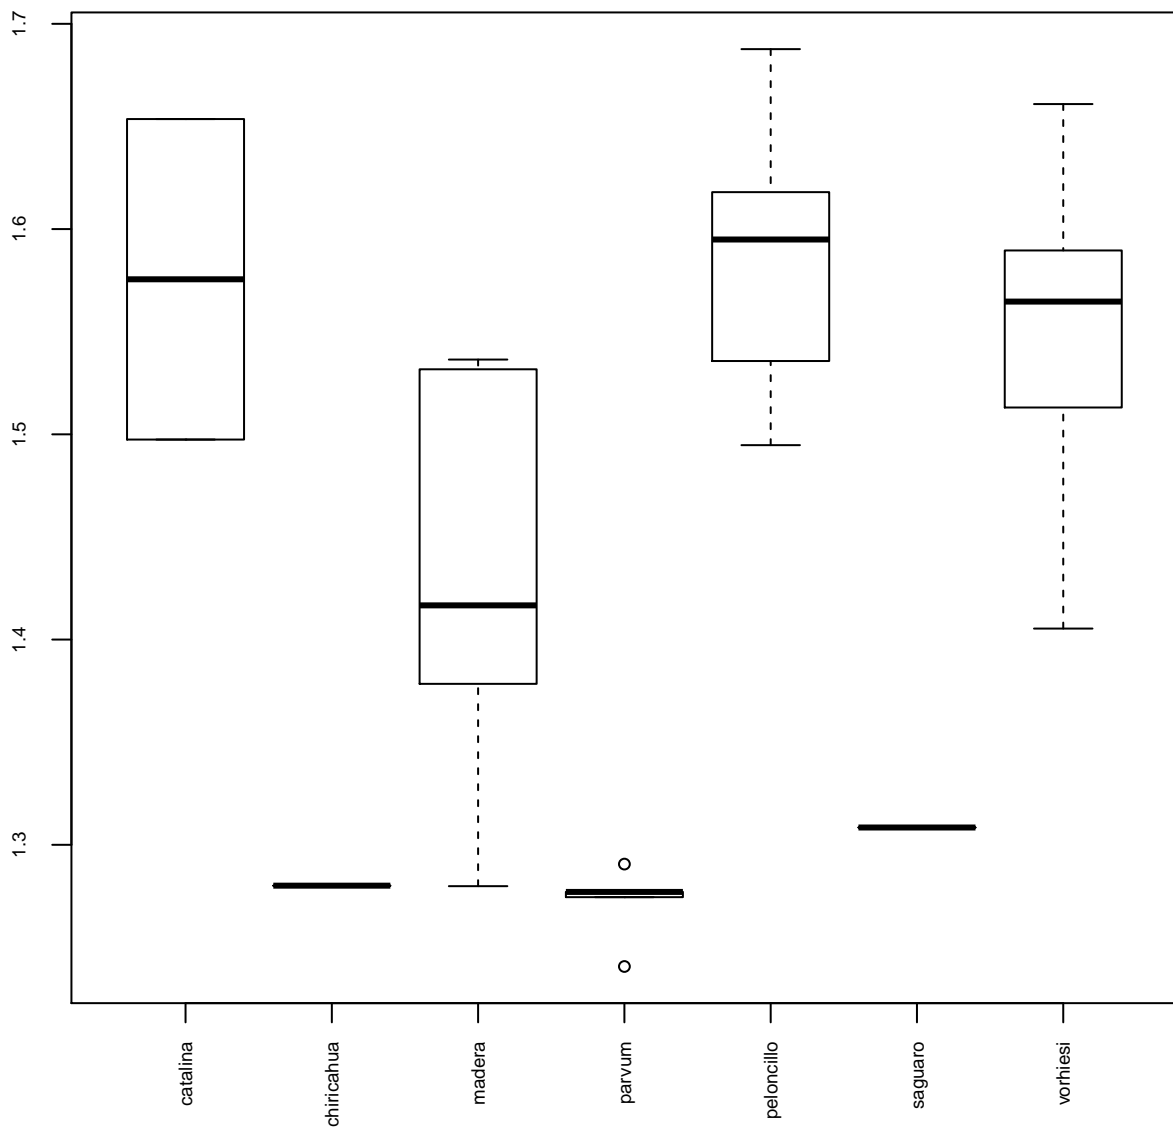

Supplement: Supplementary file 658

## Carapace Length/Metatarsus 1 ratio – females

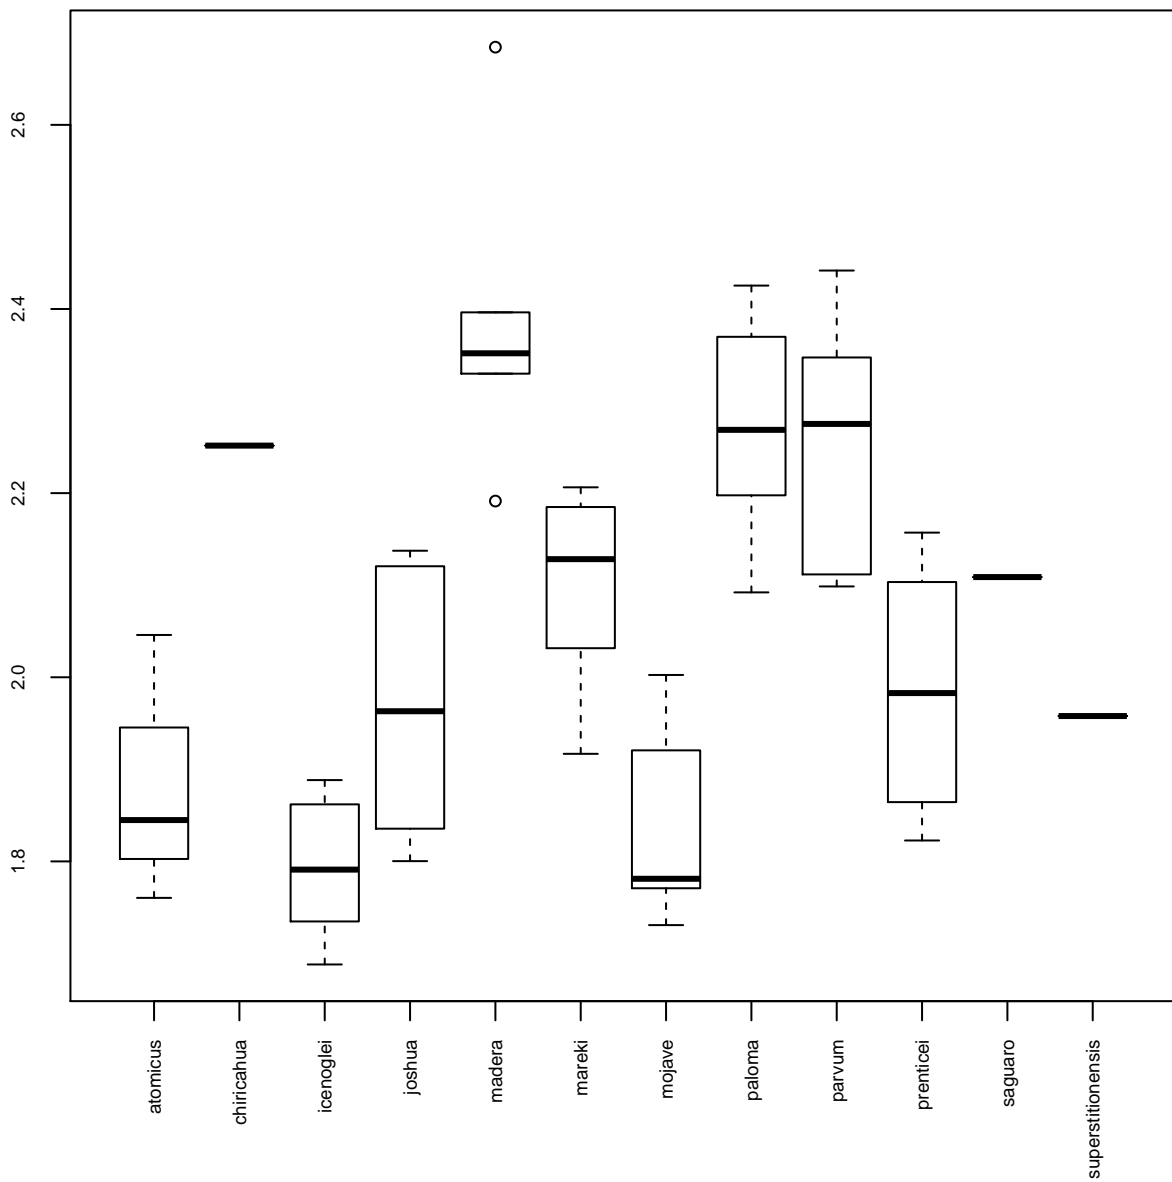

Supplement: Supplementary file 659

## Carapace Length/Tarsus 1 ratio – males

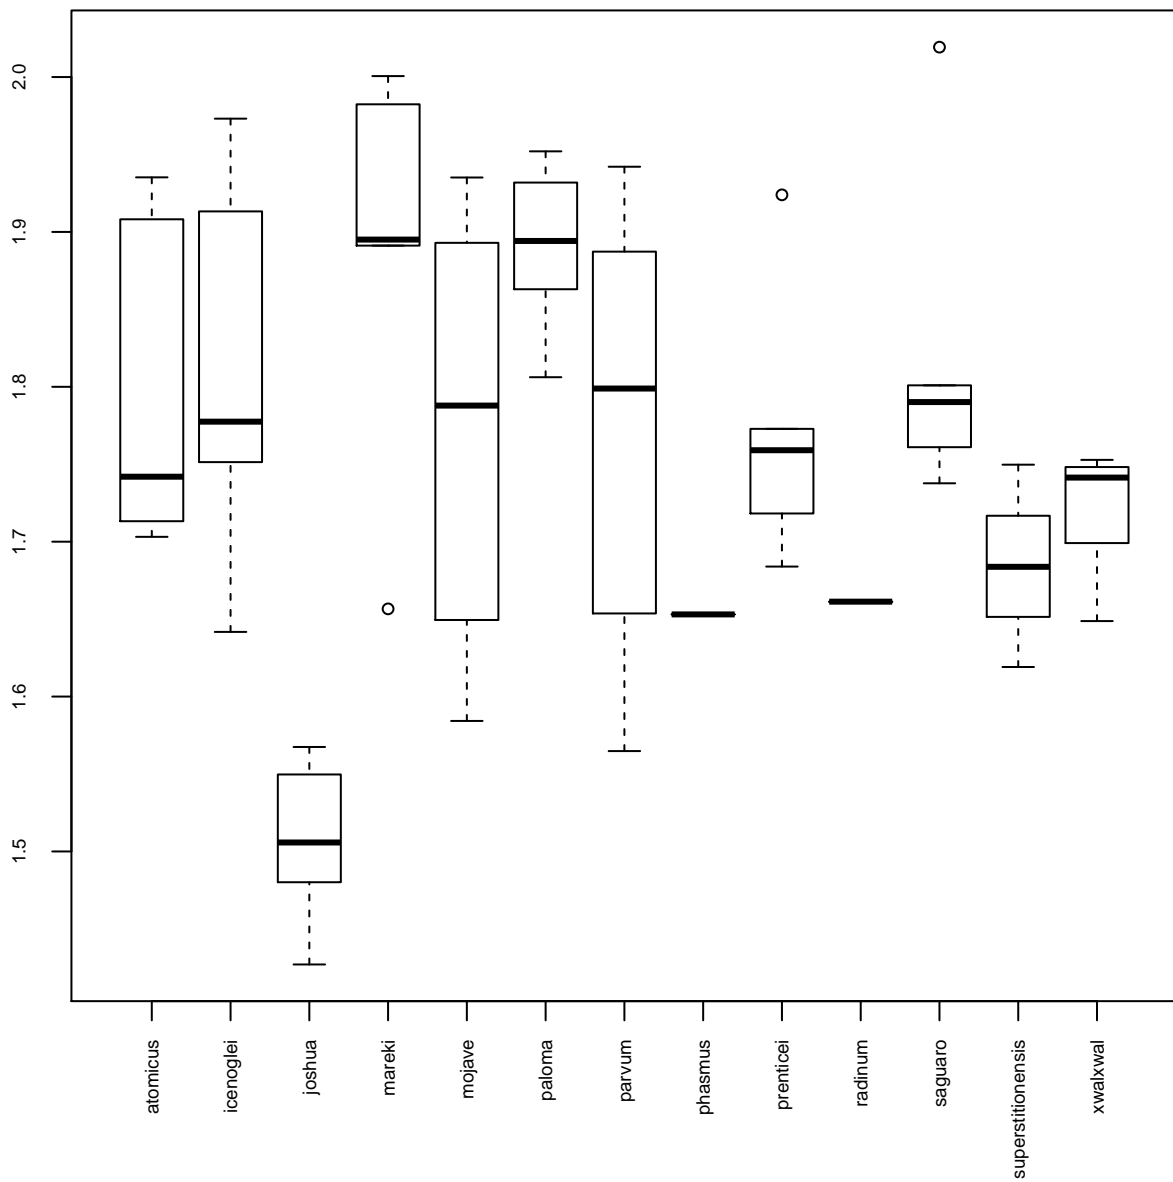

Supplement: Supplementary file 660

## Leg 4 Length – males

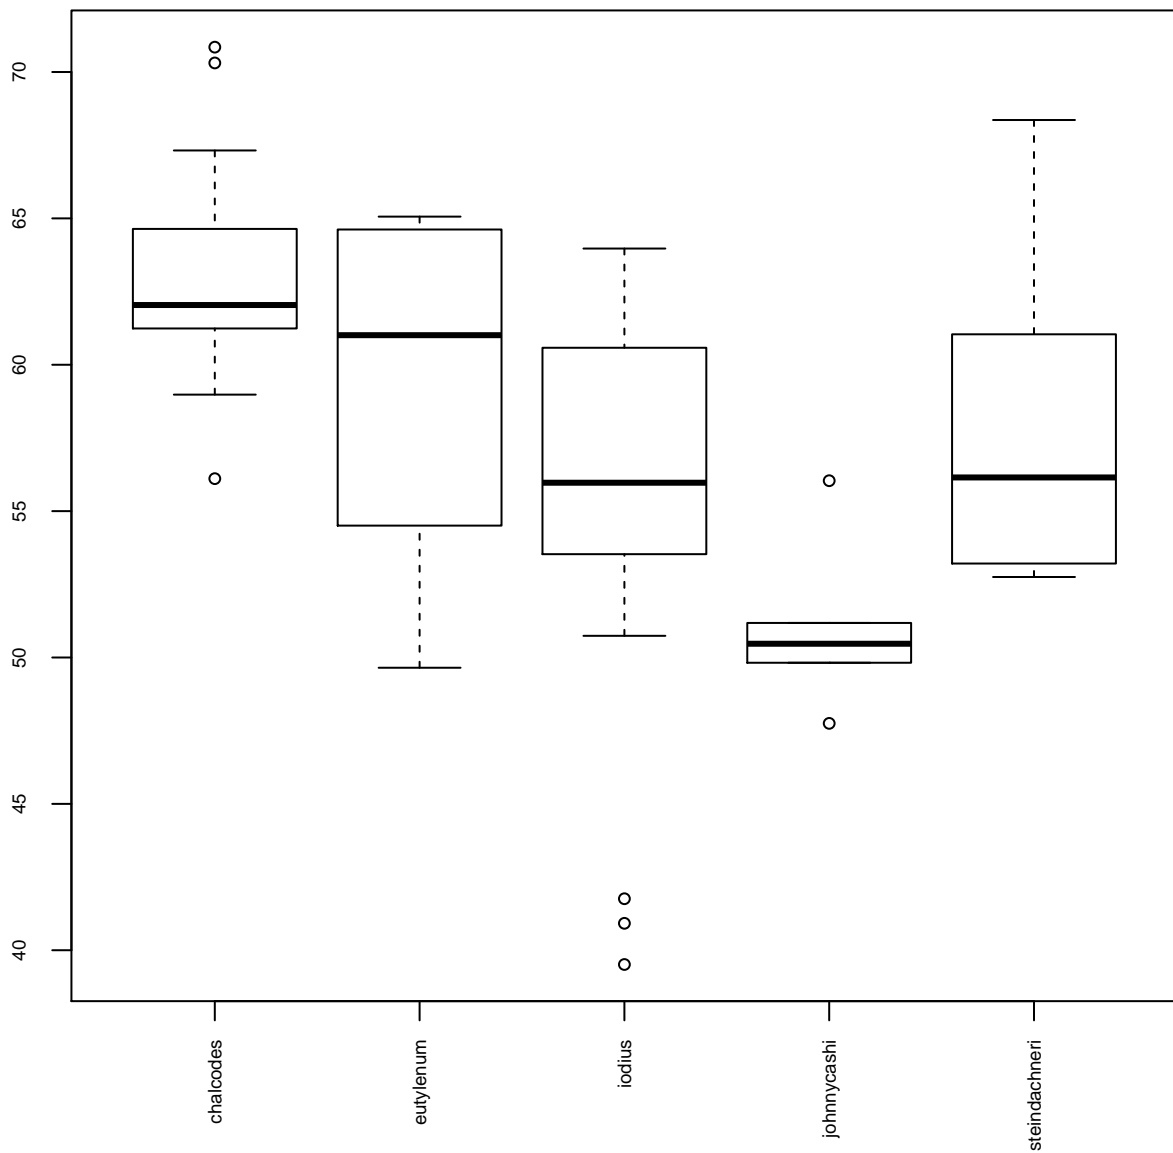

Supplement: Supplementary file 661

## Patella 1/Tibia 3 Length ratio – females

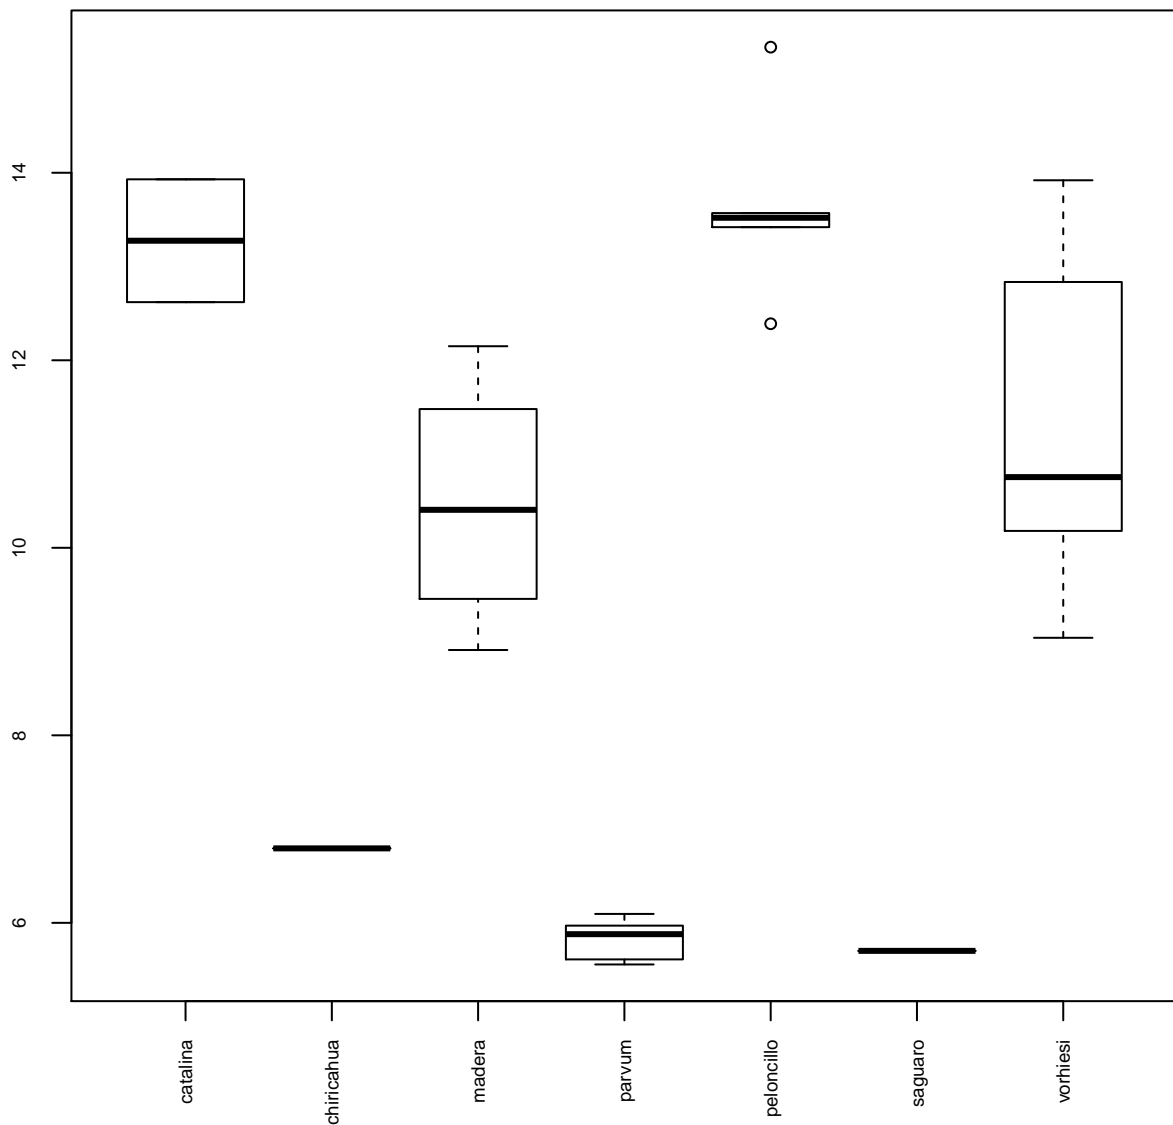

Supplement: Supplementary file 662

## Tarsus 3/Patella 4 Length ratio – females

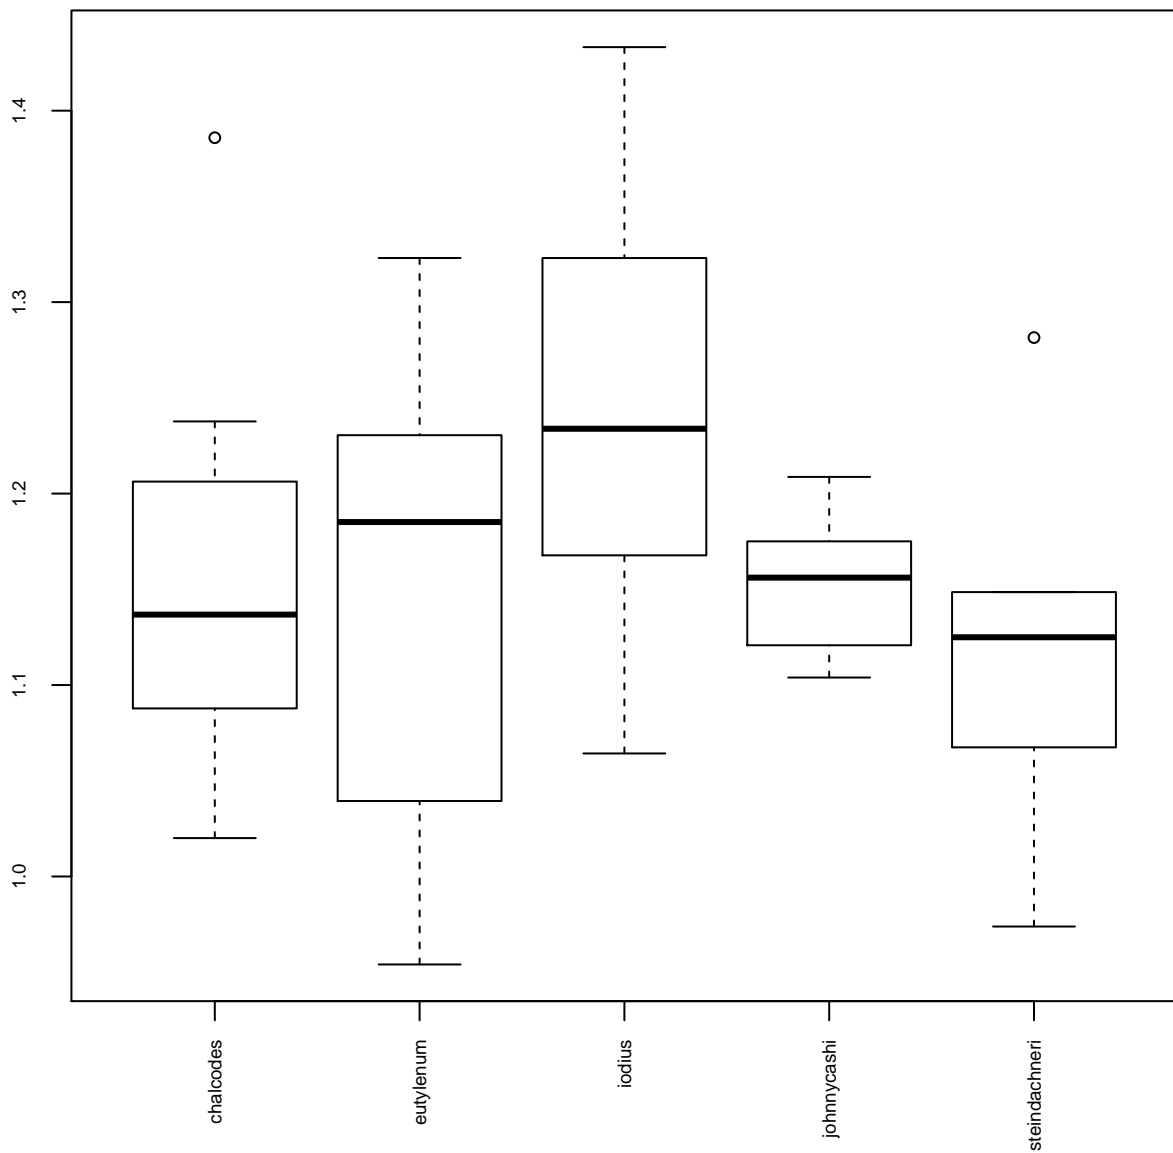

Supplement: Supplementary file 663

# Metatarsus 1/Femur 3 Length ratio – males

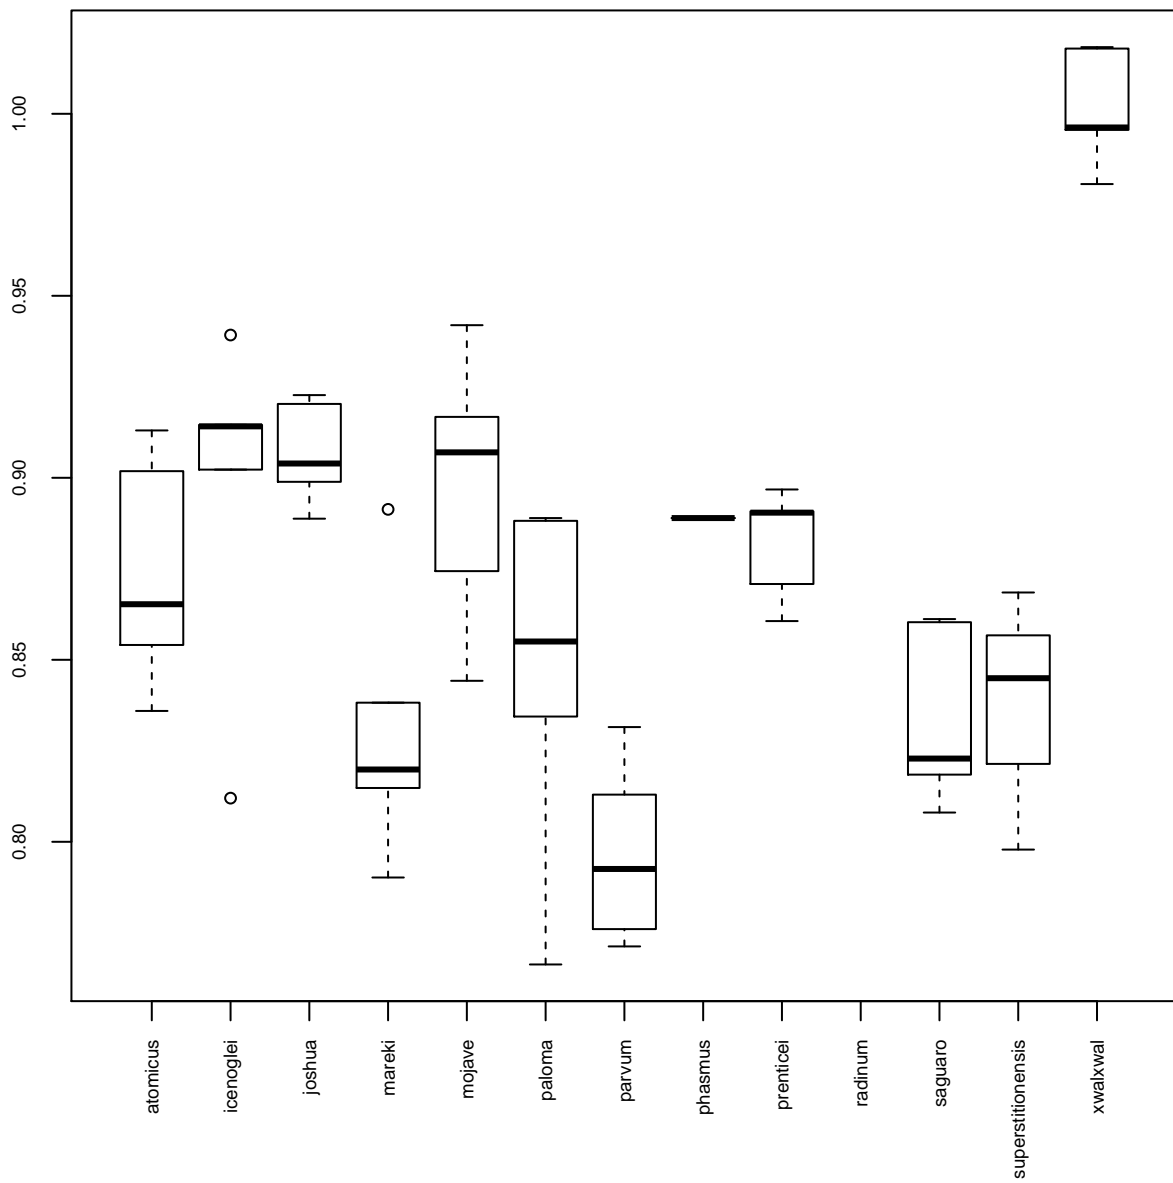

Supplement: Supplementary file 664

## Femur 1/Metatarsus 1 ratio – females

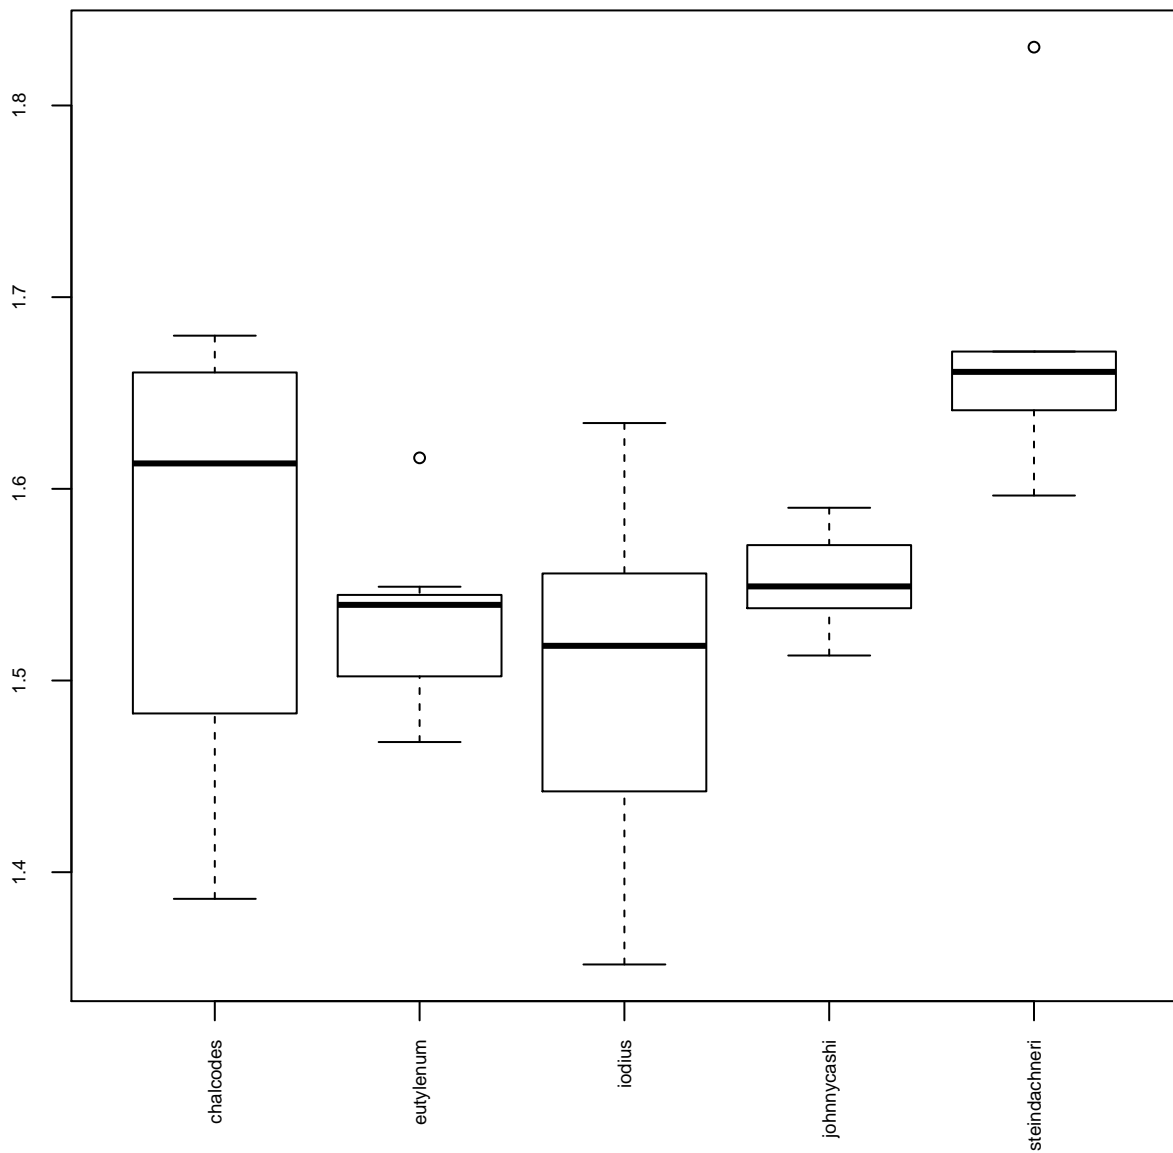

Supplement: Supplementary file 665

Carapace Length/Patella 3 ratio – females

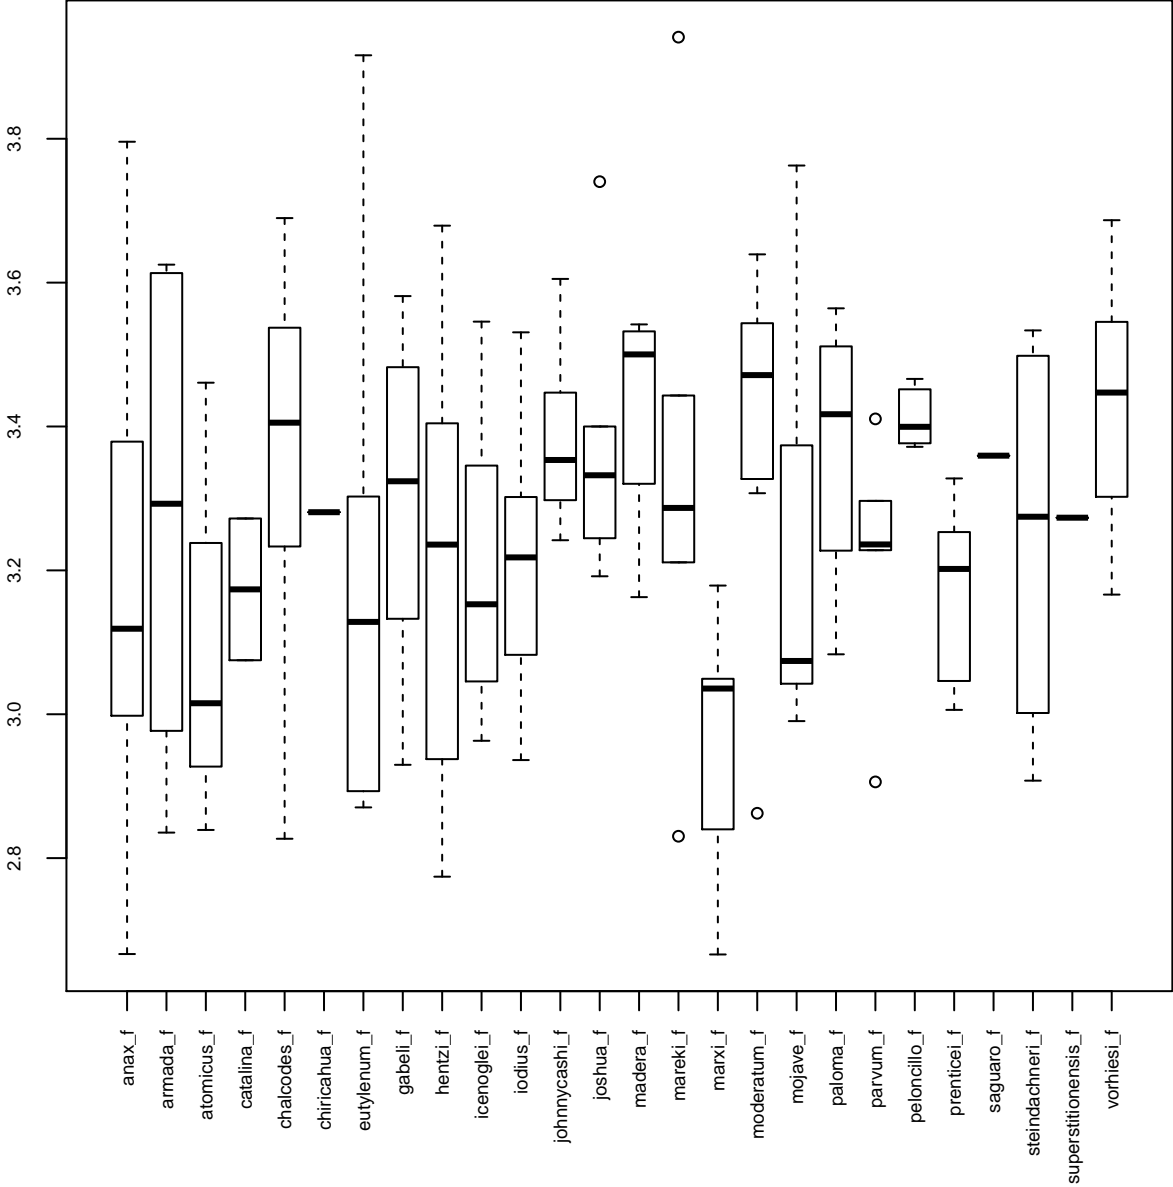

Supplement: Supplementary file 666

## Carapace Length/Femur 4 ratio – females

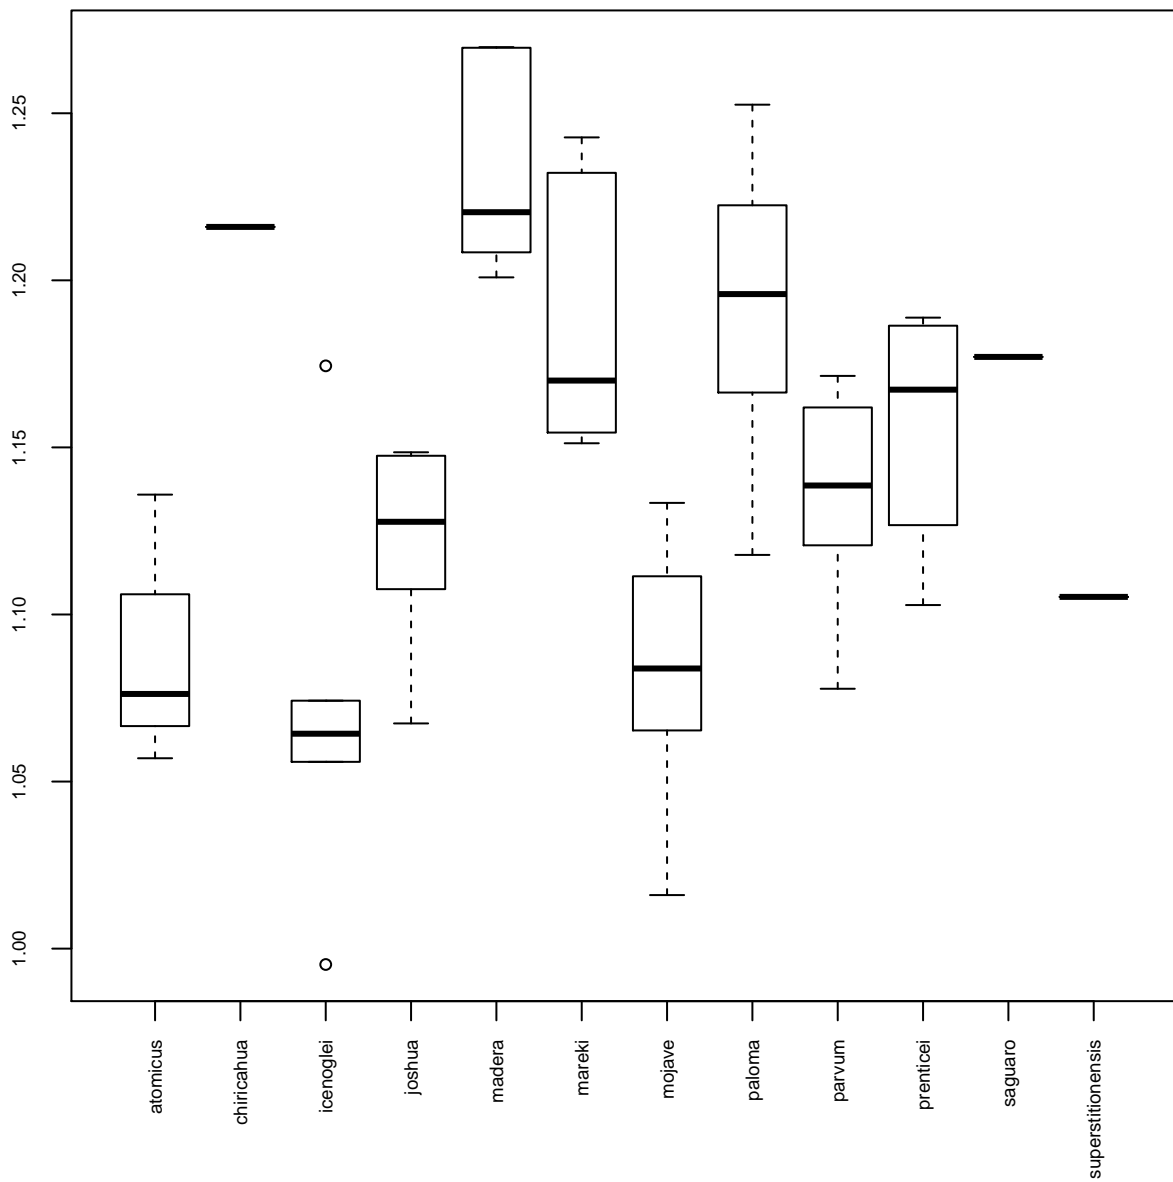

Supplement: Supplementary file 667

## Carapace Length – males

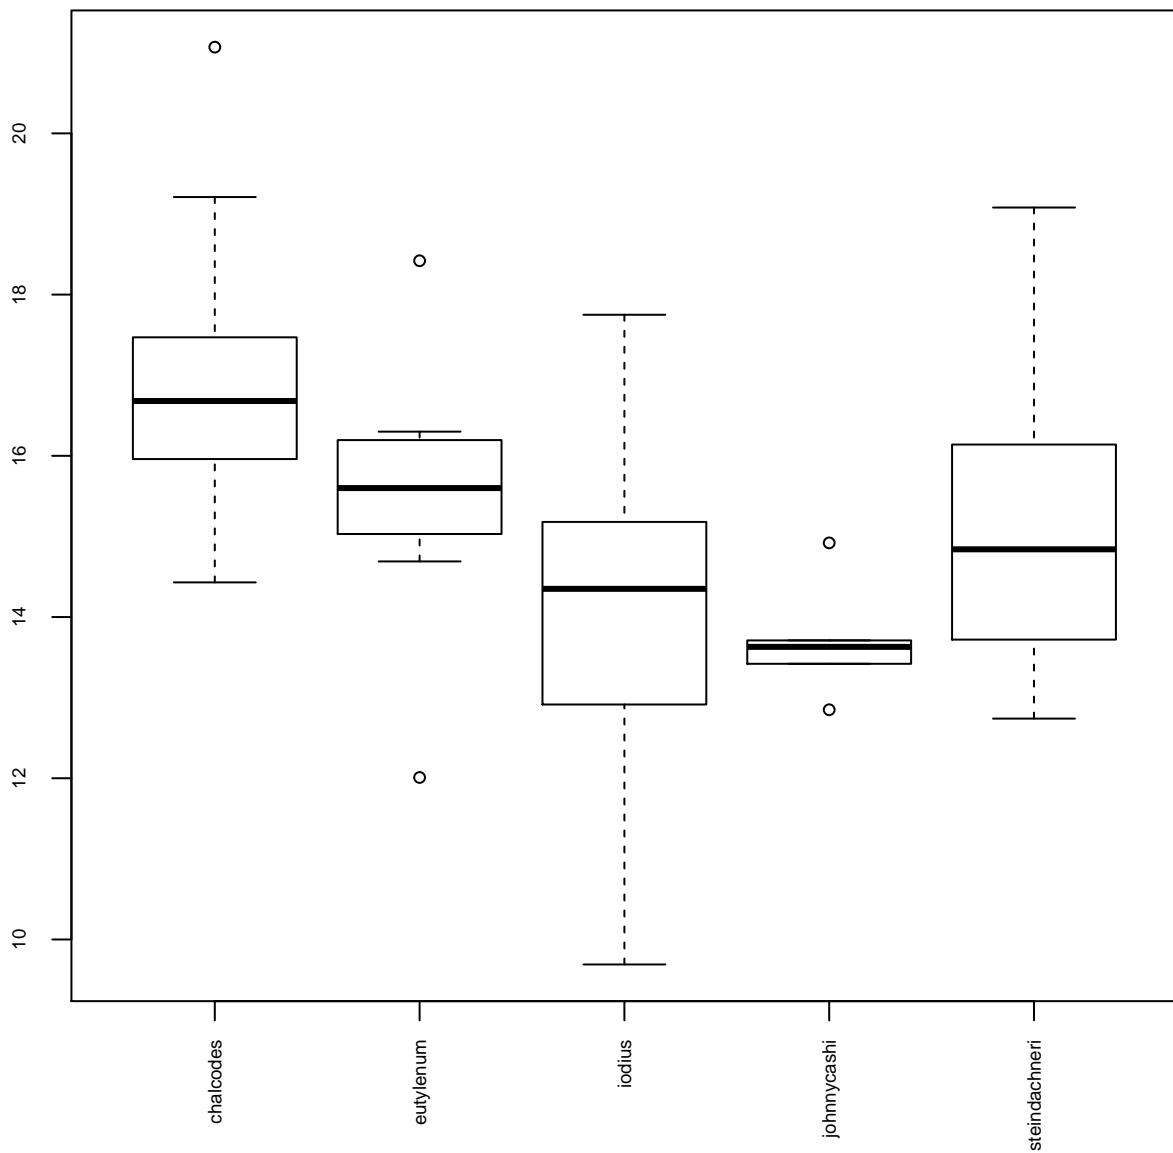

Supplement: Supplementary file 668

## Tarsus 1/Patella 3 Length ratio – females

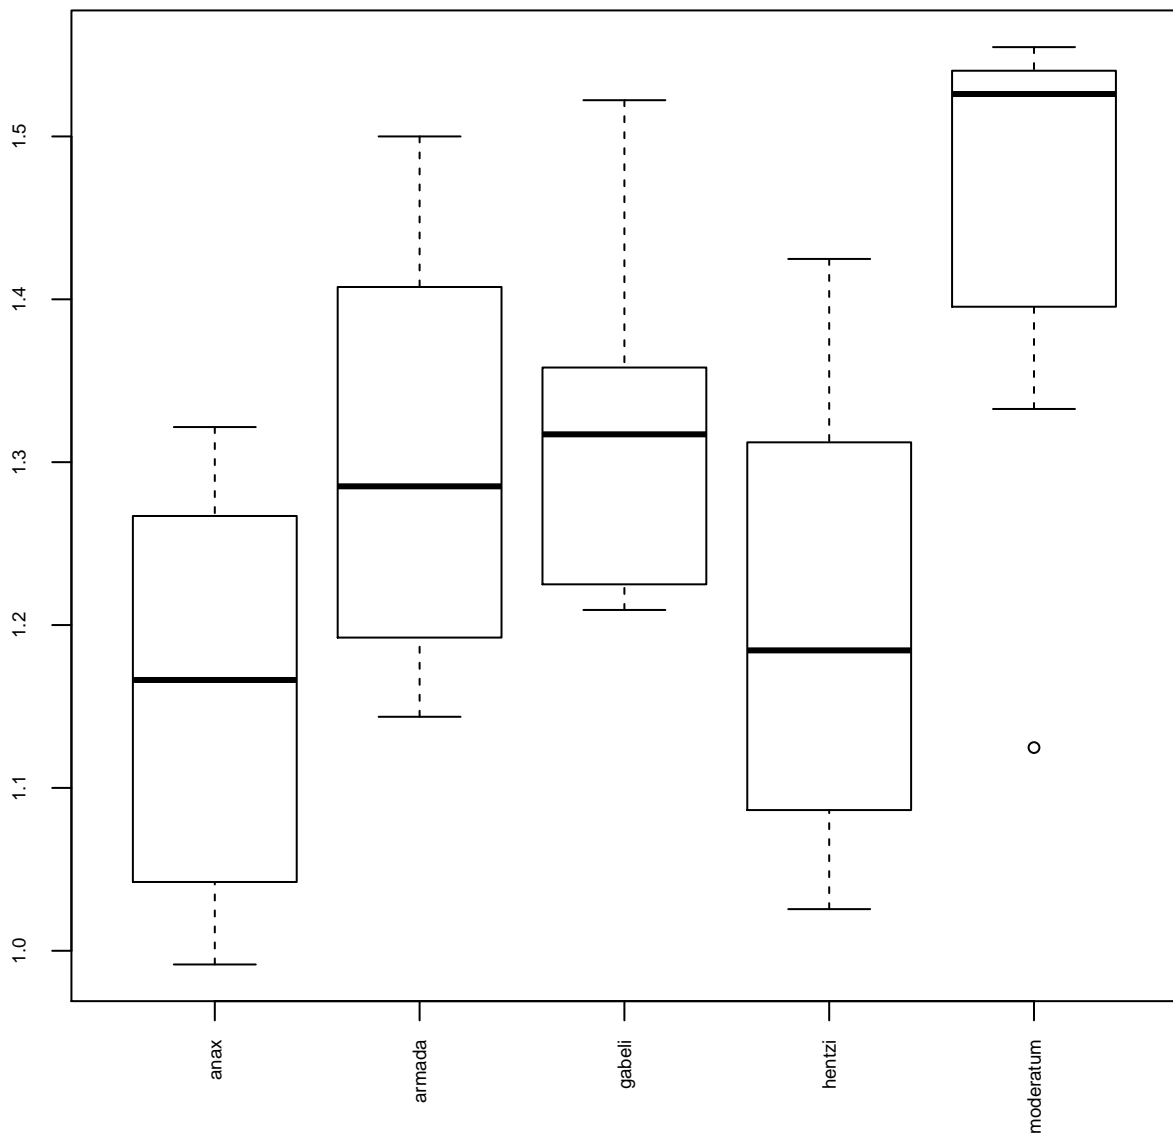

Supplement: Supplementary file 669

## Patella 1/Patella 3 ratio – males

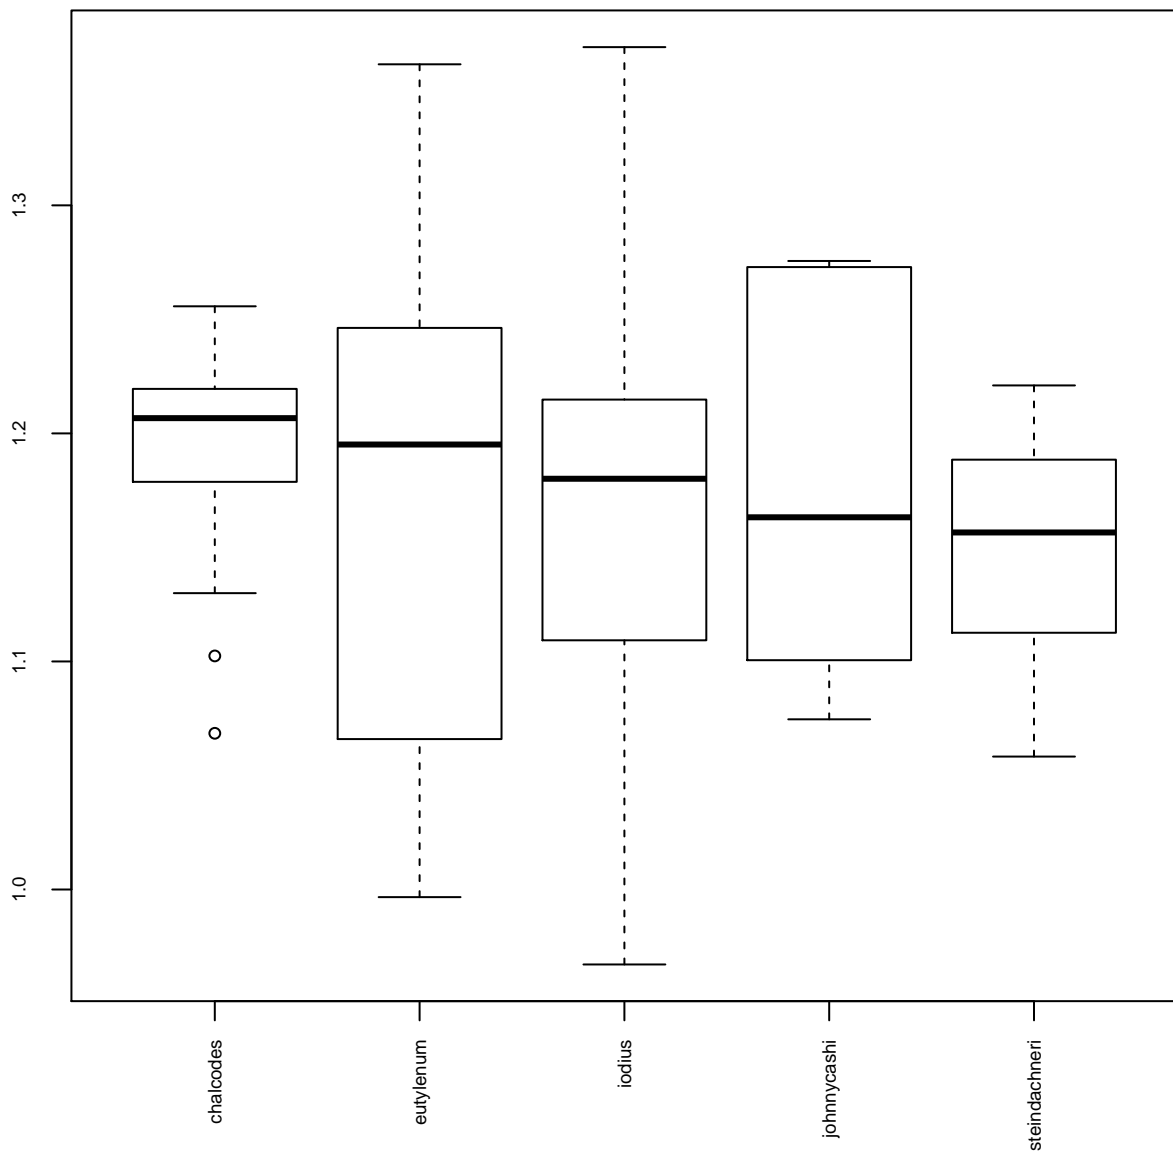

Supplement: Supplementary file 670

## Carapace Length – females

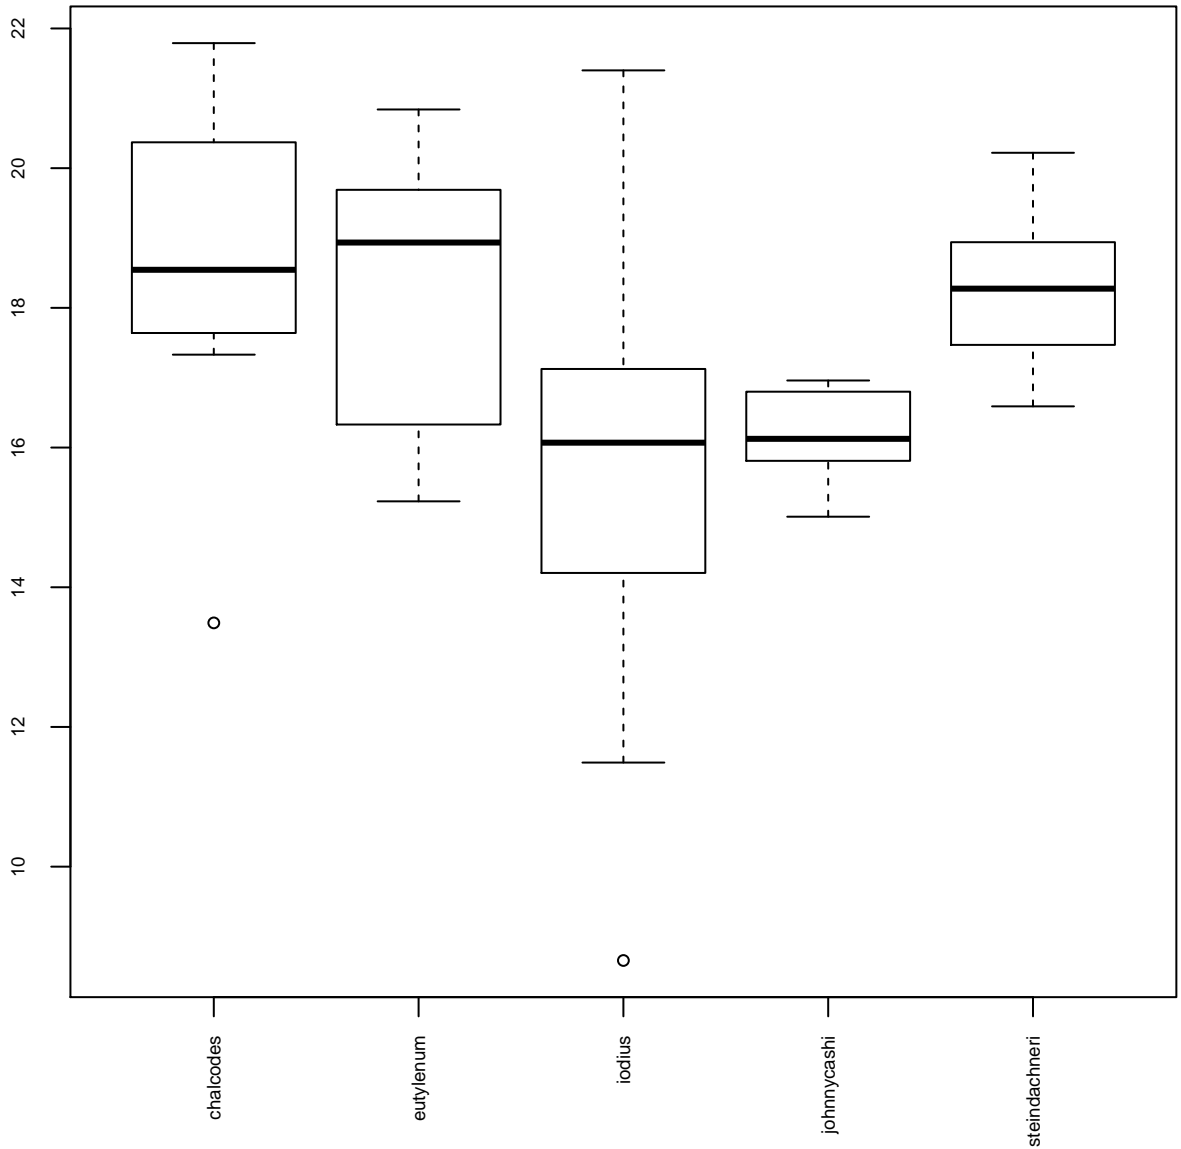

Supplement: Supplementary file 671

## Tibia 1/Patella 3 Length ratio – males

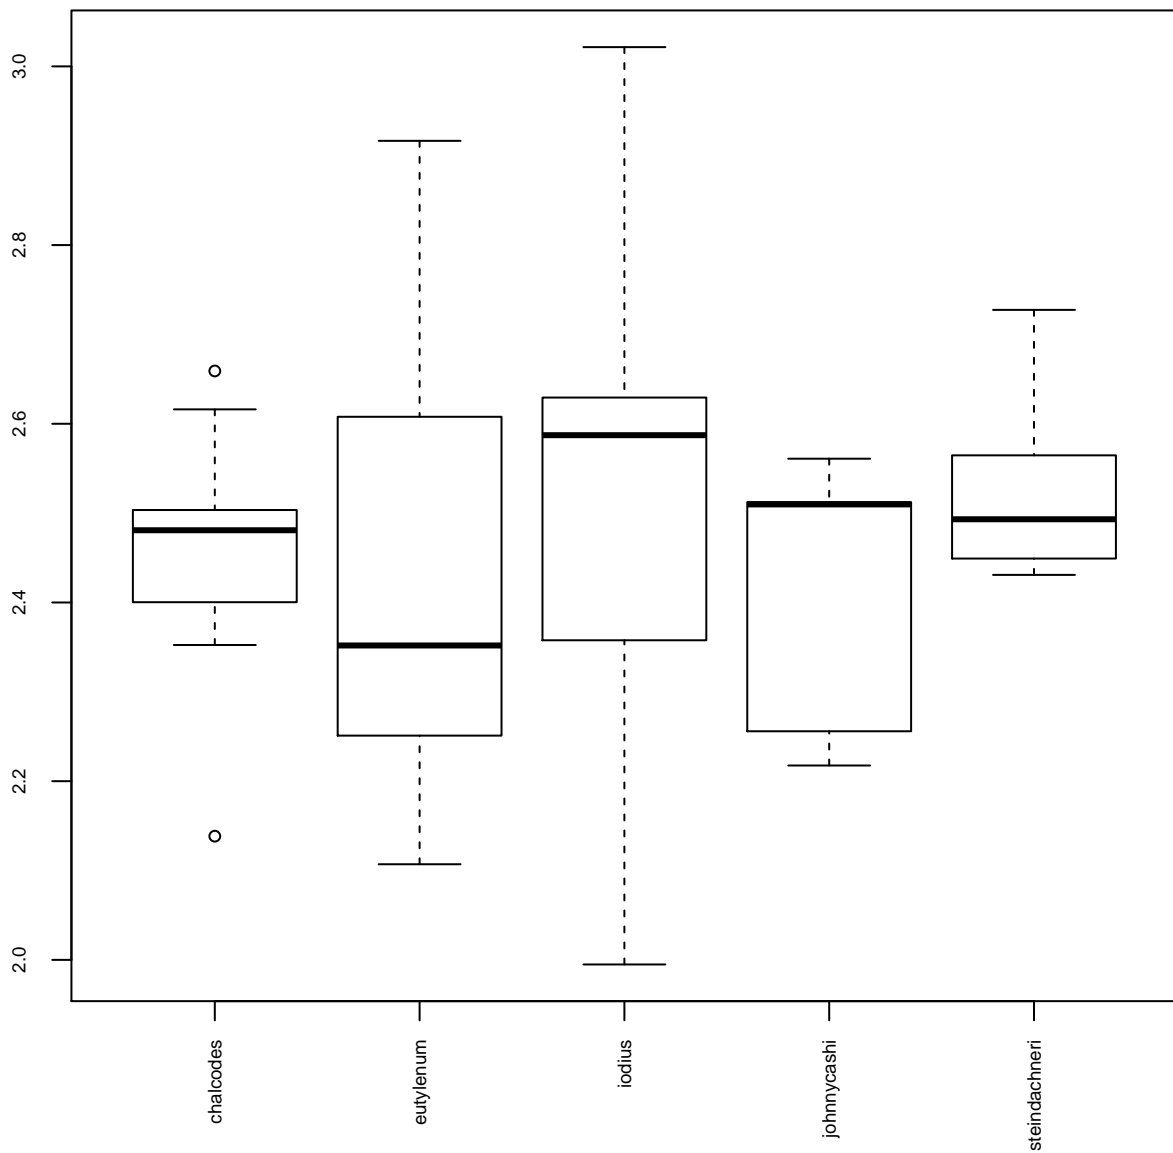

Supplement: Supplementary file 672

## Carapace Length/Width ratio – males

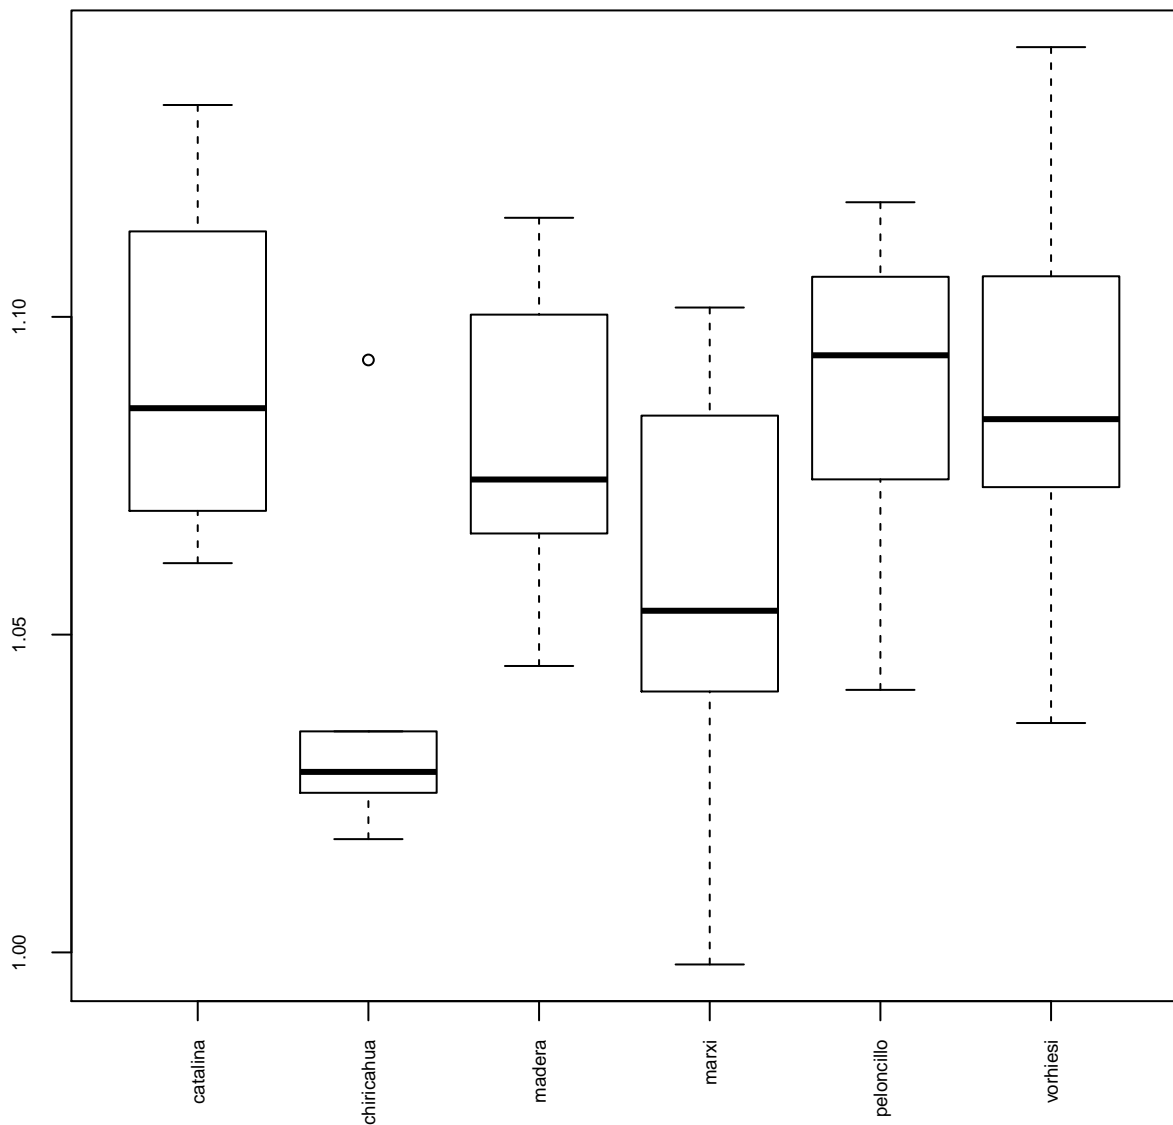

Supplement: Supplementary file 673

## Femur 3/Tarsus 3 ratio – males

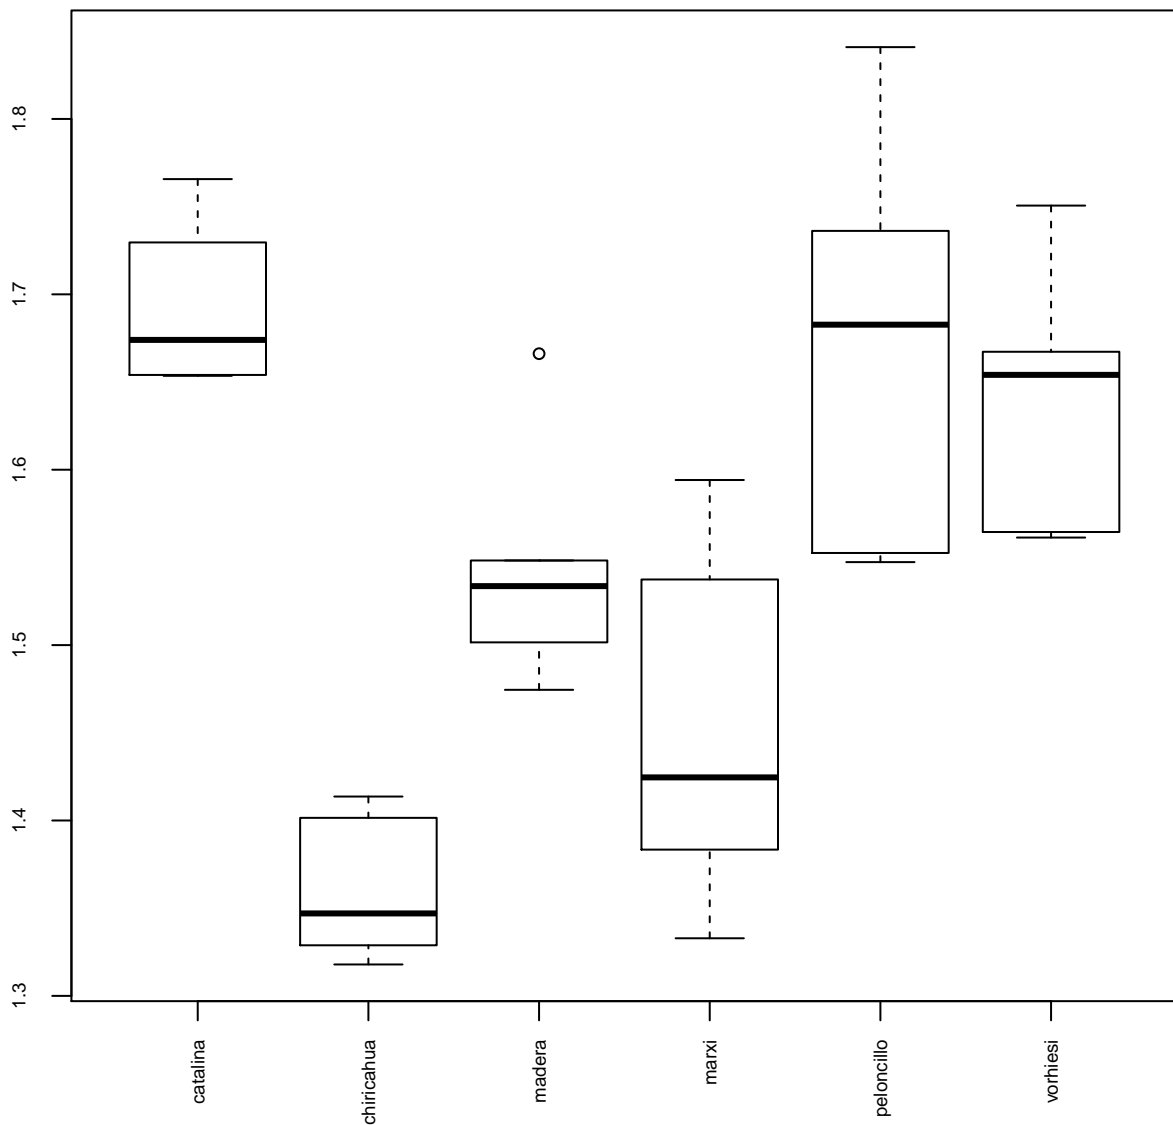

Supplement: Supplementary file 674

## Labial Length/Width ratio – males

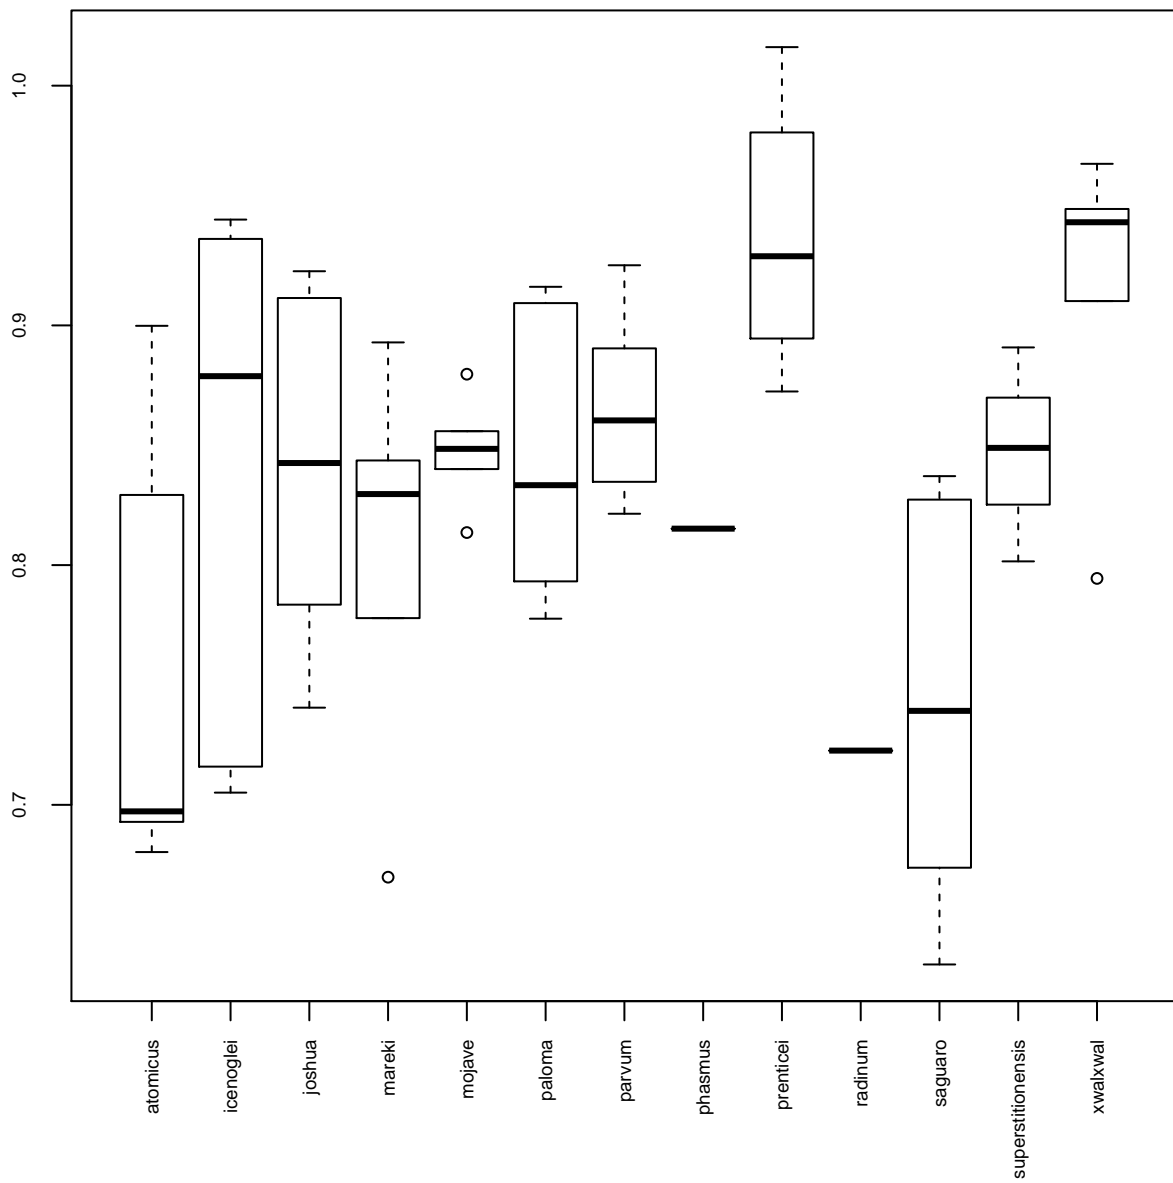

Supplement: Supplementary file 675

# Tibia 3/Patella 4 Length ratio – males

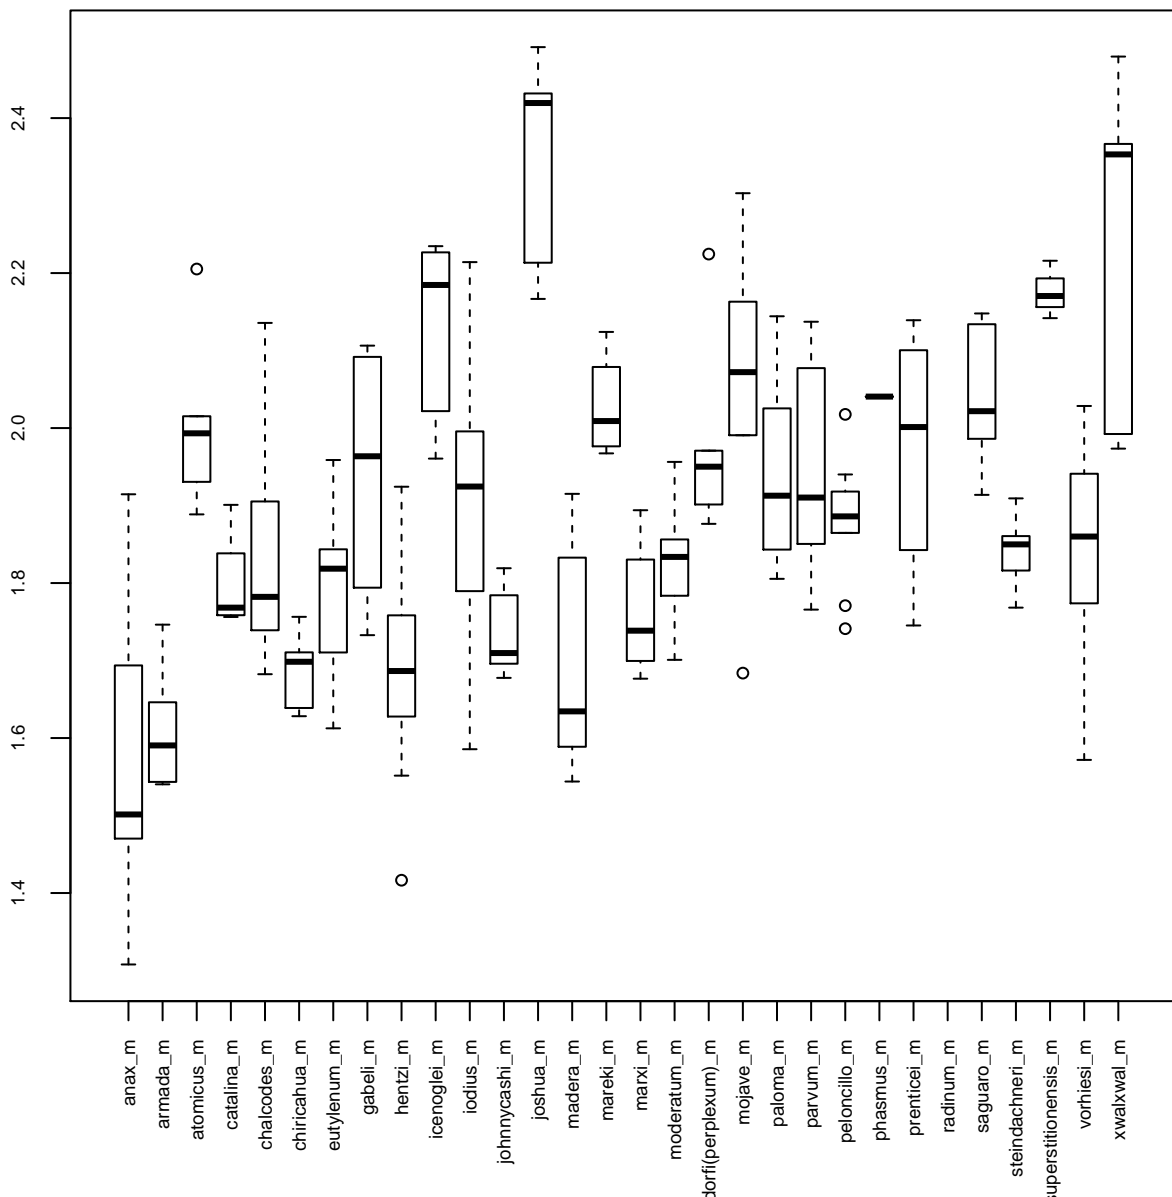

Supplement: Supplementary file 676

## Metatarsus 1/Femur 3 Length ratio – females

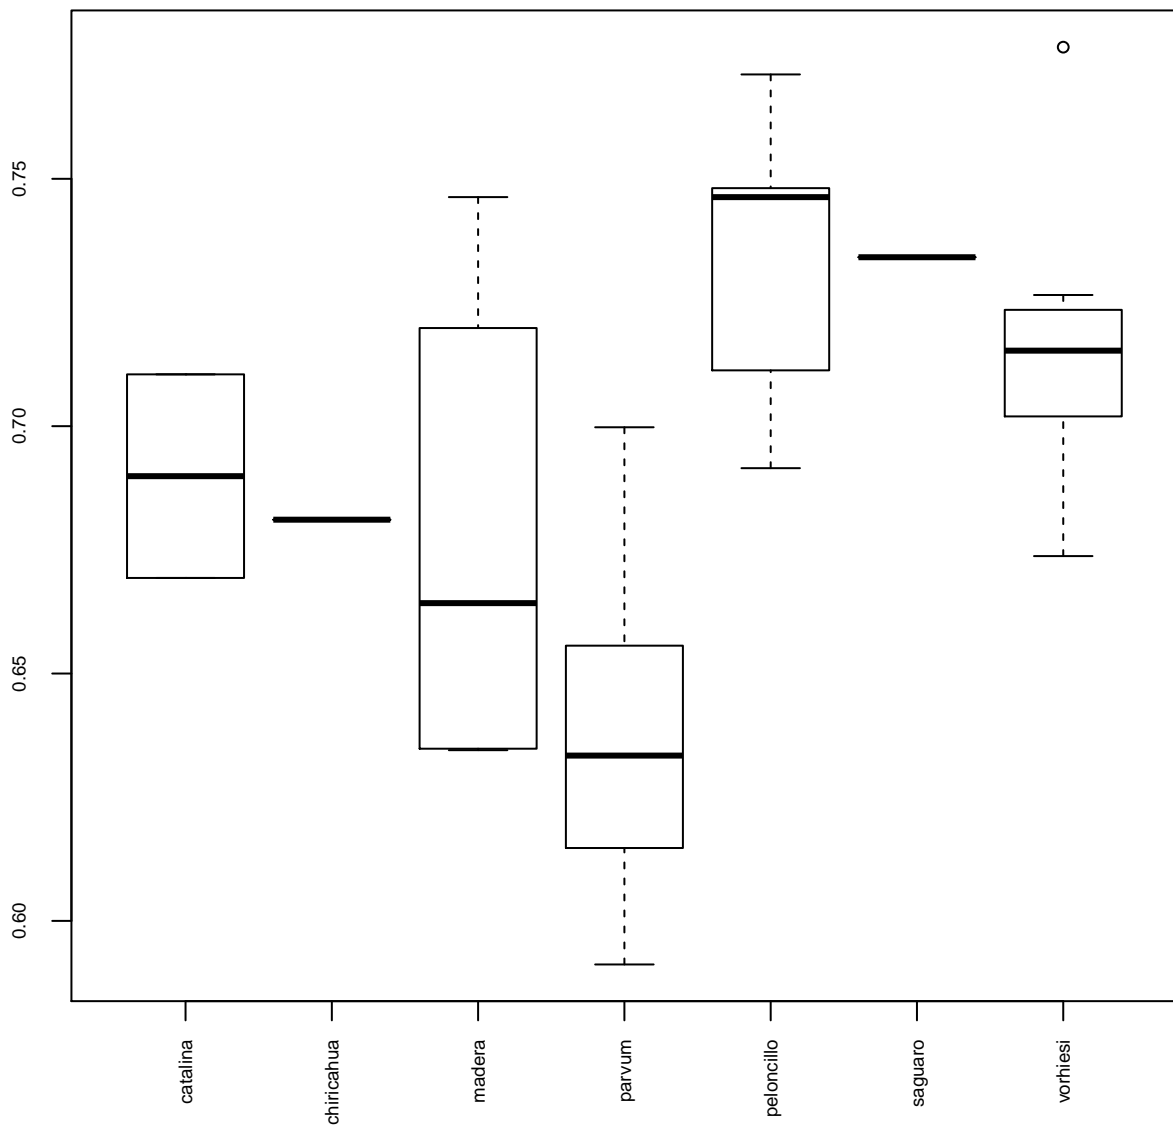

Supplement: Supplementary file 677

## Tibia 4/Tarsus 4 ratio – males

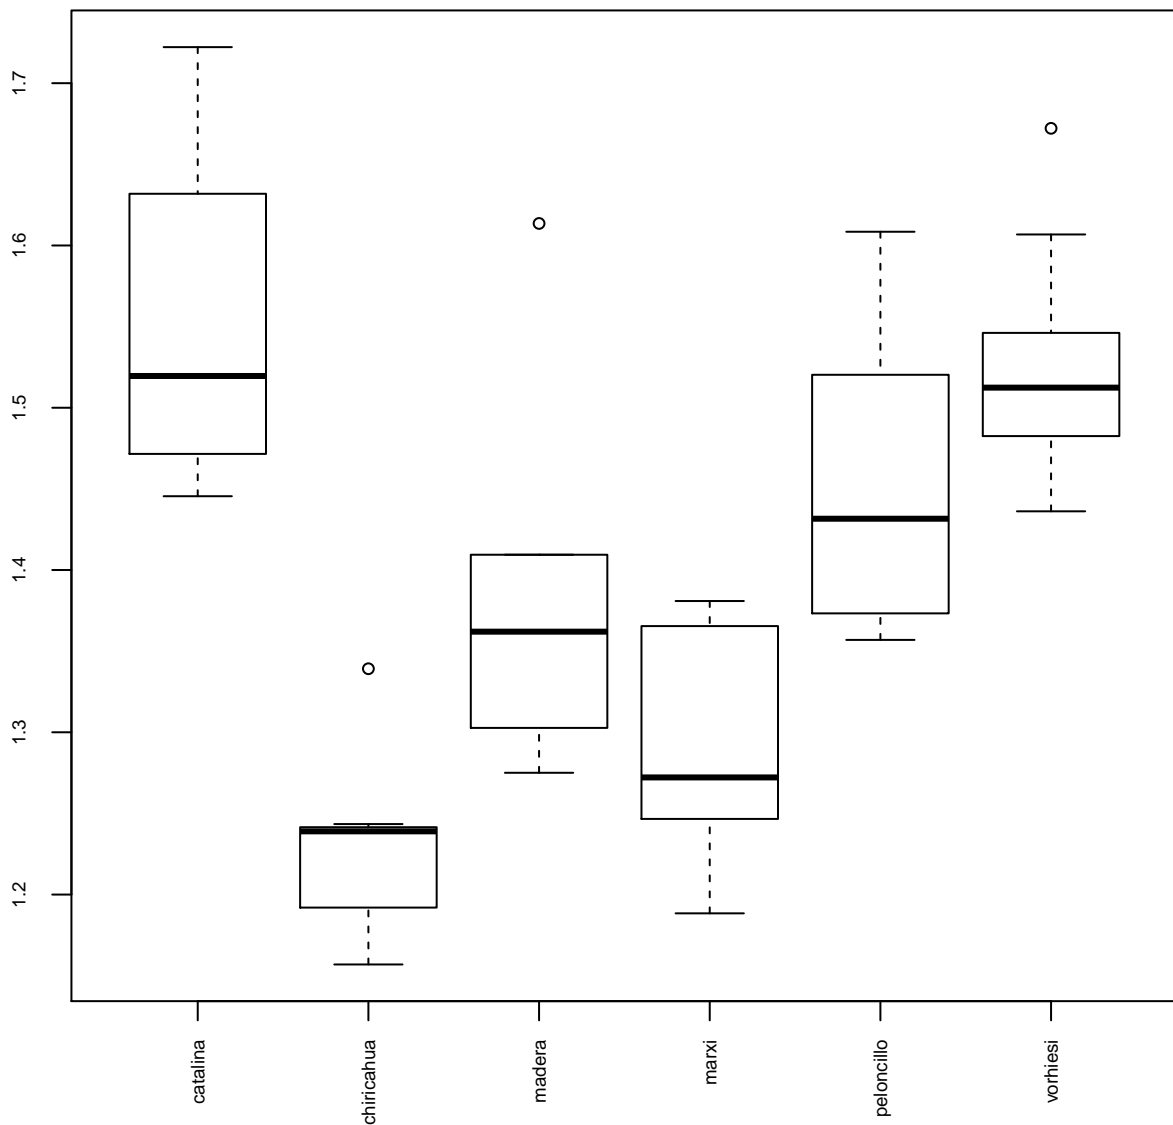

Supplement: Supplementary file 678

## Patella 1/Tibia 3 Length ratio – males

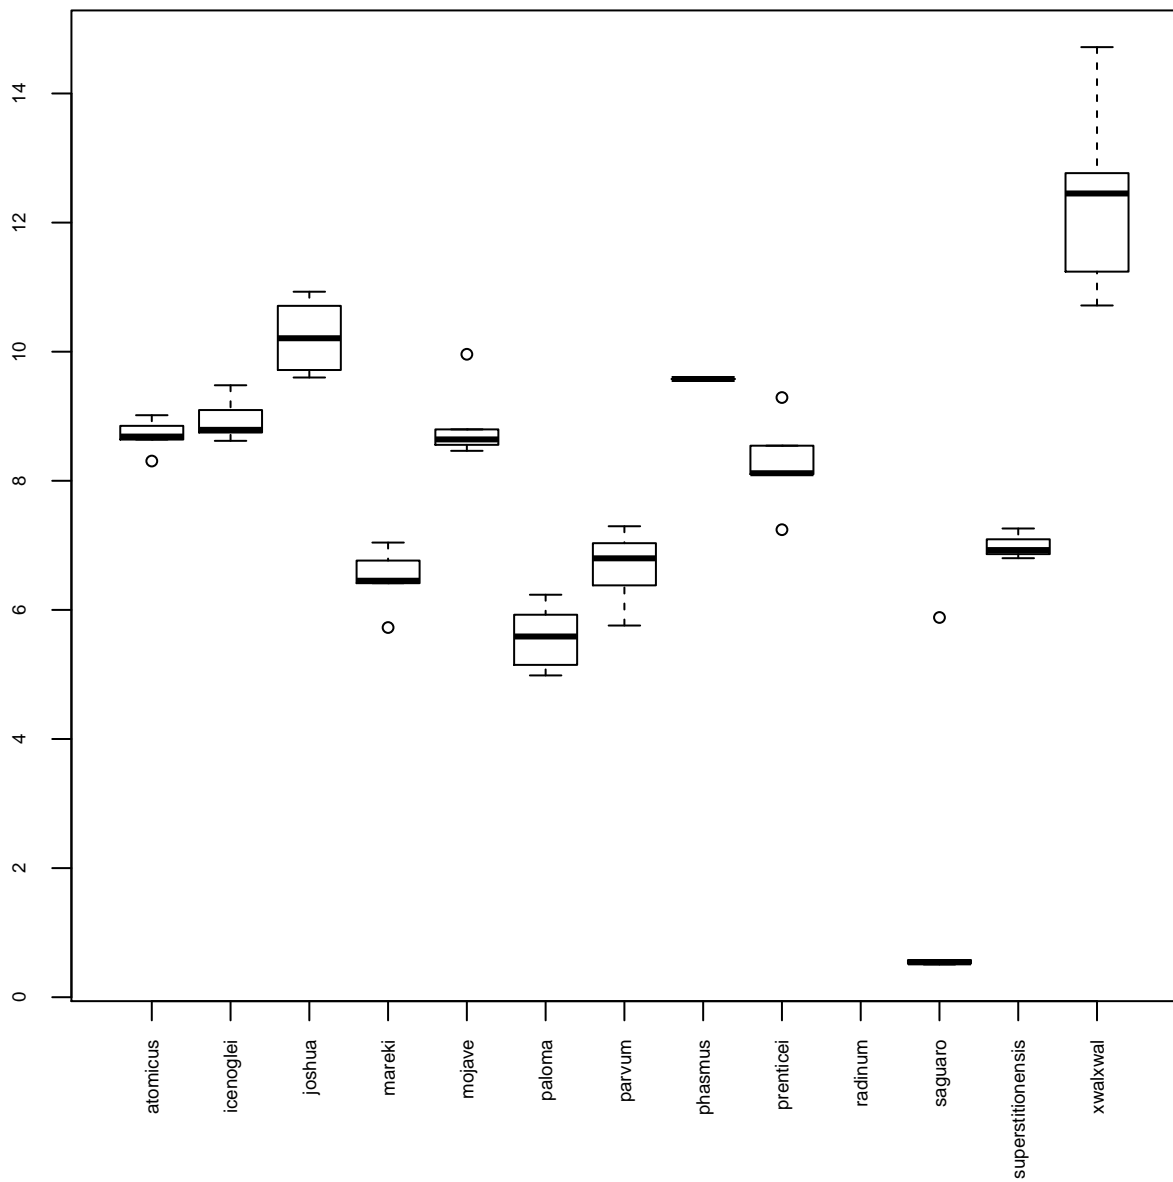

Supplement: Supplementary file 679

# Femur 3/Metatarsus 4 Length ratio – males

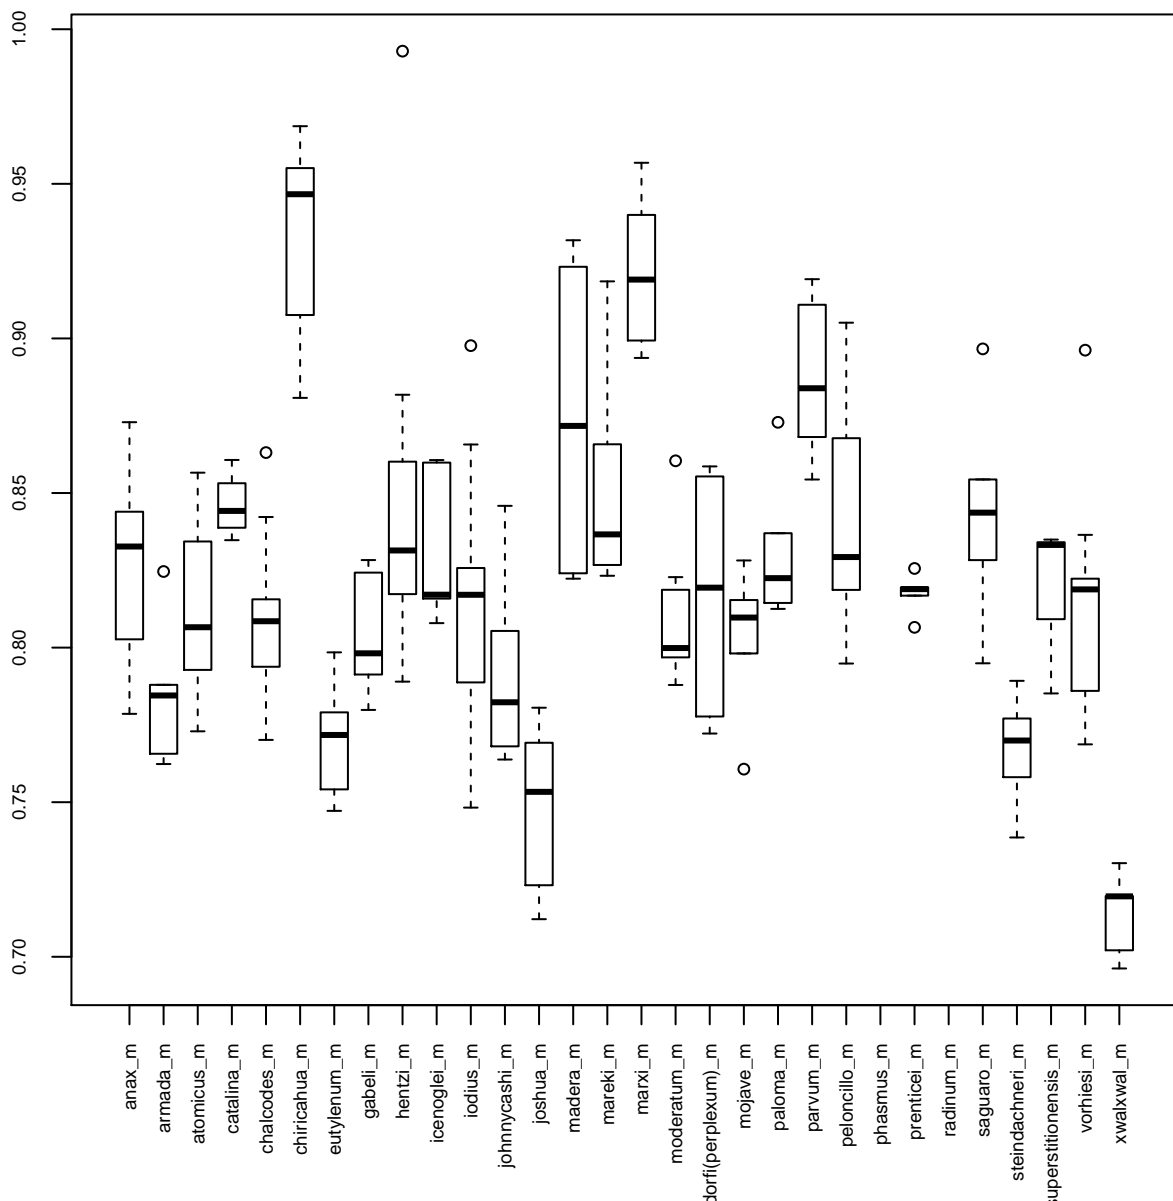

Supplement: Supplementary file 680

## Carapace Length/Metatarsus 3 ratio – males

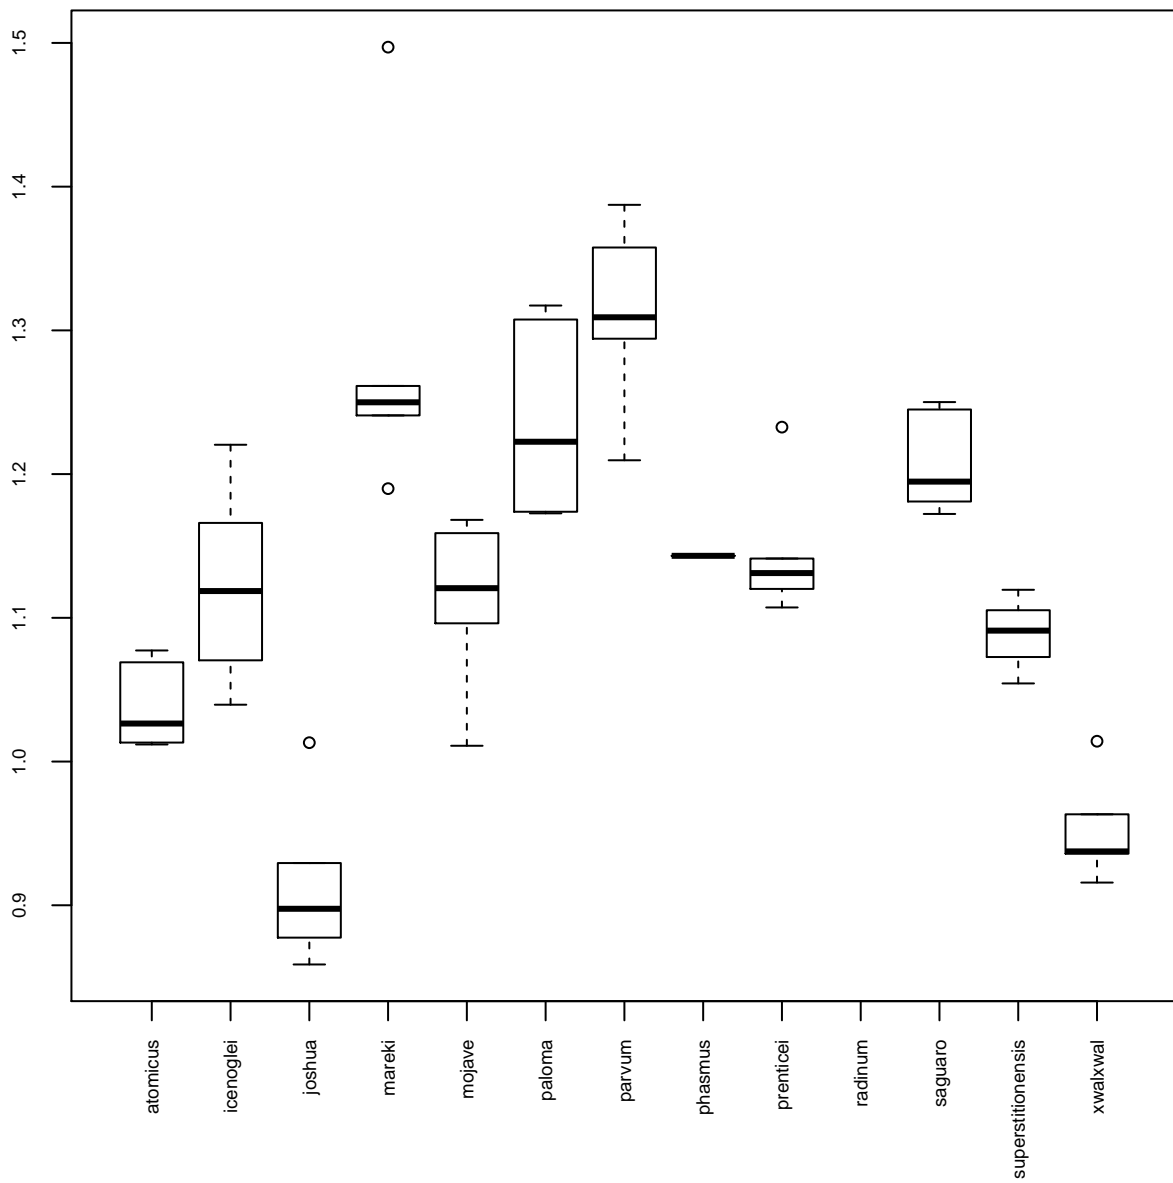

Supplement: Supplementary file 681

## Tibia 3/Tibia 4 ratio – females

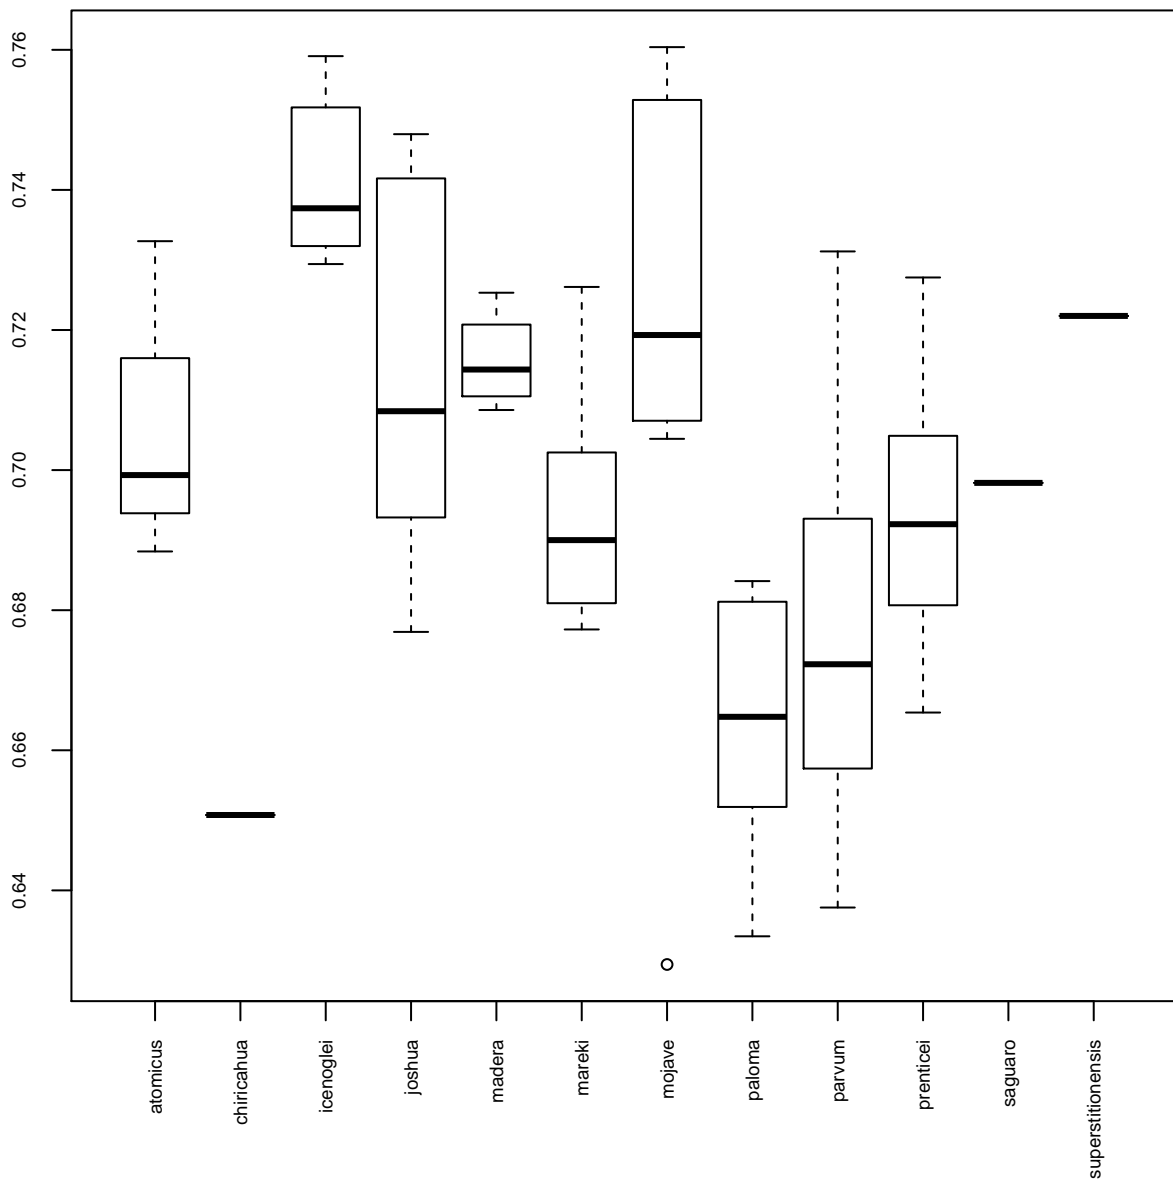

Supplement: Supplementary file 682

## Femur 1/Patella 3 ratio – females

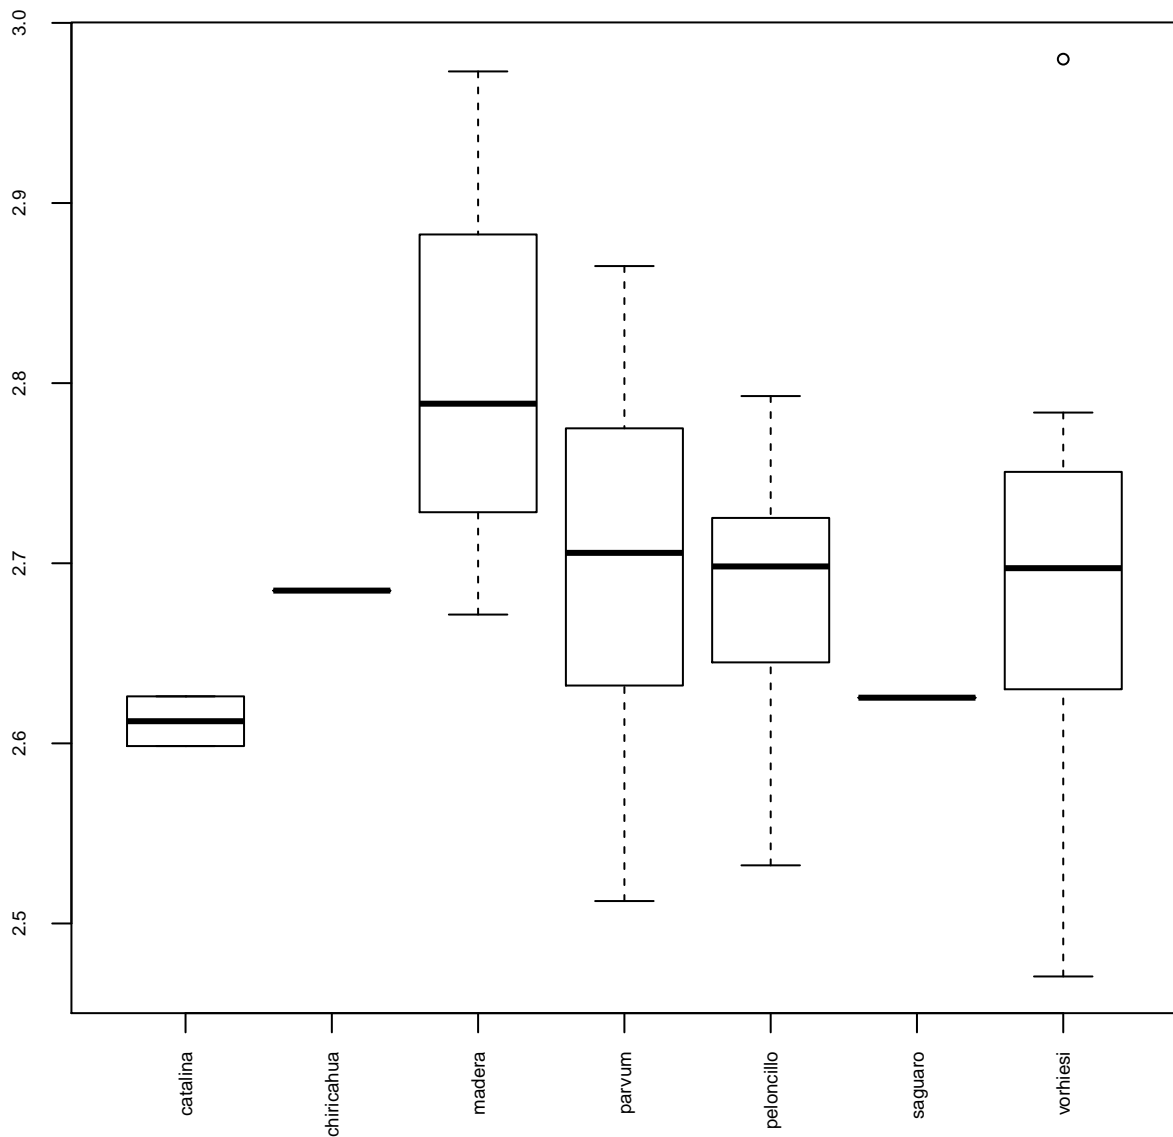

Supplement: Supplementary file 683

## Patella 1/Patella 4 ratio – females

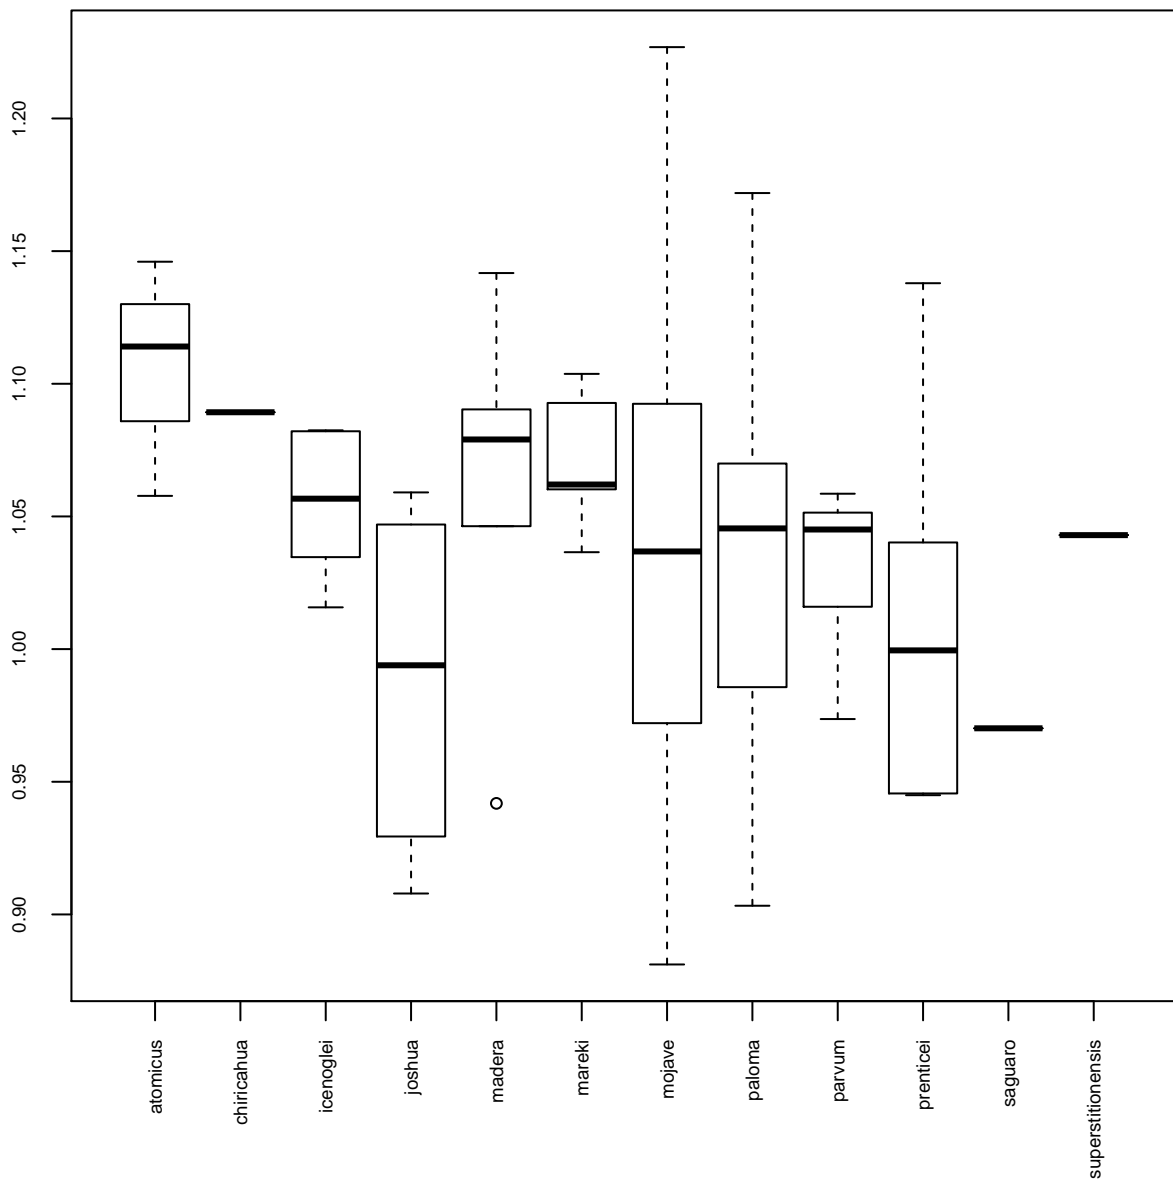

Supplement: Supplementary file 684

# Metatarsus 3/Patella 4 Length ratio – females

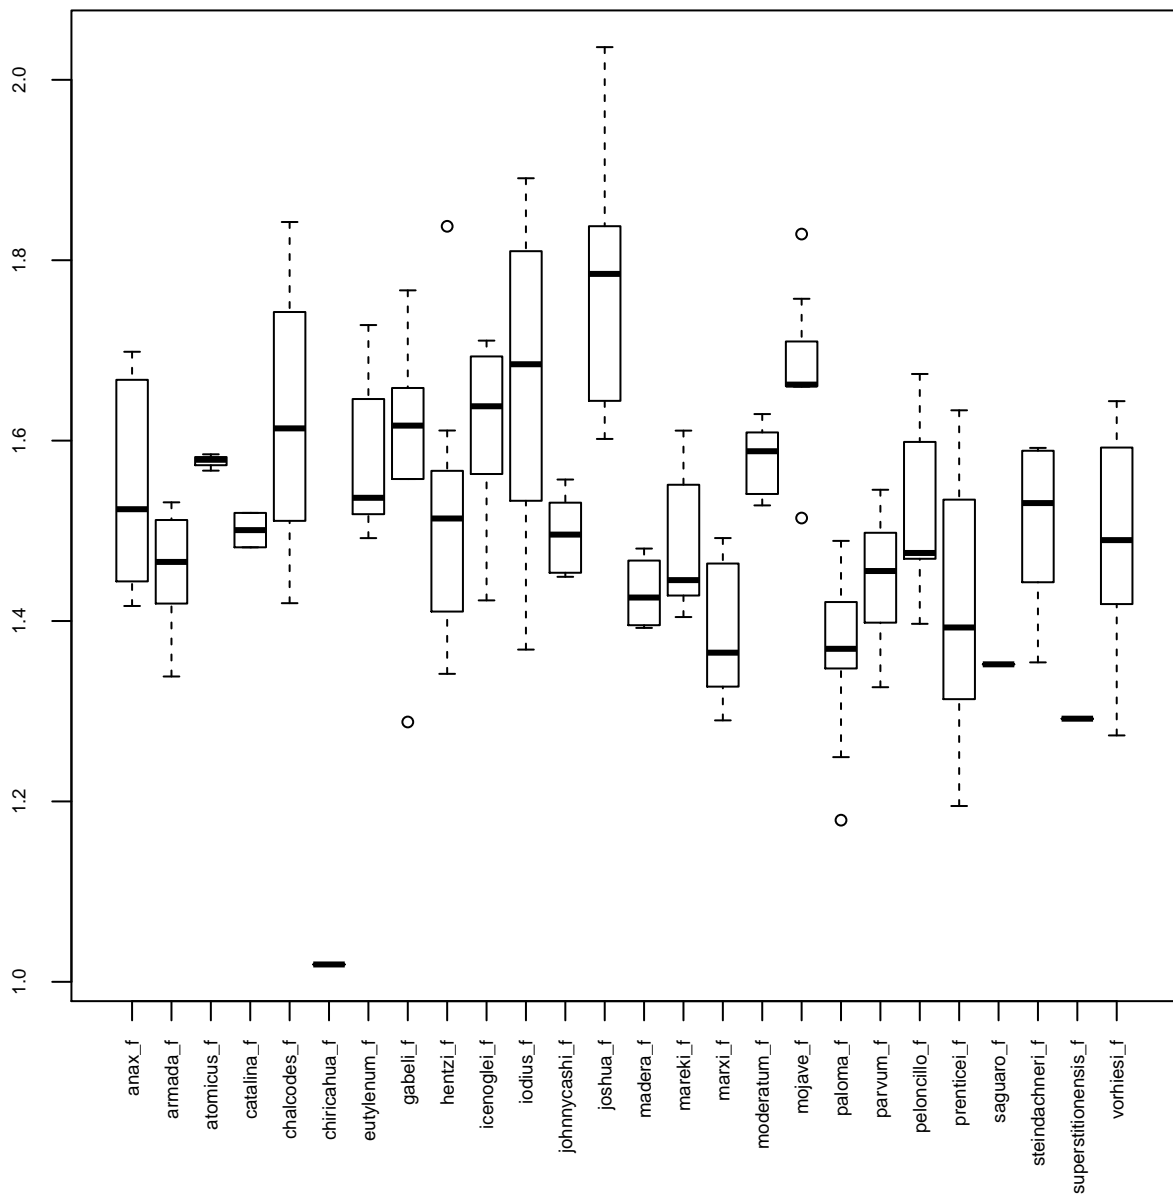

Supplement: Supplementary file 685

## Patella 1/Metatarsus 4 Length ratio – females

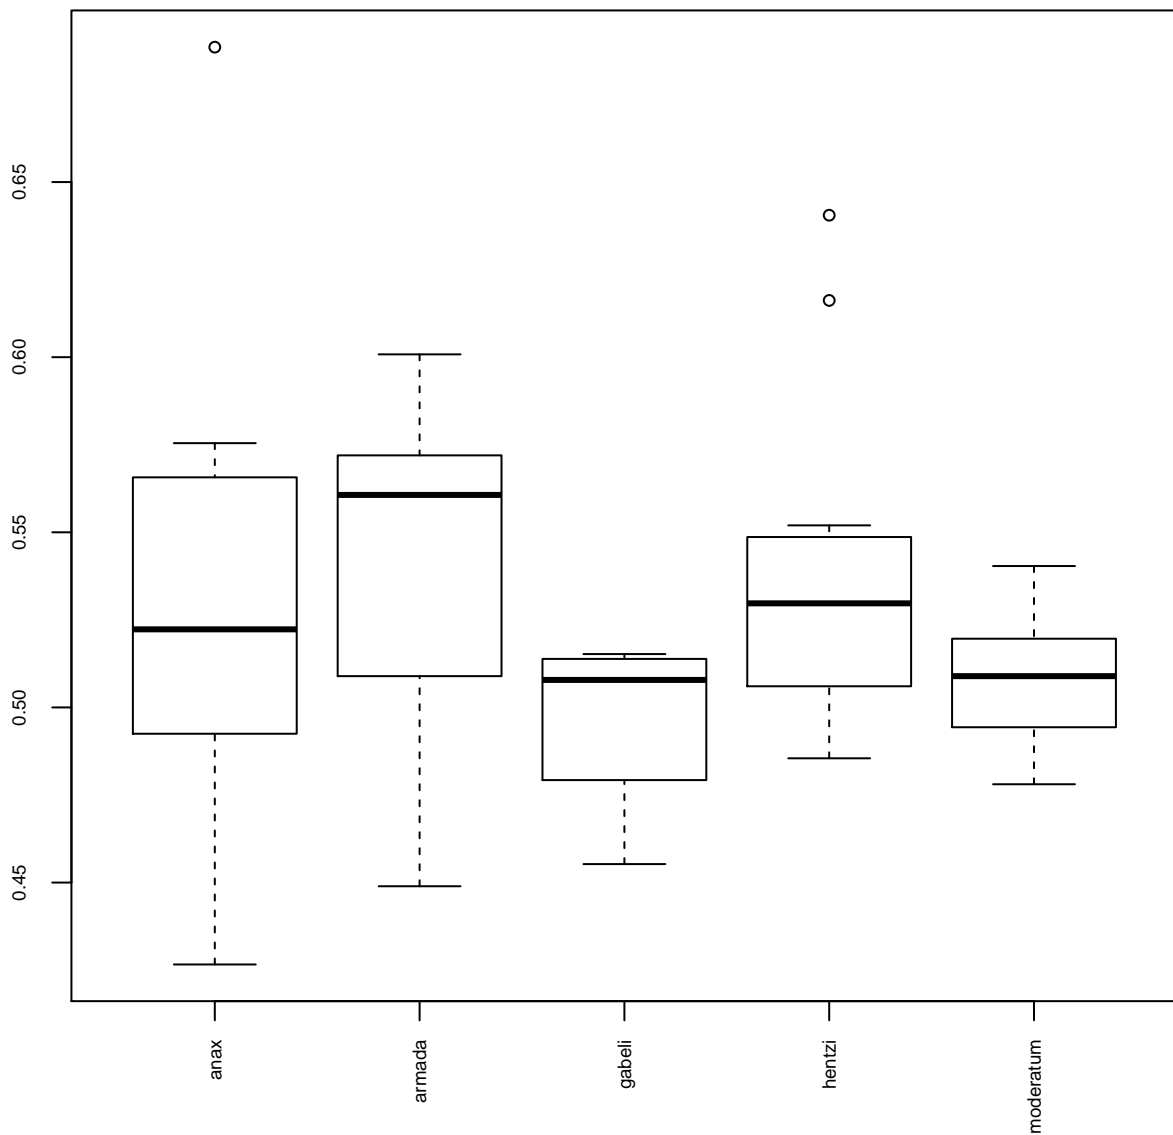

Supplement: Supplementary file 686

## Patella 4/Tarsus 4 ratio – females

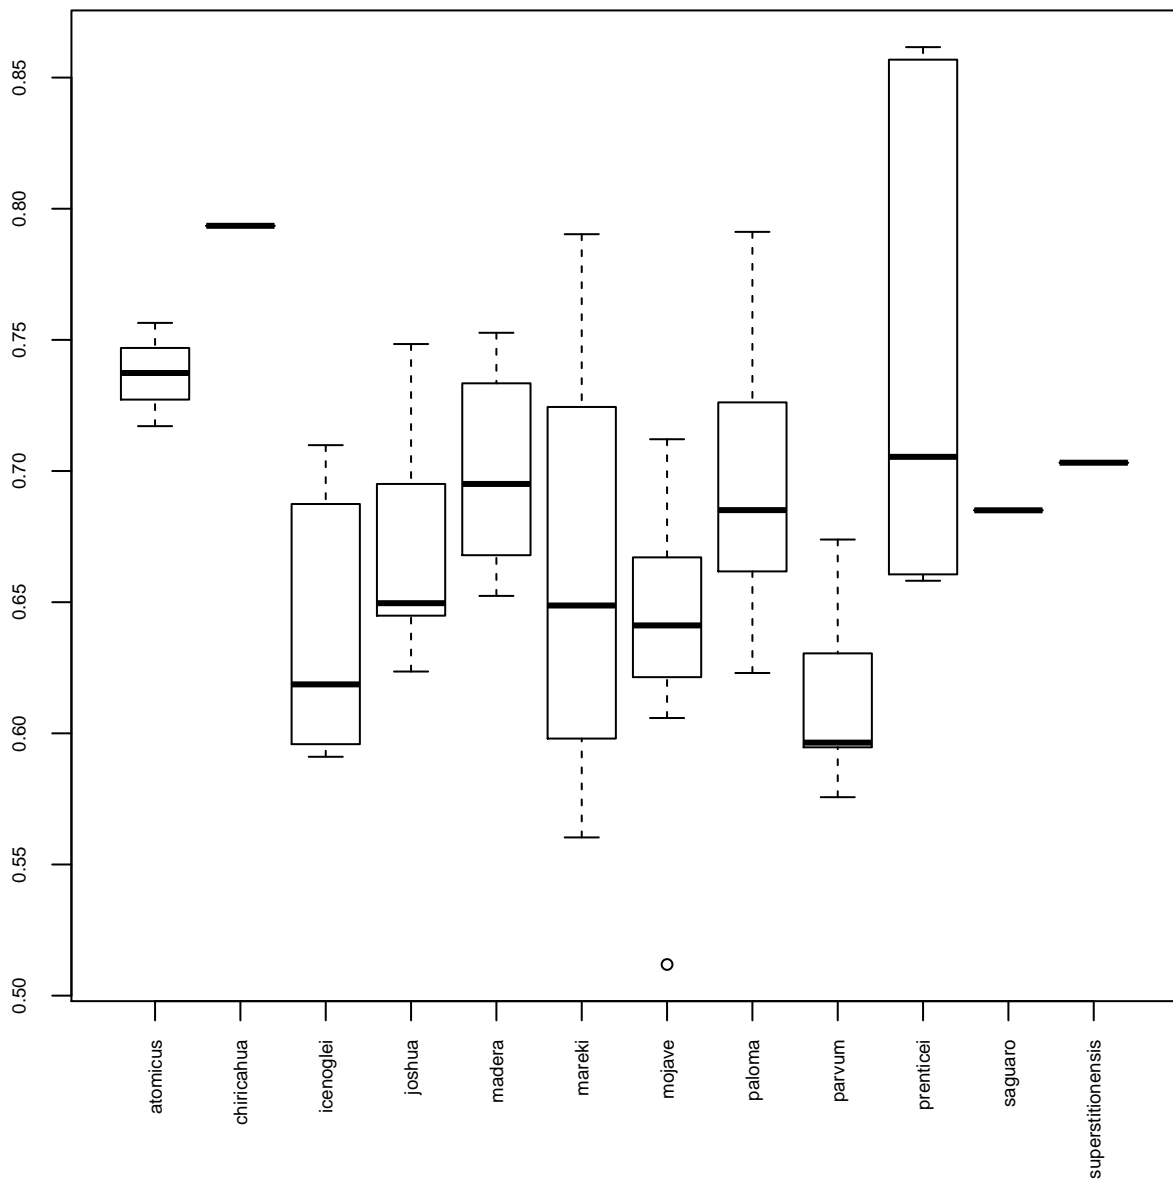

Supplement: Supplementary file 687

## Tibia 1/Tibia 4 ratio – females

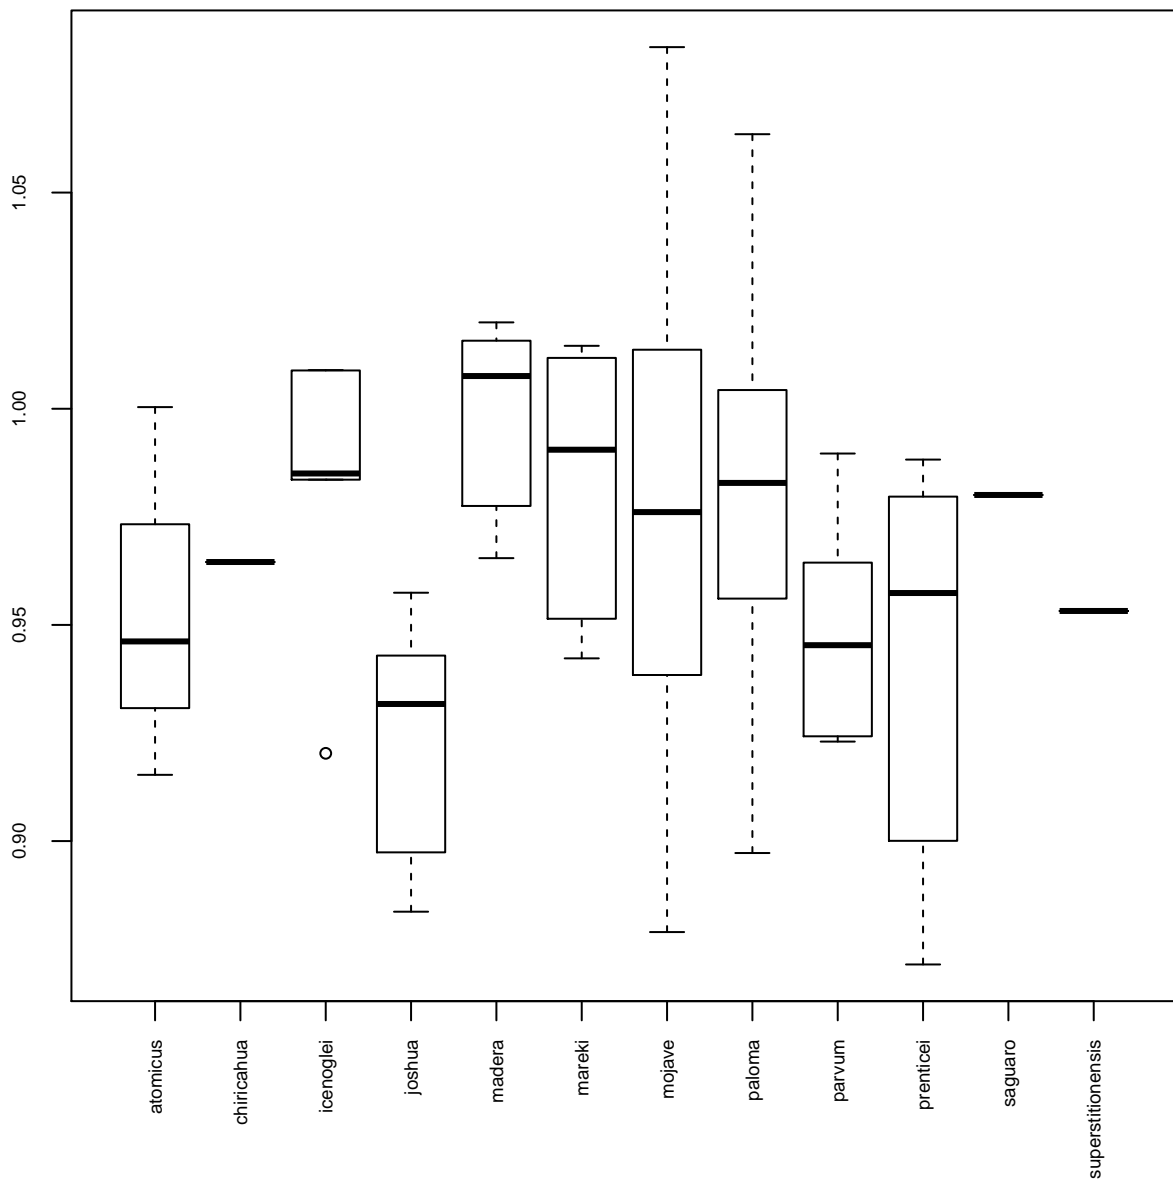

Supplement: Supplementary file 688

## Femur 1/Tibia 1 ratio – males

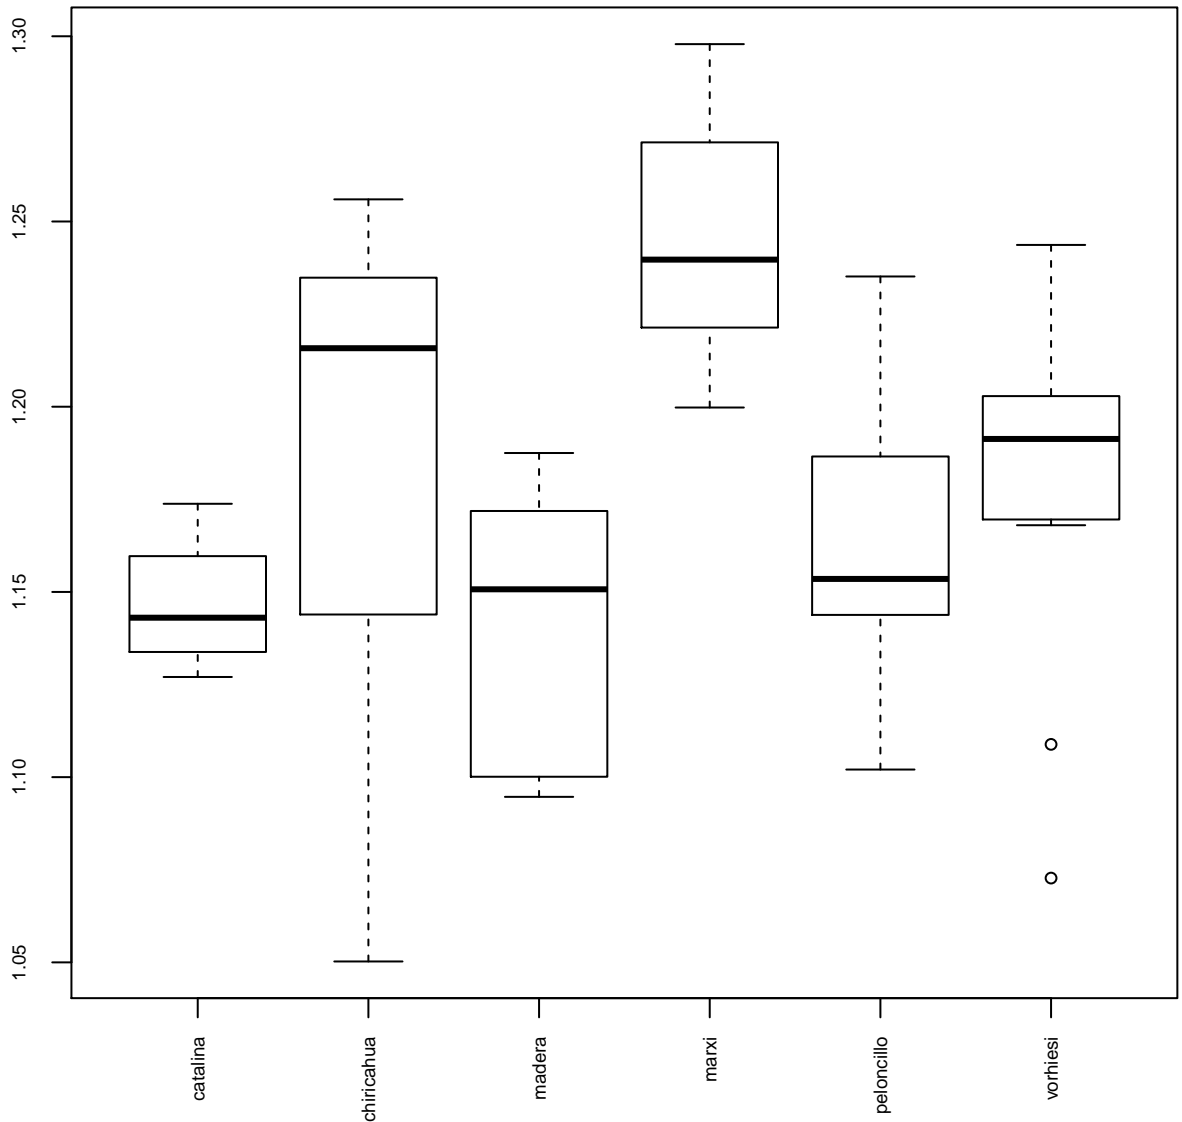

Supplement: Supplementary file 689

## Carapace Length/Tarsus 4 ratio – females

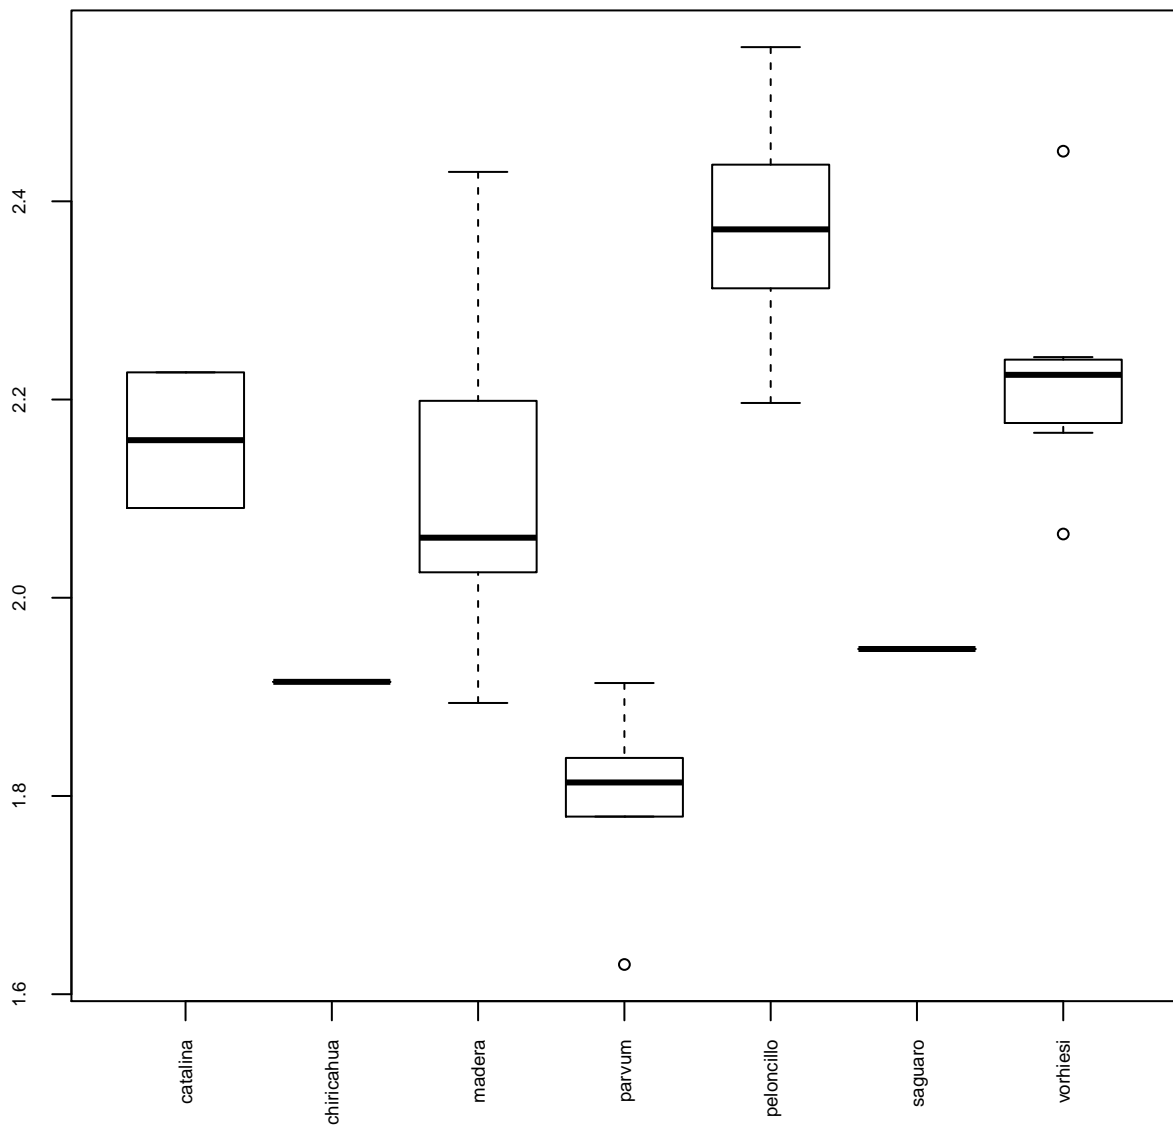

Supplement: Supplementary file 690

## Tibia 1/Tibia 3 ratio – females

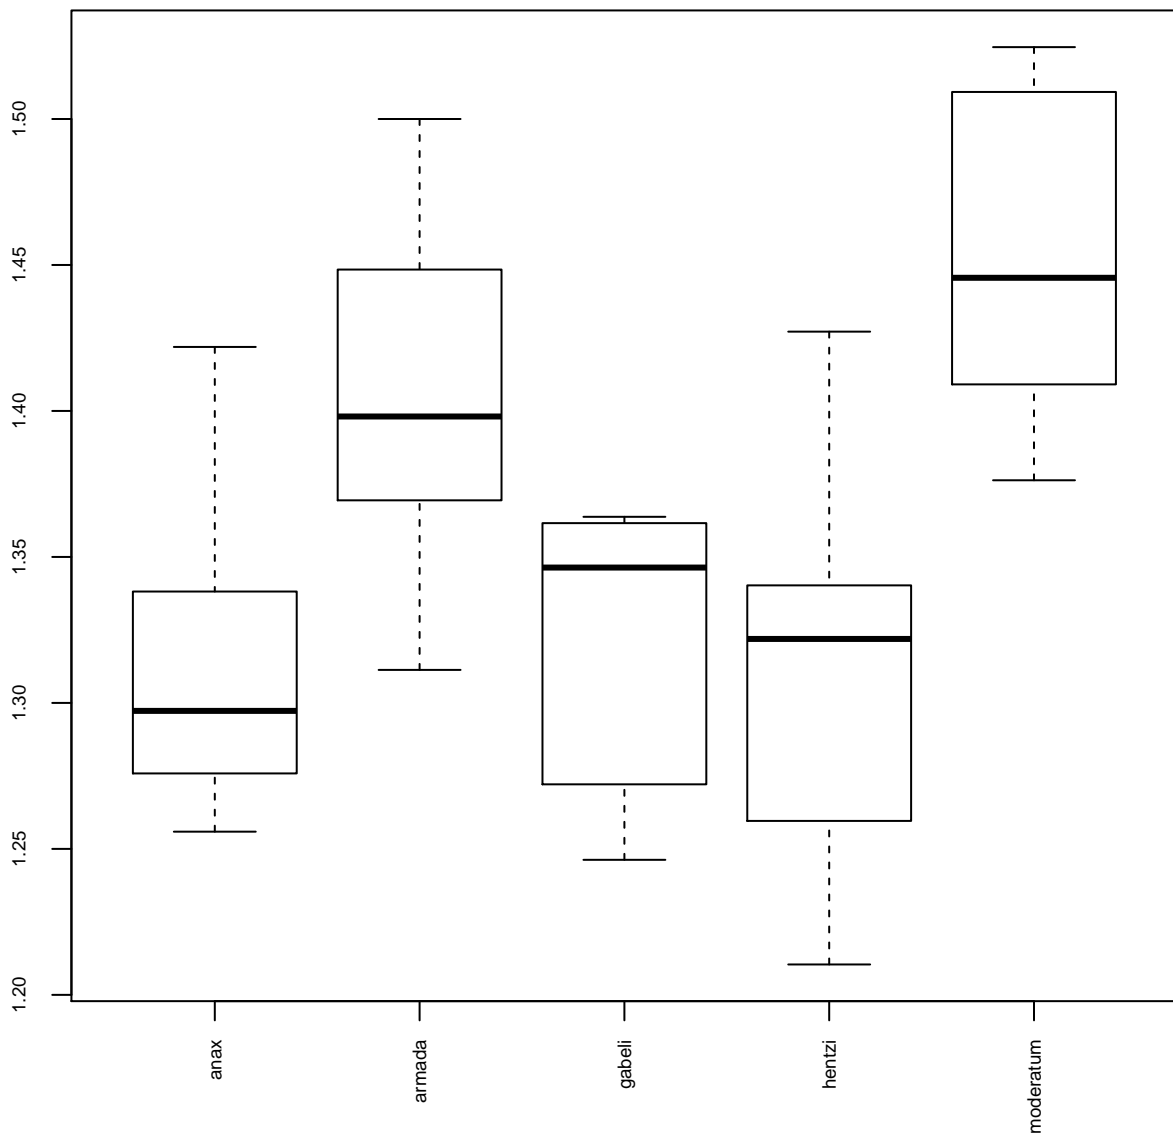

Supplement: Supplementary file 691

## Femur 3/Patella 4 Length ratio – males

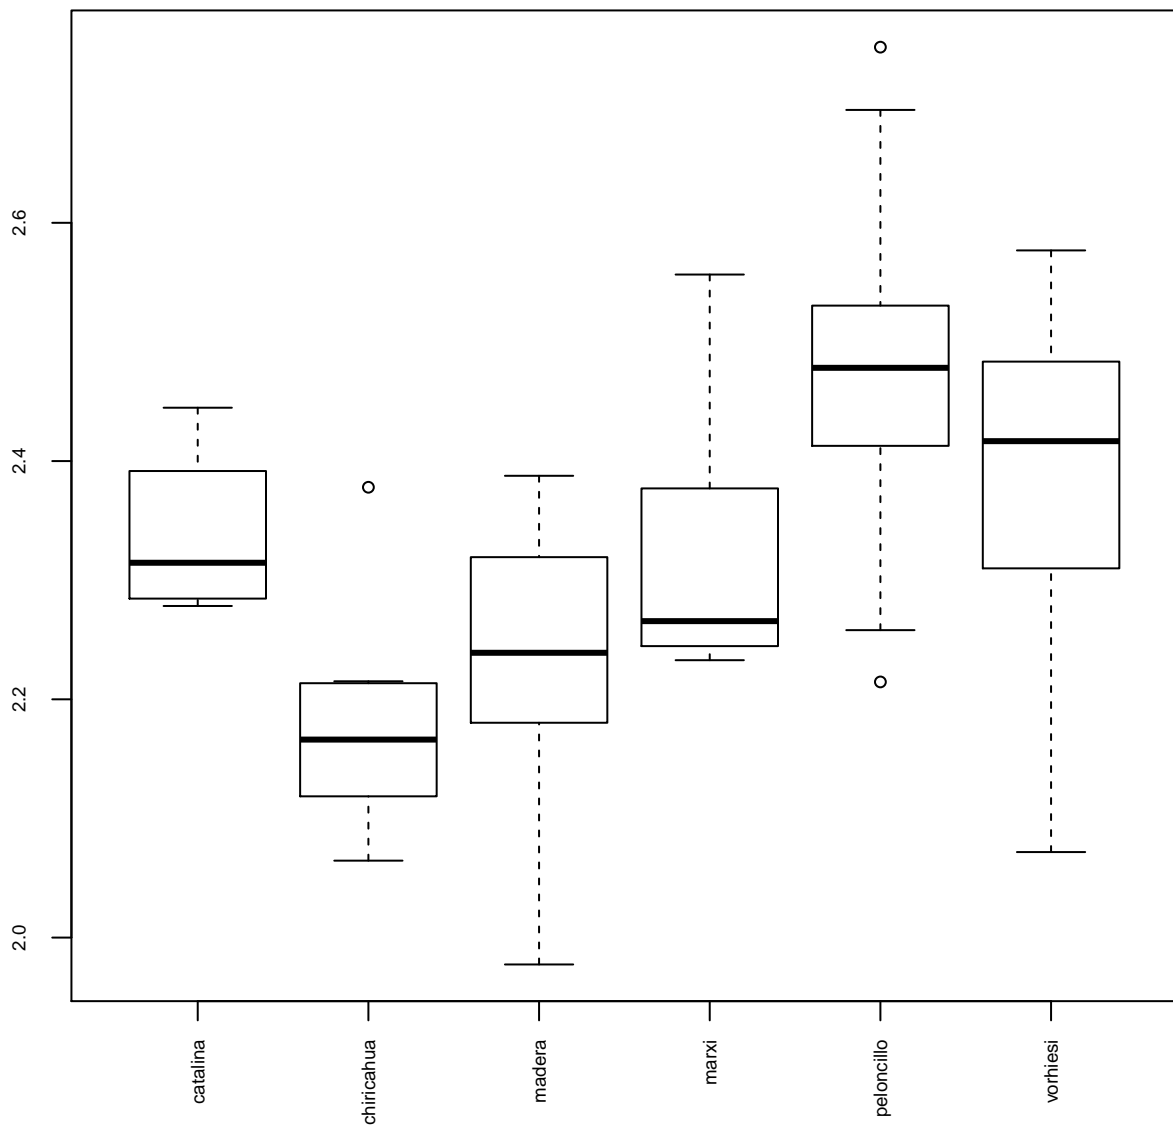

Supplement: Supplementary file 692

## Tarsus 1/Femur 3 Length ratio – females

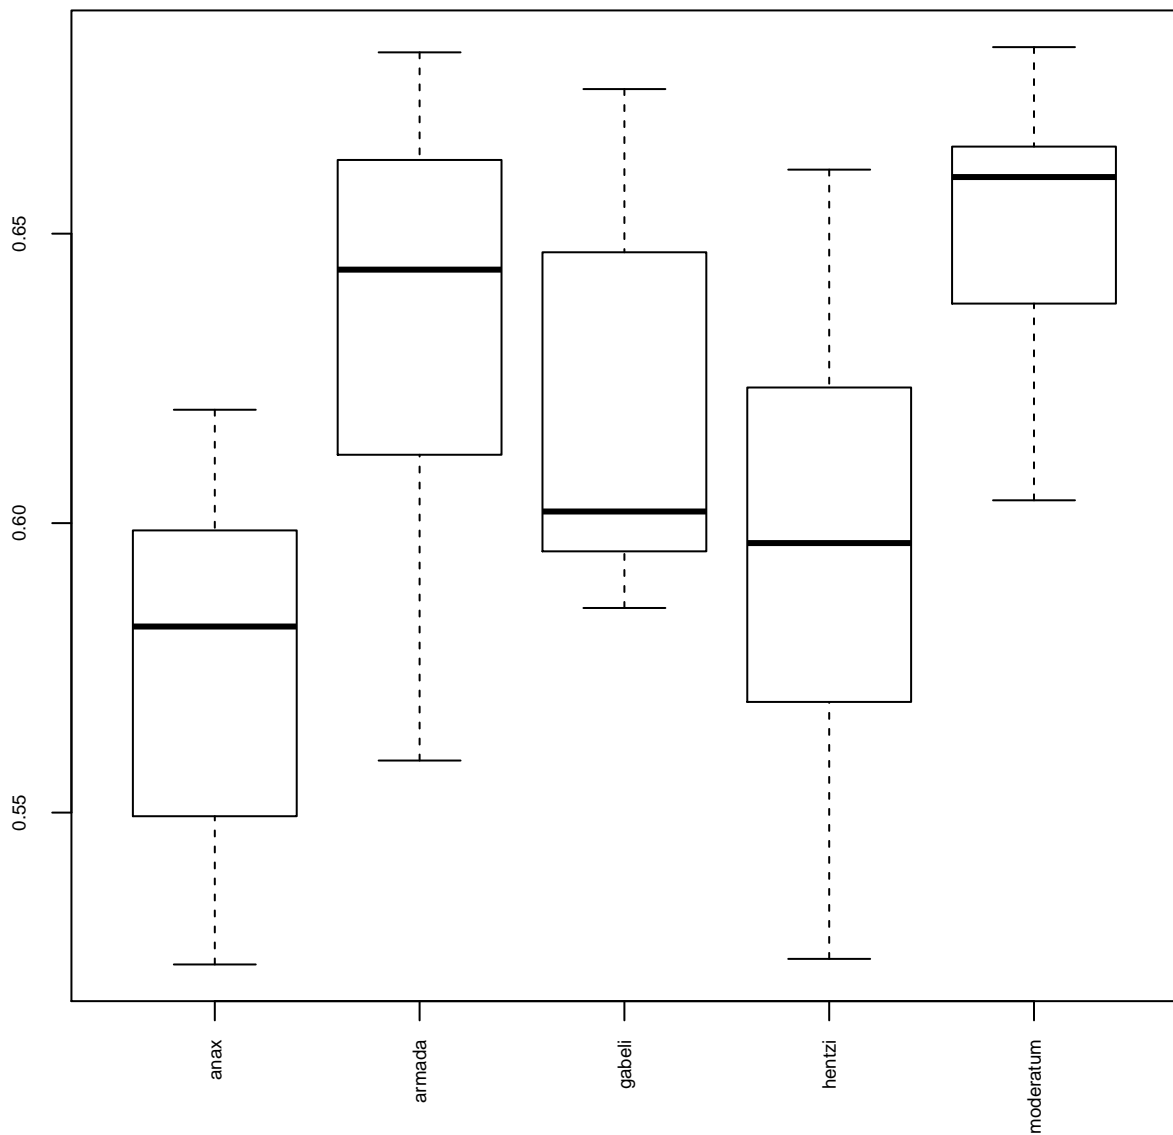

Supplement: Supplementary file 693

# Patella 1/Tibia 4 Length ratio – females

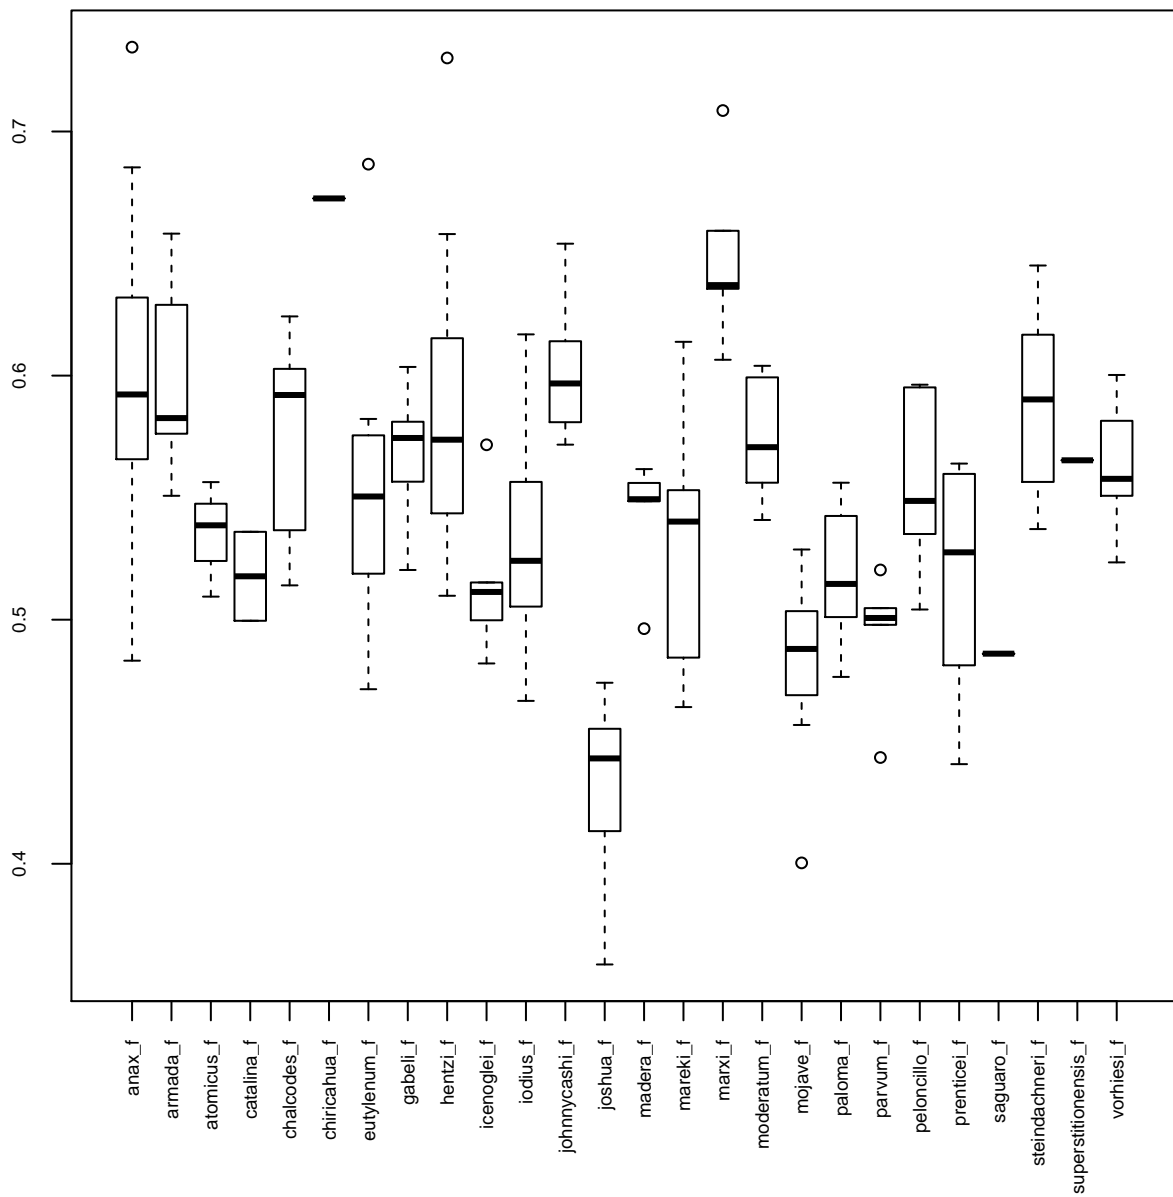

Supplement: Supplementary file 694

## Carapace Length/Tarsus 1 ratio – females

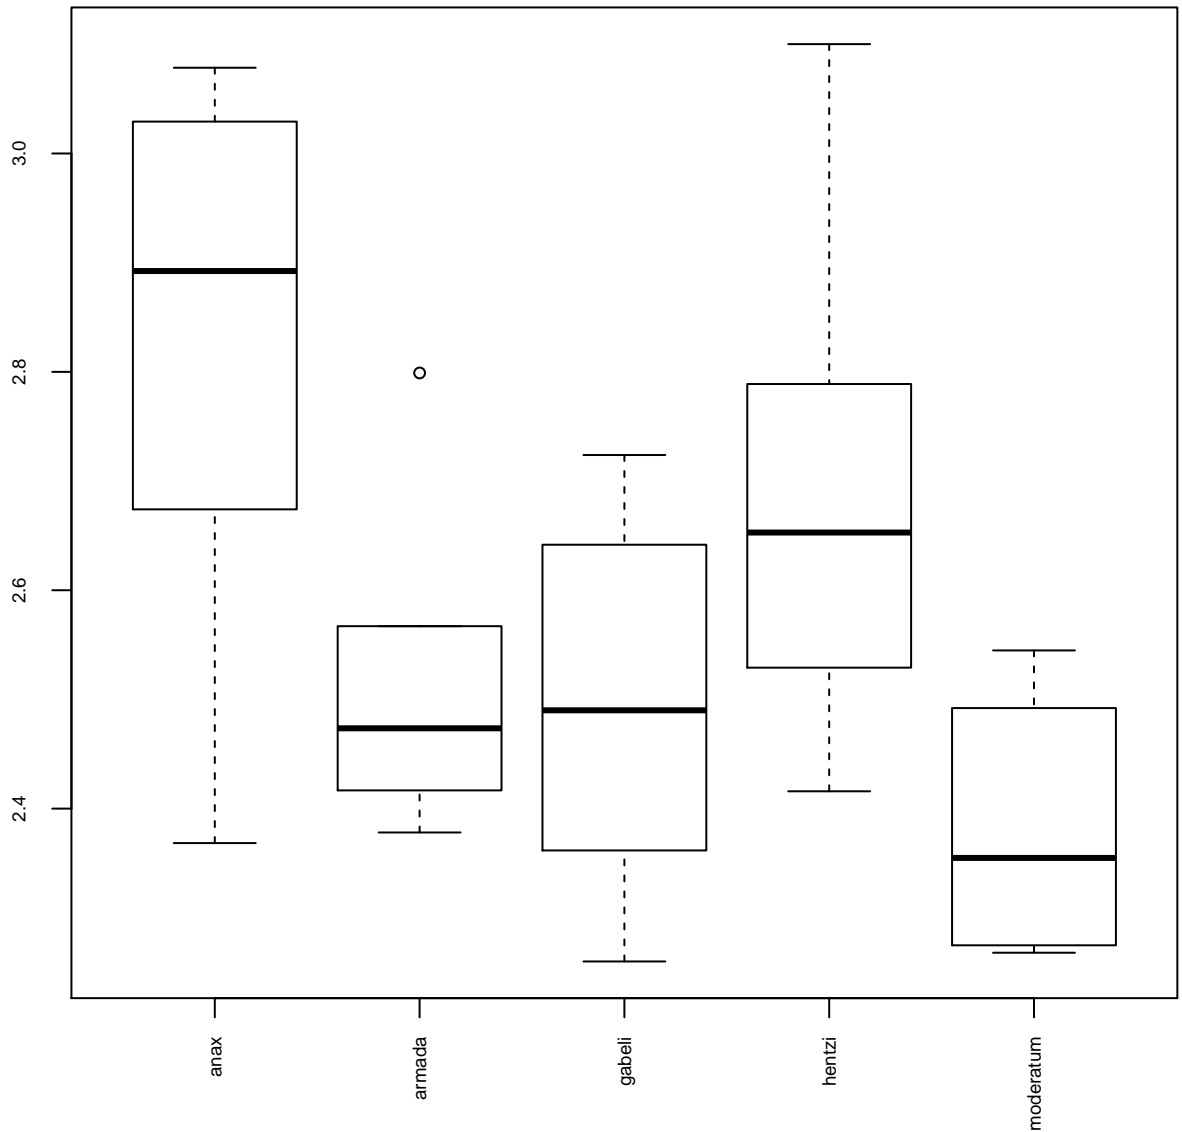

Supplement: Supplementary file 695

# Palpal Tibia/Metatarsus 3 Length ratio – males

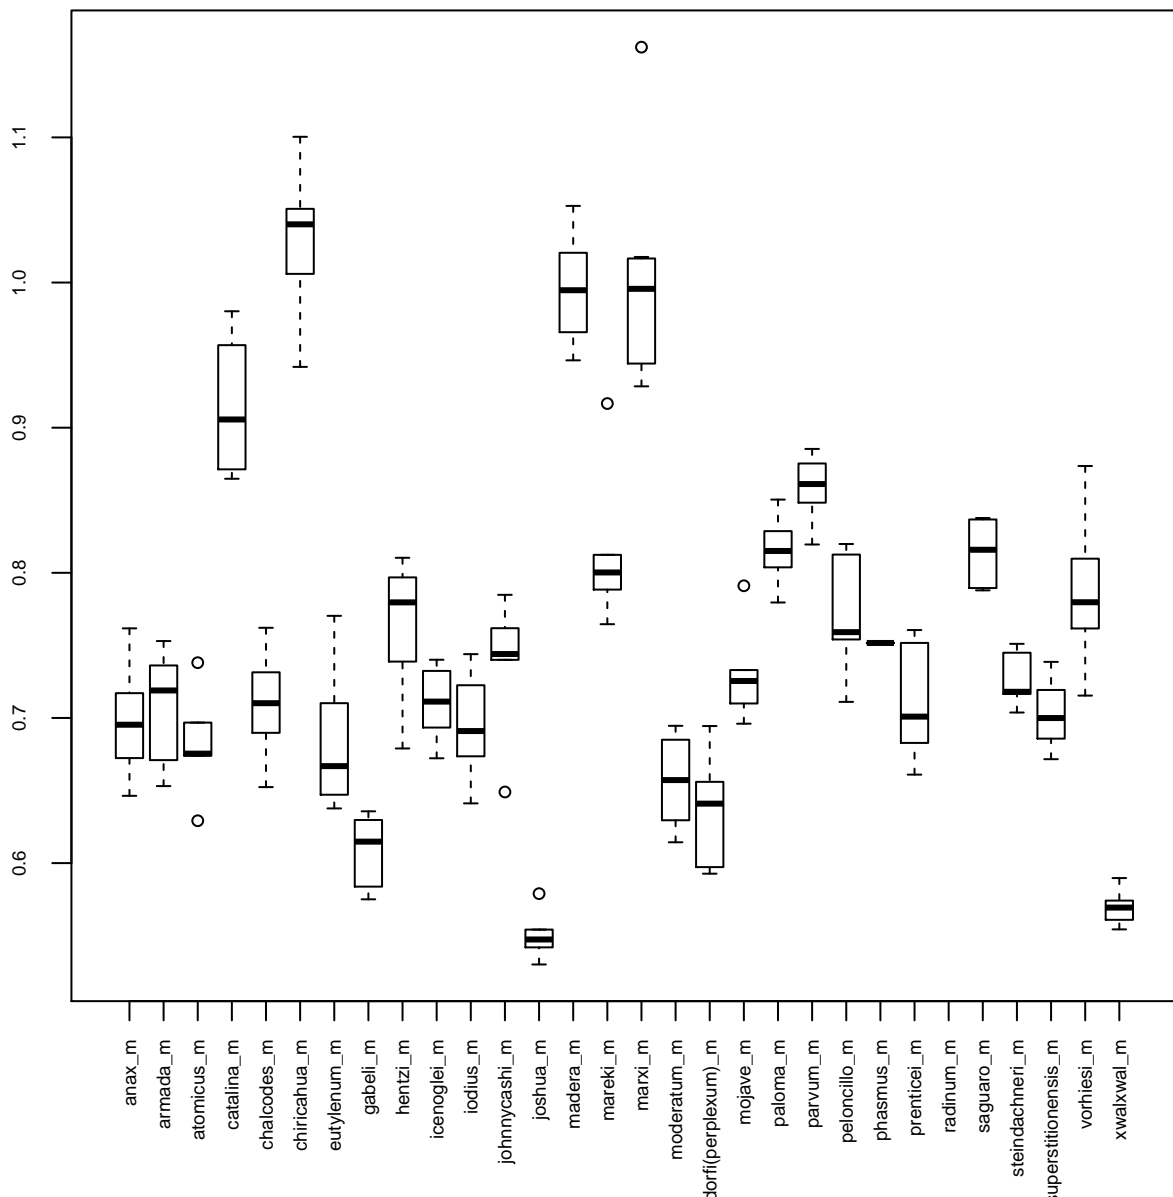

Supplement: Supplementary file 696

Palpal Tibia/Tarsus 1 Length ratio – males

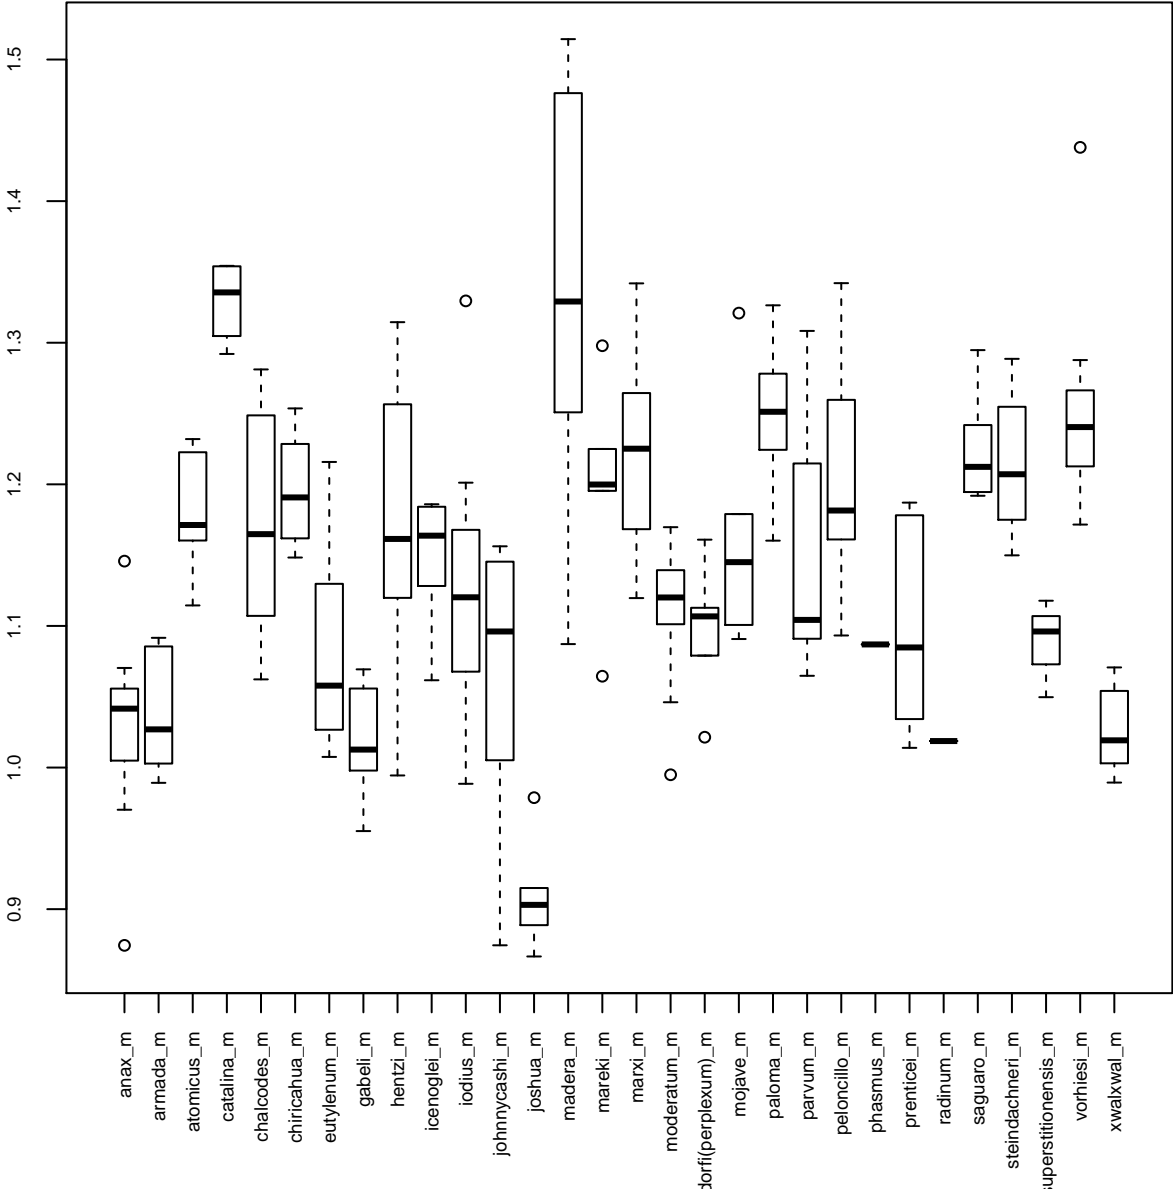

Supplement: Supplementary file 697

# Tibia 3/Metatarsus 4 Length ratio – males

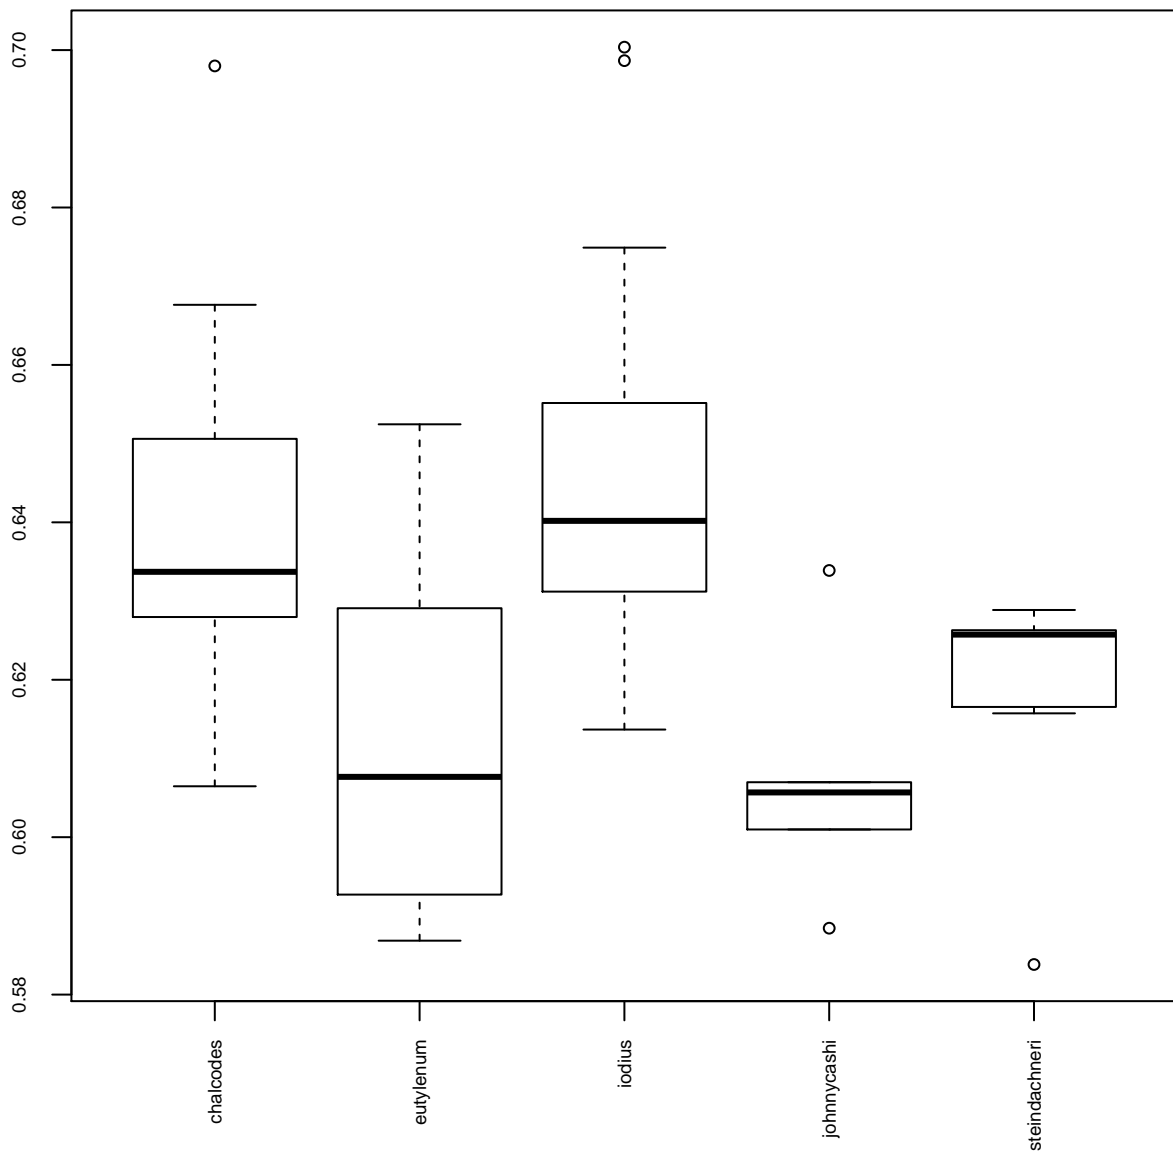

Supplement: Supplementary file 698

## Tarsus 1/Tibia 4 Length ratio – males

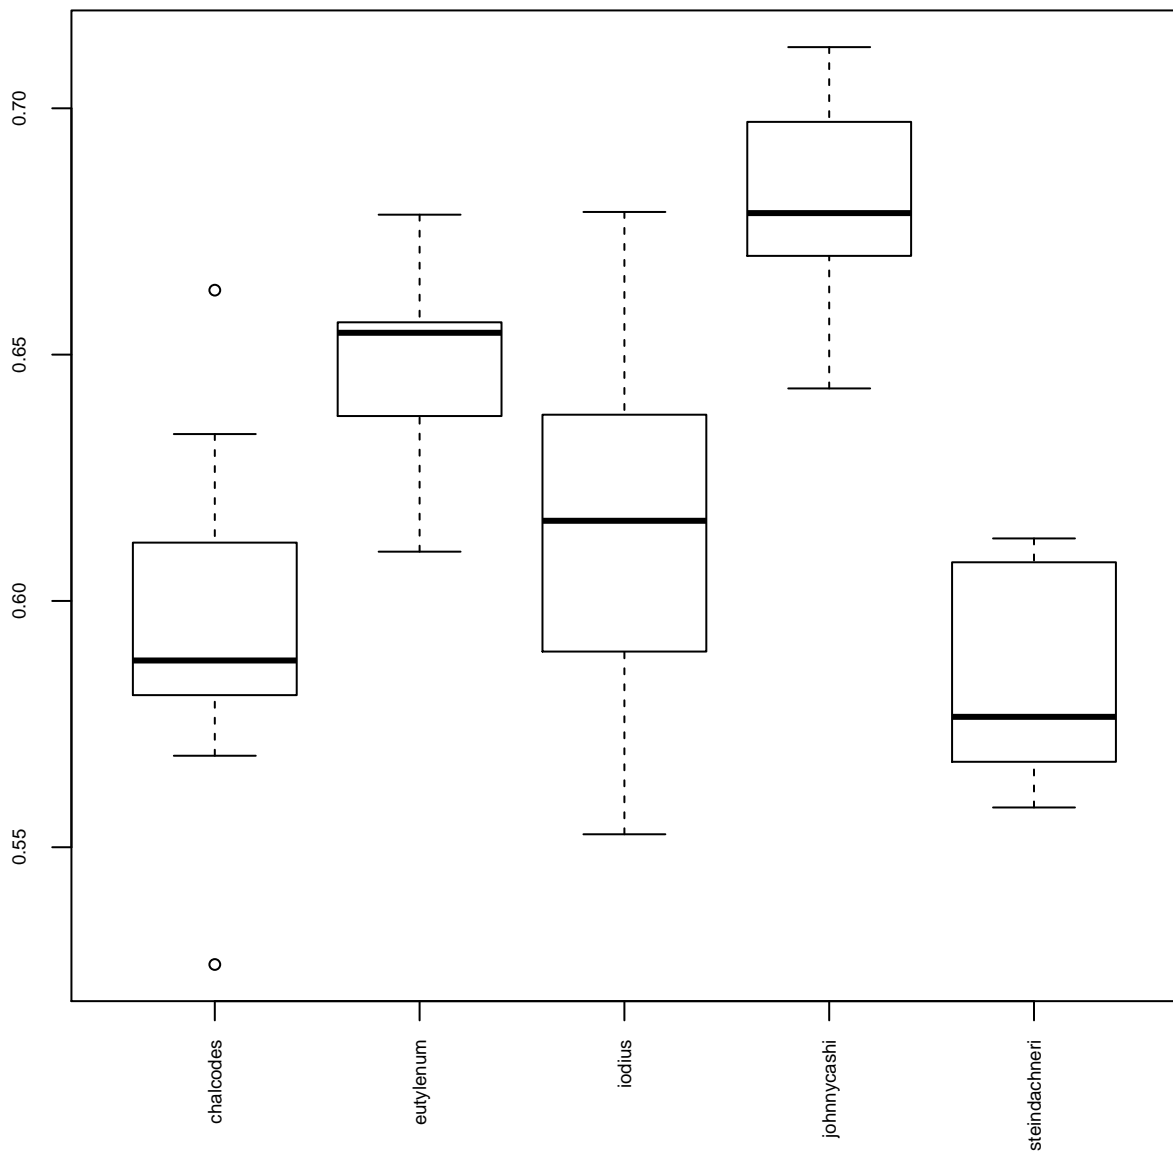

Supplement: Supplementary file 699

## Femur 1 Length/Width ratio – males

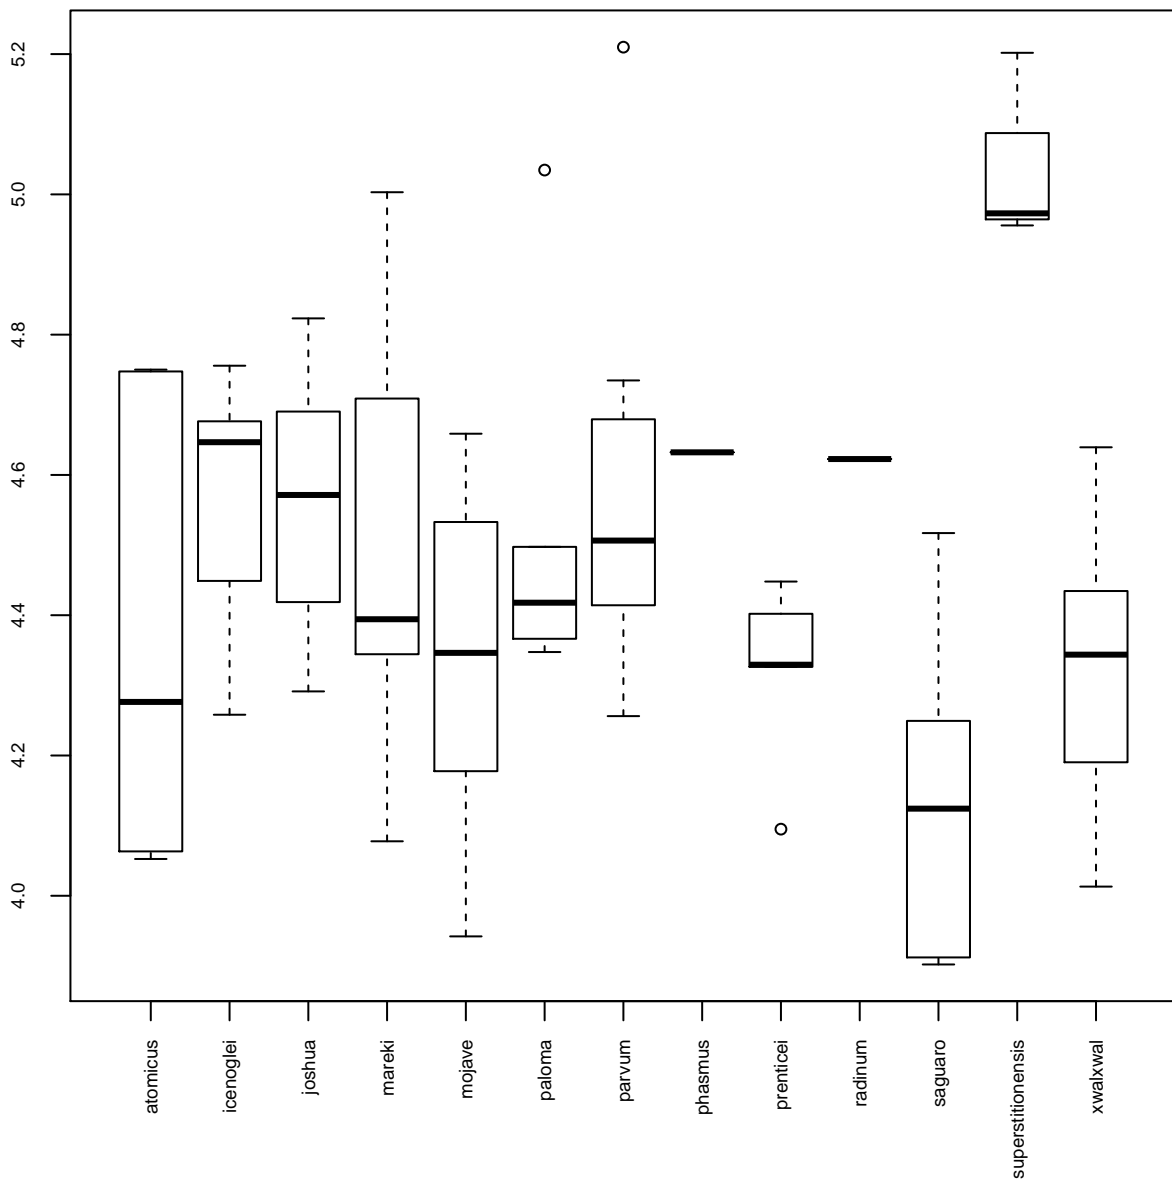

Supplement: Supplementary file 700
