# Supplementary material (part 8 of 15)
Source: publisher site journal article supplement (http://zookeys.pensoft.net/article/6264/download/suppl/32/)

Carapace Length/Patella 1 ratio – females

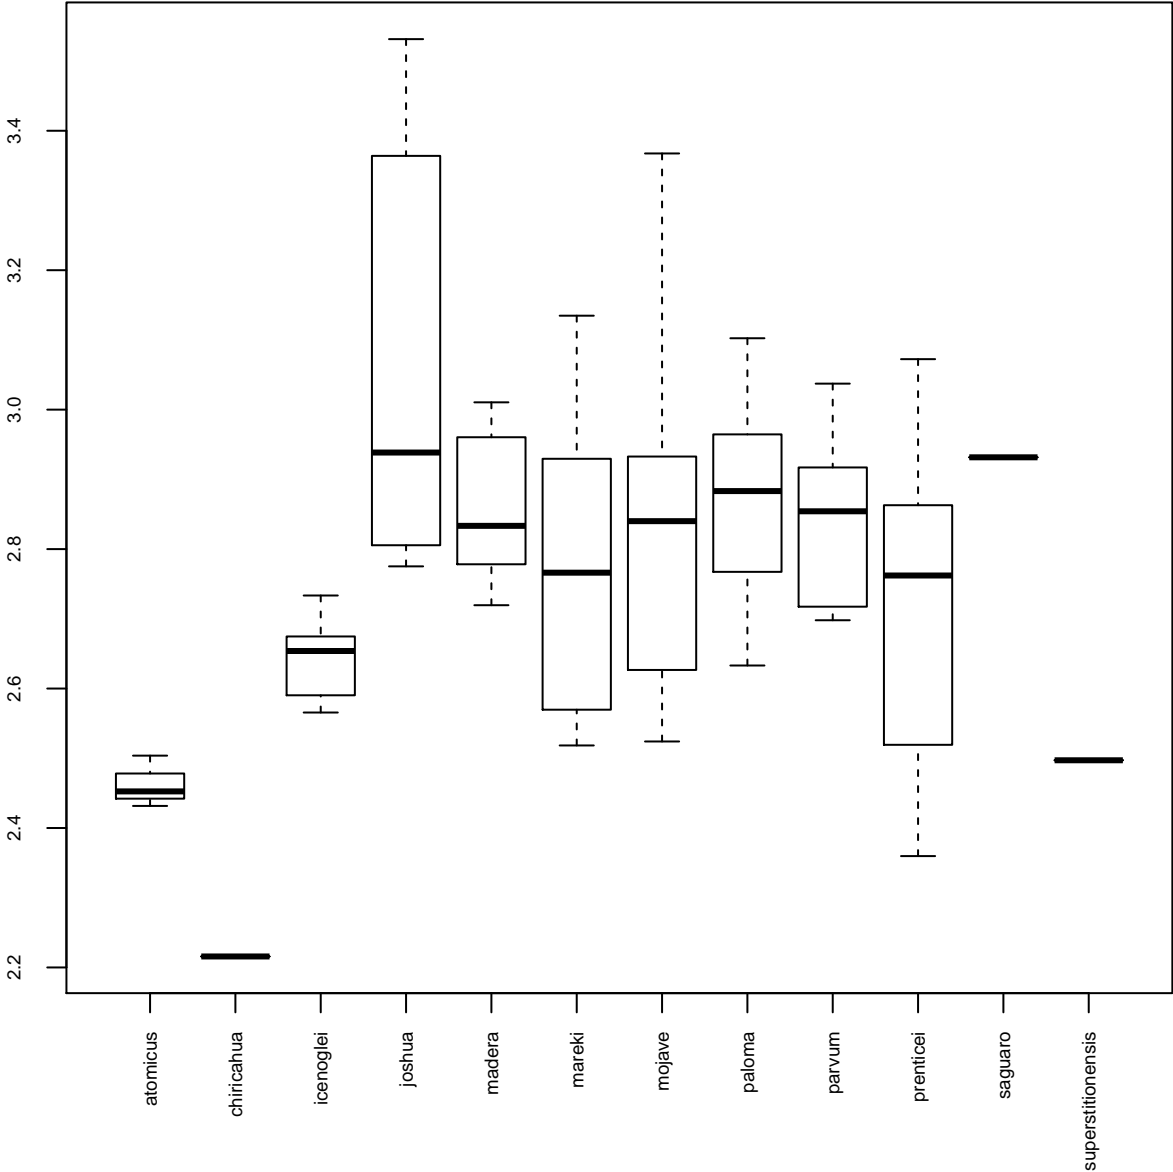

Supplement: Supplementary file 701

# Femur 1/Tibia 3 ratio – males

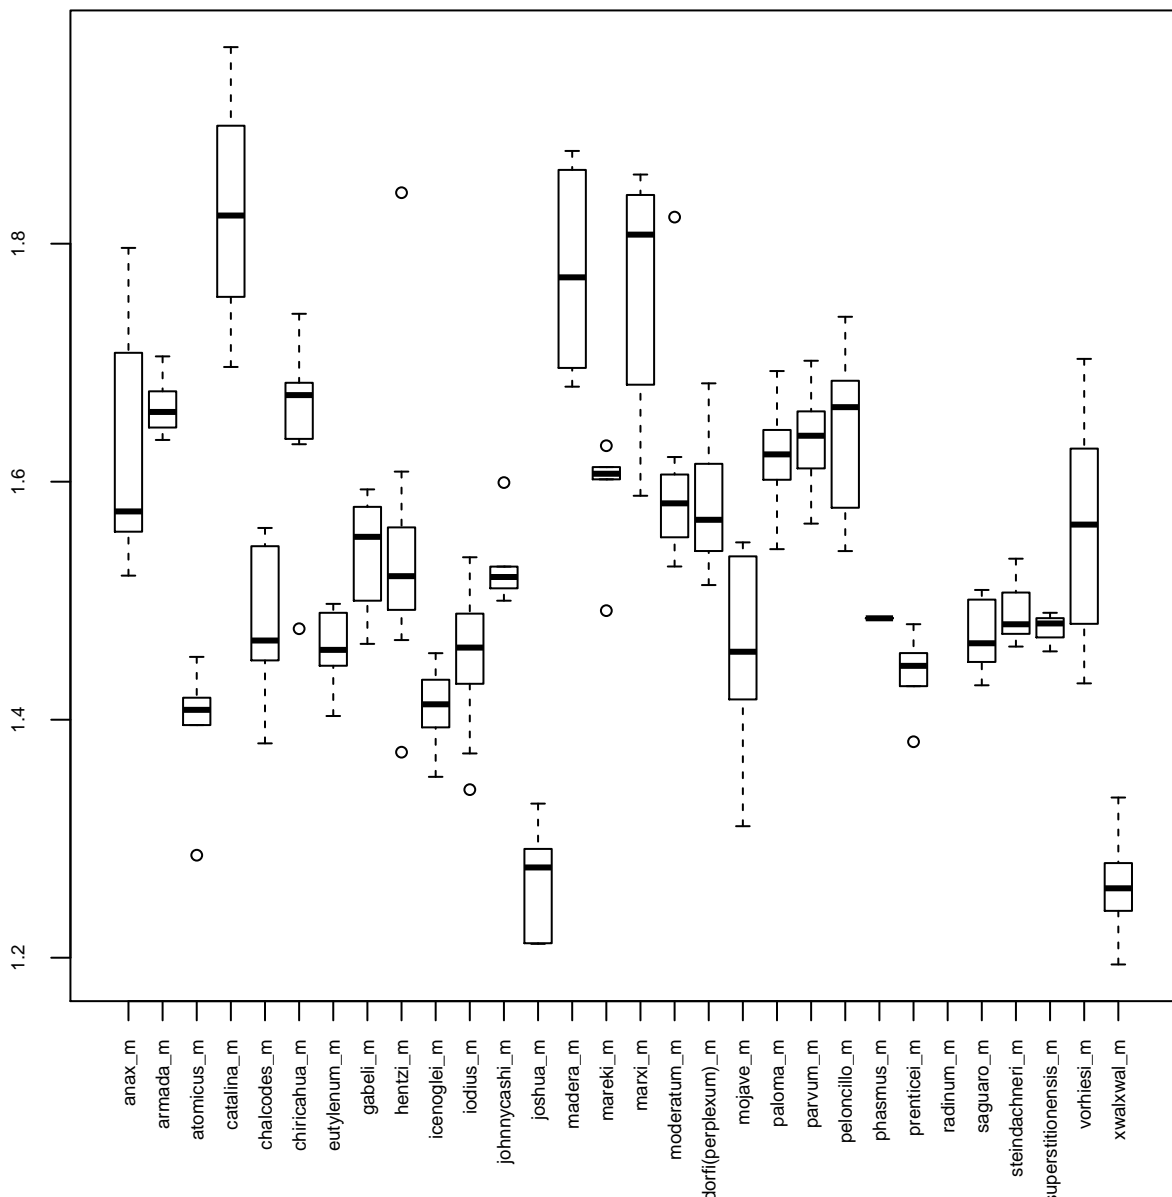

Supplement: Supplementary file 702

## Patella 4/Metatarsus 4 ratio – females

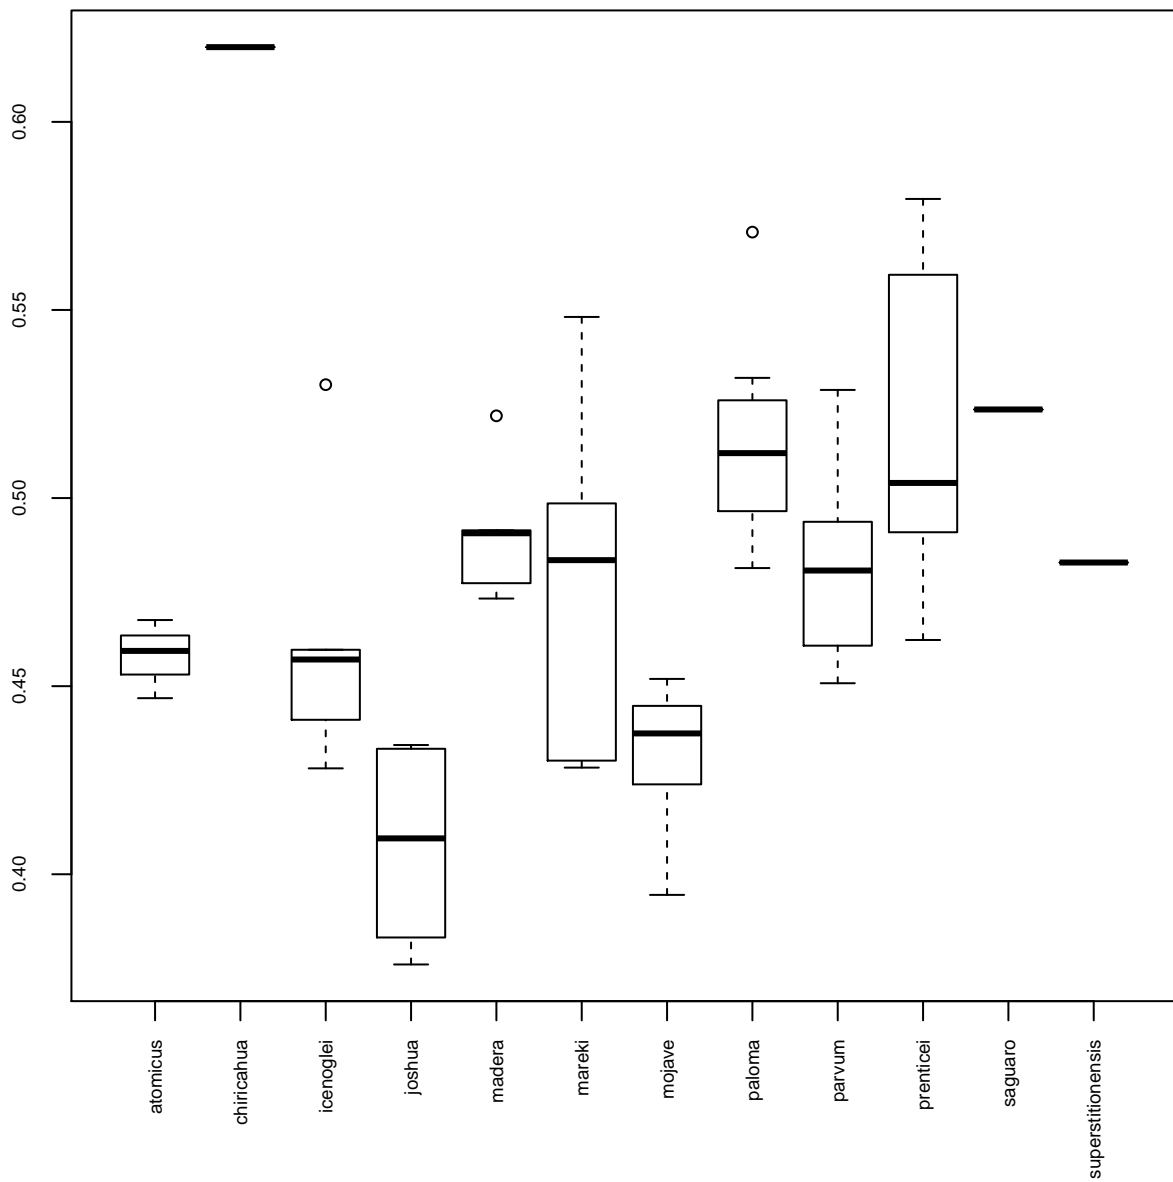

Supplement: Supplementary file 703

## Femur 3/Patella 4 Length ratio – females

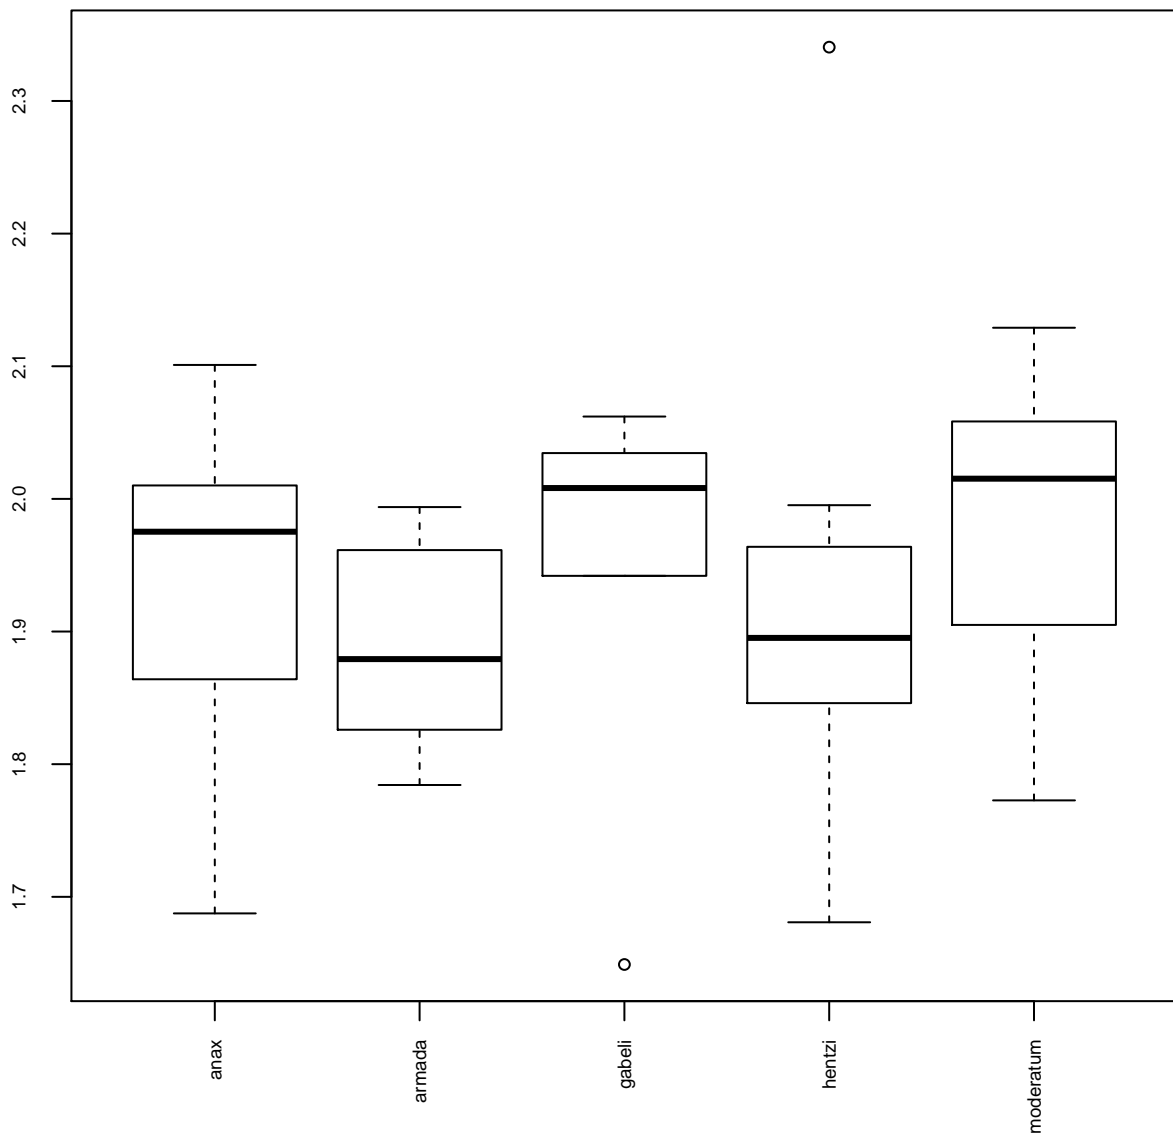

Supplement: Supplementary file 704

## Tarsus 1/Tarsus 4 ratio – males

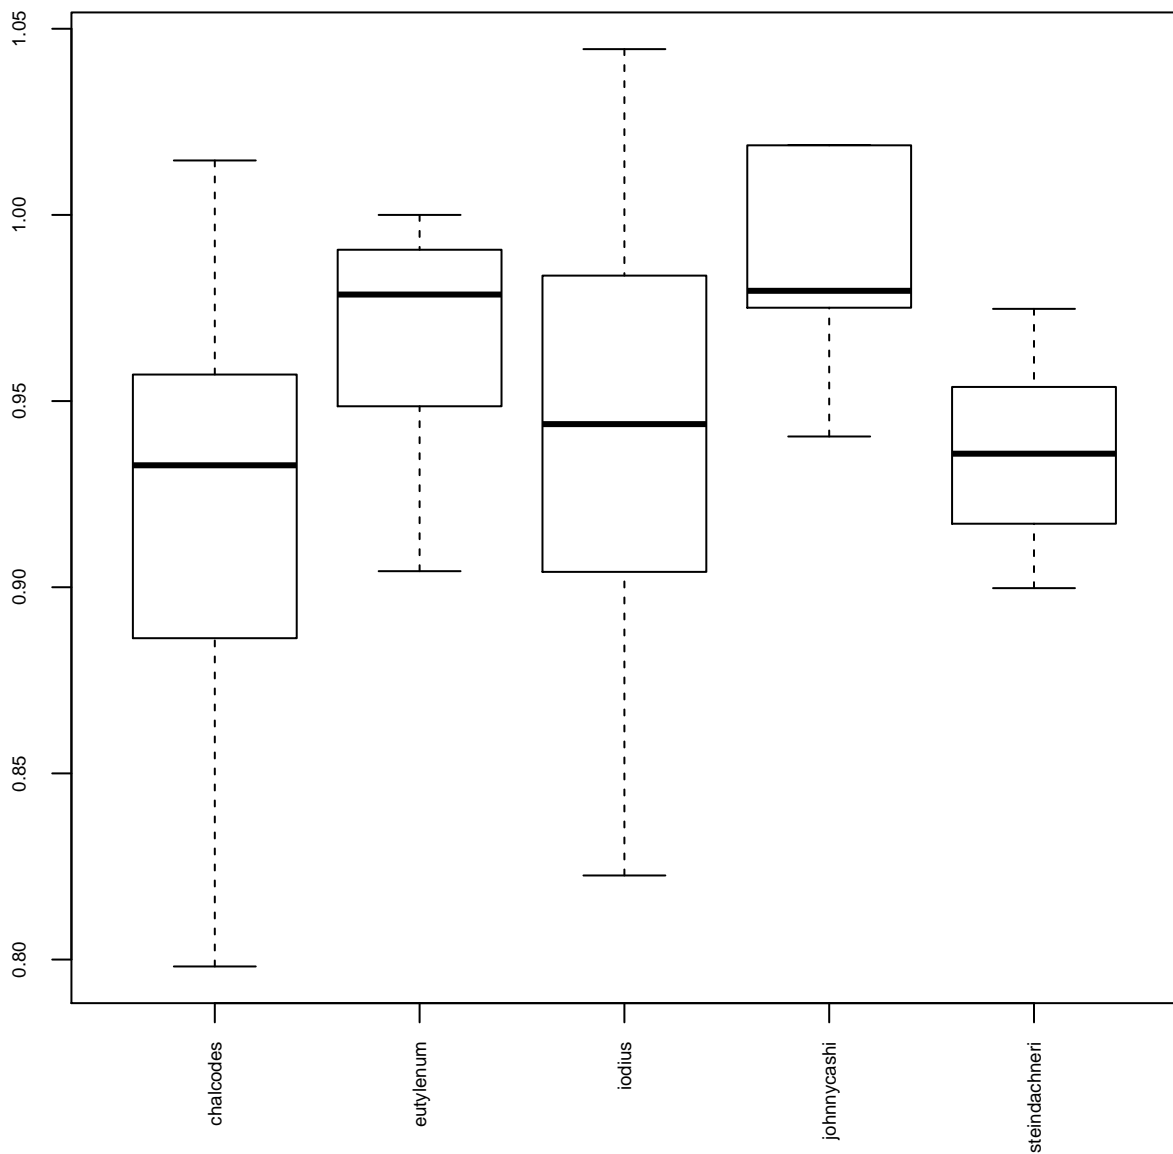

Supplement: Supplementary file 705

## Femur 3/Tibia 4 Length ratio – females

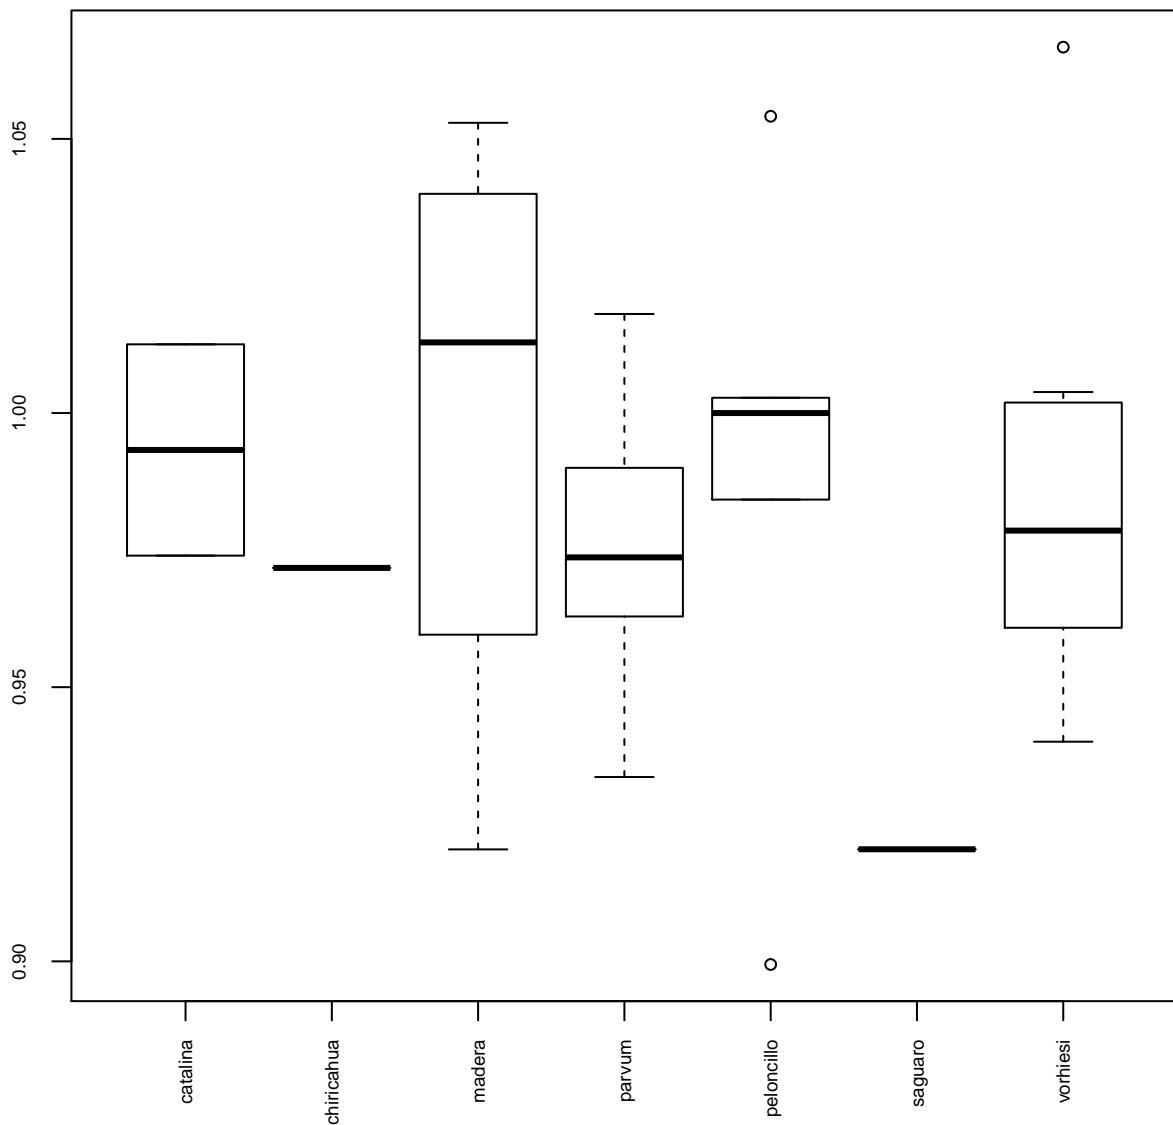

Supplement: Supplementary file 706

## Tarsus 1/Metatarsus 3 Length ratio – females

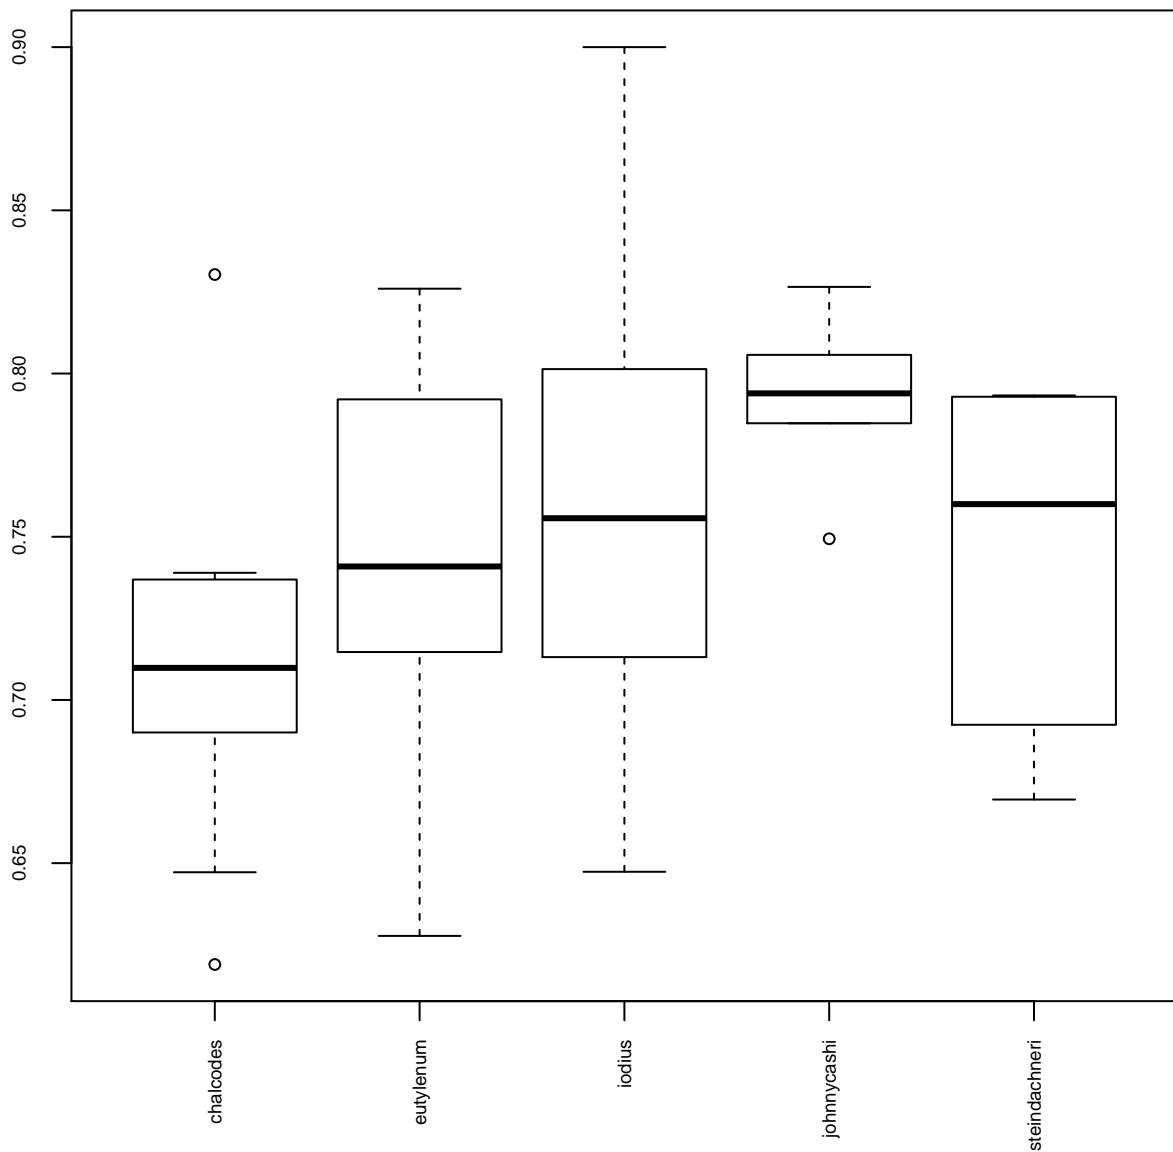

Supplement: Supplementary file 707

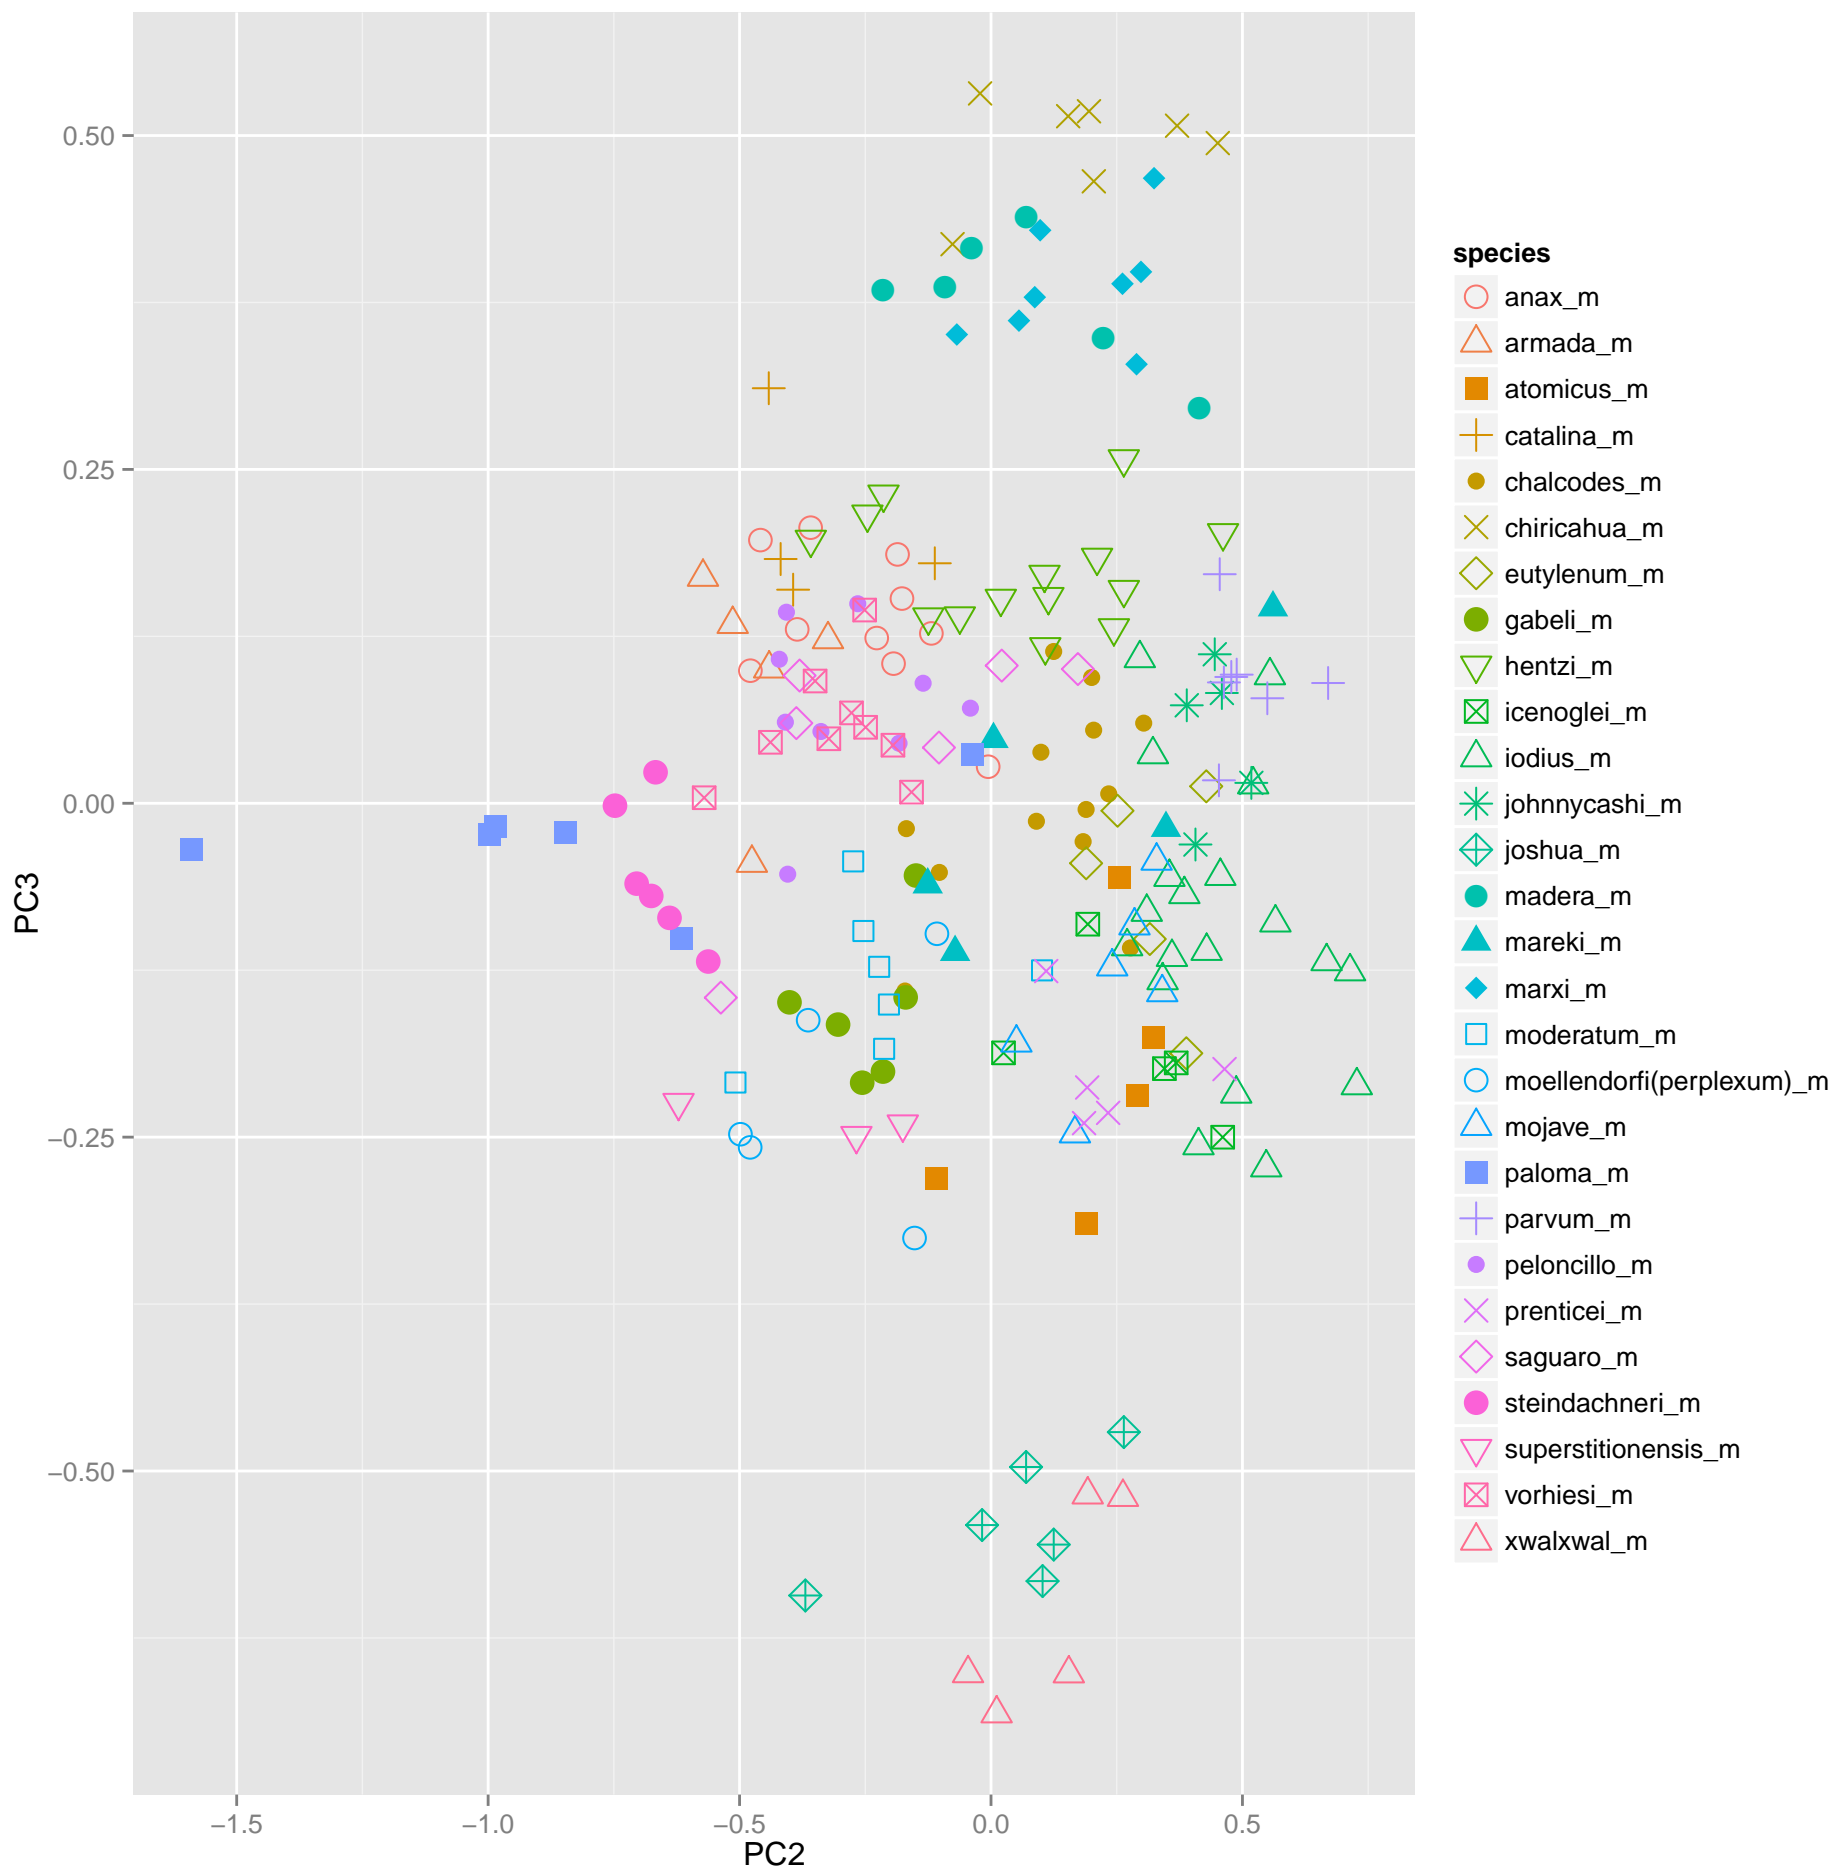

Supplement: Supplementary file 708

## Tarsus 1/Patella 3 Length ratio – females

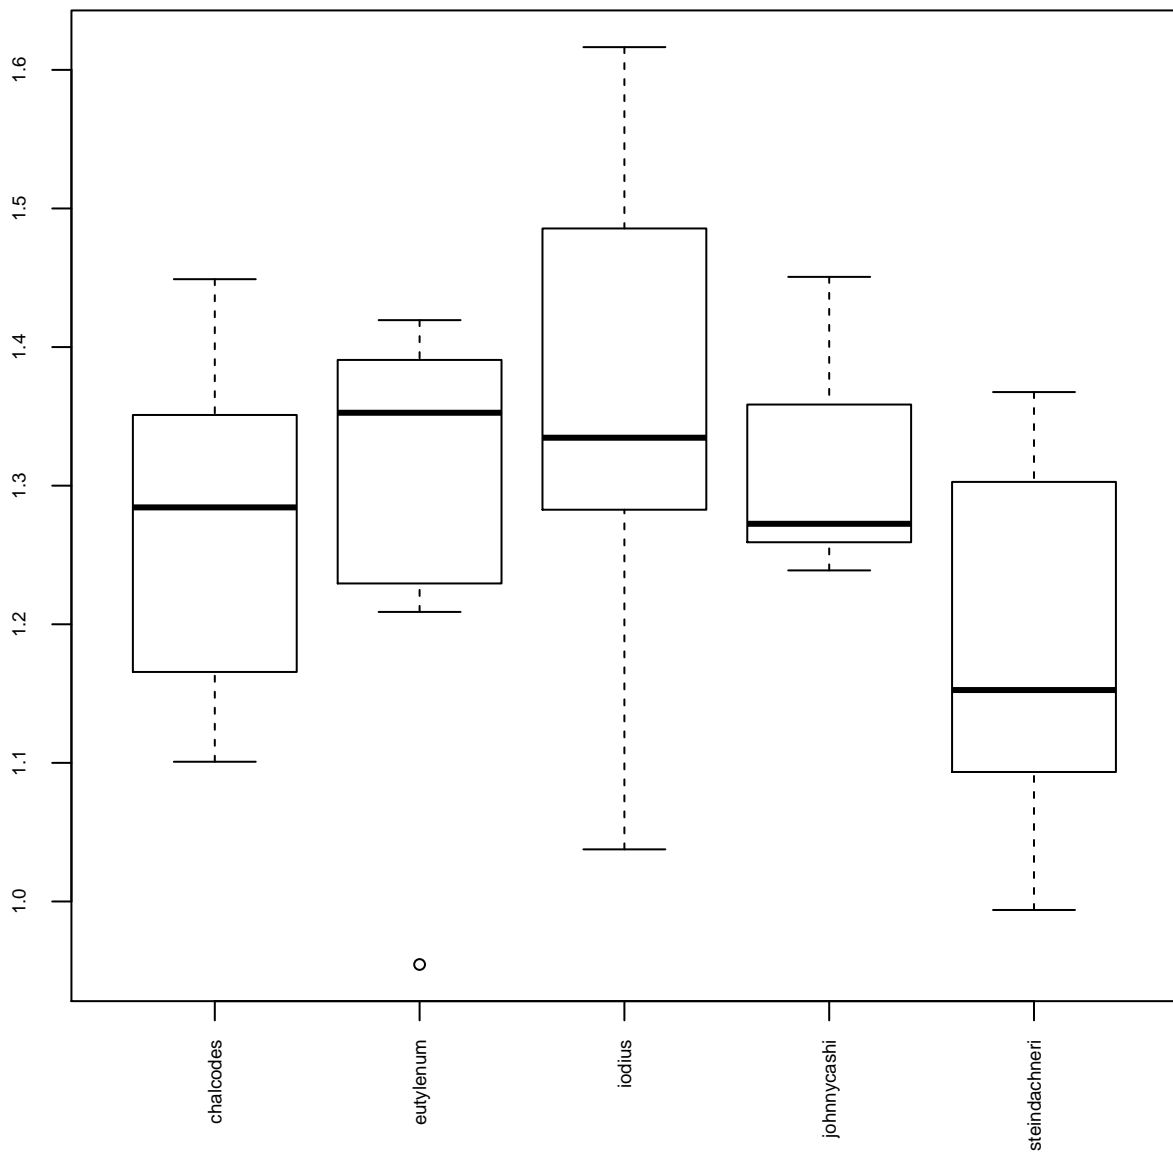

Supplement: Supplementary file 709

# Femur 3/Metatarsus 3 ratio – females

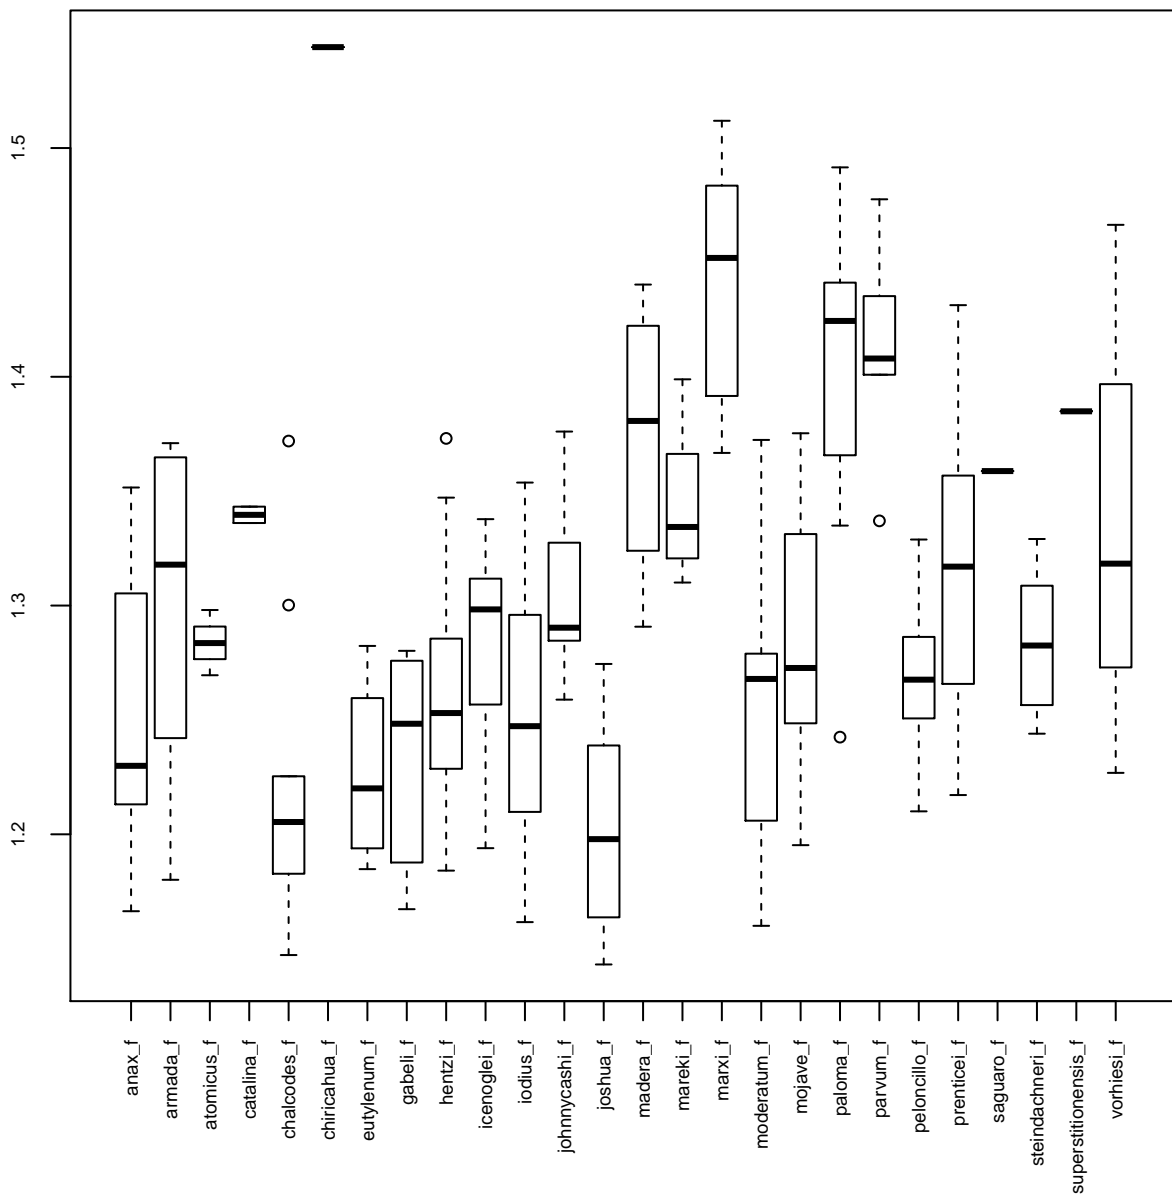

Supplement: Supplementary file 710

# Carapace Length/Patella 1 ratio – males

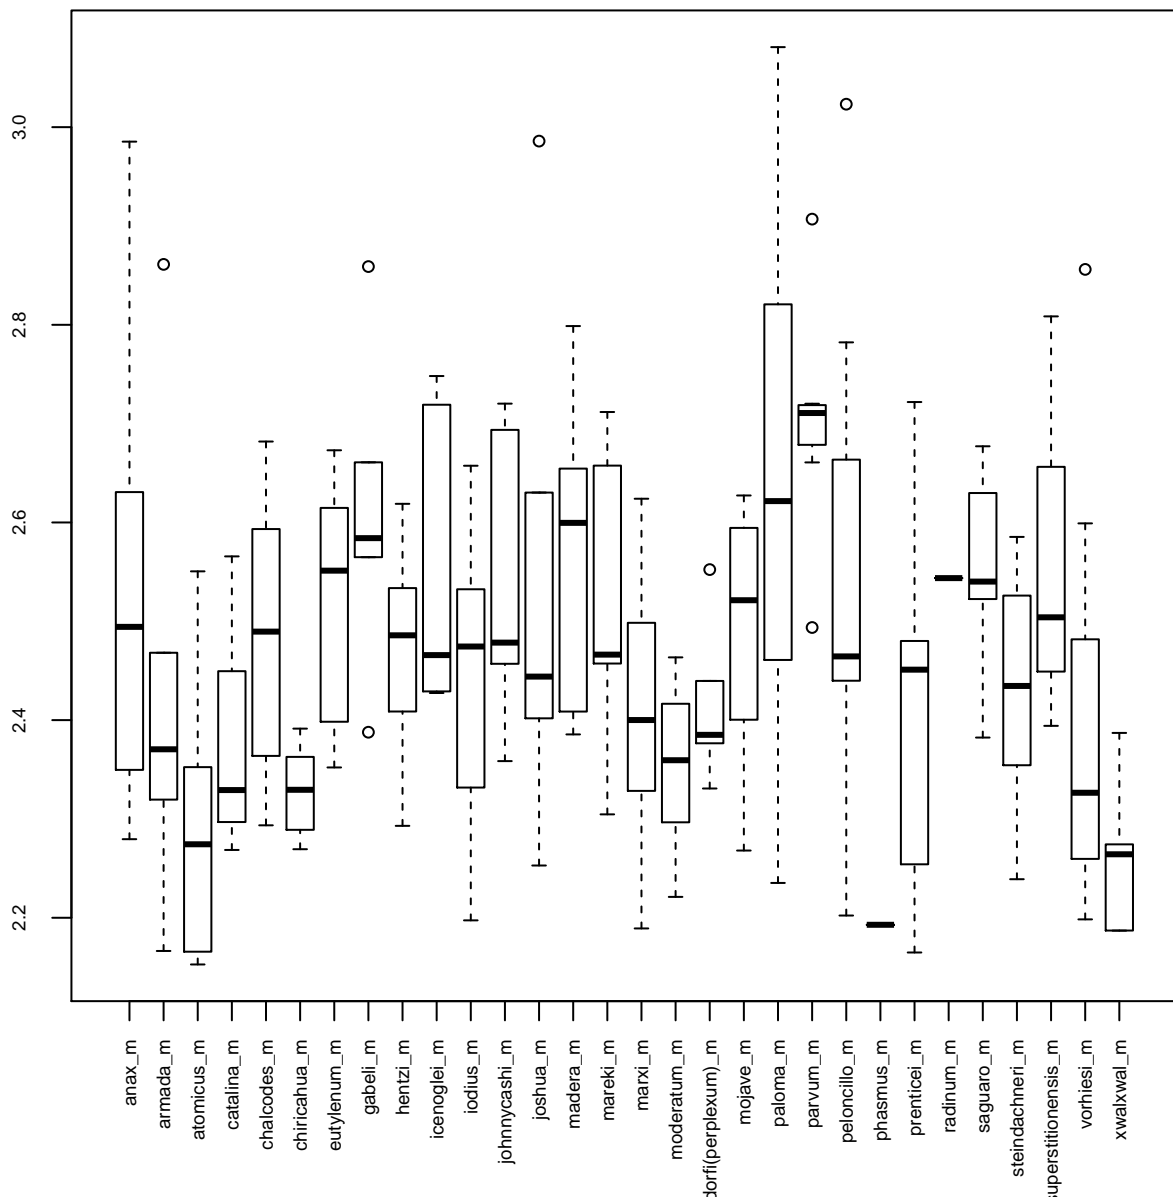

Supplement: Supplementary file 711

## Carapace Length/Patella 4 ratio – females

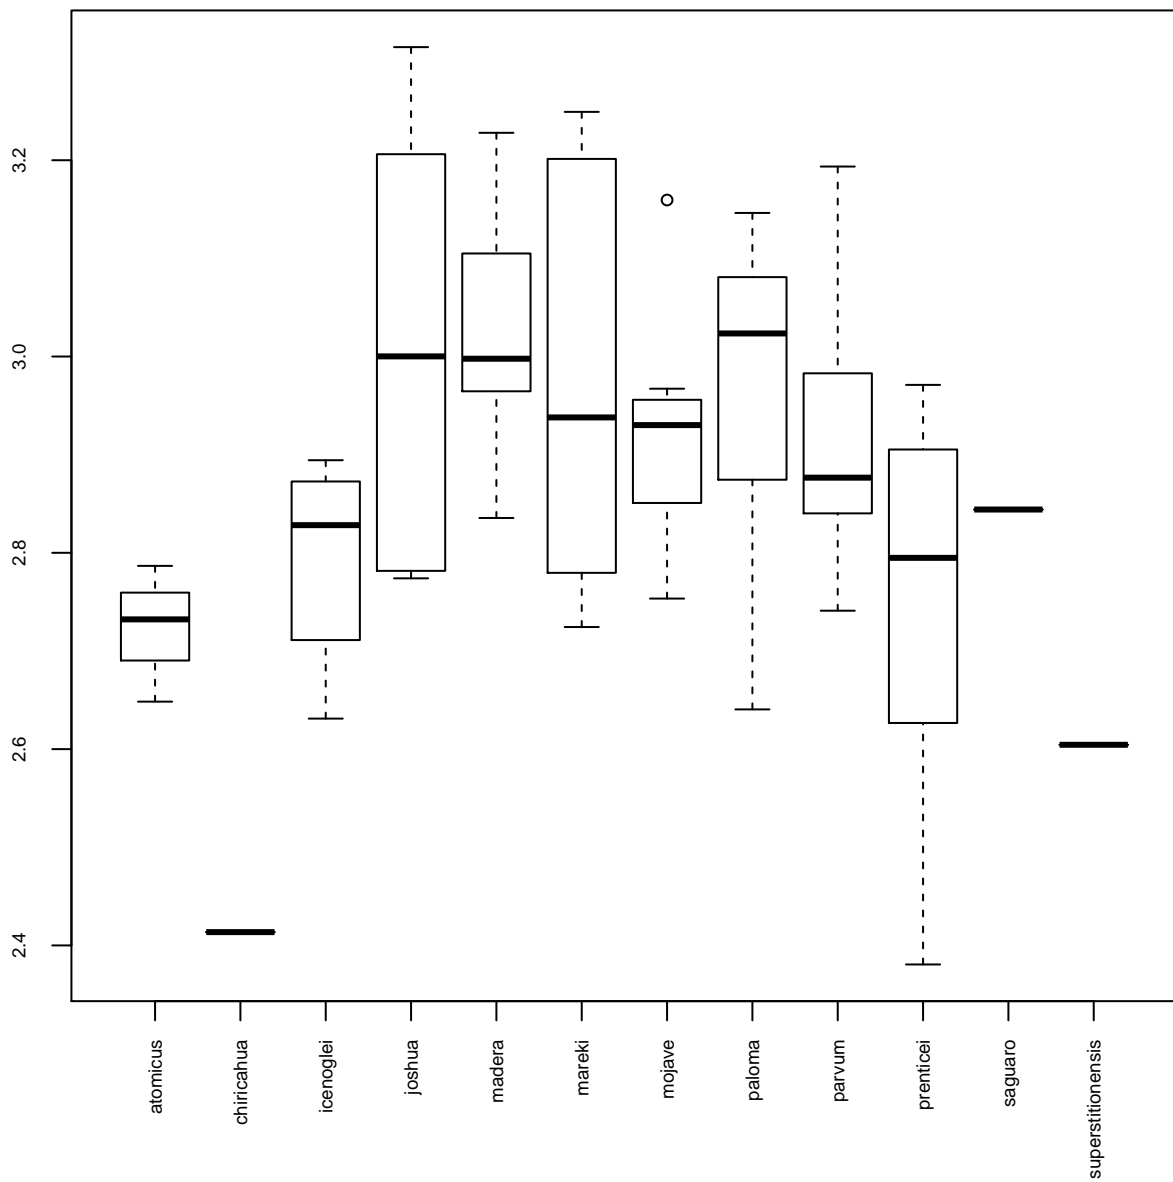

Supplement: Supplementary file 712

## Tibia 1/Tarsus 4 Length ratio – males

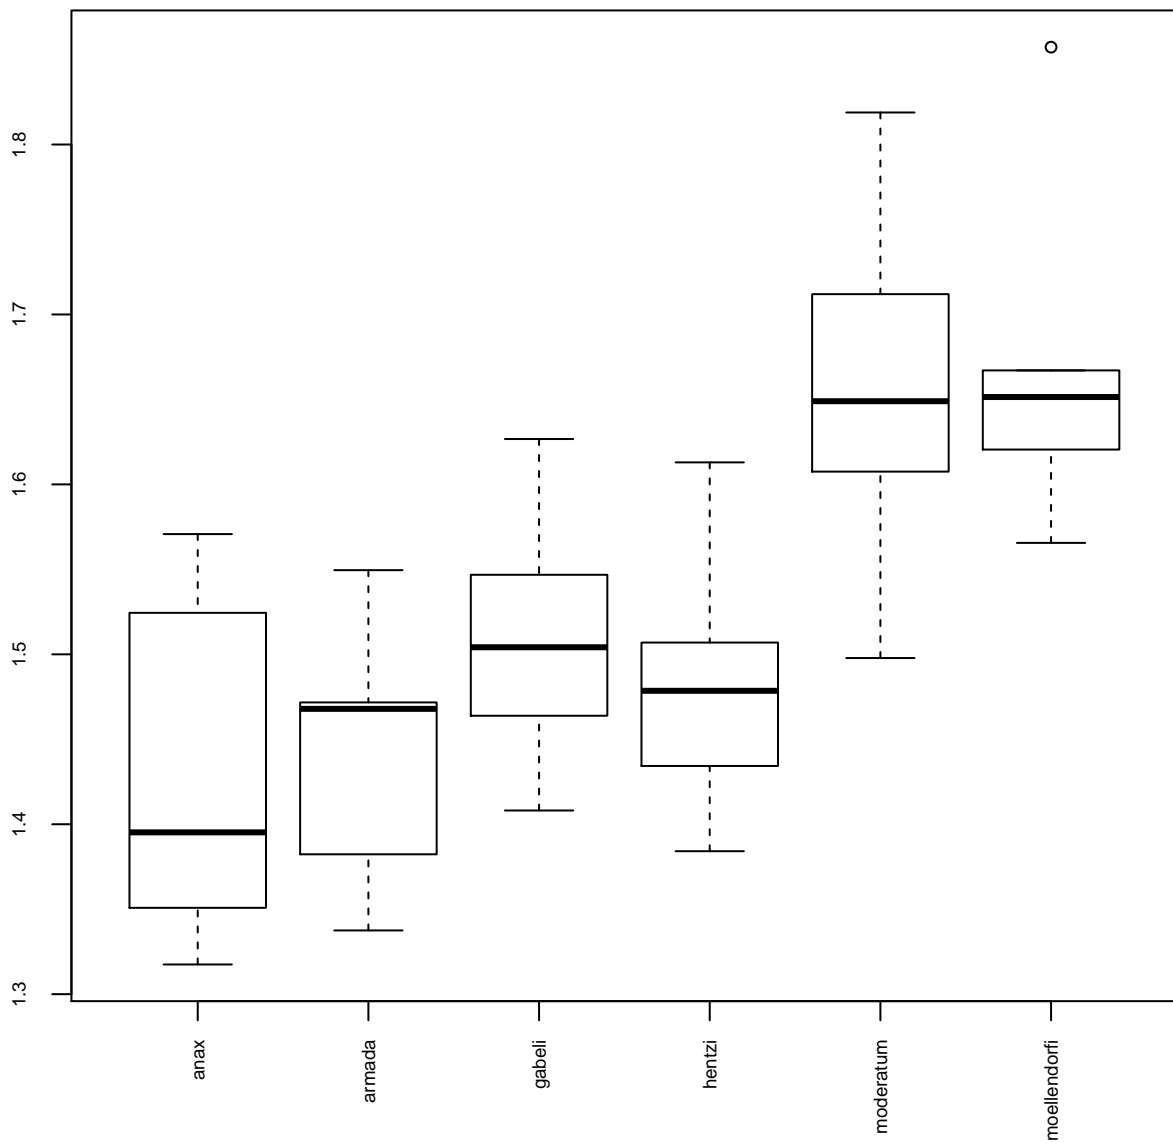

Supplement: Supplementary file 713

## Tarsus 3/Patella 4 Length ratio – males

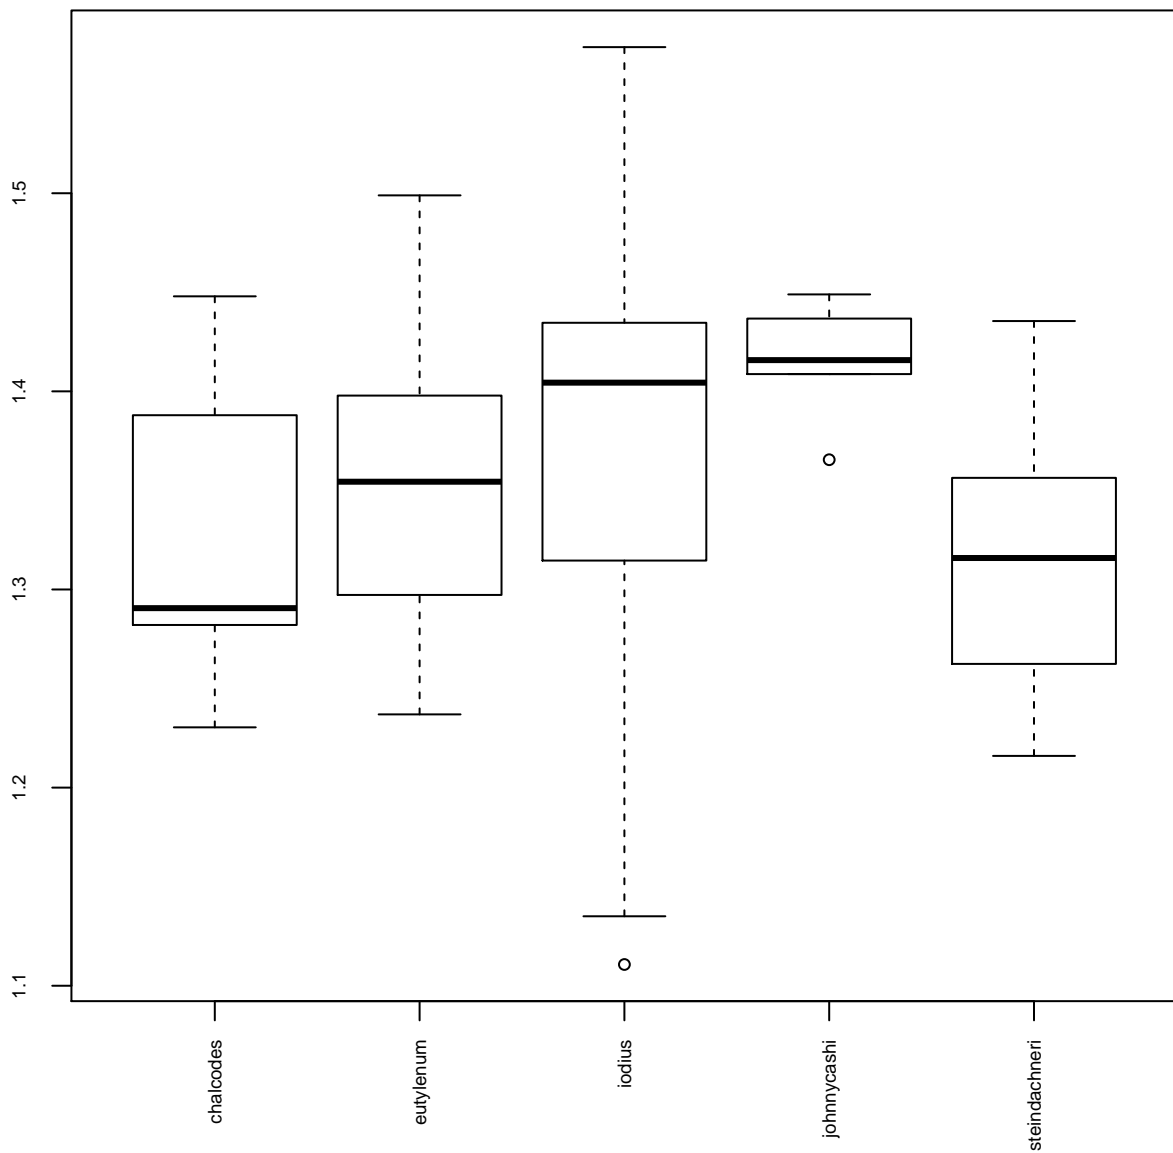

Supplement: Supplementary file 714

## Tibia 1/Tibia 3 ratio – females

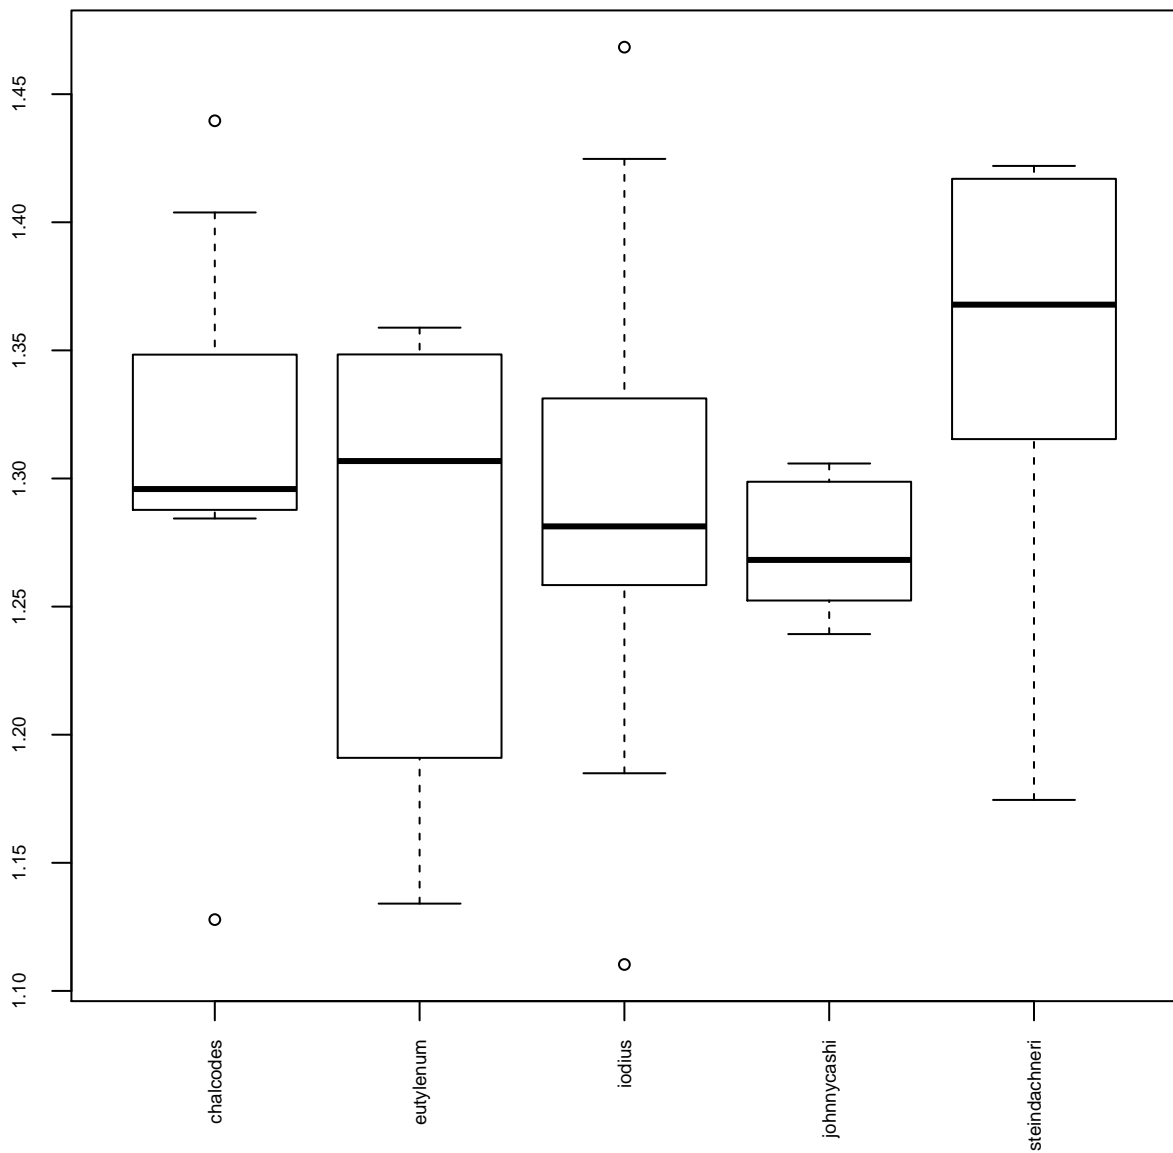

Supplement: Supplementary file 715

# Patella 1/Tarsus 3 Length ratio – males

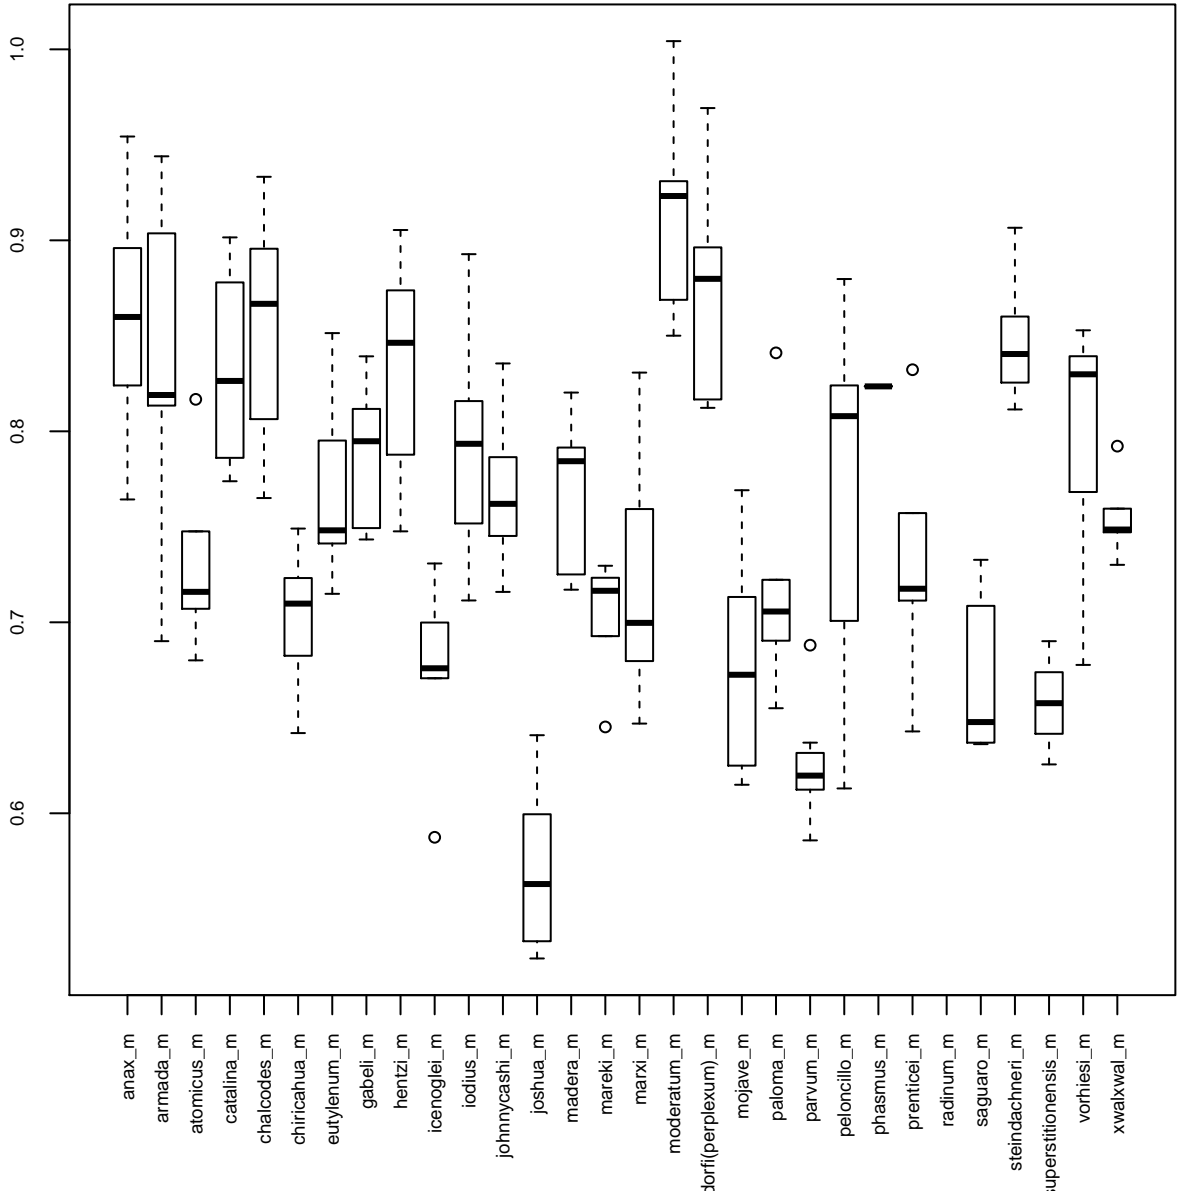

Supplement: Supplementary file 716

## Tibia 1/Tarsus 3 Length ratio – females

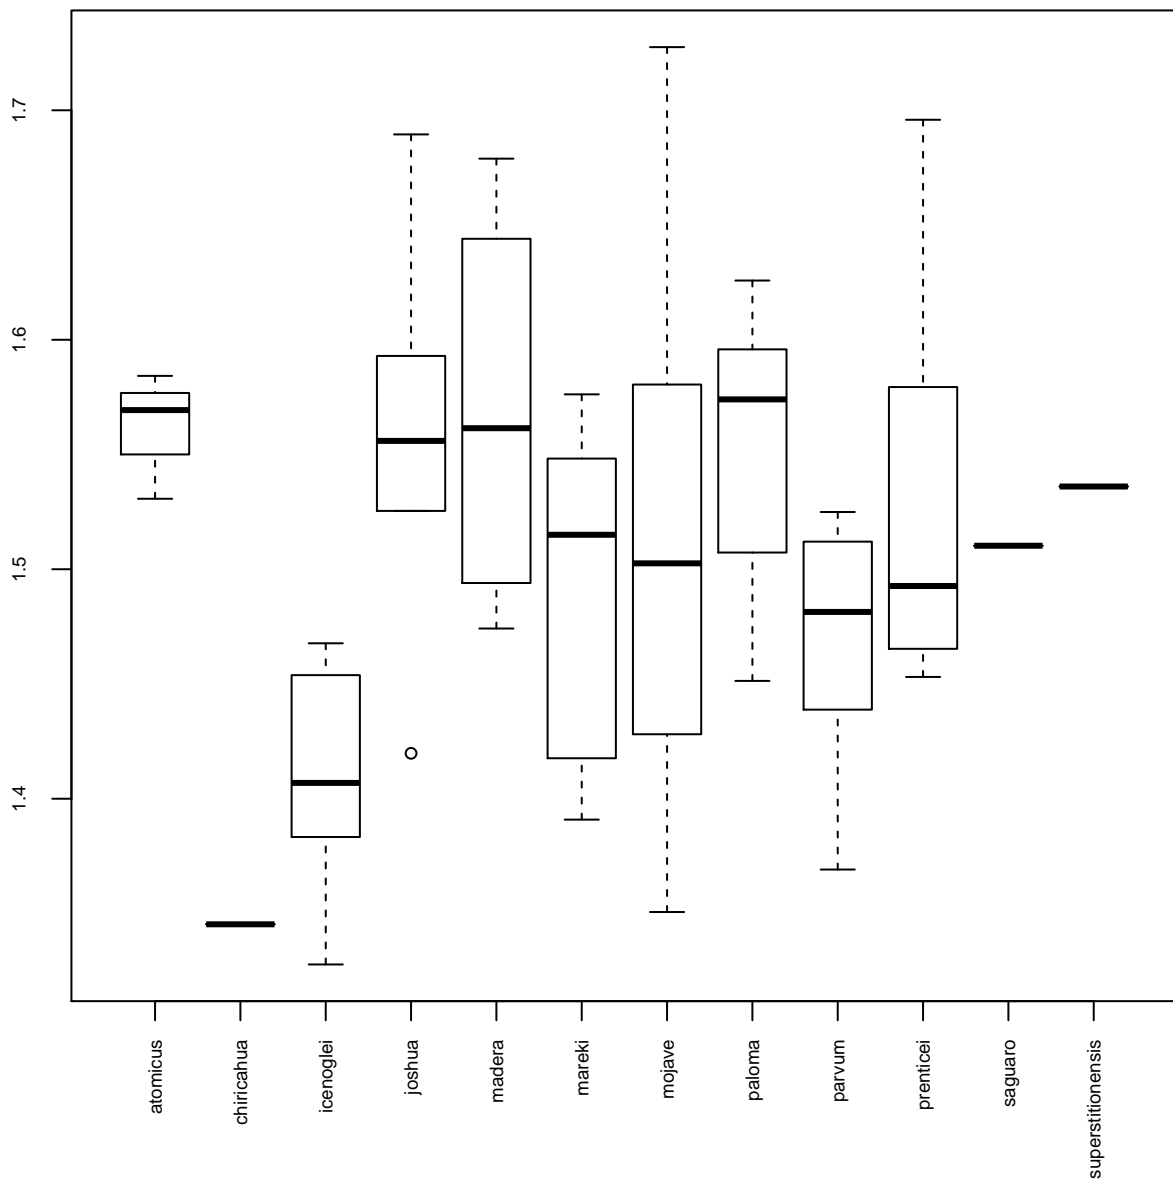

Supplement: Supplementary file 717

## Leg 4 Length/Carapace Length ratio – males

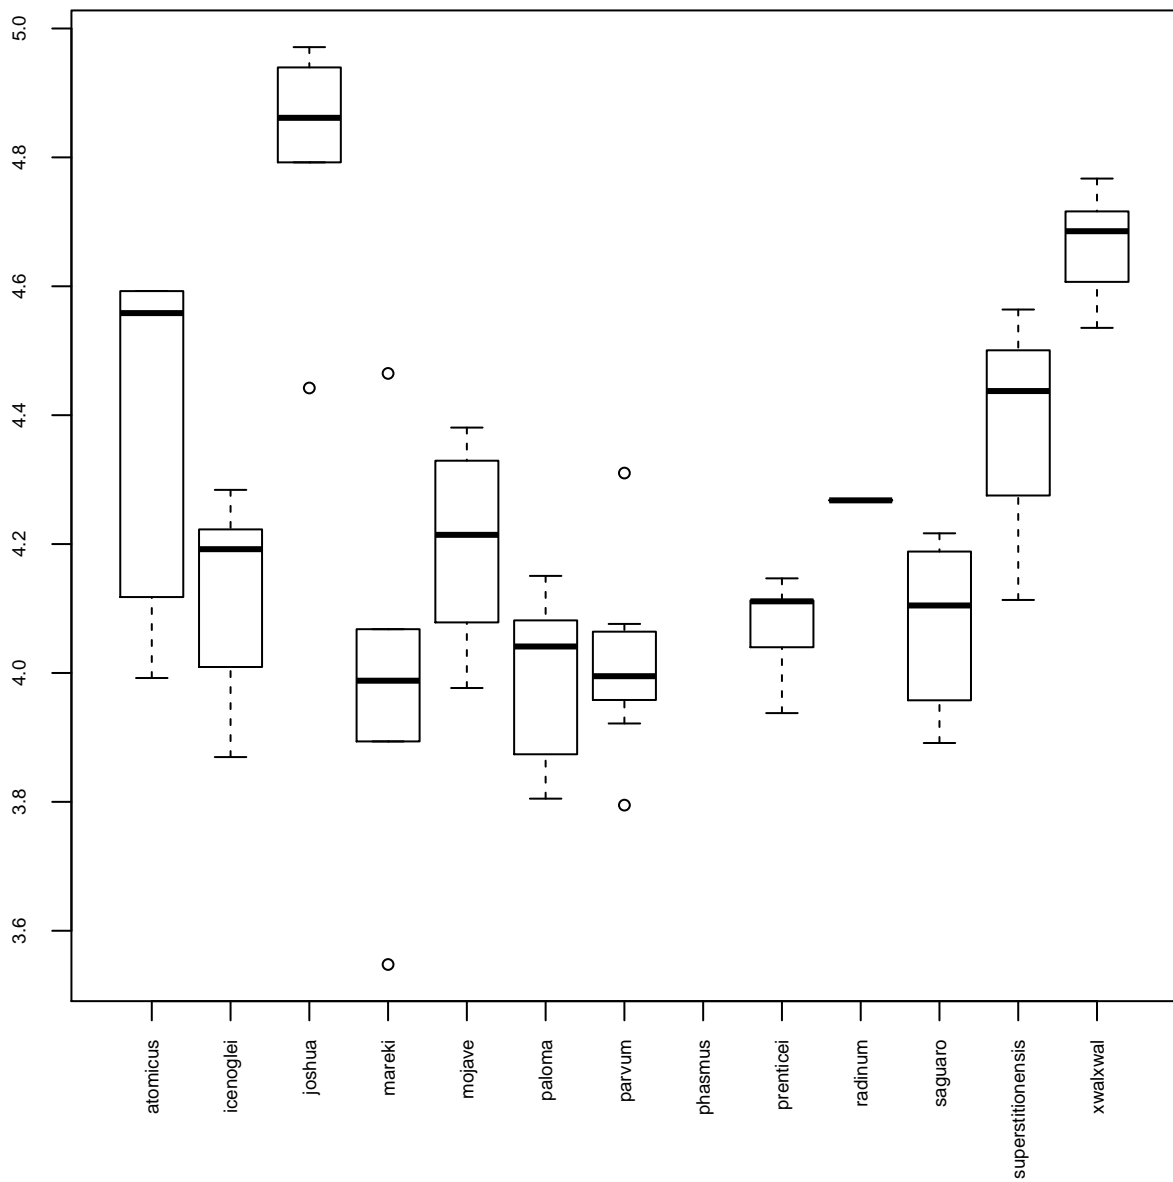

Supplement: Supplementary file 718

## Femur 3/Tibia 3 ratio – females

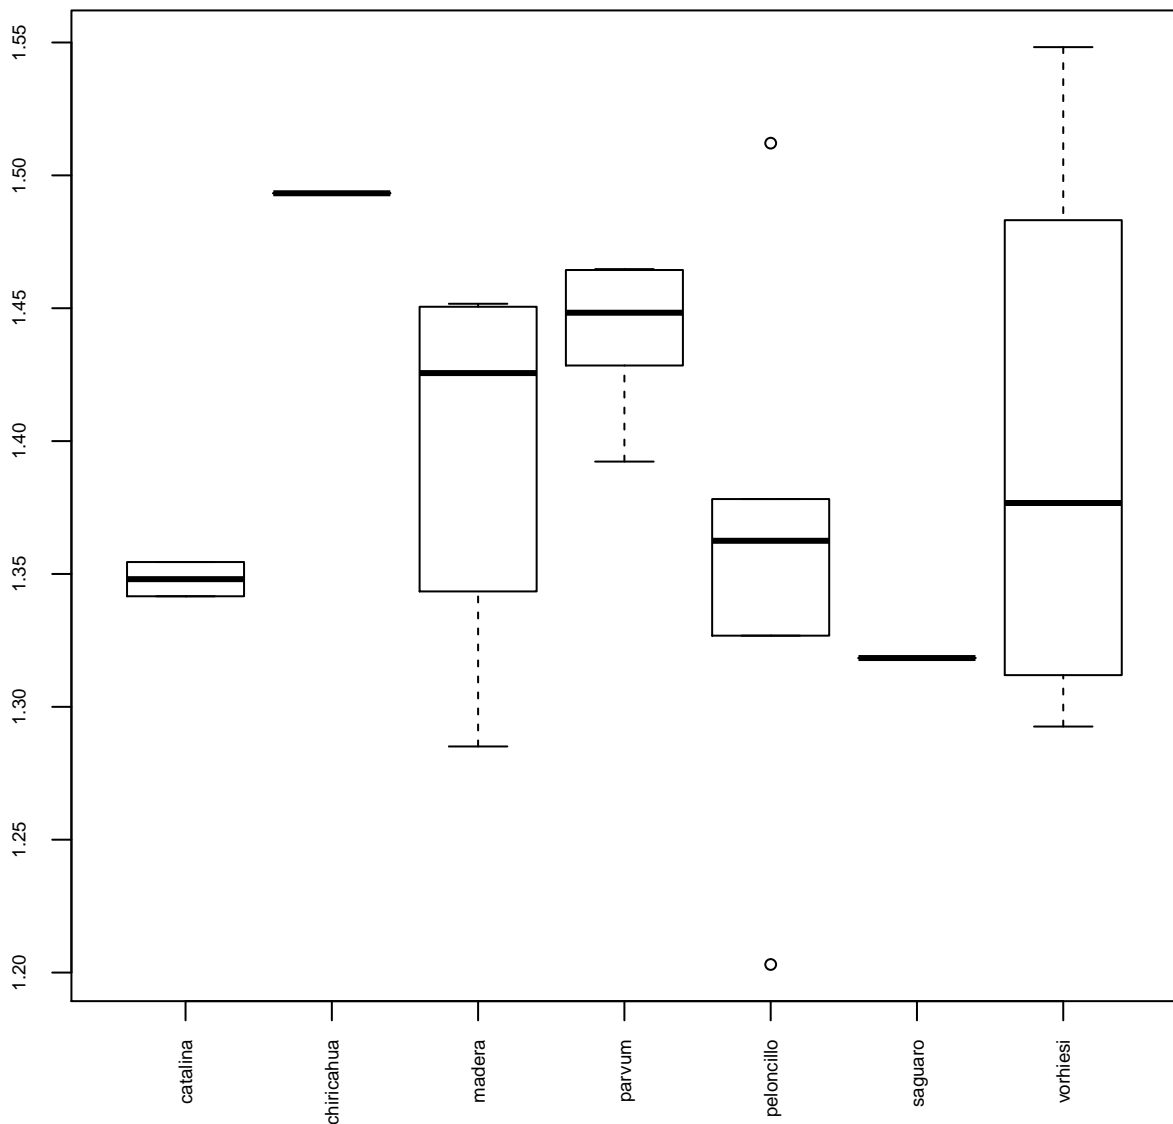

Supplement: Supplementary file 719

## Tarsus 1/Metatarsus 3 Length ratio – males

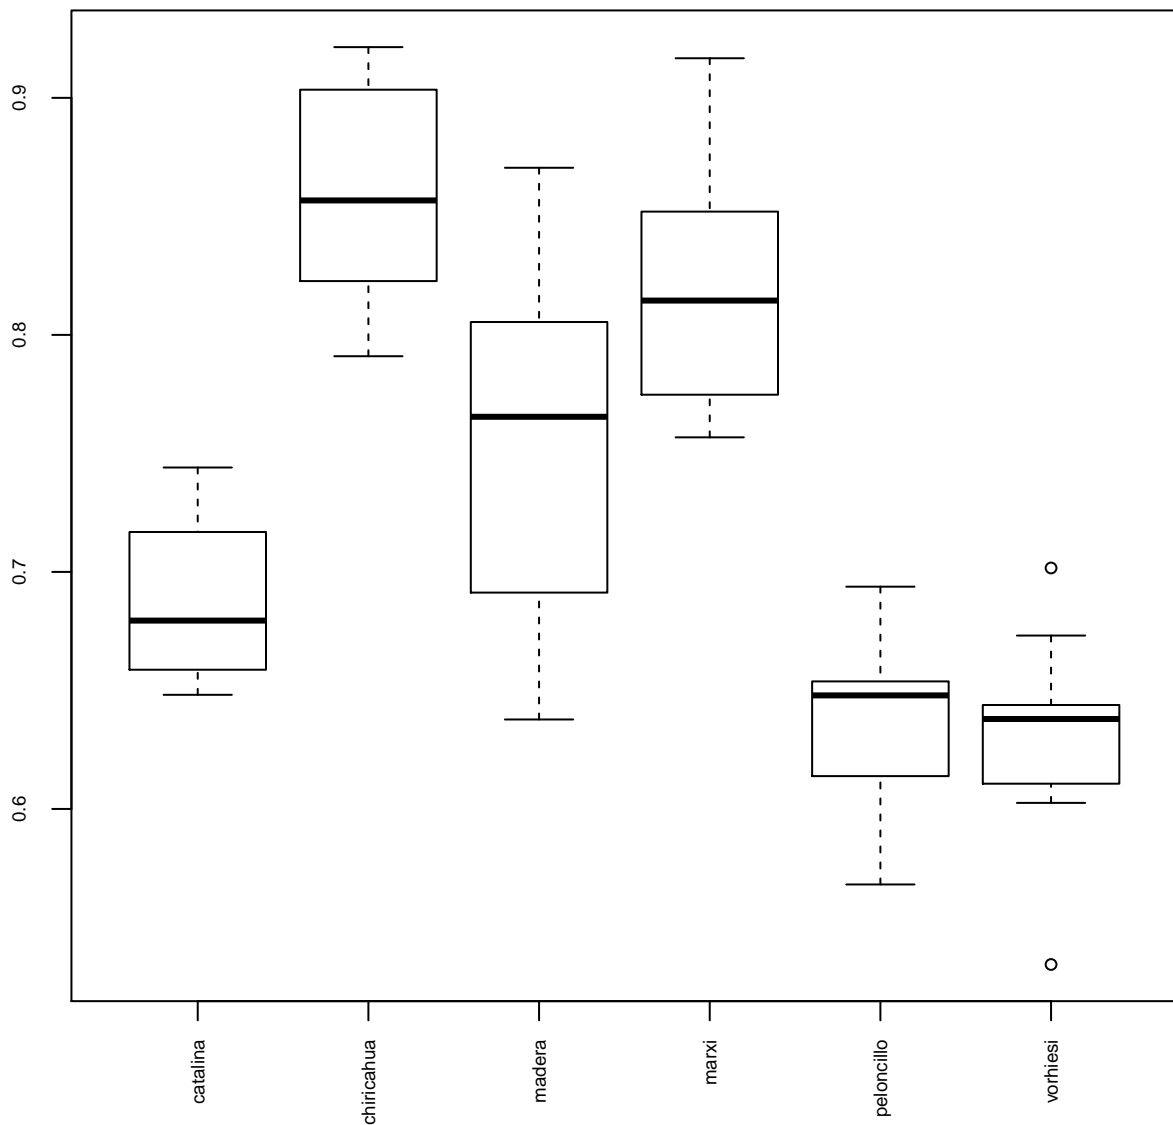

Supplement: Supplementary file 720

## Tarsus 3/Tarsus 4 ratio – males

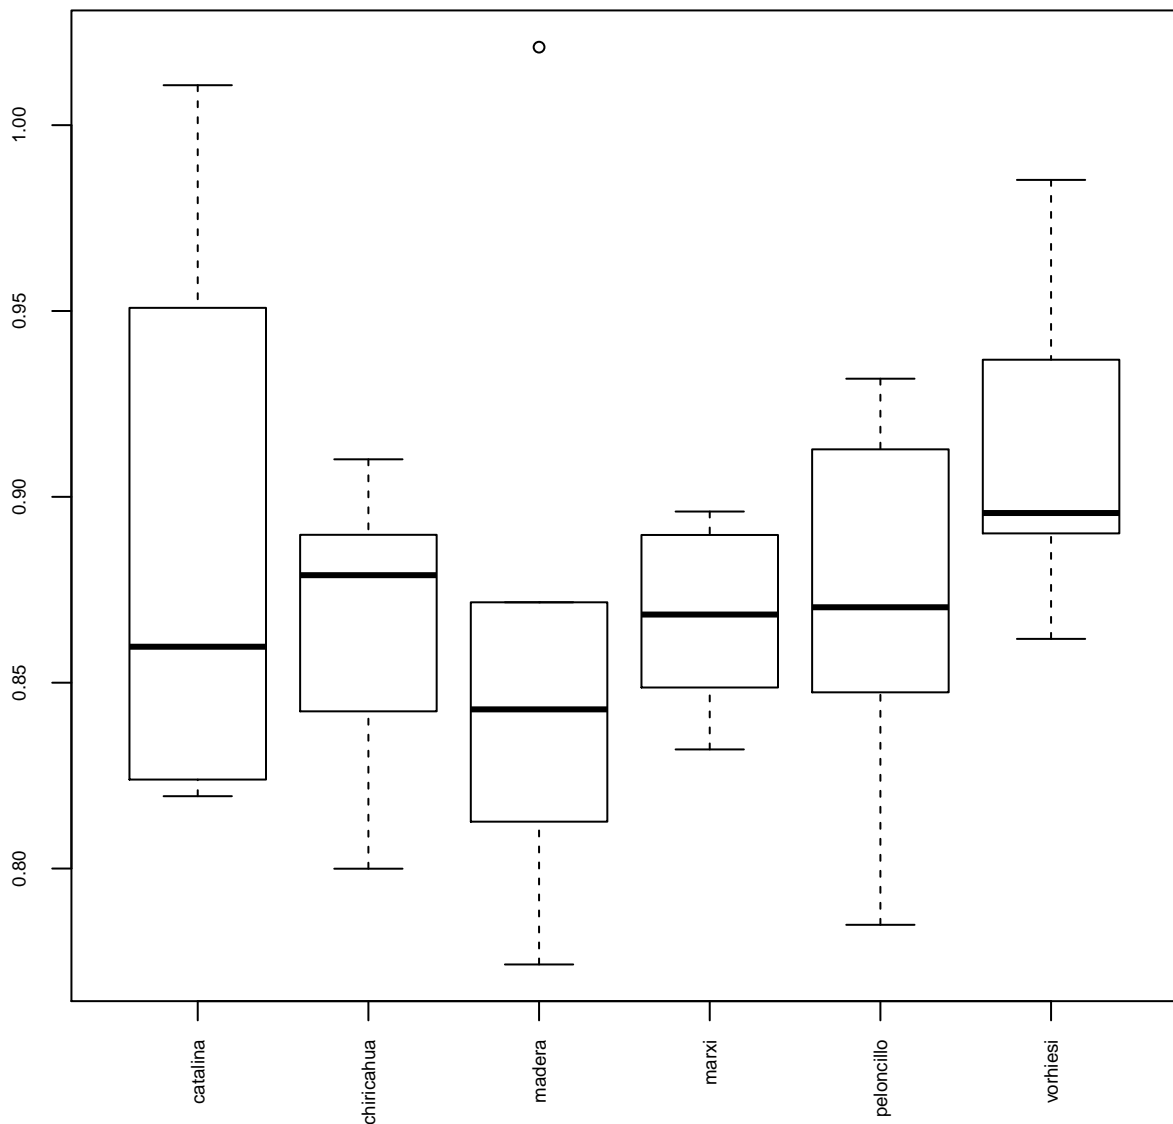

Supplement: Supplementary file 721

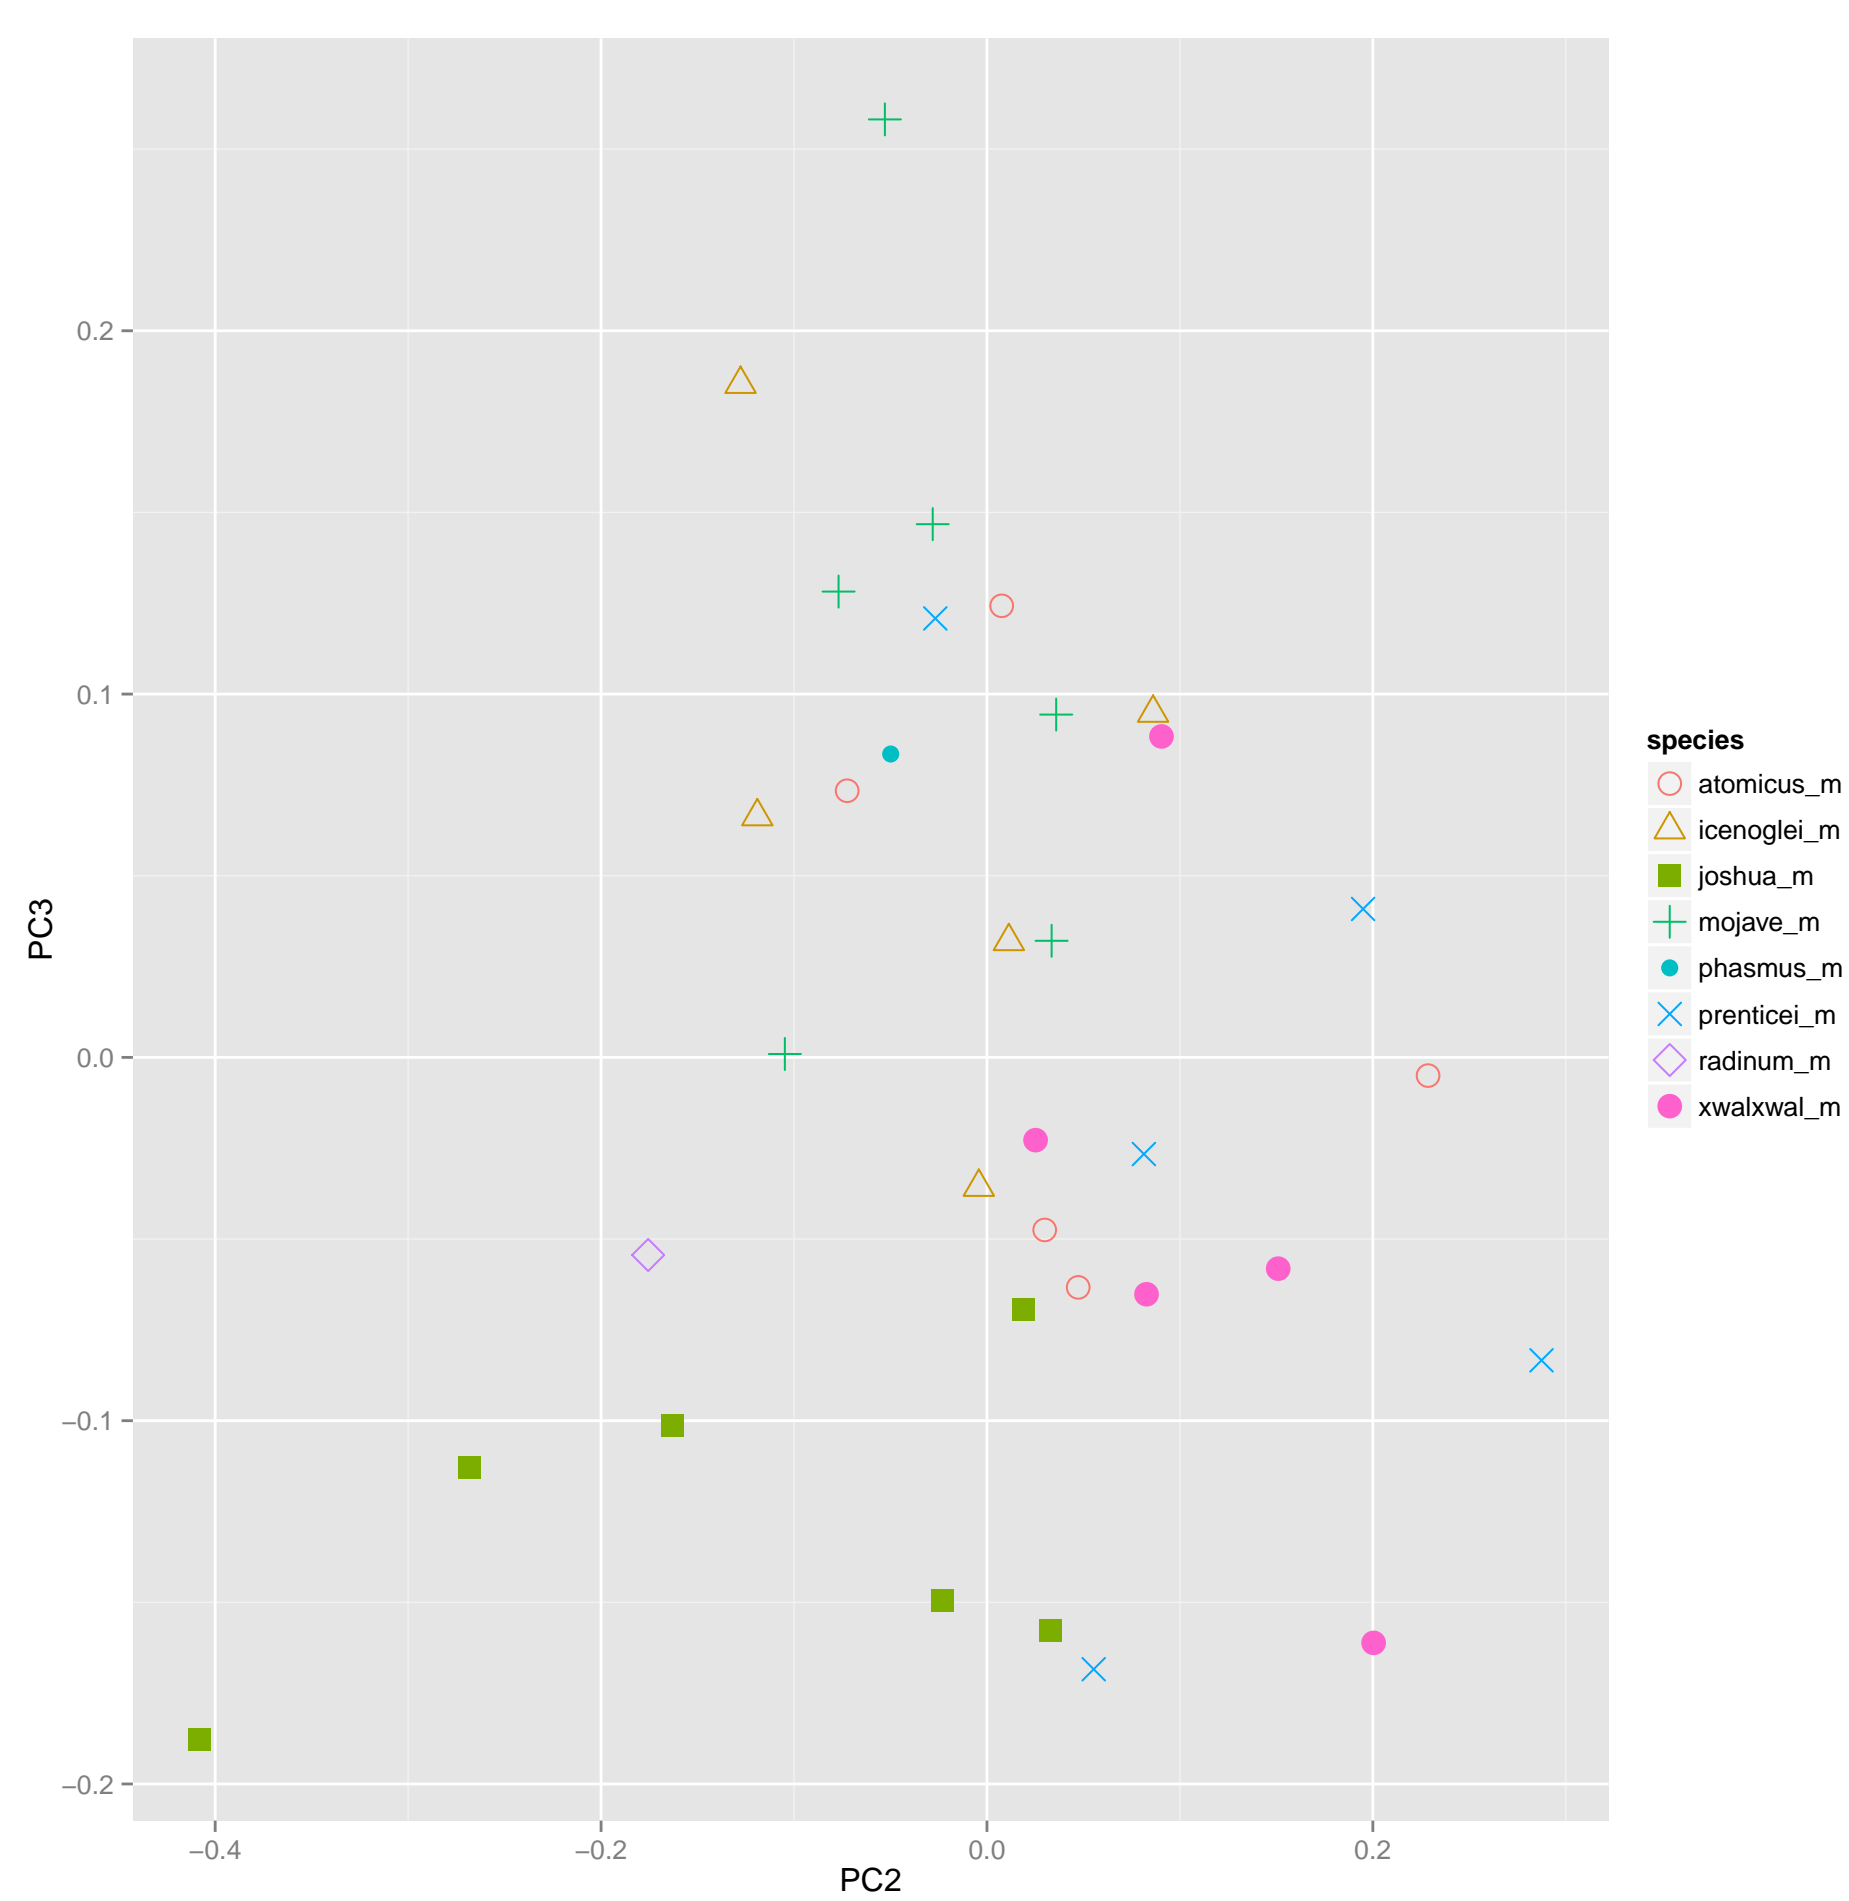

Supplement: Supplementary file 722

## Patella 1/Tibia 3 Length ratio – males

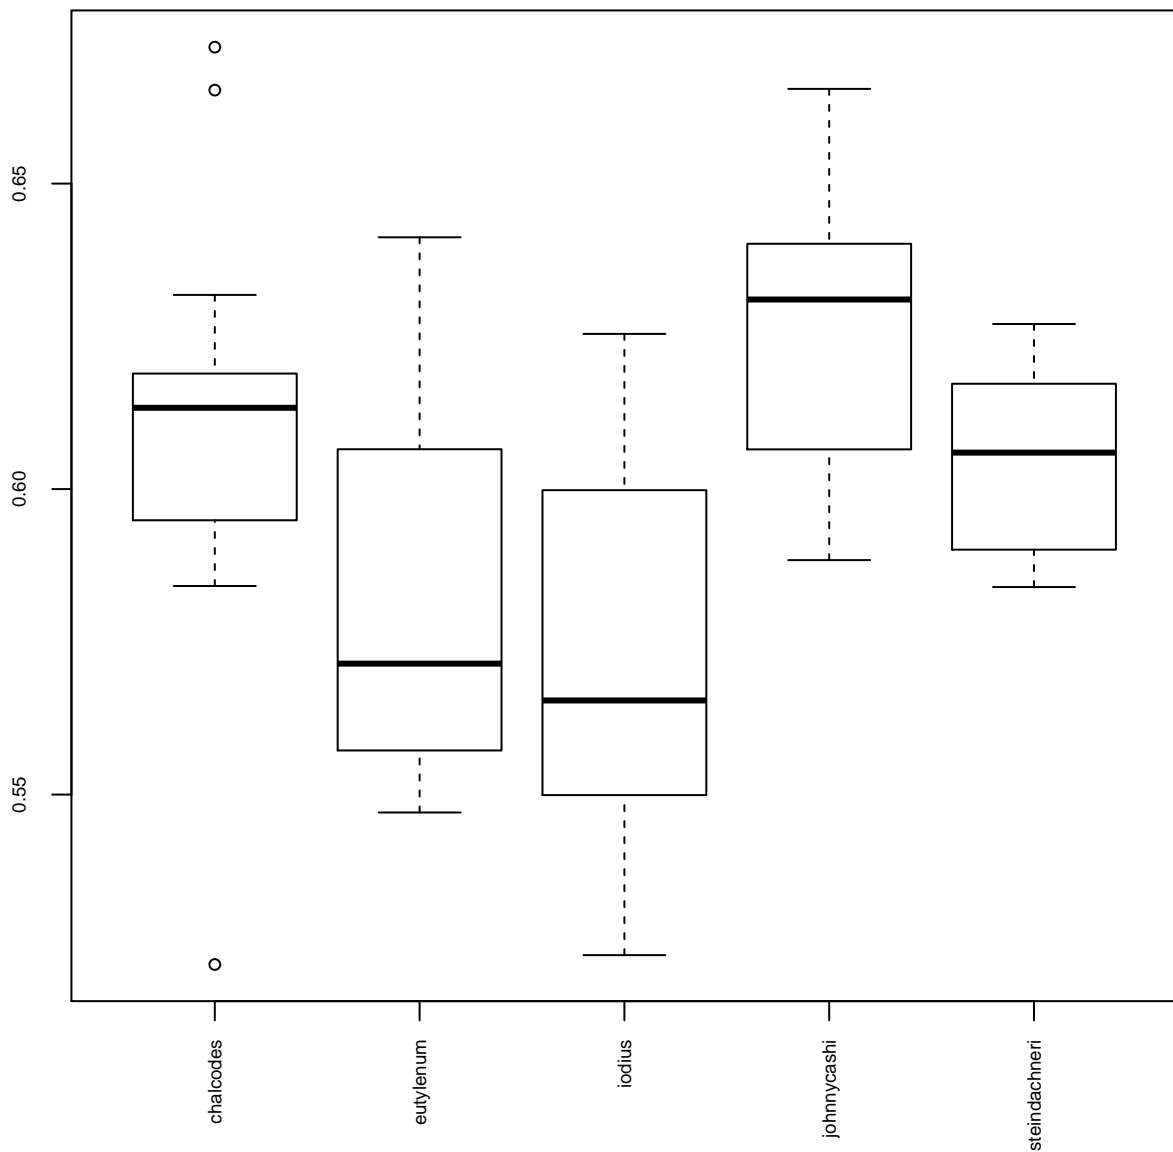

Supplement: Supplementary file 723

## Patella 1/Tarsus 1 ratio – females

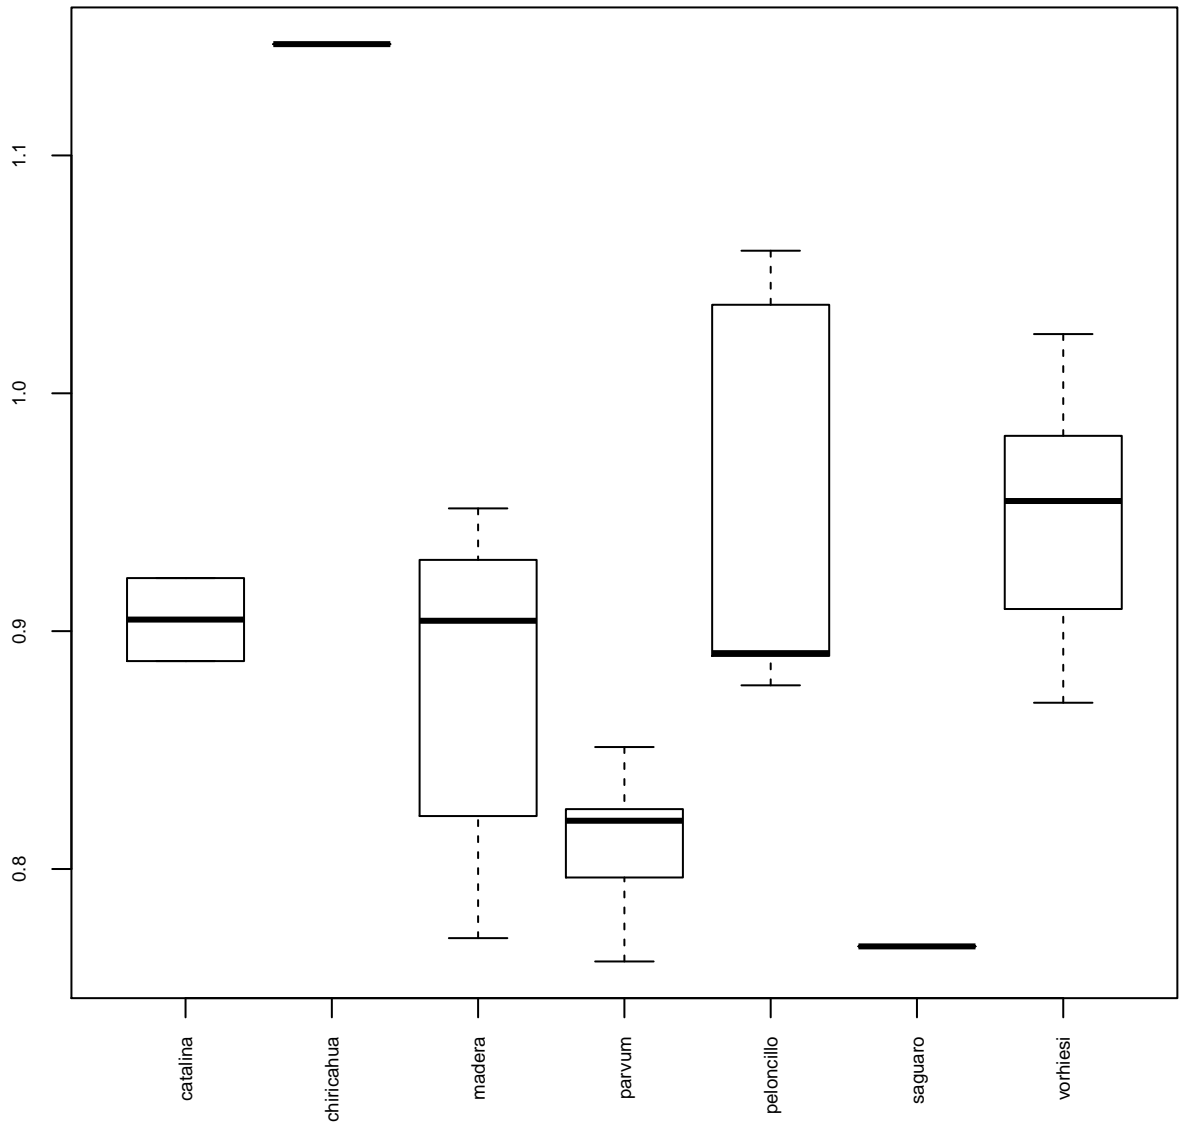

Supplement: Supplementary file 724

## Patella 1/Femur 3 Length ratio – females

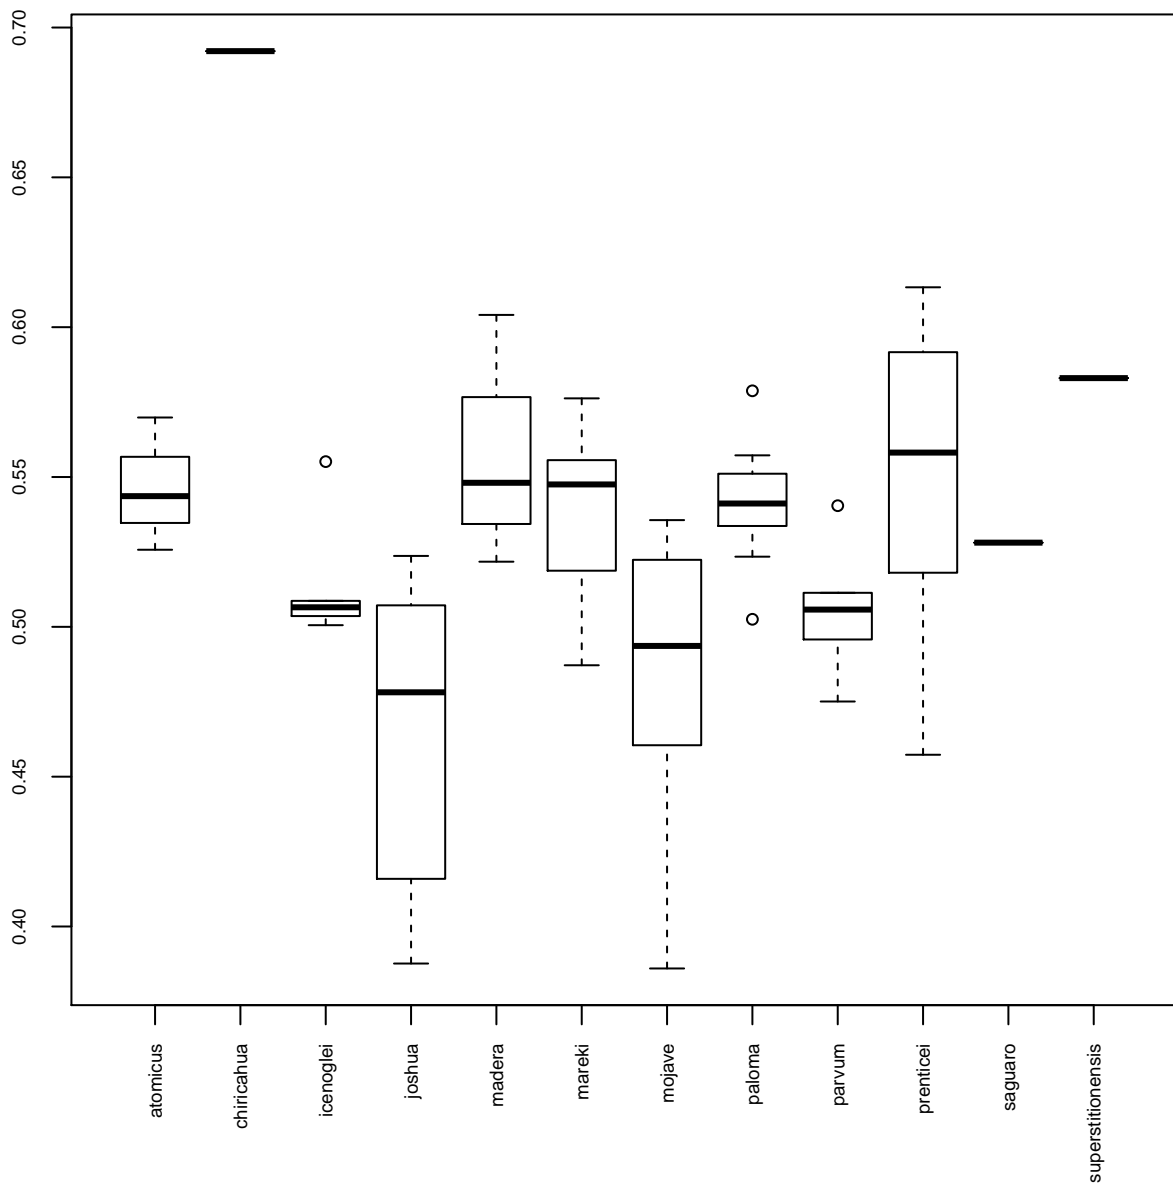

Supplement: Supplementary file 725

## Patella 3/Tibia 3 ratio – females

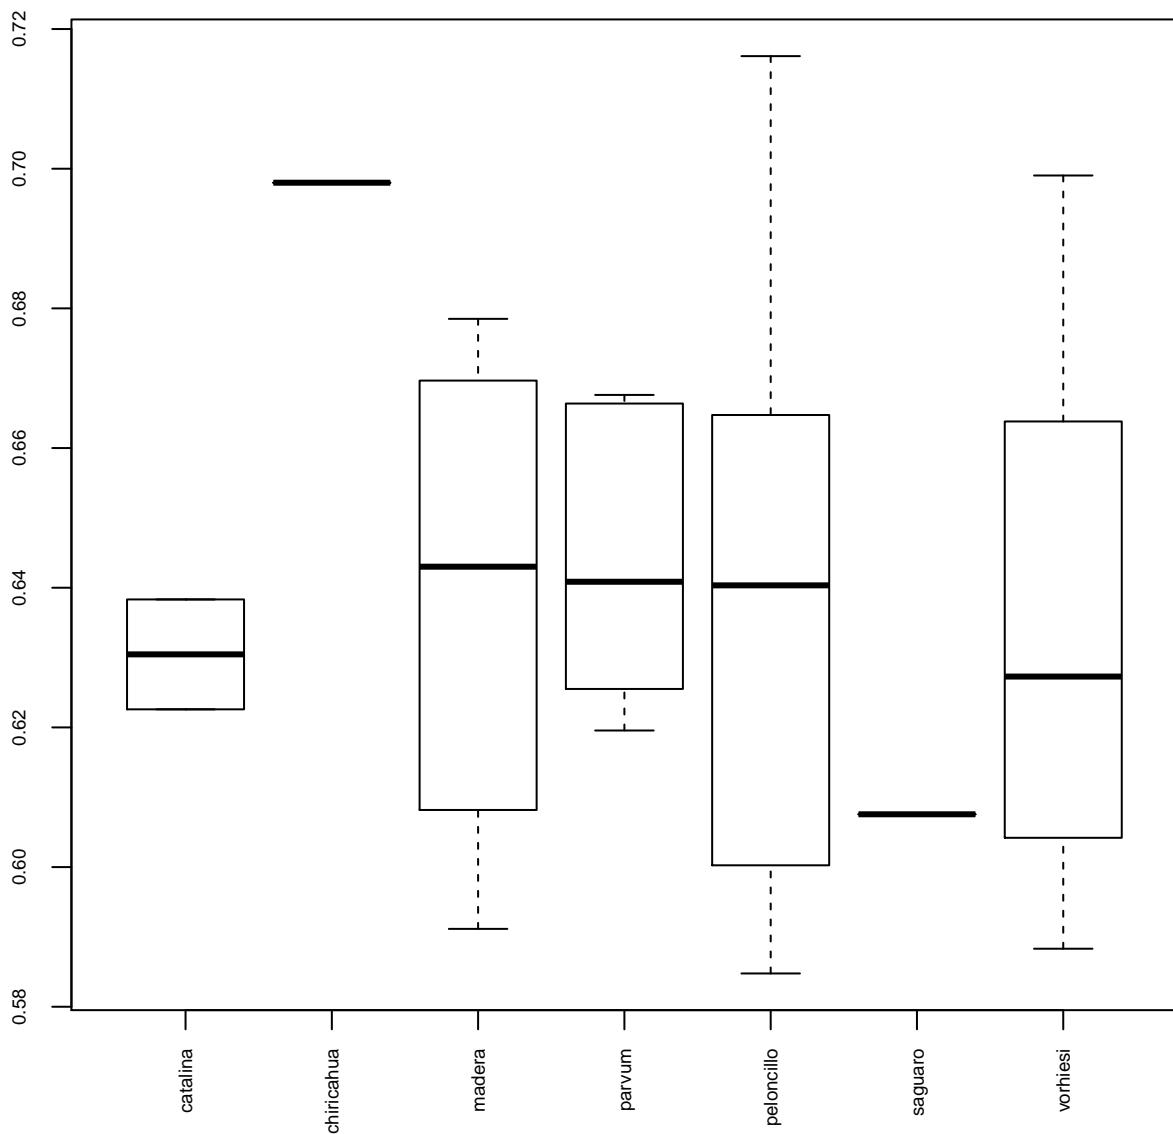

Supplement: Supplementary file 726

## Carapace Length/Tarsus 3 ratio – females

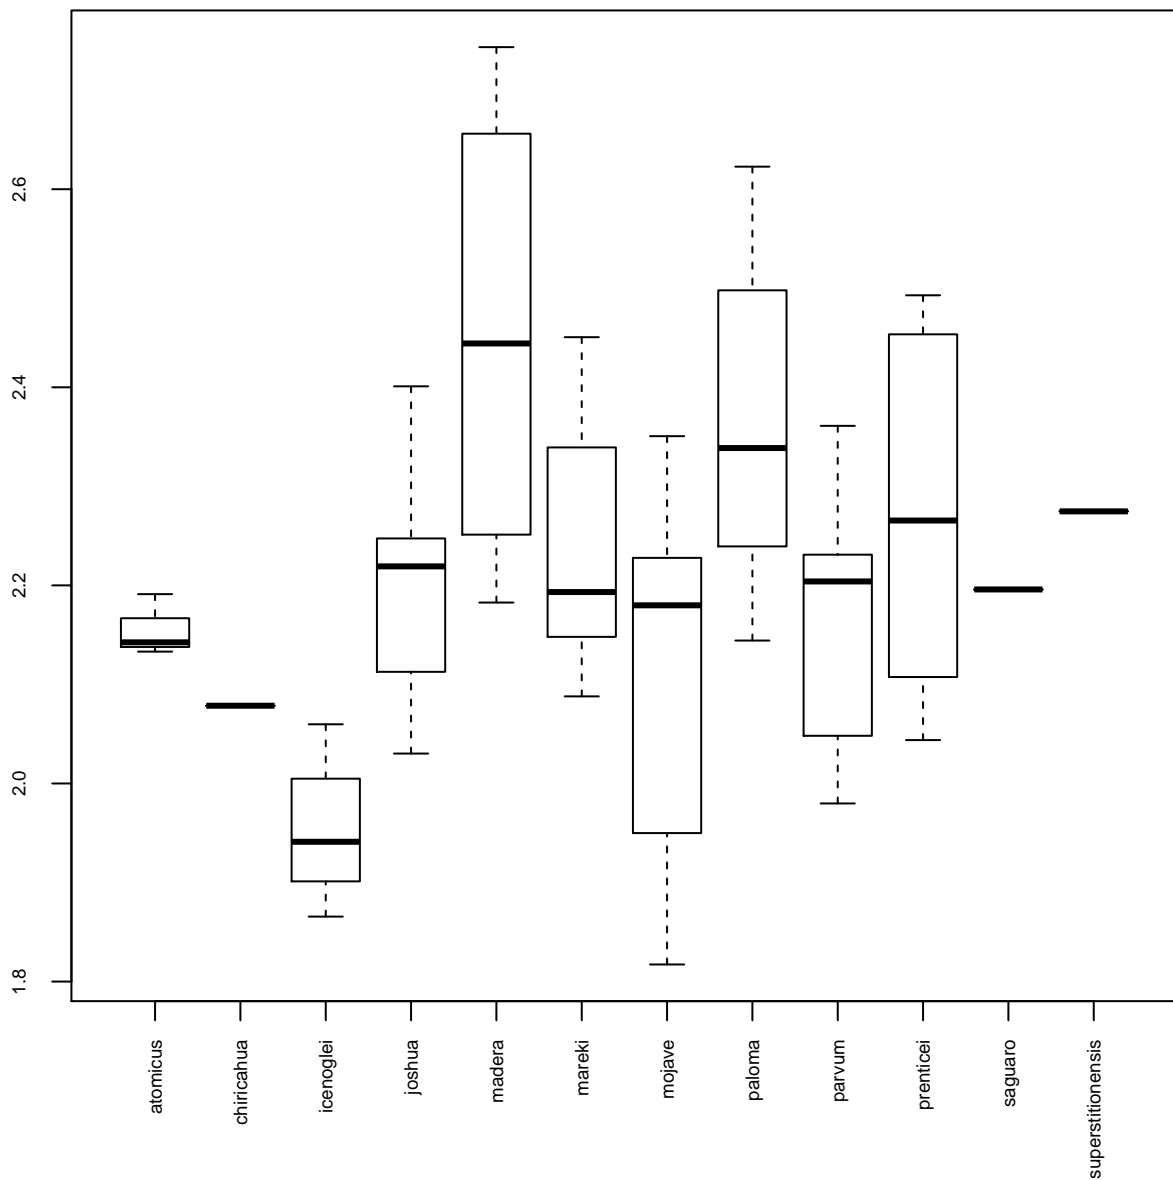

Supplement: Supplementary file 727

## Femur 3 Length/Width ratio – females

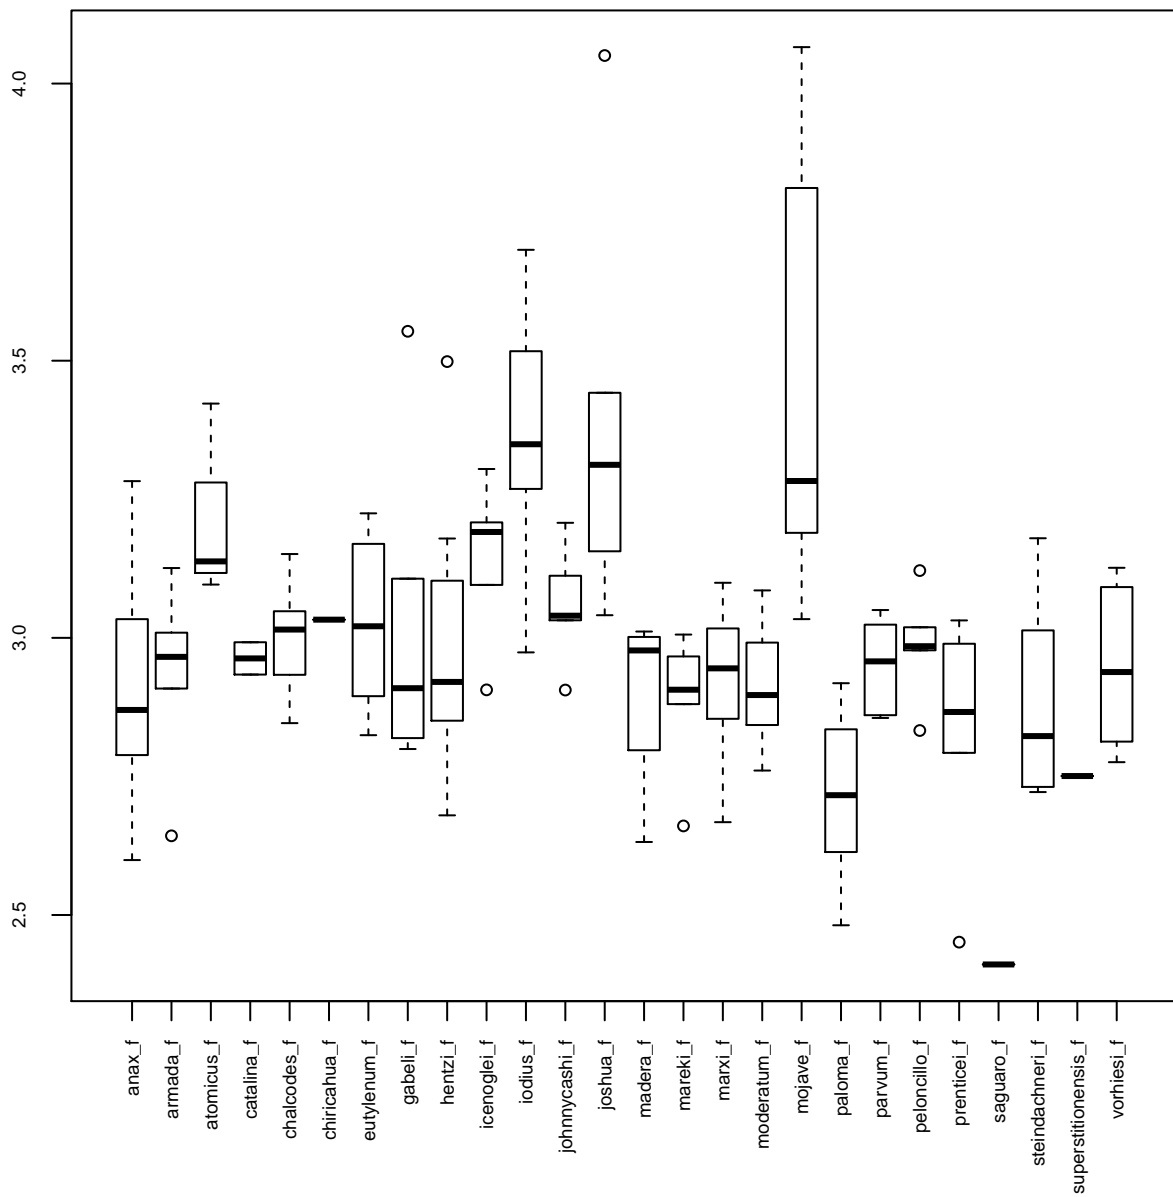

Supplement: Supplementary file 728

# Patella 1/Tarsus 1 ratio – males

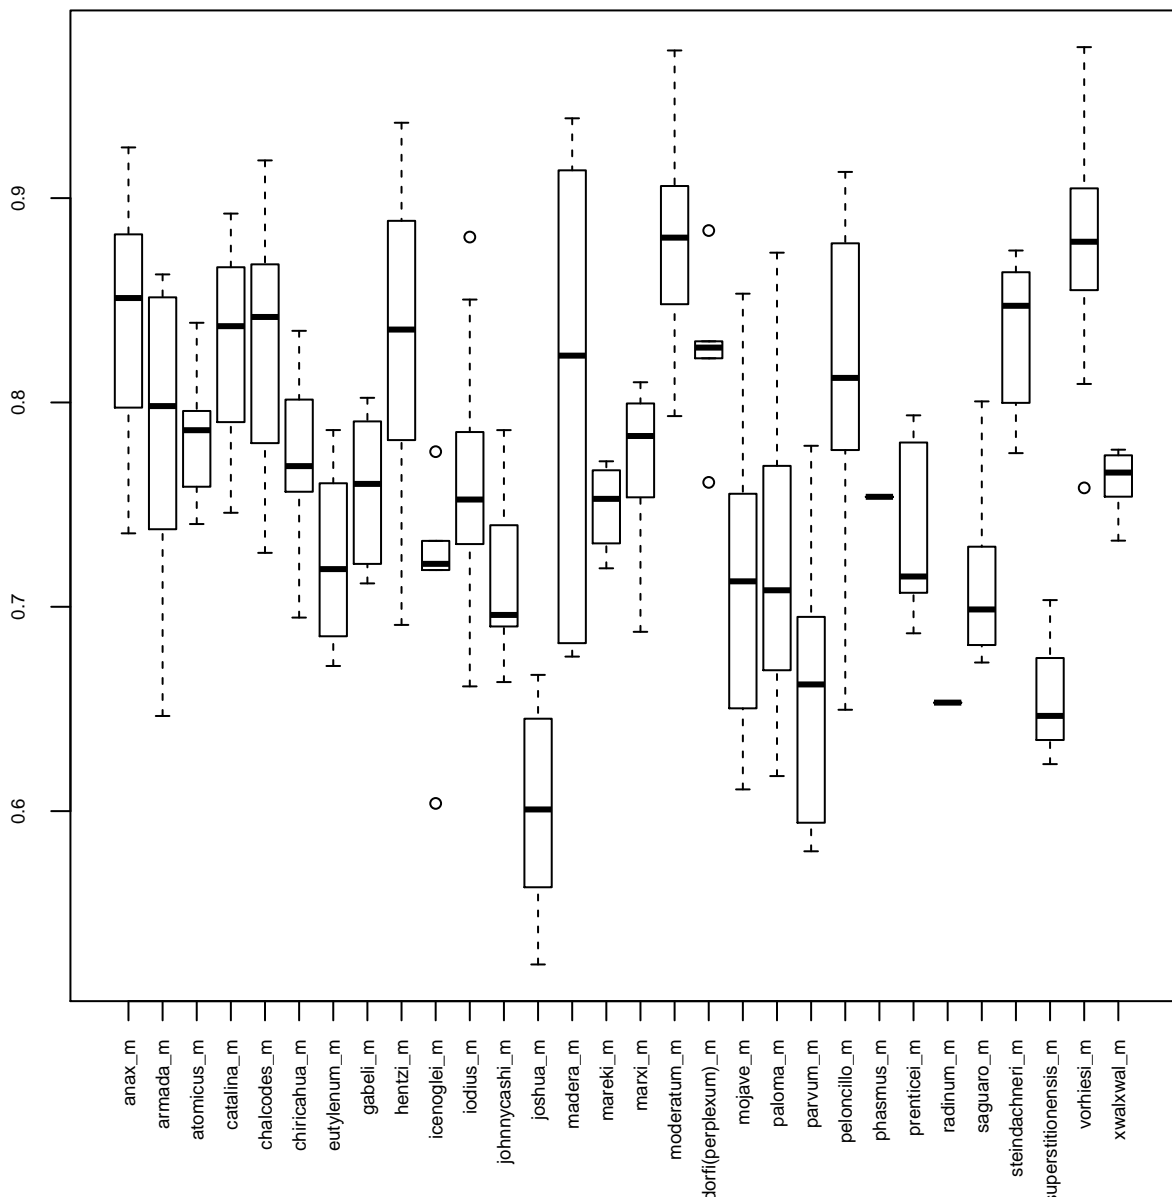

Supplement: Supplementary file 729

Palpal Tibia/Tarsus 4 Length ratio – males

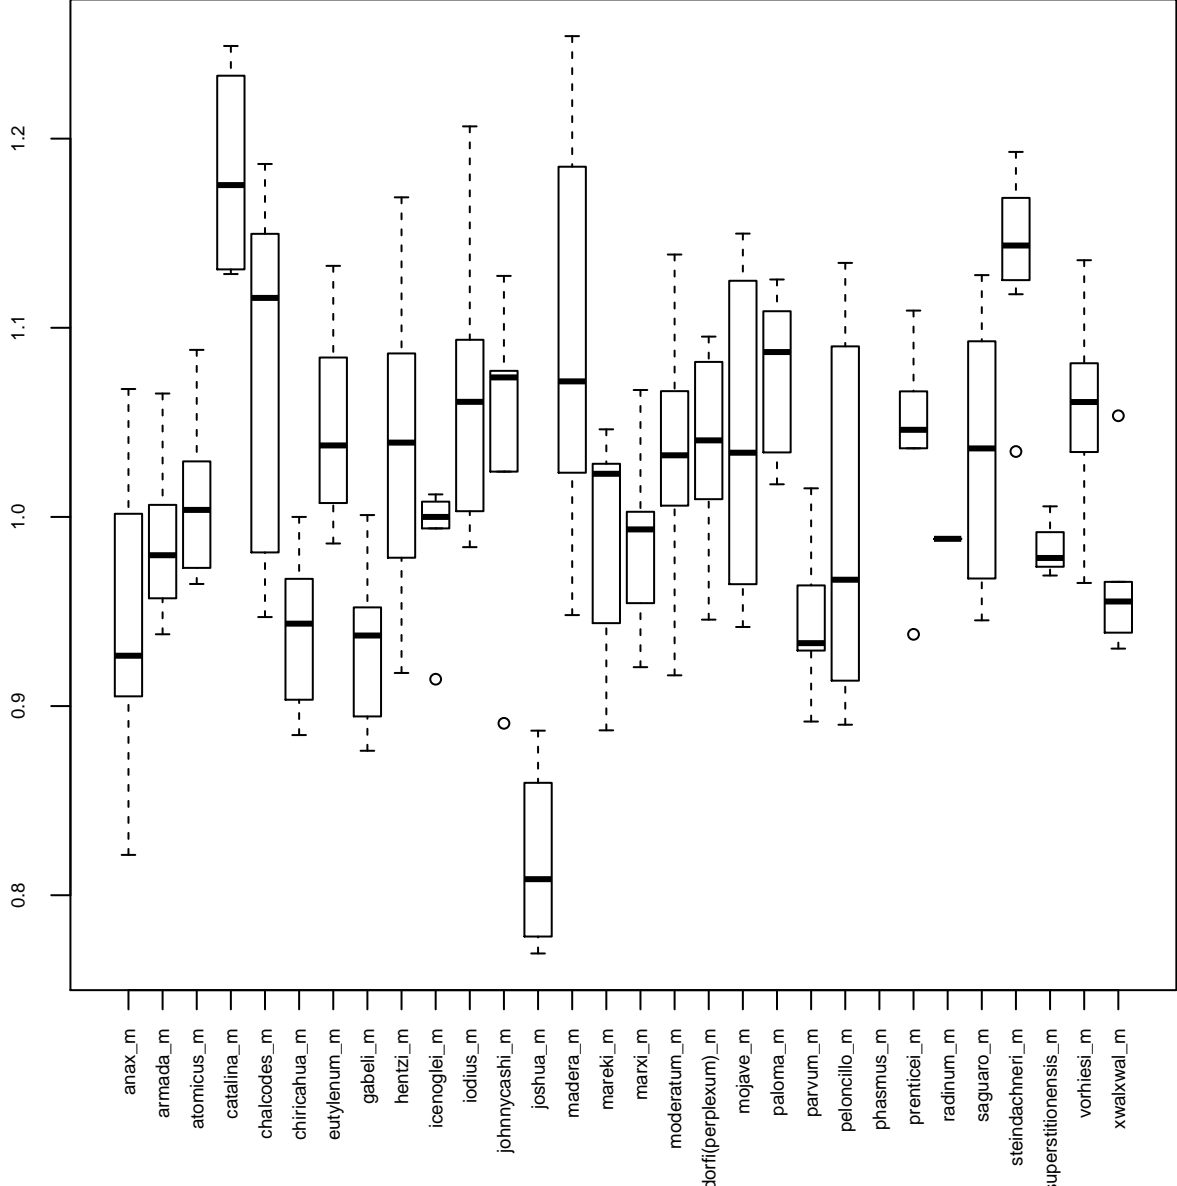

Supplement: Supplementary file 730

## Leg 4 Scopulation ratio – females

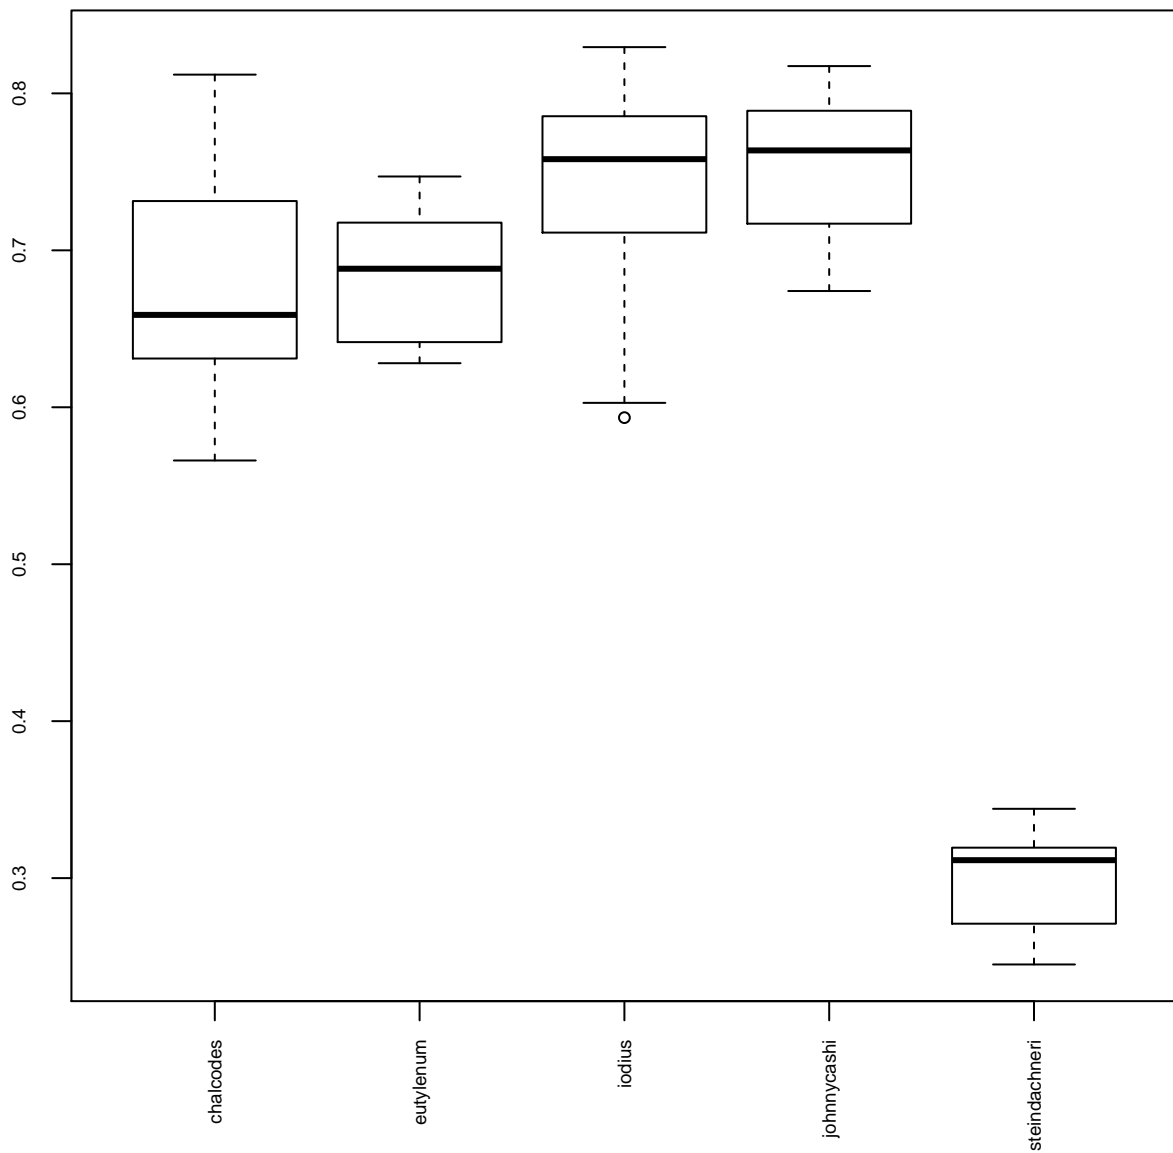

Supplement: Supplementary file 731

### Leg 3 Scopulation ratio – males

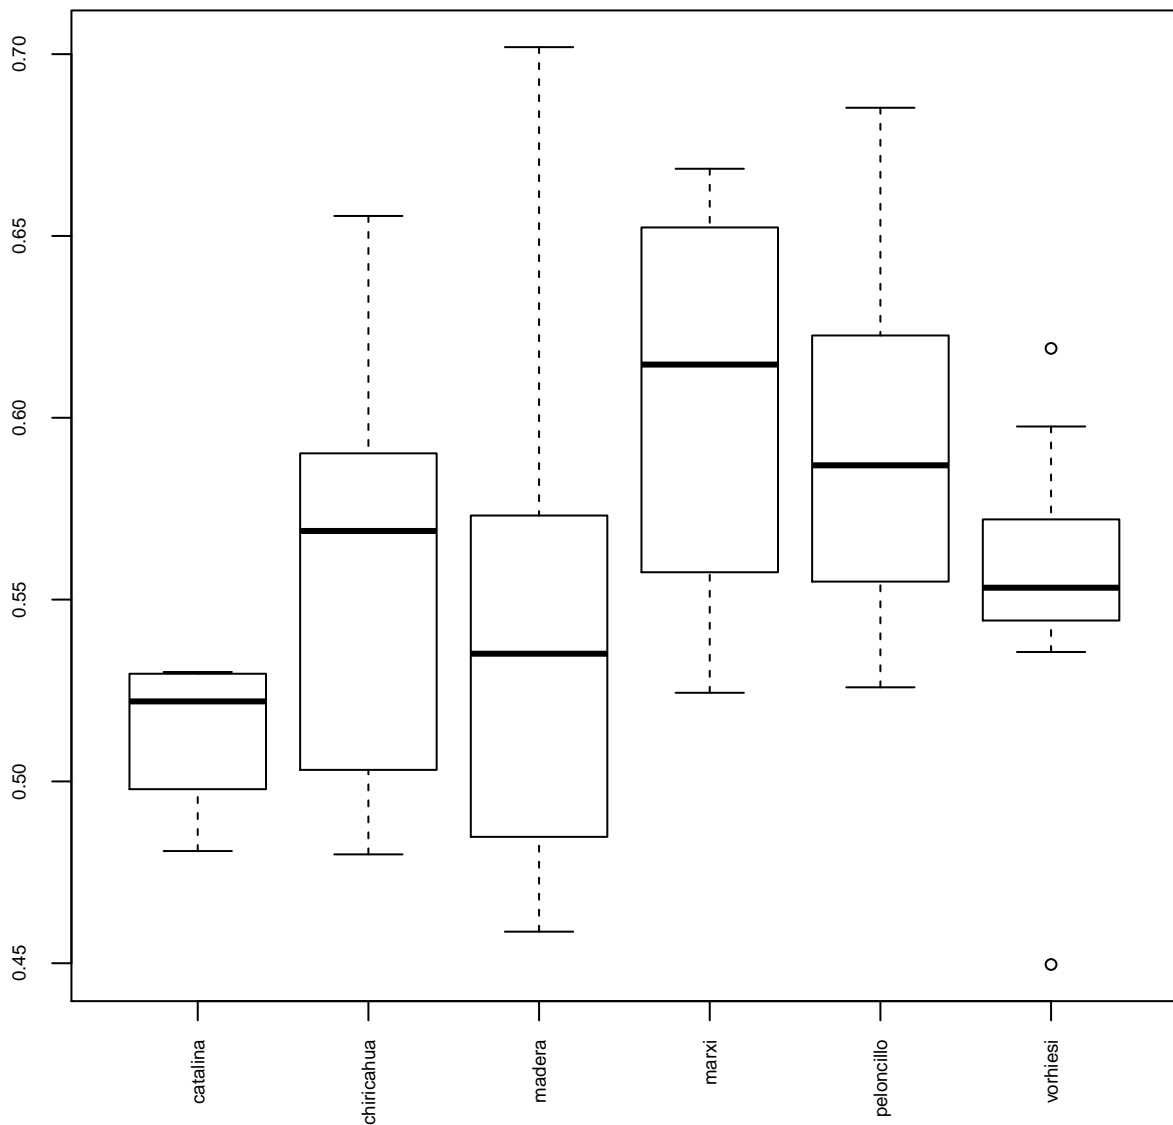

Supplement: Supplementary file 732

## Carapace Length/Femur 4 ratio – females

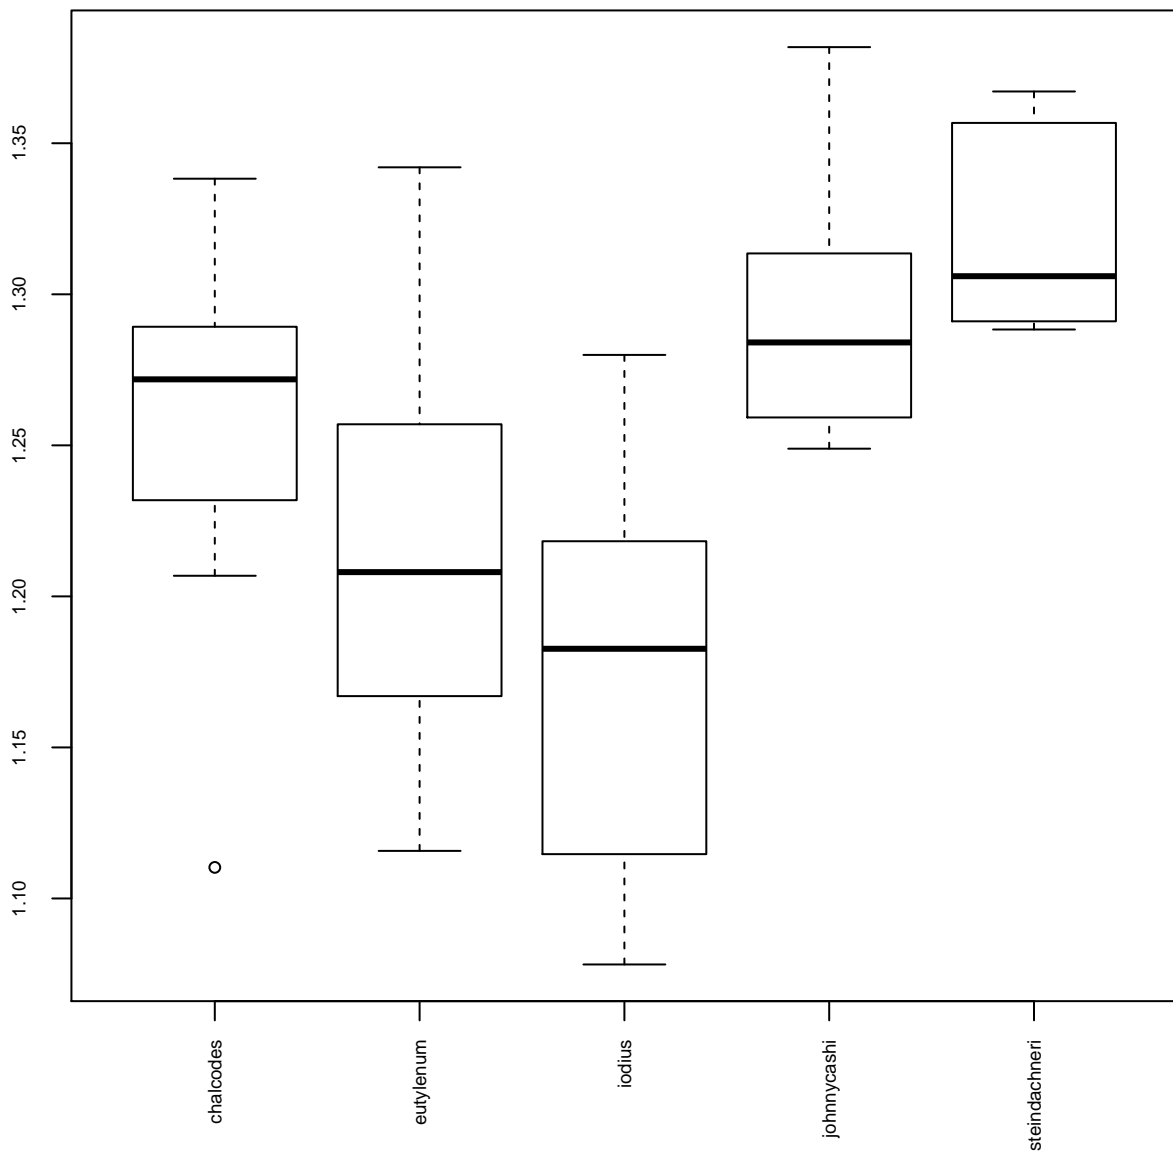

Supplement: Supplementary file 733

# Patella 1/Metatarsus 4 Length ratio – males

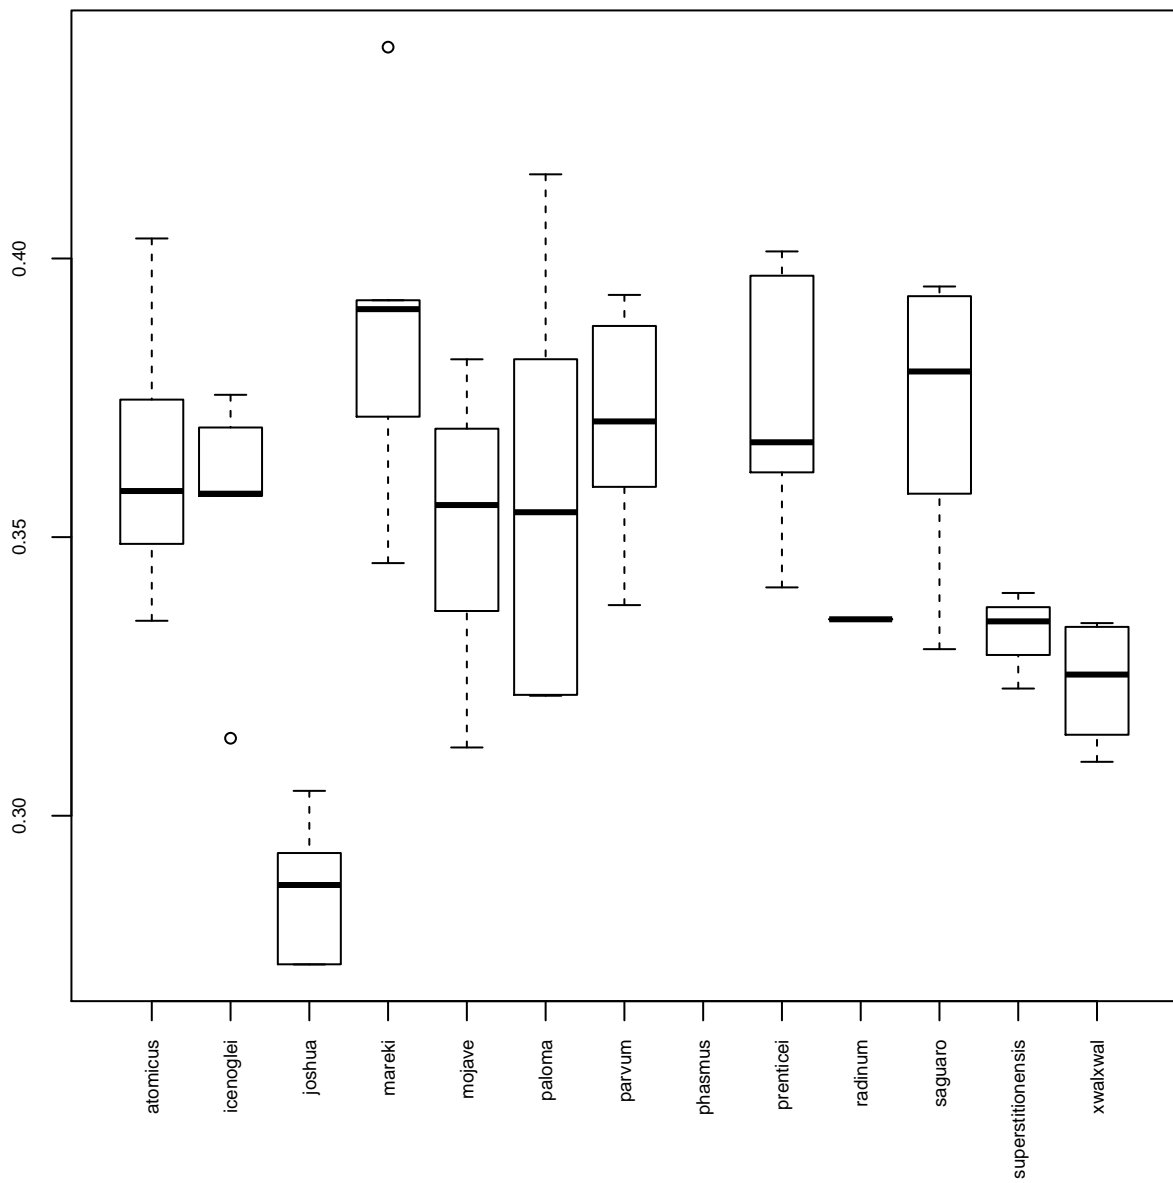

Supplement: Supplementary file 734

## Tibia 3/Patella 4 Length ratio – females

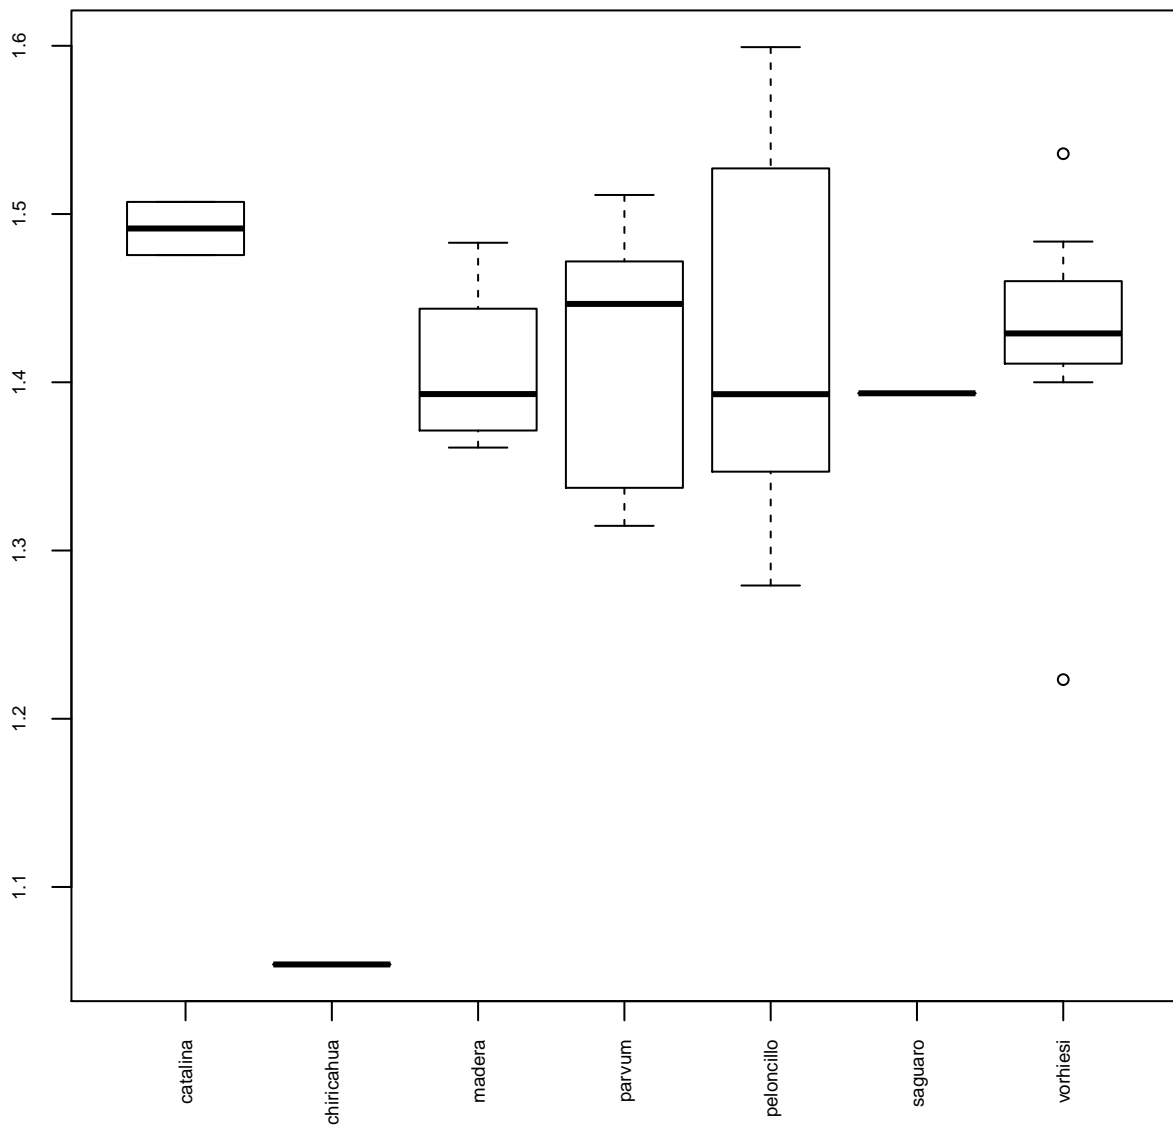

Supplement: Supplementary file 735

## Patella 3/Patella 4 ratio – males

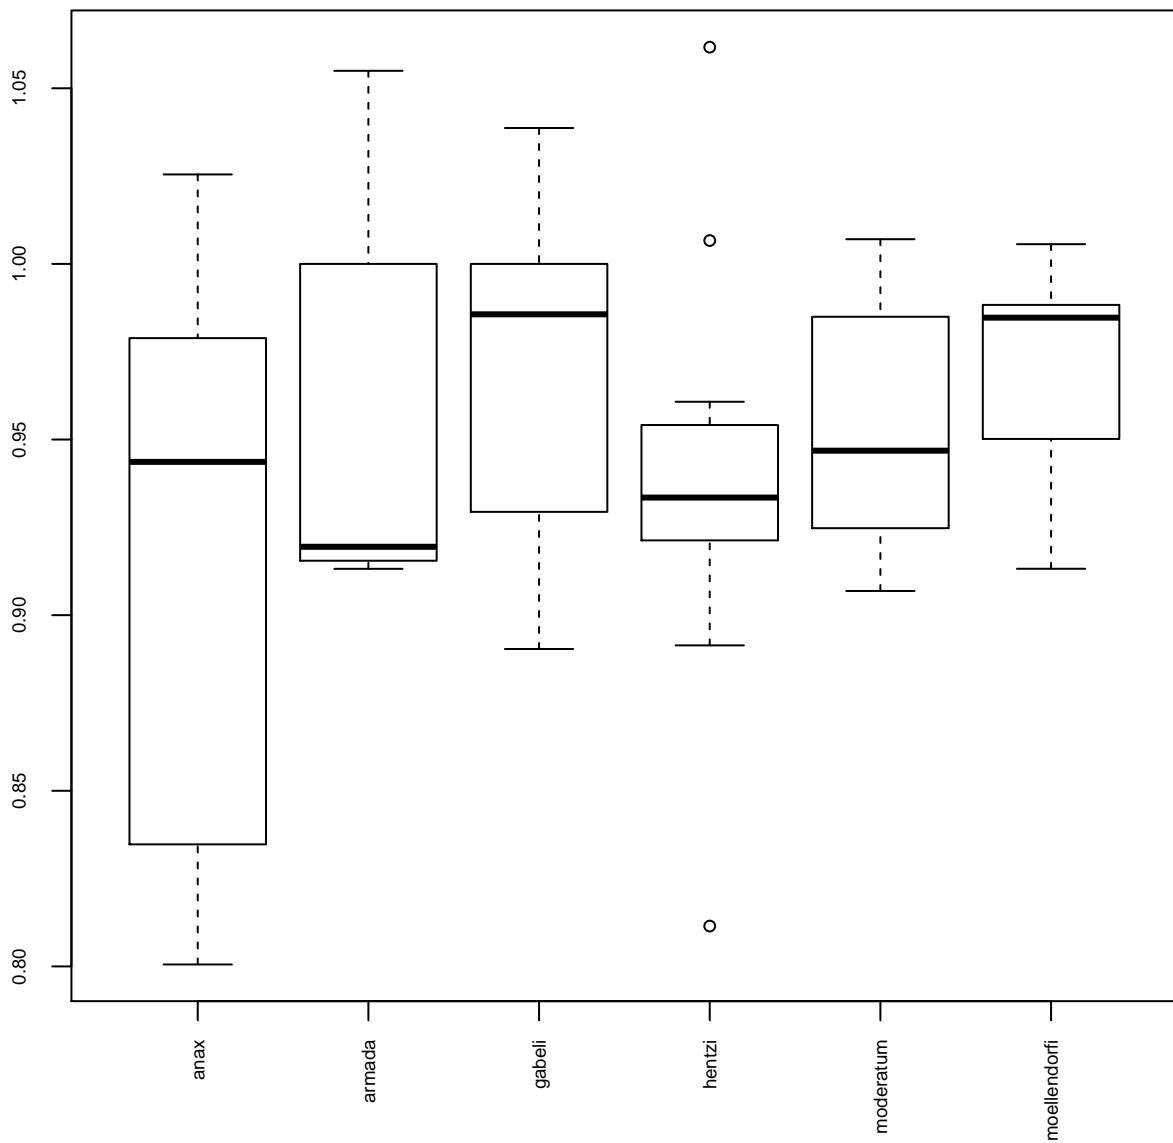

Supplement: Supplementary file 736

# Tibia 3/Tarsus 3 ratio – males

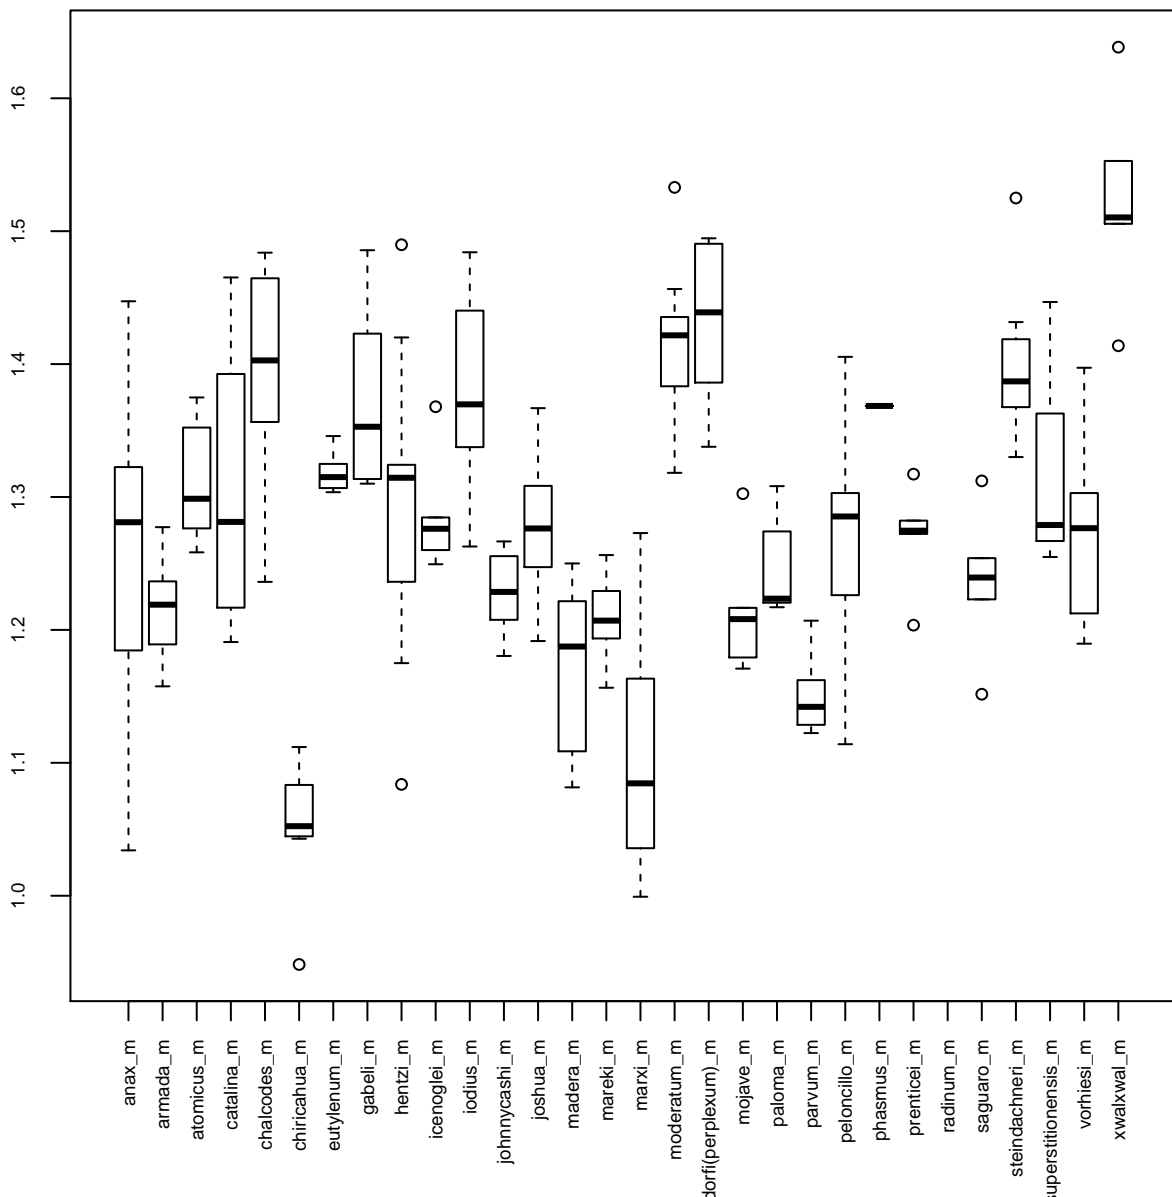

Supplement: Supplementary file 737

## Tarsus 3/Tibia 4 Length ratio – females

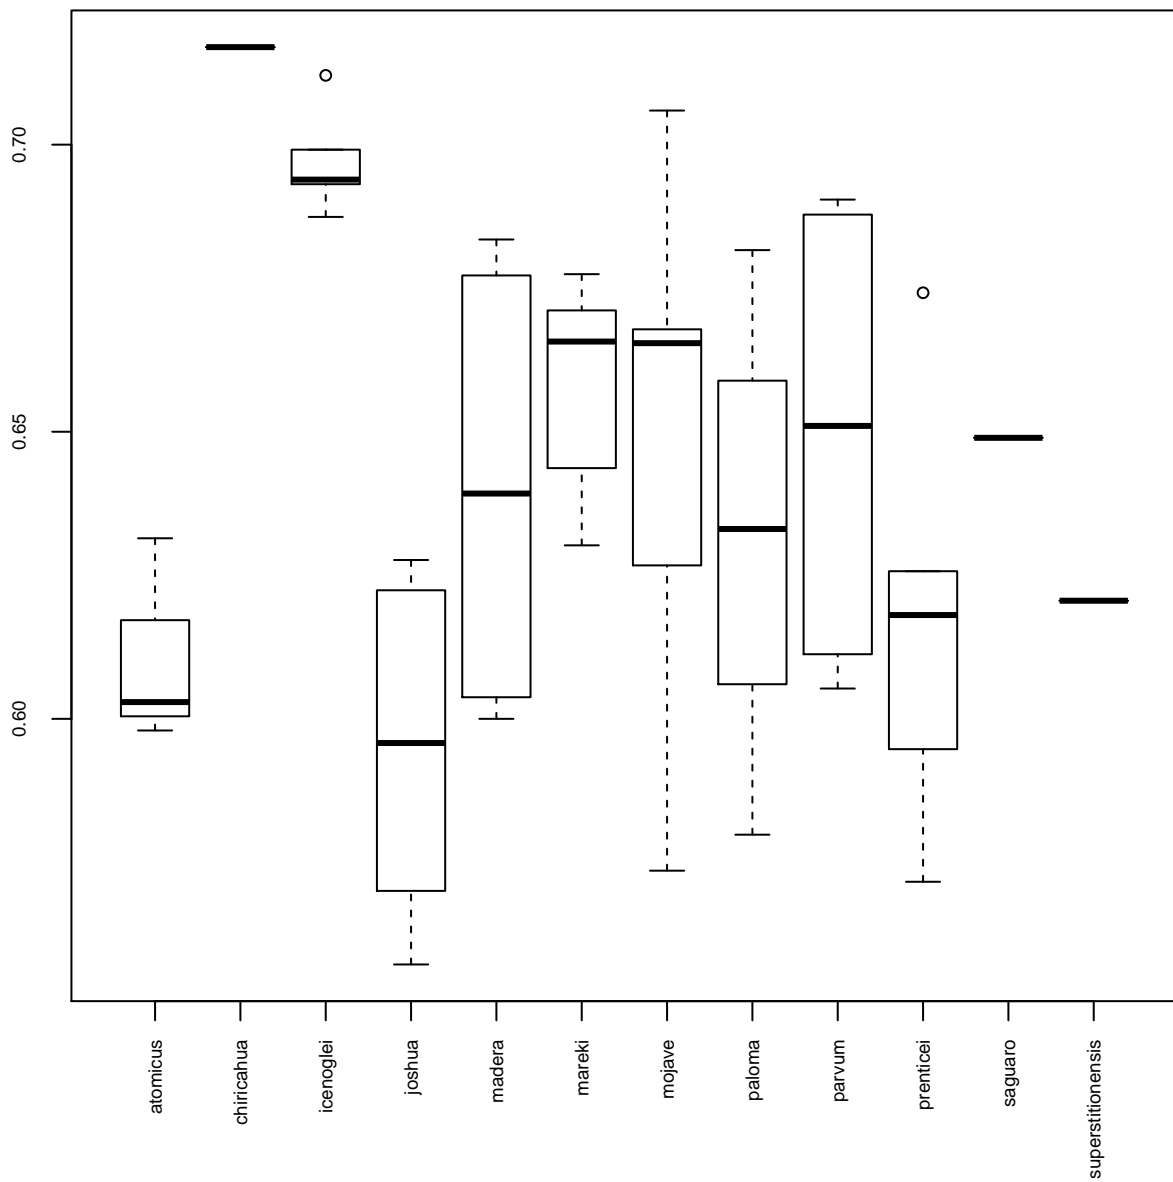

Supplement: Supplementary file 738

## Leg 4 Scopulation ratio – females

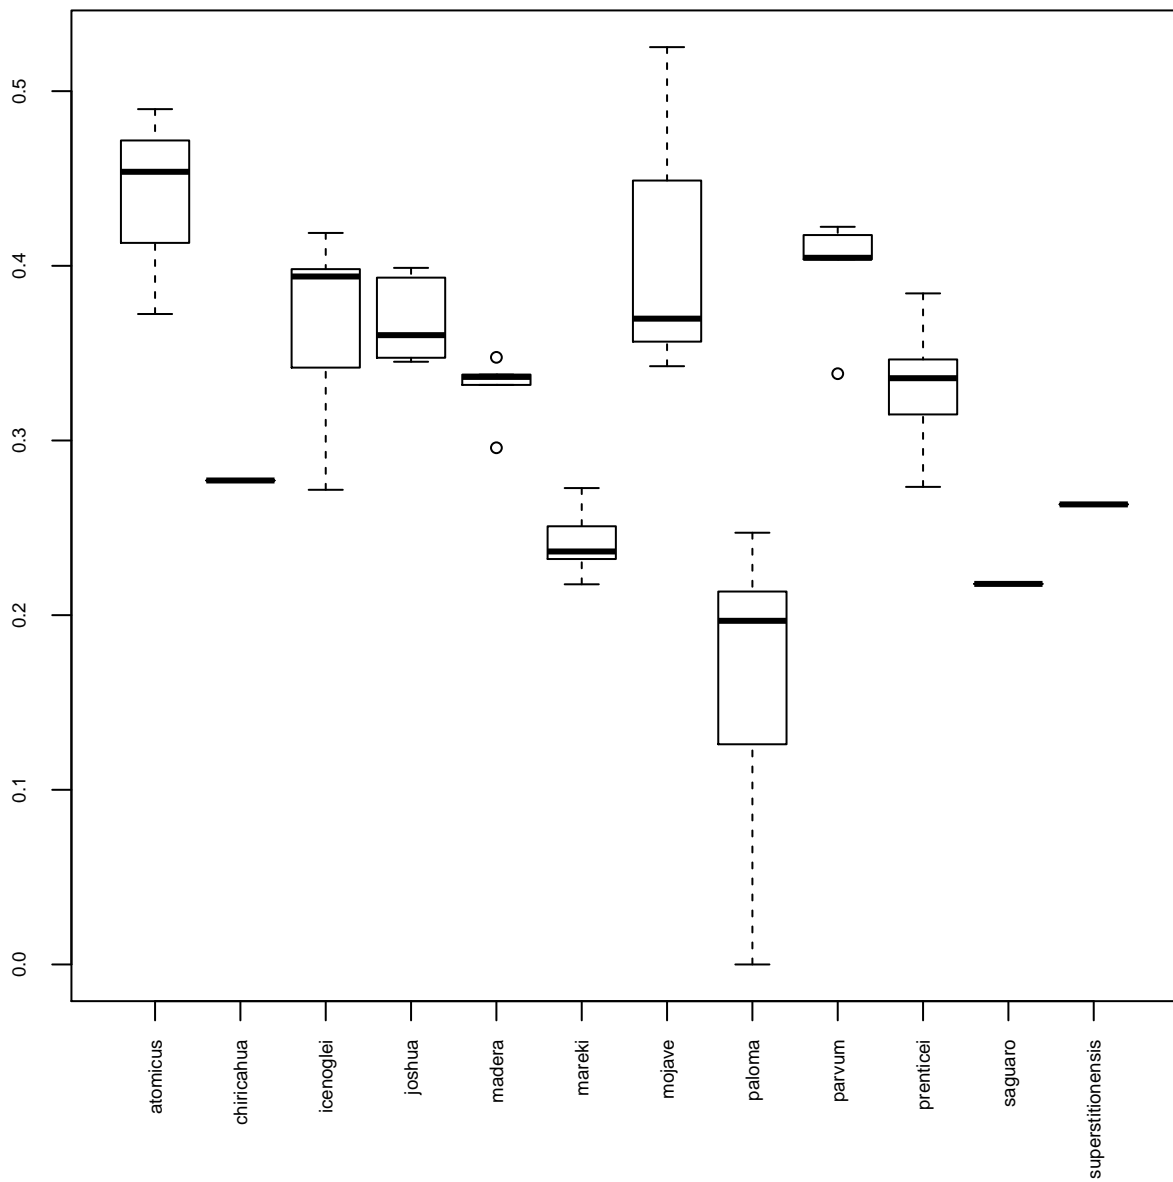

Supplement: Supplementary file 739

## Leg 3 Length – females

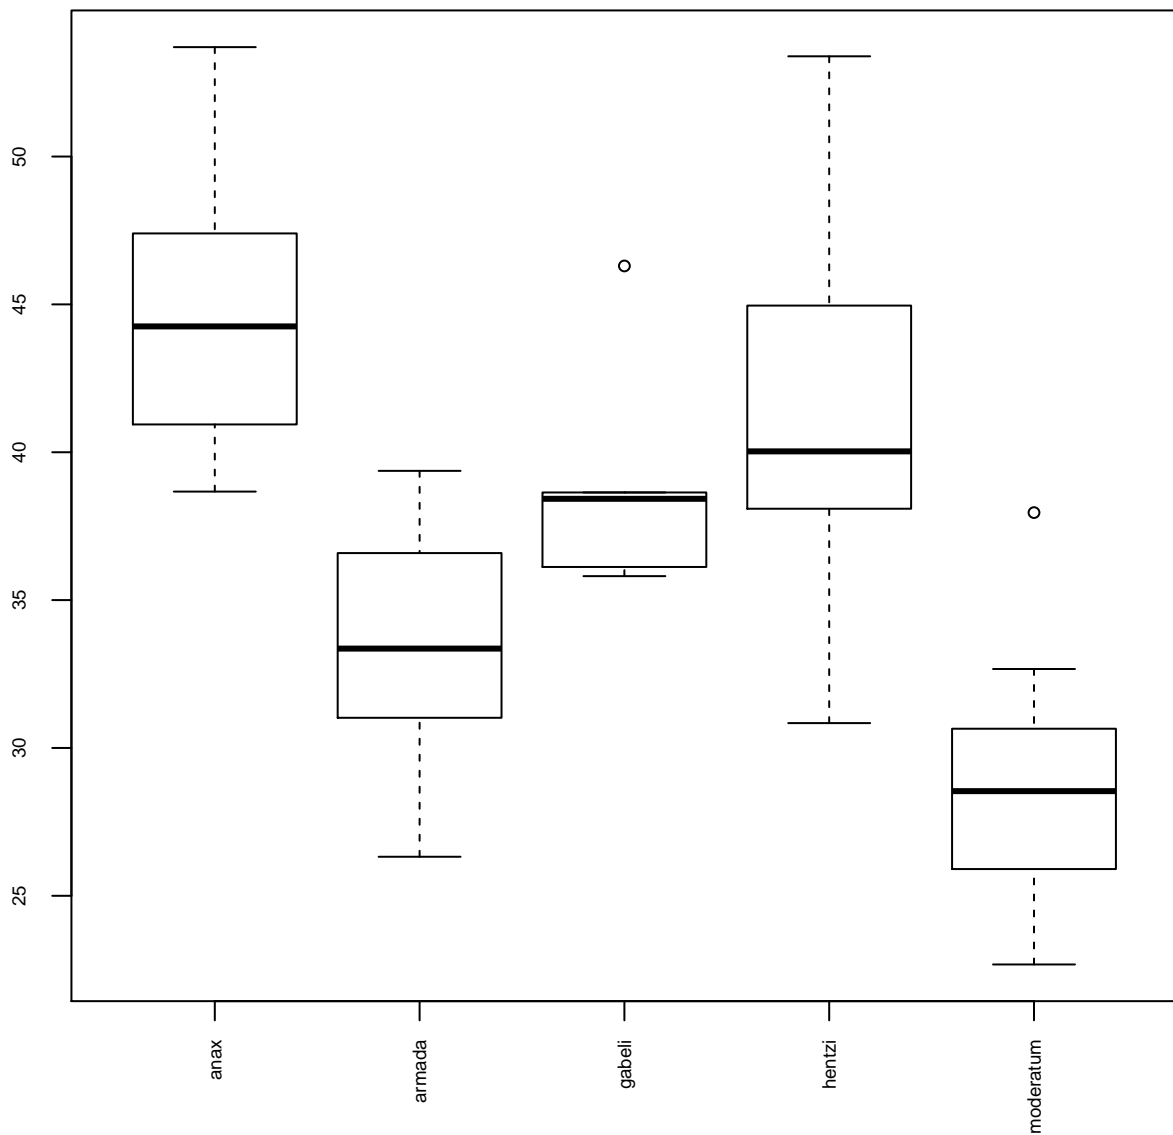

Supplement: Supplementary file 740

# Femur 1/Tarsus 4 ratio – females

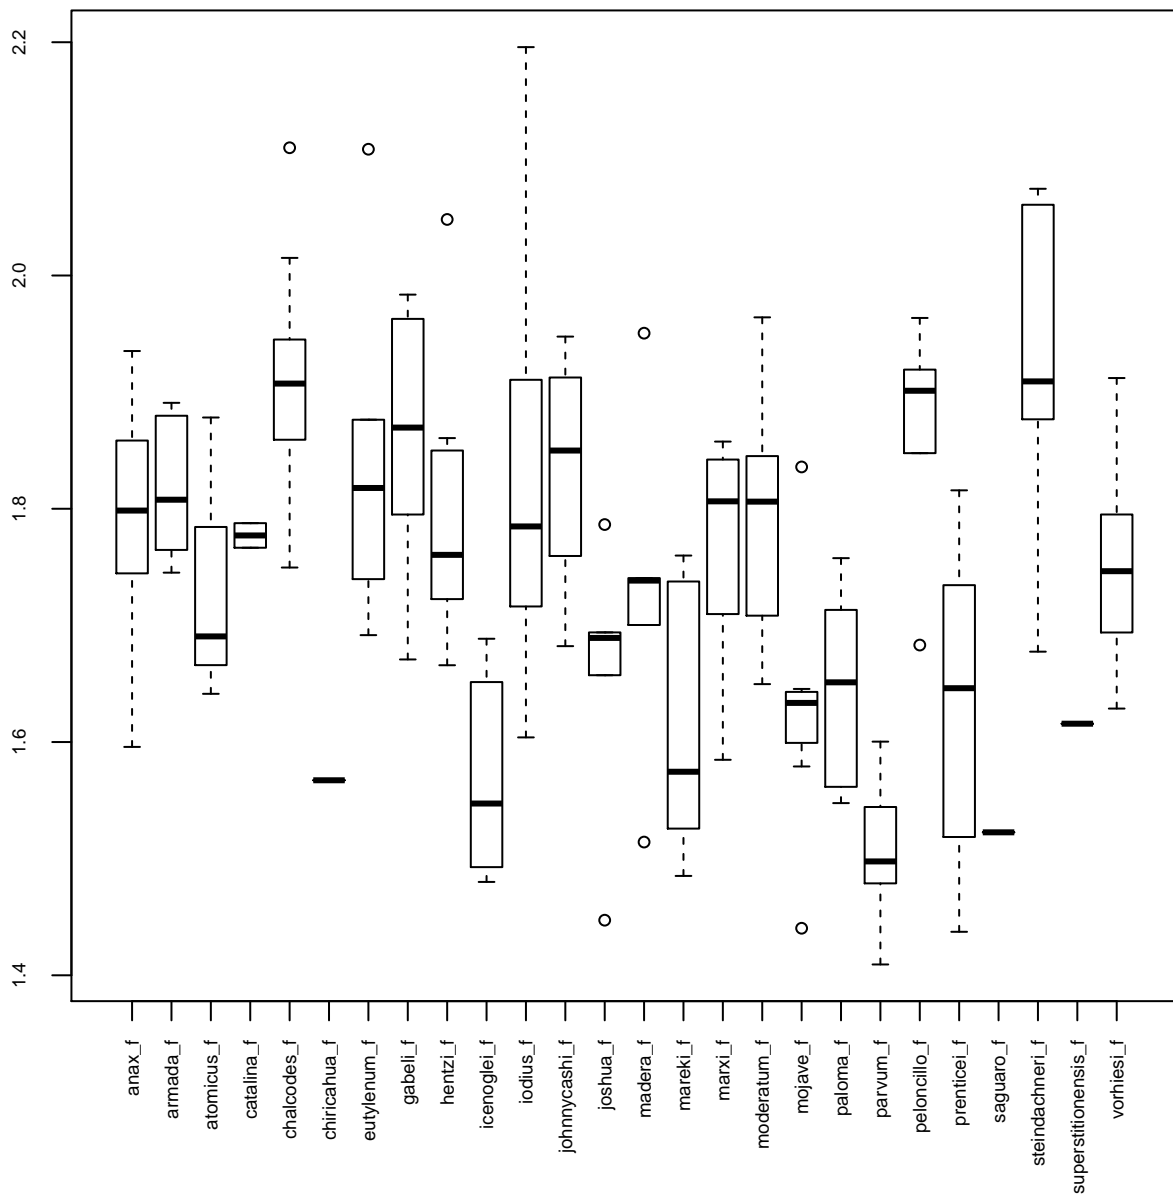

Supplement: Supplementary file 741

## Femur 1/Patella 4 ratio – females

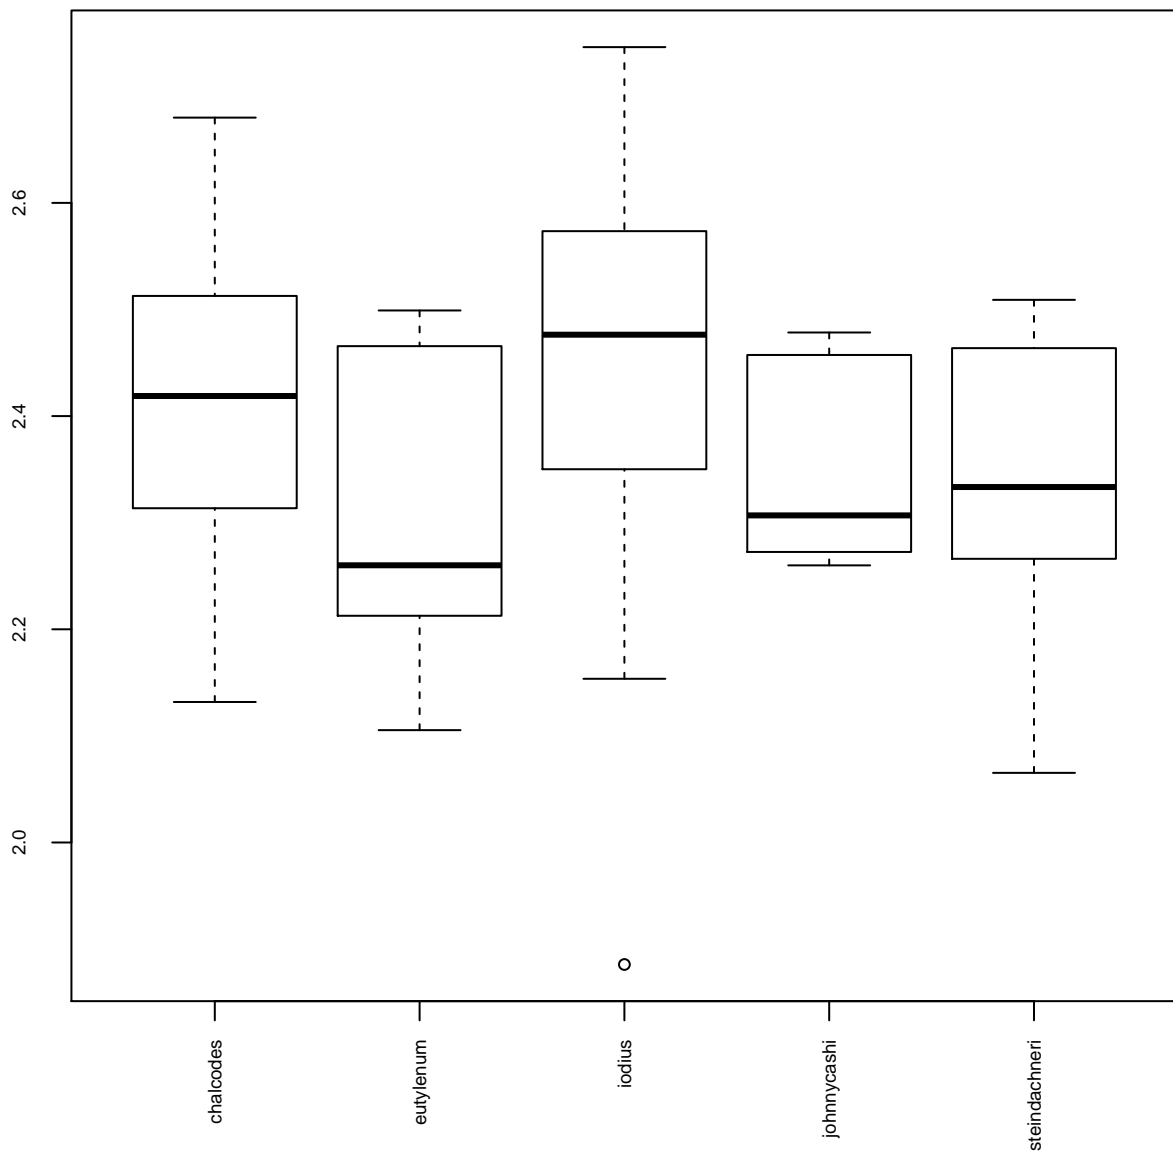

Supplement: Supplementary file 742

## Tibia 1/Tarsus 4 Length ratio – males

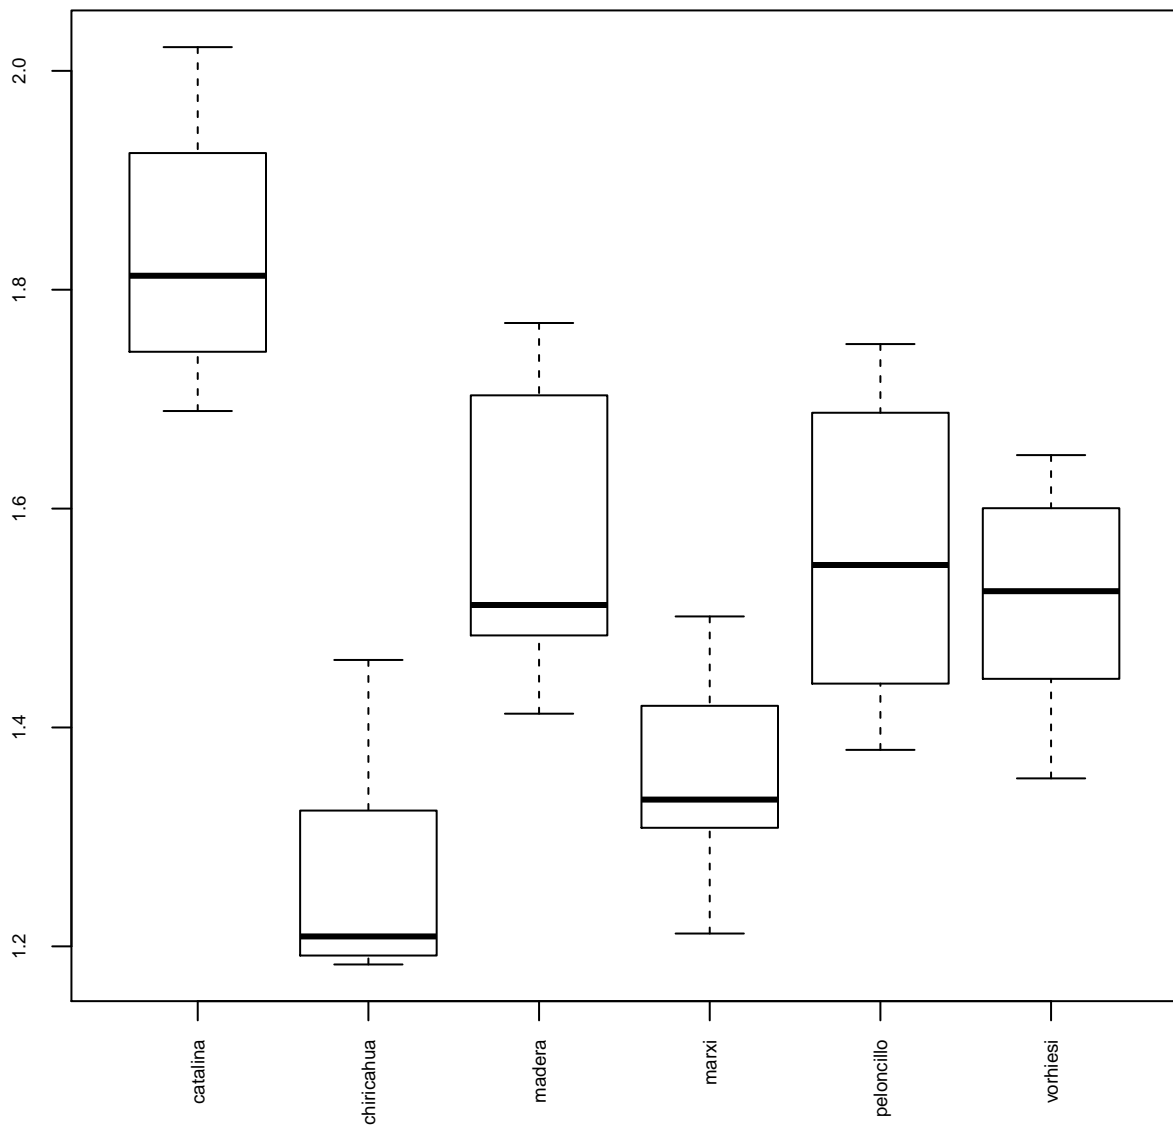

Supplement: Supplementary file 743

## Tibia 1/Tarsus 1 ratio – females

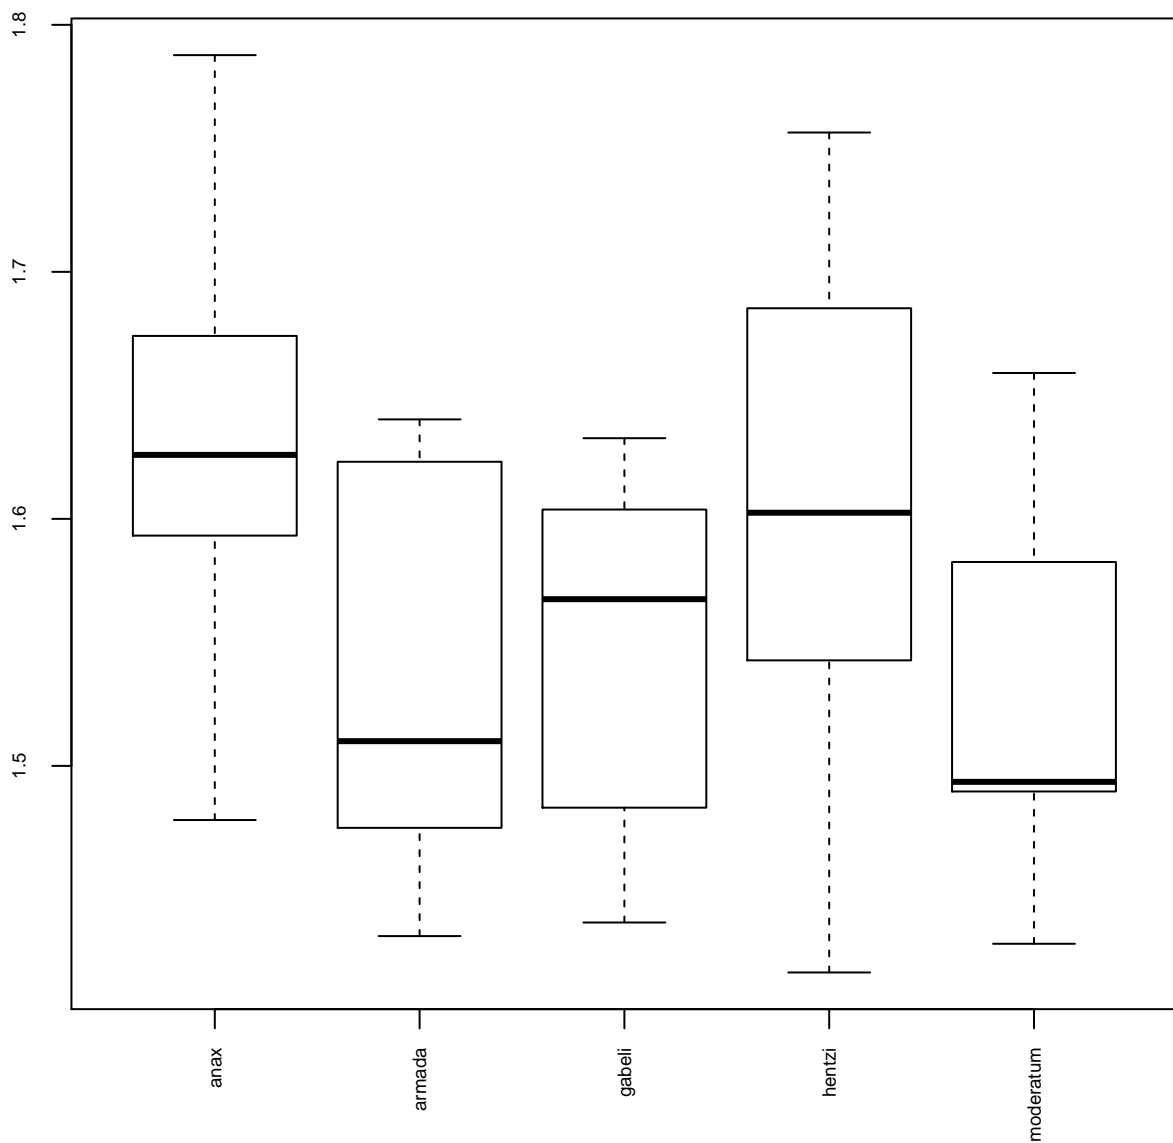

Supplement: Supplementary file 744

## Tibia 3/Metatarsus 3 ratio – males

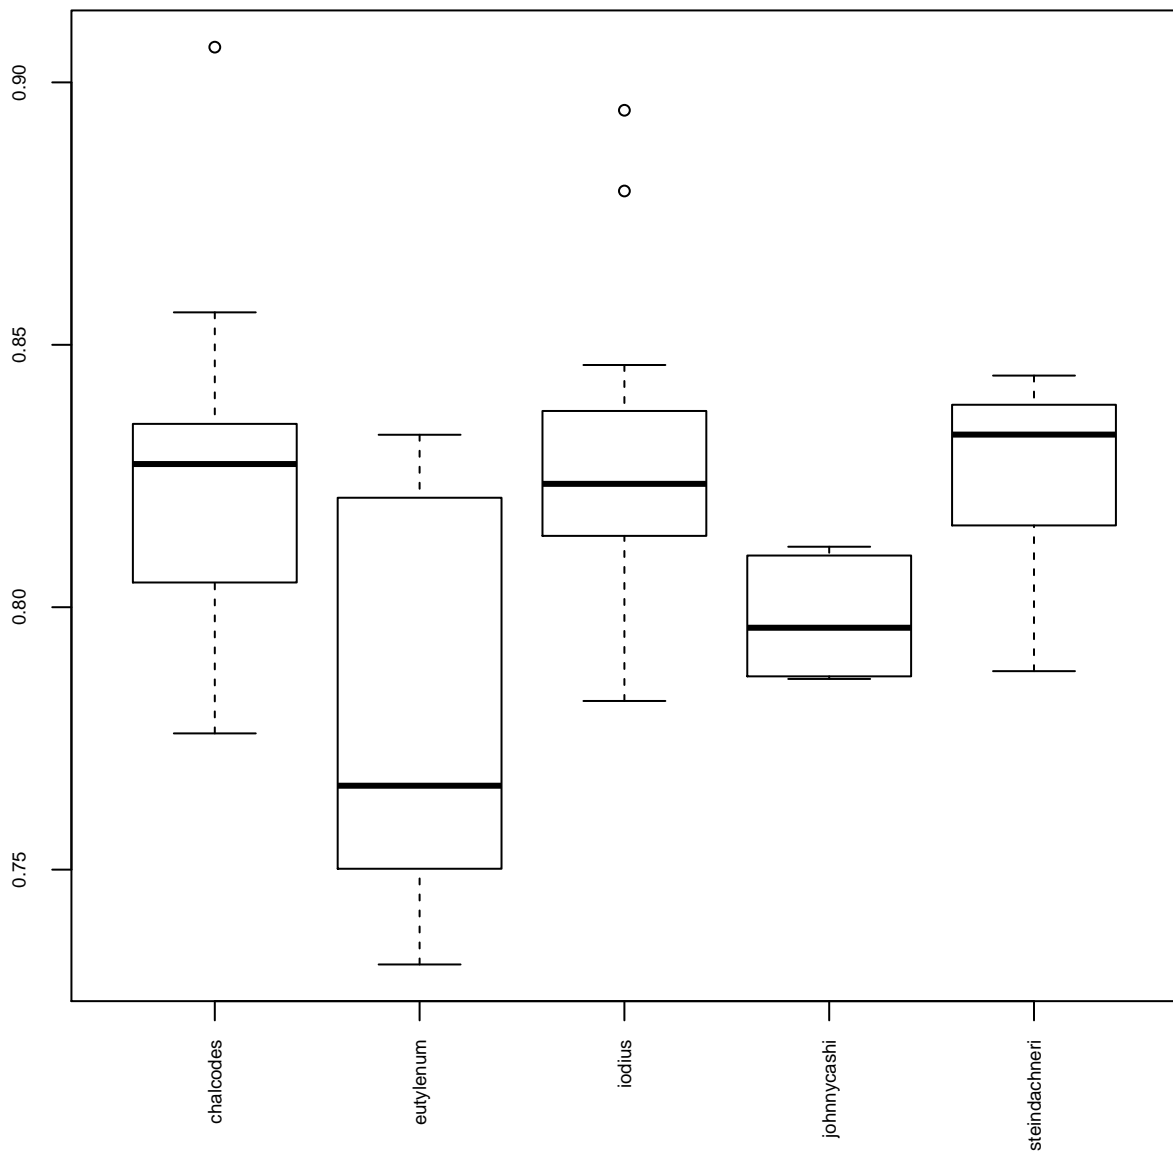

Supplement: Supplementary file 745

## Carapace Length/Tibia 1 ratio – males

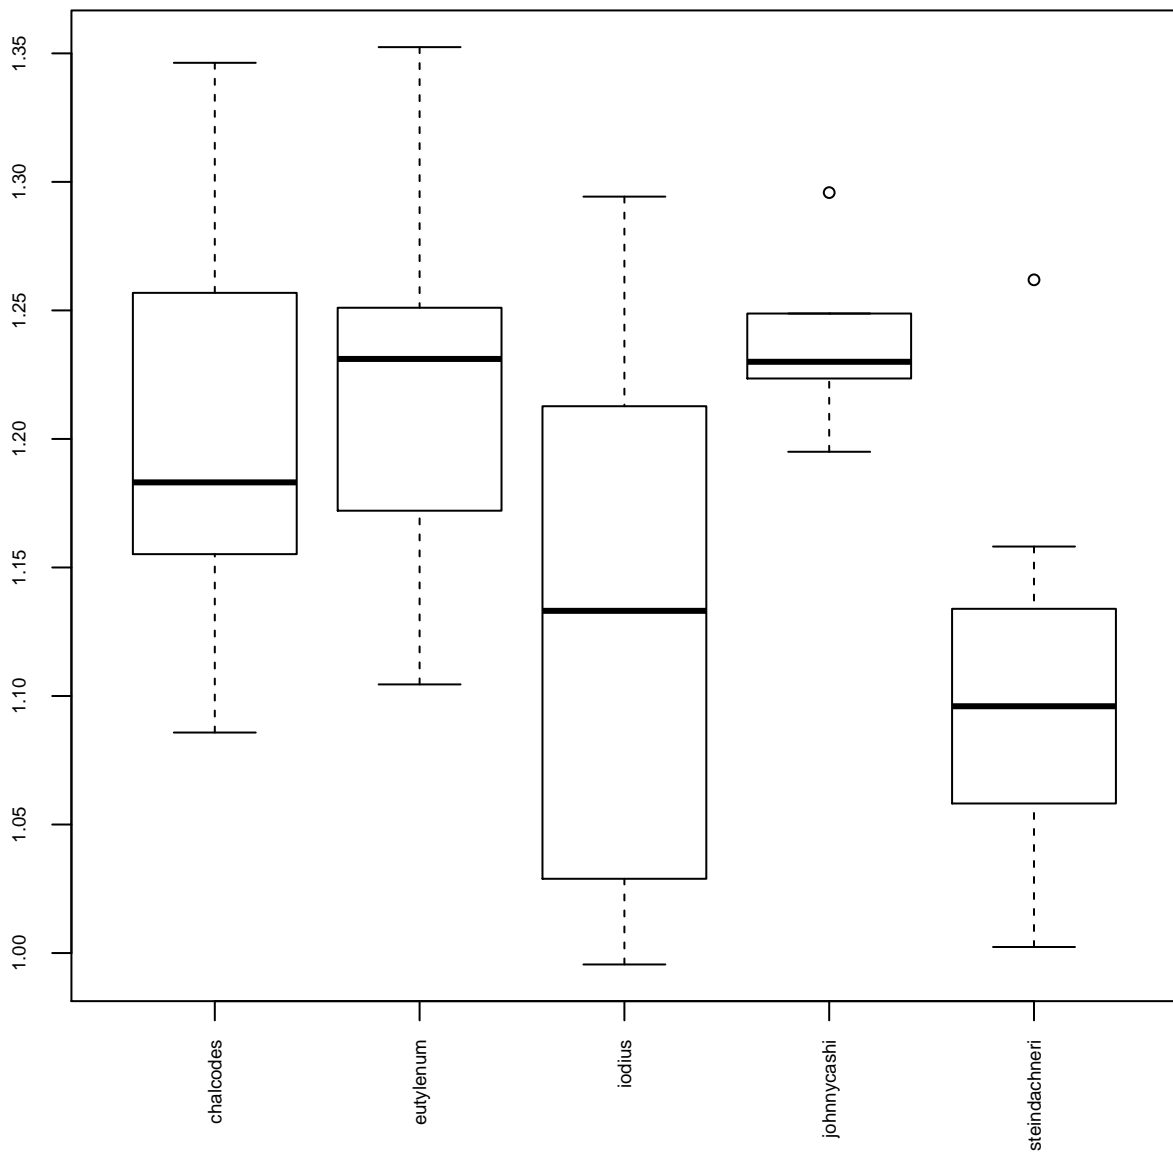

Supplement: Supplementary file 746

## Metatarsus 1/Tarsus 1 ratio – males

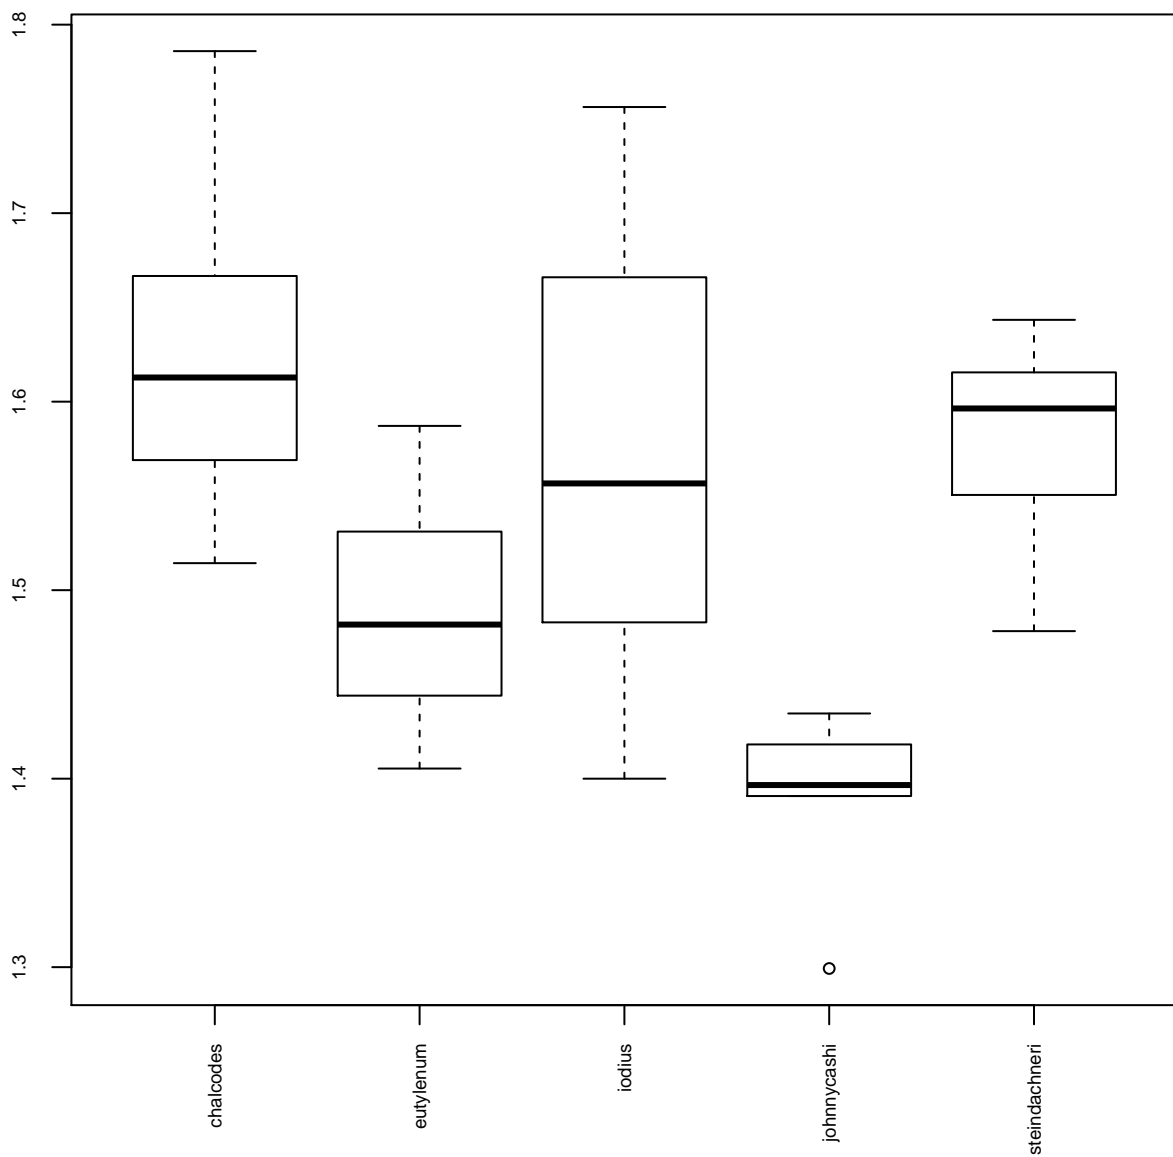

Supplement: Supplementary file 747

## Patella 4/Tibia 4 ratio – females

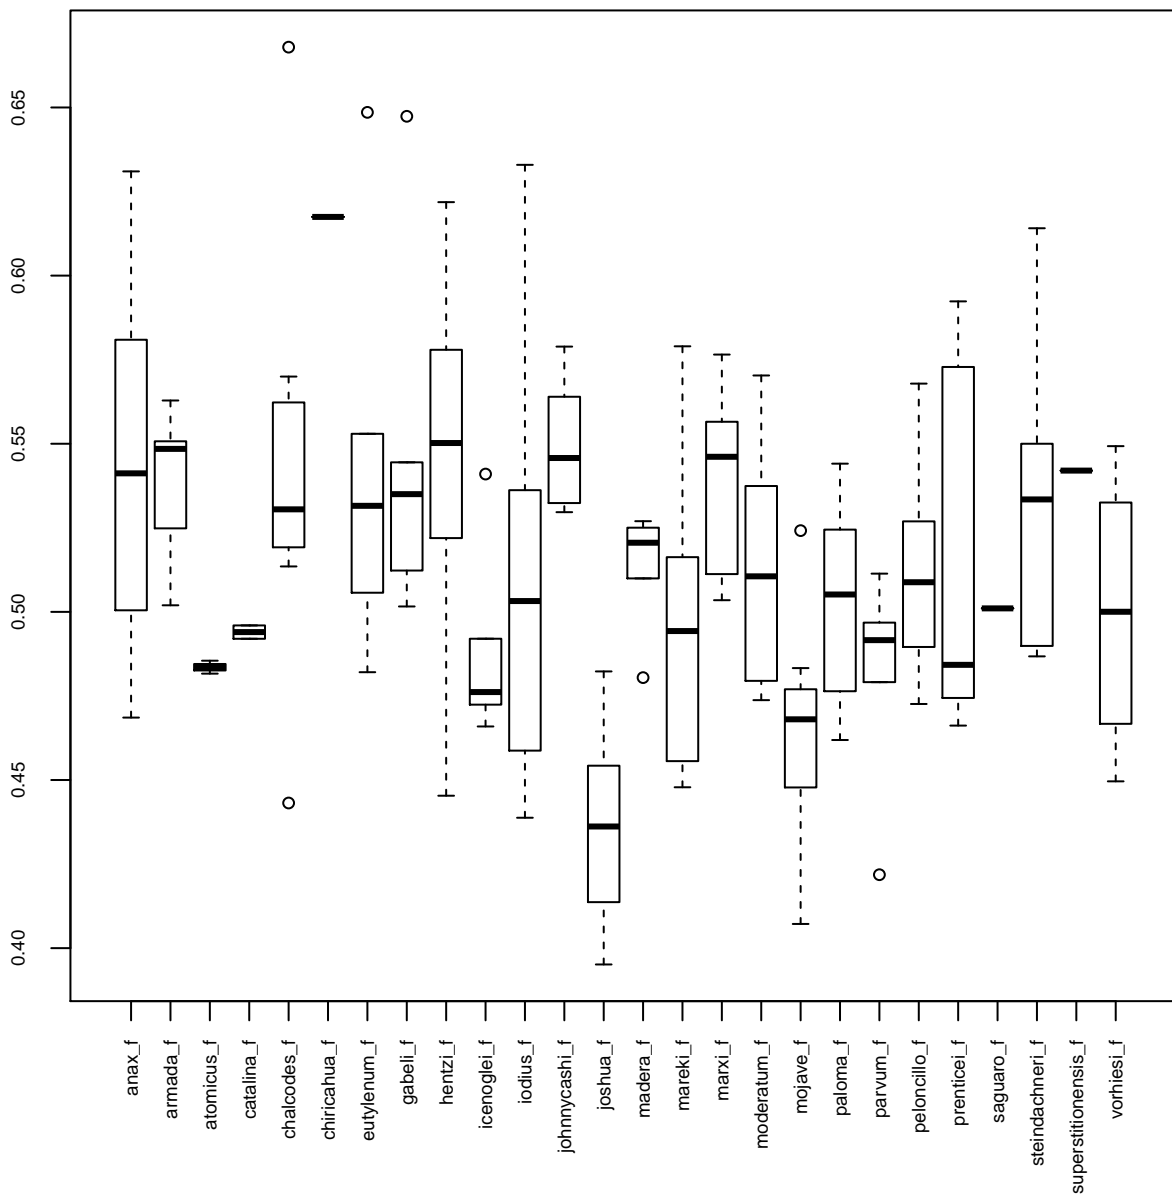

Supplement: Supplementary file 748

## Patella 1/Patella 4 ratio – females

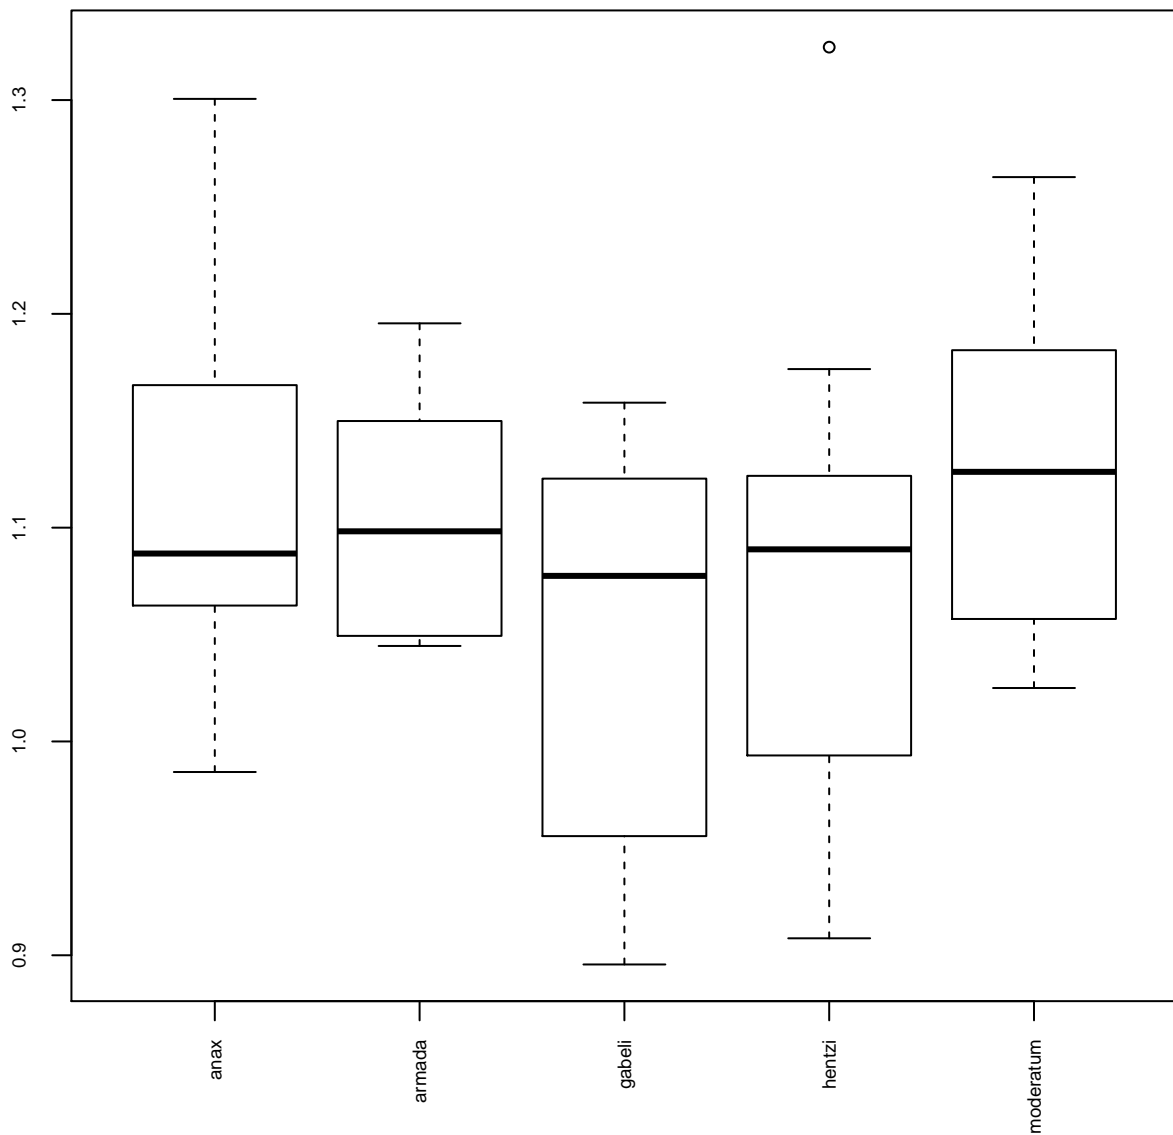

Supplement: Supplementary file 749

## Tarsus 1/Tarsus 4 ratio – females

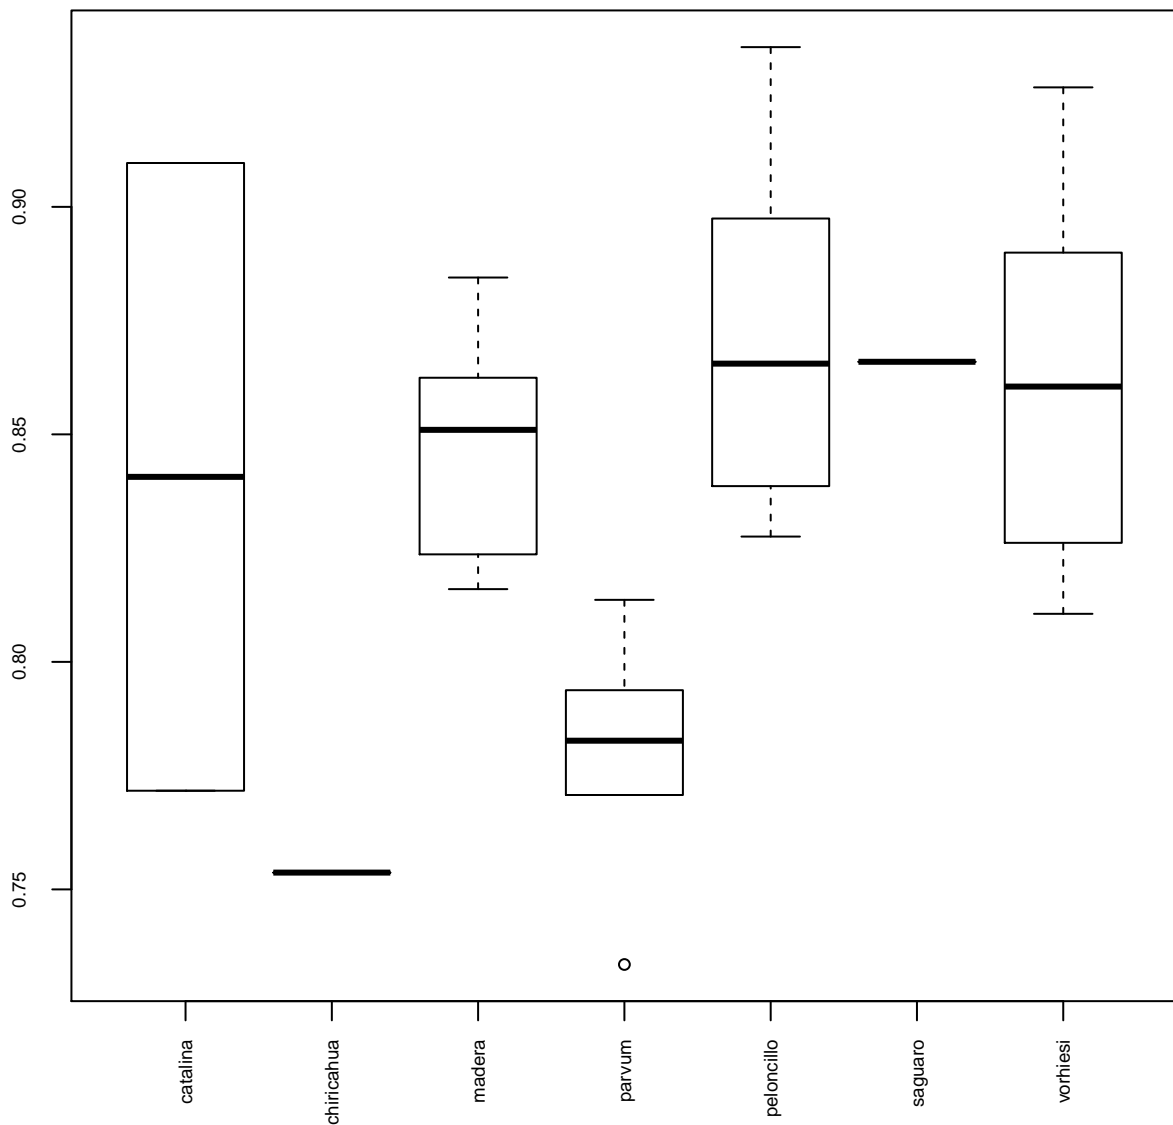

Supplement: Supplementary file 750

## Tarsus 1/Tibia 4 Length ratio – females

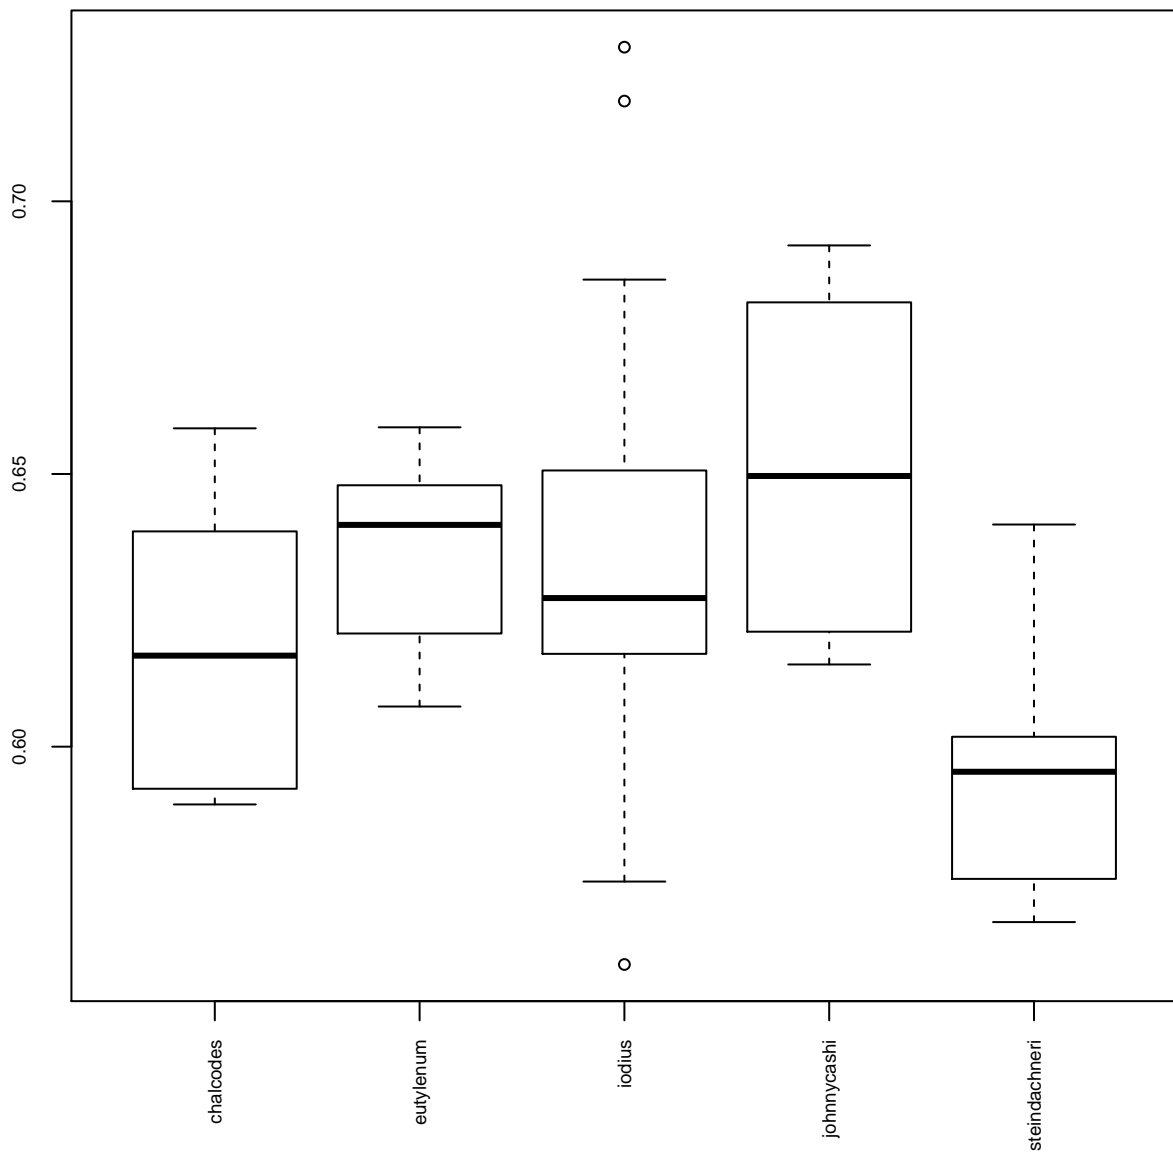

Supplement: Supplementary file 751

## Femur 3/Patella 4 Length ratio – females

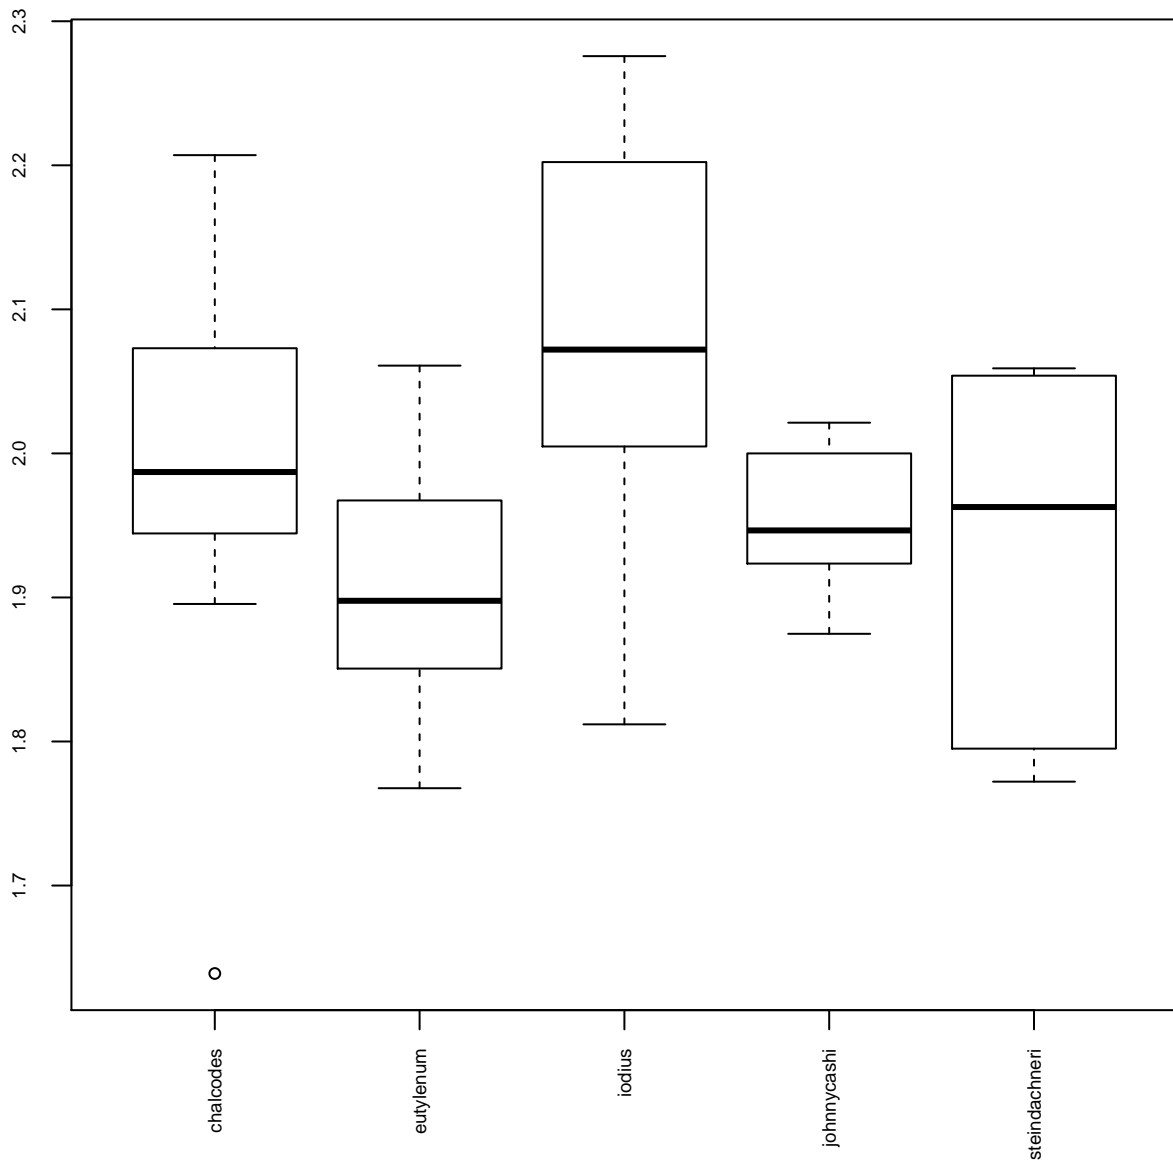

Supplement: Supplementary file 752

## Carapace Length/Femur 3 ratio – females

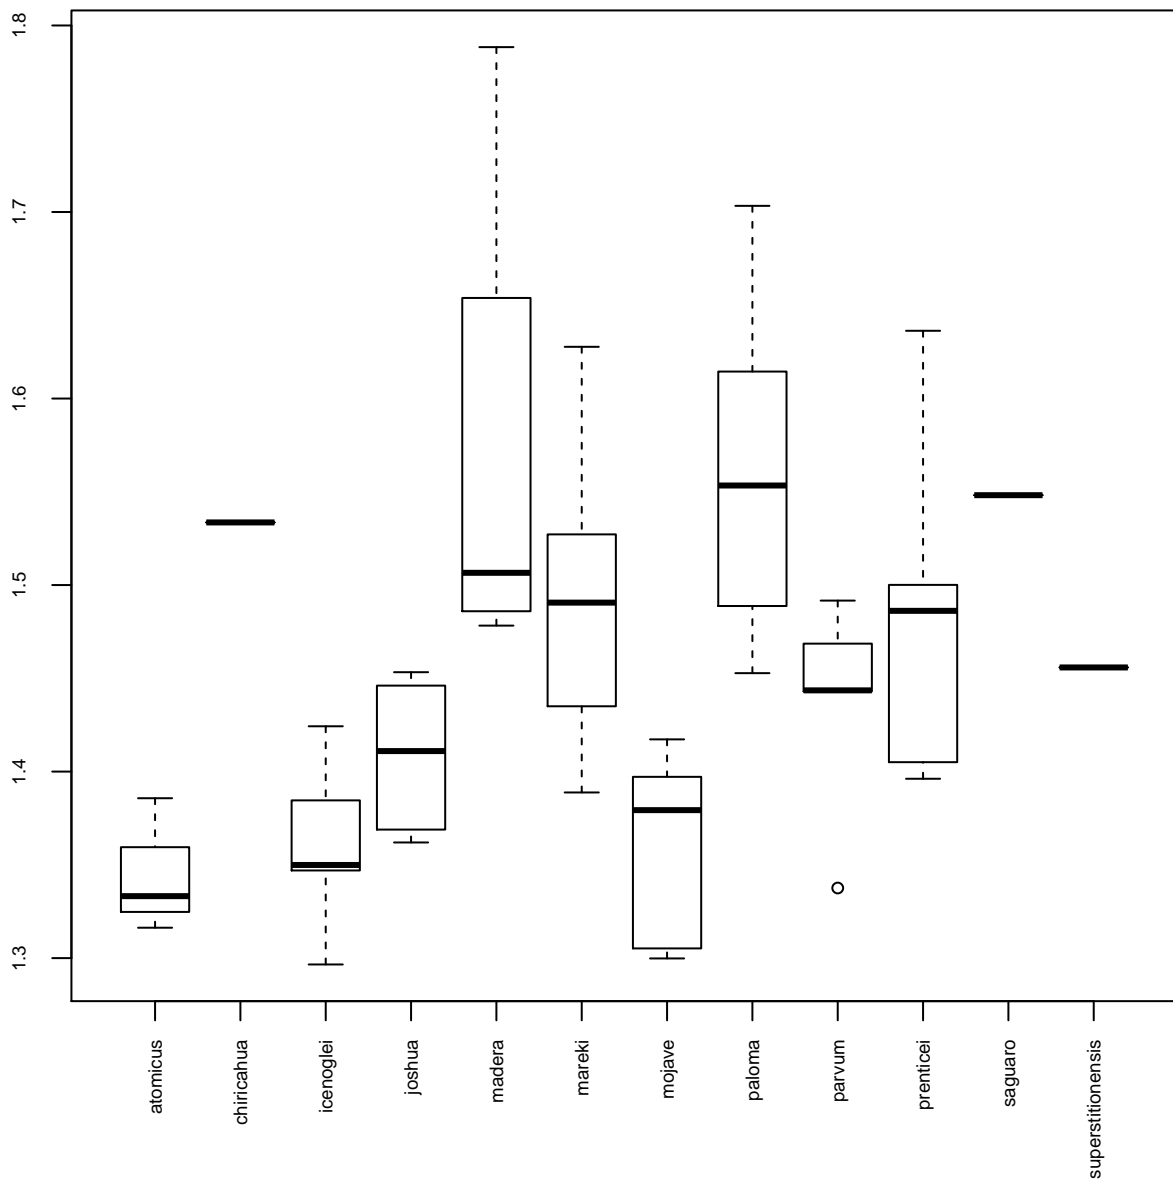

Supplement: Supplementary file 753

# Metatarsus 1/Tibia 4 Length ratio – males

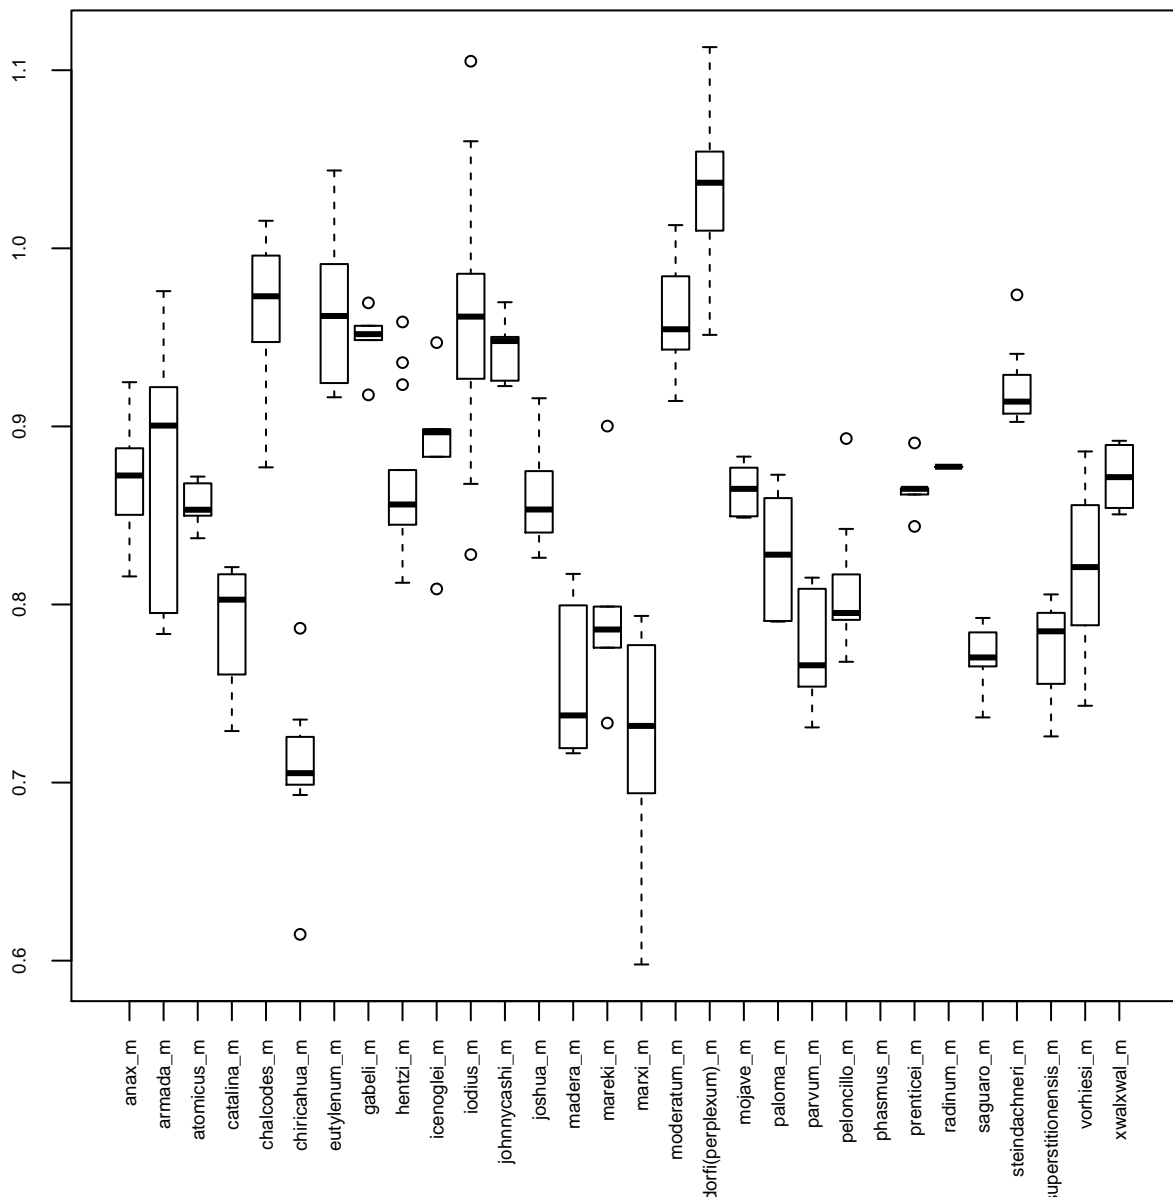

Supplement: Supplementary file 754

## Carapace Length/Tarsus 4 ratio – females

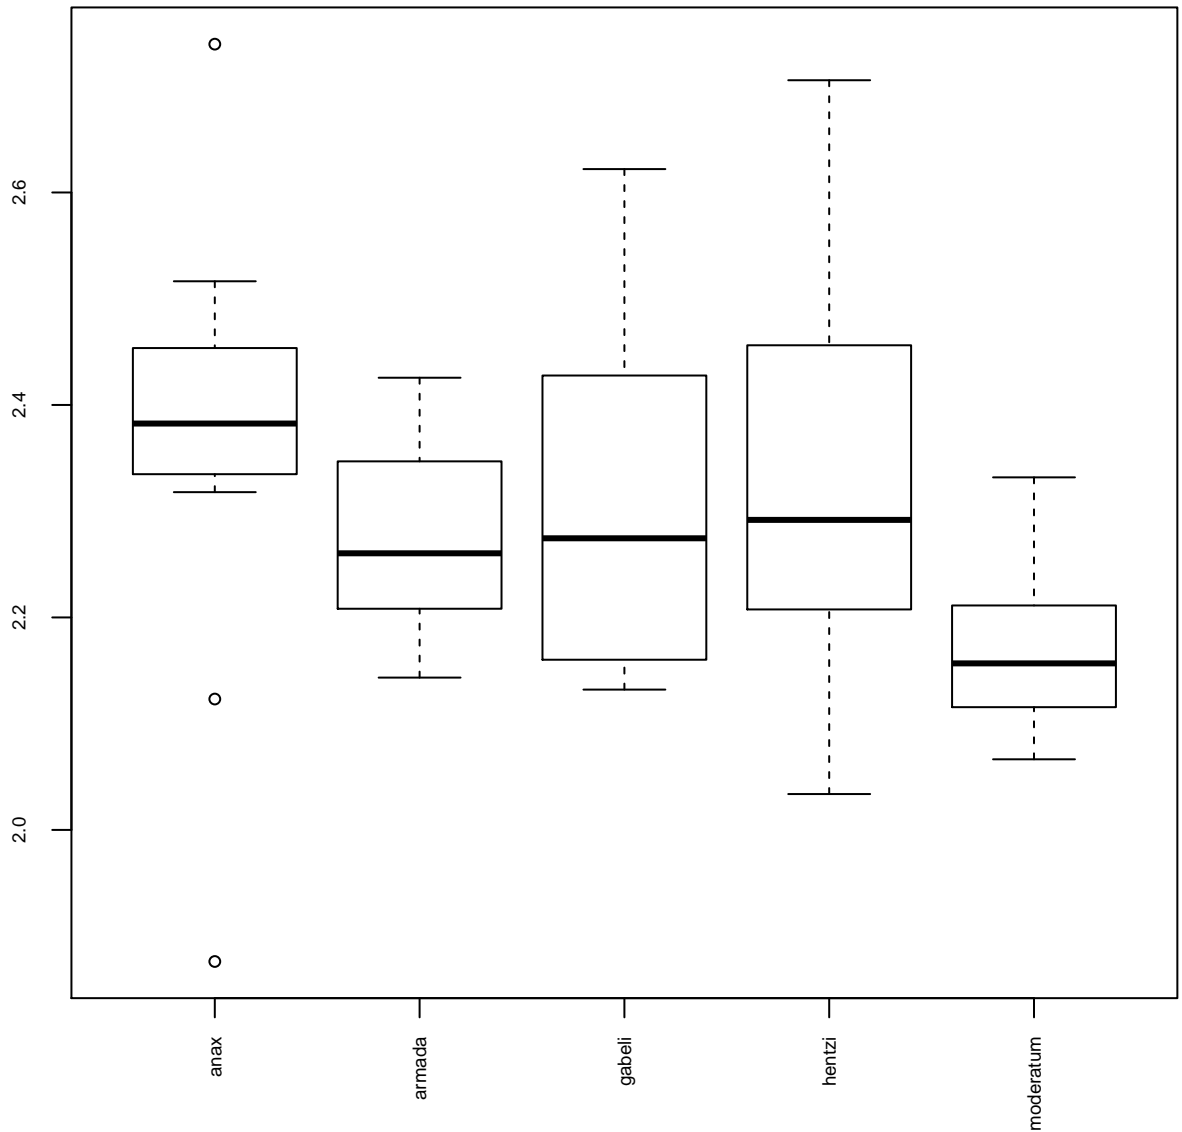

Supplement: Supplementary file 755

## Patella 3/Tibia 3 ratio – females

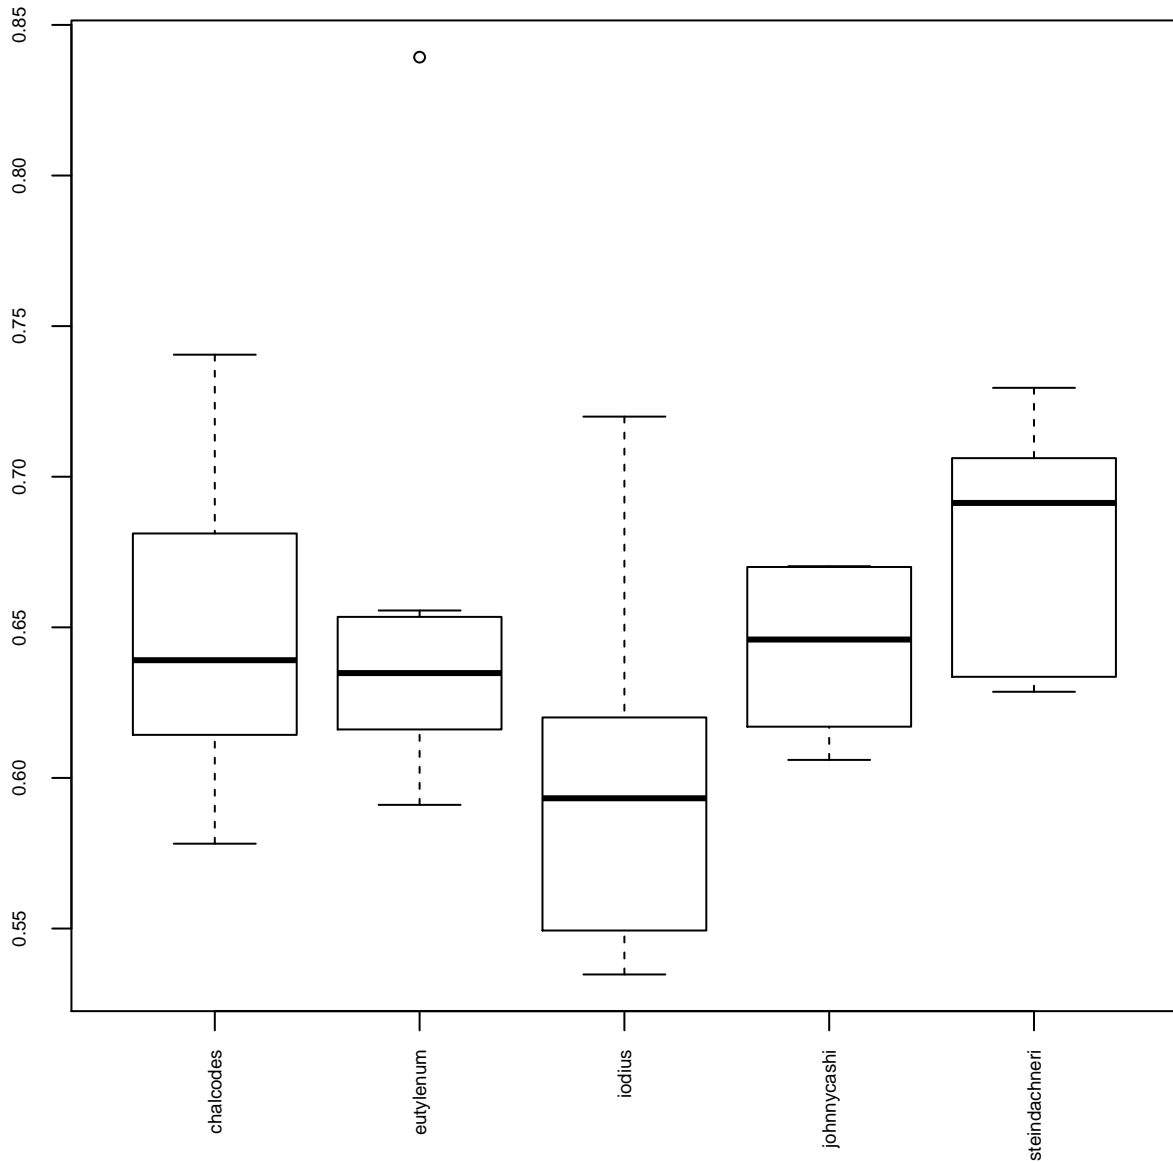

Supplement: Supplementary file 756

## Patella 3/Femur 4 Length ratio – females

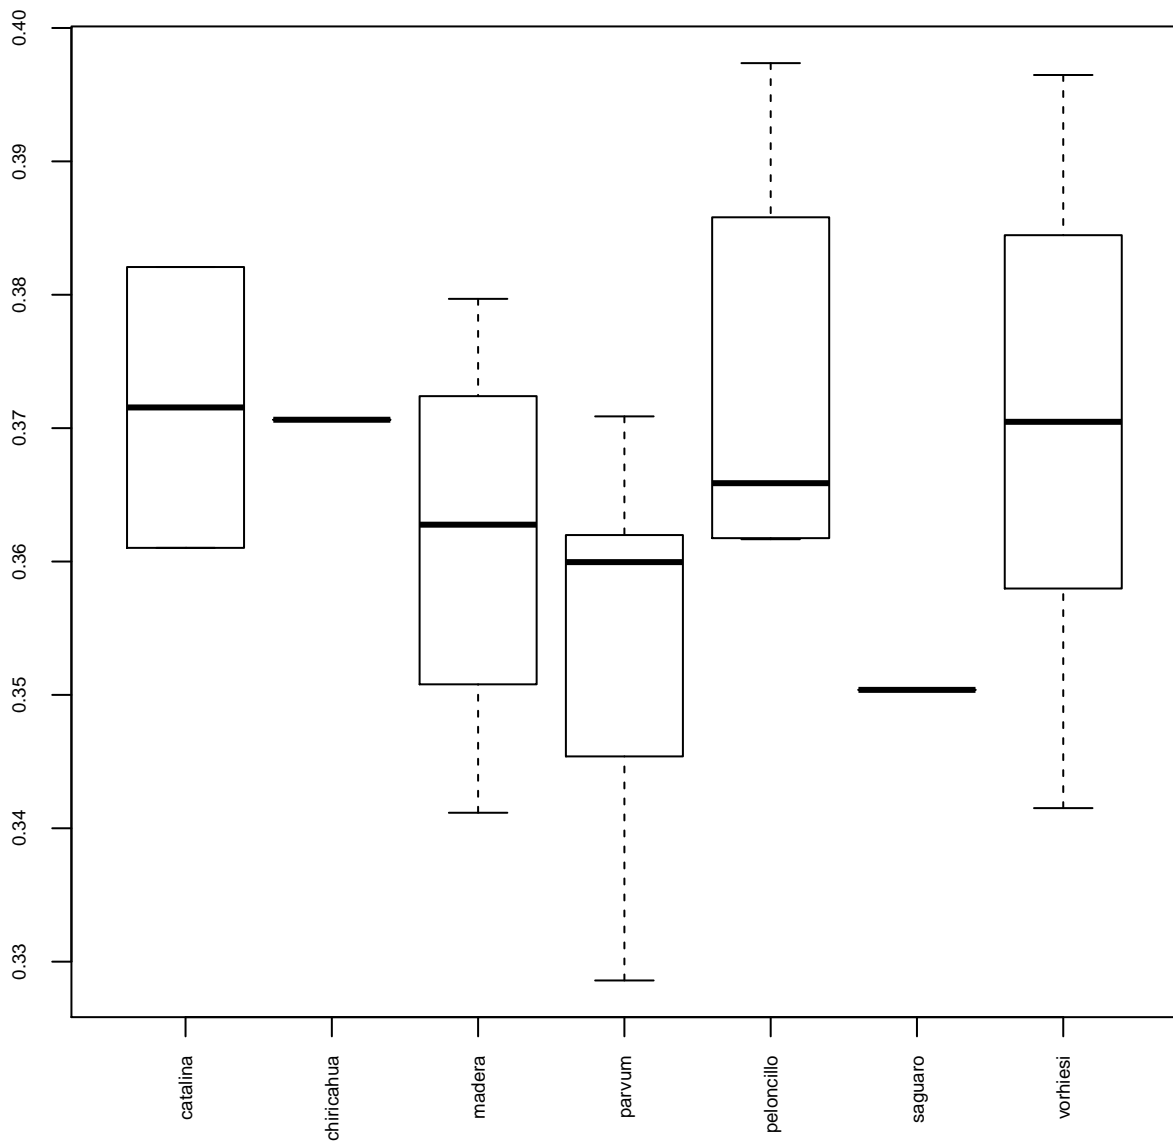

Supplement: Supplementary file 757

# Patella 1/Metatarsus 3 Length ratio – males

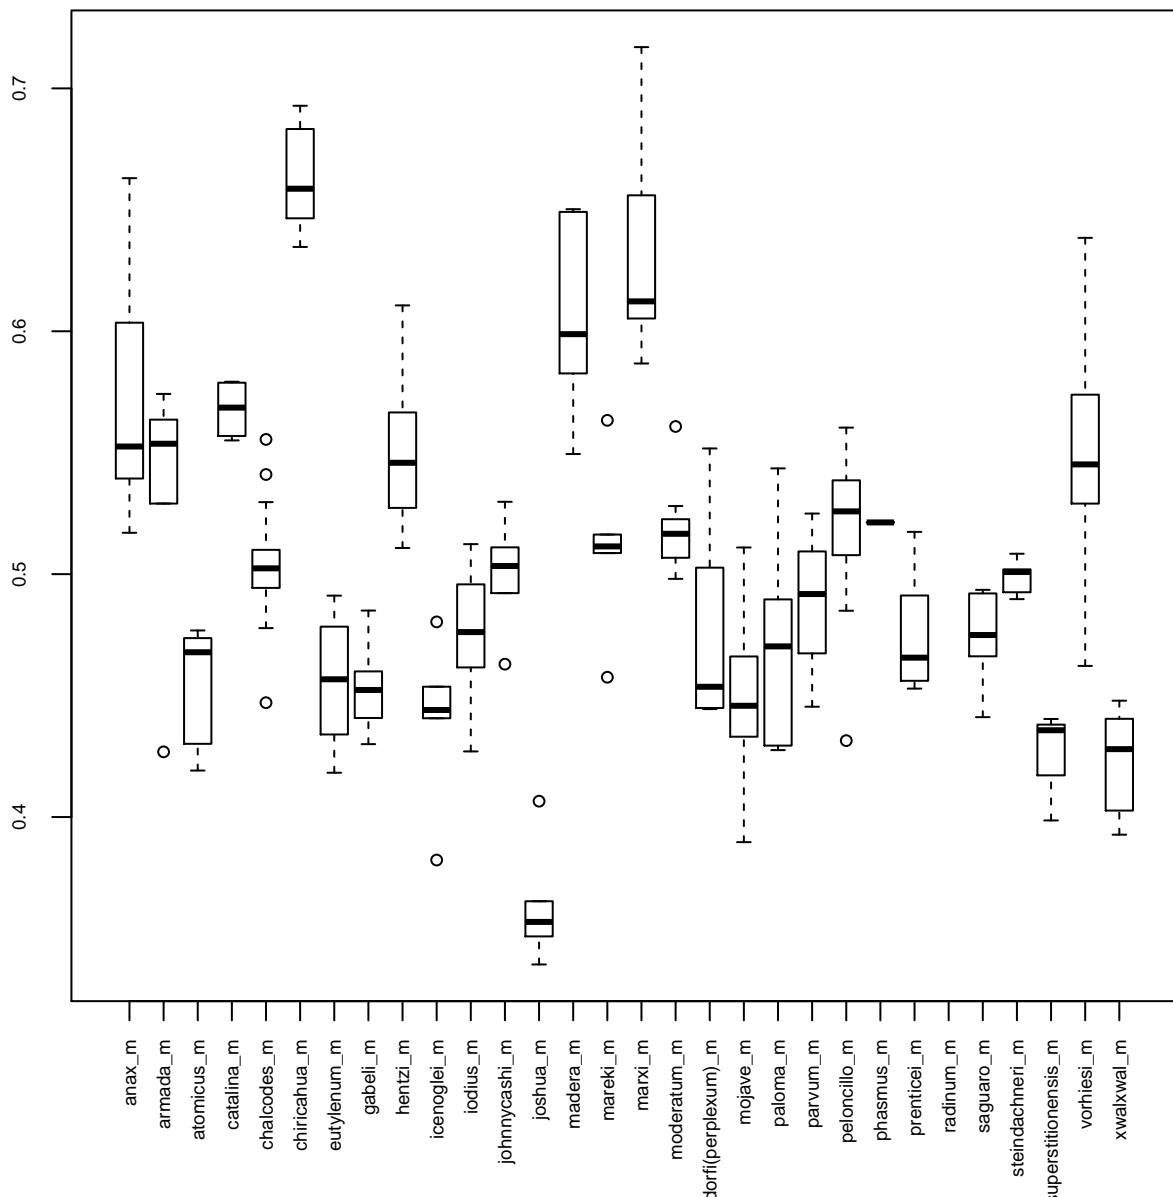

Supplement: Supplementary file 758

## Metatarsus 1/Patella 3 Length ratio – females

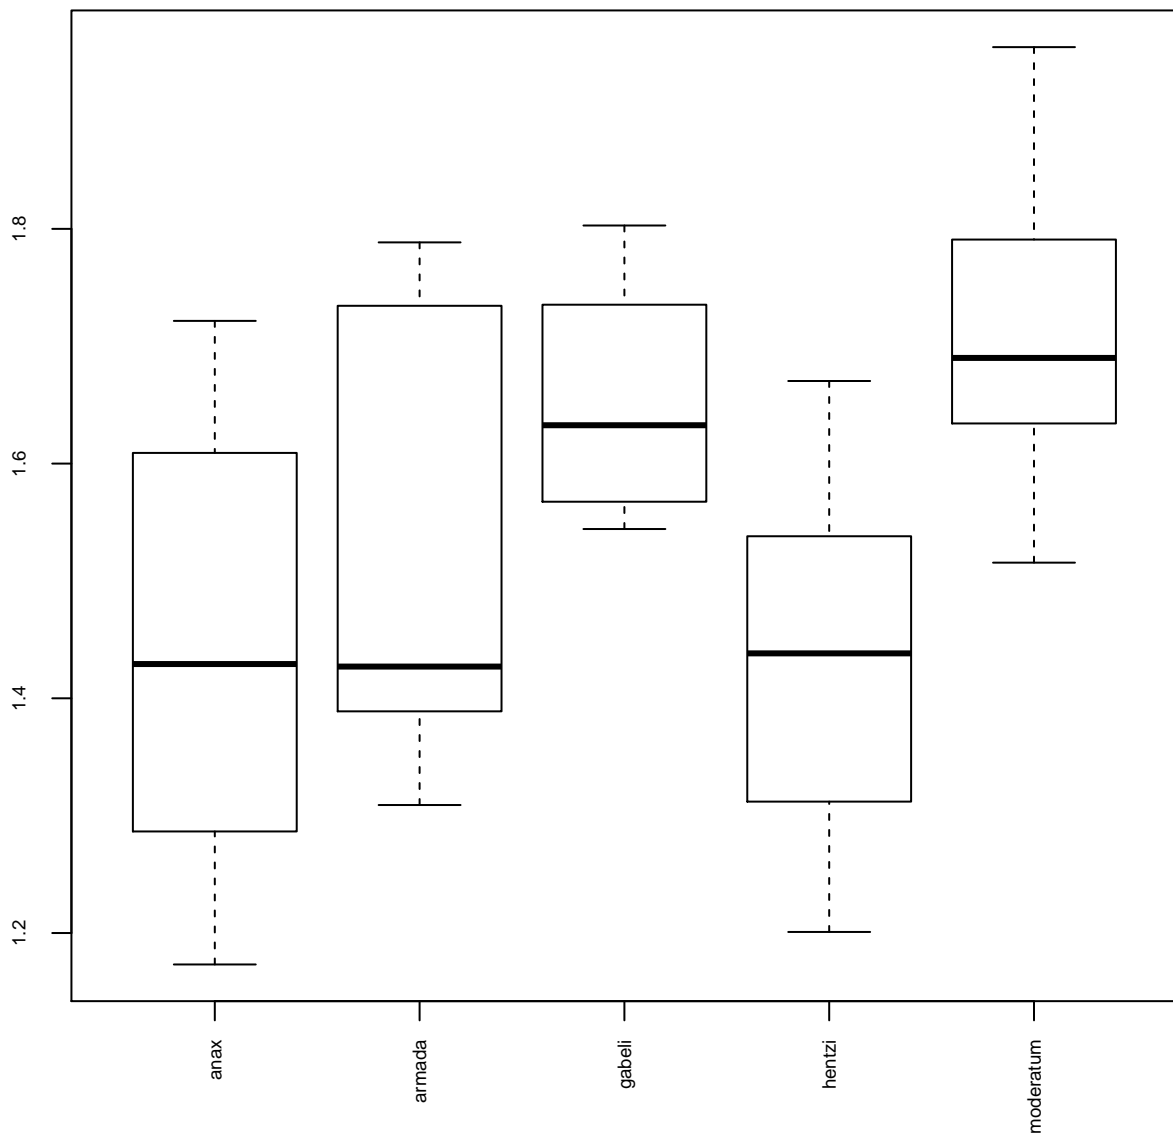

Supplement: Supplementary file 759

## Femur 3/Tibia 3 ratio – females

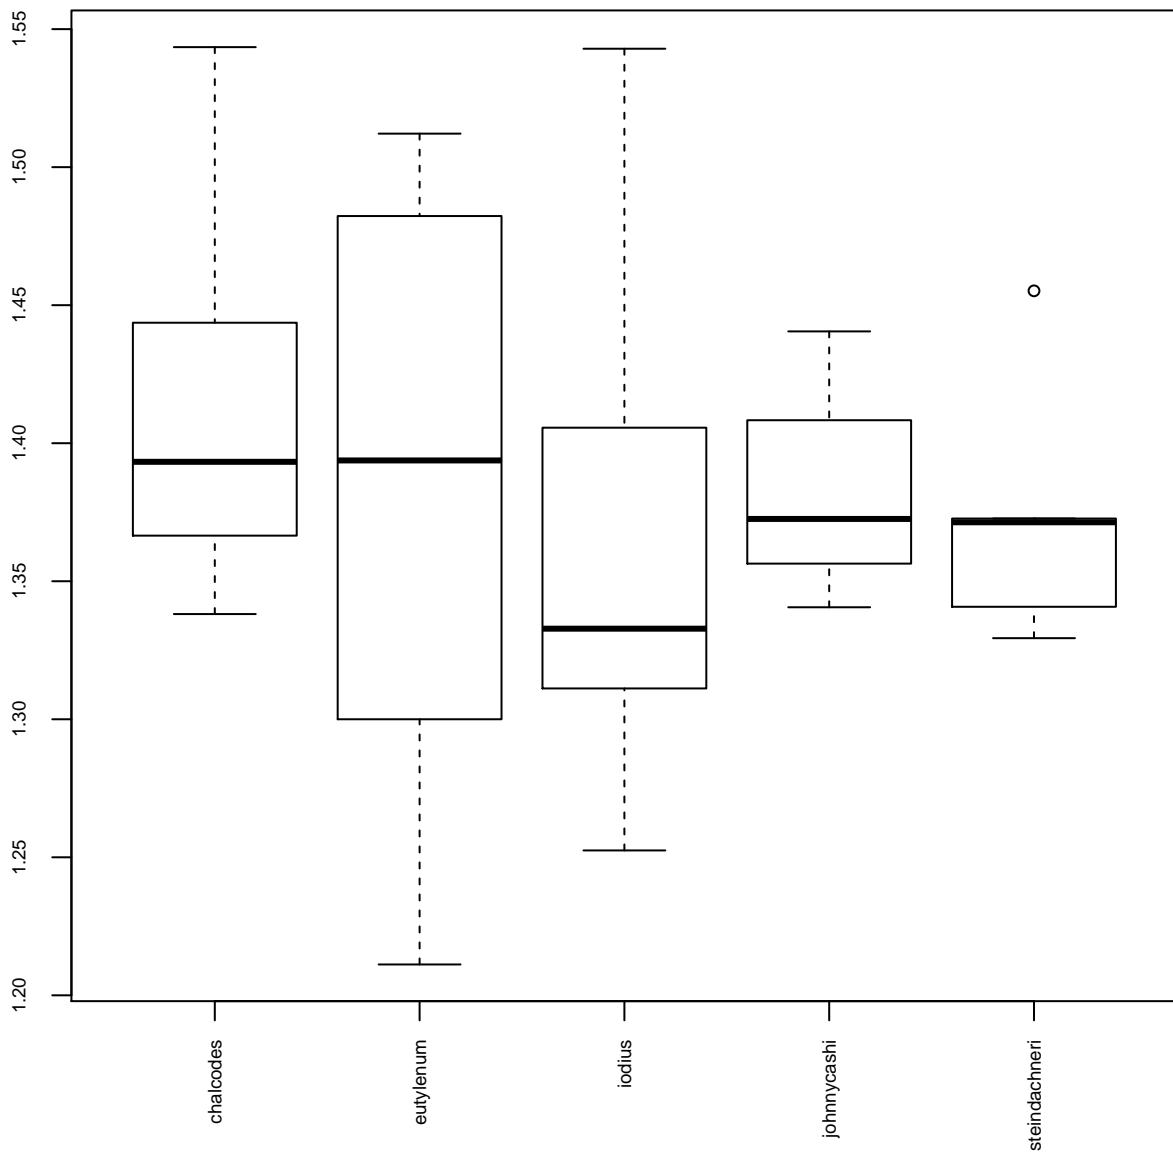

Supplement: Supplementary file 760

# Patella 4/Tibia 4 ratio – males

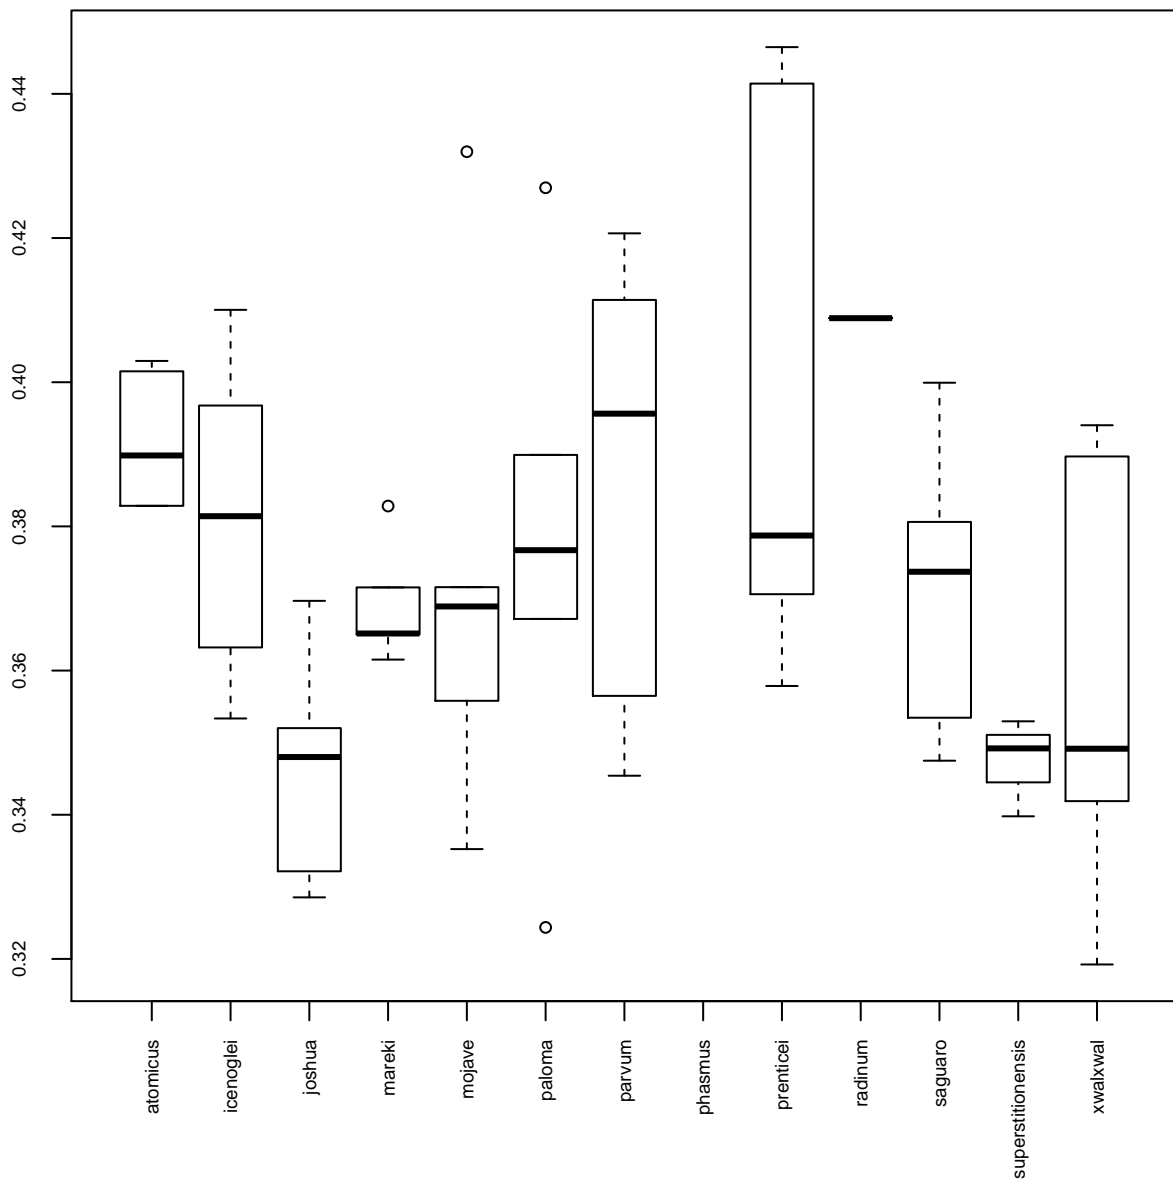

Supplement: Supplementary file 761

## Metatarsus 1/Metatarsus 4 ratio – males

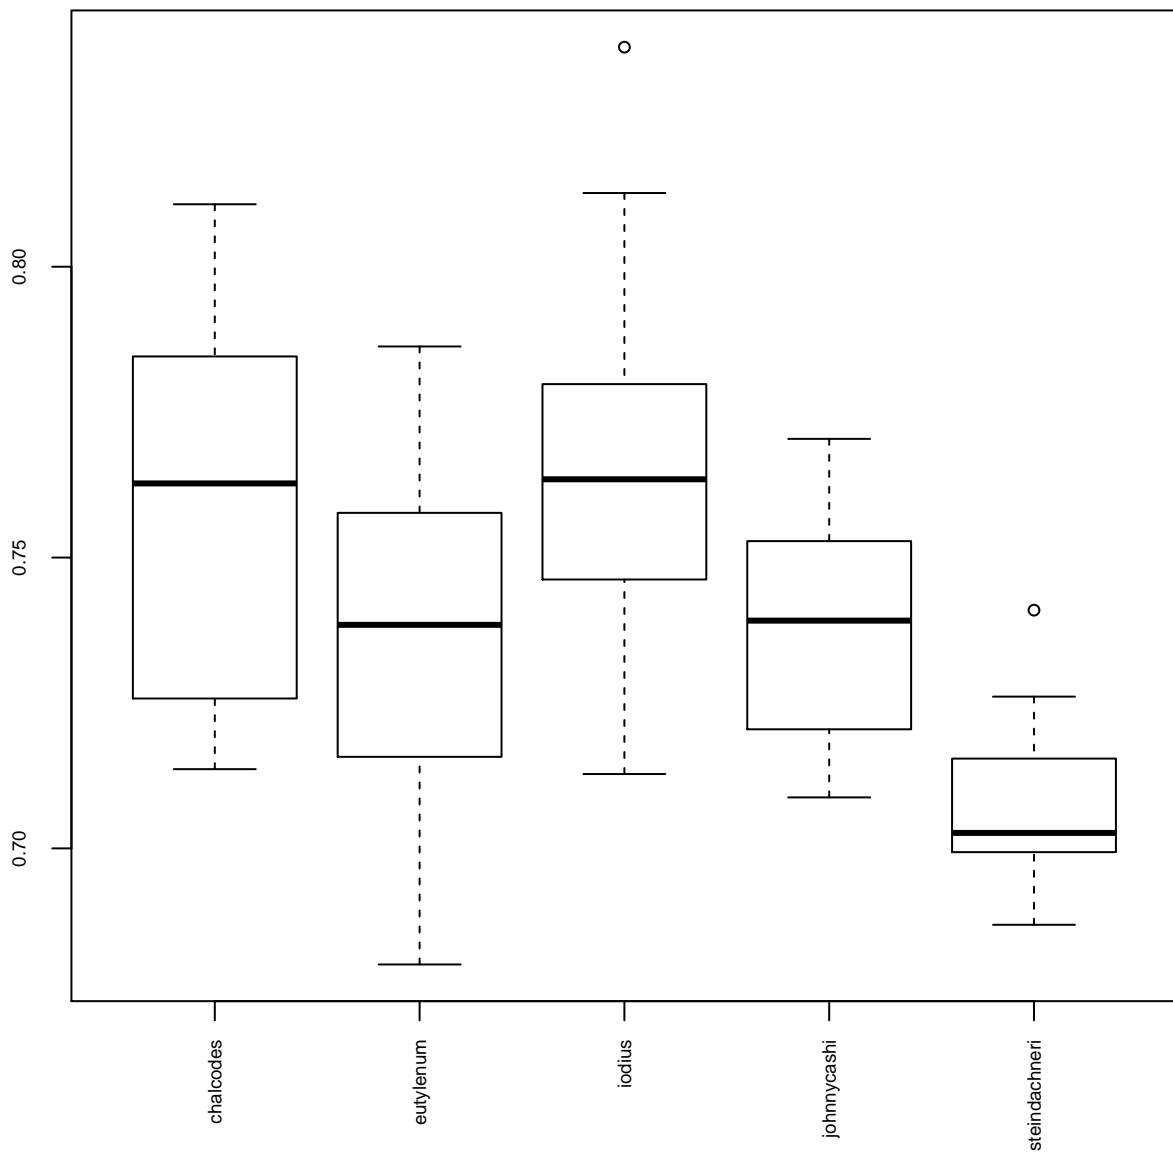

Supplement: Supplementary file 762

# Patella 3/Patella 4 ratio – males

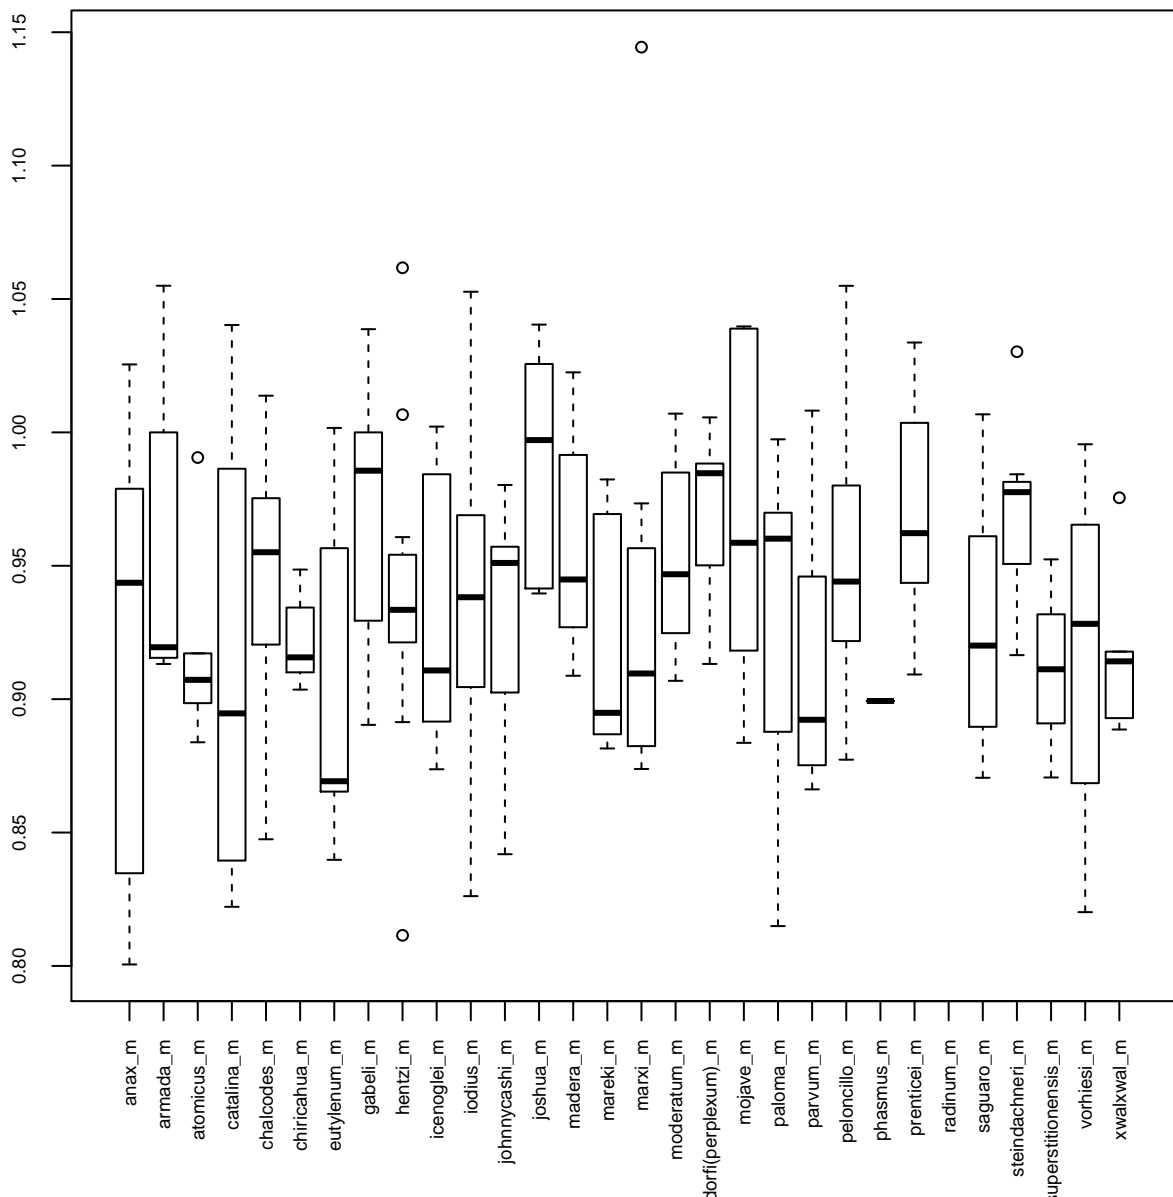

Supplement: Supplementary file 763

## Metatarsus 1/Patella 4 Length ratio – males

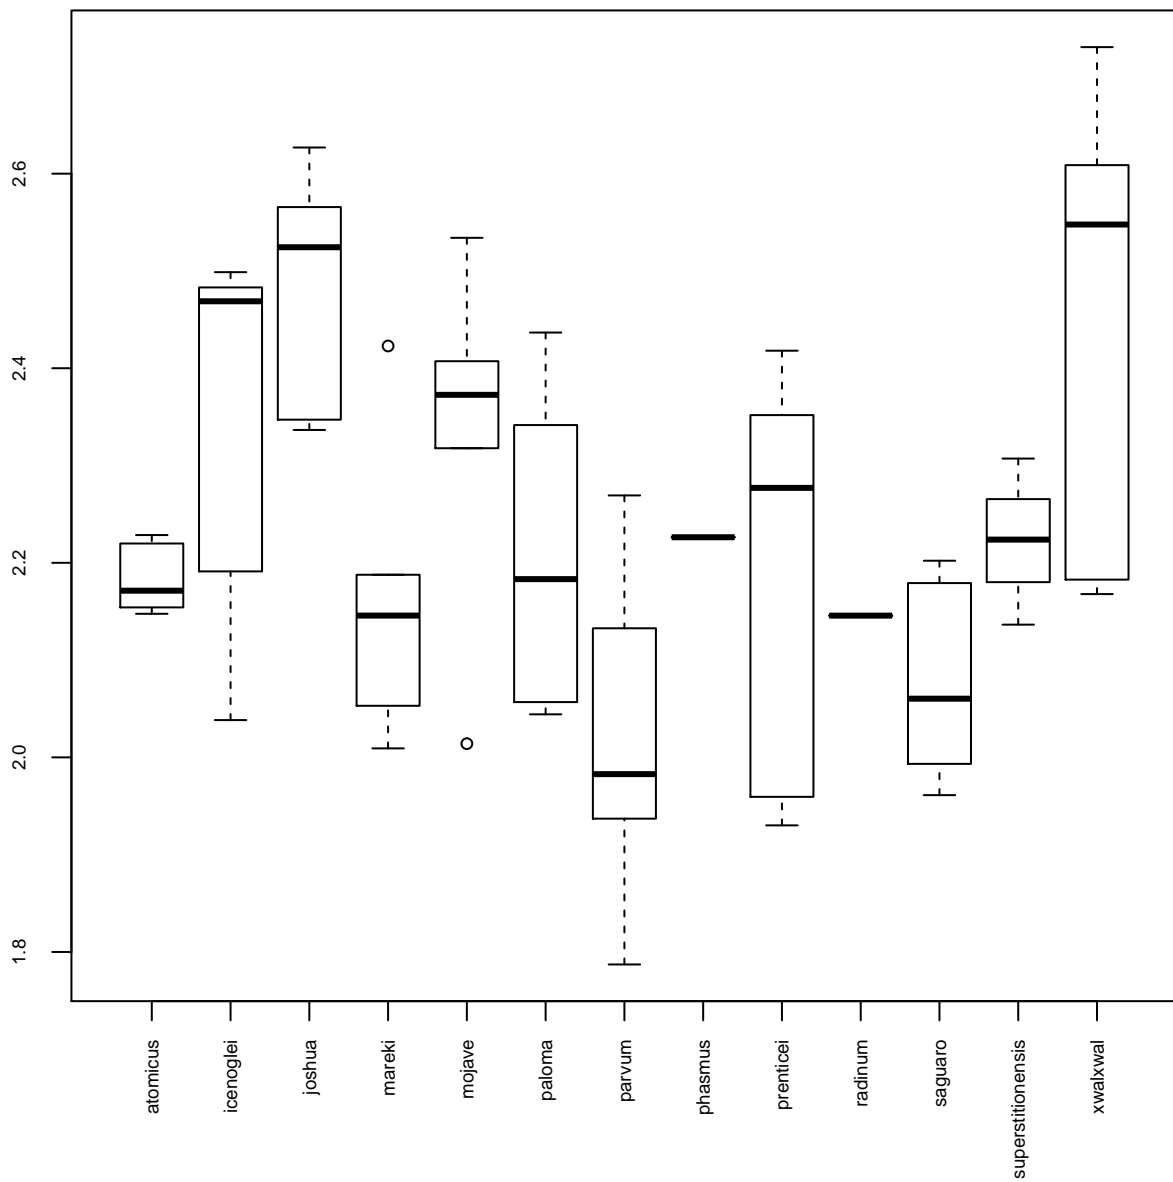

Supplement: Supplementary file 764

## Tarsus 1/Femur 4 Length ratio – males

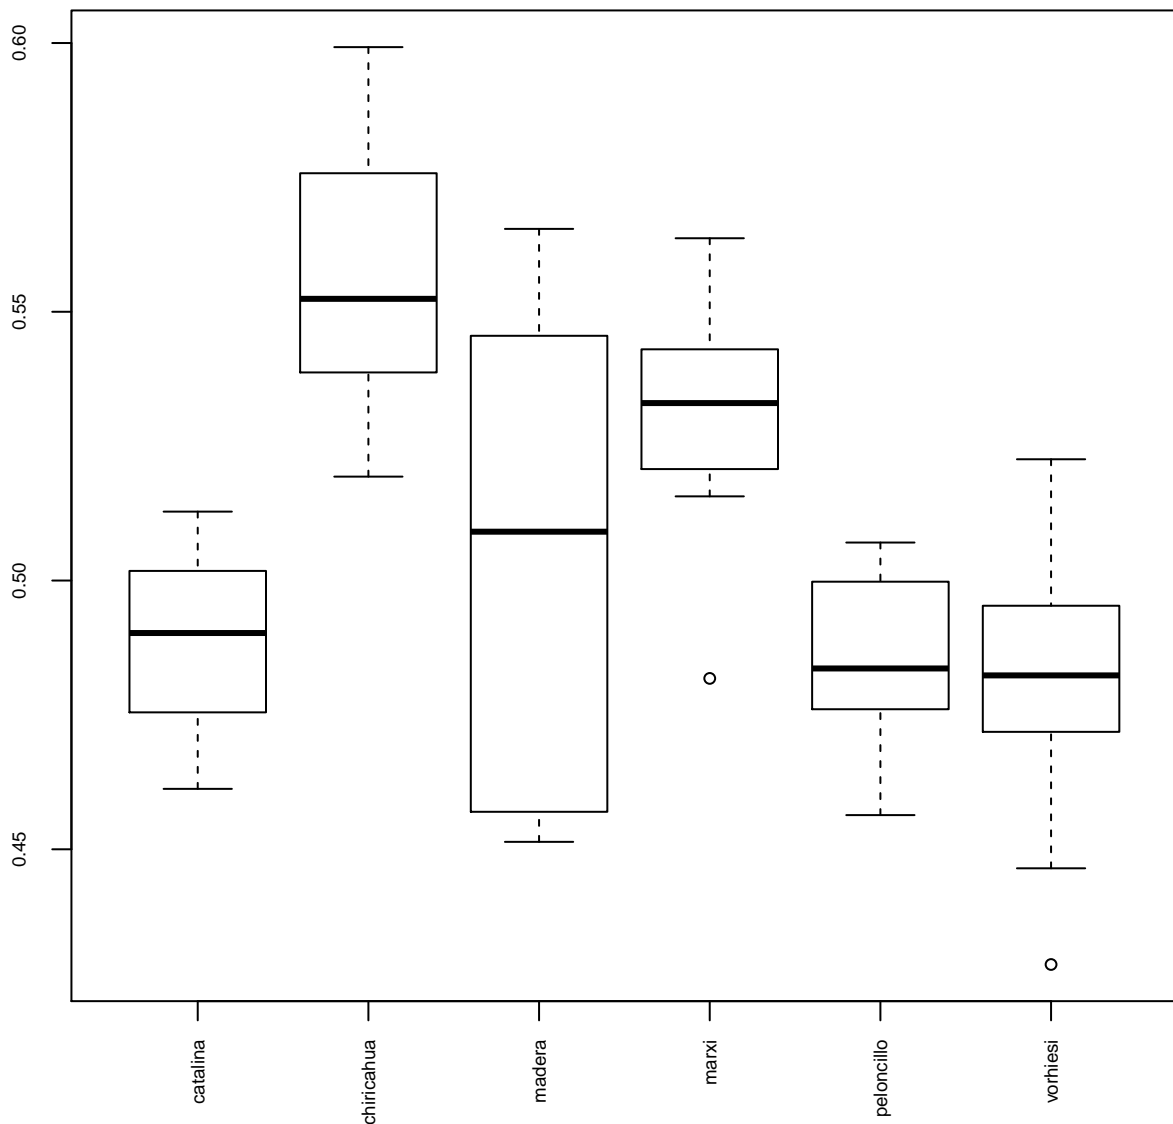

Supplement: Supplementary file 765

# Tarsus 3/Metatarsus 4 Length ratio – males

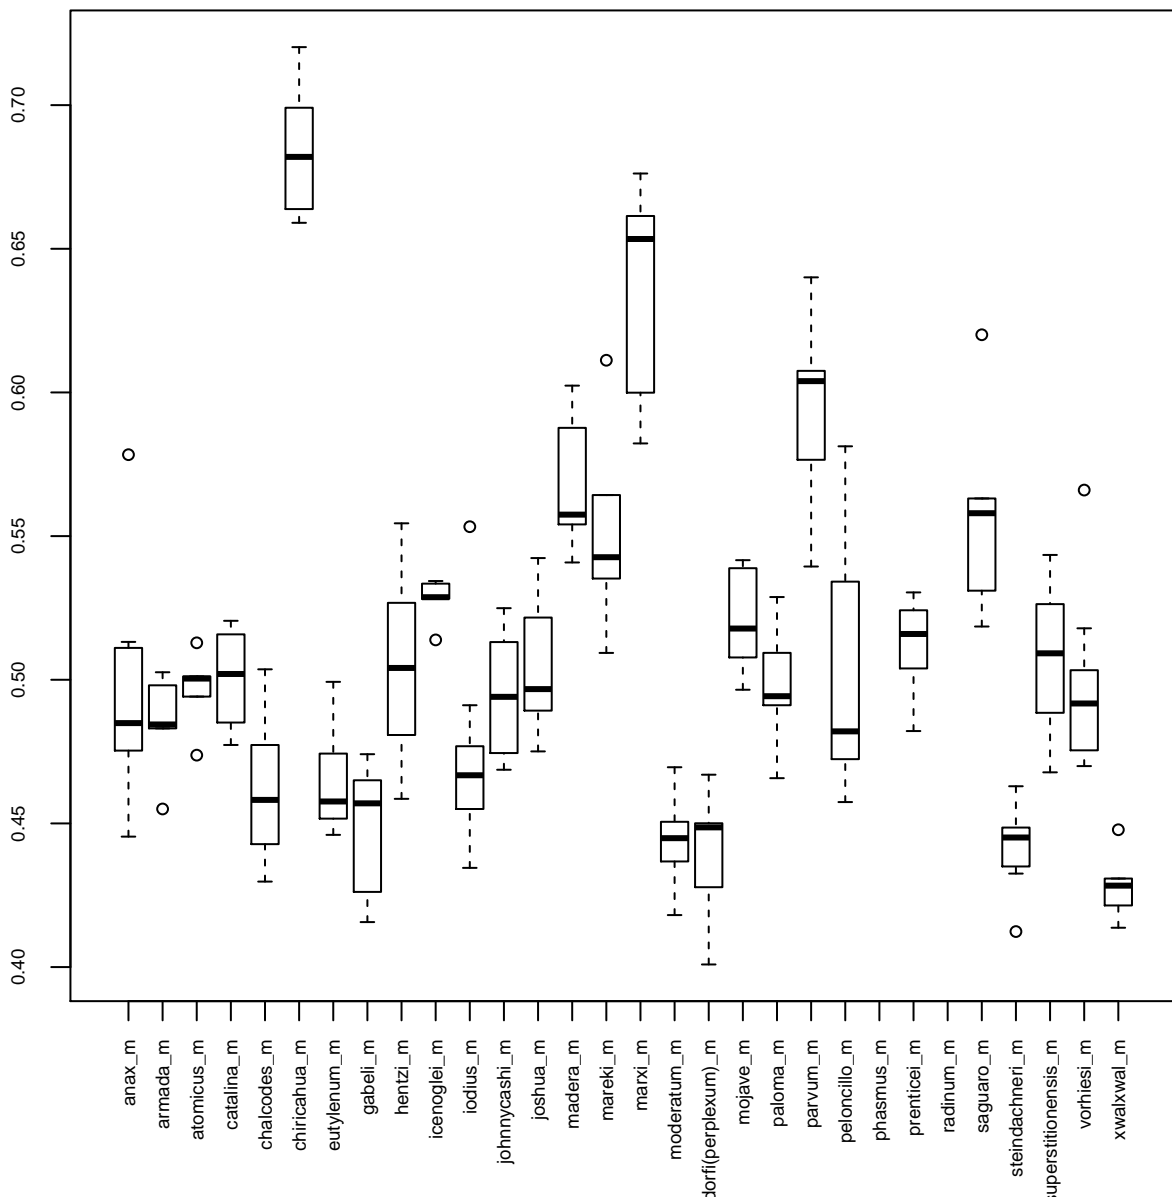

Supplement: Supplementary file 766

## Tibia 1/Metatarsus 4 Length ratio – males

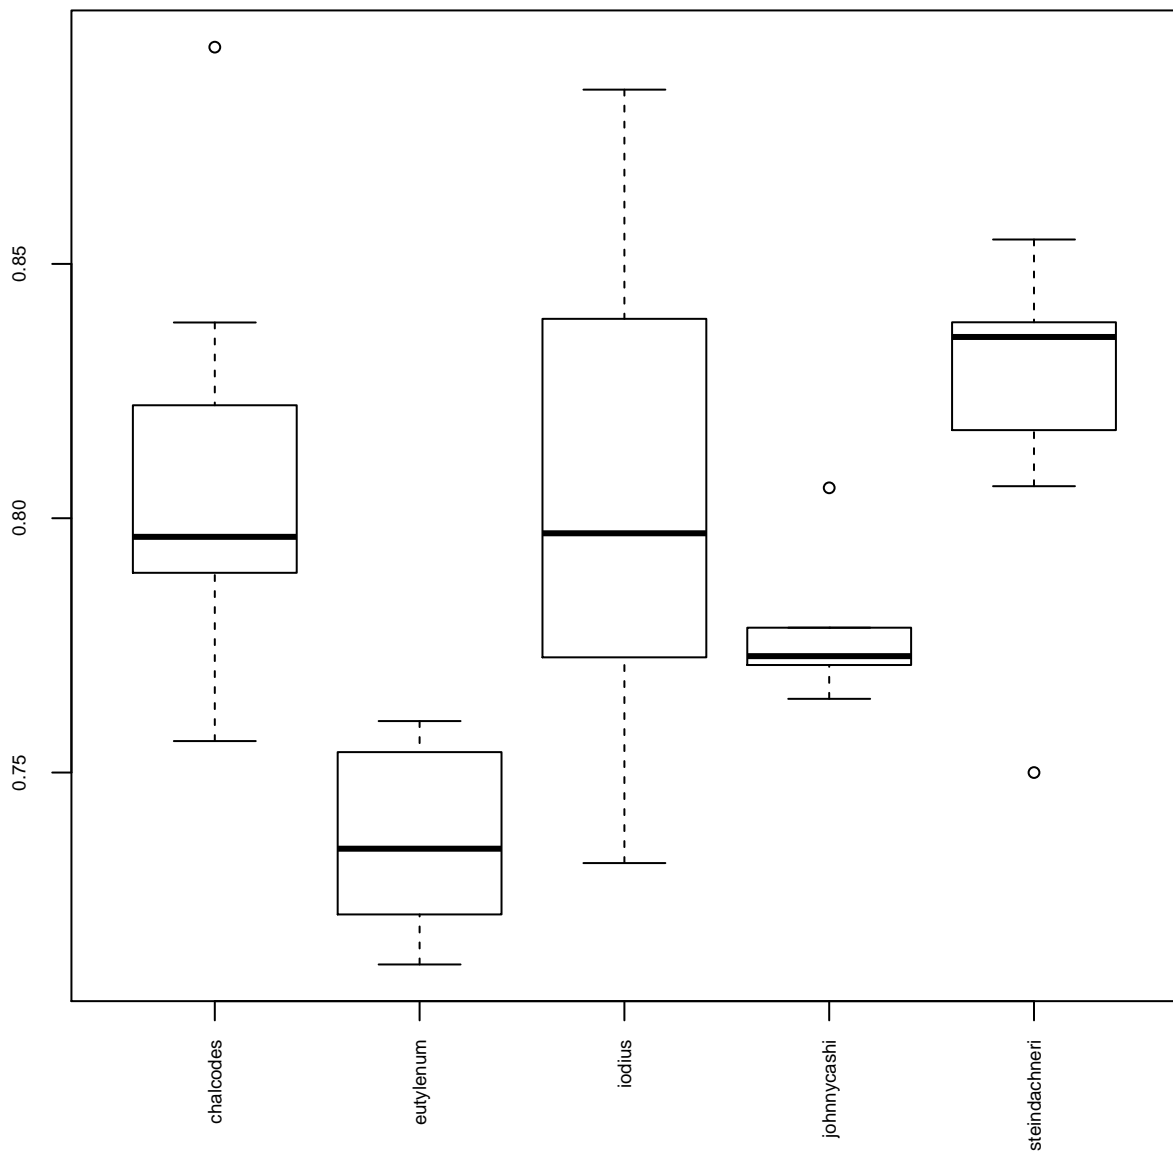

Supplement: Supplementary file 767

## Femur 1/Tarsus 3 ratio – females

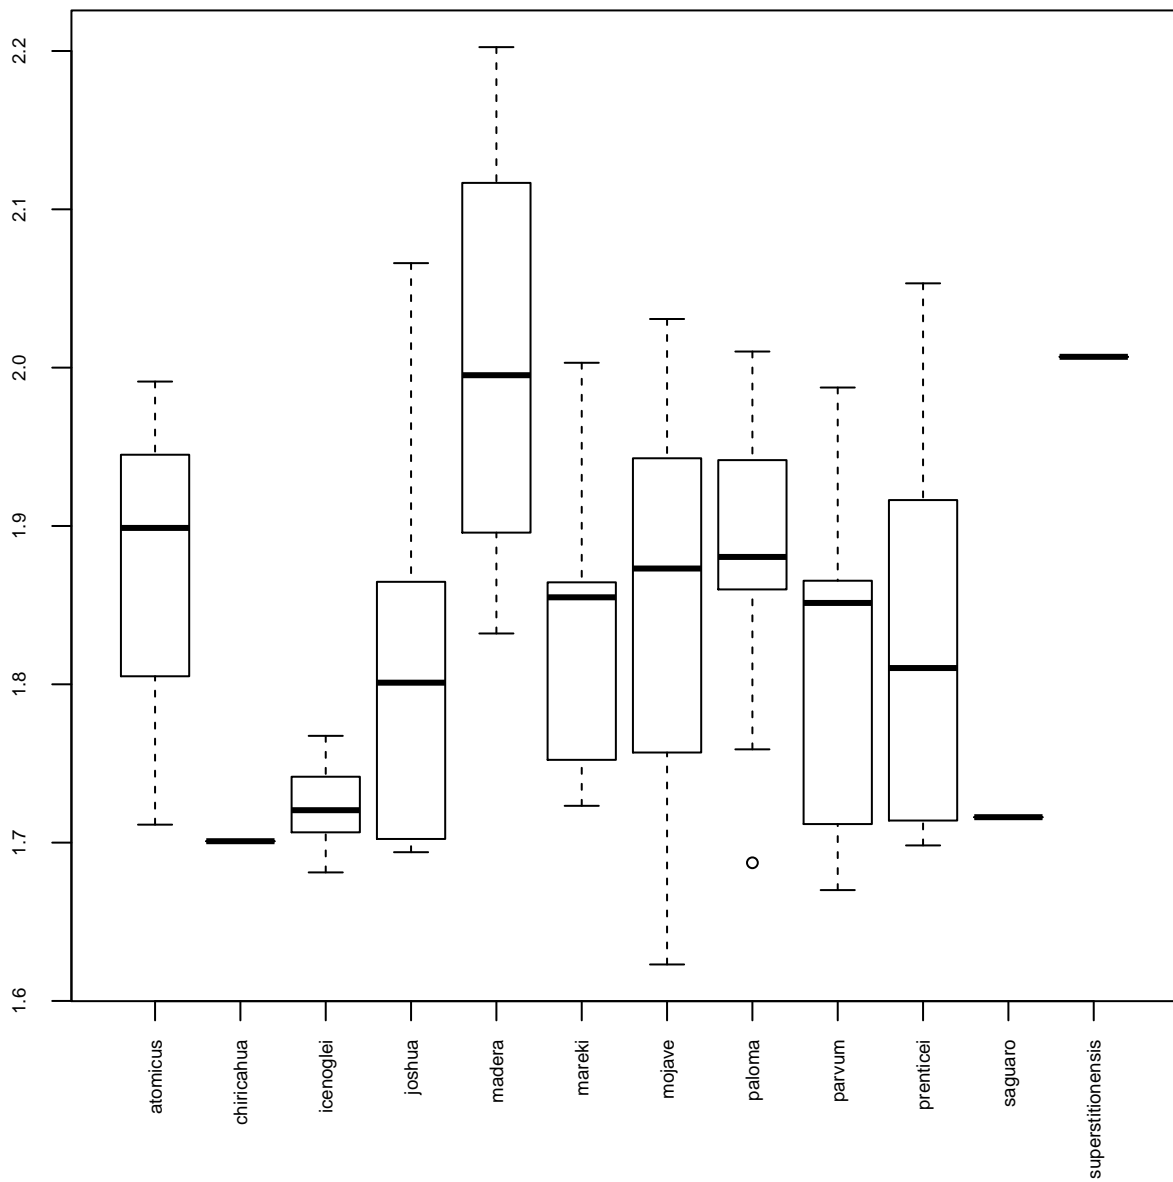

Supplement: Supplementary file 768

## Carapace Length/Patella 4 ratio – males

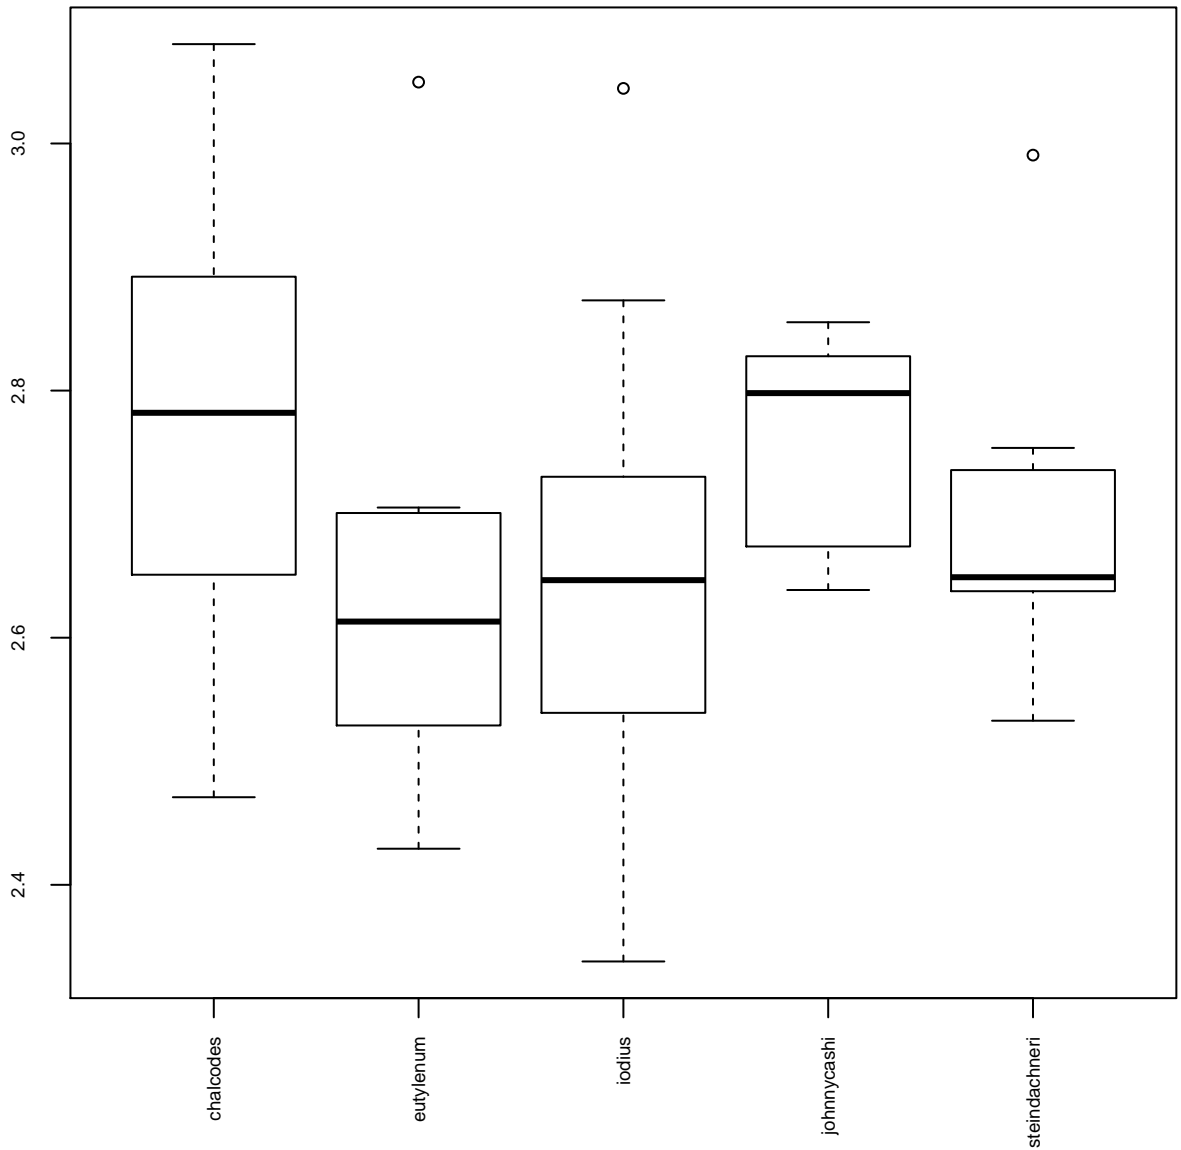

Supplement: Supplementary file 769

# Tarsus 1/Metatarsus 3 Length ratio – females

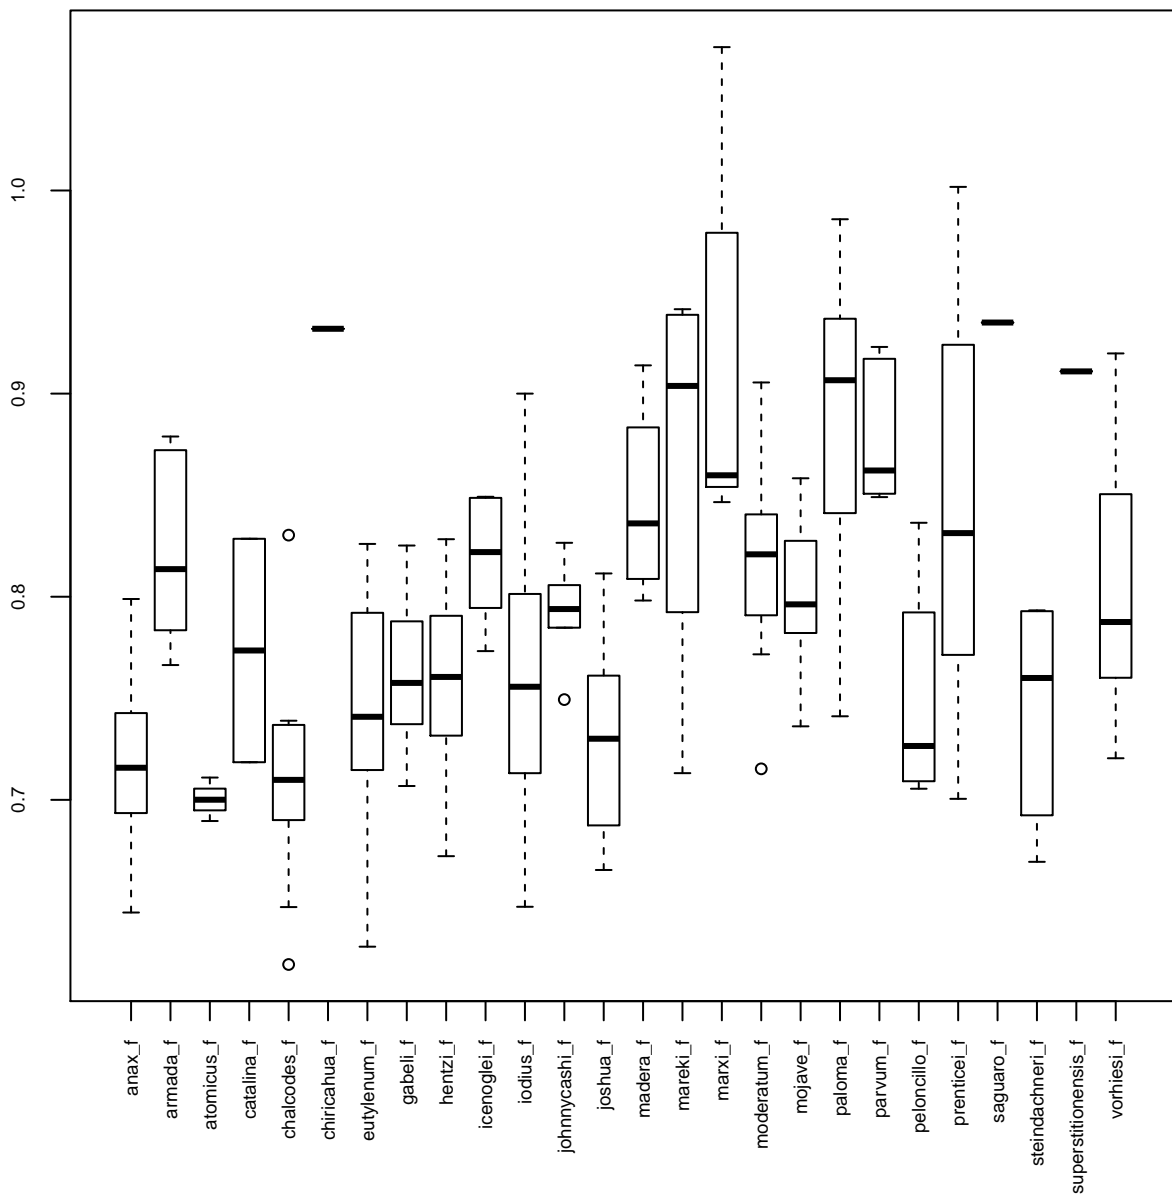

Supplement: Supplementary file 770

# Leg 3 Length – females

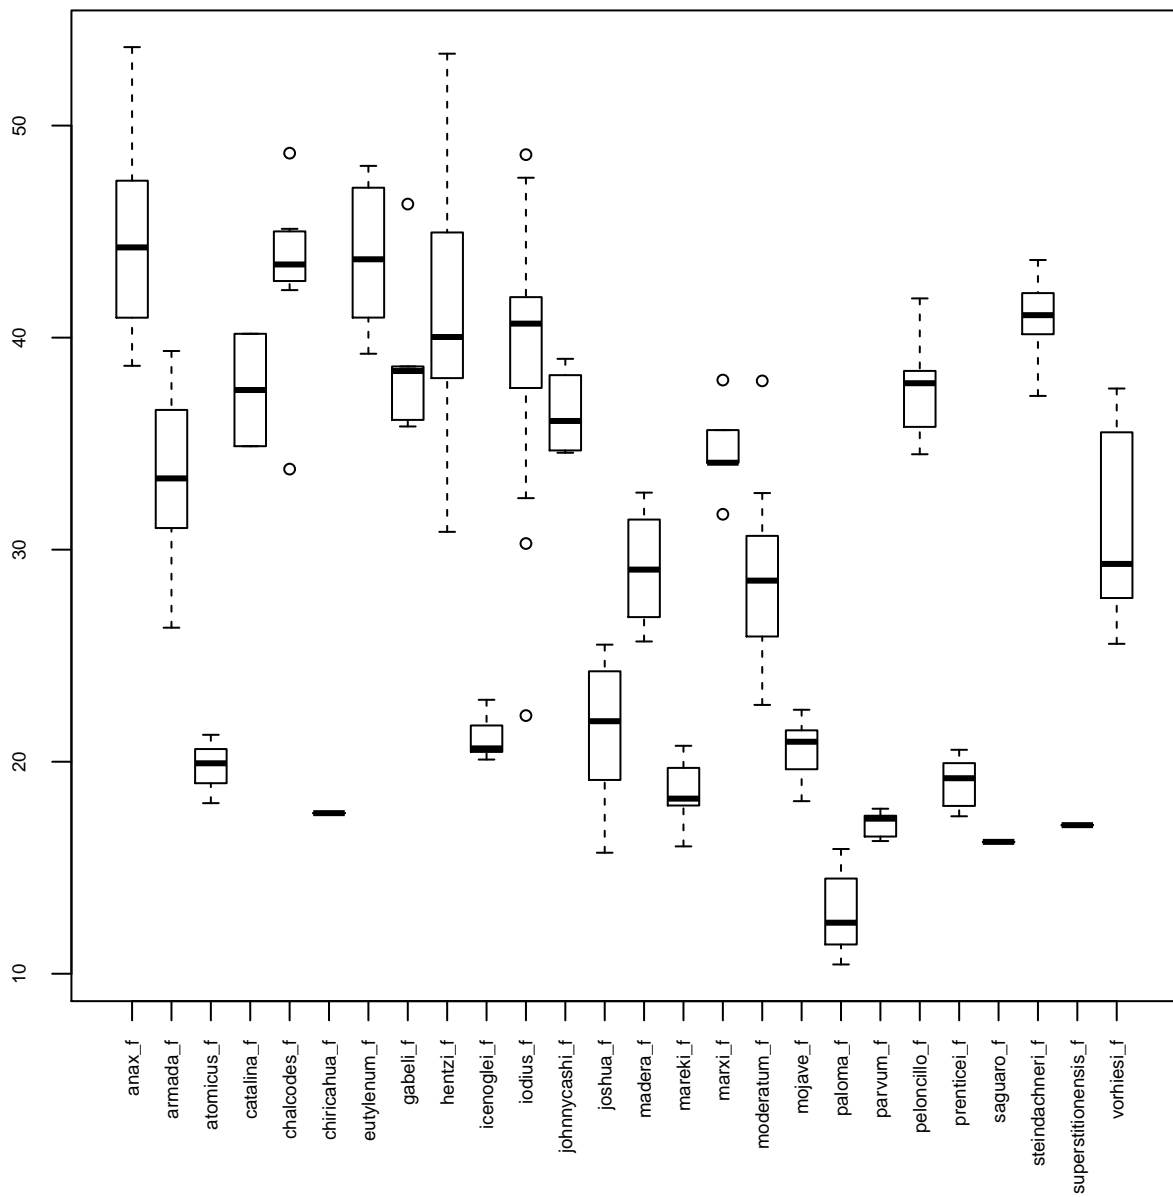

Supplement: Supplementary file 771

## Patella 3/Tibia 4 Length ratio – males

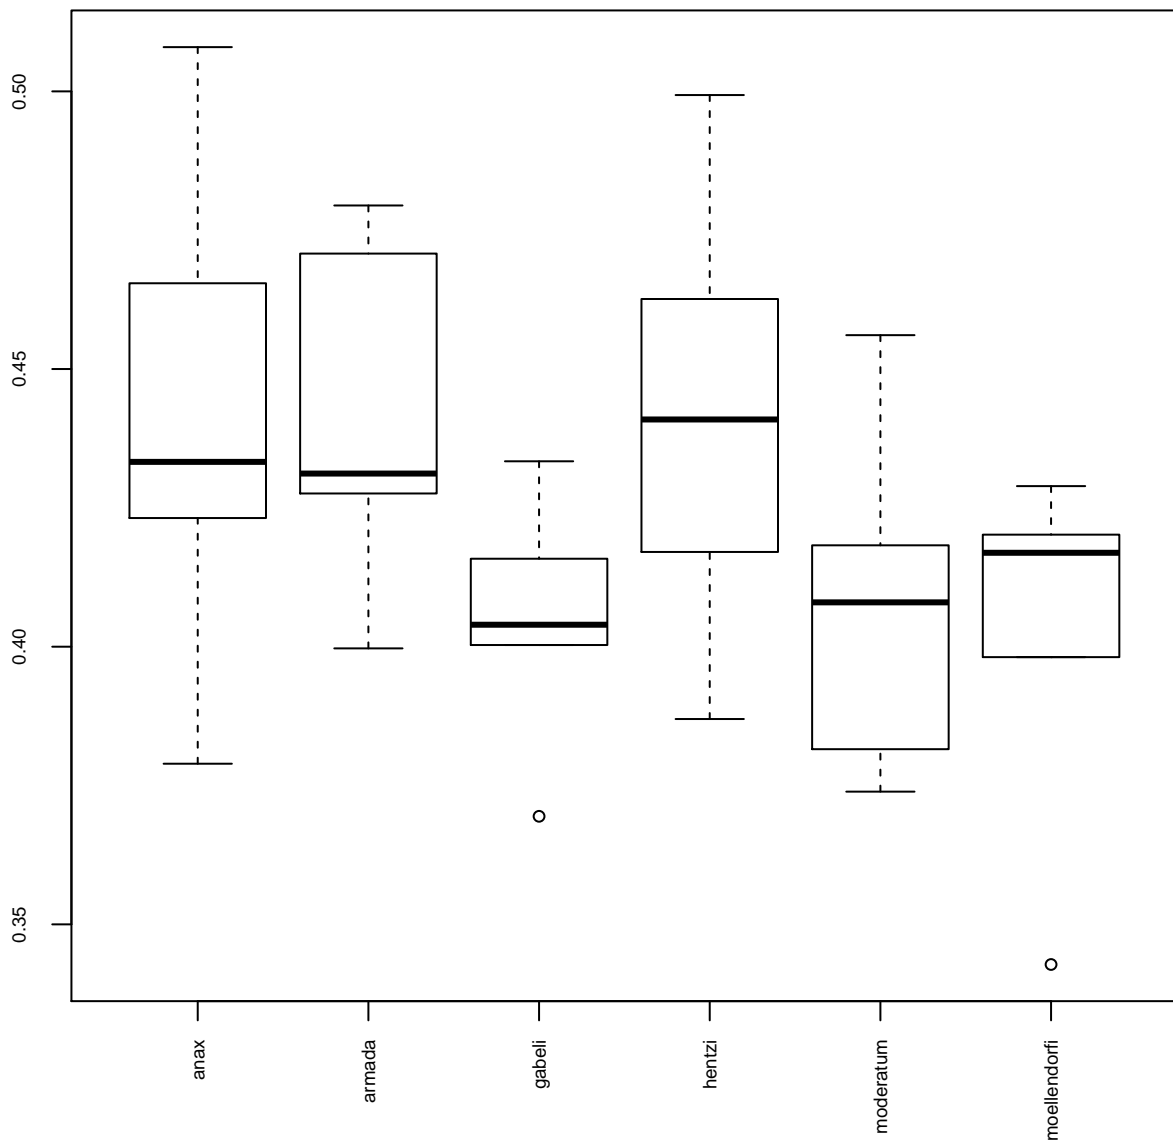

Supplement: Supplementary file 772

## Patella 3/Metatarsus 3 ratio – males

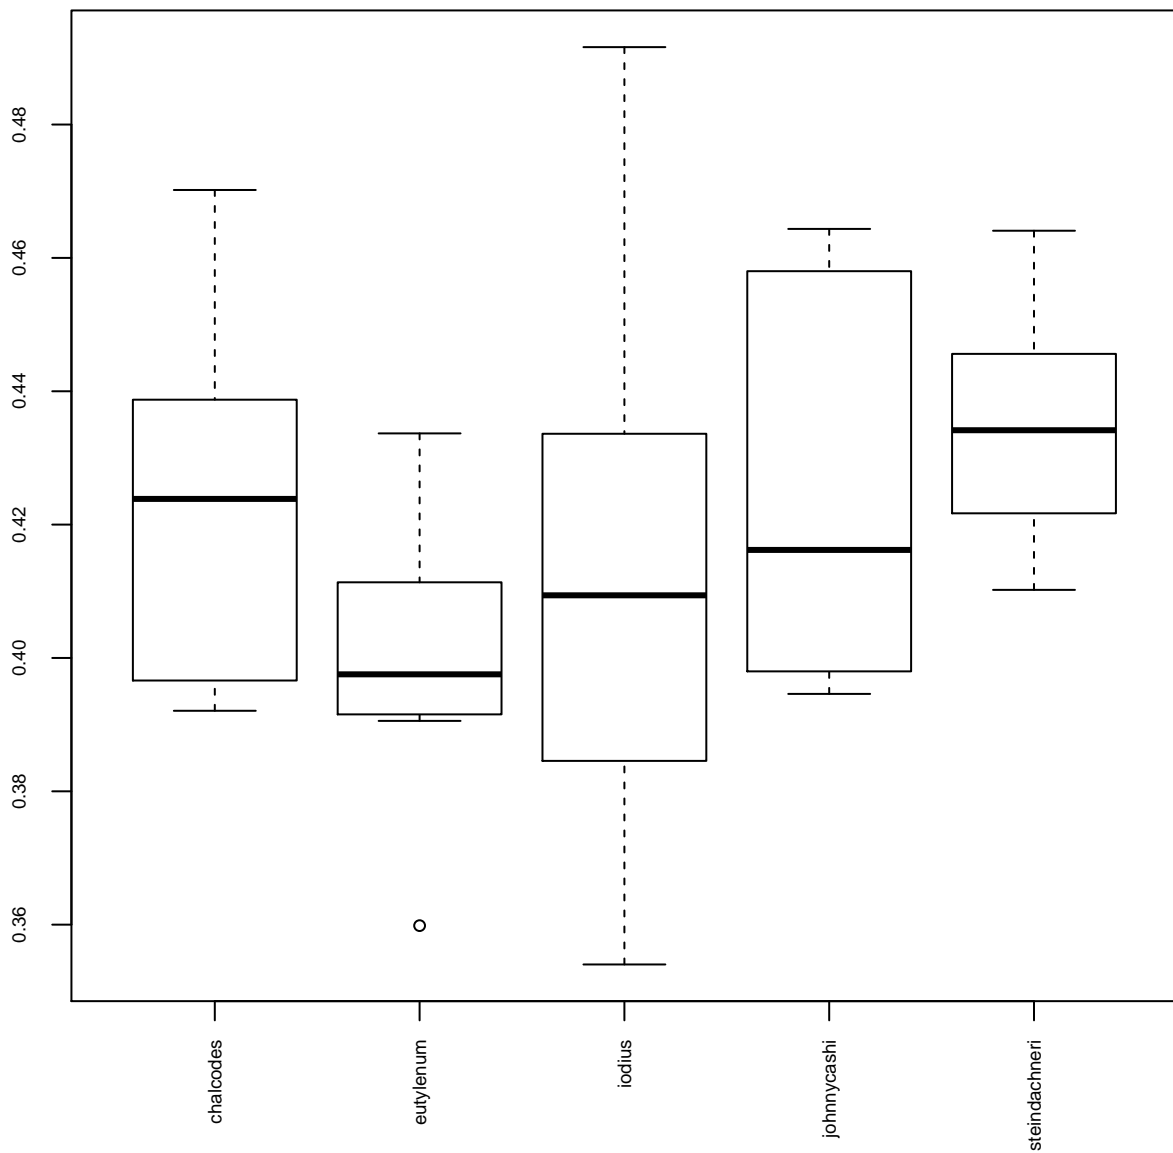

Supplement: Supplementary file 773

## Tibia 1/Tibia 4 ratio – females

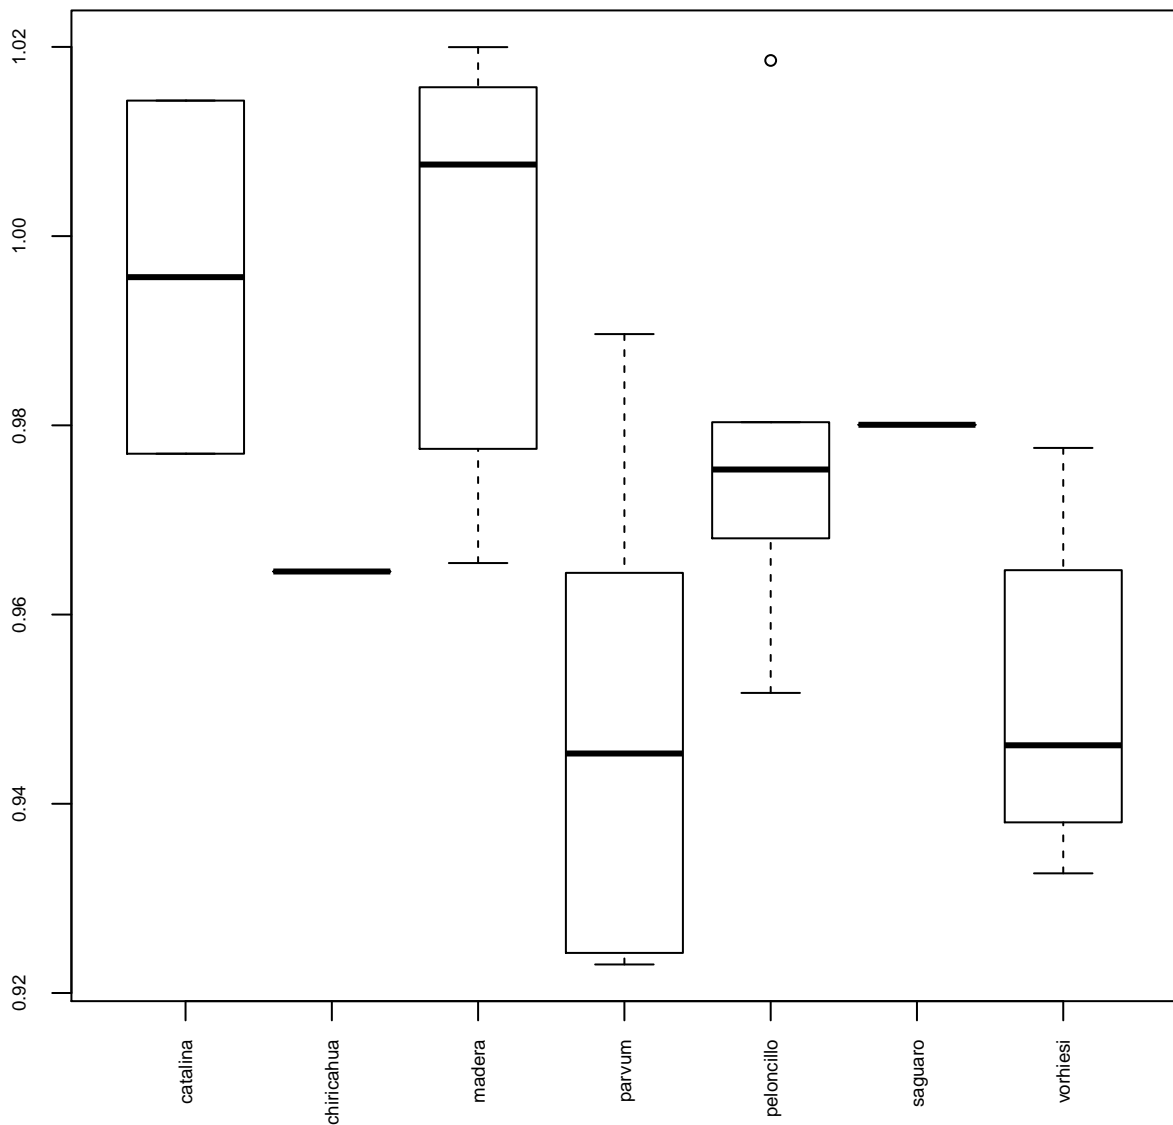

Supplement: Supplementary file 774

## Femur 1/Metatarsus 3 ratio – males

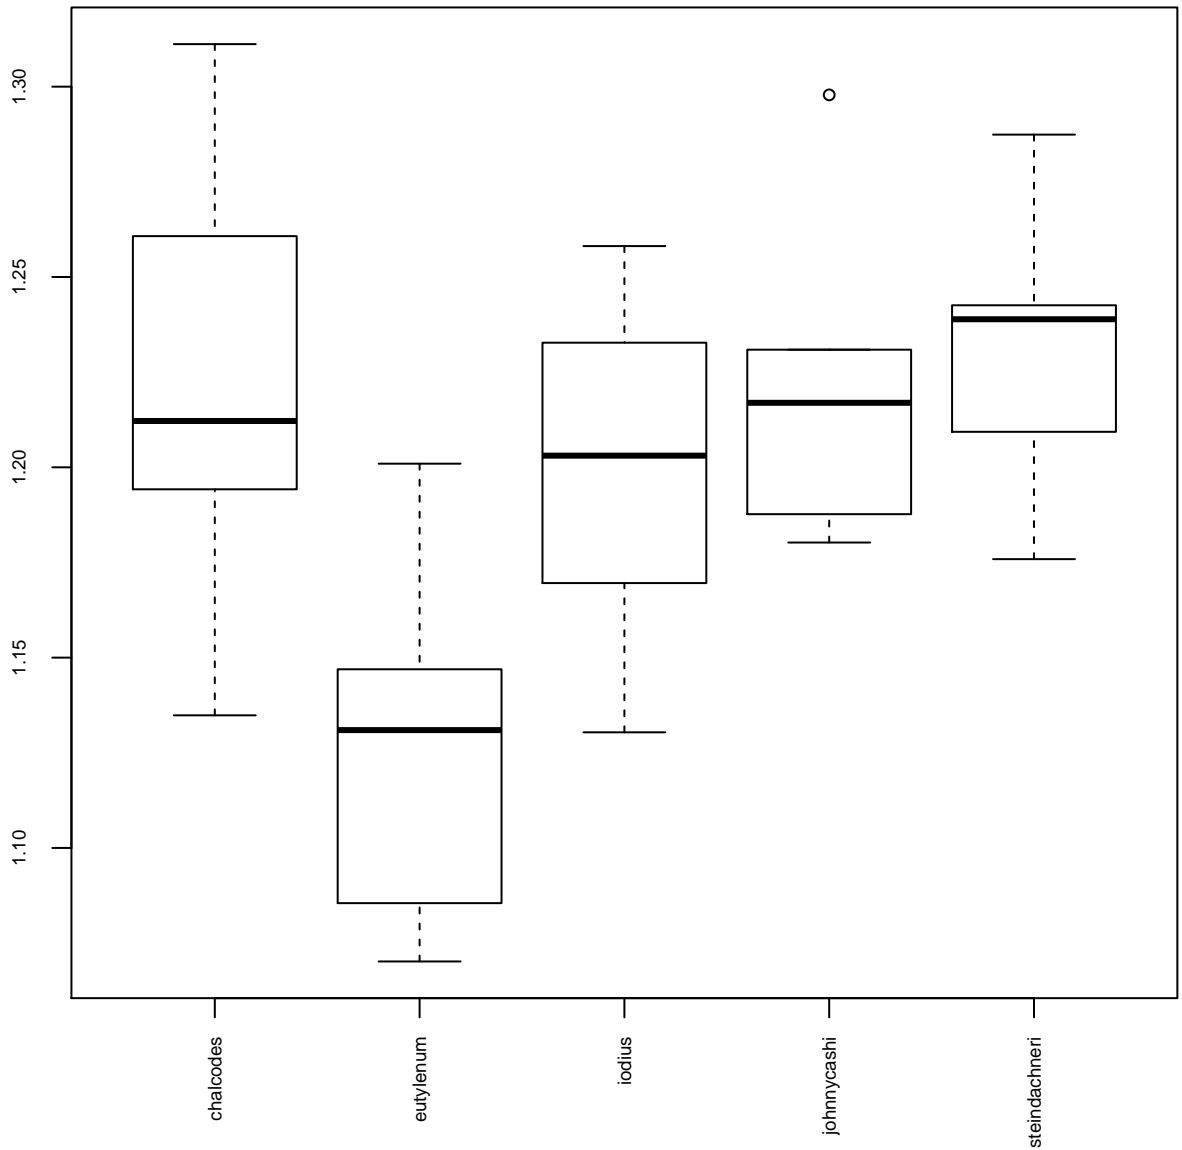

Supplement: Supplementary file 775

## Tarsus 1/Patella 3 Length ratio – males

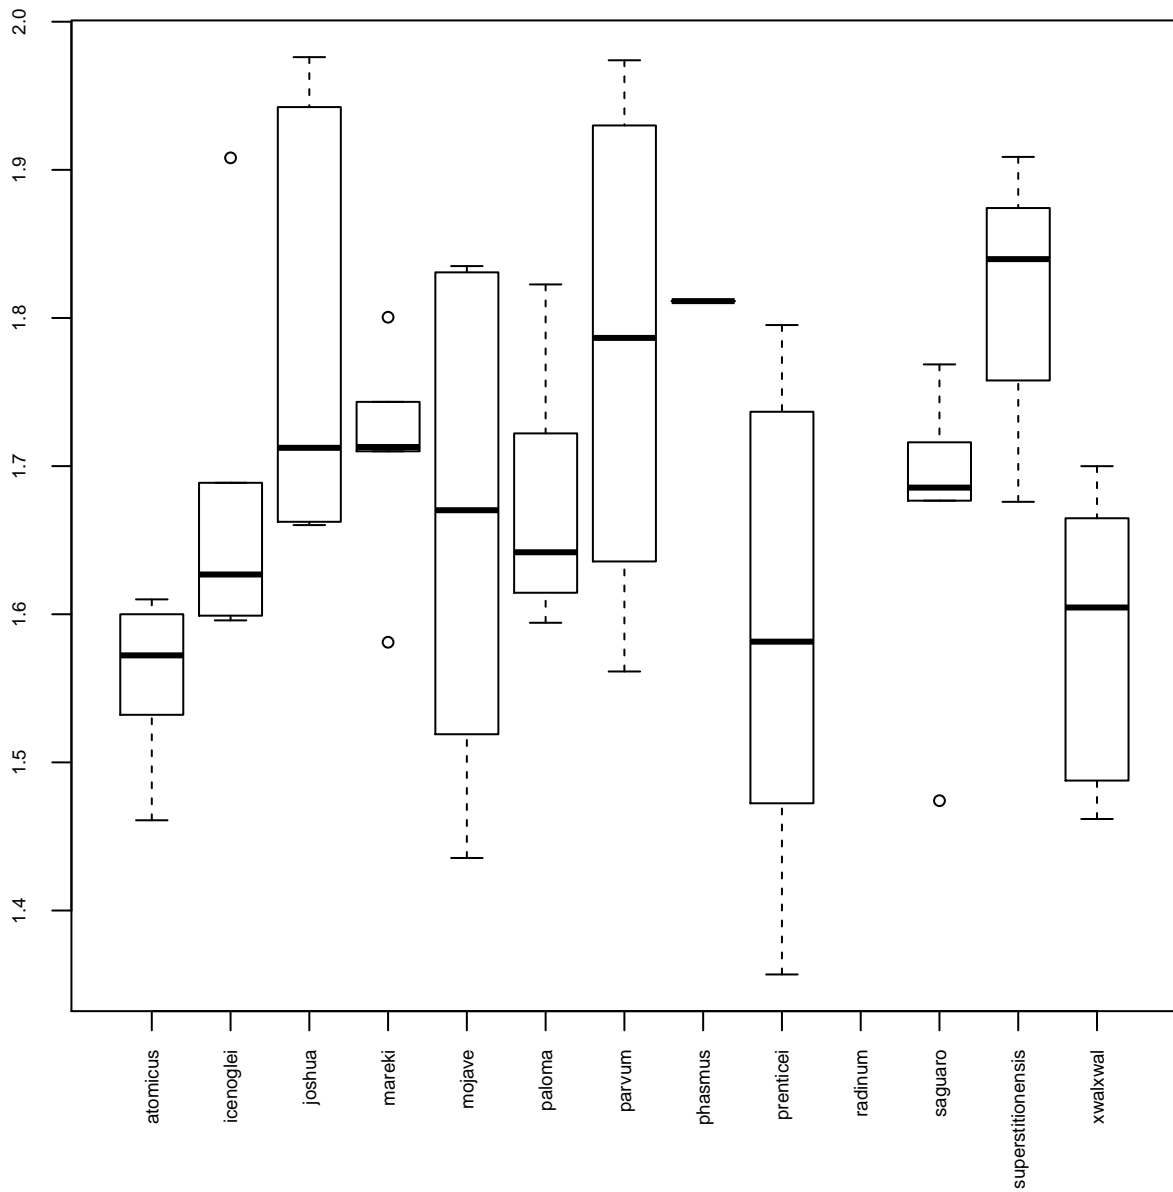

Supplement: Supplementary file 776

## Palpal Tibia/Metatarsus 1 Length ratio – males

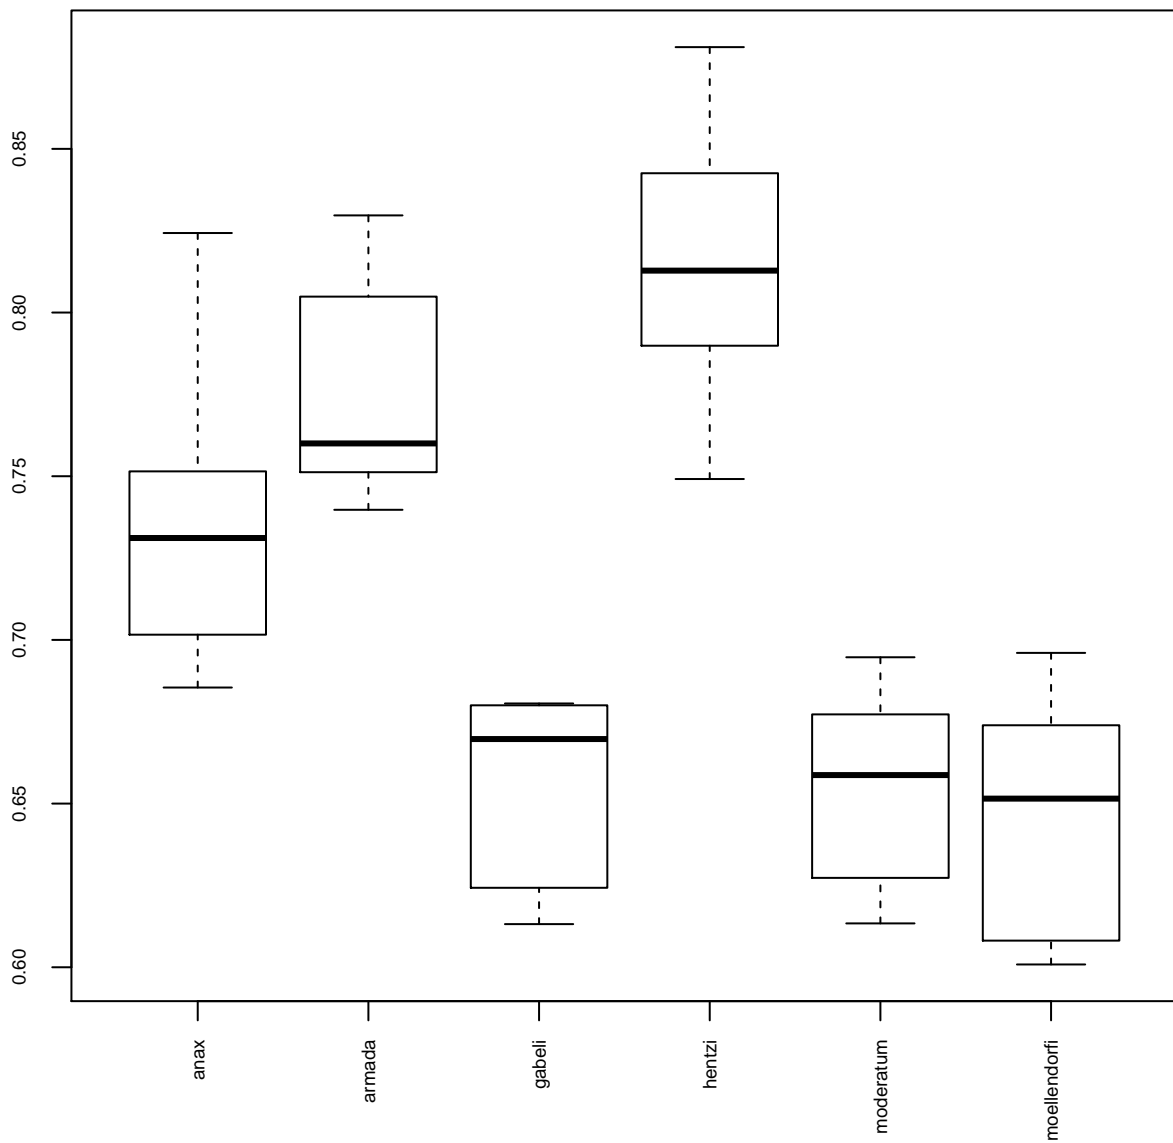

Supplement: Supplementary file 777

## Patella 1/Tarsus 3 Length ratio – males

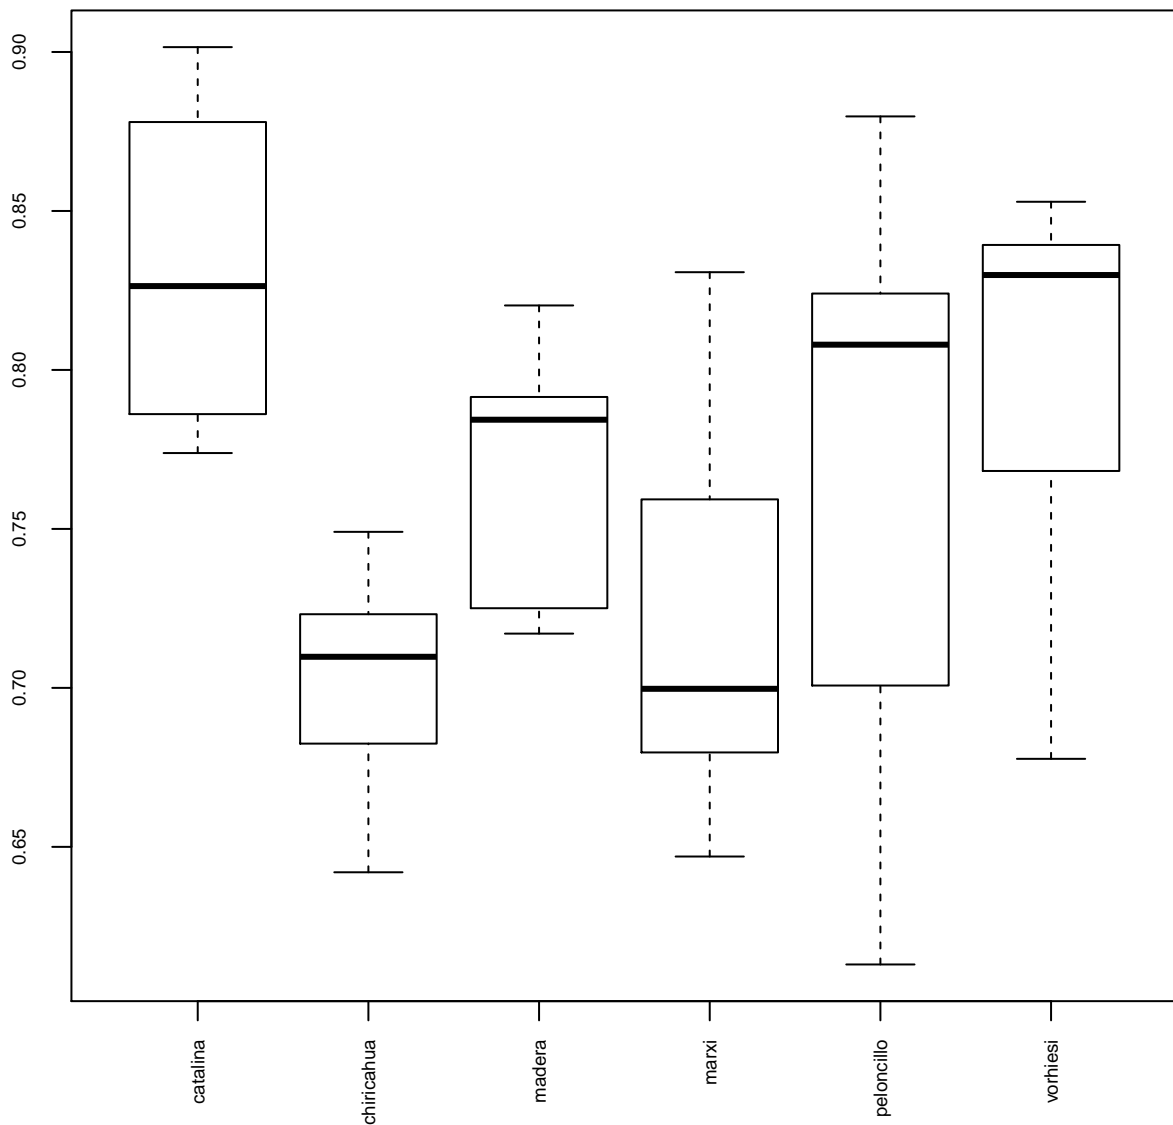

Supplement: Supplementary file 778

## Tarsus 1/Femur 3 Length ratio – males

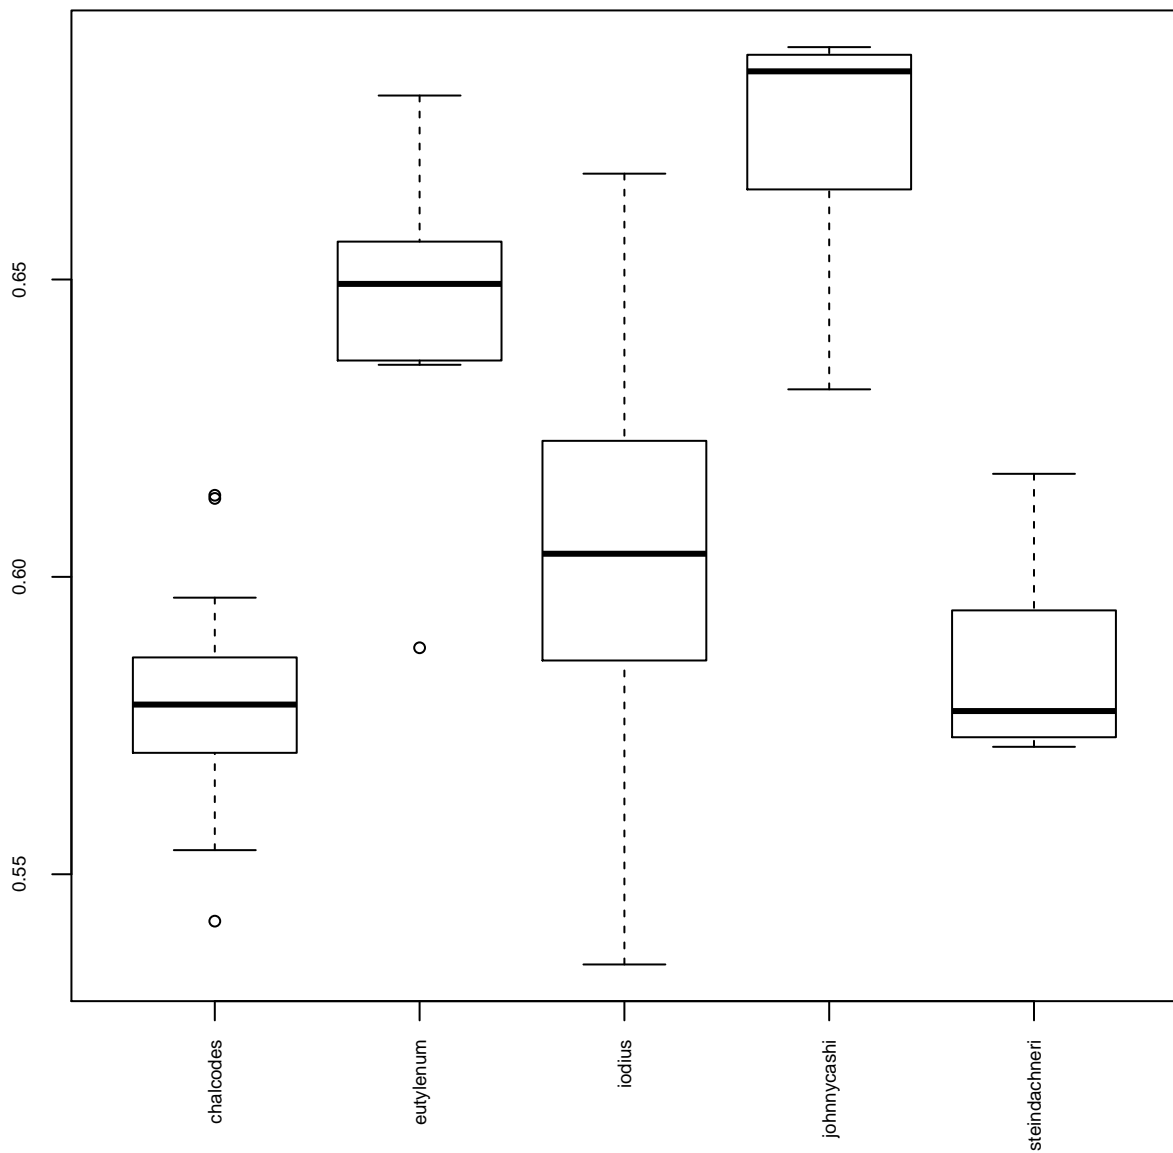

Supplement: Supplementary file 779

## Carapace Length/Width ratio – females

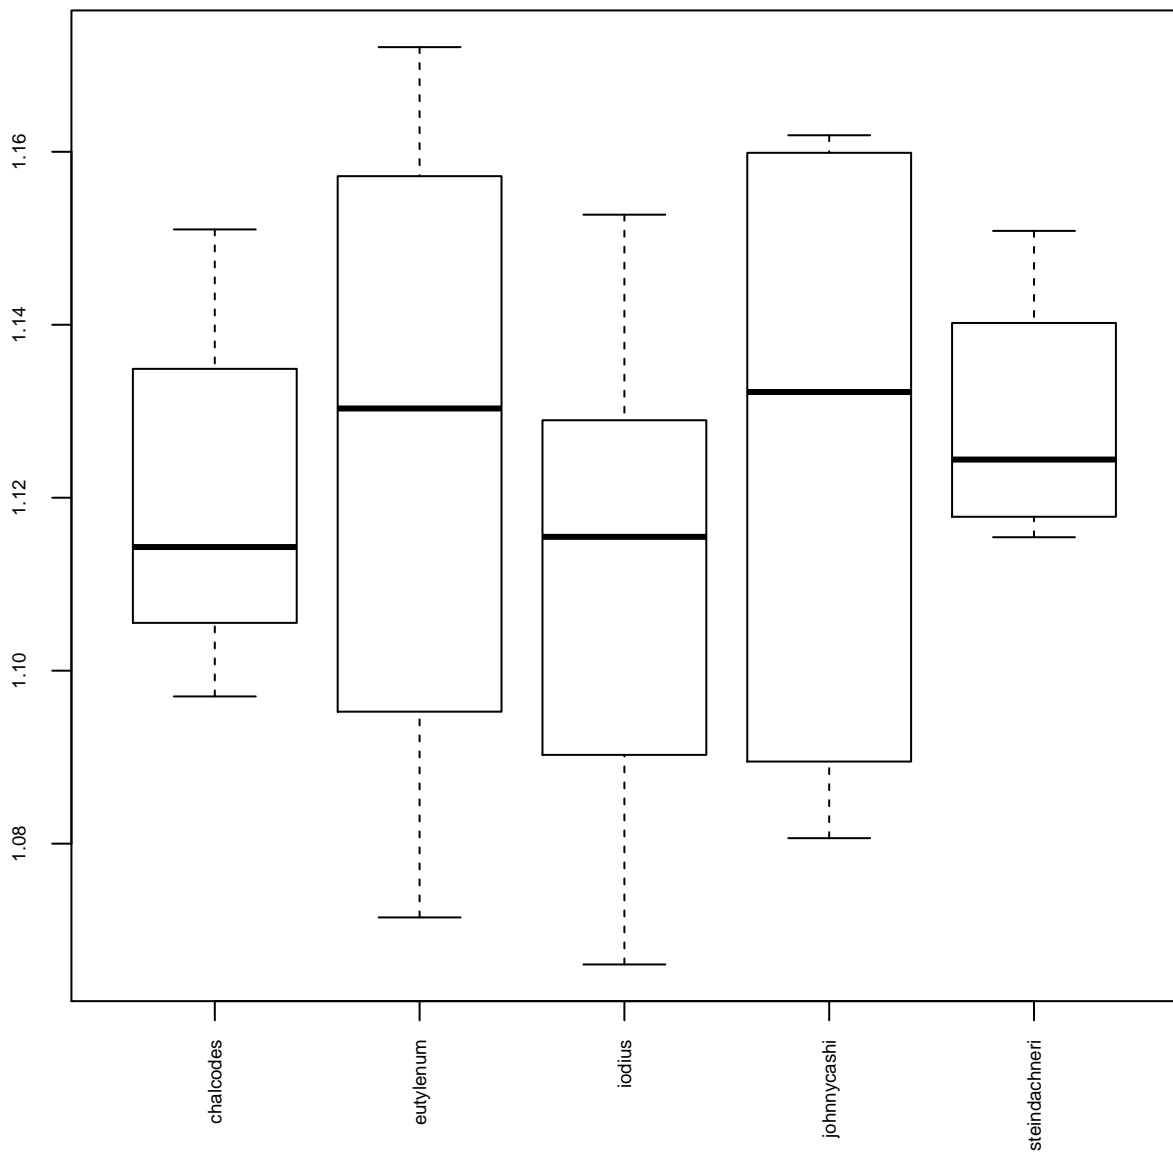

Supplement: Supplementary file 780

## Leg 1/Leg 3 Length ratio – males

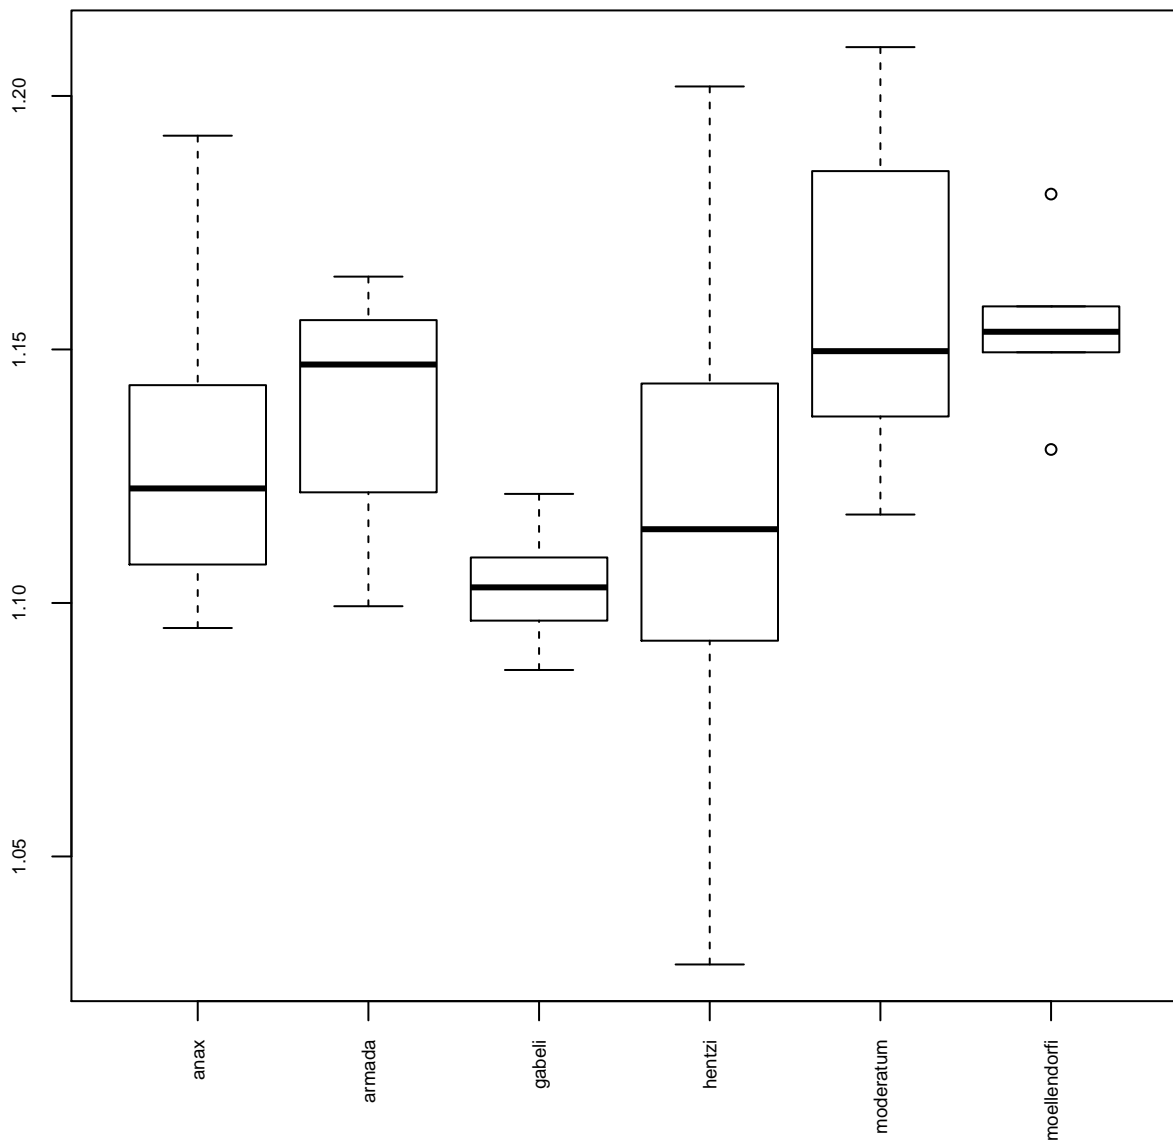

Supplement: Supplementary file 781

## Metatarsus 1/Tarsus 4 Length ratio – females

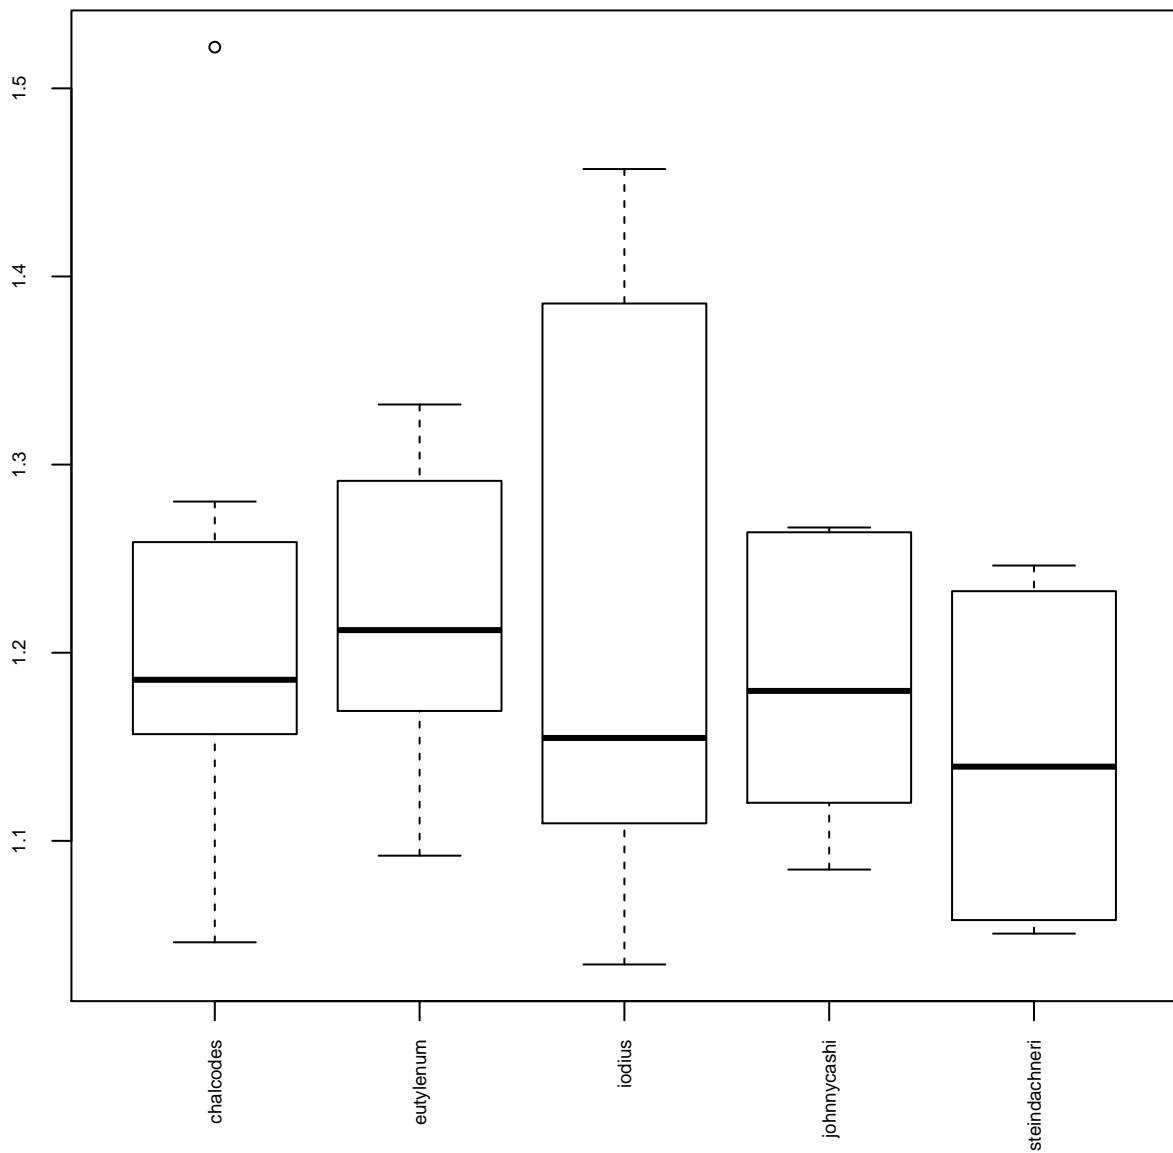

Supplement: Supplementary file 782

# Palpal Tibia/Tibia 3 Length ratio – males

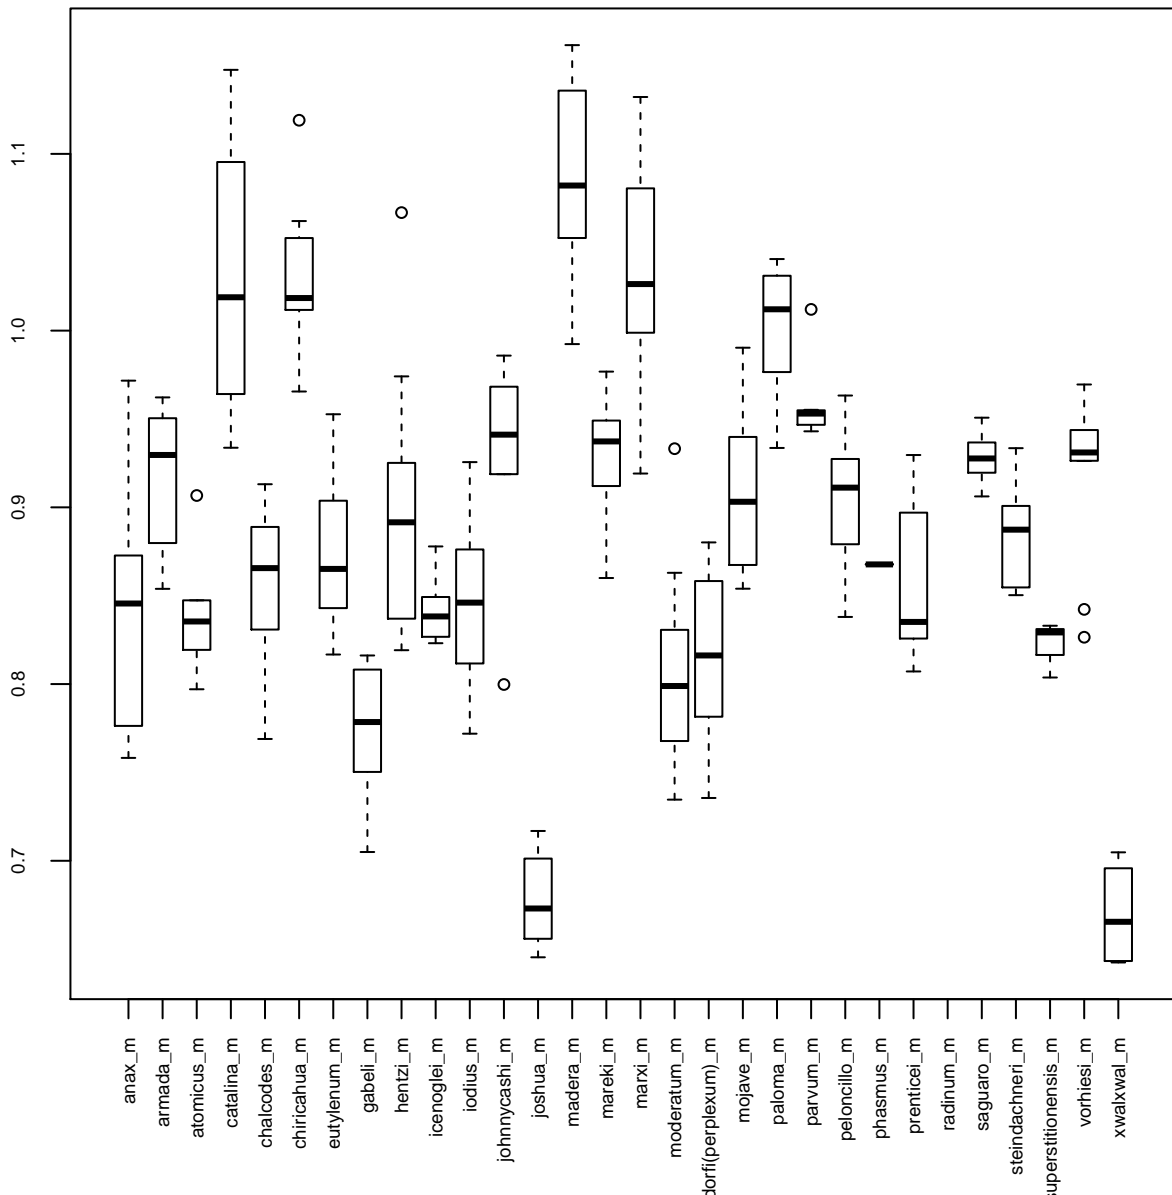

Supplement: Supplementary file 783

## Patella 4/Tibia 4 ratio – females

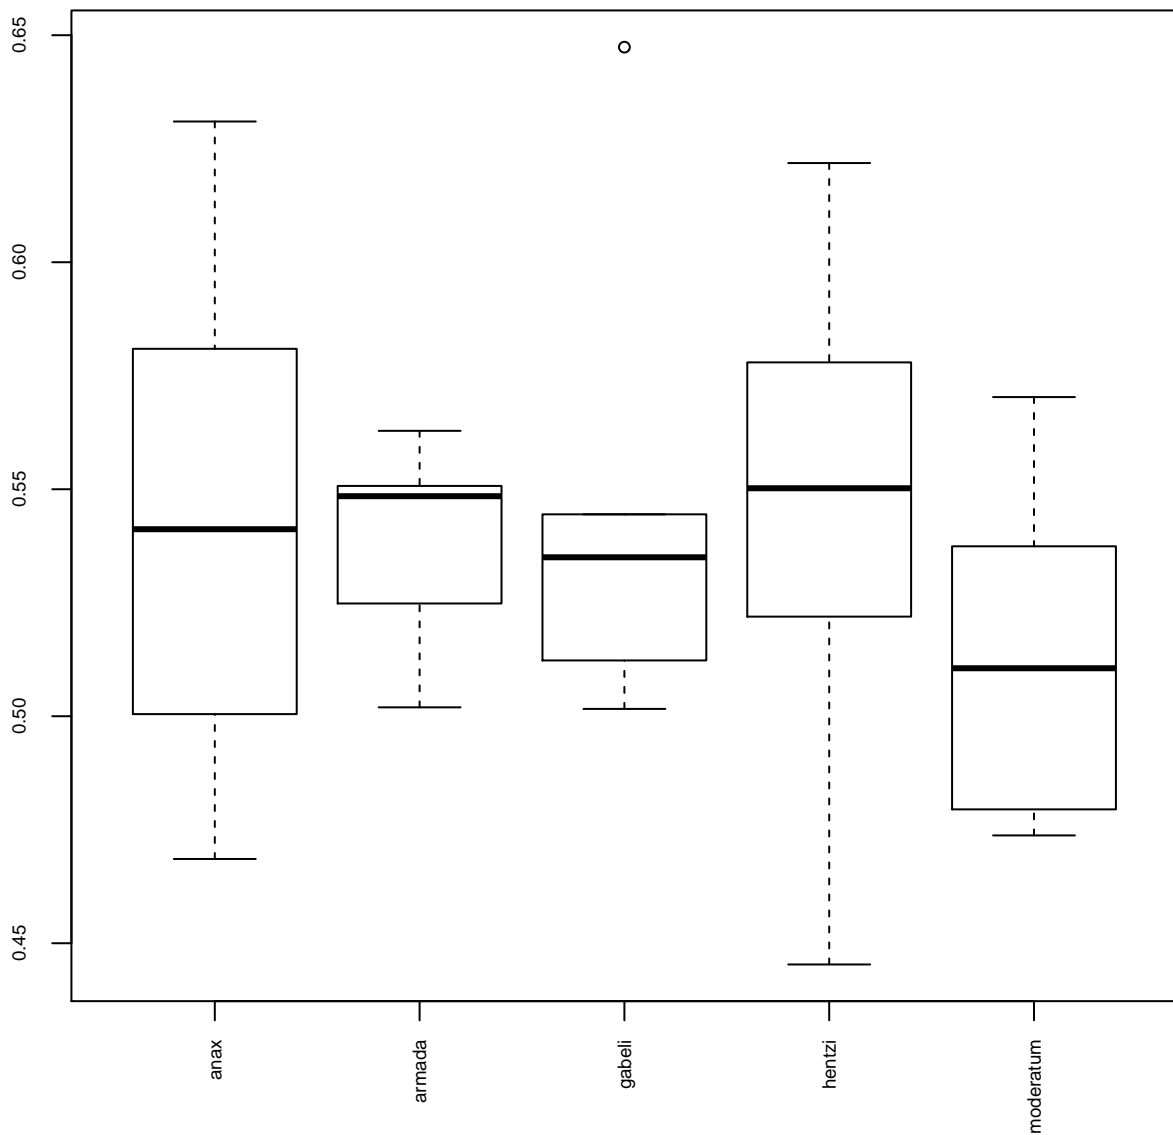

Supplement: Supplementary file 784

## Carapace Length/Tibia 4 ratio – females

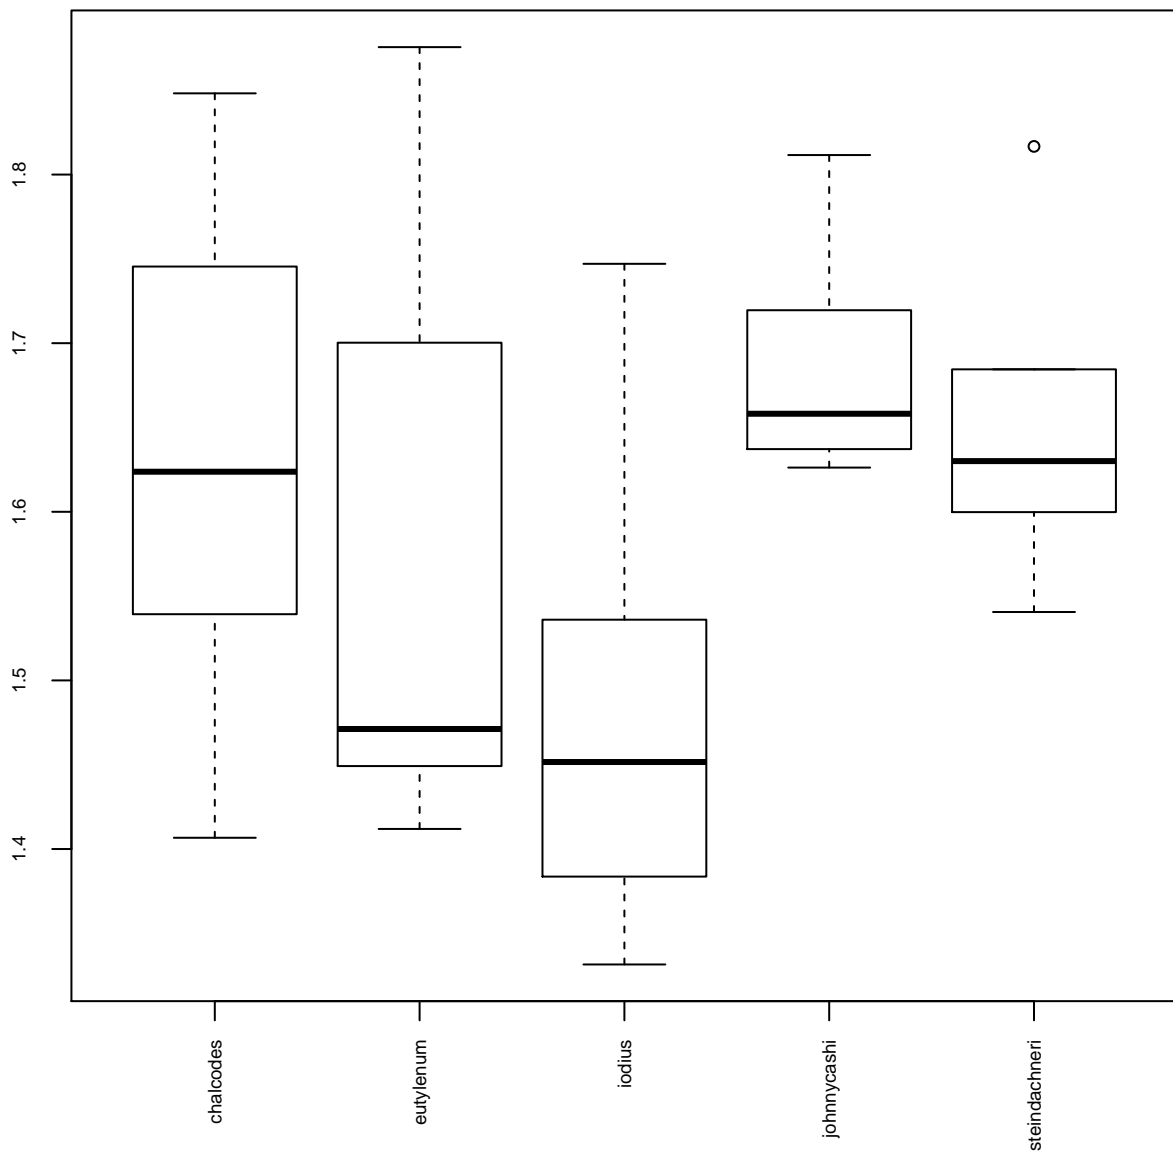

Supplement: Supplementary file 785

## Leg 1/Leg 3 Length ratio – females

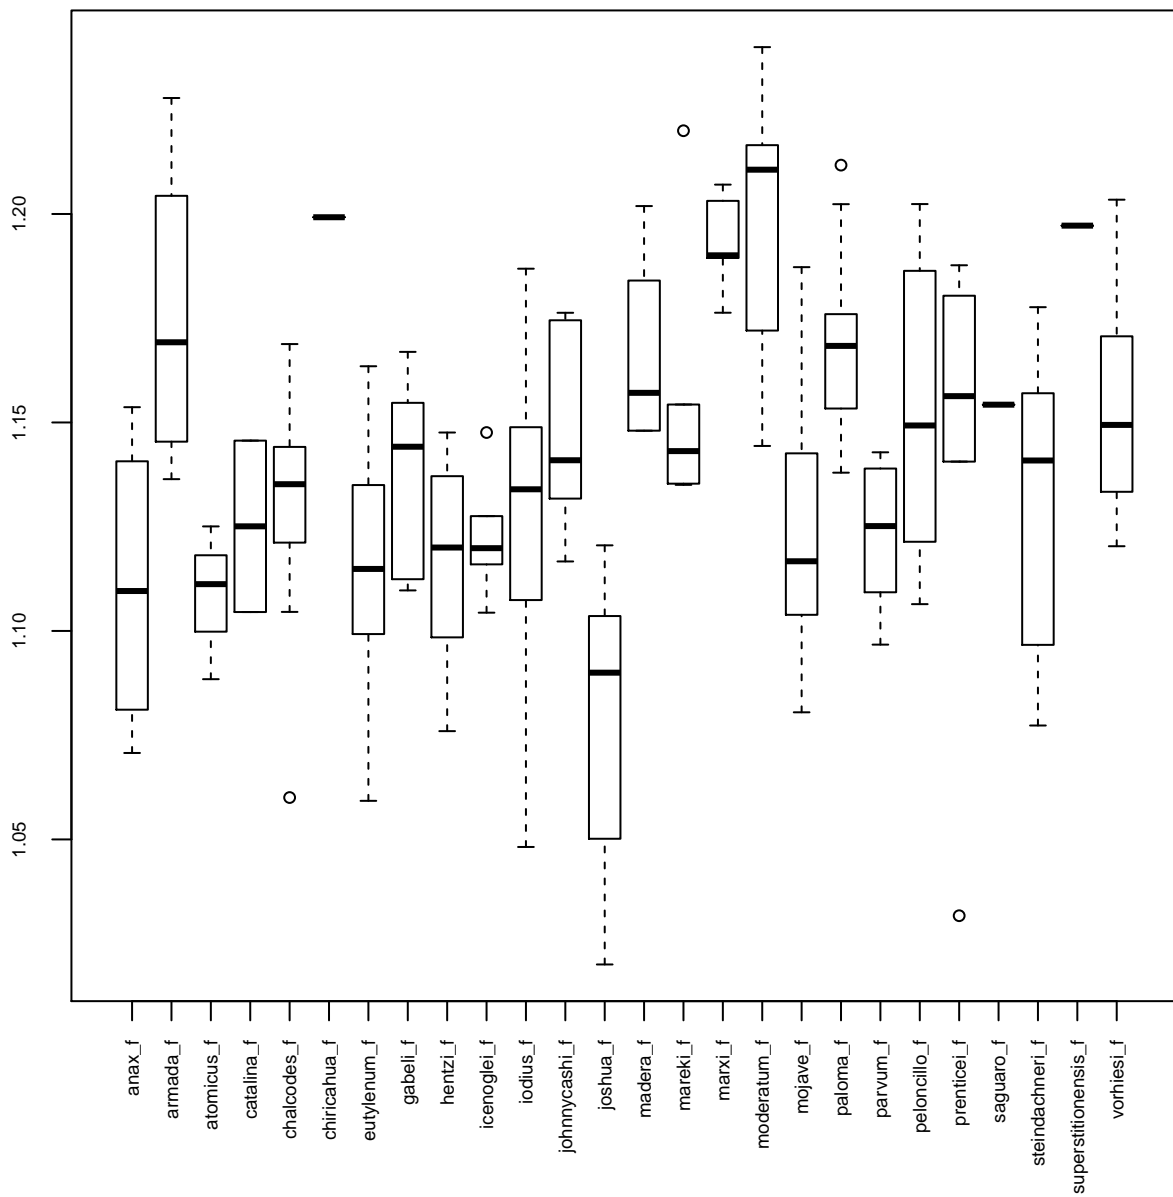

Supplement: Supplementary file 786

## Femur 1 Length/Width ratio – females

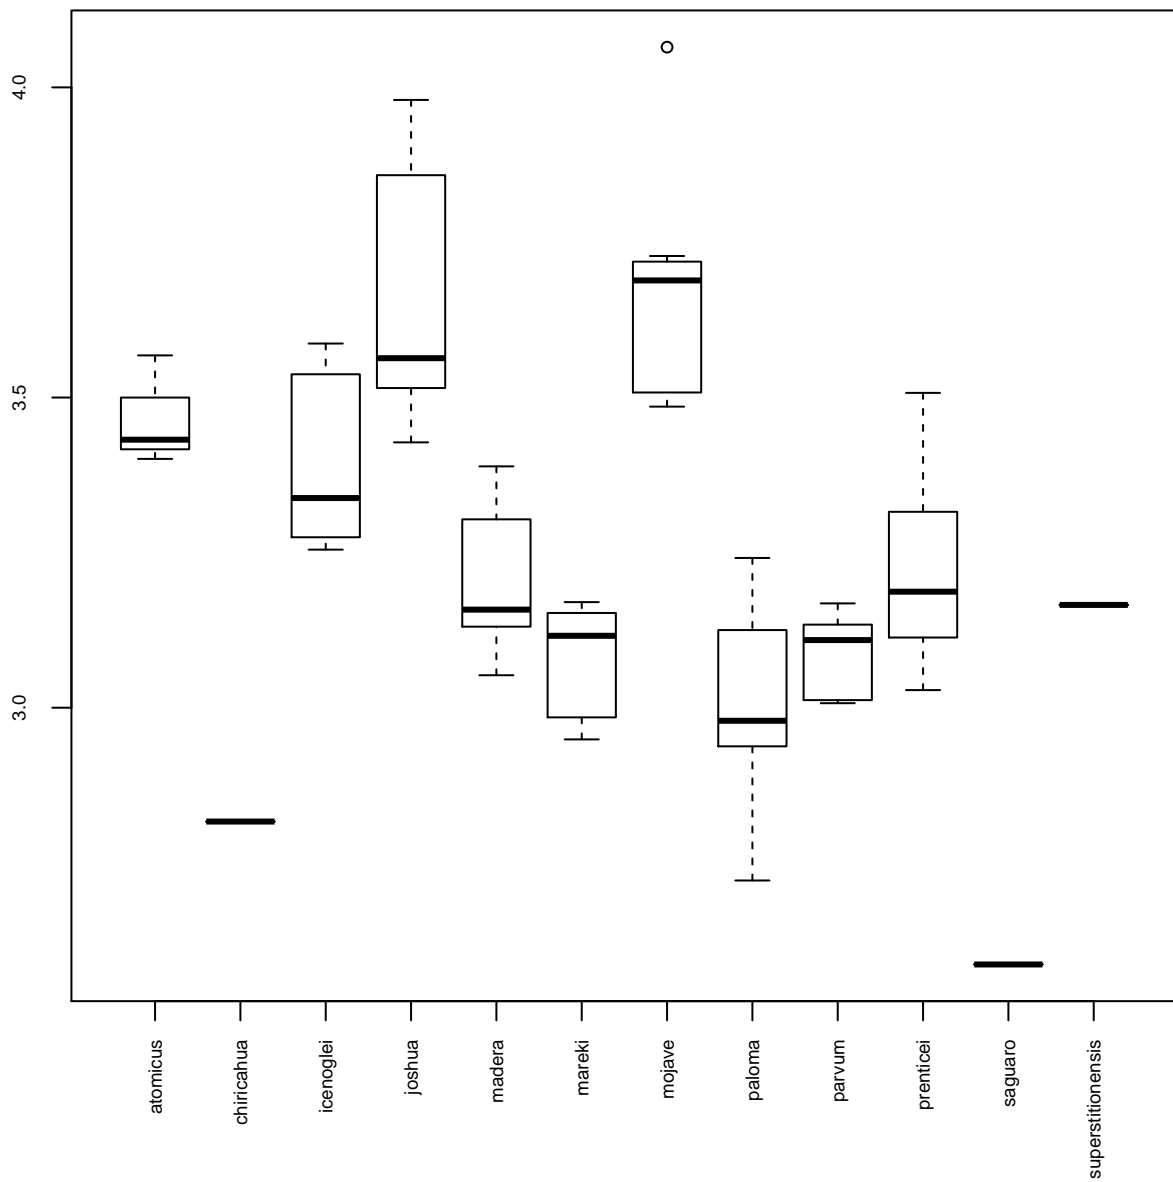

Supplement: Supplementary file 787

# Metatarsus 3/Patella 4 Length ratio – males

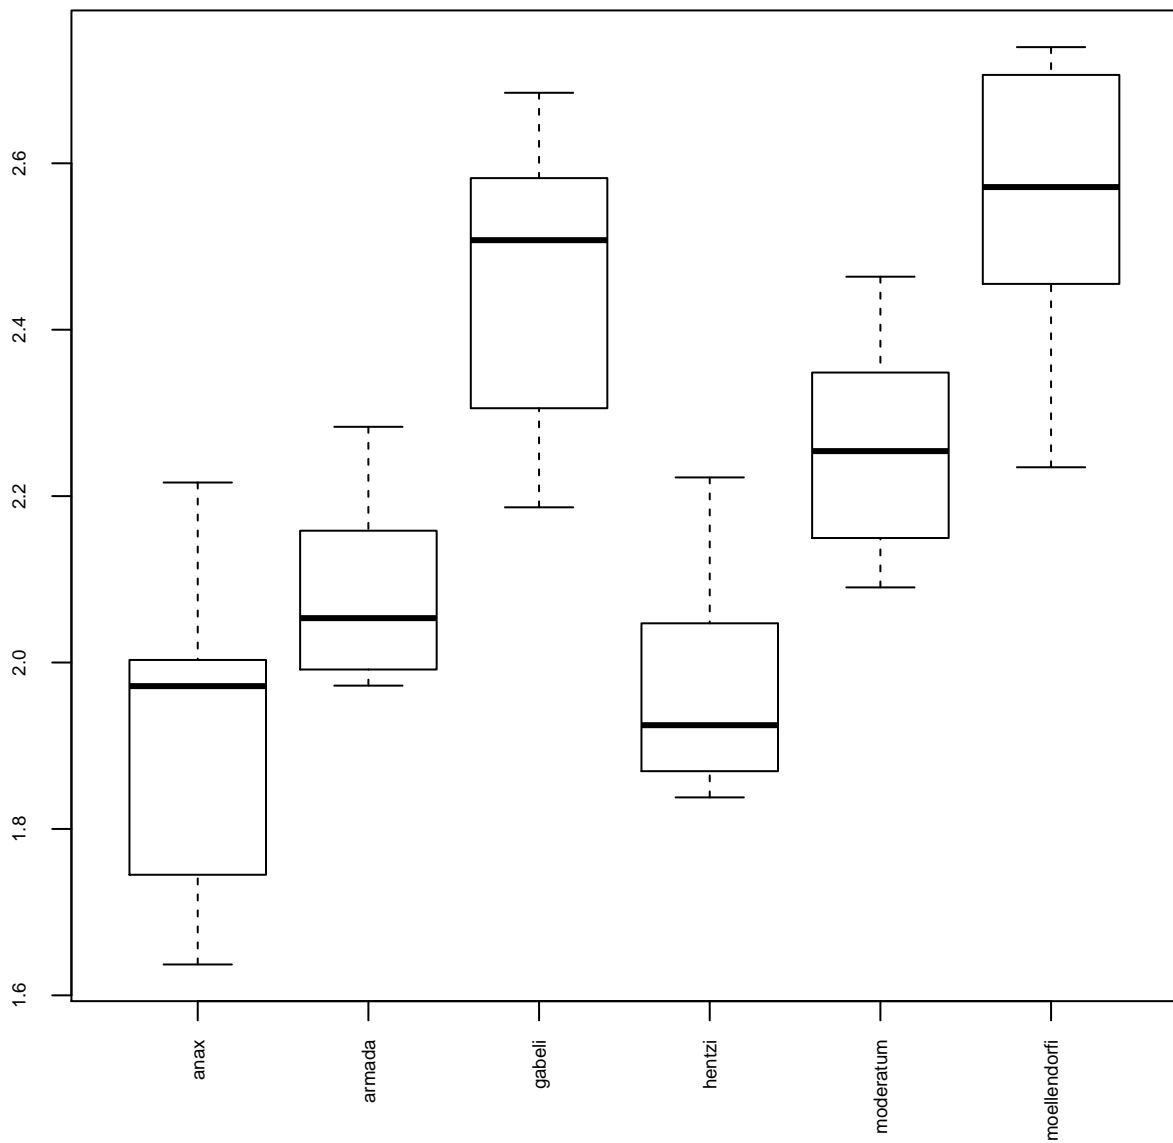

Supplement: Supplementary file 788

## Metatarsus 1/Tarsus 1 ratio – females

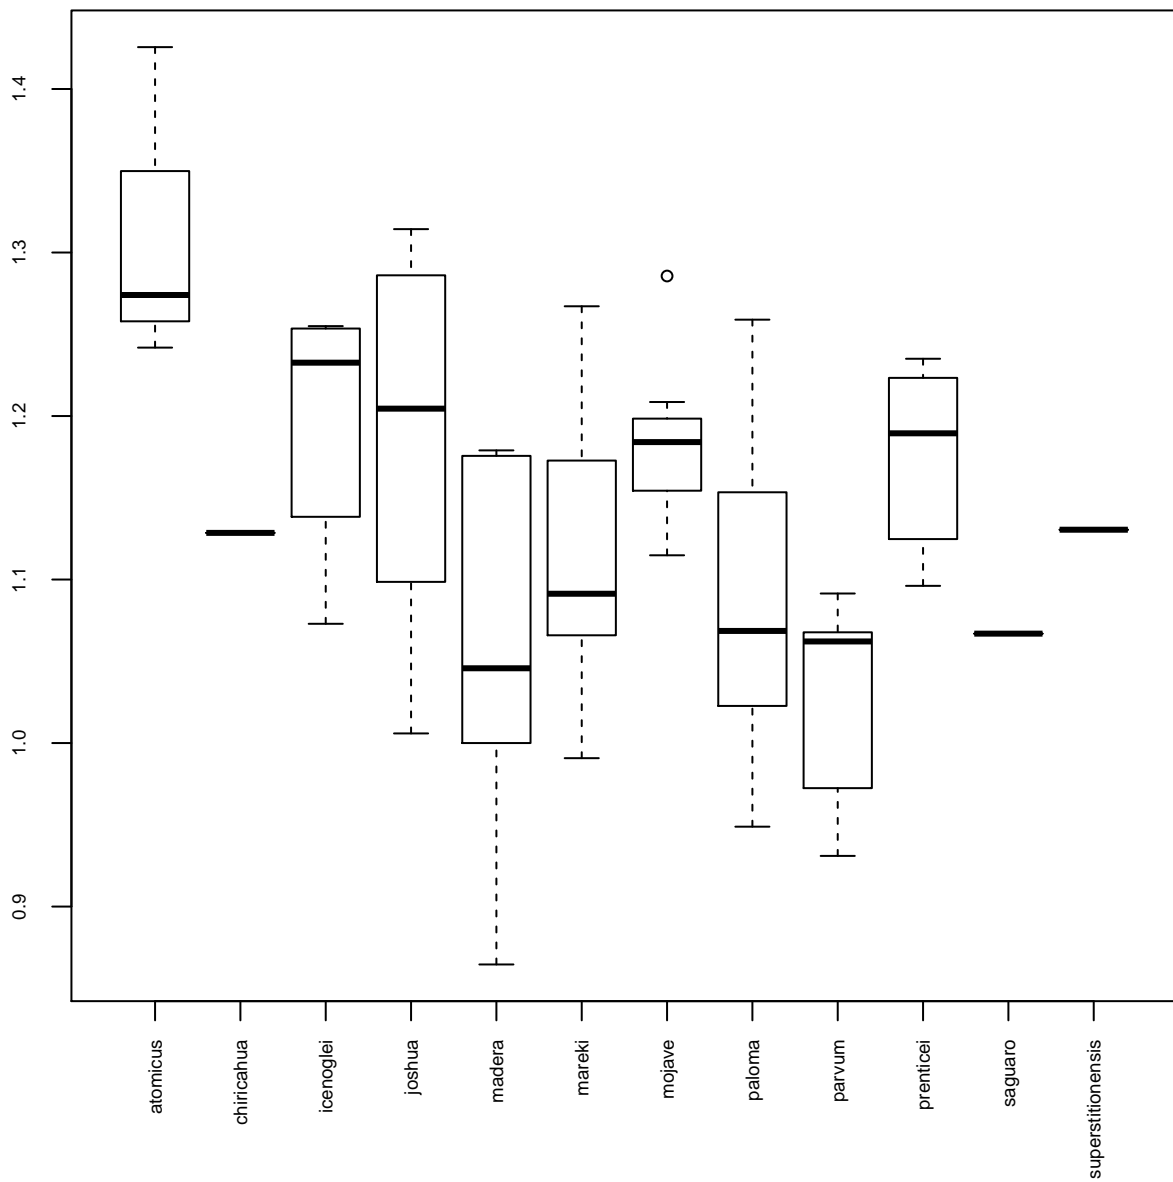

Supplement: Supplementary file 789

# Tarsus 1/Tarsus 4 ratio – males

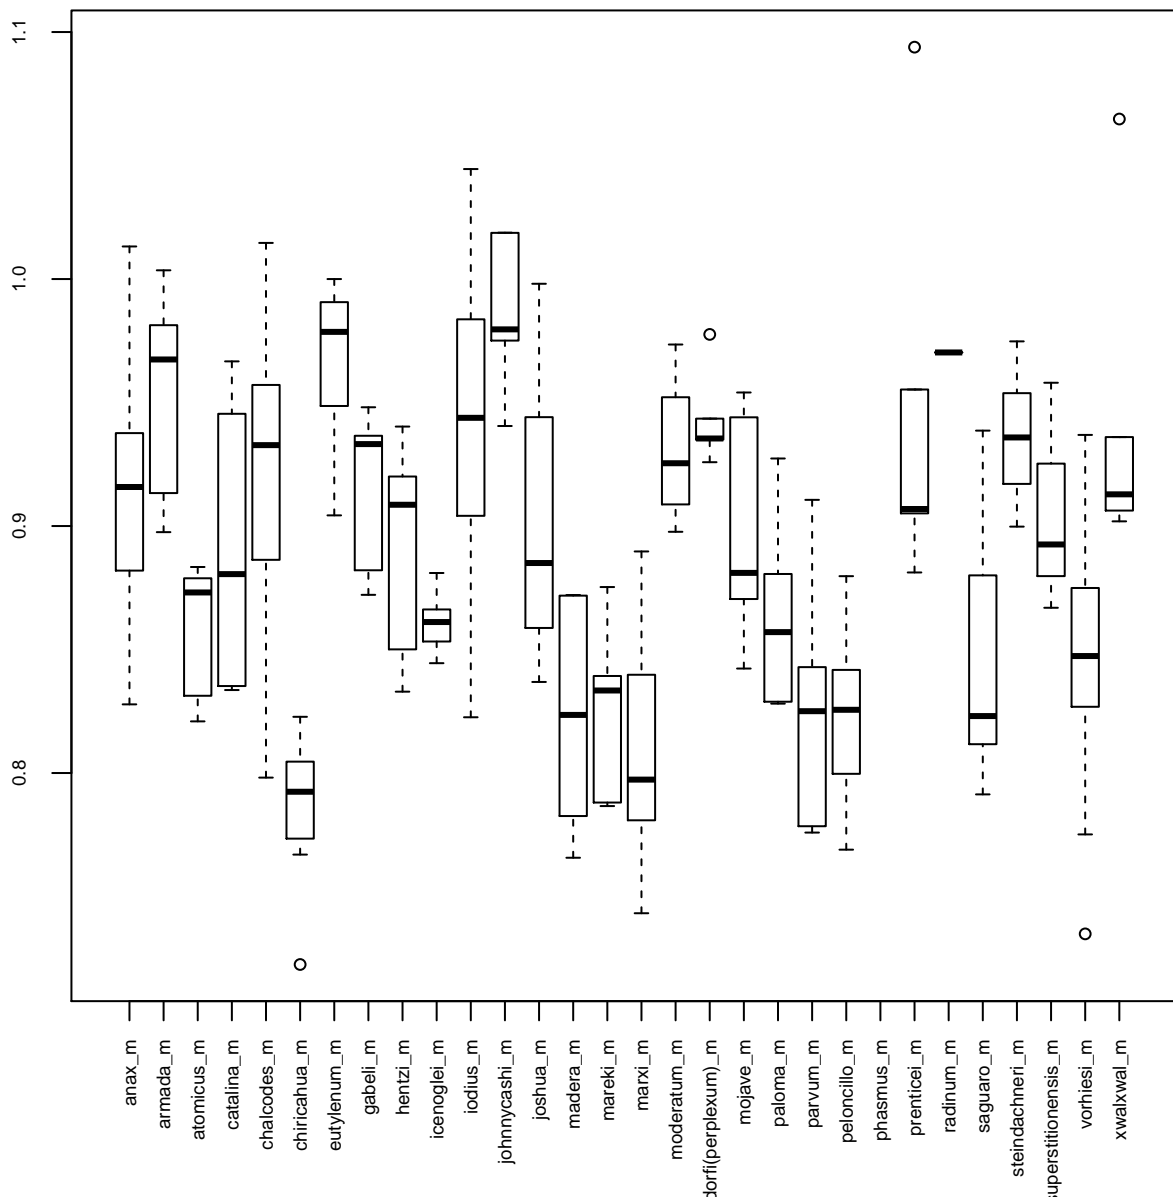

Supplement: Supplementary file 790

## Metatarsus 3/Patella 4 Length ratio – females

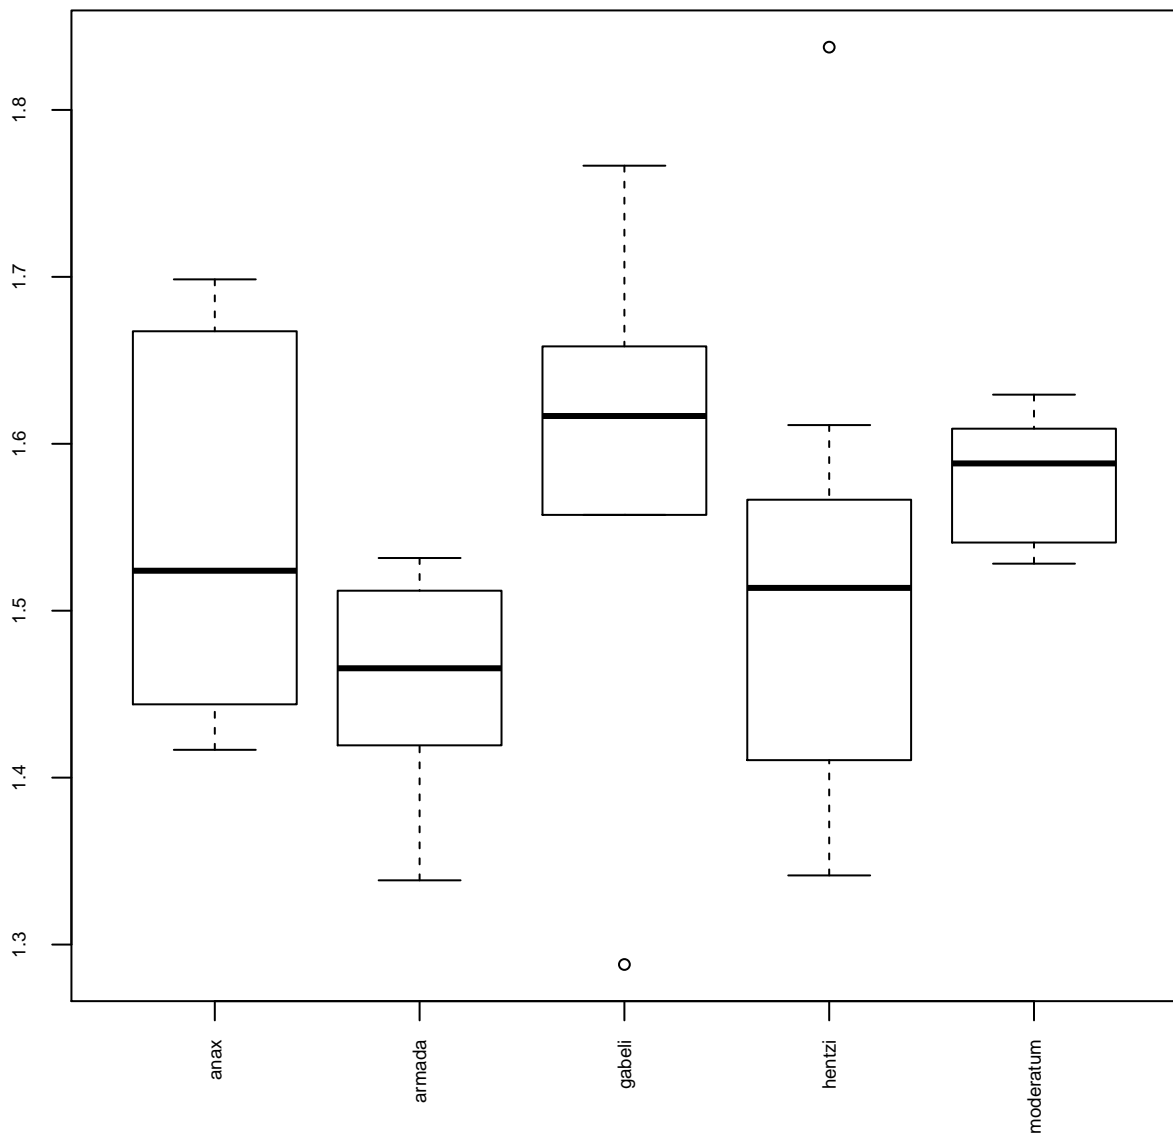

Supplement: Supplementary file 791

## Tarsus 1/Metatarsus 4 Length ratio – males

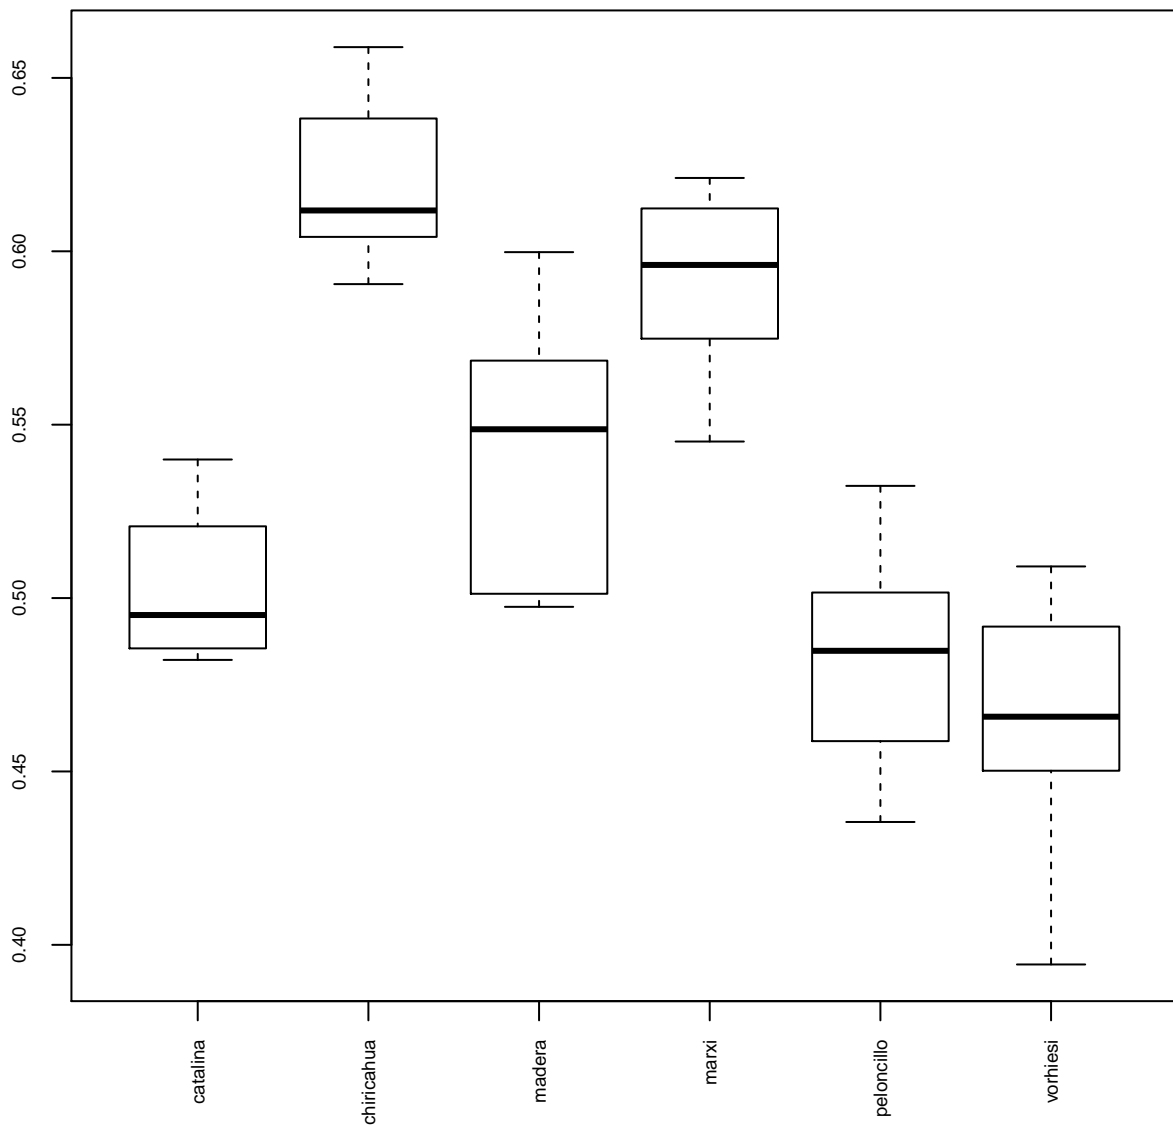

Supplement: Supplementary file 792

## Tibia 3/Tarsus 3 ratio – females

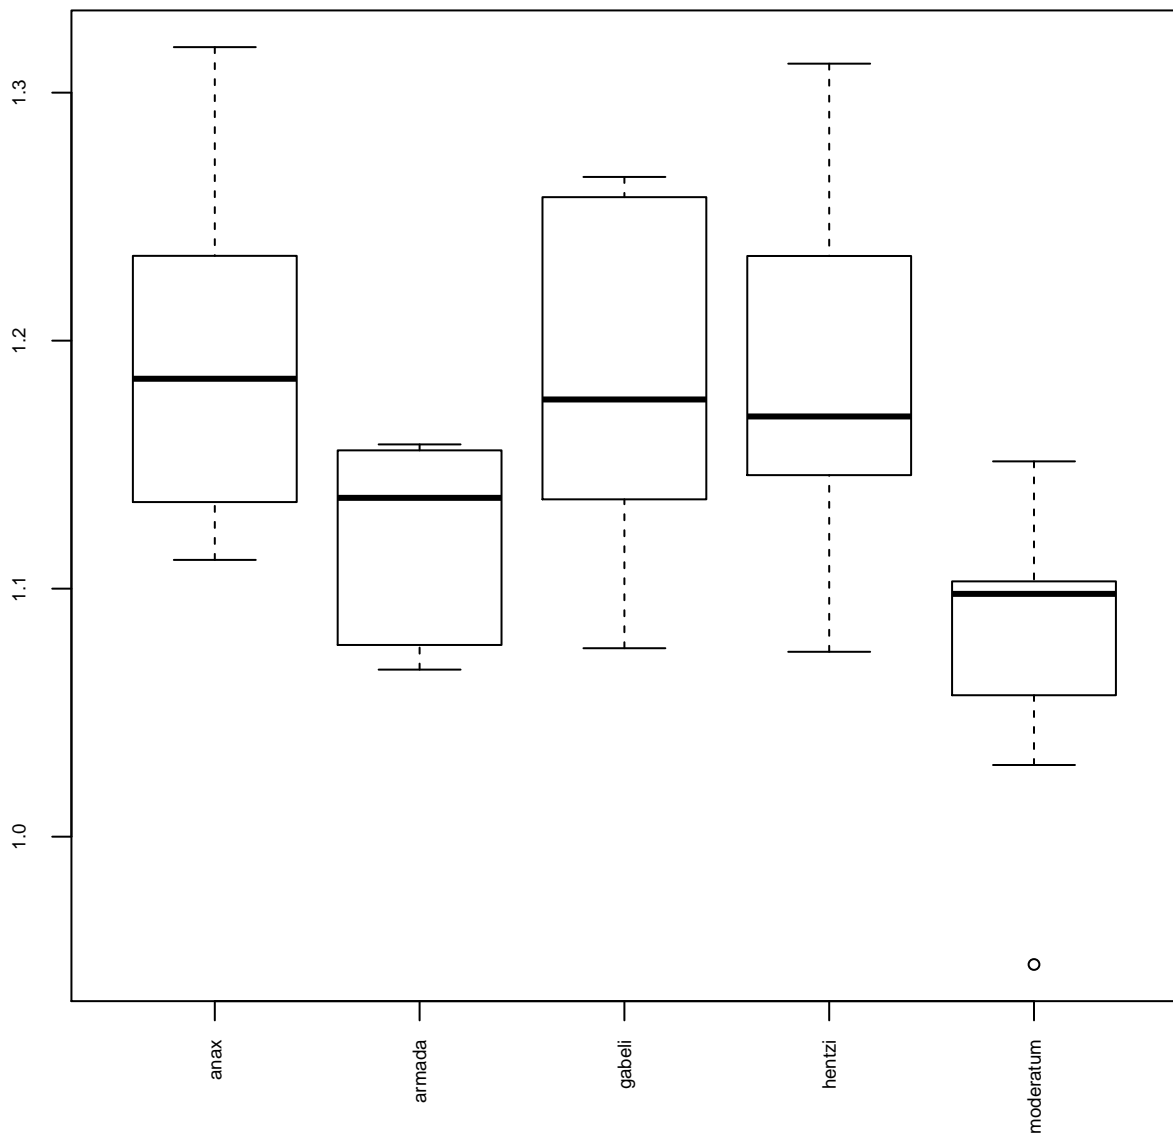

Supplement: Supplementary file 793

## Metatarsus 1/Femur 4 Length ratio – males

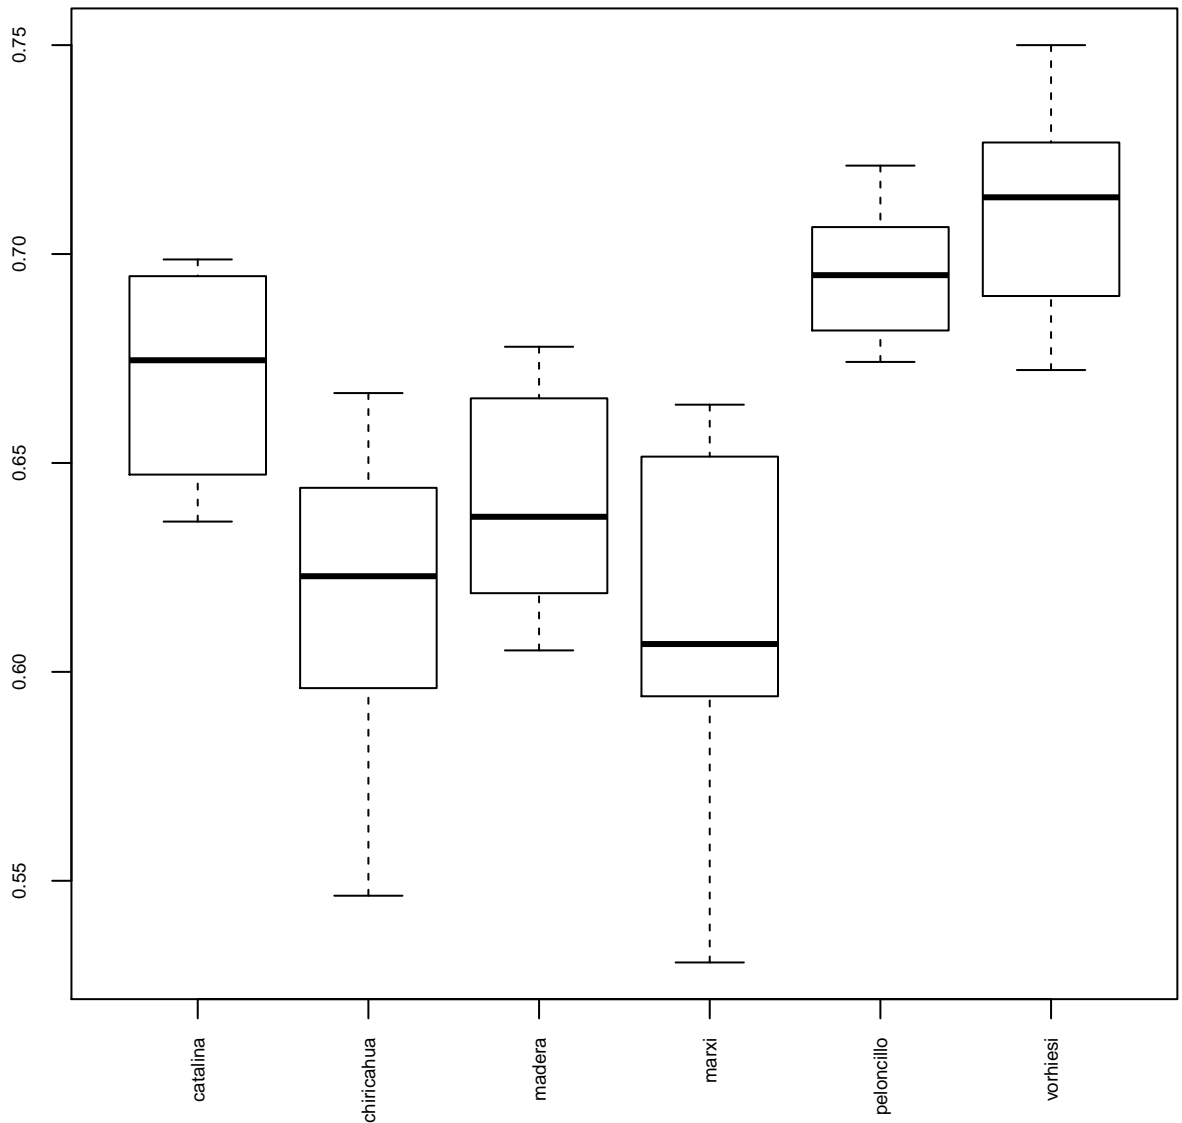

Supplement: Supplementary file 794

## Femur 1/Metatarsus 1 ratio – females

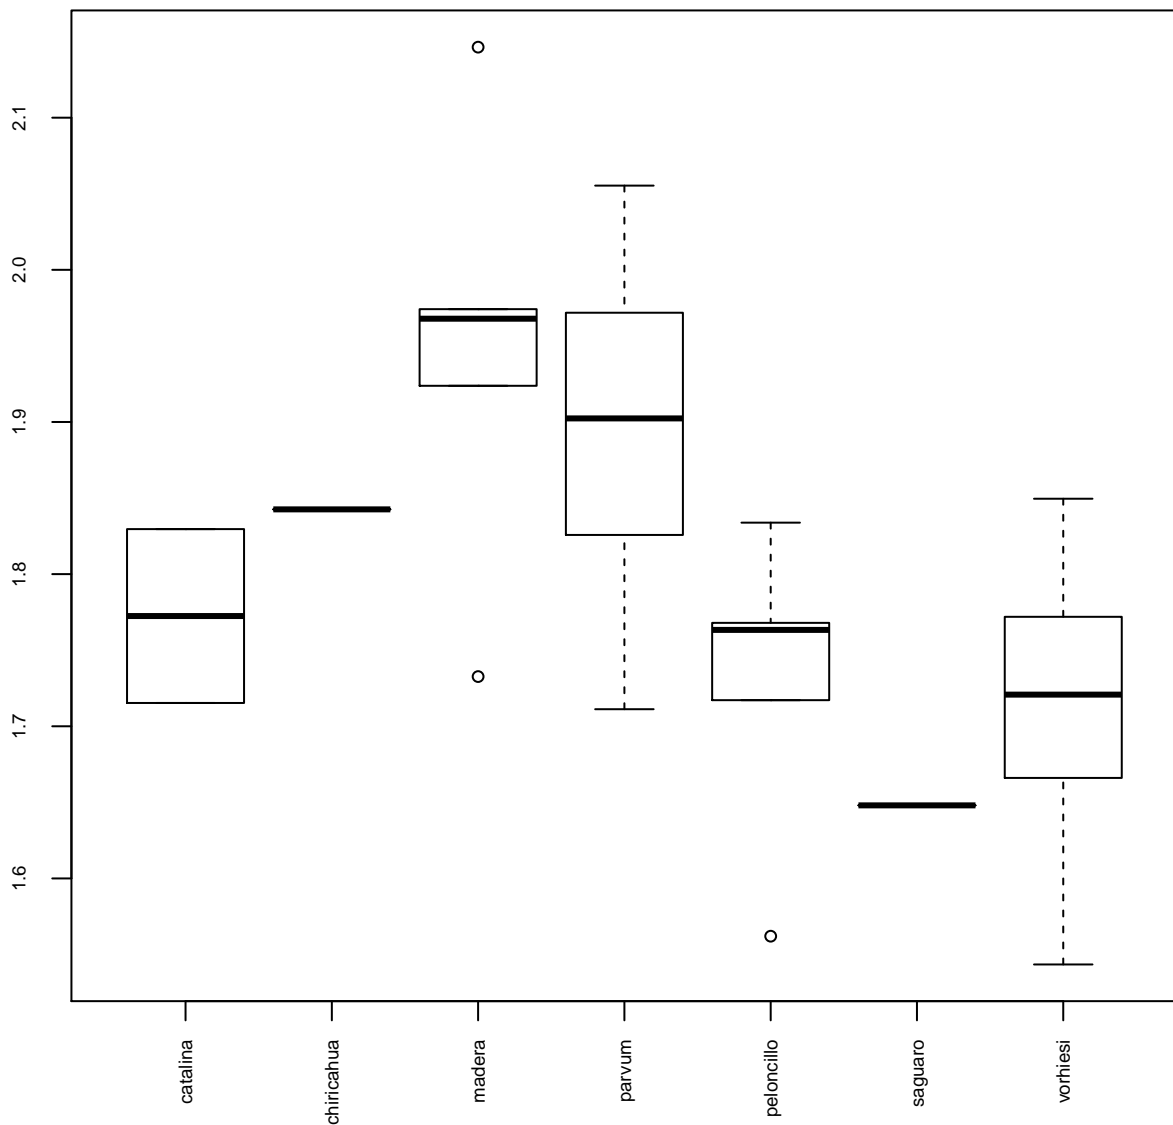

Supplement: Supplementary file 795

# Femur 3/Tibia 3 ratio – males

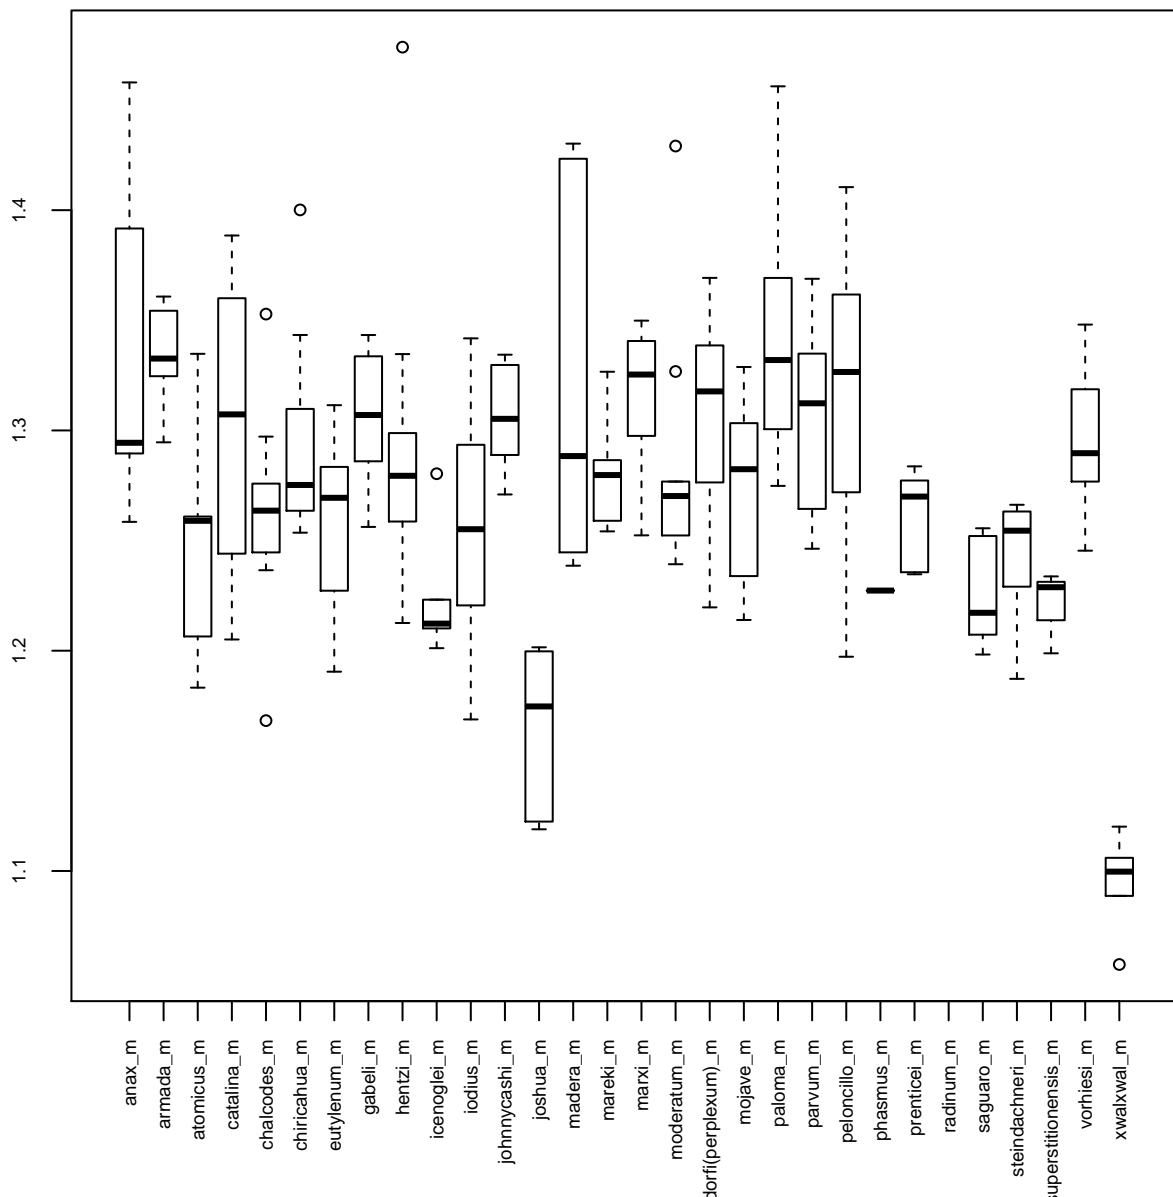

Supplement: Supplementary file 796

# Femur 4/Metatarsus 4 ratio – females

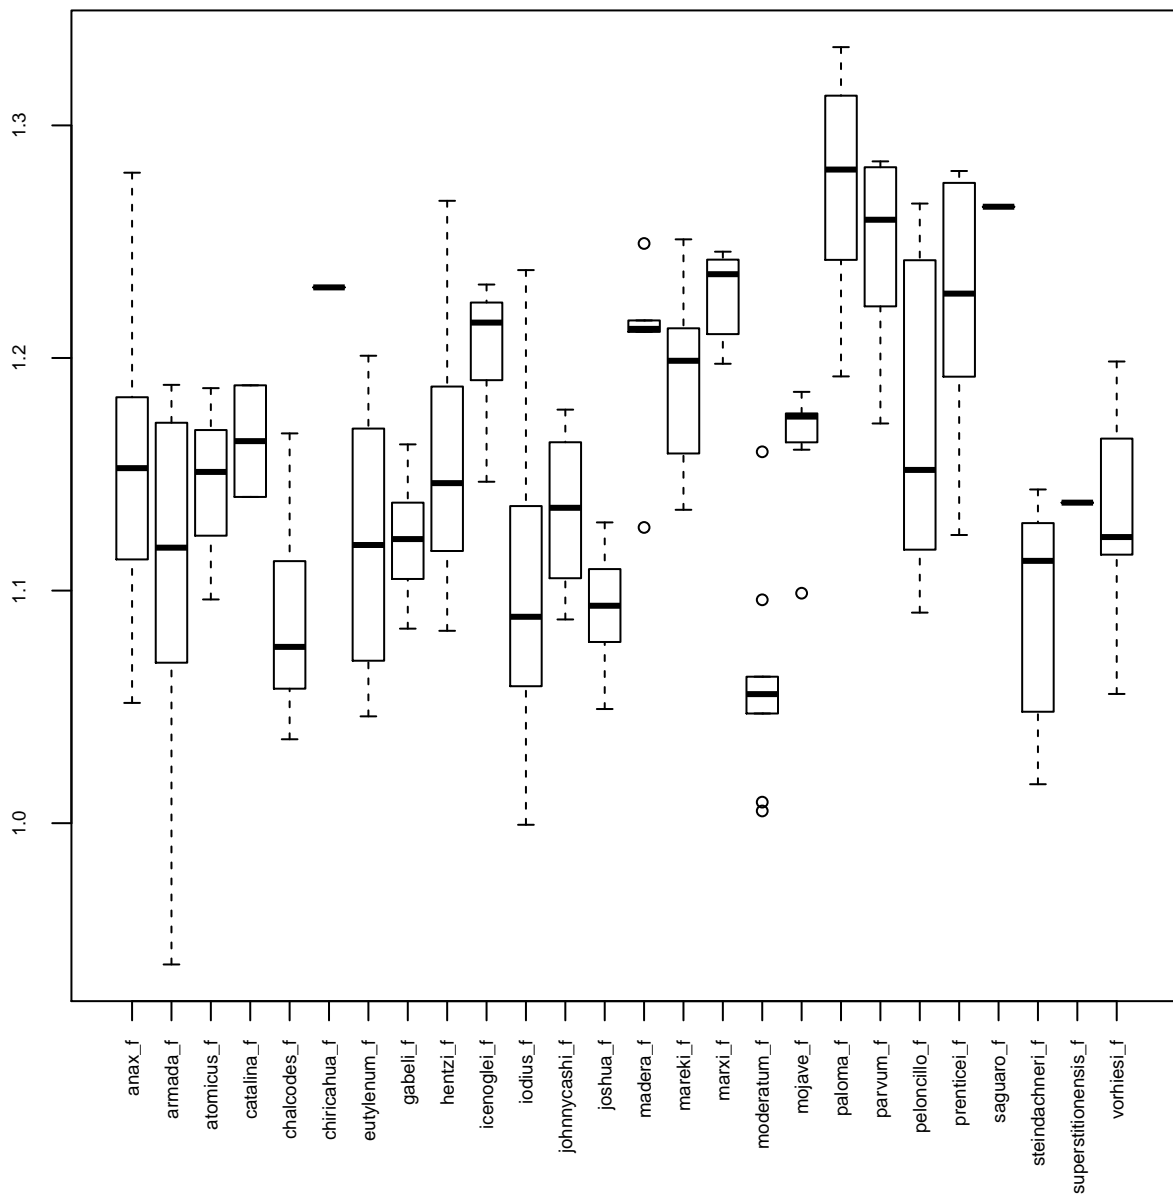

Supplement: Supplementary file 797

# Metatarsus 3/Femur 4 Length ratio – females

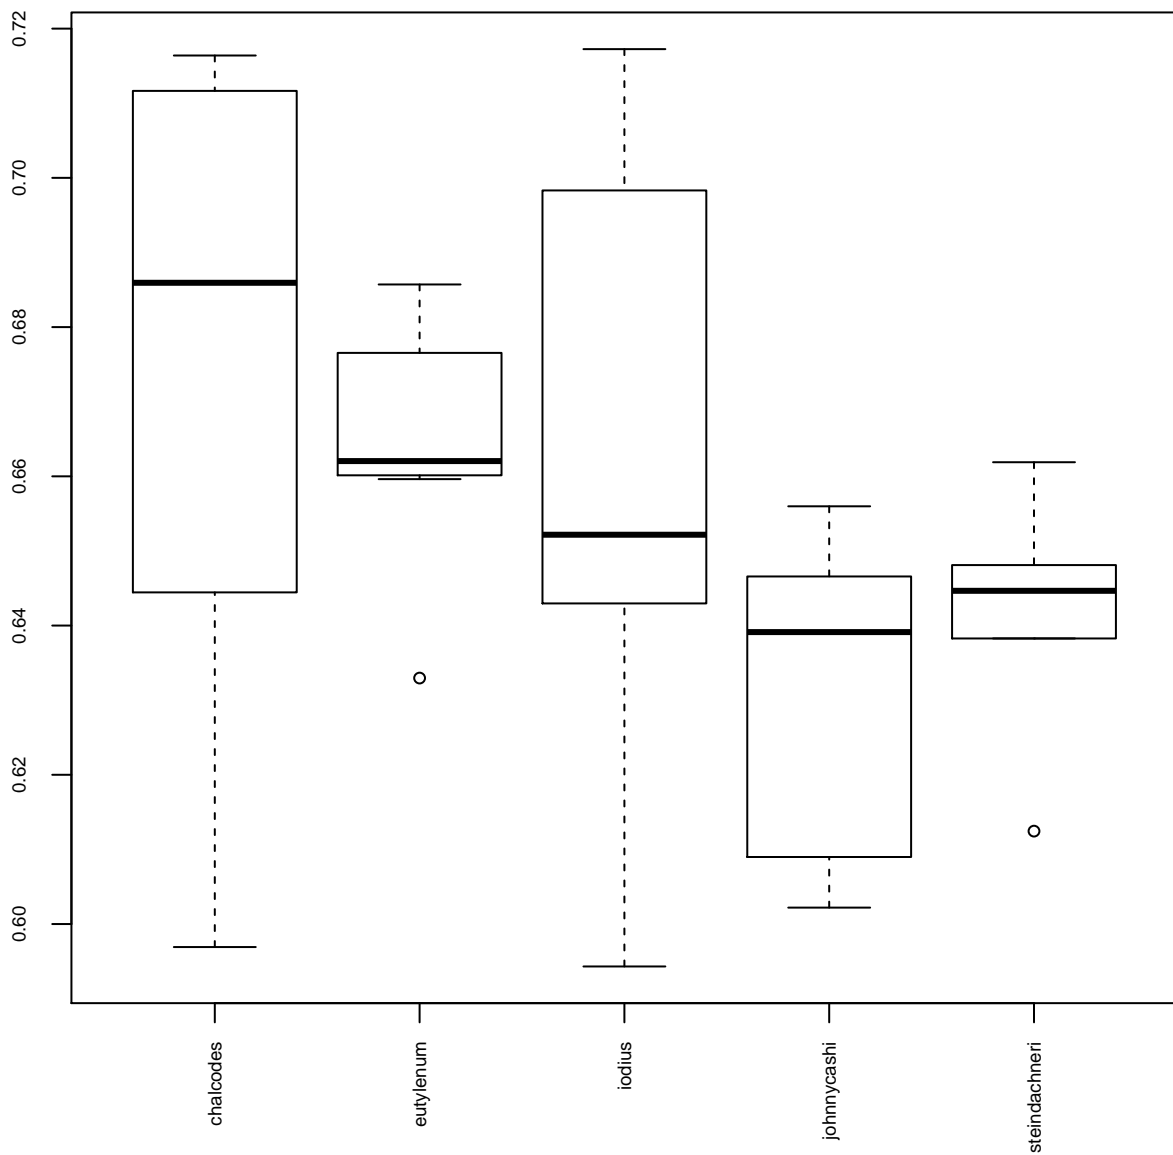

Supplement: Supplementary file 798

## Metatarsus 1/Tarsus 1 ratio – females

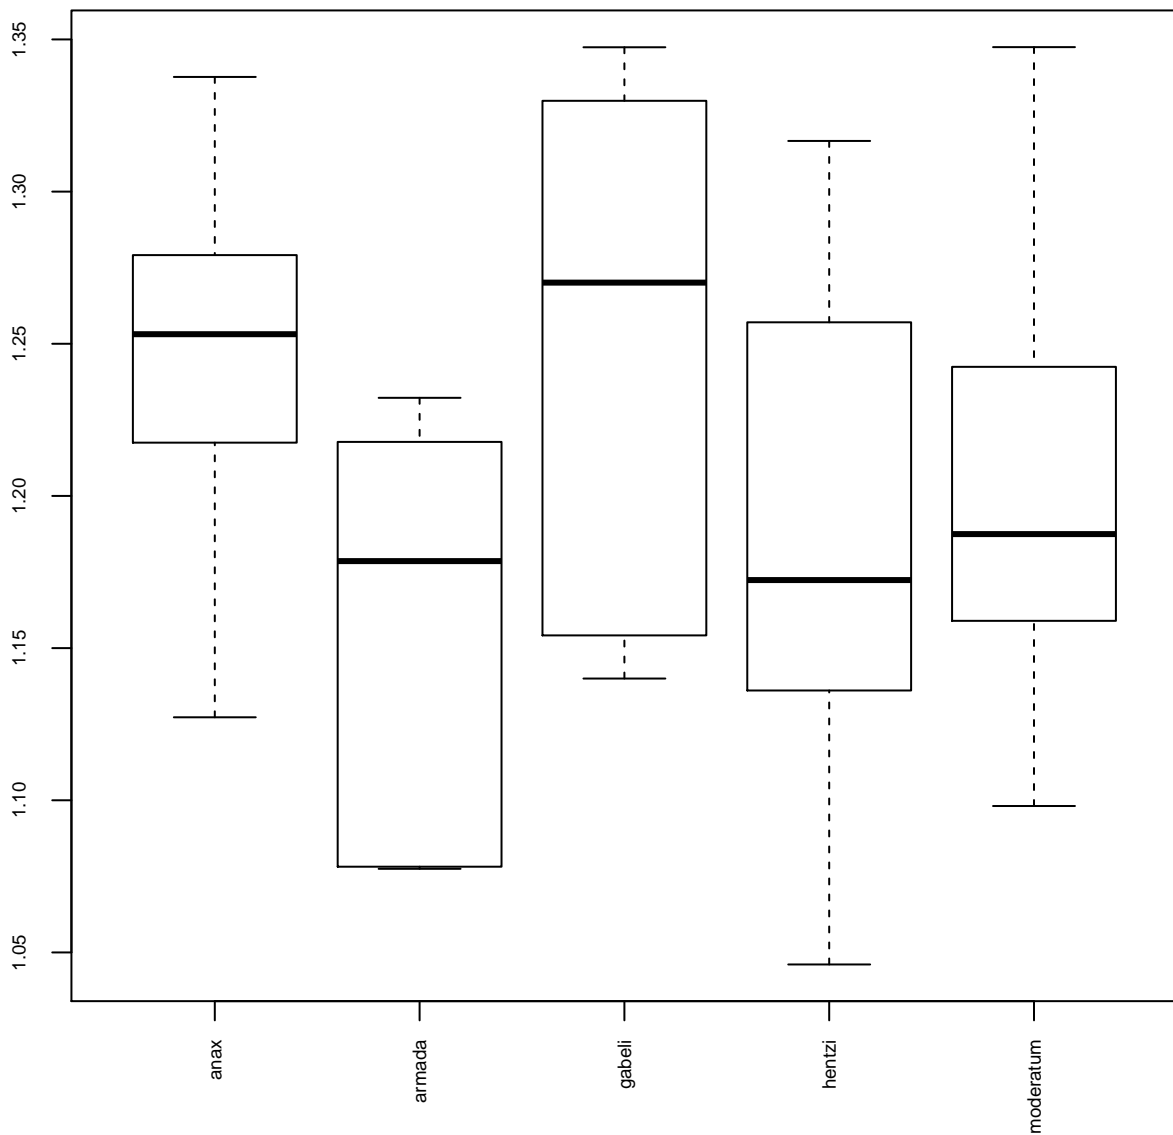

Supplement: Supplementary file 799

## Patella 3/Tarsus 4 Length ratio – females

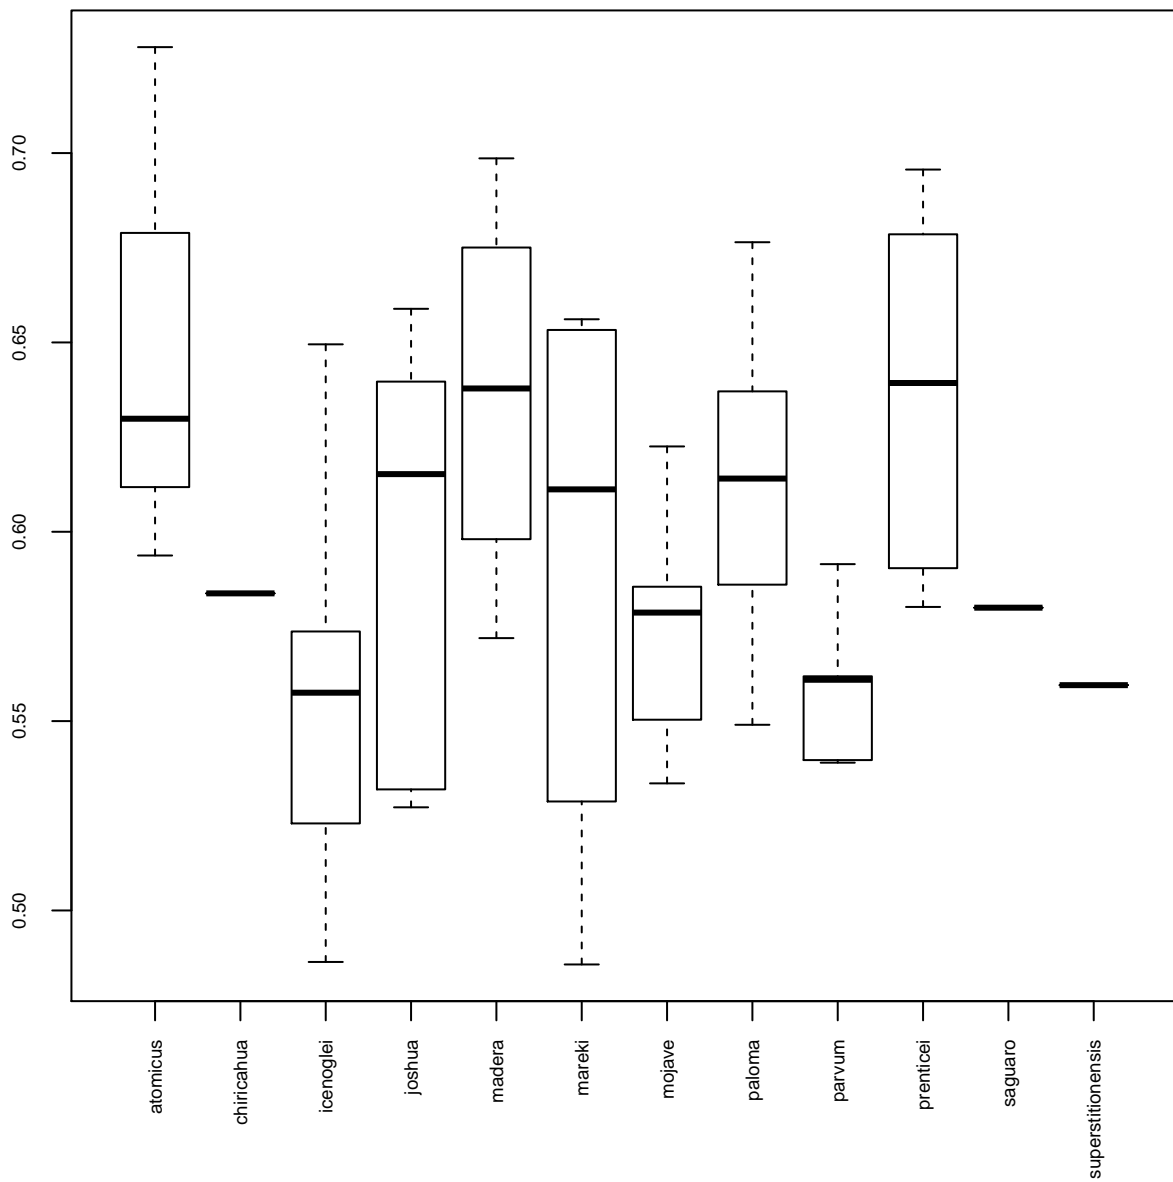

Supplement: Supplementary file 800
