# Supplementary material (part 9 of 15)
Source: publisher site journal article supplement (http://zookeys.pensoft.net/article/6264/download/suppl/32/)

## Carapace Length/Tarsus 1 ratio – males

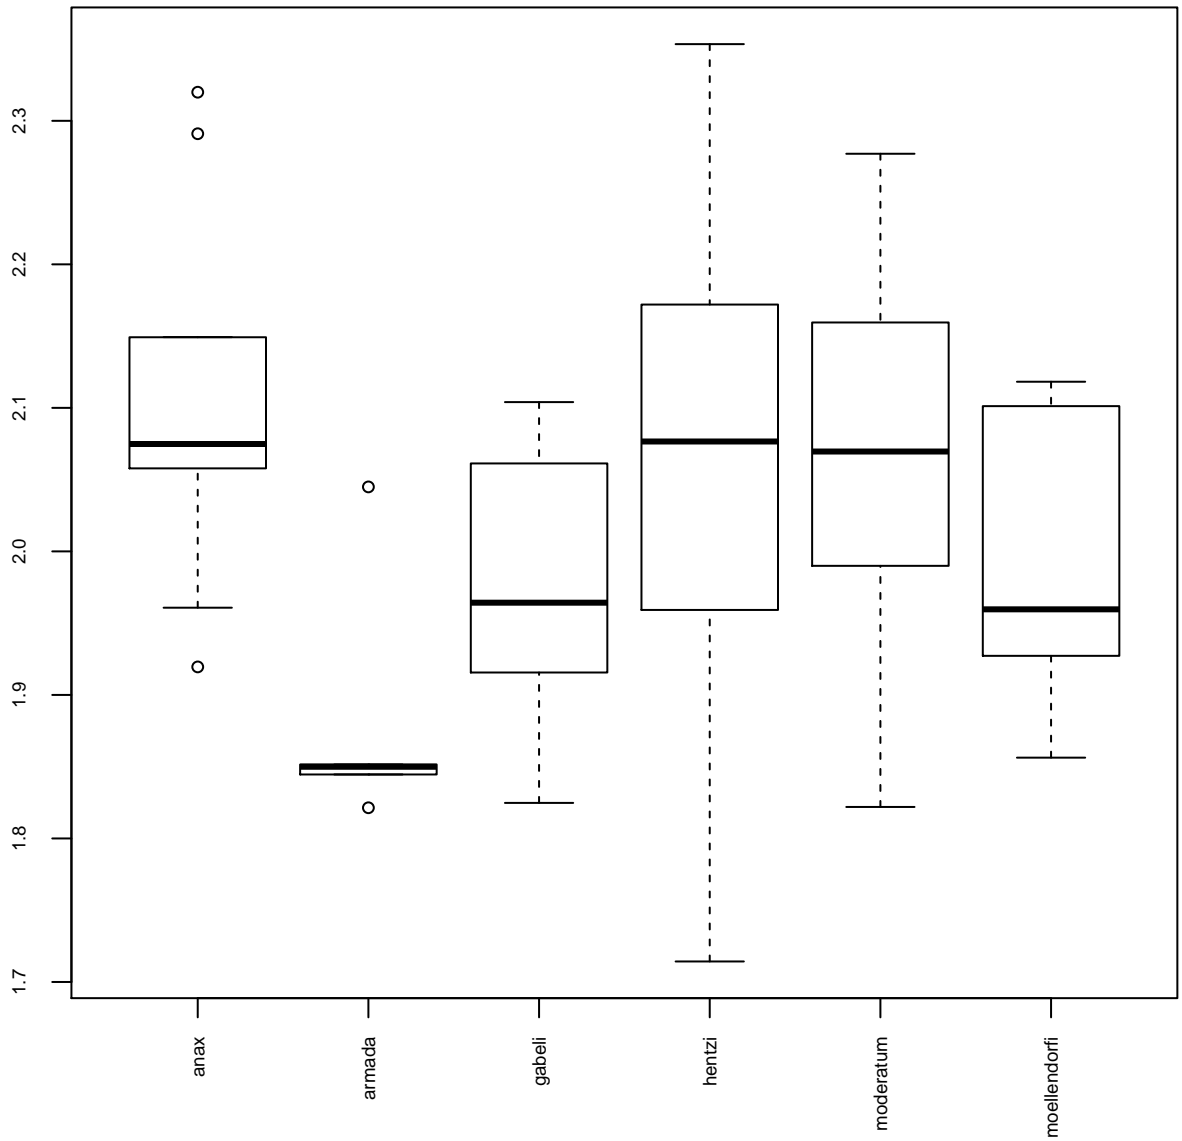

Supplement: Supplementary file 801

## Leg 4 Length – females

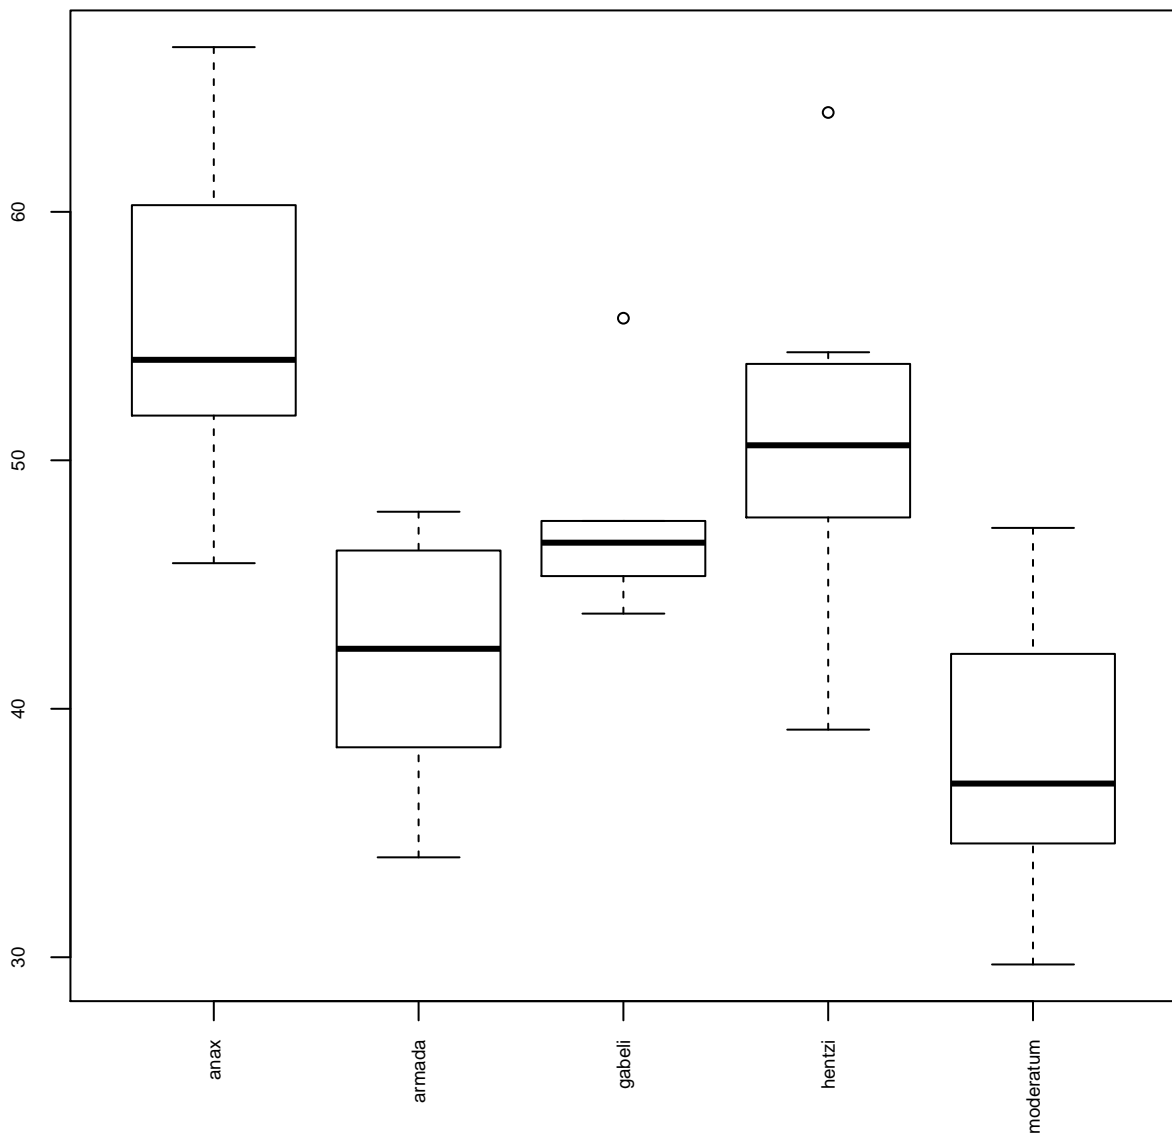

Supplement: Supplementary file 802

## Tibia 3/Tibia 4 ratio – females

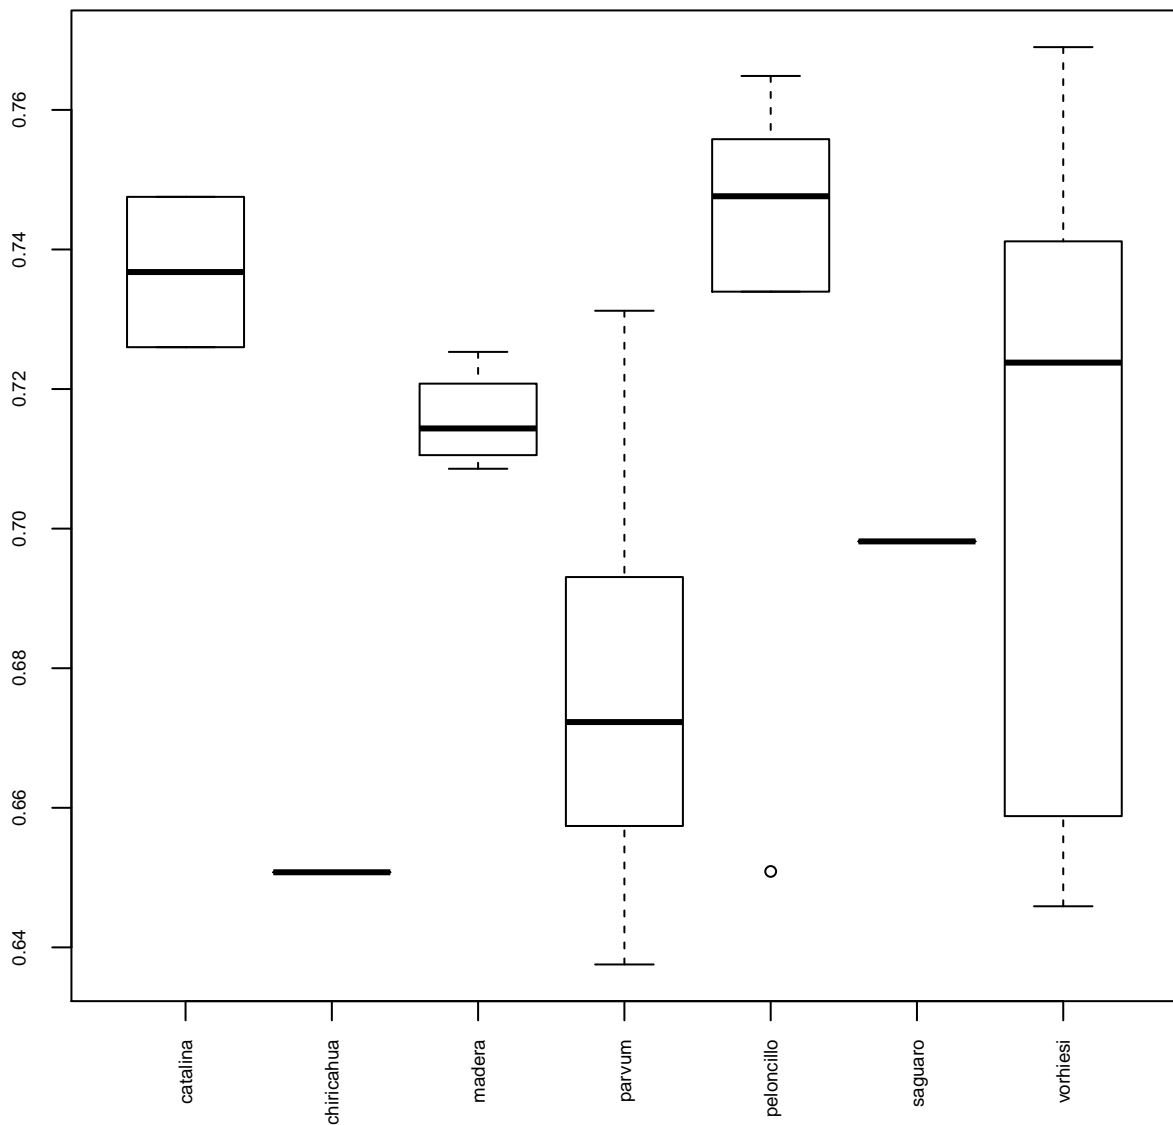

Supplement: Supplementary file 803

## Patella 3/Tibia 4 Length ratio – males

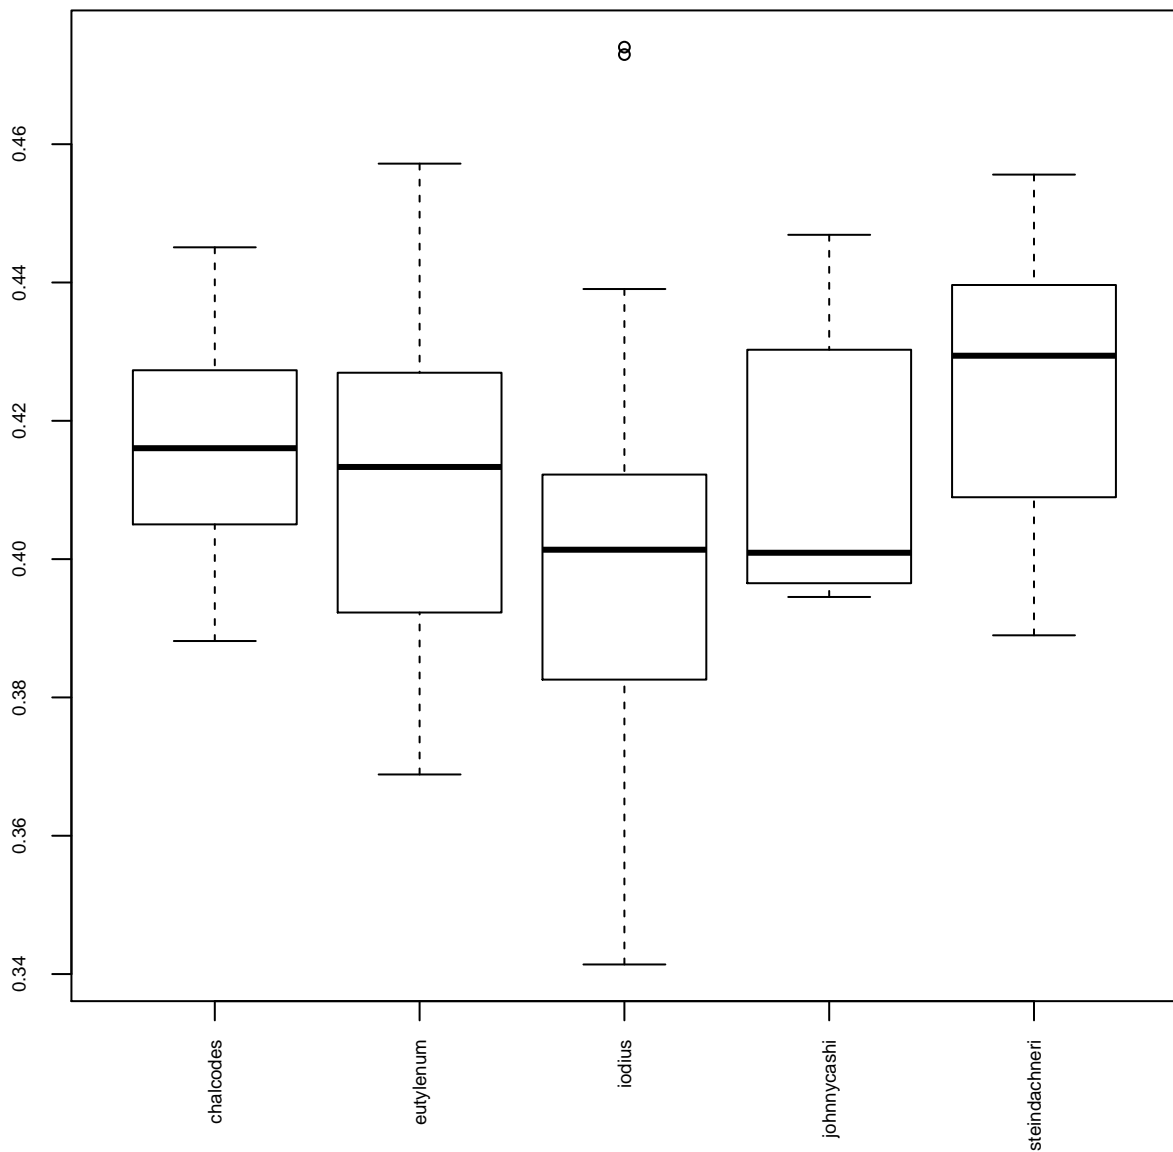

Supplement: Supplementary file 804

# Femur 4 Length/Width ratio – females

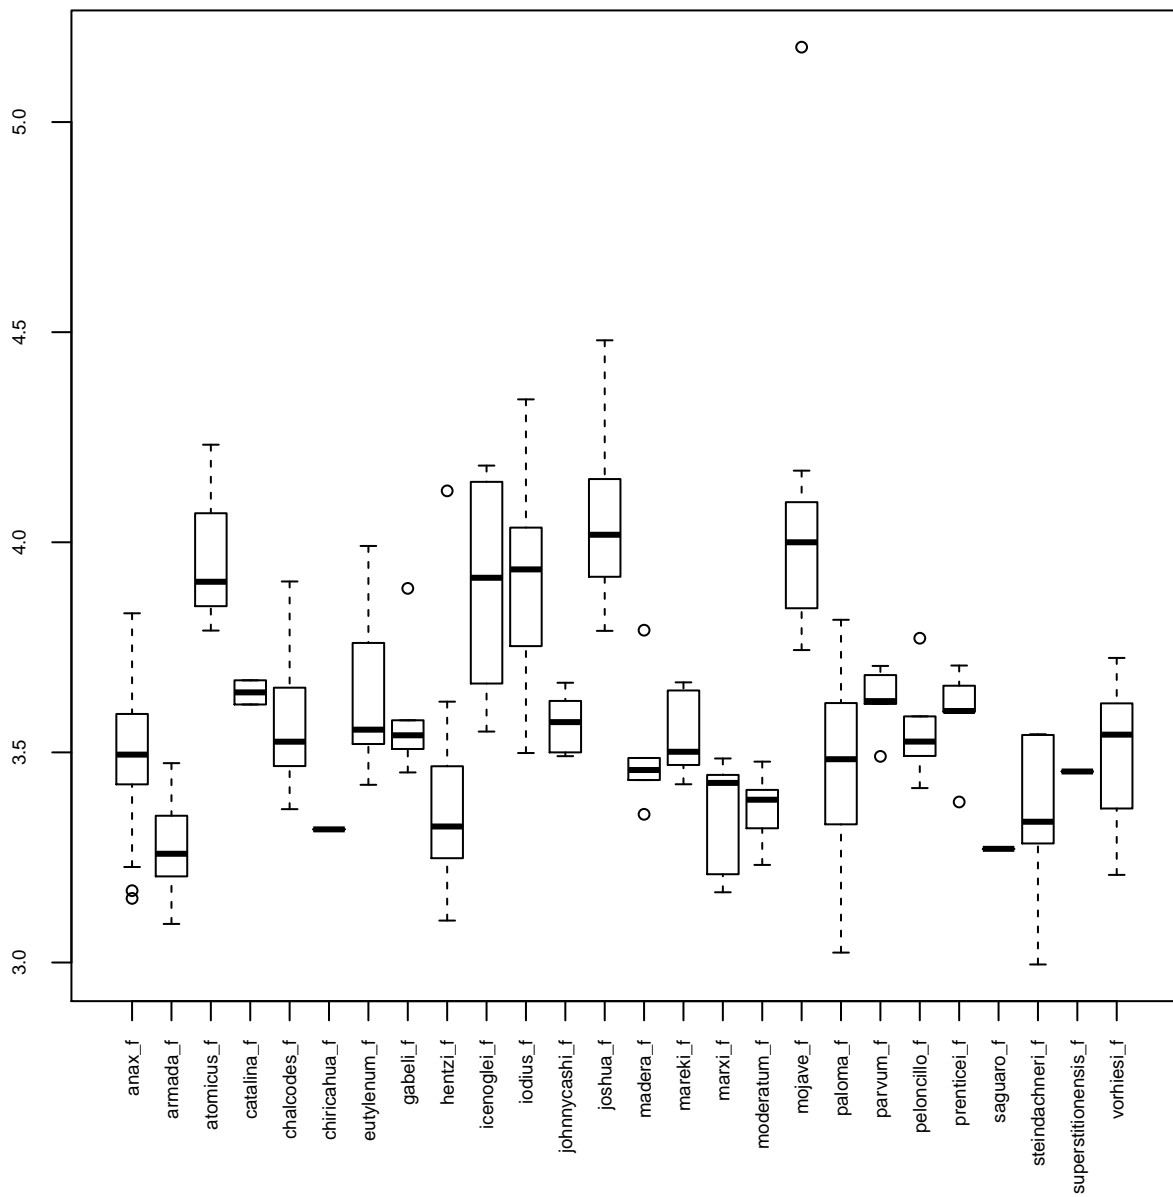

Supplement: Supplementary file 805

## Metatarsus 1/Metatarsus 3 ratio – females

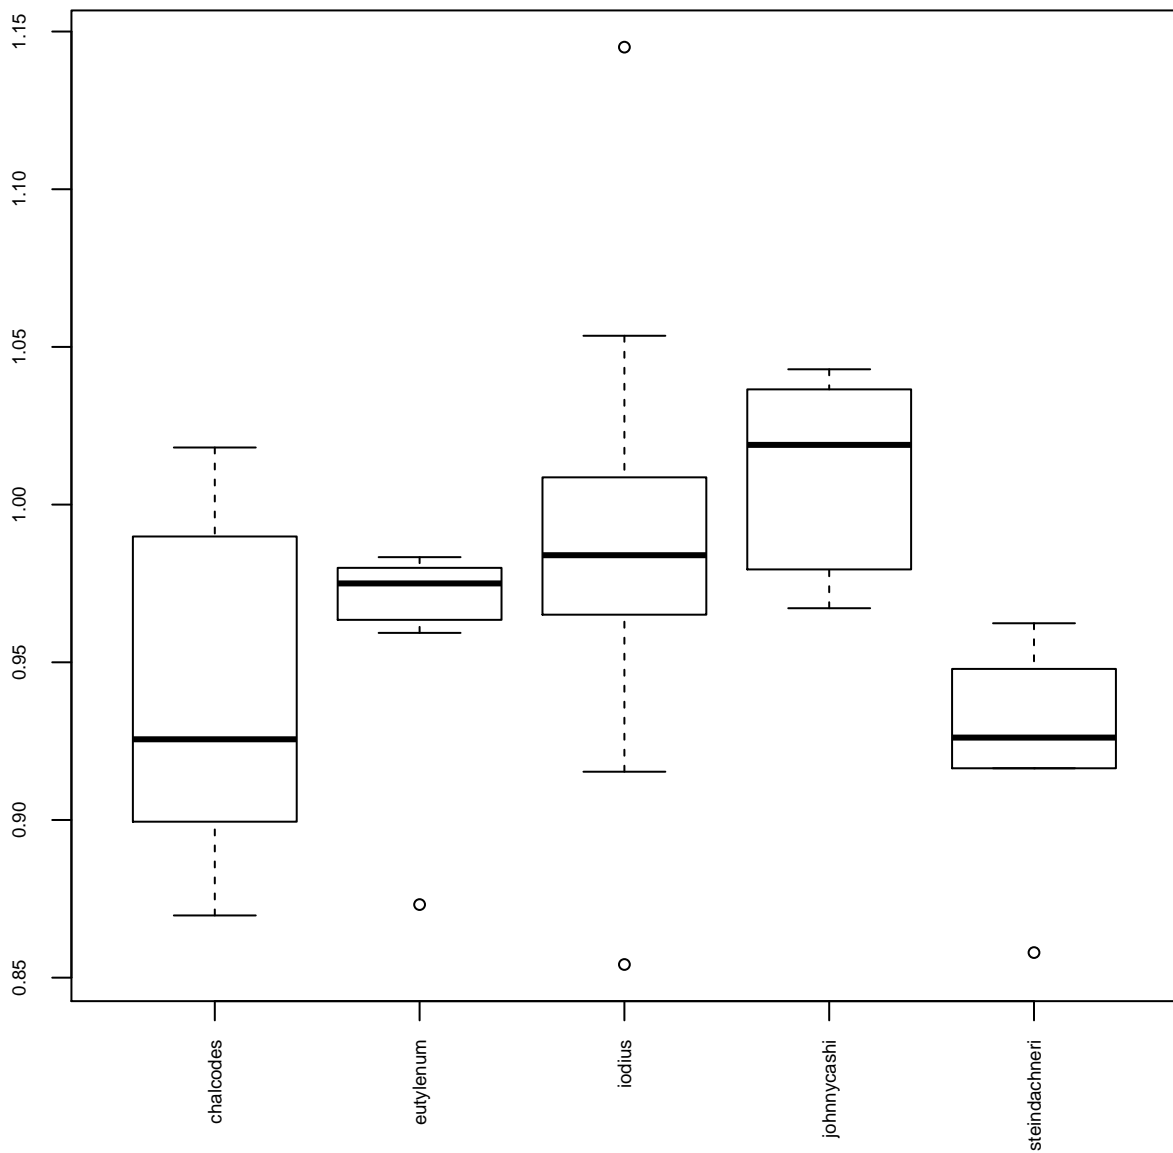

Supplement: Supplementary file 806

## Patella 1/Femur 3 Length ratio – females

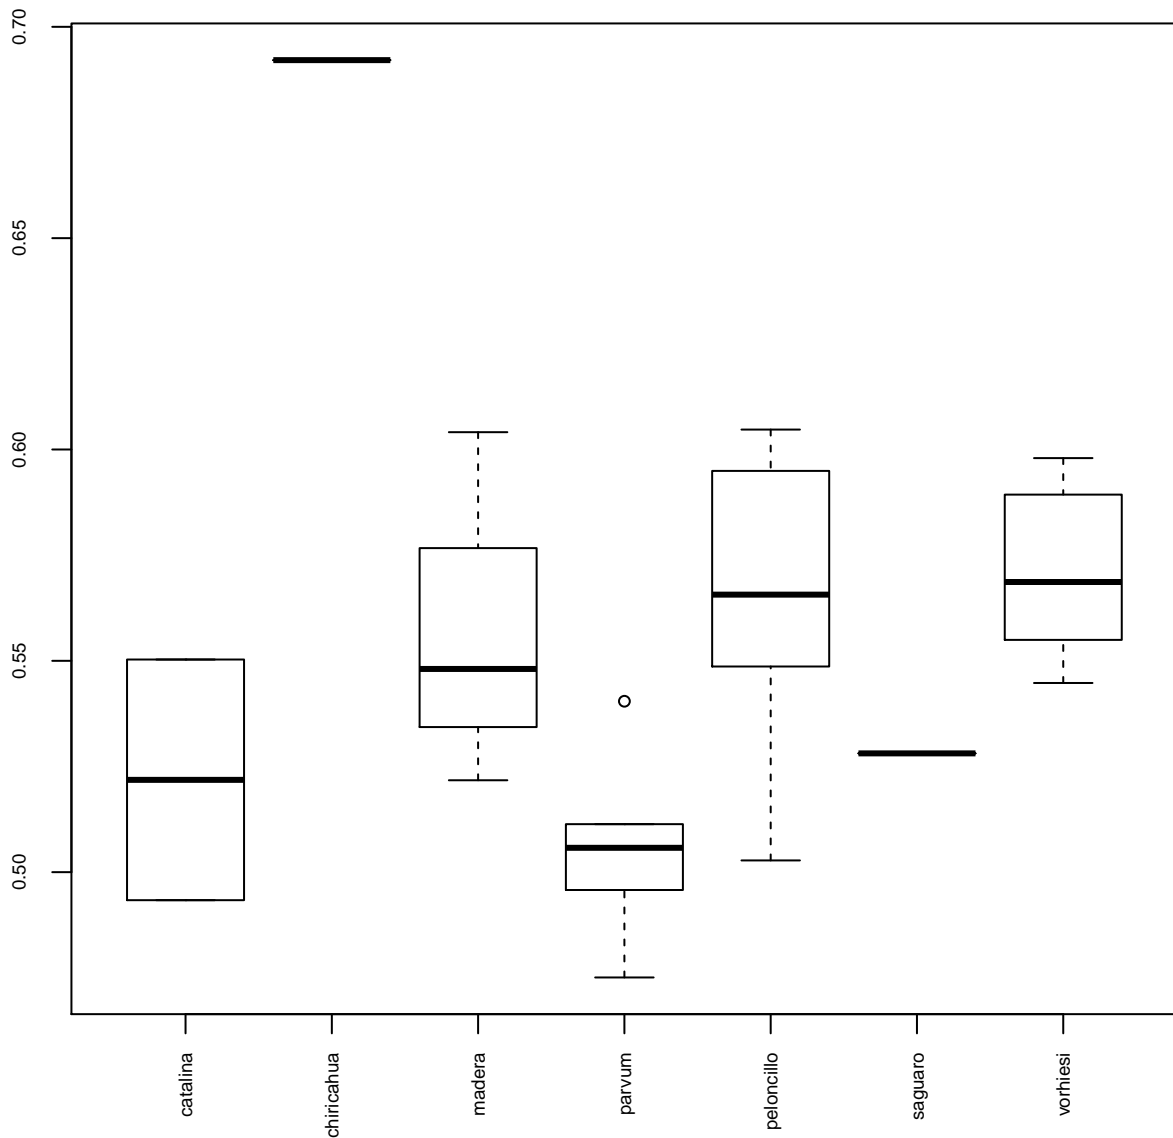

Supplement: Supplementary file 807

## Tibia 1/Femur 4 Length ratio – males

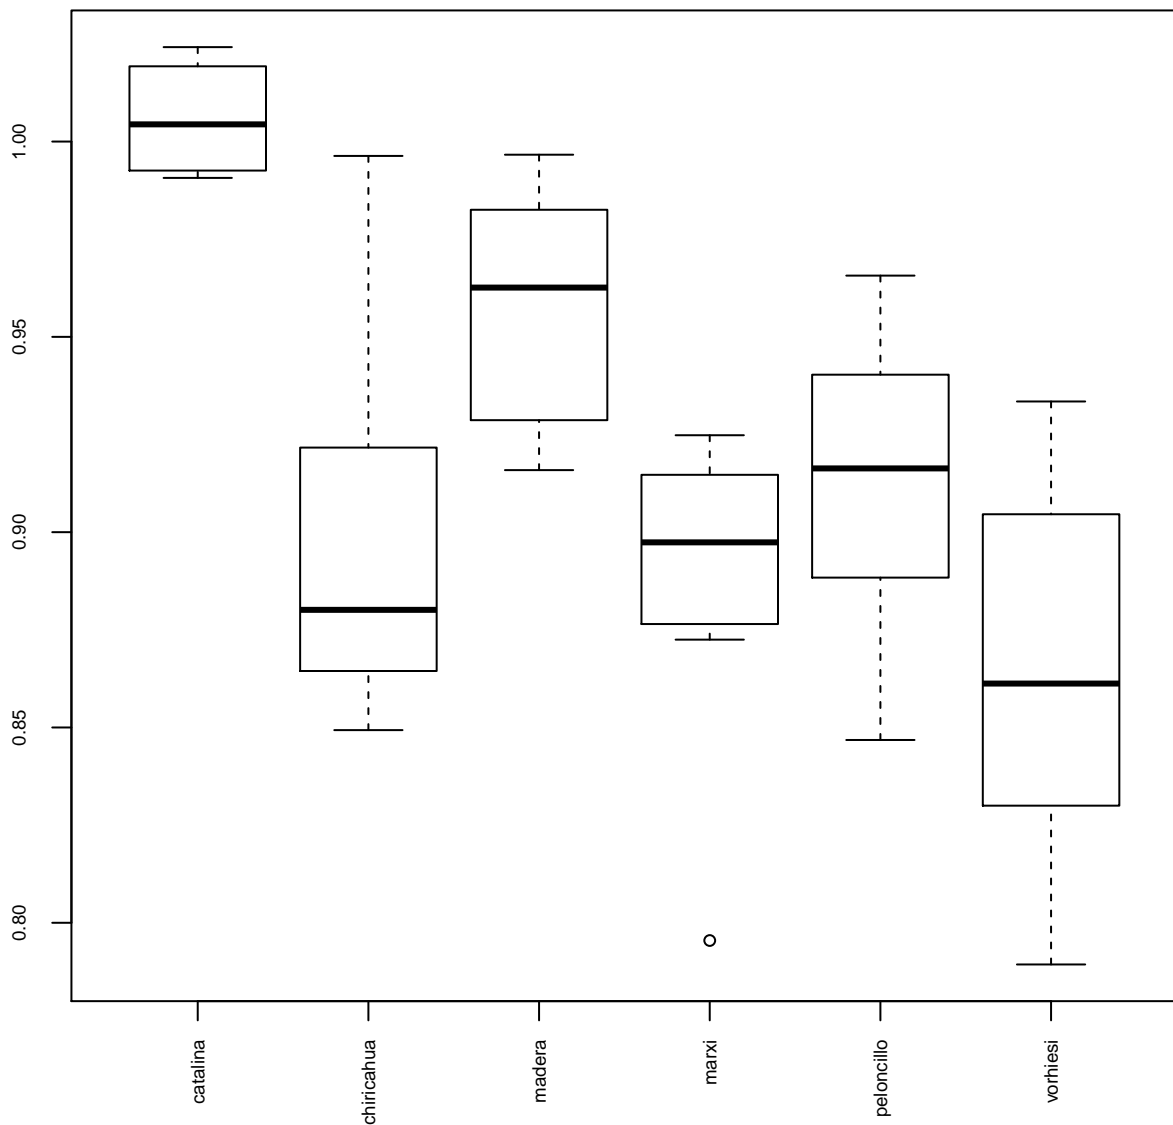

Supplement: Supplementary file 808

## Tibia 4/Metatarsus 4 ratio – males

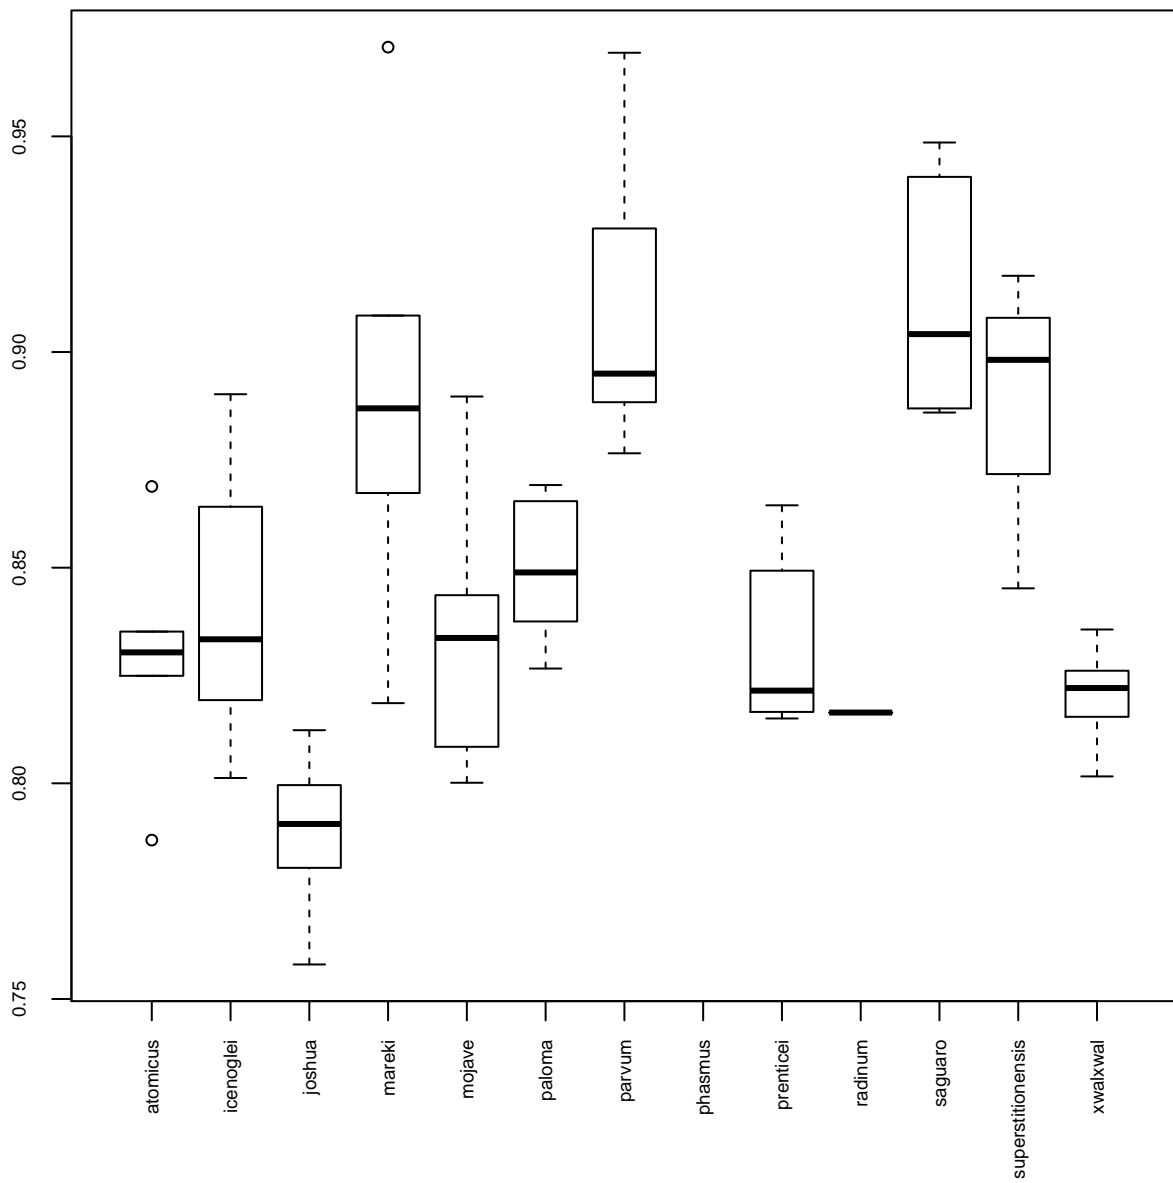

Supplement: Supplementary file 809

## Tarsus 1/Tibia 4 Length ratio – males

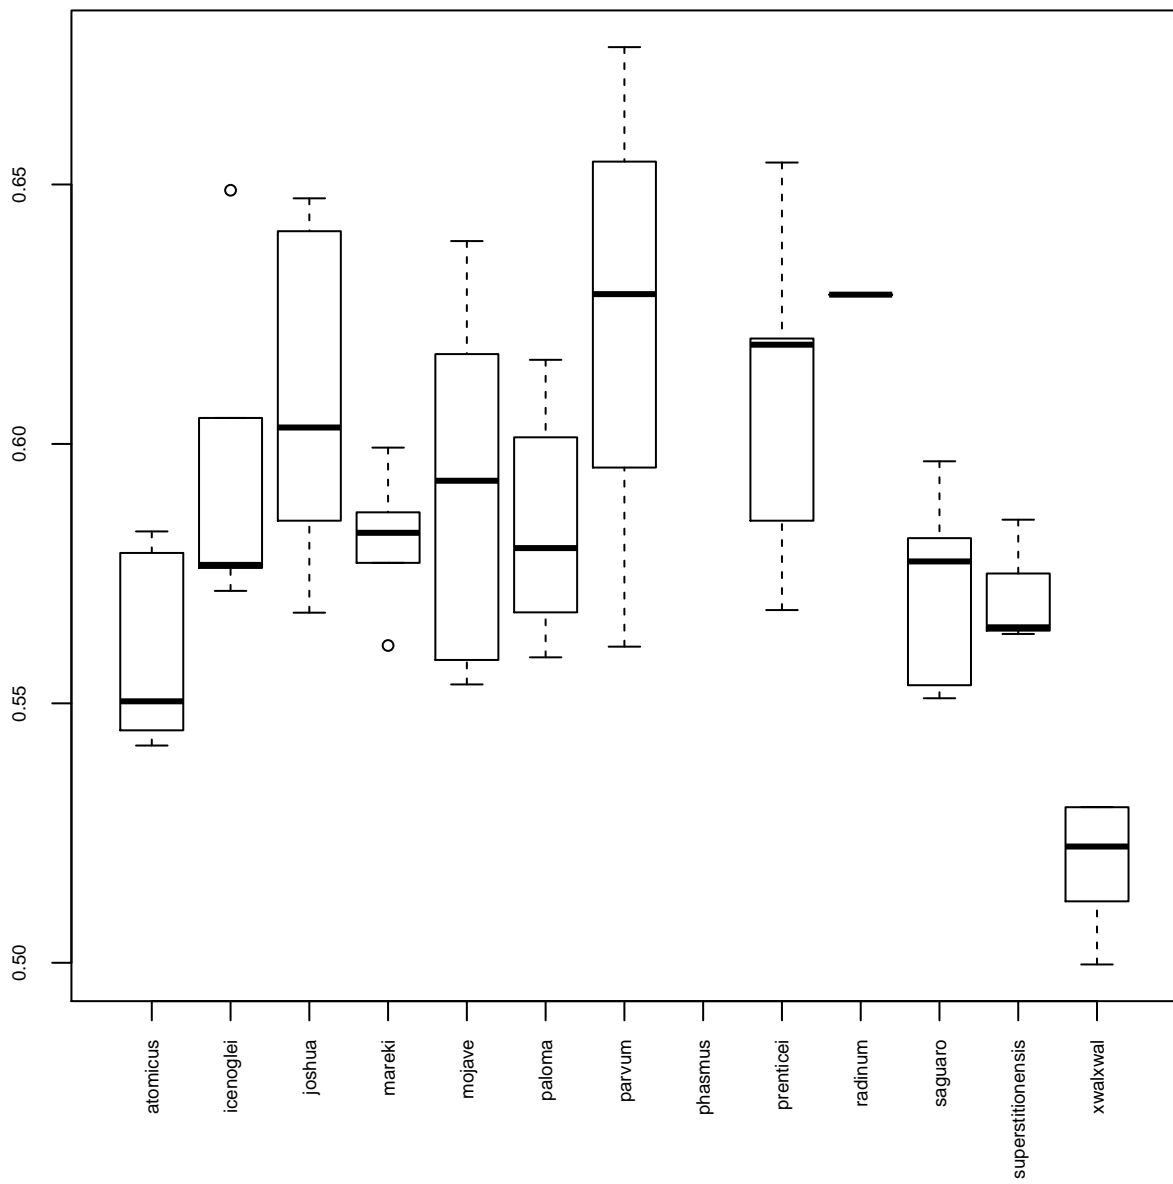

Supplement: Supplementary file 810

# Femur 1/Patella 3 ratio – males

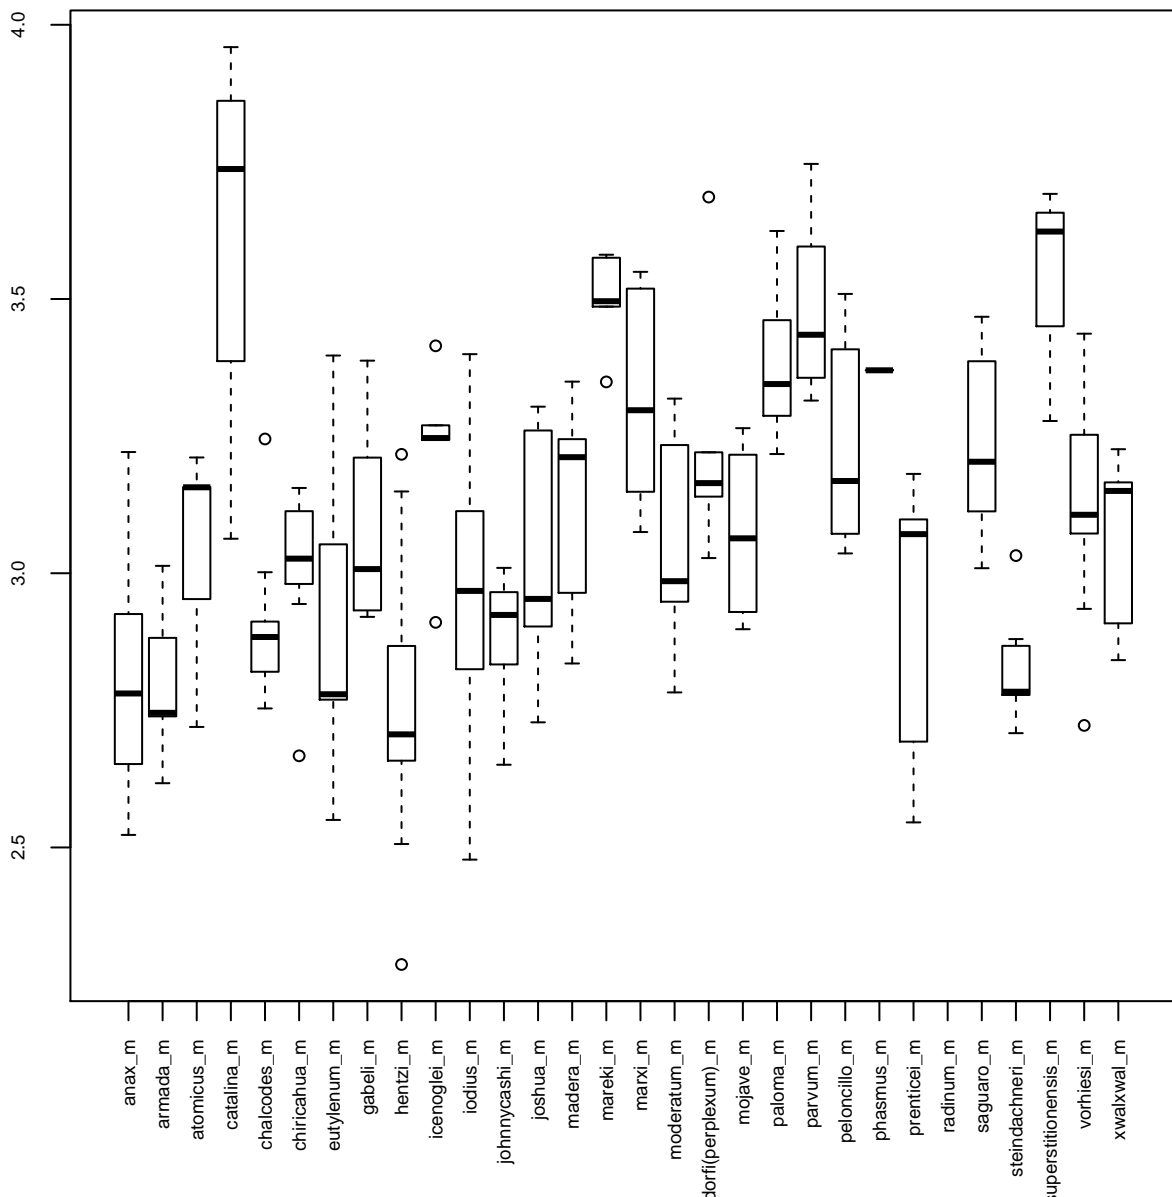

Supplement: Supplementary file 811

## Patella 1/Tibia 4 Length ratio – males

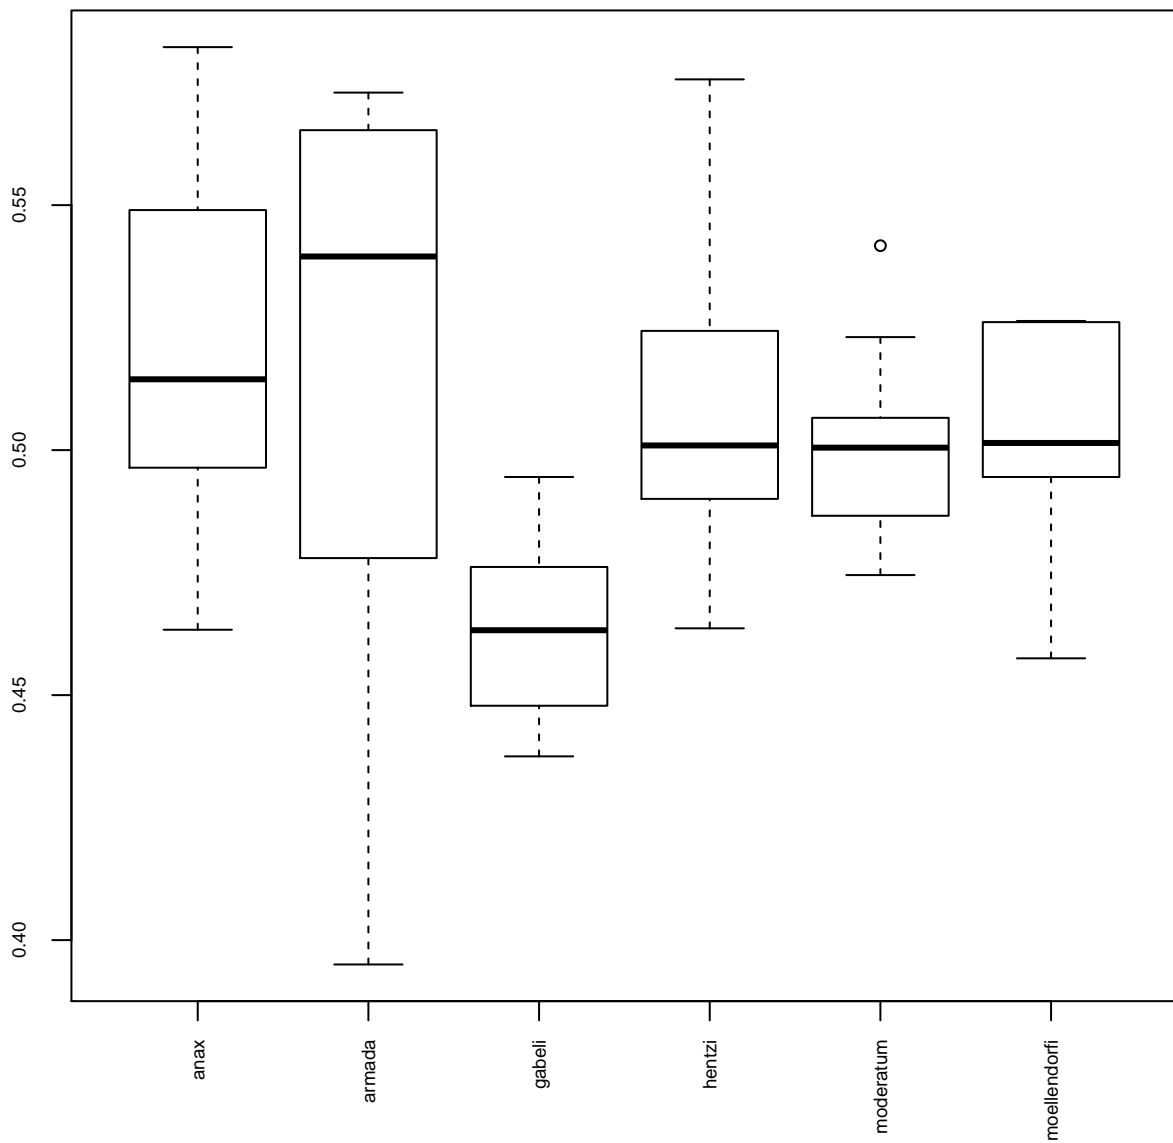

Supplement: Supplementary file 812

## Patella 1/Femur 3 Length ratio – males

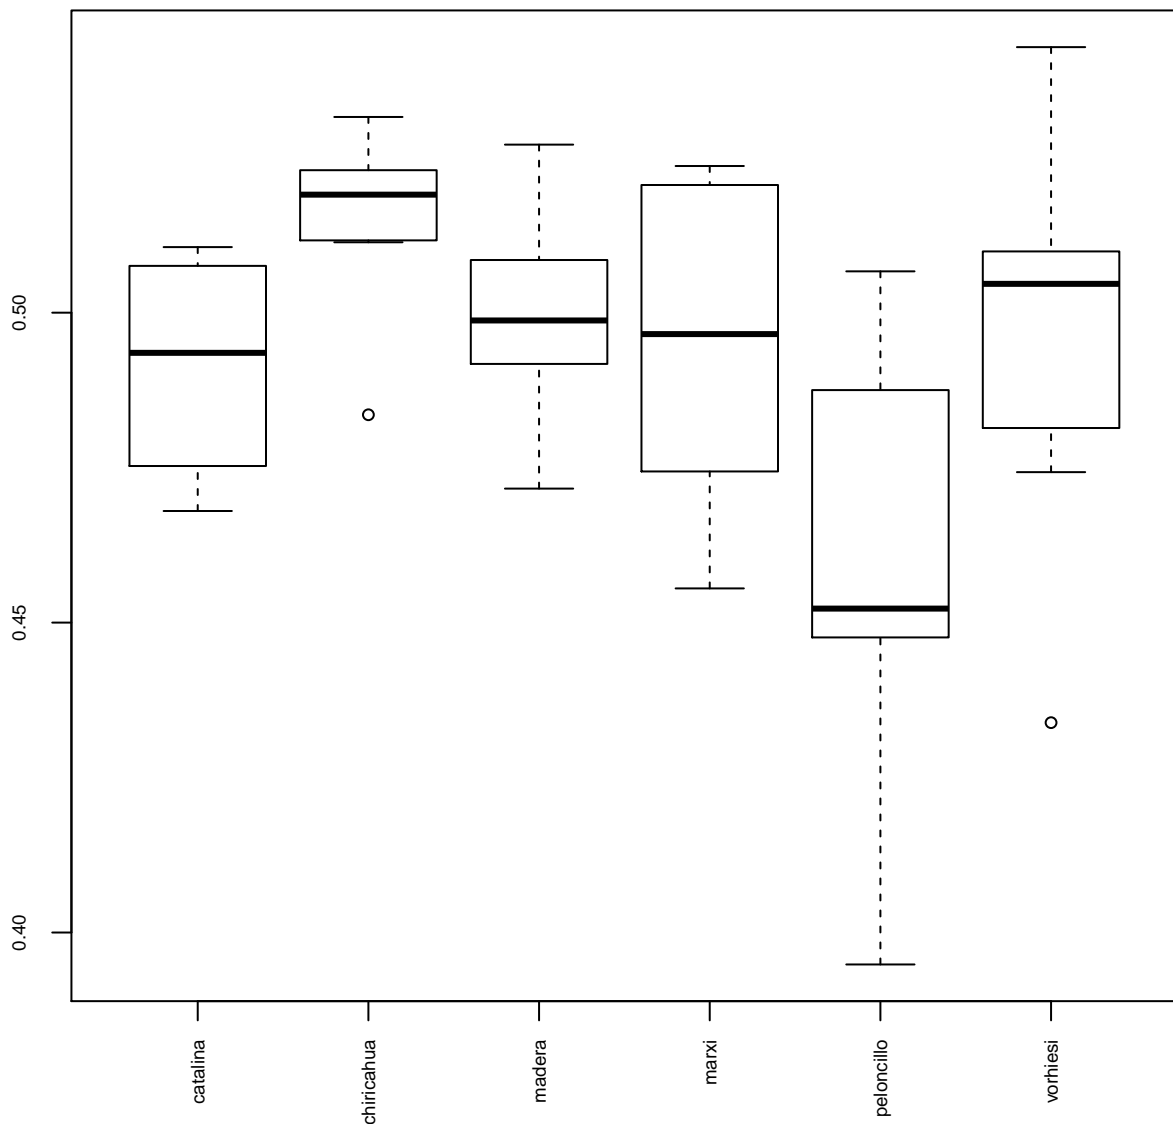

Supplement: Supplementary file 813

## Tibia 3/Metatarsus 3 ratio – females

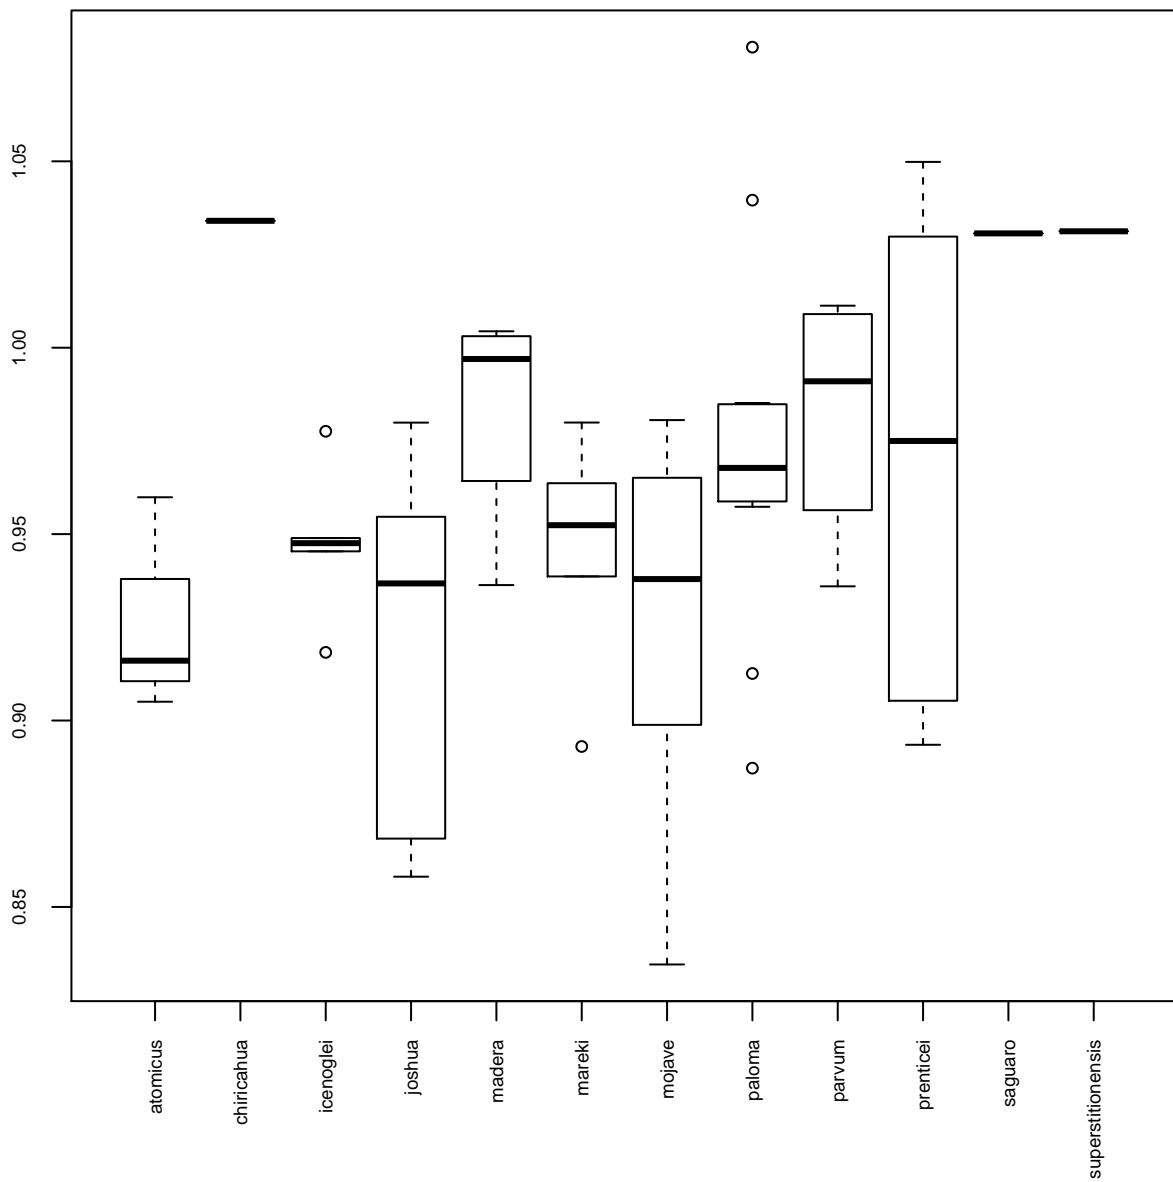

Supplement: Supplementary file 814

## Patella 1/Femur 4 Length ratio – males

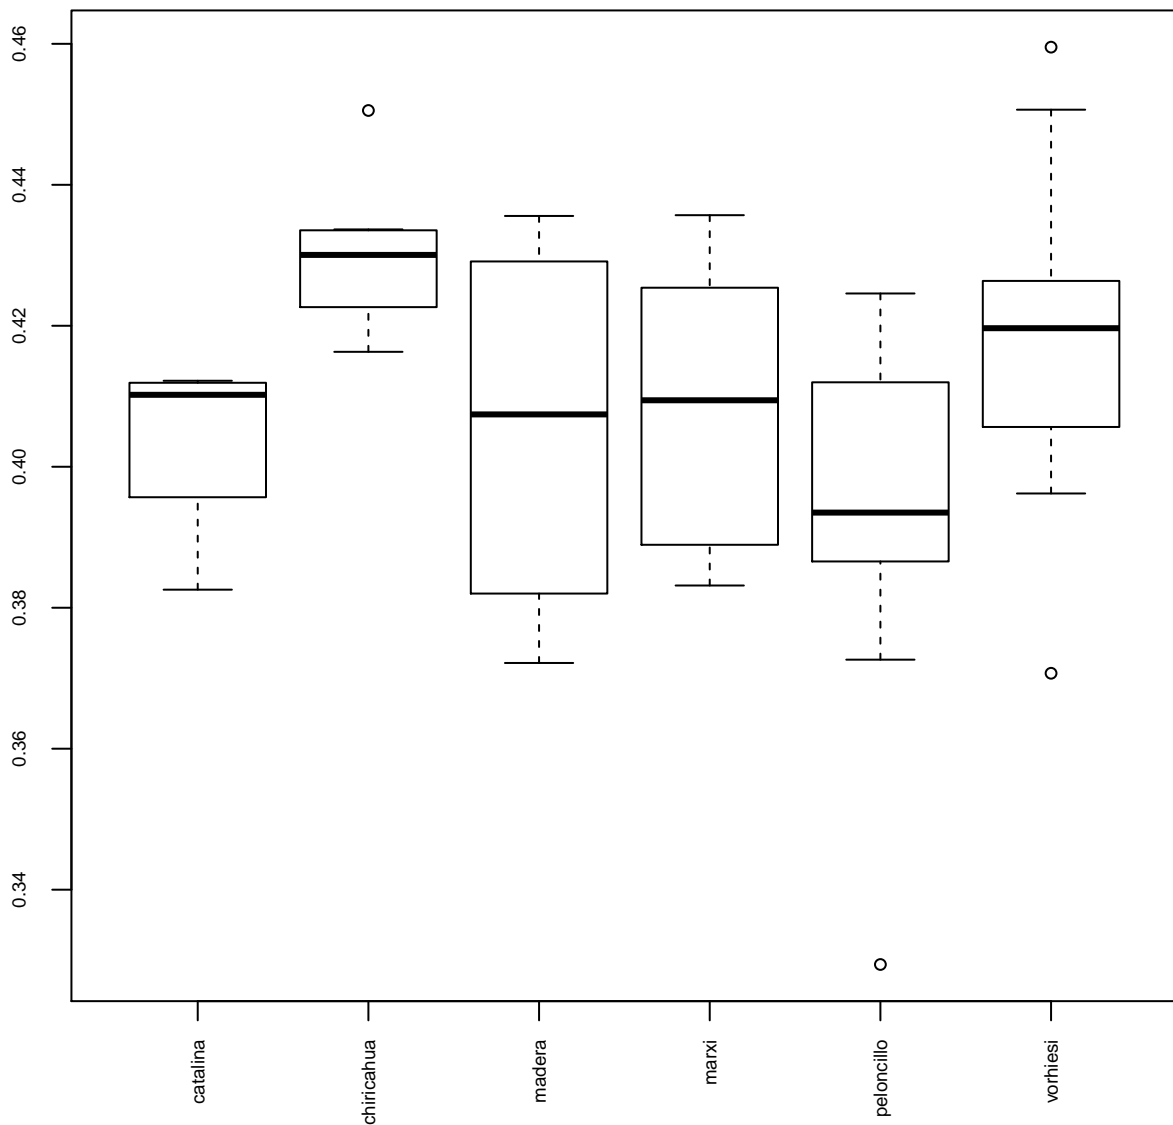

Supplement: Supplementary file 815

# Metatarsus 3/Metatarsus 4 ratio – females

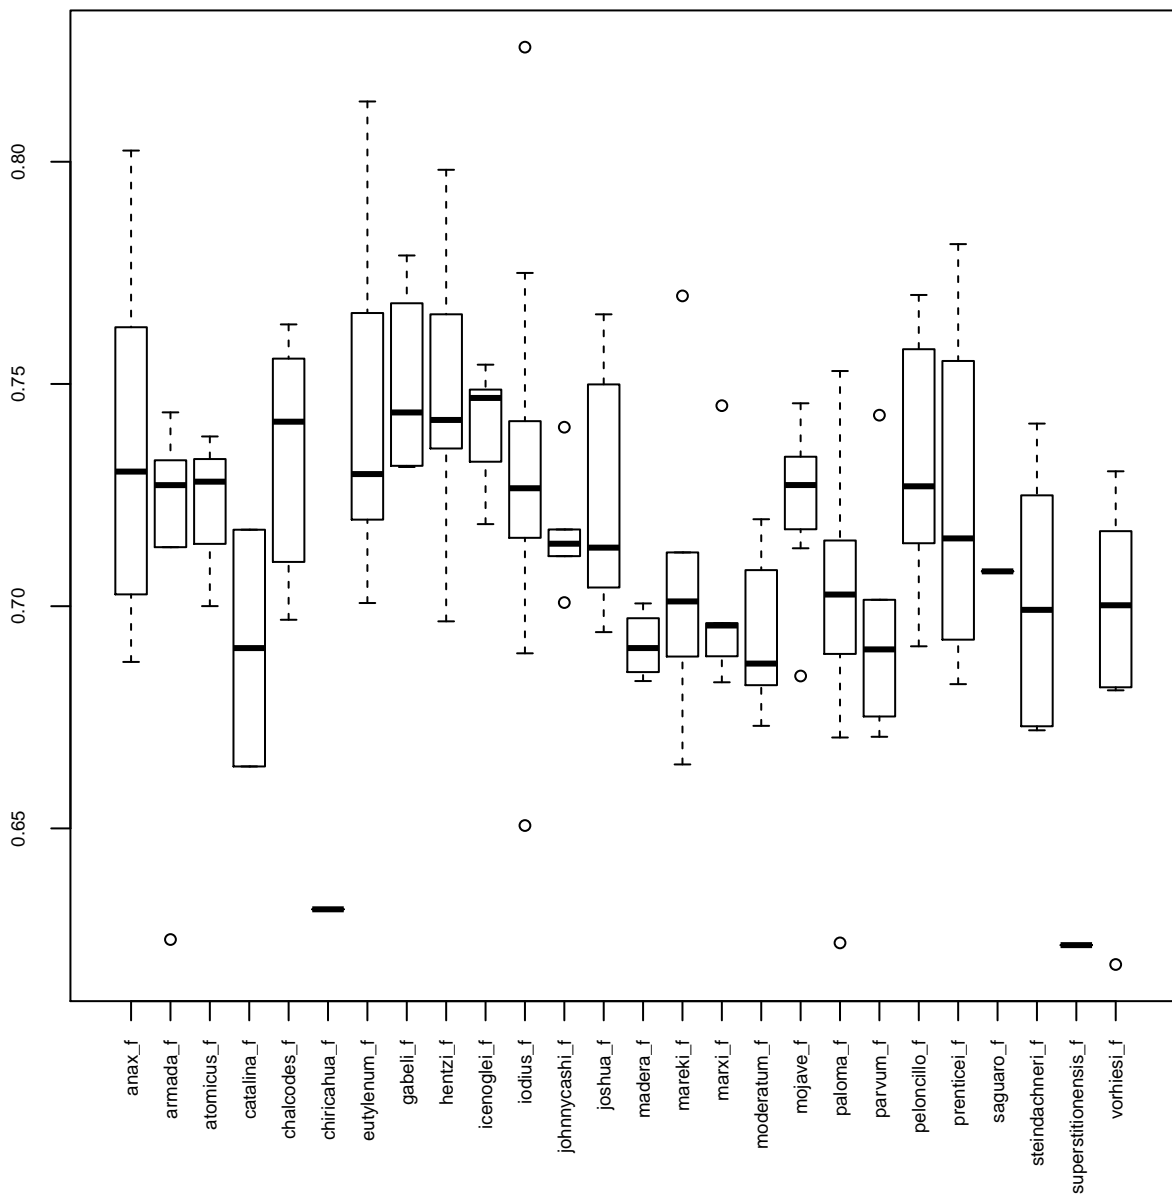

Supplement: Supplementary file 816

## Patella 3/Patella 4 ratio – females

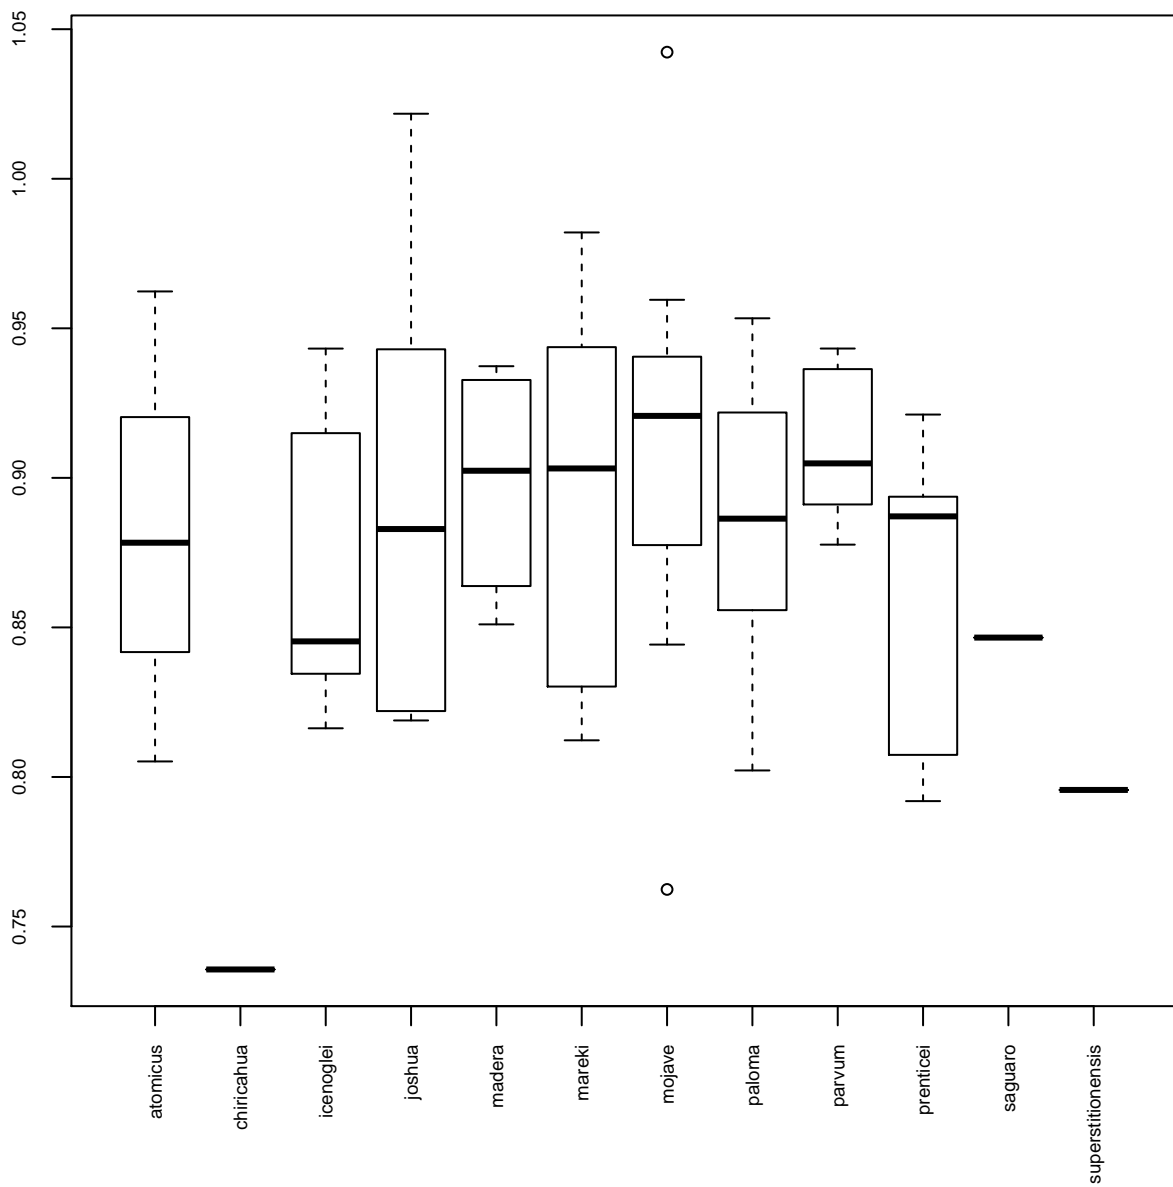

Supplement: Supplementary file 817

## Tarsus 1/Femur 3 Length ratio – females

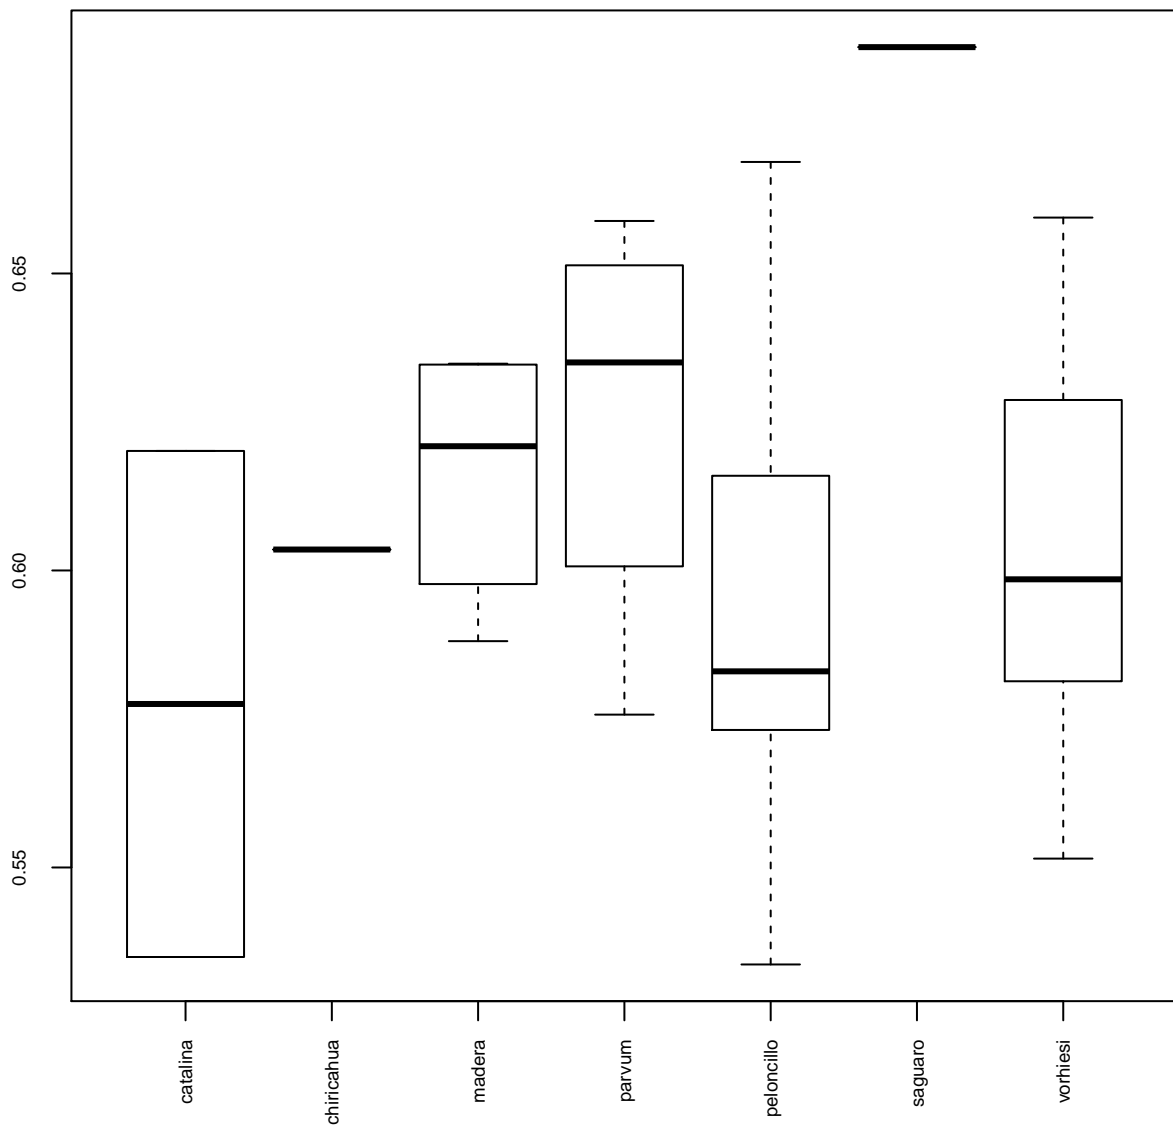

Supplement: Supplementary file 818

## Carapace Length/Patella 3 ratio – females

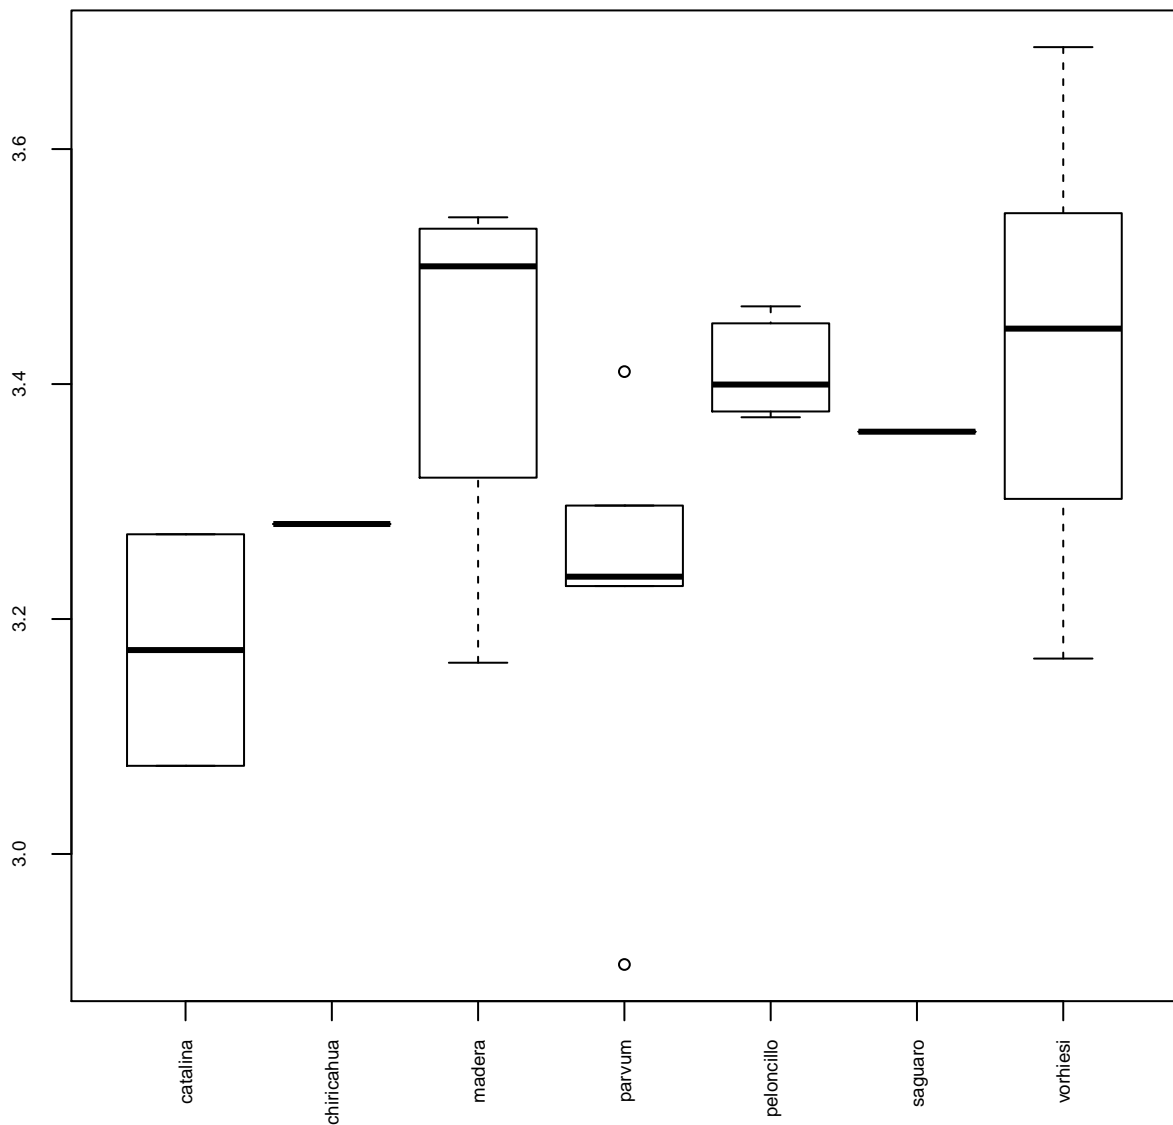

Supplement: Supplementary file 819

## Patella 1/Tibia 4 Length ratio – males

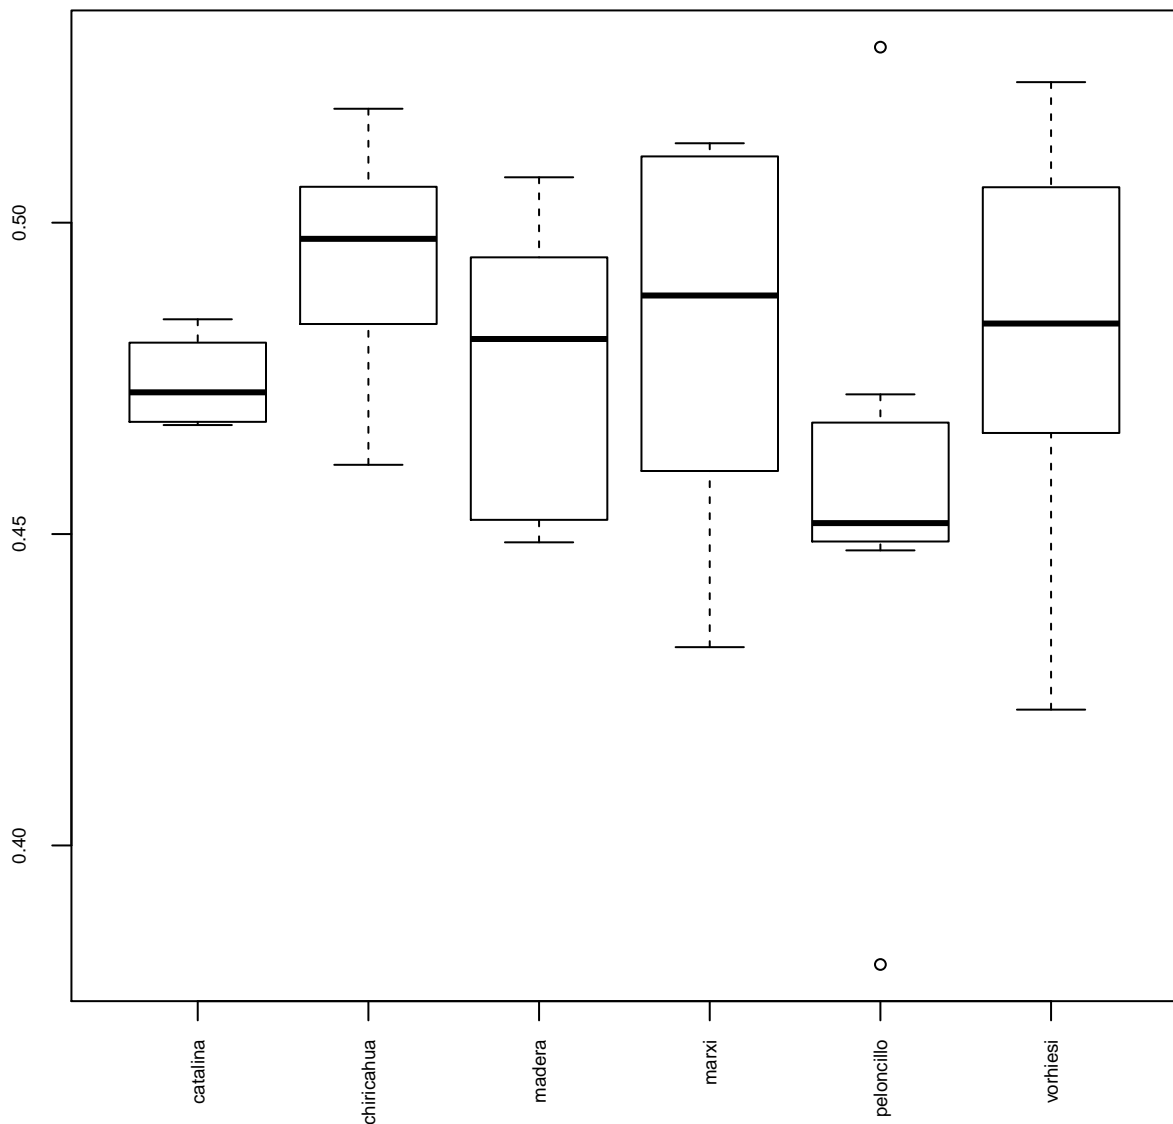

Supplement: Supplementary file 820

## Femur 4/Tarsus 4 ratio – males

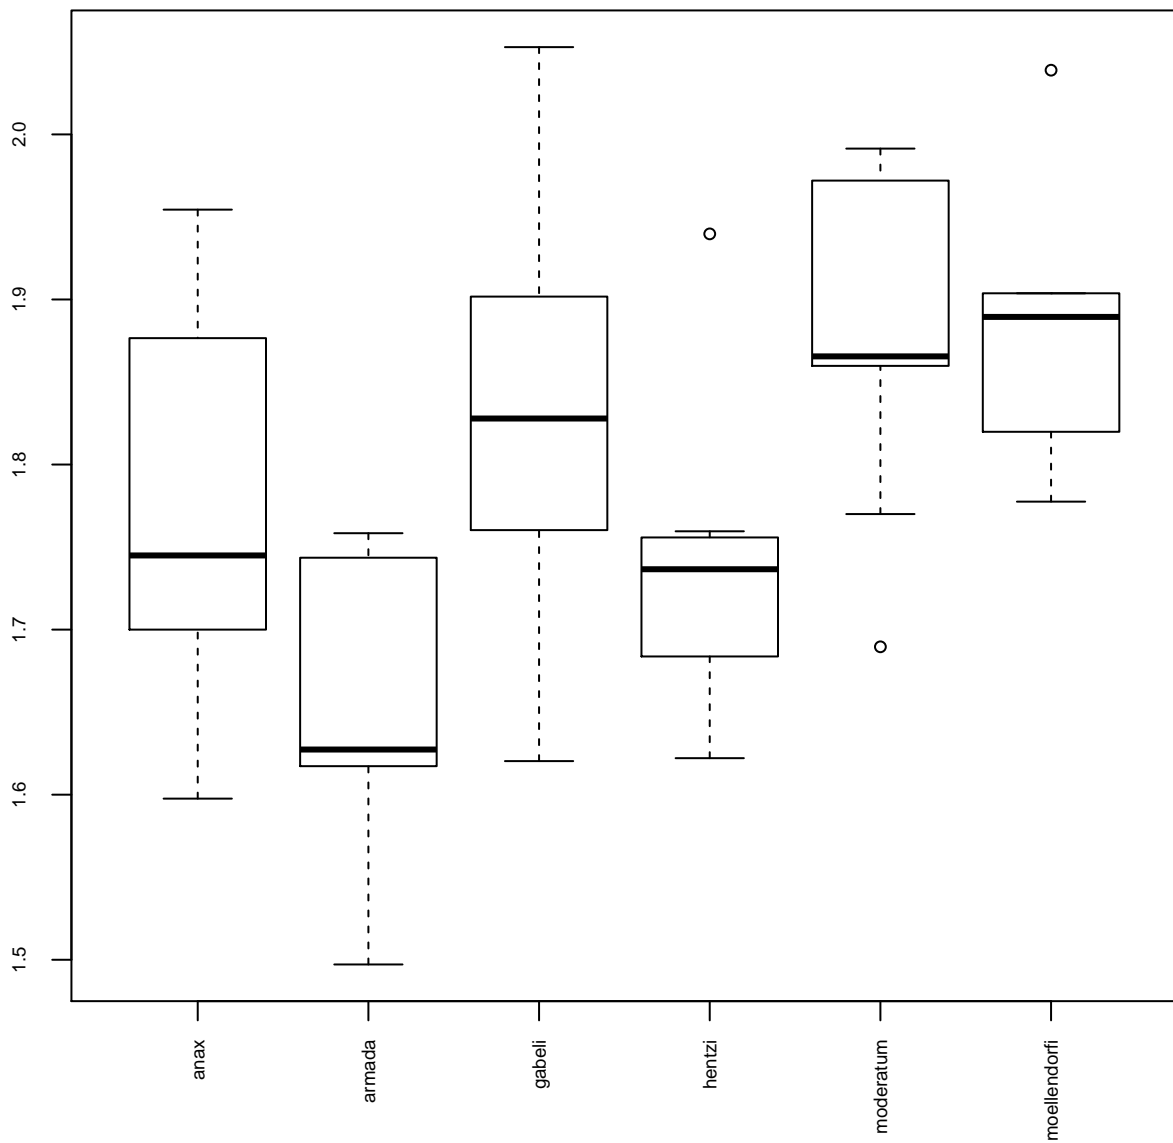

Supplement: Supplementary file 821

## Tarsus 1/Patella 3 Length ratio – females

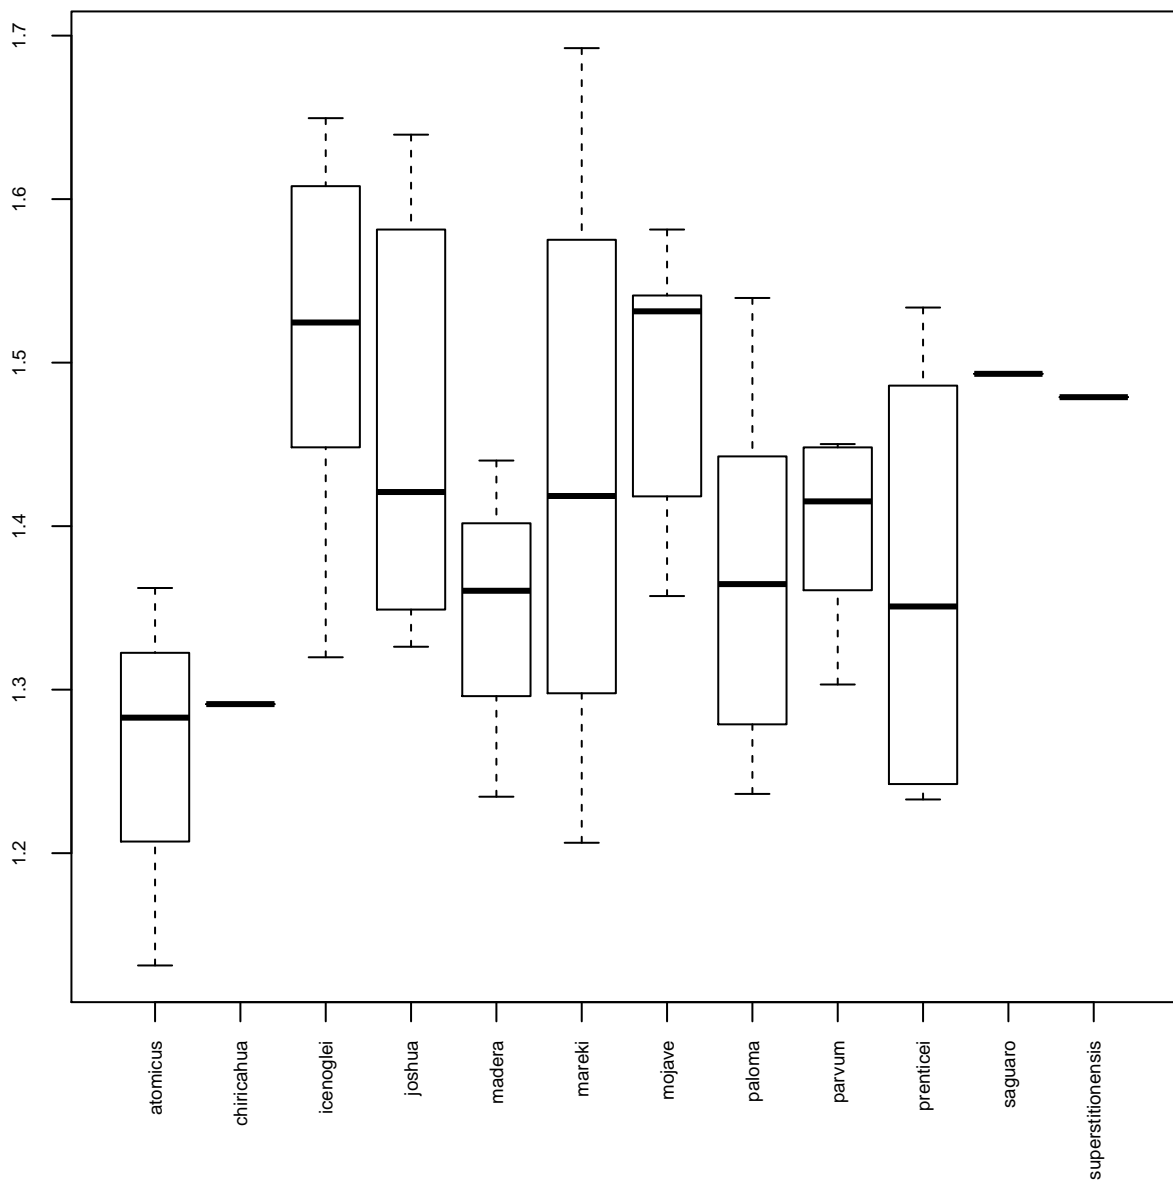

Supplement: Supplementary file 822

## Carapace Length/Width ratio – males

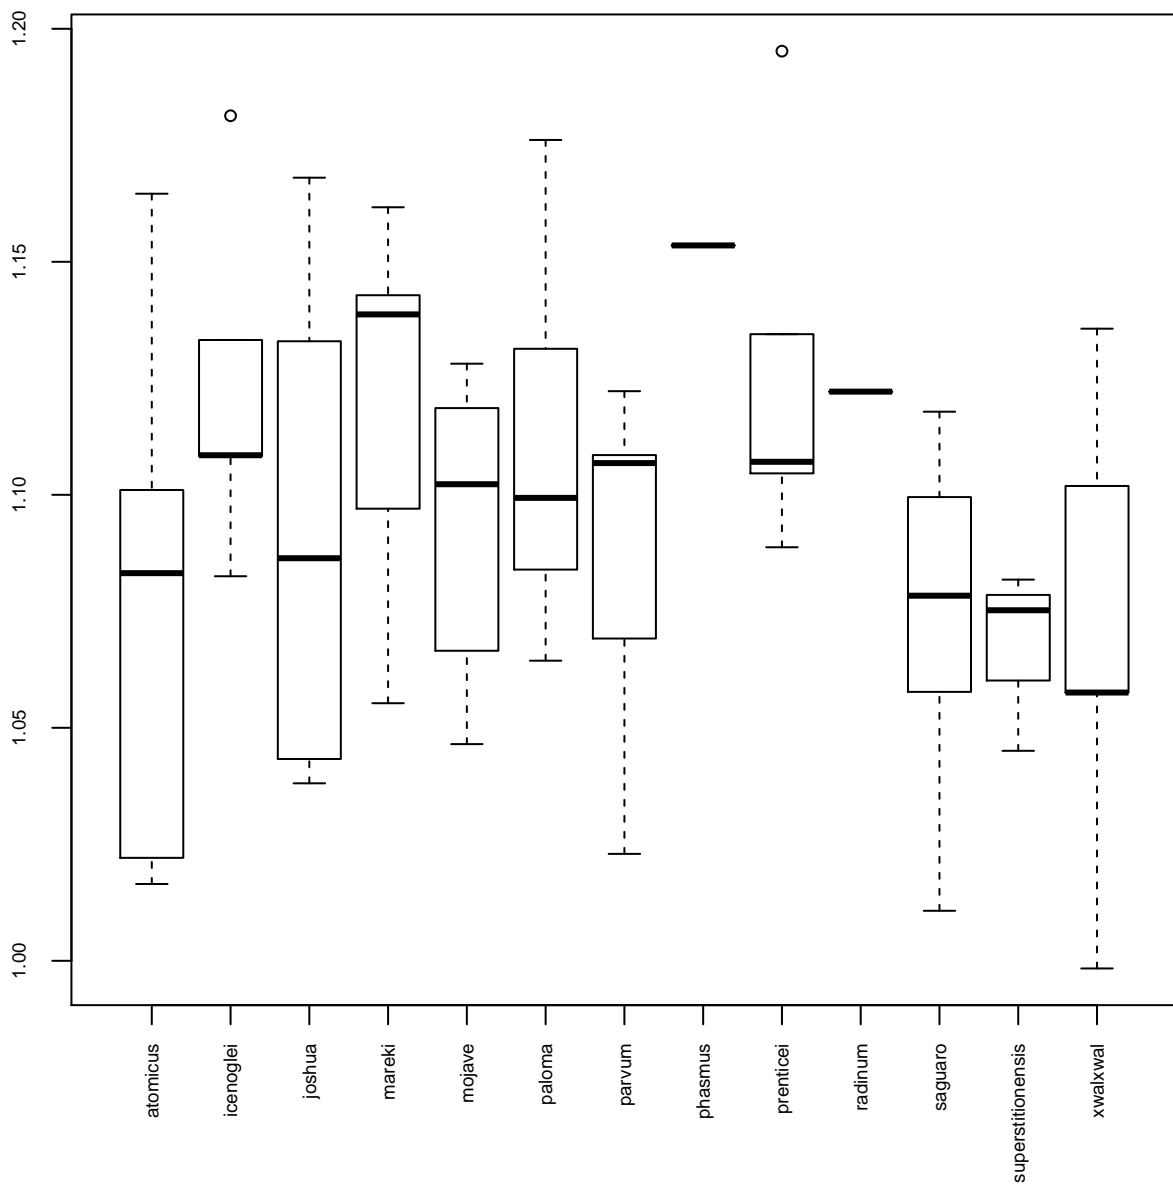

Supplement: Supplementary file 823

## Tibia 1/Femur 3 Length ratio – females

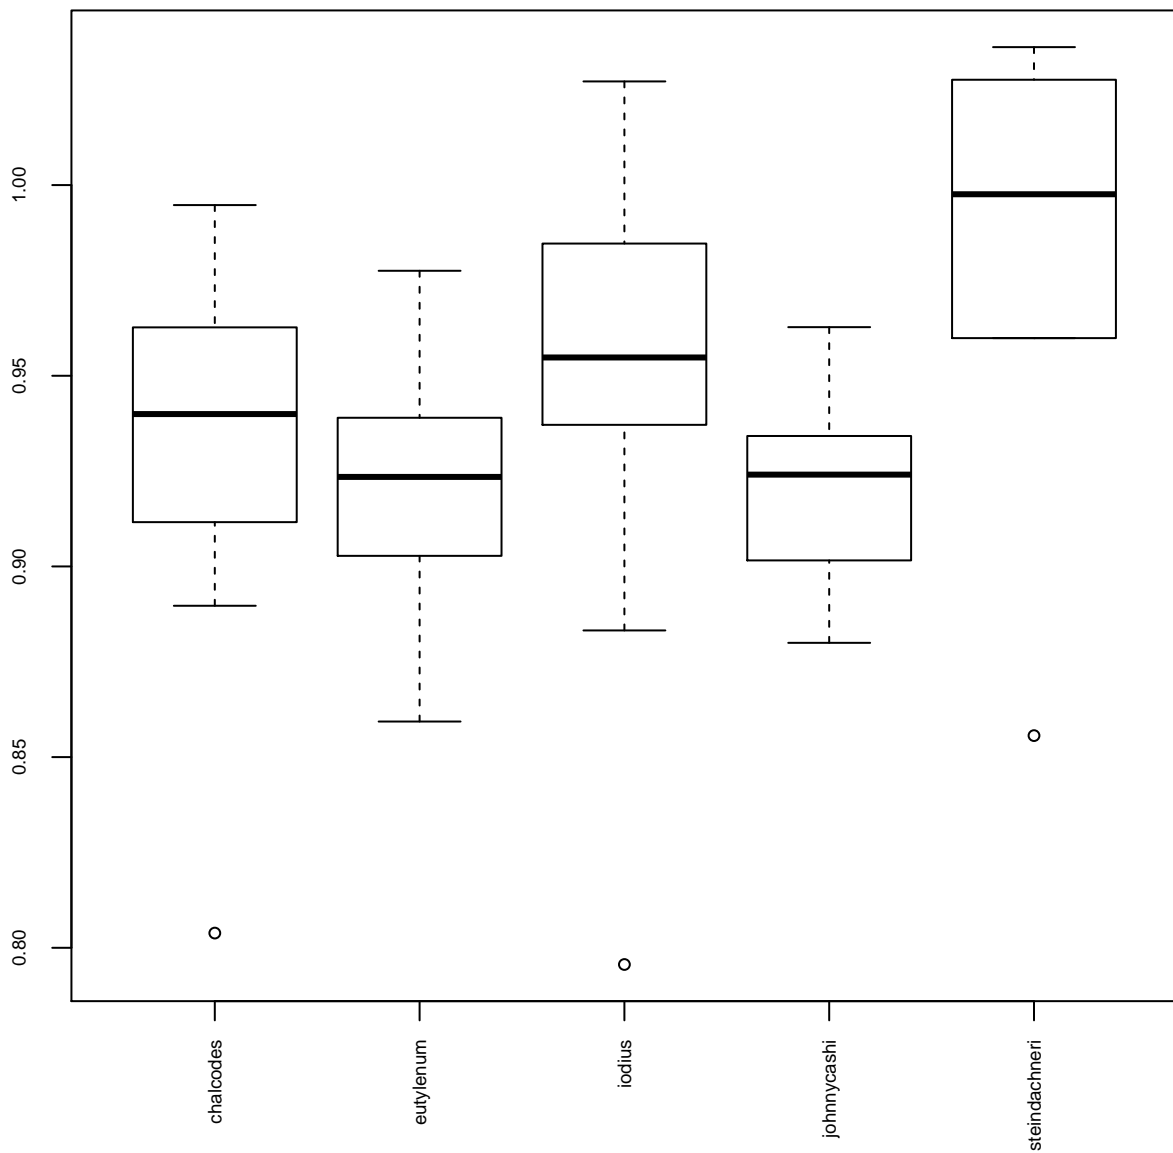

Supplement: Supplementary file 824

# Femur 3/Metatarsus 3 ratio – males

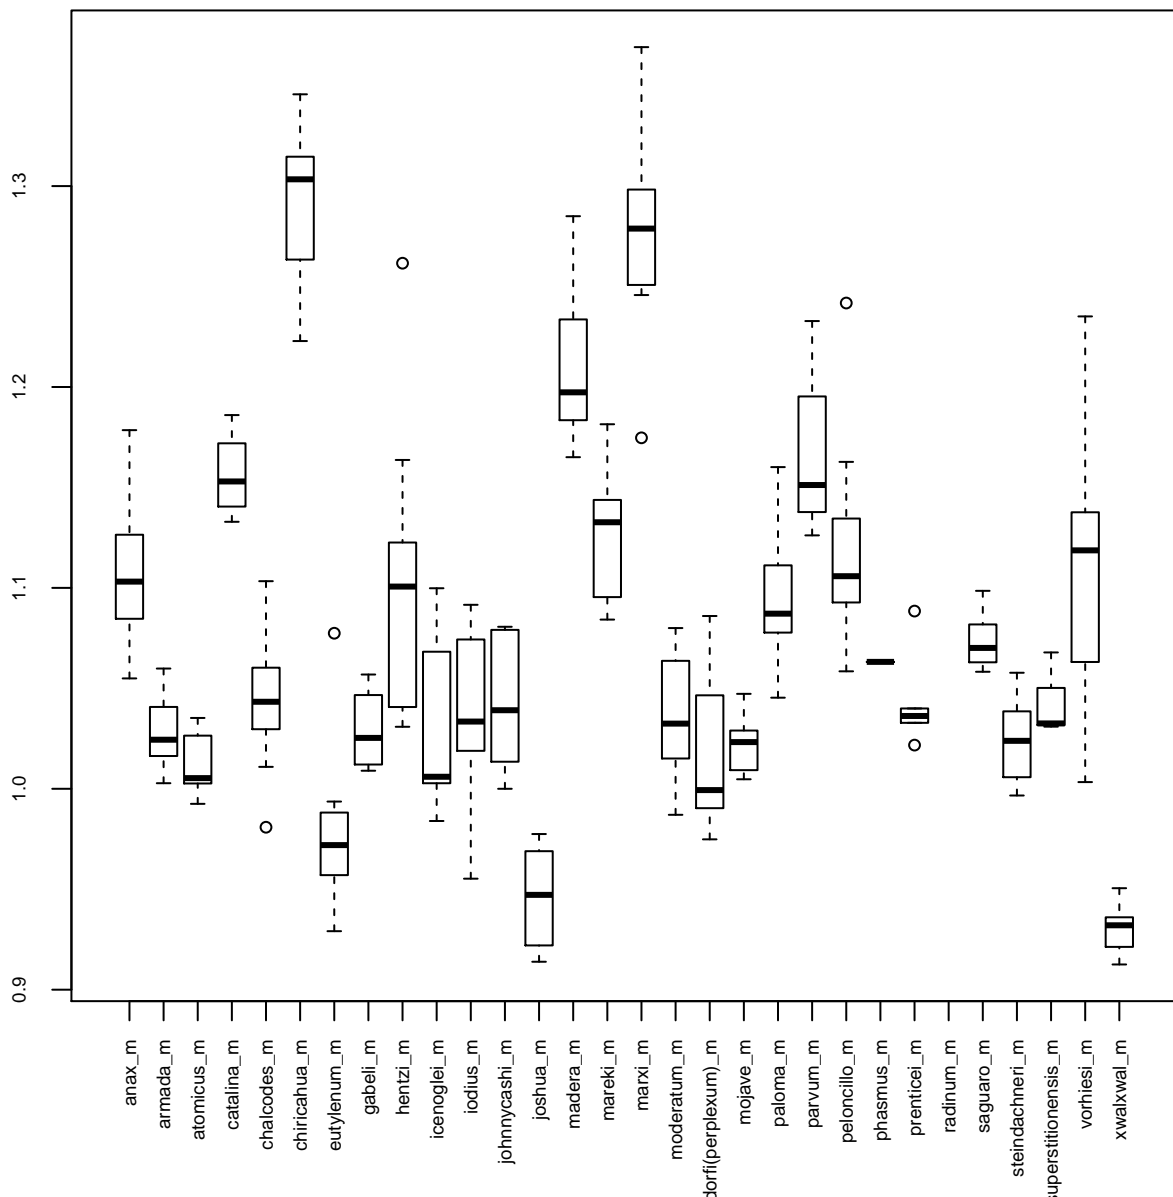

Supplement: Supplementary file 825

## Palpal Tibia/Metatarsus 1 Length ratio – males

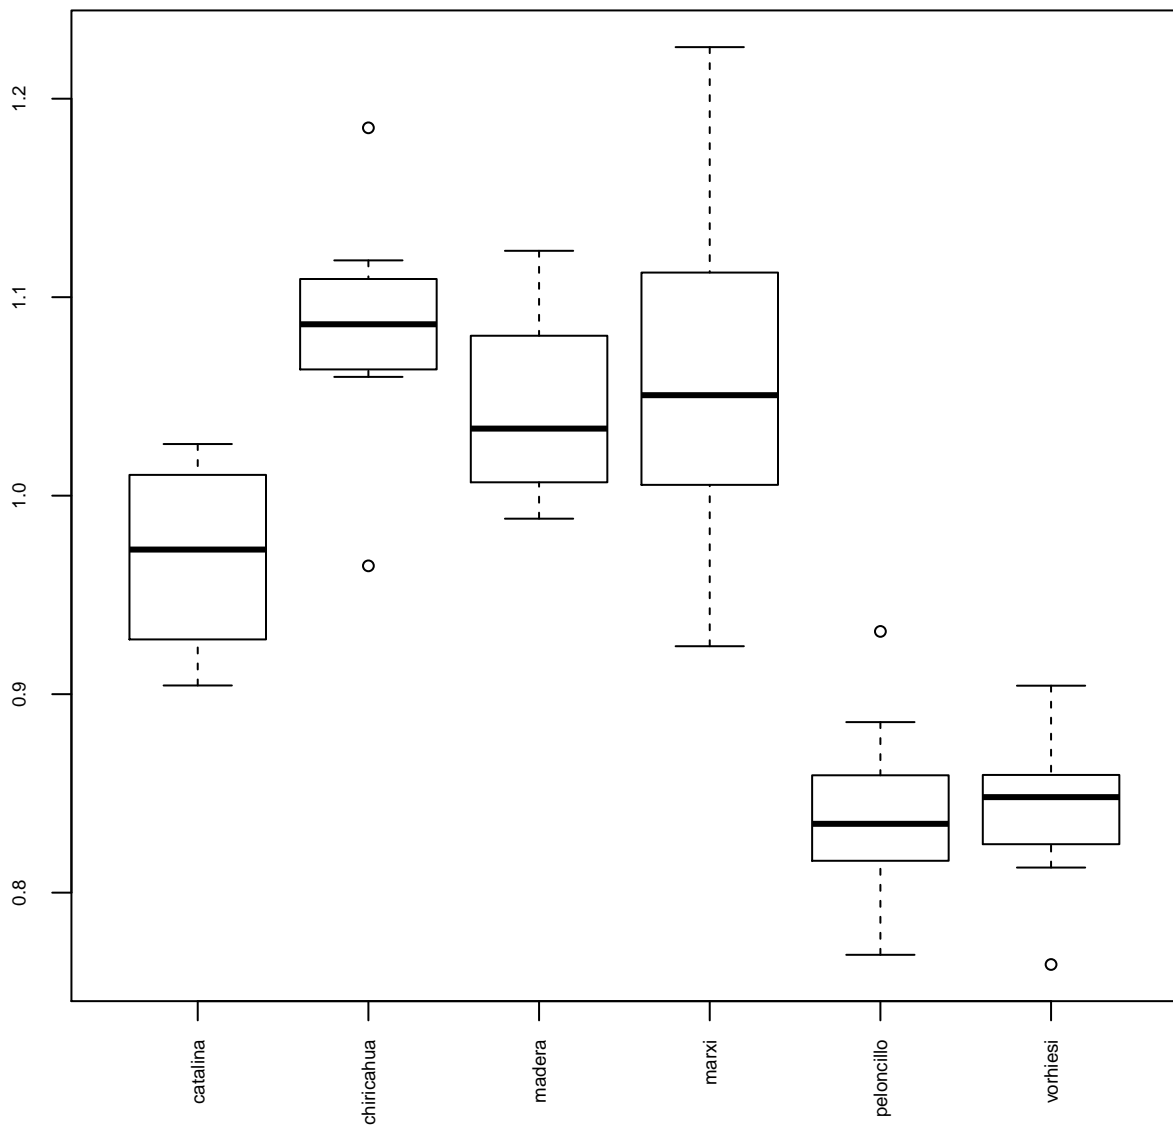

Supplement: Supplementary file 826

# Metatarsus 1/Metatarsus 4 ratio – males

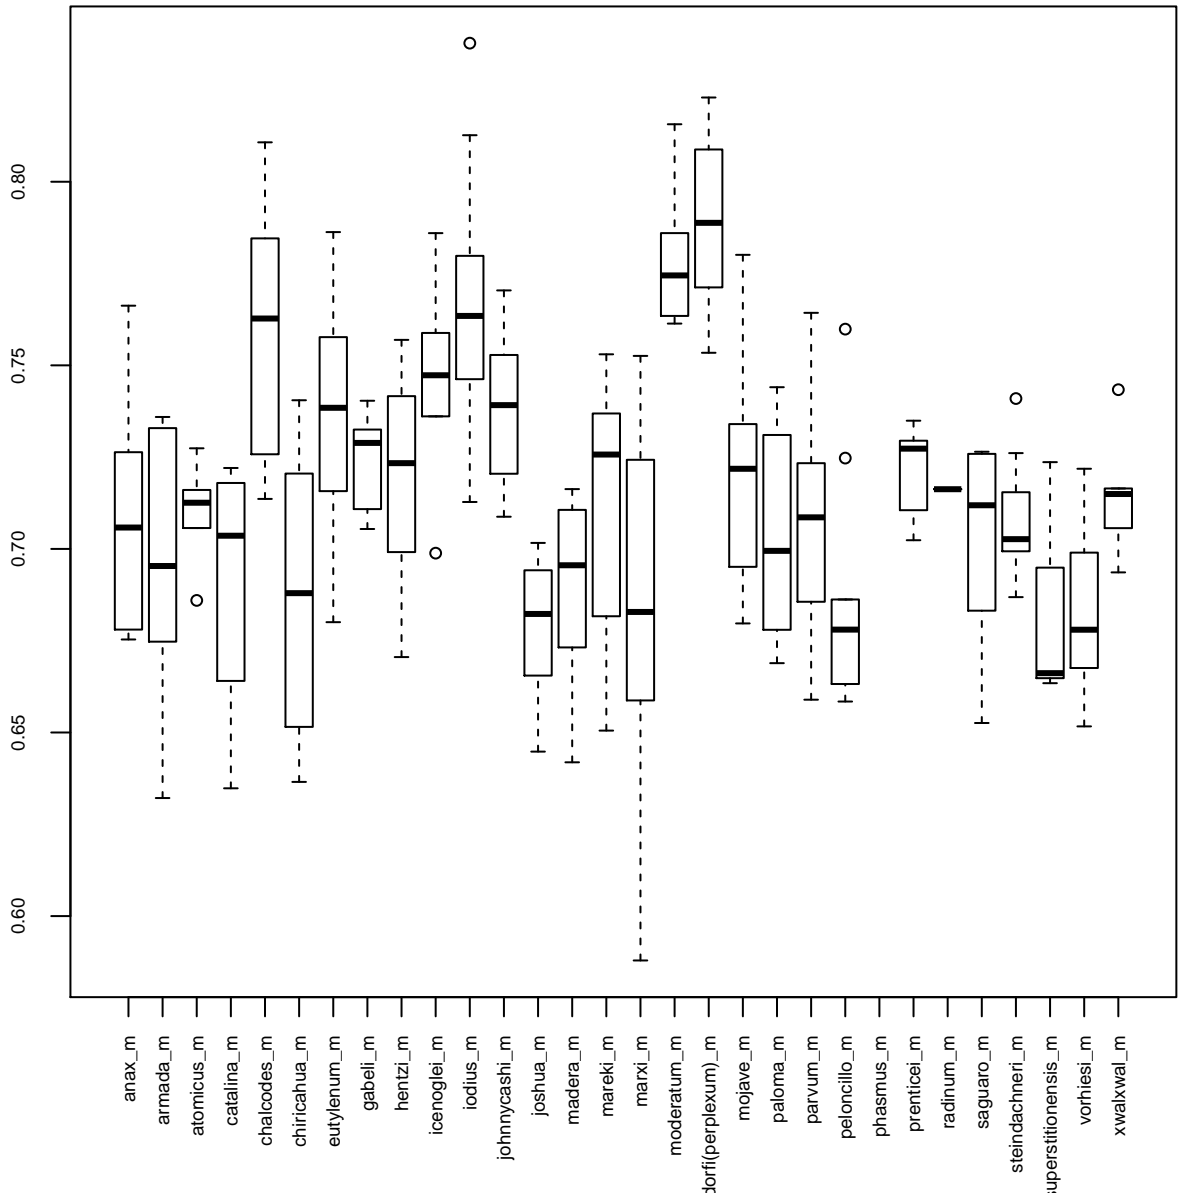

Supplement: Supplementary file 827

# Metatarsus 1/Tarsus 4 Length ratio – males

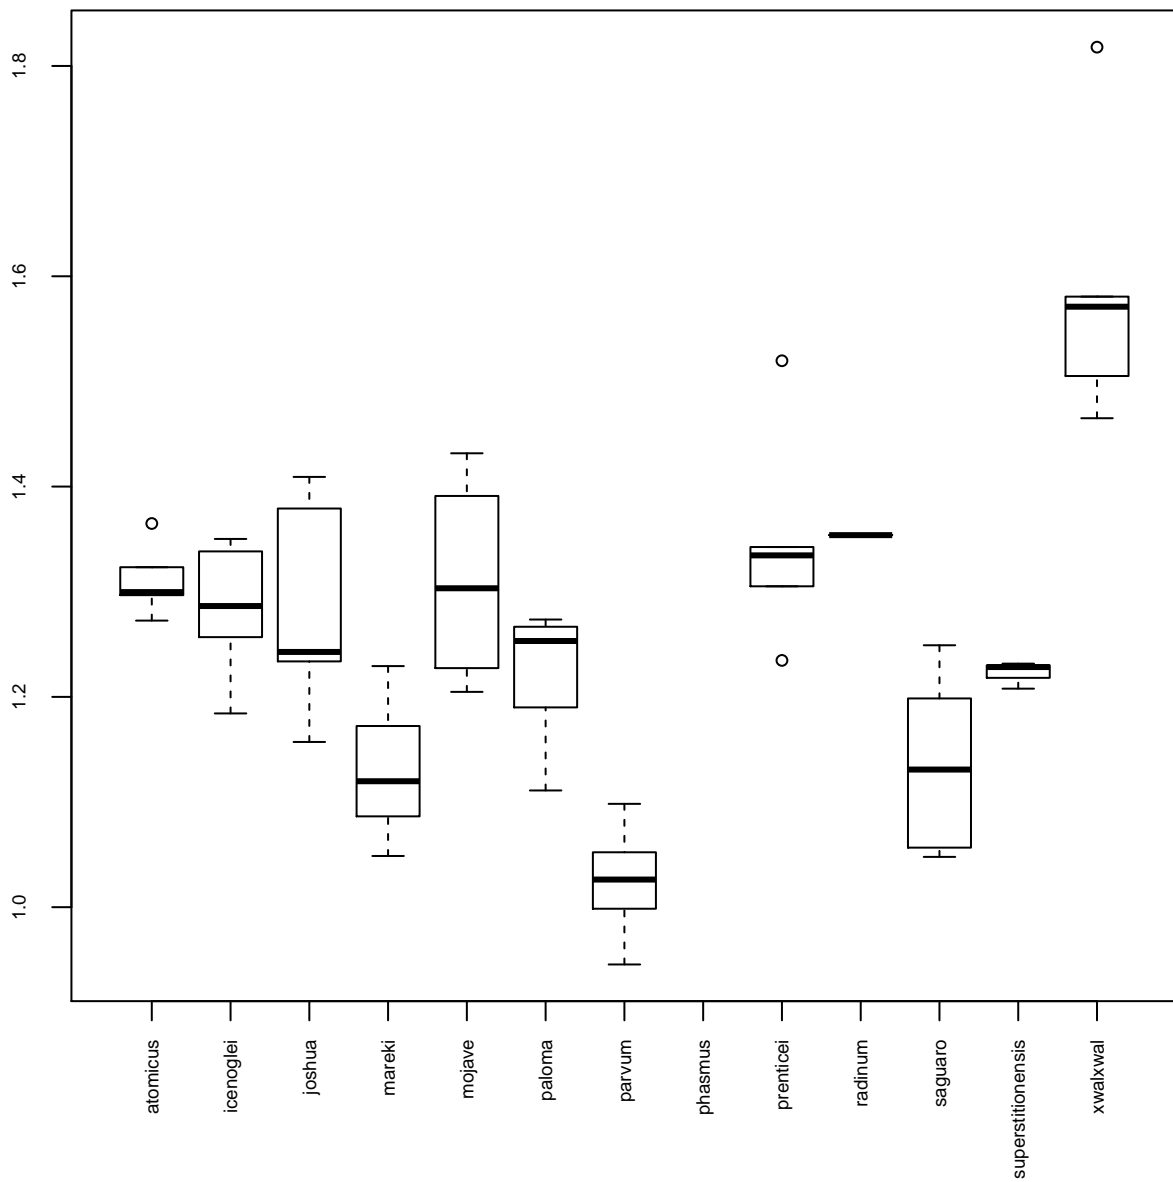

Supplement: Supplementary file 828

## Tibia 4/Metatarsus 4 ratio – males

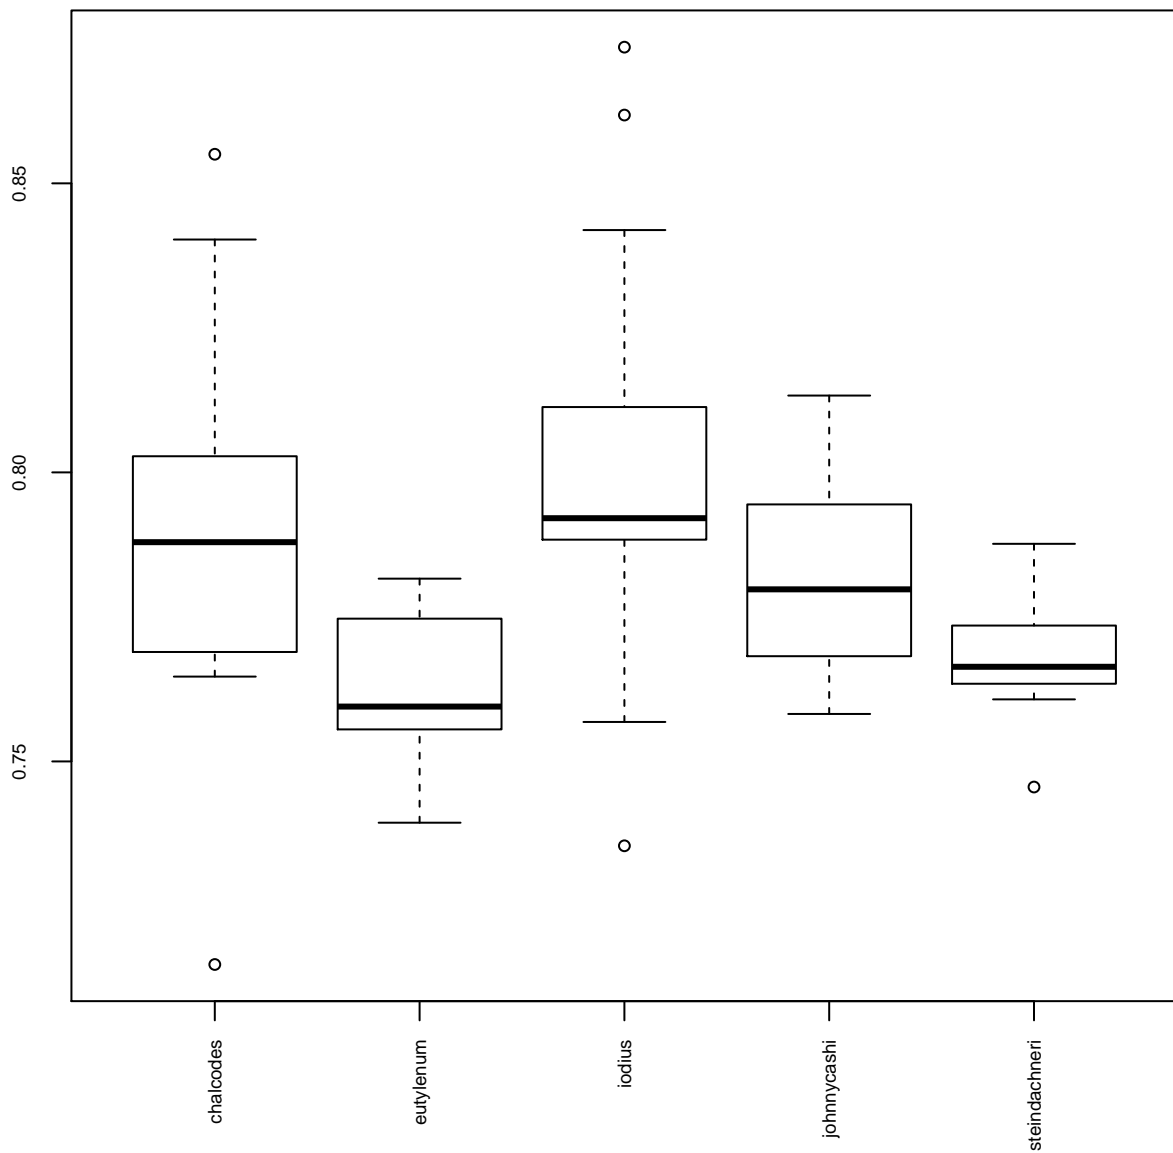

Supplement: Supplementary file 829

## Patella 1/Tibia 1 ratio – females

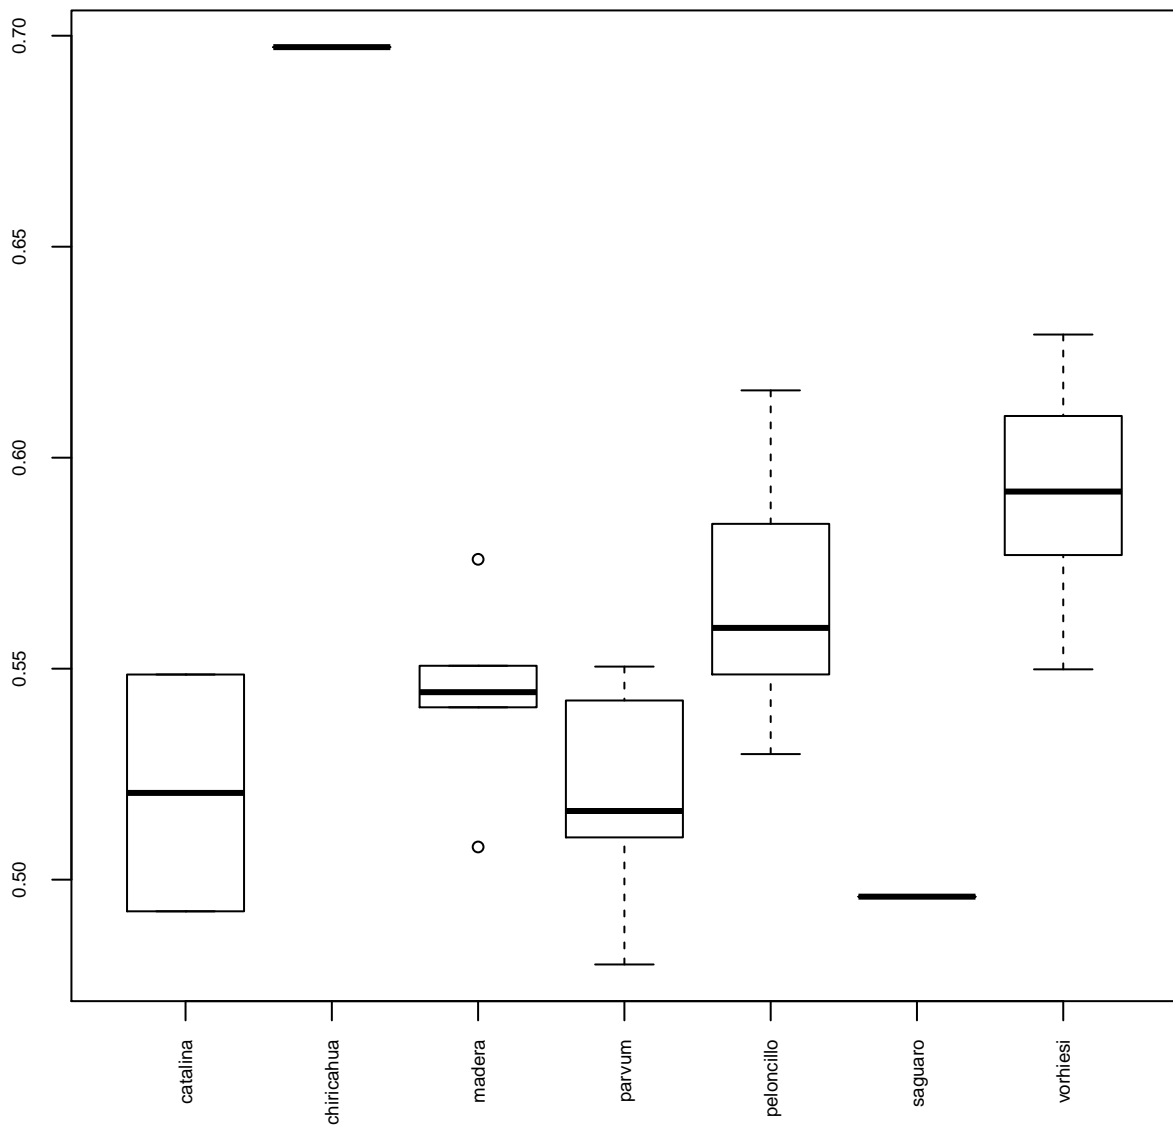

Supplement: Supplementary file 830

## Femur 1/Tarsus 3 ratio – females

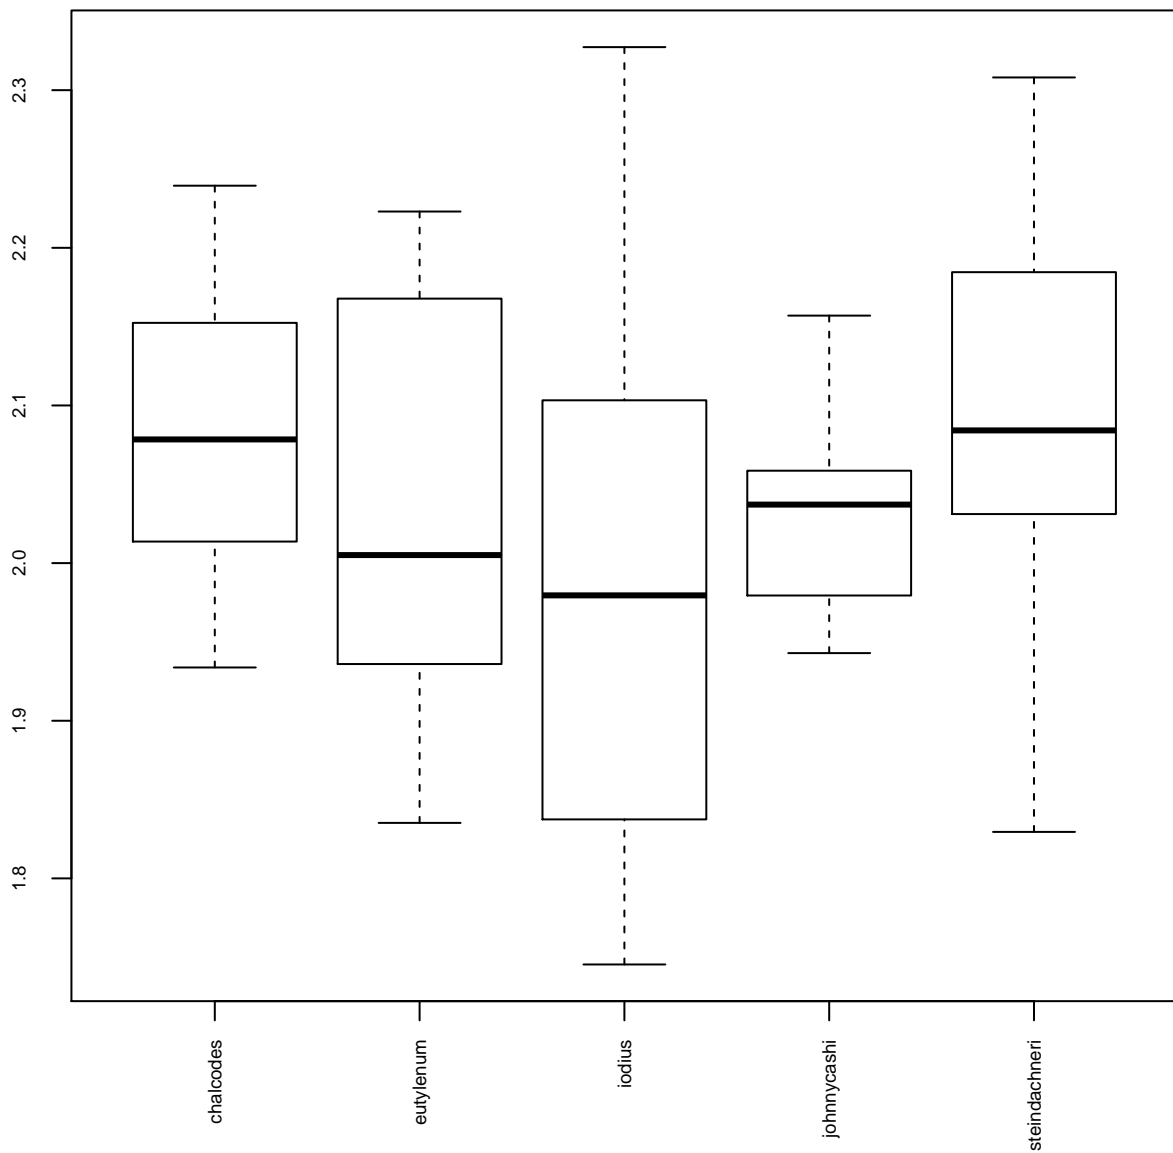

Supplement: Supplementary file 831

## Femur 3/Metatarsus 3 ratio – females

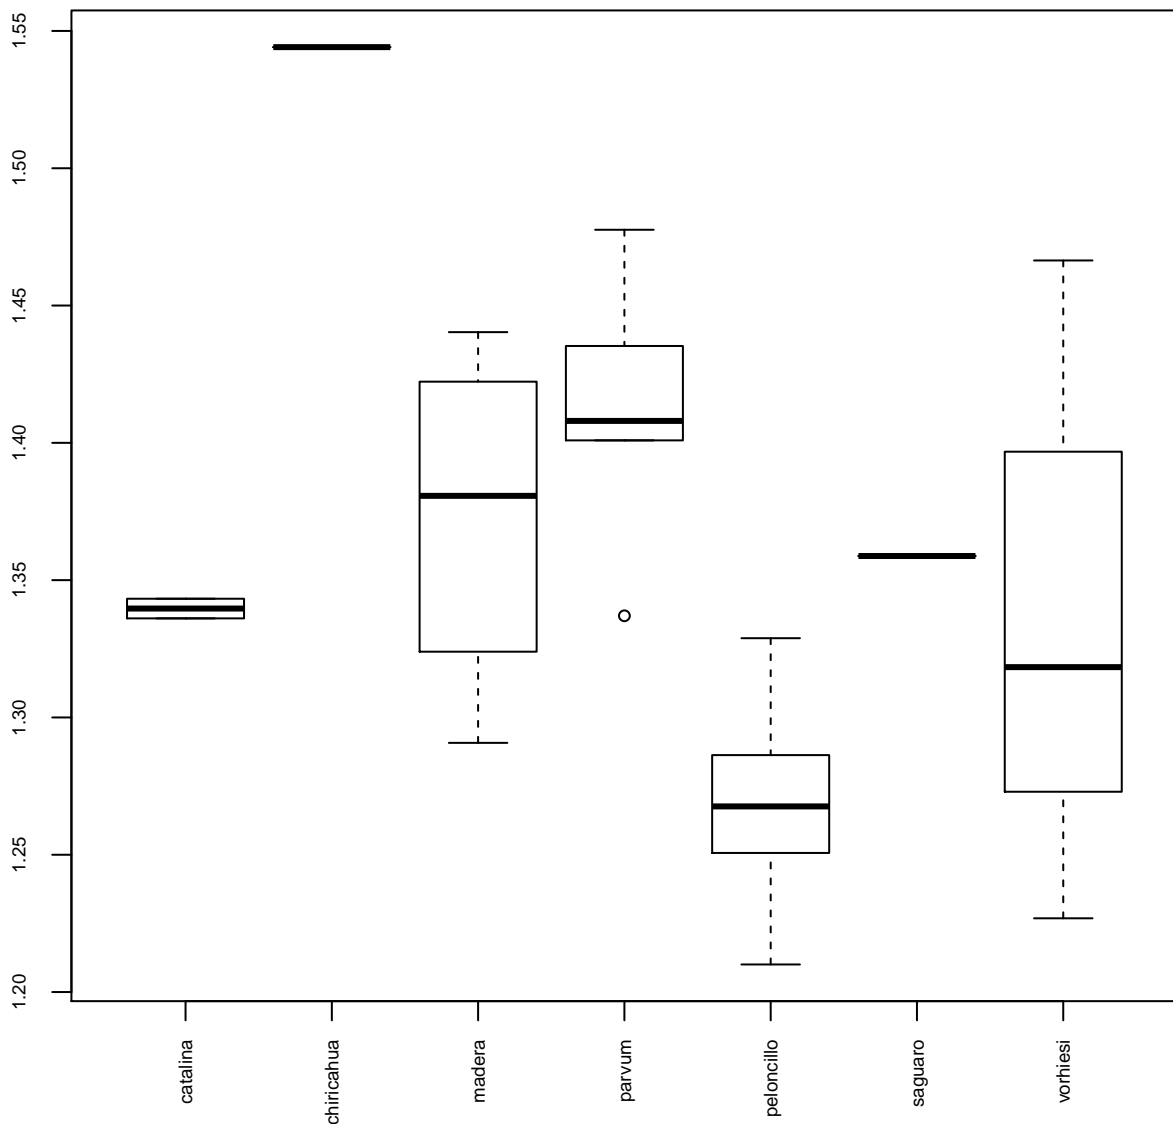

Supplement: Supplementary file 832

## Femur 3/Patella 4 Length ratio – females

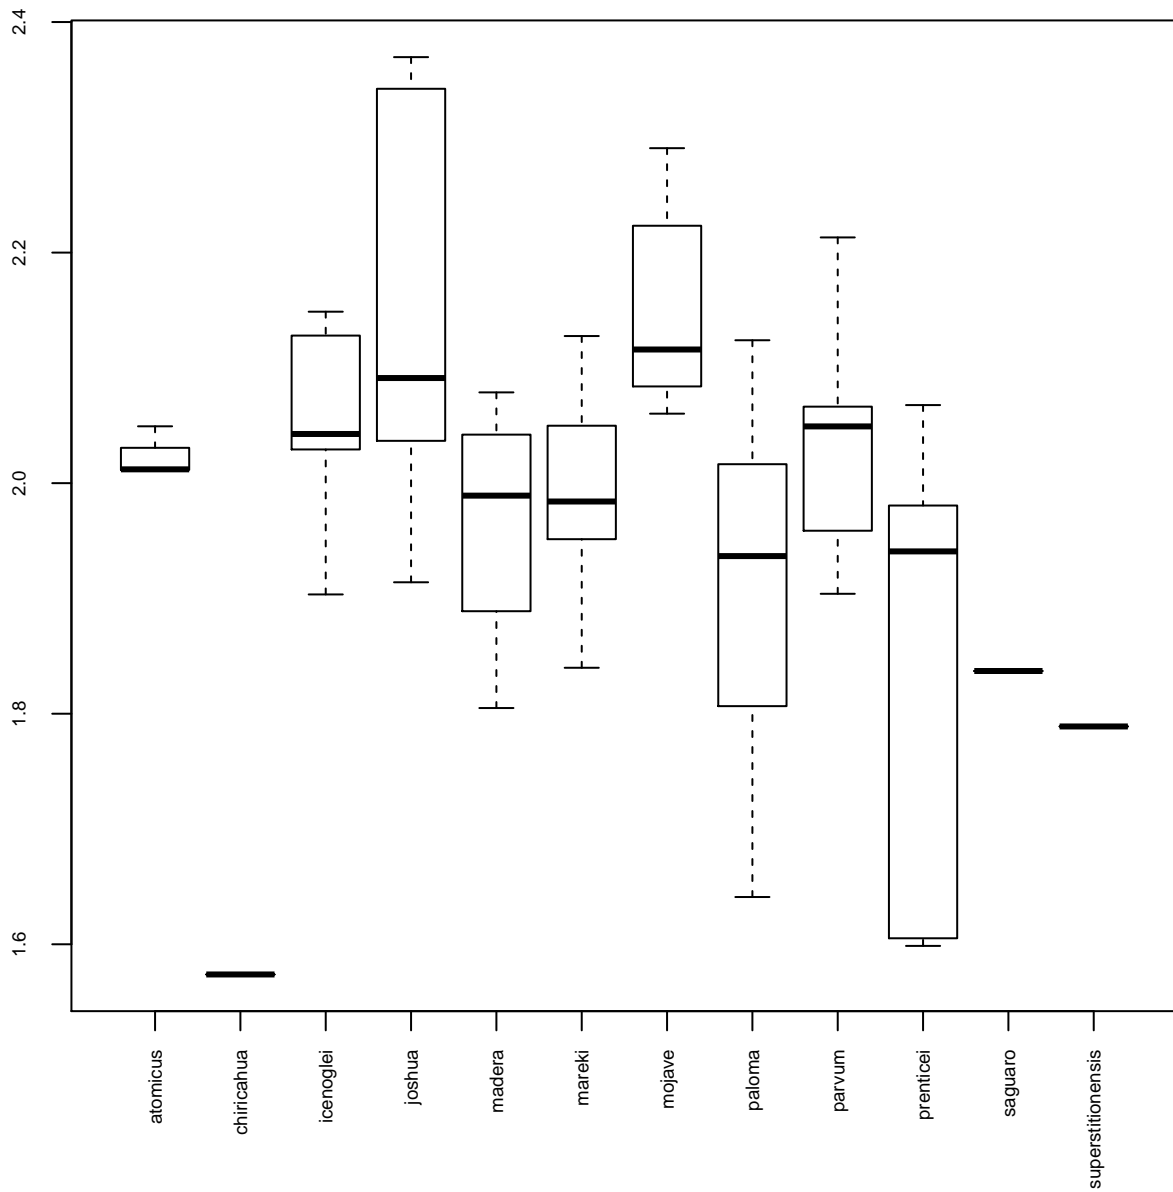

Supplement: Supplementary file 833

## Palpal Tibia/Patella 1 Length ratio – males

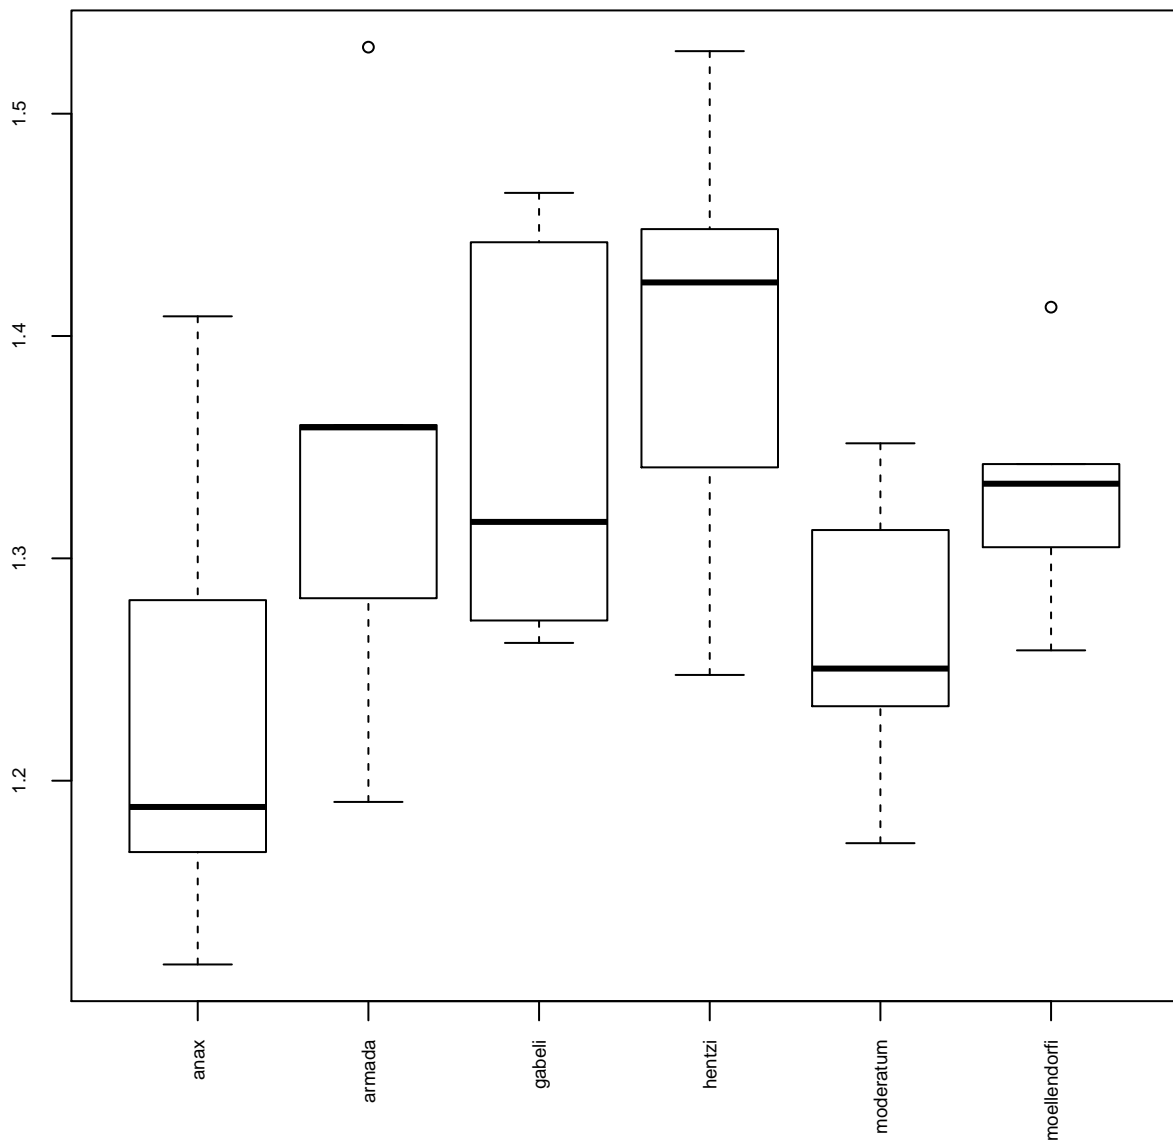

Supplement: Supplementary file 834

## Patella 1/Metatarsus 1 ratio – females

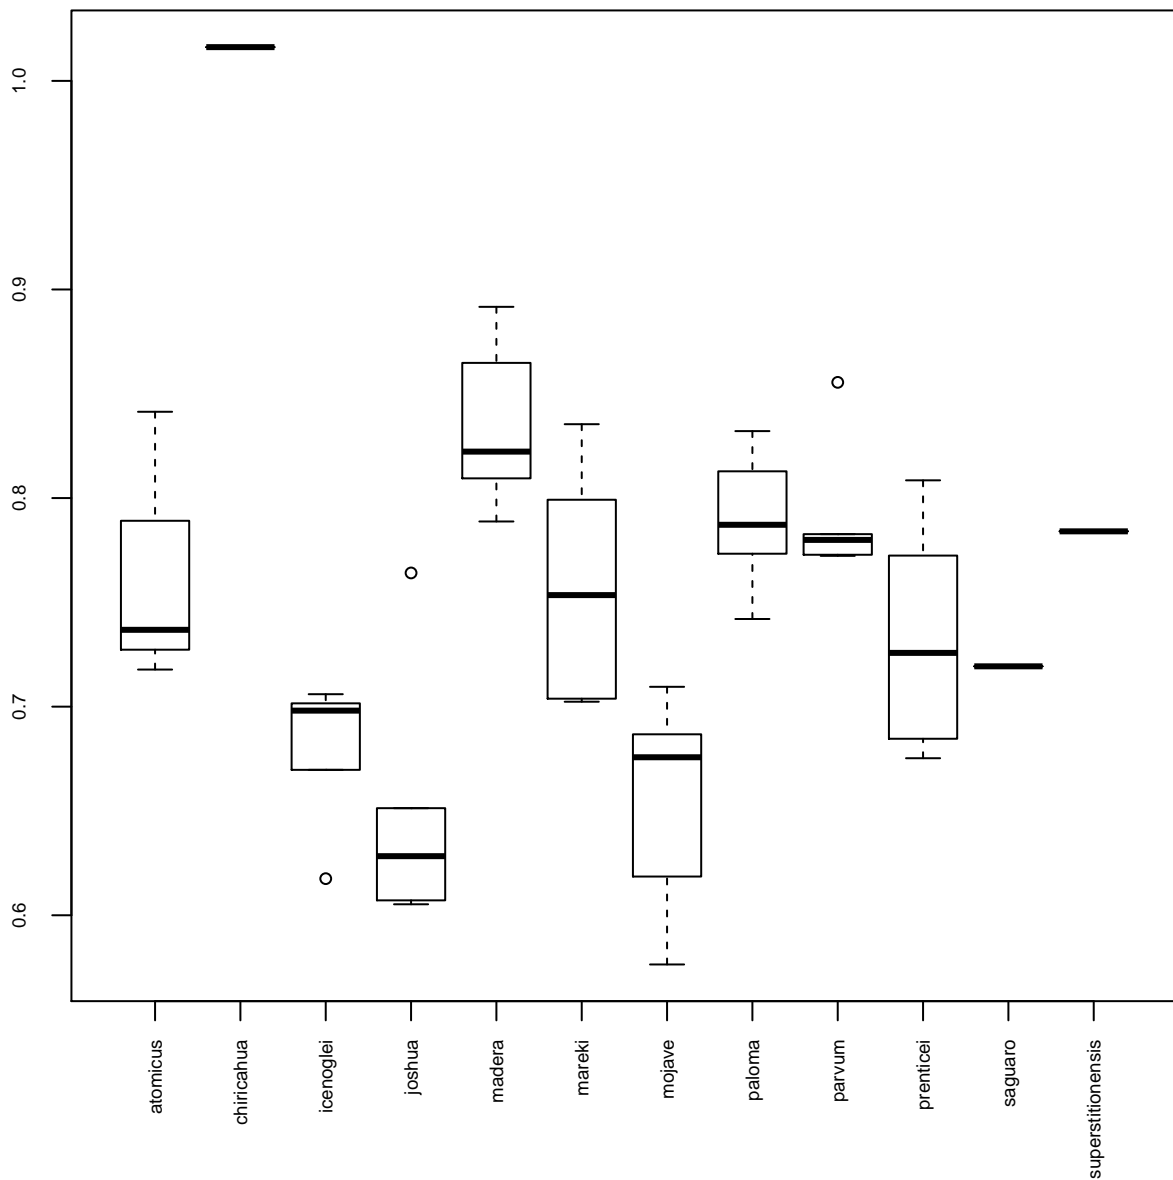

Supplement: Supplementary file 835

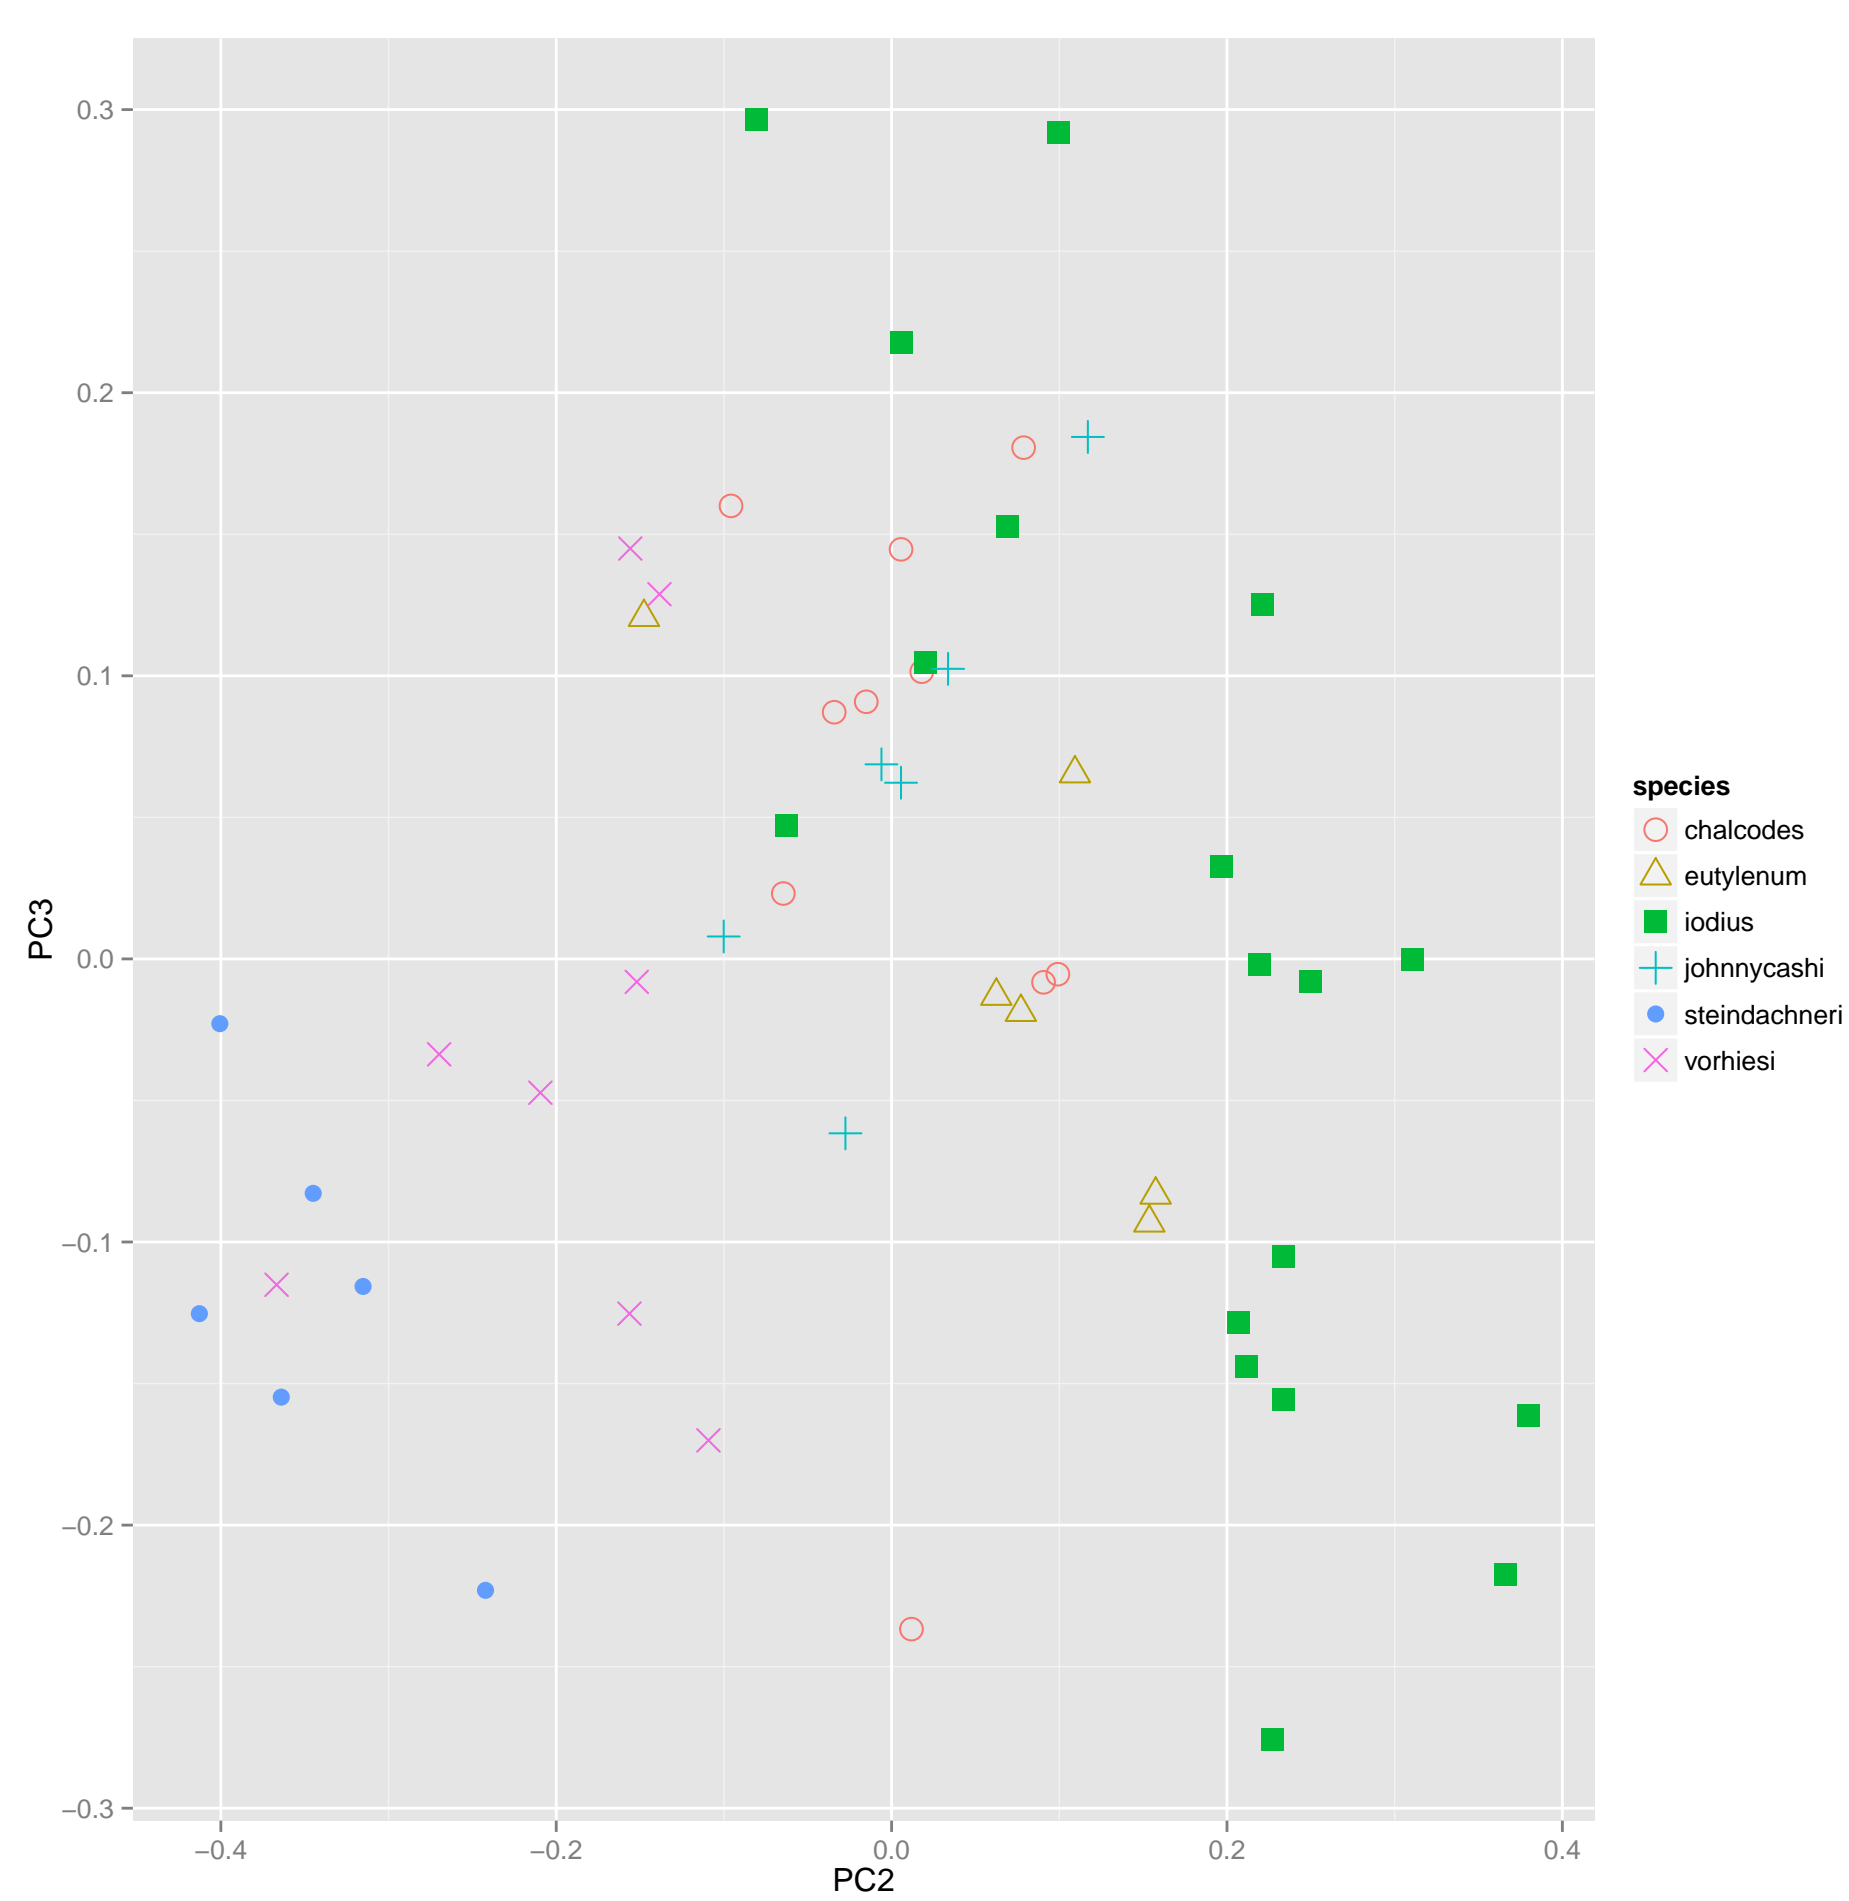

Supplement: Supplementary file 836

## Tibia 3/Femur 4 Length ratio – females

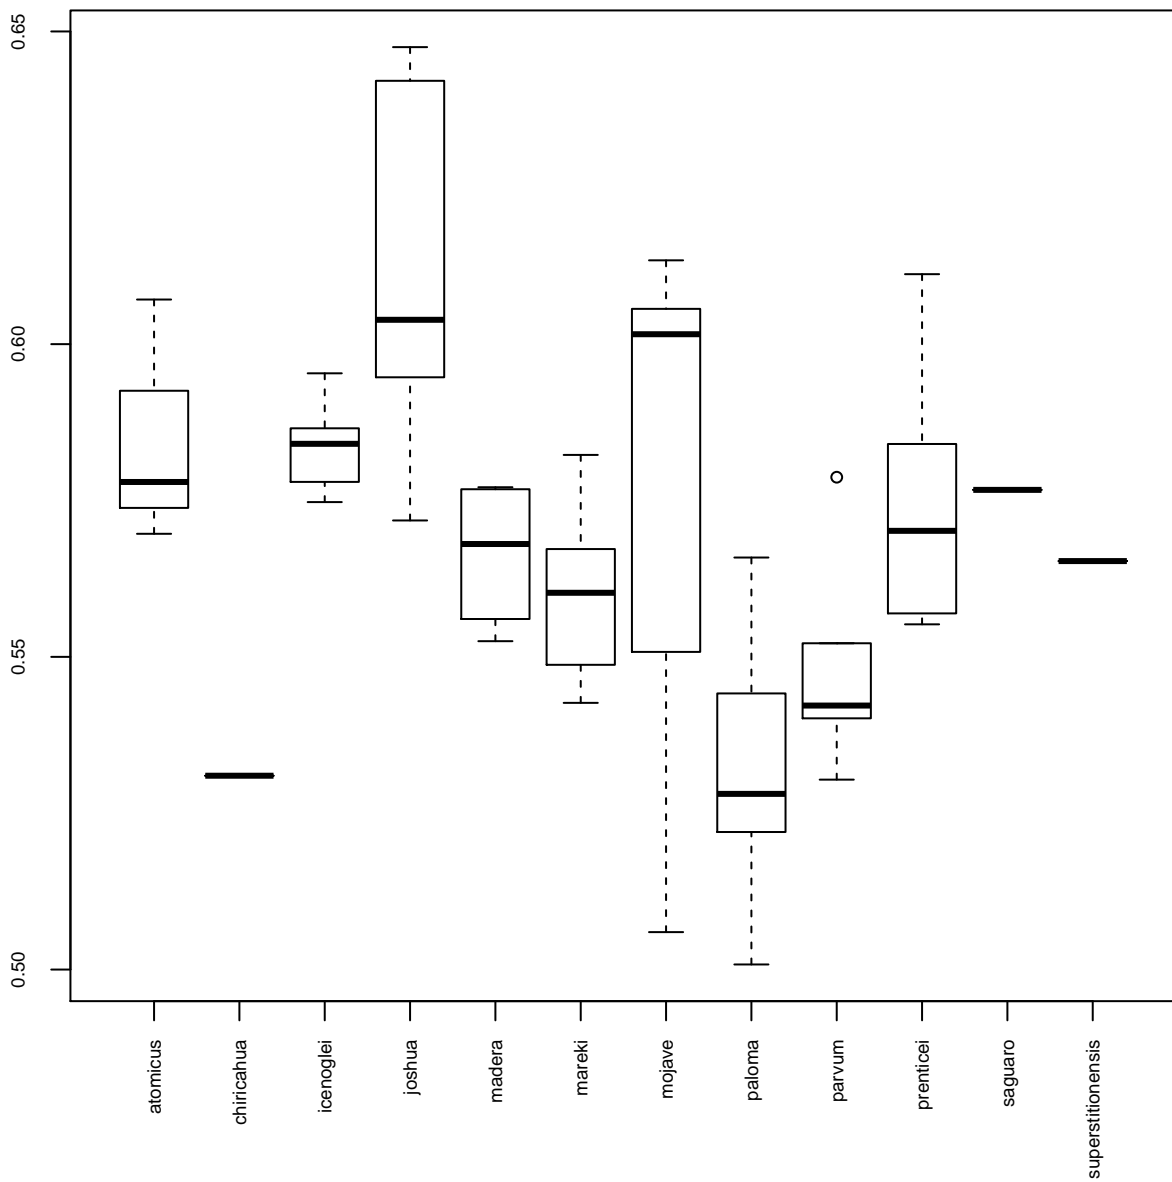

Supplement: Supplementary file 837

## Femur 3/Metatarsus 3 ratio – females

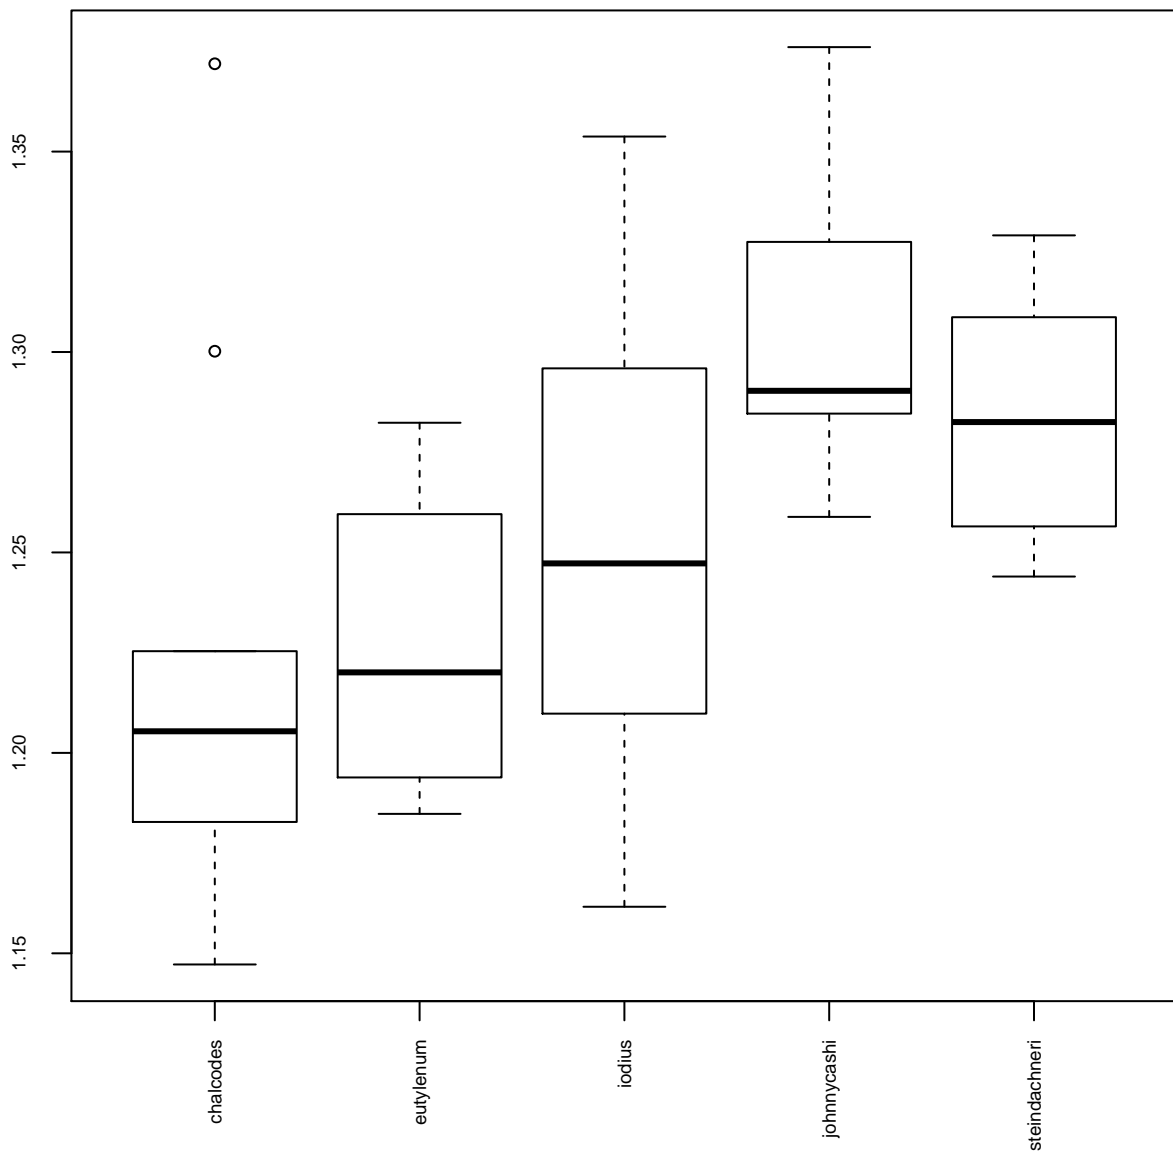

Supplement: Supplementary file 838

## Femur 4 Length/Width ratio – males

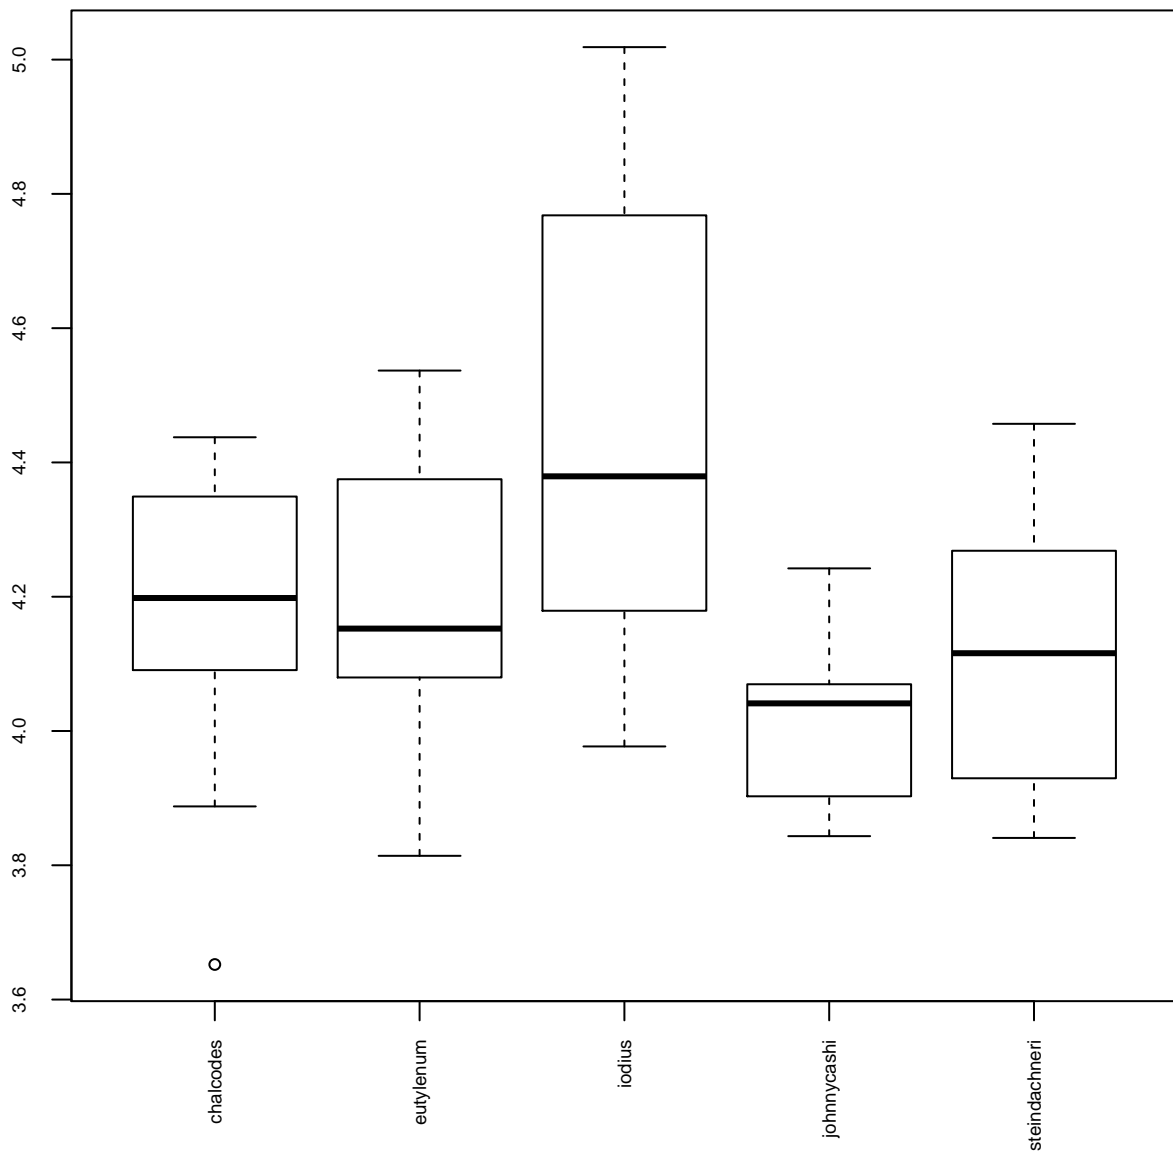

Supplement: Supplementary file 839

## Tarsus 1/Patella 4 Length ratio – males

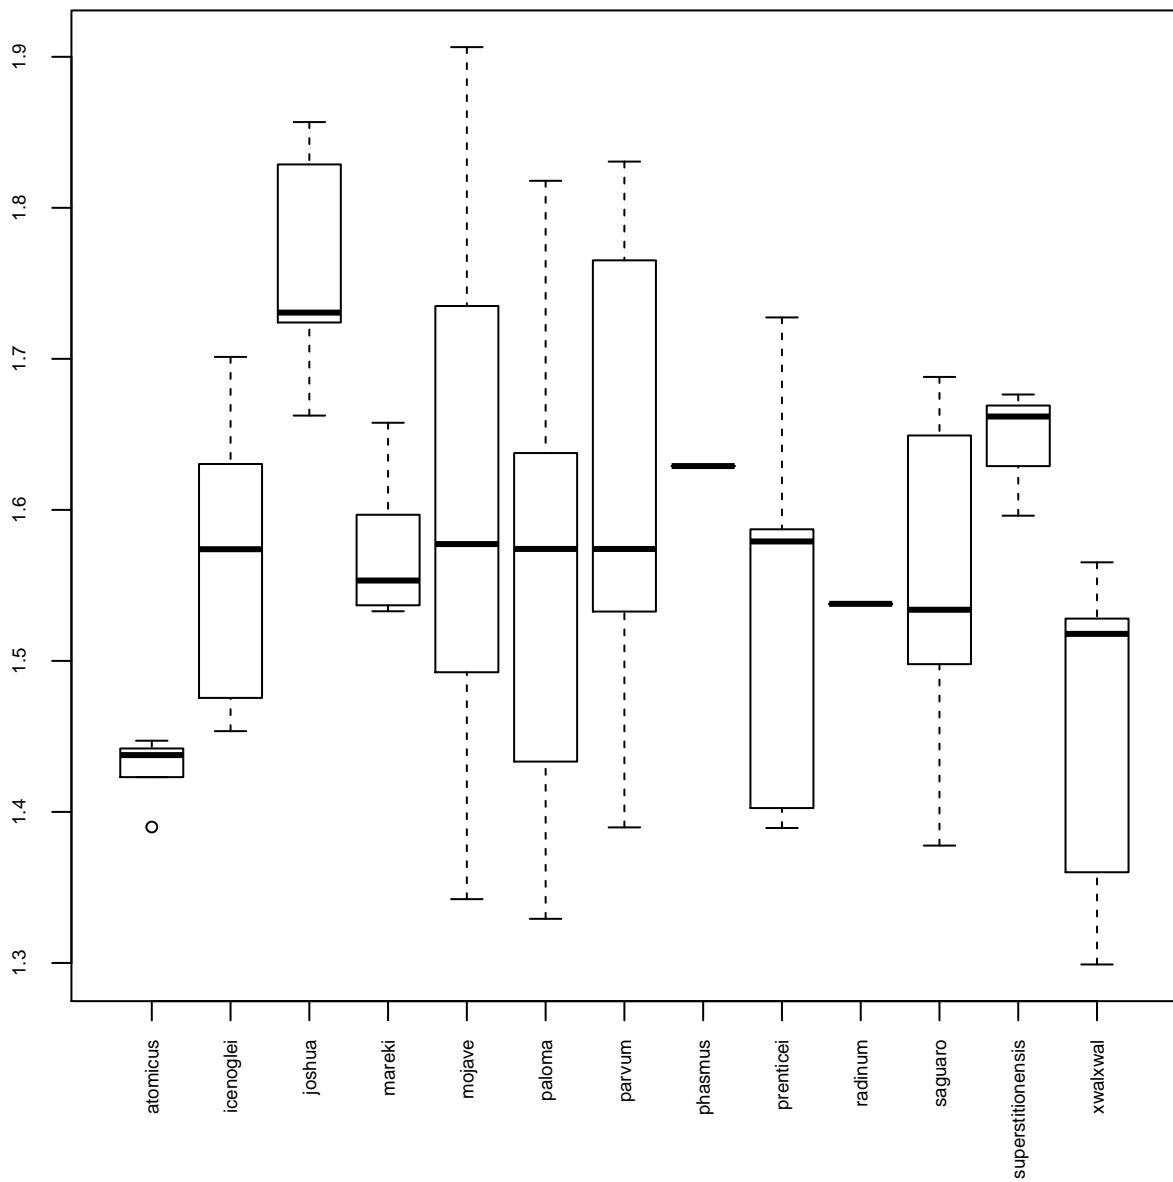

Supplement: Supplementary file 840

## Tarsus 1/Patella 4 Length ratio – males

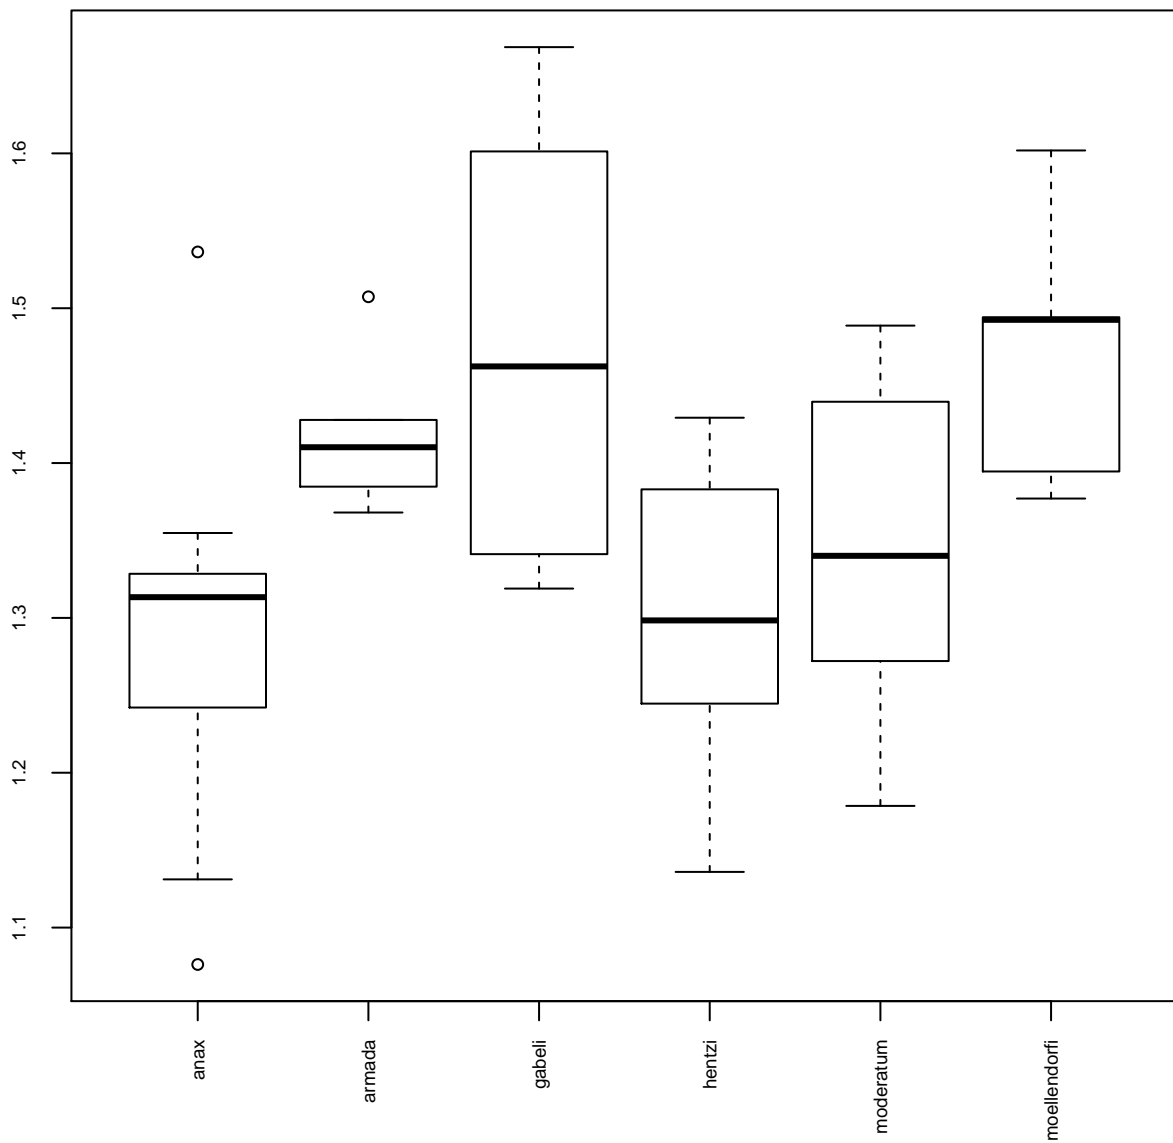

Supplement: Supplementary file 841

## Tibia 1/Femur 4 Length ratio – males

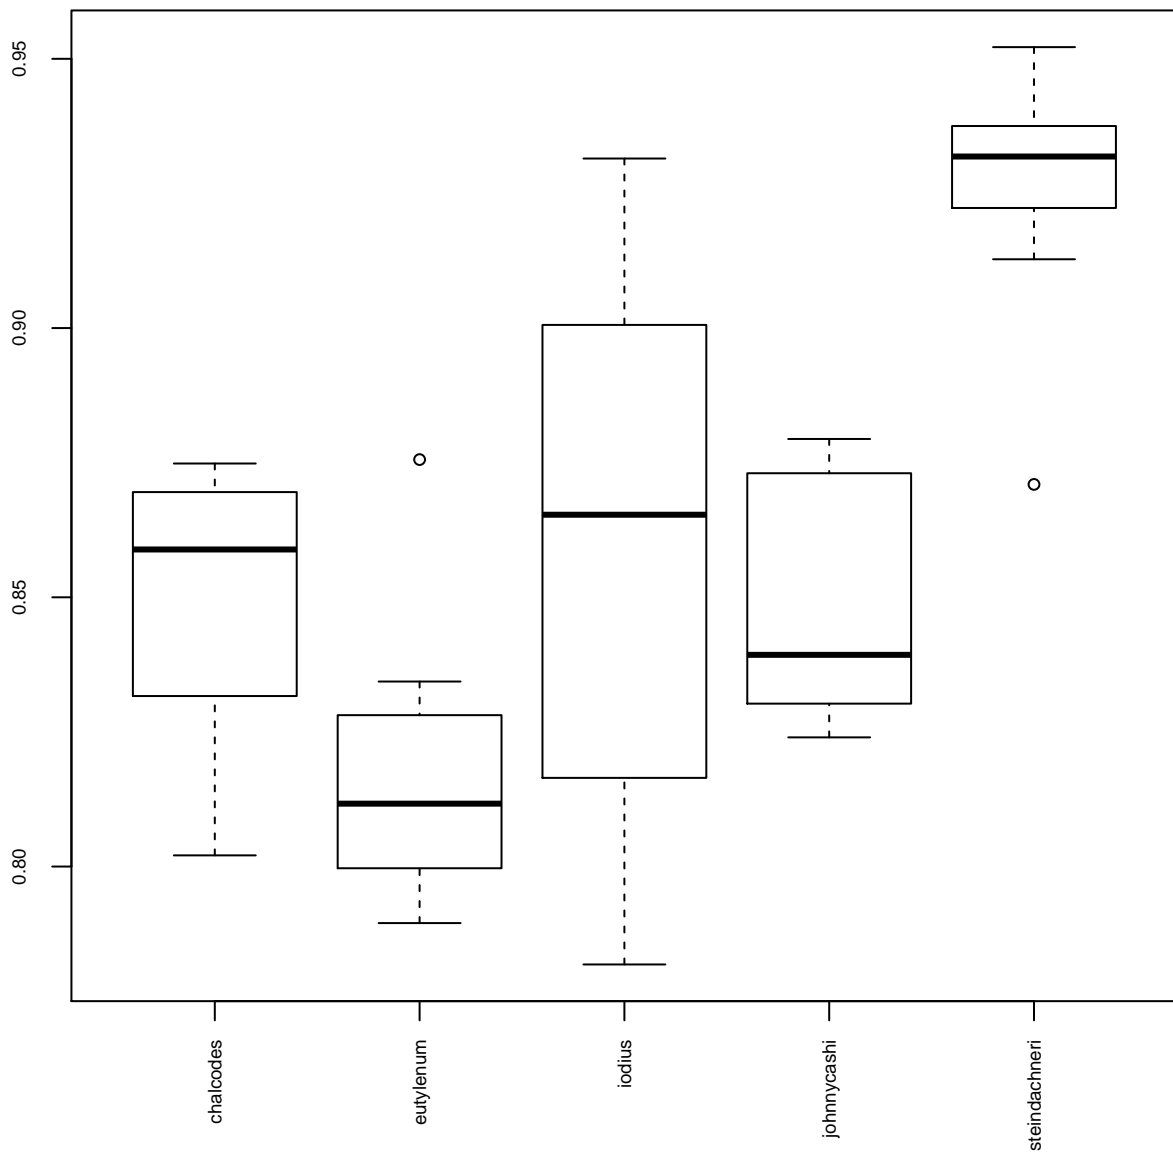

Supplement: Supplementary file 842

## Metatarsus 1/Patella 4 Length ratio – females

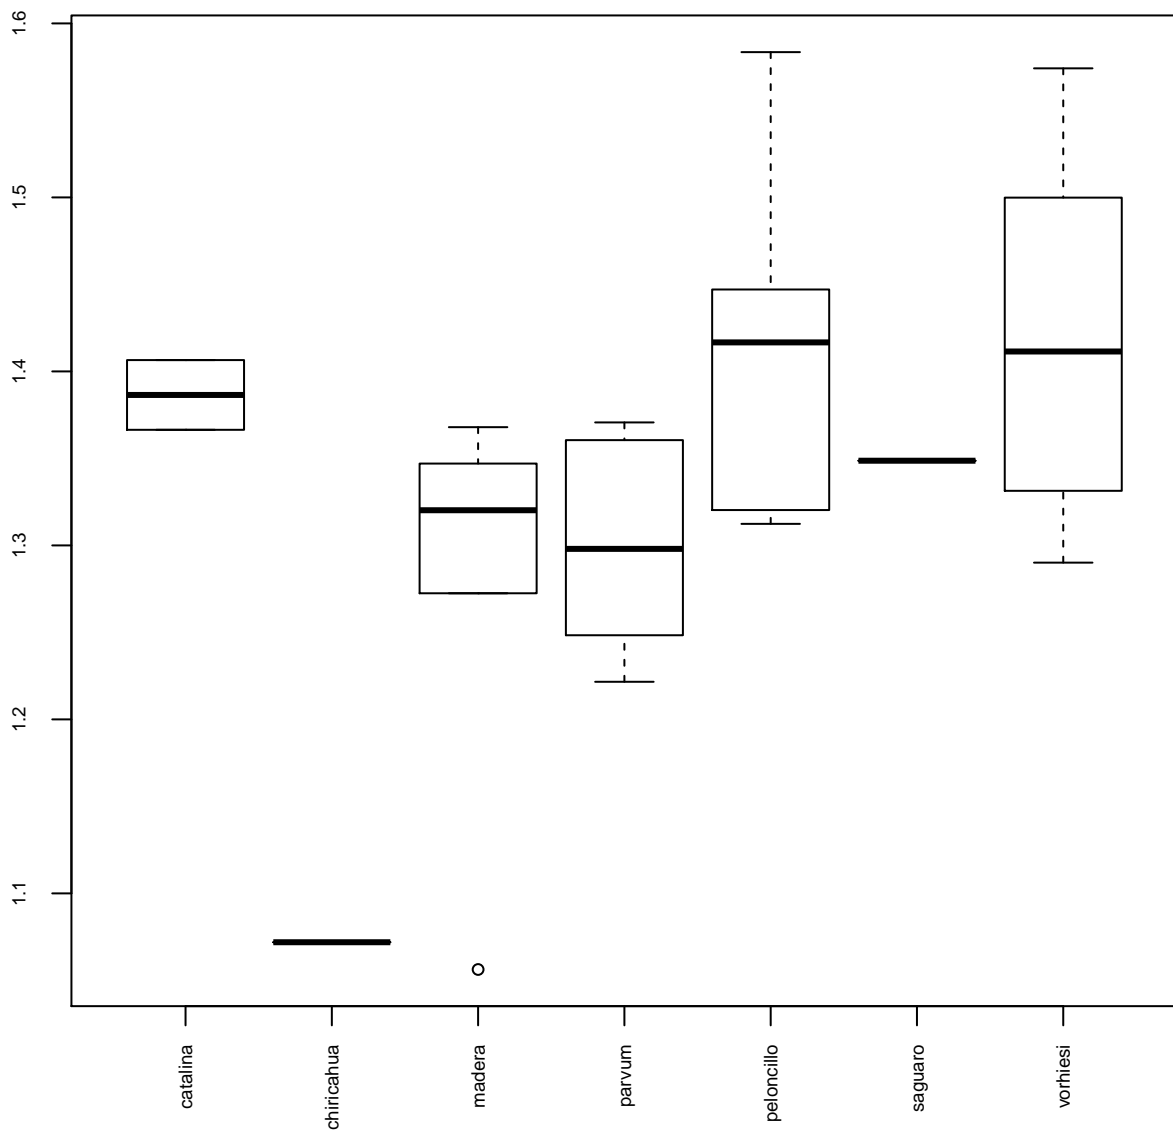

Supplement: Supplementary file 843

## Palpal Tibia/Tibia 3 Length ratio – males

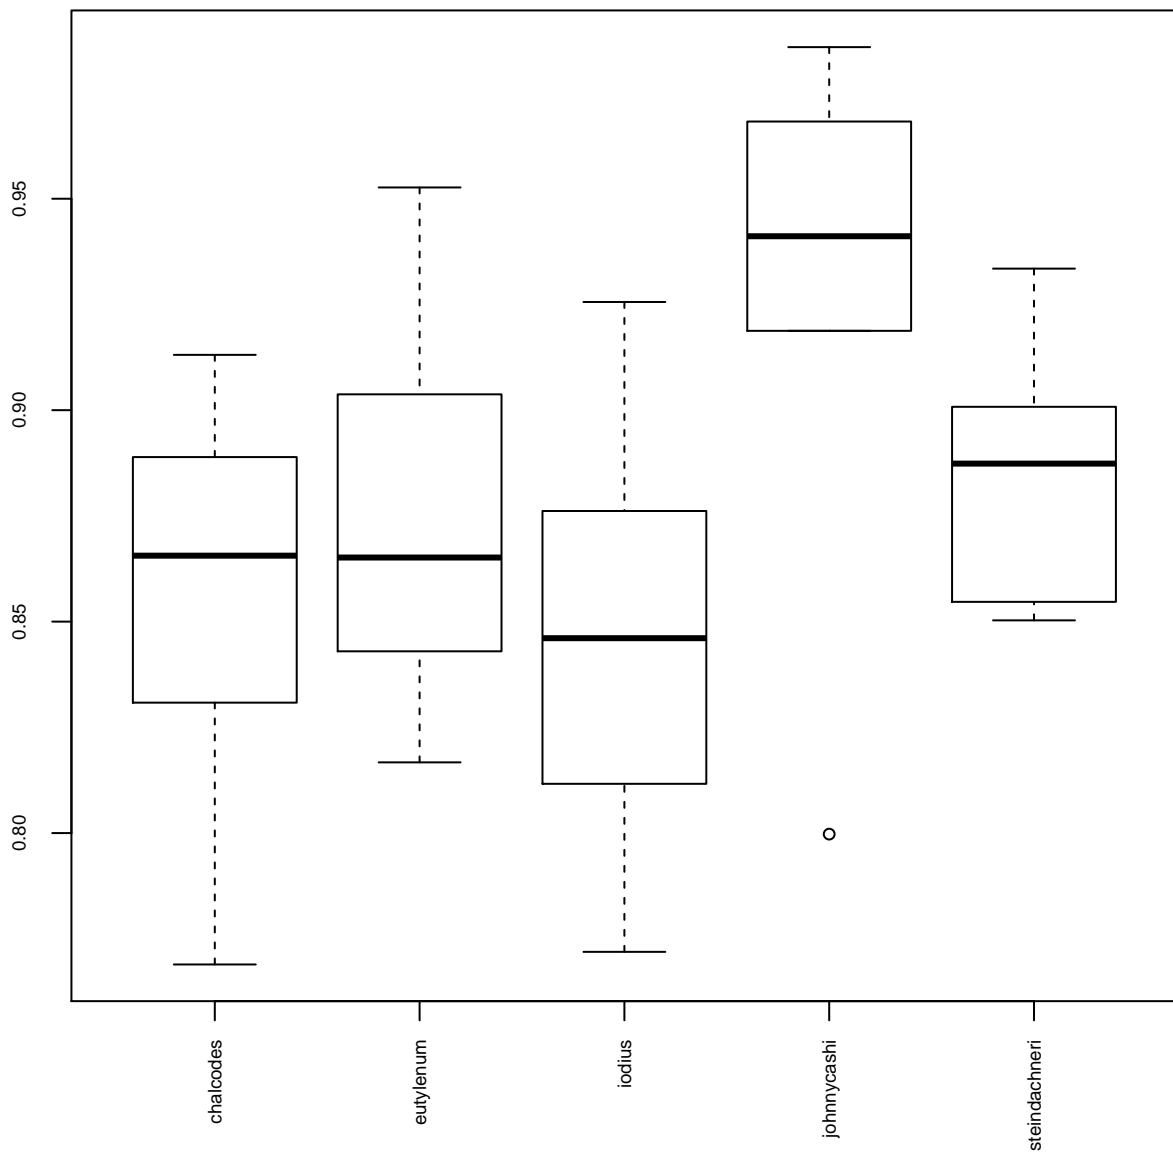

Supplement: Supplementary file 844

## Femur 4 Length/Width ratio – females

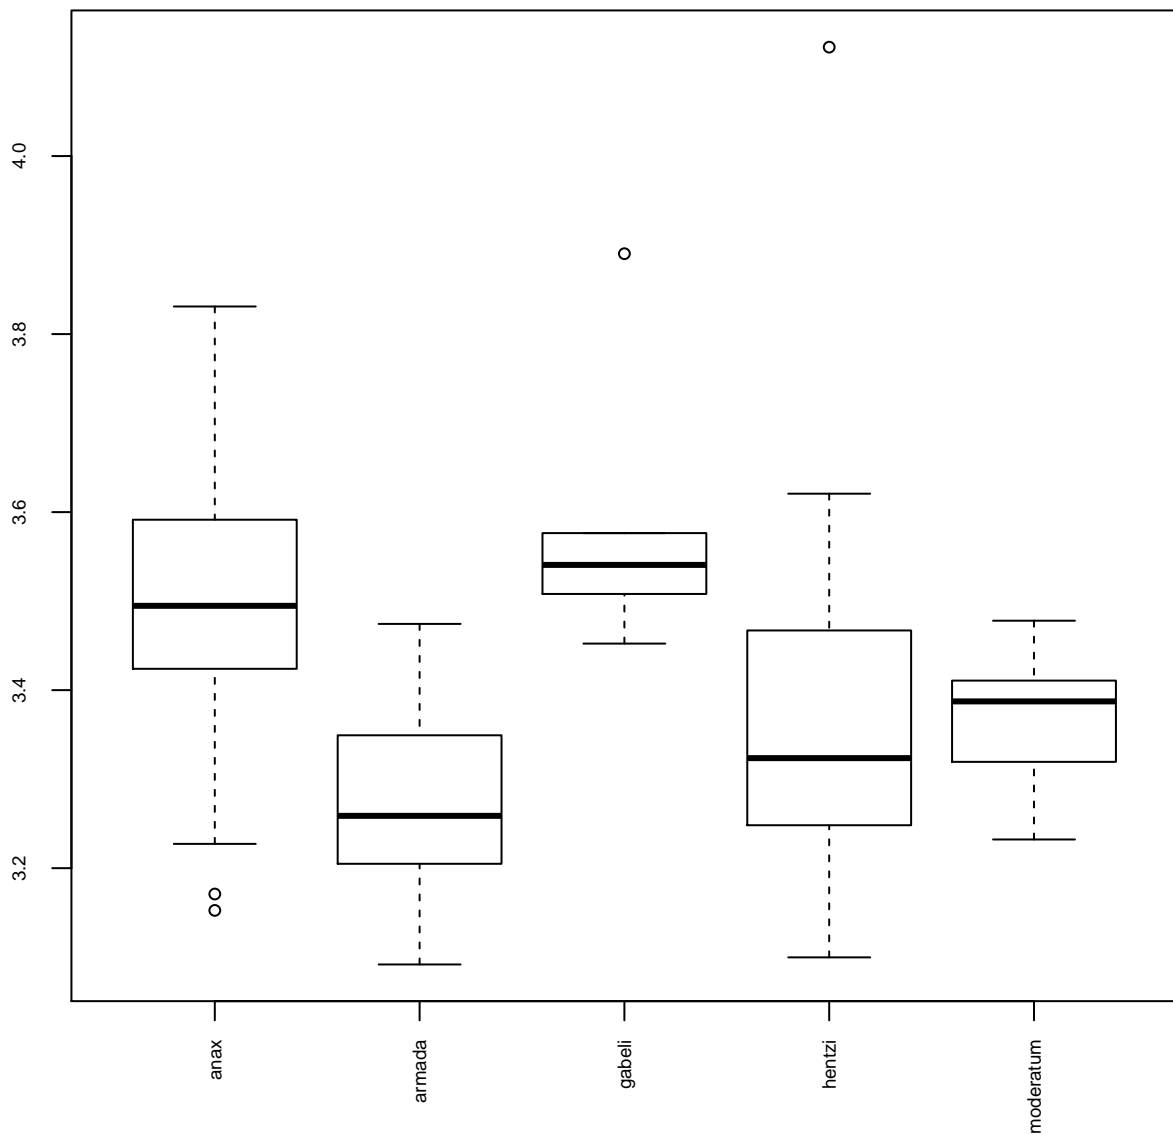

Supplement: Supplementary file 845

# Patella 1/Femur 3 Length ratio – males

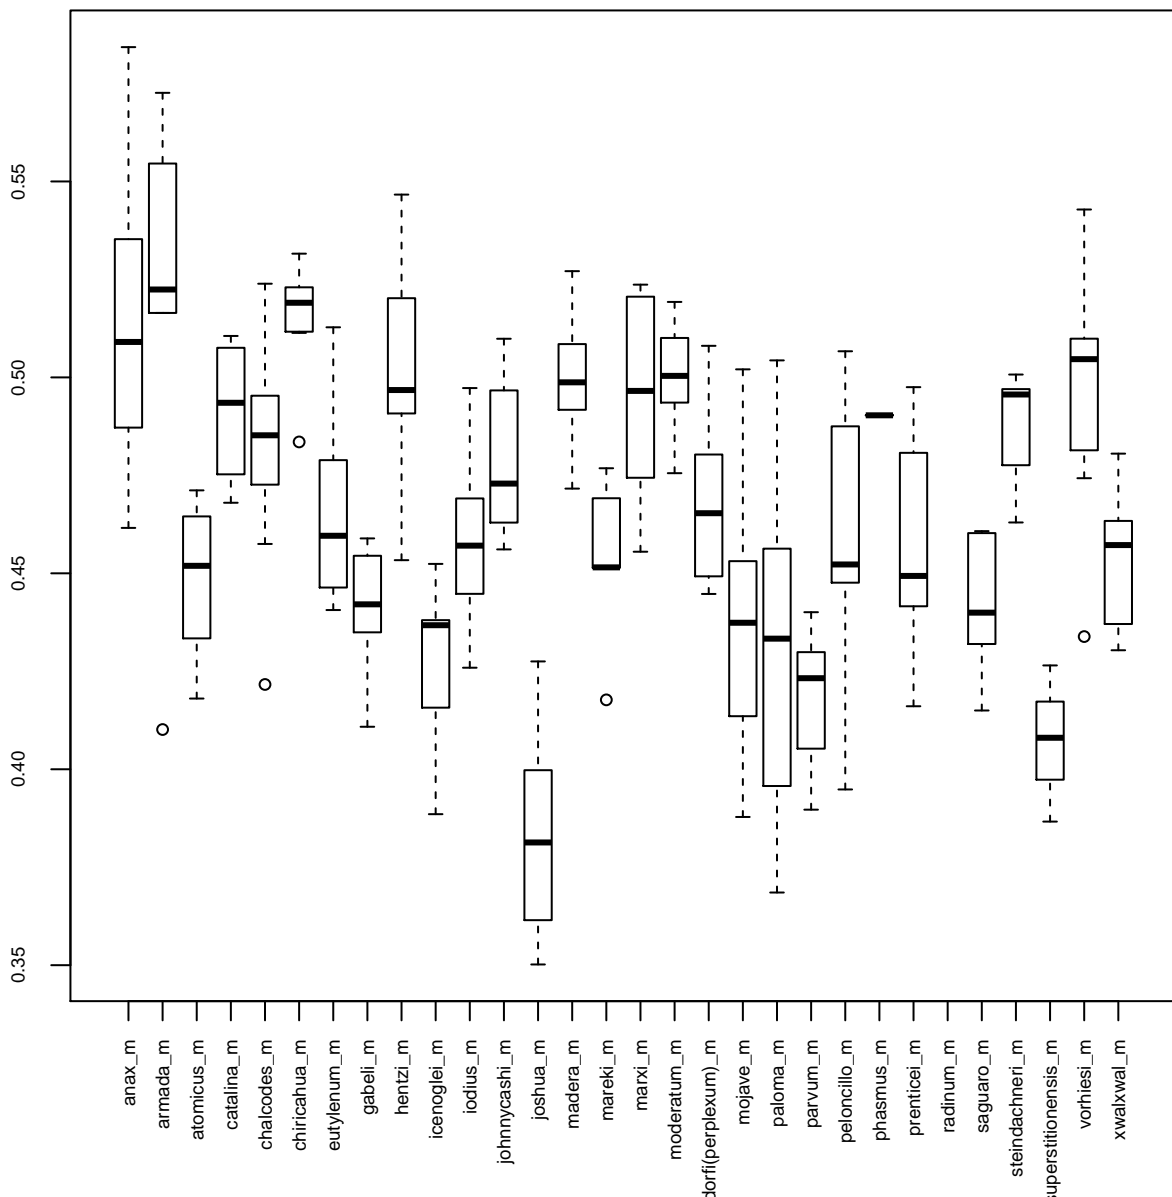

Supplement: Supplementary file 846

## Labial Length/Width ratio – females

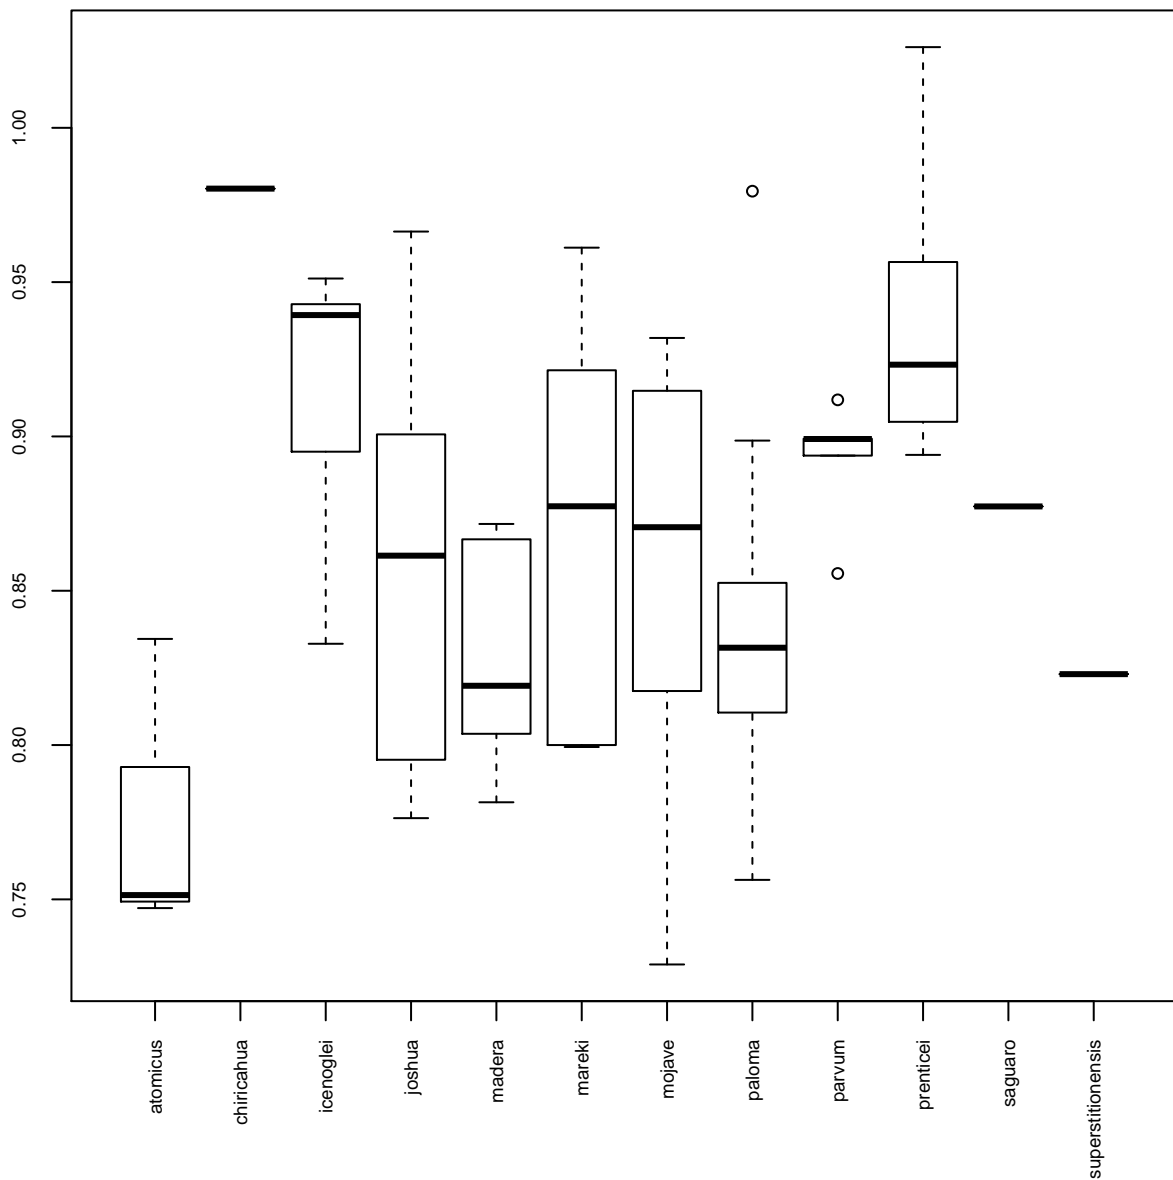

Supplement: Supplementary file 847

## Patella 1/Femur 3 Length ratio – females

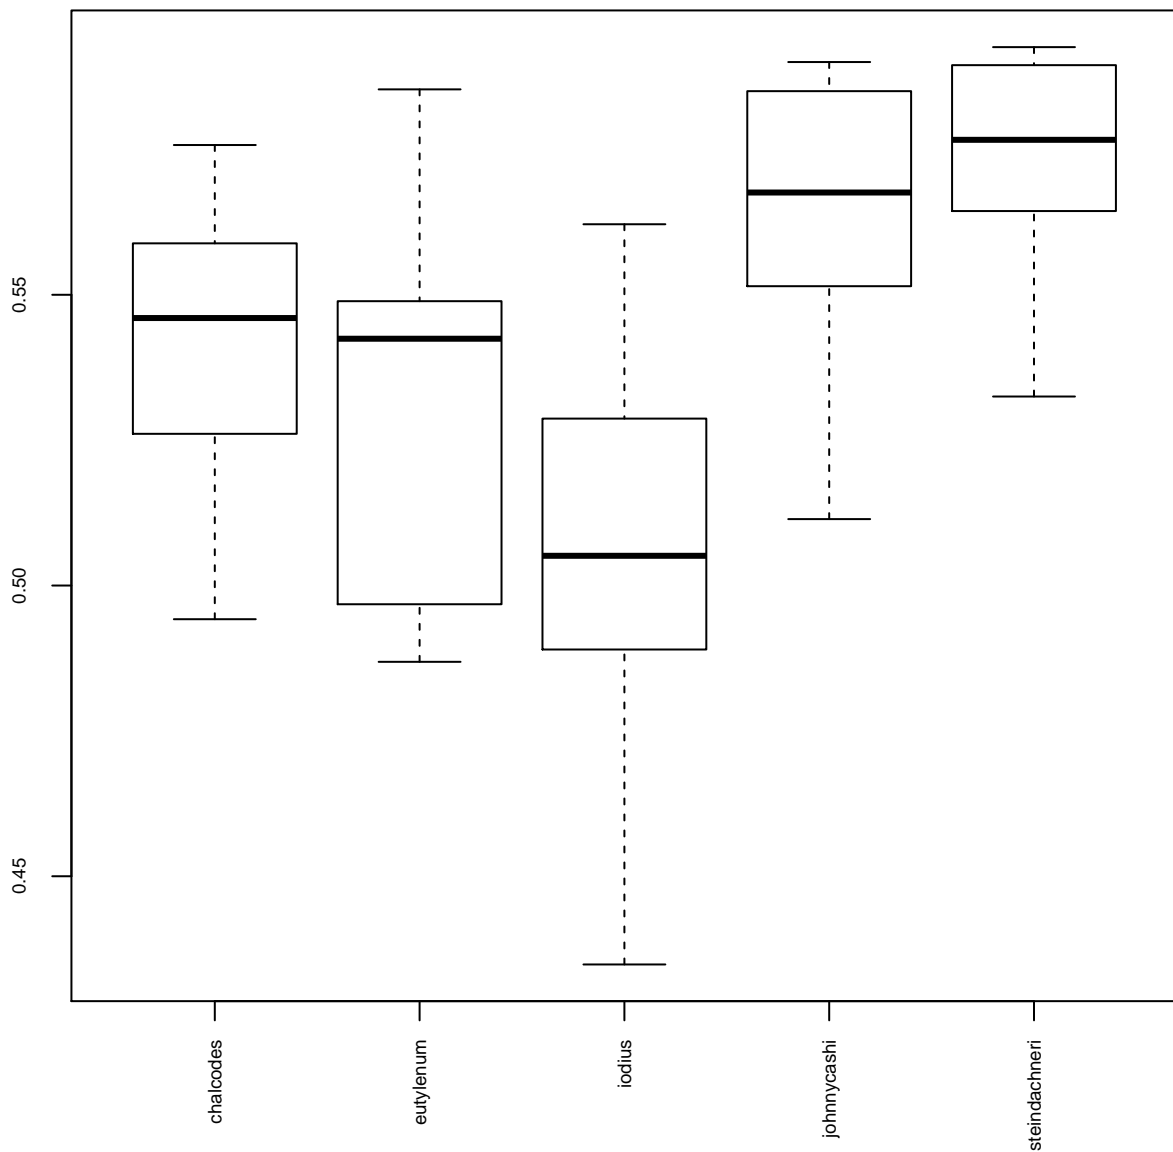

Supplement: Supplementary file 848

# Patella 1/Tibia 1 ratio – males

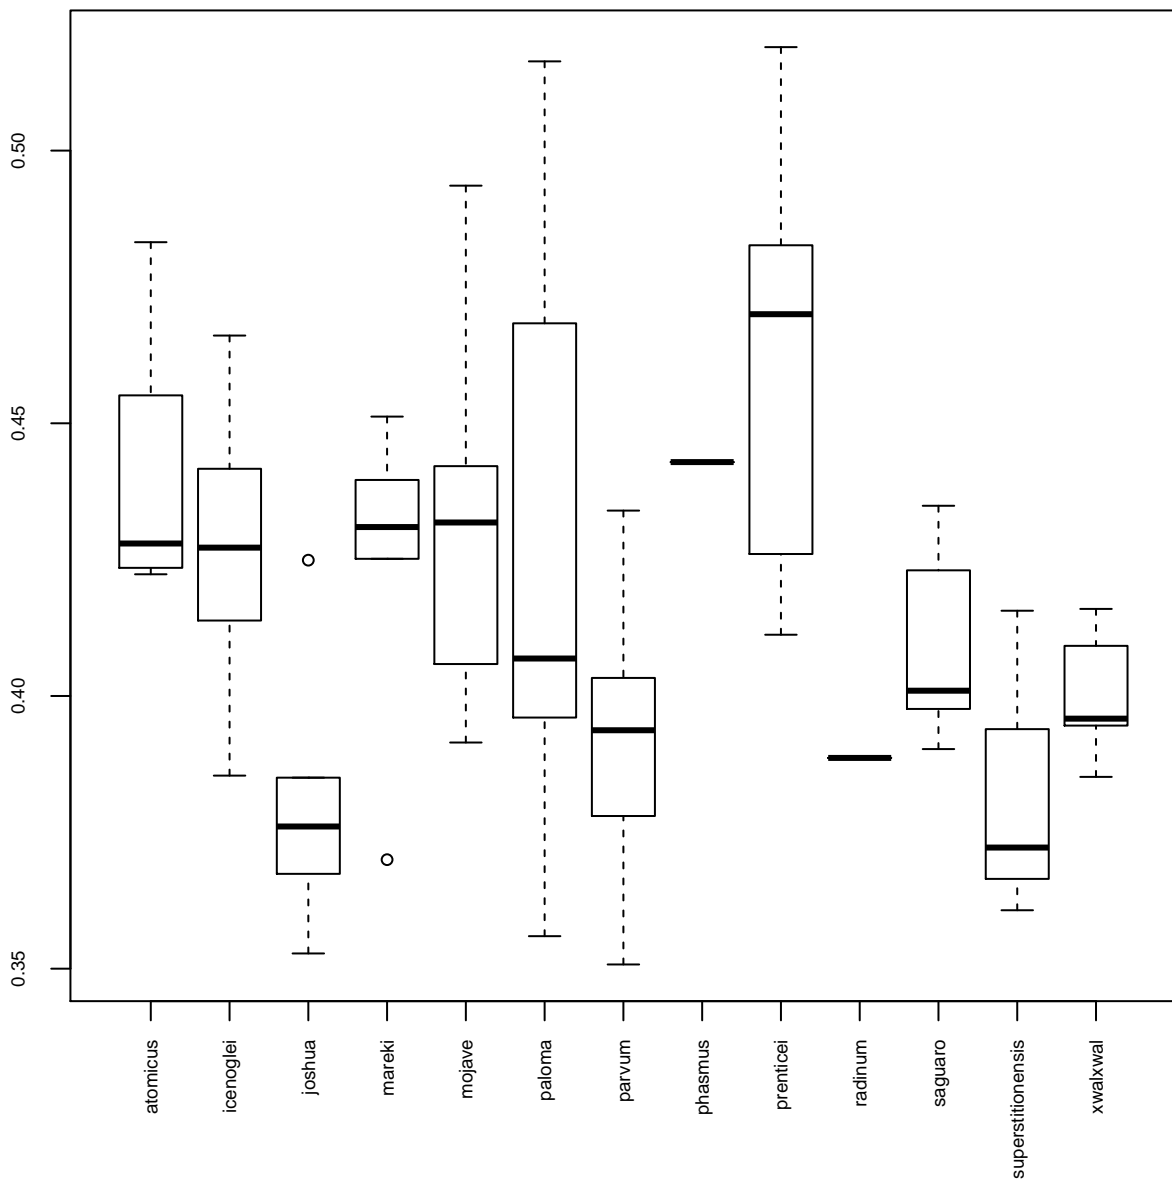

Supplement: Supplementary file 849

## Femur 1/Tarsus 1 ratio – males

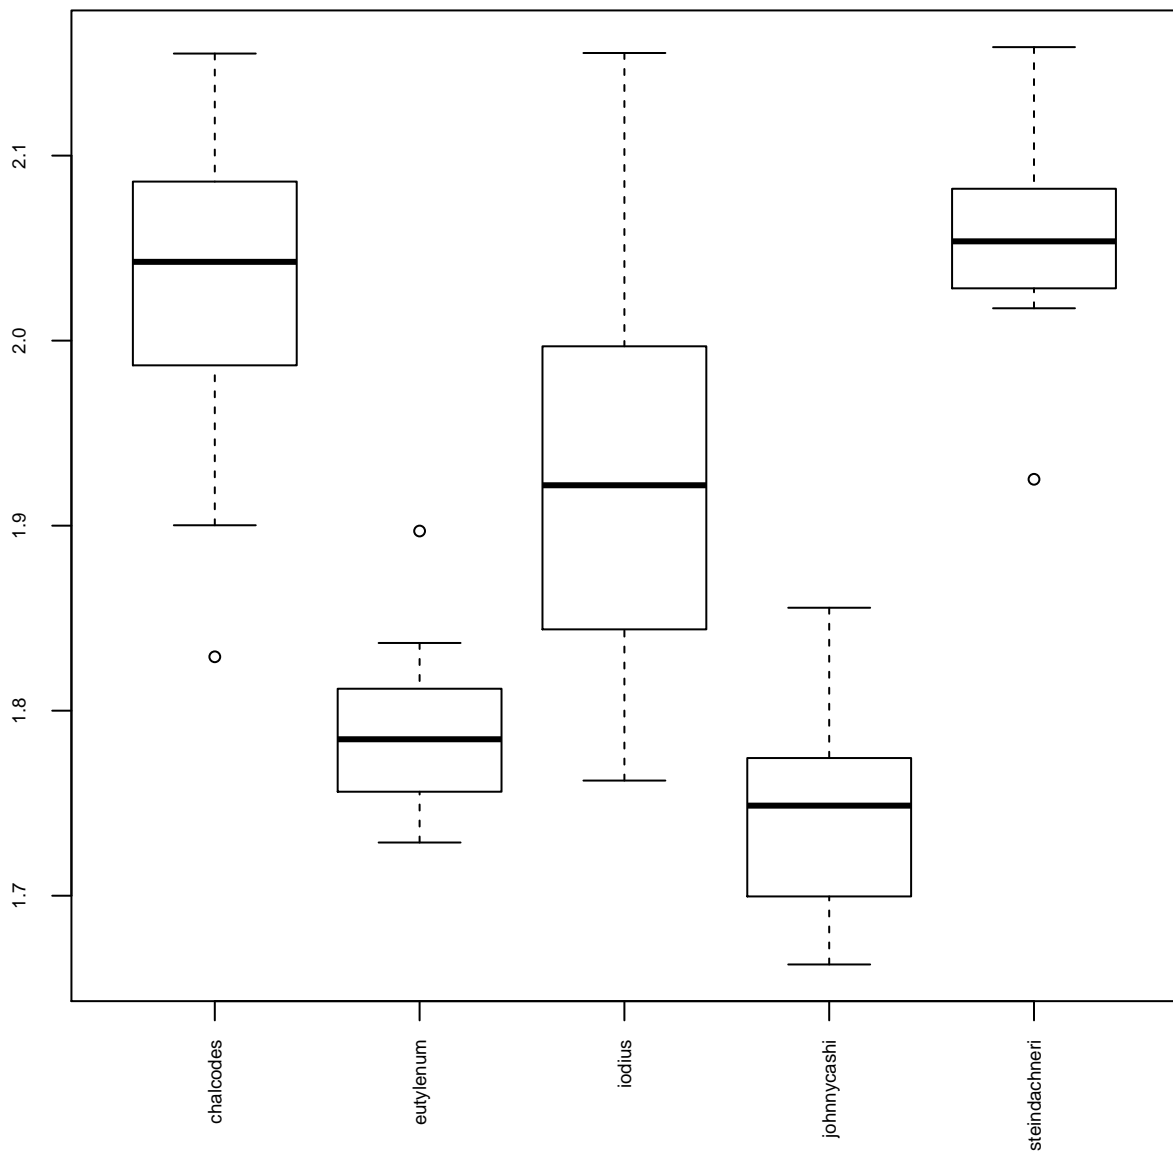

Supplement: Supplementary file 850

## Metatarsus 1/Femur 4 Length ratio – males

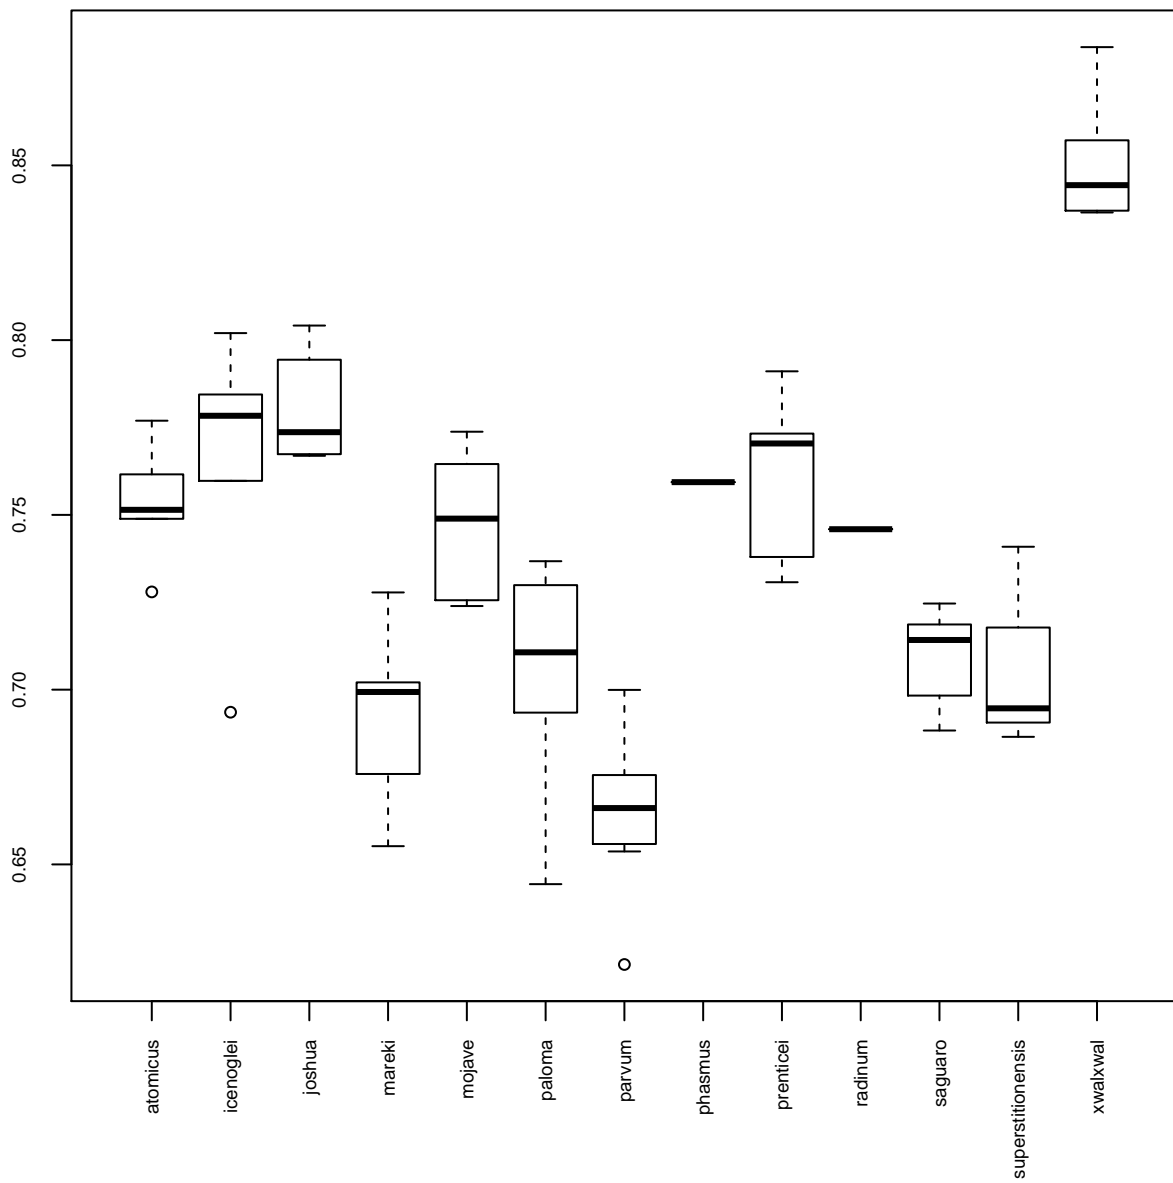

Supplement: Supplementary file 851

## Metatarsus 3/Tarsus 4 Length ratio – males

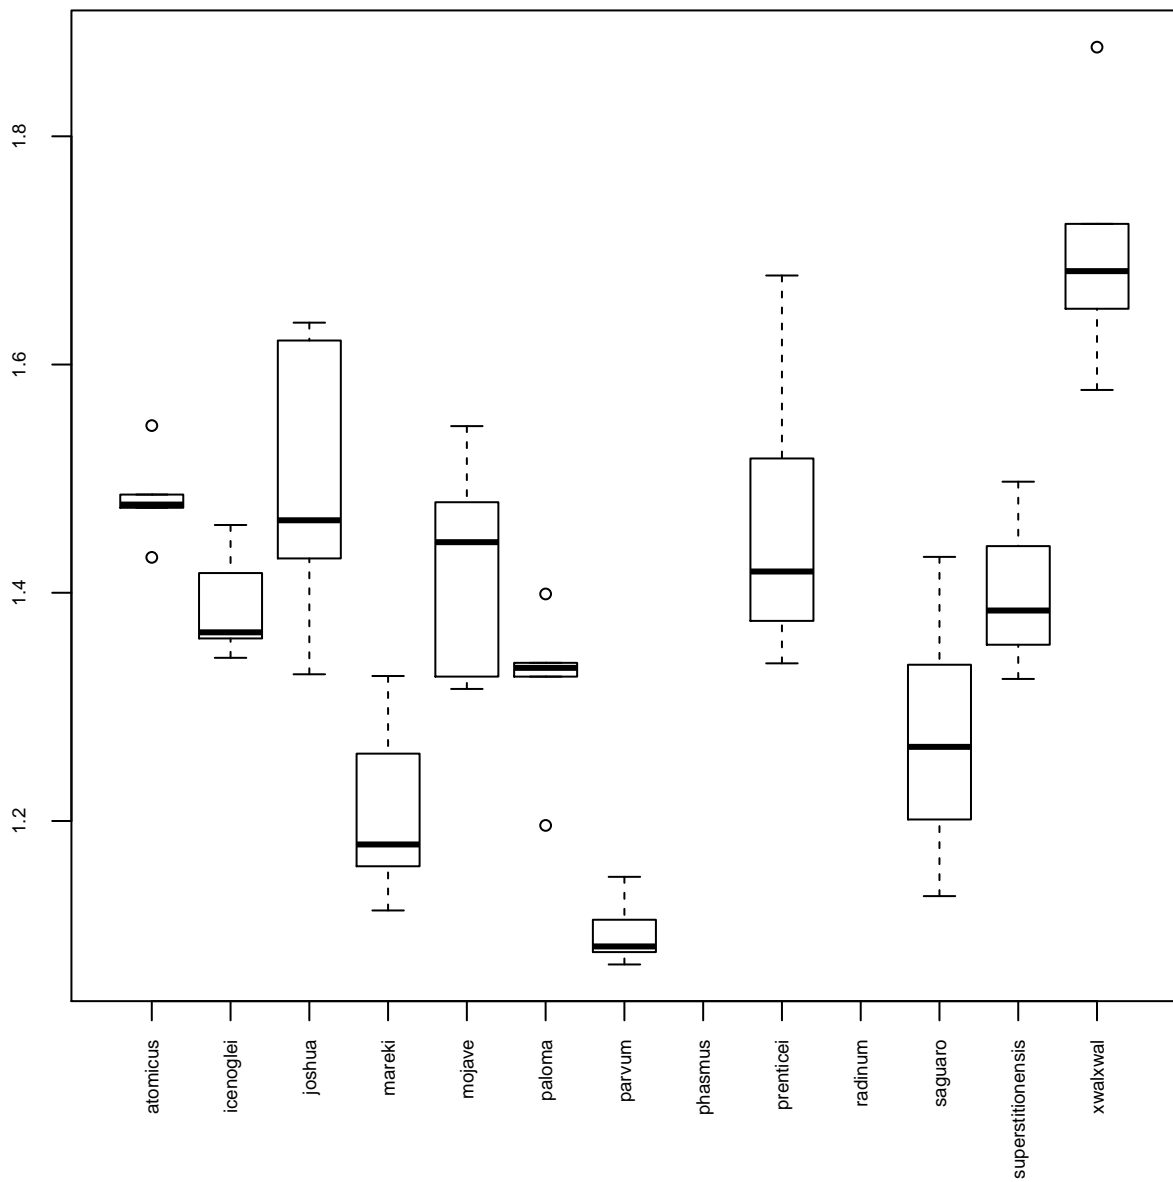

Supplement: Supplementary file 852

# Patella 3/Metatarsus 3 ratio – females

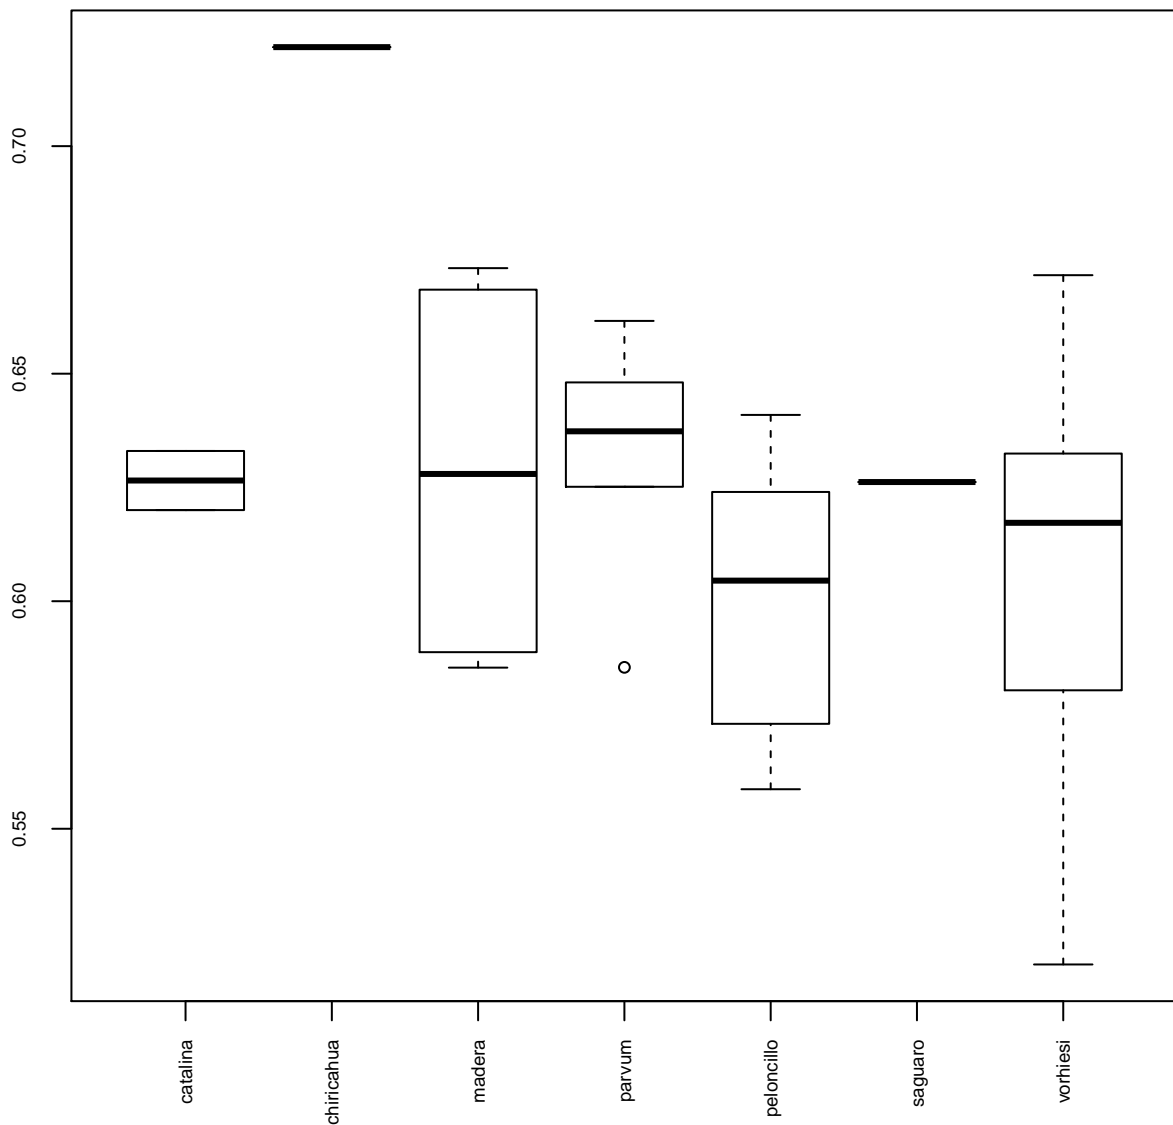

Supplement: Supplementary file 853

## Patella 3/Metatarsus 3 ratio – females

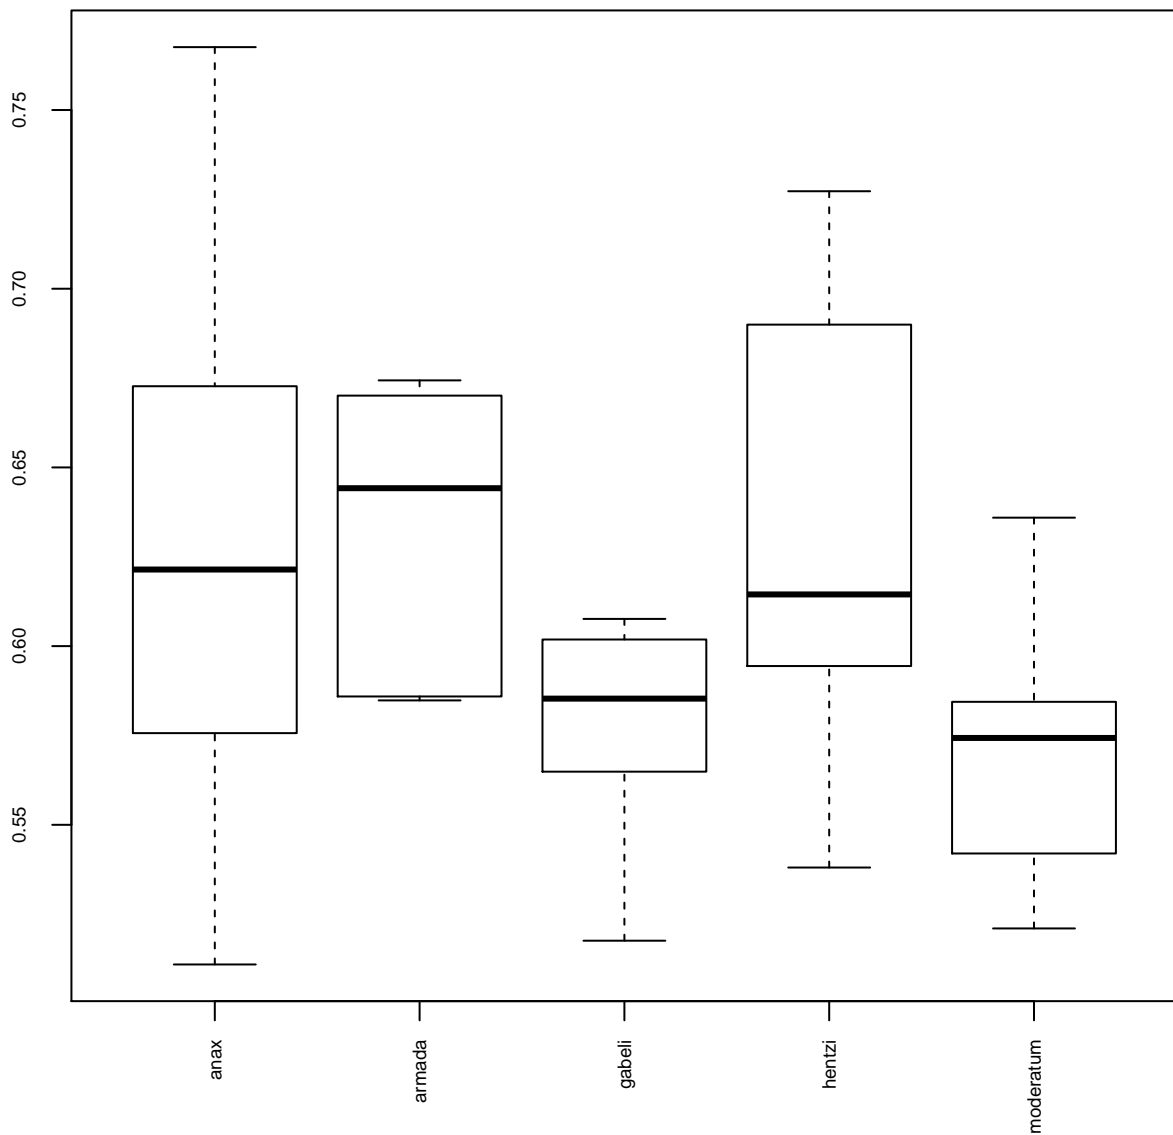

Supplement: Supplementary file 854

## Femur 3/Tarsus 3 ratio – females

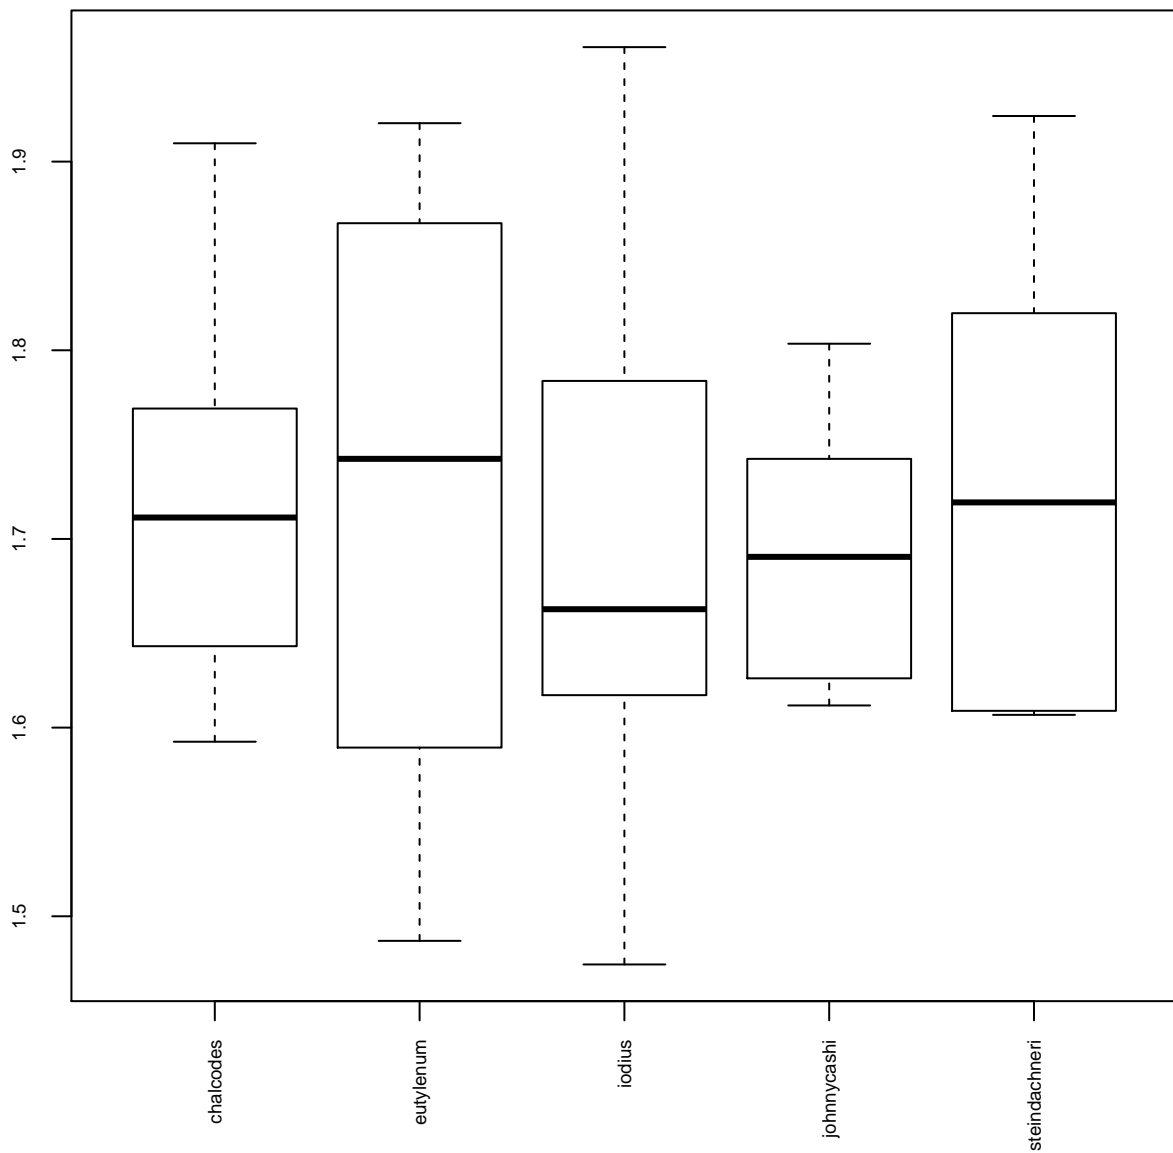

Supplement: Supplementary file 855

## Femur 3 Length/Width ratio – females

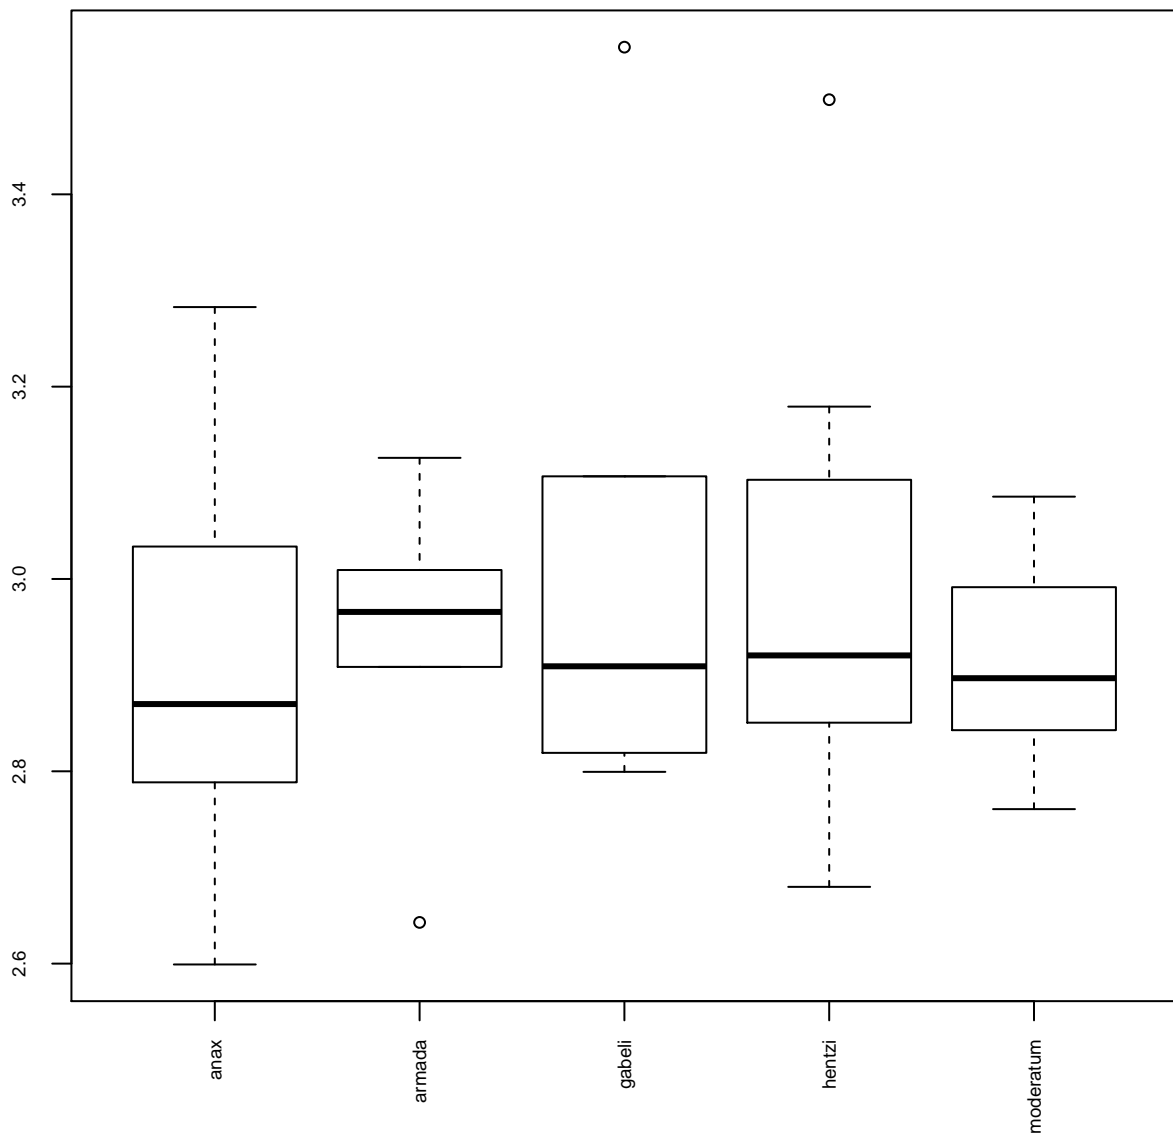

Supplement: Supplementary file 856

## Patella 3/Tarsus 4 Length ratio – females

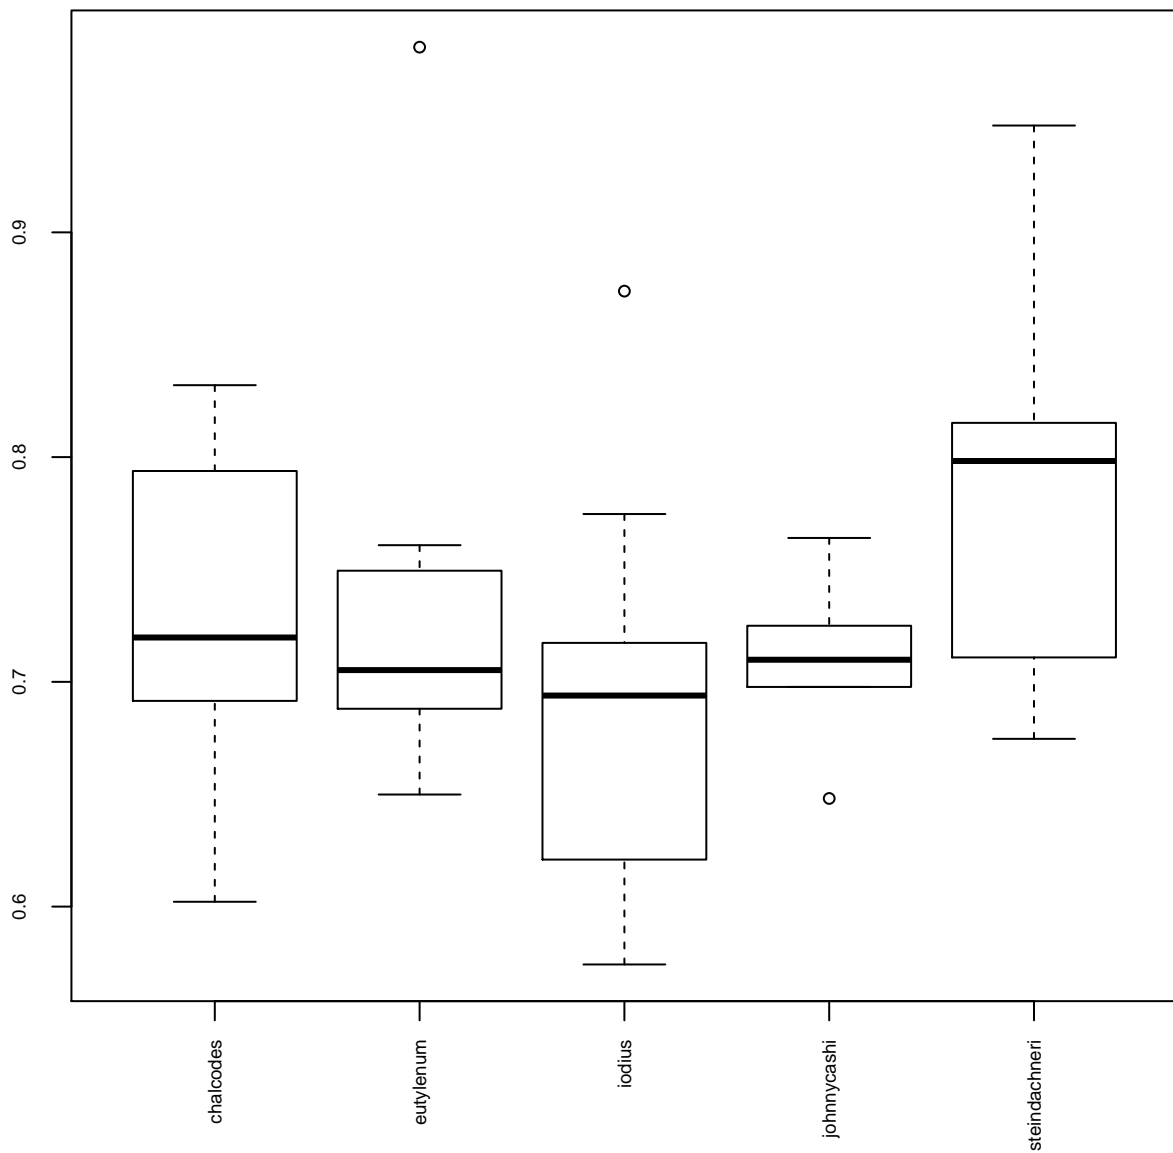

Supplement: Supplementary file 857

## Tibia 1/Tarsus 1 ratio – females

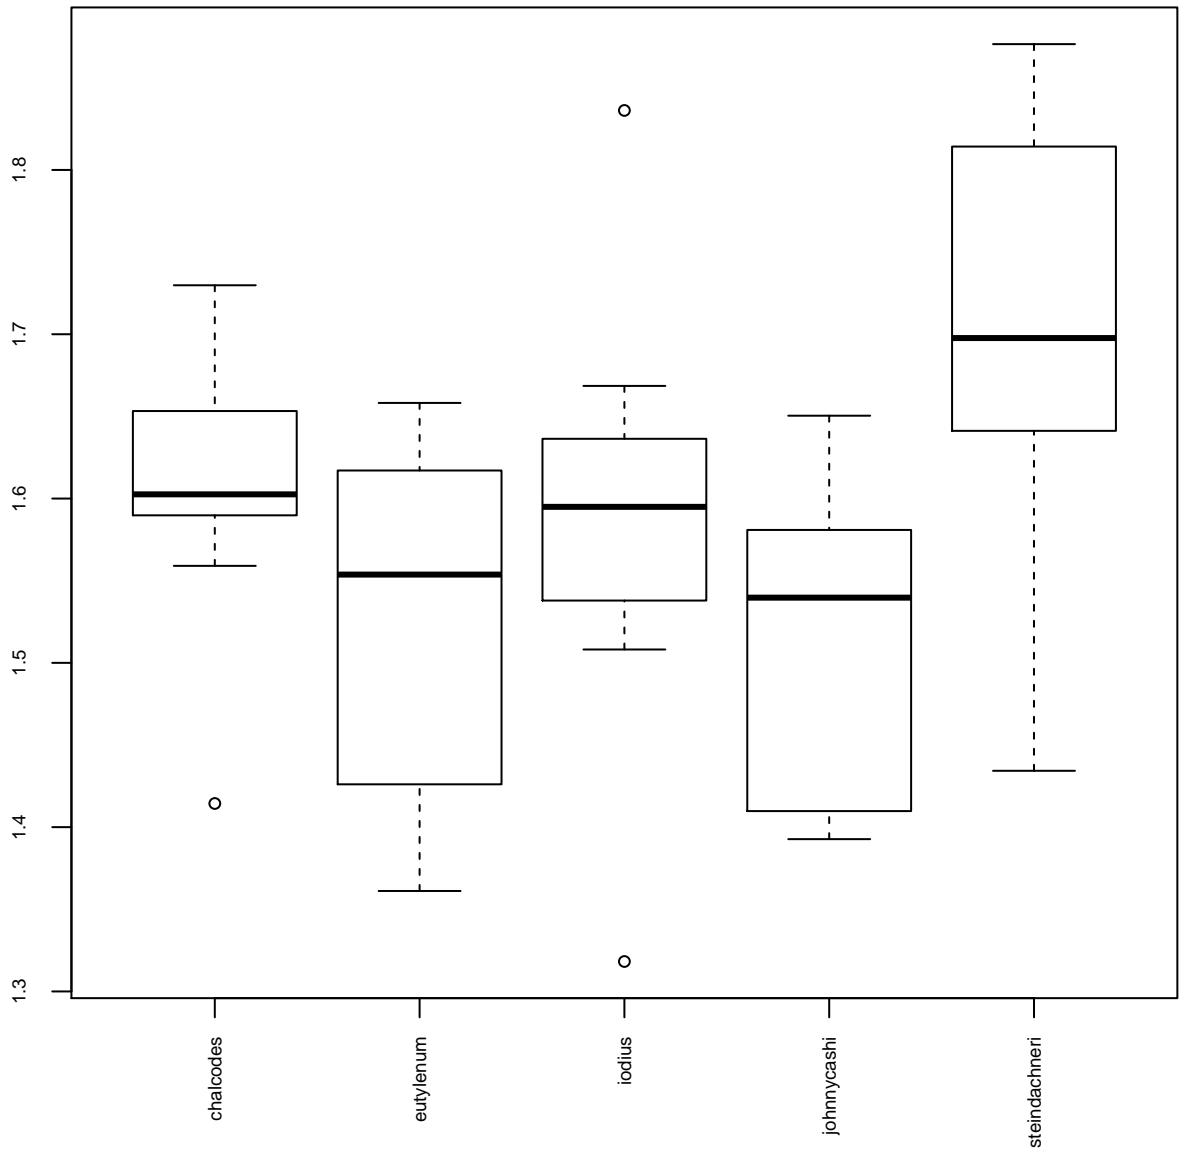

Supplement: Supplementary file 858

# Tibia 1/Metatarsus 1 ratio – females

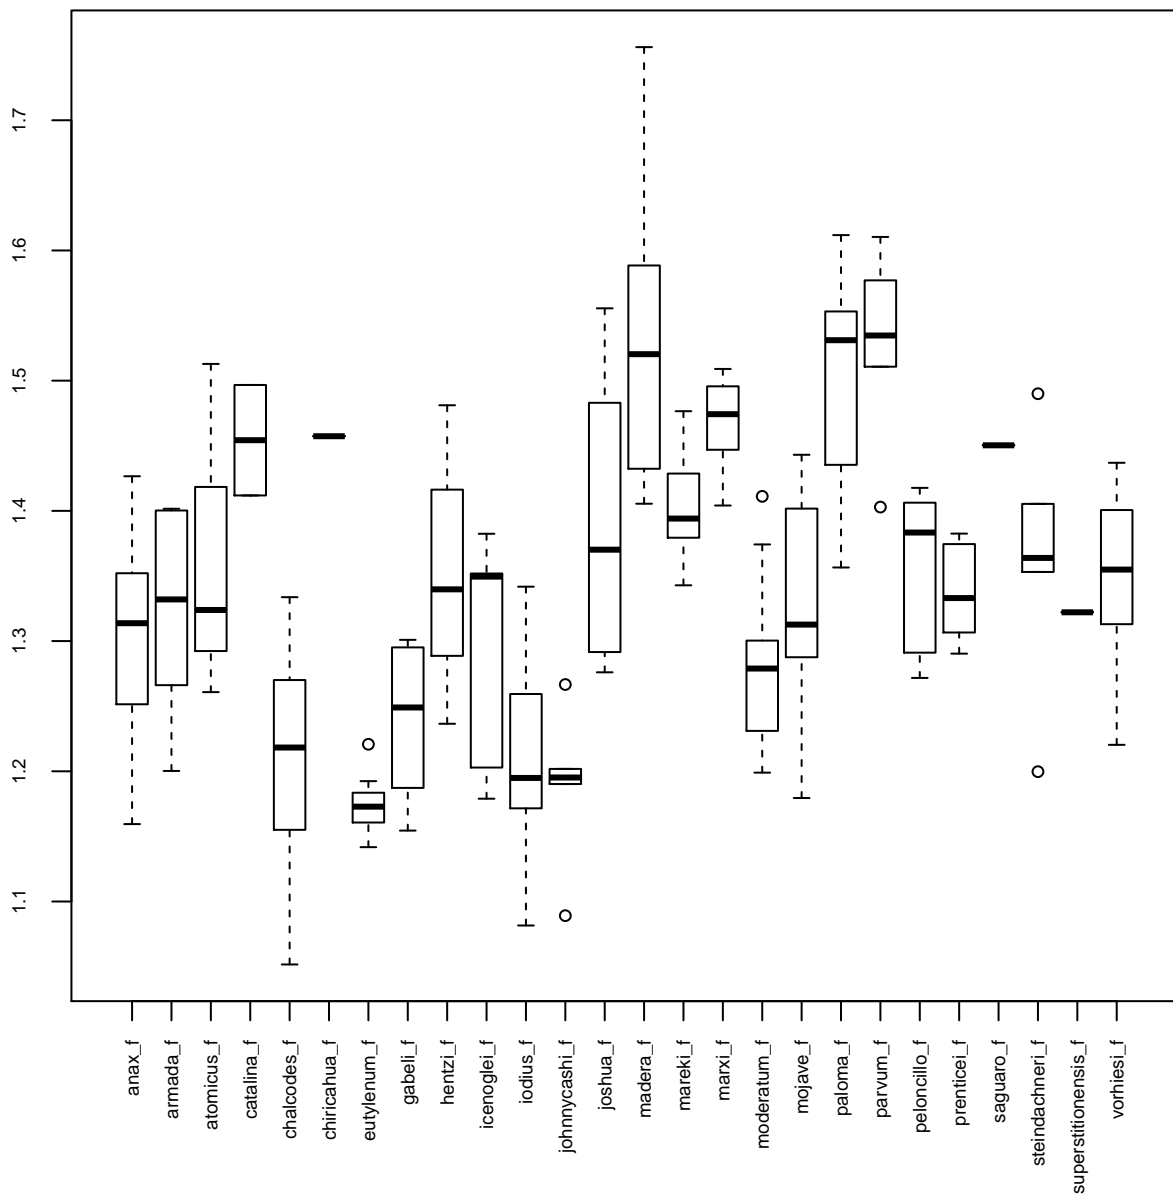

Supplement: Supplementary file 859

## Femur 4/Tarsus 4 ratio – males

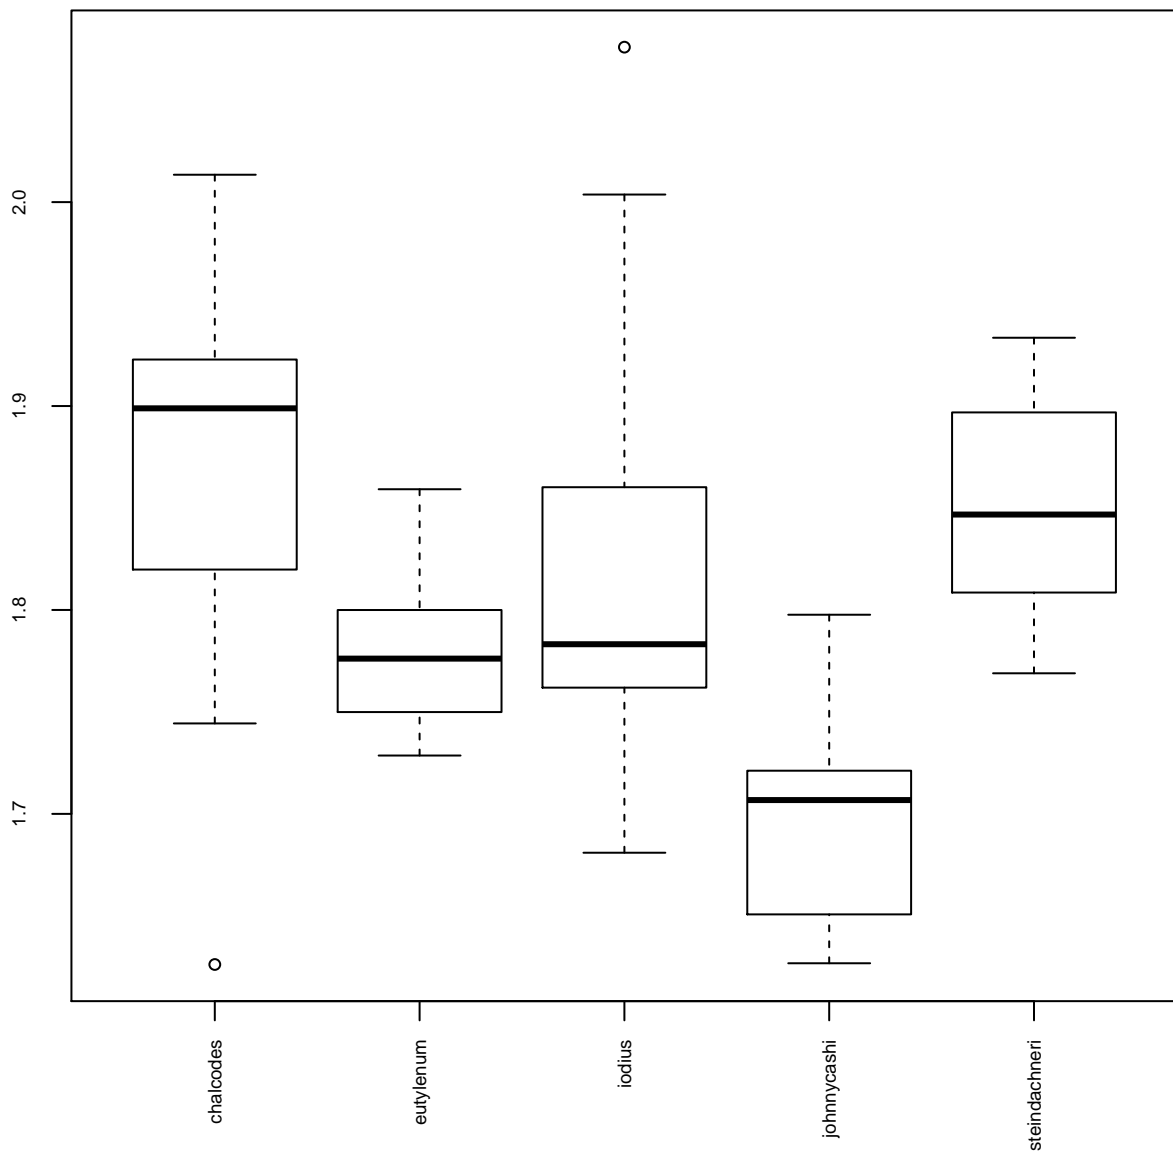

Supplement: Supplementary file 860

## Femur 3/Tibia 3 ratio – males

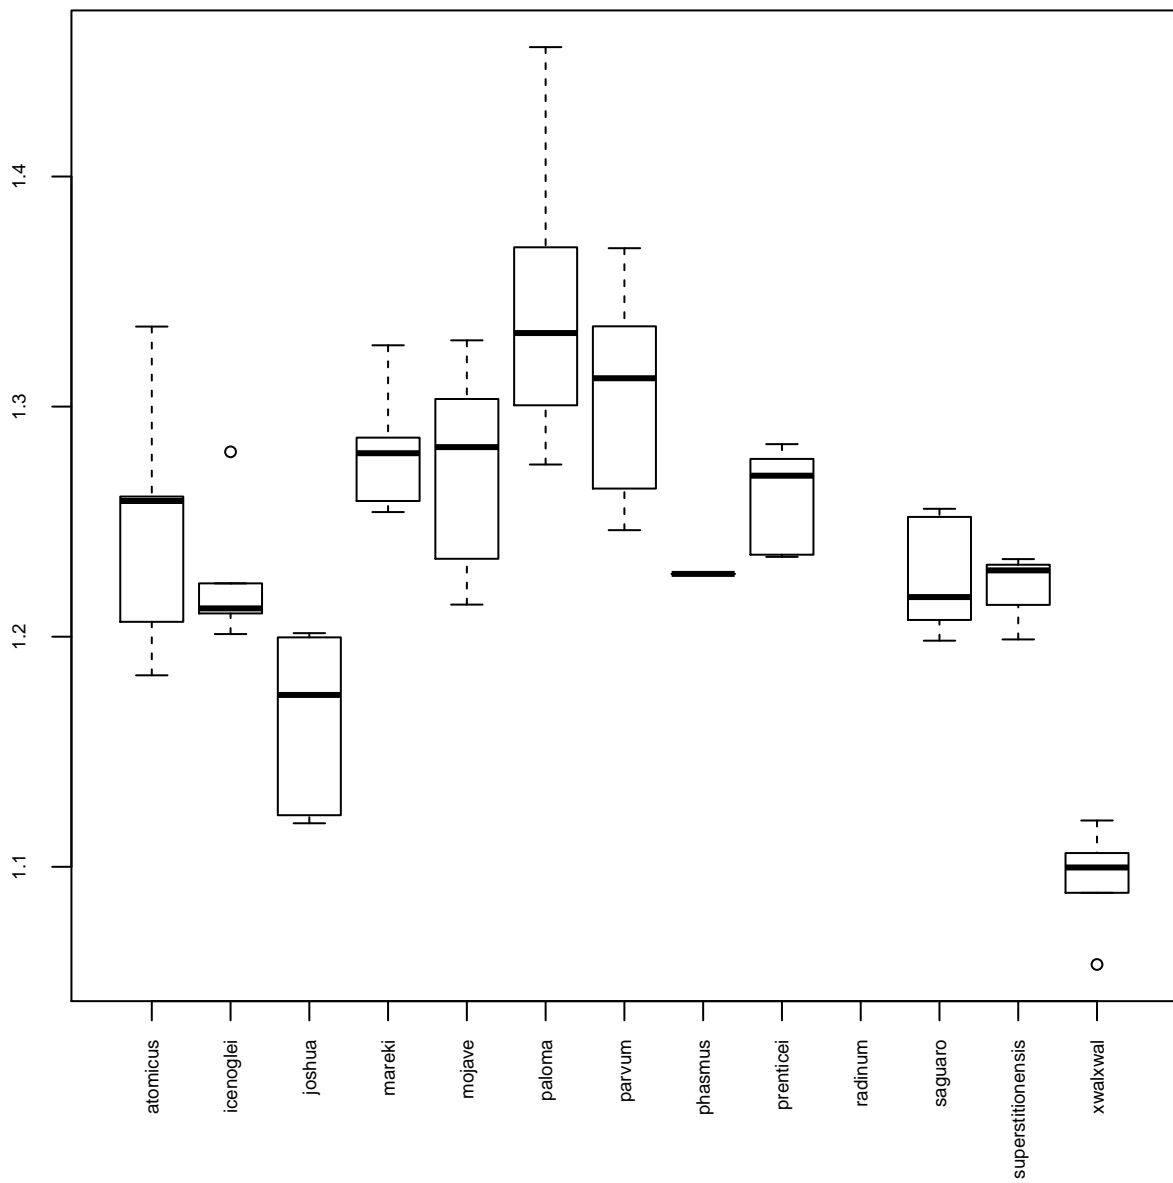

Supplement: Supplementary file 861

# Patella 1/Femur 3 Length ratio – females

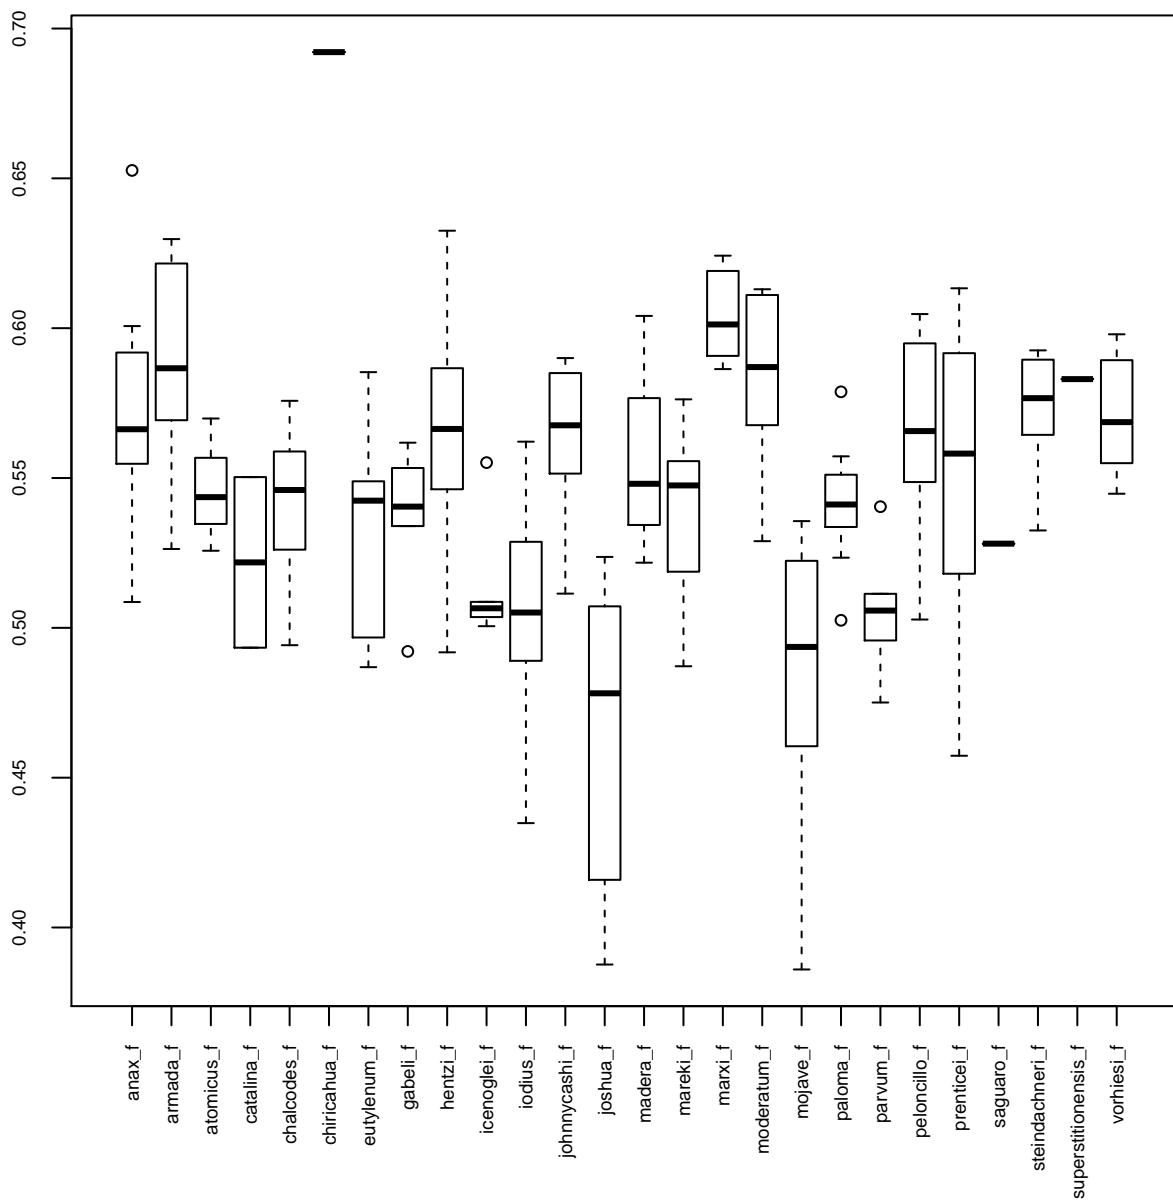

Supplement: Supplementary file 862

## Leg 3 Scopulation ratio – females

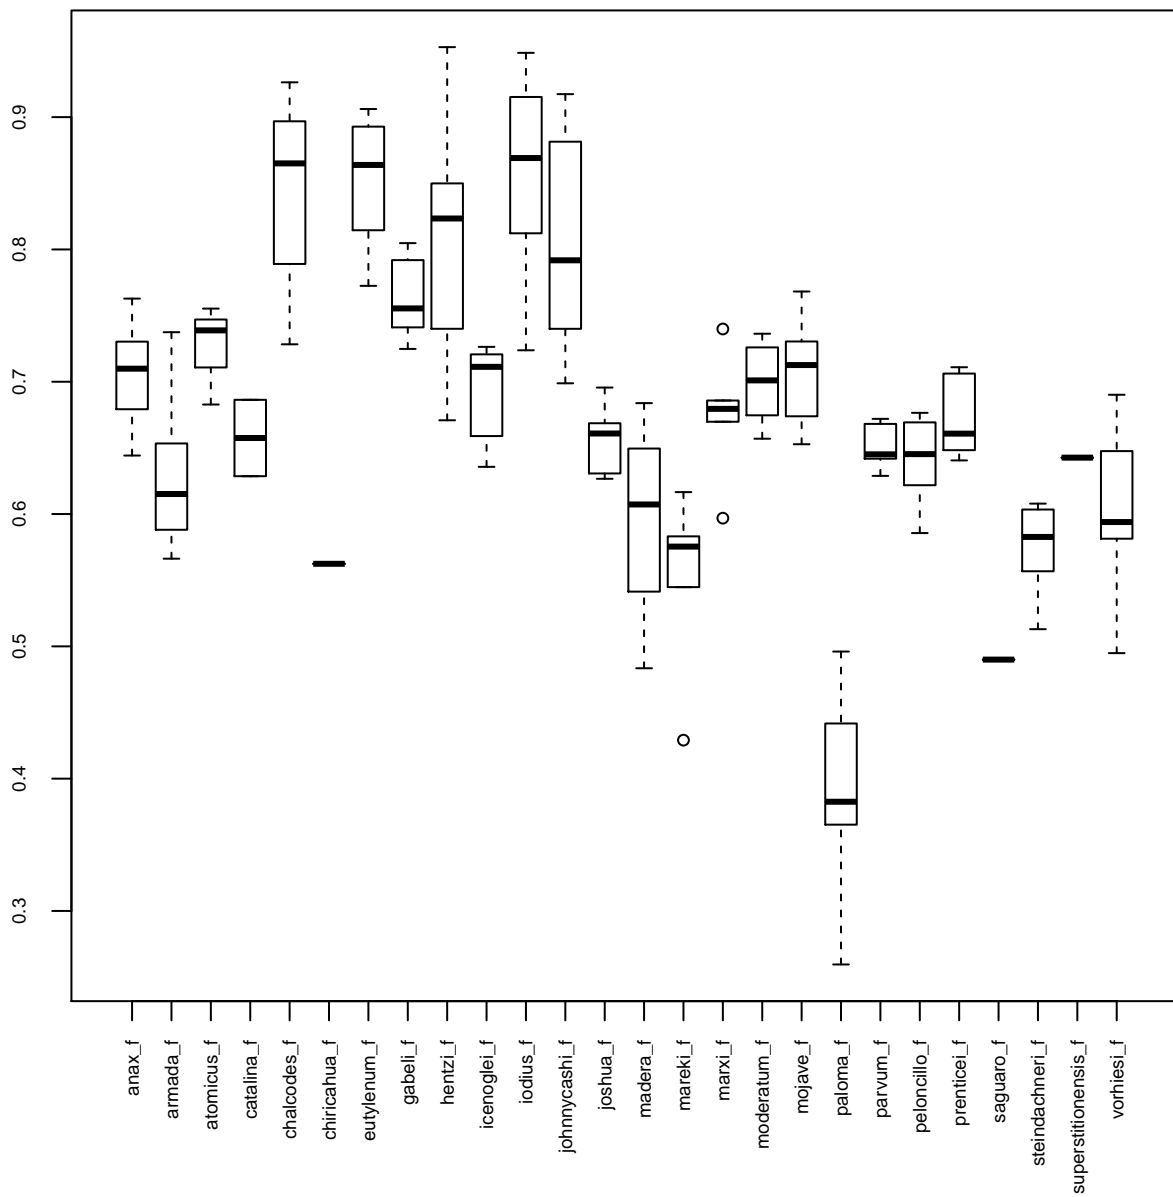

Supplement: Supplementary file 863

# Metatarsus 1/Metatarsus 3 ratio – males

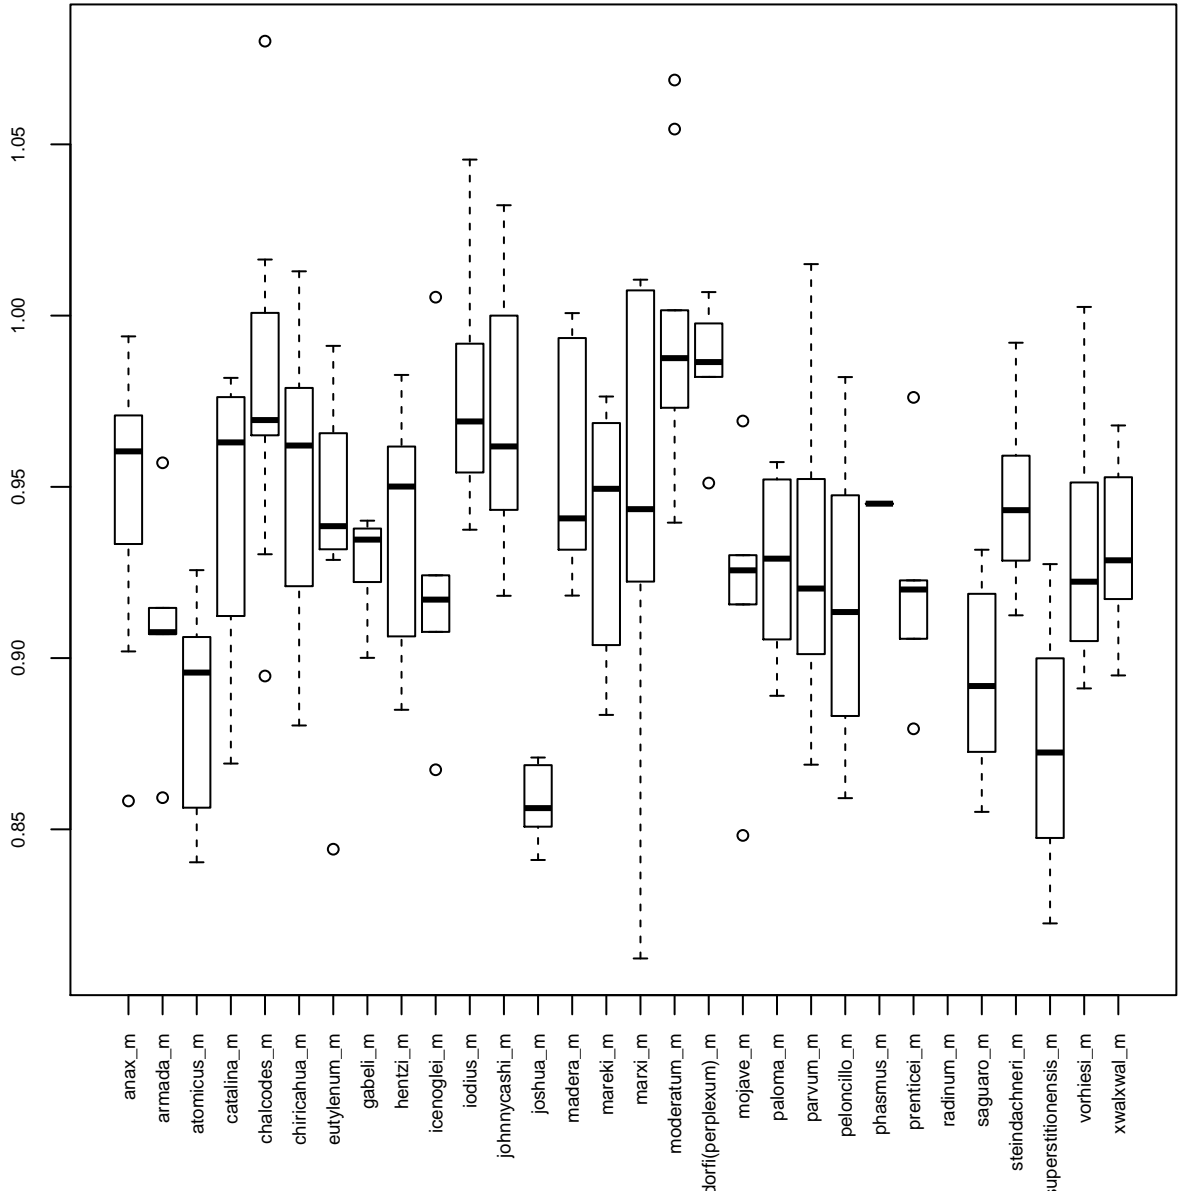

Supplement: Supplementary file 864

## Patella 1/Patella 3 ratio – females

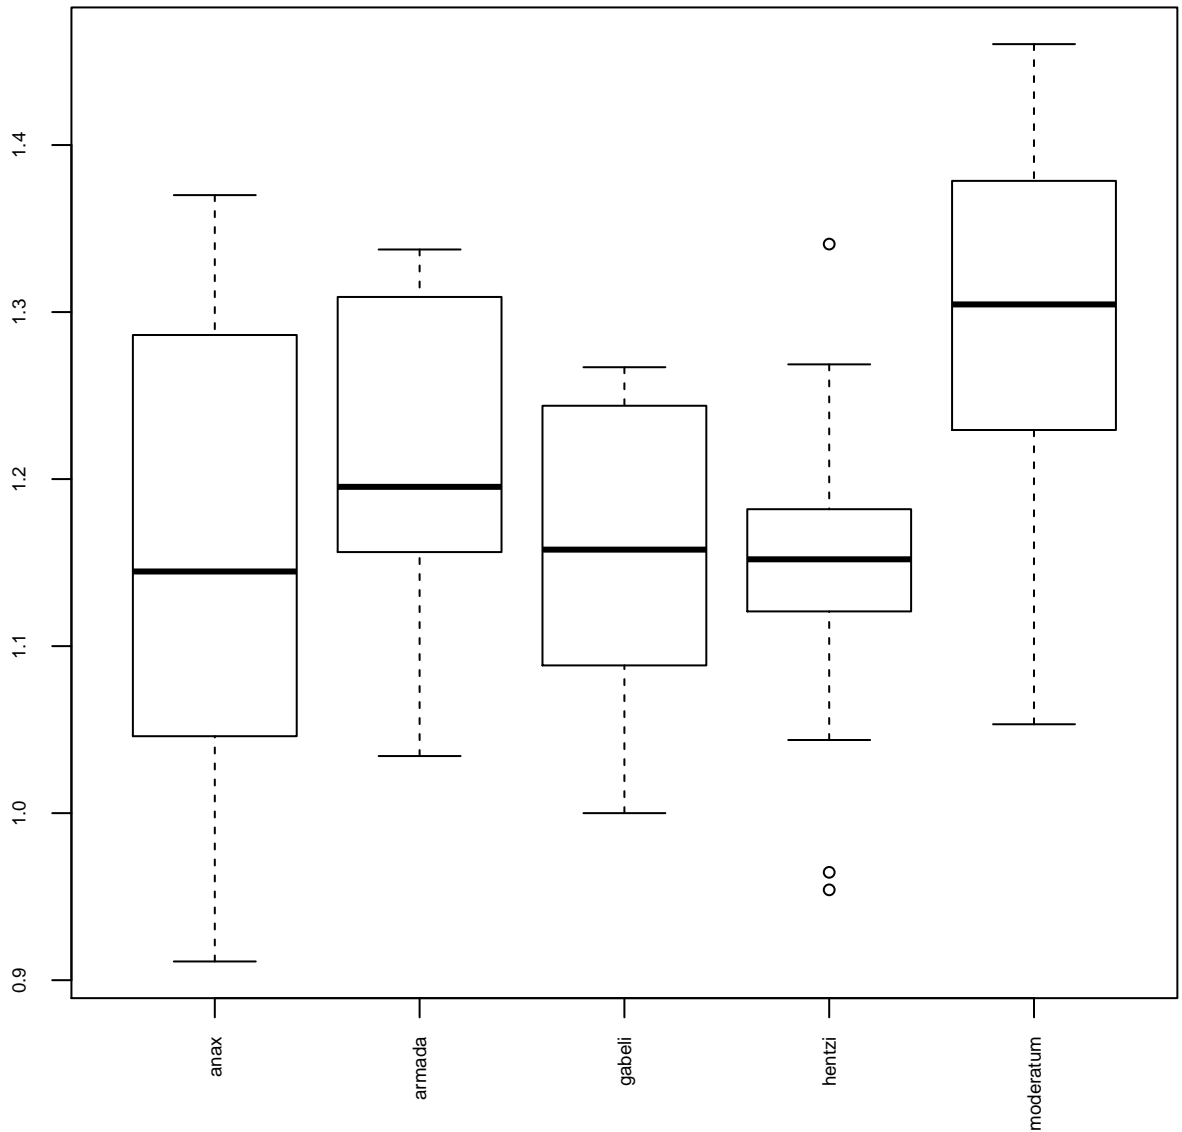

Supplement: Supplementary file 865

## Palpal Tibia/Tarsus 1 Length ratio – males

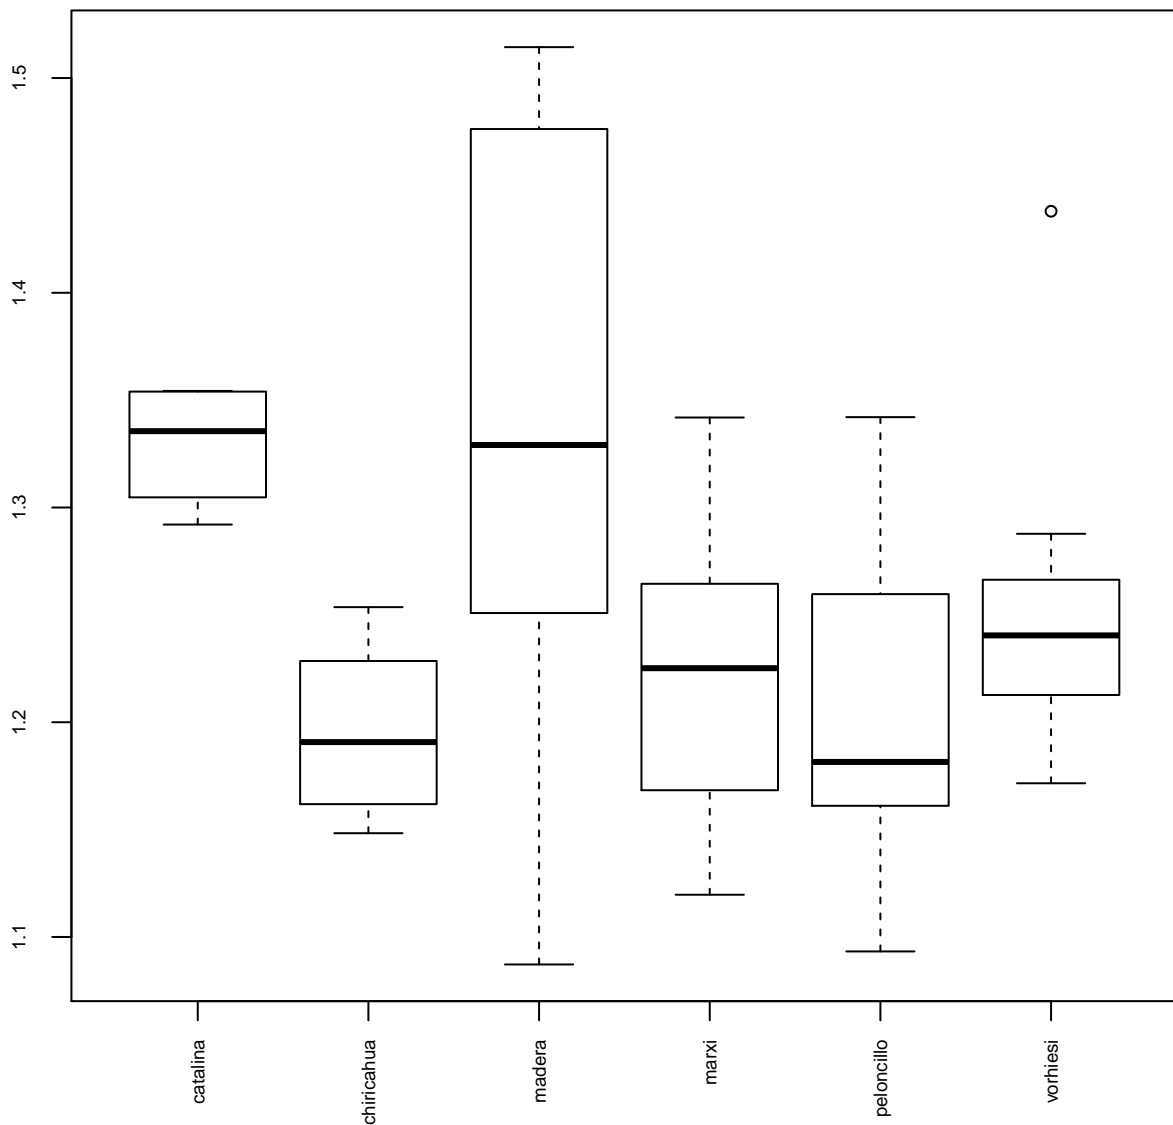

Supplement: Supplementary file 866

# Femur 4/Patella 4 ratio – males

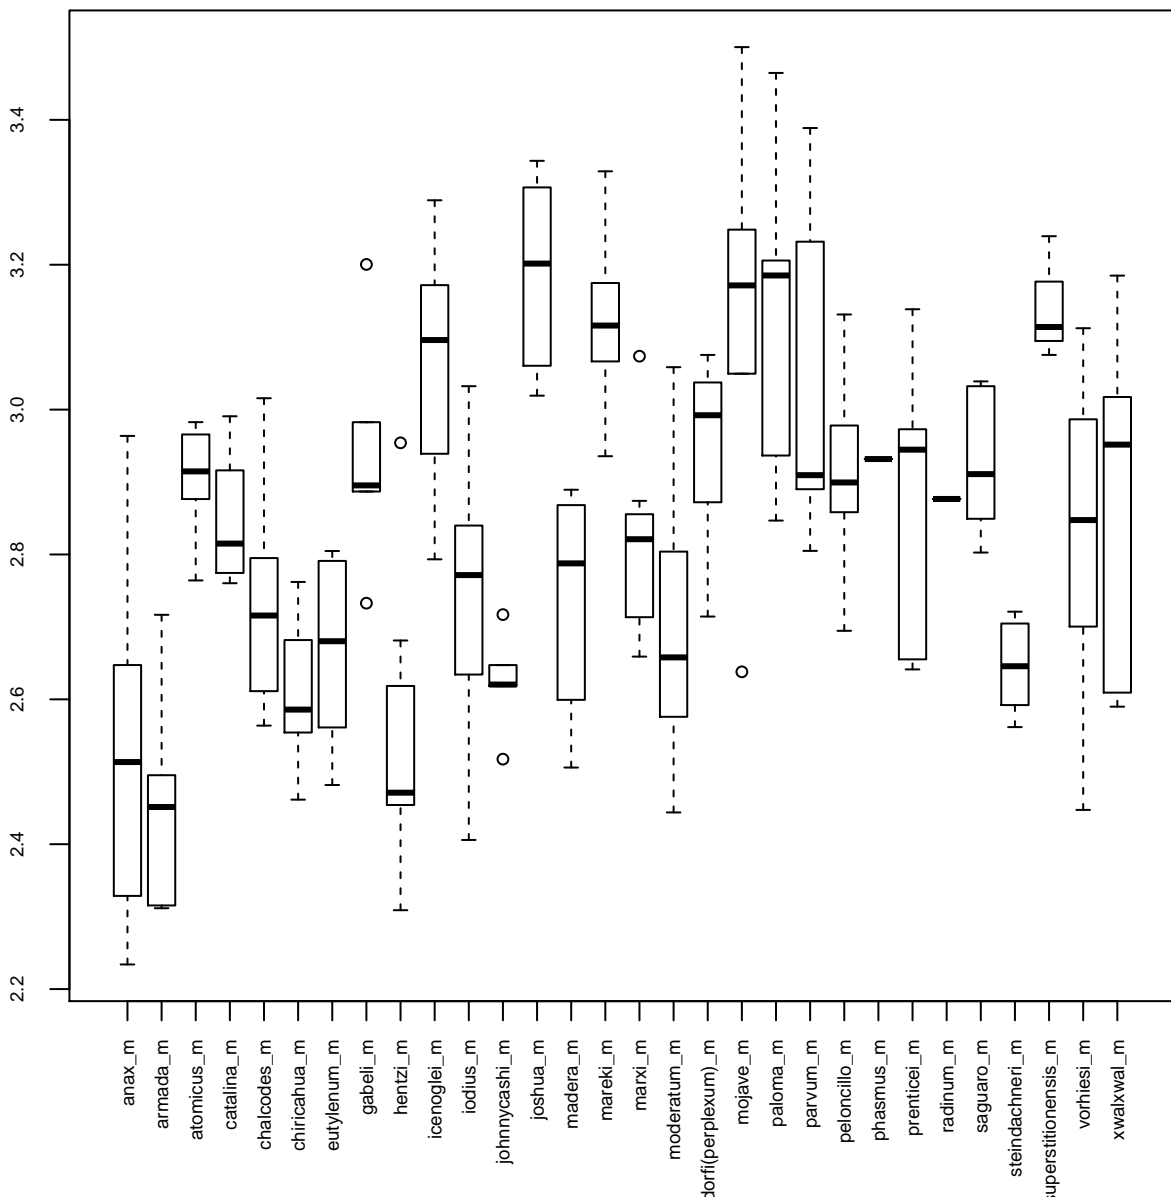

Supplement: Supplementary file 867

## Patella 1/Tarsus 4 Length ratio – males

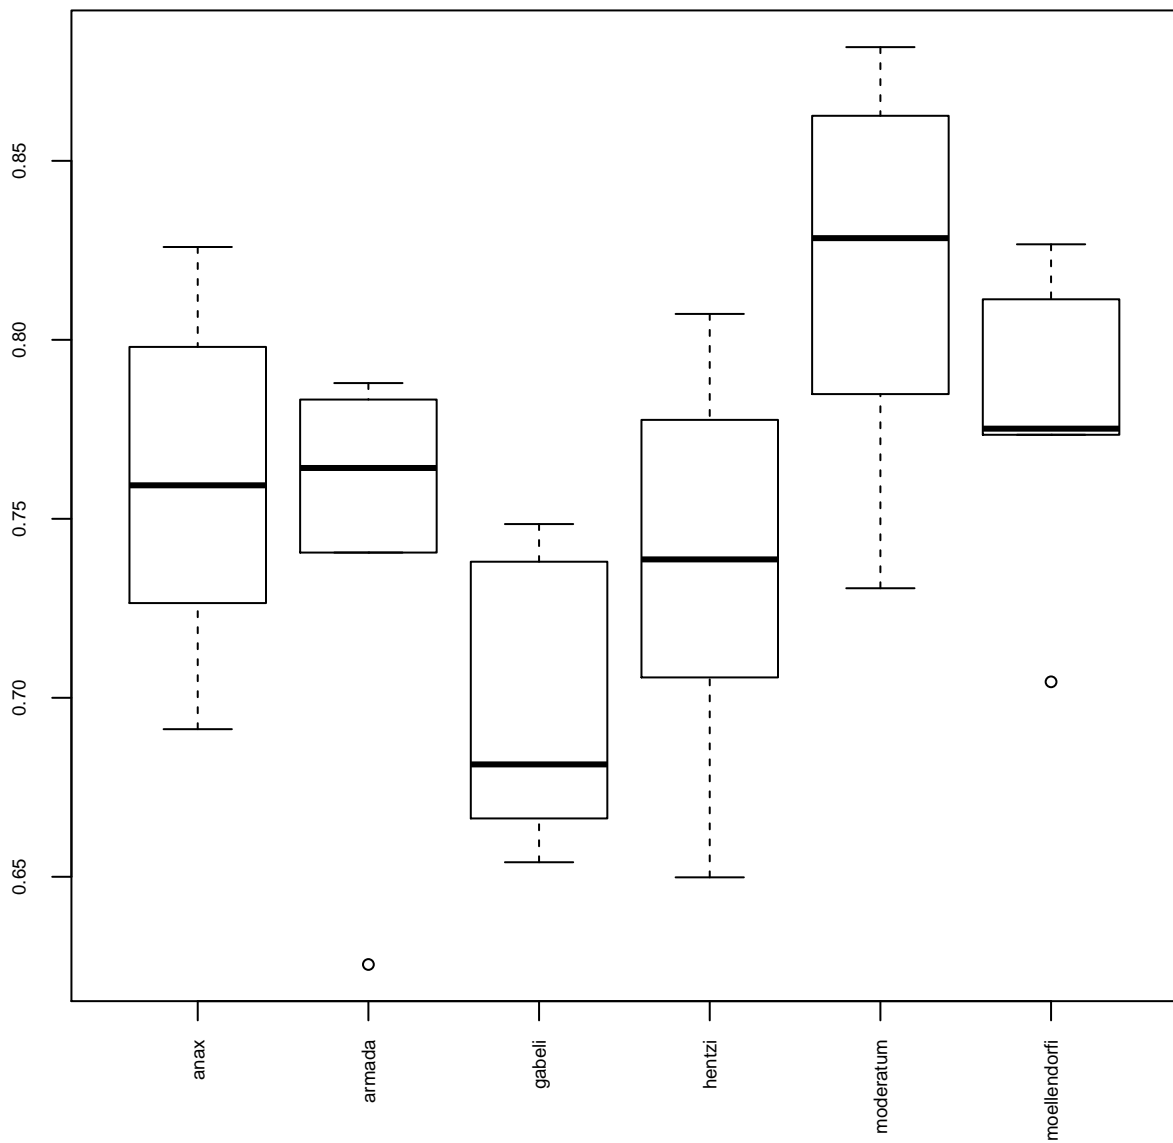

Supplement: Supplementary file 868

## Carapace Length/Tibia 4 ratio – females

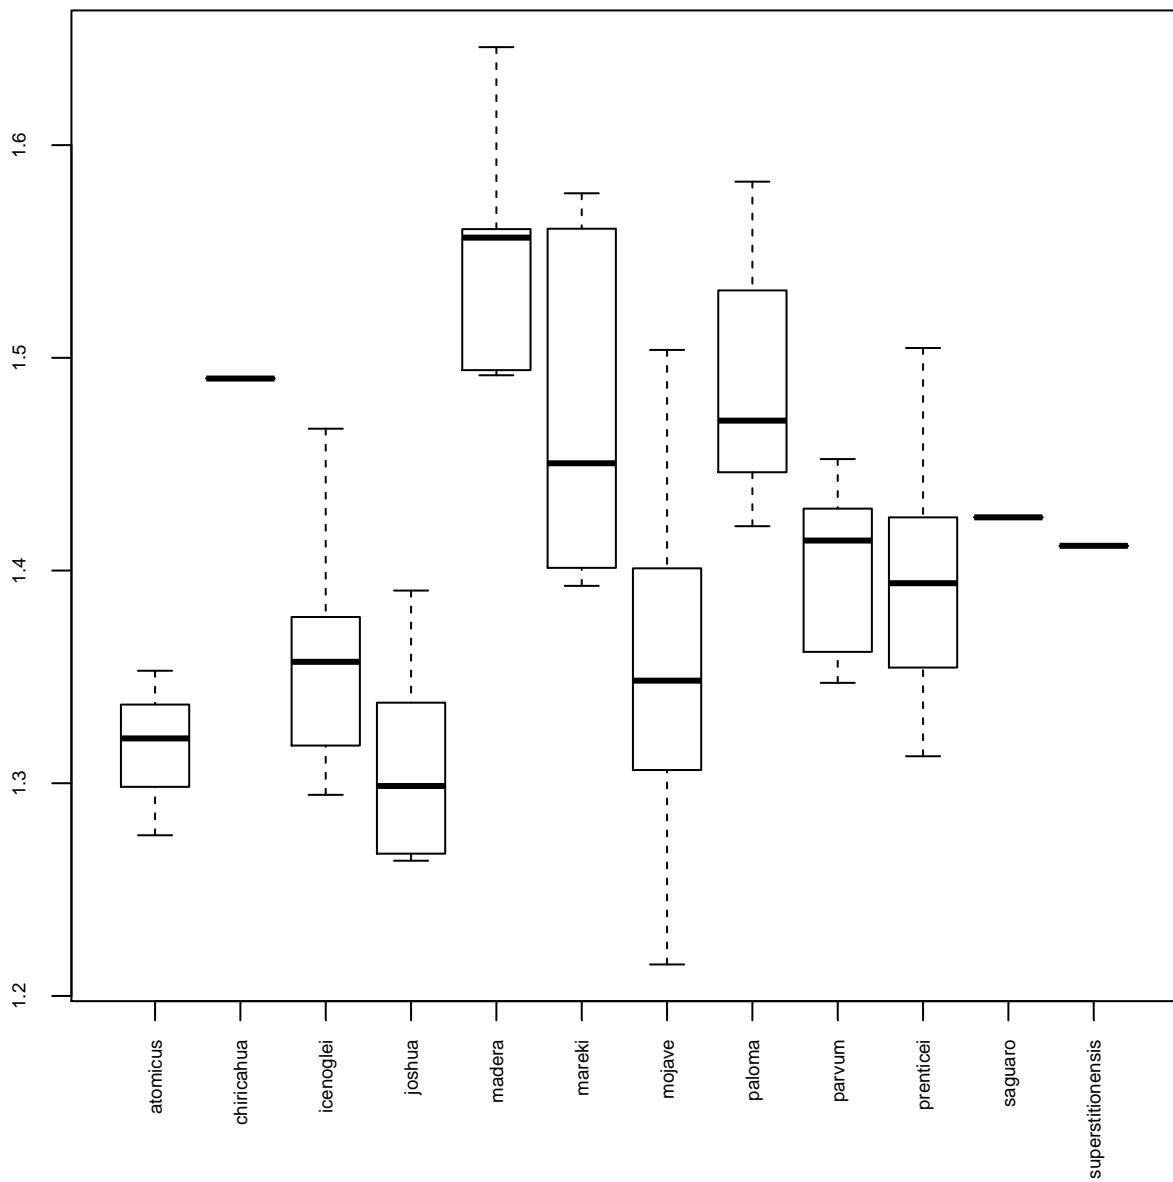

Supplement: Supplementary file 869

## Femur 1/Tibia 3 ratio – females

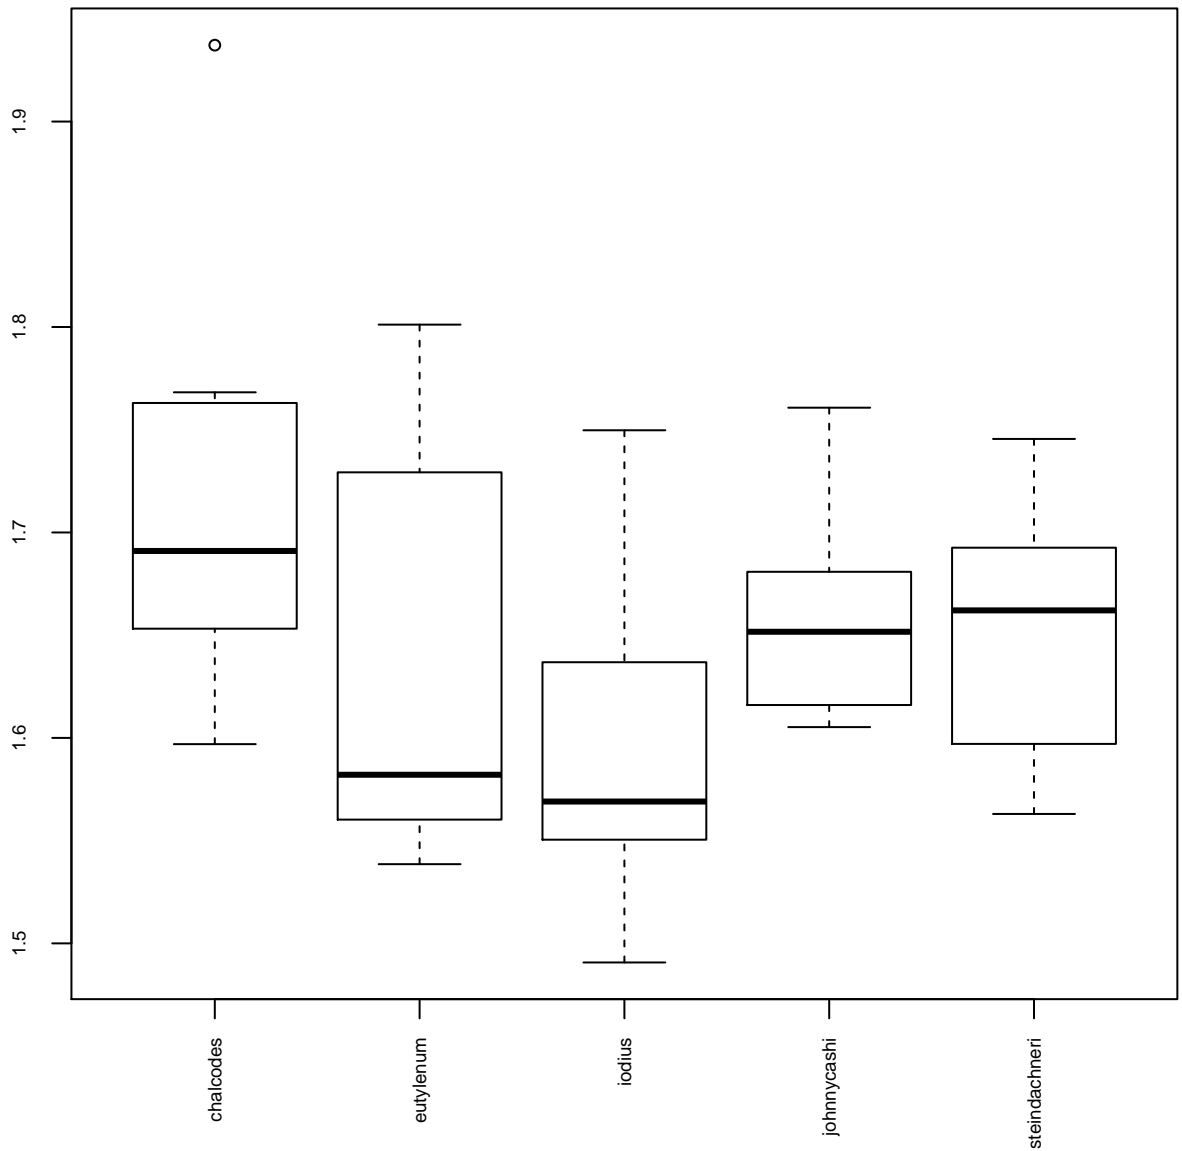

Supplement: Supplementary file 870

## Femur 3/Tarsus 3 ratio – females

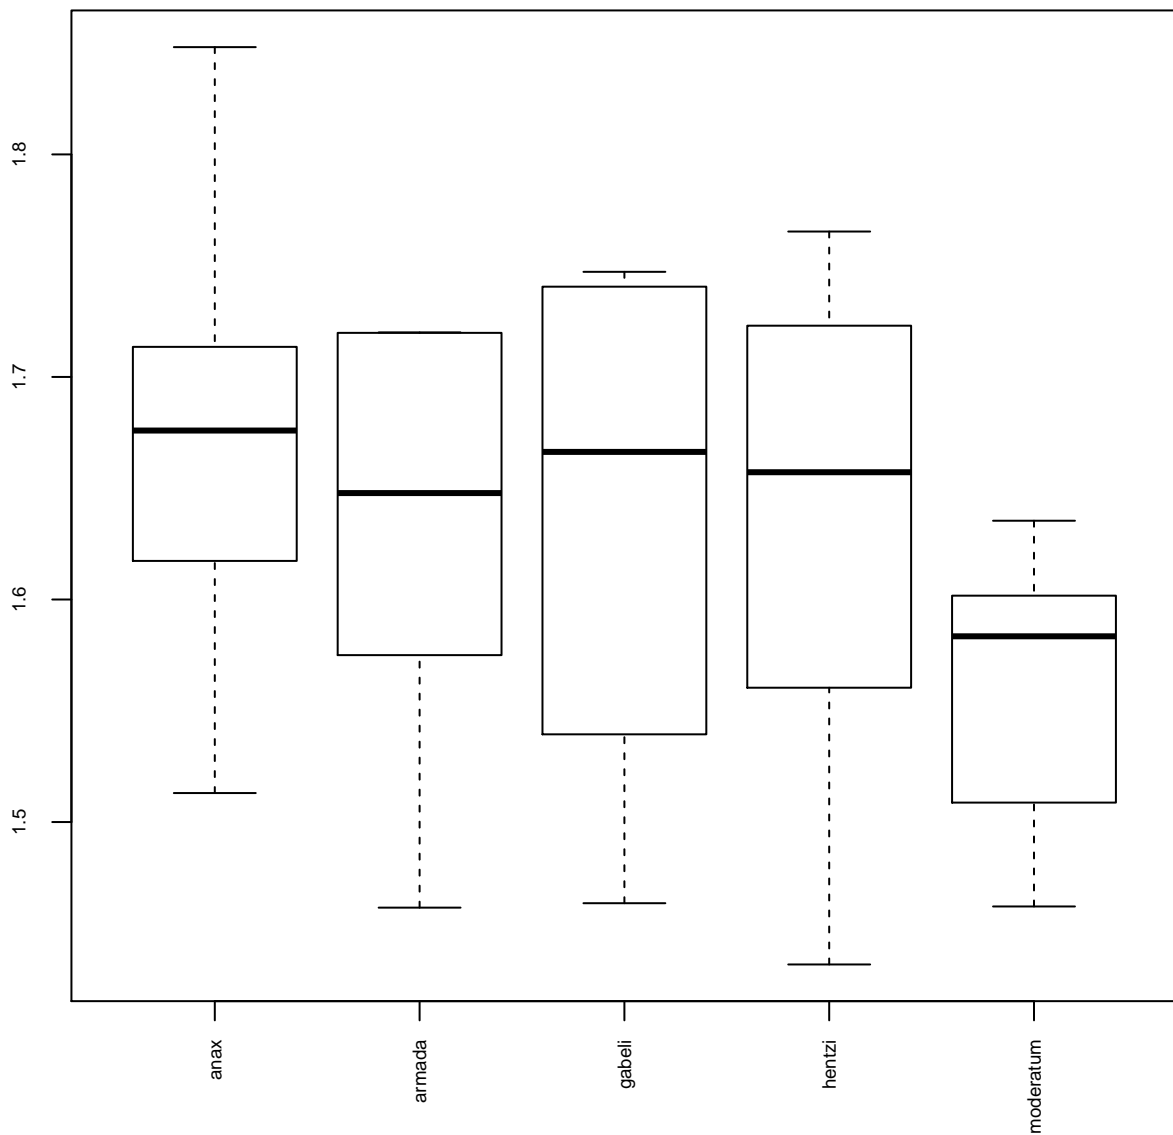

Supplement: Supplementary file 871

Metatarsus 1/Femur 4 Length ratio – females

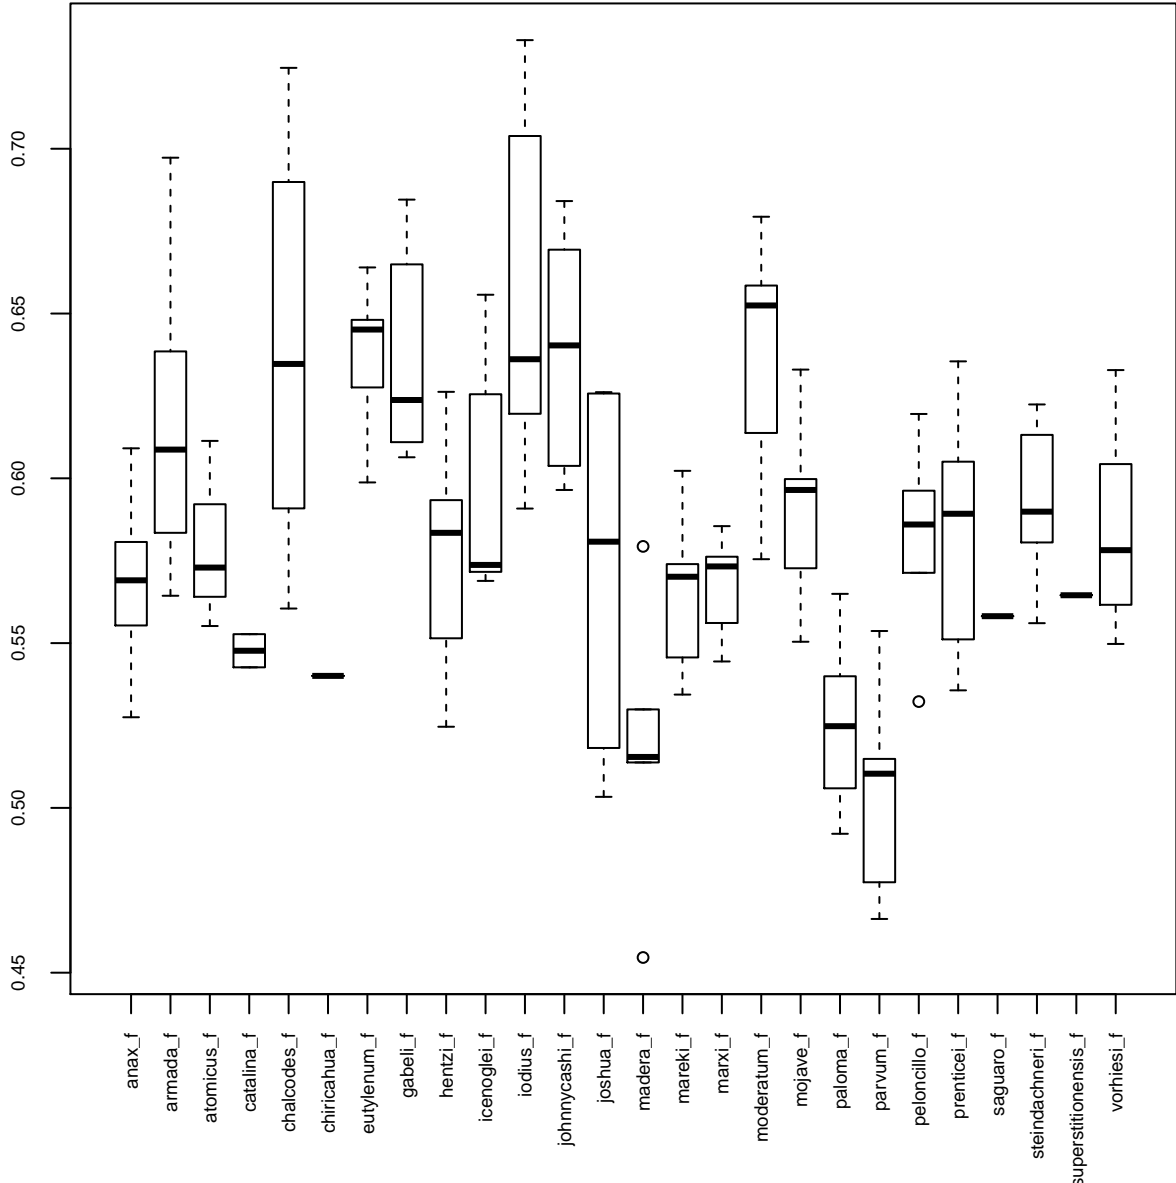

Supplement: Supplementary file 872

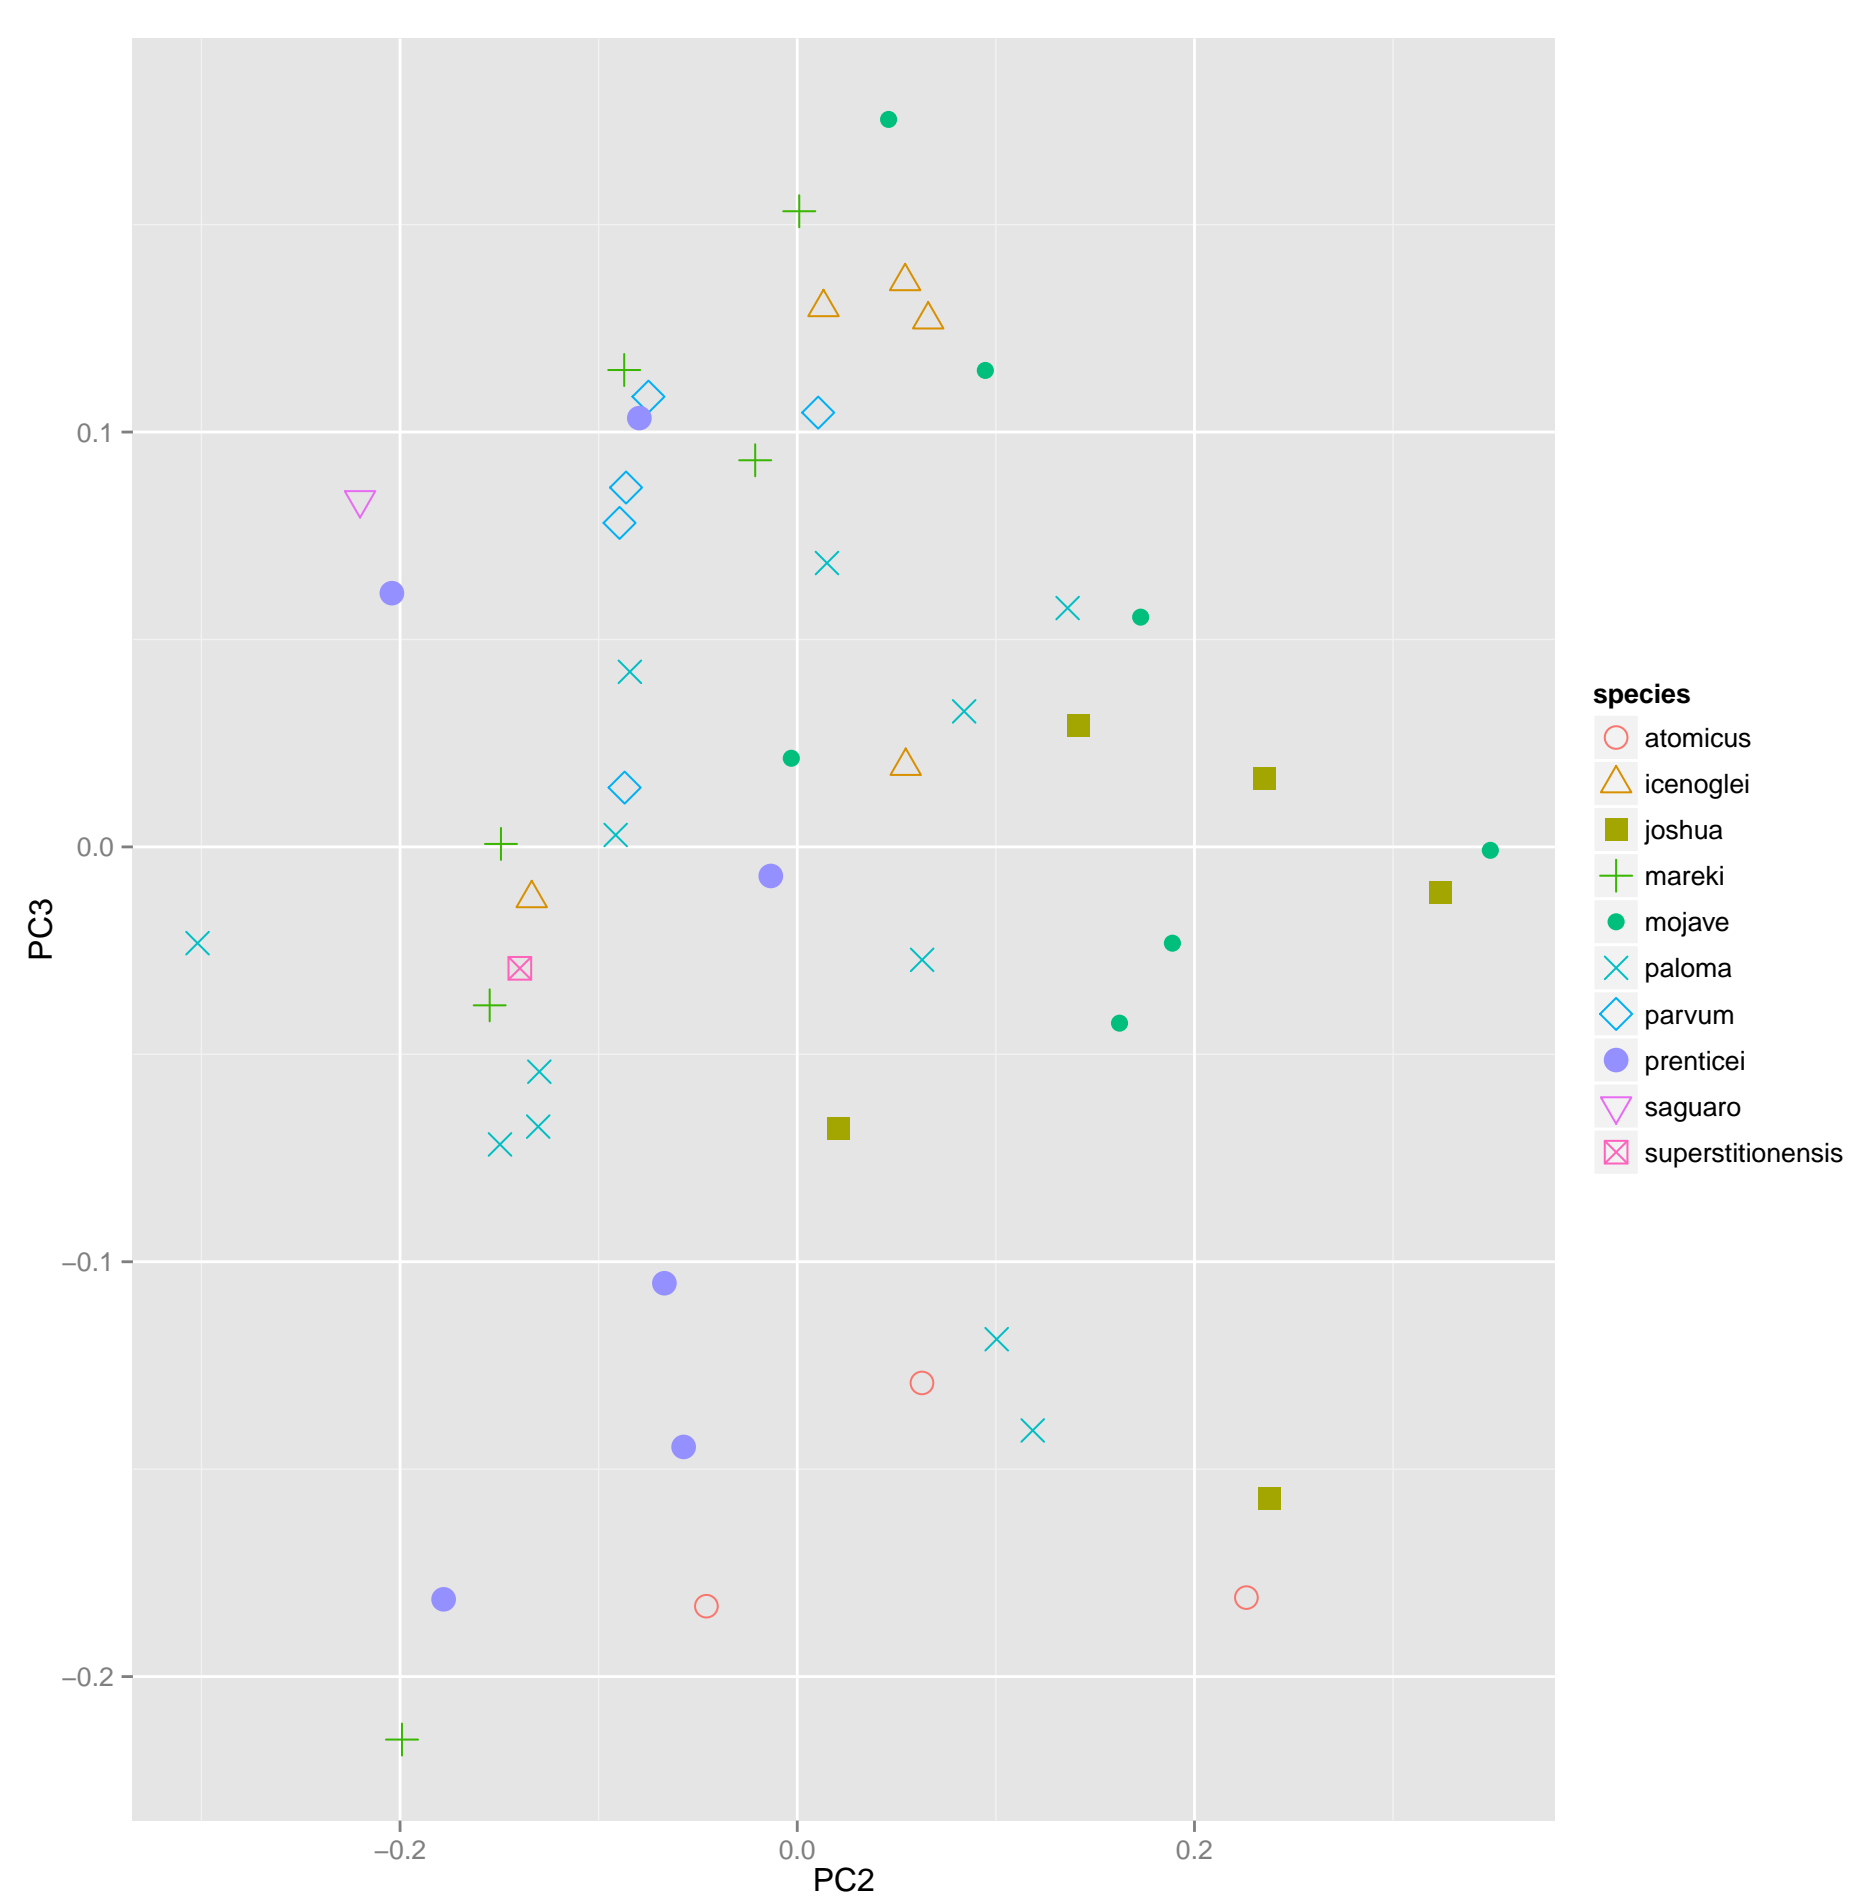

Supplement: Supplementary file 873

## Femur 1/Tibia 4 ratio – males

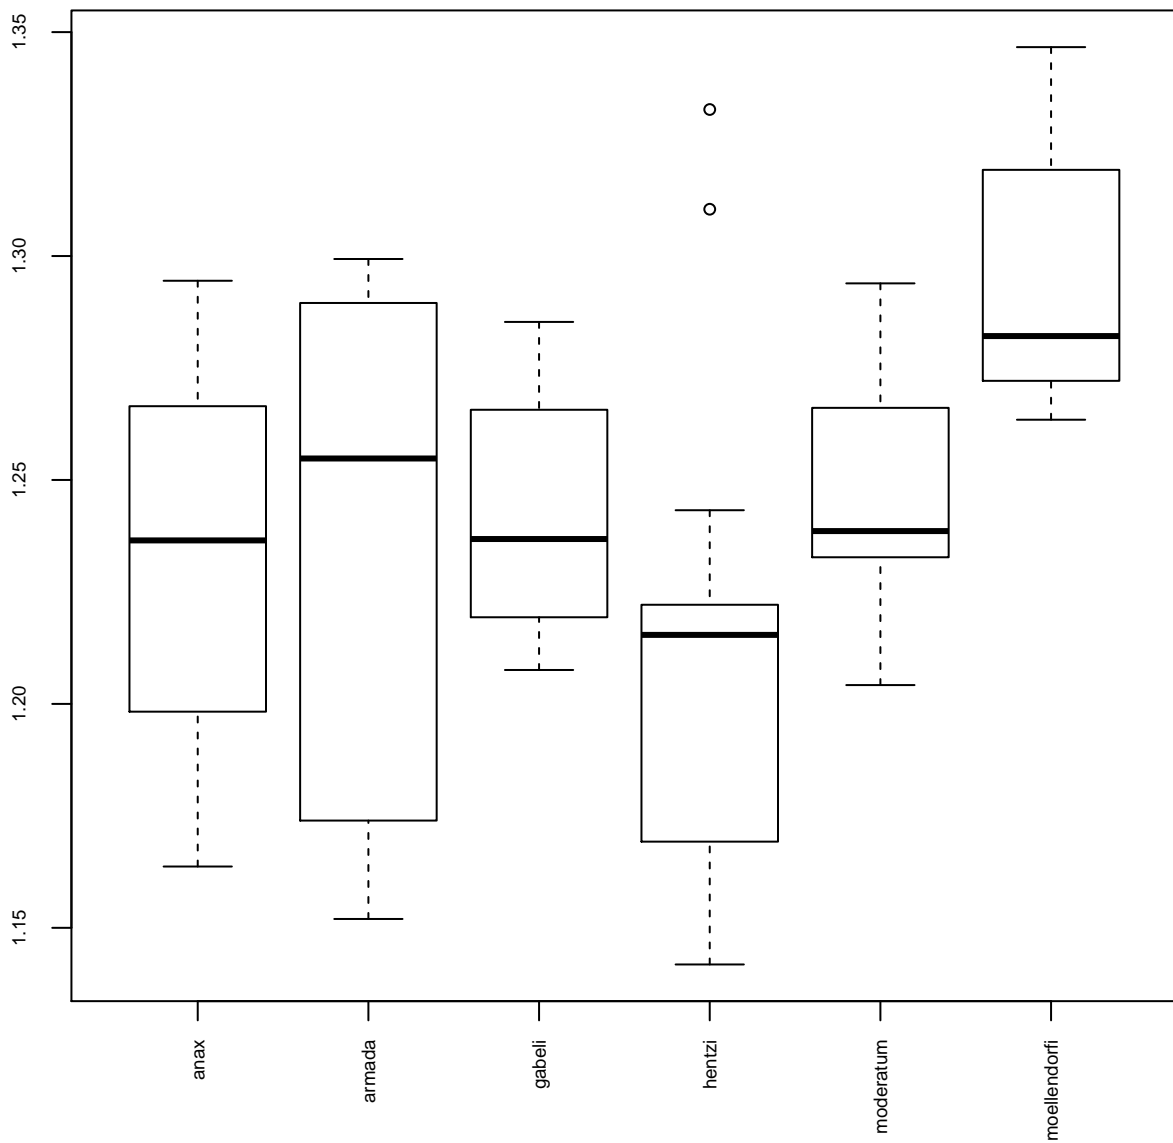

Supplement: Supplementary file 874

## Metatarsus 3/Tarsus 3 ratio – females

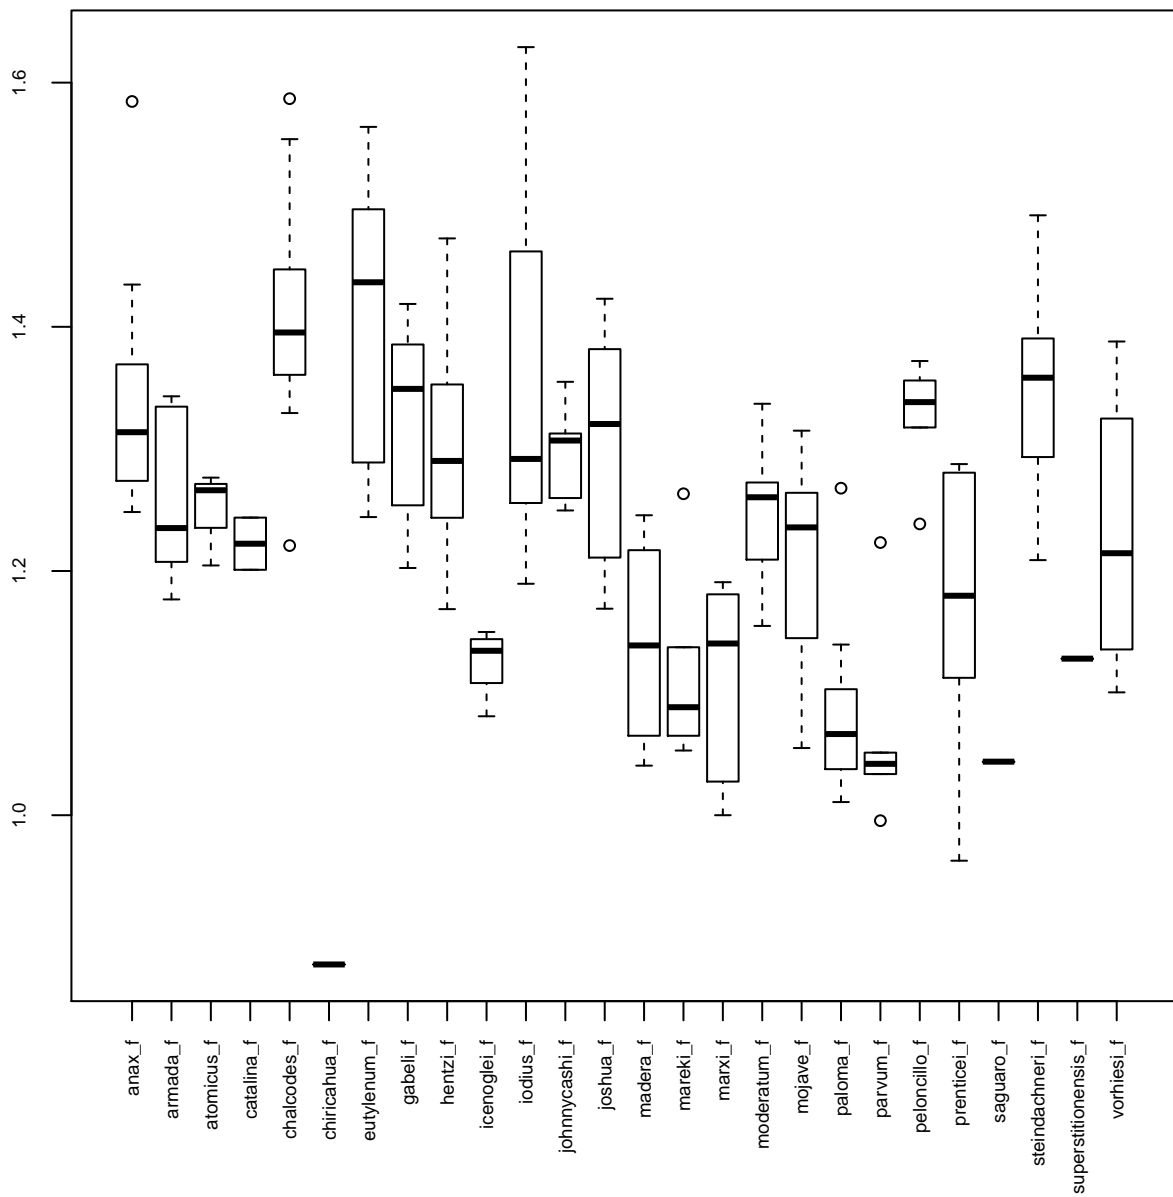

Supplement: Supplementary file 875

# Carapace Length/Patella 4 ratio – males

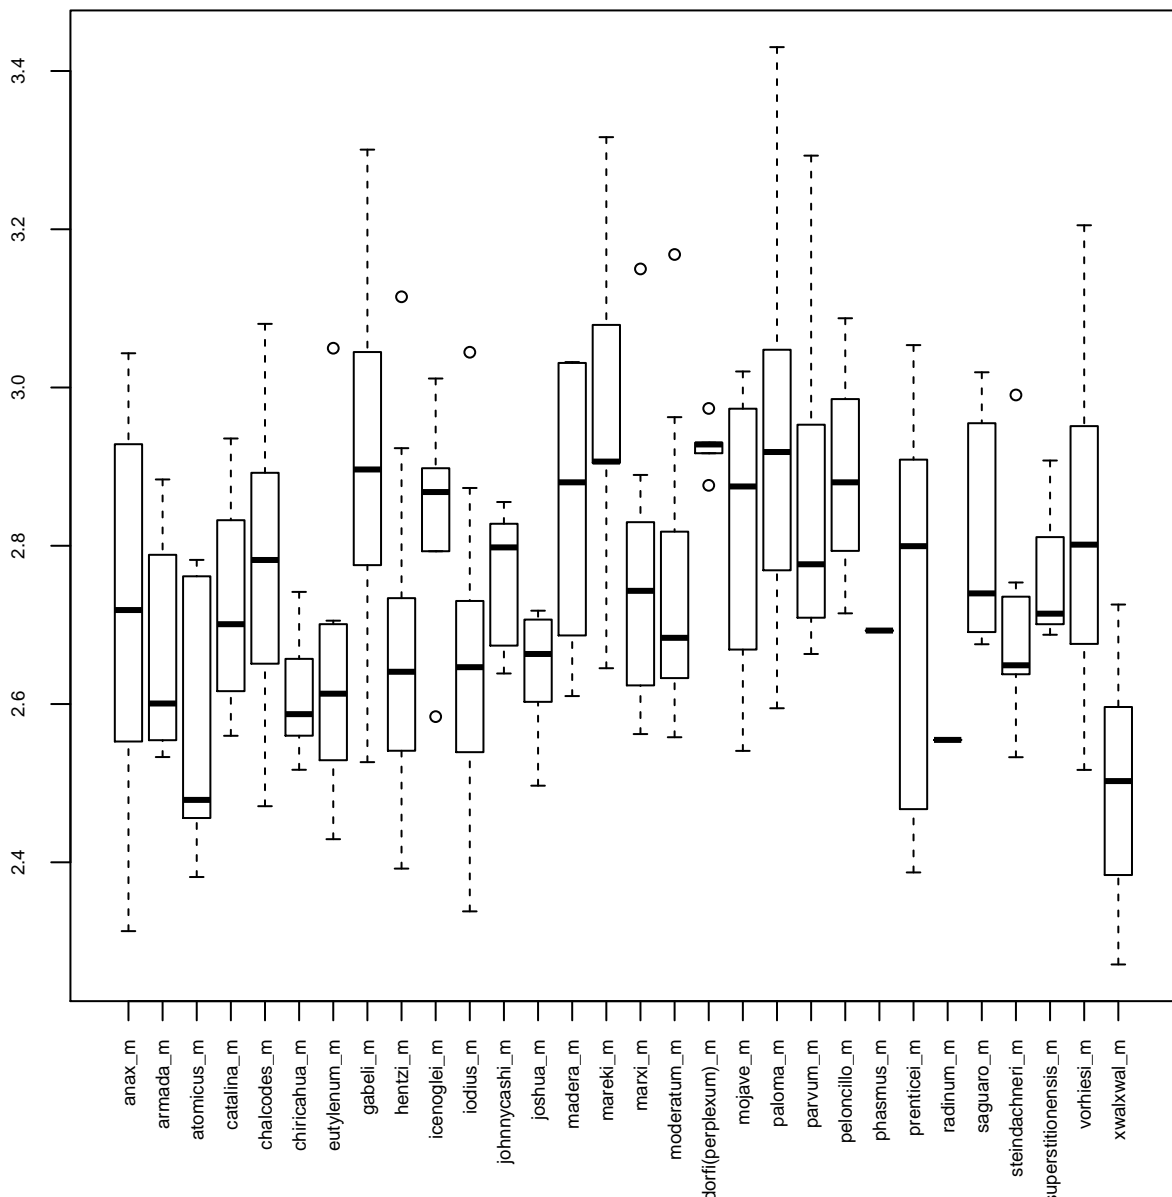

Supplement: Supplementary file 876

# Tarsus 3/Metatarsus 4 Length ratio – males

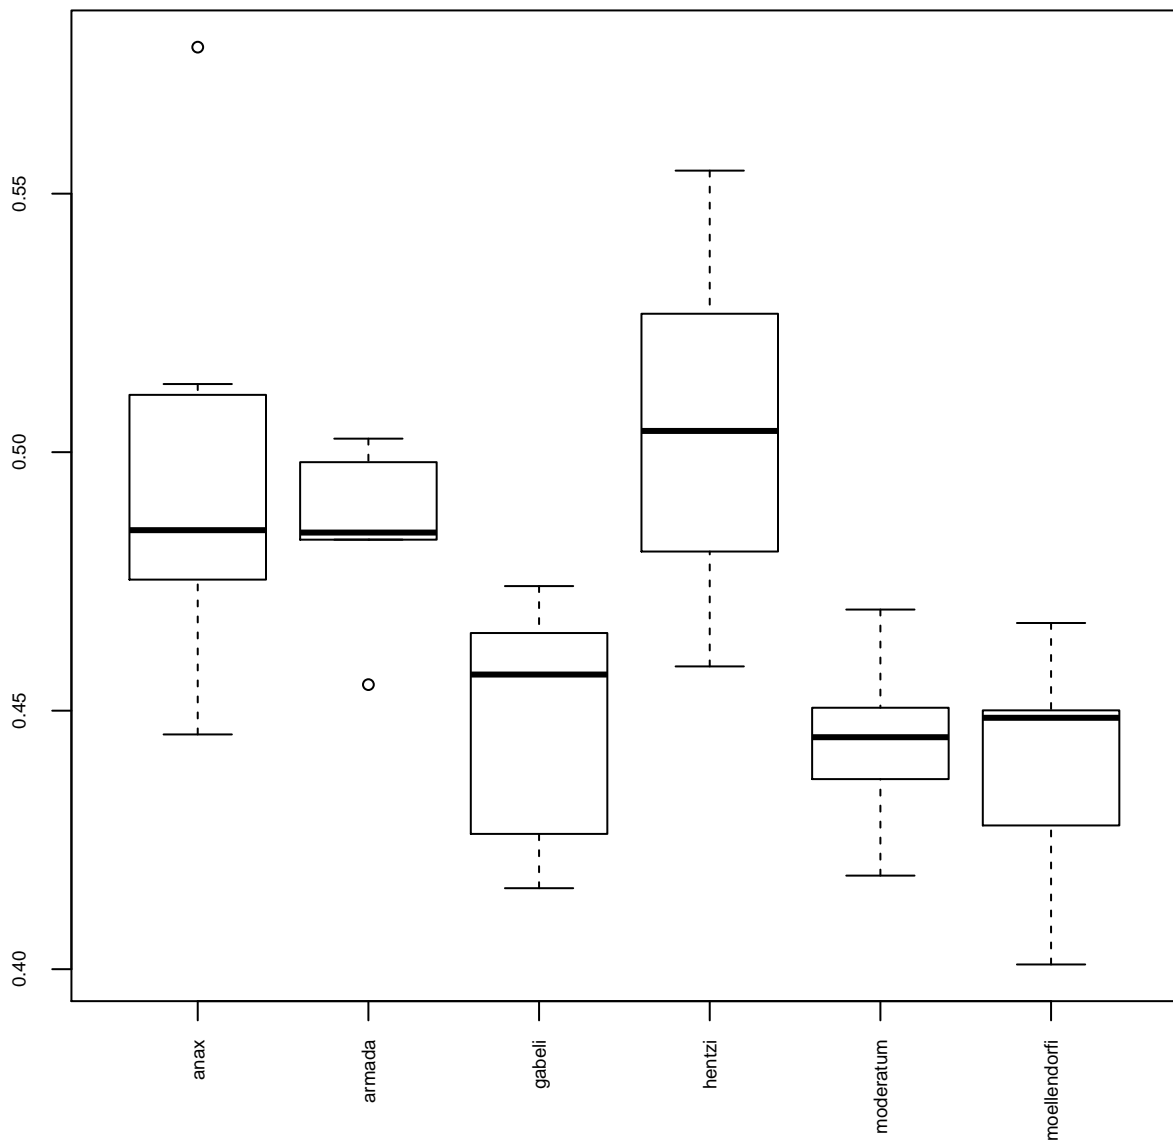

Supplement: Supplementary file 877

# Metatarsus 1/Tibia 3 Length ratio – males

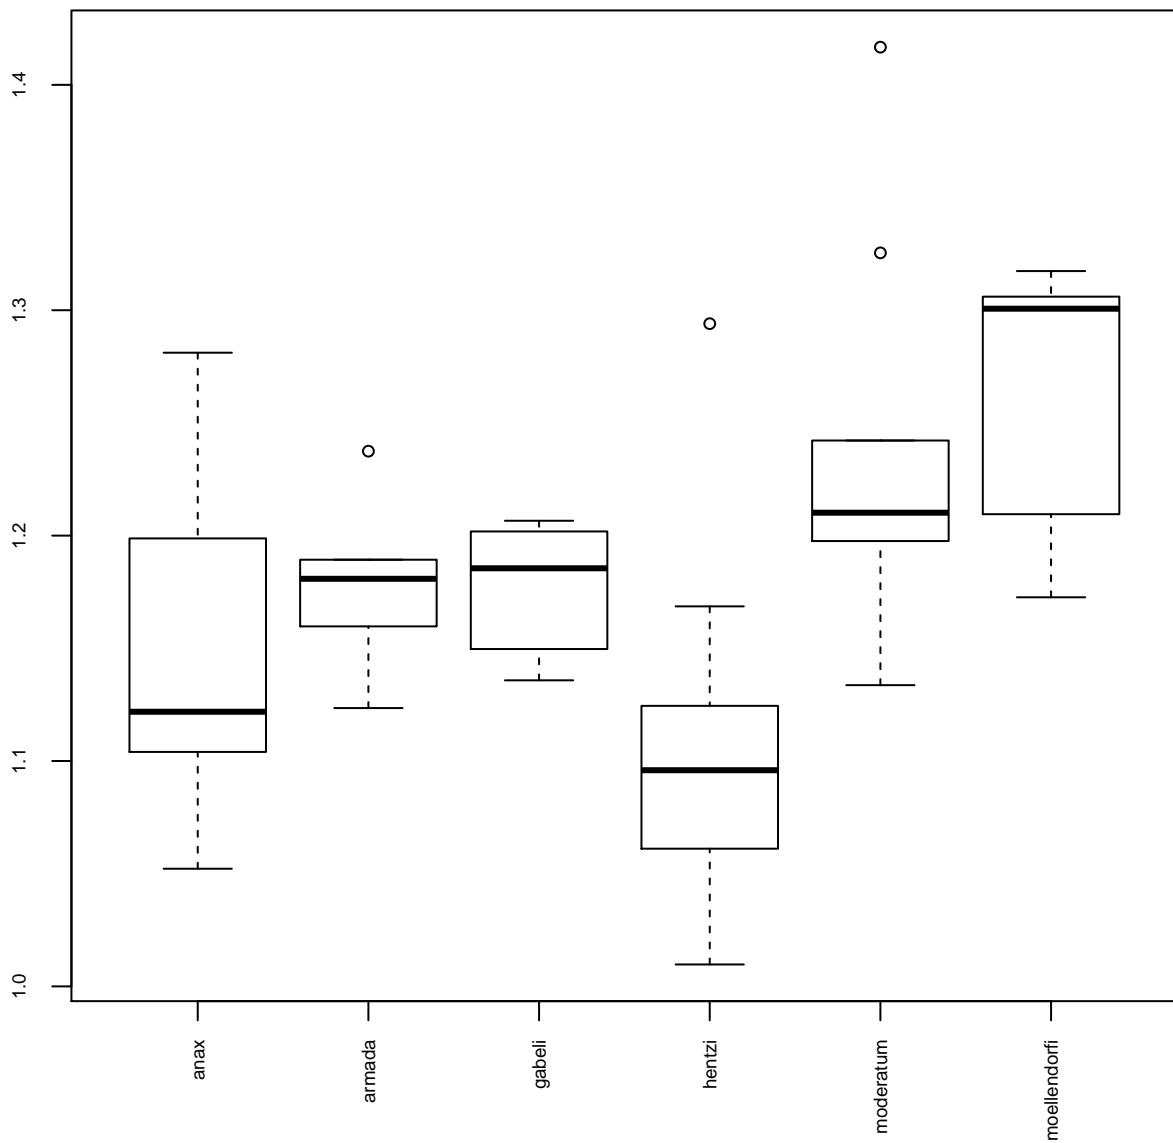

Supplement: Supplementary file 878

## Patella 1/Tarsus 4 Length ratio – males

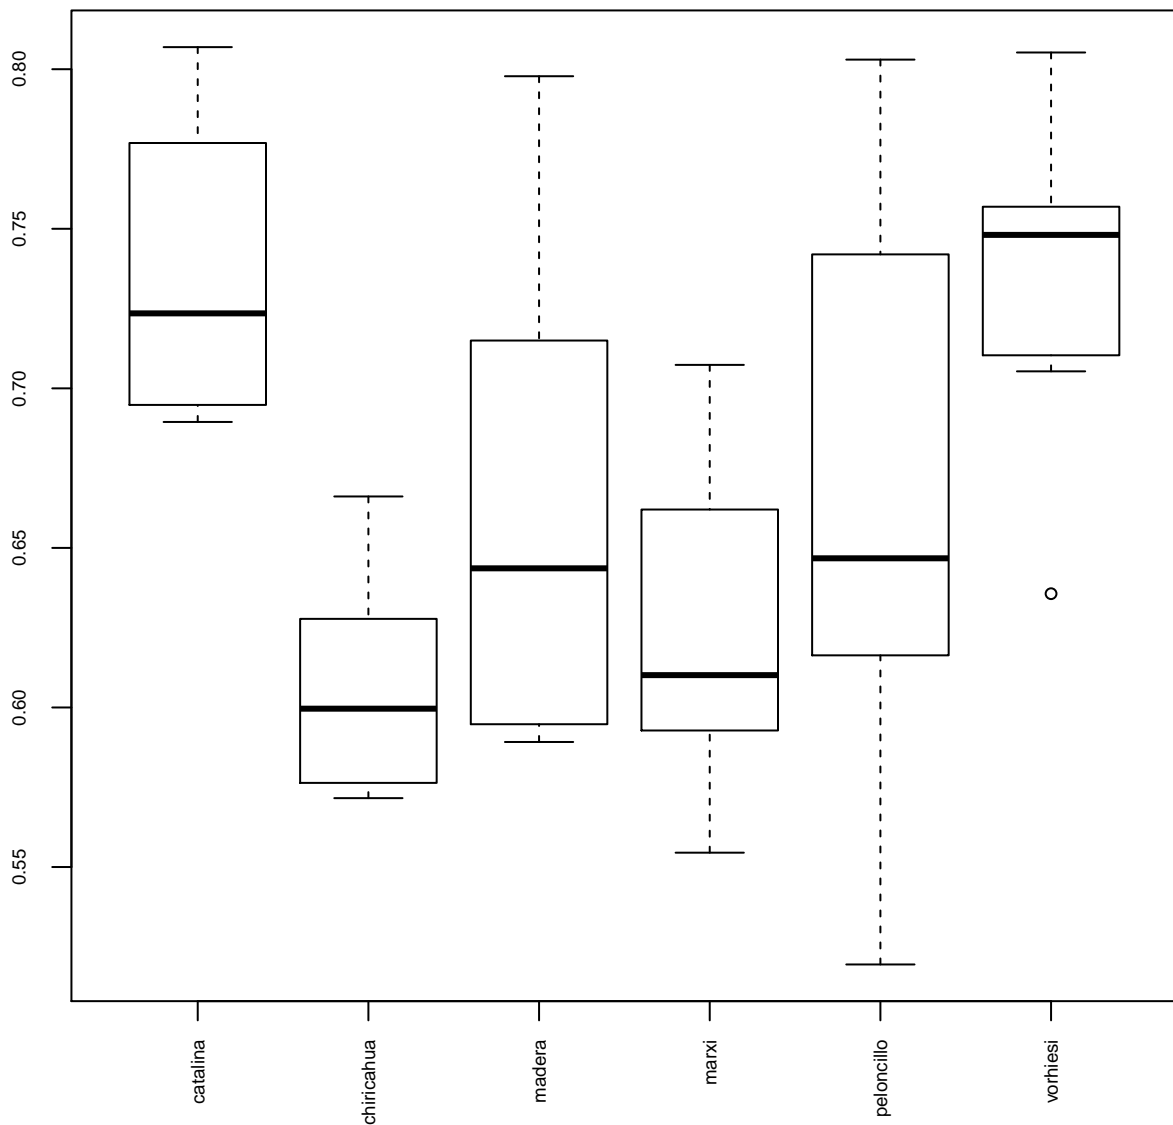

Supplement: Supplementary file 879

# Metatarsus 1/Metatarsus 4 ratio – females

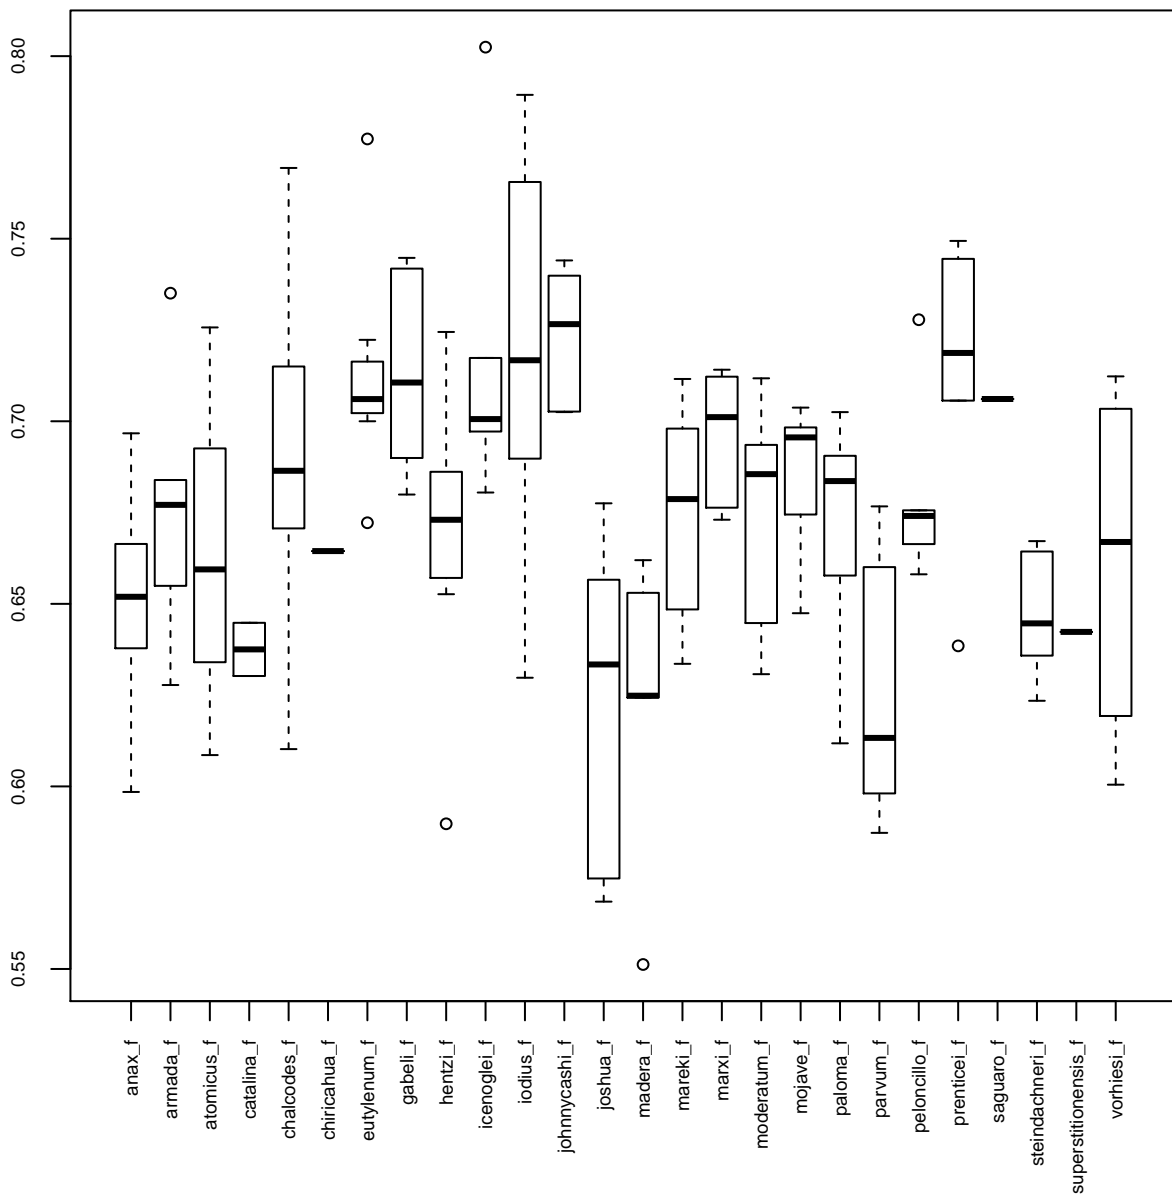

Supplement: Supplementary file 880

## Patella 3/Metatarsus 3 ratio – females

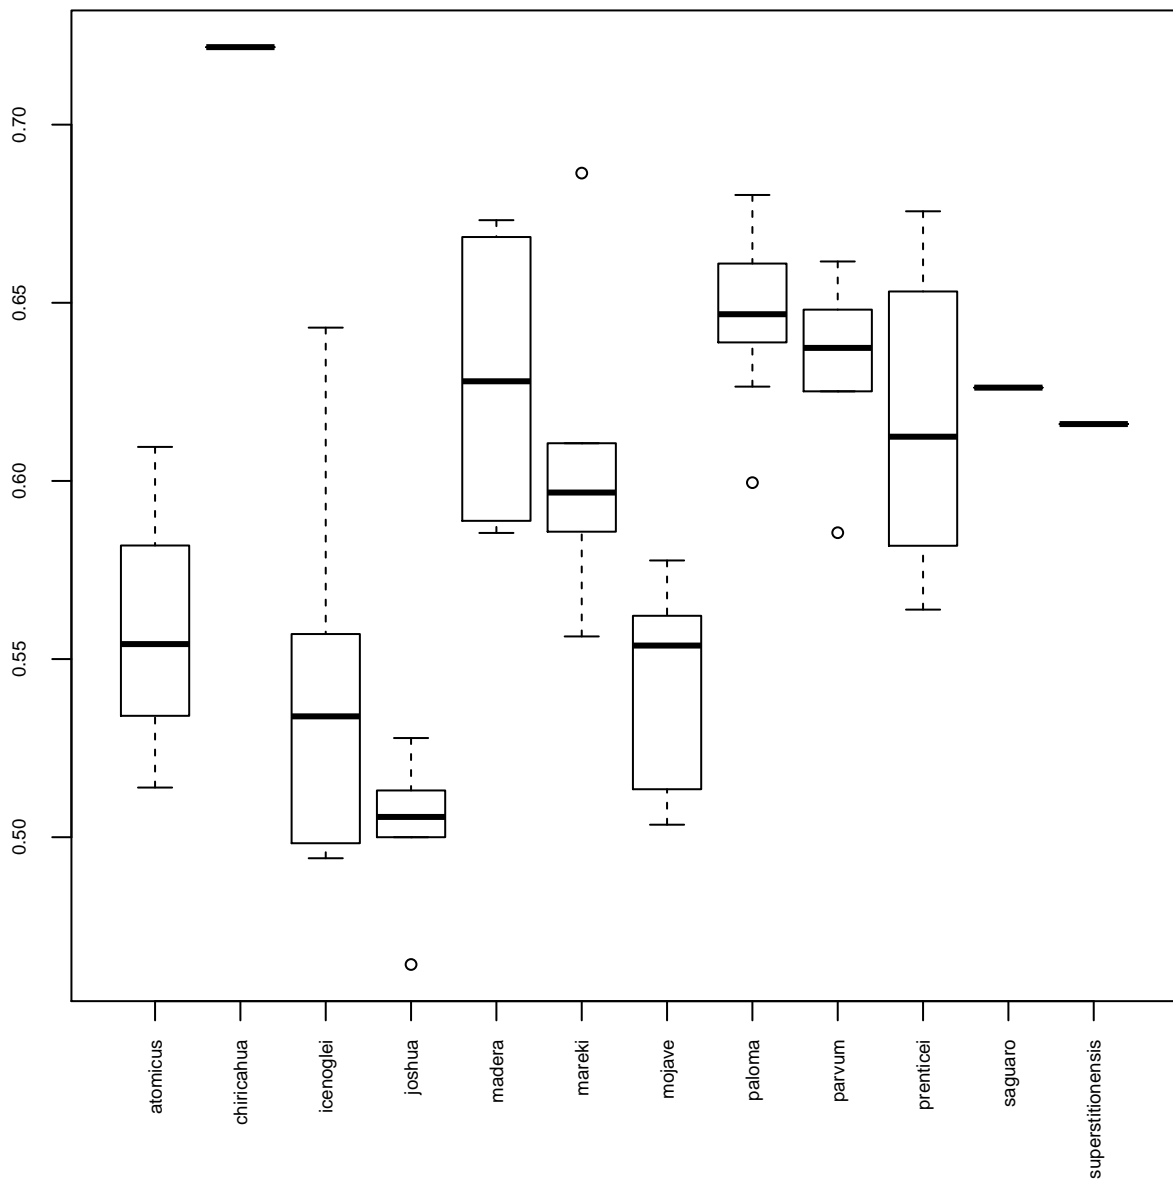

Supplement: Supplementary file 881

## Tibia 3/Femur 4 Length ratio – males

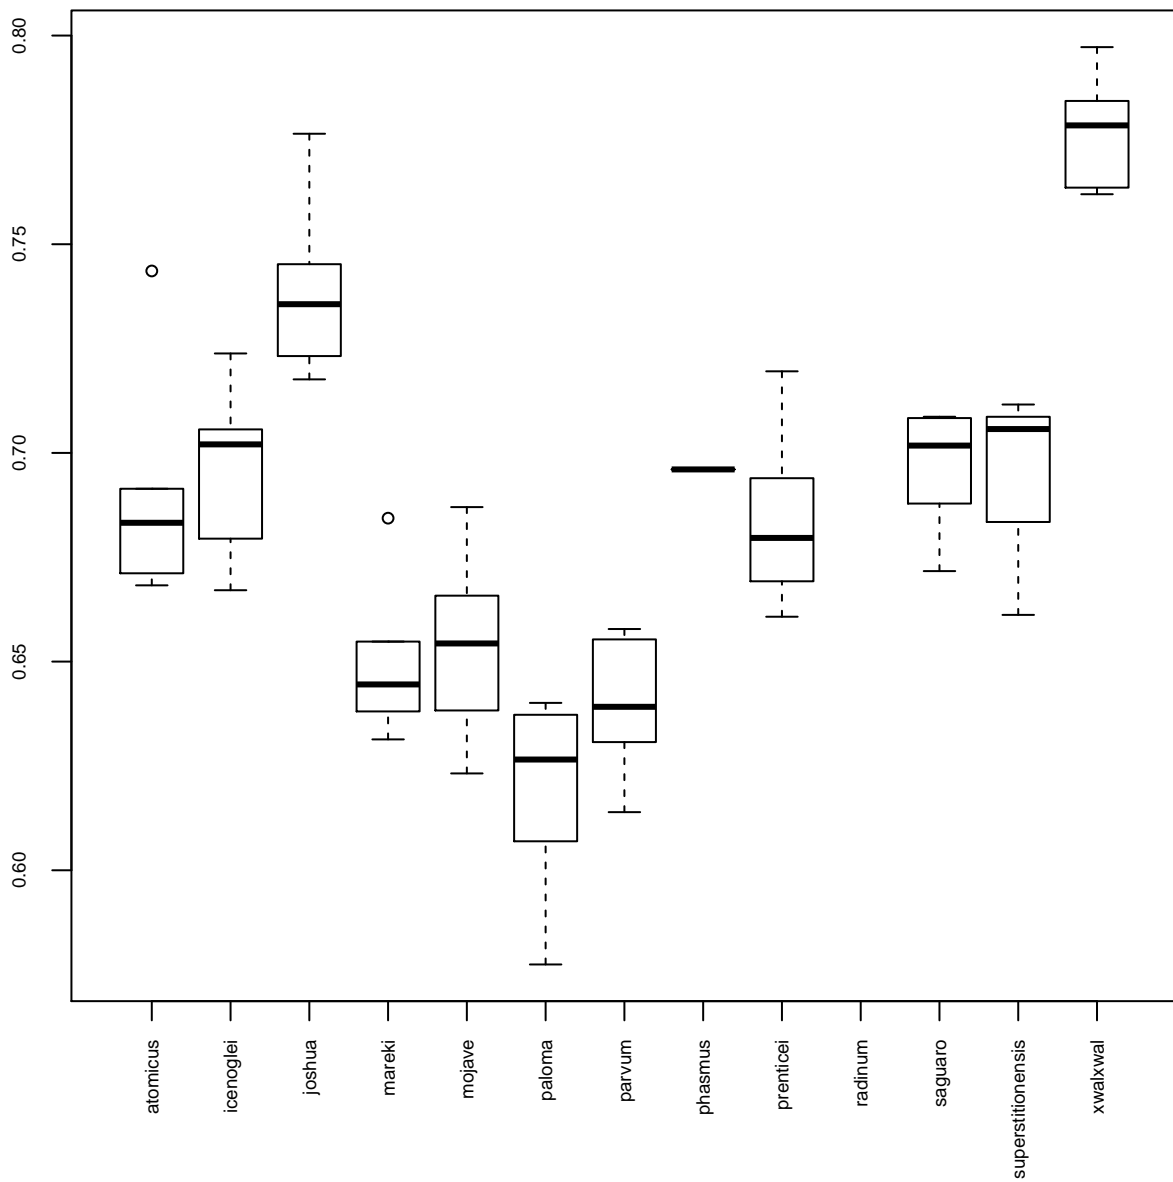

Supplement: Supplementary file 882

# Carapace Length/Width ratio – males

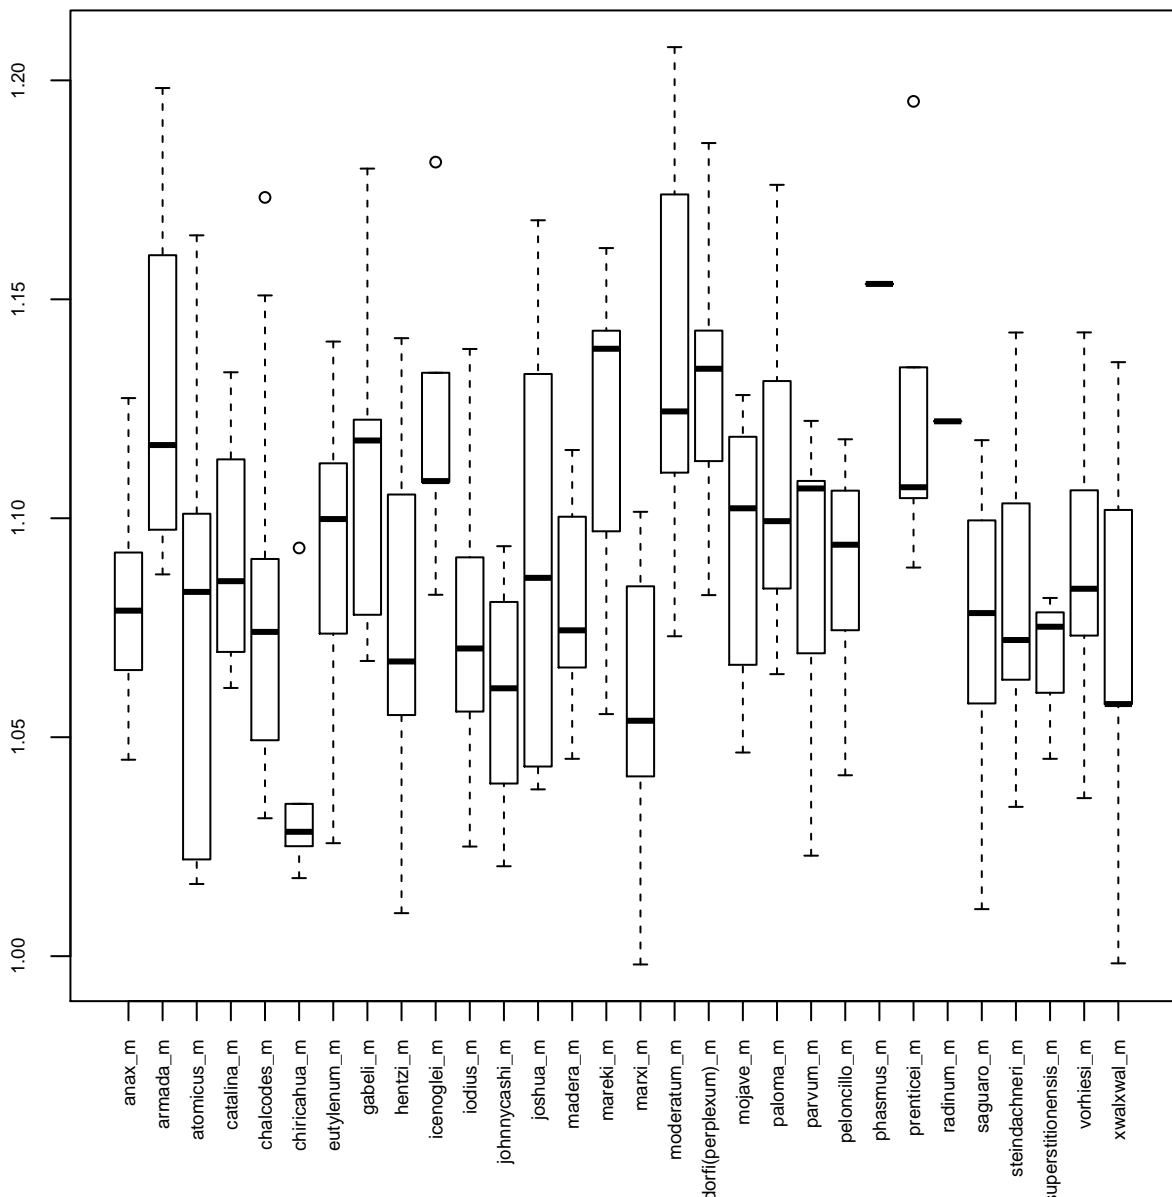

Supplement: Supplementary file 883

# Patella 4/Metatarsus 4 ratio – males

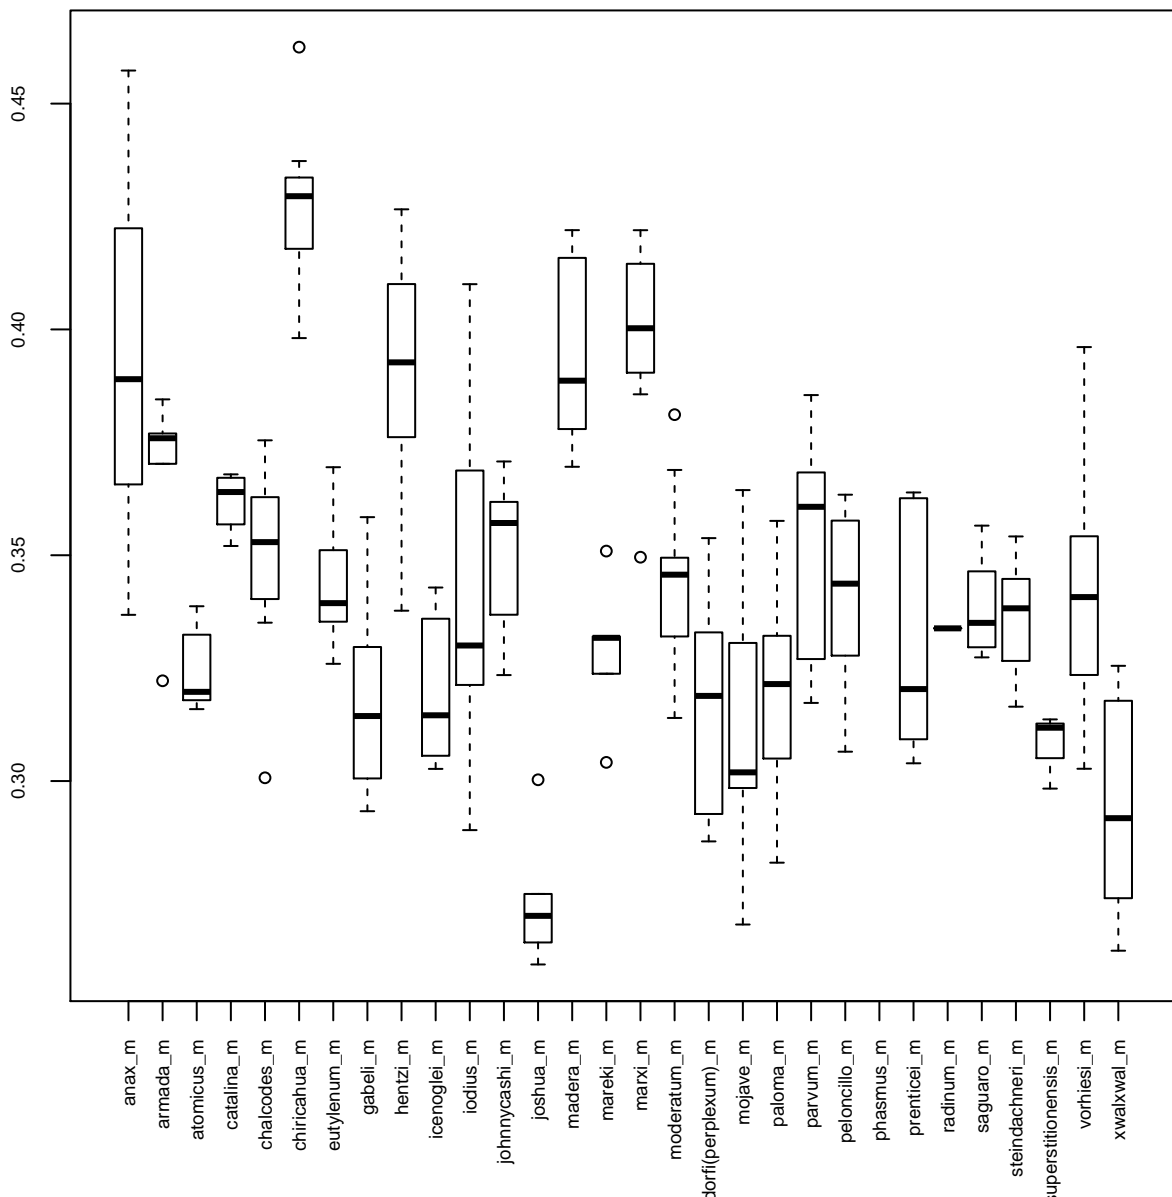

Supplement: Supplementary file 884

## Tibia 3/Tarsus 4 Length ratio – females

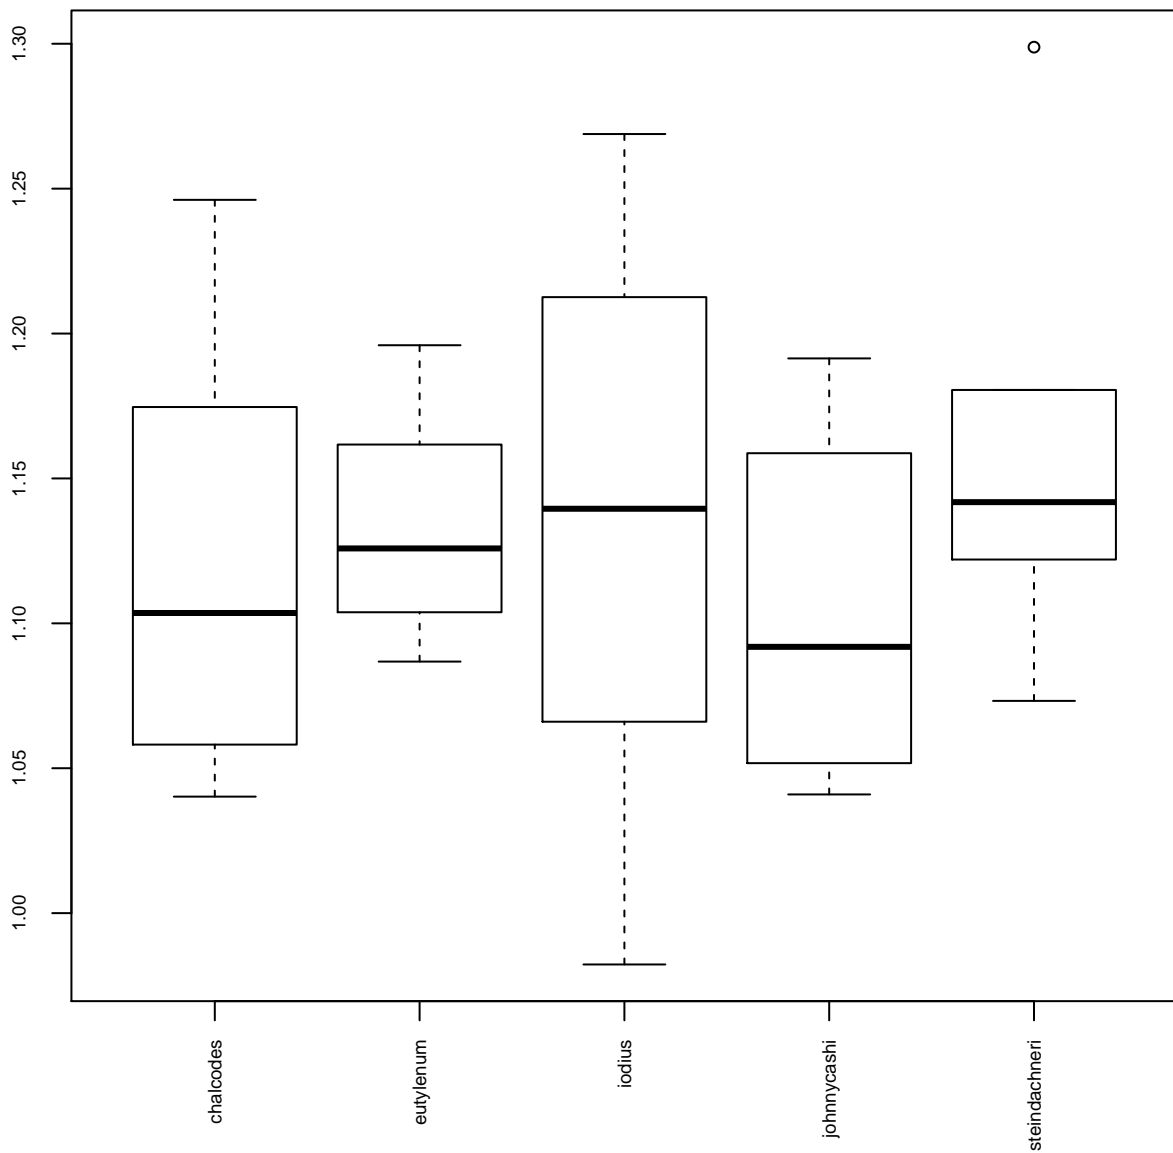

Supplement: Supplementary file 885

## Femur 1/Metatarsus 4 ratio – males

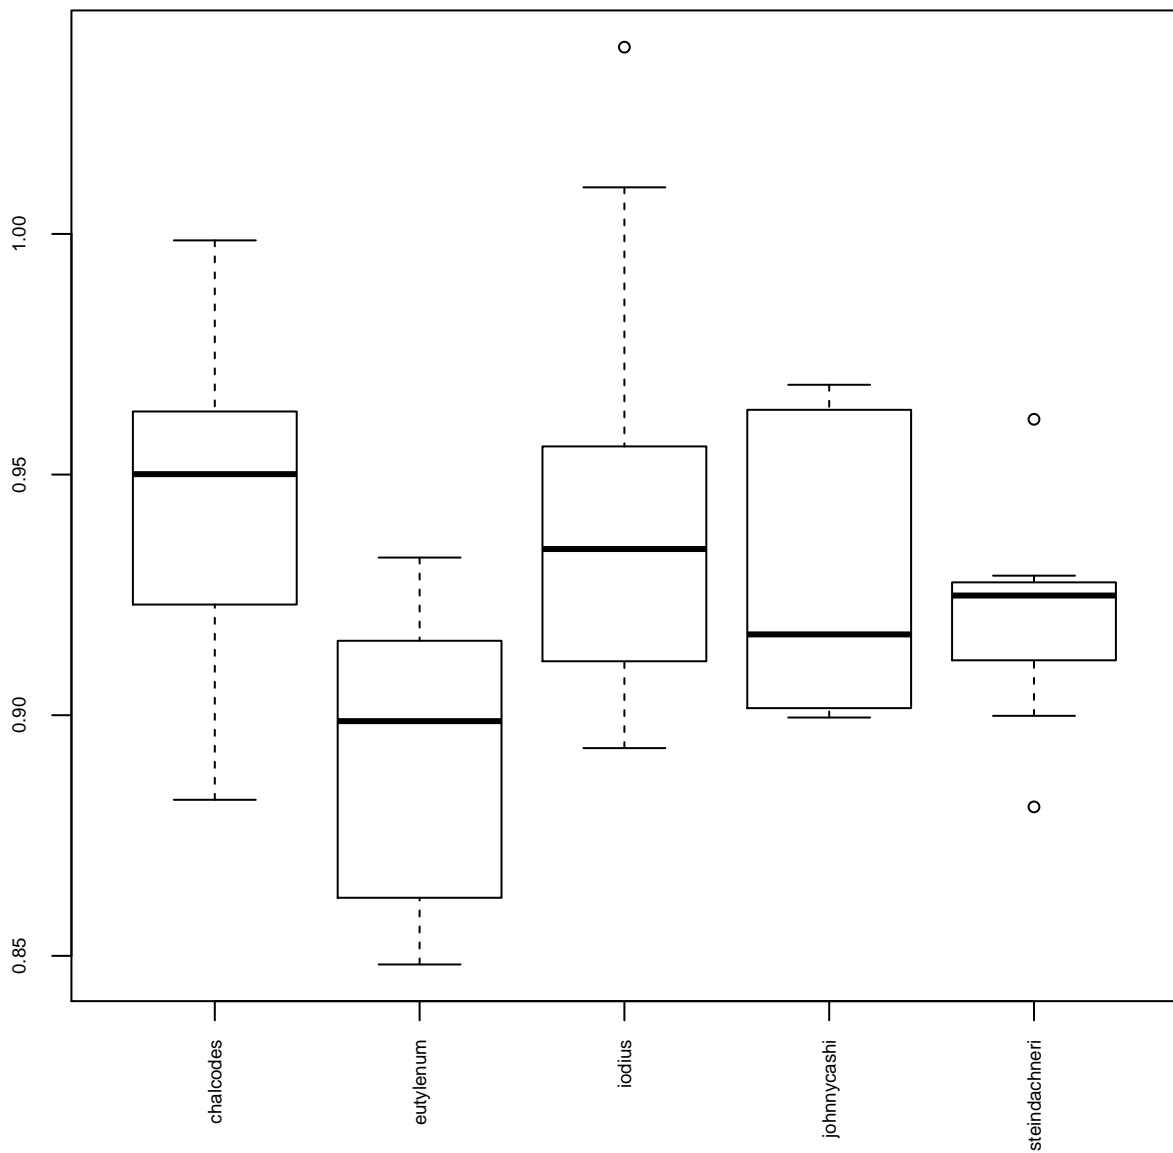

Supplement: Supplementary file 886

## Tibia 3/Patella 4 Length ratio – males

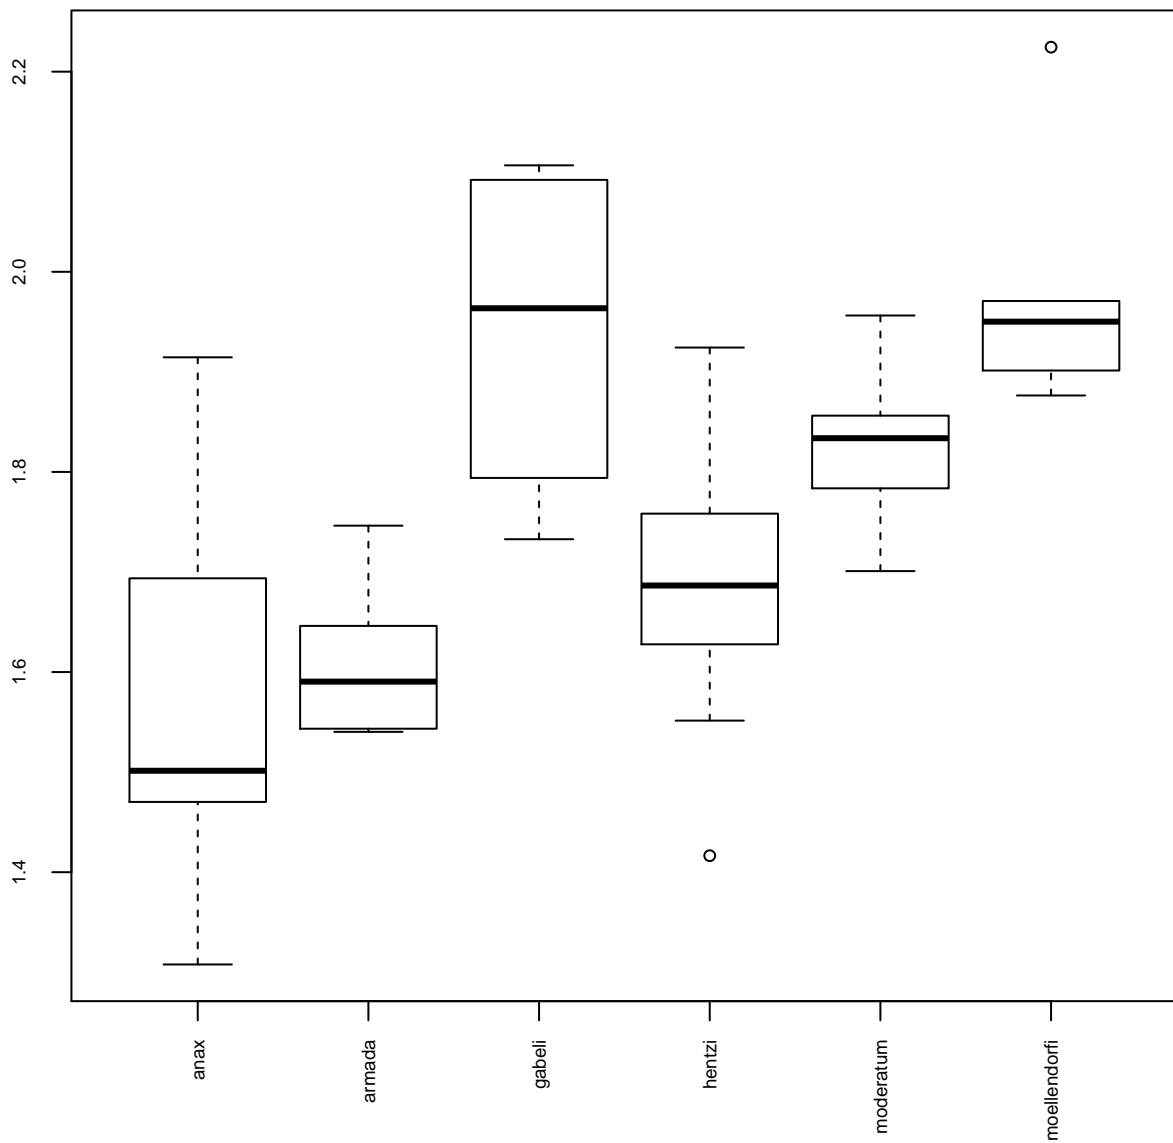

Supplement: Supplementary file 887

## Metatarsus 3/Metatarsus 4 ratio – females

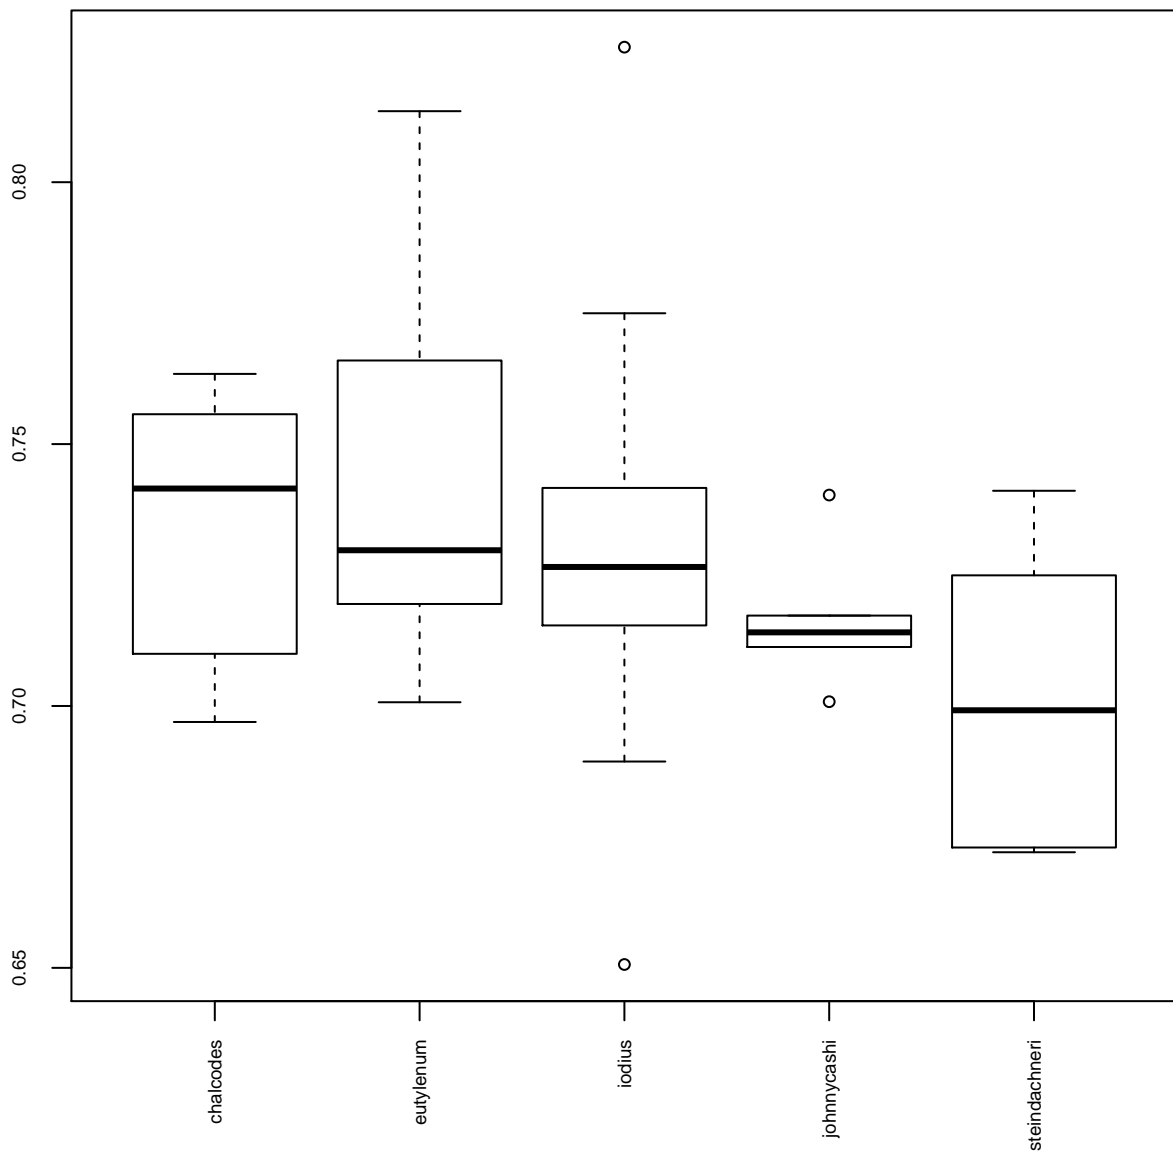

Supplement: Supplementary file 888

## Leg 4 Length – females

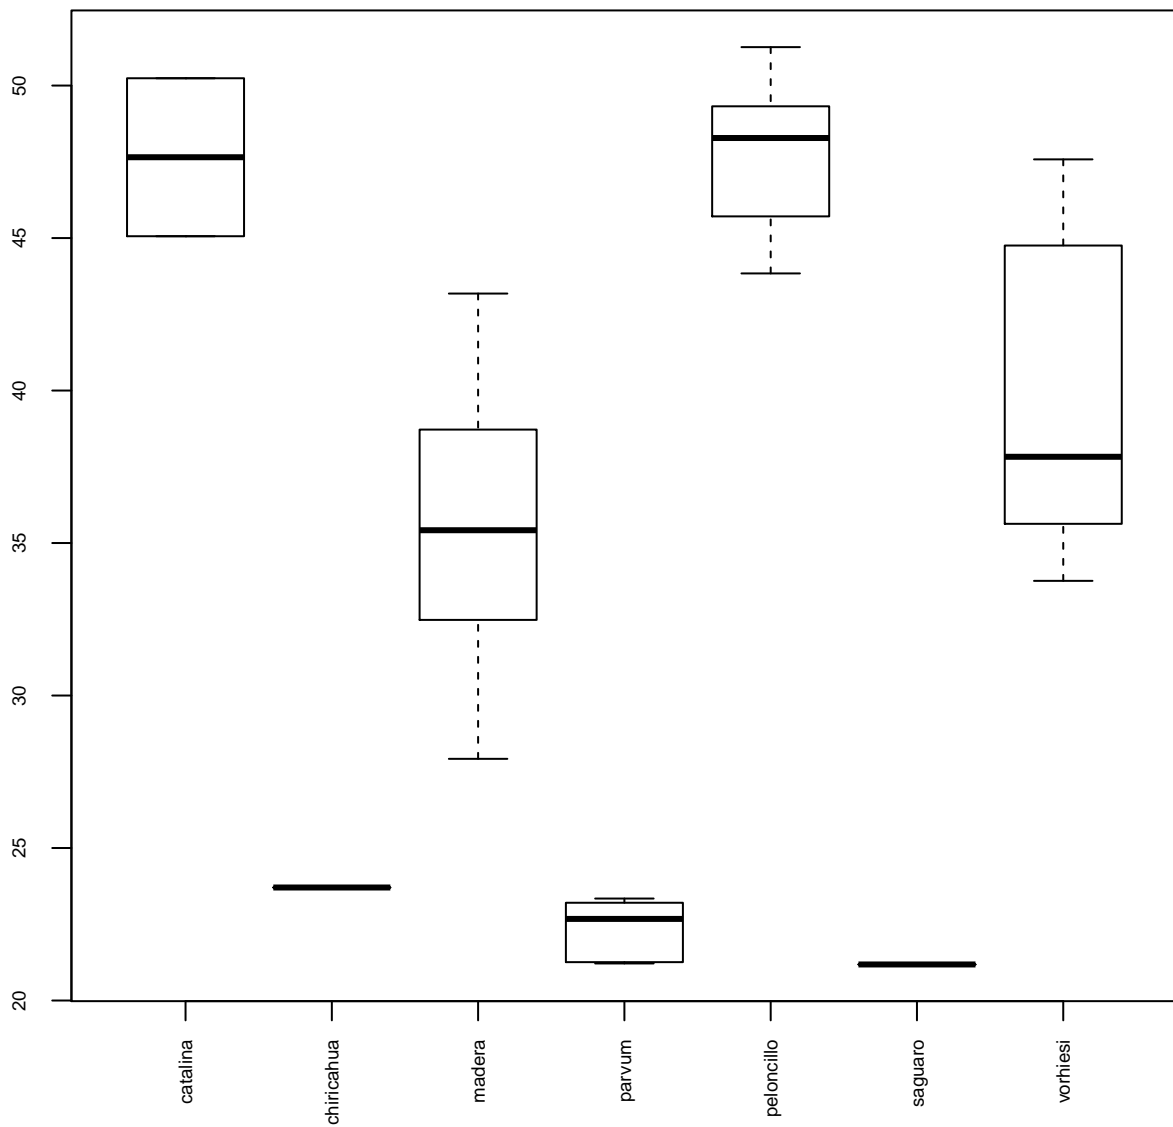

Supplement: Supplementary file 889

# Tibia 1/Metatarsus 4 Length ratio – males

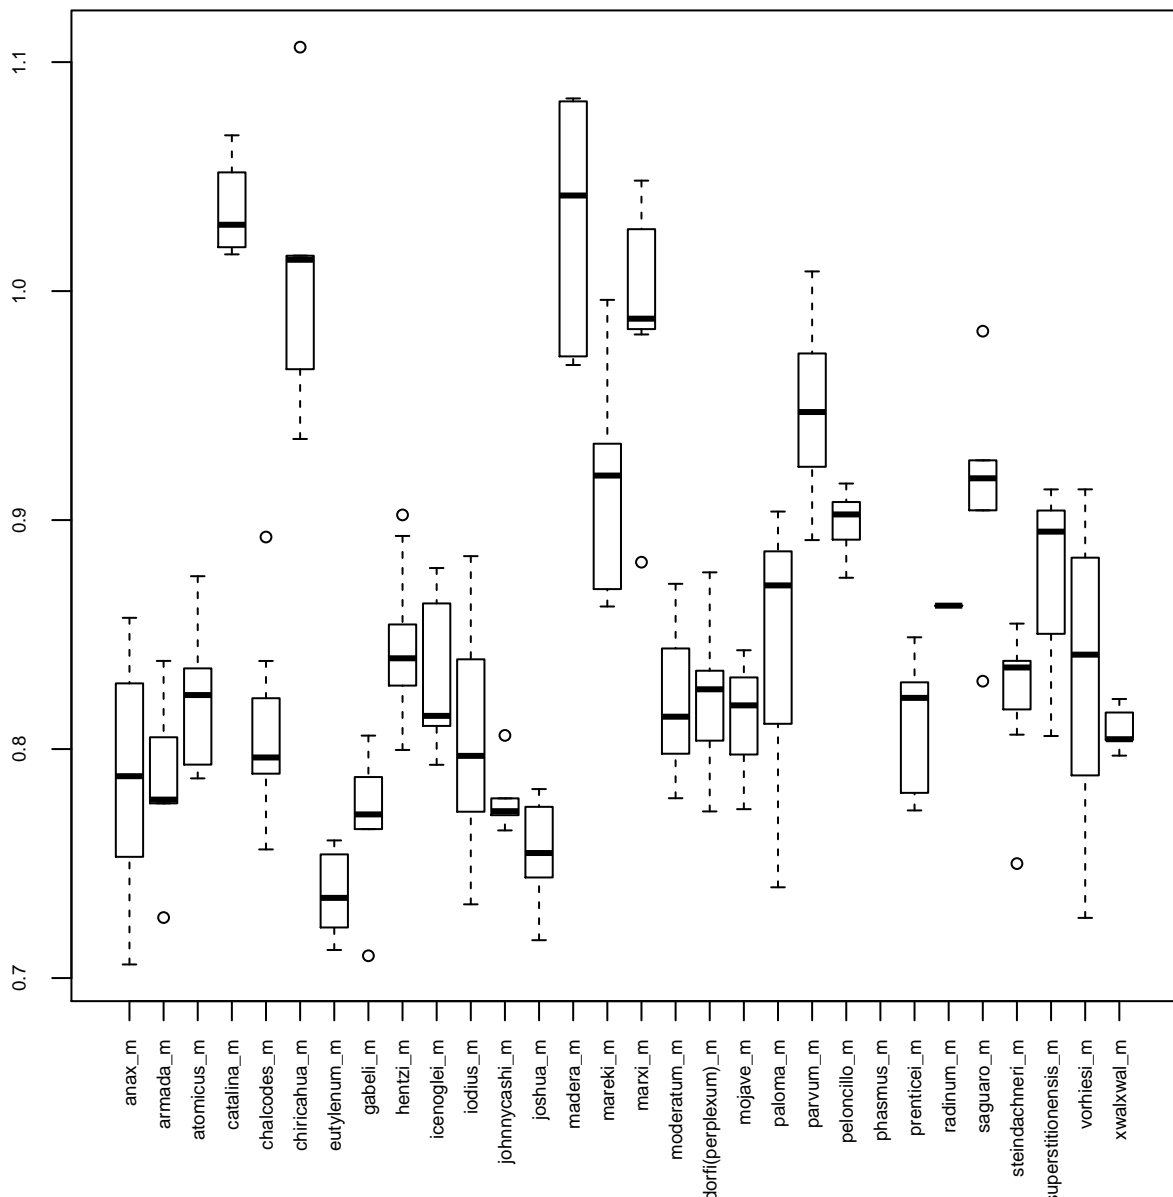

Supplement: Supplementary file 890

## Palpal Tibia/Tarsus 3 Length ratio – males

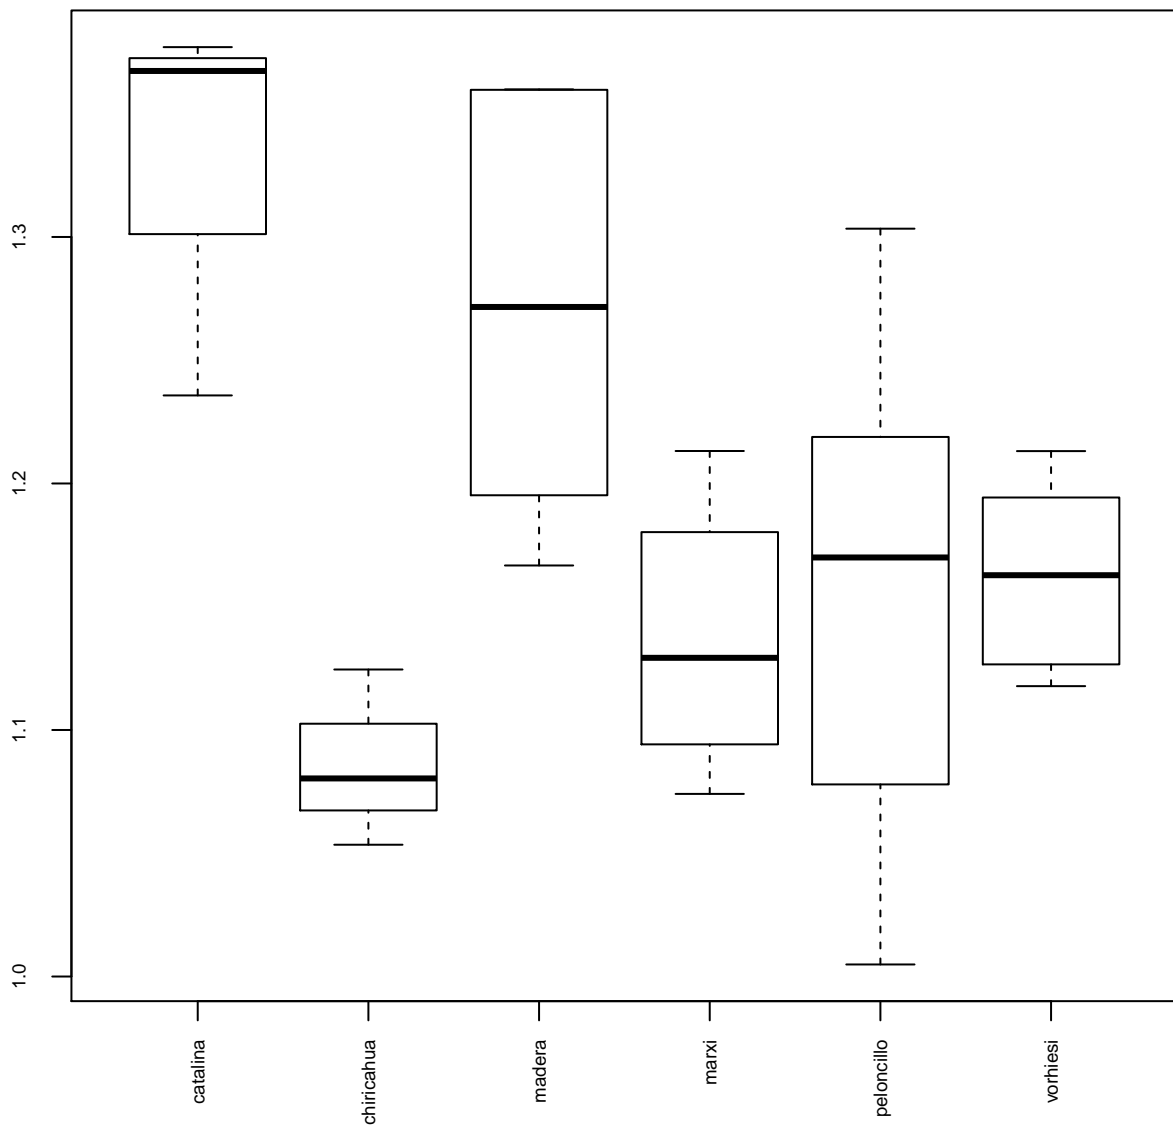

Supplement: Supplementary file 891

## Femur 3/Tibia 4 Length ratio – males

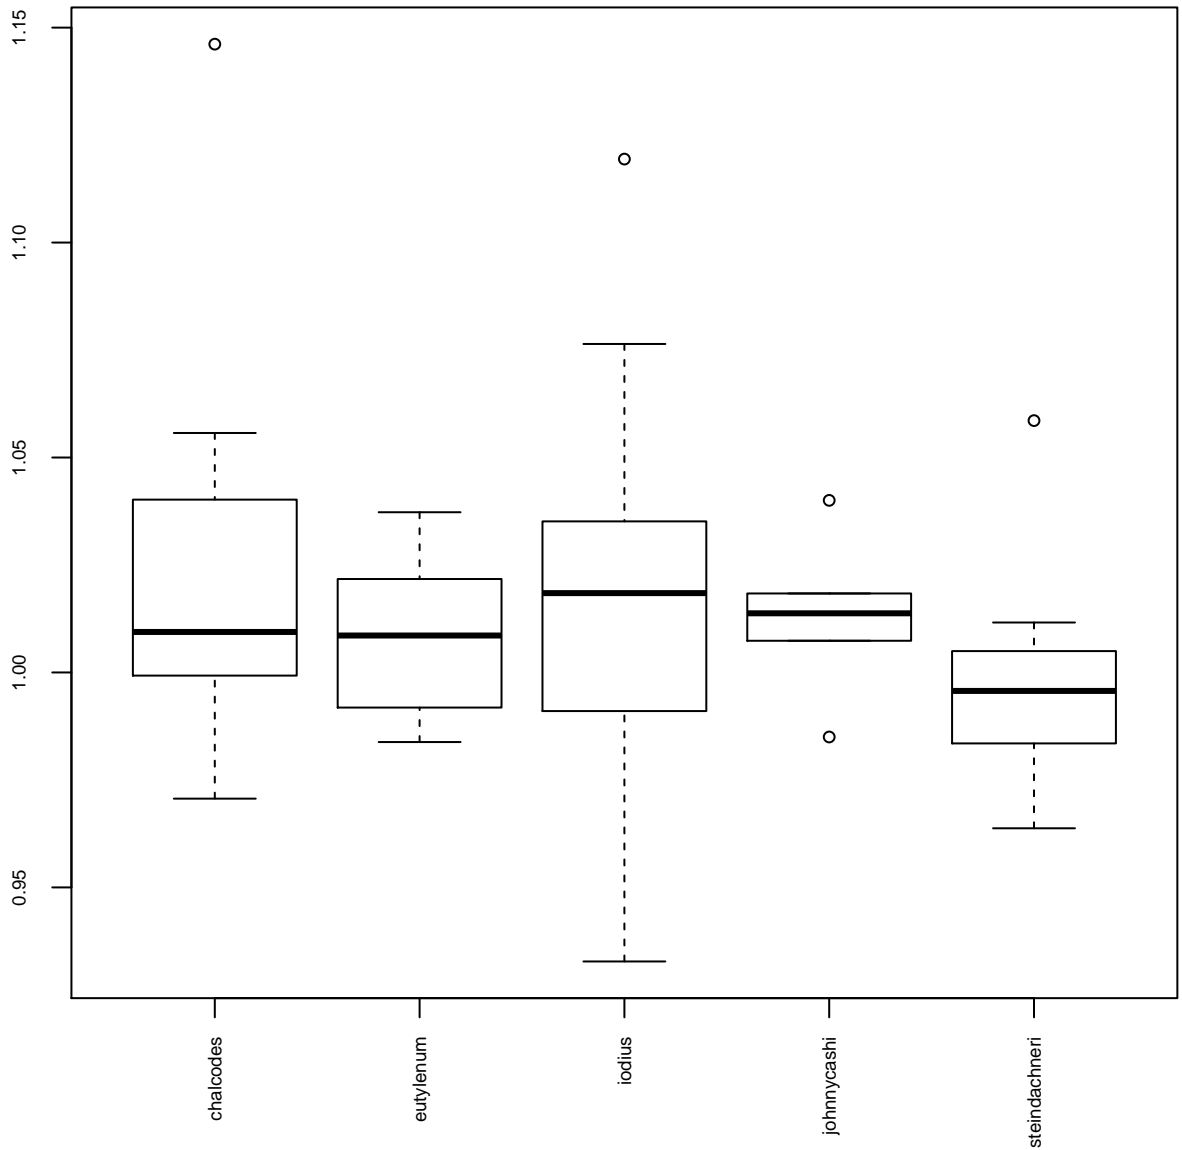

Supplement: Supplementary file 892

## Femur 1/Metatarsus 3 ratio – females

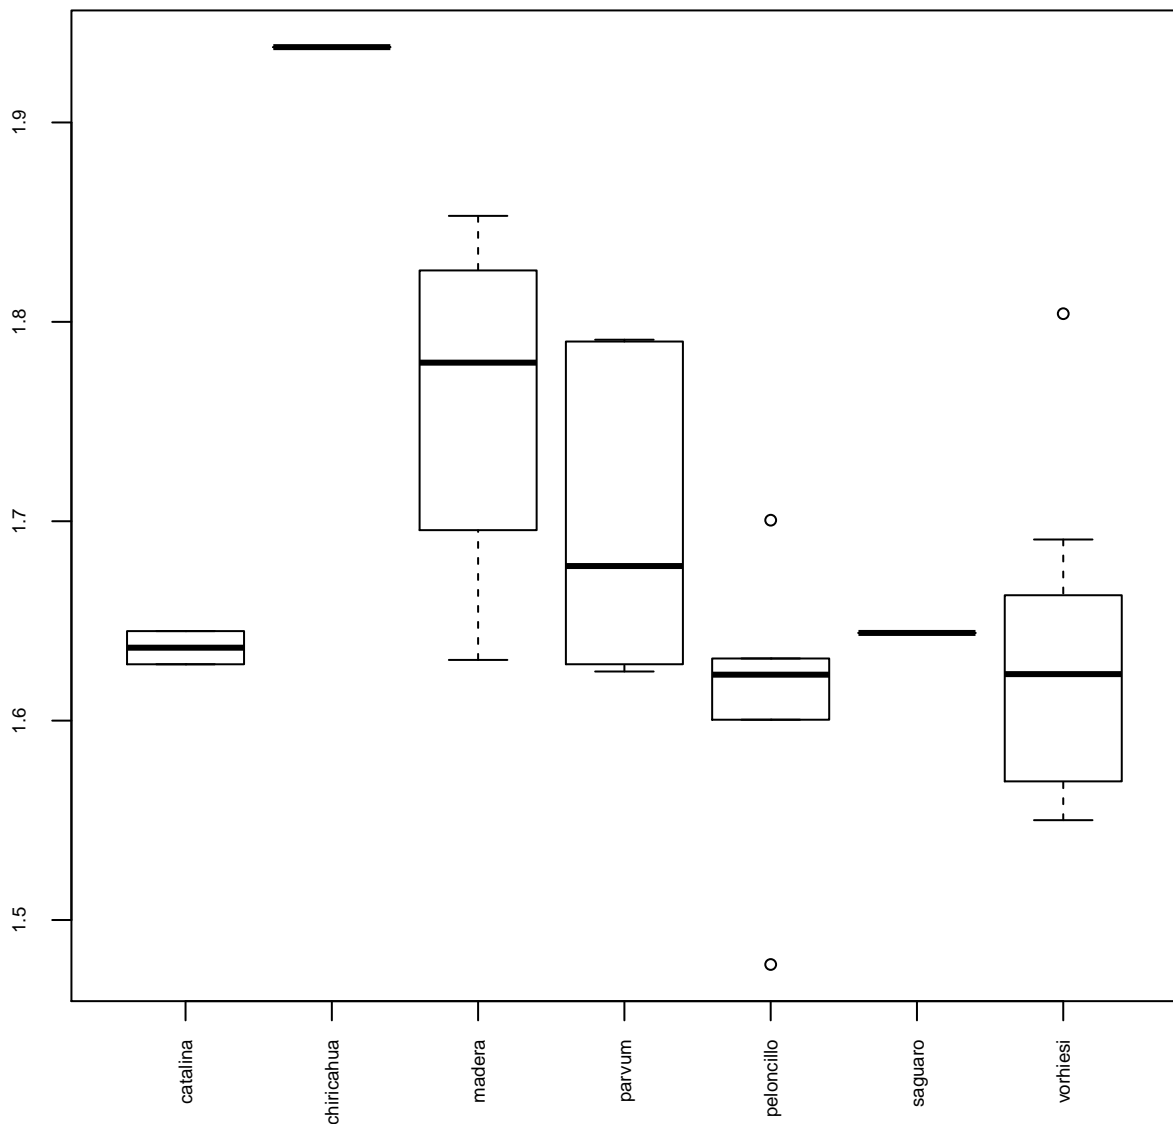

Supplement: Supplementary file 893

## Tibia 1/Femur 3 Length ratio – females

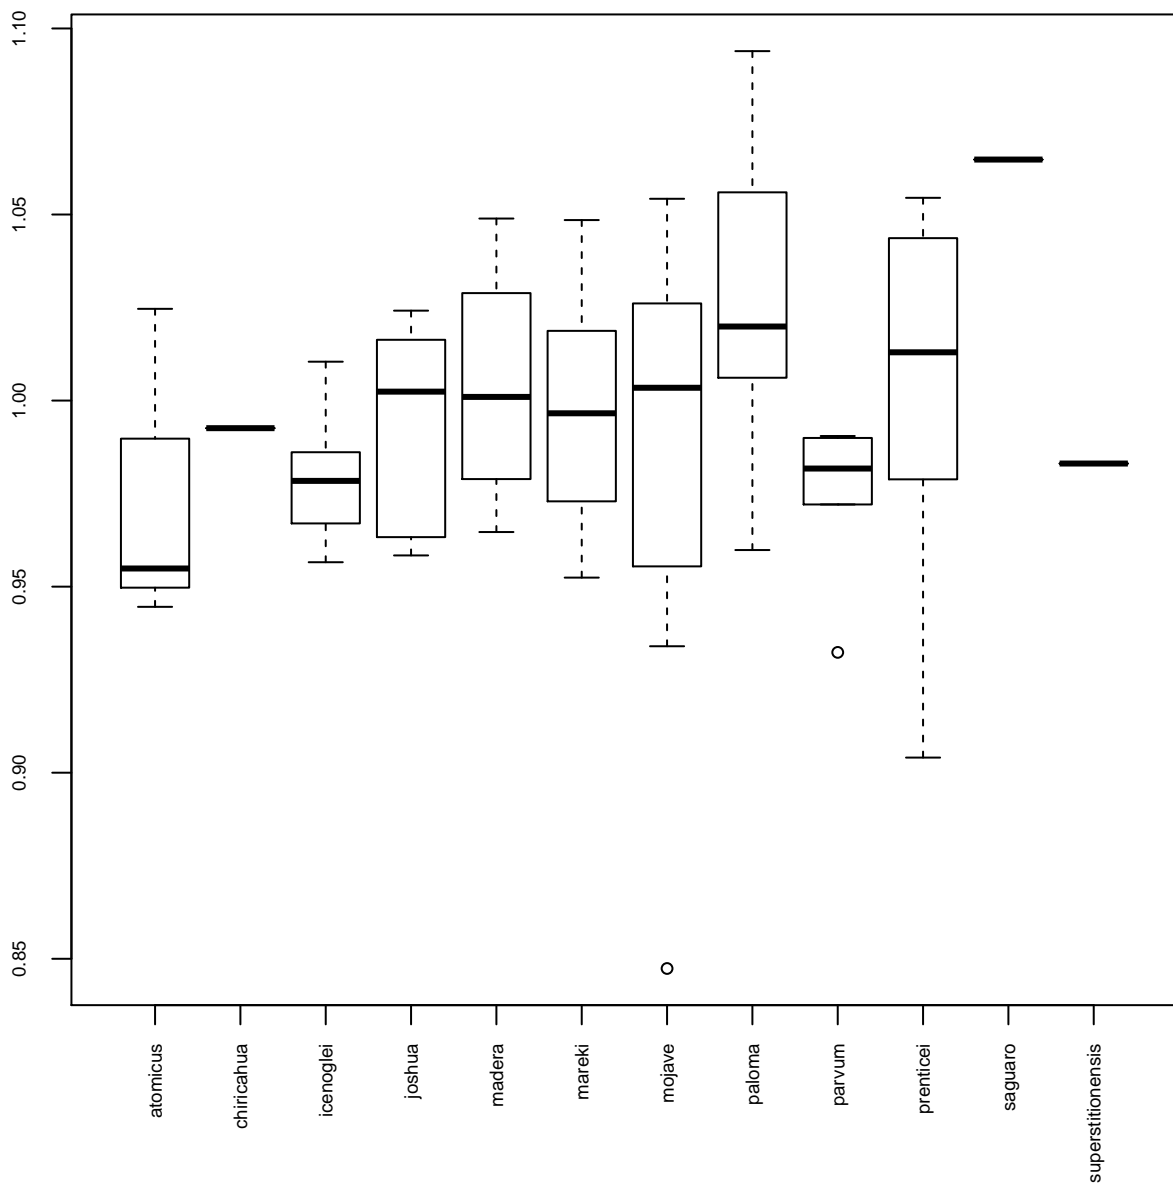

Supplement: Supplementary file 894

## Tarsus 1/Femur 3 Length ratio – males

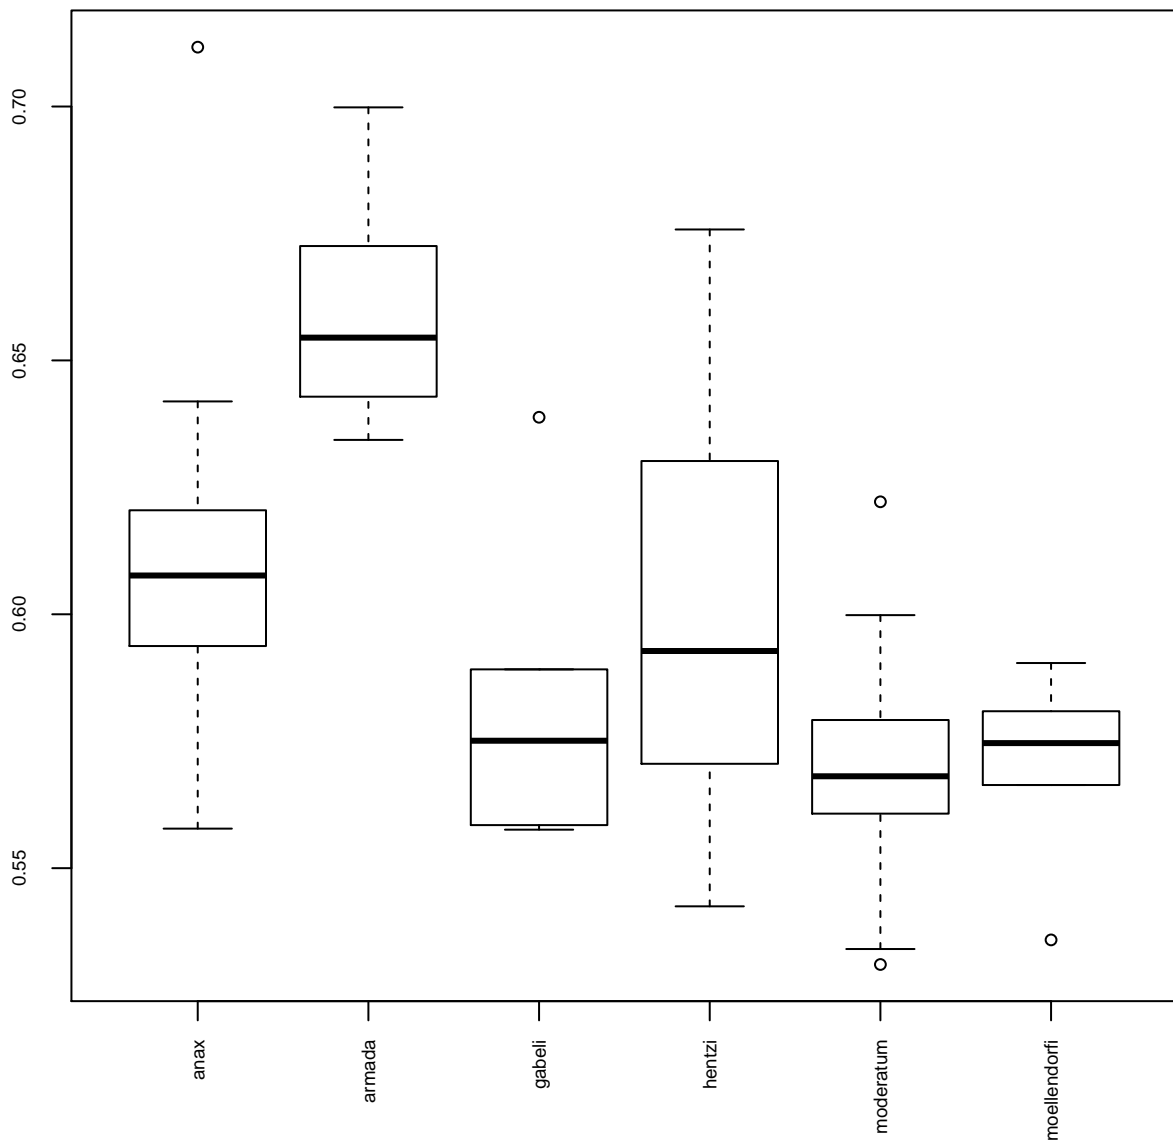

Supplement: Supplementary file 895

## Carapace Length – females

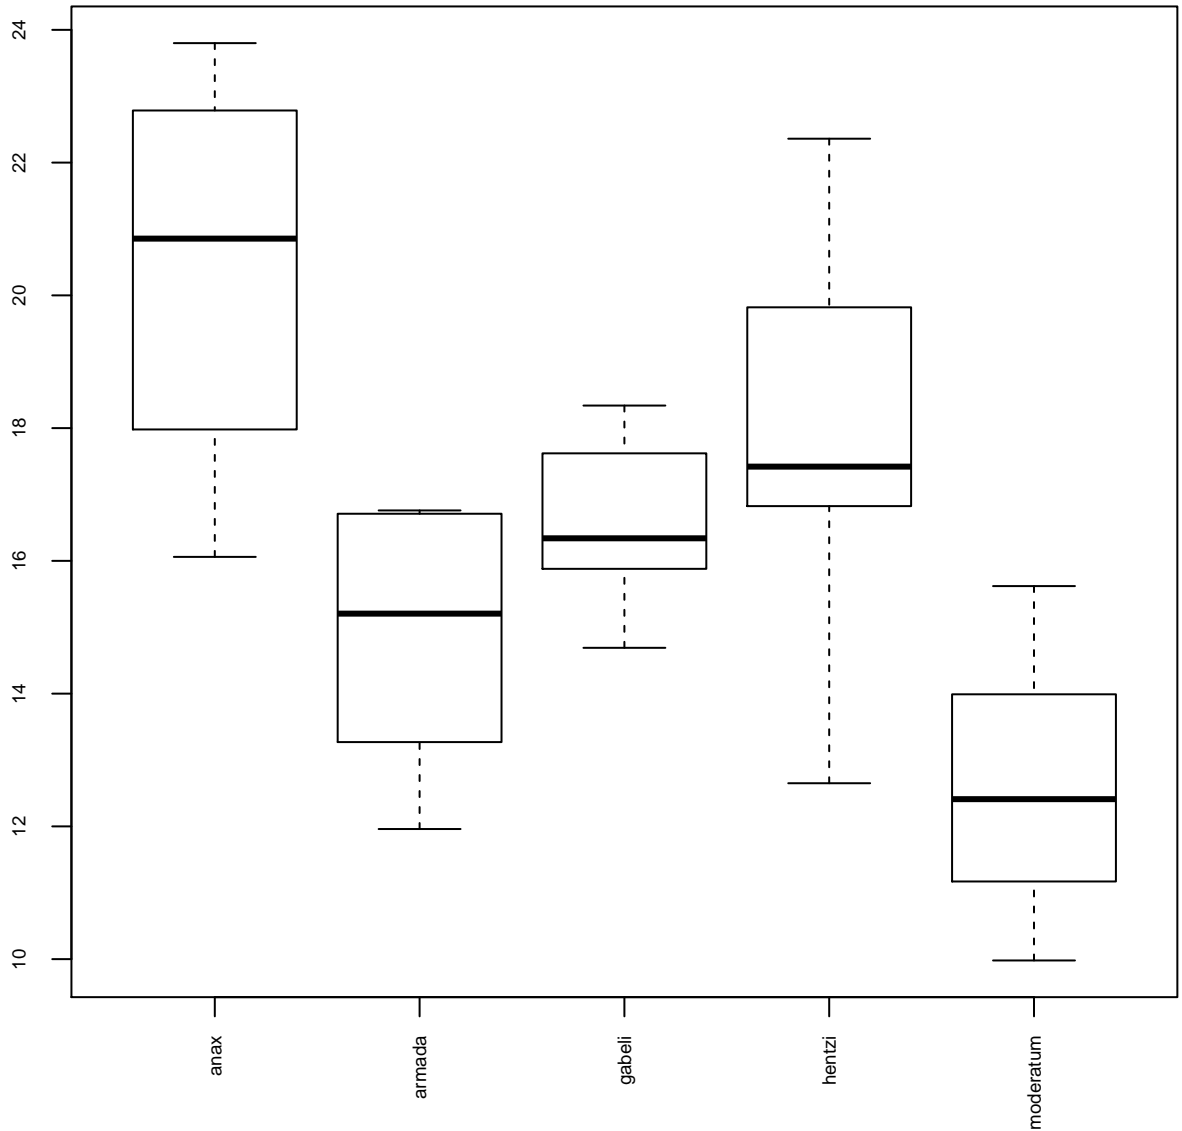

Supplement: Supplementary file 896

## Carapace Length/Palpal Tibia Length ratio – males

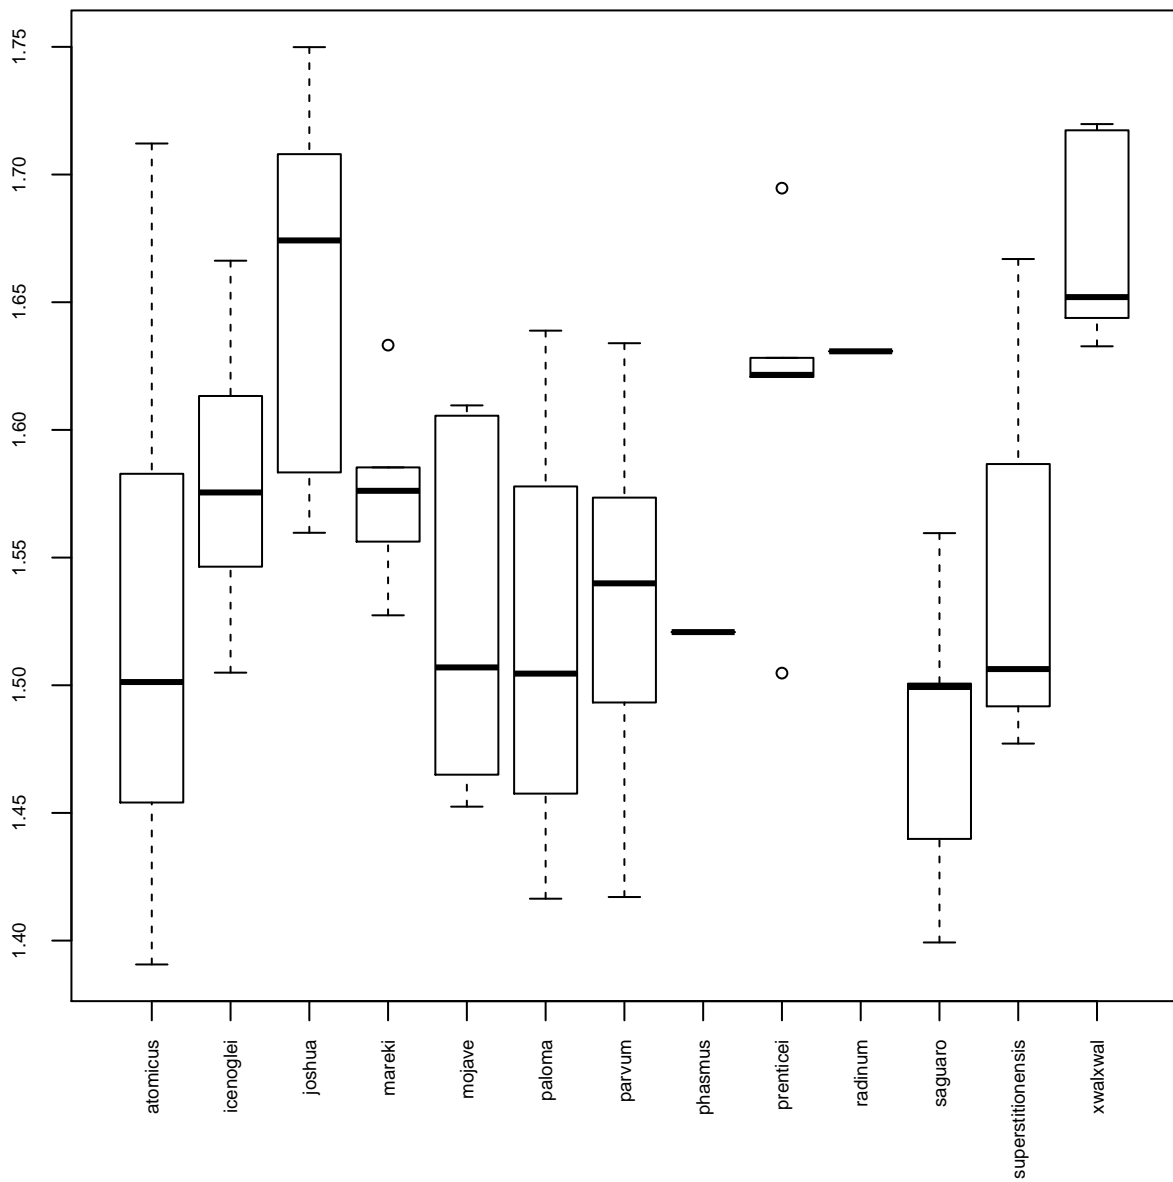

Supplement: Supplementary file 897

## Carapace Length/Tibia 3 ratio – males

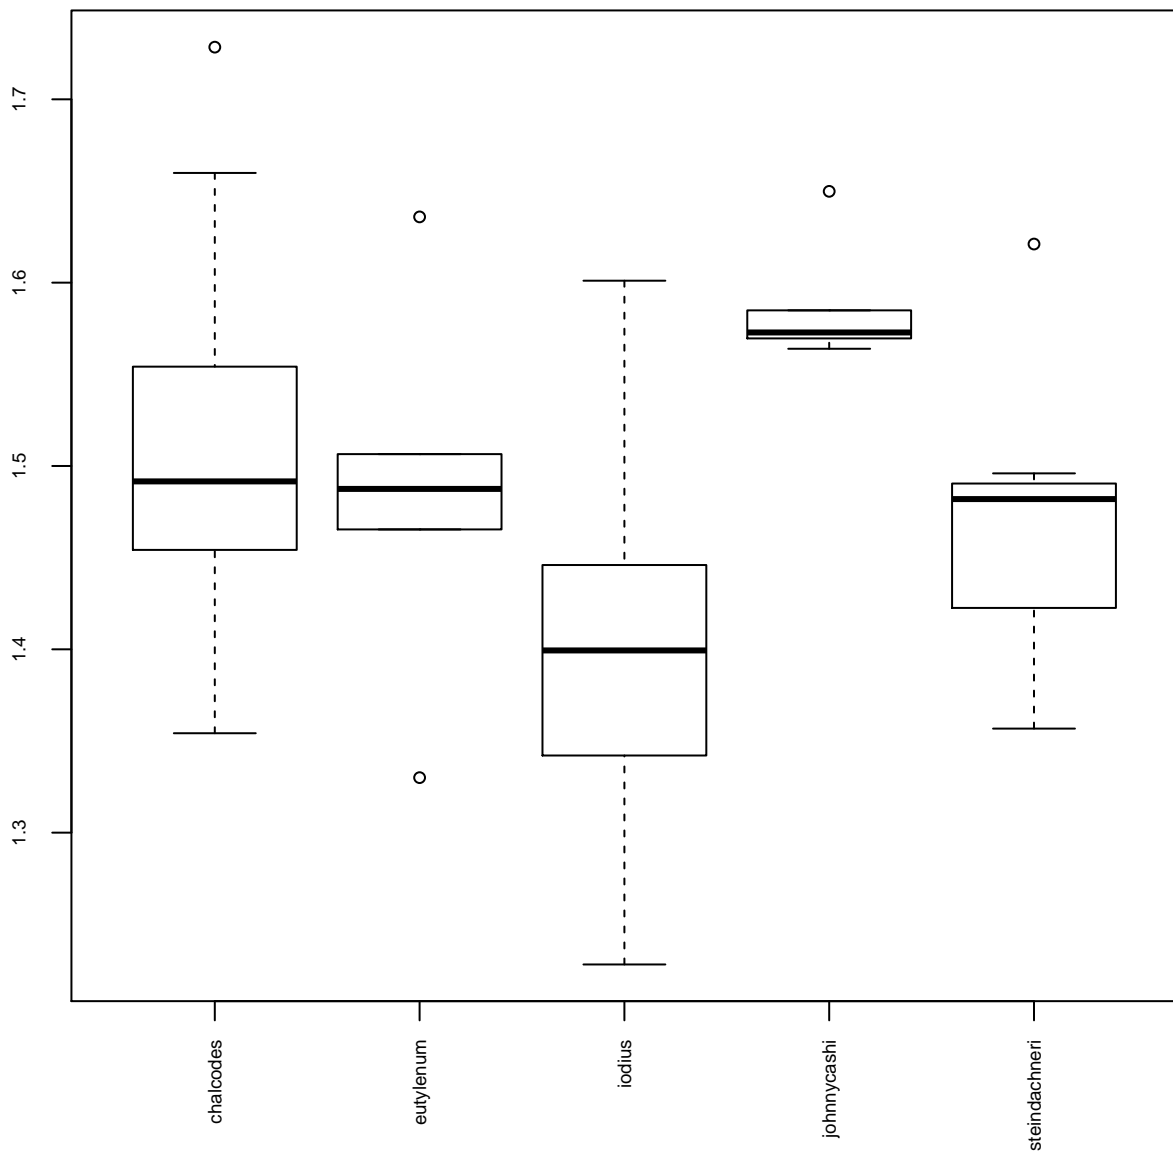

Supplement: Supplementary file 898

# Carapace Length/Metatarsus 4 ratio – males

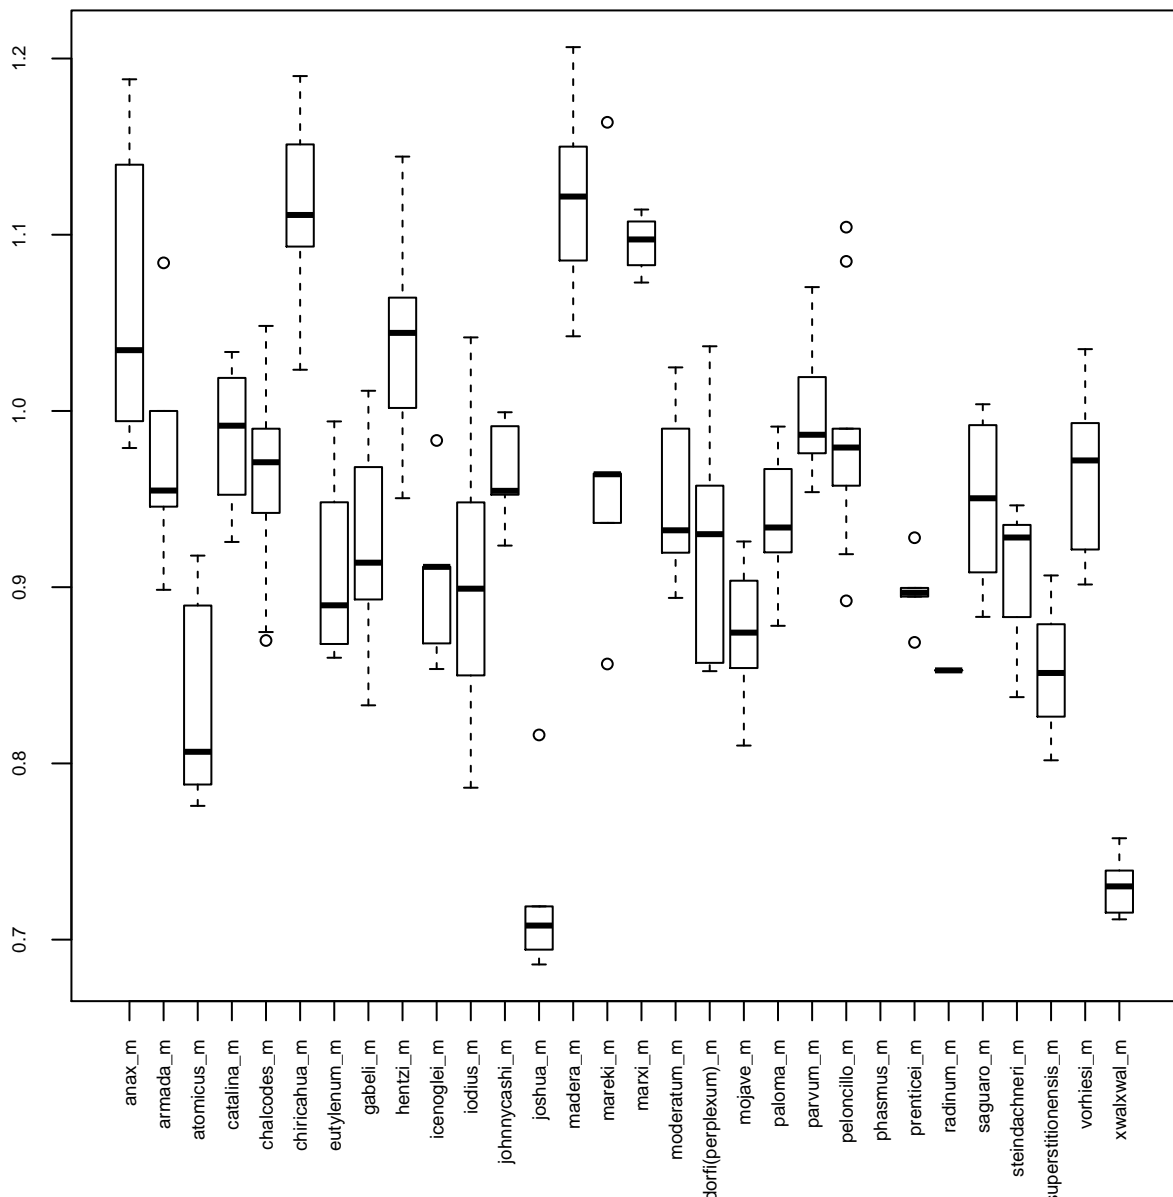

Supplement: Supplementary file 899

## Tarsus 1/Metatarsus 4 Length ratio – females

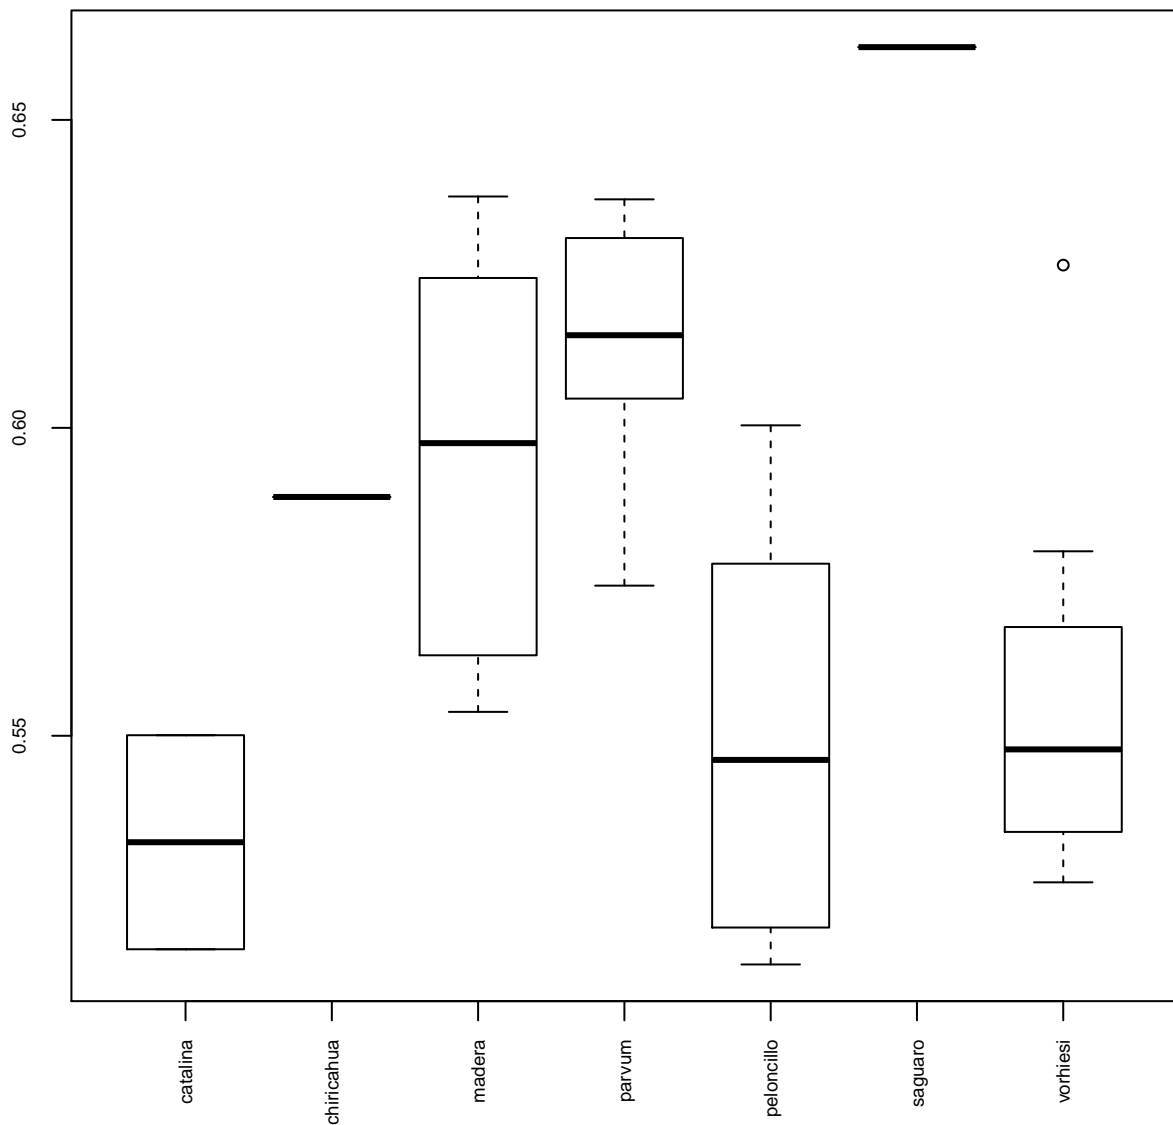

Supplement: Supplementary file 900
