# Supplementary material (part 10 of 15)
Source: publisher site journal article supplement (http://zookeys.pensoft.net/article/6264/download/suppl/32/)

# Patella 1/Metatarsus 4 Length ratio – females

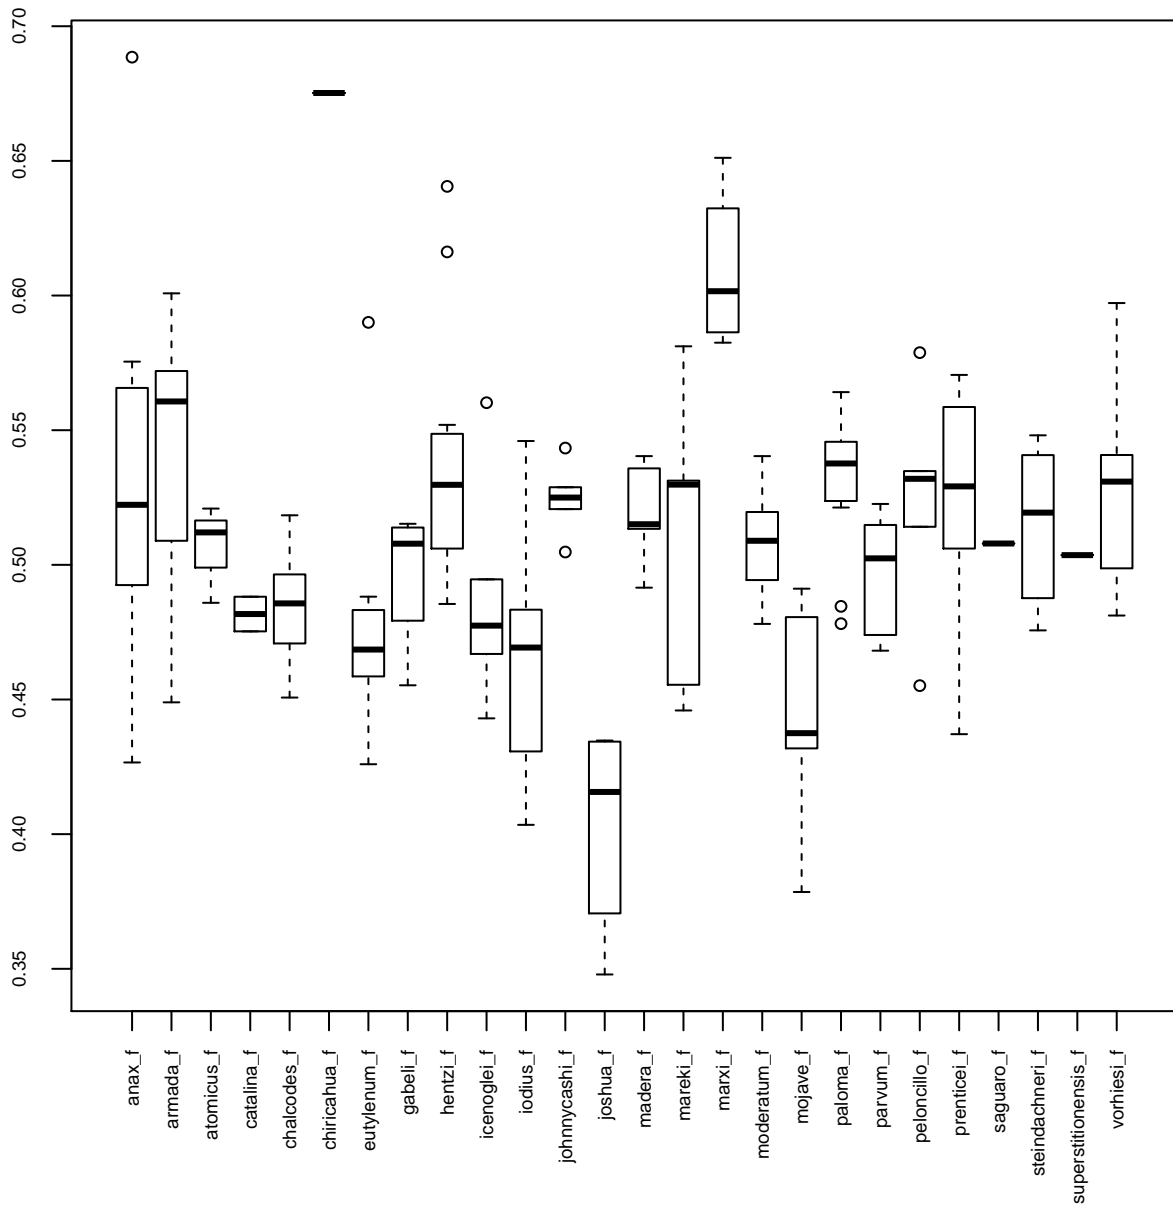

Supplement: Supplementary file 901

## Tarsus 1/Tibia 4 Length ratio – females

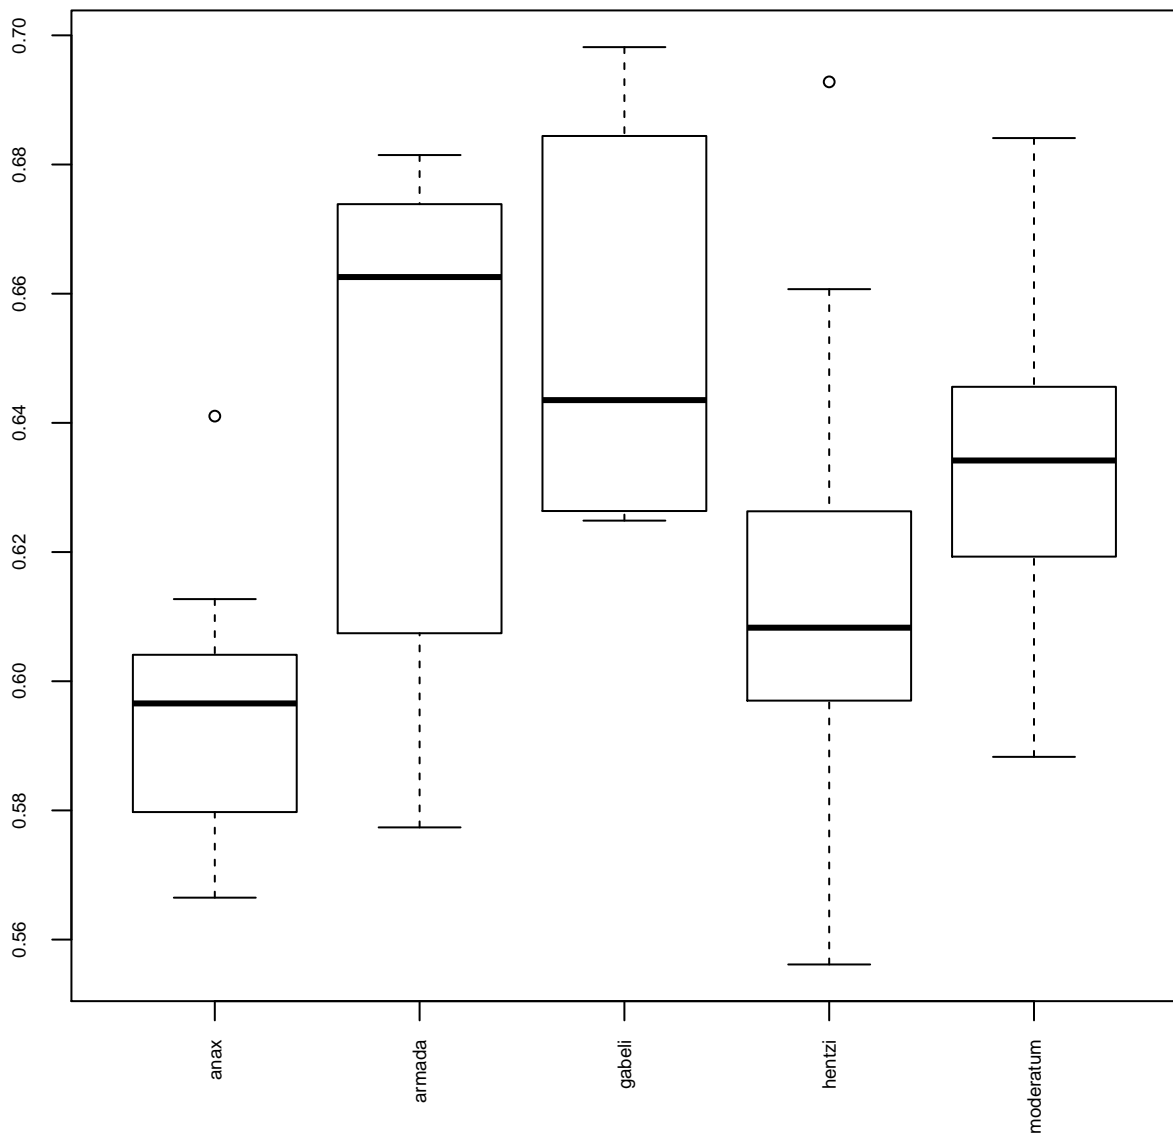

Supplement: Supplementary file 902

## Patella 1/Tarsus 3 Length ratio – females

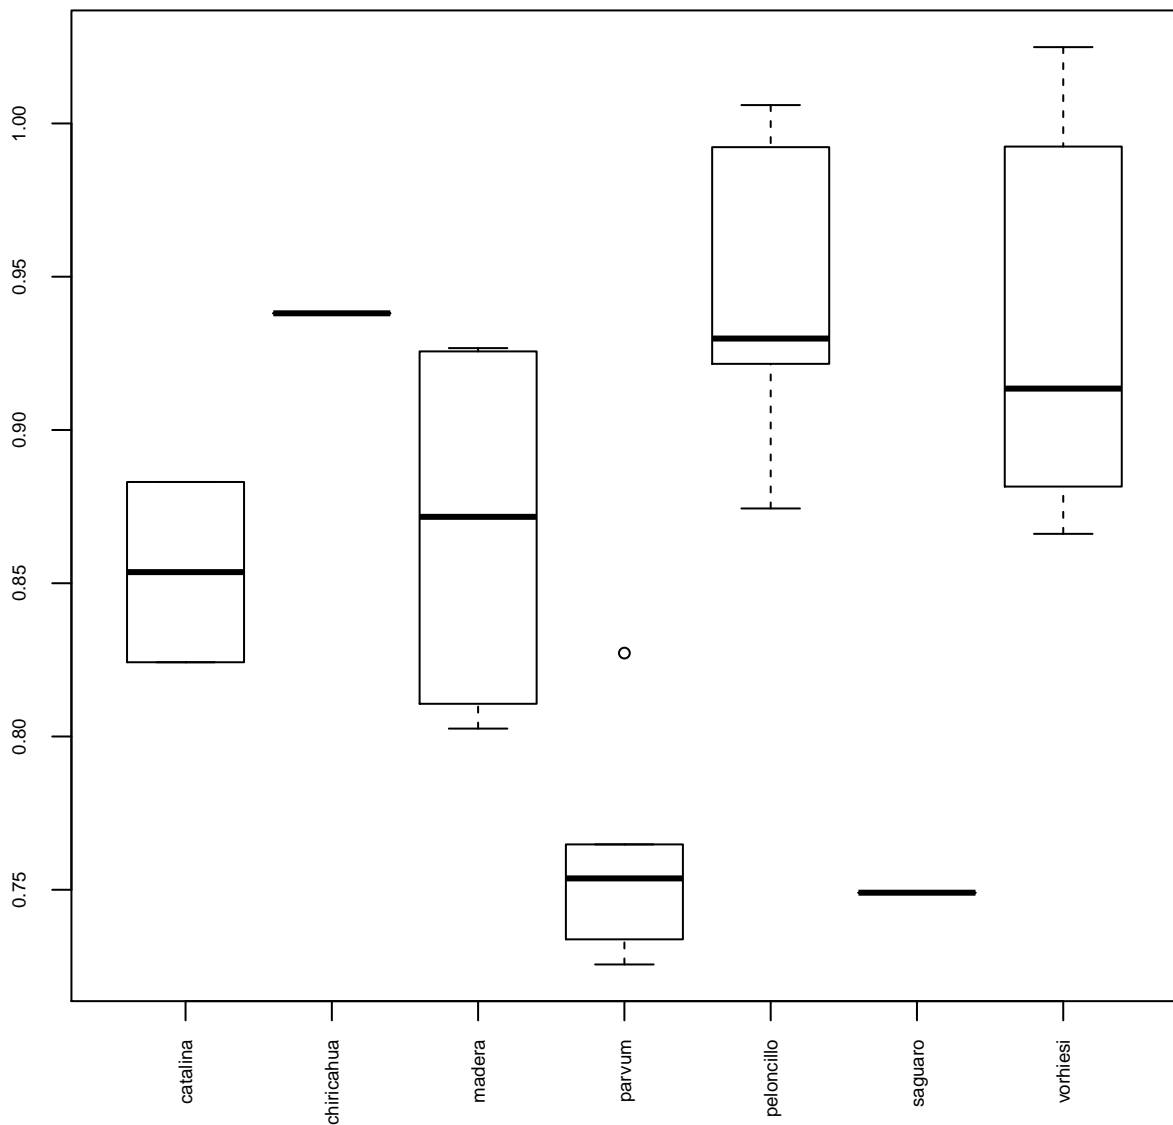

Supplement: Supplementary file 903

## Tarsus 3/Femur 4 Length ratio – males

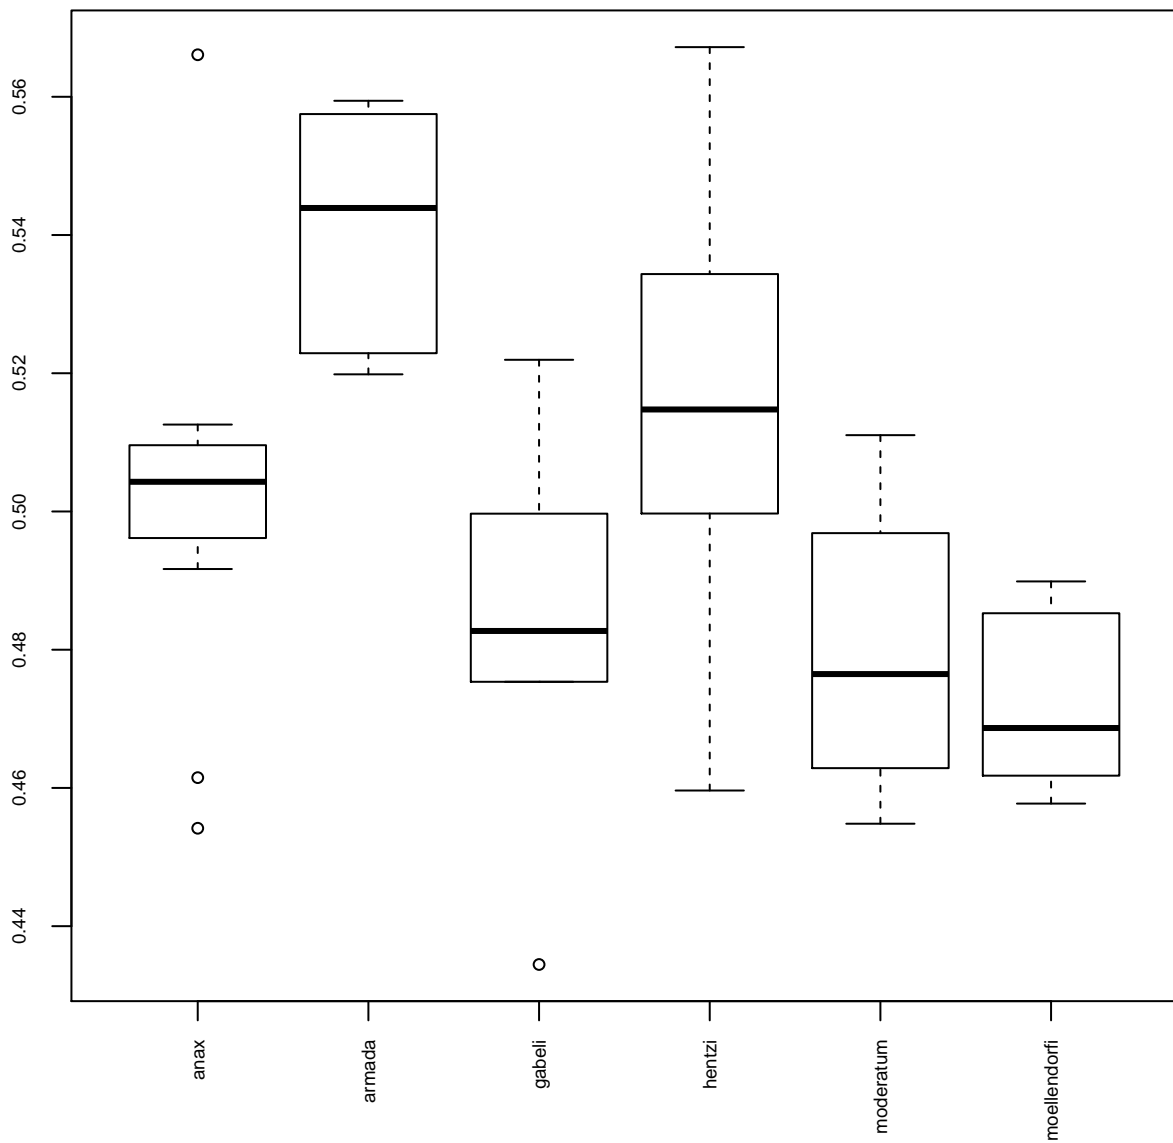

Supplement: Supplementary file 904

# Femur 1/Metatarsus 4 ratio – females

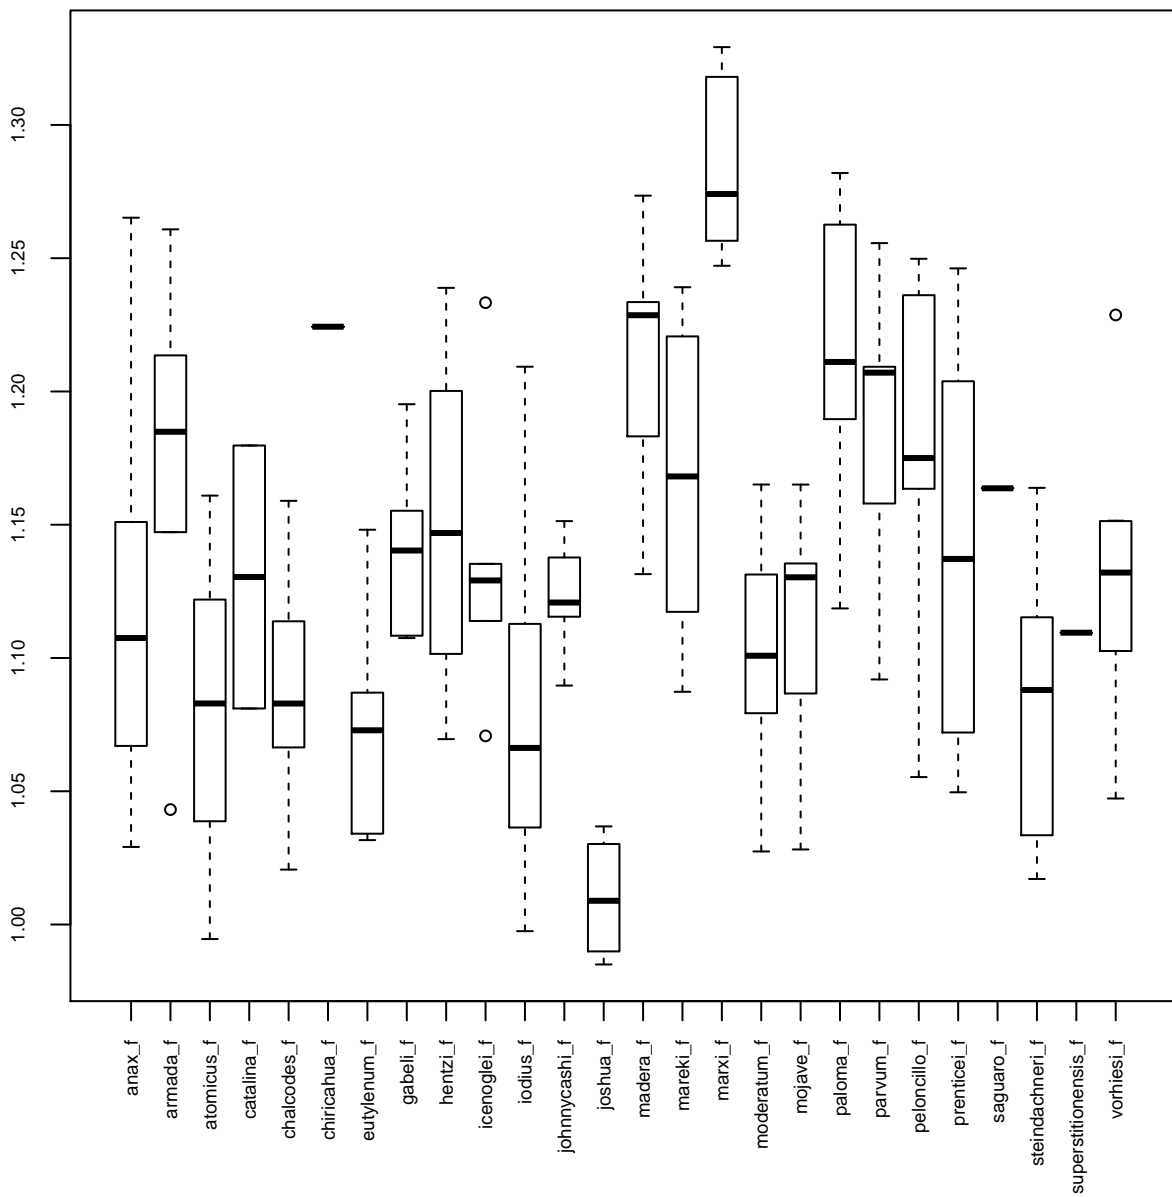

Supplement: Supplementary file 905

## Tibia 1/Femur 4 Length ratio – females

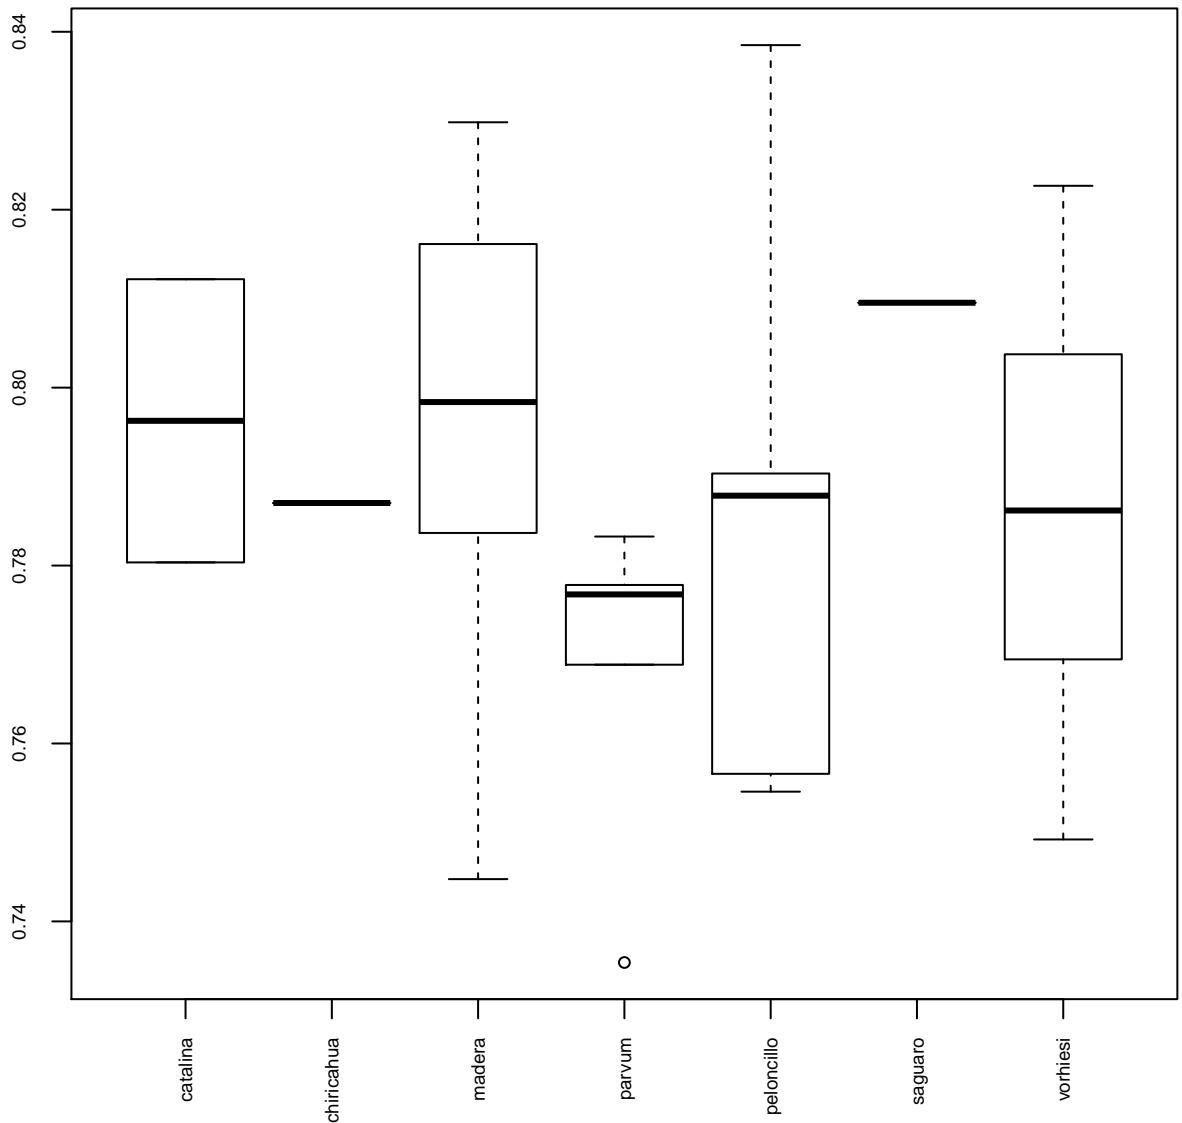

Supplement: Supplementary file 906

# Carapace Length/Tibia 3 ratio – females

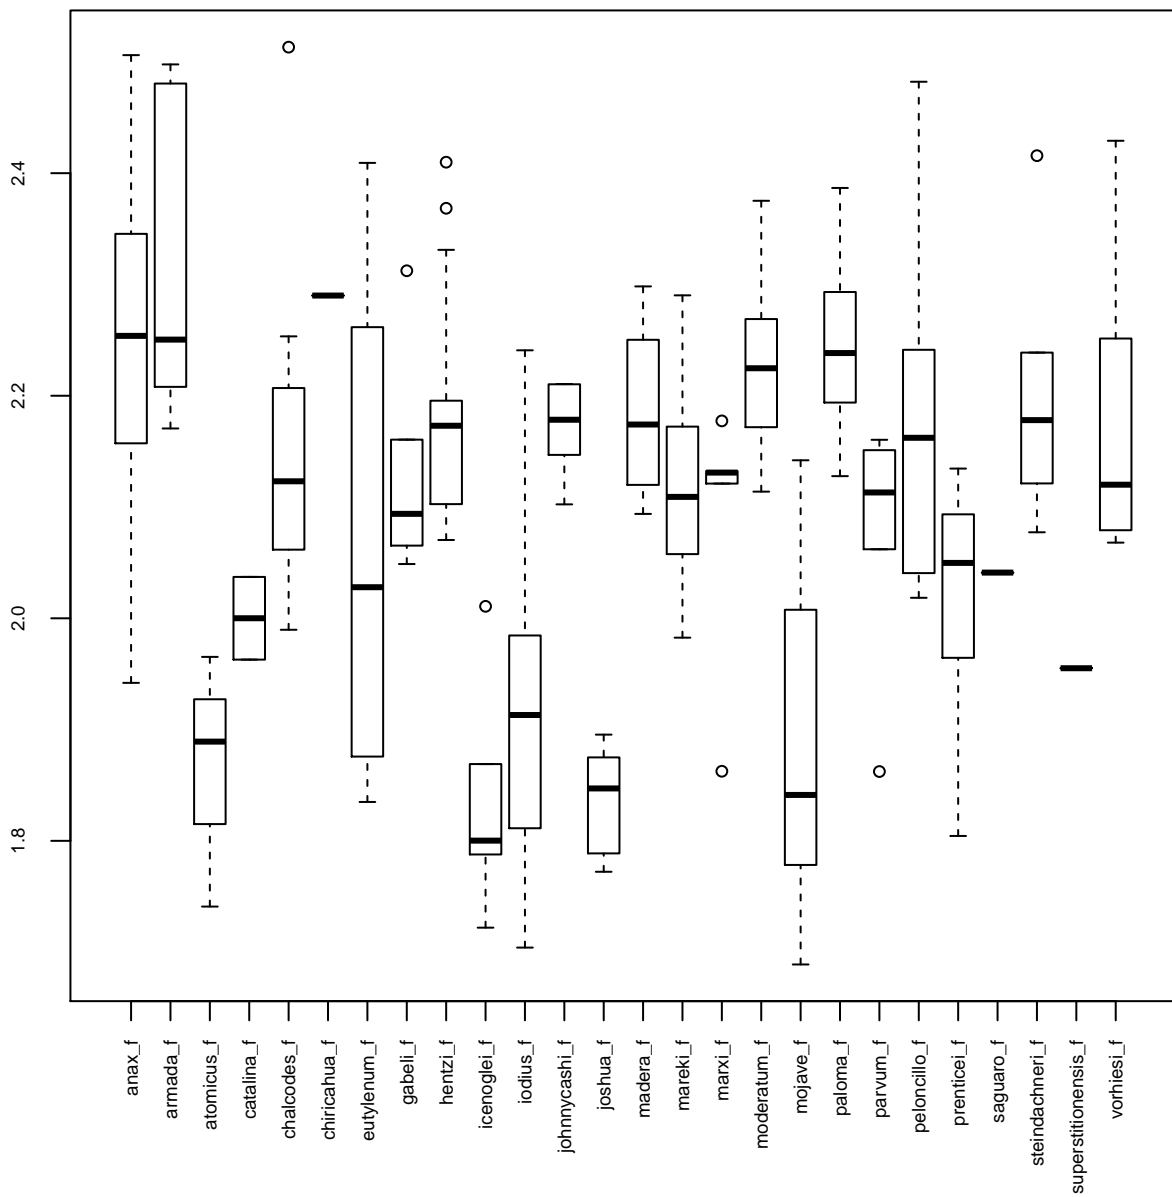

Supplement: Supplementary file 907

## Femur 1/Tarsus 3 ratio – males

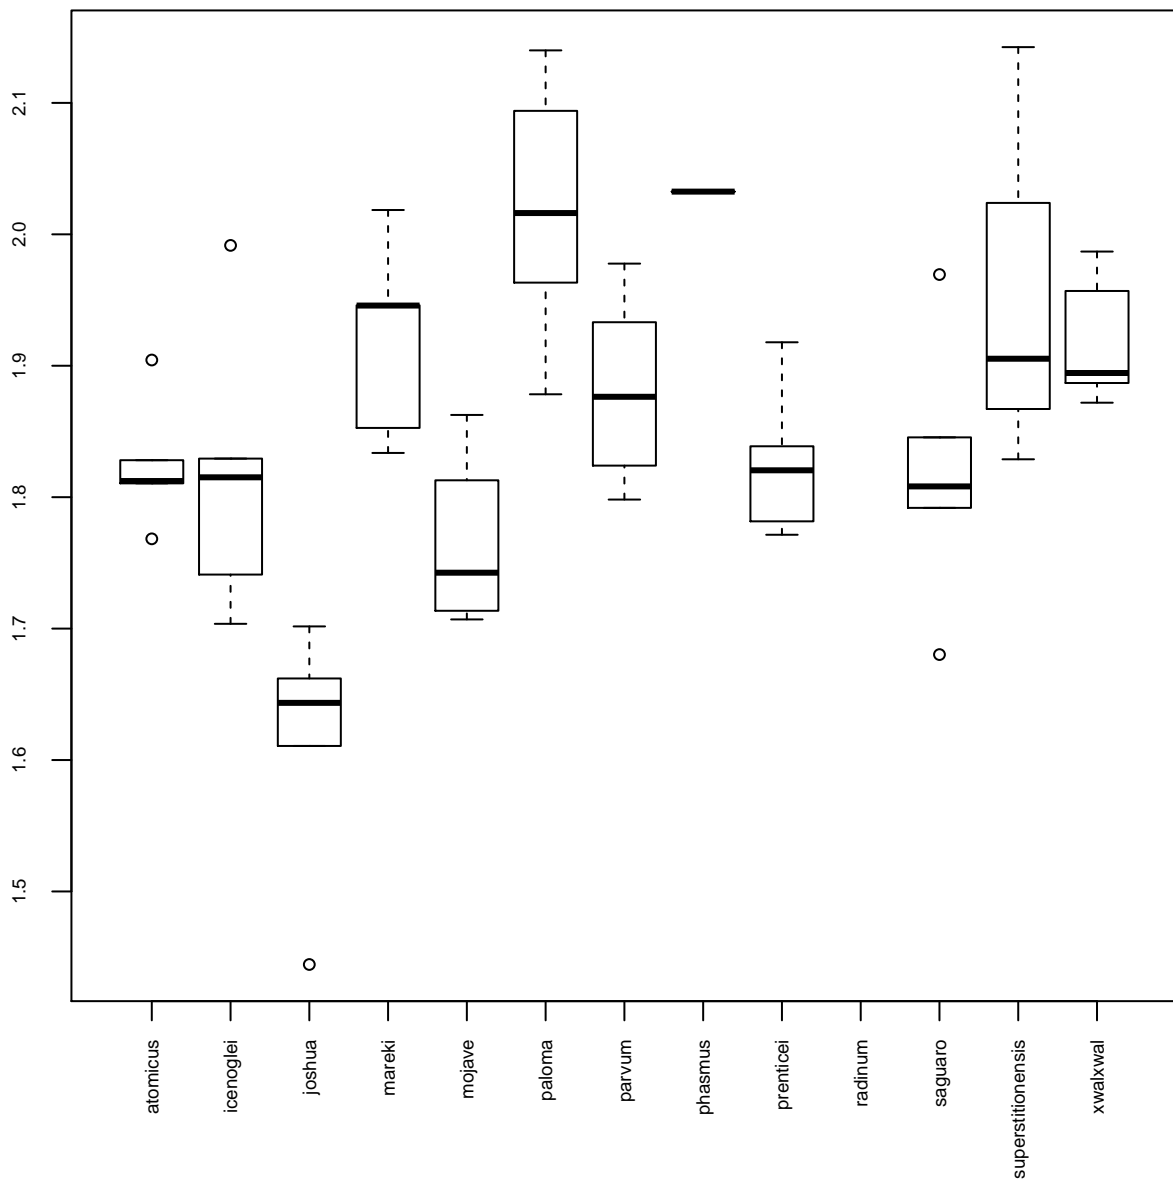

Supplement: Supplementary file 908

## Carapace Length/Tibia 1 ratio – males

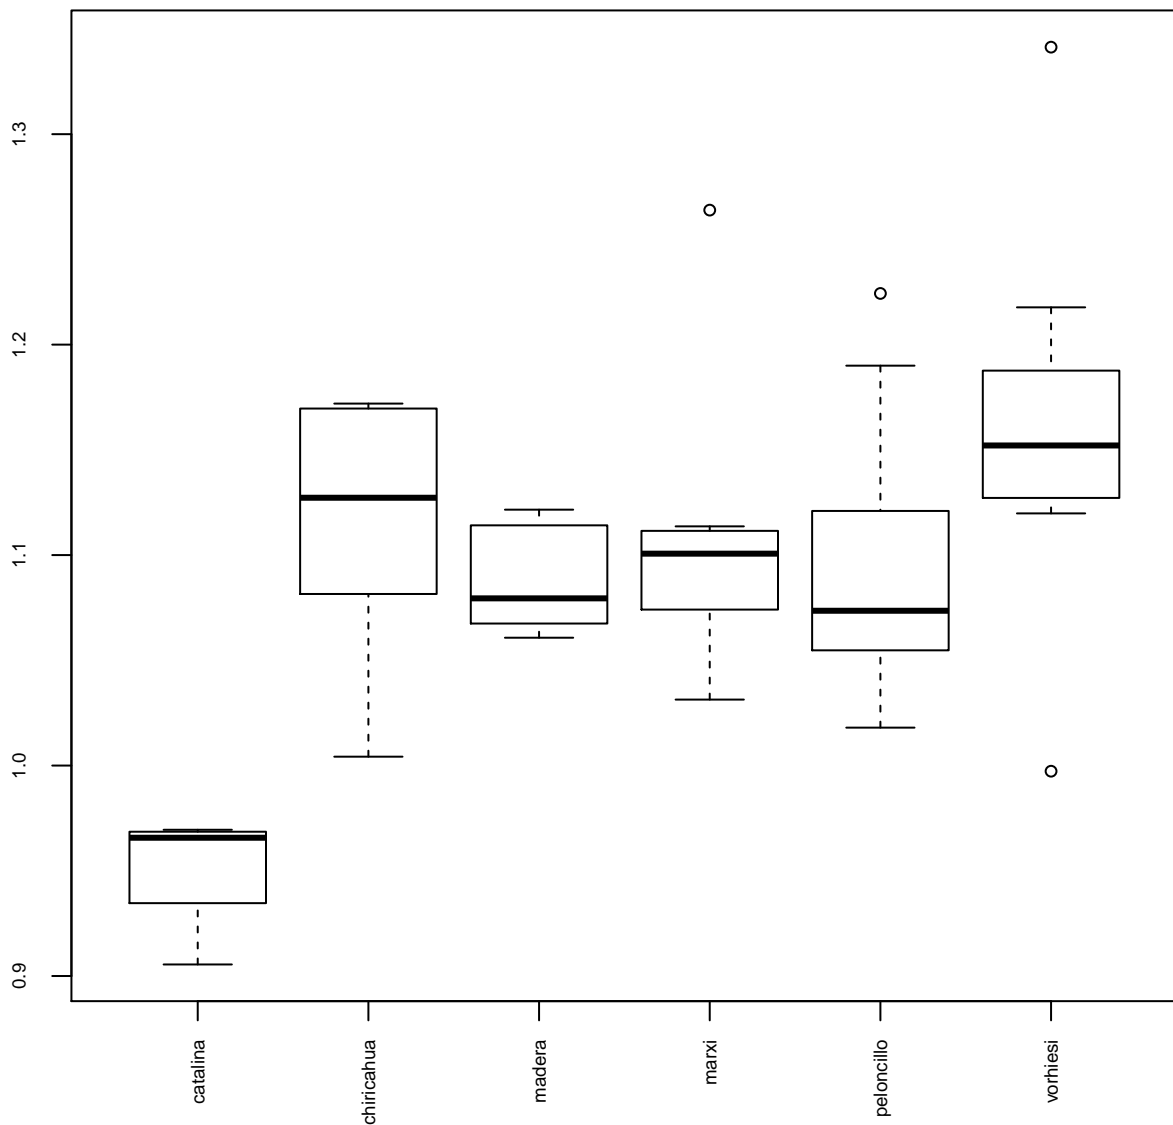

Supplement: Supplementary file 909

## Carapace Length/Tibia 1 ratio – males

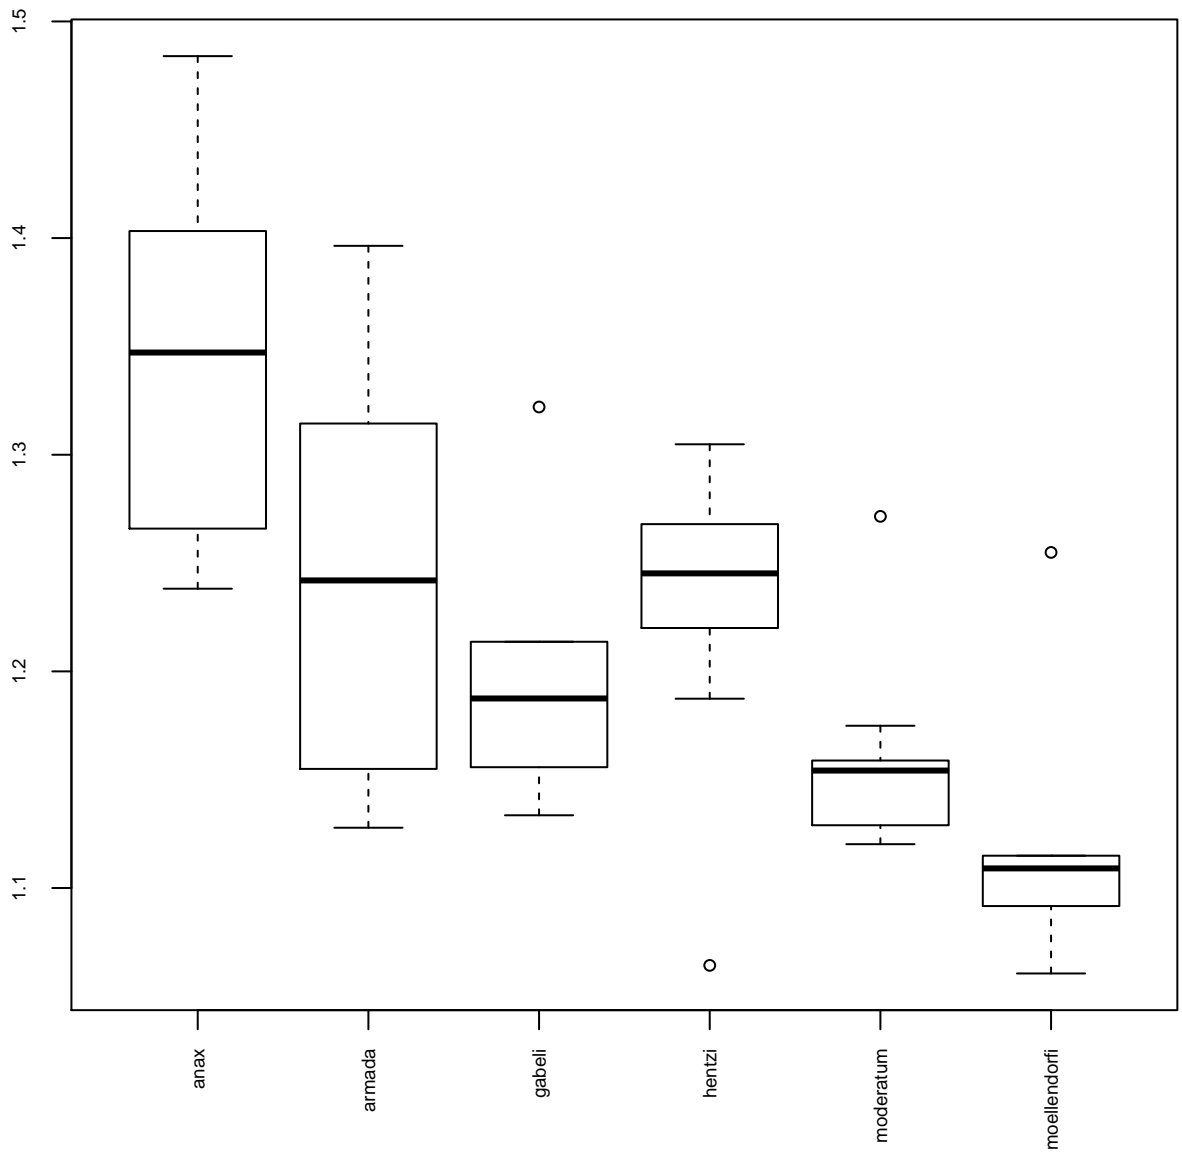

Supplement: Supplementary file 910

## Tibia 3/Metatarsus 3 ratio – males

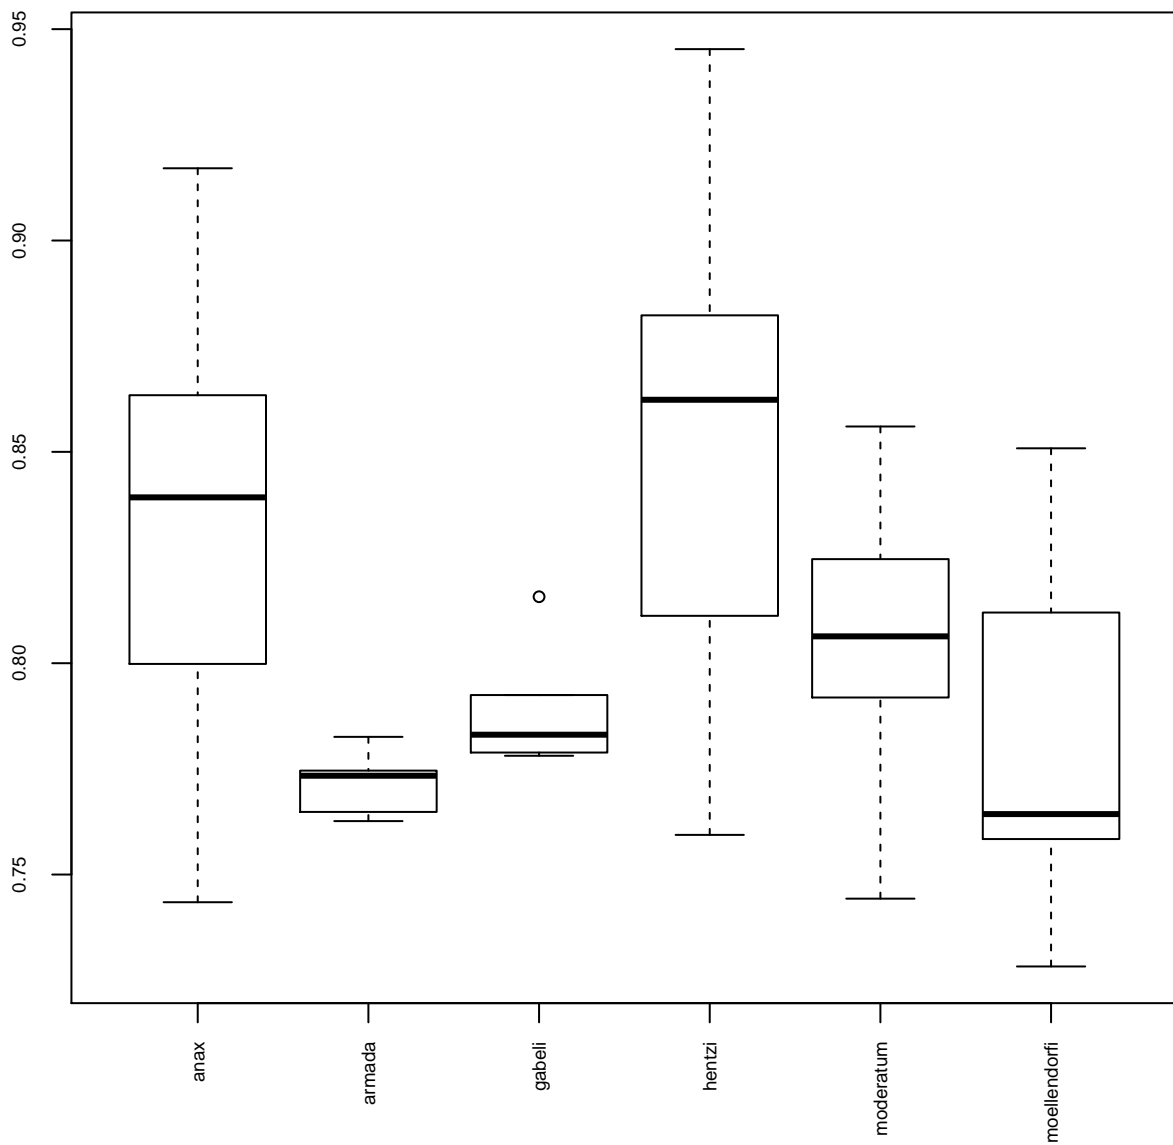

Supplement: Supplementary file 911

## Metatarsus 3/Tibia 4 Length ratio – females

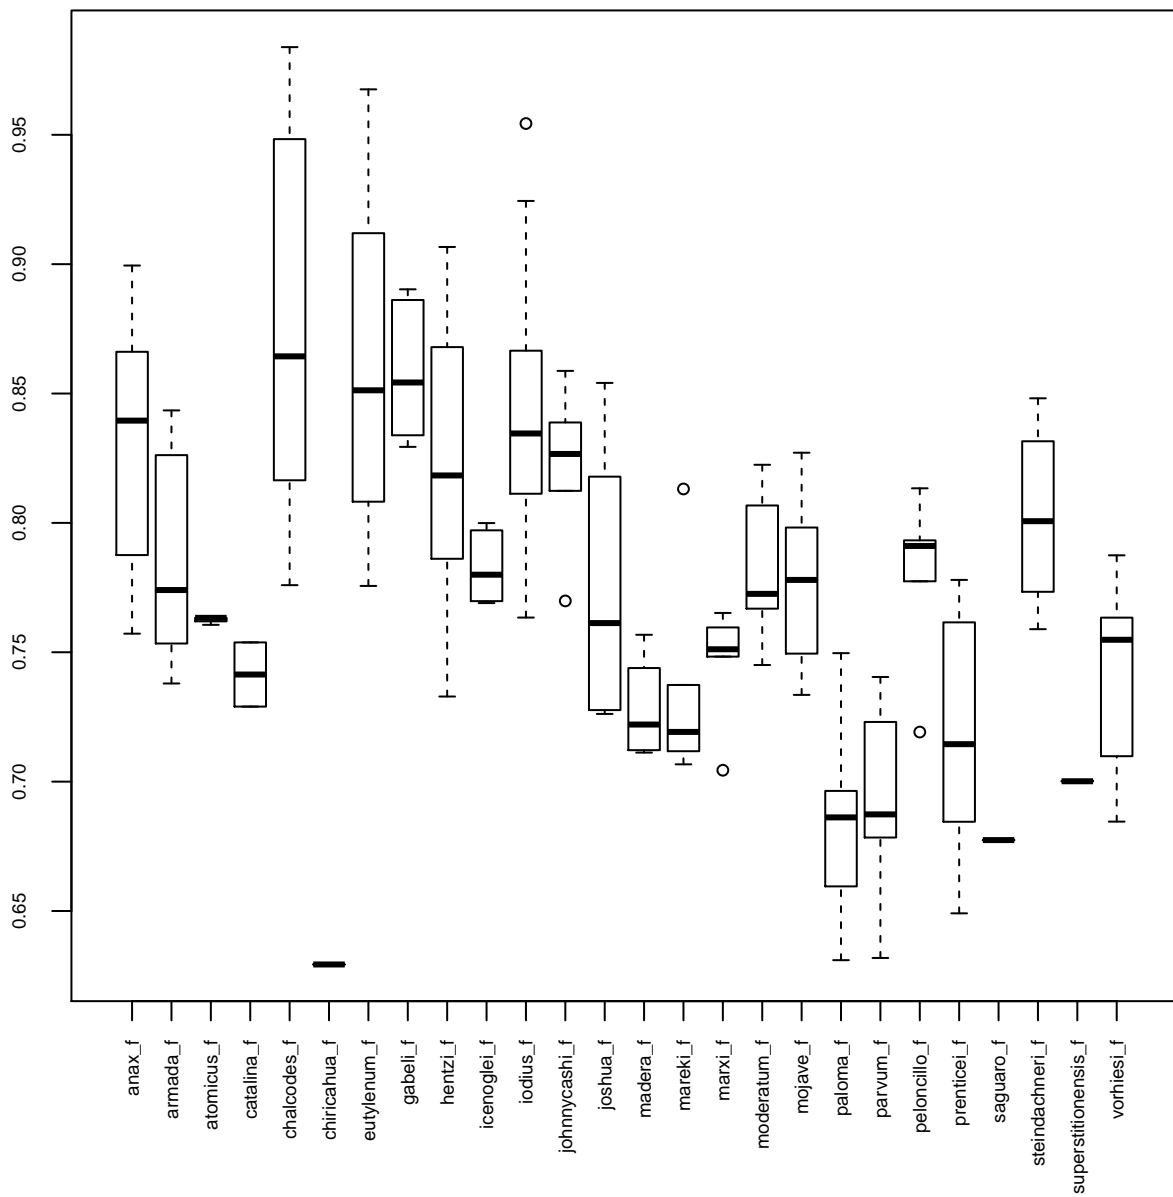

Supplement: Supplementary file 912

## Tarsus 1/Tibia 3 Length ratio – females

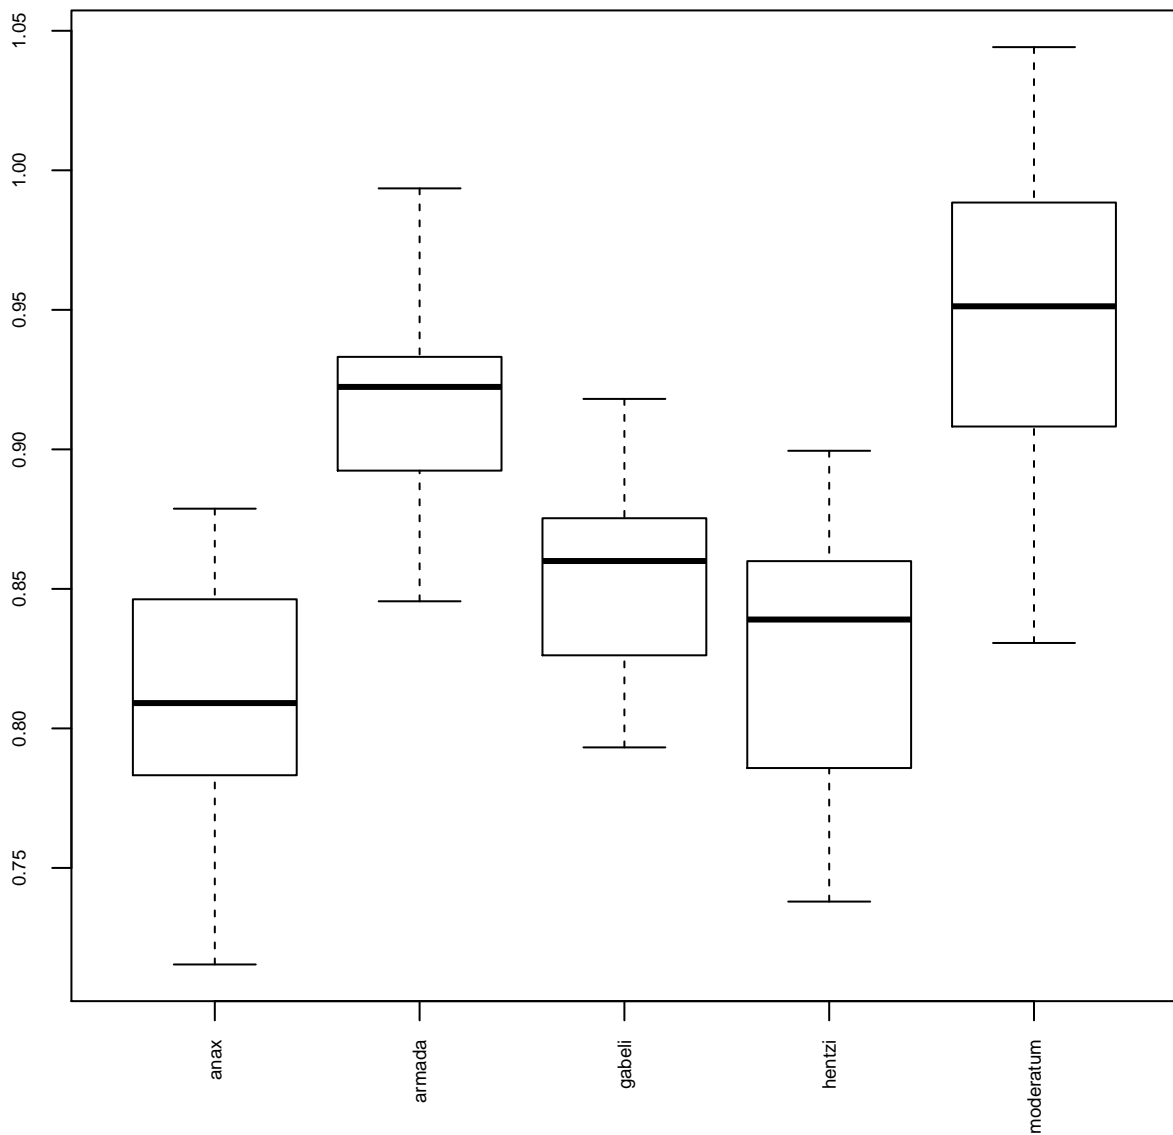

Supplement: Supplementary file 913

## Leg 1 Length – males

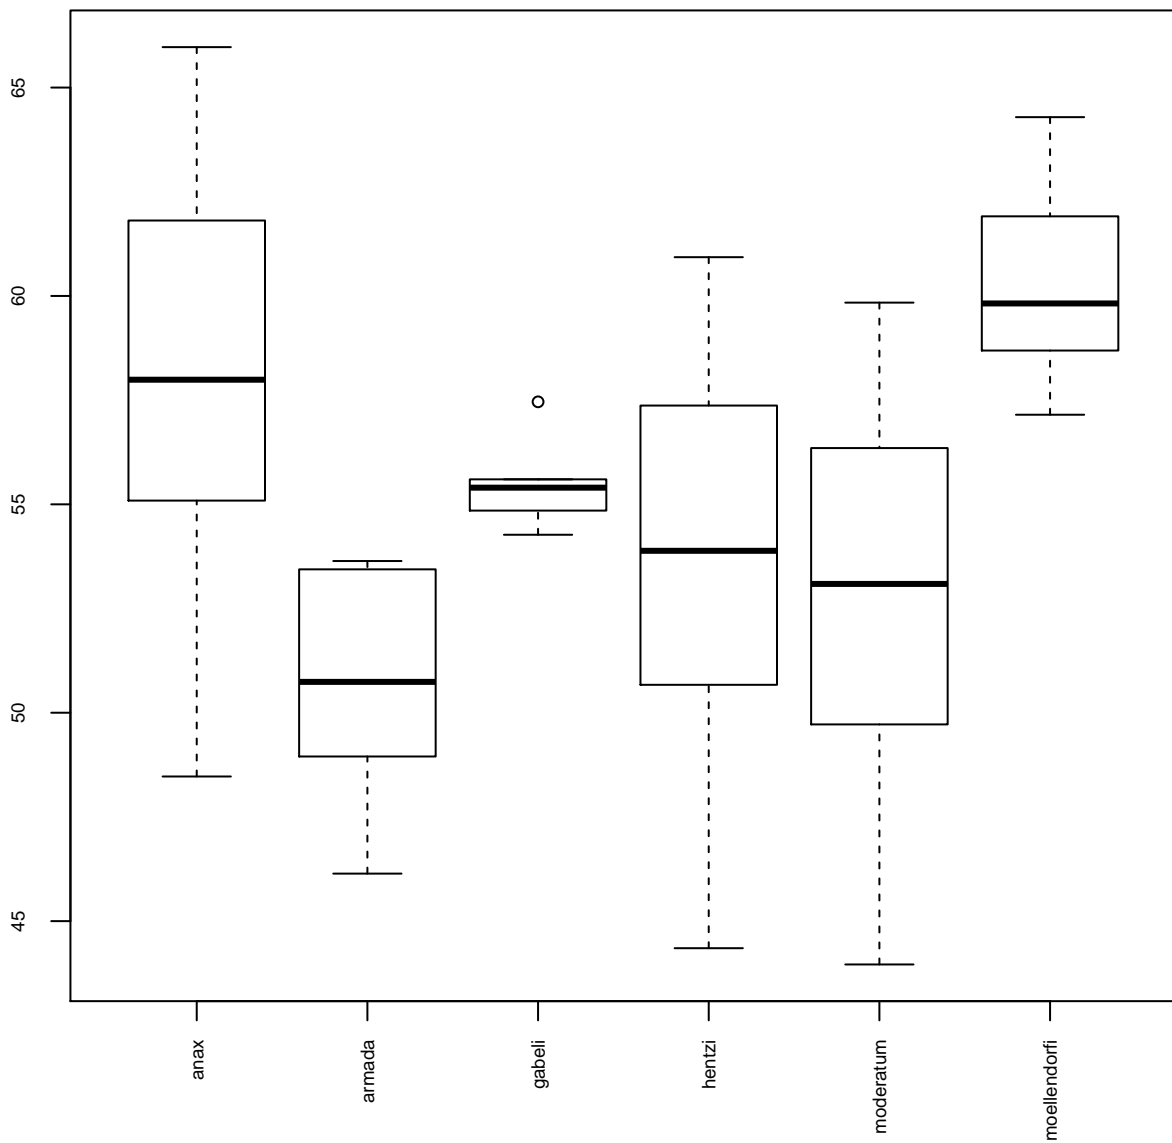

Supplement: Supplementary file 914

## Tibia 3/Tarsus 3 ratio – females

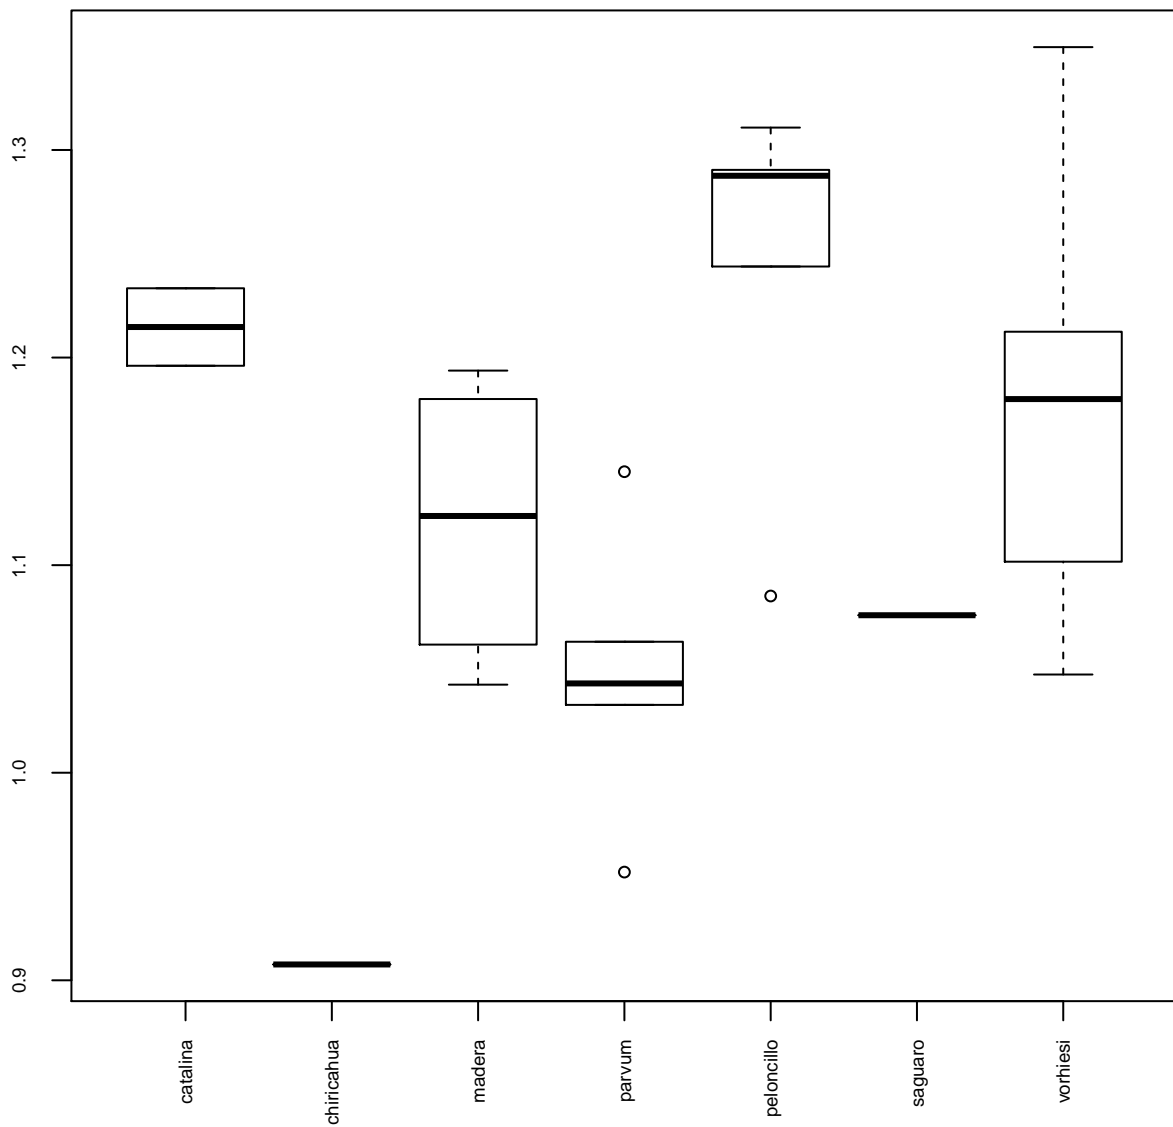

Supplement: Supplementary file 915

# Femur 1/Patella 1 ratio – males

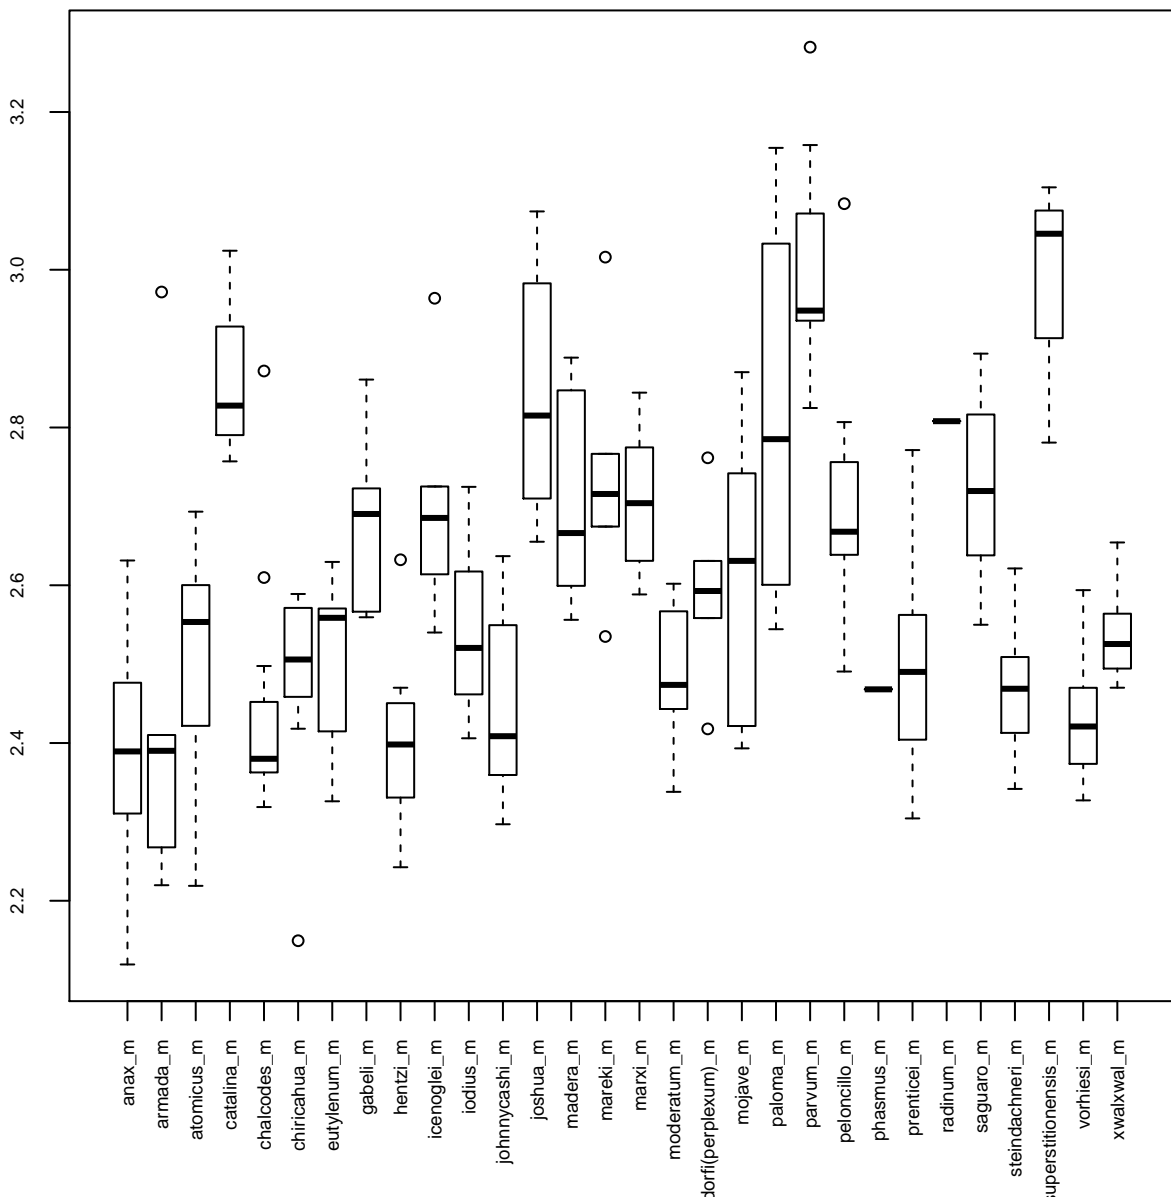

Supplement: Supplementary file 916

## Carapace Length/Patella 4 ratio – males

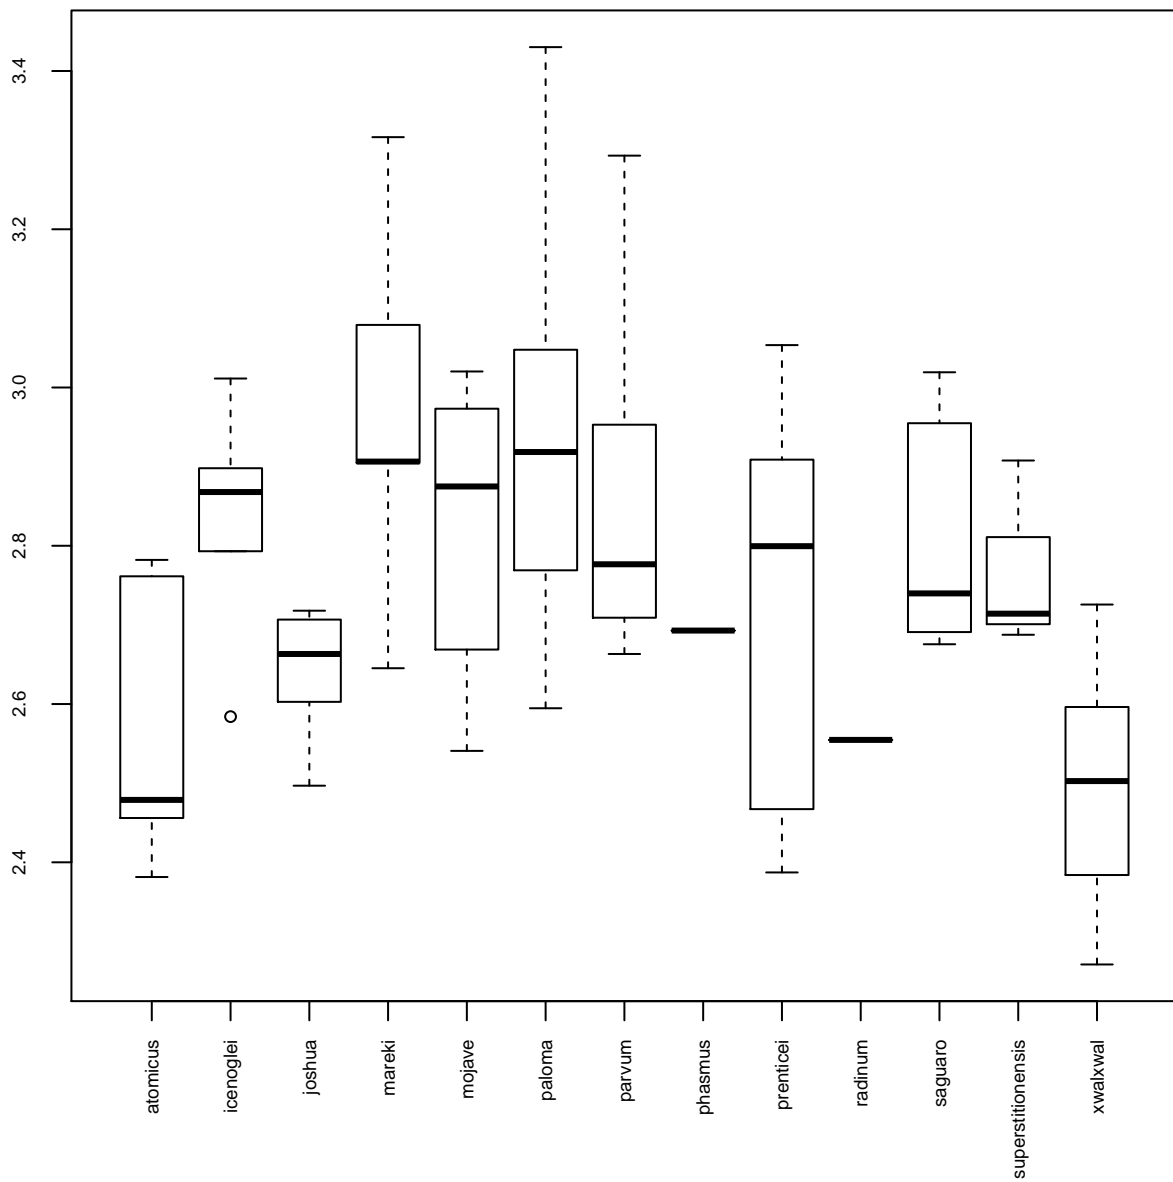

Supplement: Supplementary file 917

## Tarsus 1/Patella 3 Length ratio – males

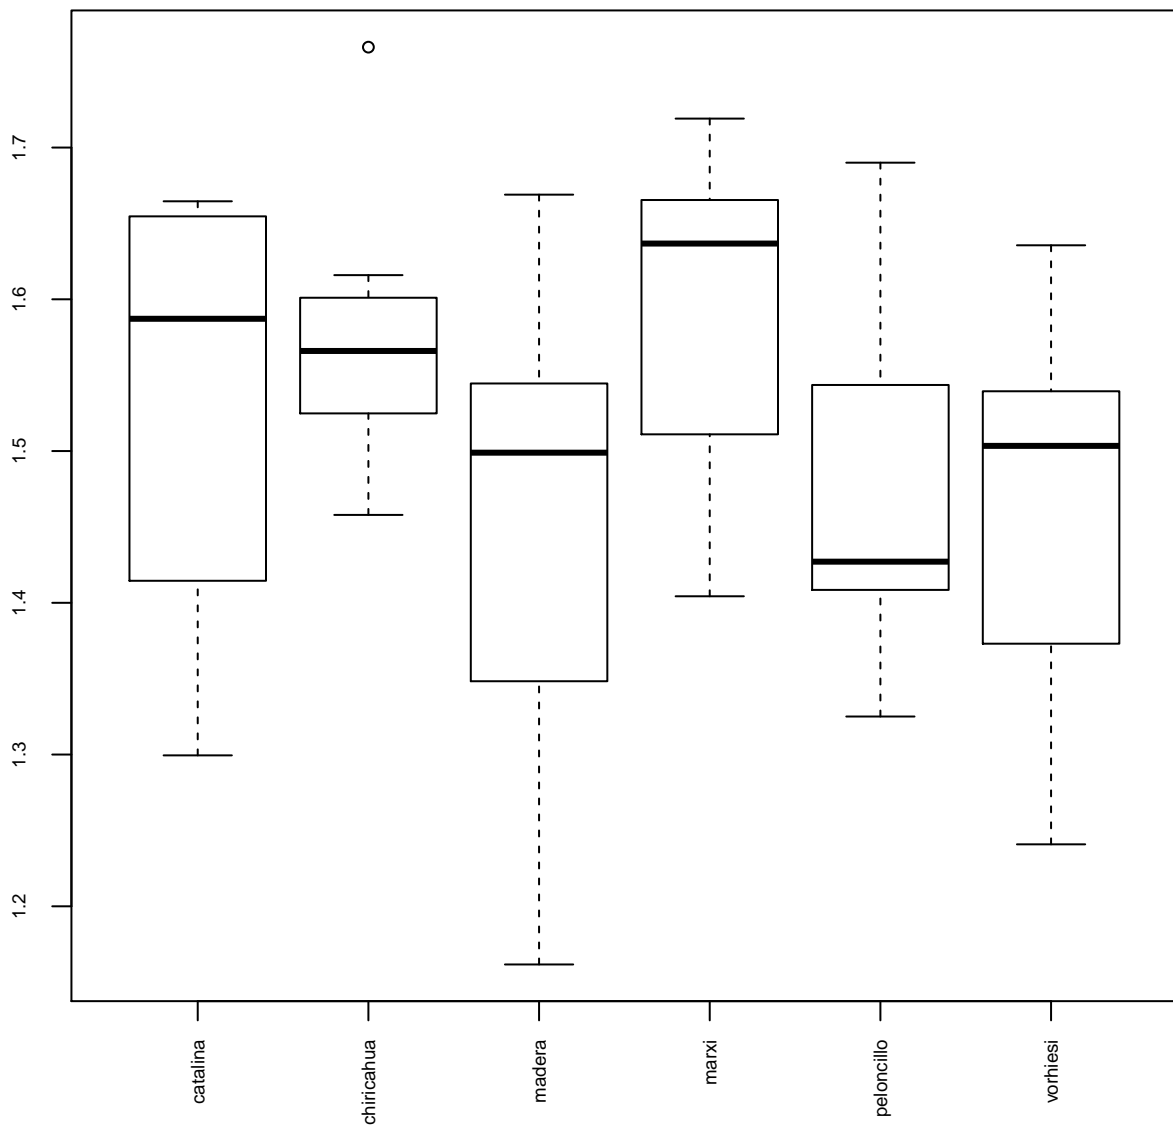

Supplement: Supplementary file 918

# Patella 3/Metatarsus 4 Length ratio – females

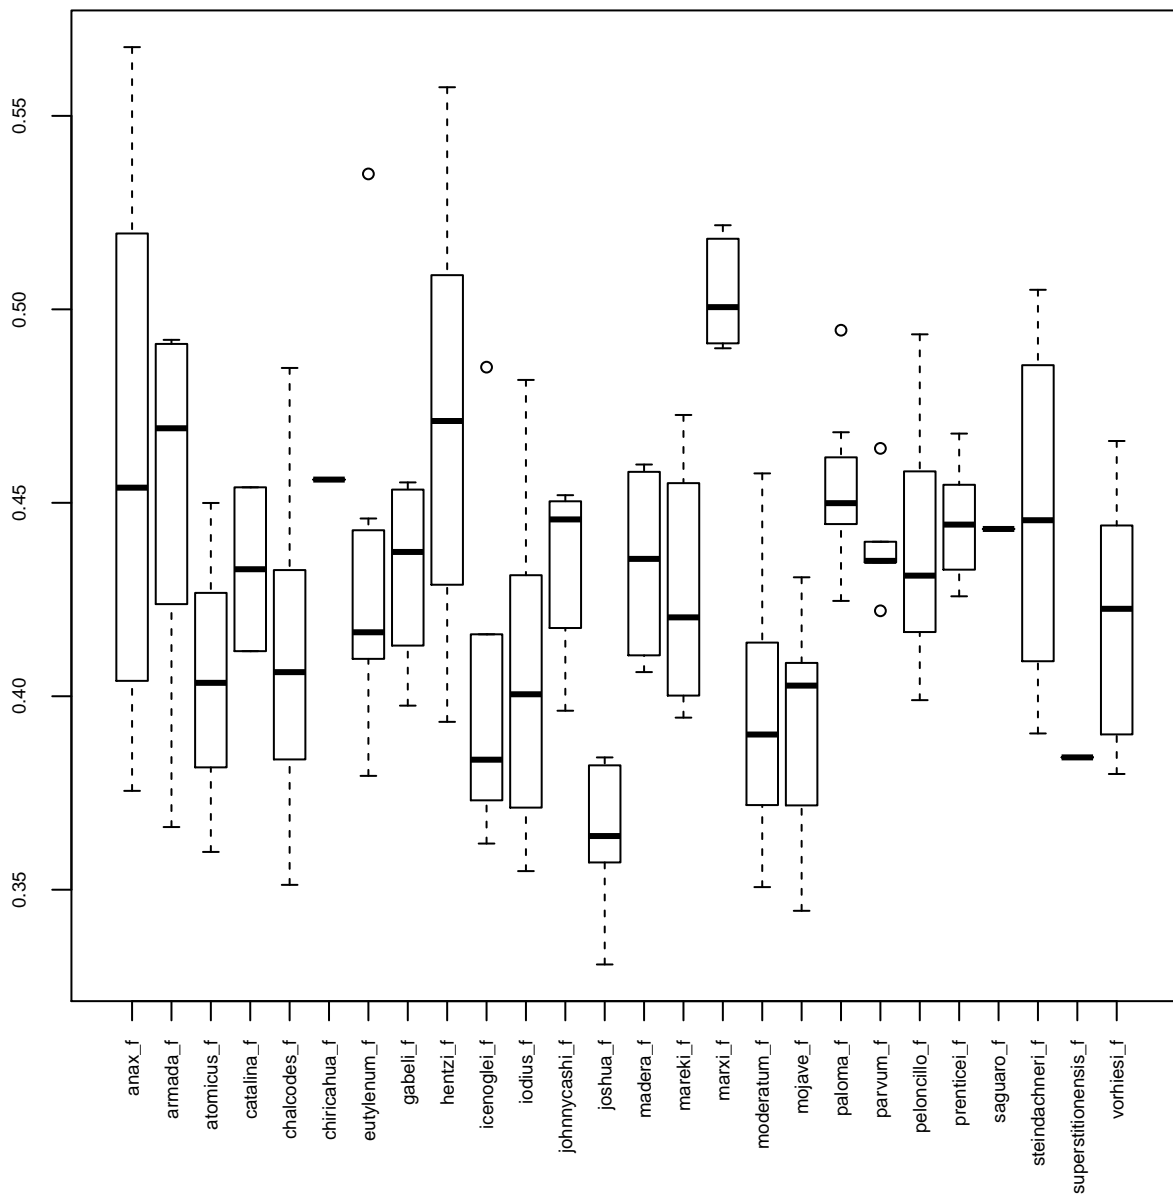

Supplement: Supplementary file 919

## Tarsus 3/Metatarsus 4 Length ratio – females

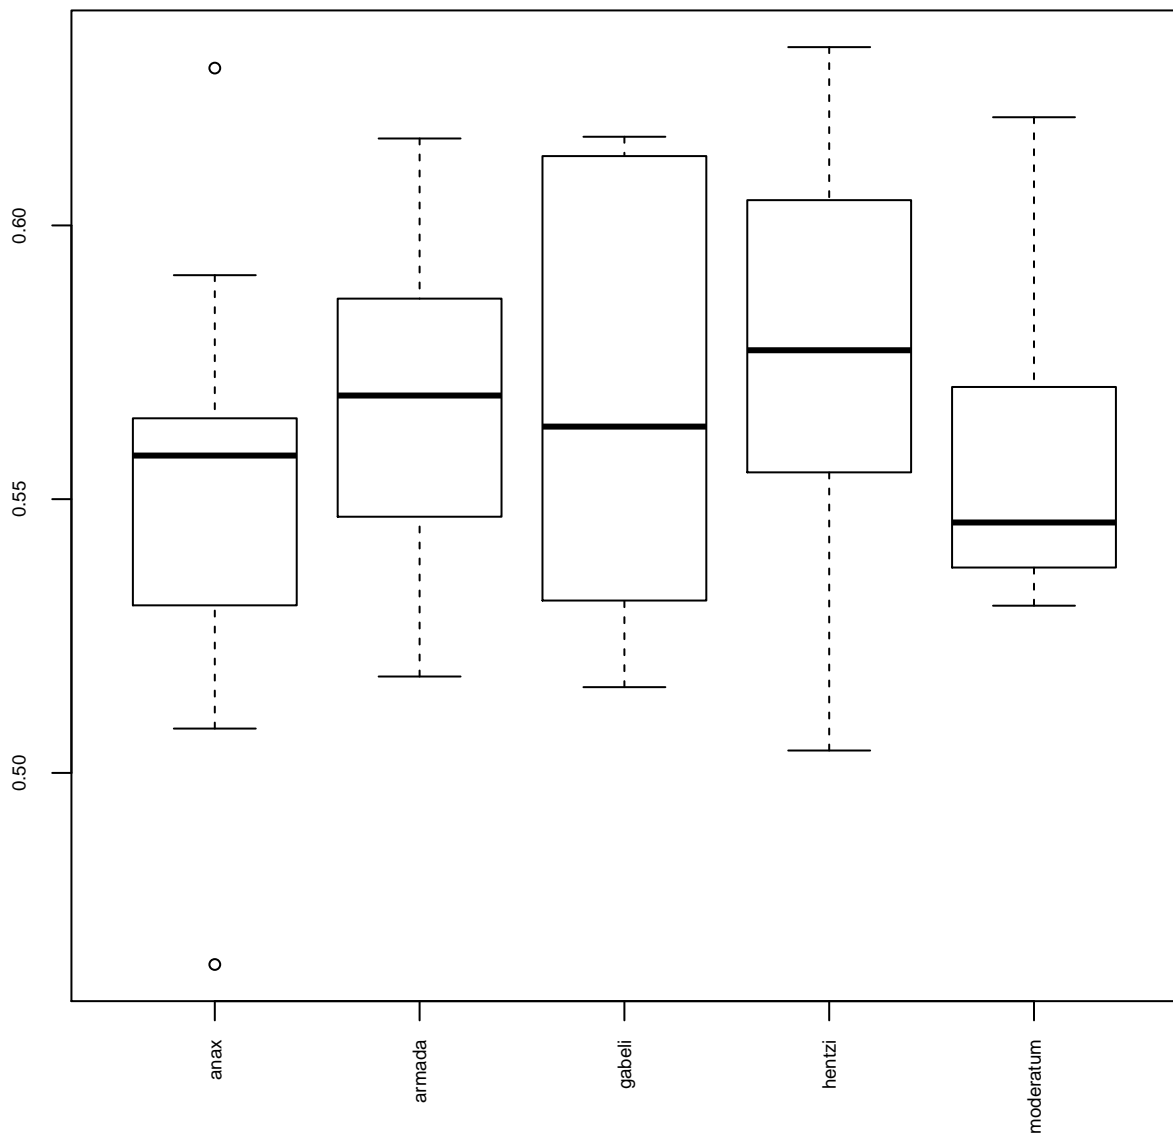

Supplement: Supplementary file 920

## Leg 1/Leg 4 Length ratio – females

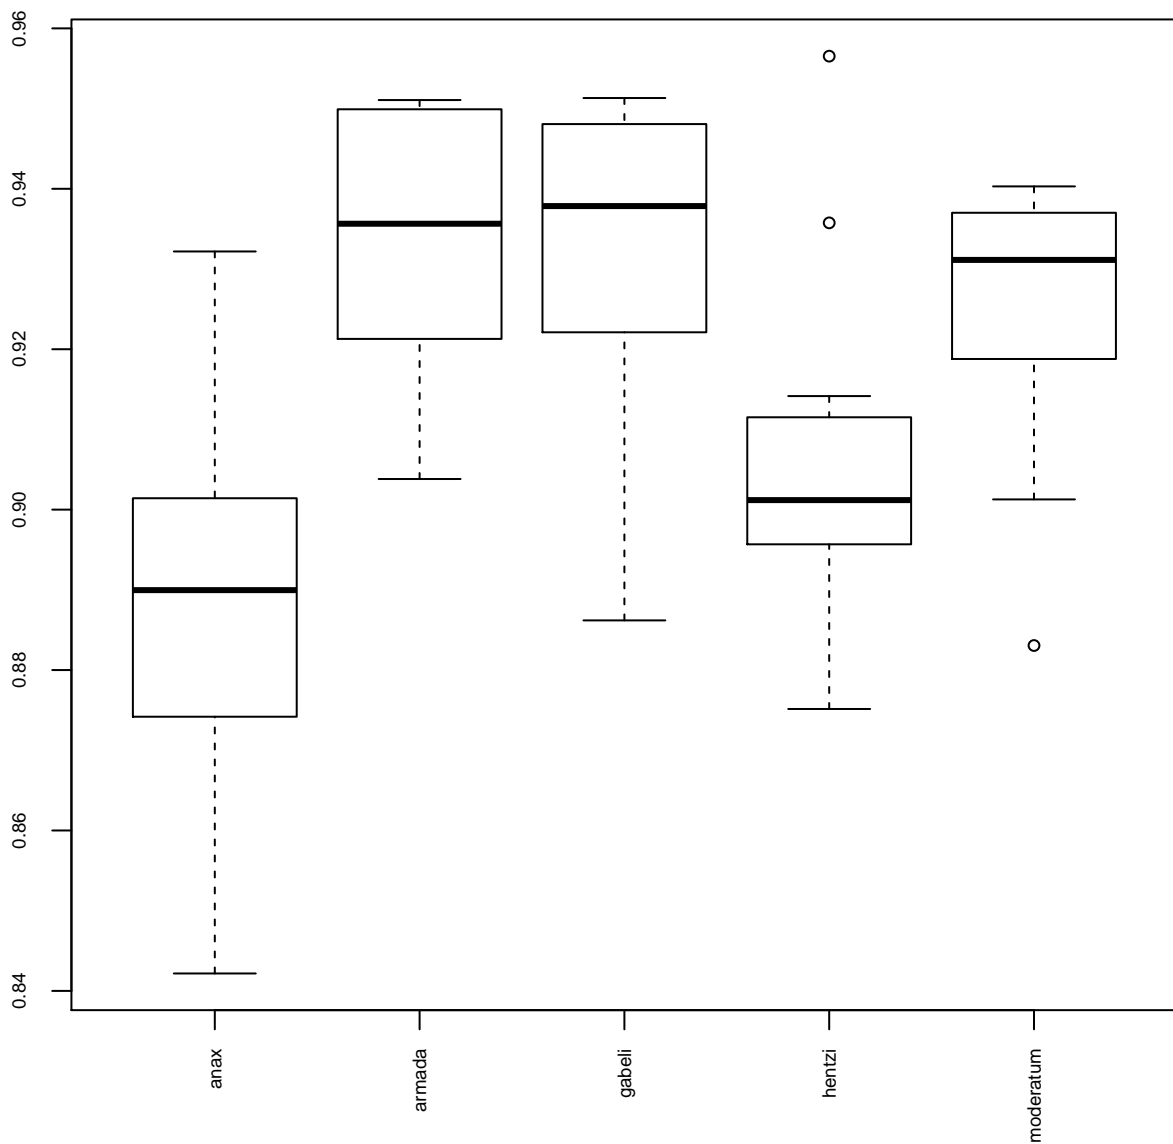

Supplement: Supplementary file 921

# Femur 1/Tibia 4 ratio – females

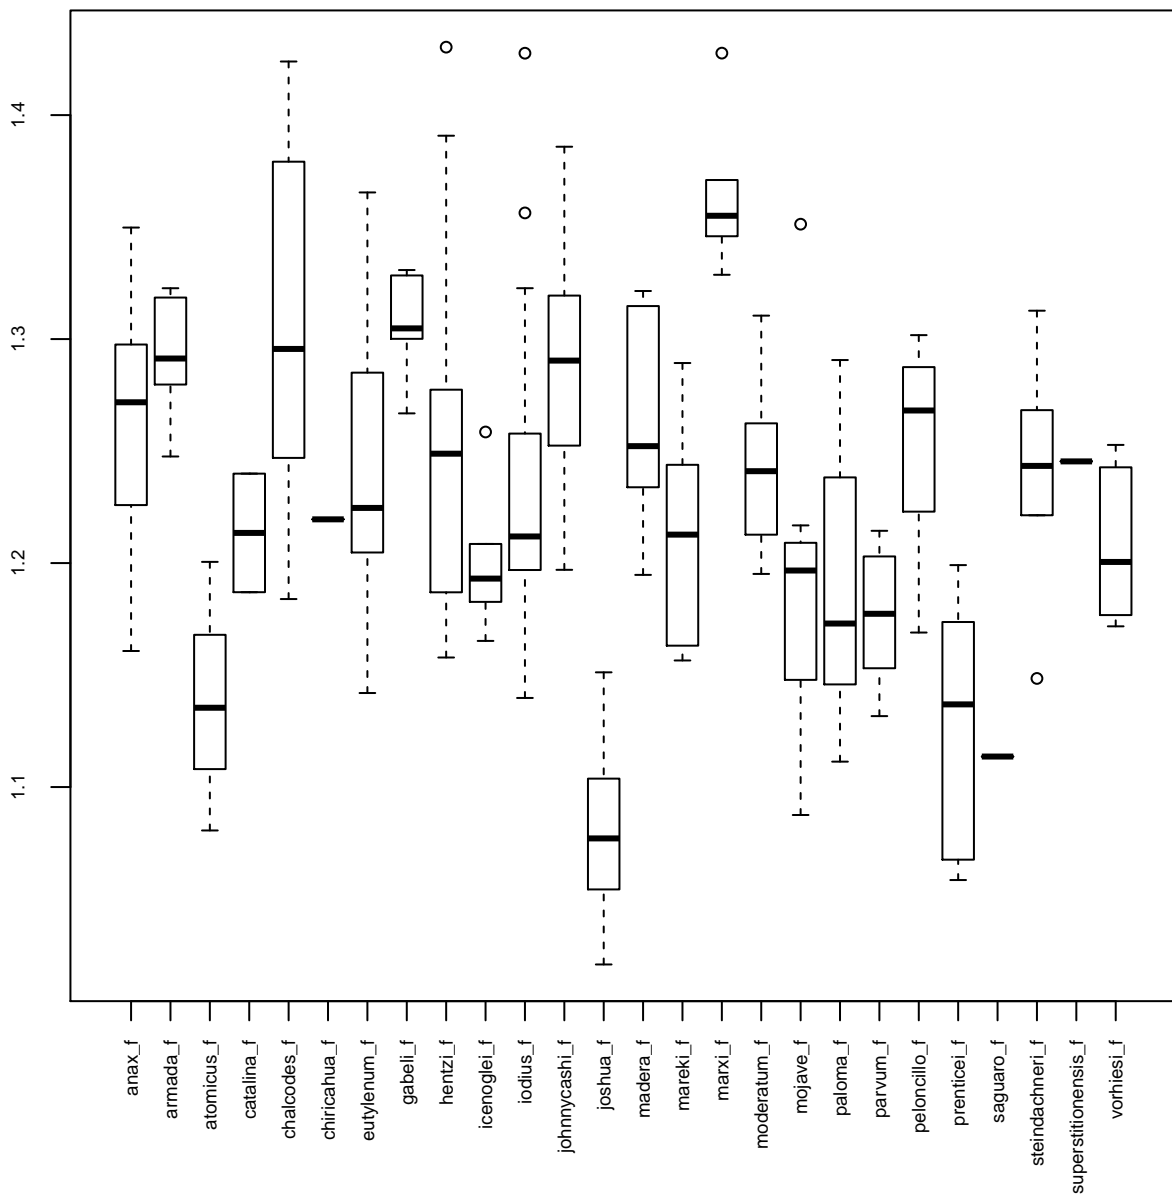

Supplement: Supplementary file 922

## Metatarsus 3/Metatarsus 4 ratio – females

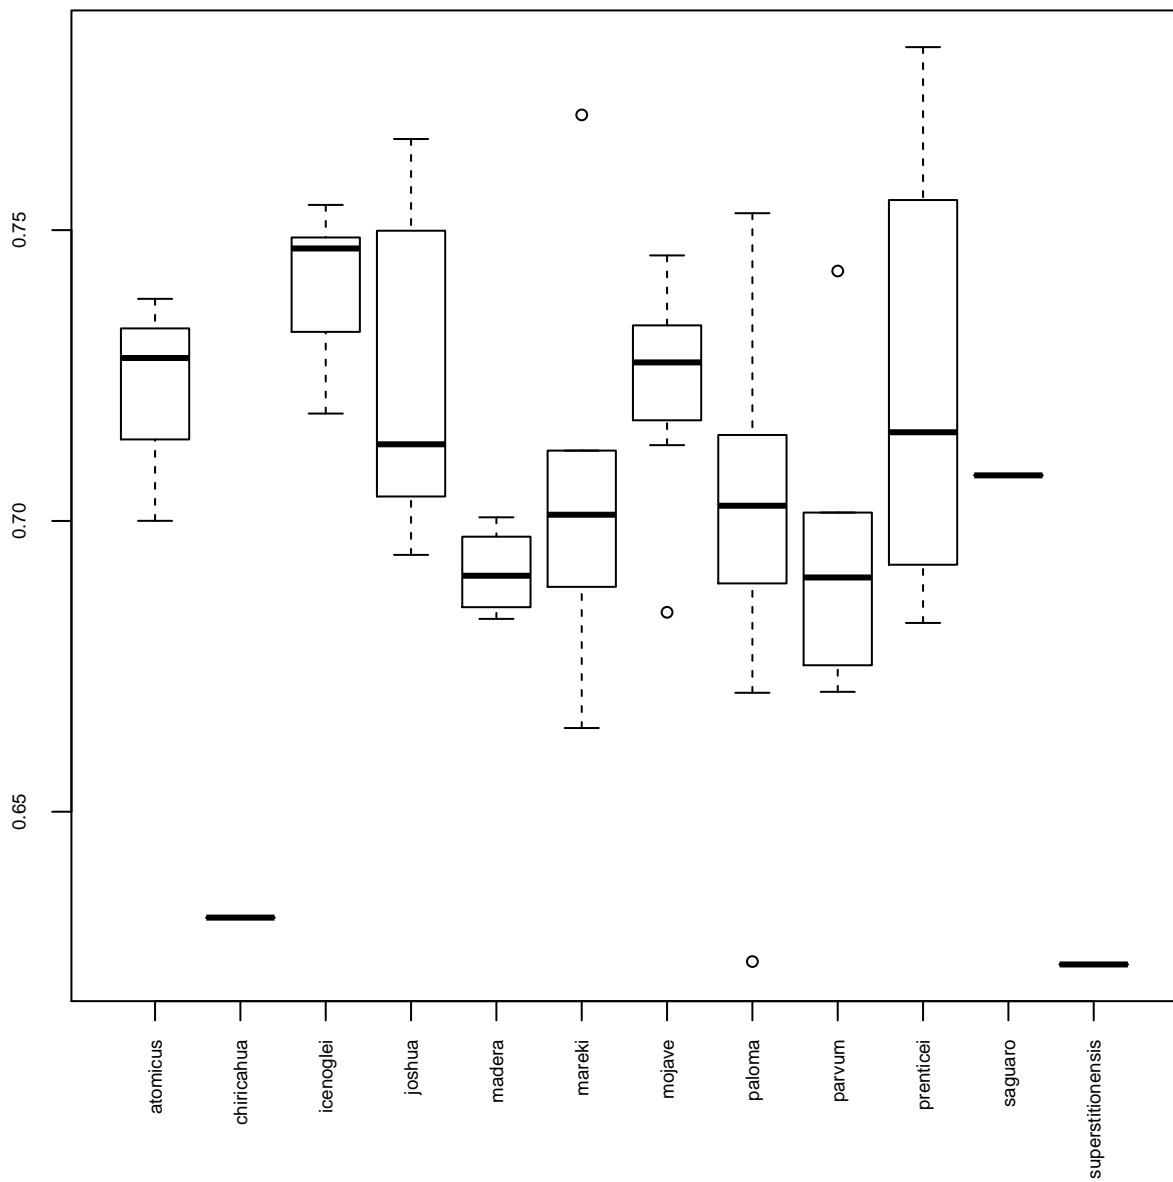

Supplement: Supplementary file 923

# Tarsus 1/Femur 3 Length ratio – males

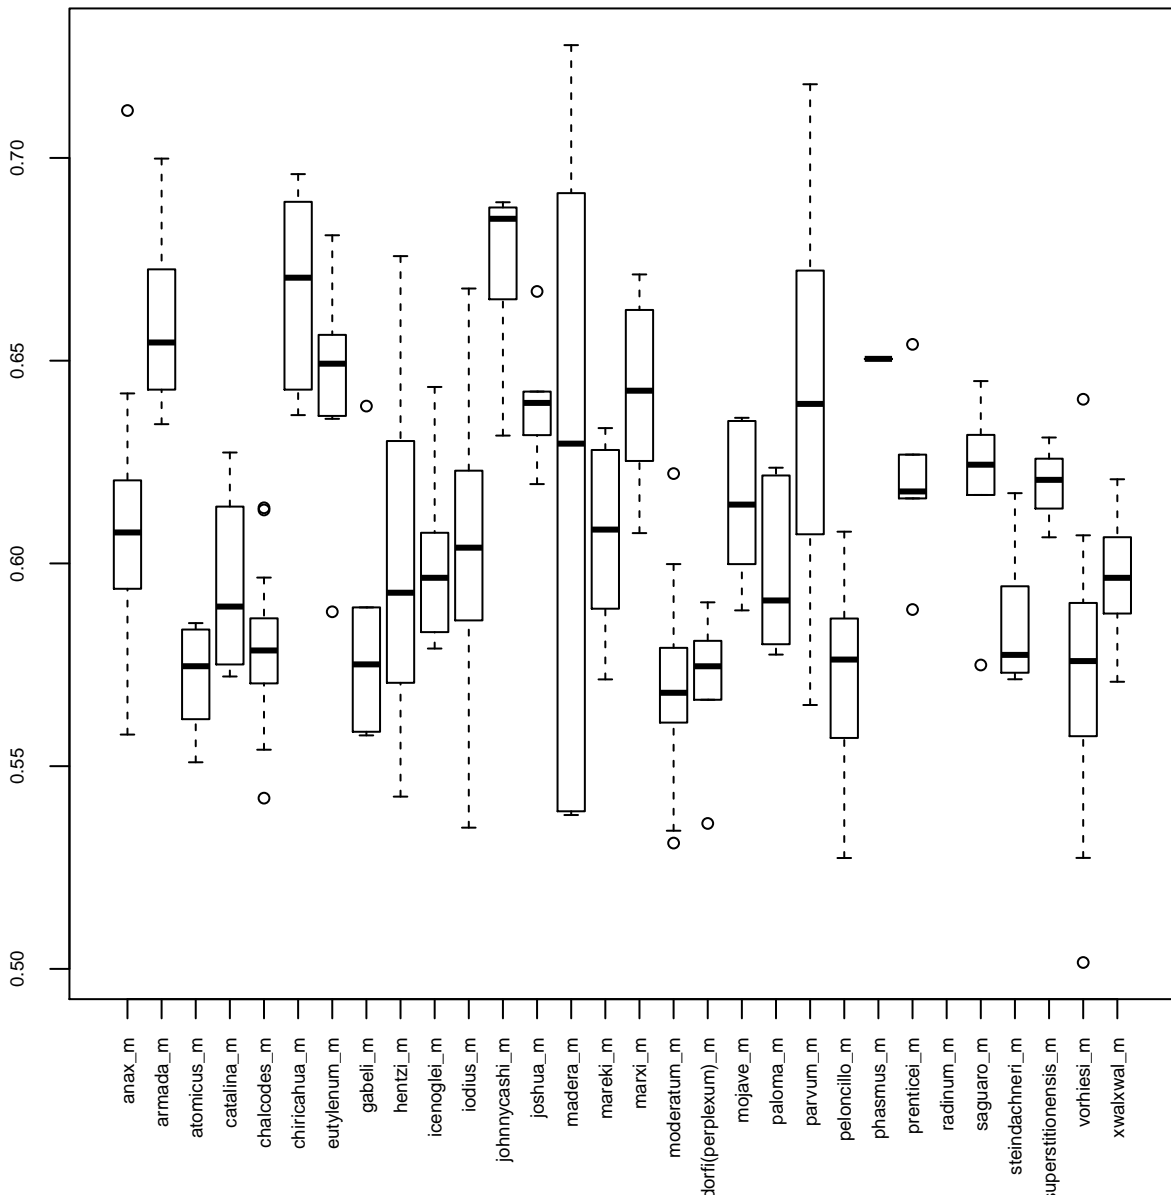

Supplement: Supplementary file 924

# Patella 1/Femur 4 Length ratio – females

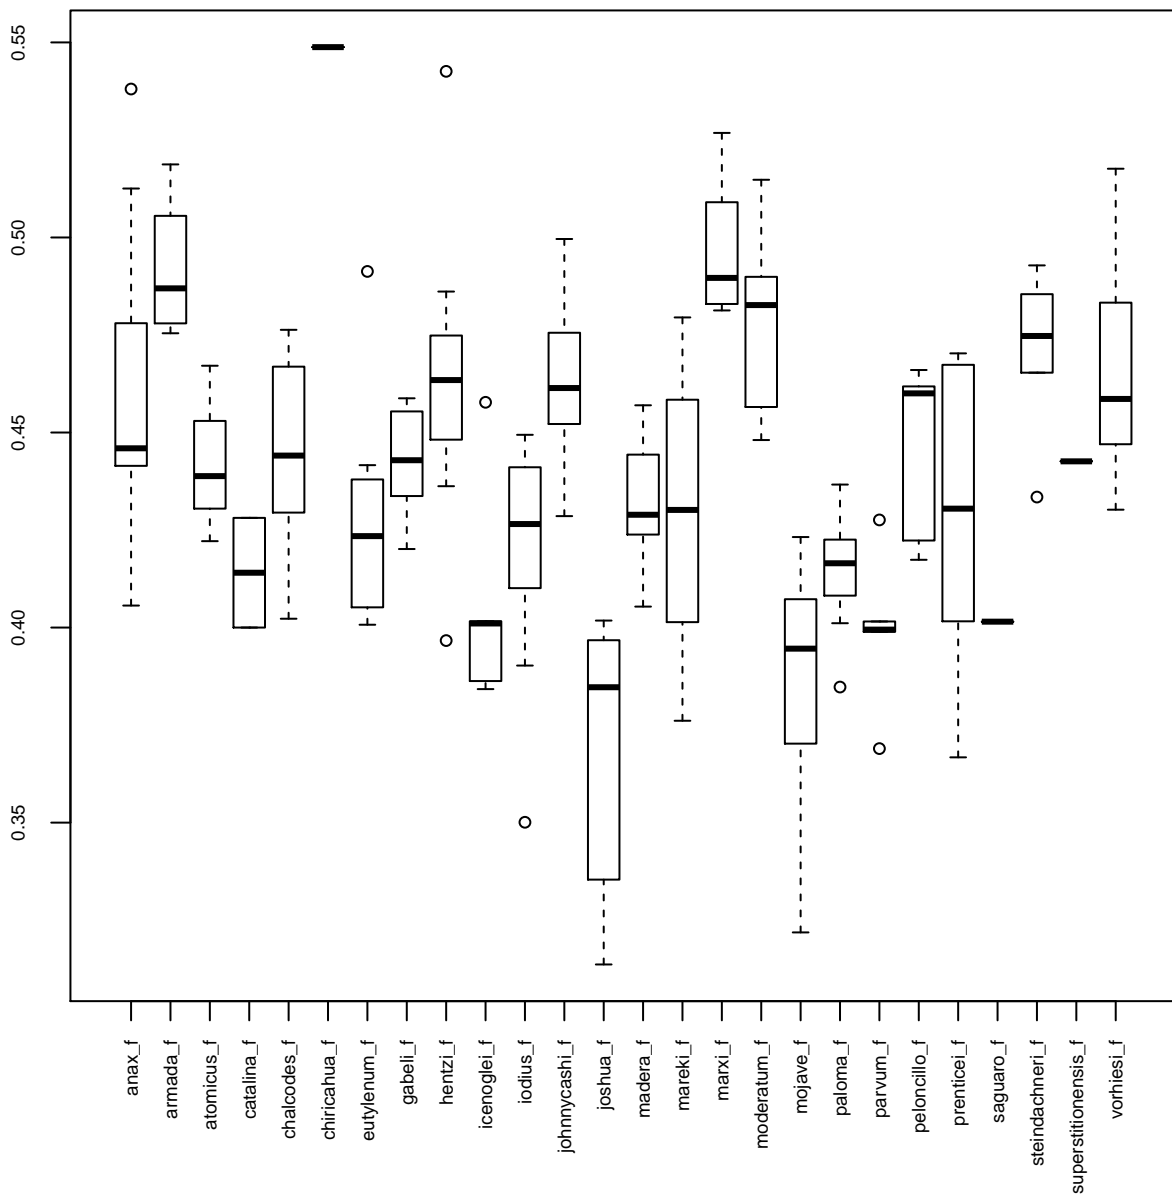

Supplement: Supplementary file 925

## Femur 3 Length/Width ratio – females

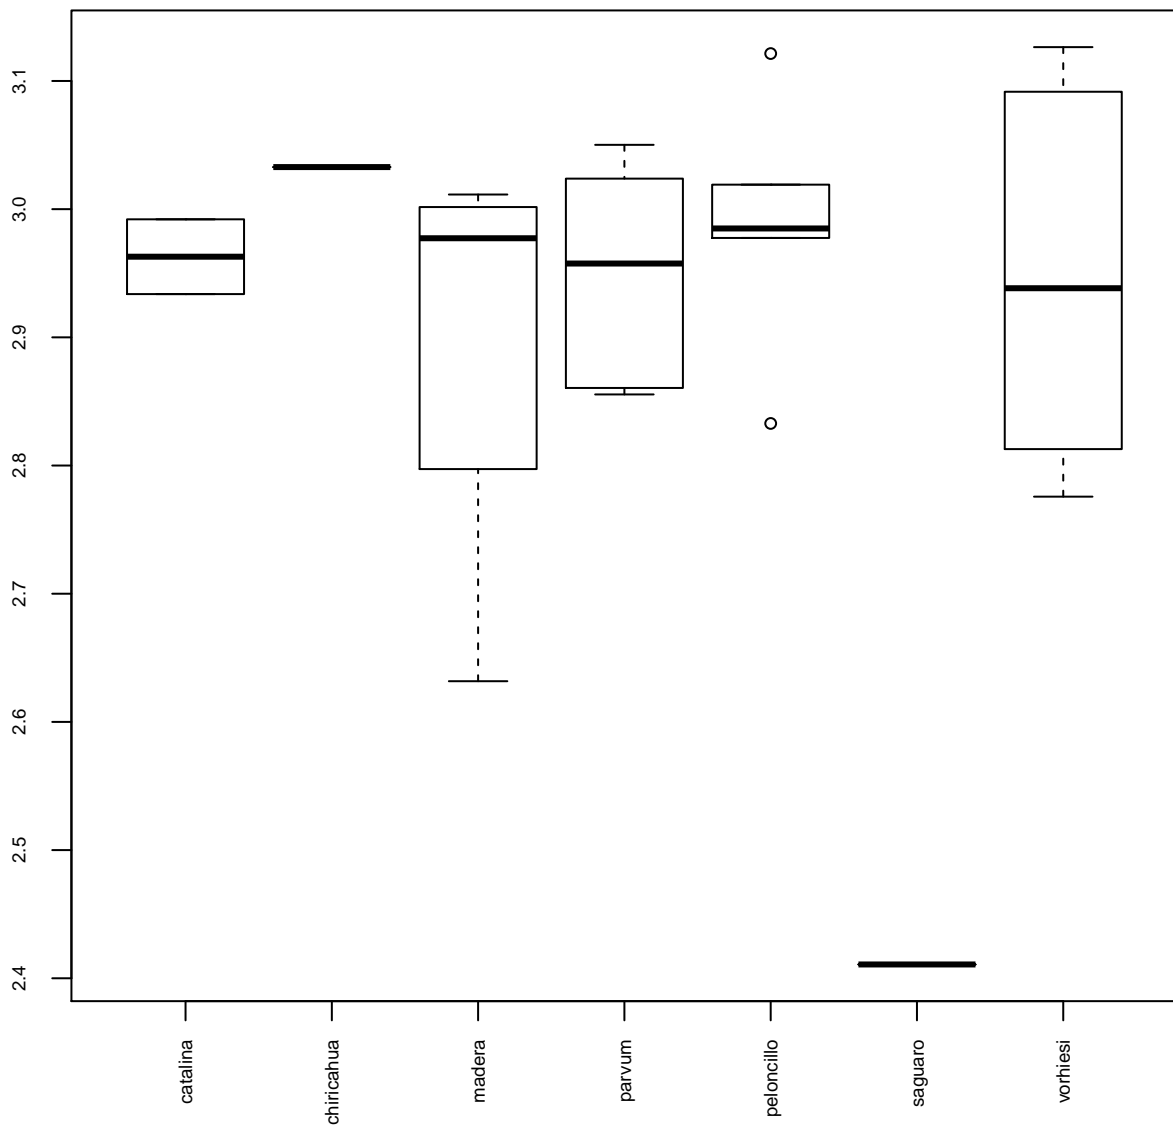

Supplement: Supplementary file 926

## Patella 1/Metatarsus 1 ratio – females

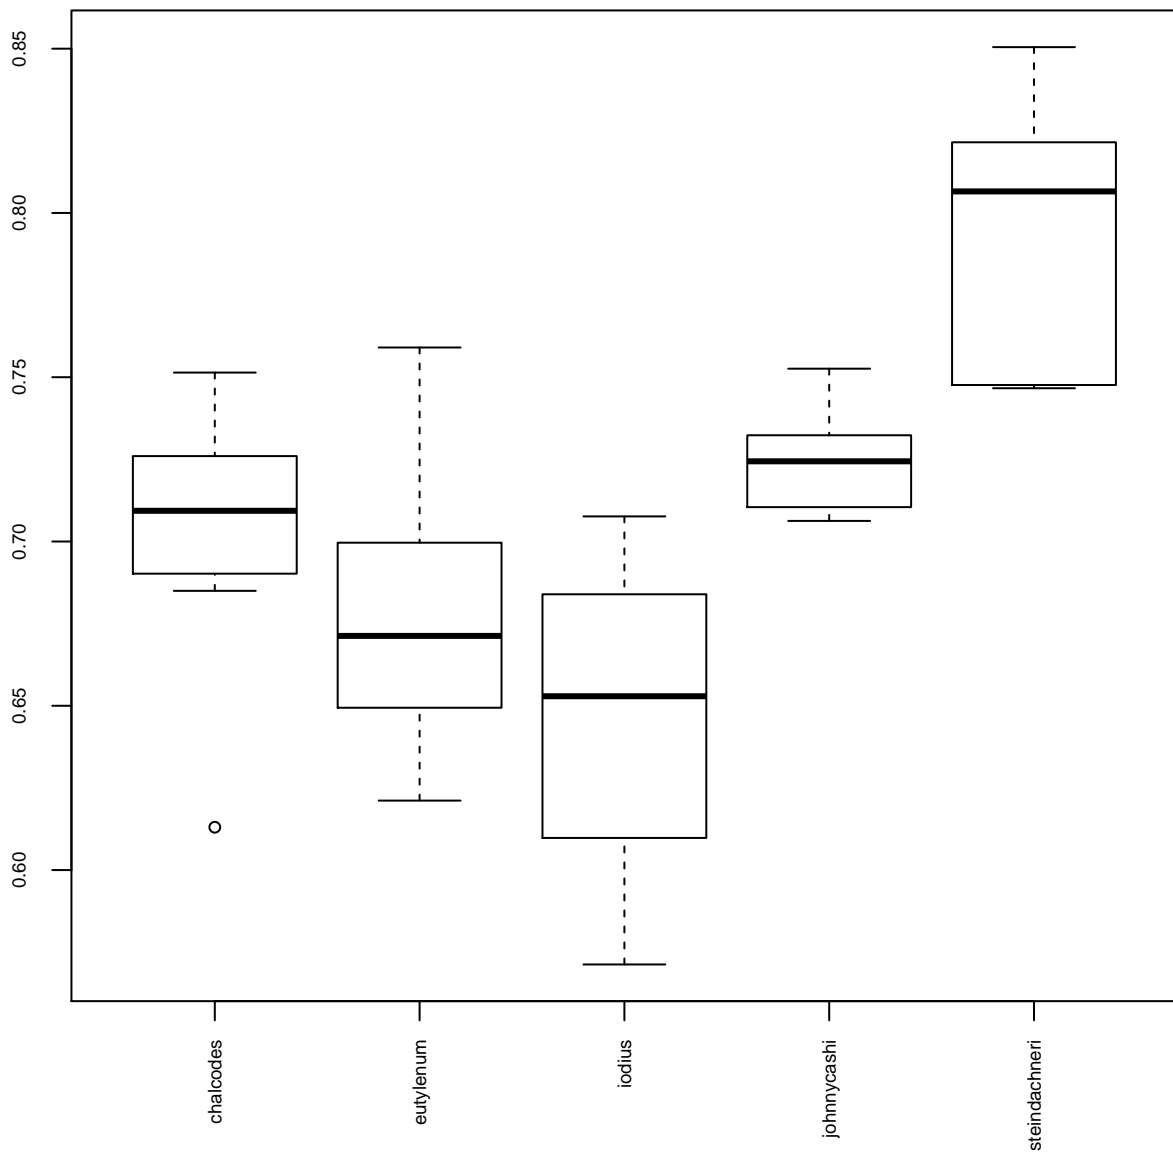

Supplement: Supplementary file 927

# Patella 3/Metatarsus 4 Length ratio – males

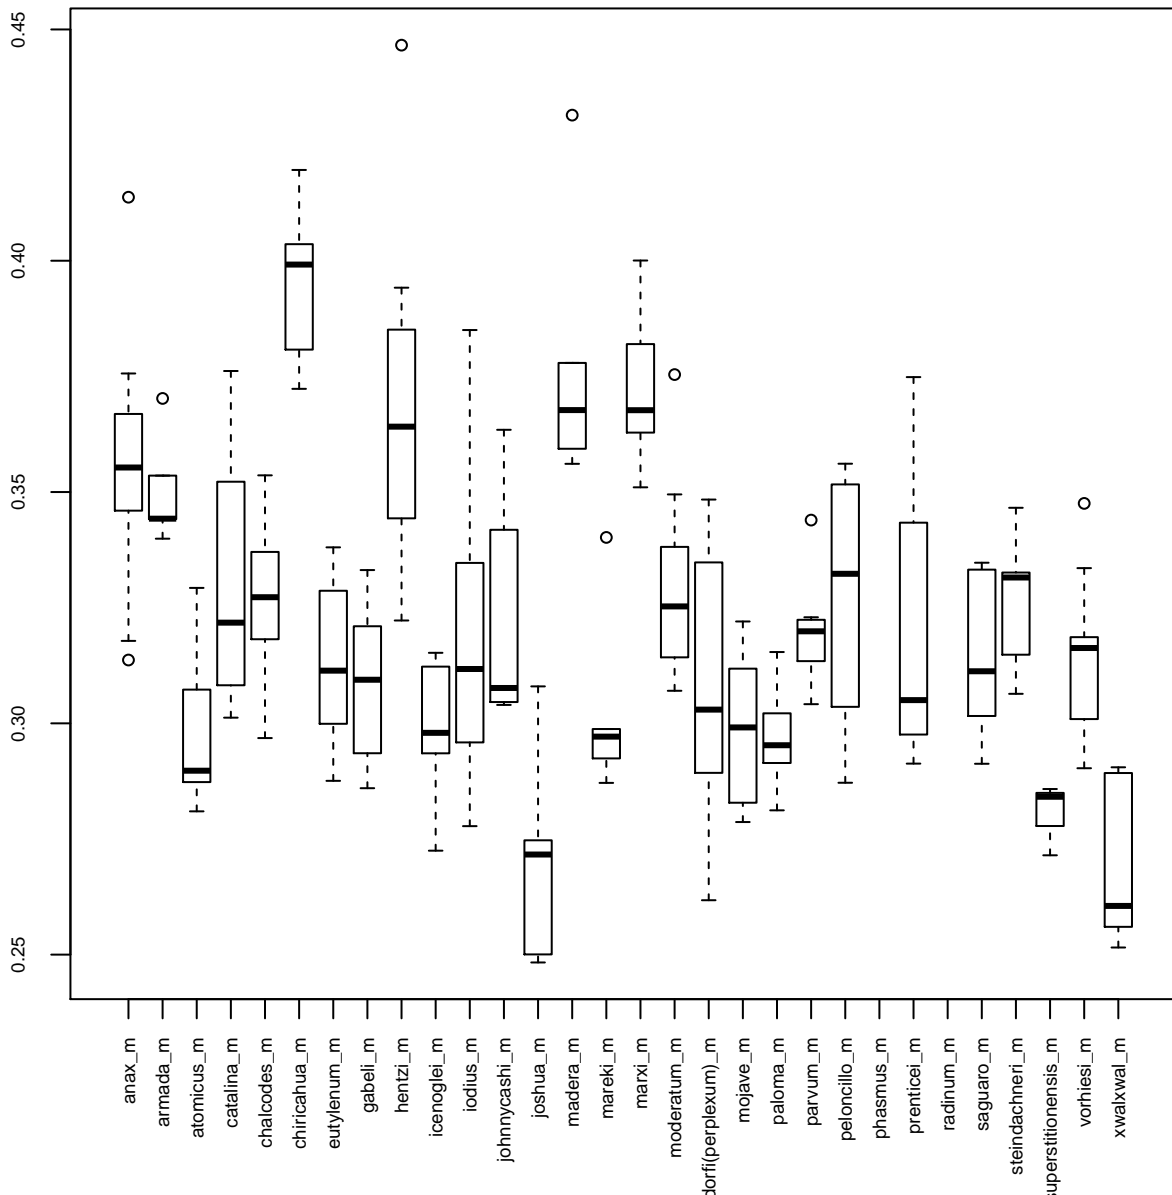

Supplement: Supplementary file 928

## Patella 1/Patella 4 ratio – males

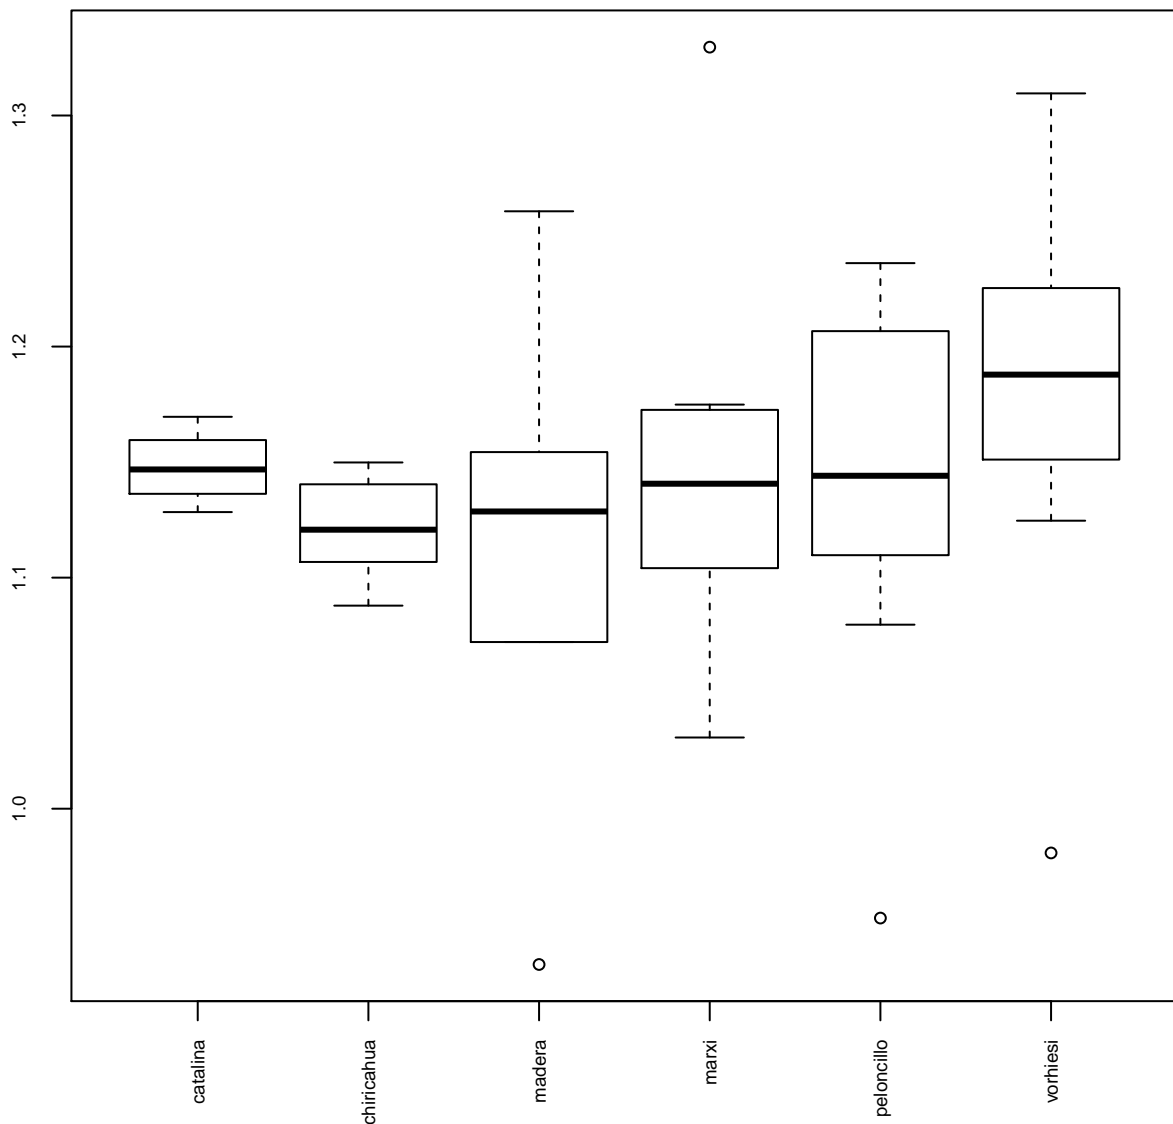

Supplement: Supplementary file 929

## Femur 3/Patella 3 ratio – males

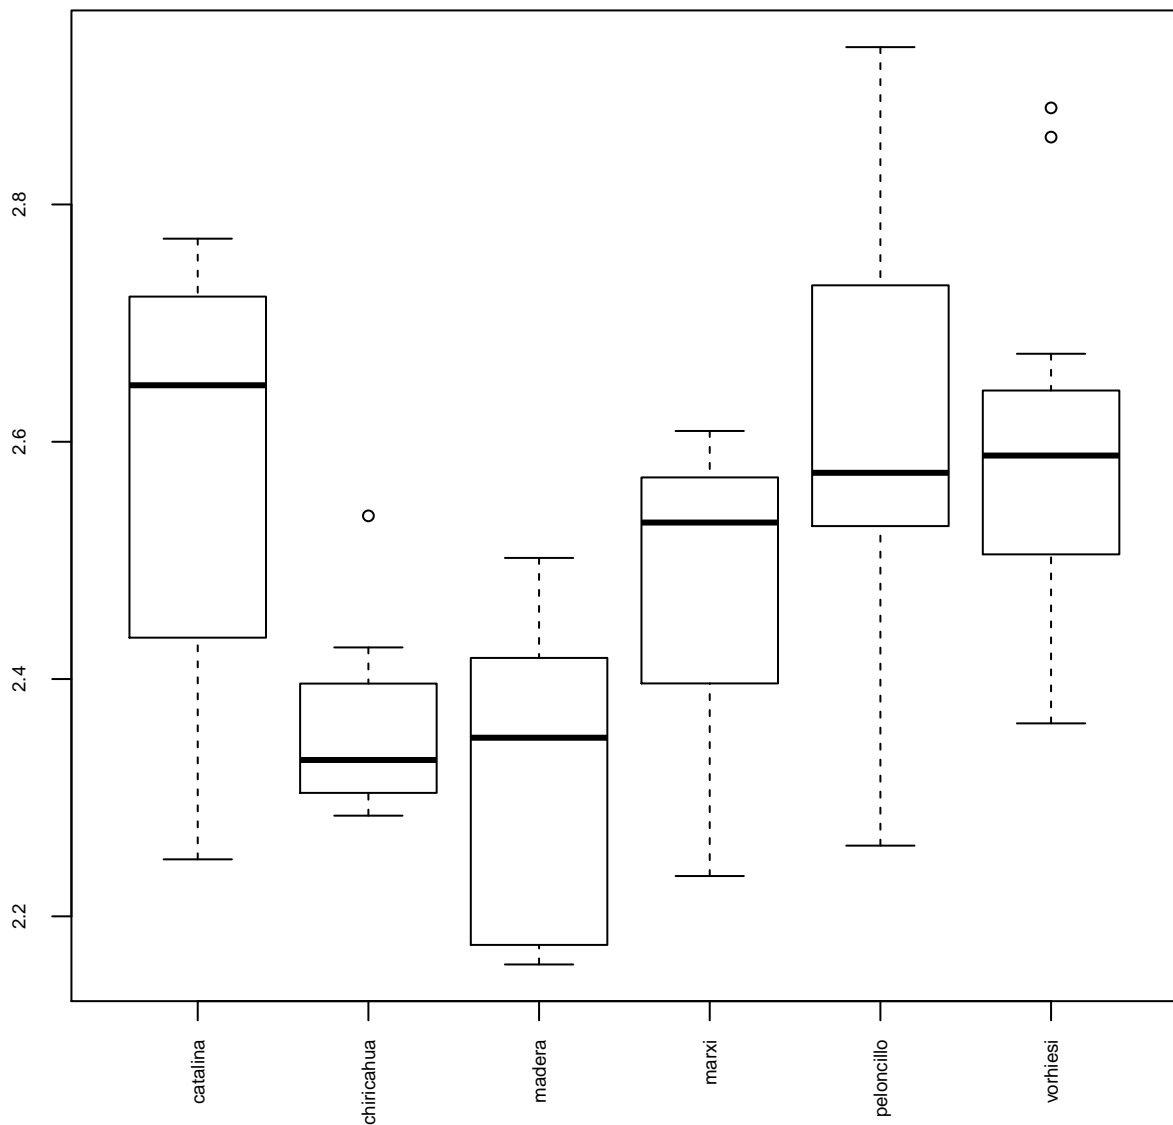

Supplement: Supplementary file 930

## Palpal Tibia/Tarsus 3 Length ratio – males

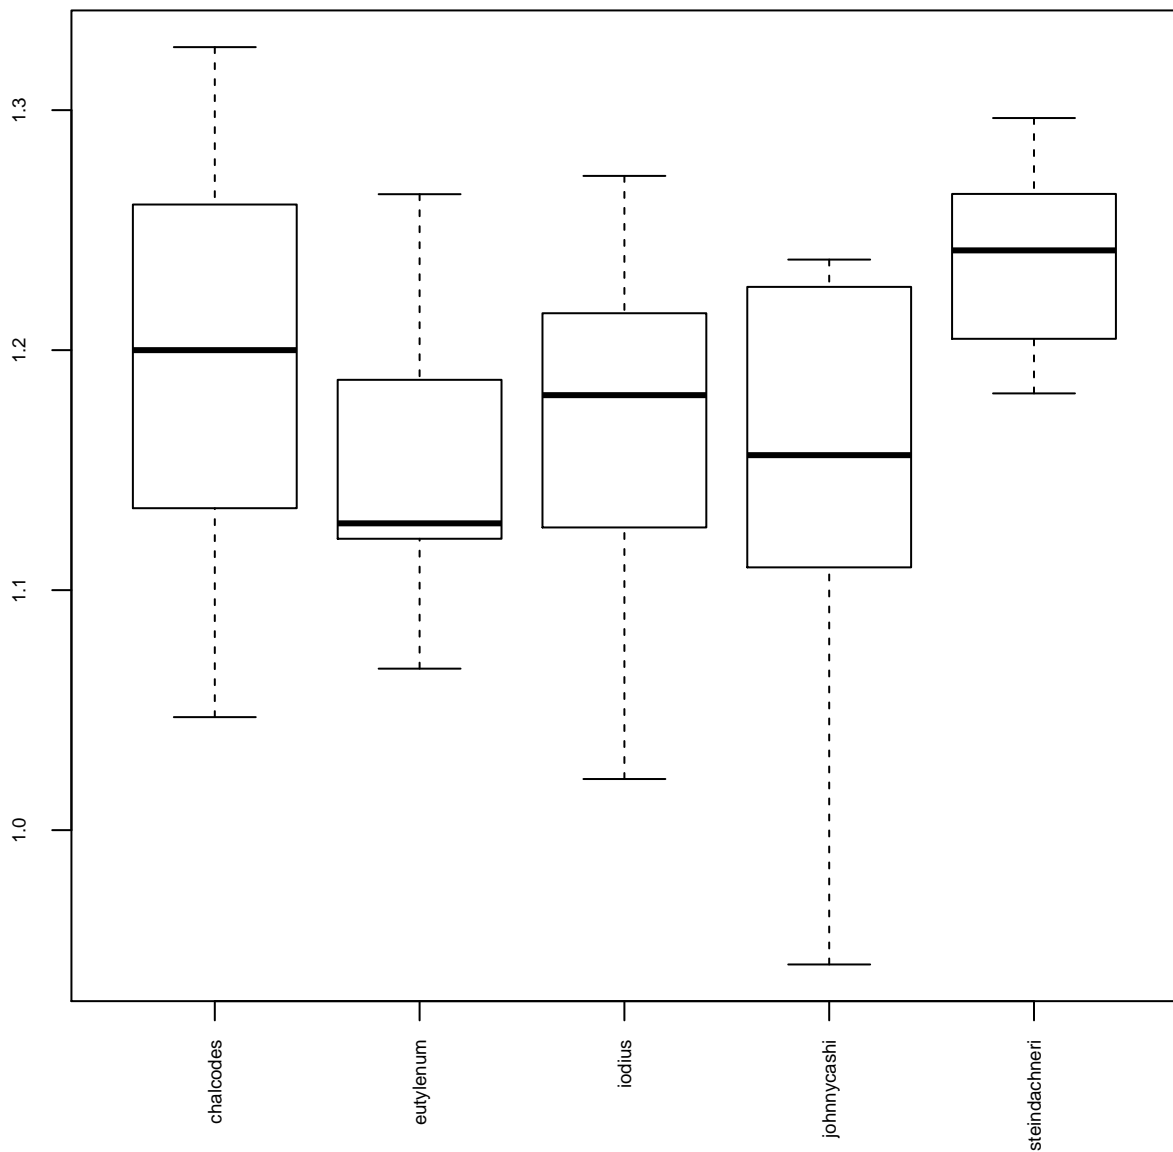

Supplement: Supplementary file 931

# Tarsus 1/Tarsus 4 ratio – females

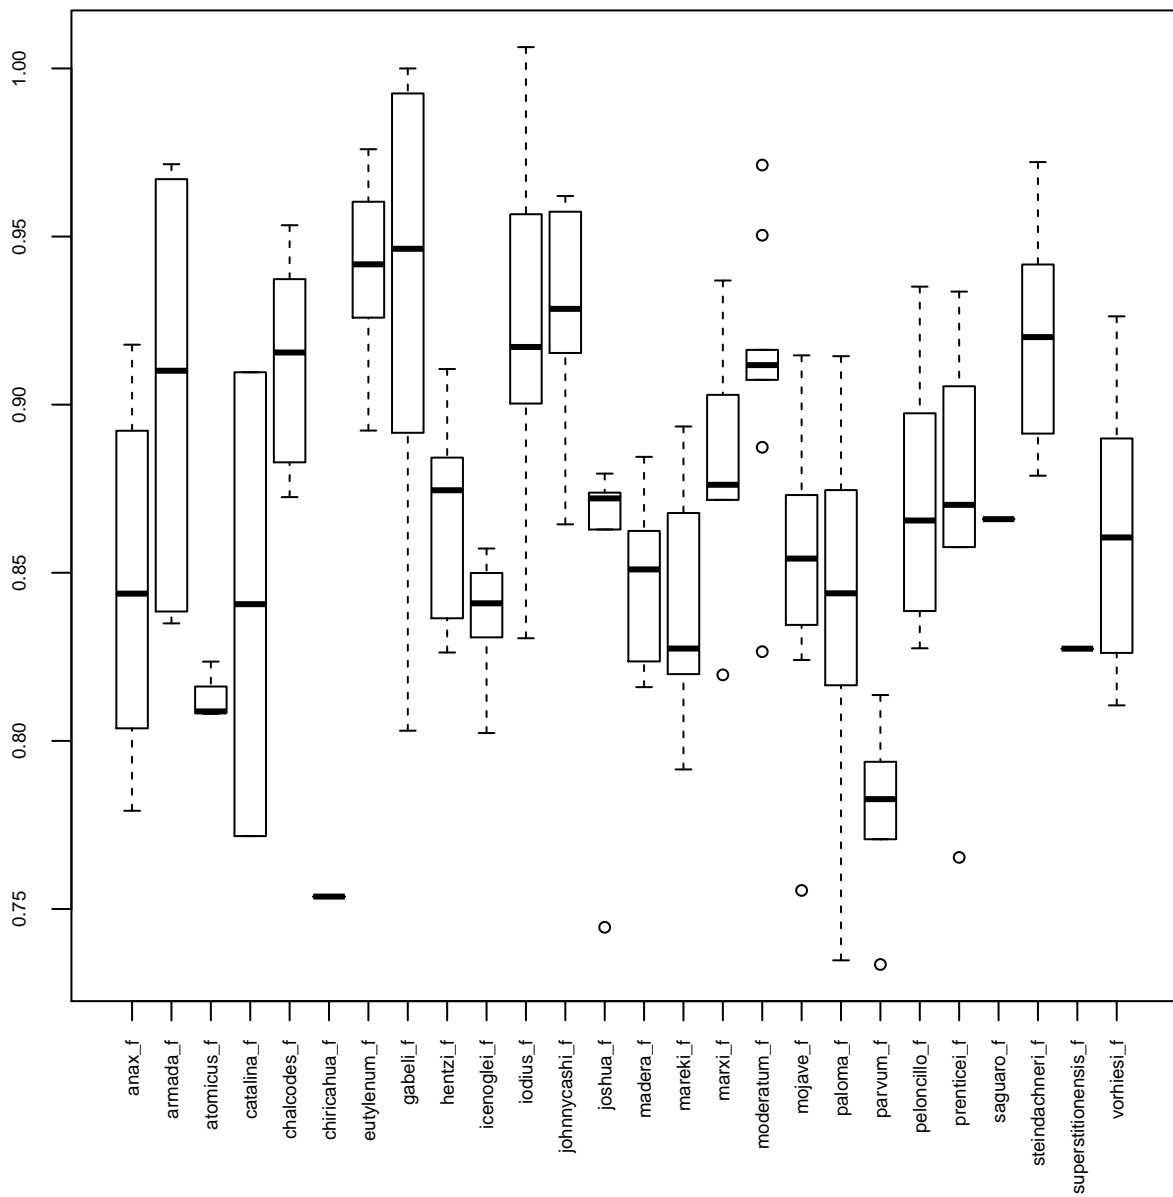

Supplement: Supplementary file 932

## Leg 4 Scopulation ratio – males

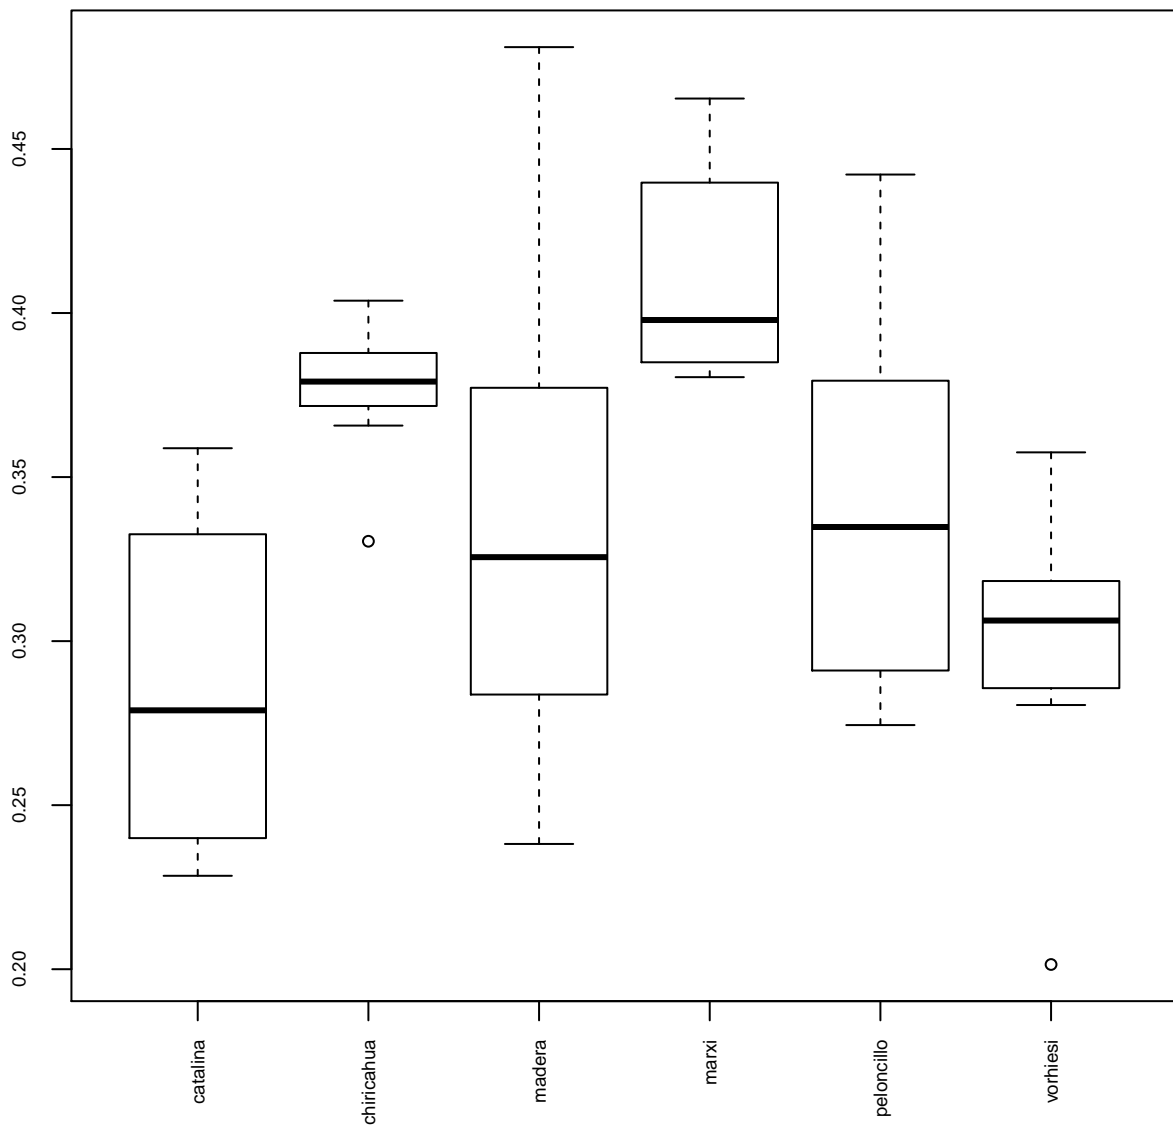

Supplement: Supplementary file 933

# Leg 3/Leg 4 Length ratio – males

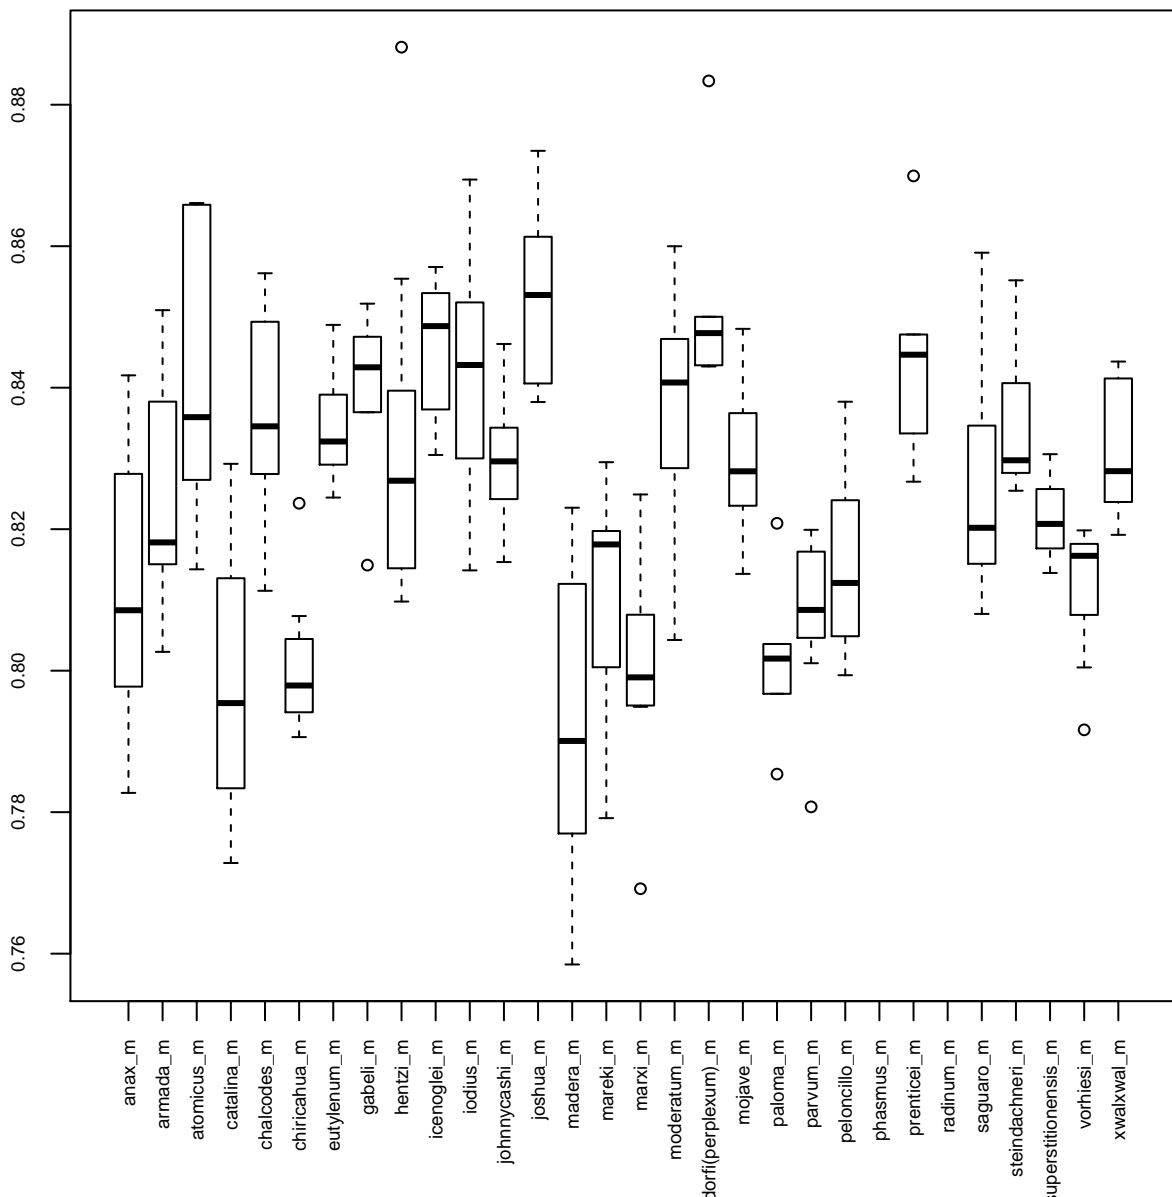

Supplement: Supplementary file 934

## Femur 4/Tibia 4 ratio – males

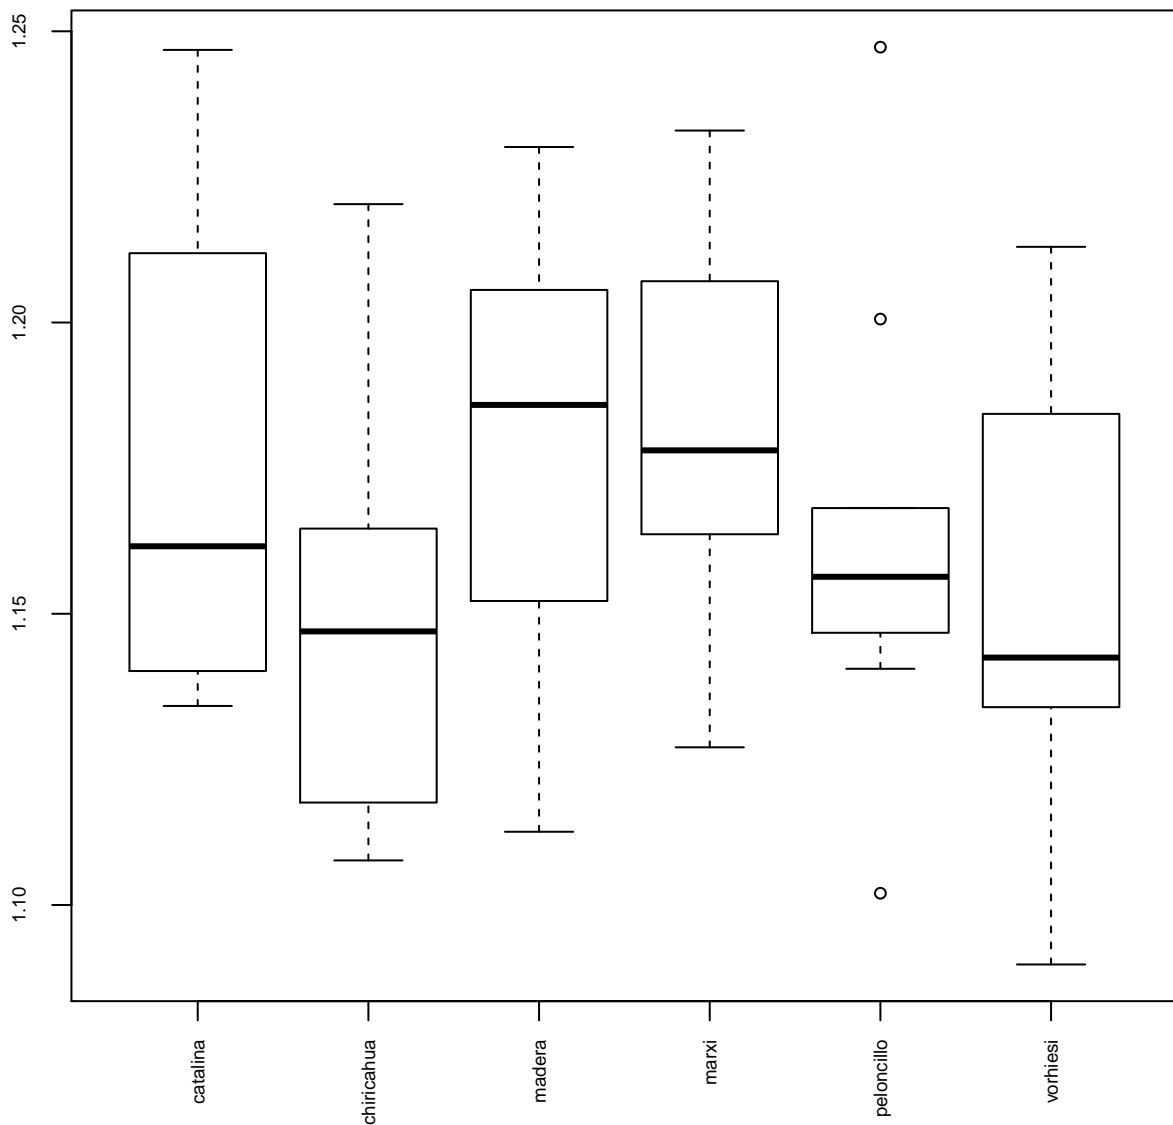

Supplement: Supplementary file 935

## Patella 1/Patella 3 ratio – females

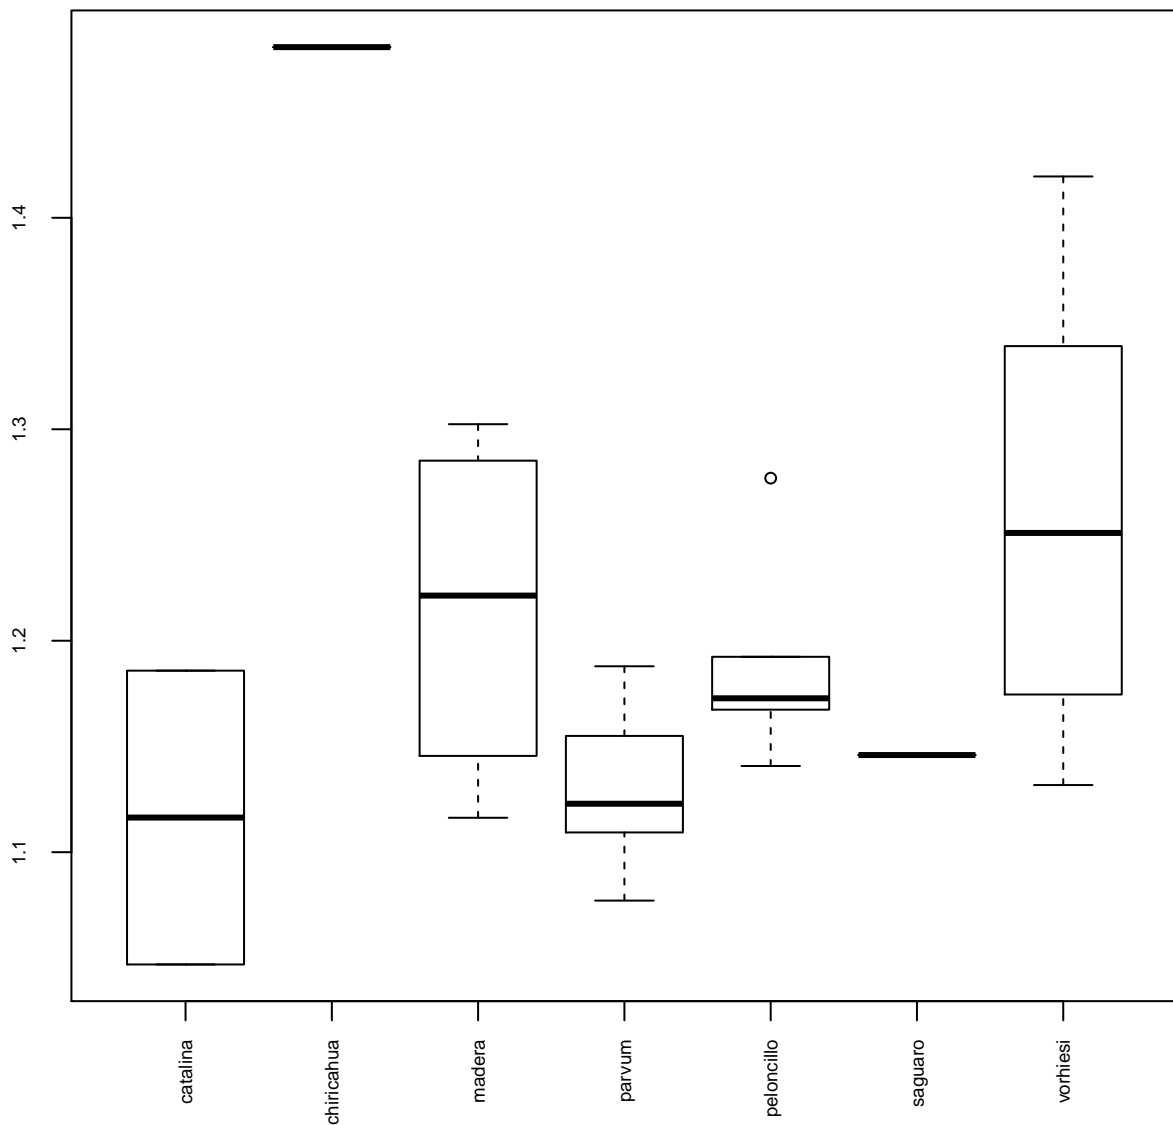

Supplement: Supplementary file 936

## Patella 1/Tarsus 1 ratio – males

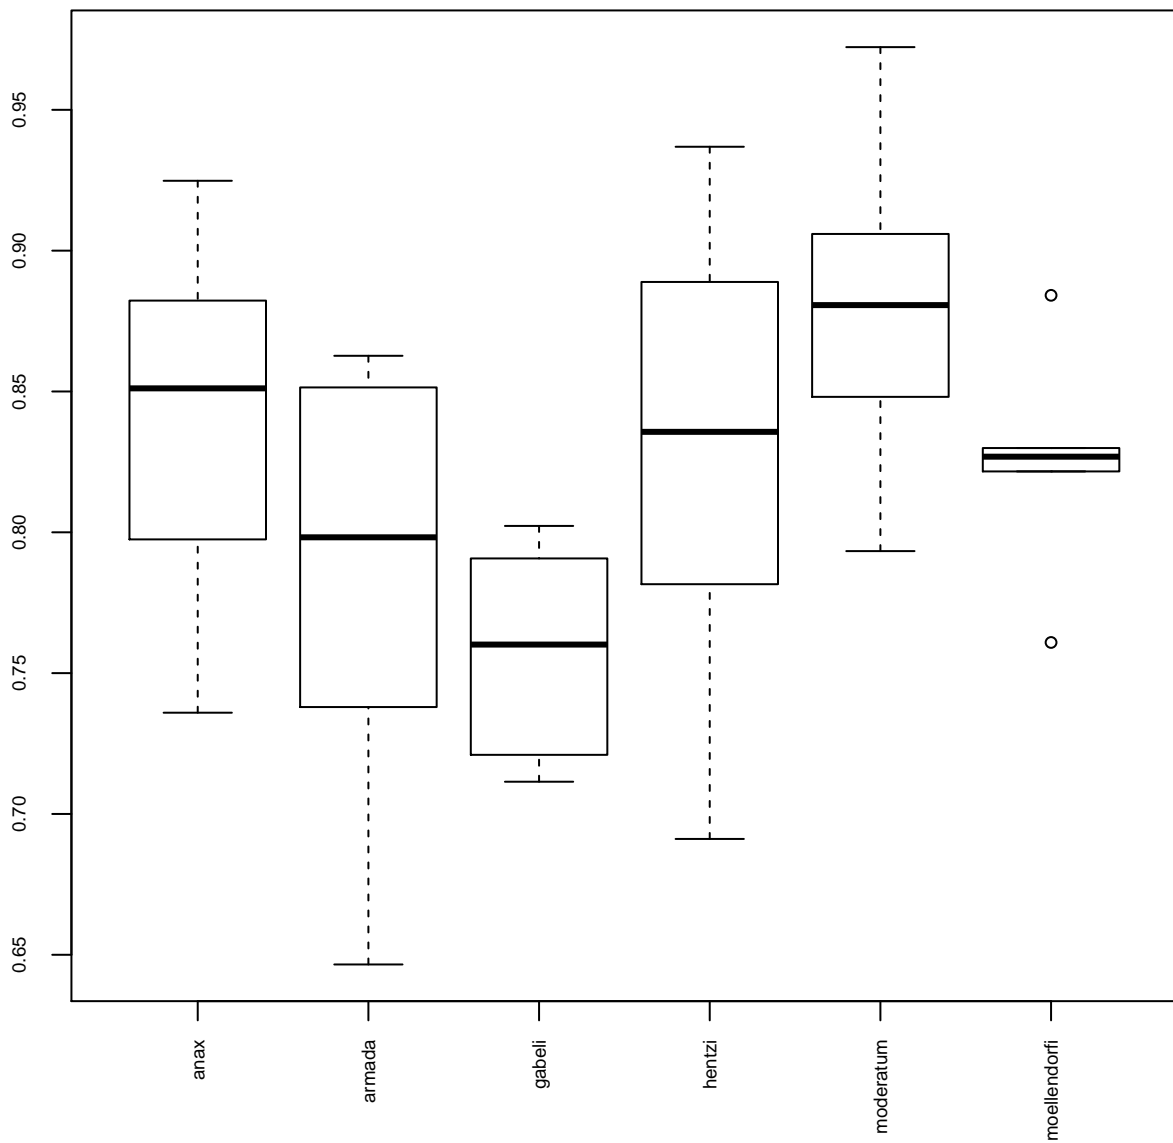

Supplement: Supplementary file 937

## Leg 1/Leg 3 Length ratio – females

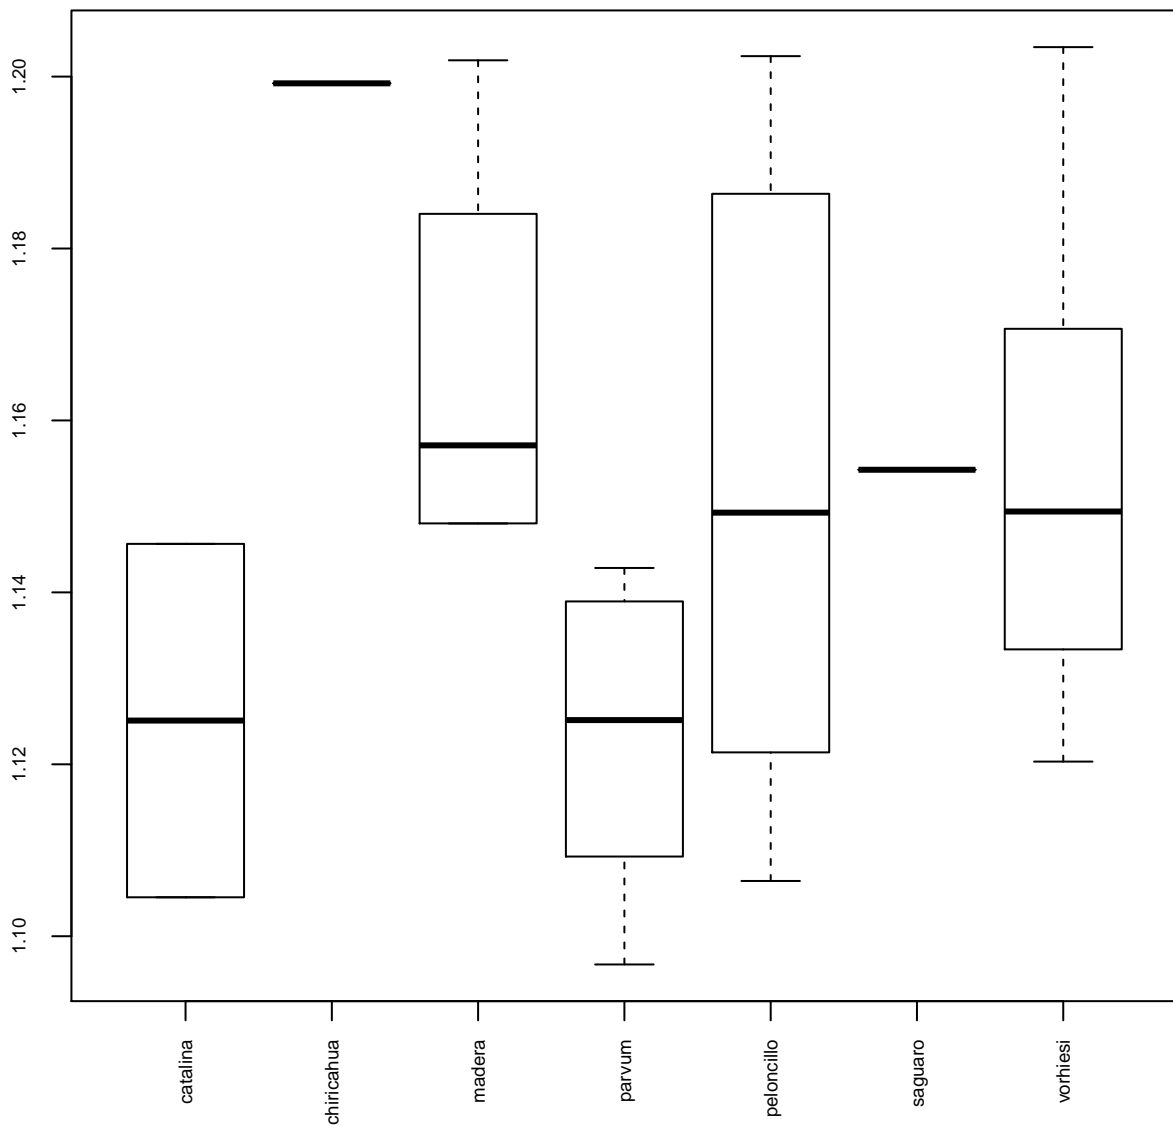

Supplement: Supplementary file 938

## Tibia 4/Metatarsus 4 ratio – females

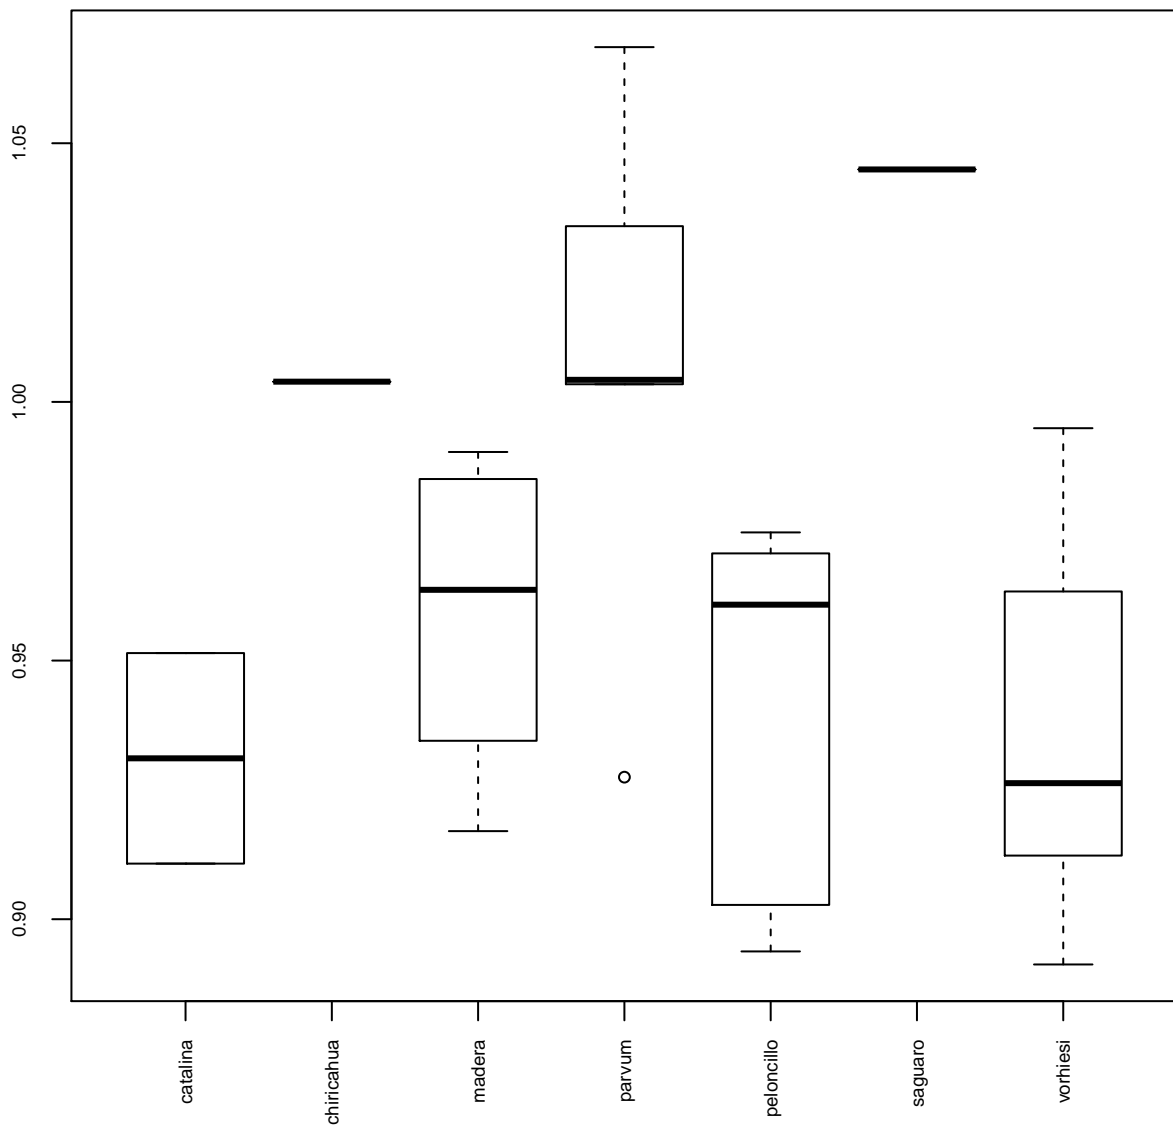

Supplement: Supplementary file 939

# Metatarsus 1/Femur 3 Length ratio – females

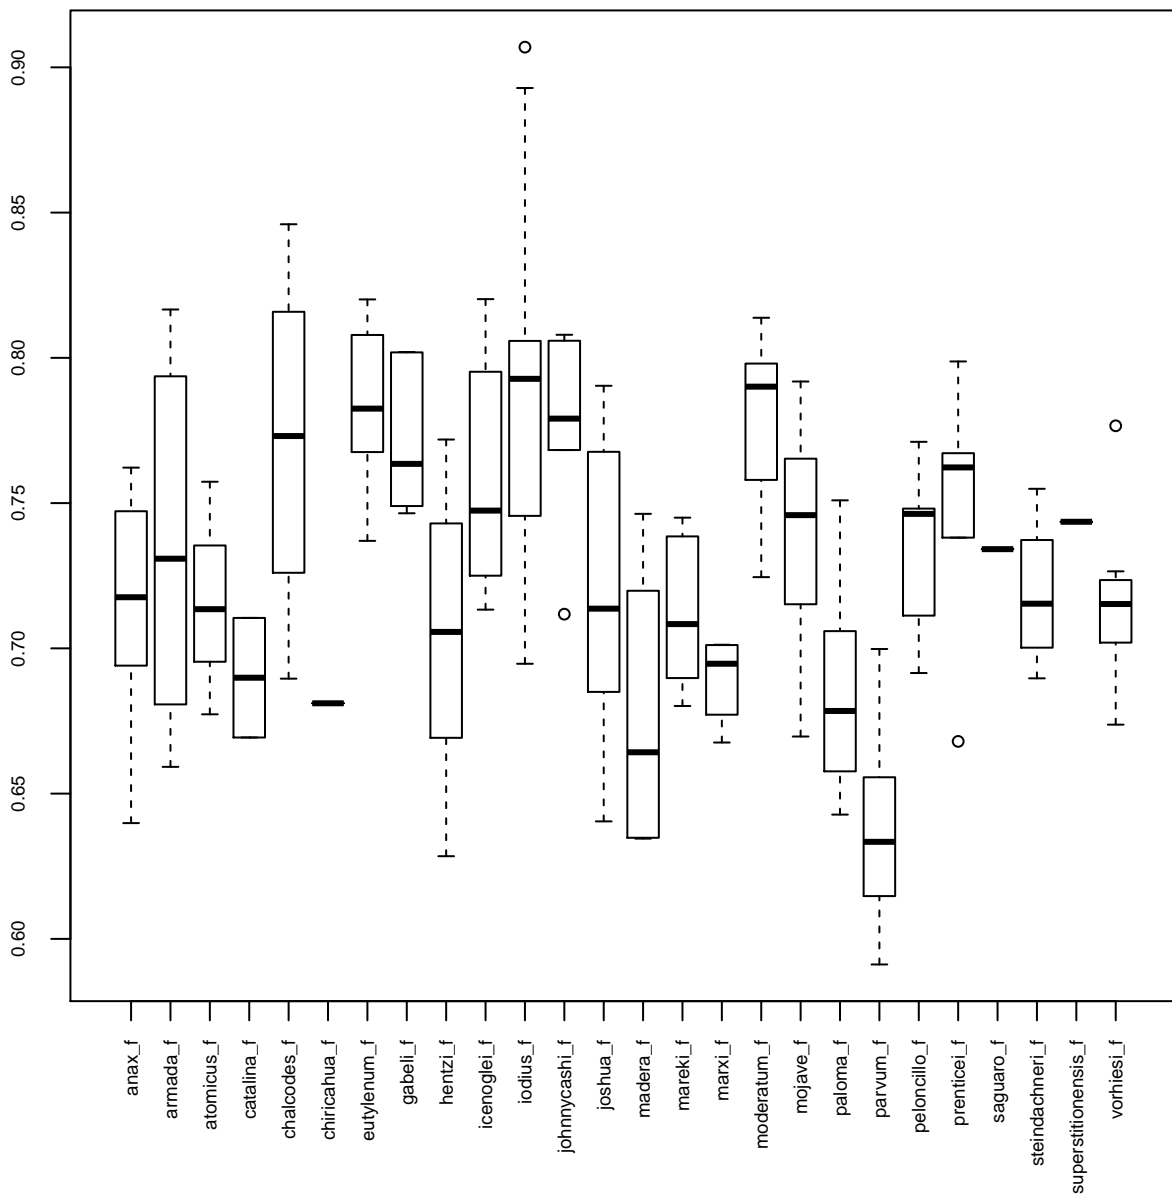

Supplement: Supplementary file 940

## Carapace Length/Patella 4 ratio – females

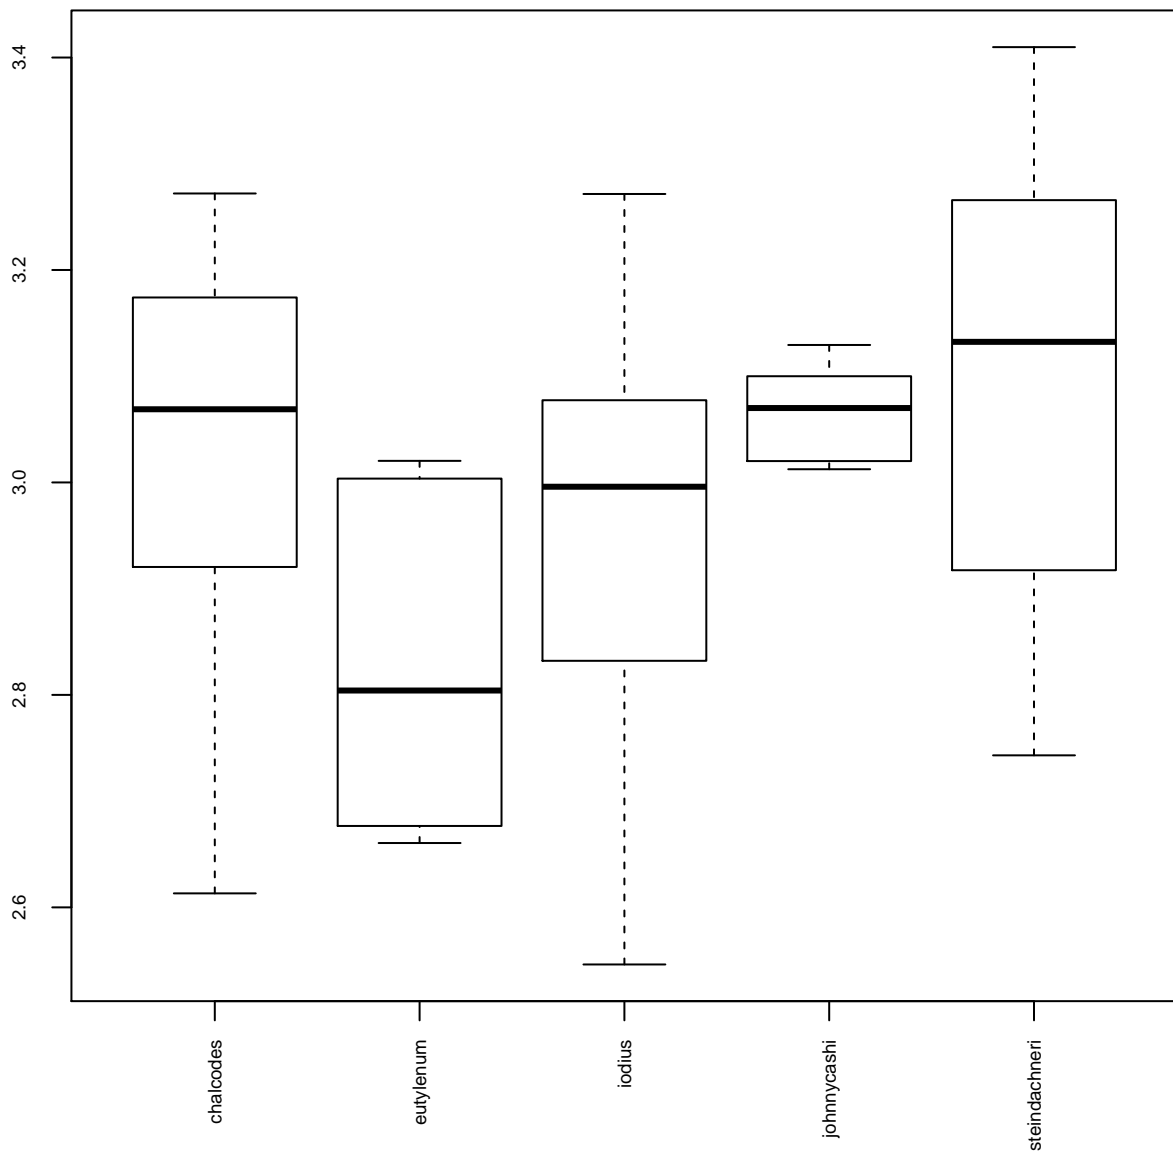

Supplement: Supplementary file 941

# Patella 1/Tarsus 4 Length ratio – males

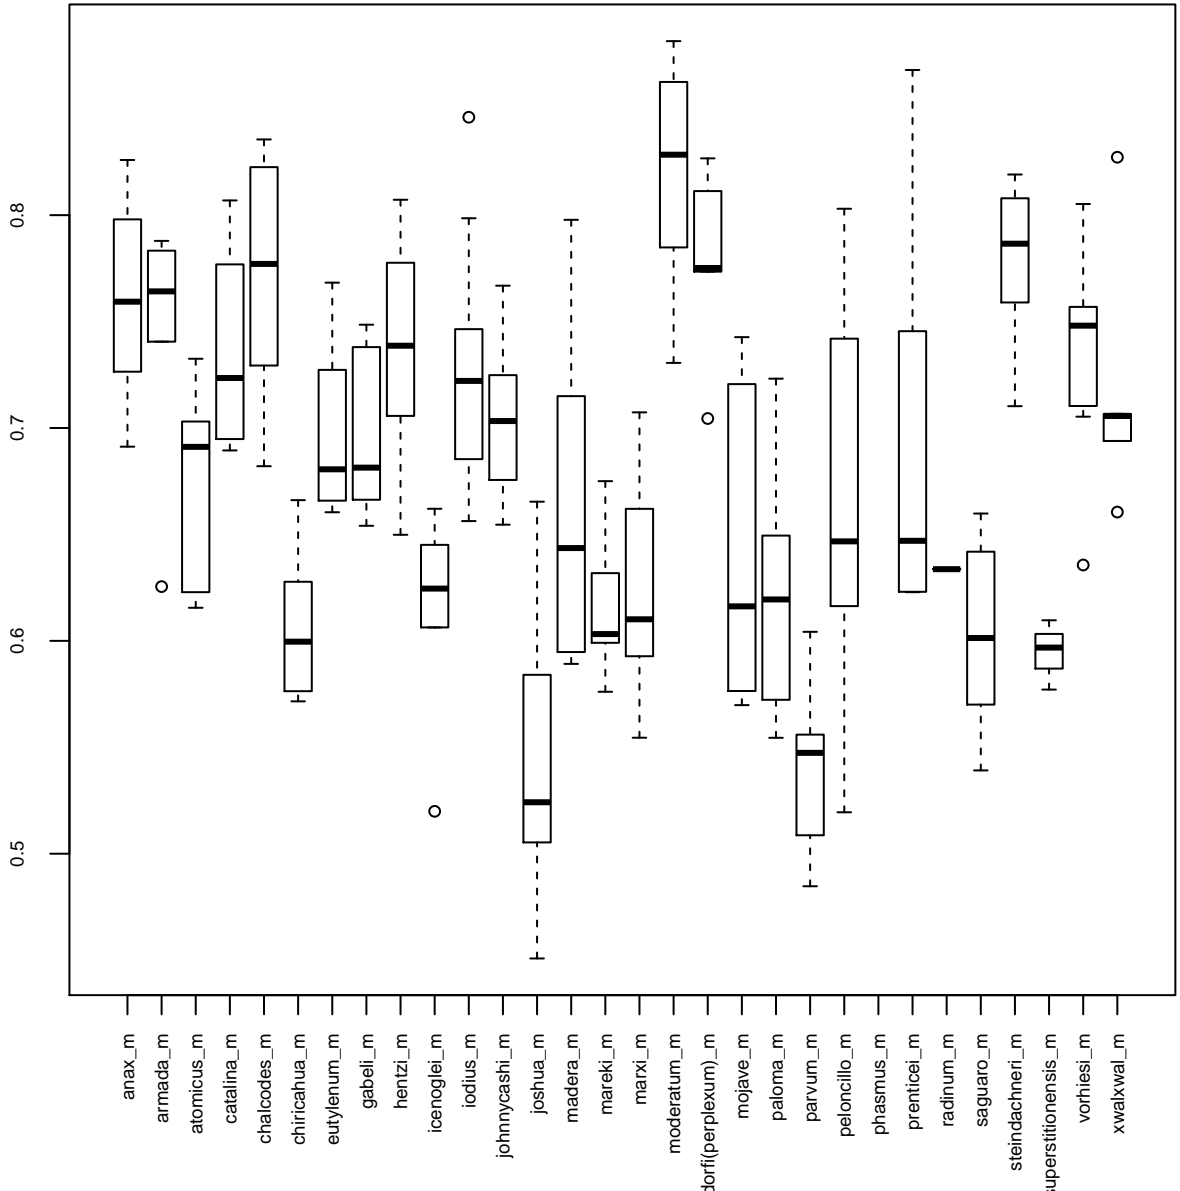

Supplement: Supplementary file 942

# Carapace Length/Palpal Tibia Width ratio – males

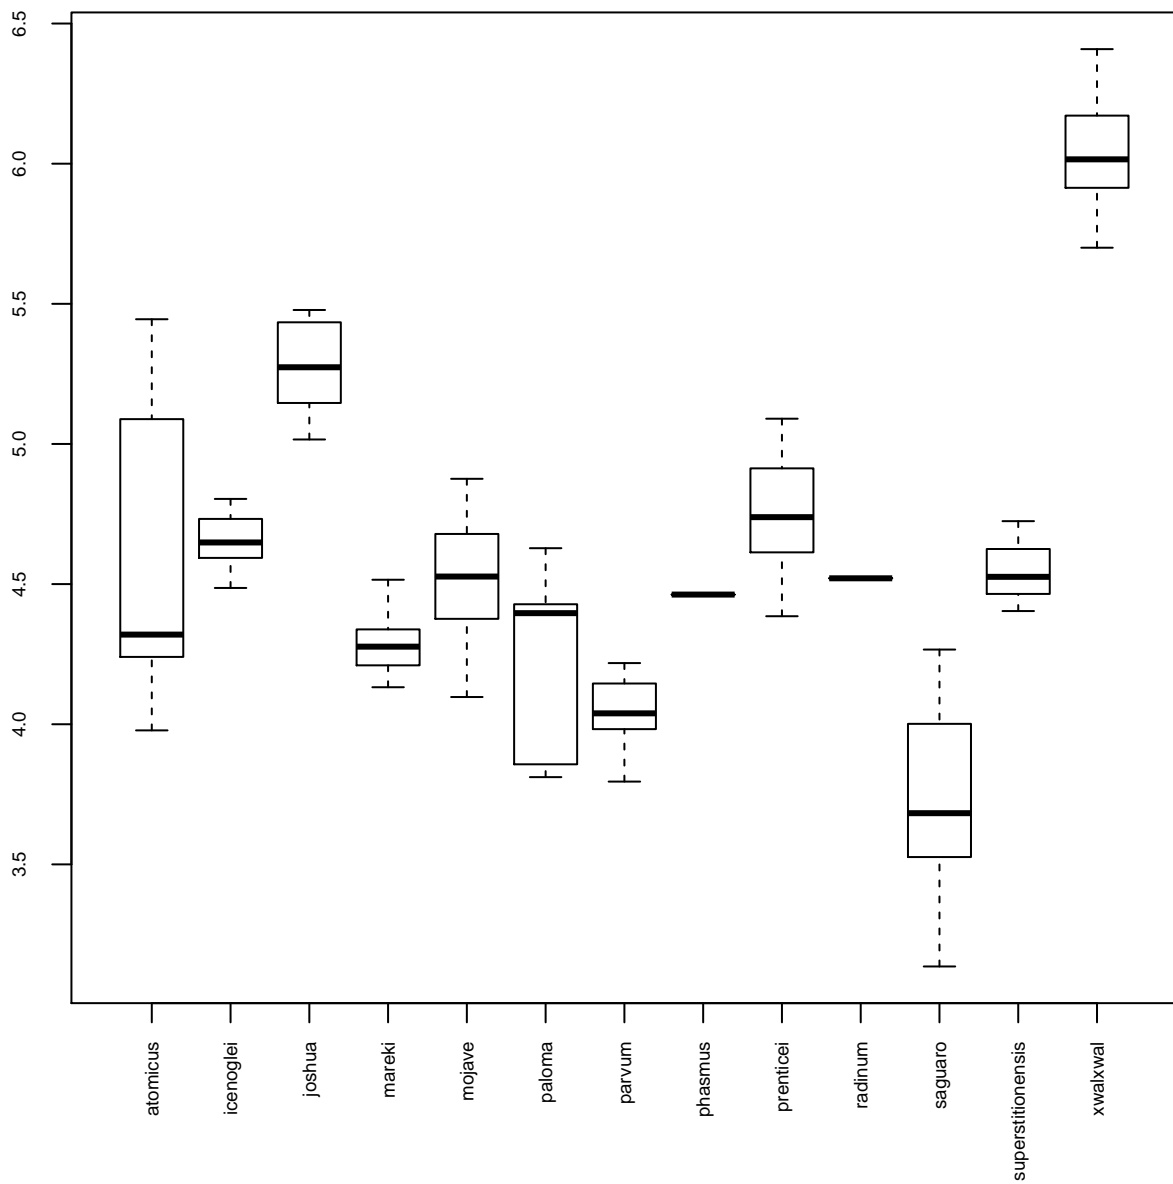

Supplement: Supplementary file 943

# Patella 3/Tibia 3 ratio – males

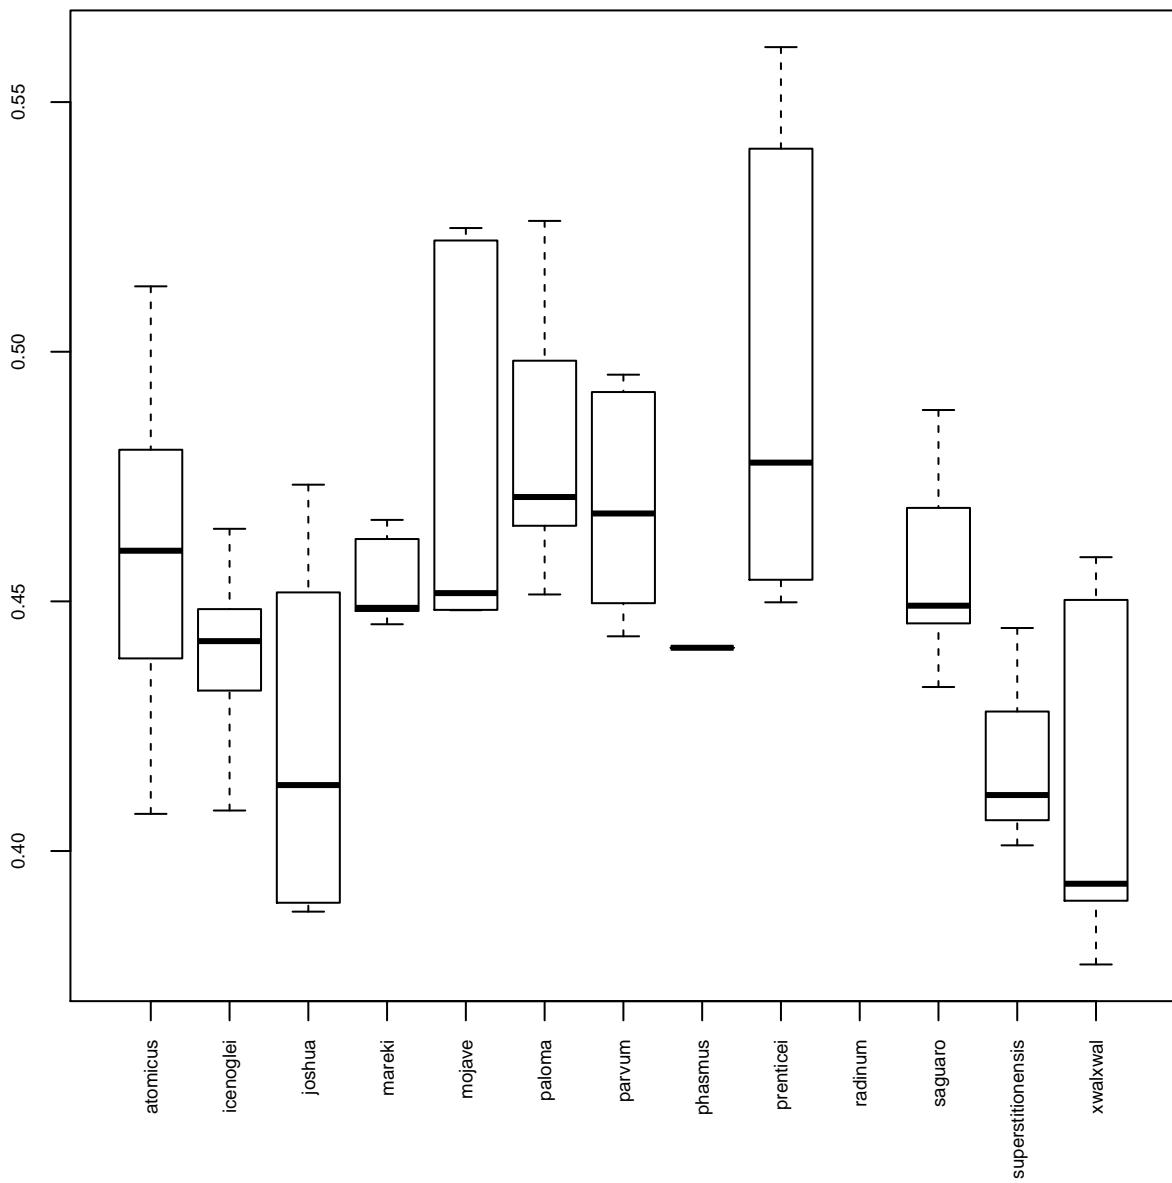

Supplement: Supplementary file 944

# Tibia 3/Metatarsus 4 Length ratio – males

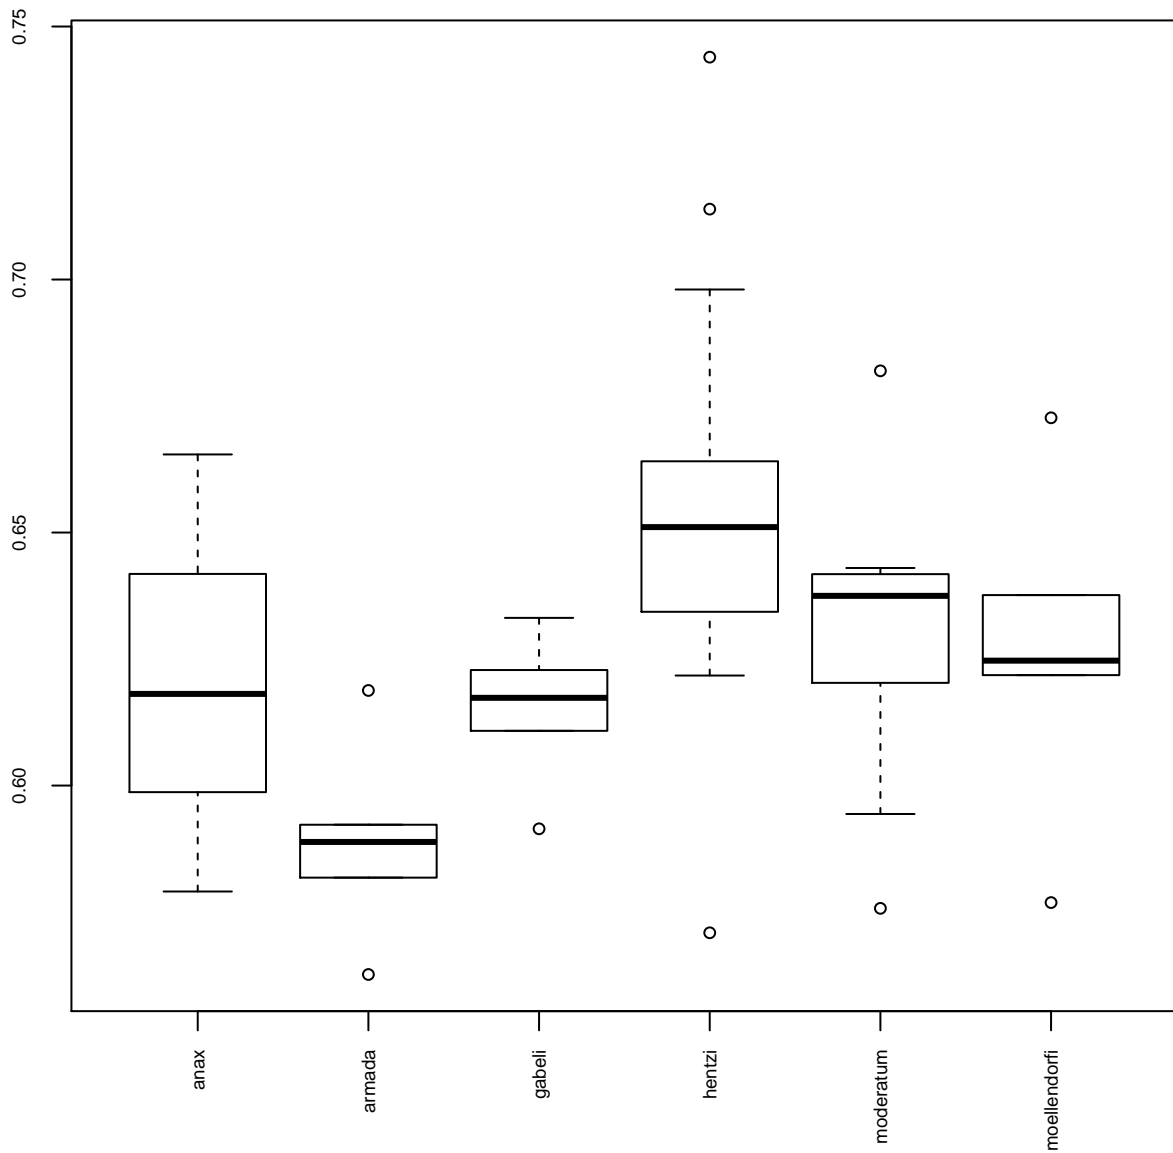

Supplement: Supplementary file 945

## Carapace Length/Tibia 3 ratio – females

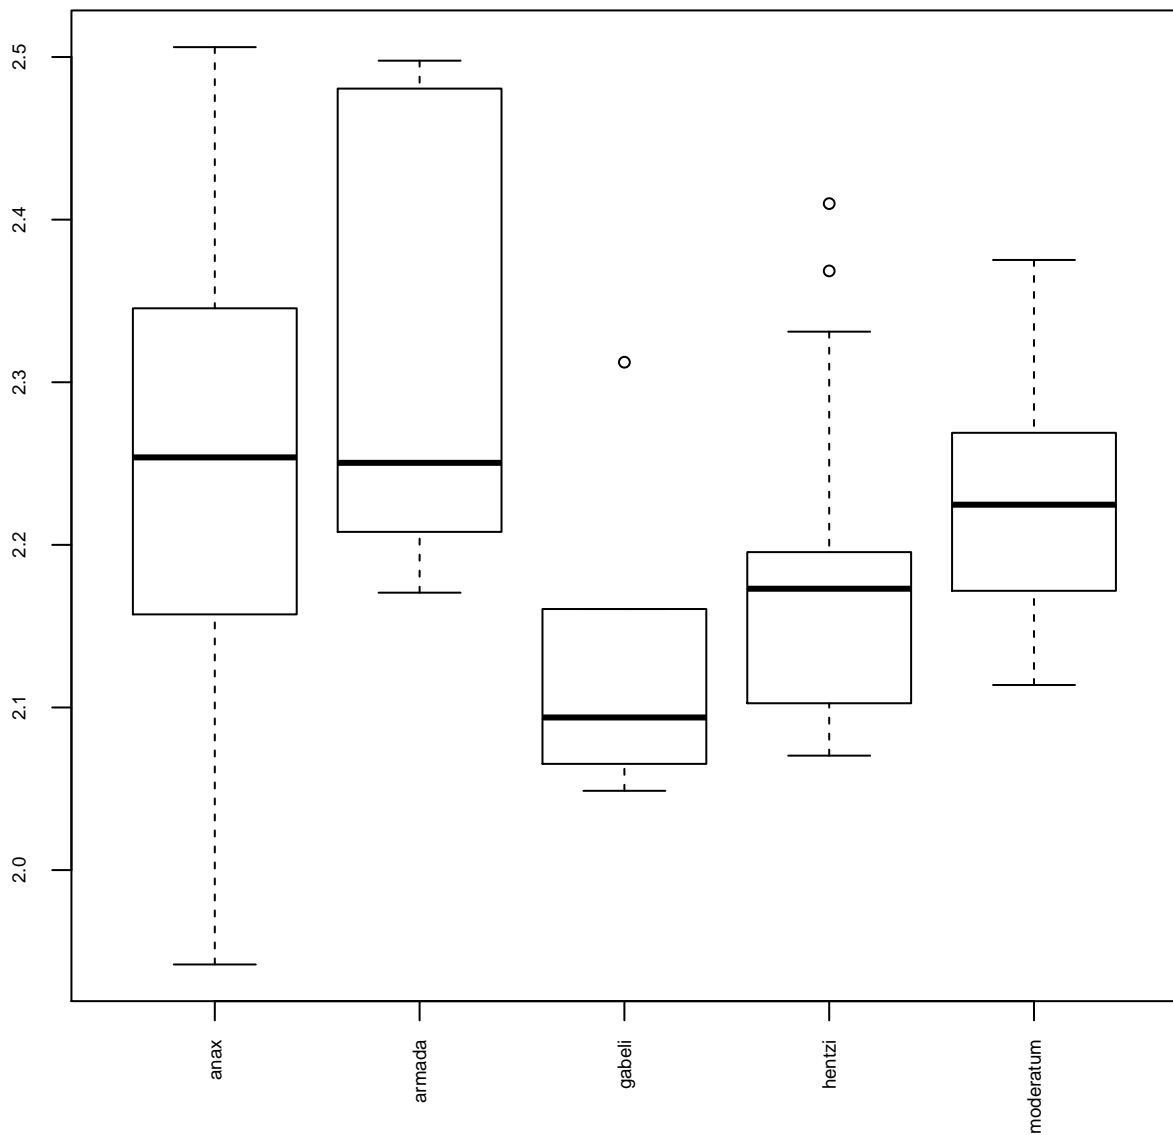

Supplement: Supplementary file 946

## Carapace Length/Tibia 3 ratio – males

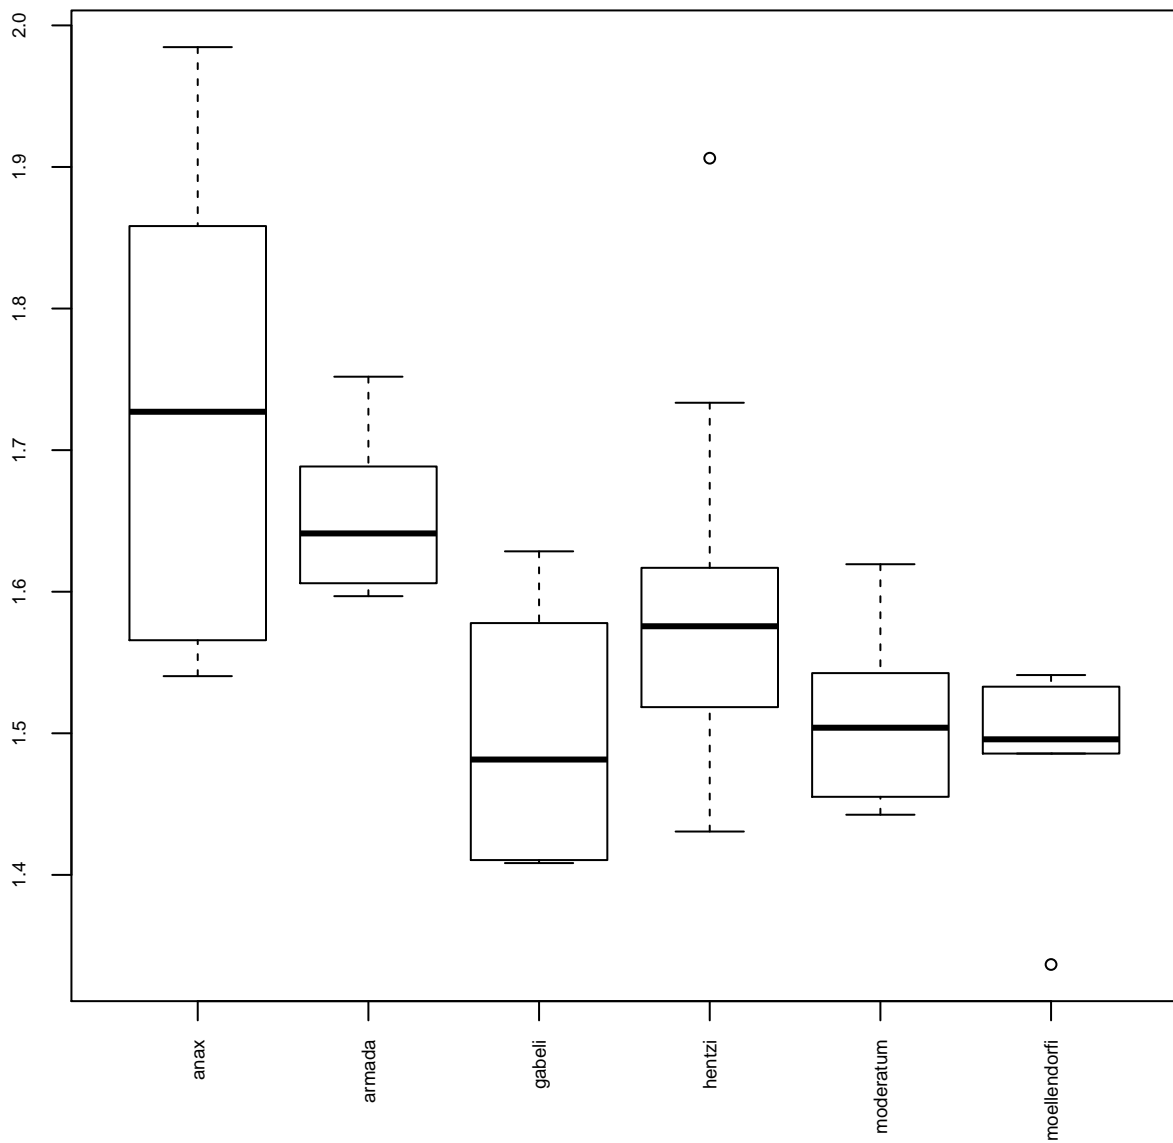

Supplement: Supplementary file 947

## Tarsus 1/Metatarsus 4 Length ratio – males

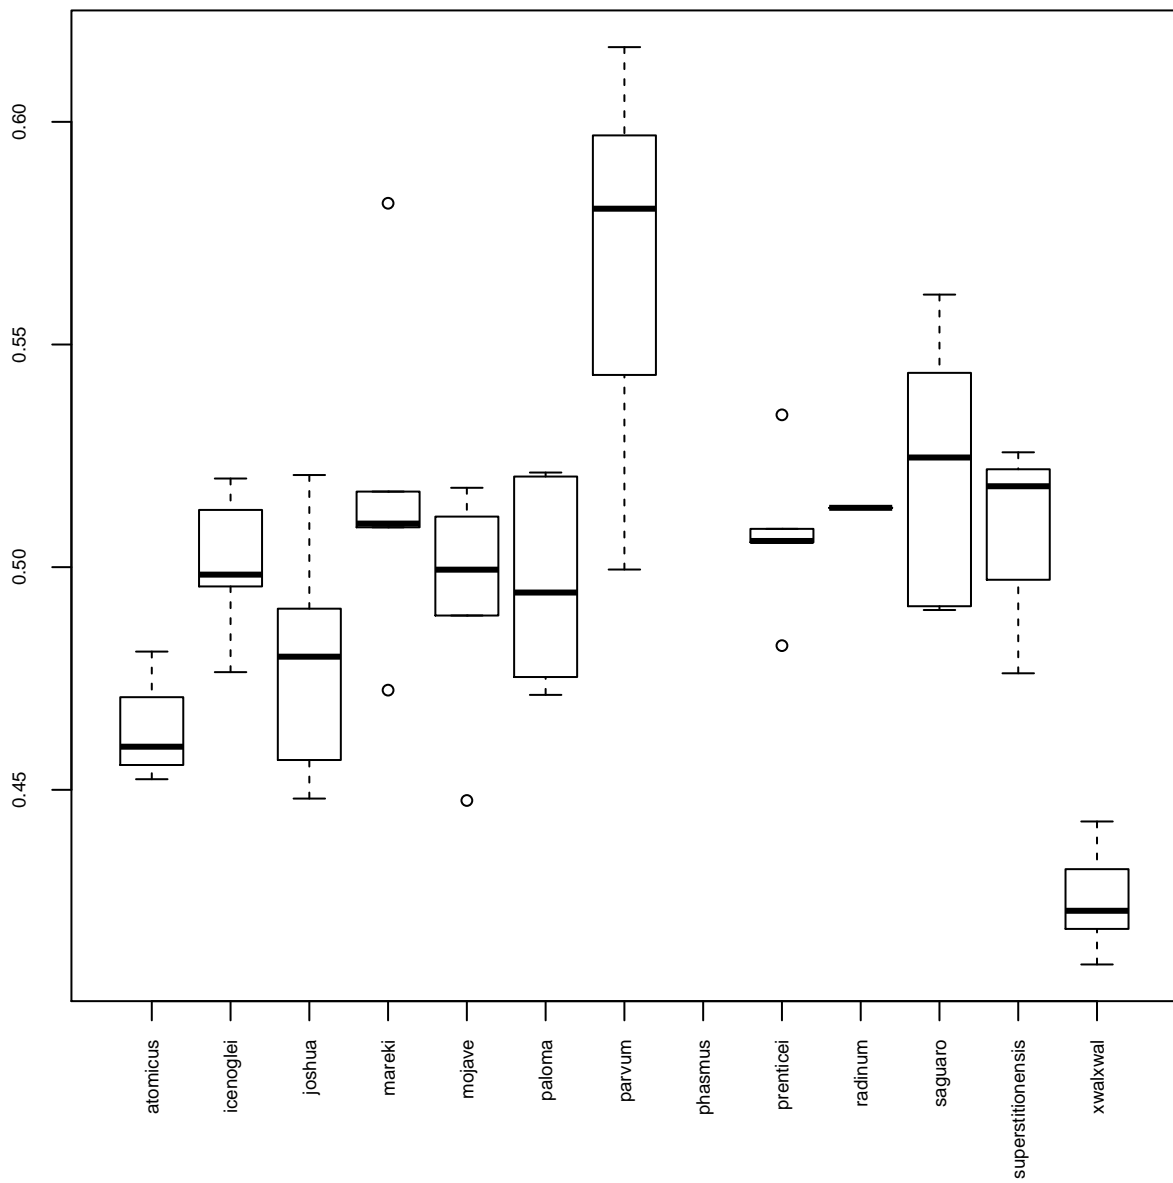

Supplement: Supplementary file 948

## Tarsus 1/Tarsus 4 ratio – females

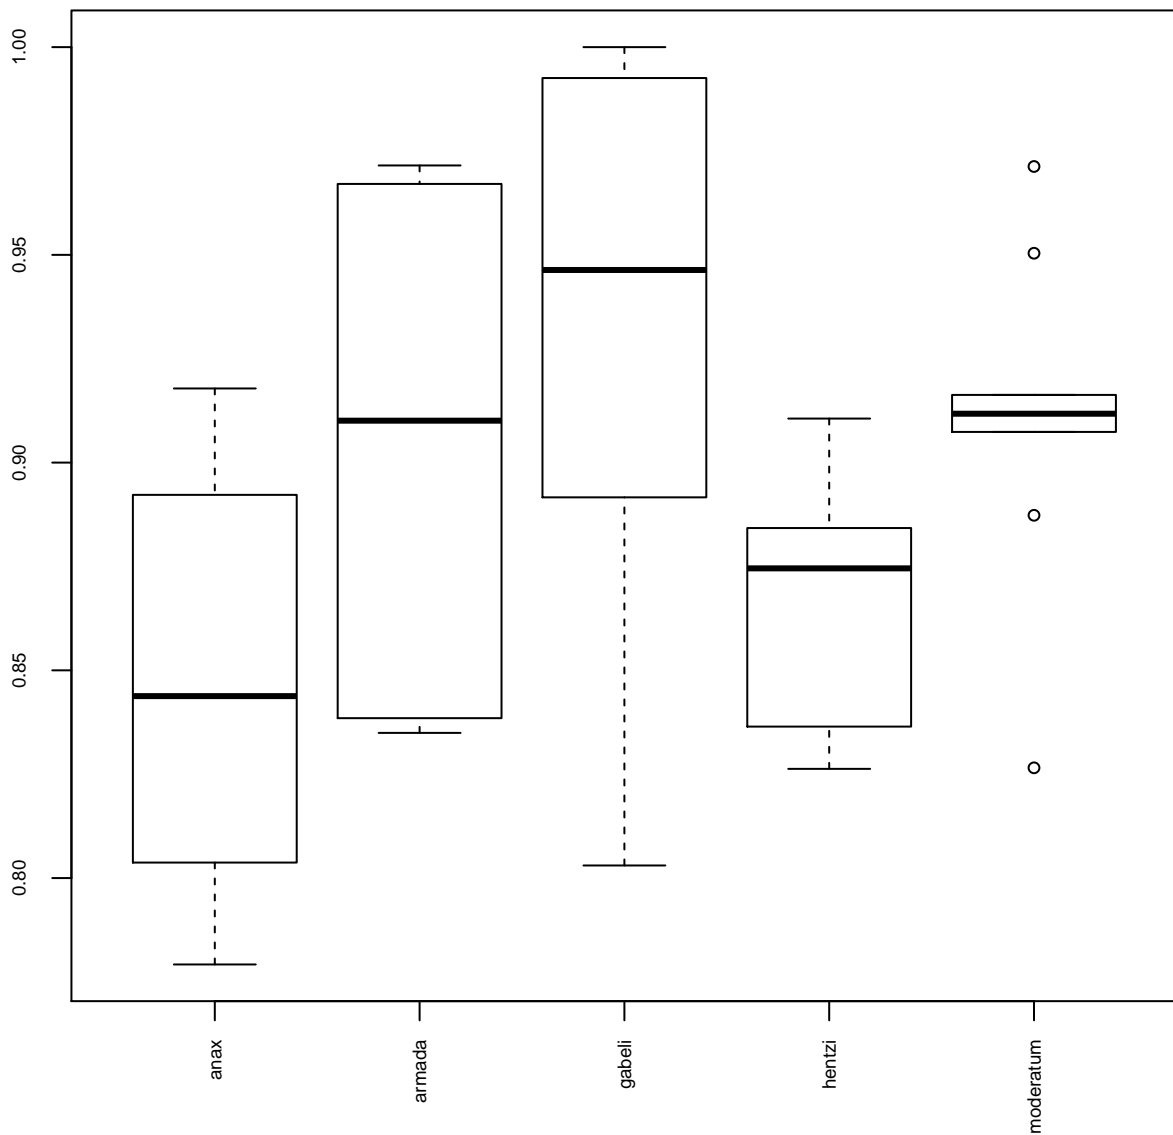

Supplement: Supplementary file 949

## Metatarsus 1/Tibia 3 Length ratio – females

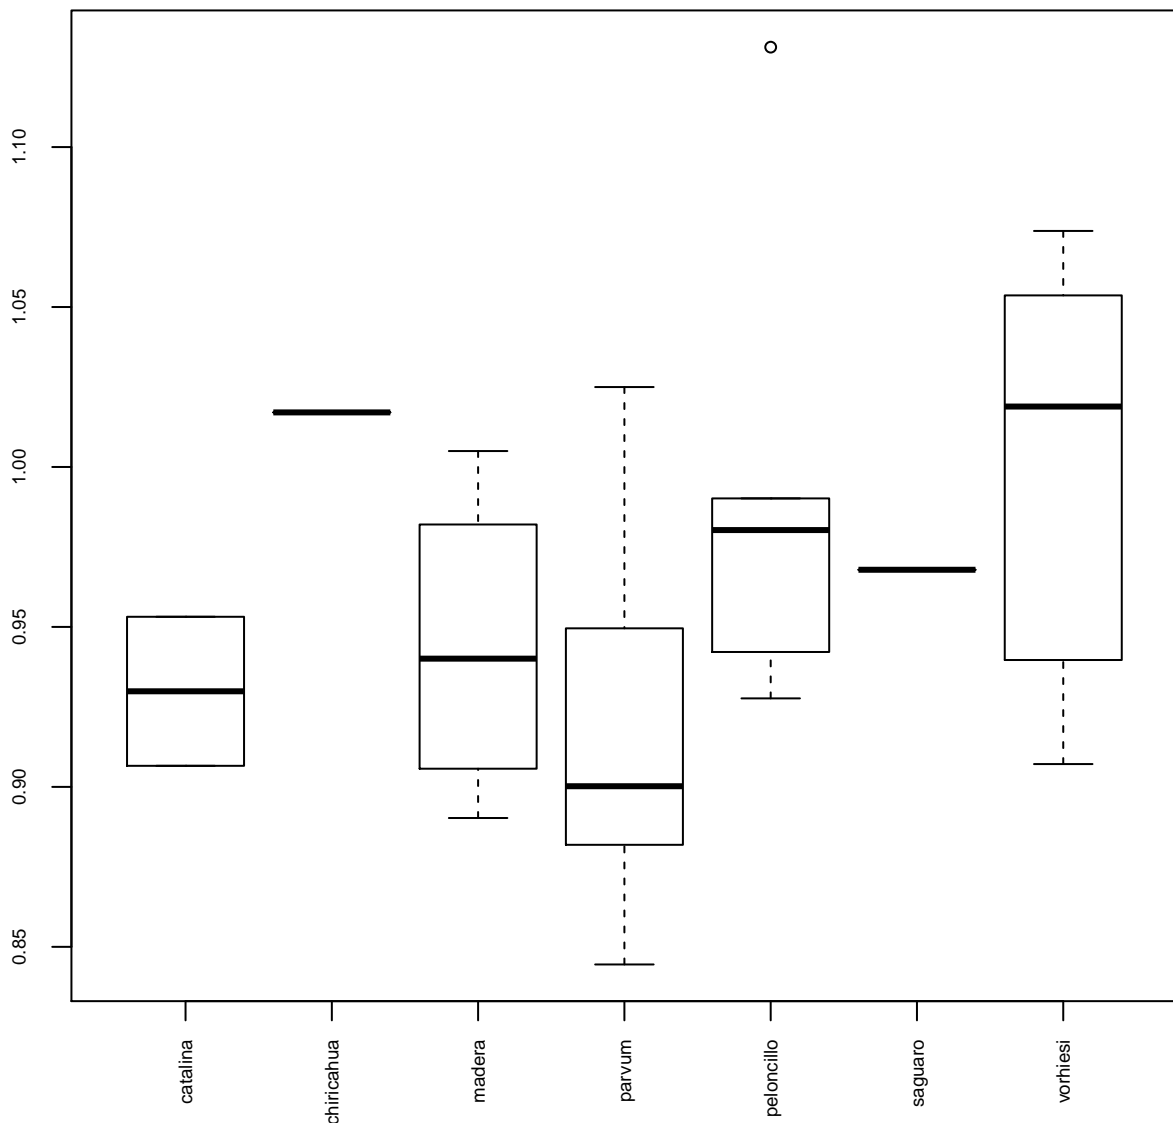

Supplement: Supplementary file 950

# Tarsus 1/Patella 3 Length ratio – males

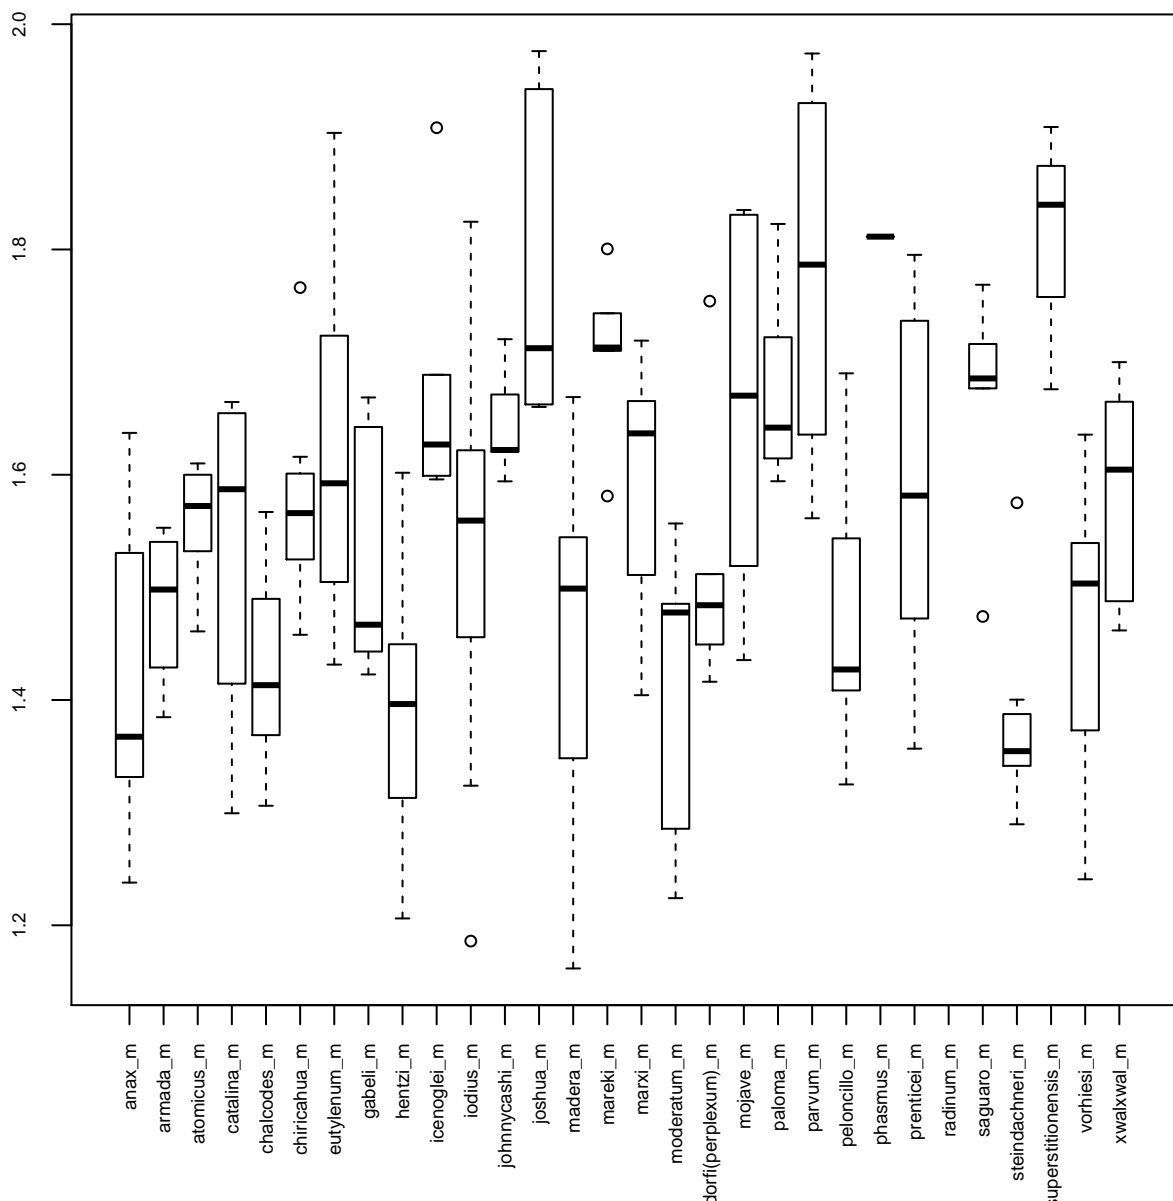

Supplement: Supplementary file 951

## Carapace Length/Femur 4 ratio – males

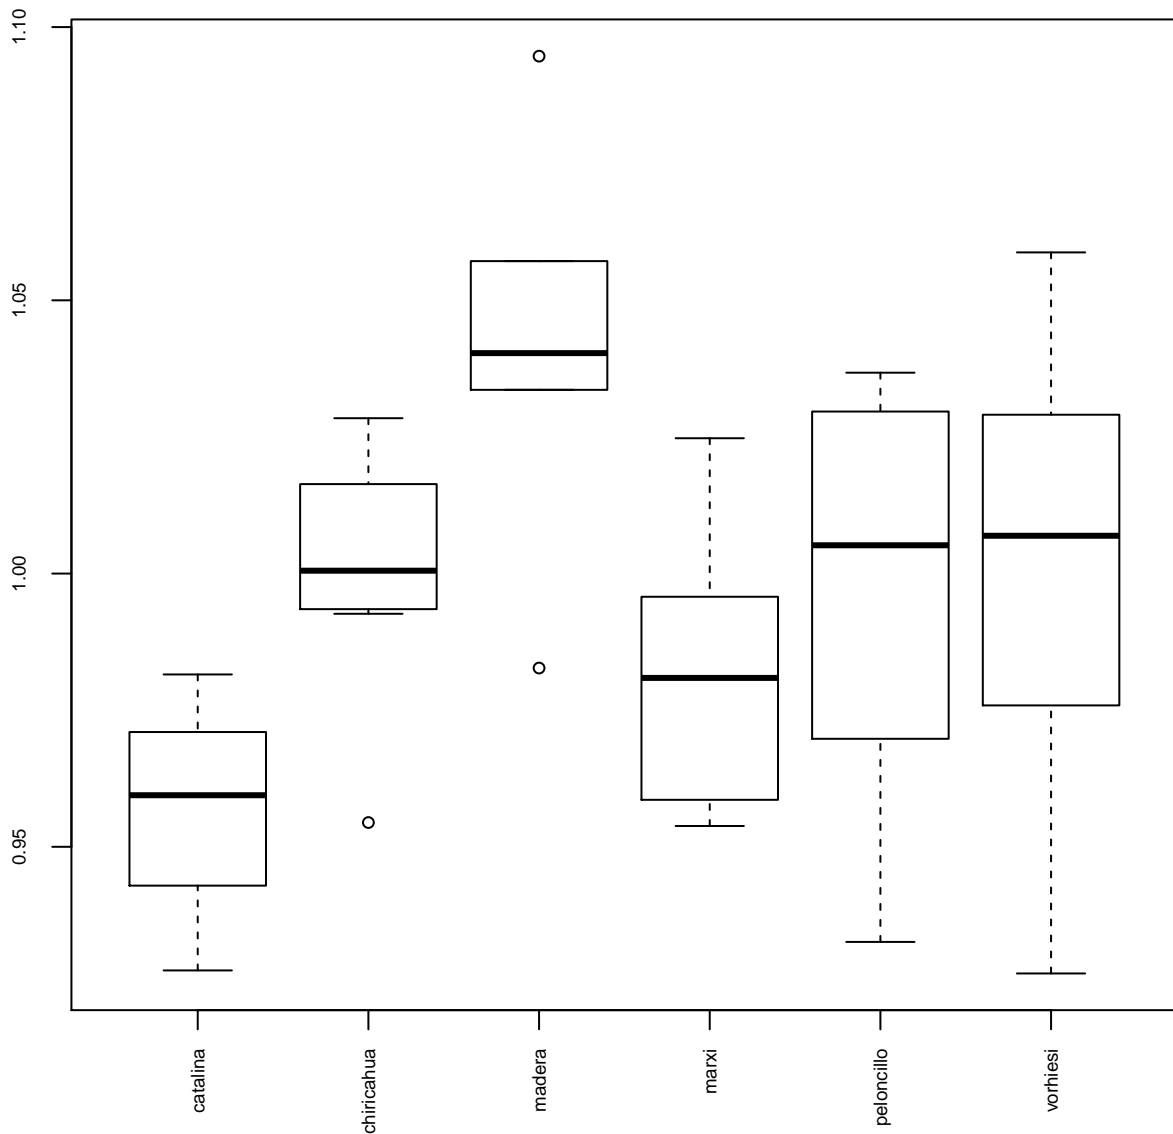

Supplement: Supplementary file 952

## Leg 3 Length – females

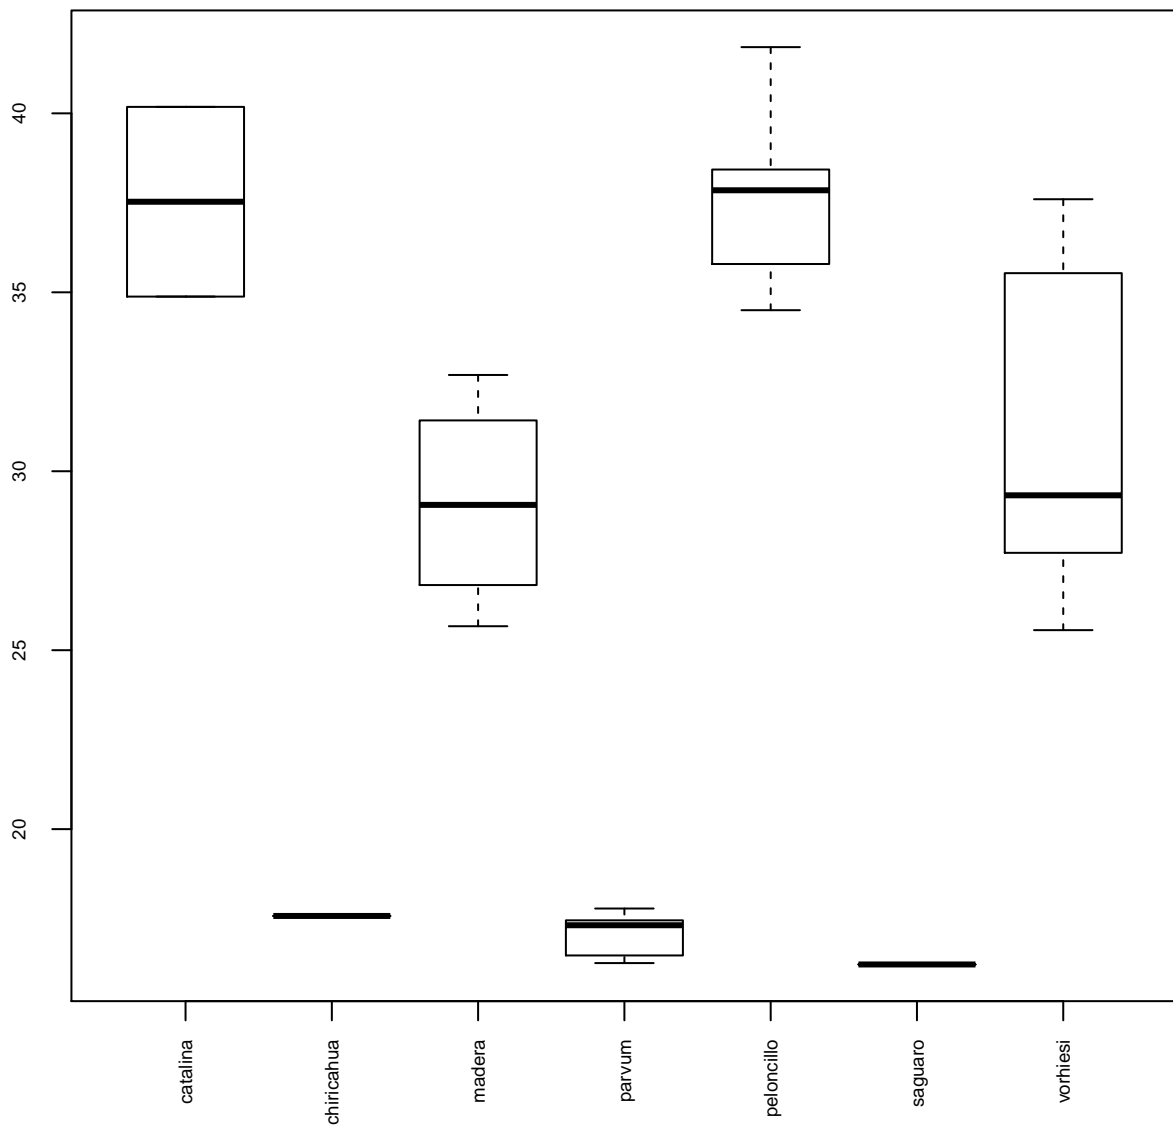

Supplement: Supplementary file 953

# Metatarsus 1/Tarsus 3 Length ratio – males

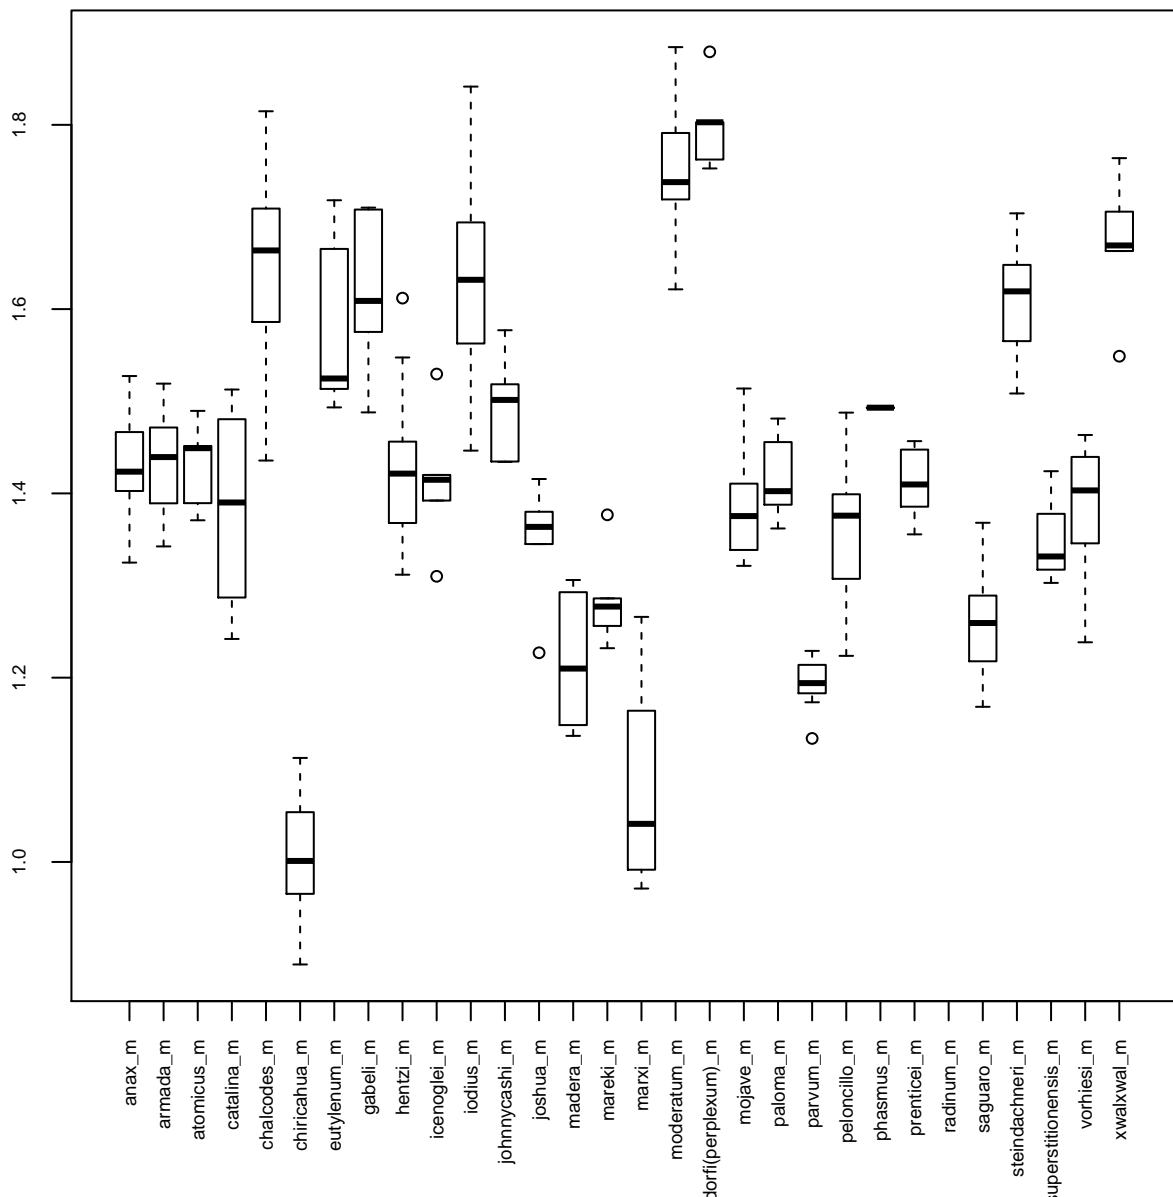

Supplement: Supplementary file 954

## Patella 1/Metatarsus 3 Length ratio – males

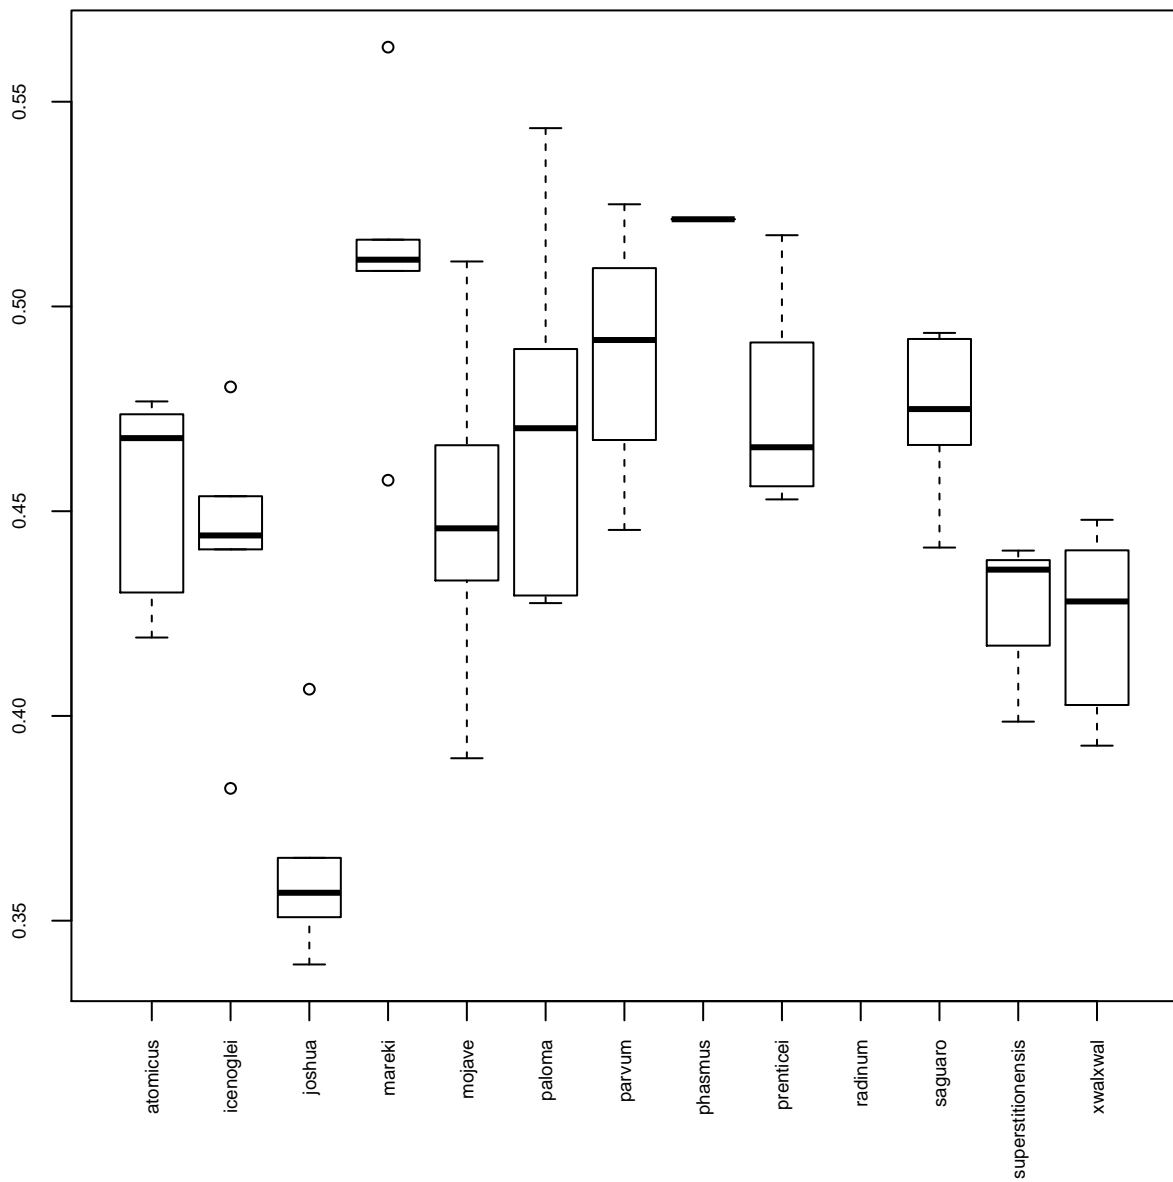

Supplement: Supplementary file 955

## Tarsus 1/Tarsus 4 ratio – males

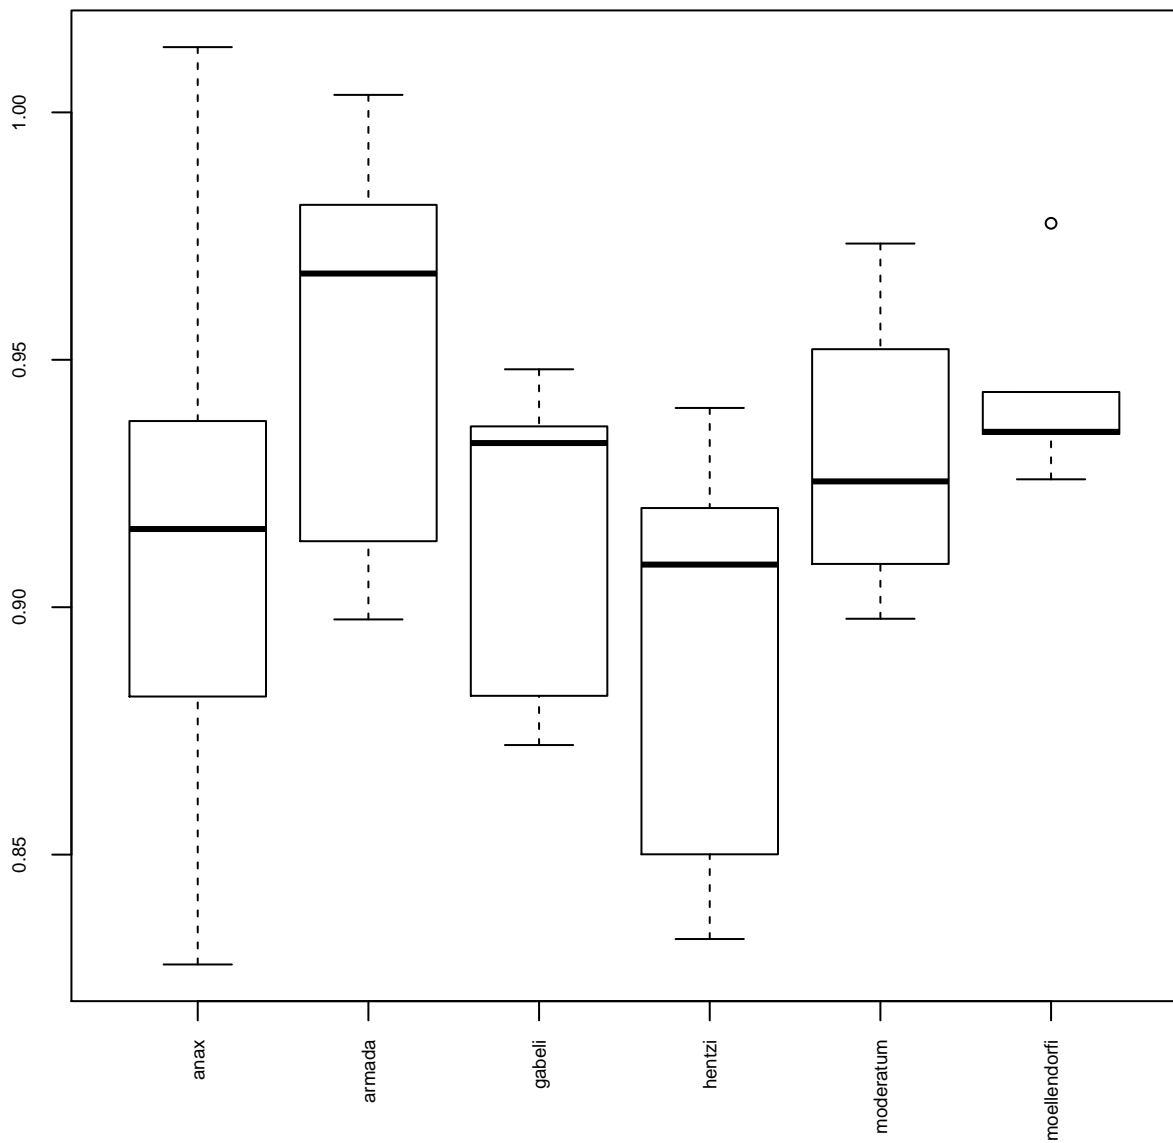

Supplement: Supplementary file 956

## Tarsus 3/Metatarsus 4 Length ratio – males

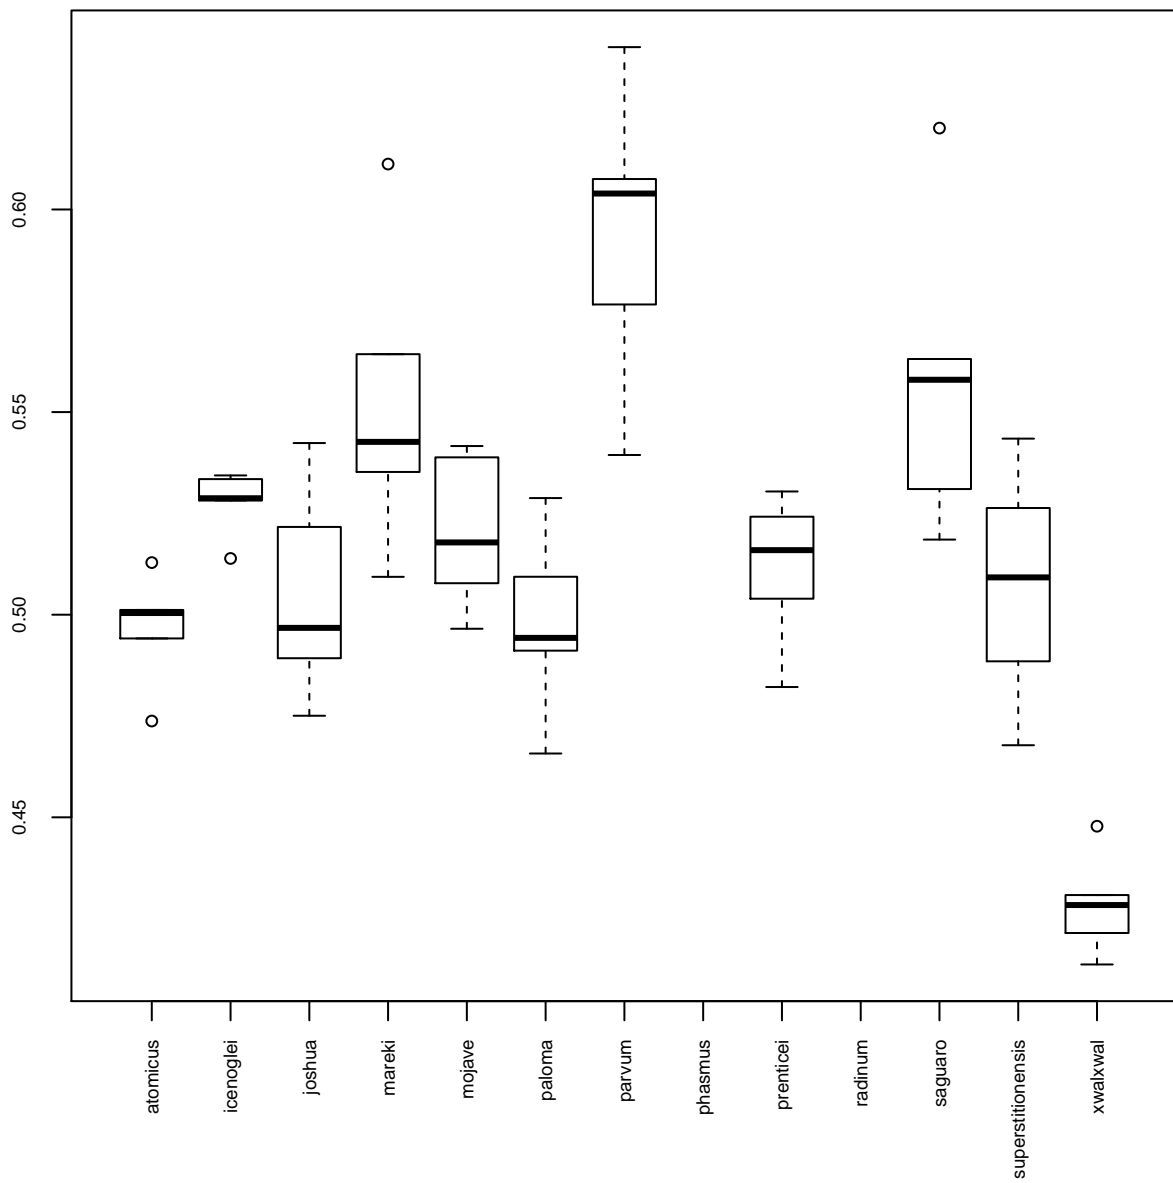

Supplement: Supplementary file 957

## Patella 4/Tibia 4 ratio – females

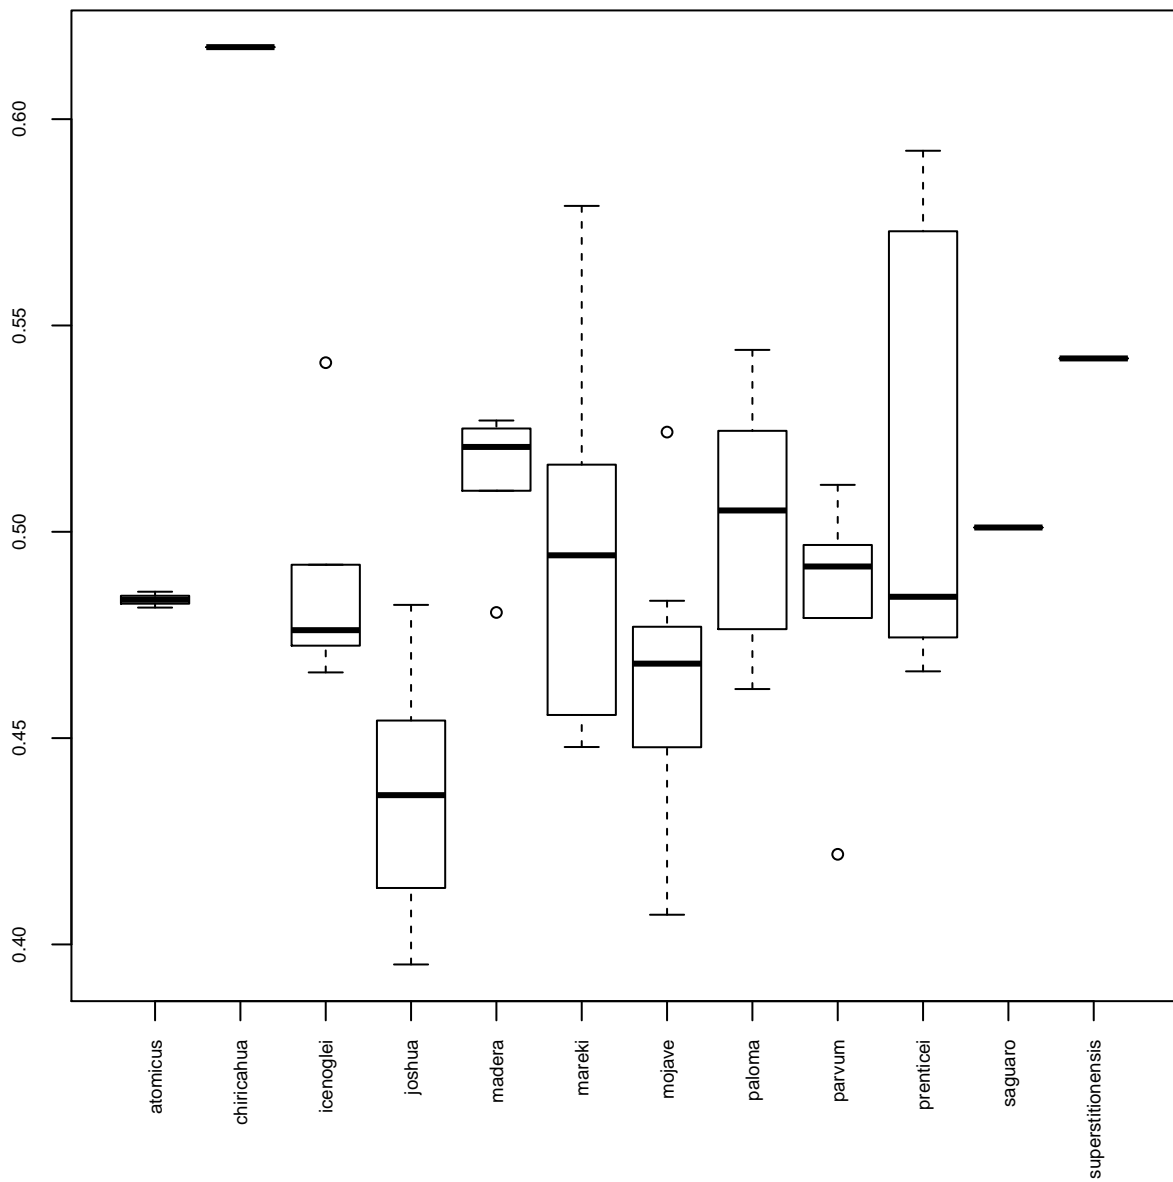

Supplement: Supplementary file 958

## Tibia 4/Tarsus 4 ratio – males

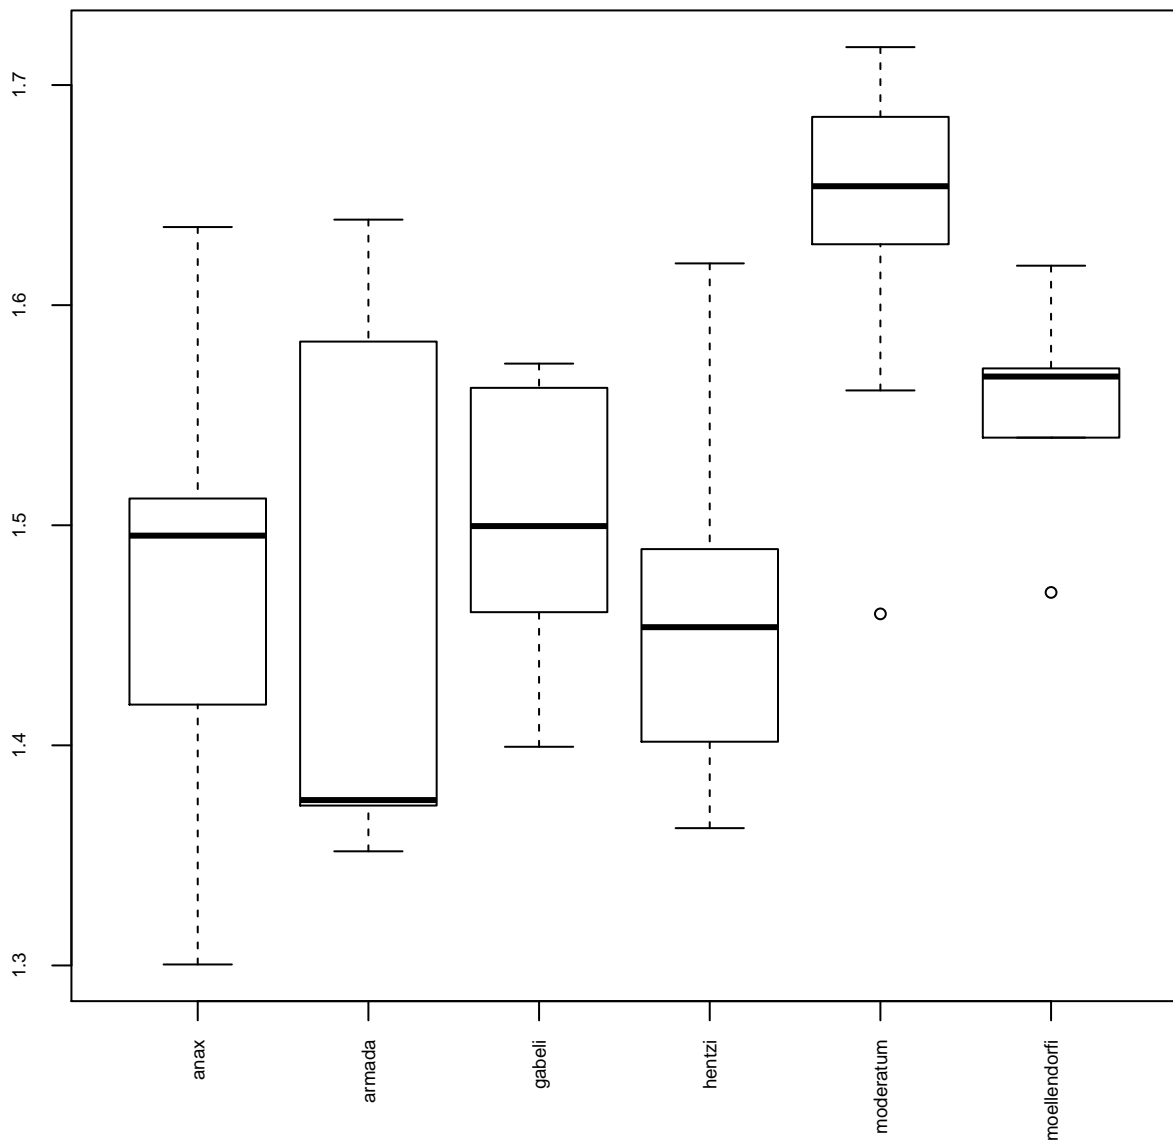

Supplement: Supplementary file 959

# Femur 3/Tarsus 4 Length ratio – females

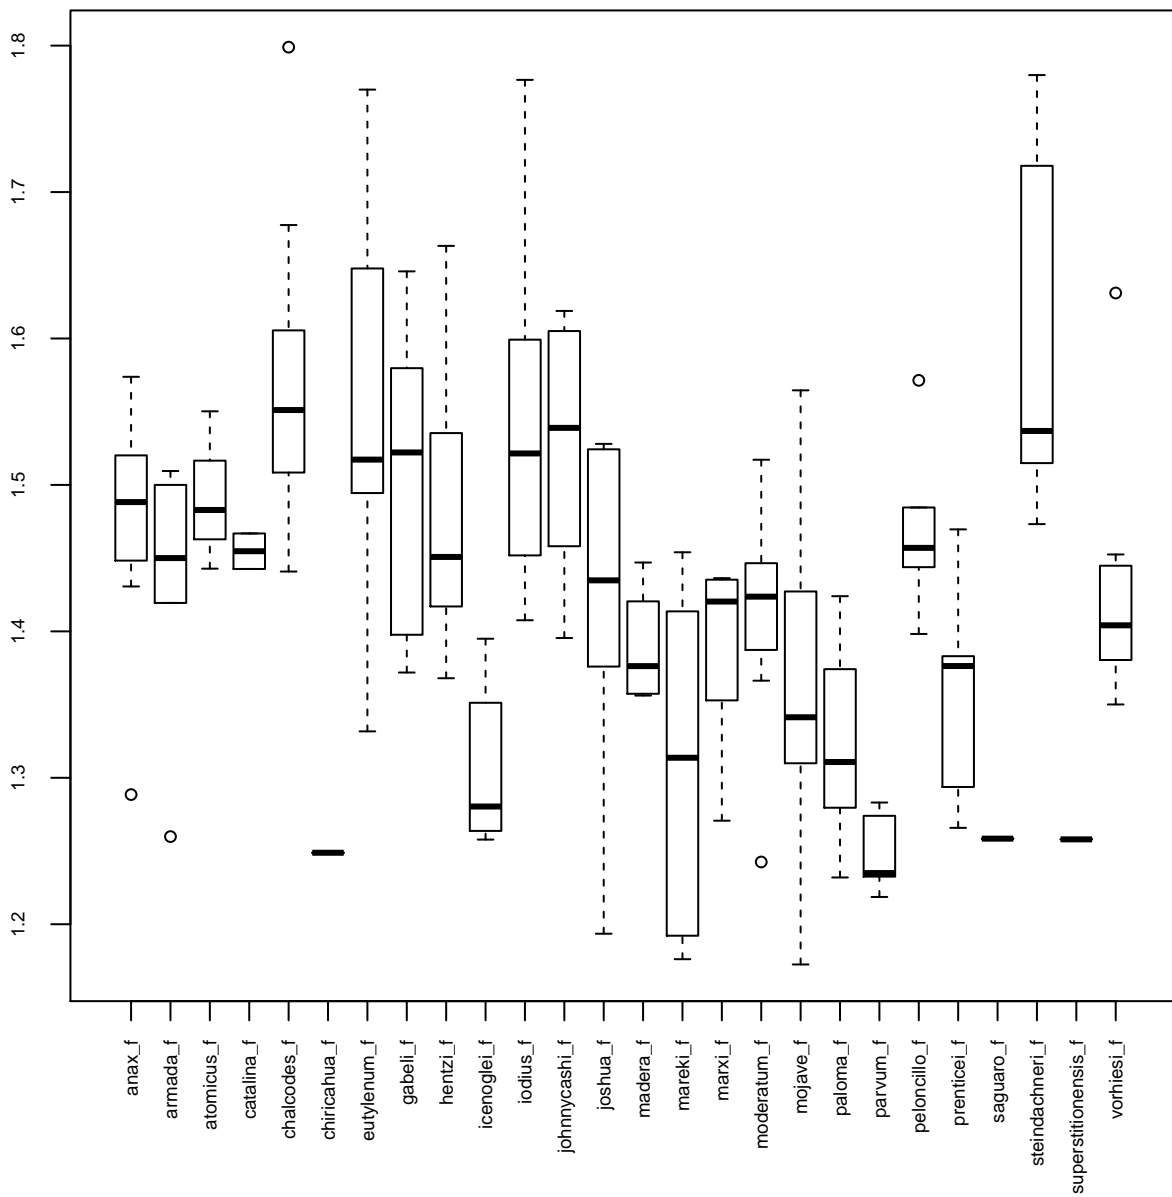

Supplement: Supplementary file 960

# Tibia 1/Metatarsus 3 Length ratio – males

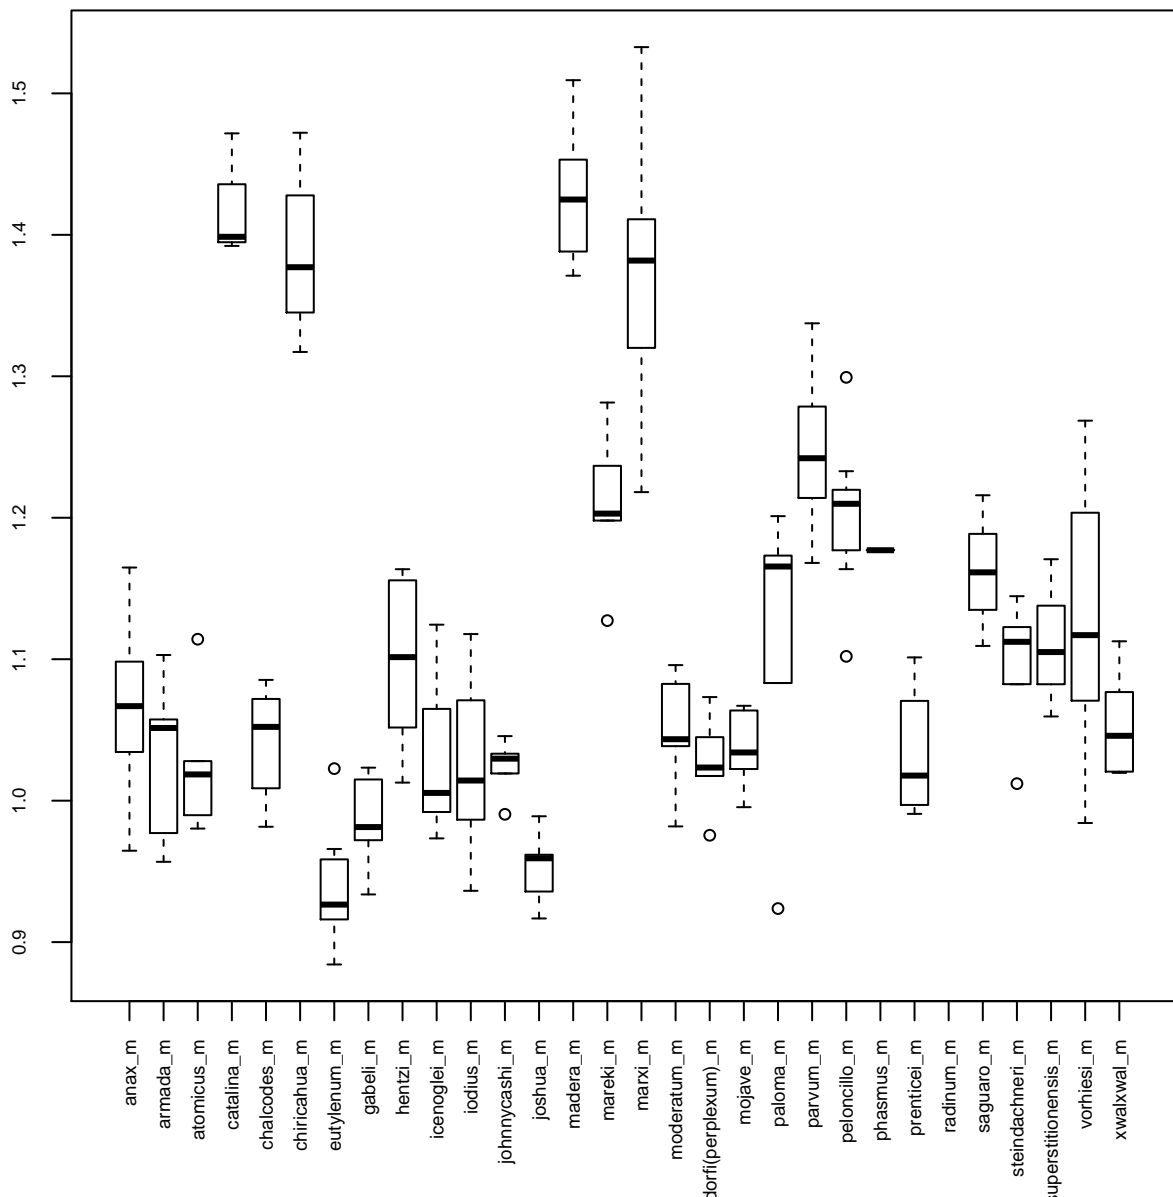

Supplement: Supplementary file 961

# Patella 1/Patella 4 ratio – males

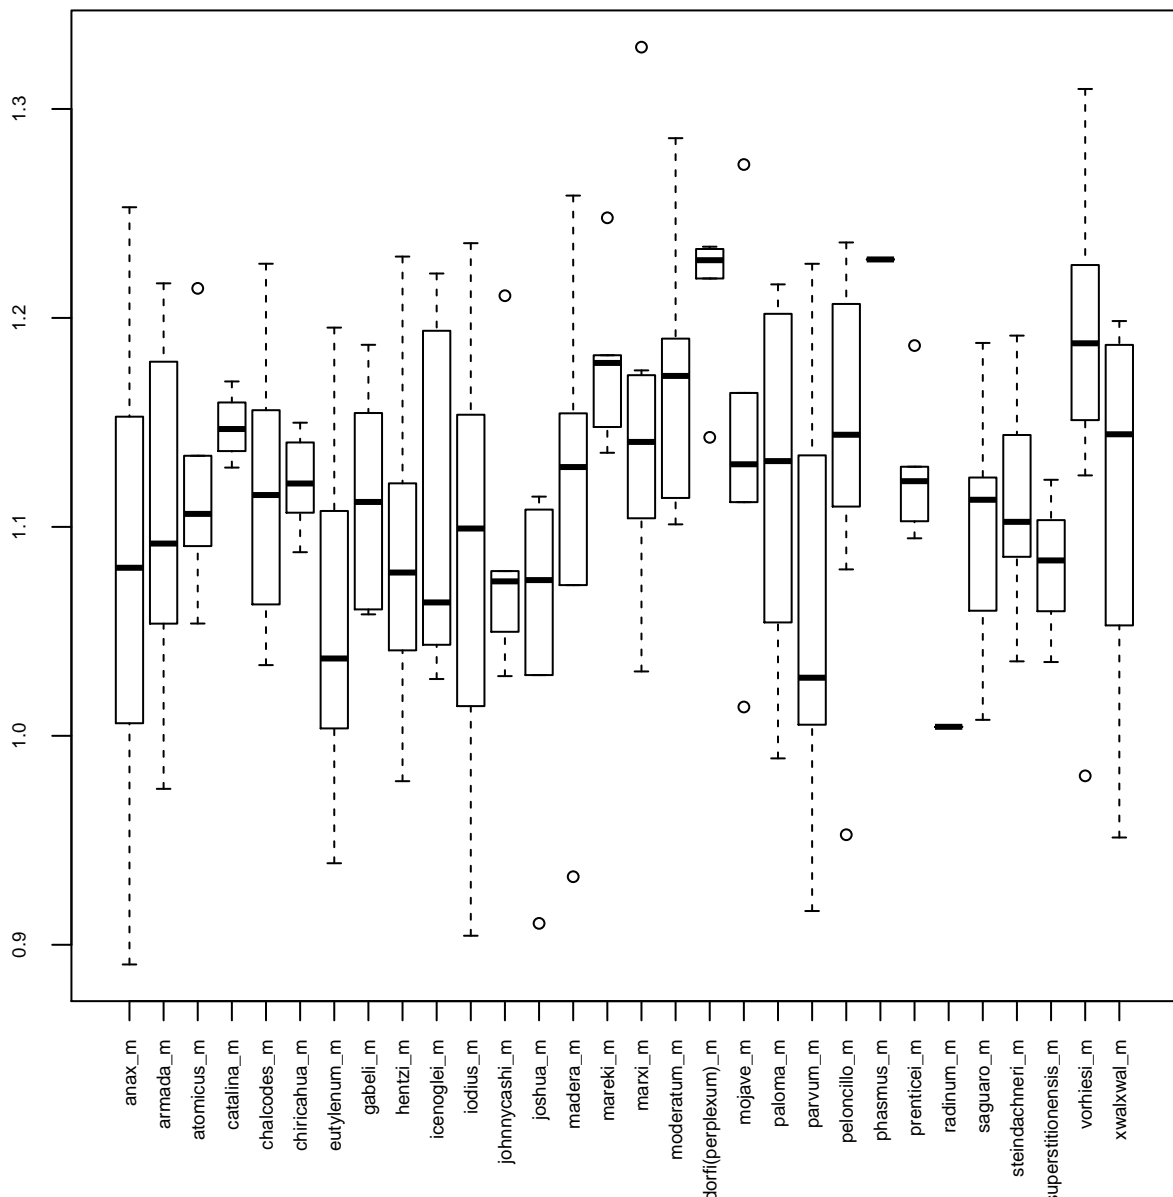

Supplement: Supplementary file 962

## Metatarsus 3/Femur 4 Length ratio – males

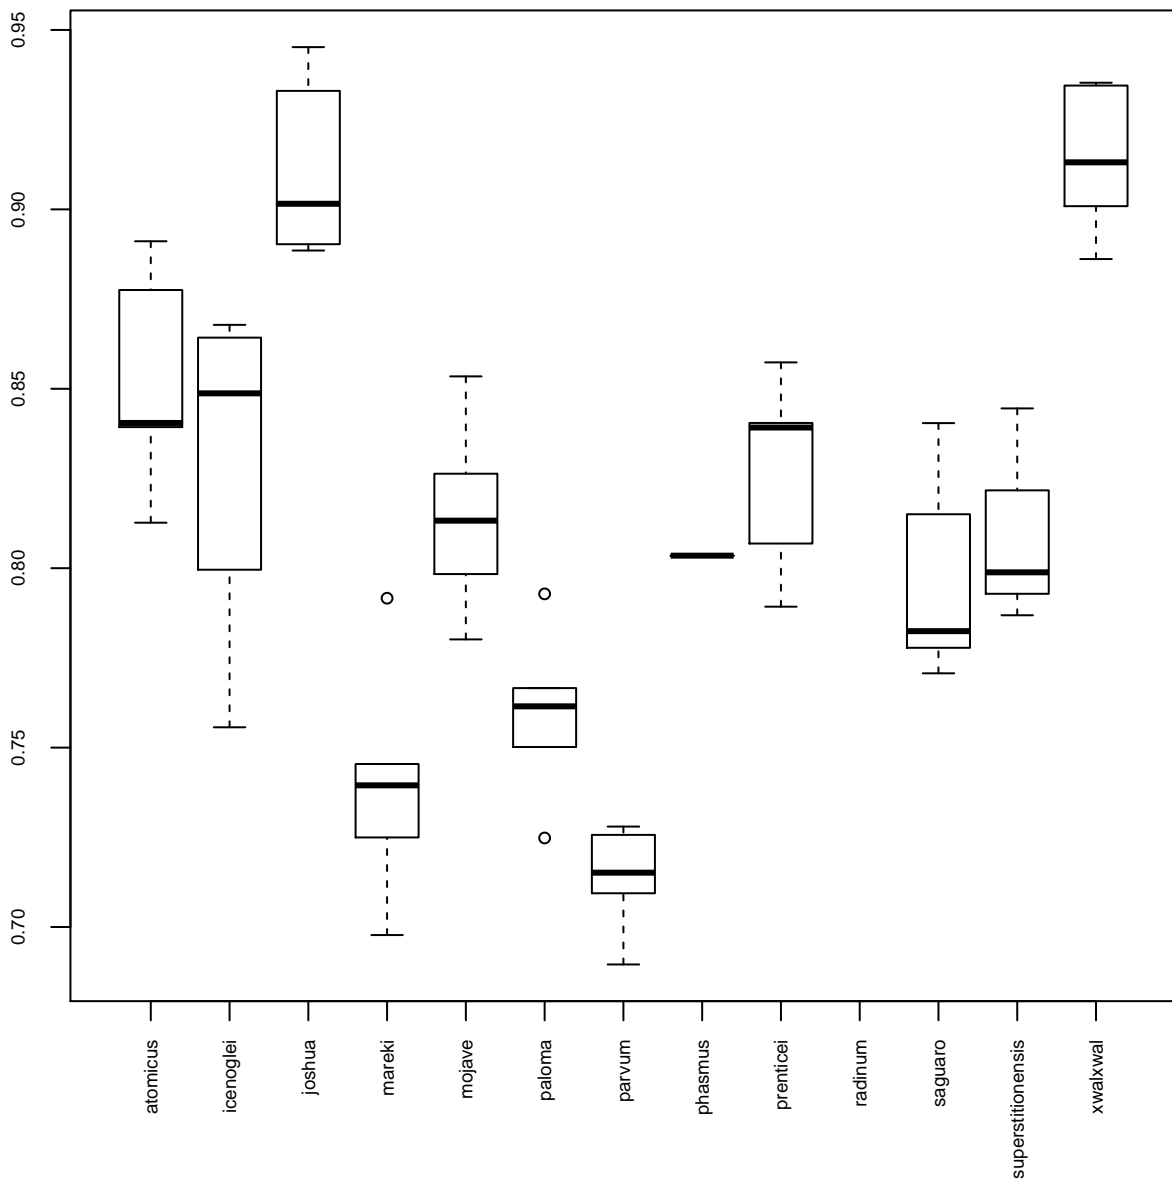

Supplement: Supplementary file 963

# Tibia 1/Femur 3 Length ratio – males

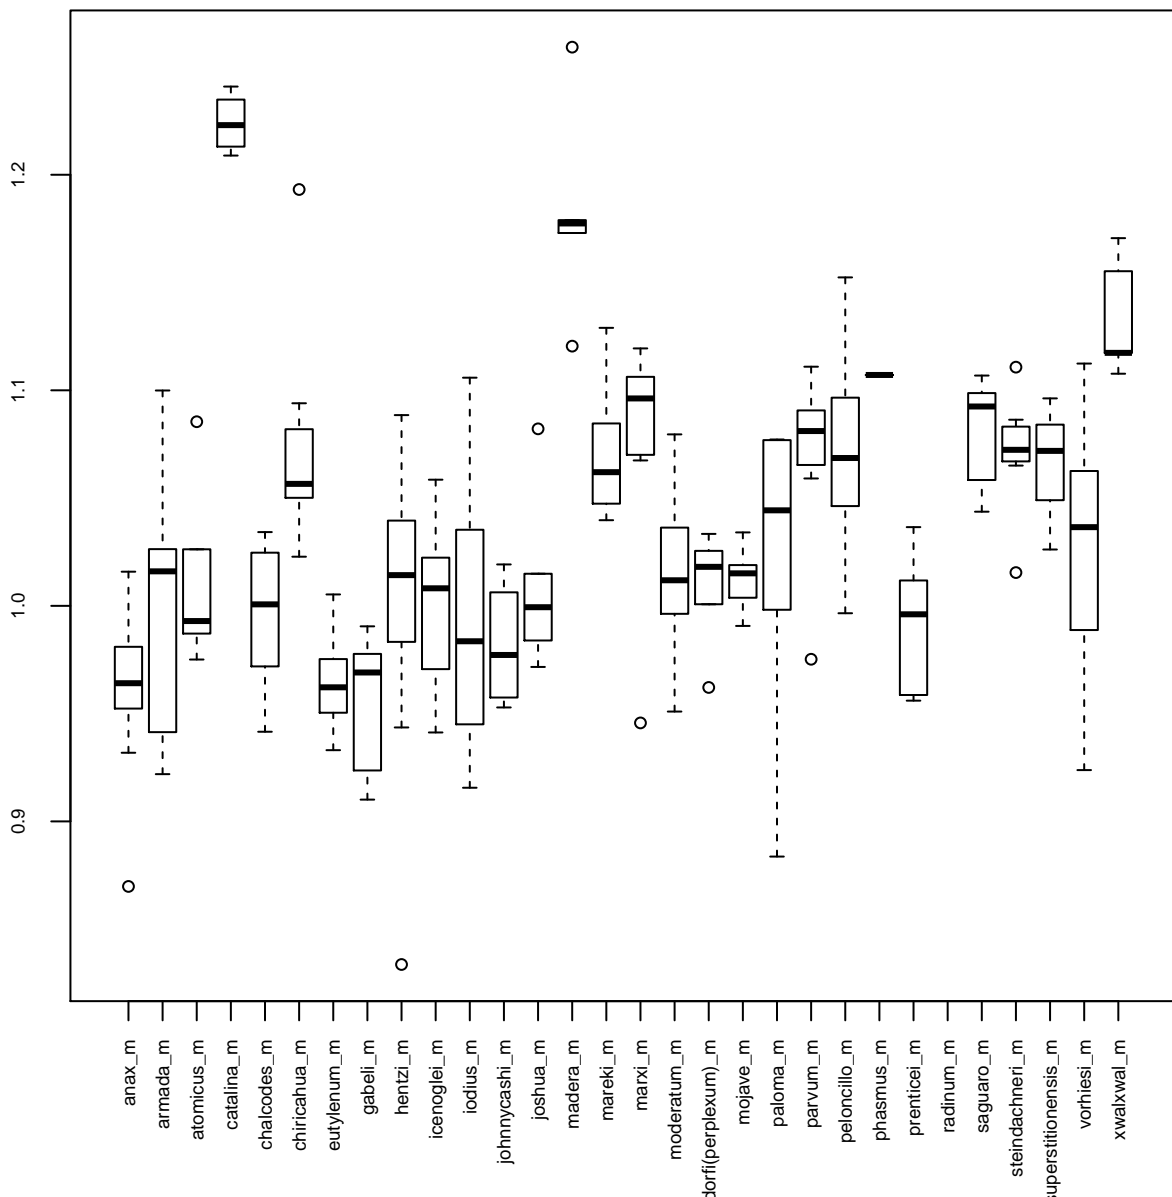

Supplement: Supplementary file 964

# Carapace Length/Tibia 3 ratio – males

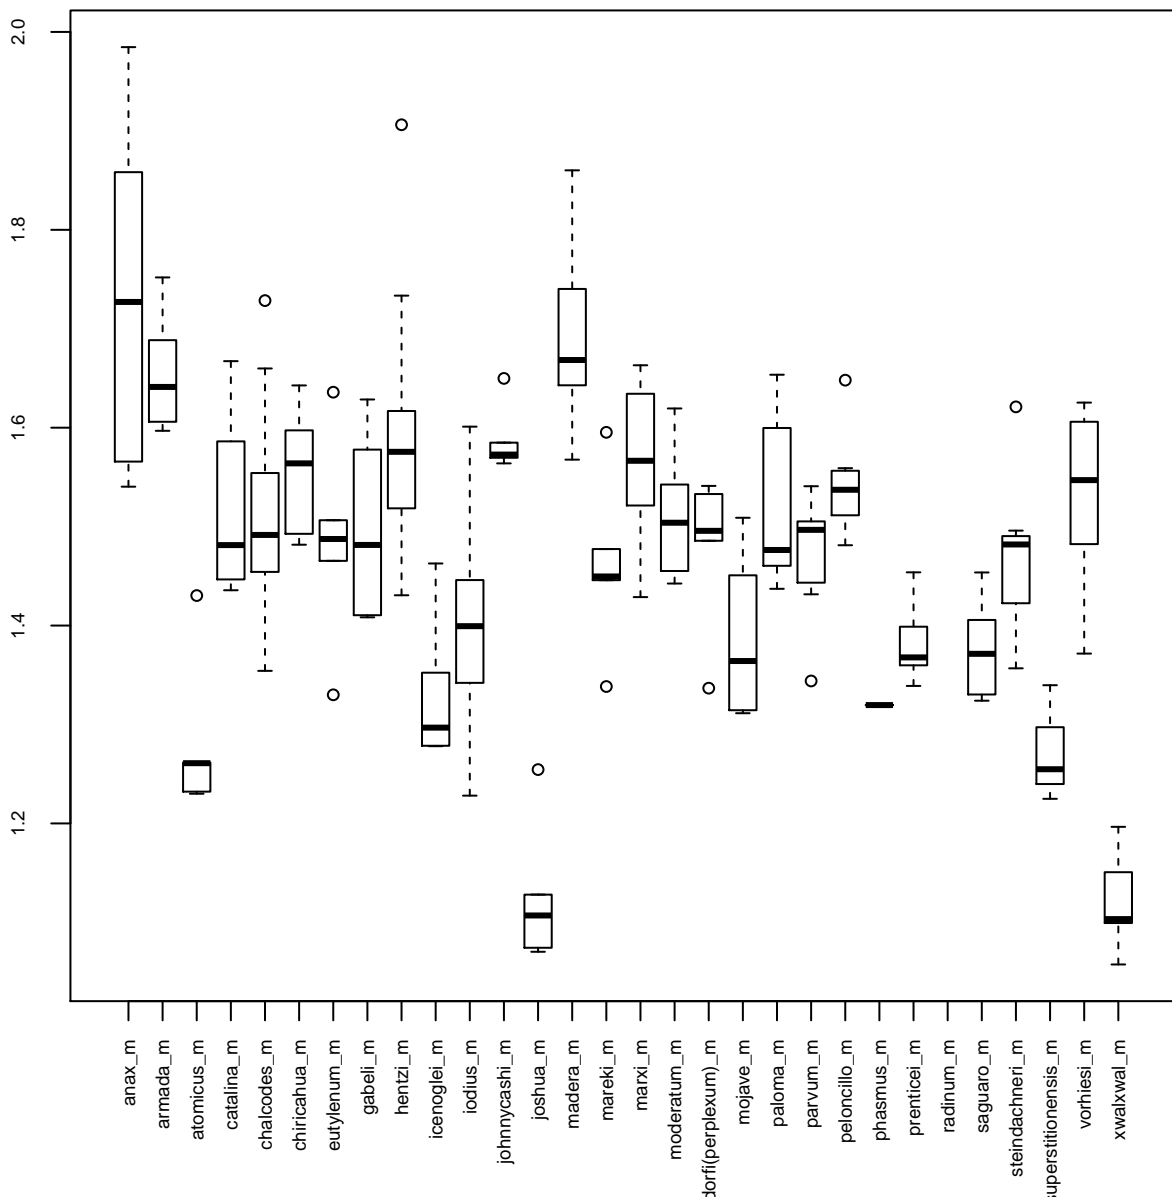

Supplement: Supplementary file 965

## Leg 3/Leg 4 Length ratio – females

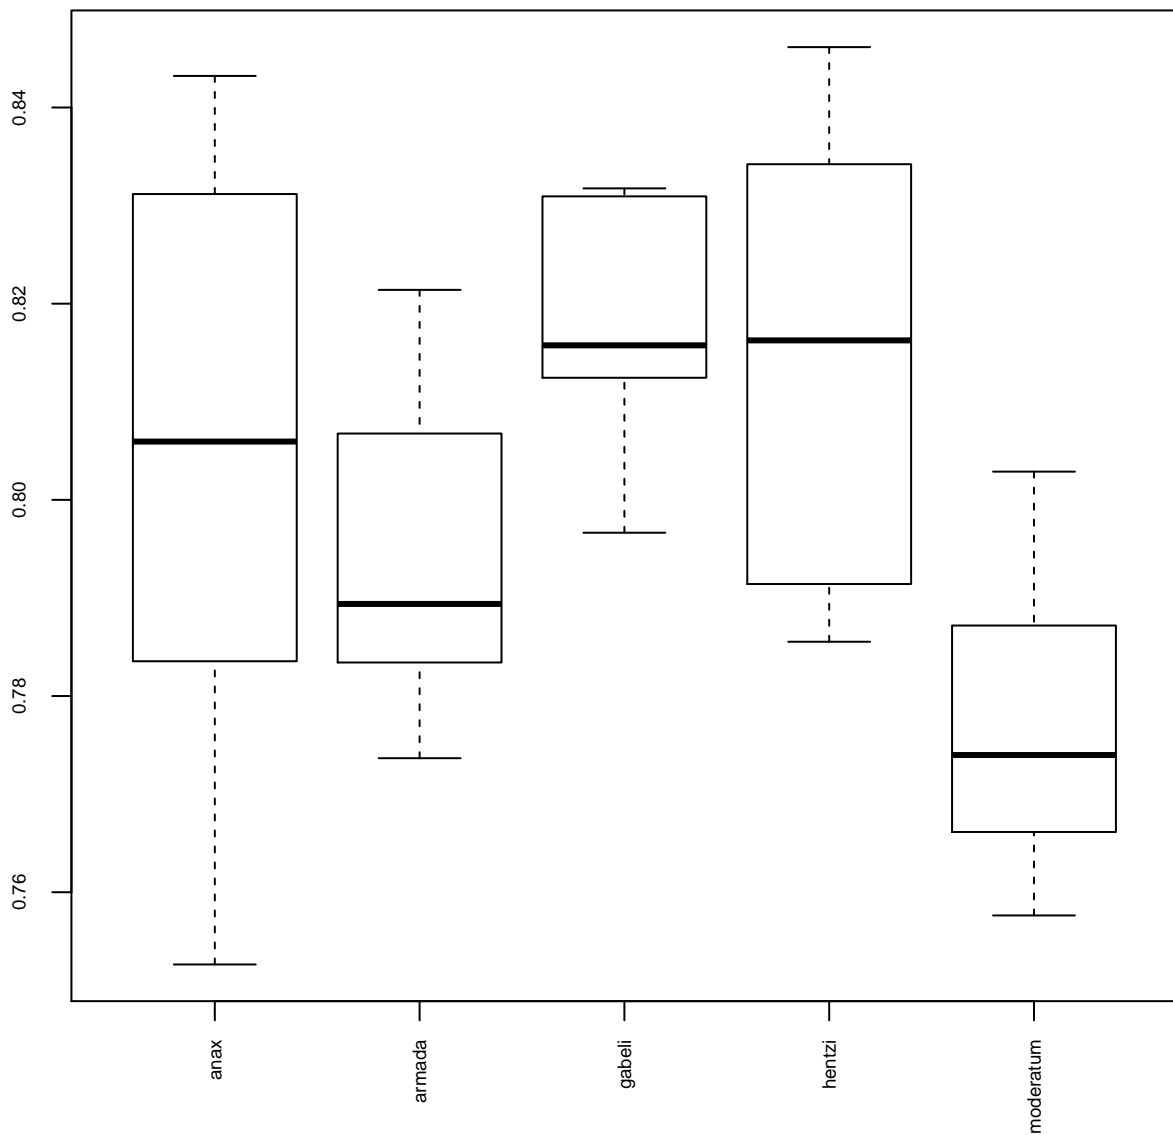

Supplement: Supplementary file 966

## Patella 3/Femur 4 Length ratio – males

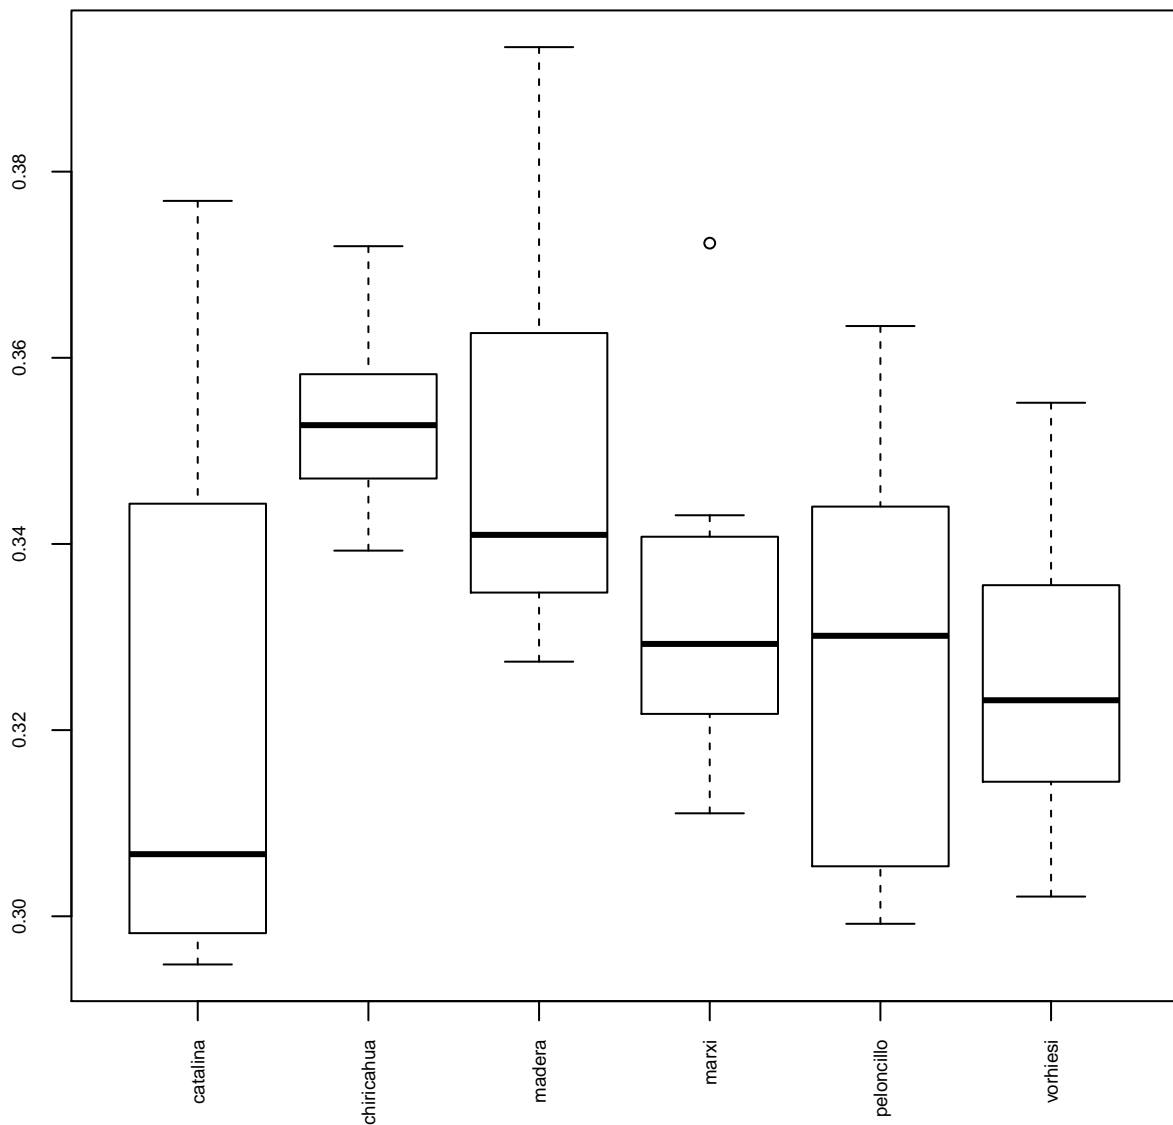

Supplement: Supplementary file 967

## Tarsus 1/Femur 4 Length ratio – males

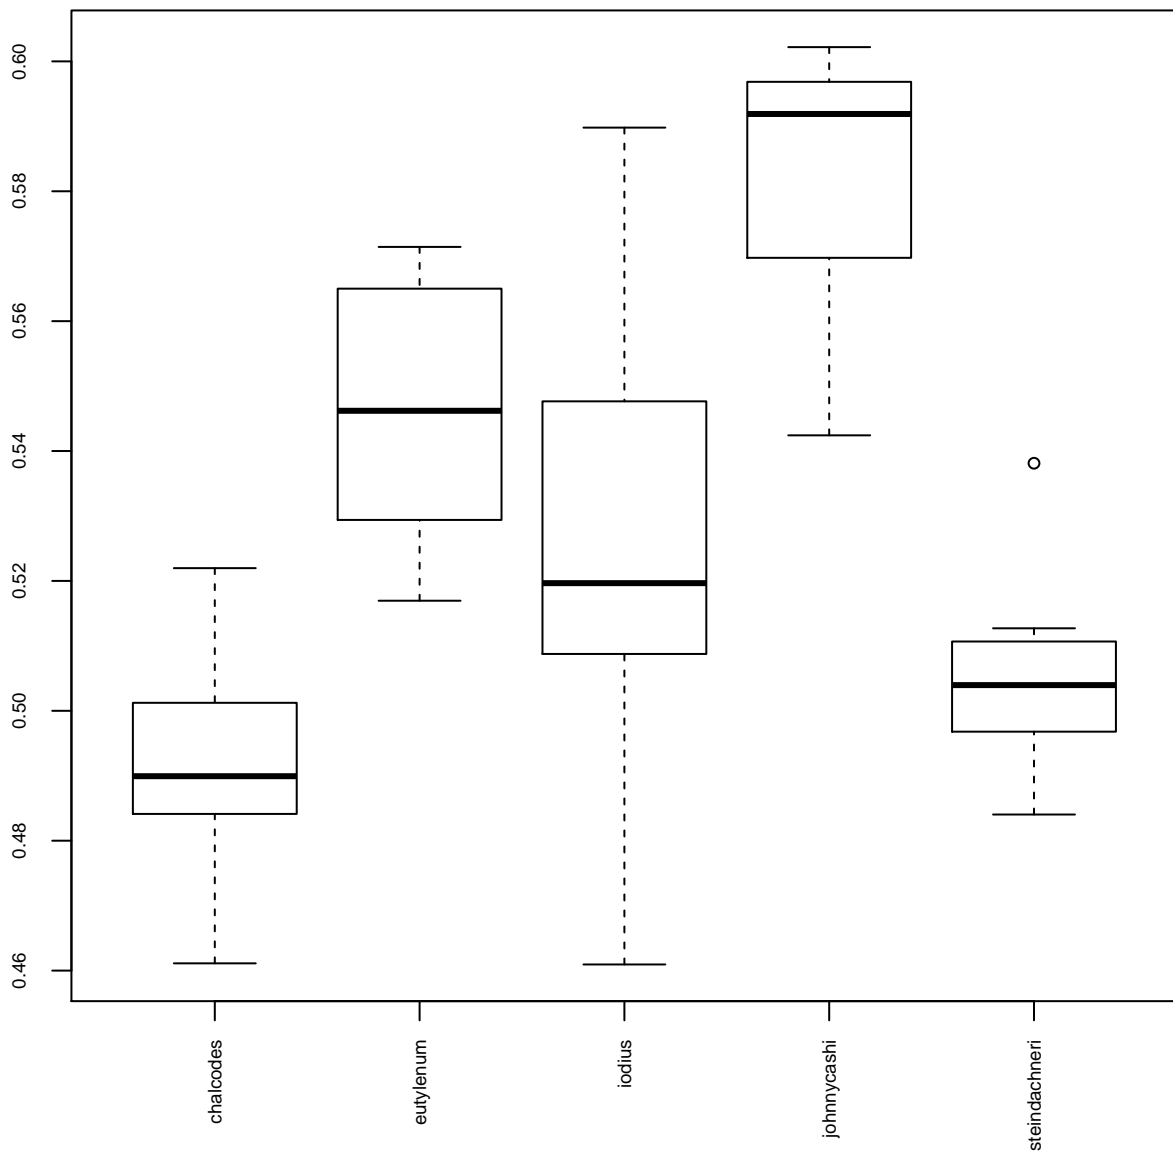

Supplement: Supplementary file 968

## Femur 4/Metatarsus 4 ratio – females

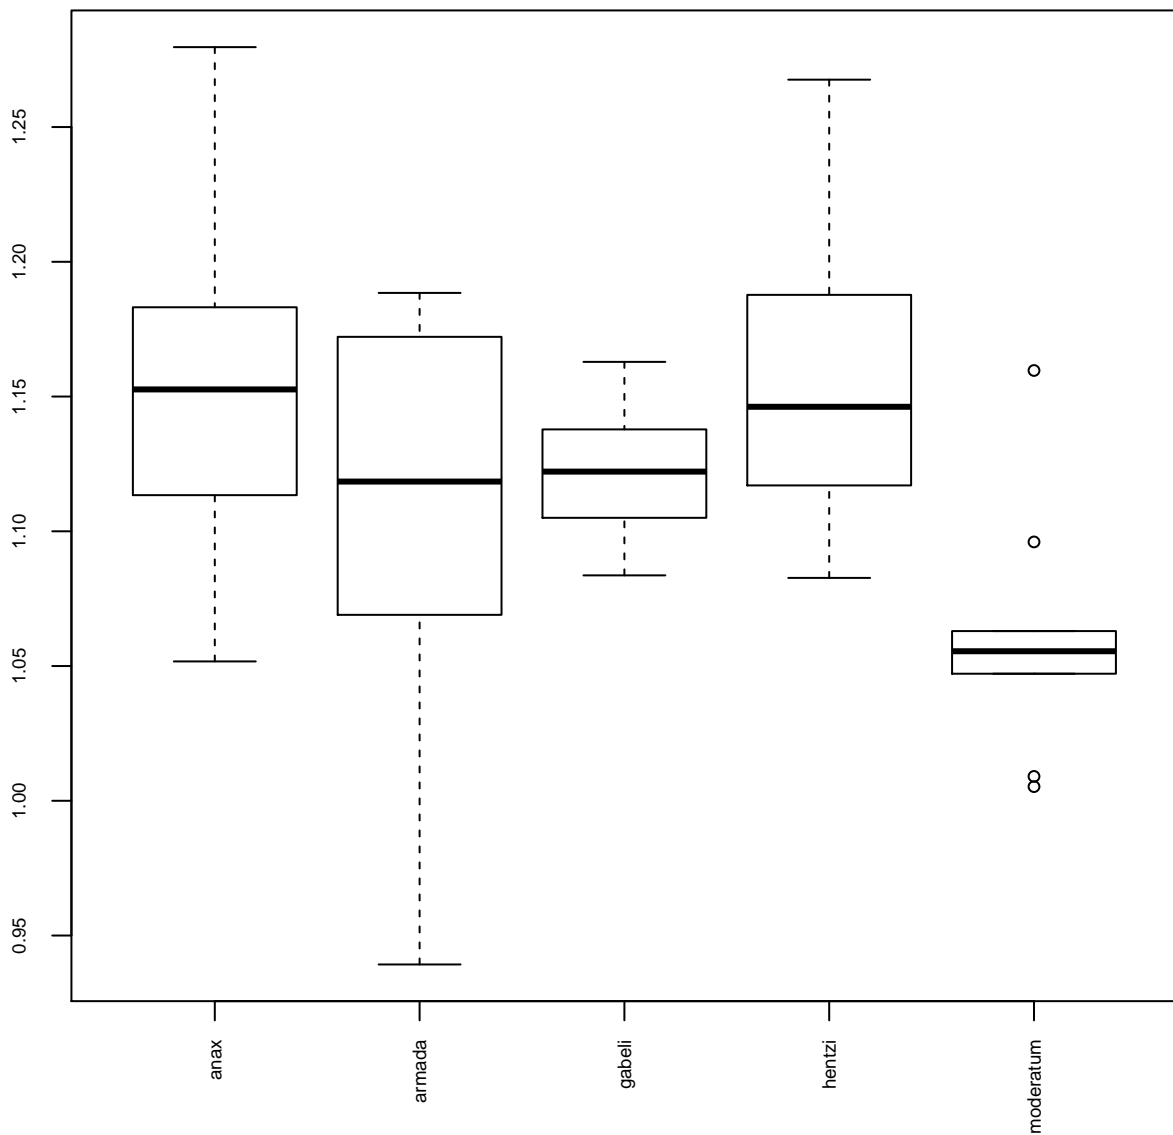

Supplement: Supplementary file 969

## Tarsus 1/Tarsus 3 ratio – females

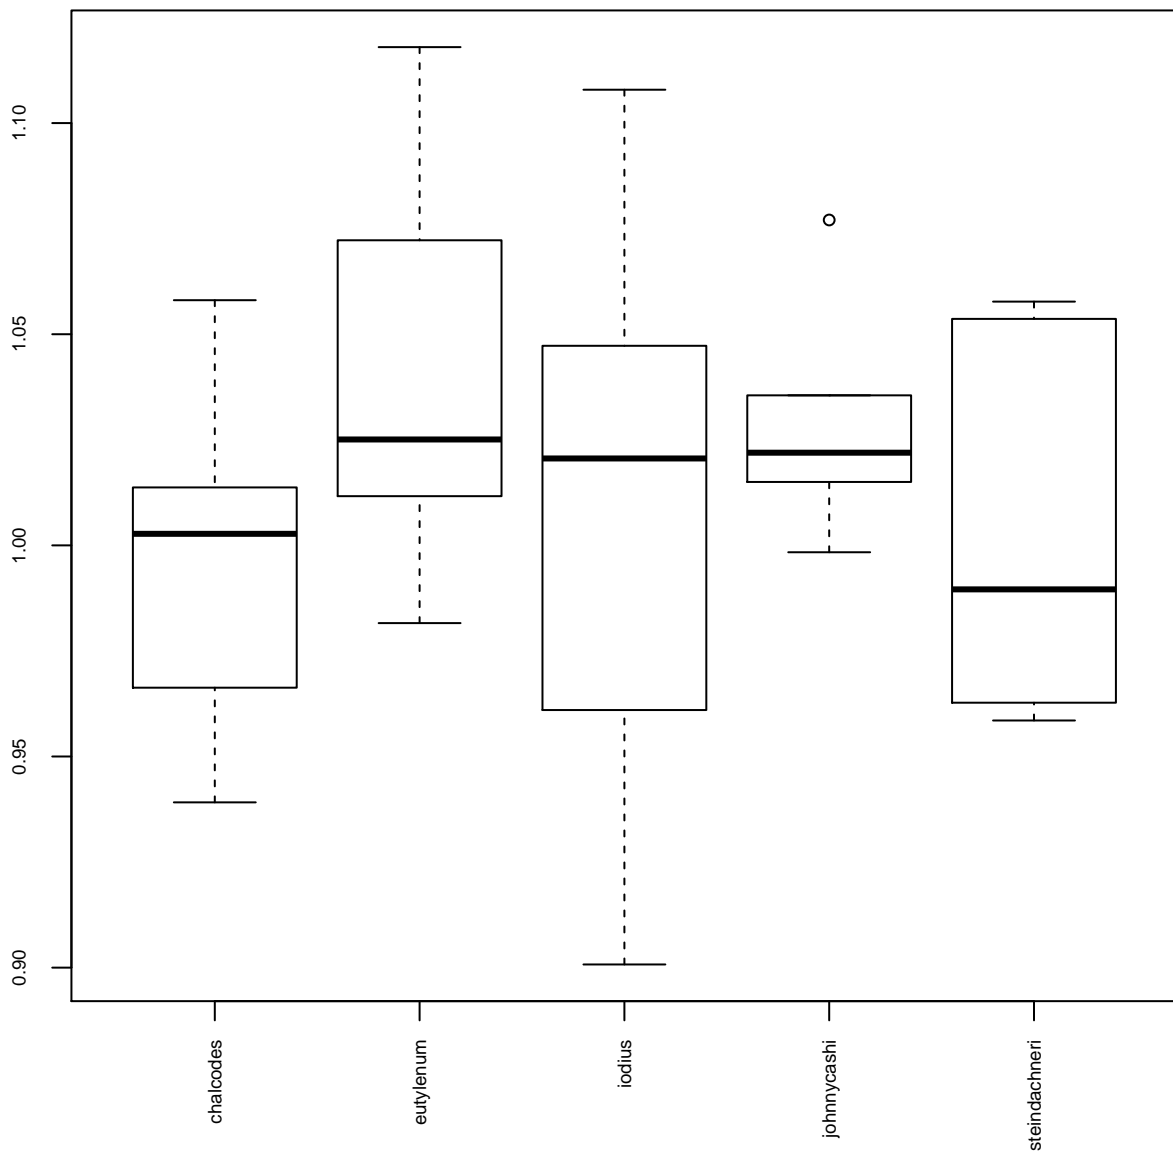

Supplement: Supplementary file 970

## Metatarsus 1/Patella 3 Length ratio – males

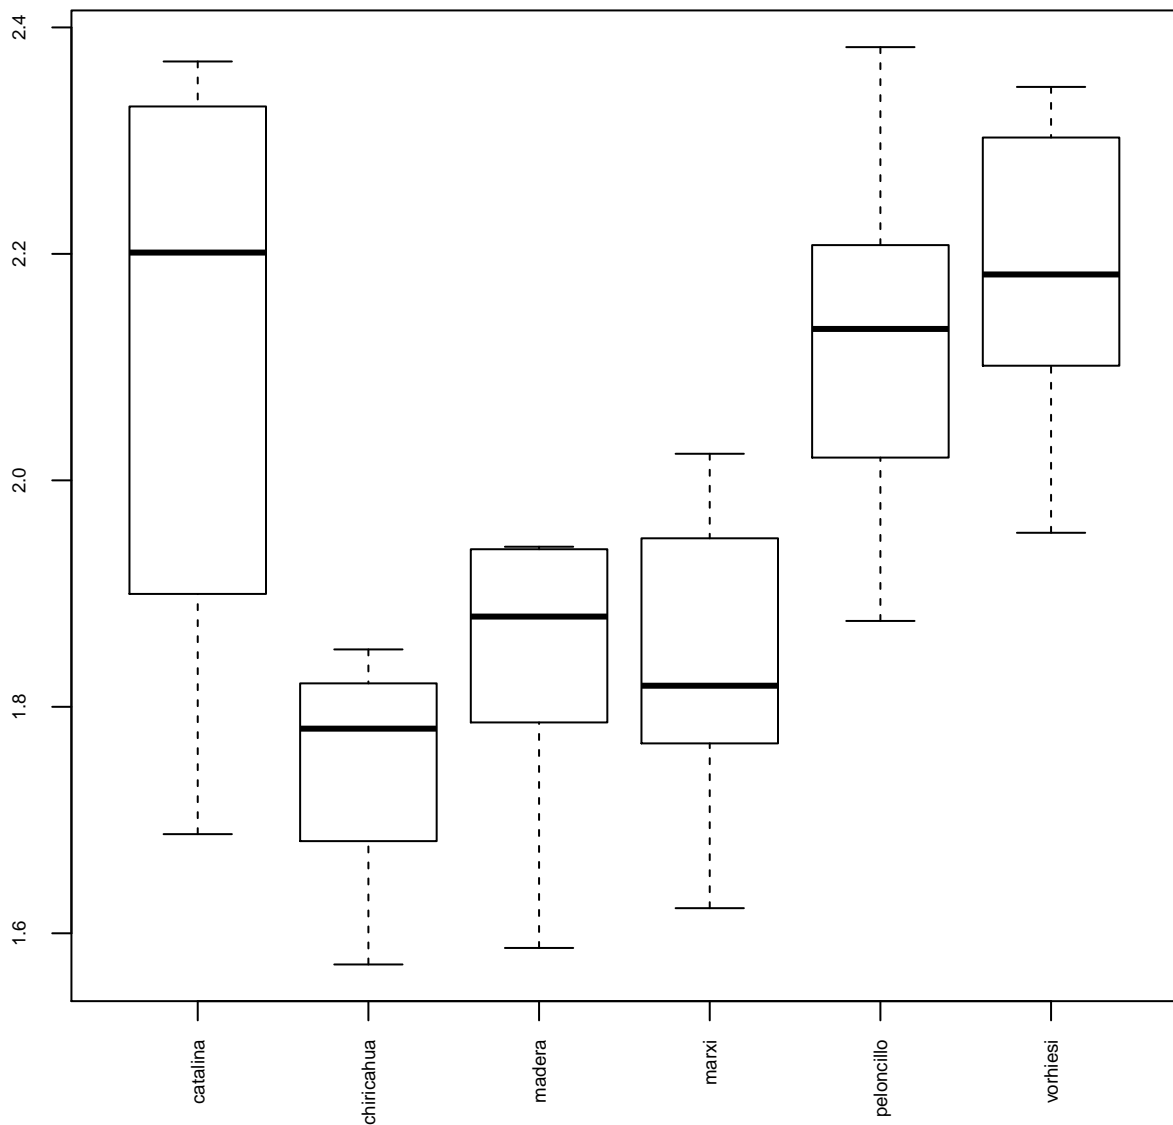

Supplement: Supplementary file 971

## Leg 4 Length – males

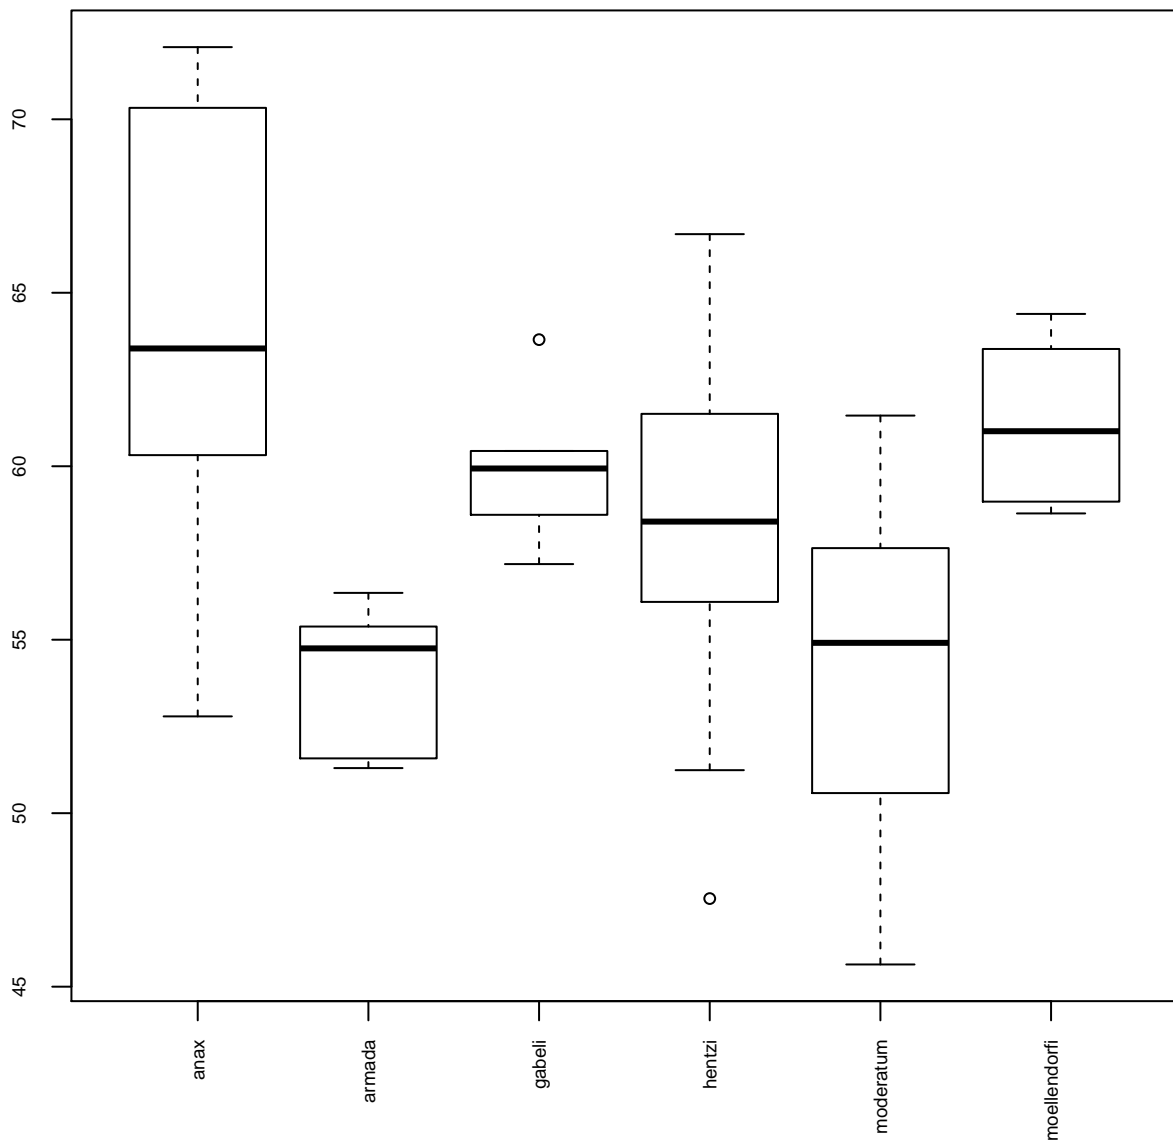

Supplement: Supplementary file 972

## Leg 4 Scopulation ratio – males

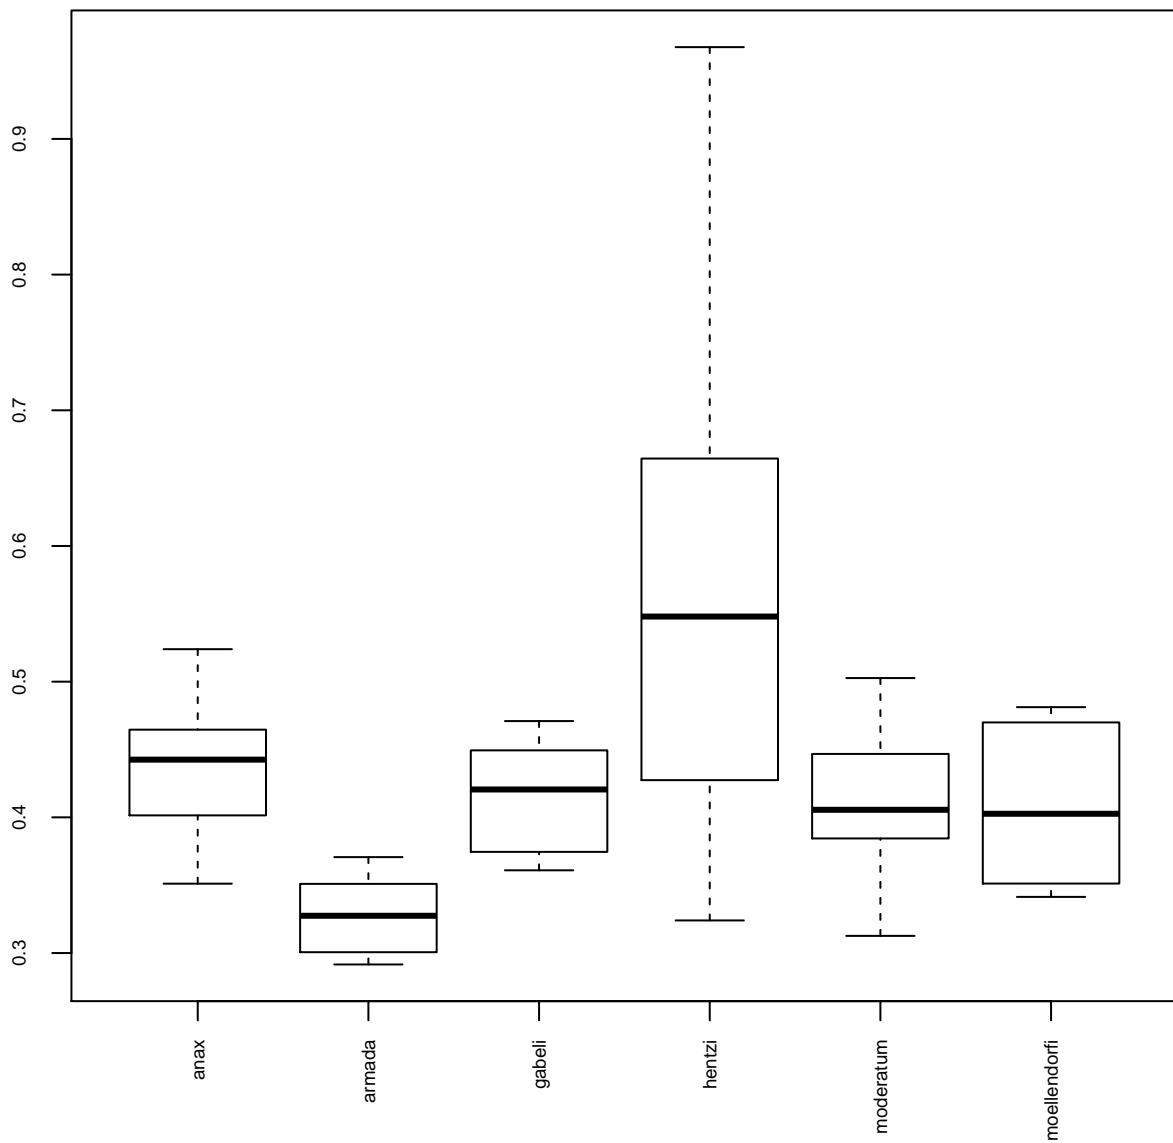

Supplement: Supplementary file 973

## Tarsus 1/Tibia 4 Length ratio – females

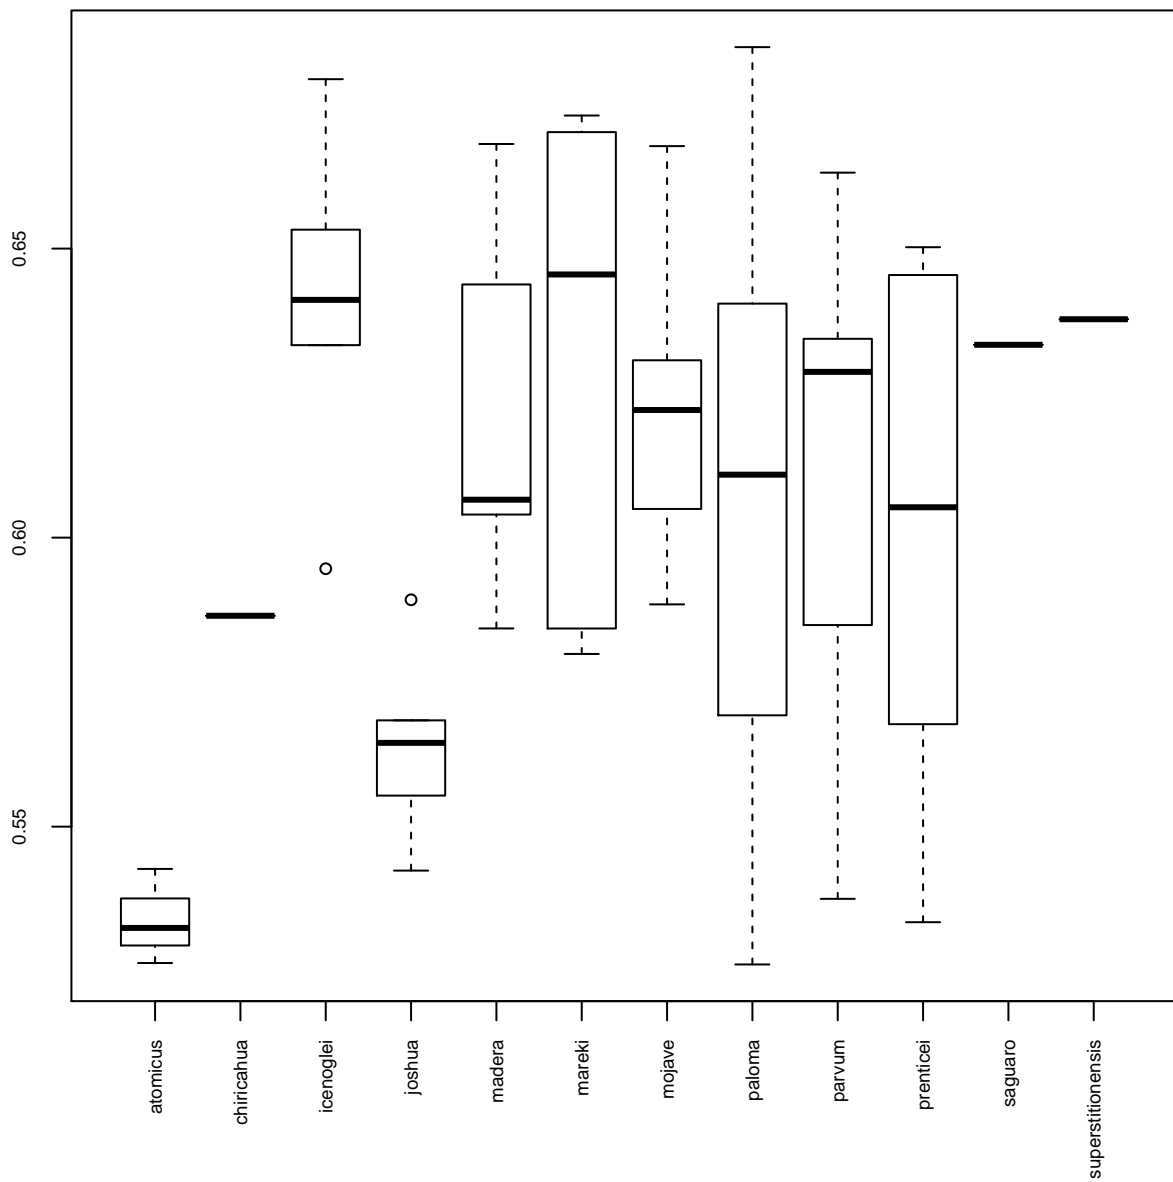

Supplement: Supplementary file 974

# Femur 3/Tibia 4 Length ratio – males

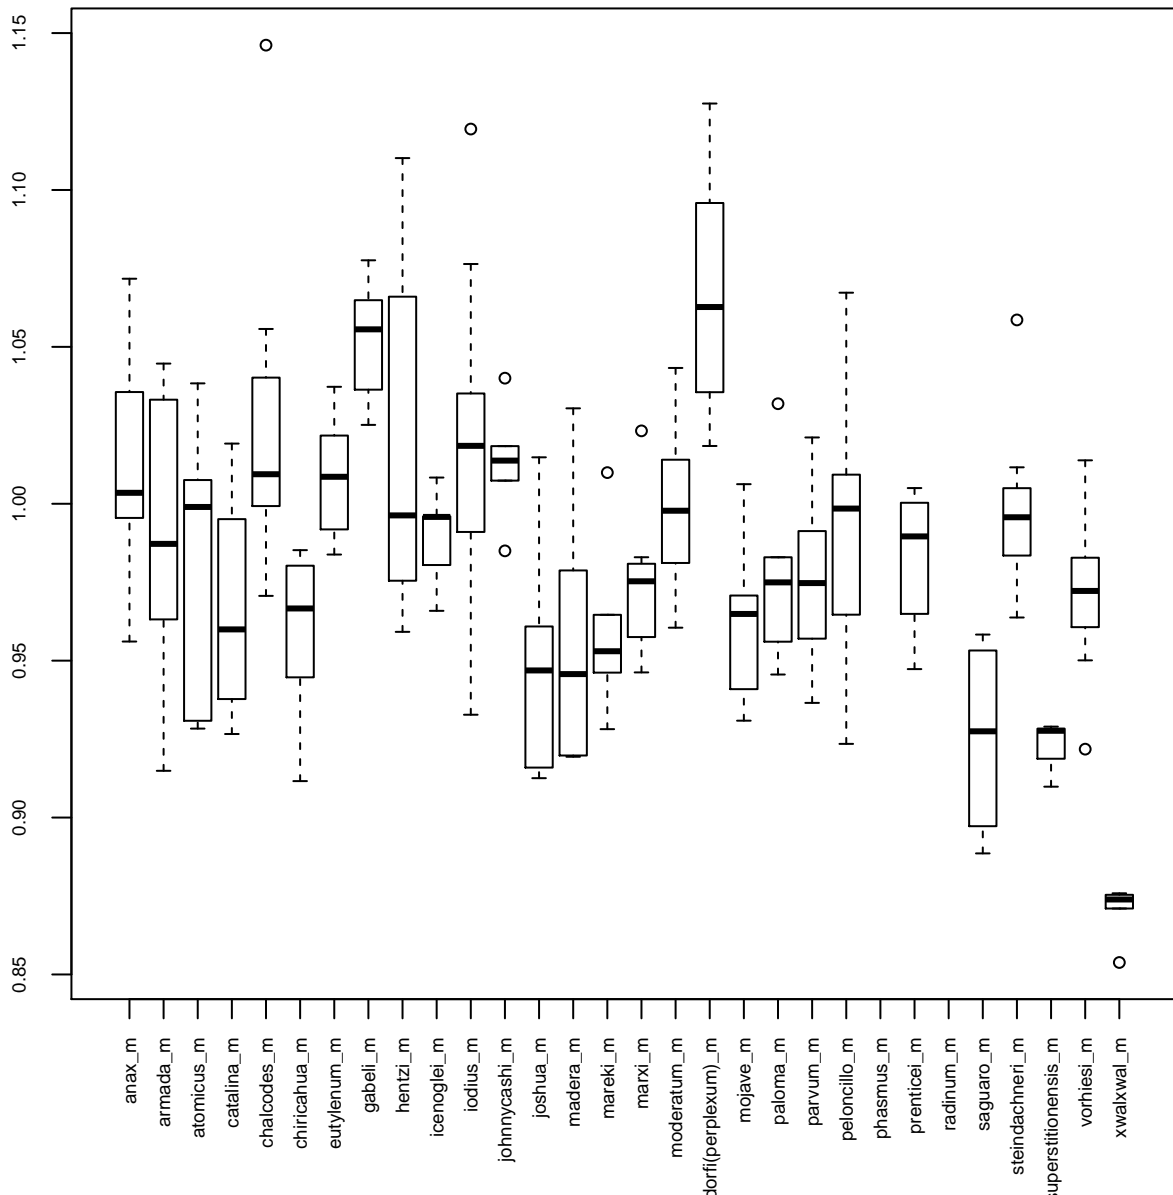

Supplement: Supplementary file 975

## Femur 1 Length/Width ratio – females

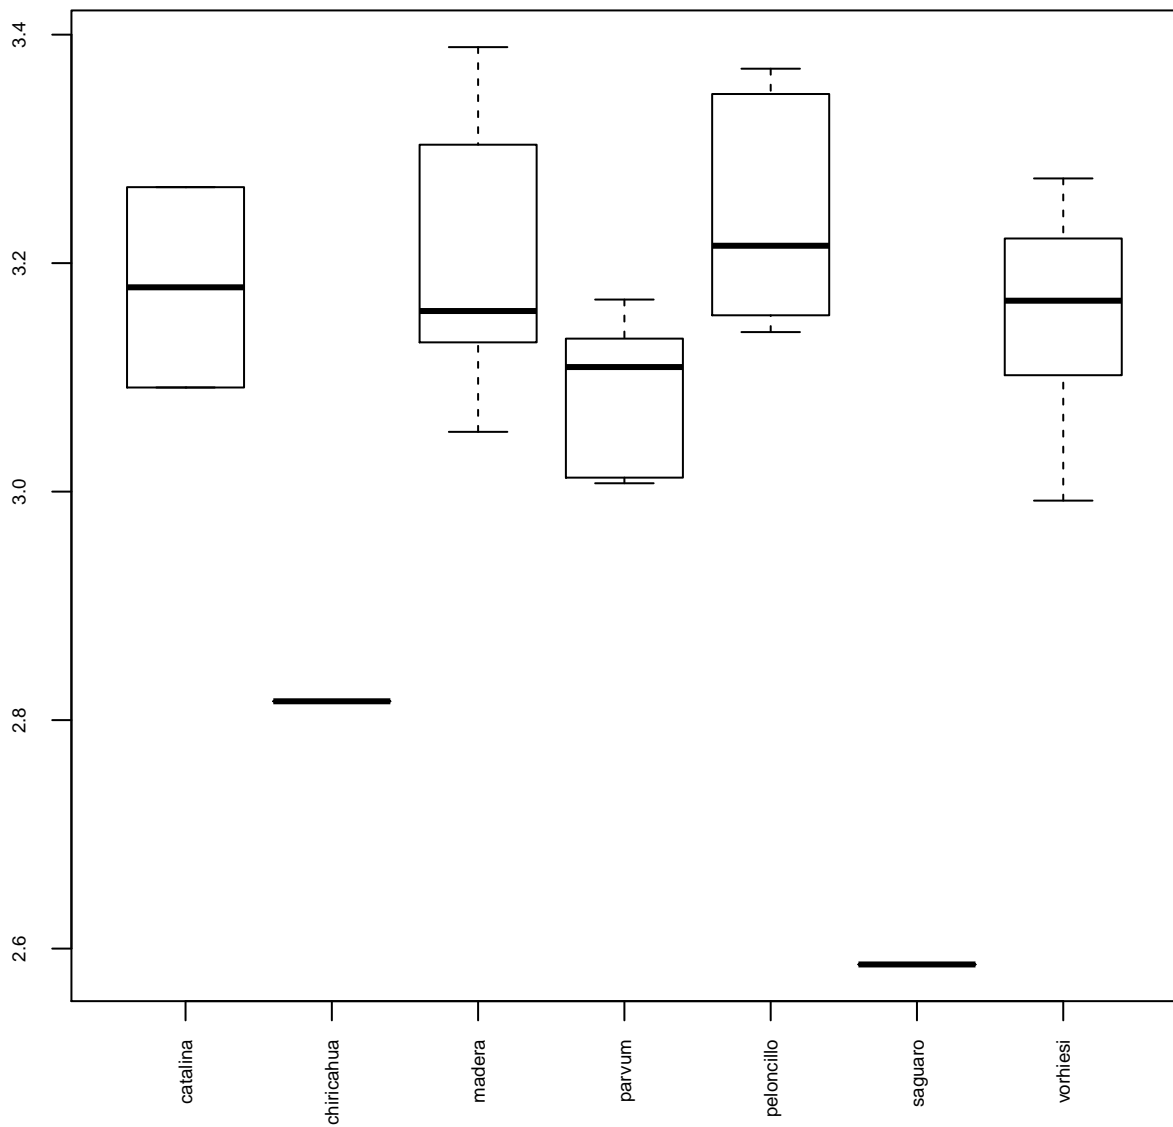

Supplement: Supplementary file 976

# Patella 4/Metatarsus 4 ratio – females

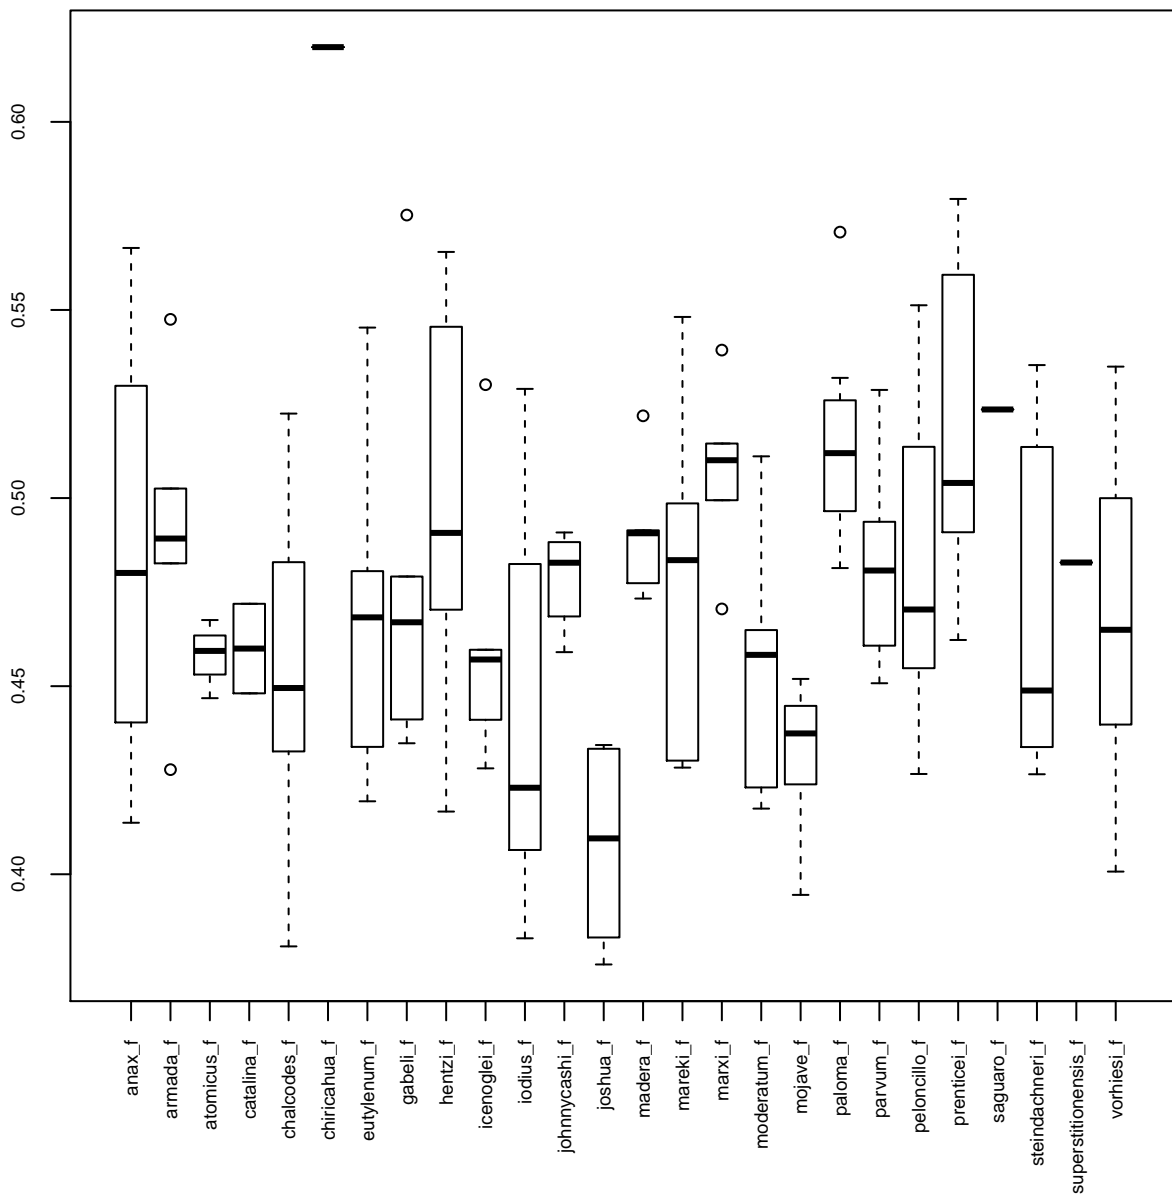

Supplement: Supplementary file 977

# Patella 1/Patella 4 ratio – males

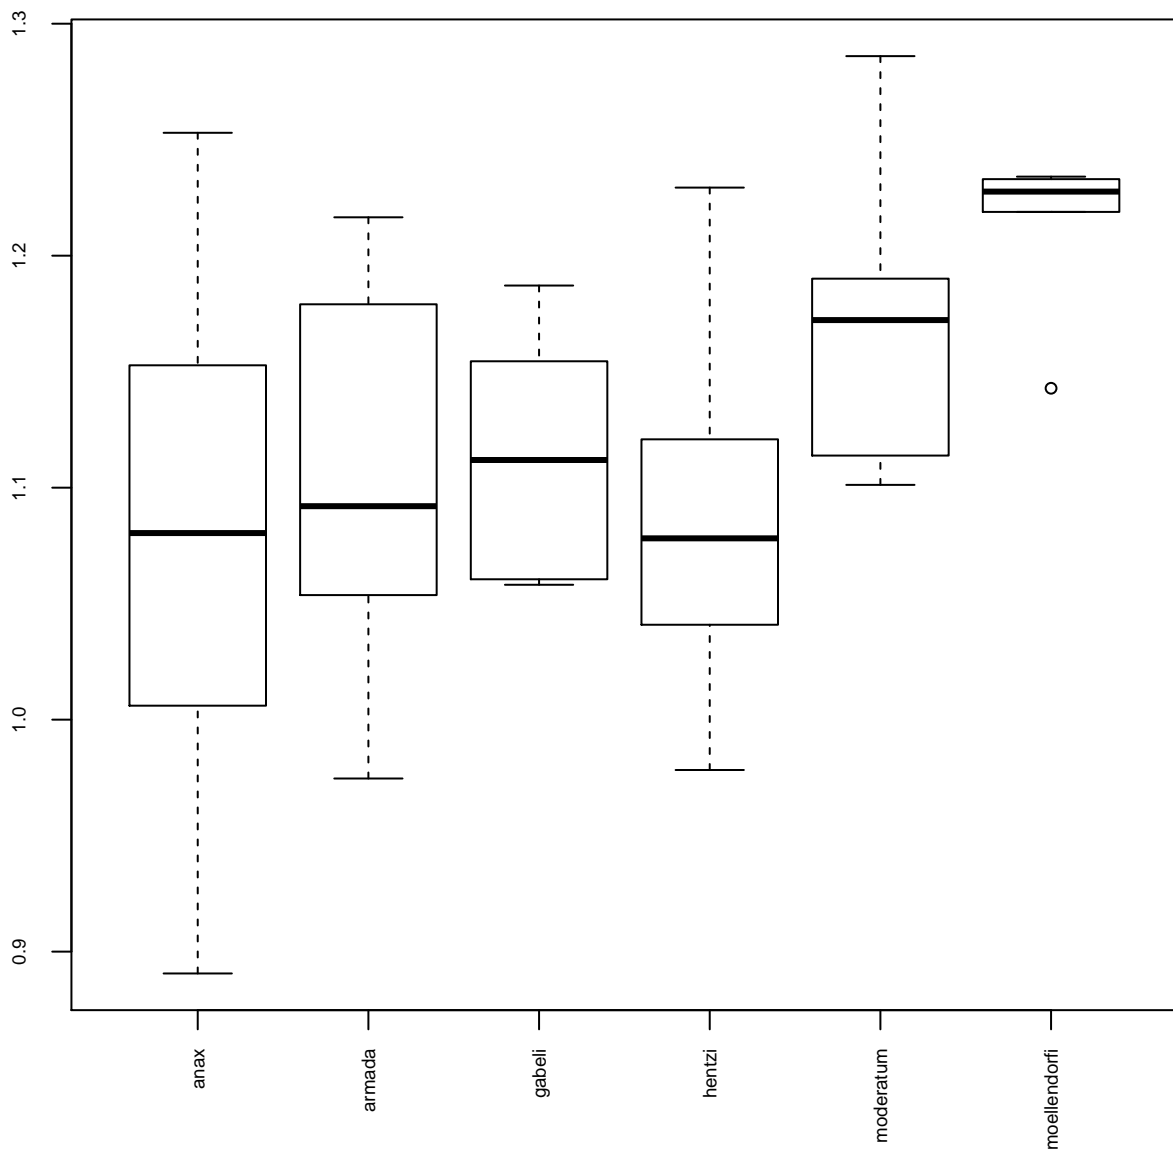

Supplement: Supplementary file 978

## Femur 1/Tarsus 1 ratio – females

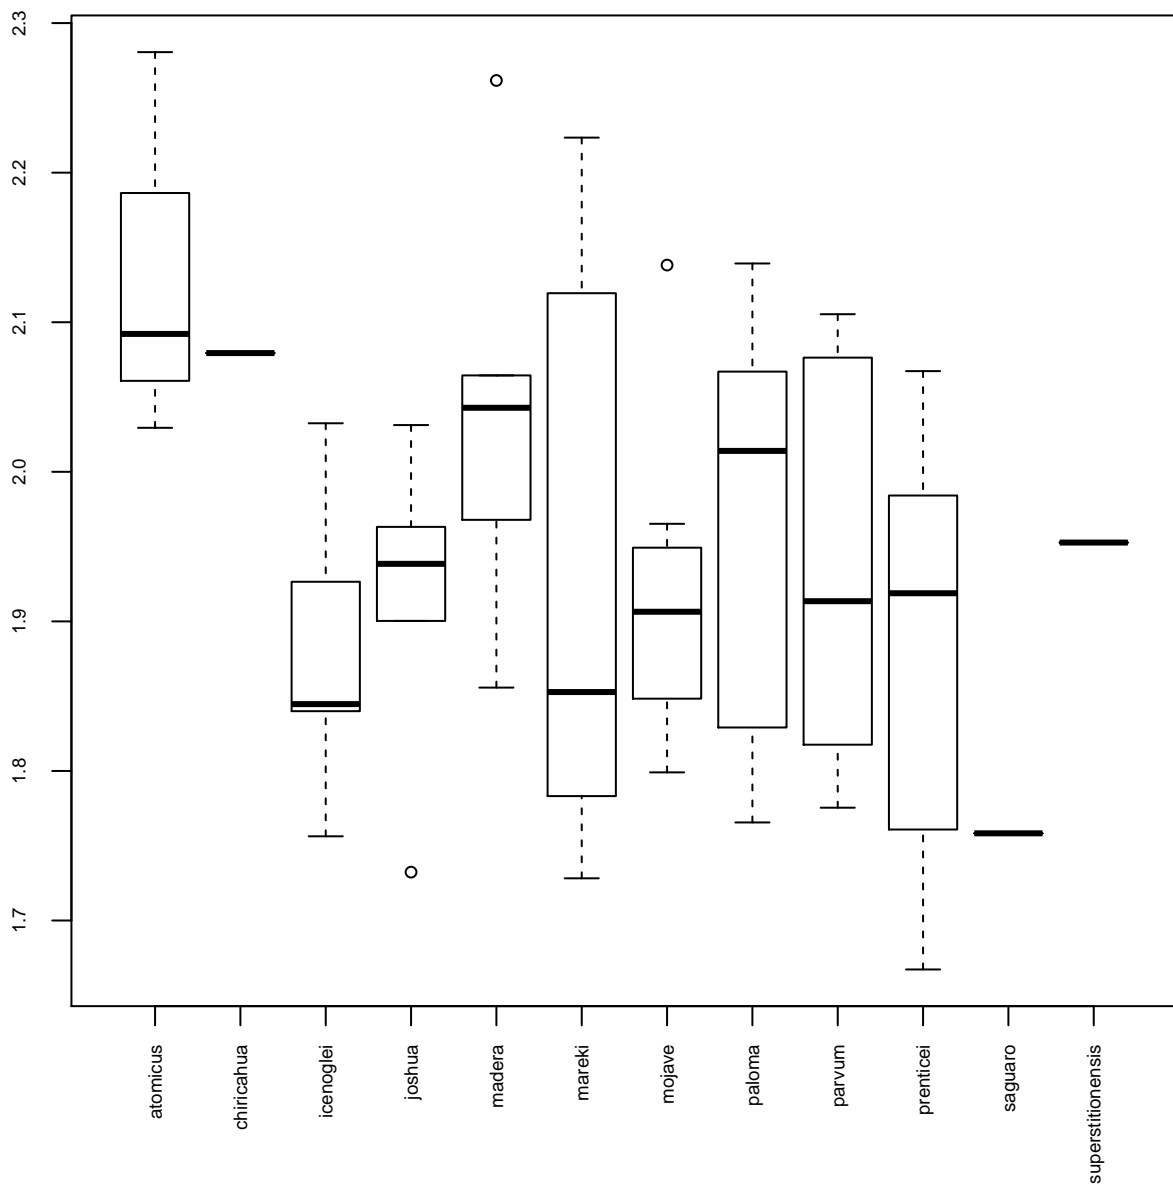

Supplement: Supplementary file 979

# Carapace Width – males

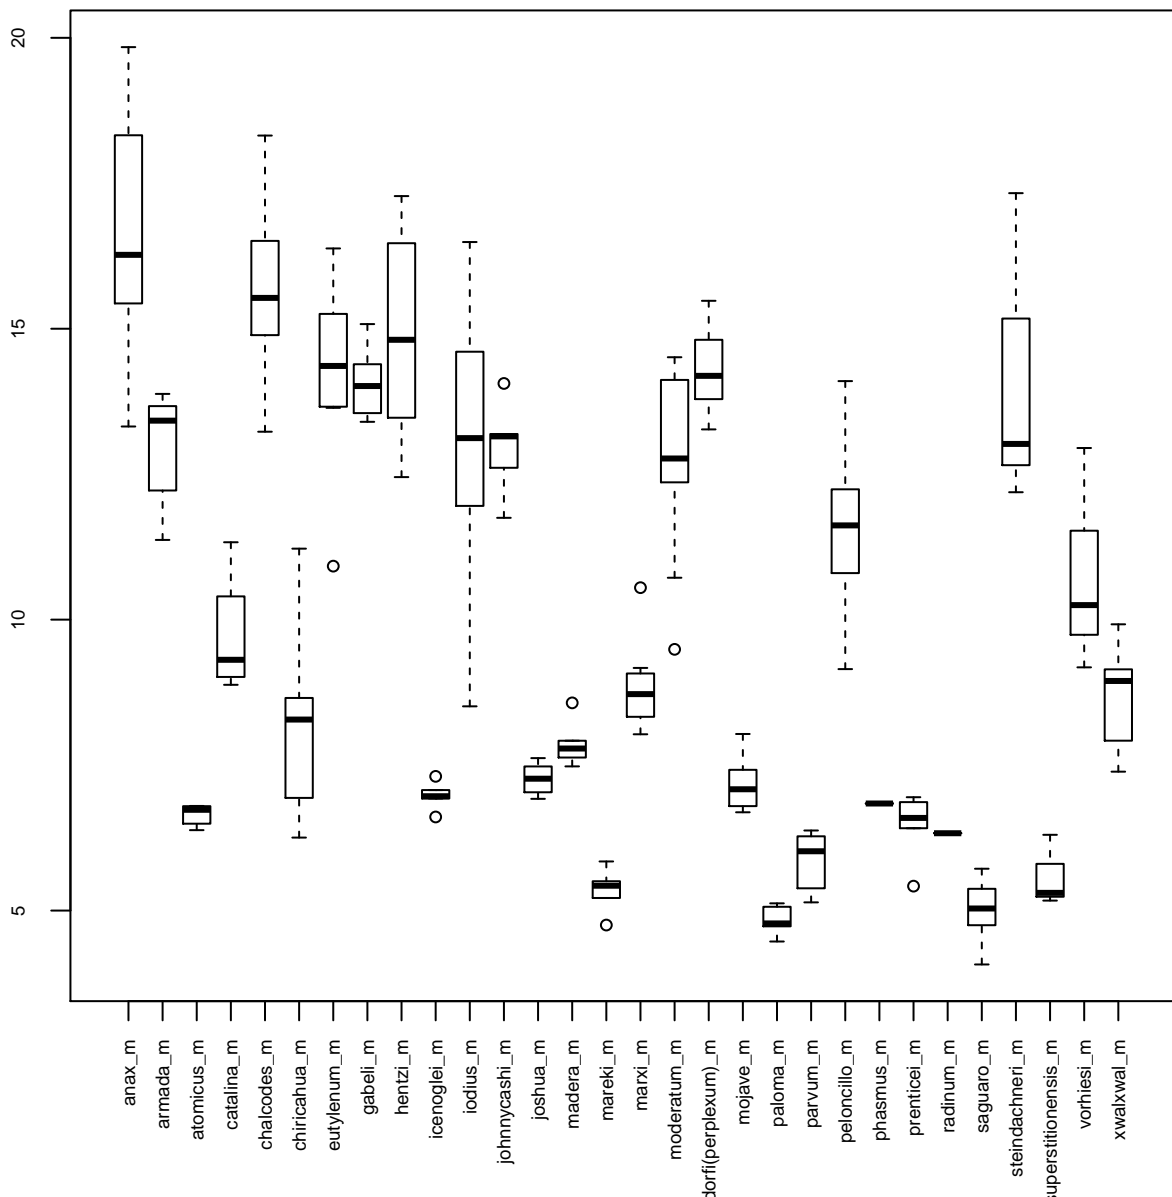

Supplement: Supplementary file 980

# Patella 3/Metatarsus 4 Length ratio – females

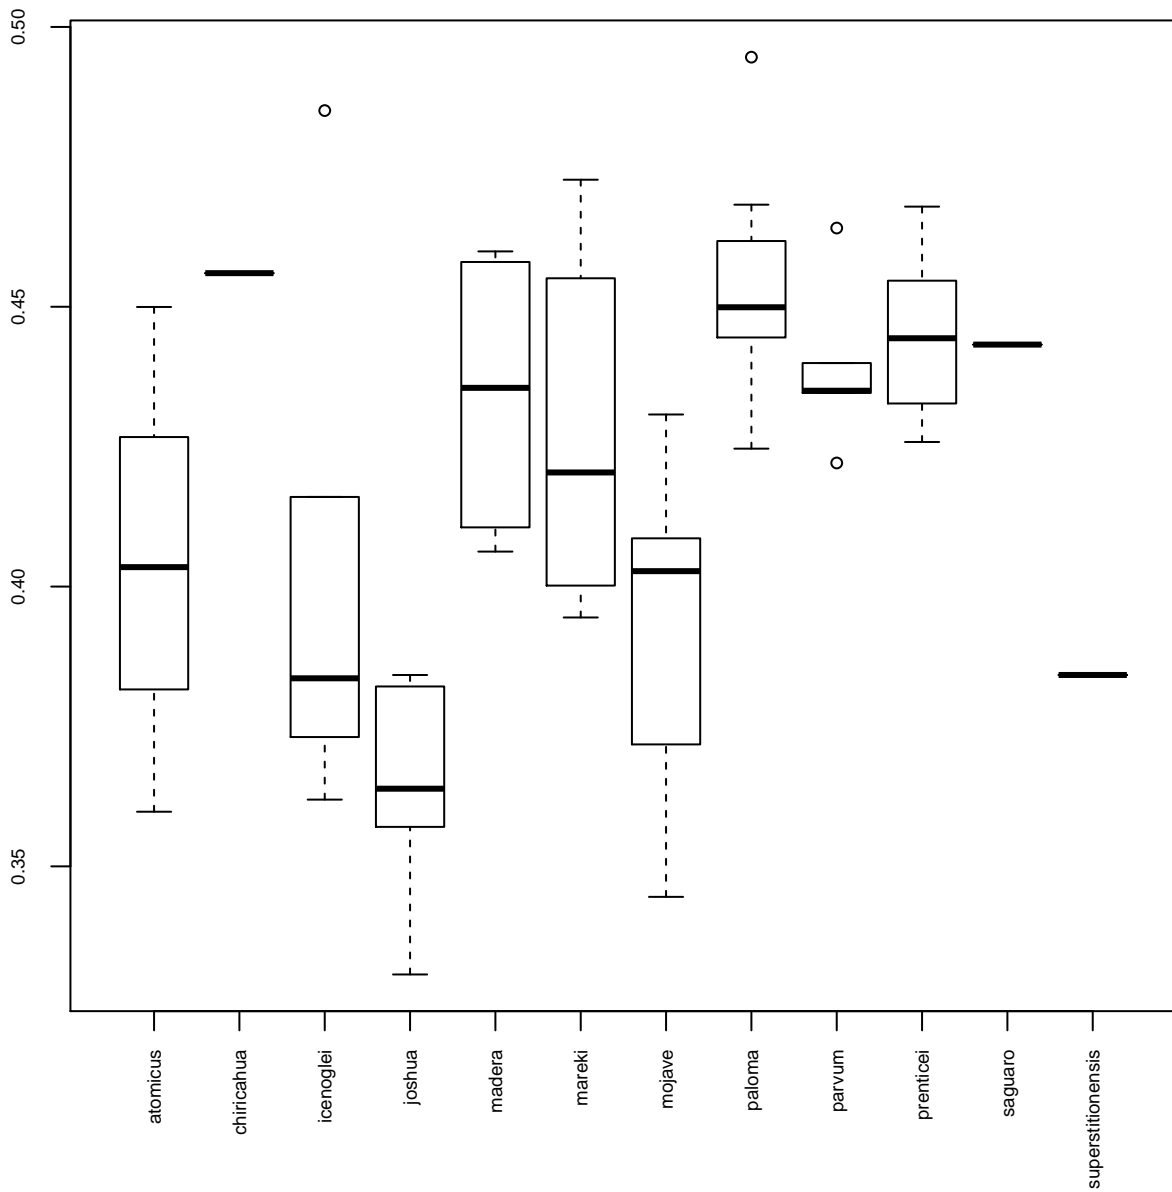

Supplement: Supplementary file 981

**Femur 1/Patella 3 ratio – males**

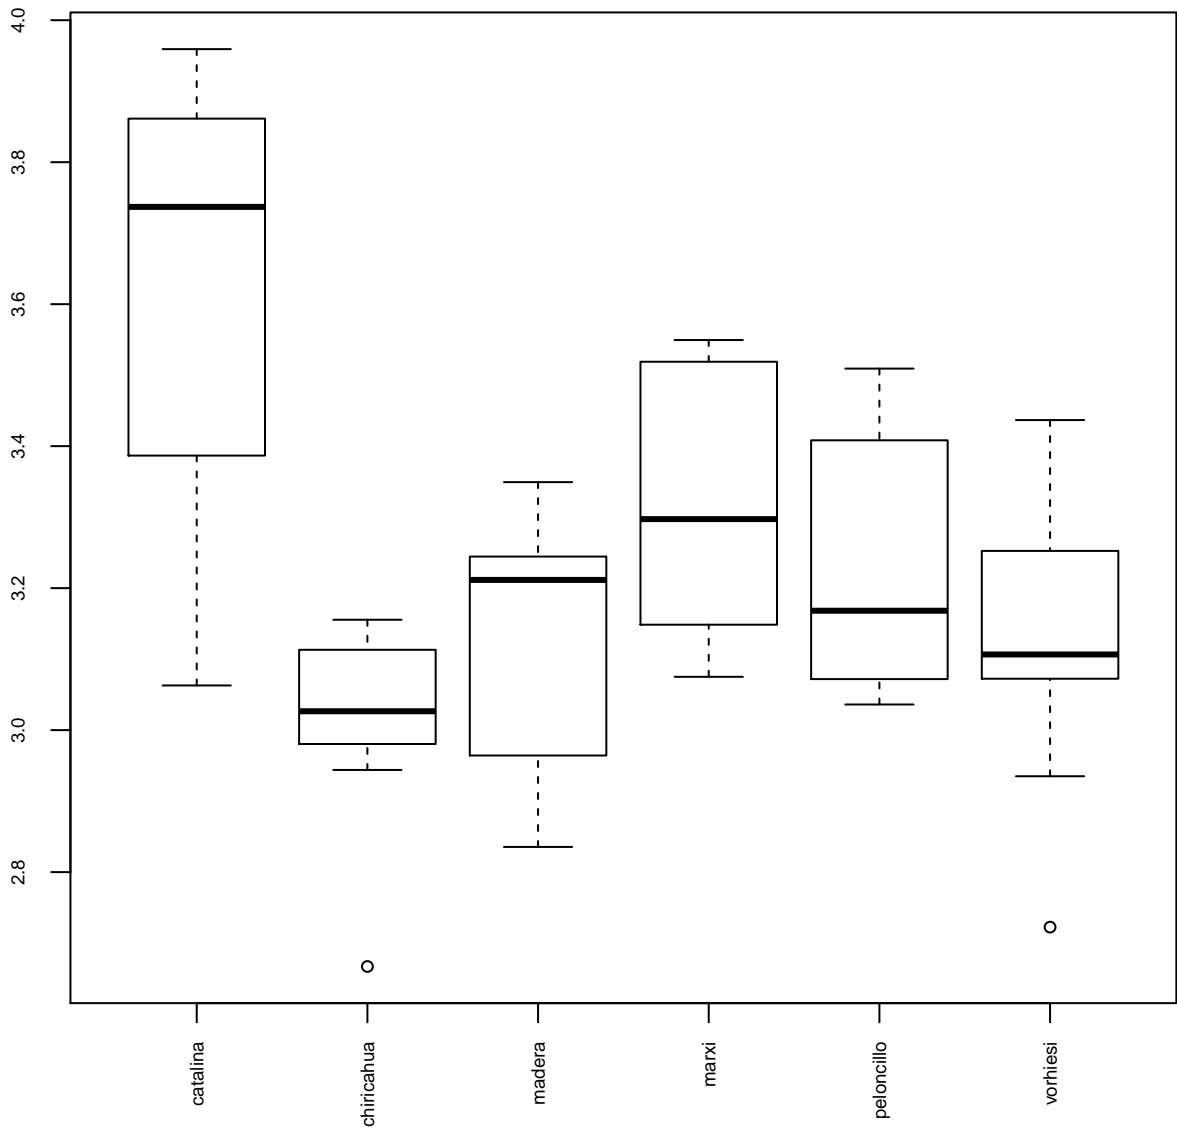

Supplement: Supplementary file 982

# Patella 3/Metatarsus 3 ratio – females

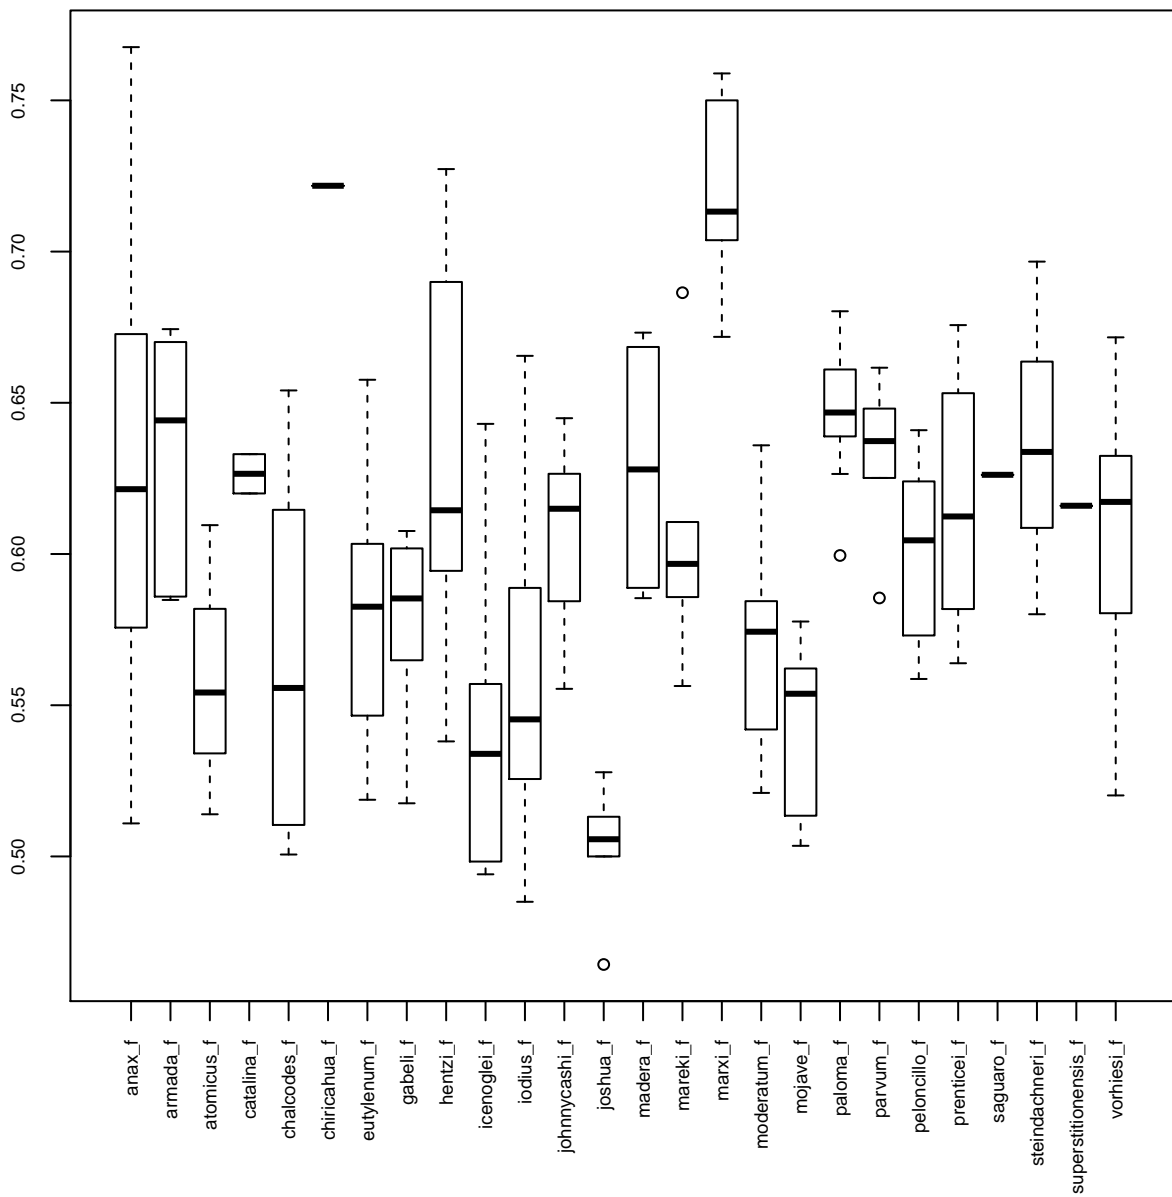

Supplement: Supplementary file 983

## Tibia 3/Femur 4 Length ratio – males

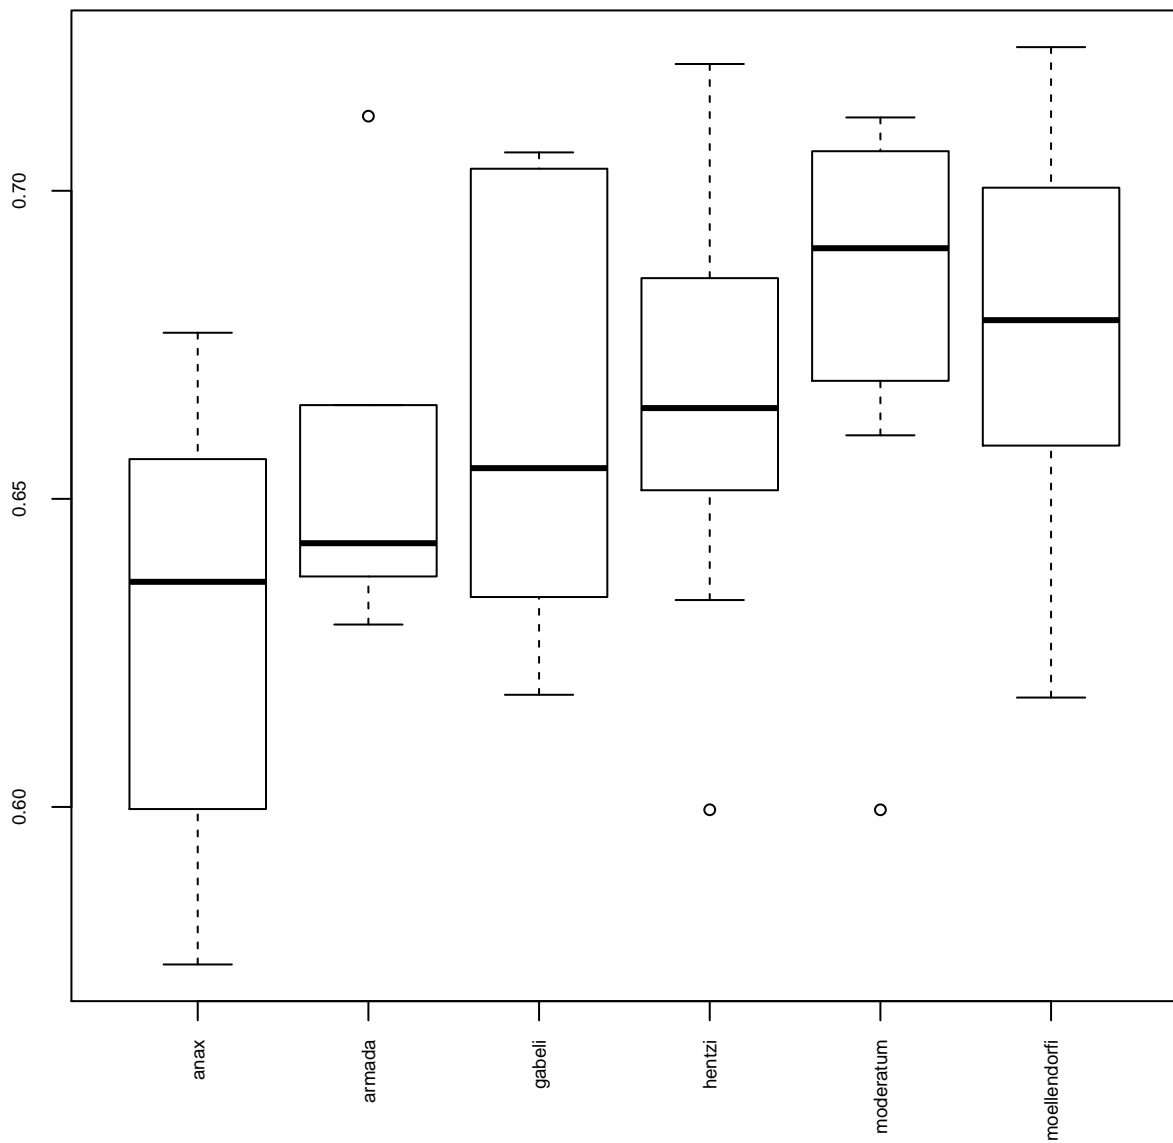

Supplement: Supplementary file 984

## Carapace Length/Patella 1 ratio – males

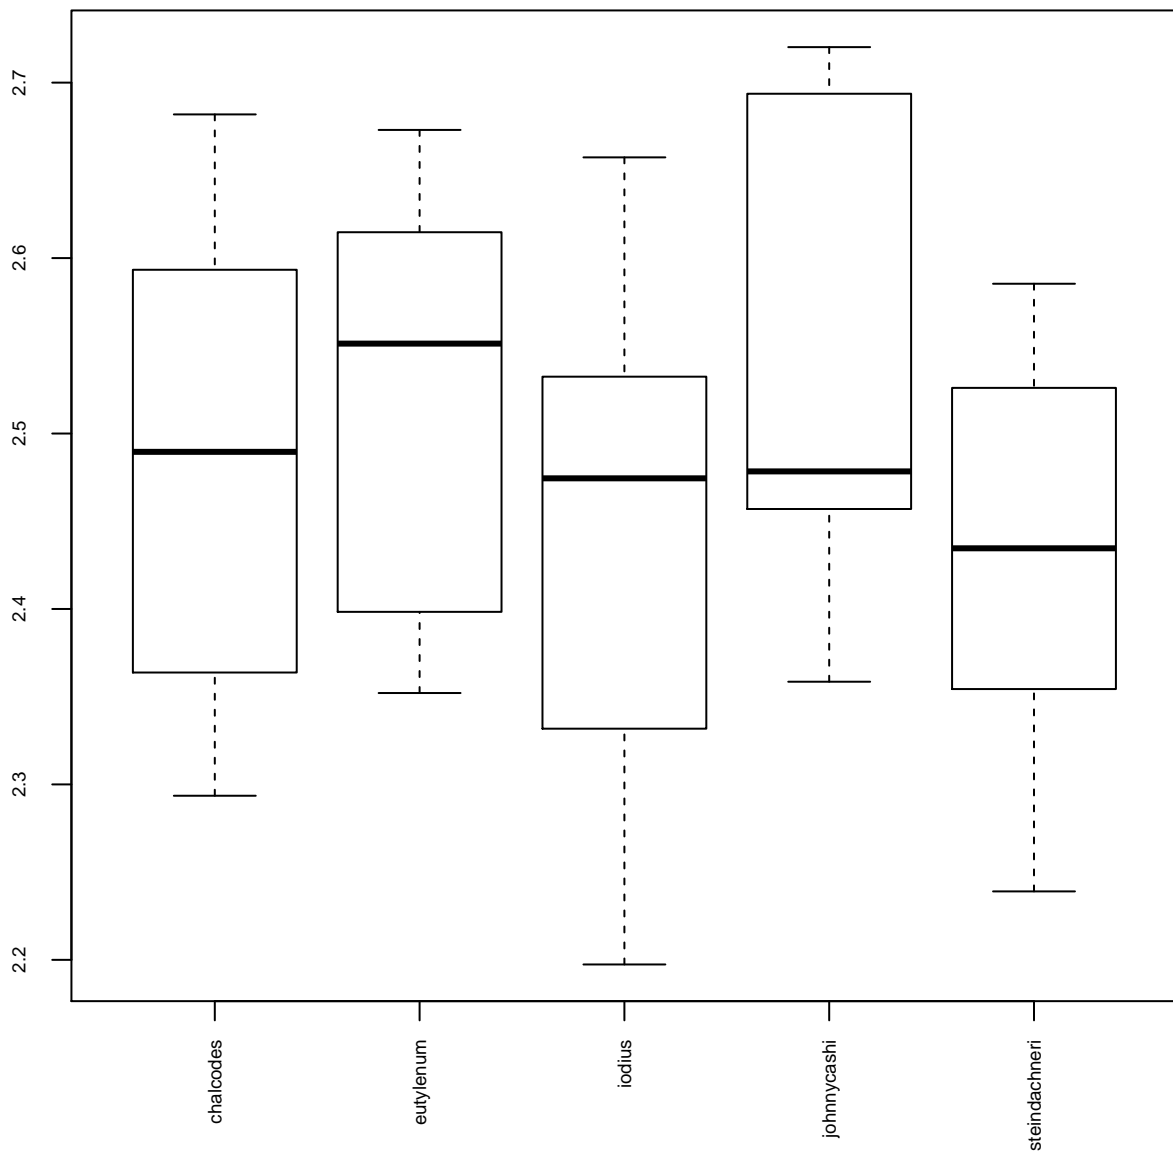

Supplement: Supplementary file 985

## Metatarsus 1/Patella 3 Length ratio – females

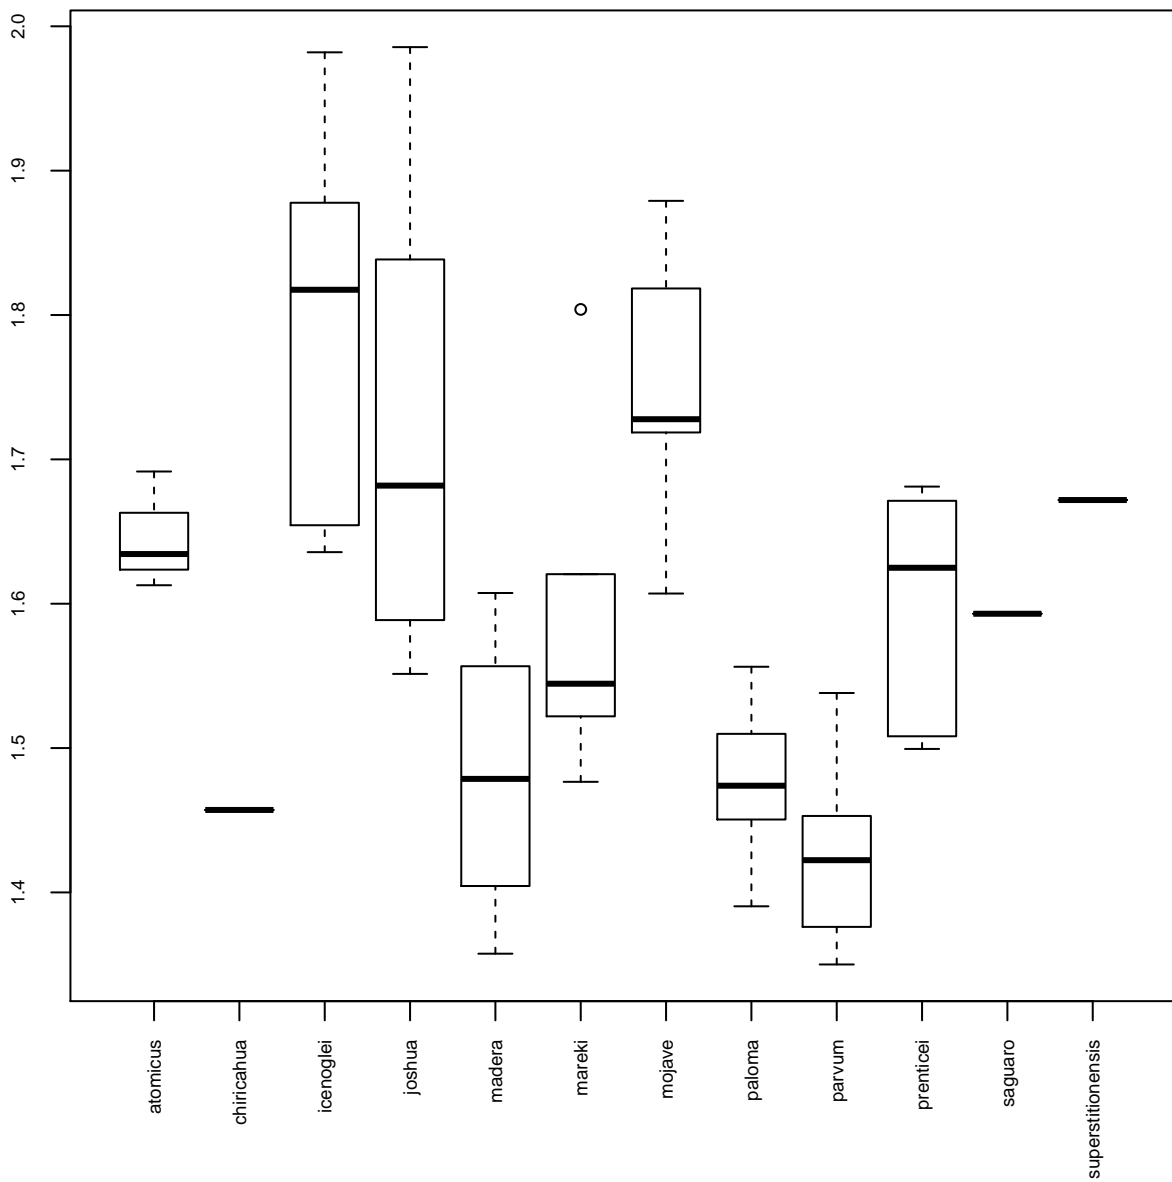

Supplement: Supplementary file 986

## Tibia 1/Metatarsus 1 ratio – females

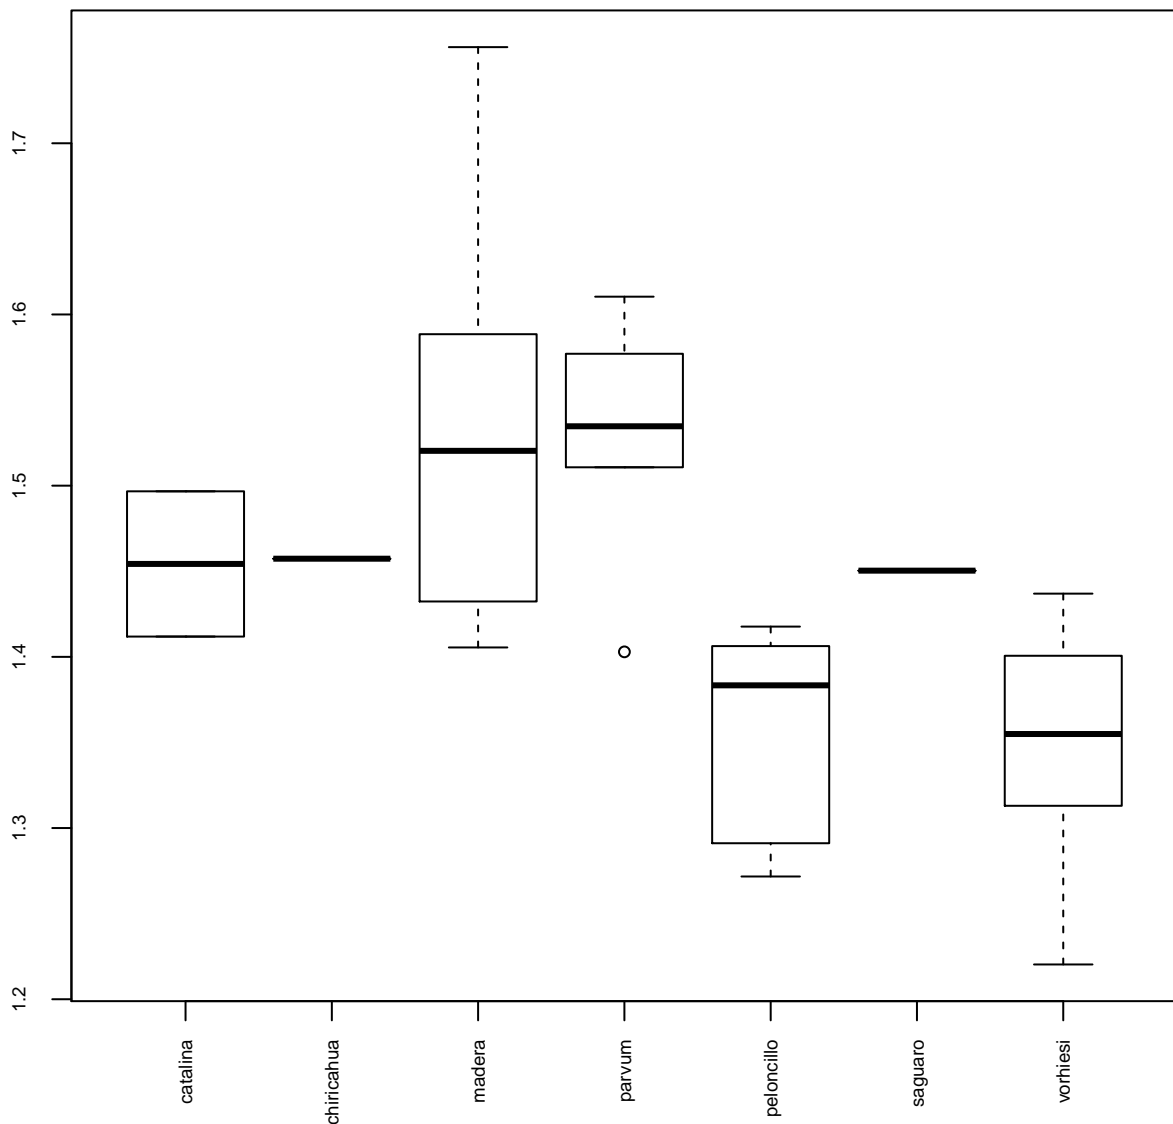

Supplement: Supplementary file 987

## Palpal Tibia Length/Width ratio – males

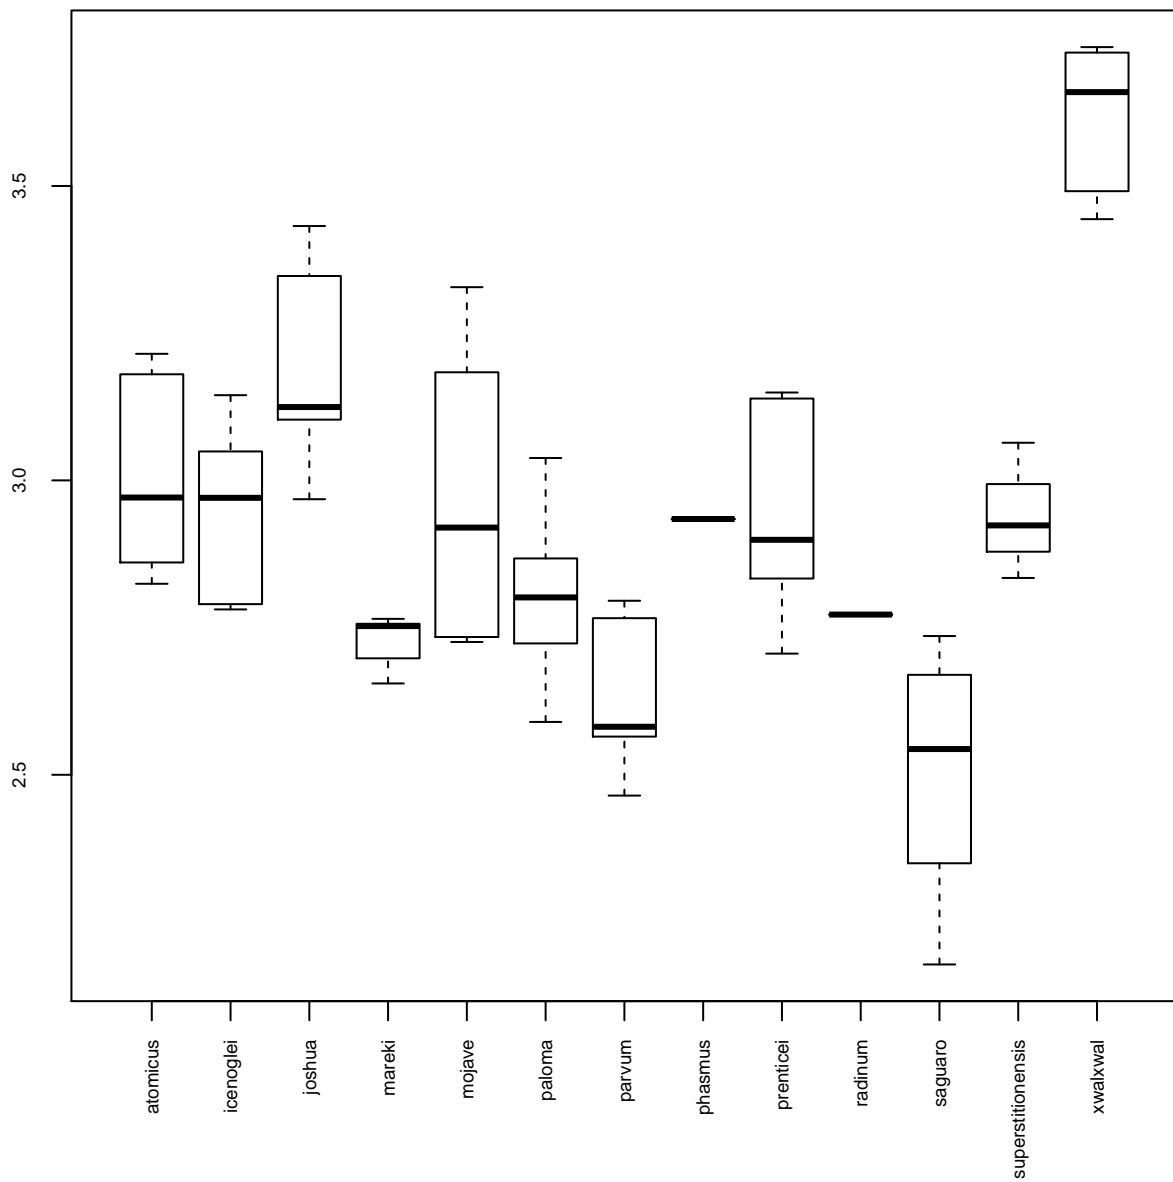

Supplement: Supplementary file 988

## Femur 1/Patella 1 ratio – males

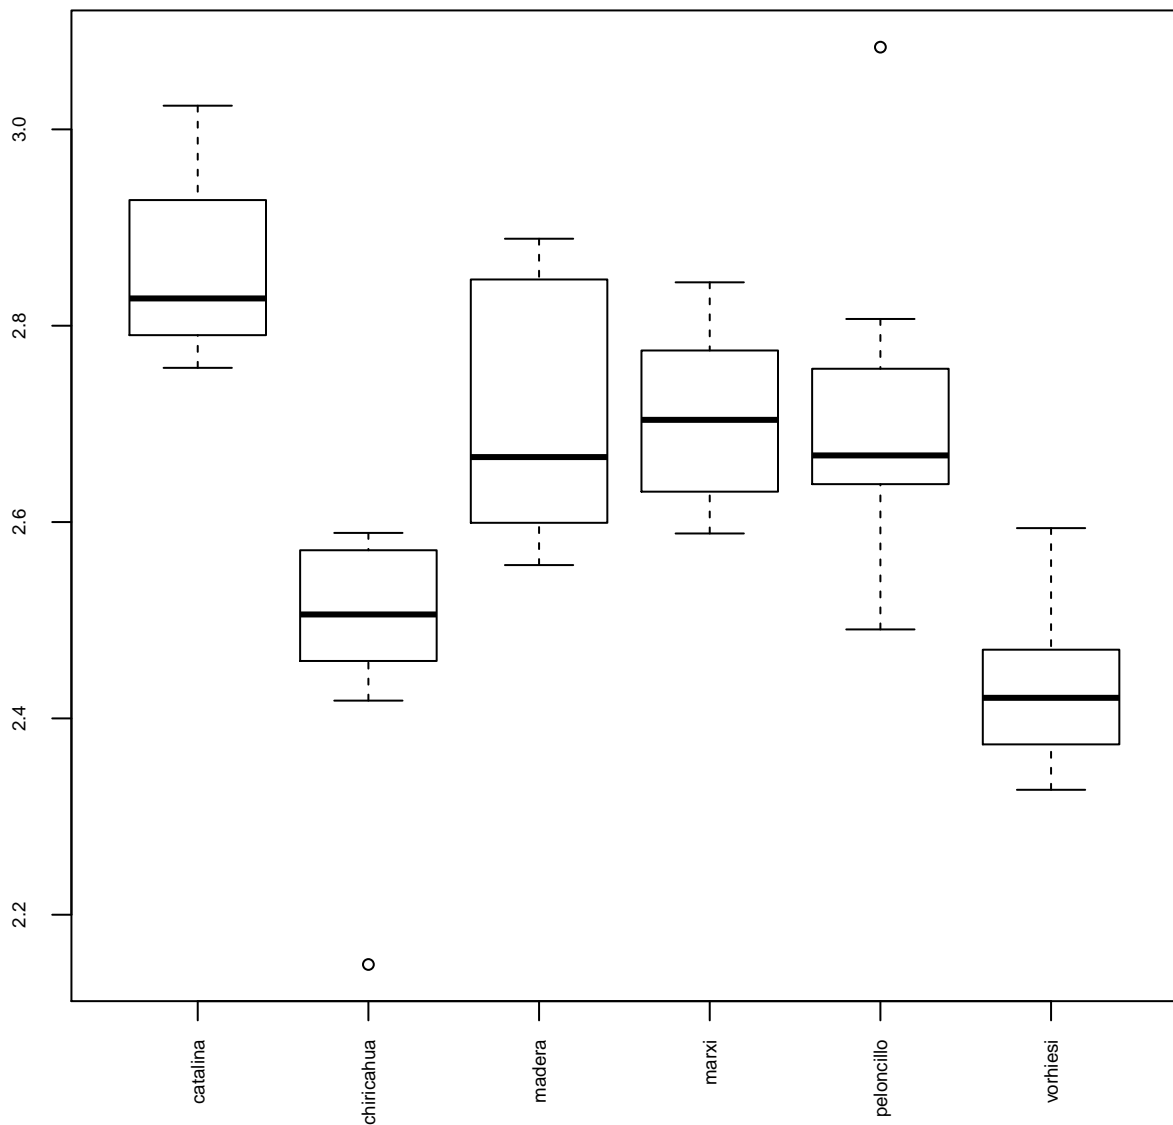

Supplement: Supplementary file 989

## Tibia 1/Tarsus 1 ratio – females

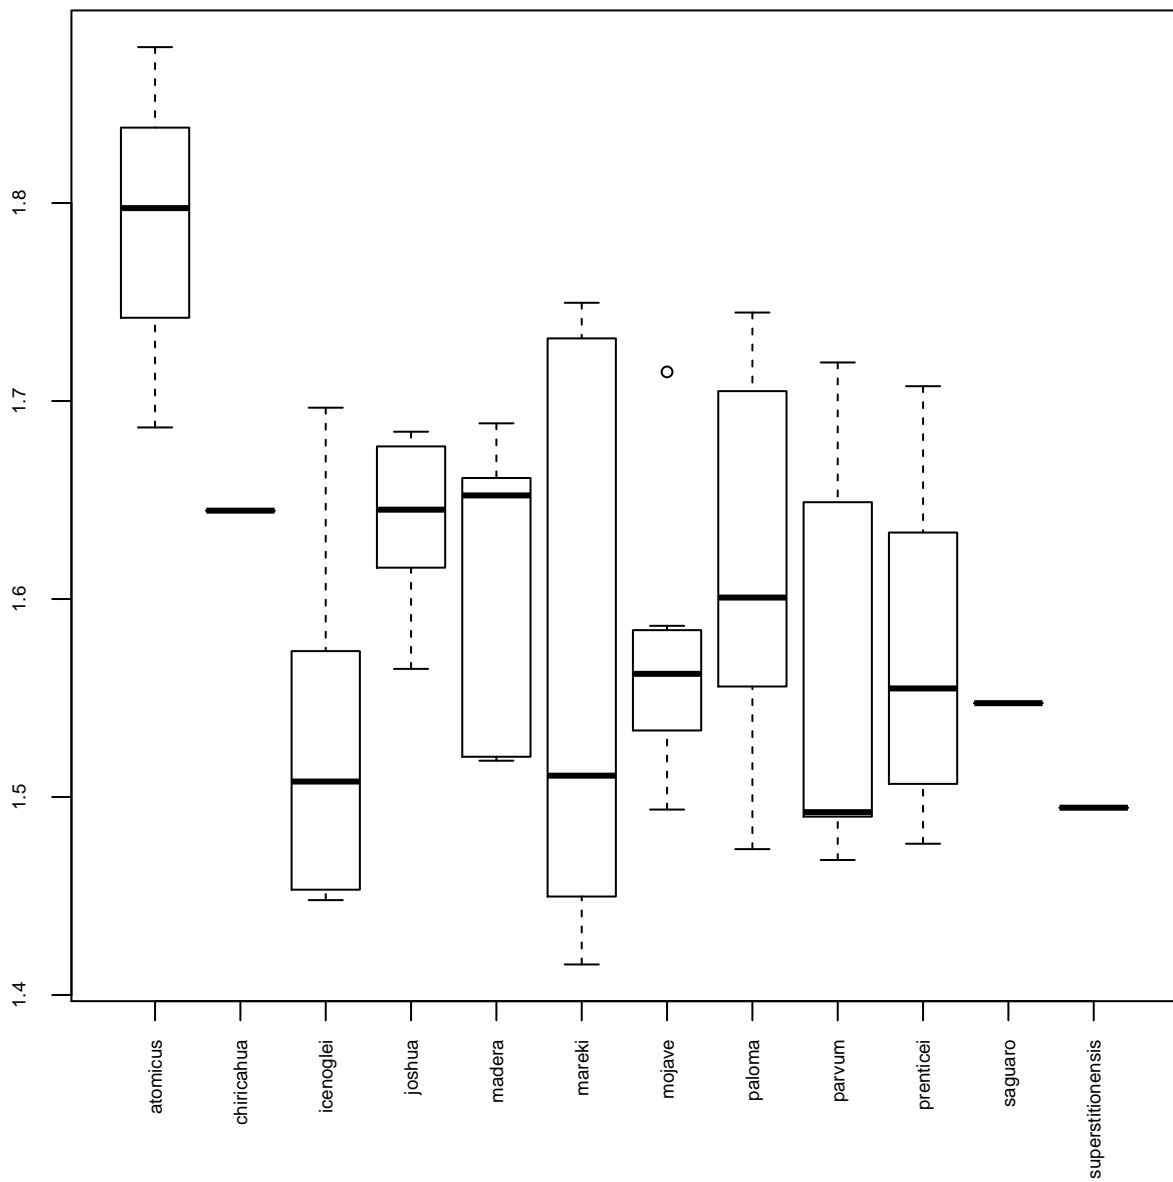

Supplement: Supplementary file 990

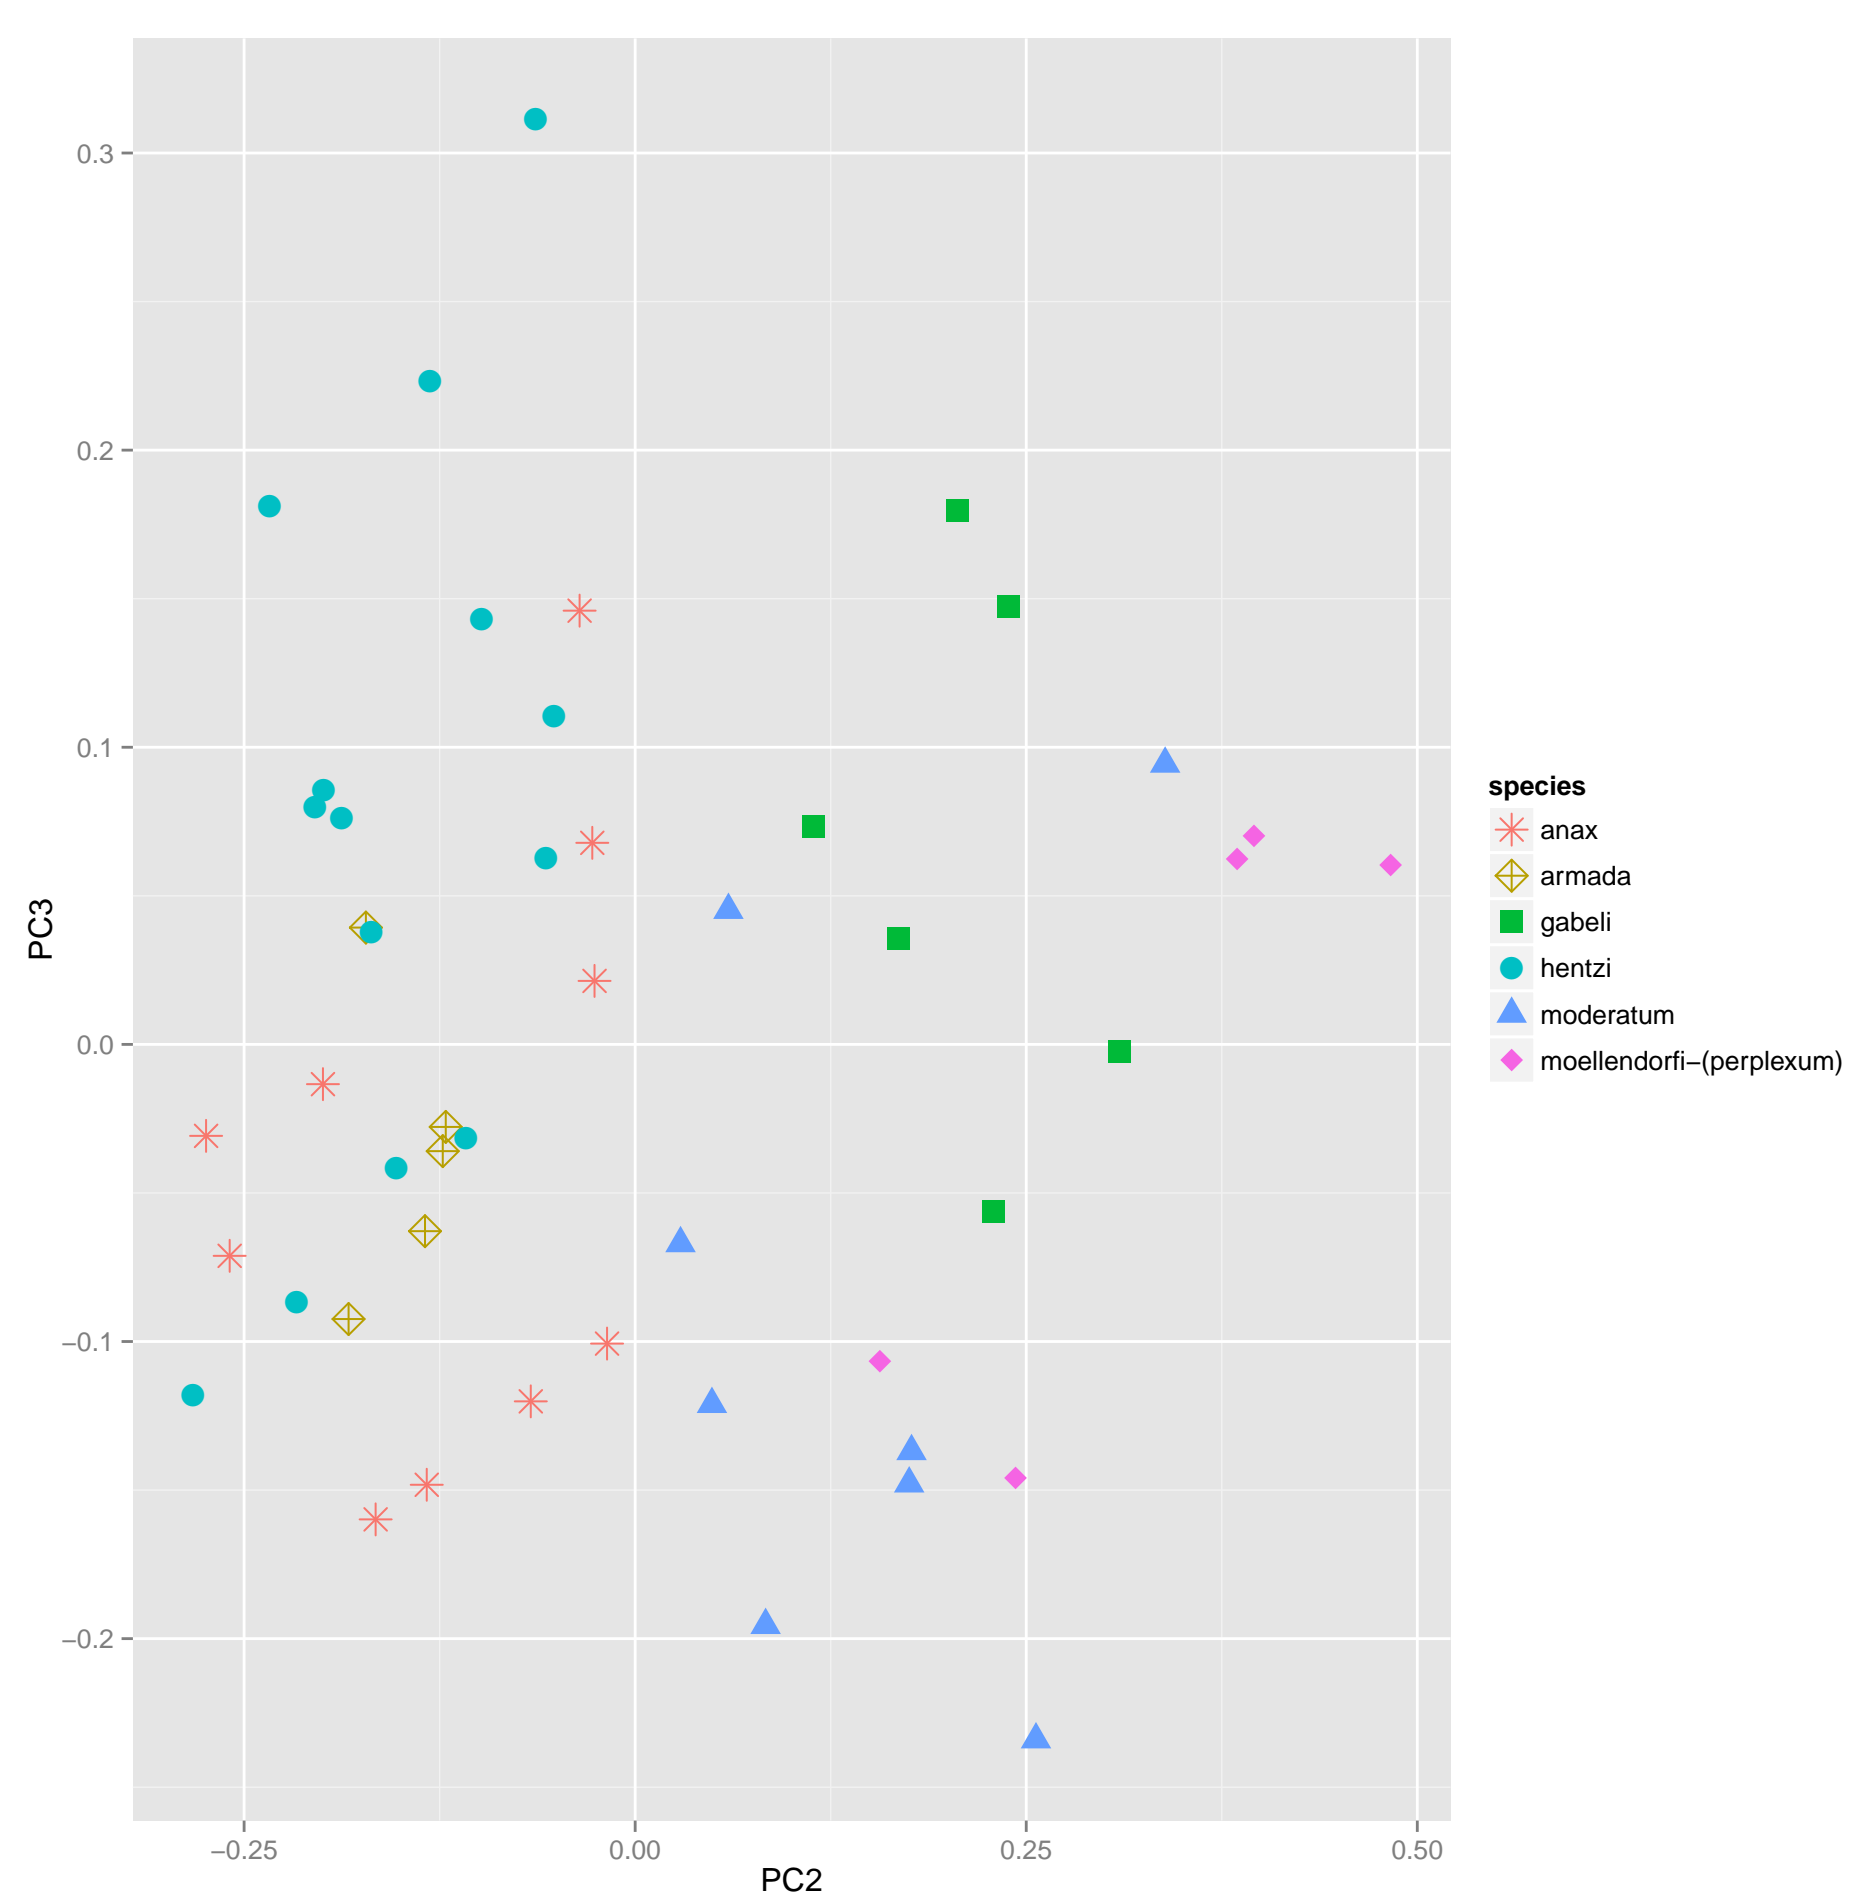

Supplement: Supplementary file 991

## Metatarsus 1/Tibia 3 Length ratio – females

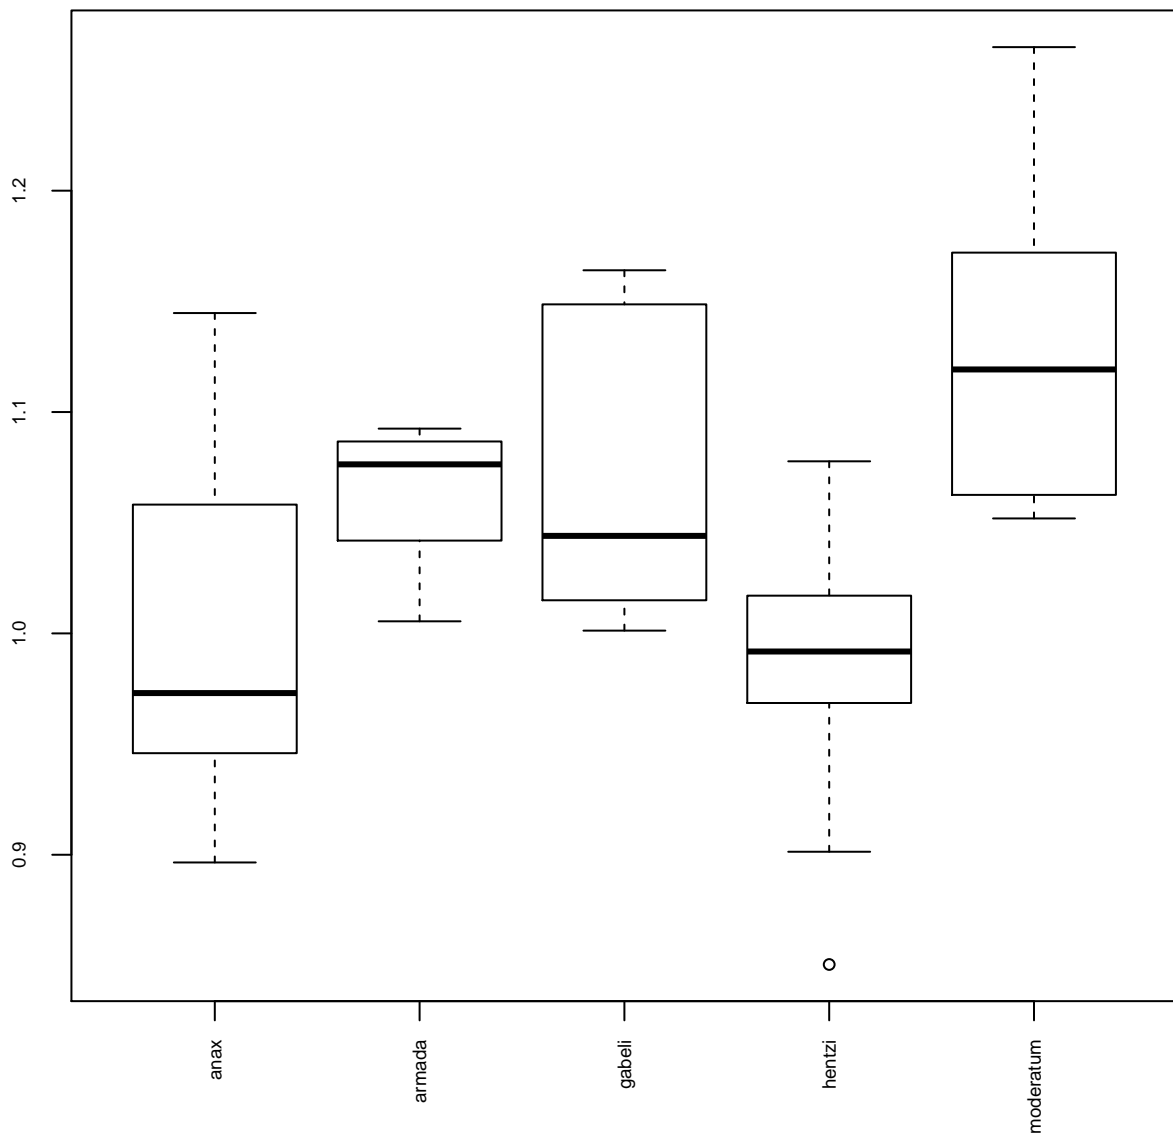

Supplement: Supplementary file 992

## Tibia 1/Femur 4 Length ratio – males

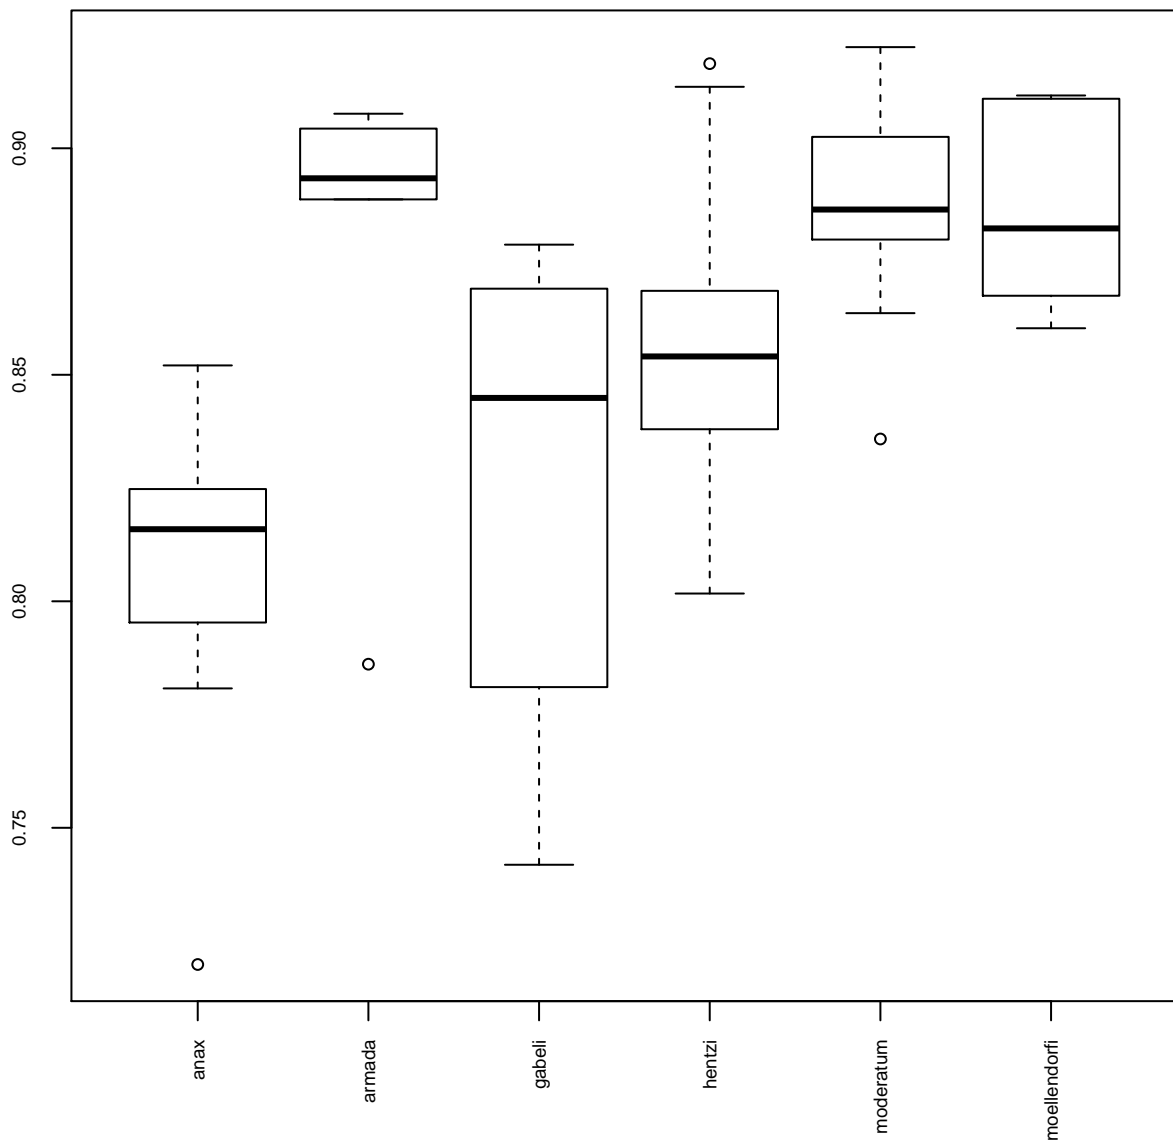

Supplement: Supplementary file 993

## Tibia 1/Patella 3 Length ratio – females

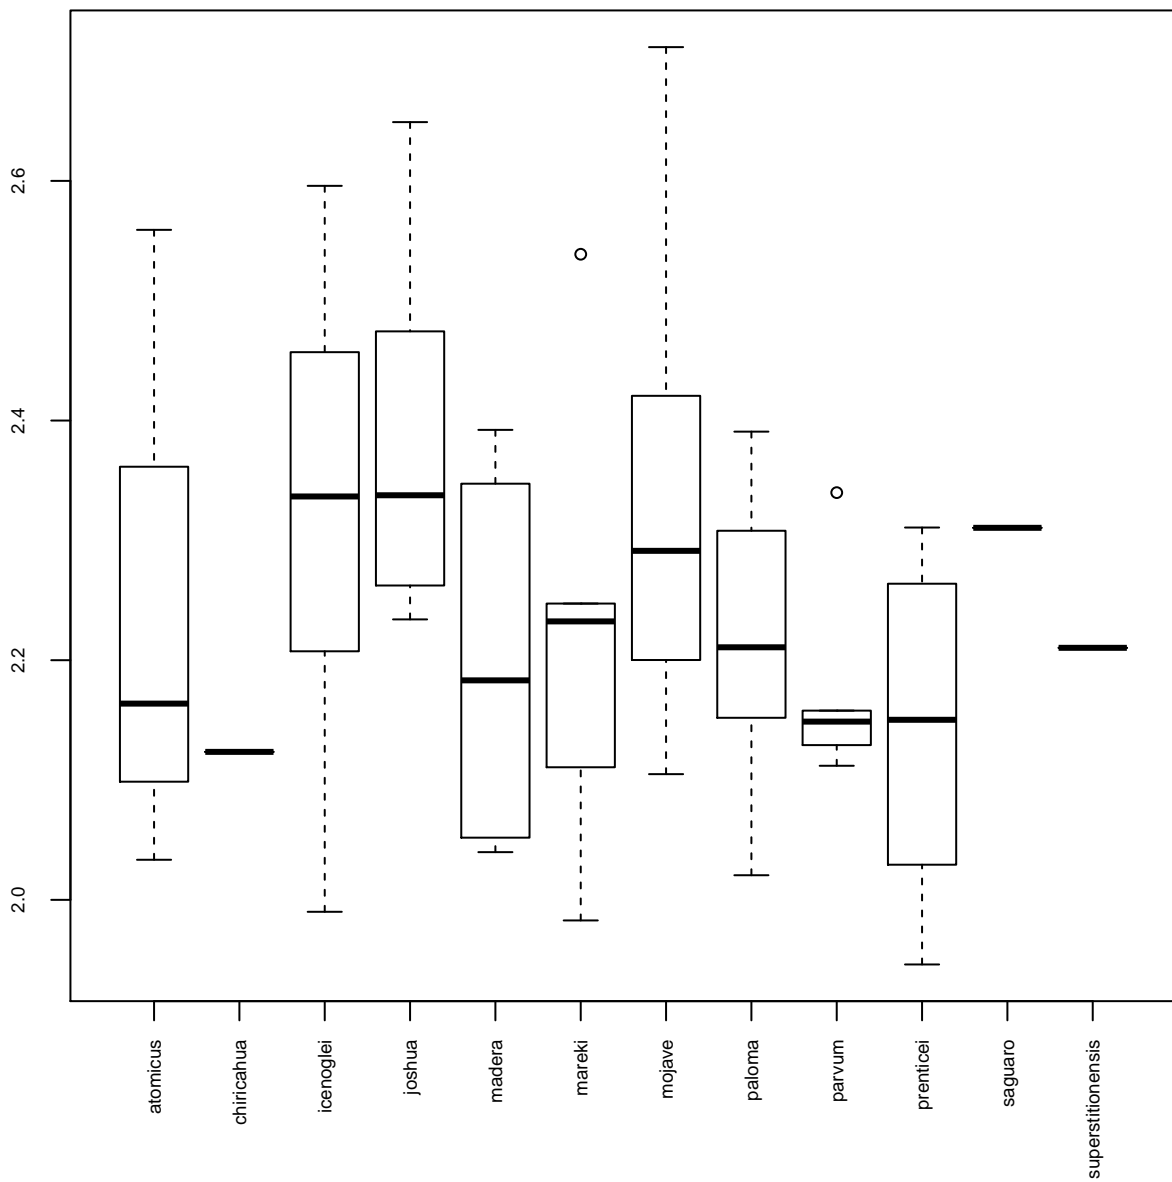

Supplement: Supplementary file 994

## Tarsus 1/Tibia 3 Length ratio – males

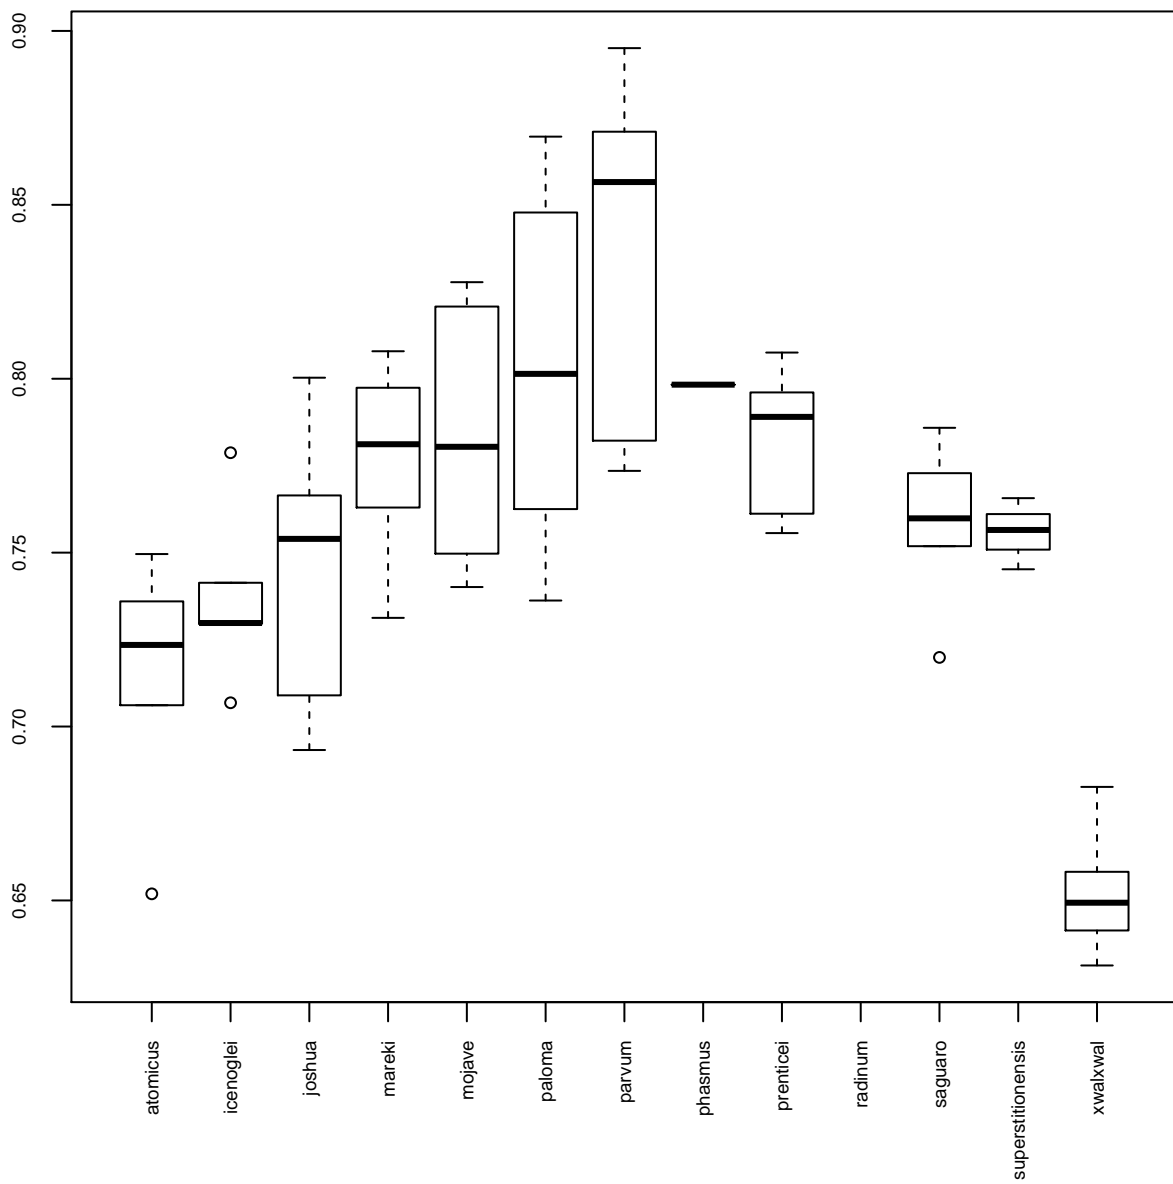

Supplement: Supplementary file 995

## Patella 1/Femur 4 Length ratio – females

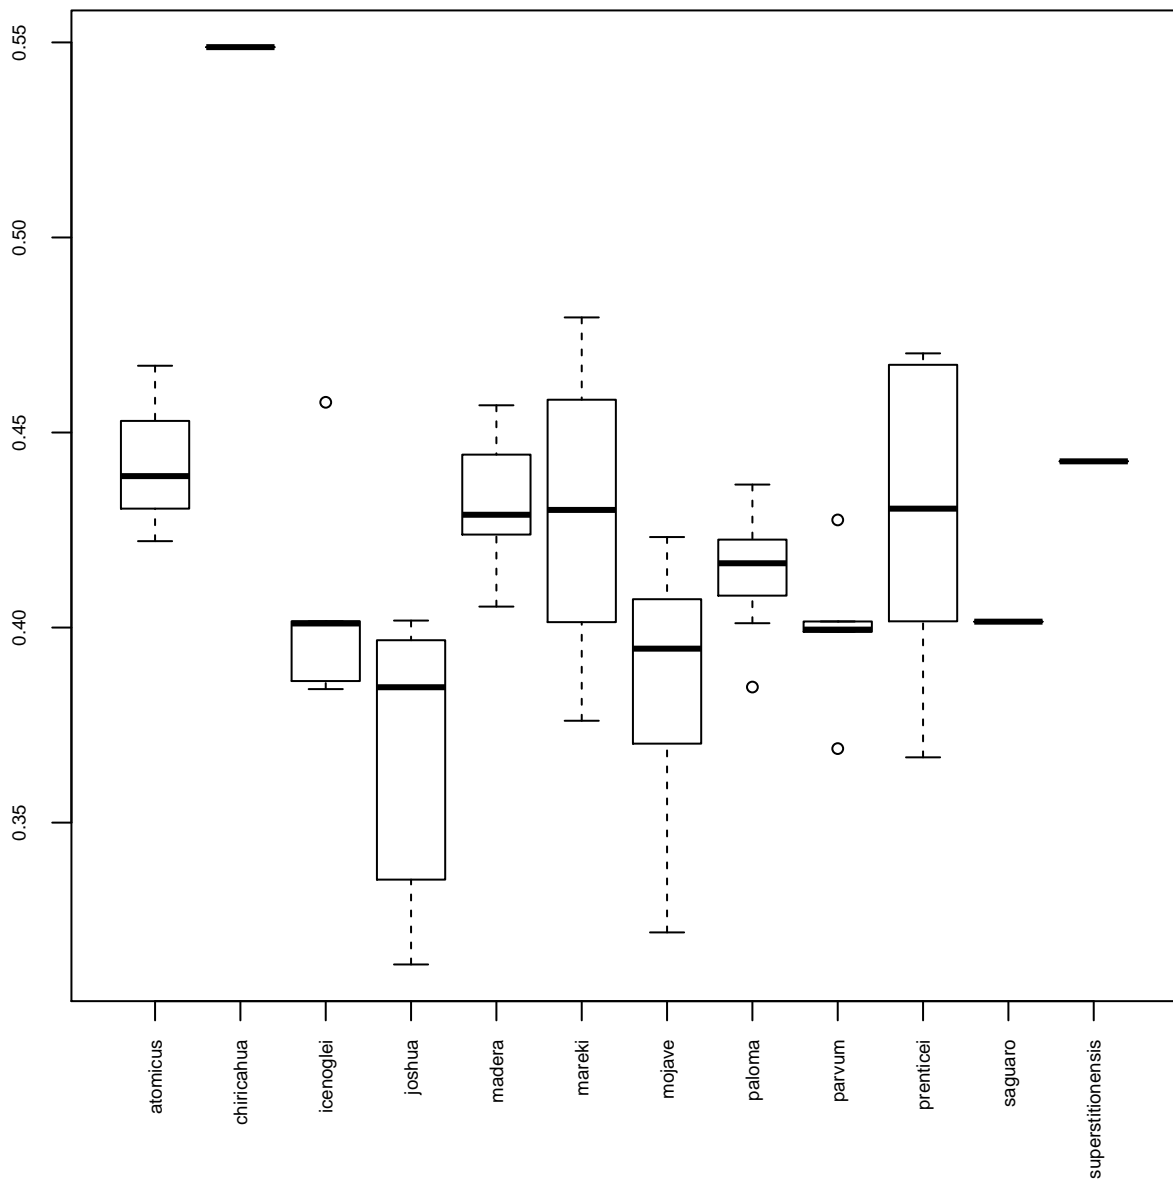

Supplement: Supplementary file 996

## Metatarsus 4/Tarsus 4 ratio – females

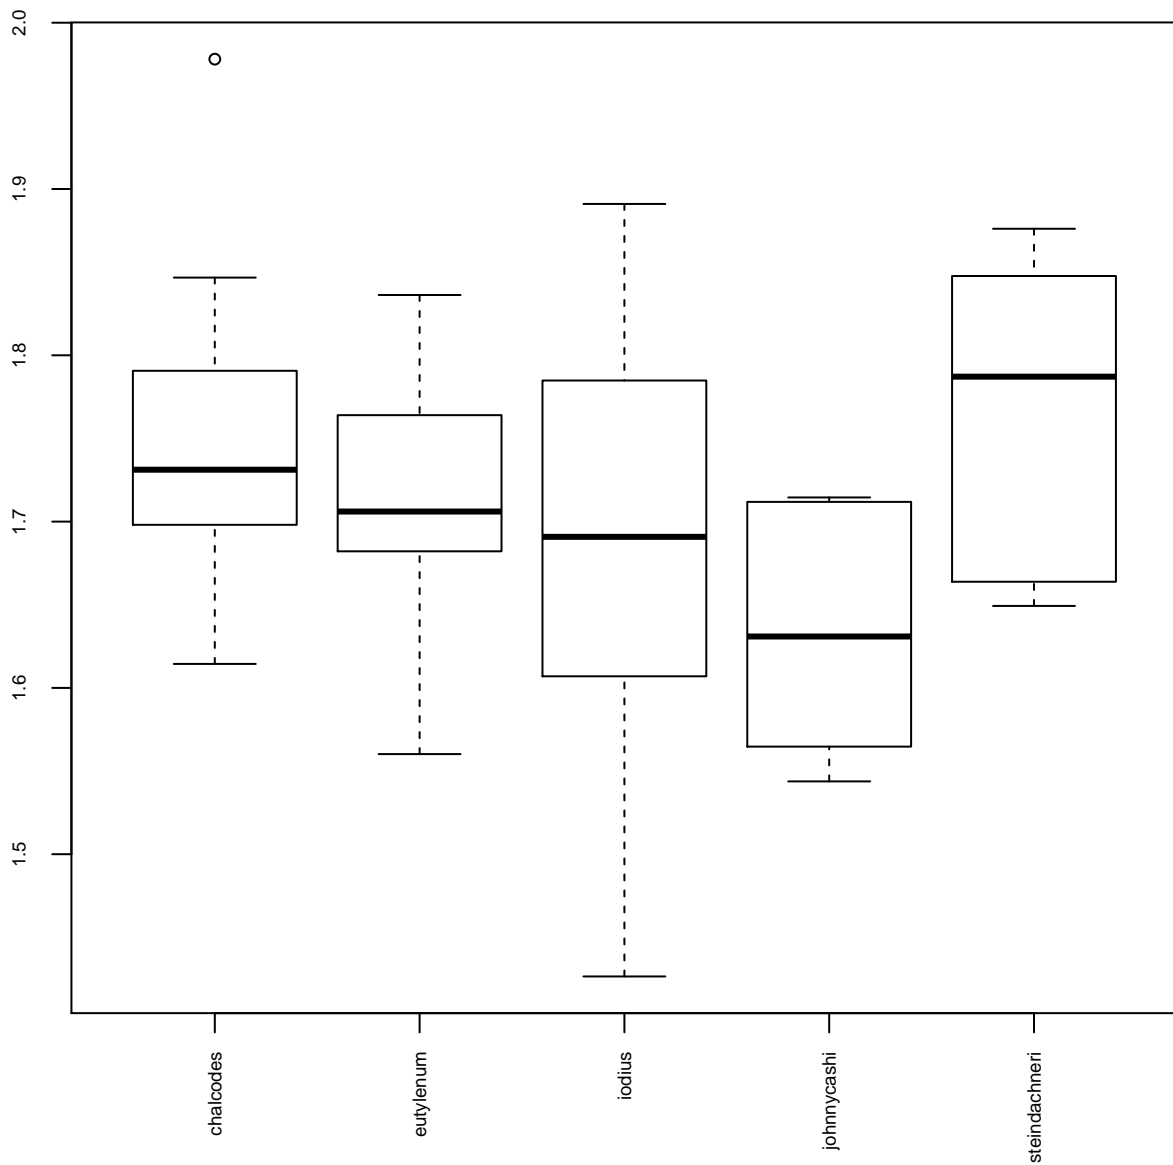

Supplement: Supplementary file 997

## Metatarsus 1/Metatarsus 4 ratio – males

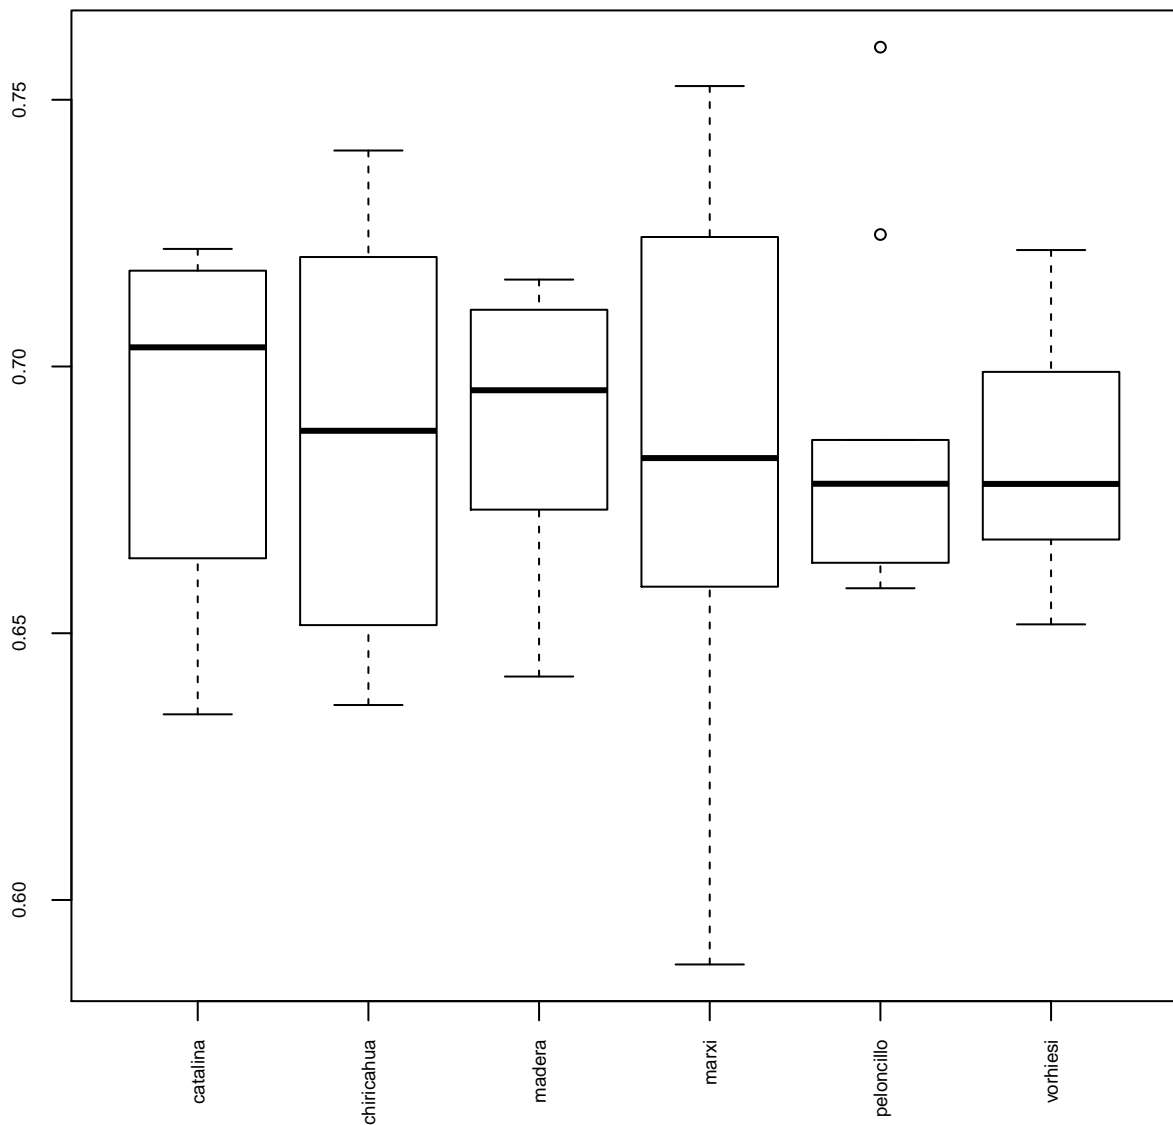

Supplement: Supplementary file 998

## Metatarsus 1/Tarsus 4 Length ratio – females

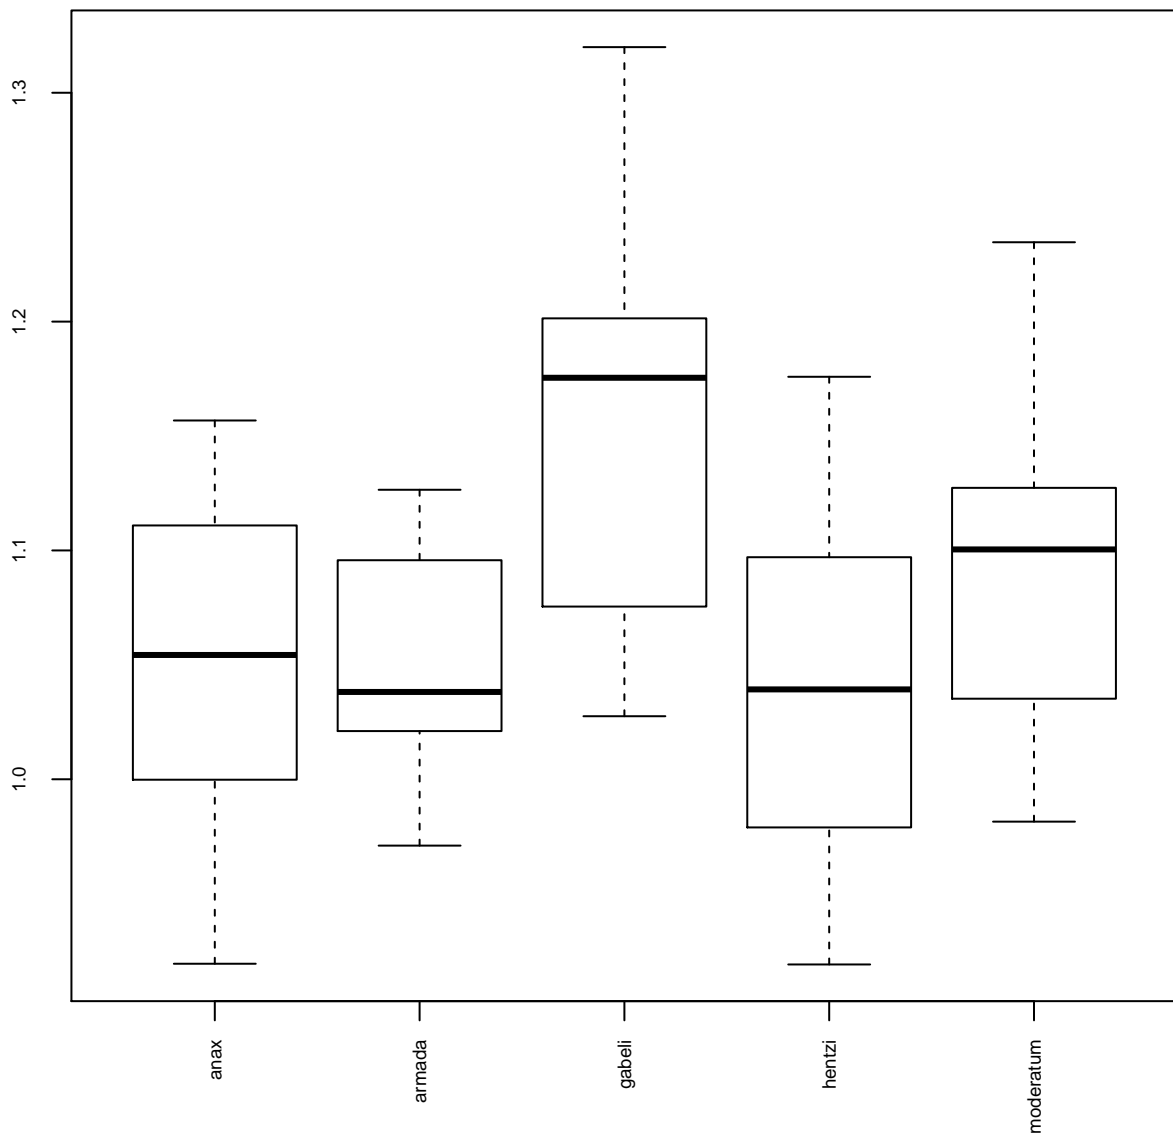

Supplement: Supplementary file 999

## Tarsus 1/Tibia 4 Length ratio – males

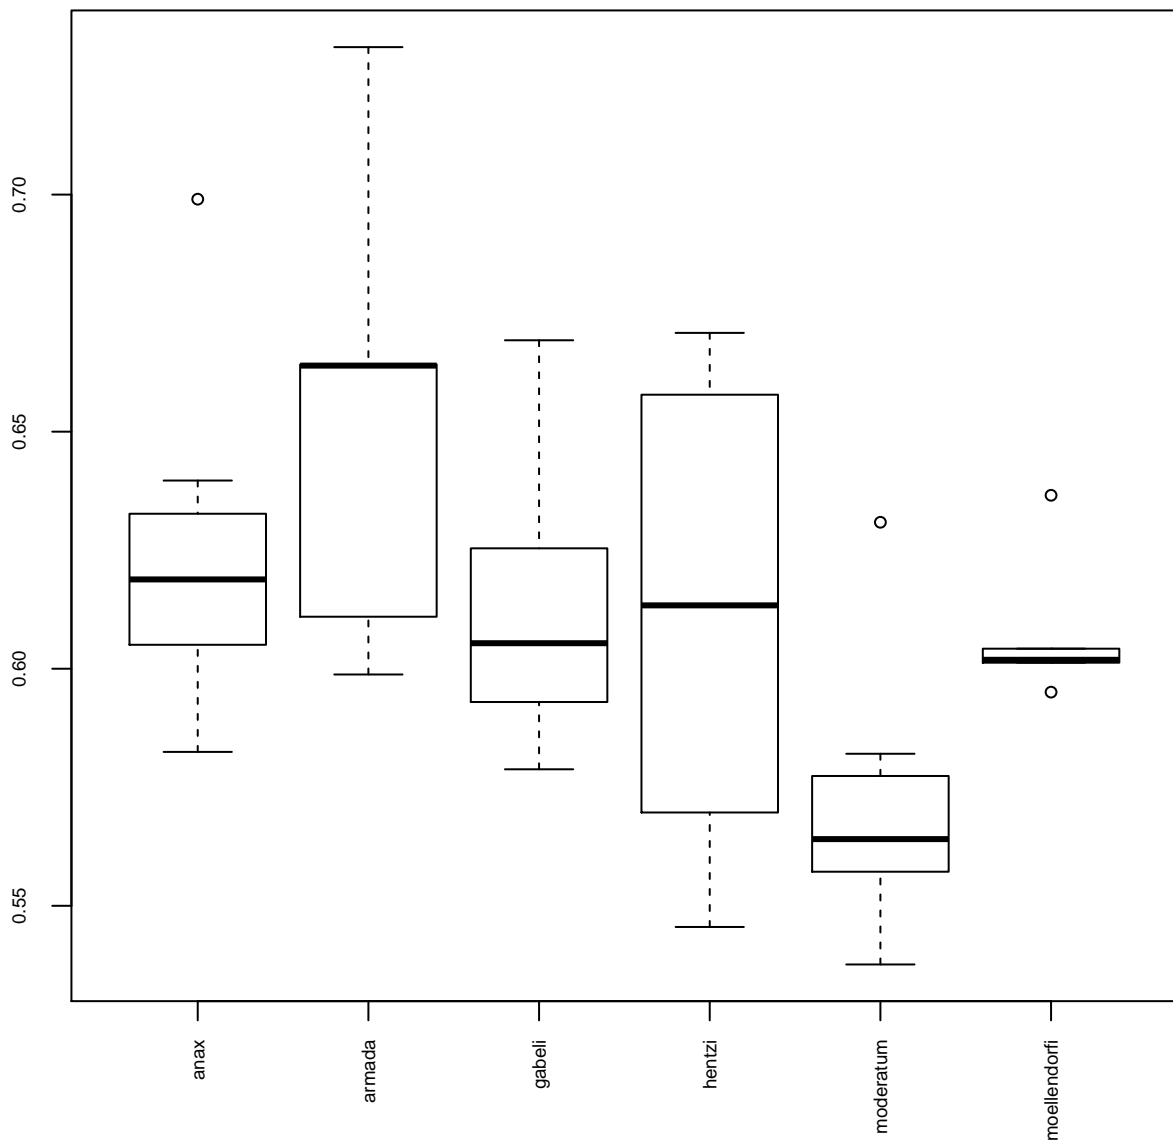

Supplement: Supplementary file 1000
