# Supplementary material (part 11 of 15)
Source: publisher site journal article supplement (http://zookeys.pensoft.net/article/6264/download/suppl/32/)

## Leg 1/Leg 3 Length ratio – males

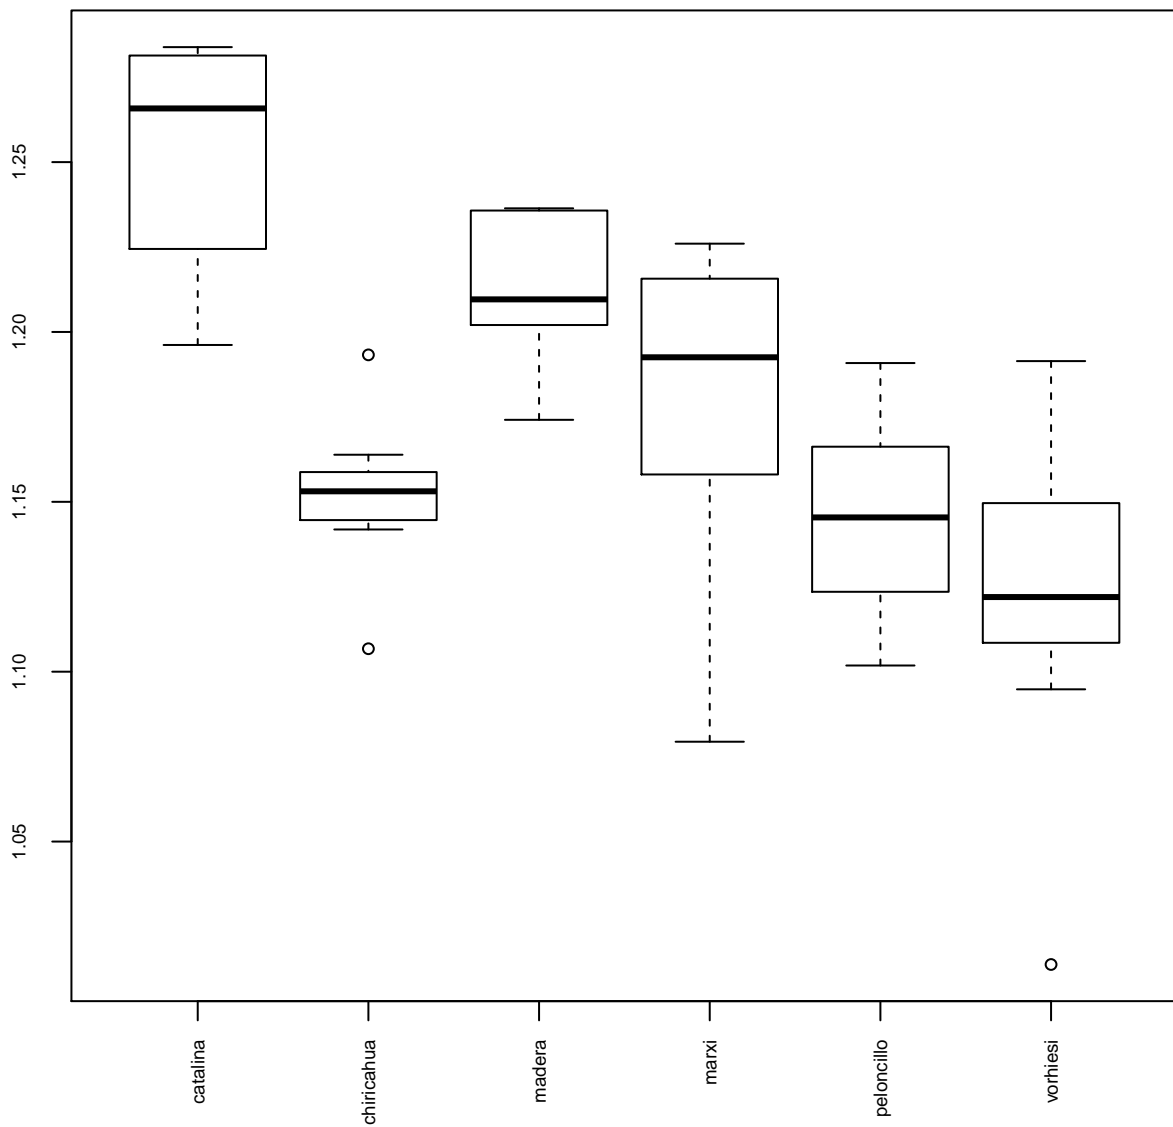

Supplement: Supplementary file 1001

# Patella 1/Femur 4 Length ratio – males

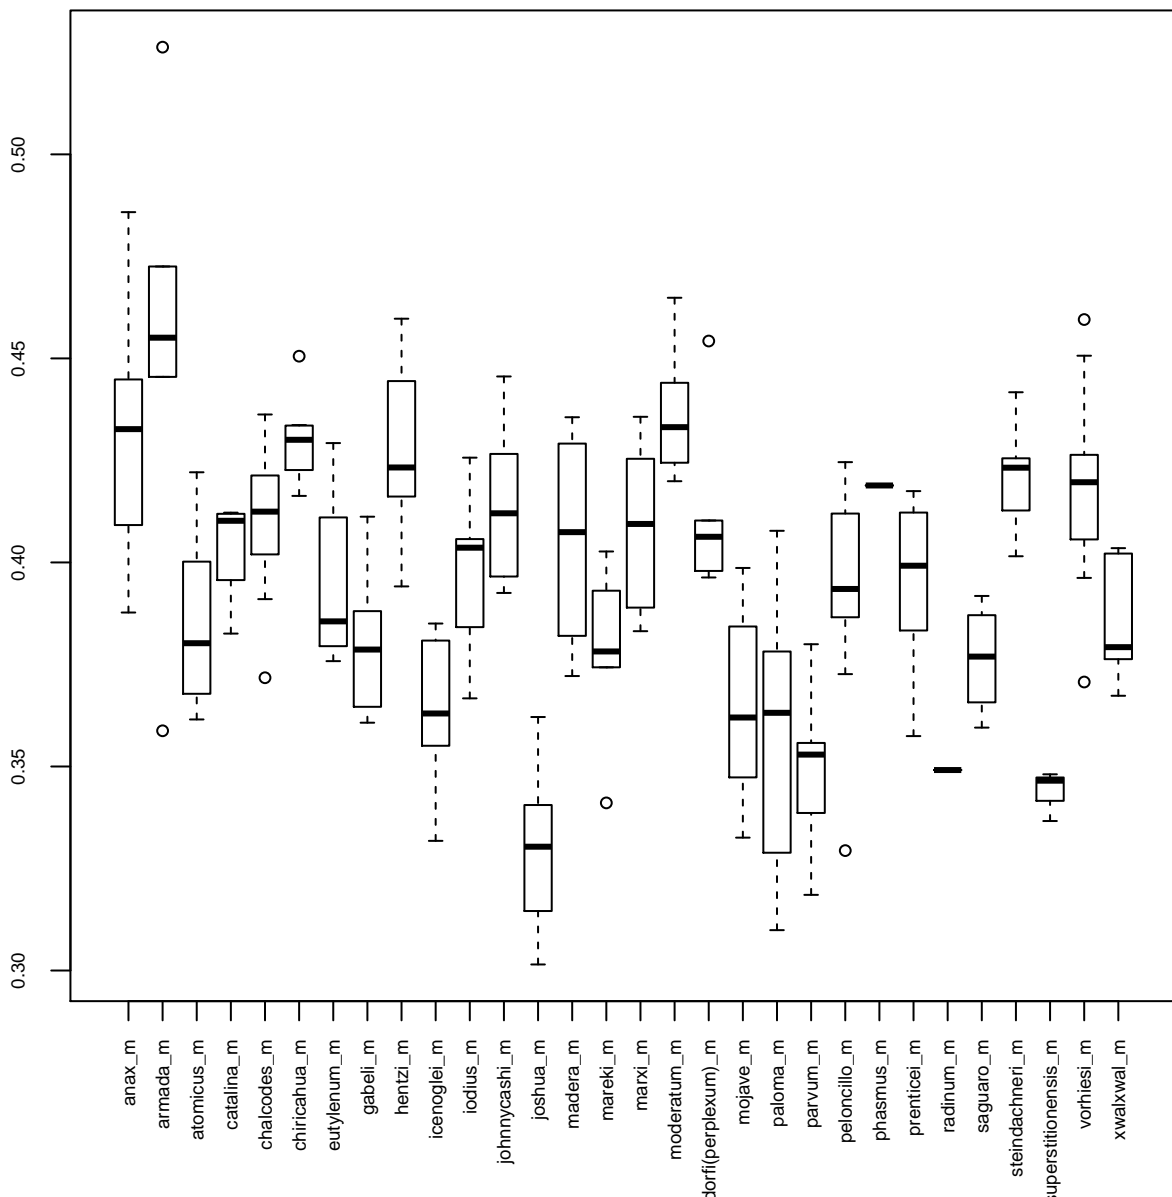

Supplement: Supplementary file 1002

# Patella 1/Tibia 4 Length ratio – males

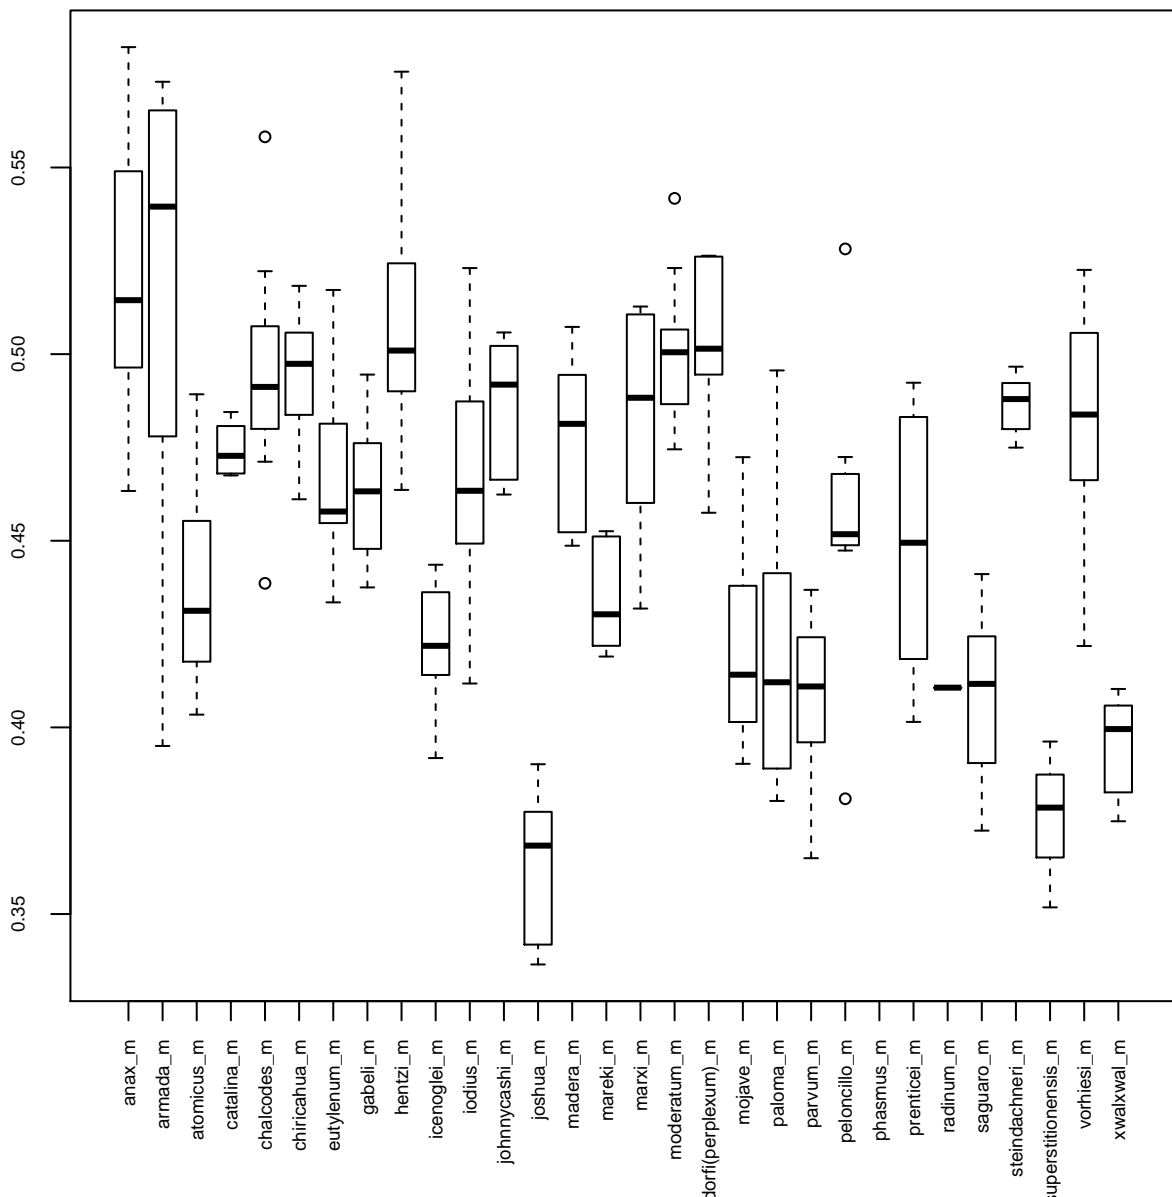

Supplement: Supplementary file 1003

## Tarsus 1/Patella 4 Length ratio – males

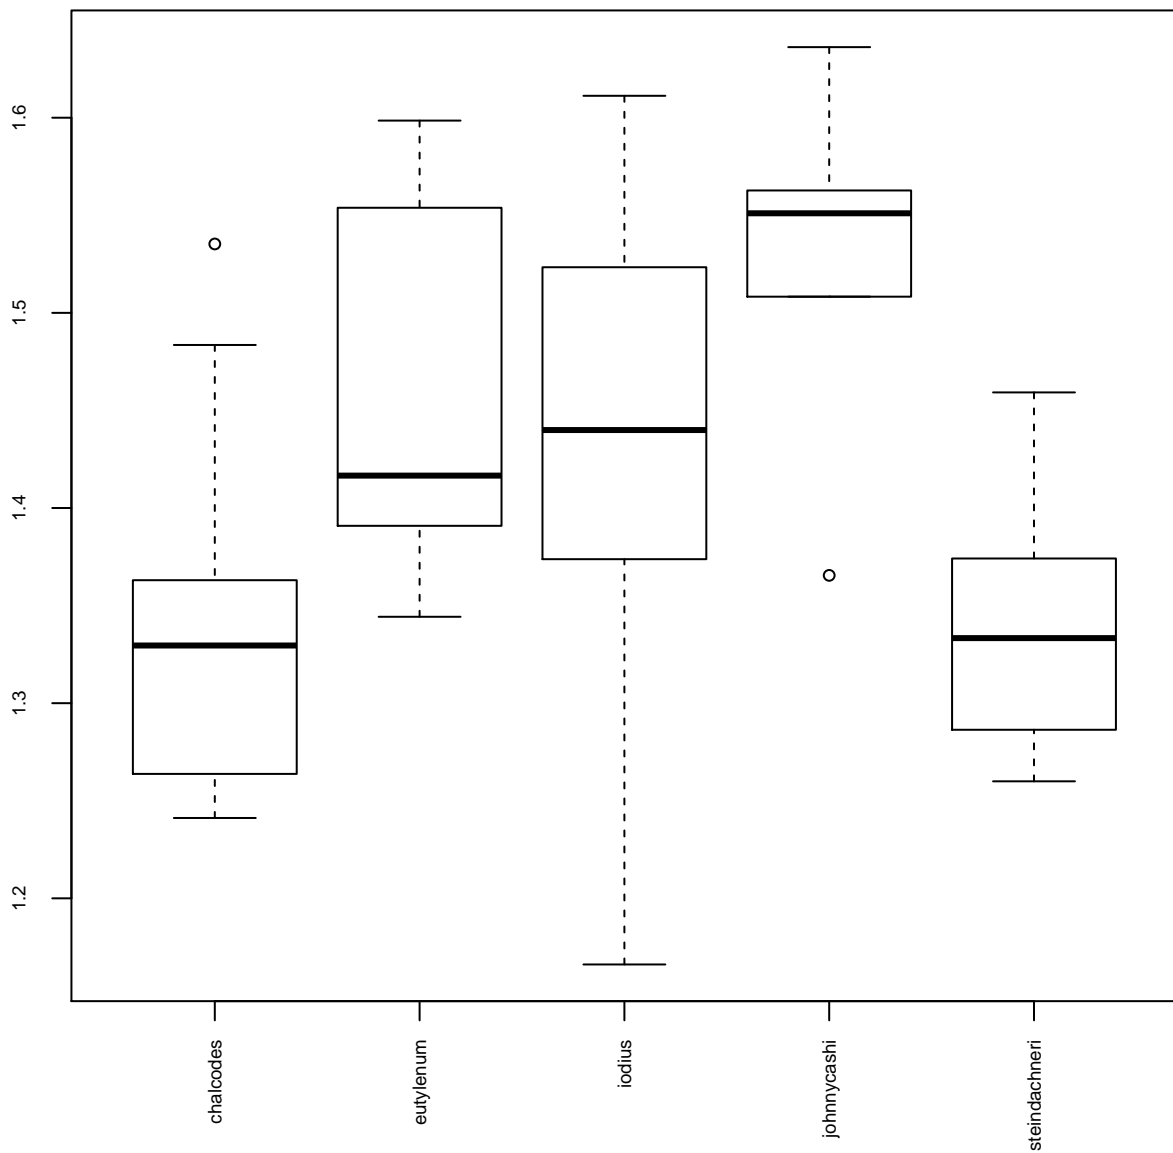

Supplement: Supplementary file 1004

# Femur 4/Tarsus 4 ratio – males

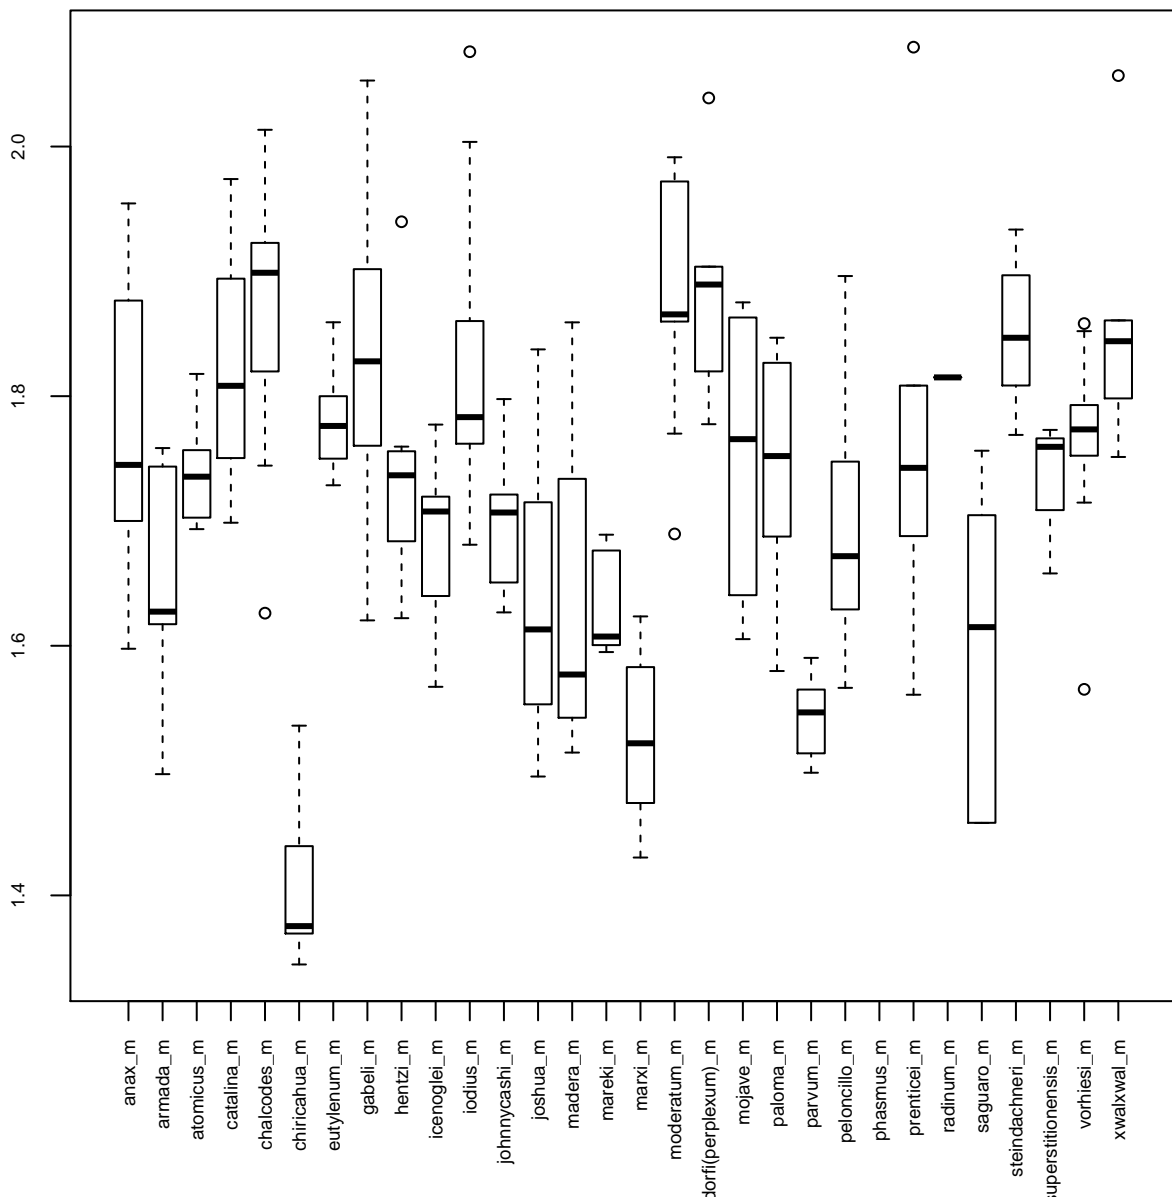

Supplement: Supplementary file 1005

## Tarsus 1/Metatarsus 3 Length ratio – males

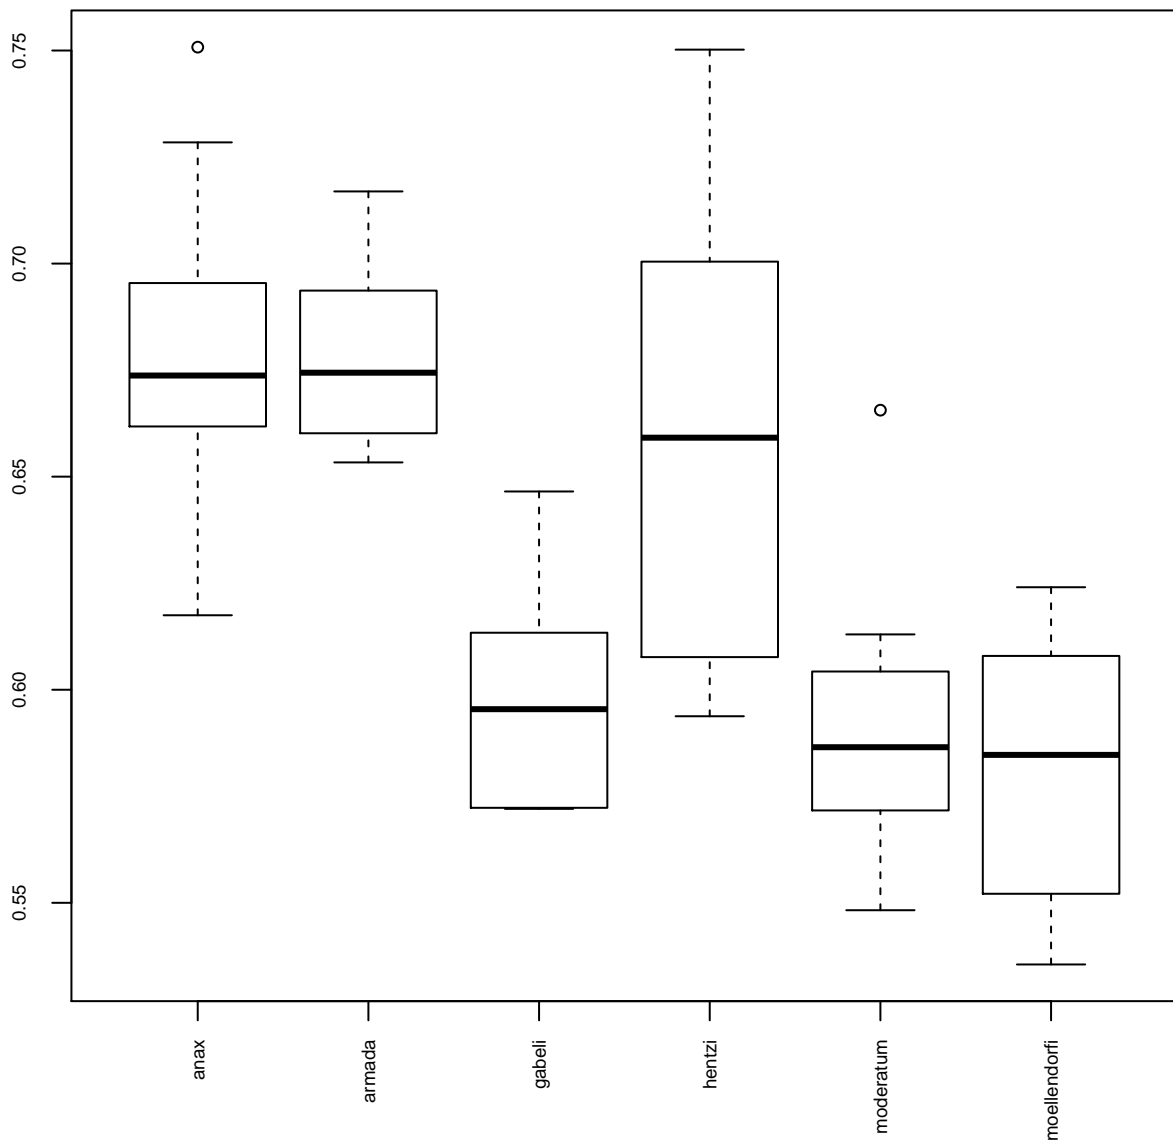

Supplement: Supplementary file 1006

## Leg 3/Leg 4 Length ratio – females

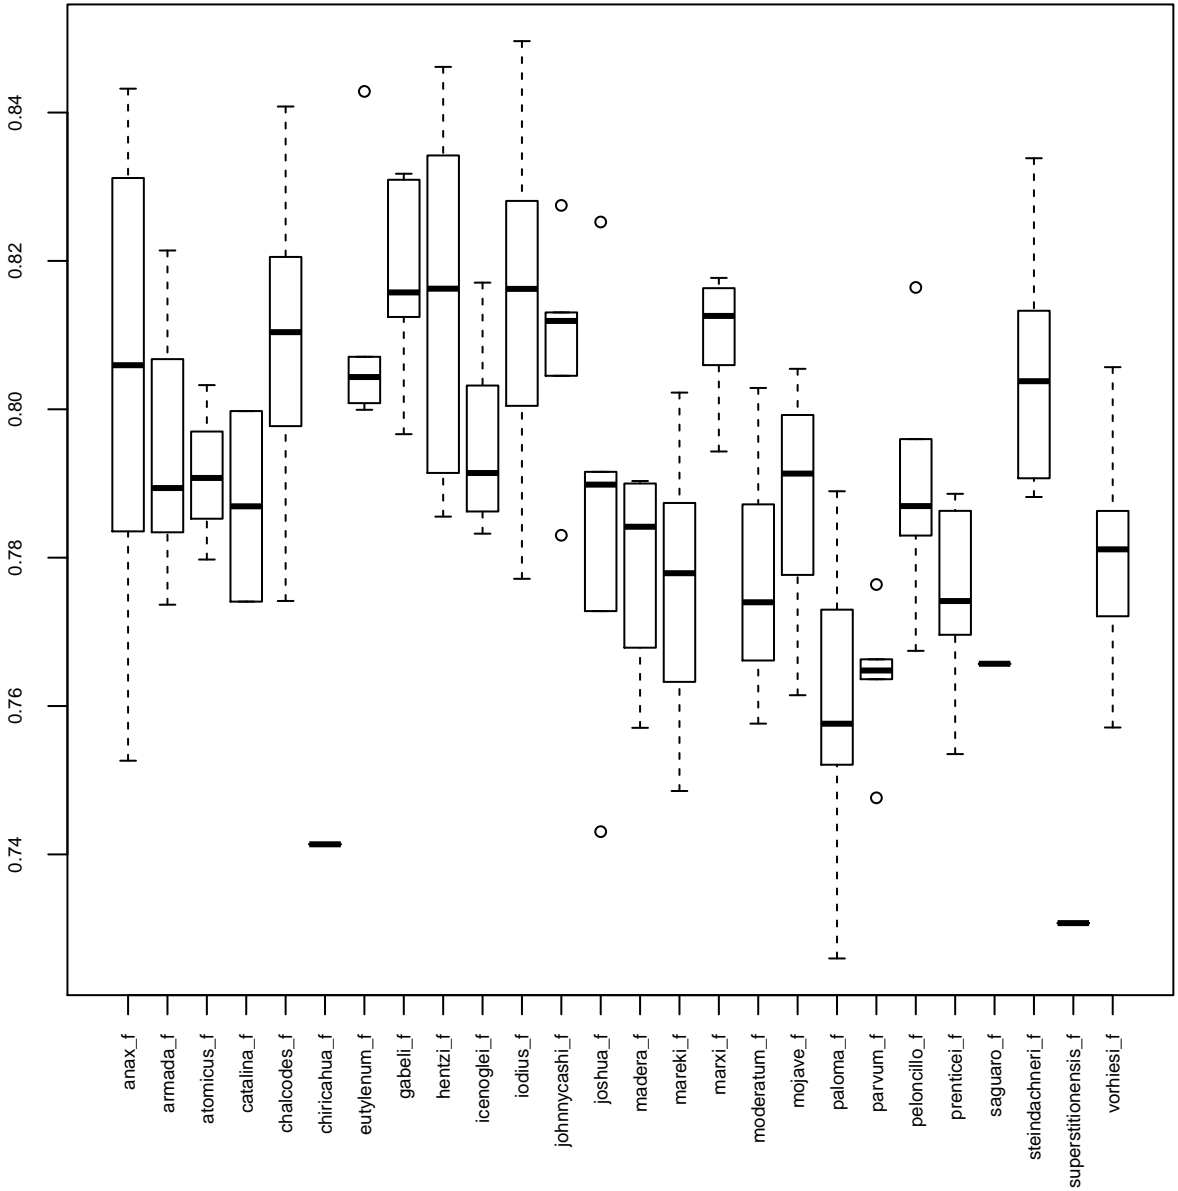

Supplement: Supplementary file 1007

## Femur 1/Tarsus 1 ratio – females

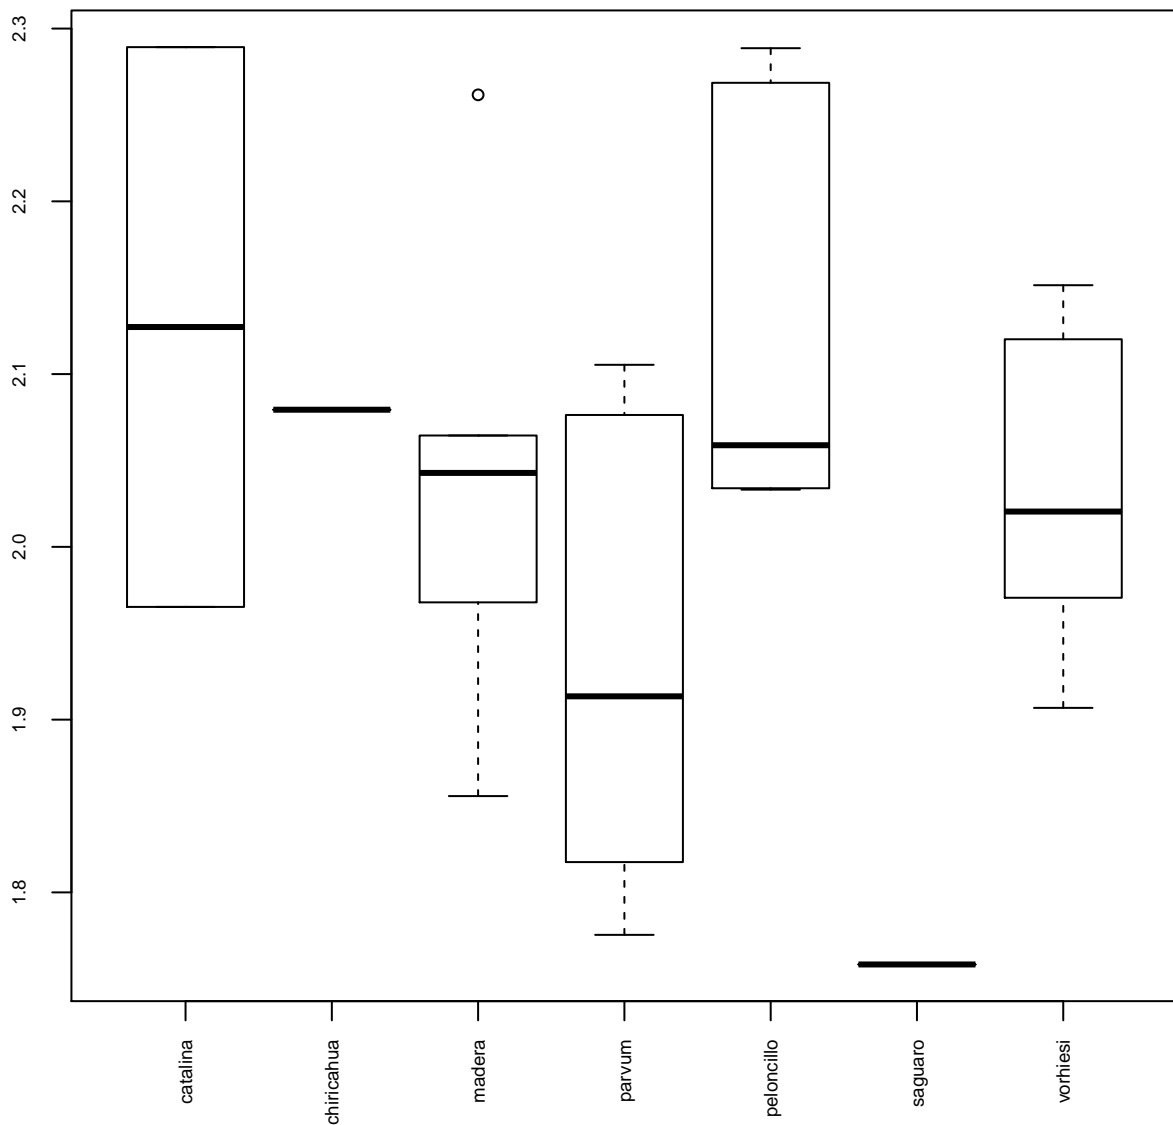

Supplement: Supplementary file 1008

# Leg 4 Length/Carapace Length ratio – females

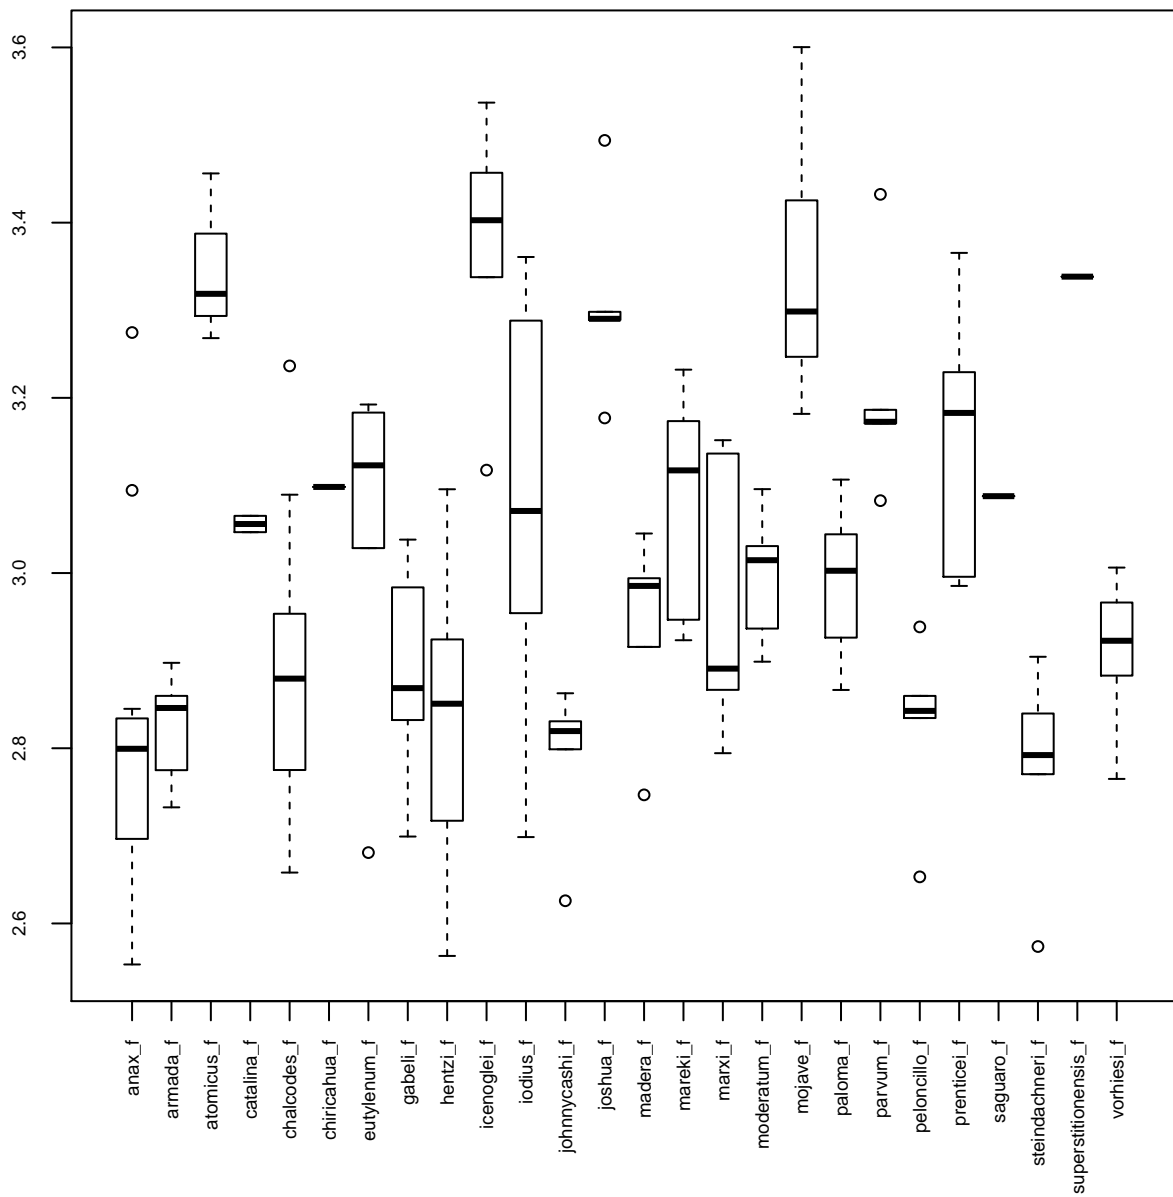

Supplement: Supplementary file 1009

## Carapace Length – females

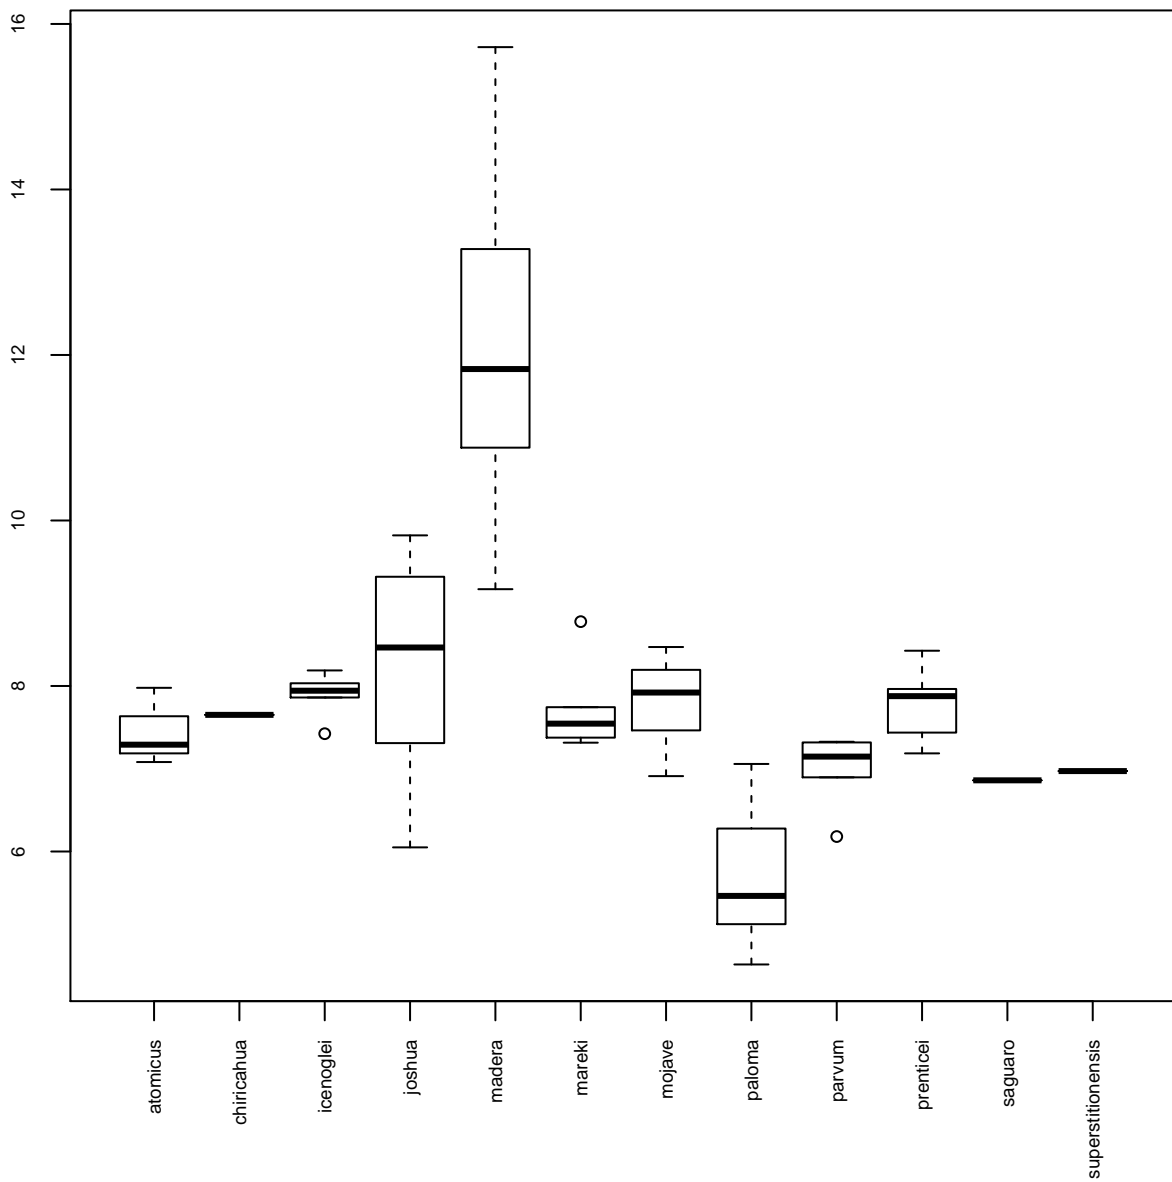

Supplement: Supplementary file 1010

## Tarsus 3/Patella 4 Length ratio – males

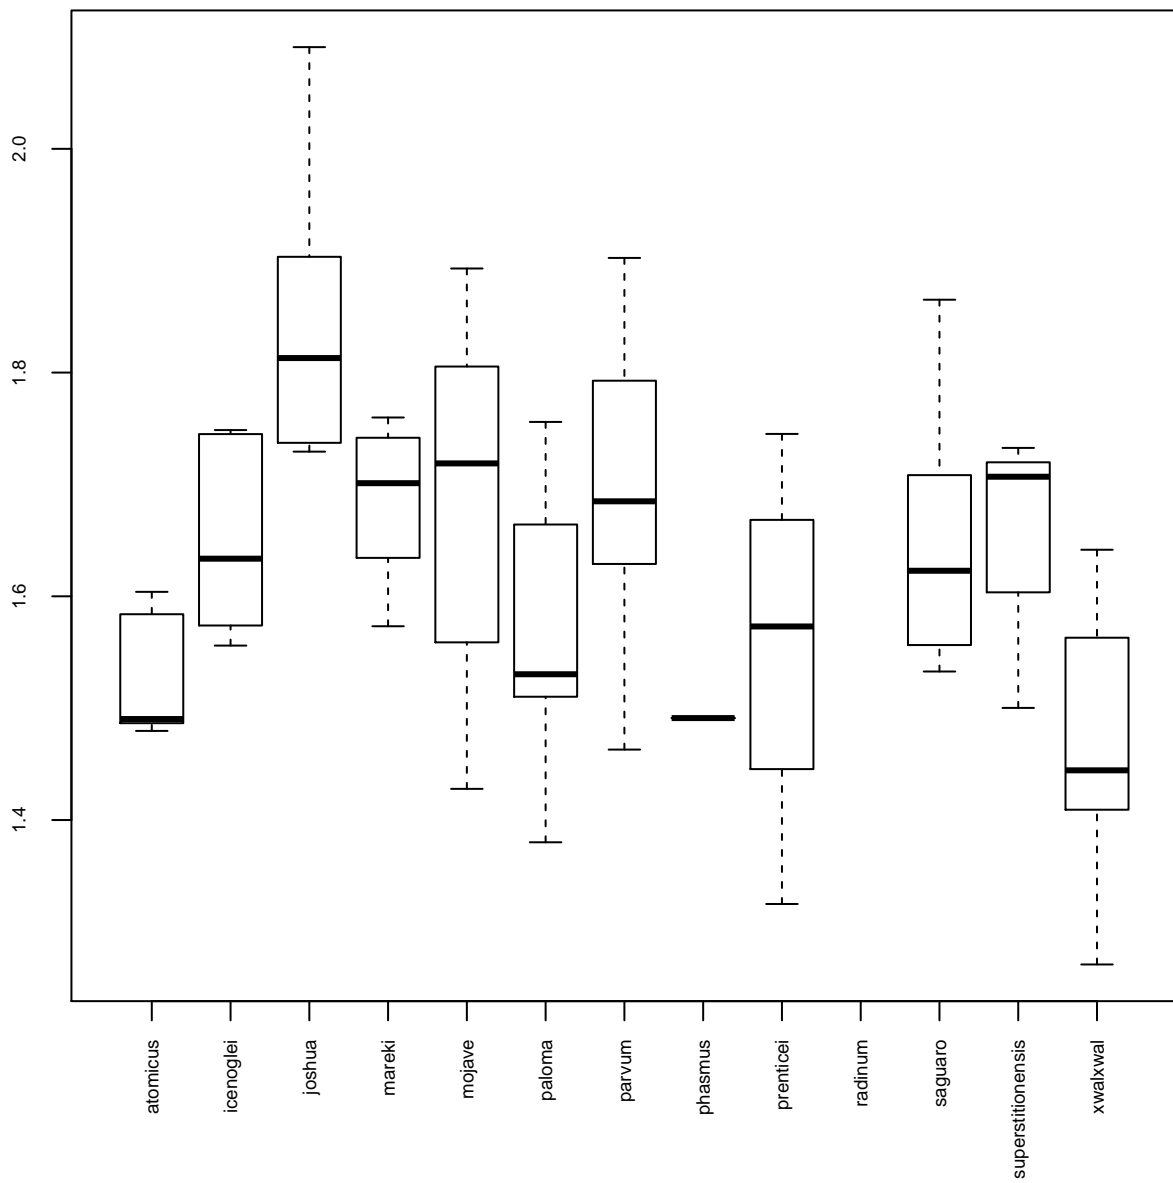

Supplement: Supplementary file 1011

## Metatarsus 1/Tibia 4 Length ratio – females

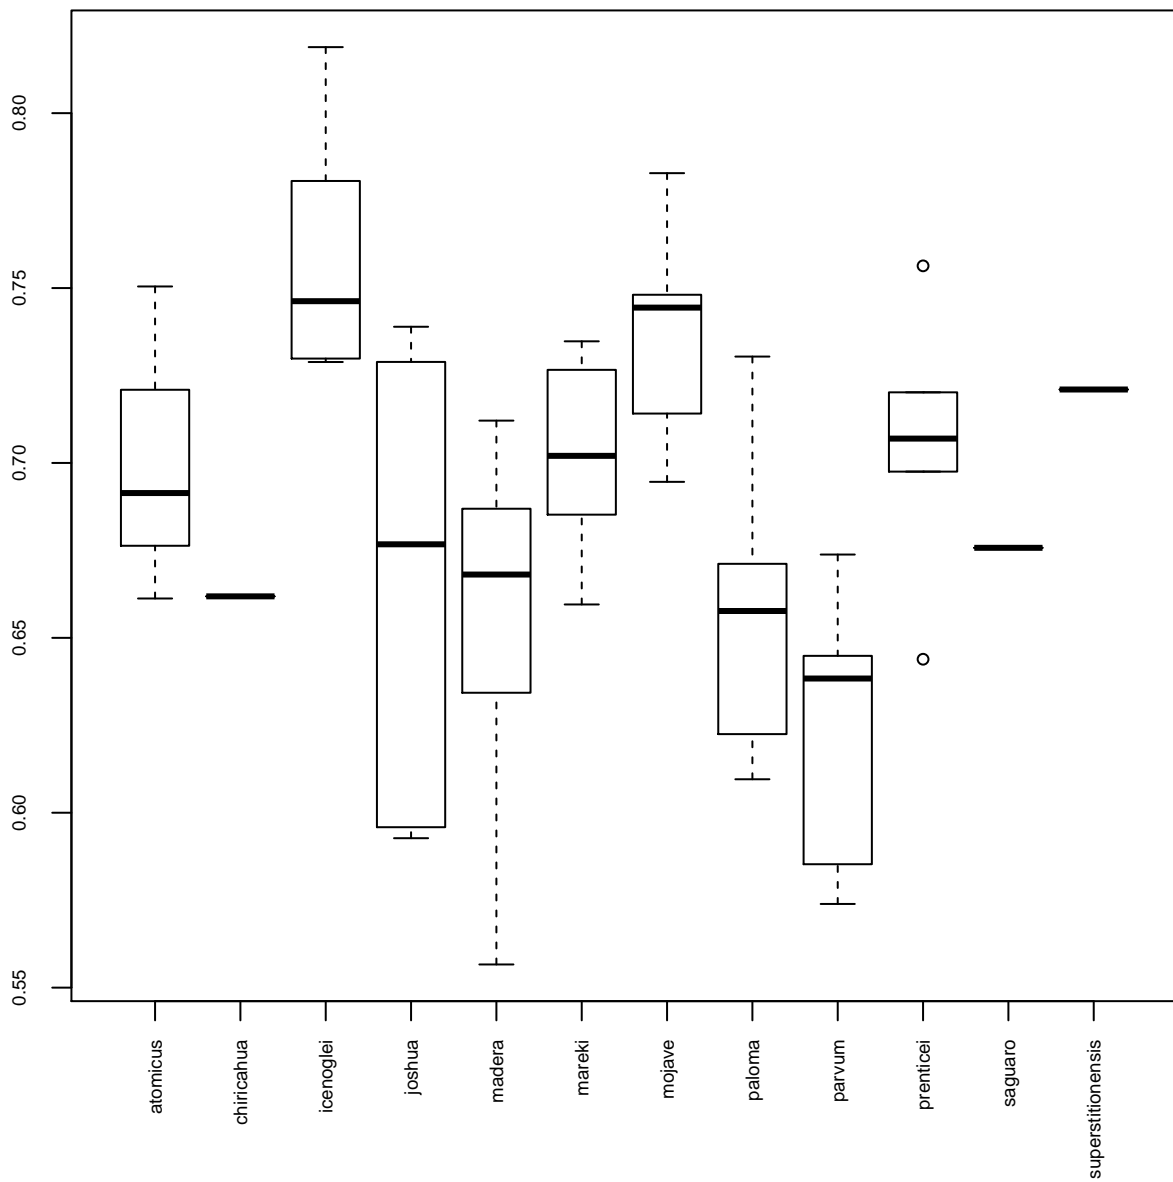

Supplement: Supplementary file 1012

## Femur 1 Length/Width ratio – females

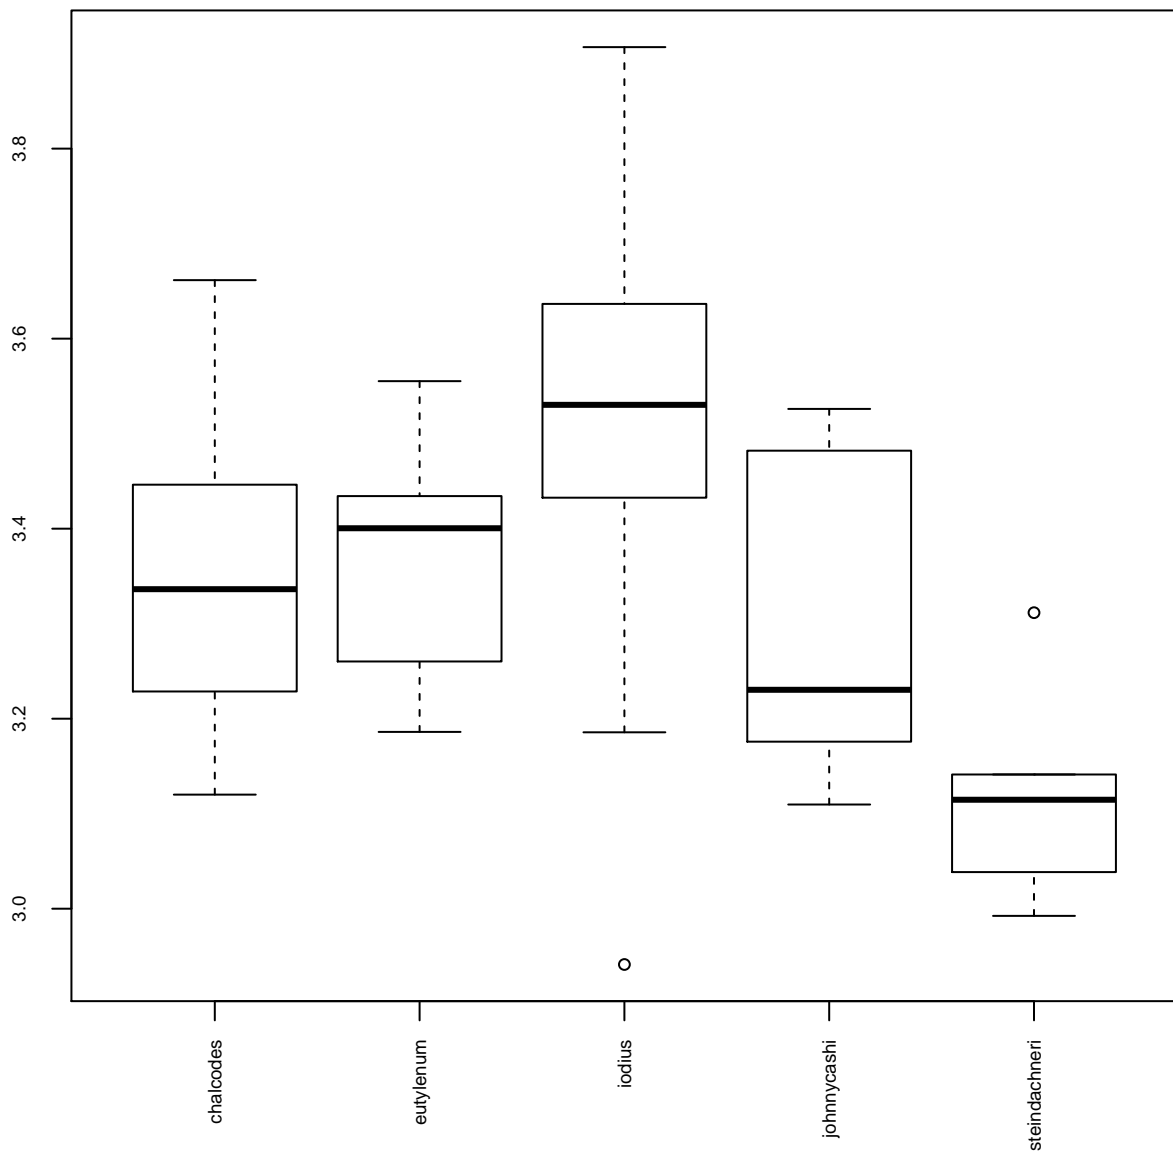

Supplement: Supplementary file 1013

## Tarsus 3/Tarsus 4 ratio – males

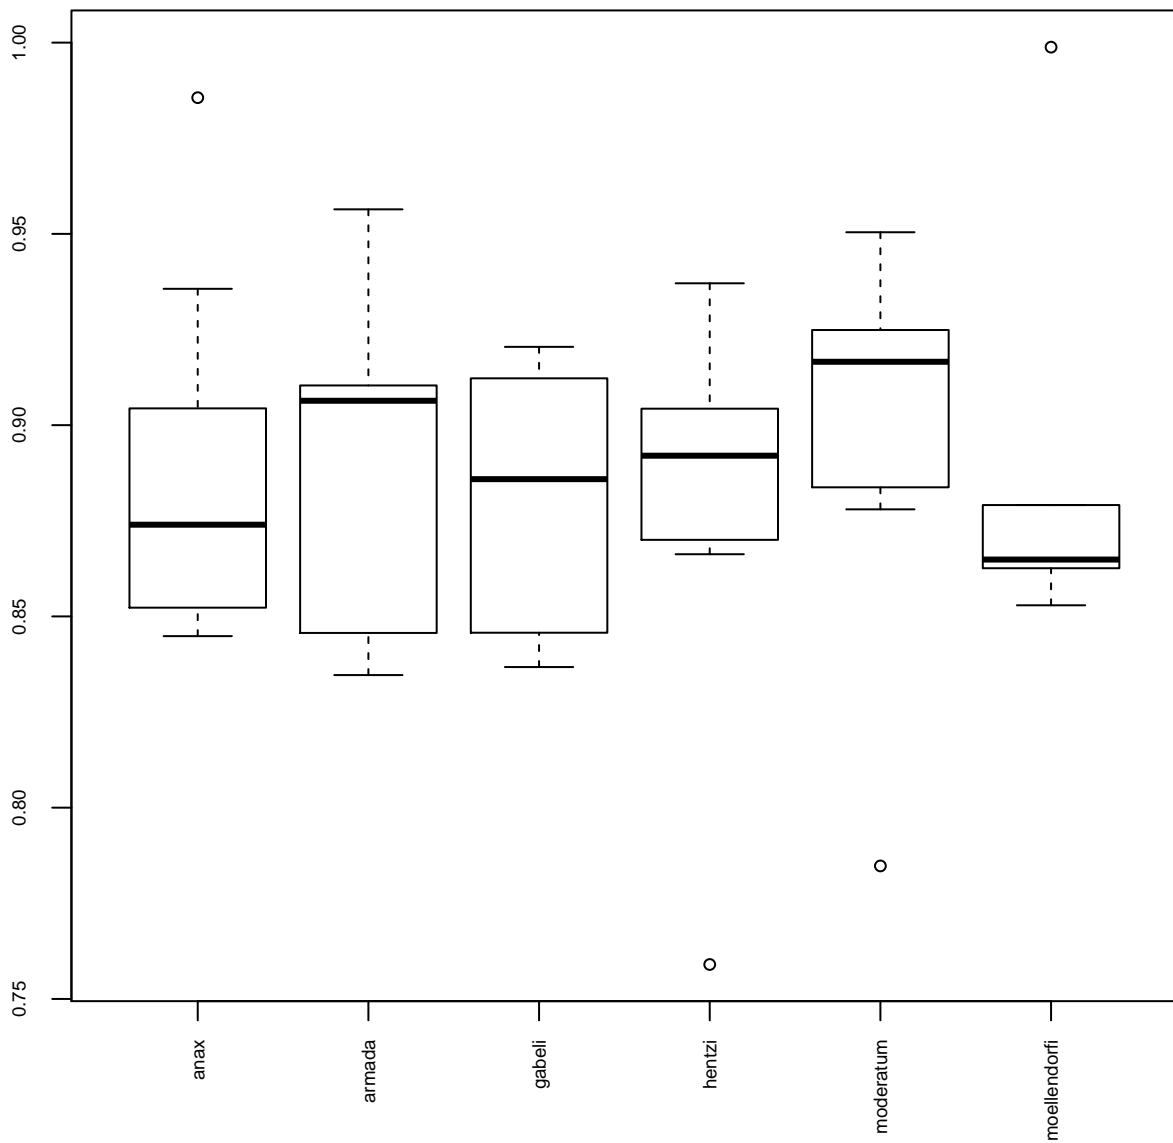

Supplement: Supplementary file 1014

## Femur 3 Length/Width ratio – males

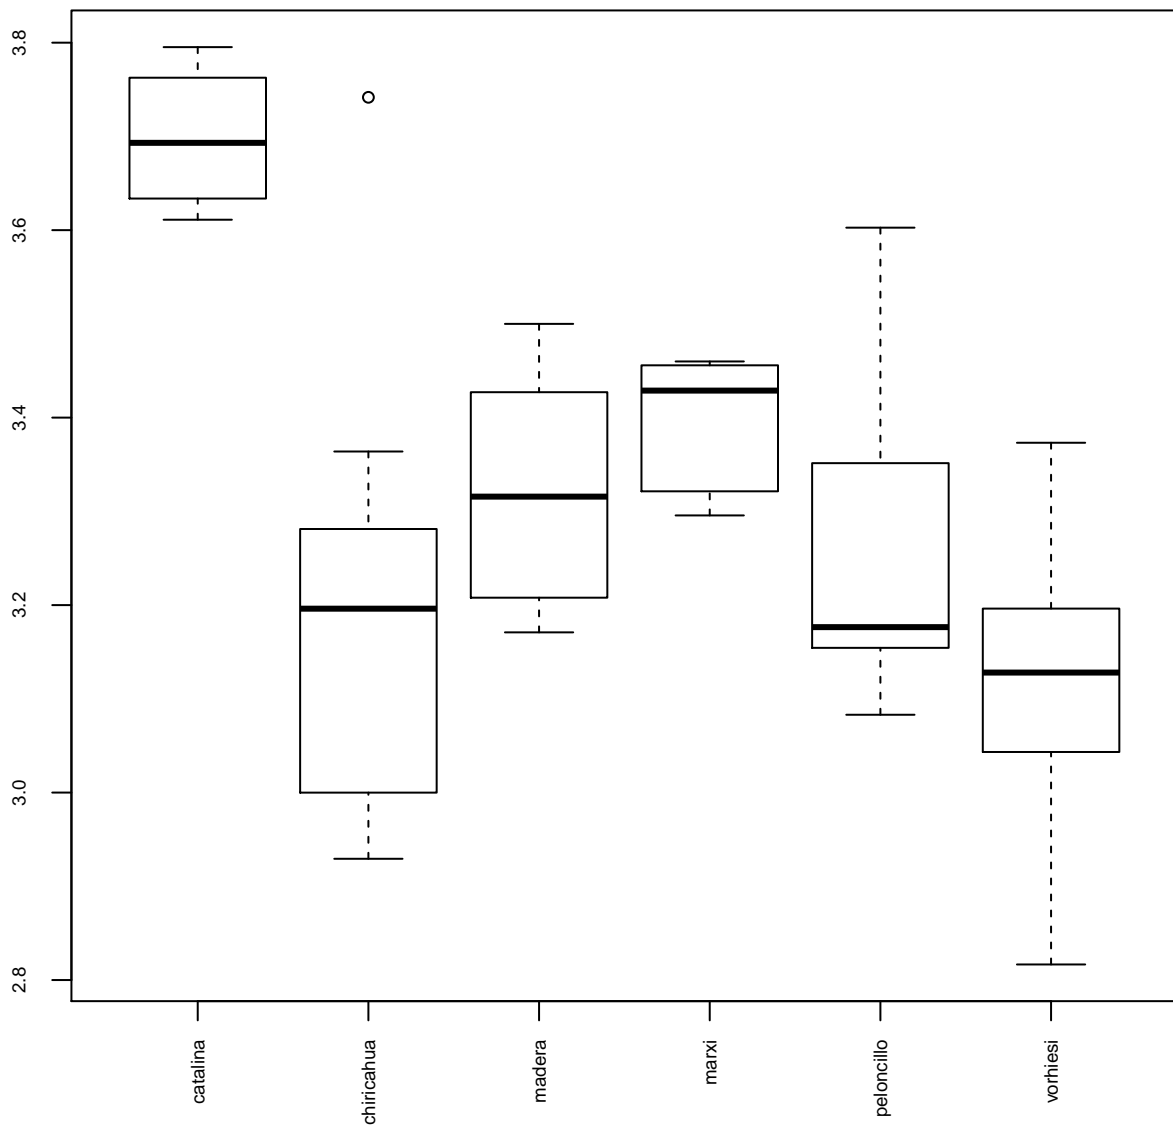

Supplement: Supplementary file 1015

## Carapace Length/Femur 1 ratio – males

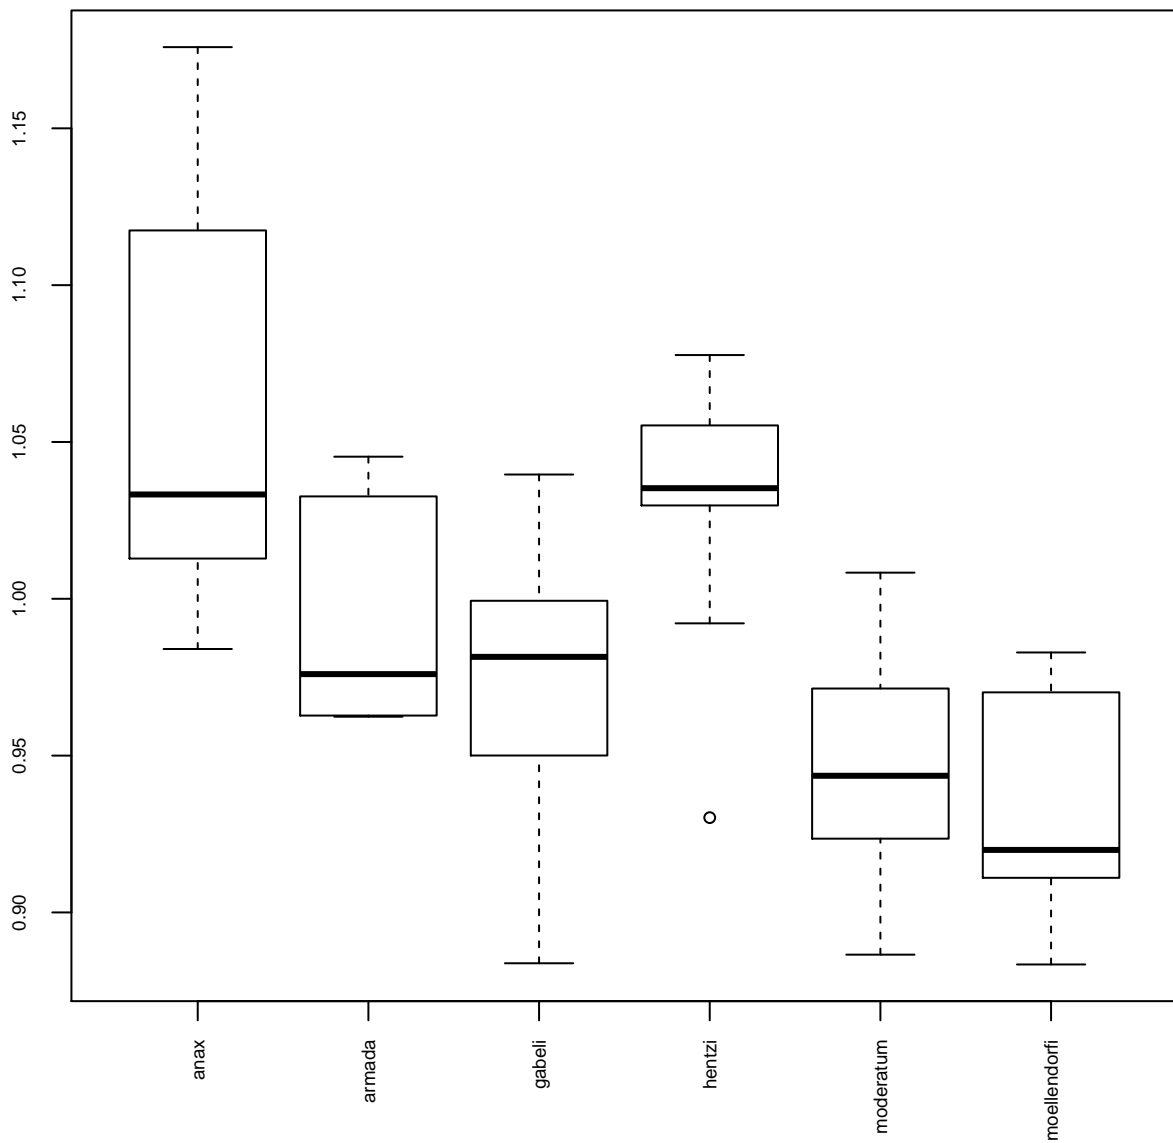

Supplement: Supplementary file 1016

## Carapace Length/Tibia 4 ratio – females

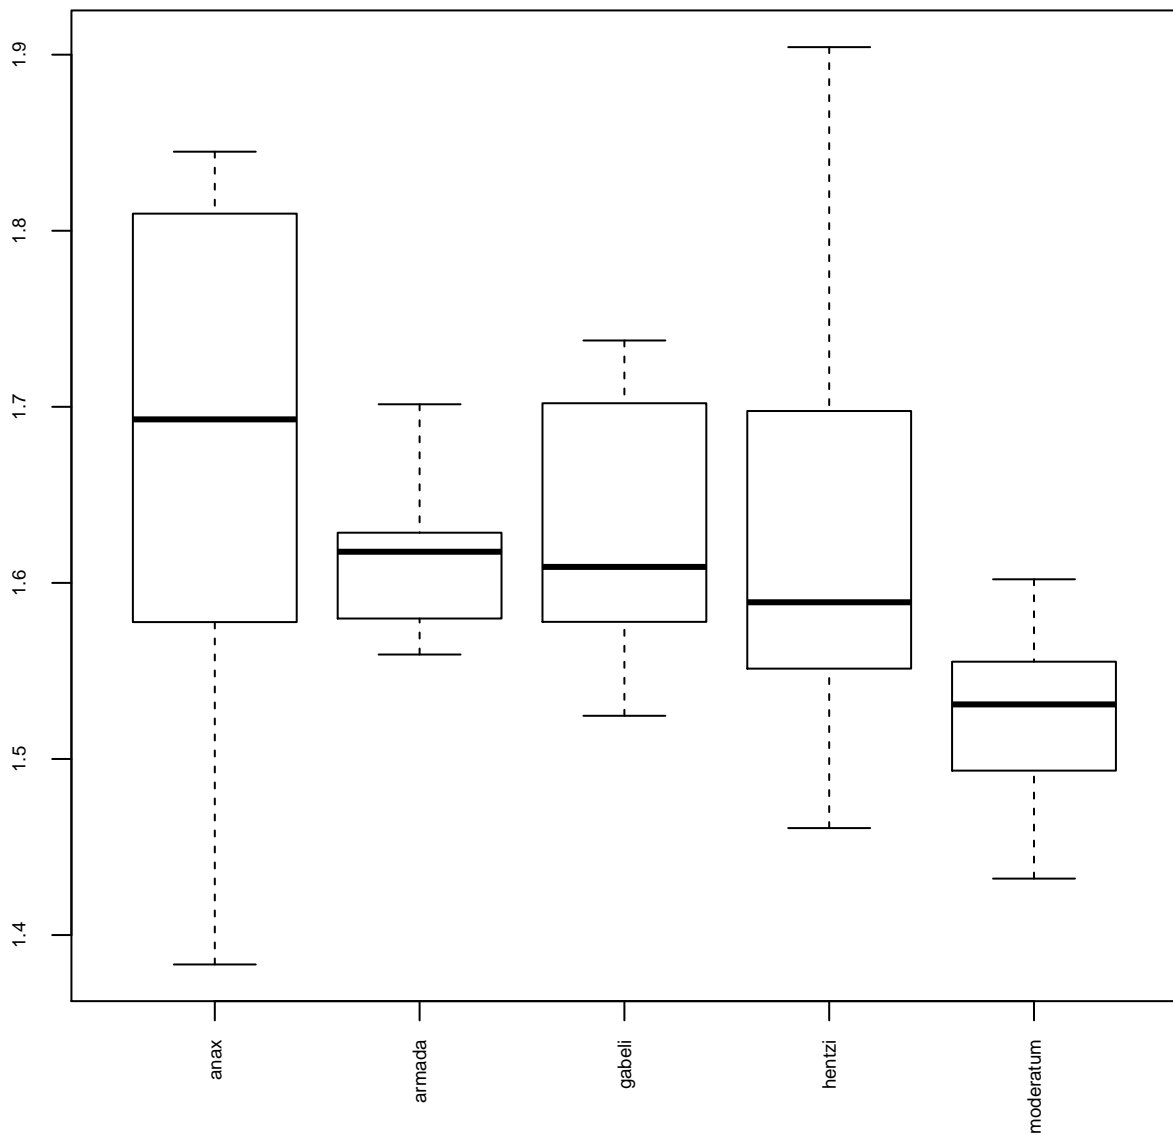

Supplement: Supplementary file 1017

## Metatarsus 1/Tarsus 3 Length ratio – males

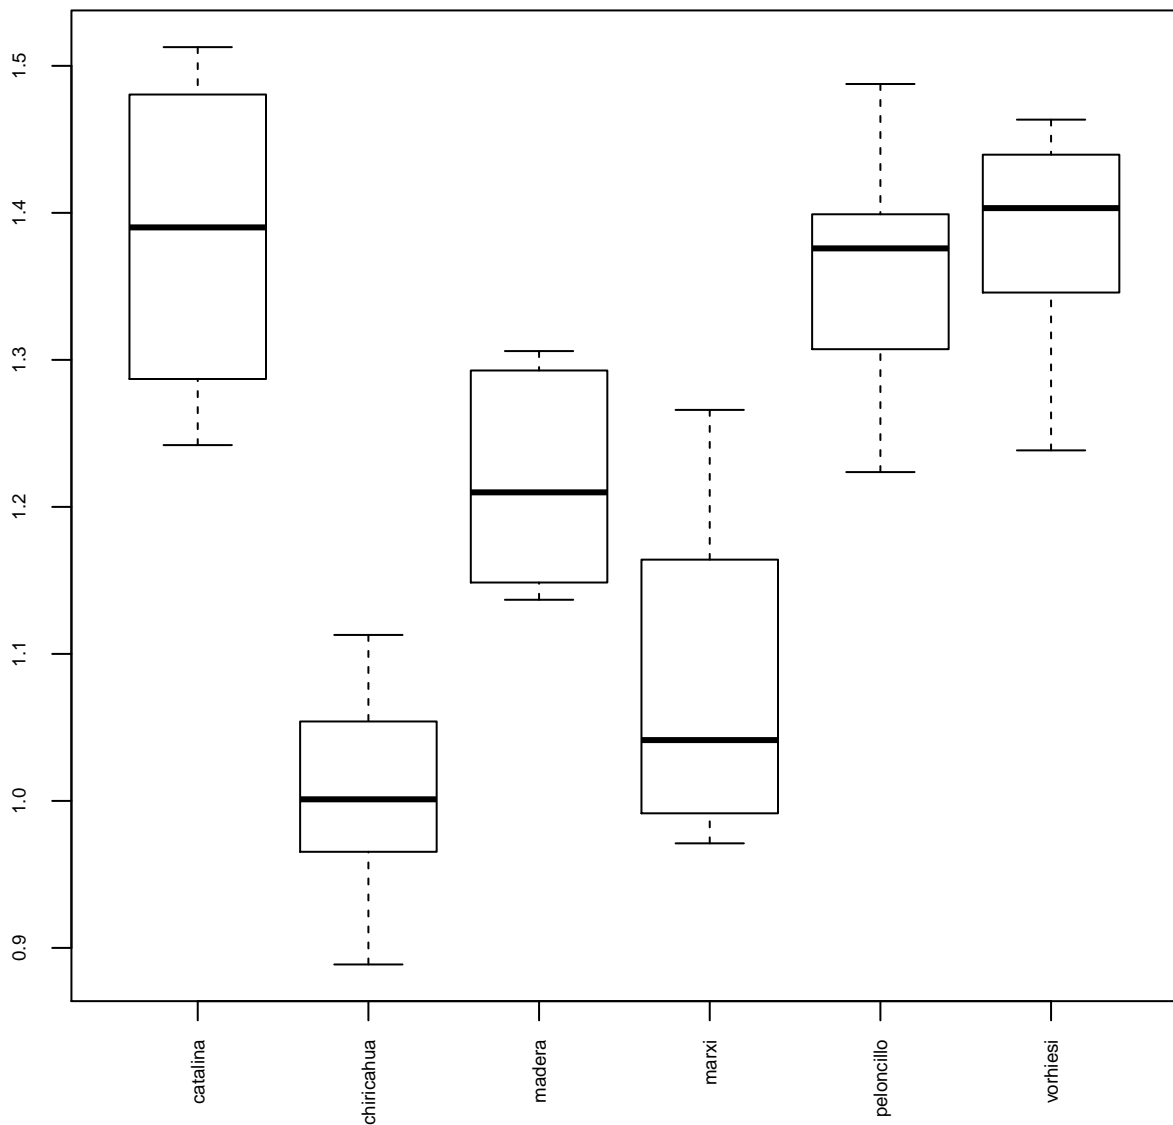

Supplement: Supplementary file 1018

## Patella 1/Patella 4 ratio – males

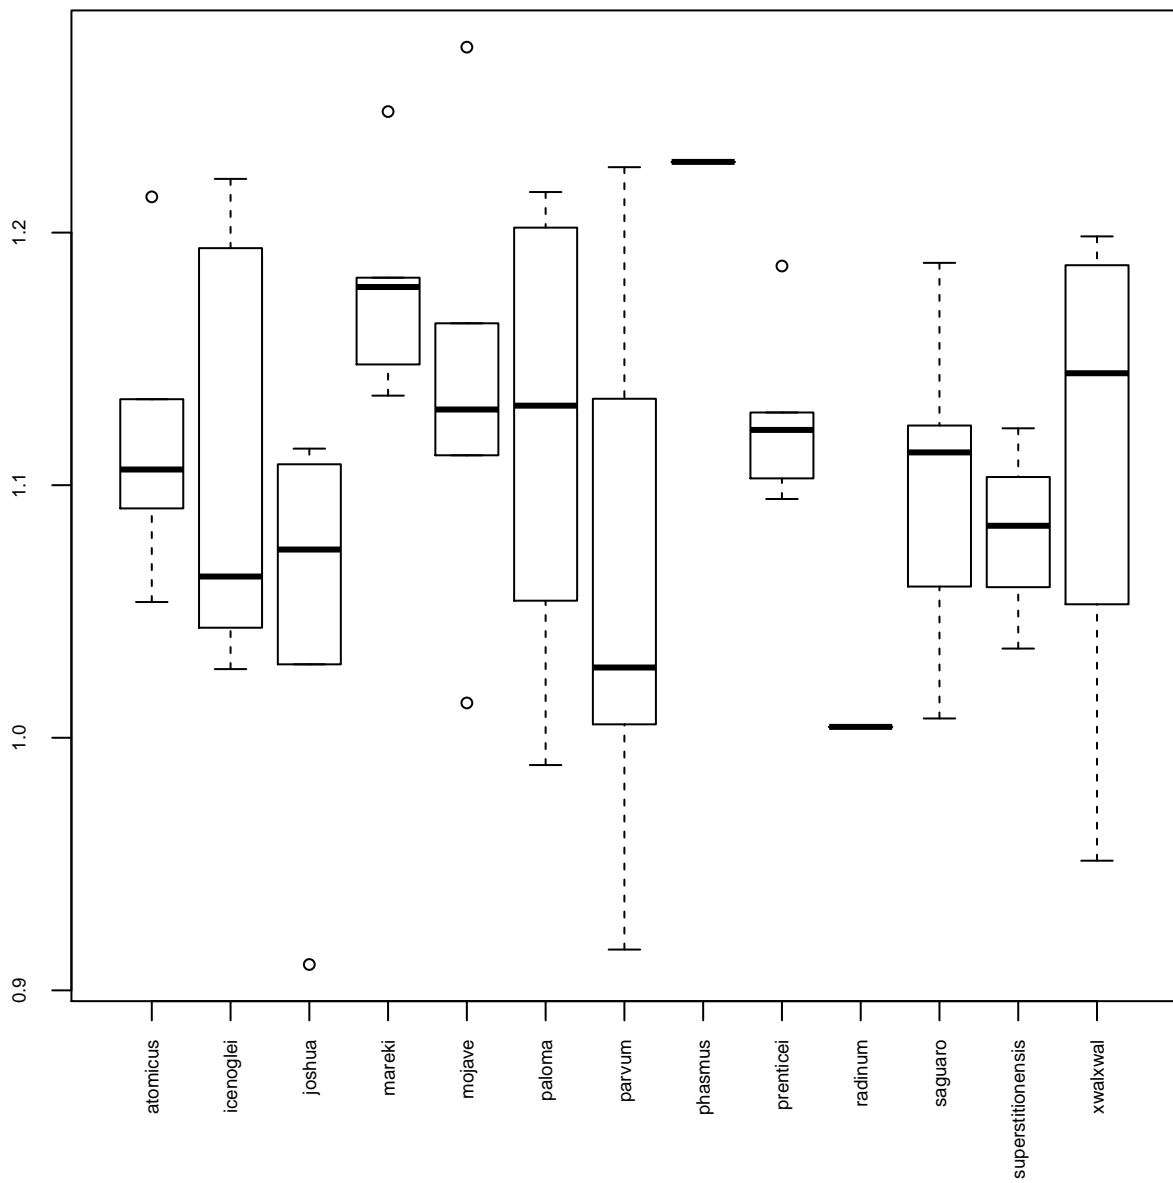

Supplement: Supplementary file 1019

## Femur 3/Tarsus 3 ratio – females

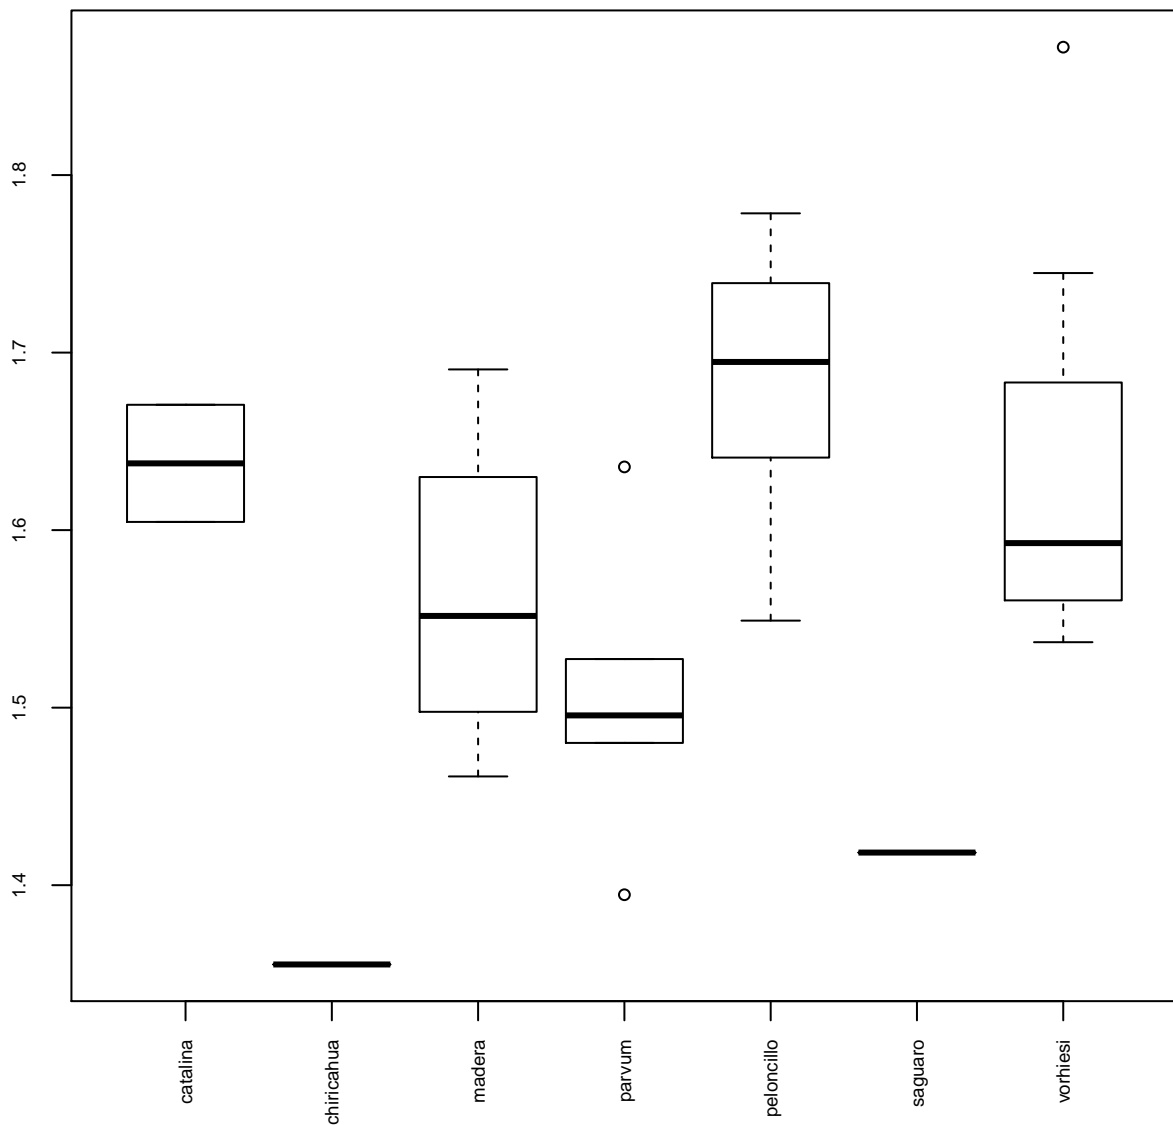

Supplement: Supplementary file 1020

# Leg 4 Length – males

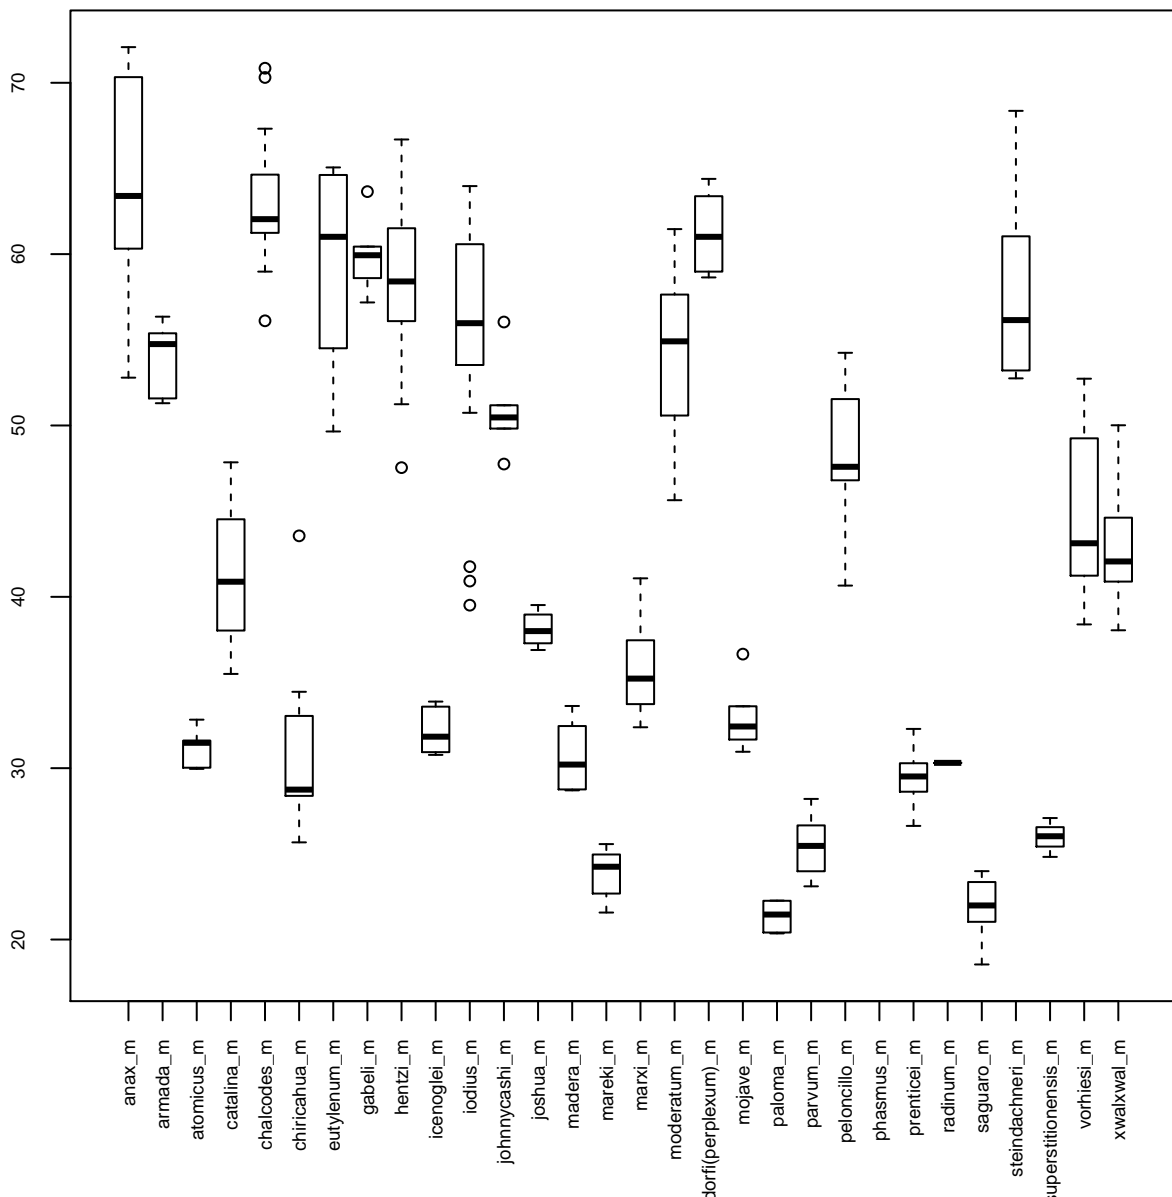

Supplement: Supplementary file 1021

## Femur 3/Tibia 4 Length ratio – males

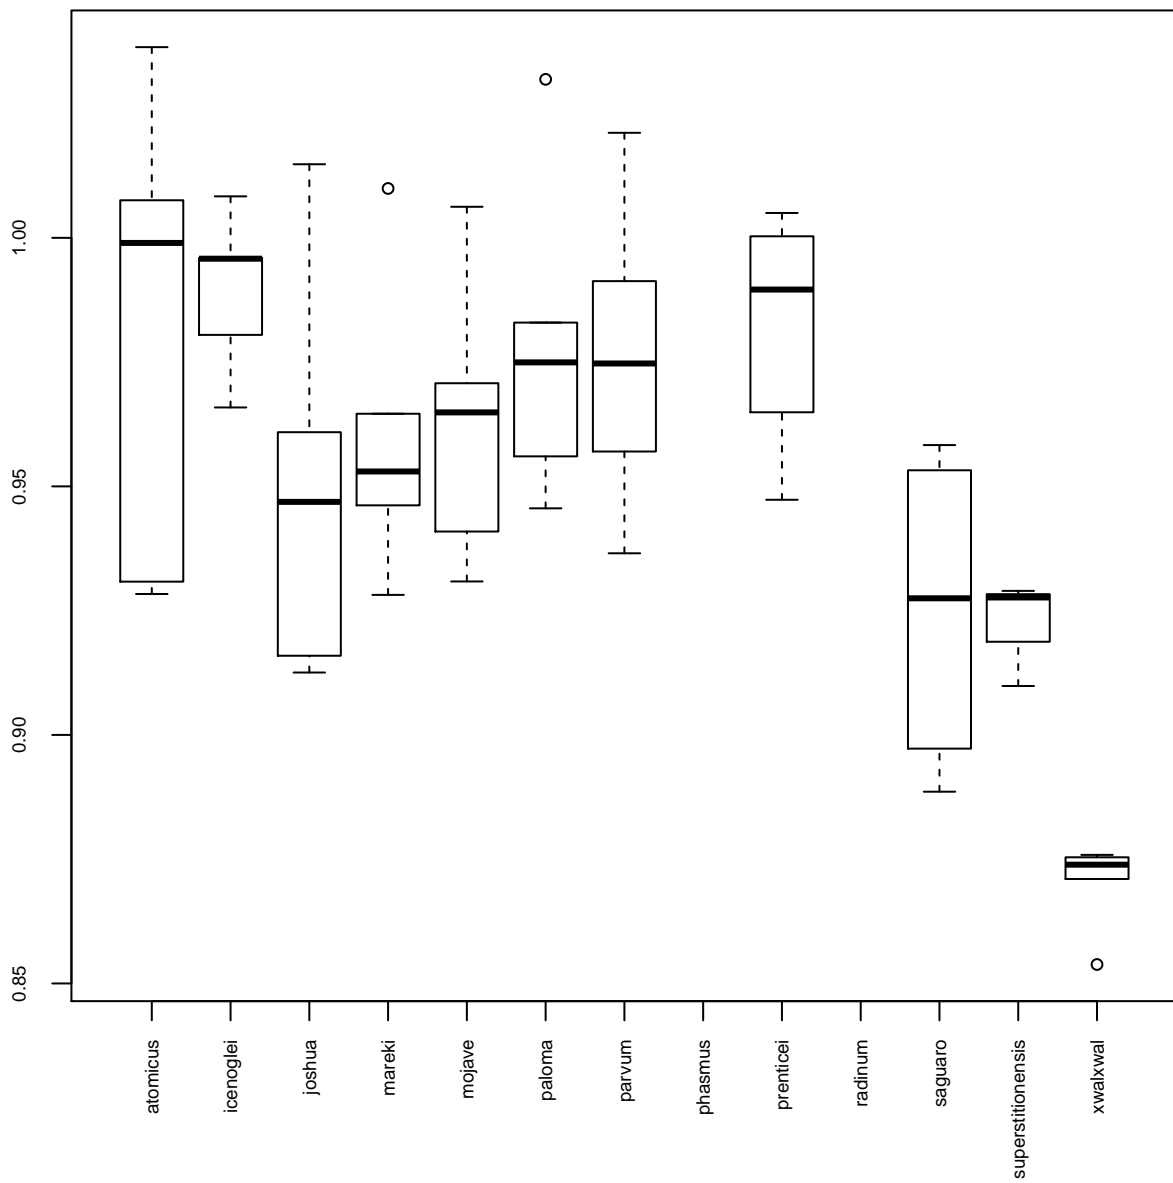

Supplement: Supplementary file 1022

## Femur 3/Metatarsus 4 Length ratio – females

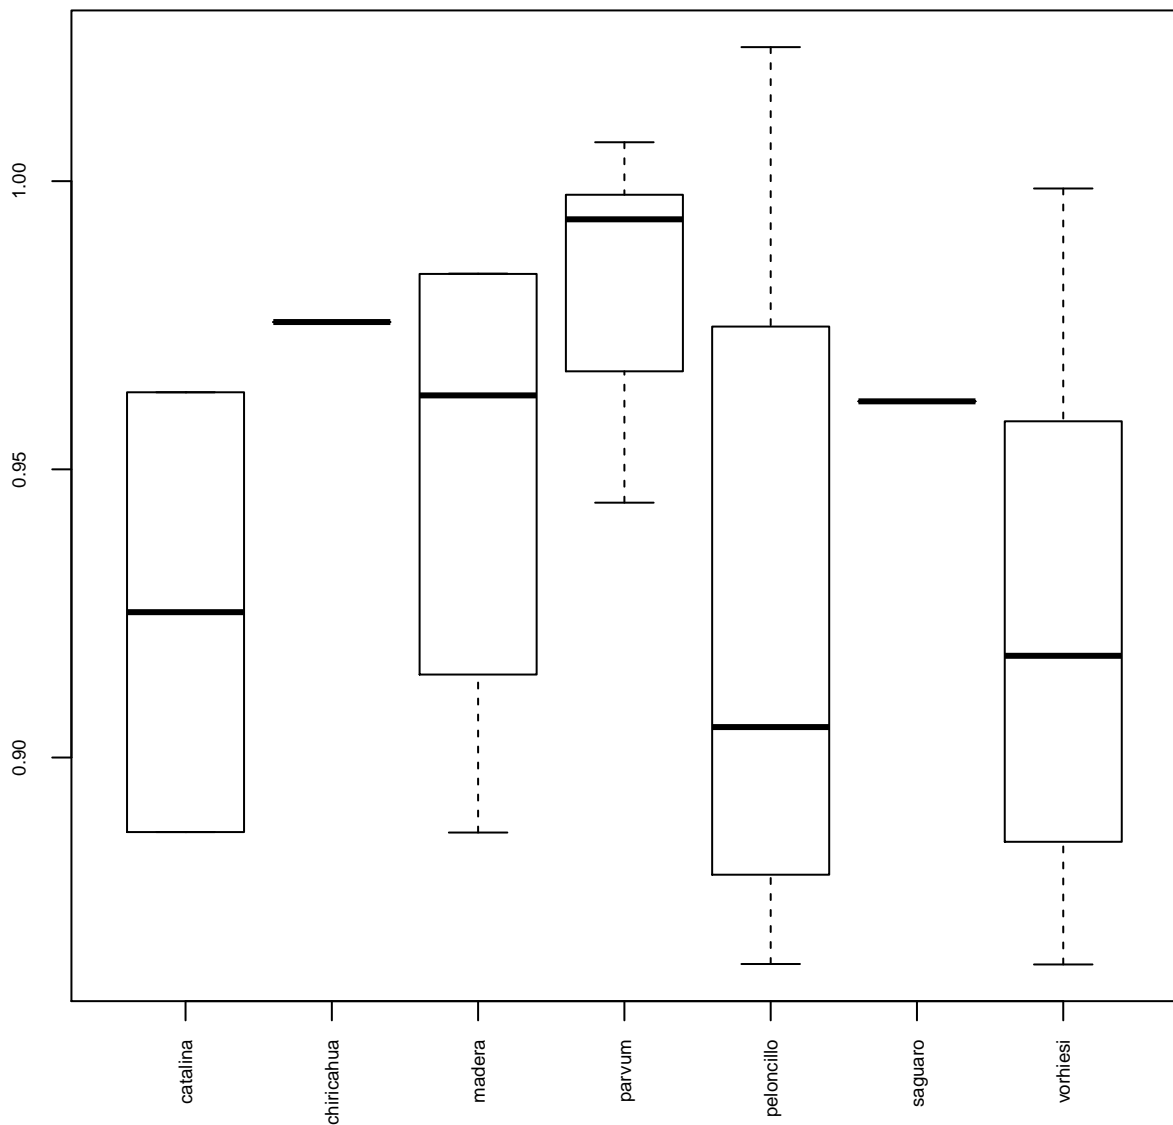

Supplement: Supplementary file 1023

# Patella 3/Tibia 4 Length ratio – males

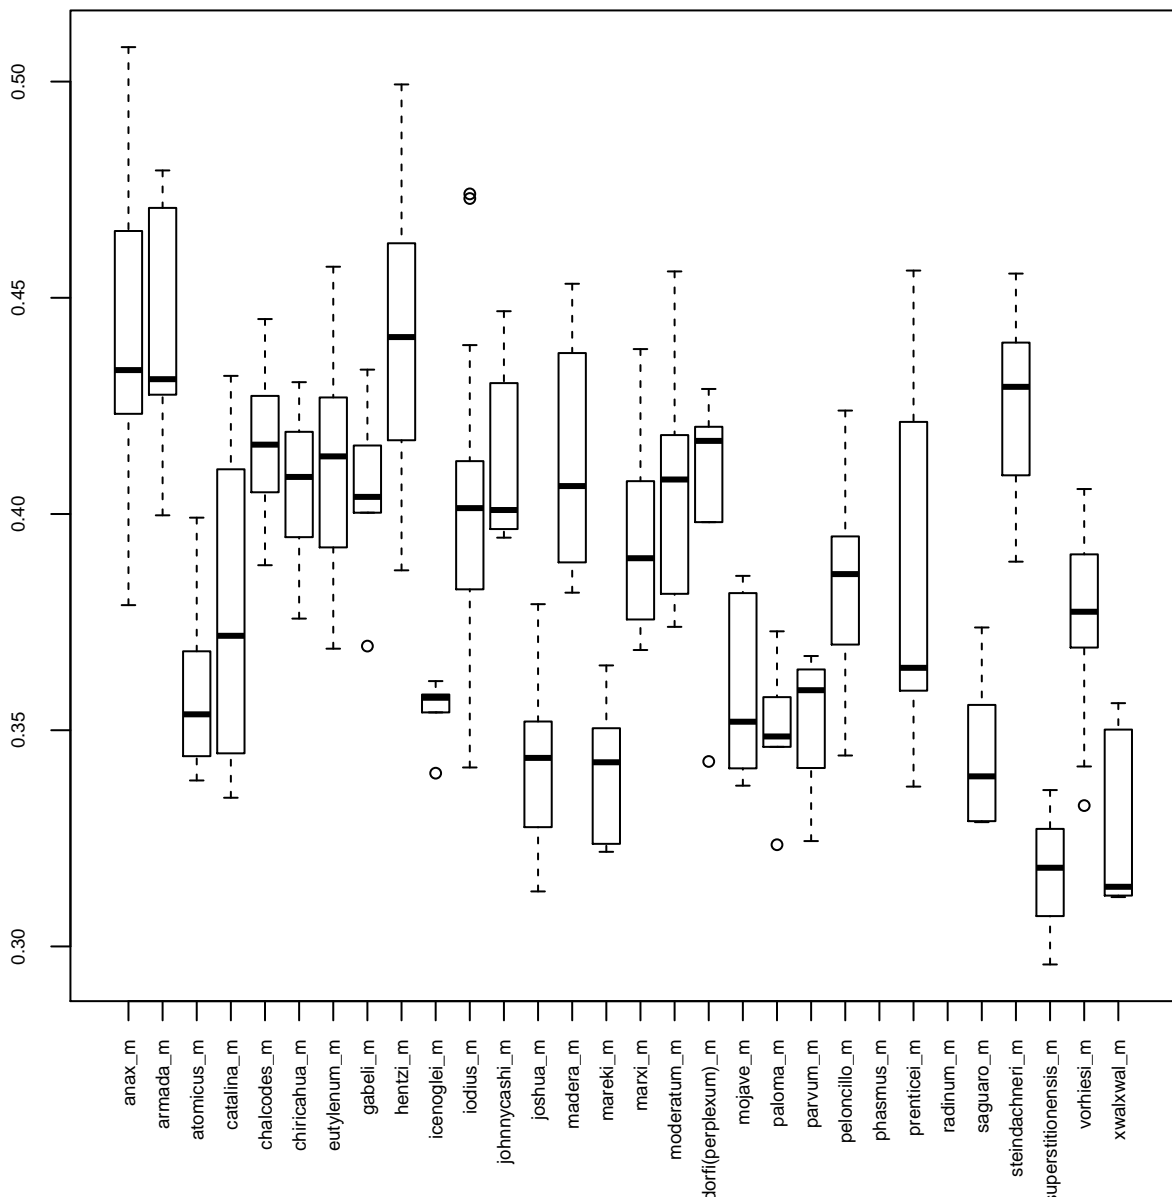

Supplement: Supplementary file 1024

## Leg 3/Leg 4 Length ratio – males

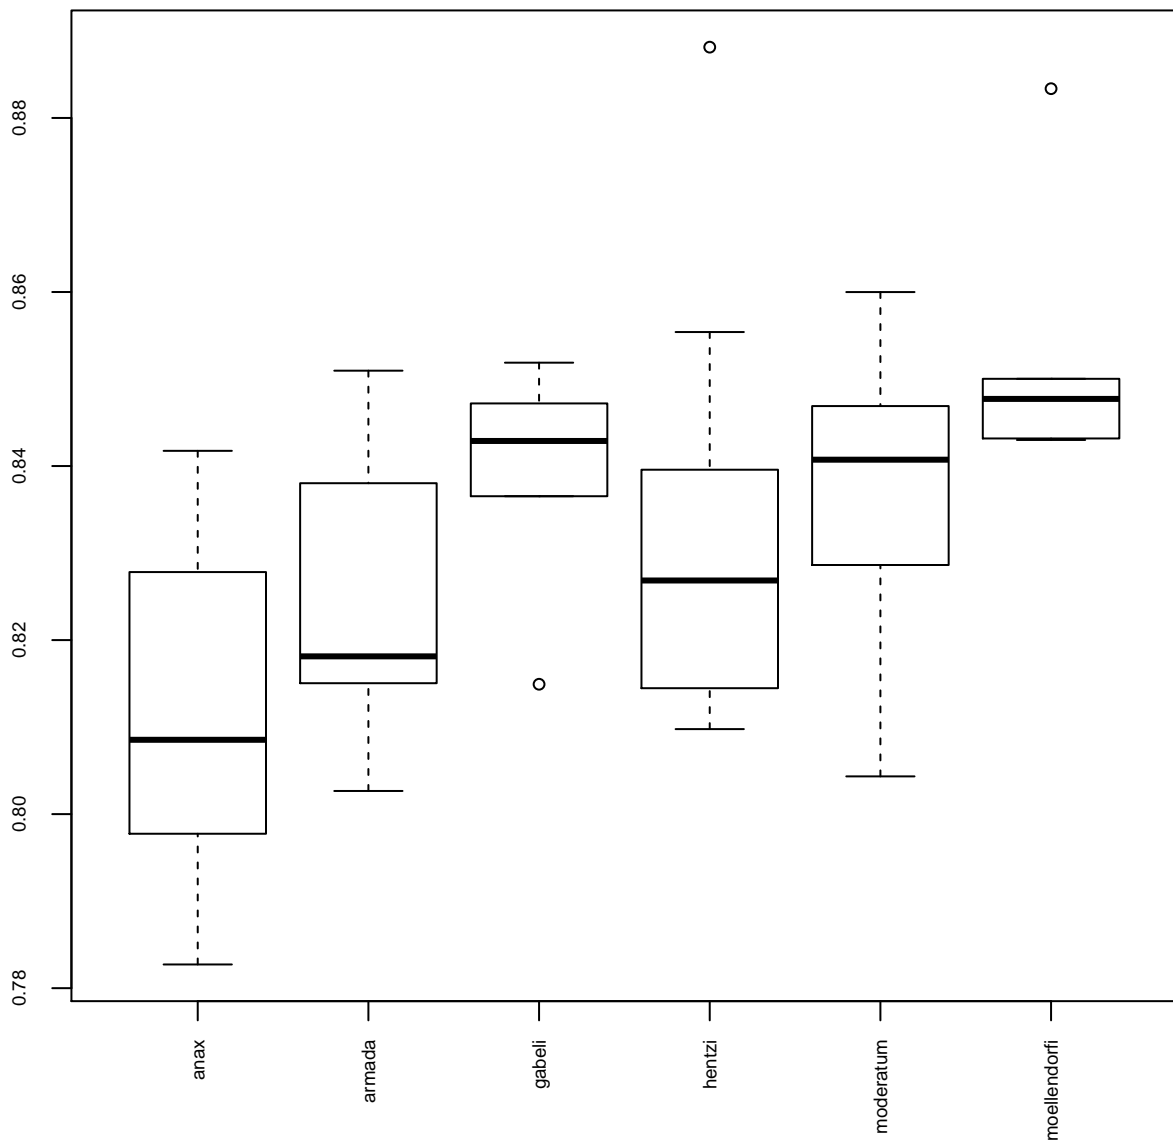

Supplement: Supplementary file 1025

# Metatarsus 3/Tarsus 3 ratio – males

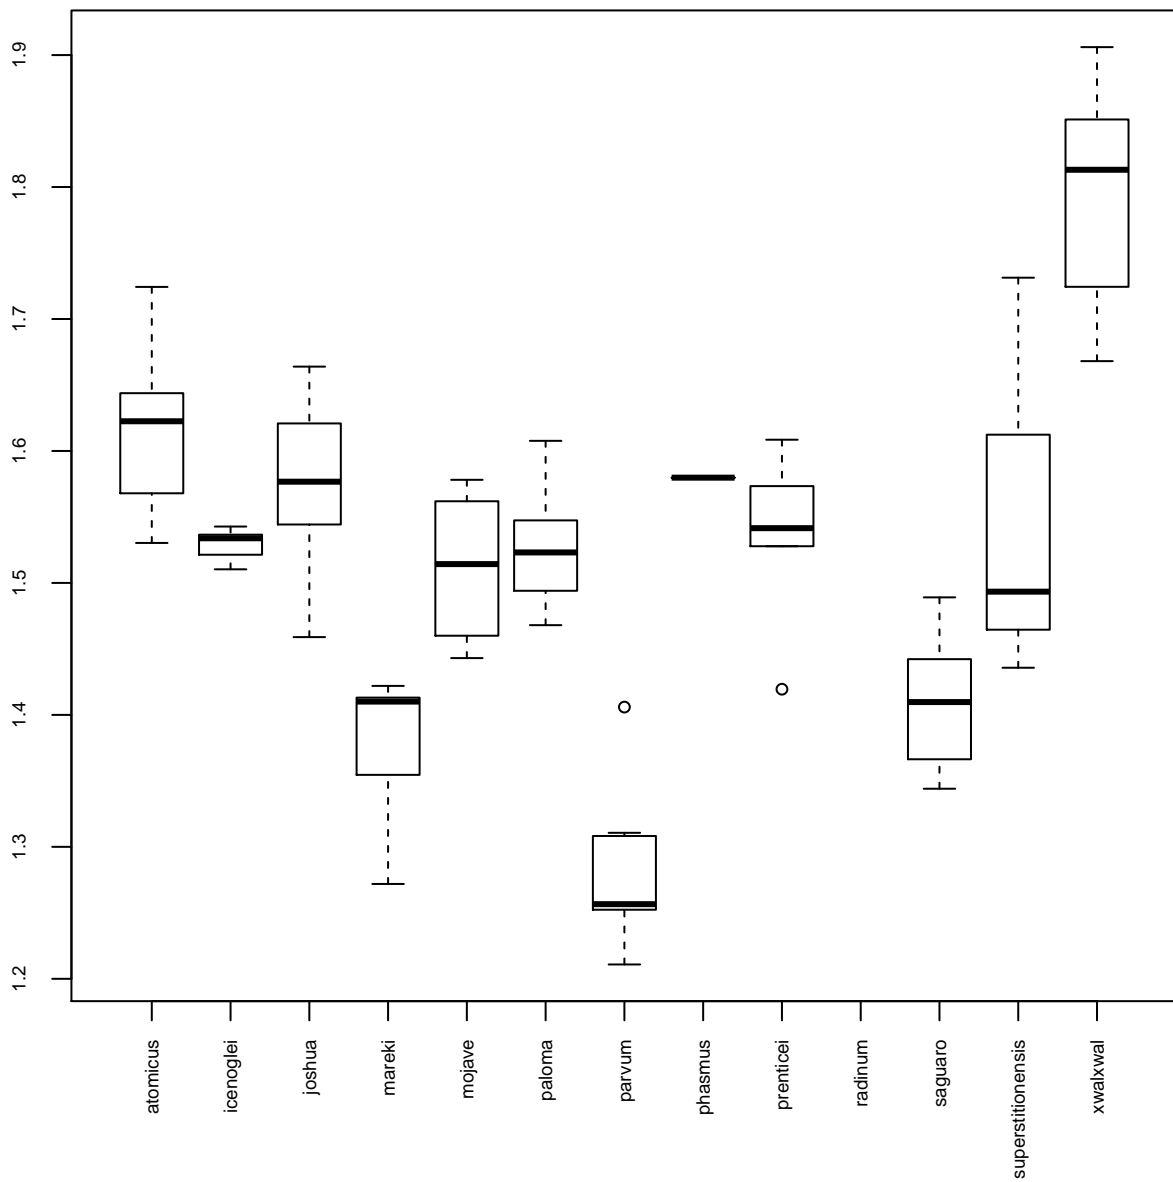

Supplement: Supplementary file 1026

## Metatarsus 1/Femur 3 Length ratio – females

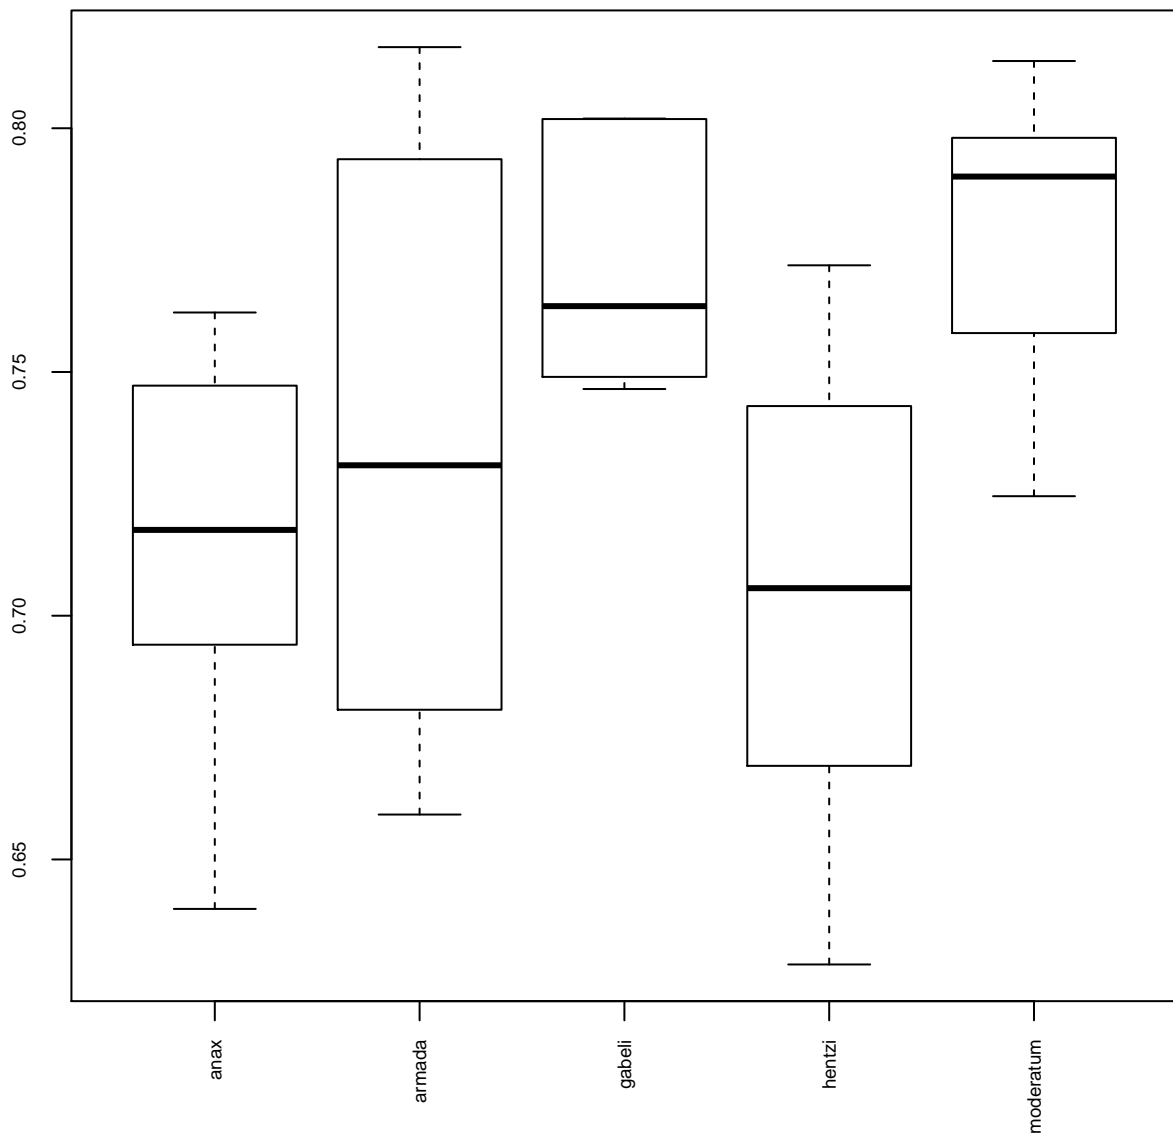

Supplement: Supplementary file 1027

# Palpal Tibia Length/Width ratio – males

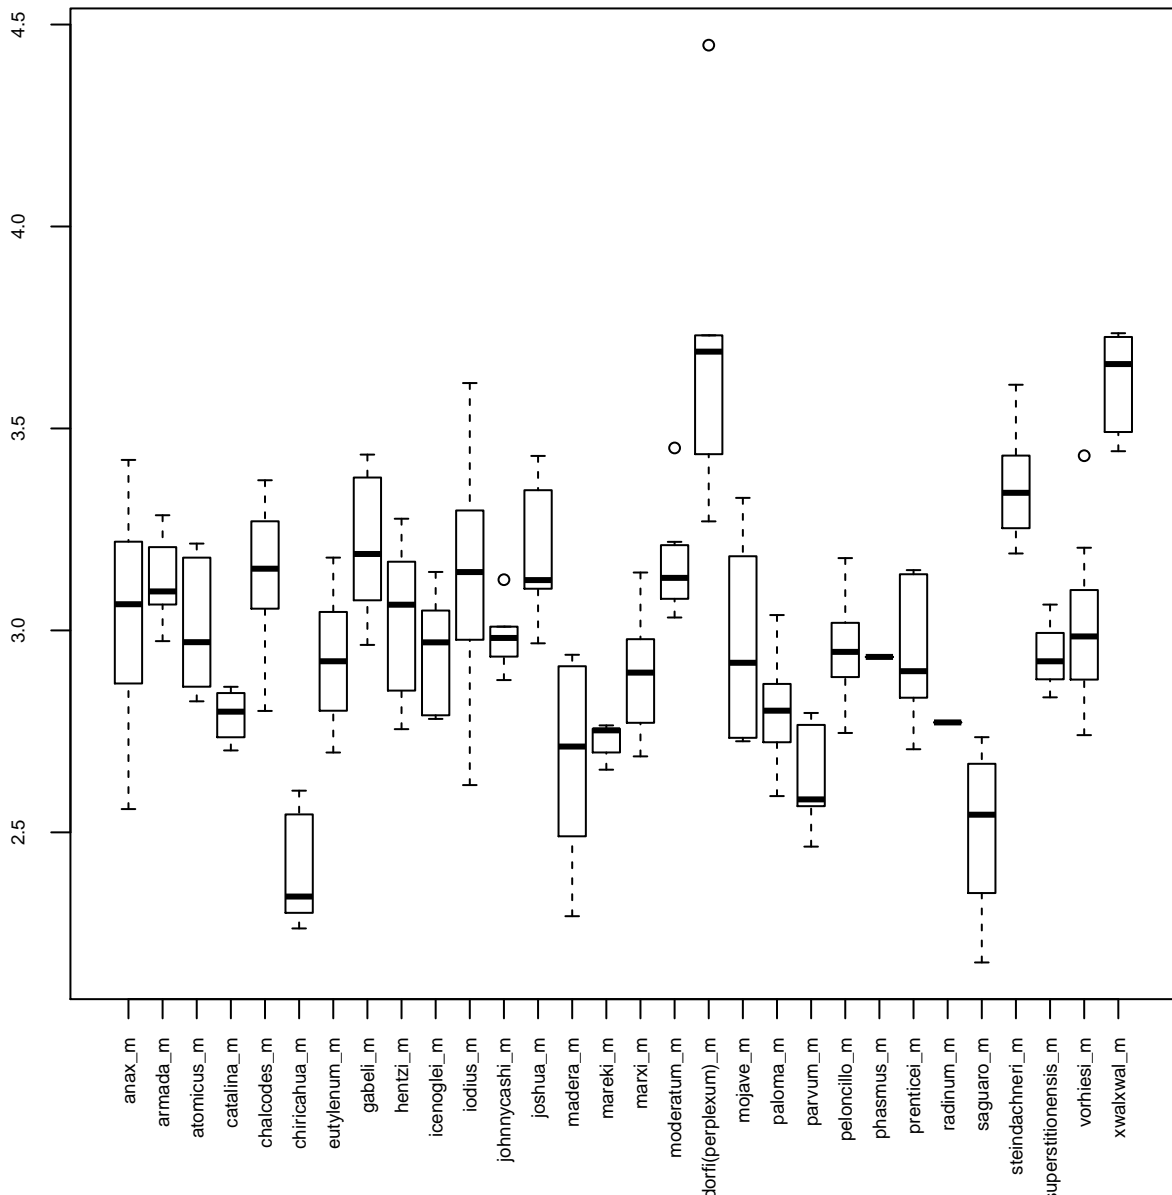

Supplement: Supplementary file 1028

## Patella 1/Femur 3 Length ratio – males

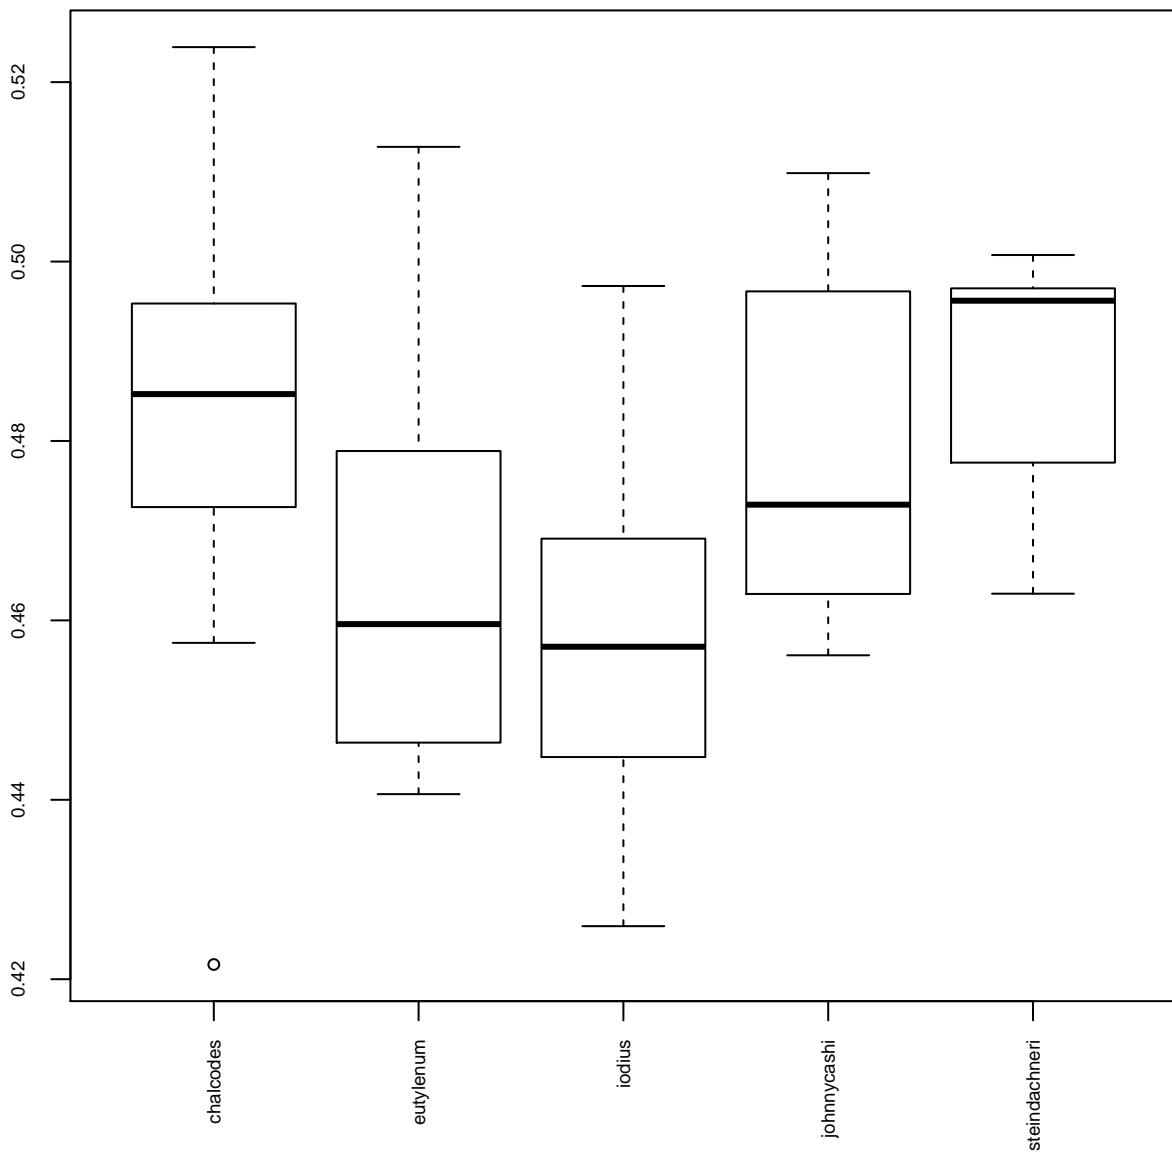

Supplement: Supplementary file 1029

# Tibia 1/Tarsus 1 ratio – males

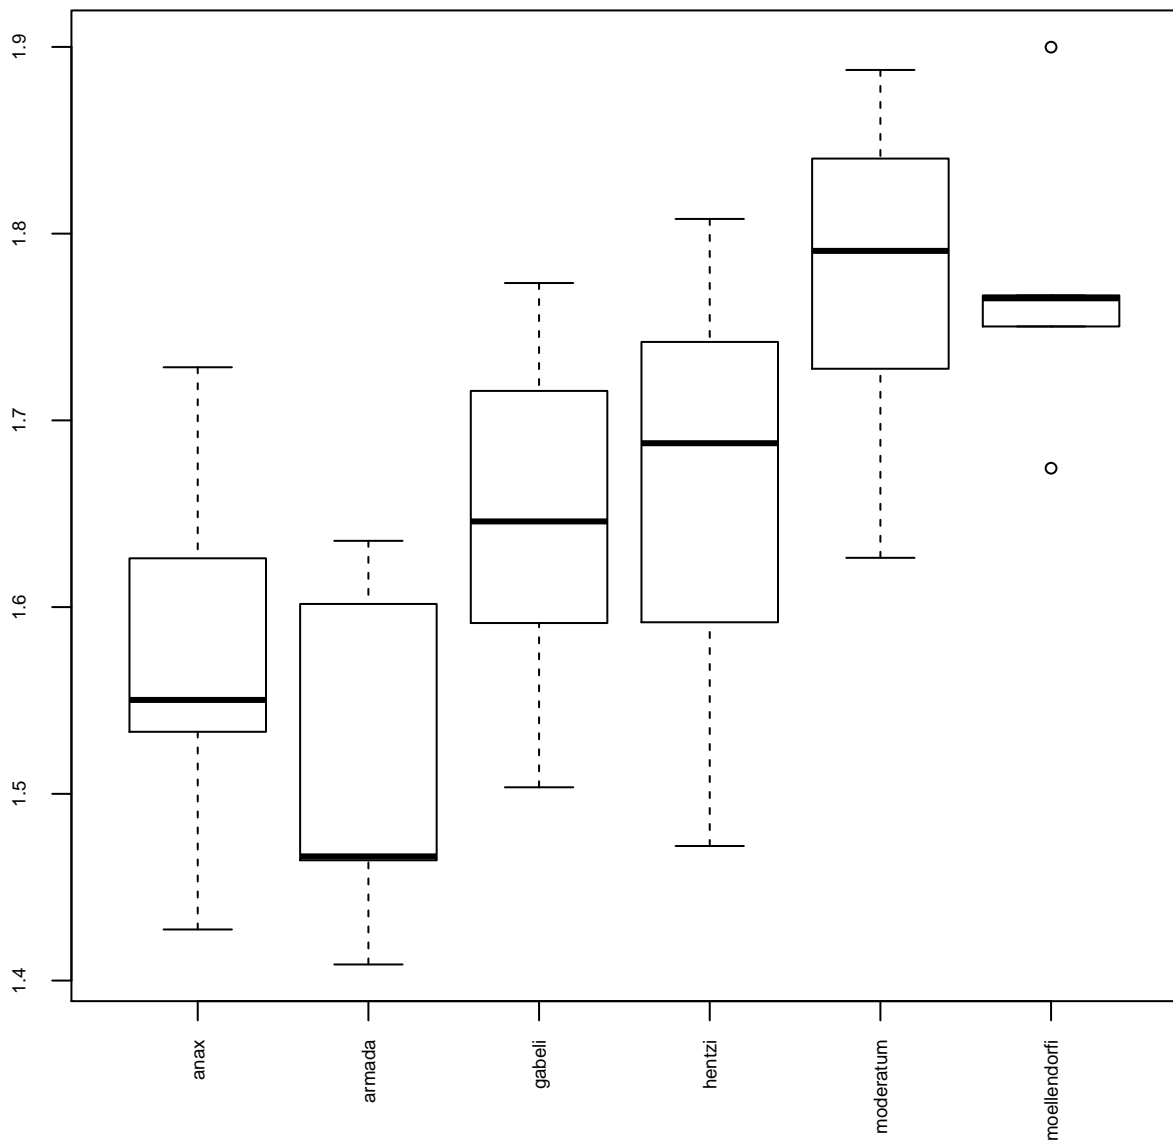

Supplement: Supplementary file 1030

## Metatarsus 3/Tarsus 4 Length ratio – males

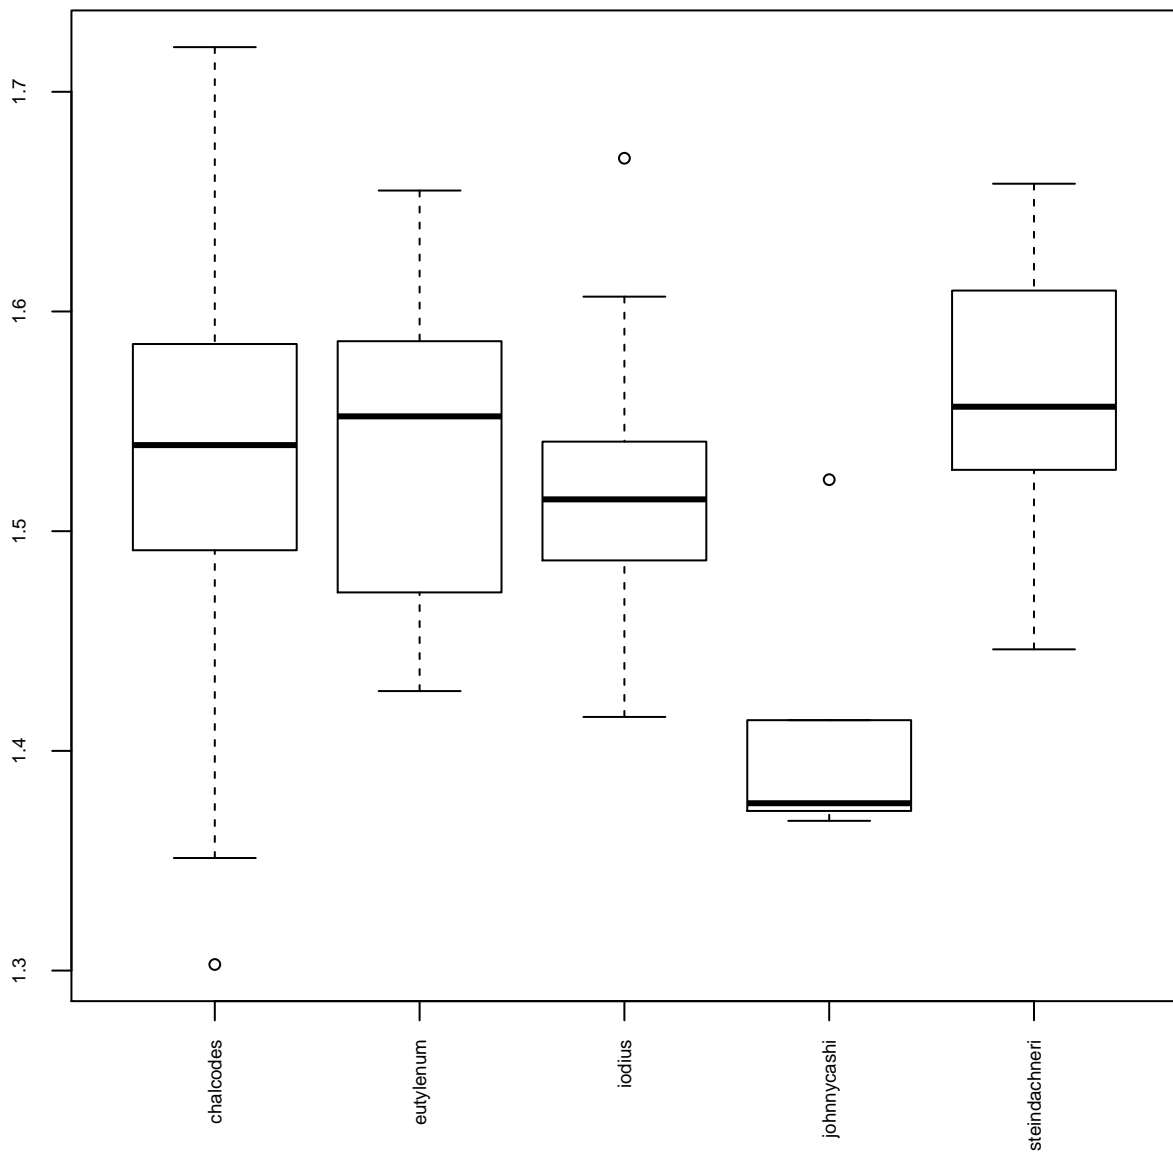

Supplement: Supplementary file 1031

# Patella 3/Metatarsus 4 Length ratio – females

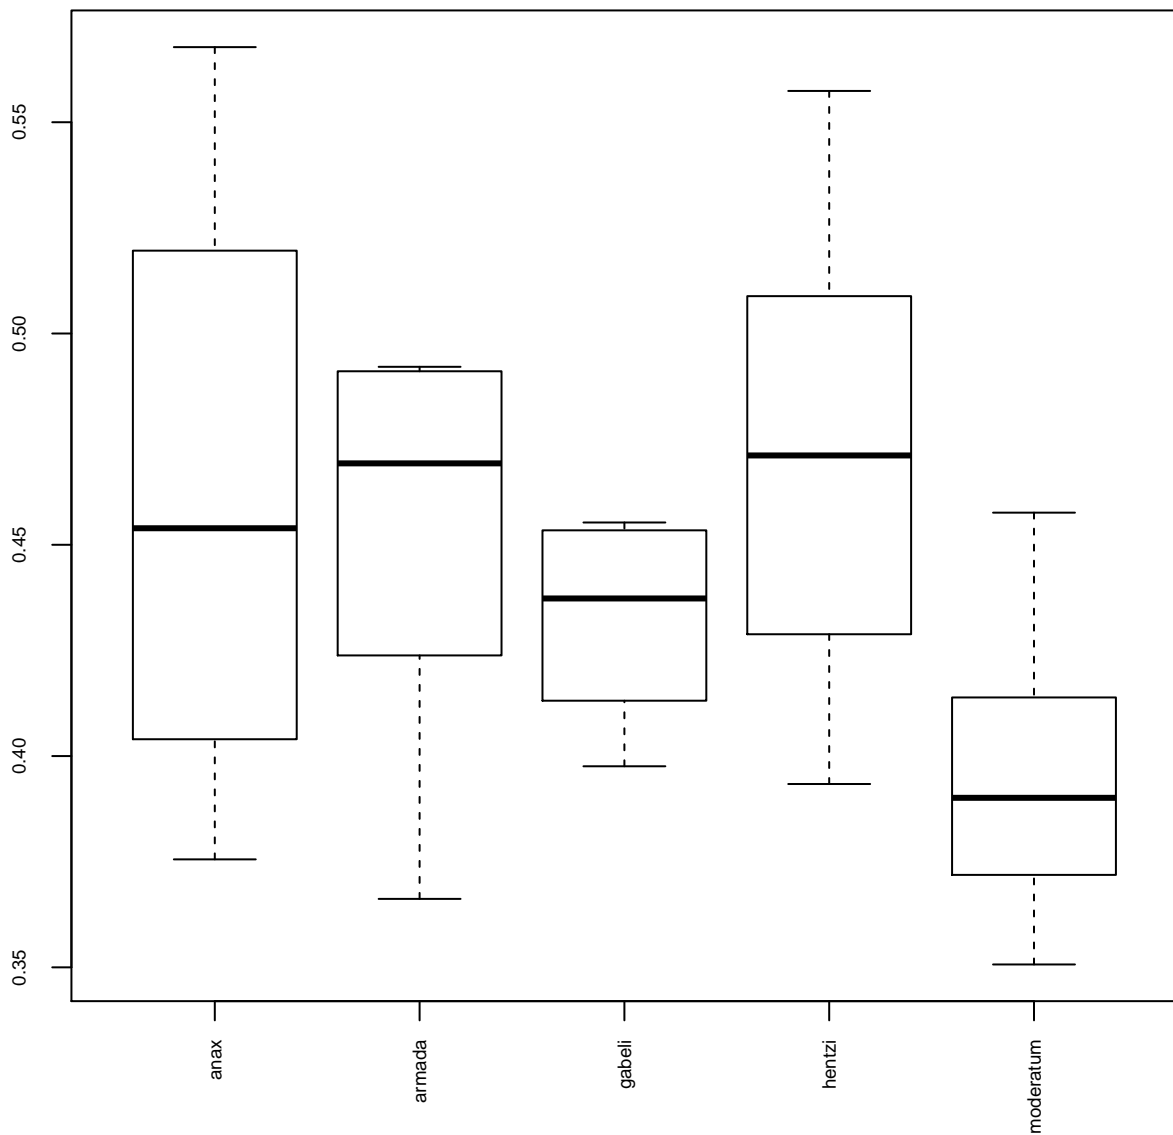

Supplement: Supplementary file 1032

# Femur 1/Tibia 4 ratio – males

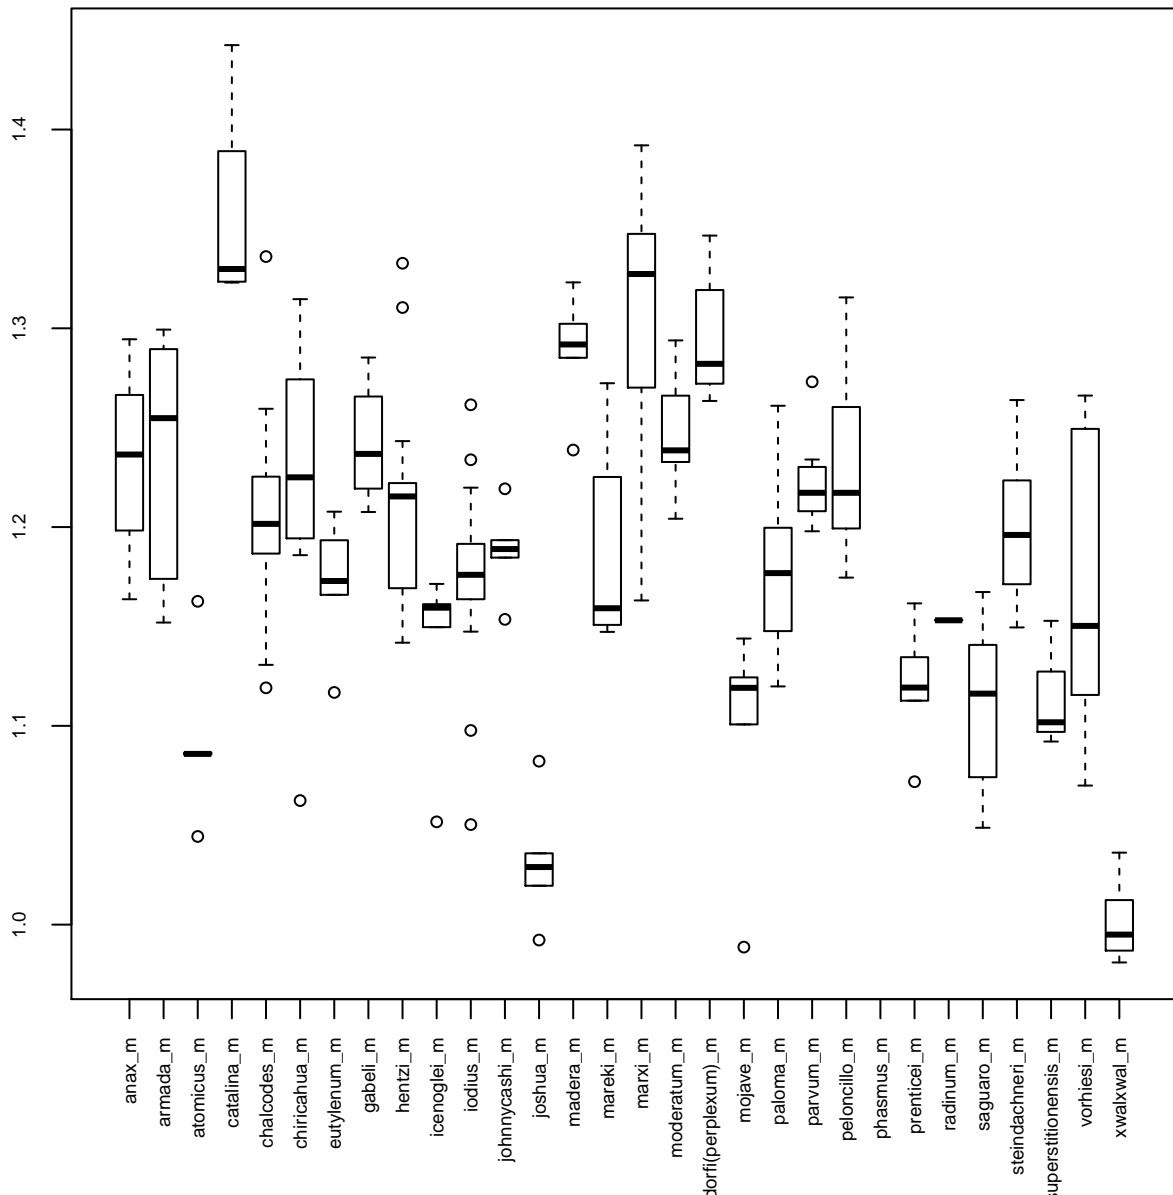

Supplement: Supplementary file 1033

## Palpal Tibia/Tibia 1 Length ratio – males

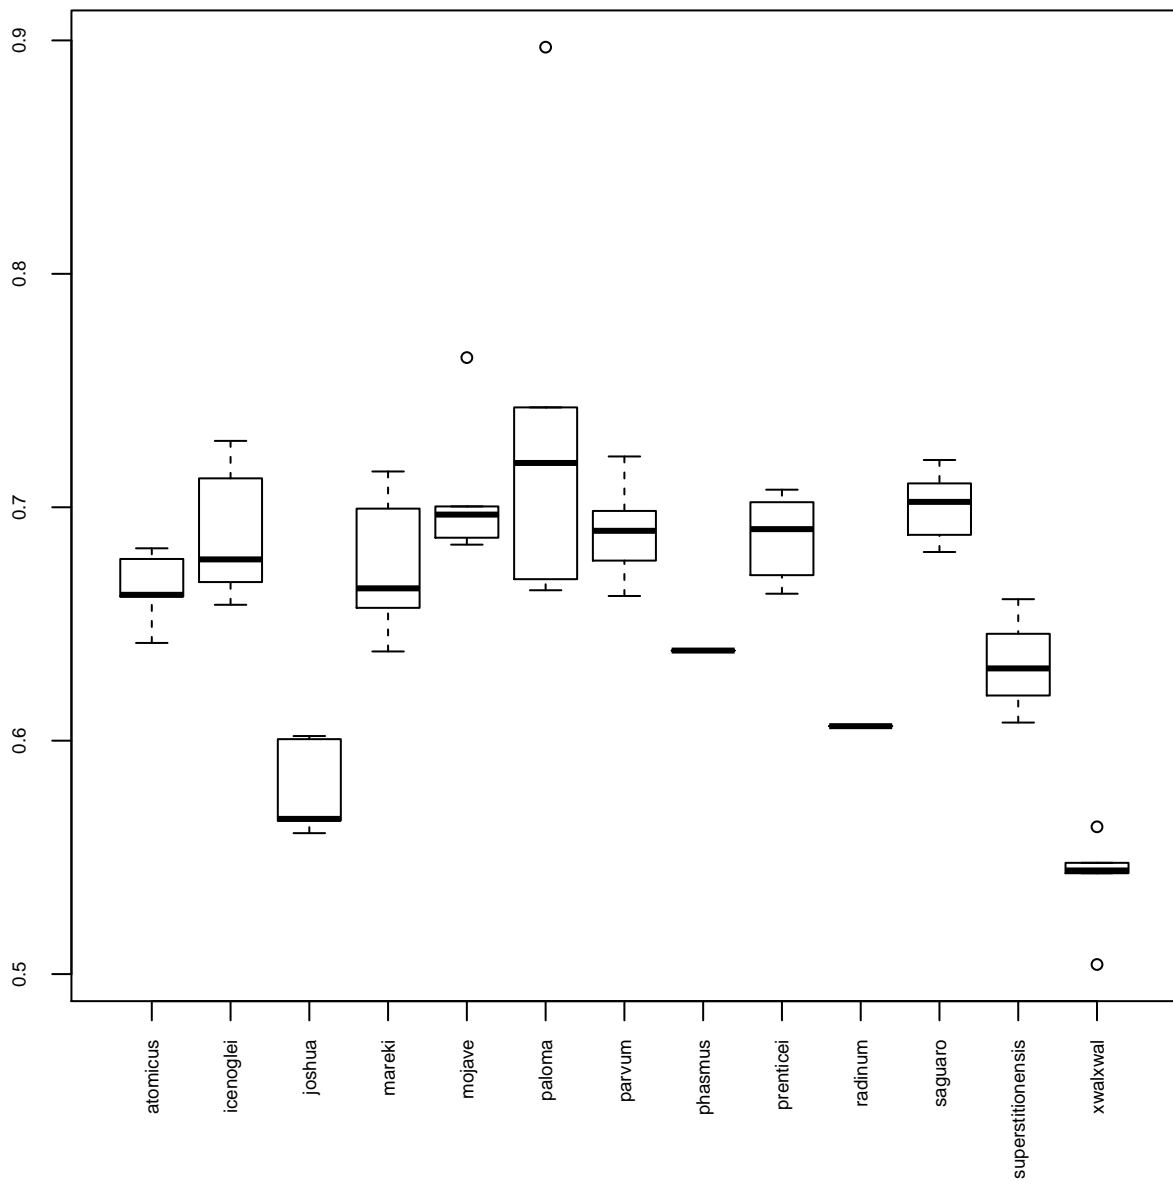

Supplement: Supplementary file 1034

## Tibia 1/Tarsus 4 Length ratio – males

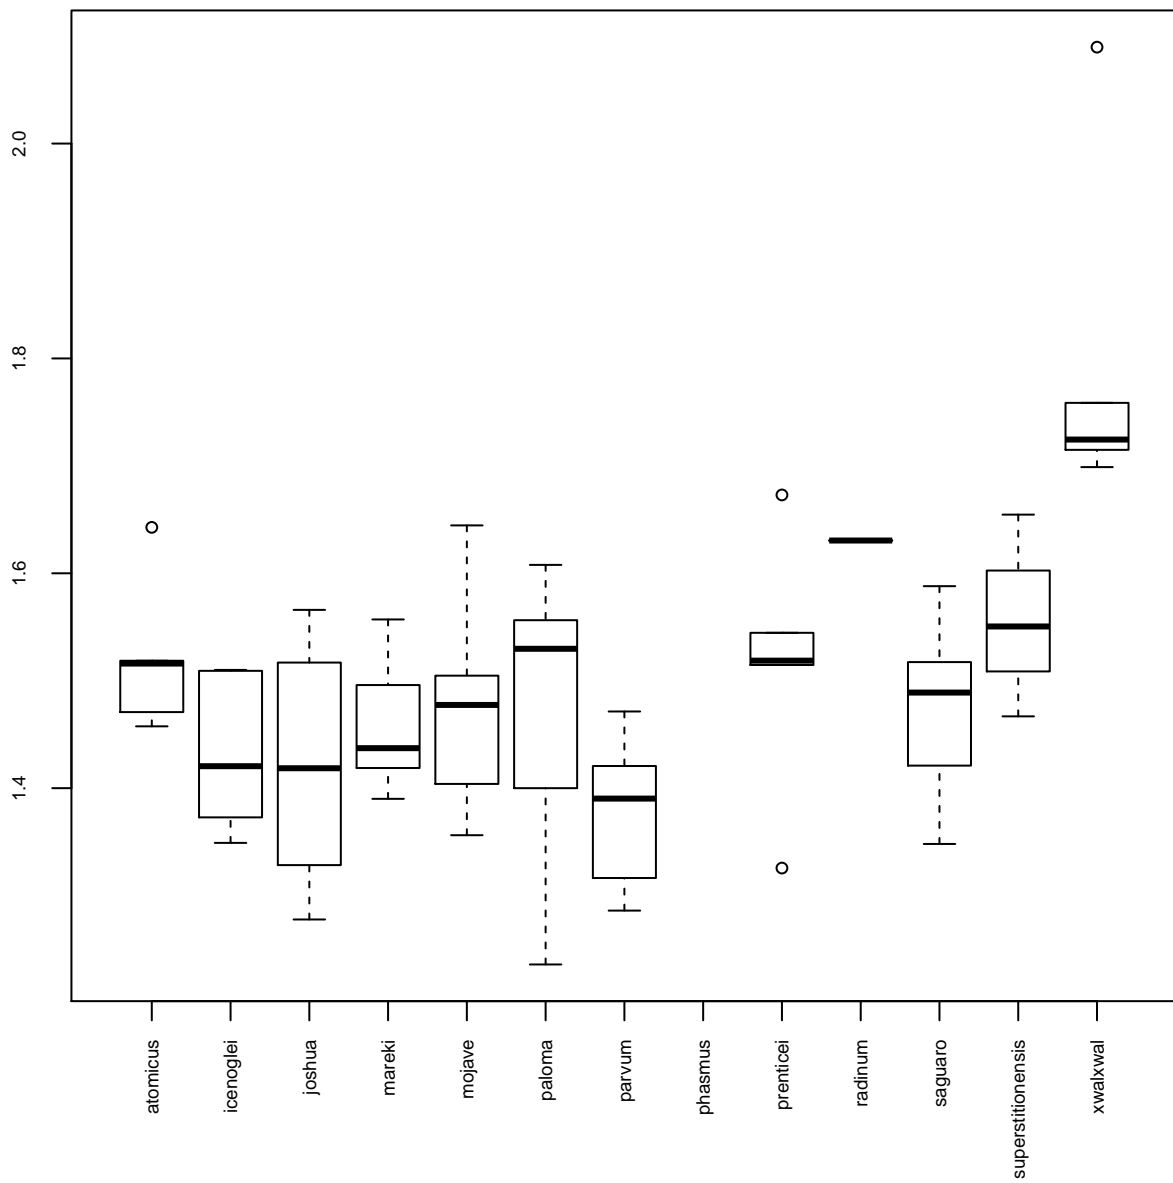

Supplement: Supplementary file 1035

## Leg 3 Scopulation ratio – females

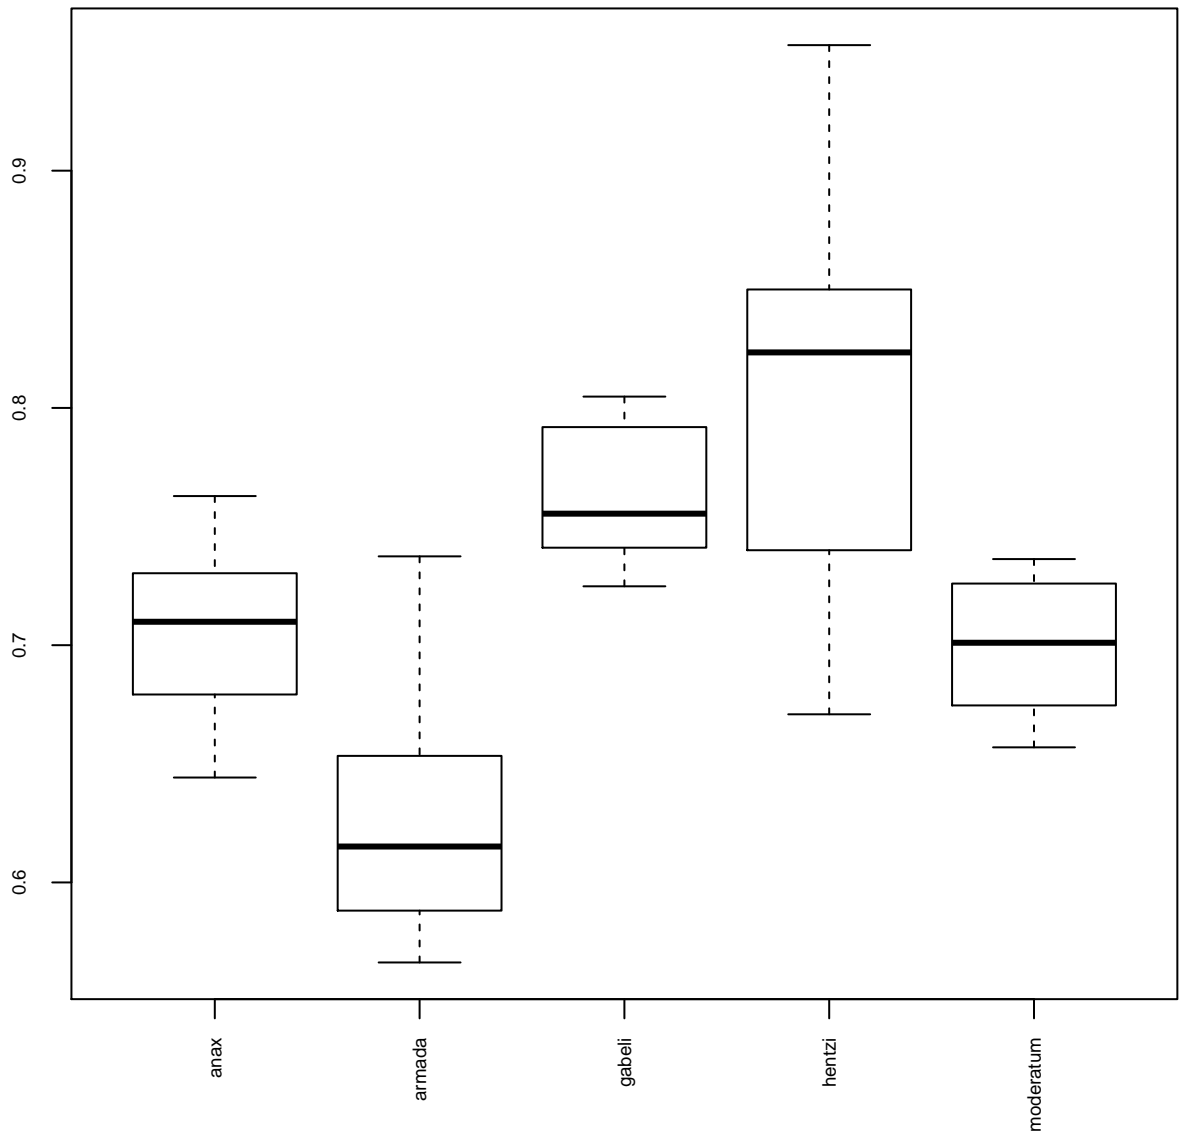

Supplement: Supplementary file 1036

## Metatarsus 3/Tibia 4 Length ratio – females

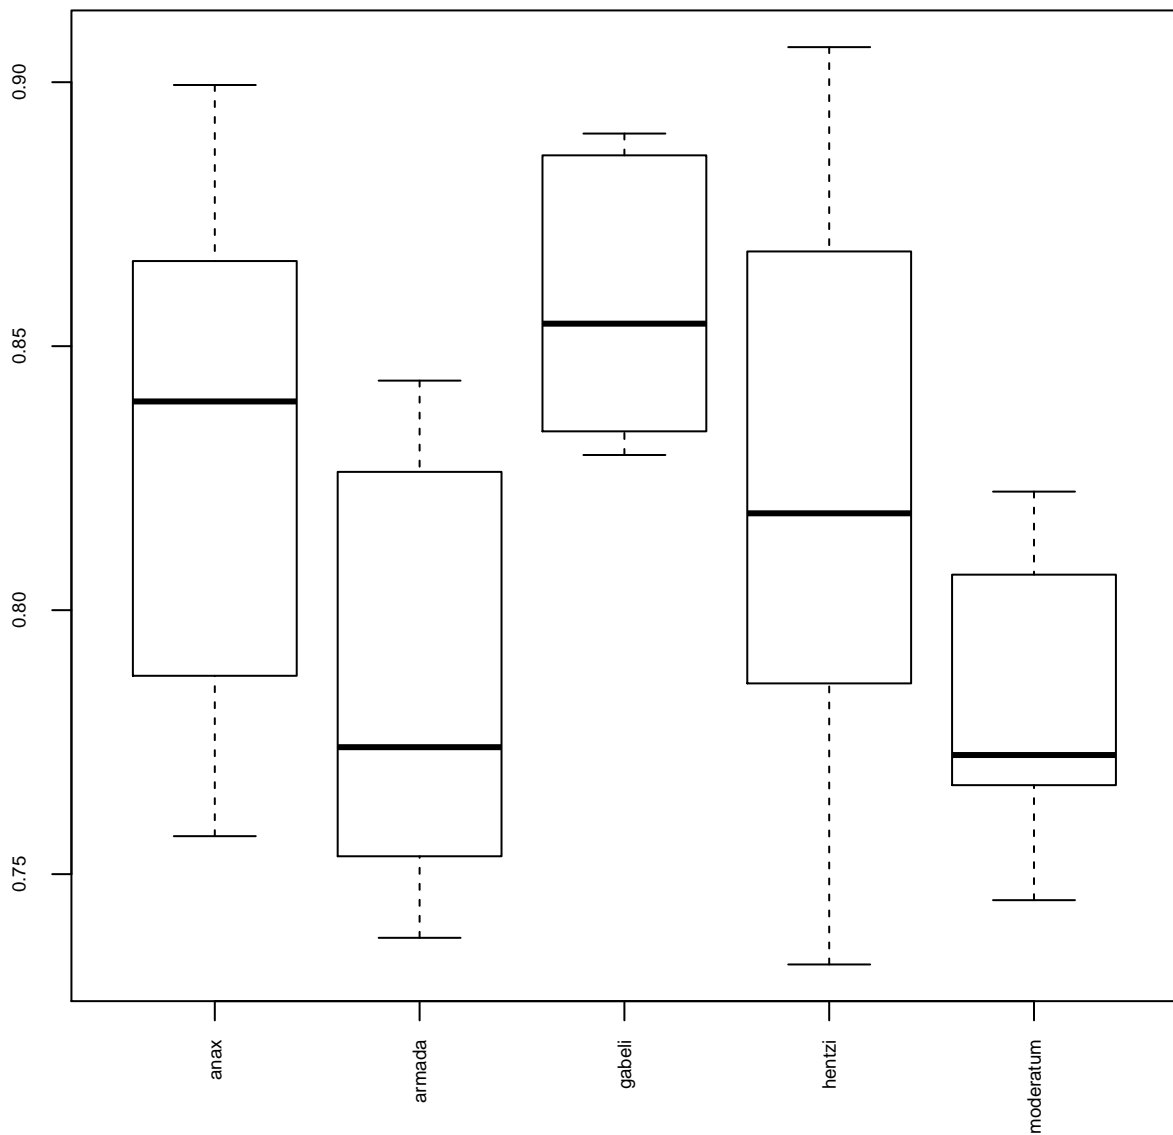

Supplement: Supplementary file 1037

## Patella 1/Tarsus 3 Length ratio – males

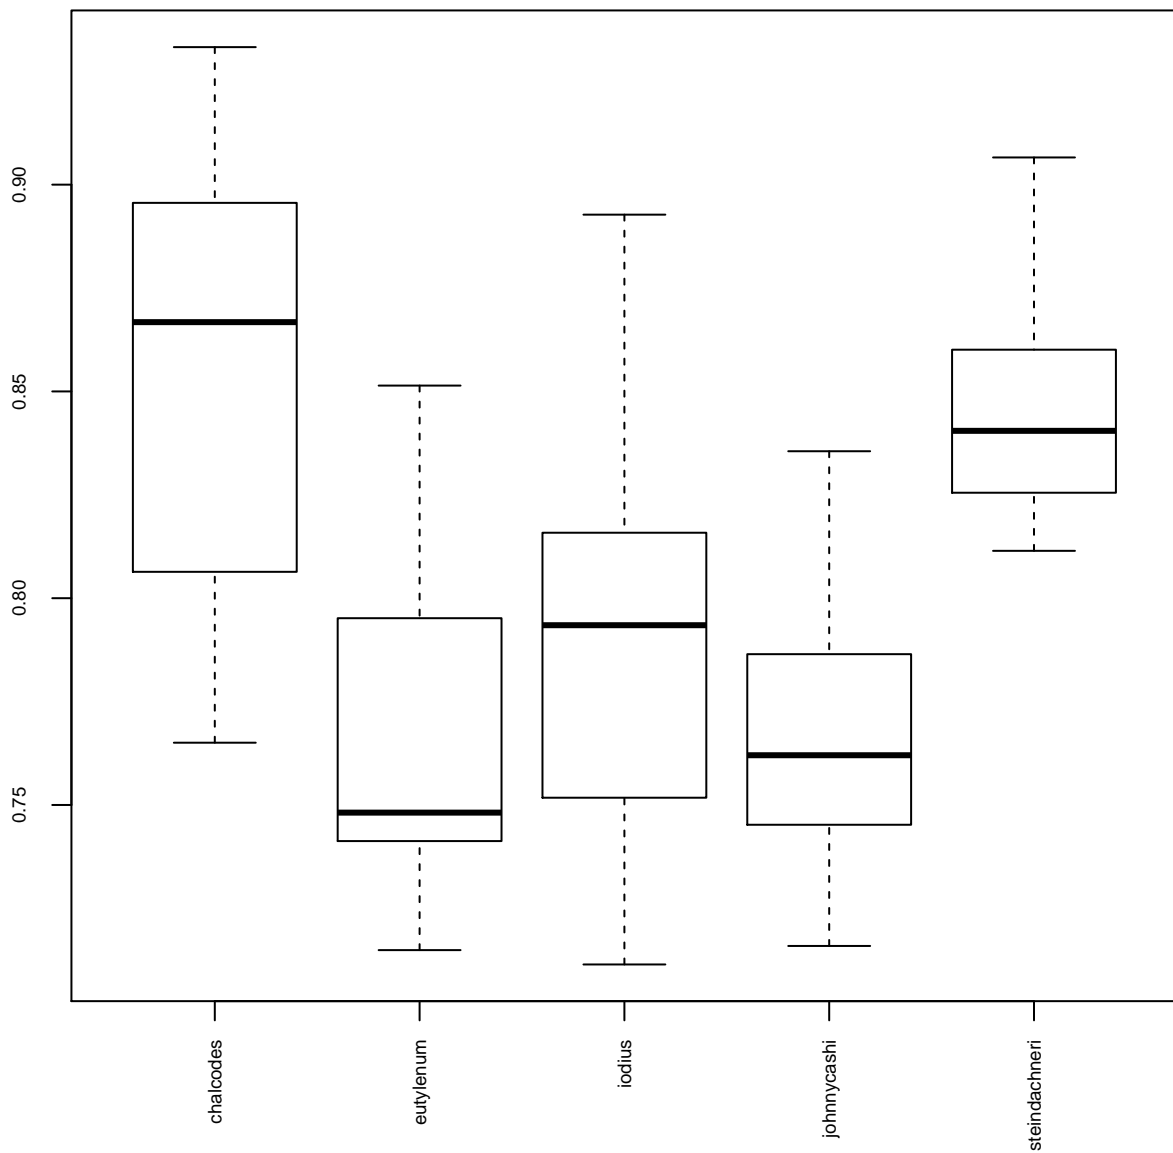

Supplement: Supplementary file 1038

## Femur 3/Tarsus 3 ratio – females

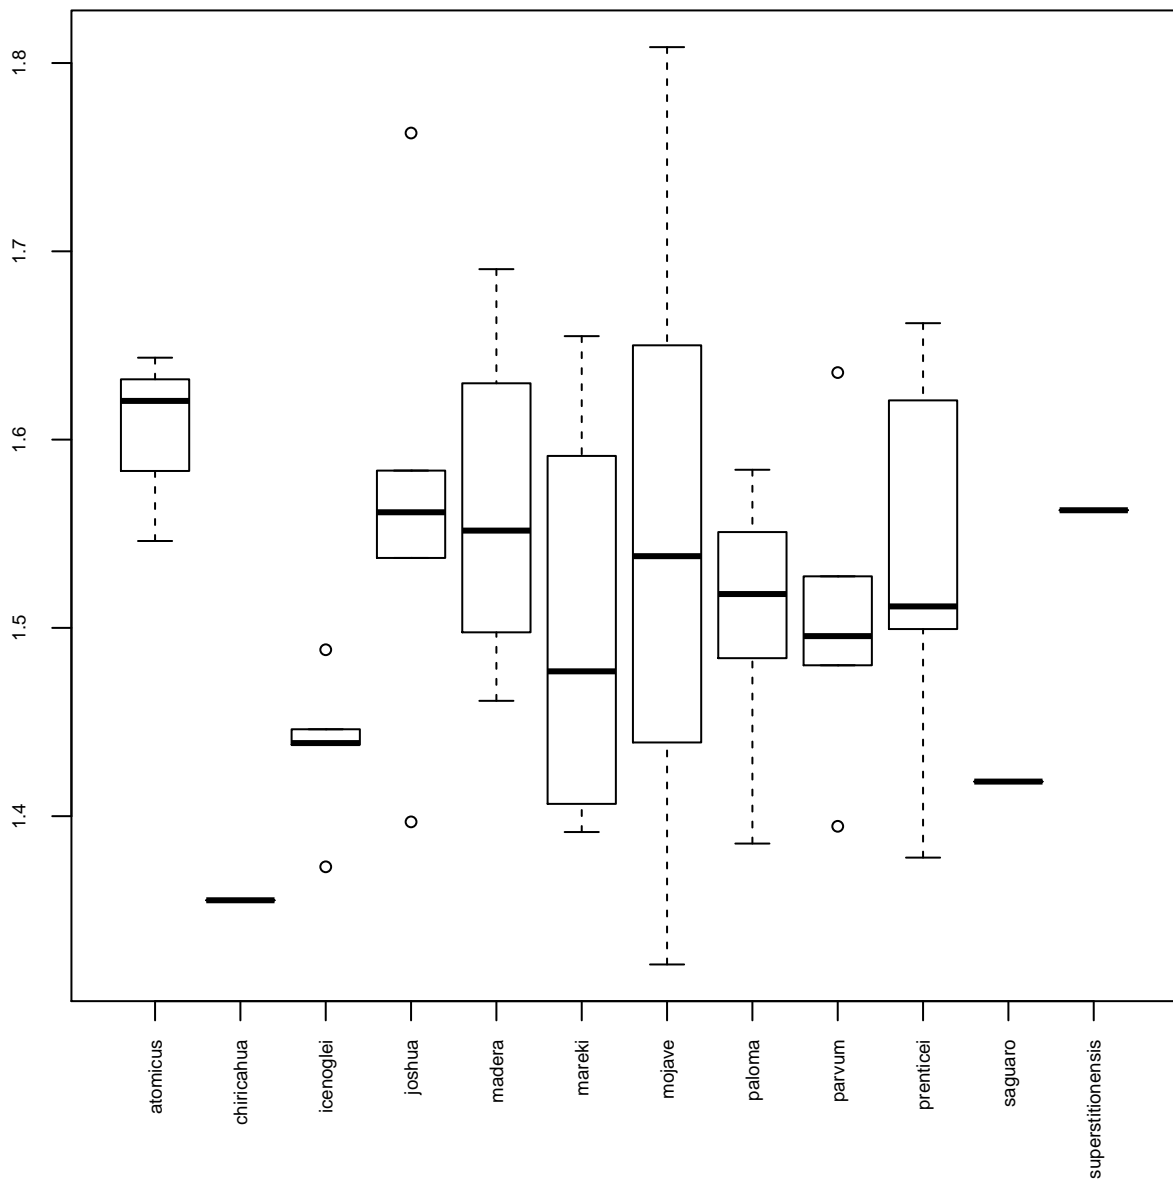

Supplement: Supplementary file 1039

## Carapace Length/Metatarsus 4 ratio – males

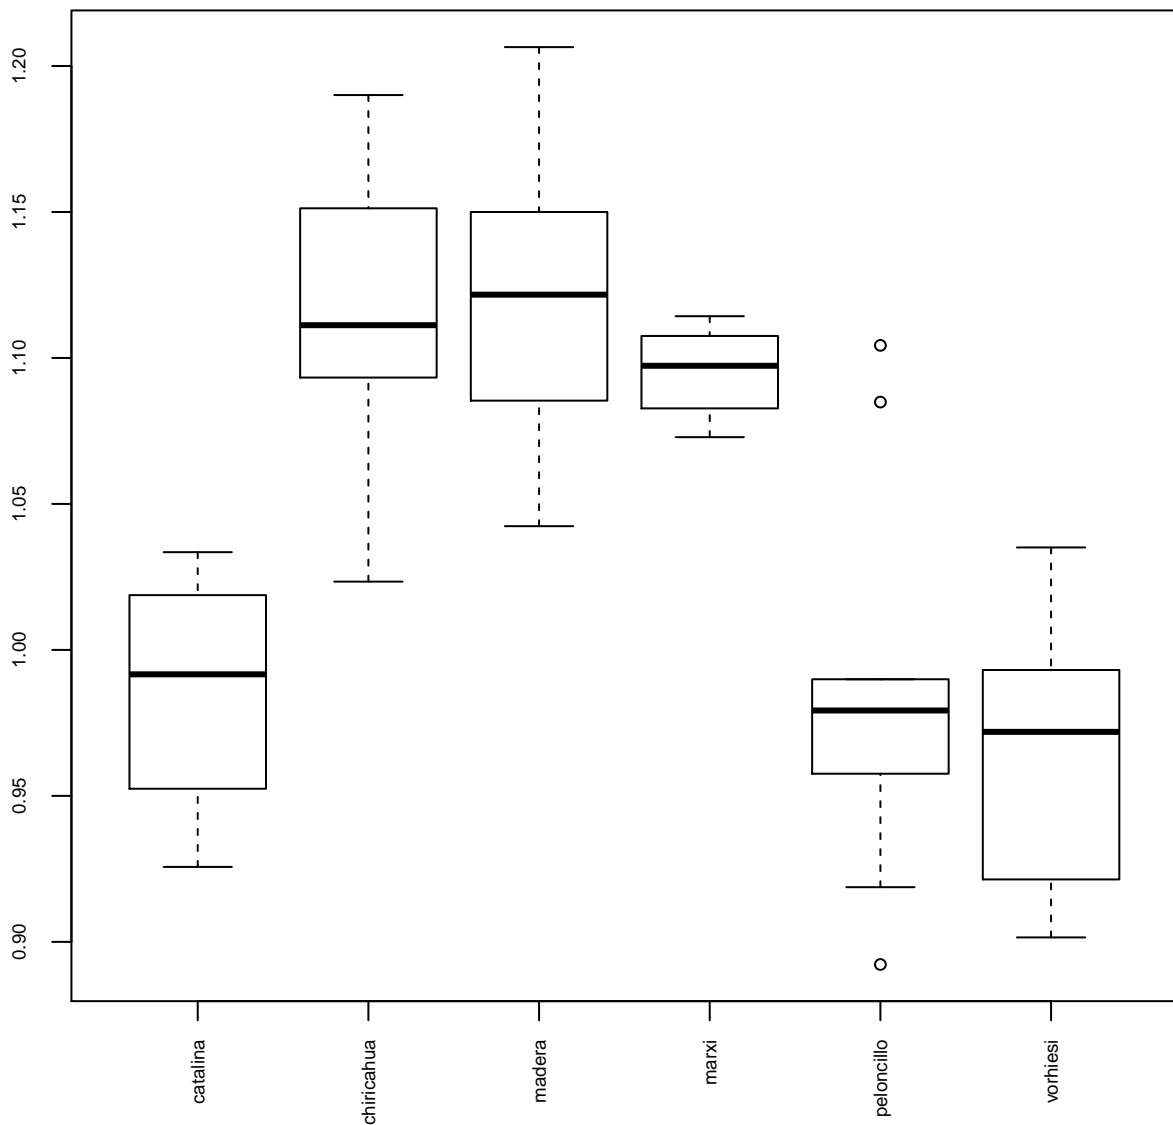

Supplement: Supplementary file 1040

## Femur 3/Tarsus 4 Length ratio – males

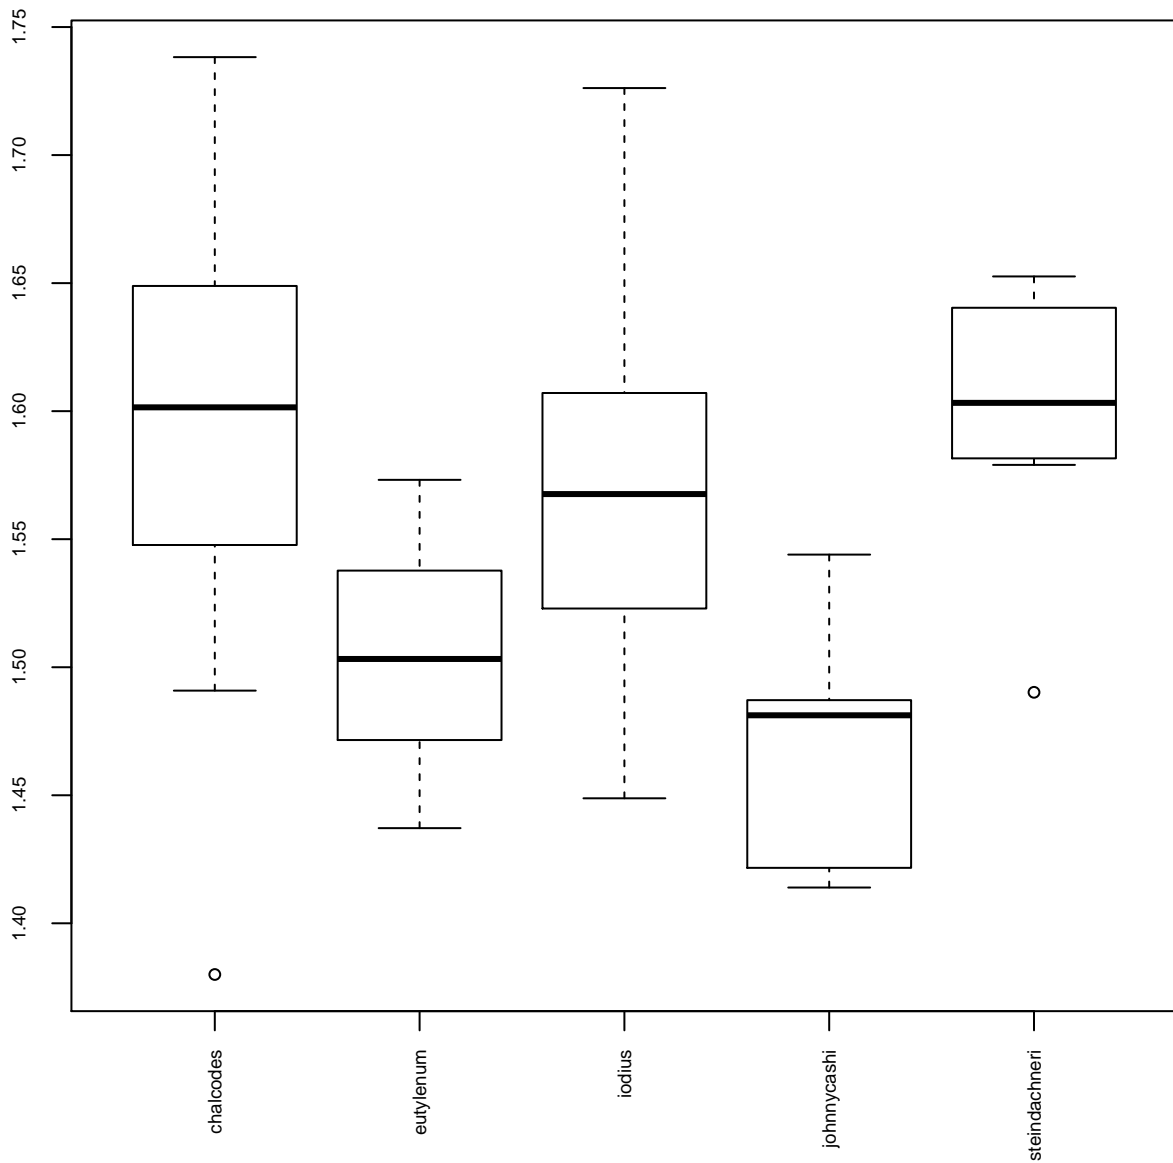

Supplement: Supplementary file 1041

## Femur 1/Tibia 1 ratio – females

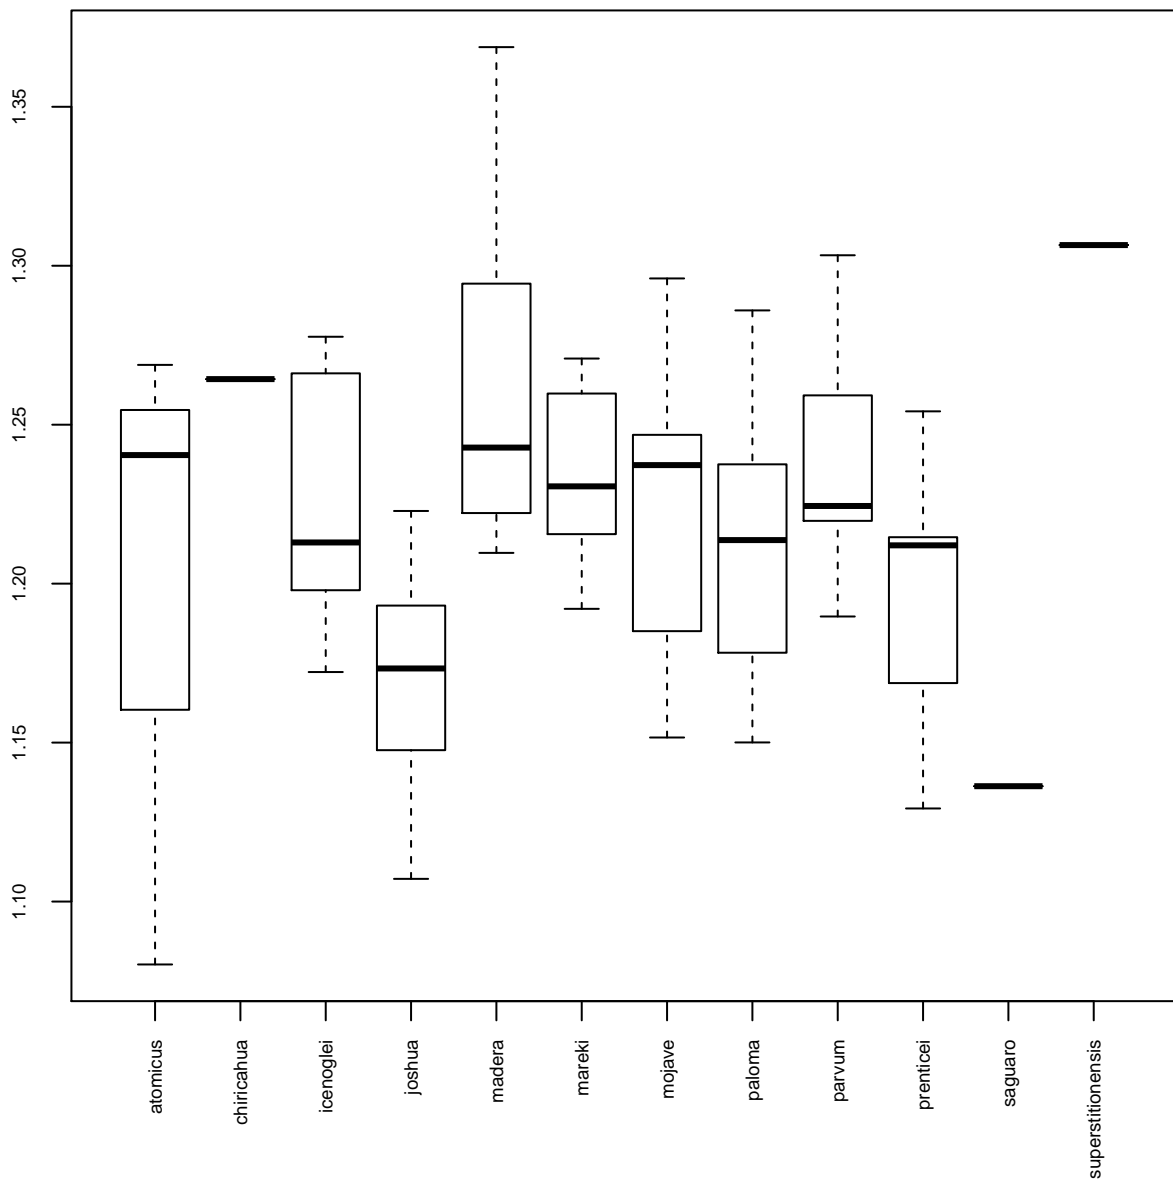

Supplement: Supplementary file 1042

## Femur 1/Patella 1 ratio – males

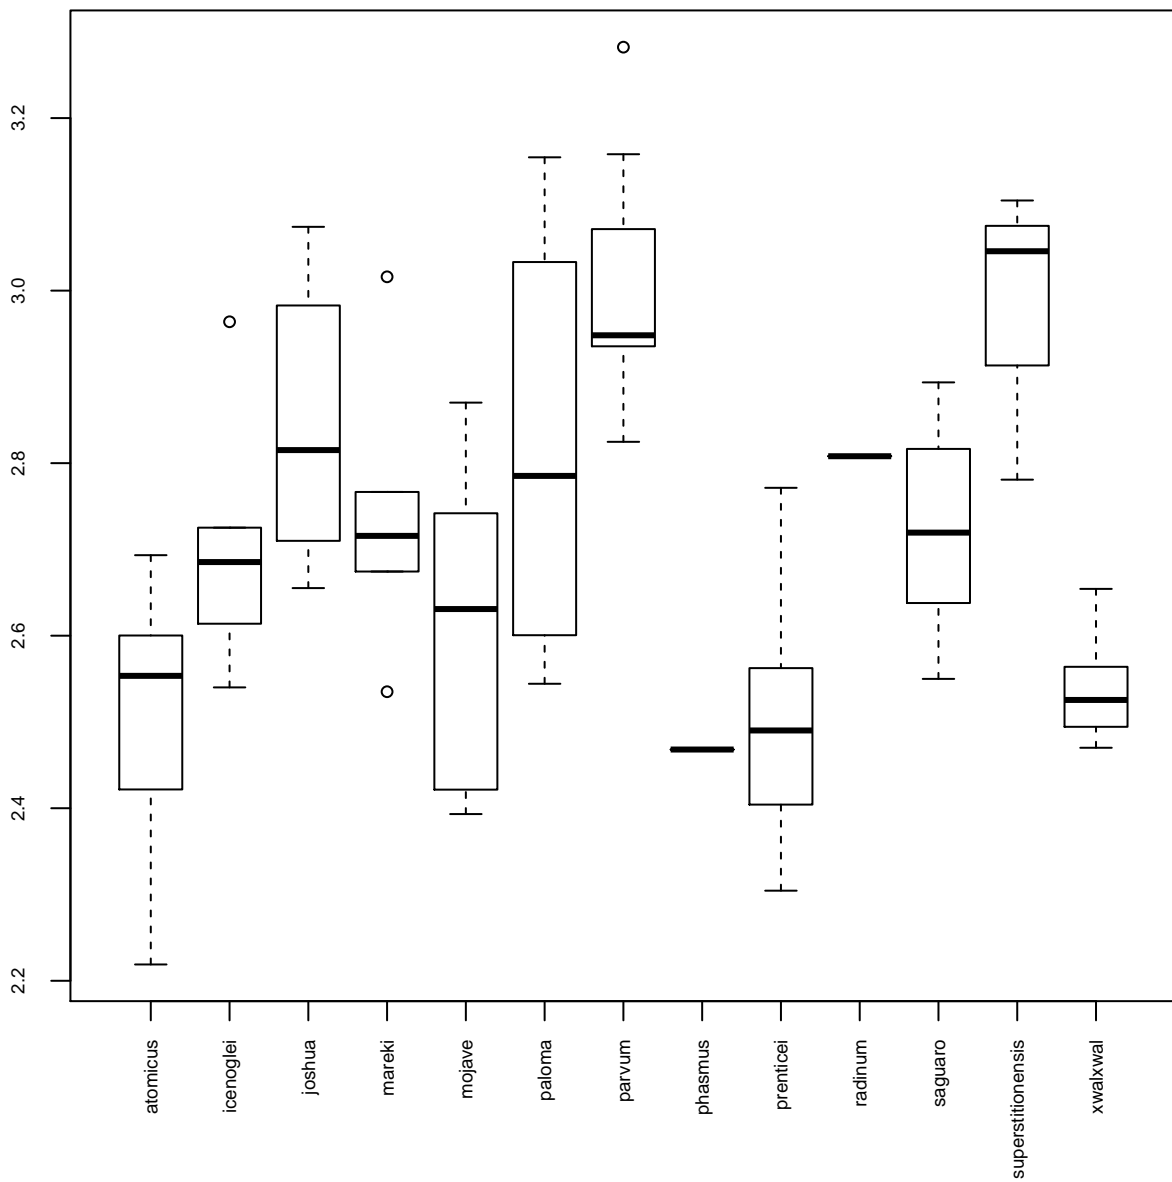

Supplement: Supplementary file 1043

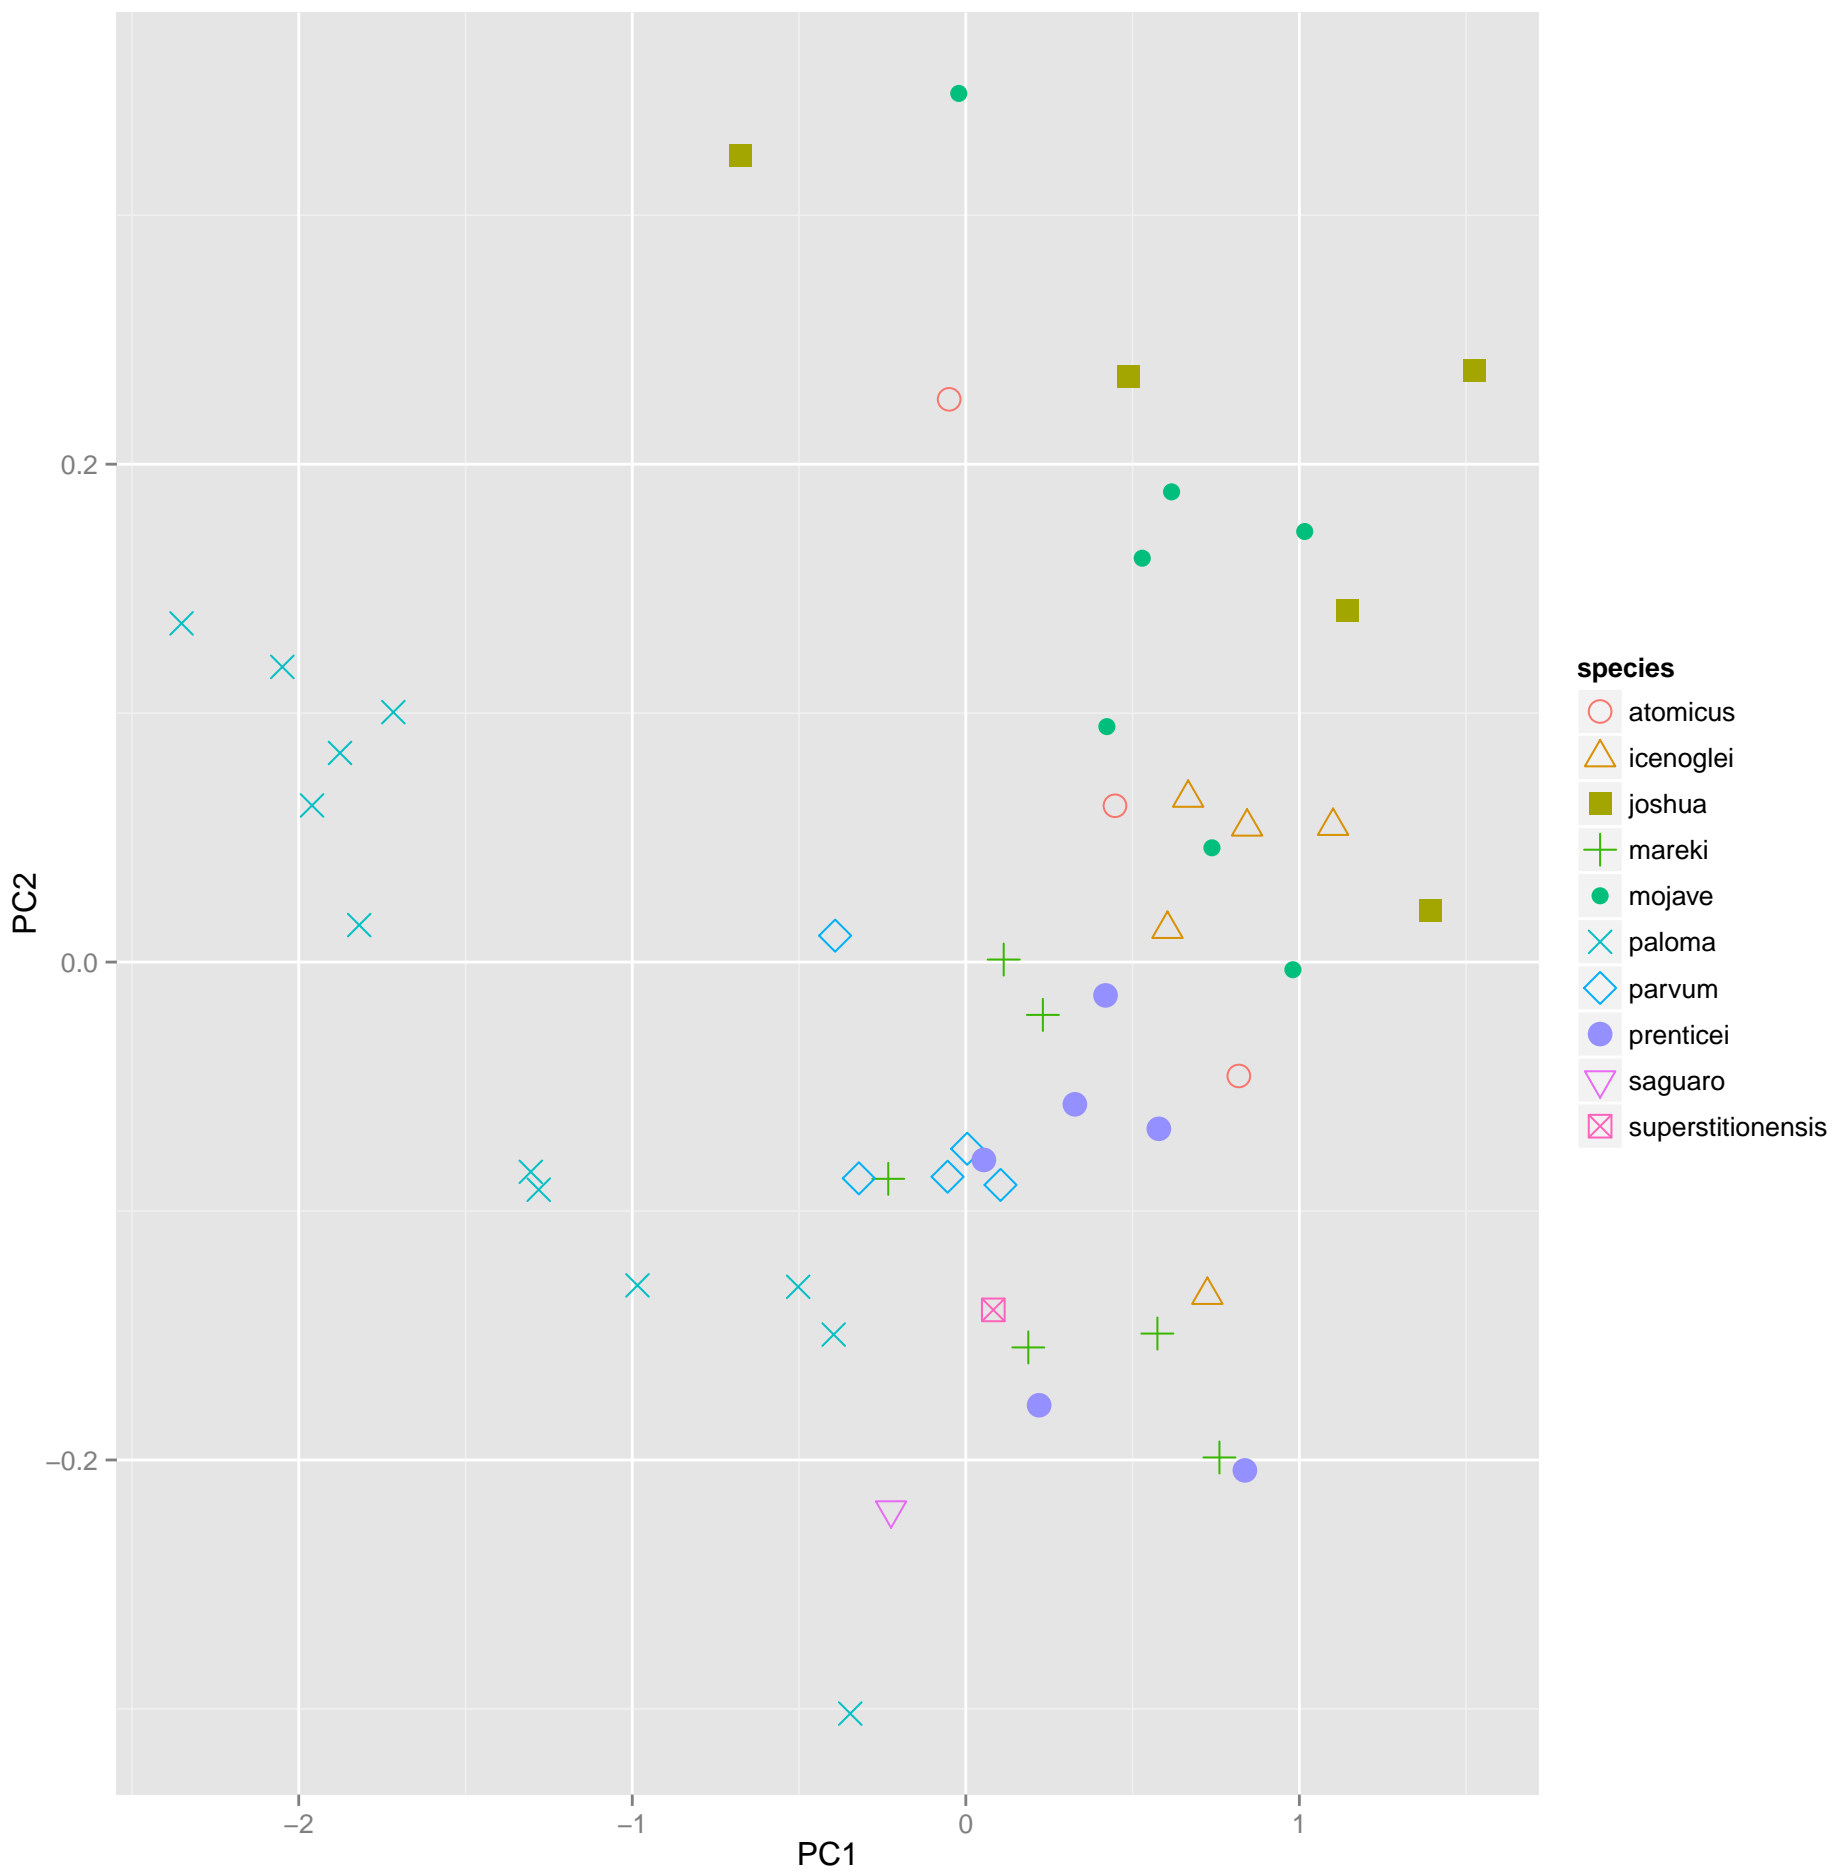

Supplement: Supplementary file 1044

## Carapace Length/Width ratio – males

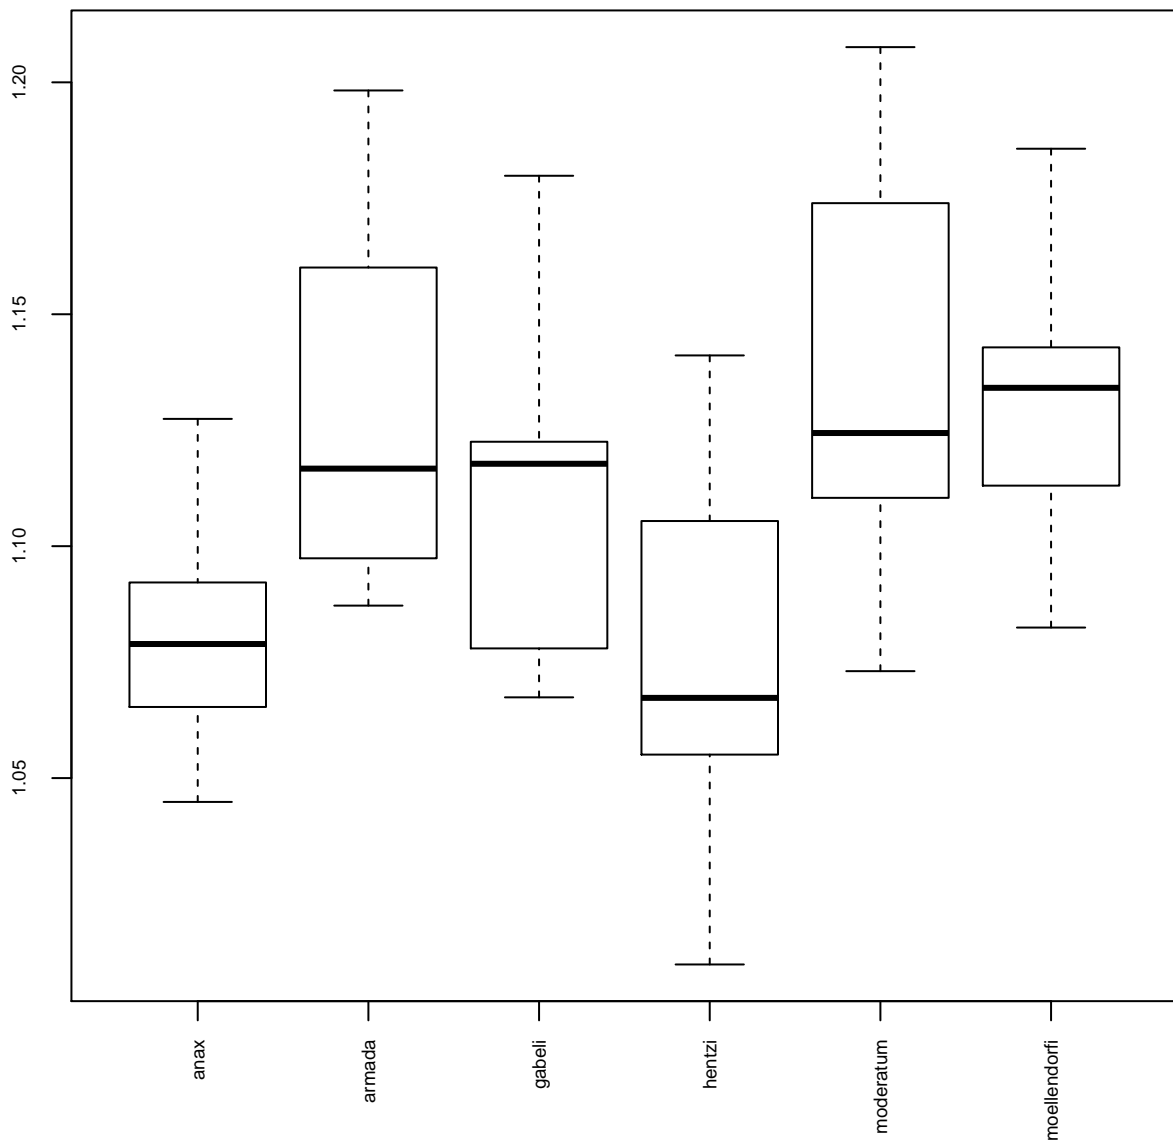

Supplement: Supplementary file 1045

# Leg 4 Length – females

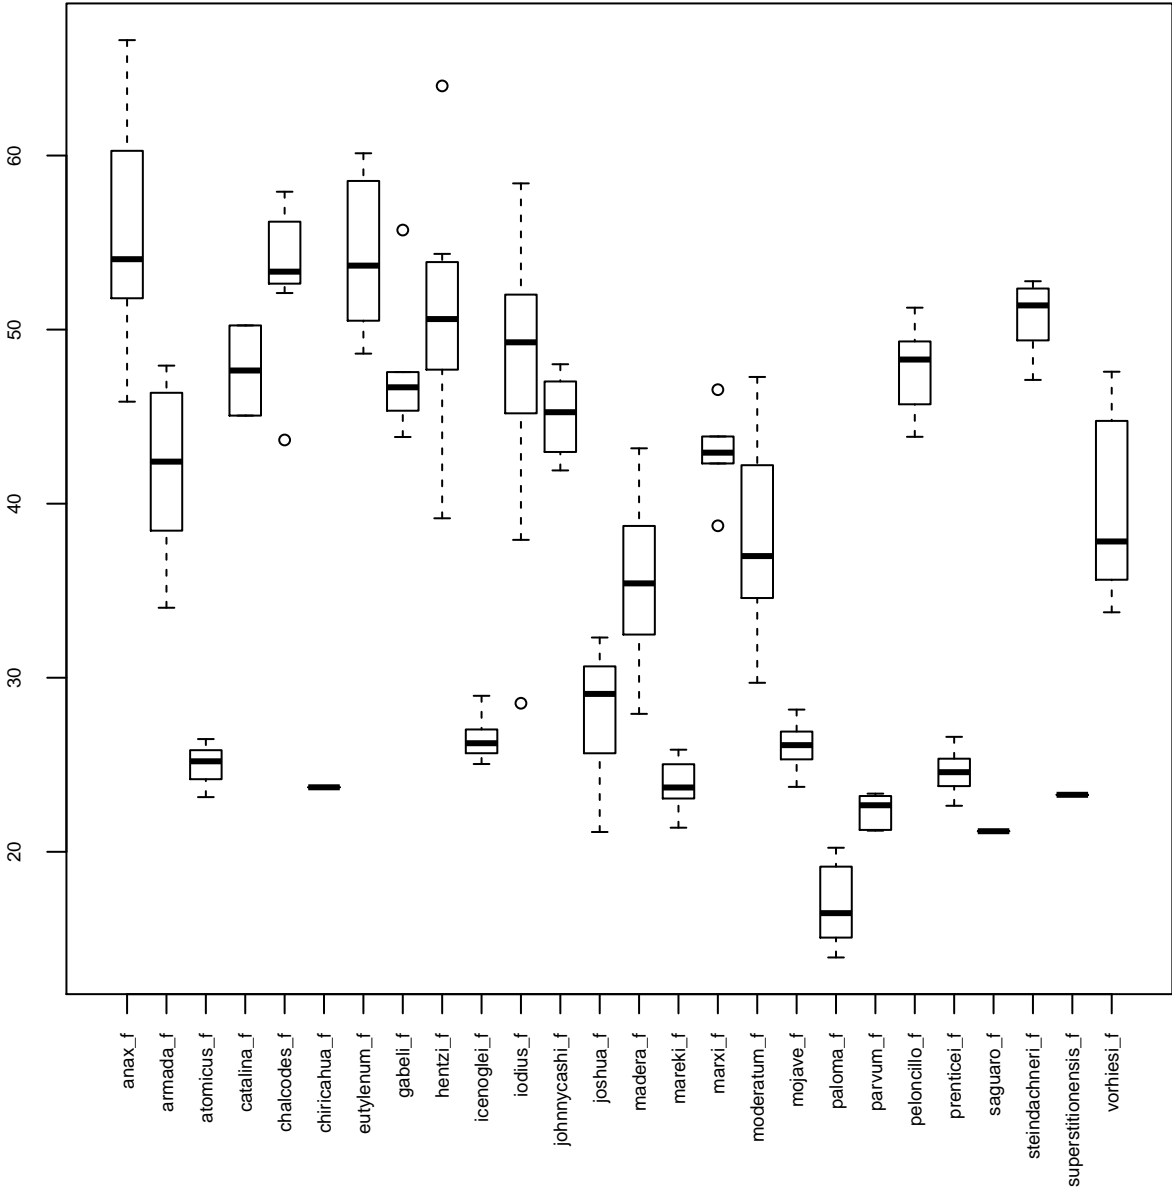

Supplement: Supplementary file 1046

## Patella 1/Tarsus 1 ratio – females

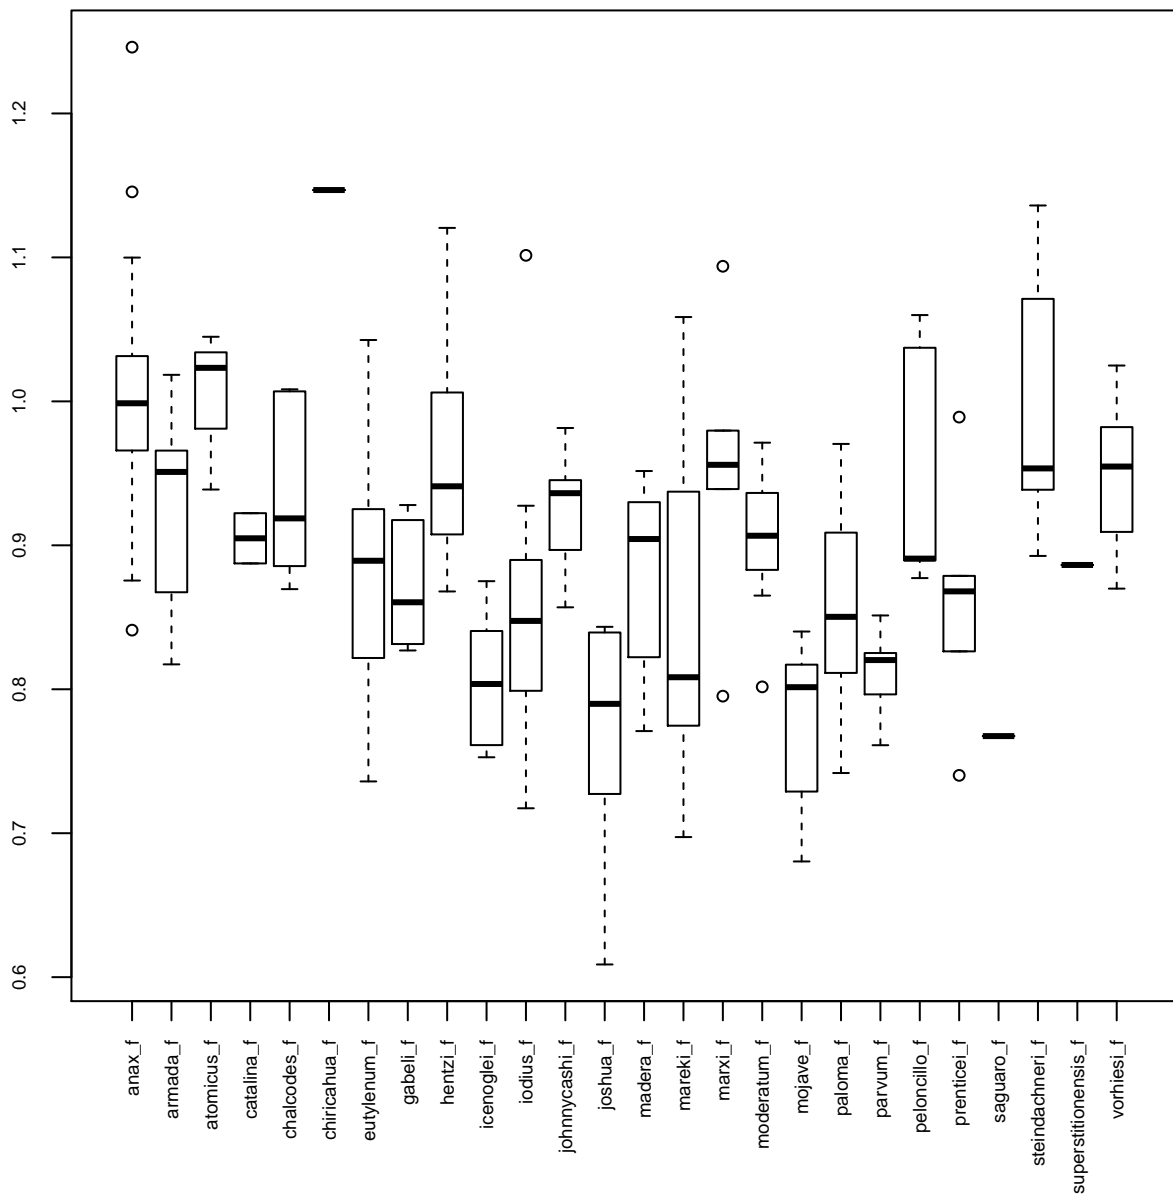

Supplement: Supplementary file 1047

# Tibia 1/Metatarsus 3 Length ratio – males

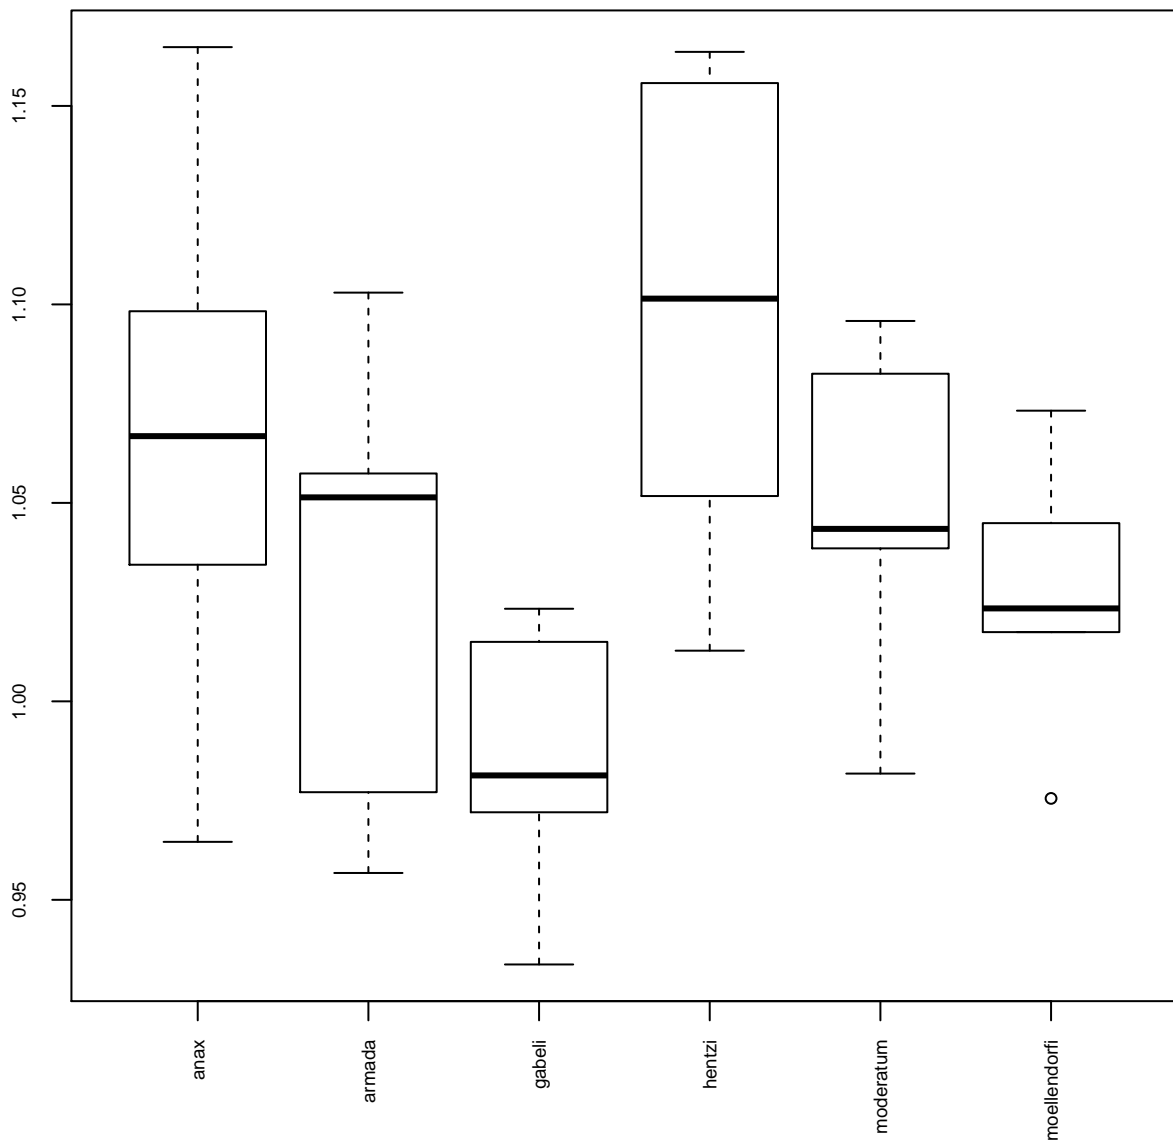

Supplement: Supplementary file 1048

## Carapace Length/Tarsus 3 ratio – males

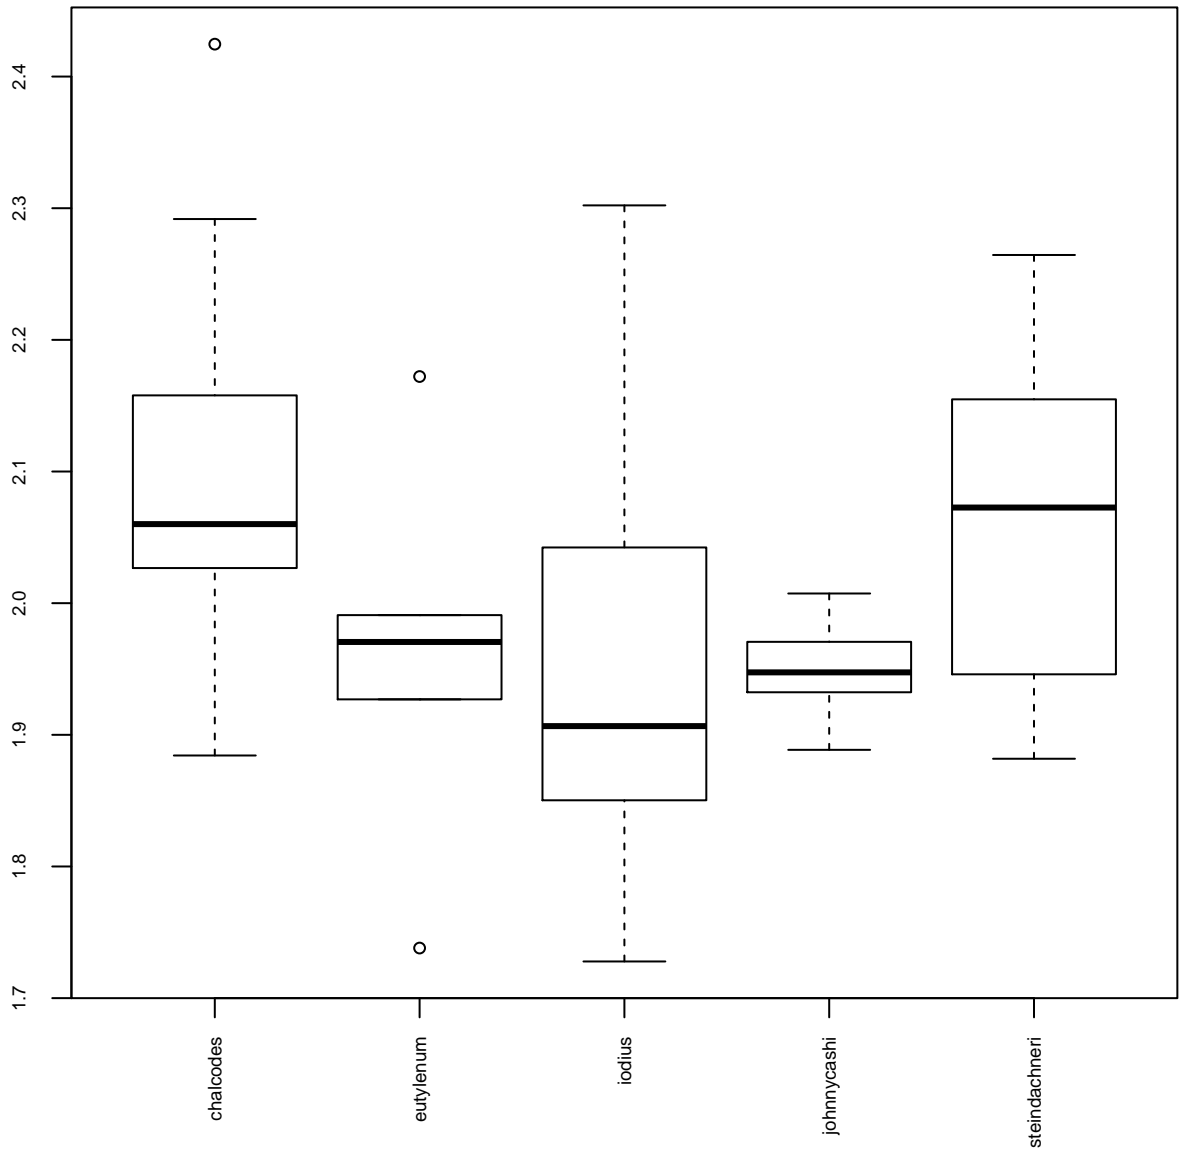

Supplement: Supplementary file 1049

## Leg 1/Leg 3 Length ratio – males

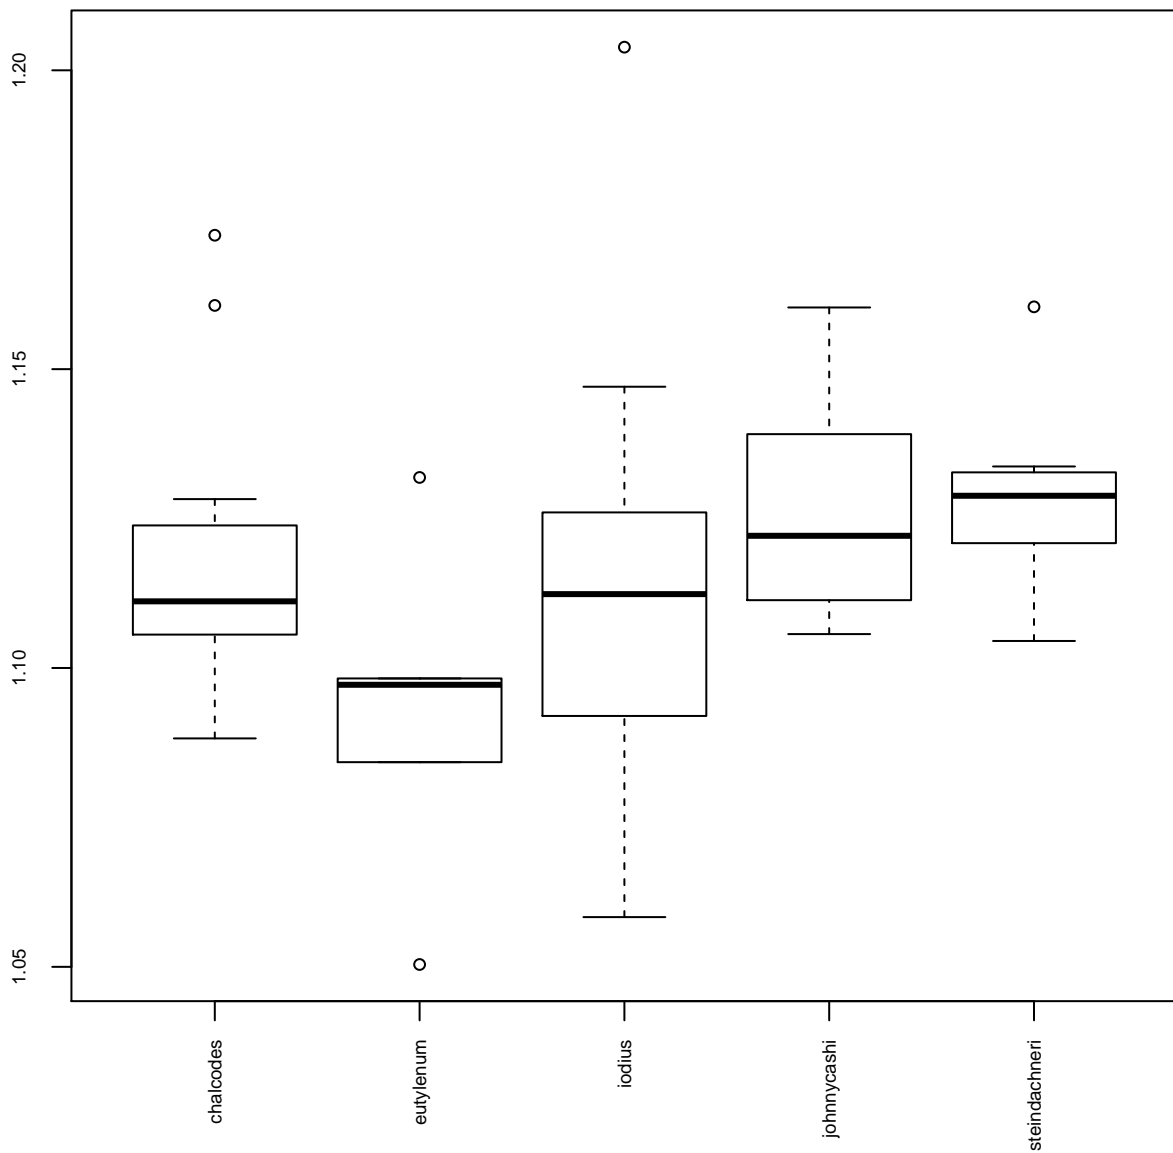

Supplement: Supplementary file 1050

# Tibia 1/Tarsus 3 Length ratio – males

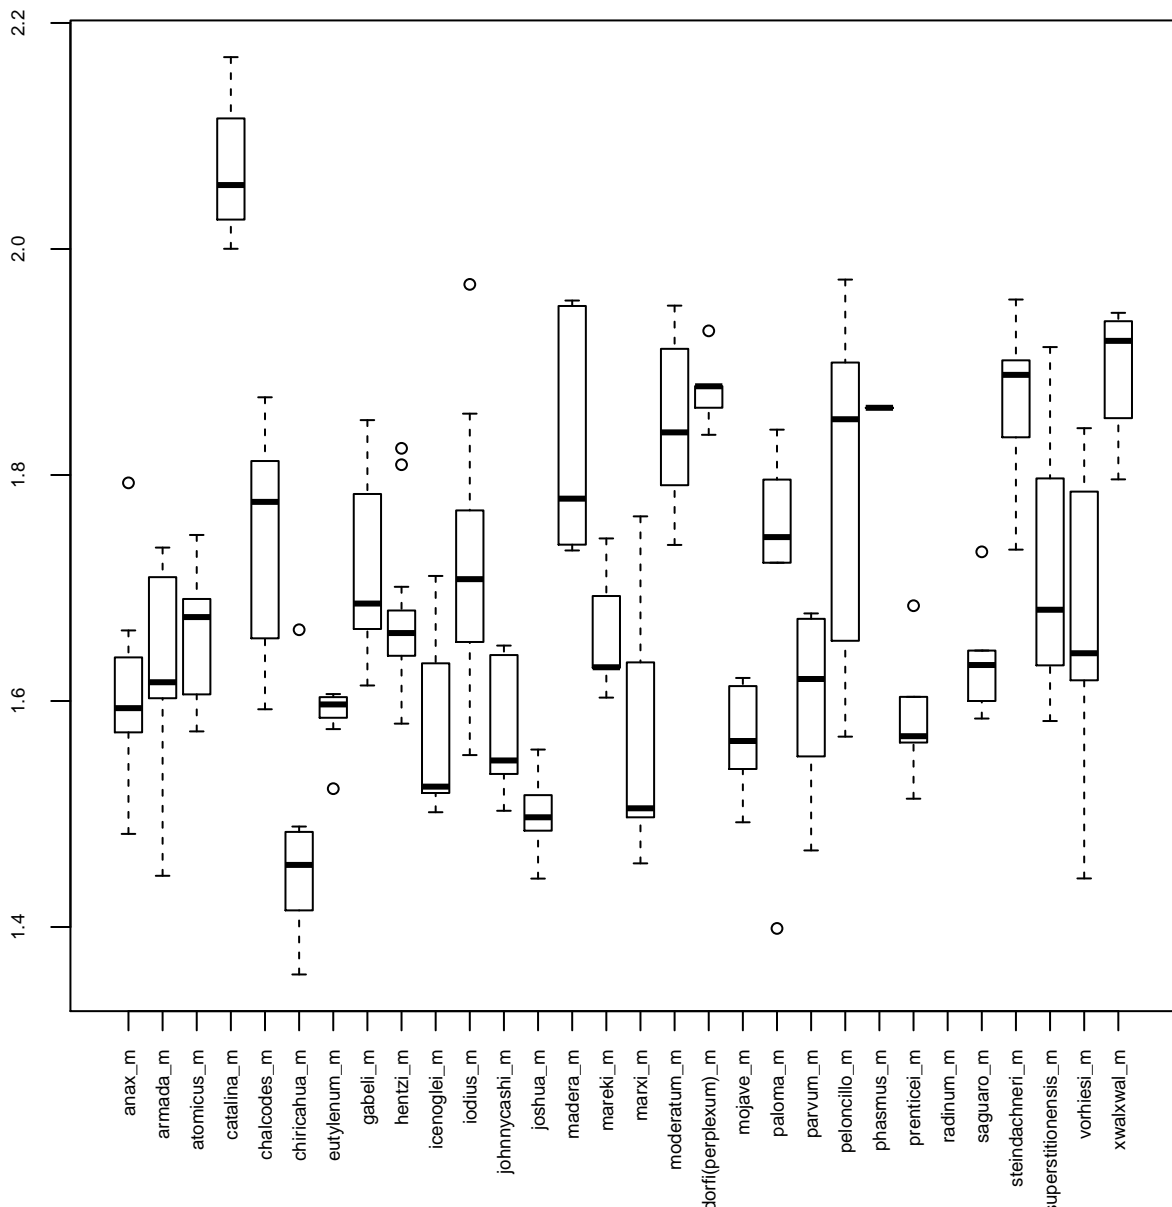

Supplement: Supplementary file 1051

## Tarsus 1/Tarsus 3 ratio – males

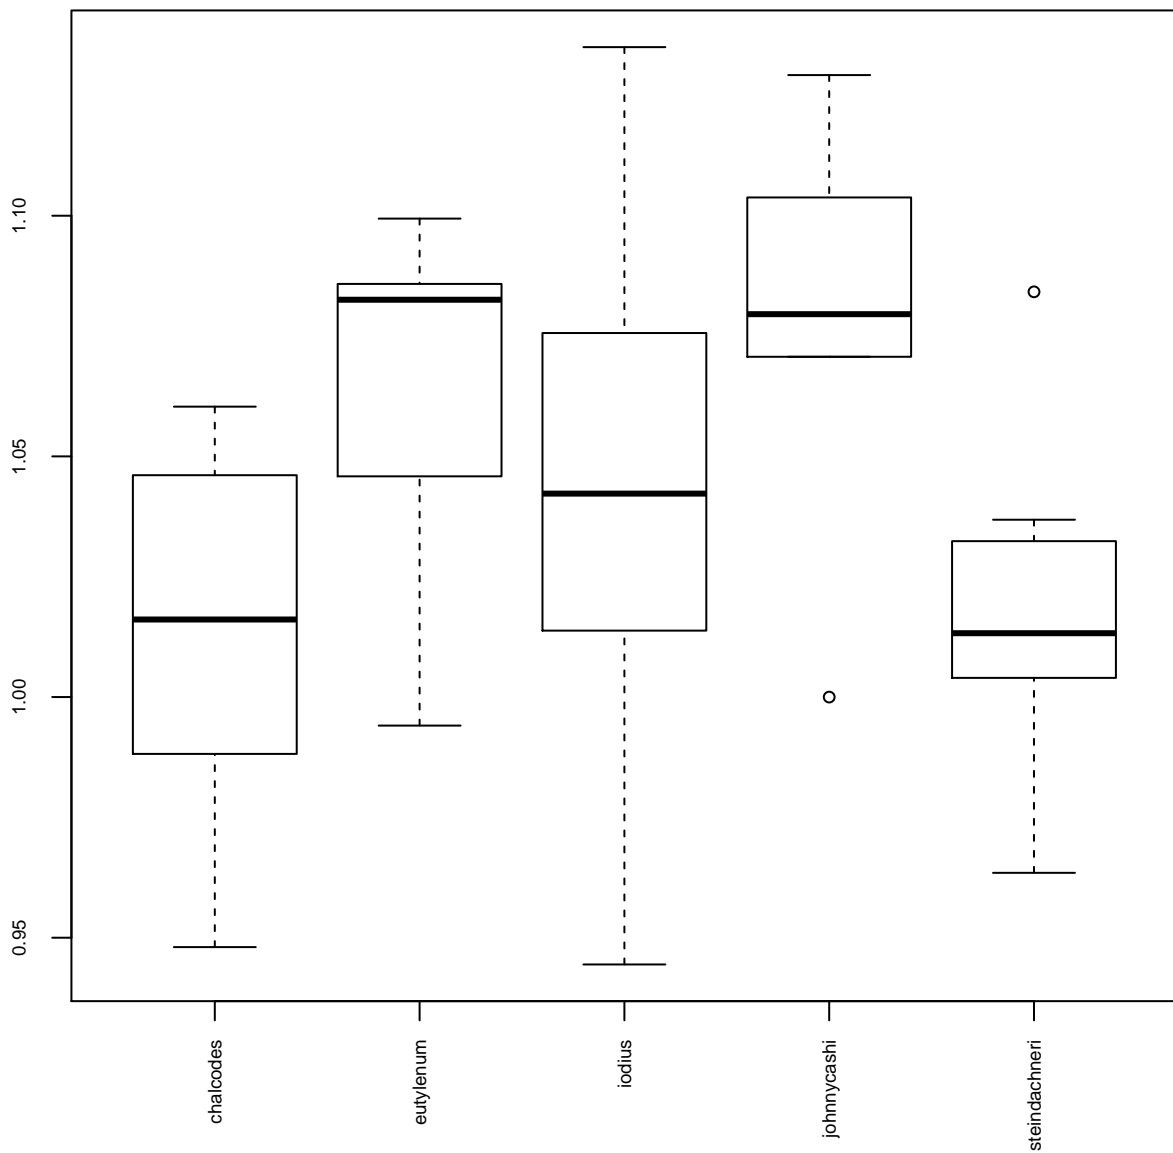

Supplement: Supplementary file 1052

## Carapace Length/Patella 3 ratio – males

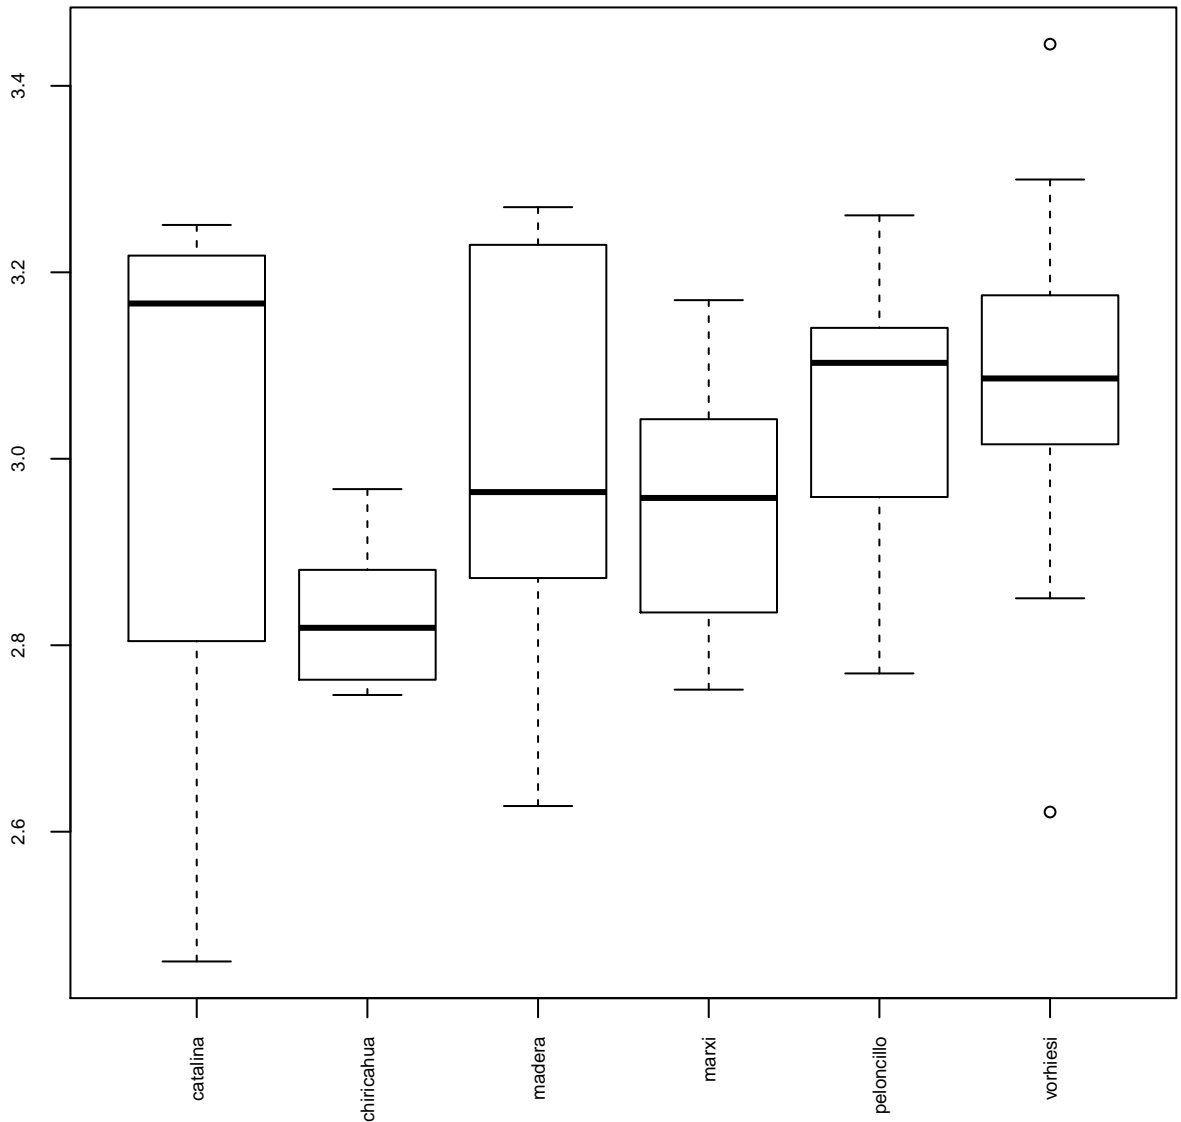

Supplement: Supplementary file 1053

## Tibia 1/Metatarsus 4 Length ratio – males

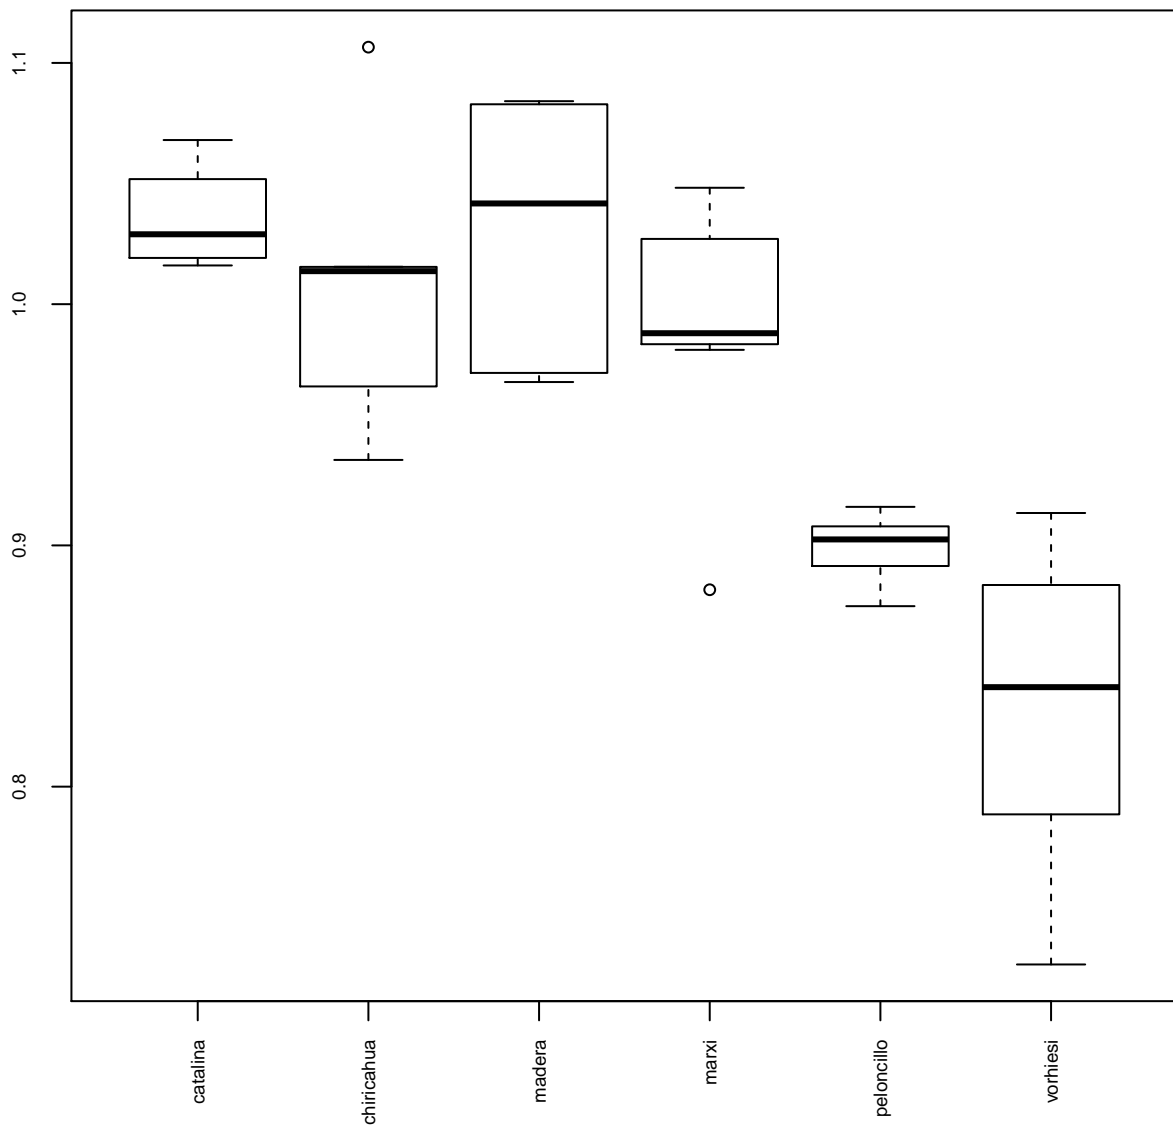

Supplement: Supplementary file 1054

## Metatarsus 1/Metatarsus 4 ratio – males

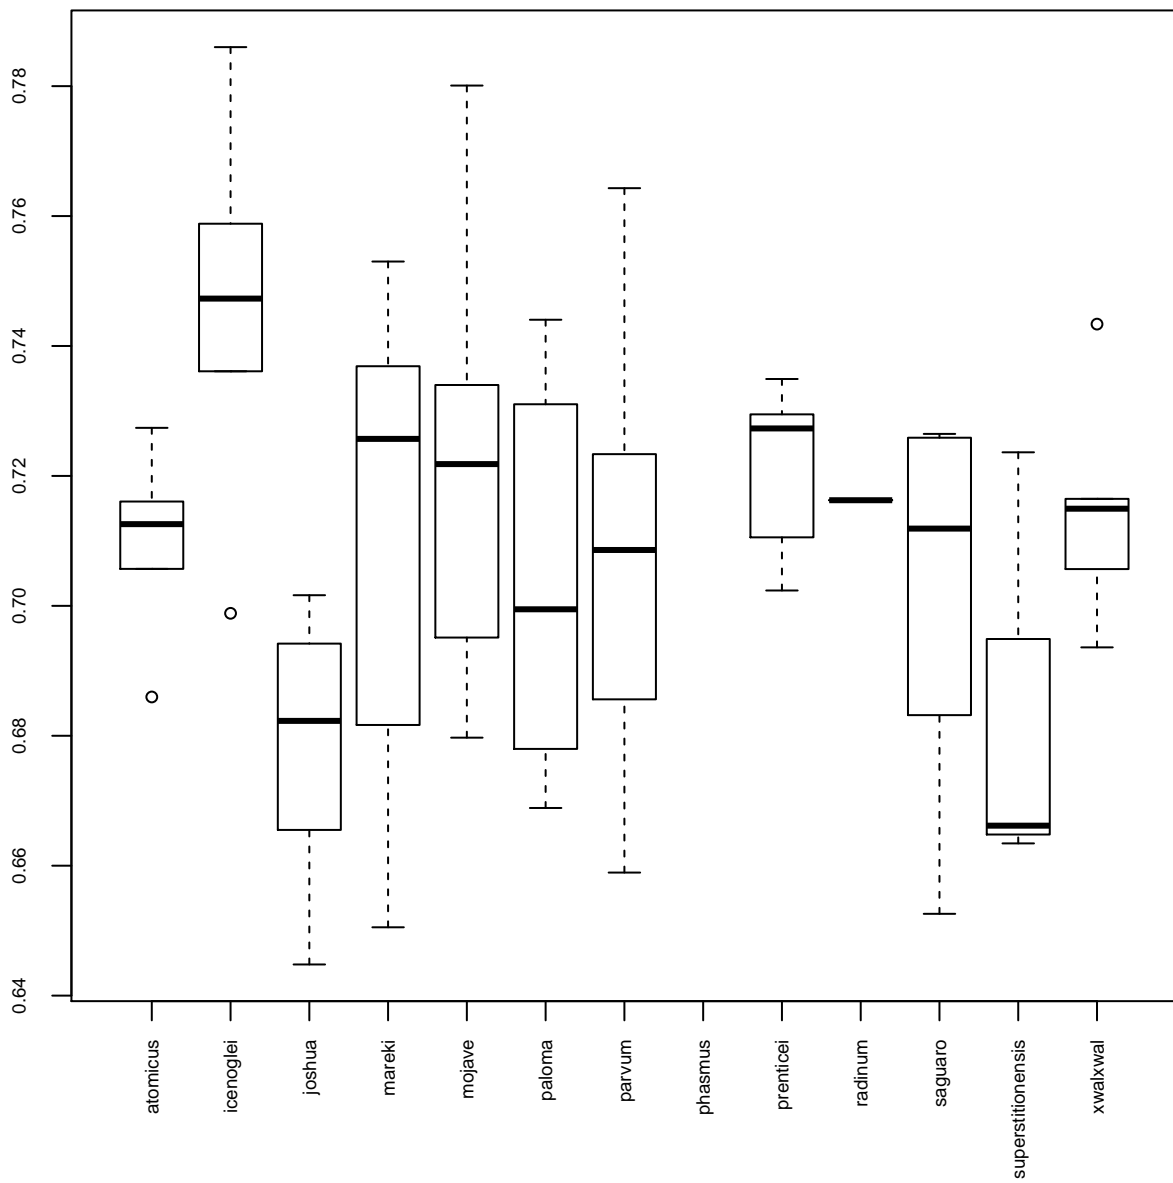

Supplement: Supplementary file 1055

## Patella 1/Tibia 1 ratio – males

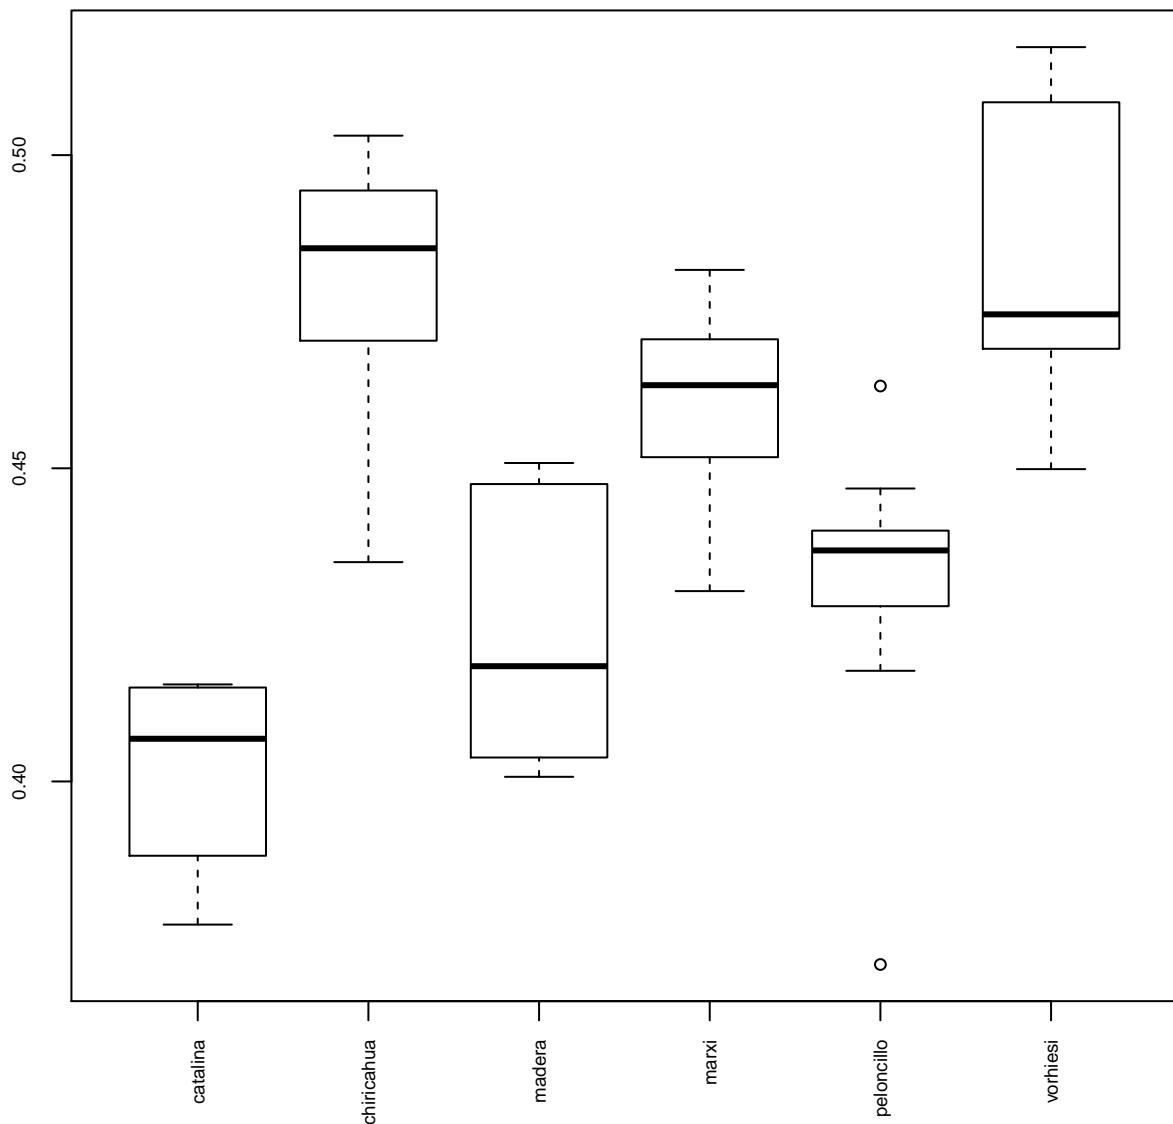

Supplement: Supplementary file 1056

# Carapace Length/Tarsus 3 ratio – males

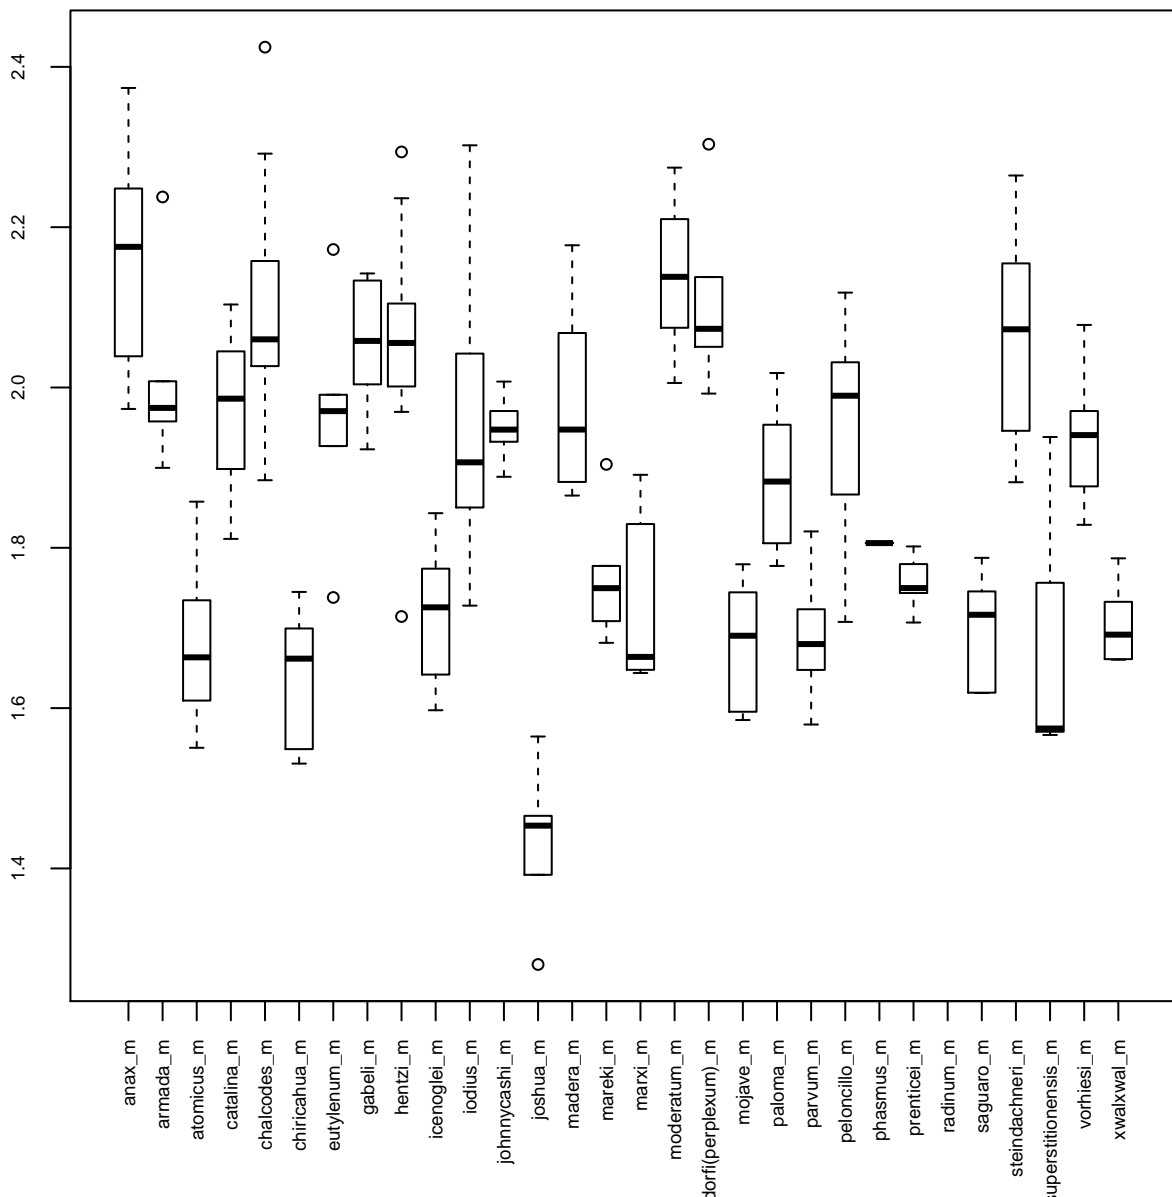

Supplement: Supplementary file 1057

## Patella 1/Tibia 1 ratio – males

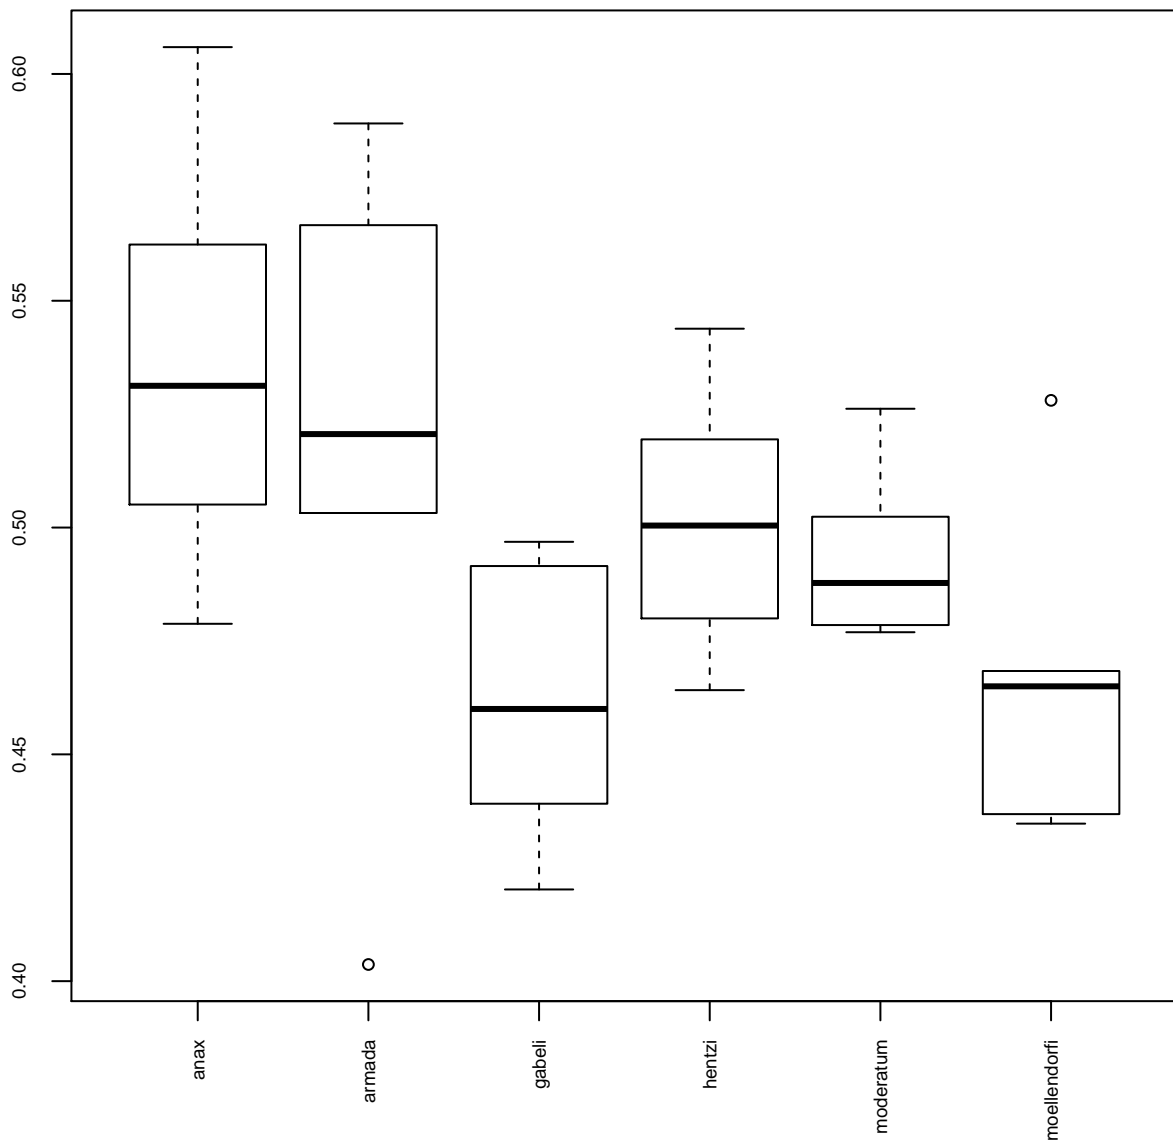

Supplement: Supplementary file 1058

## Leg 1 Length – females

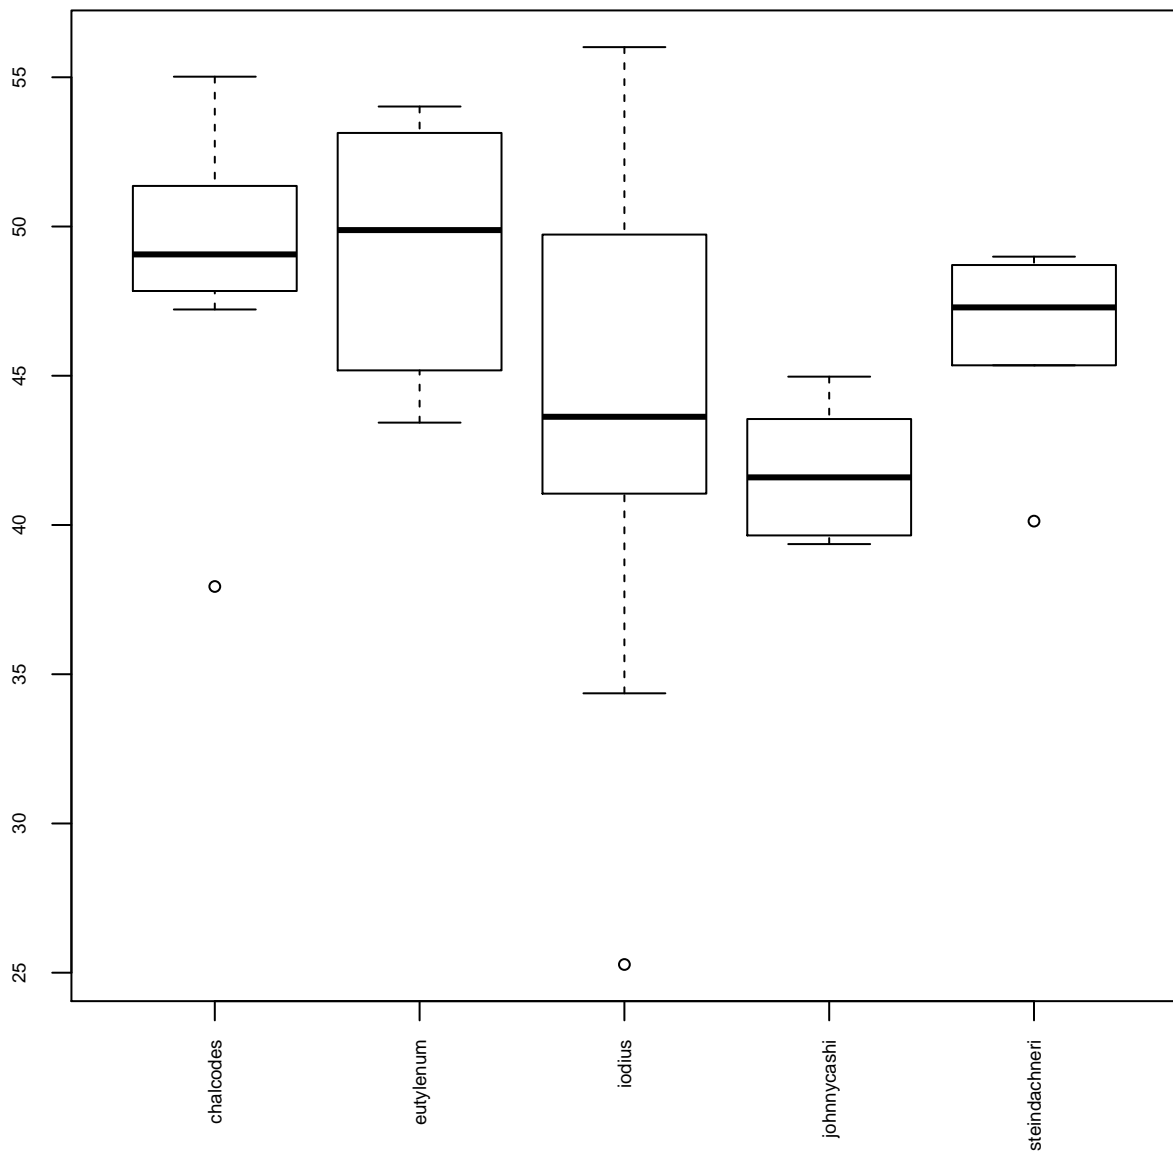

Supplement: Supplementary file 1059

## Palpal Tibia/Tarsus 4 Length ratio – males

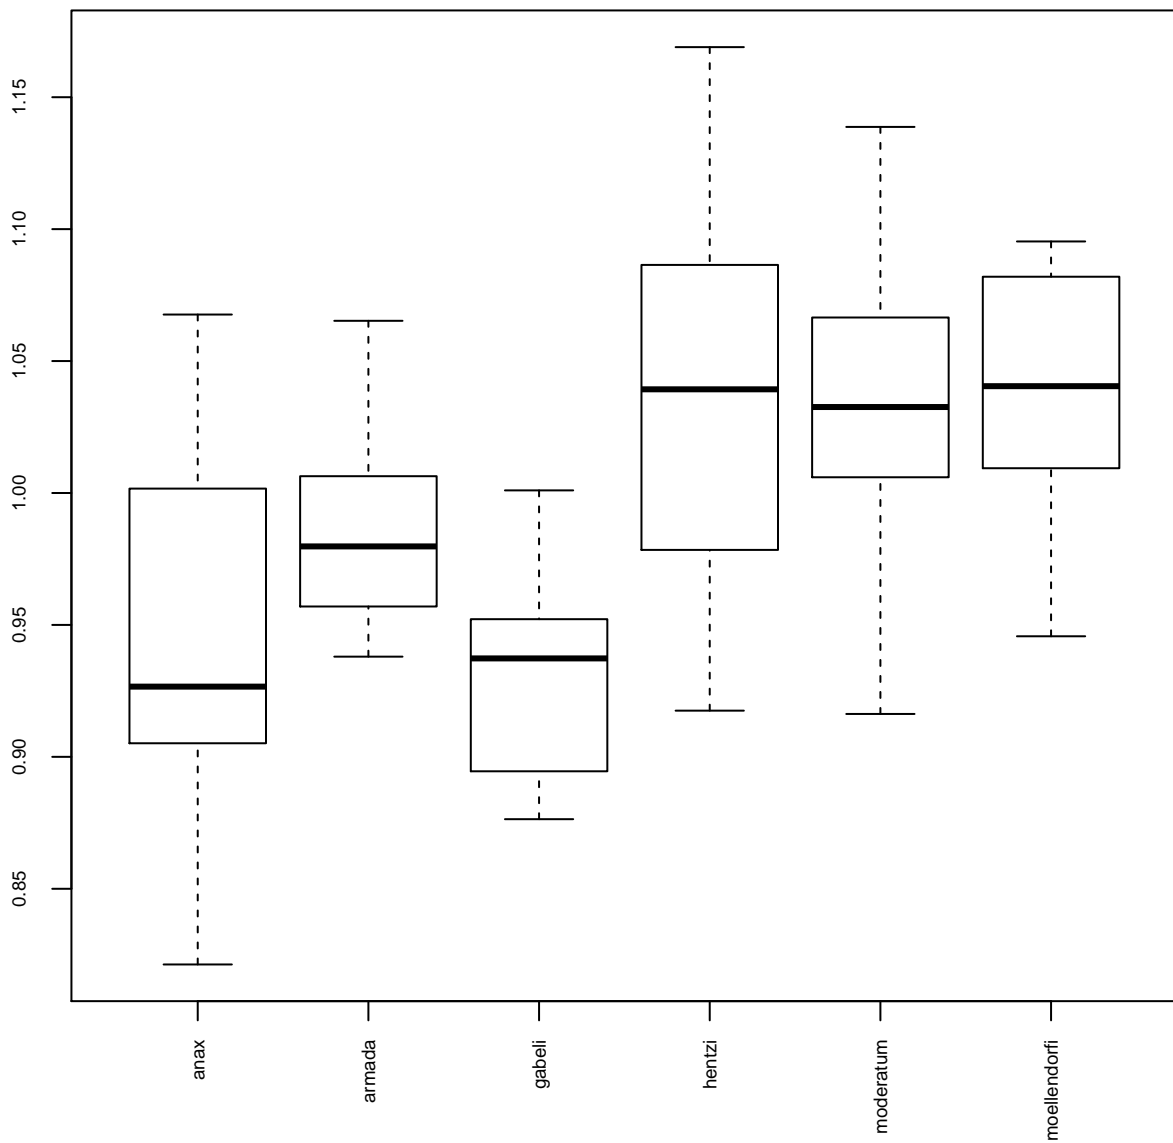

Supplement: Supplementary file 1060

## Patella 1/Tarsus 3 Length ratio – females

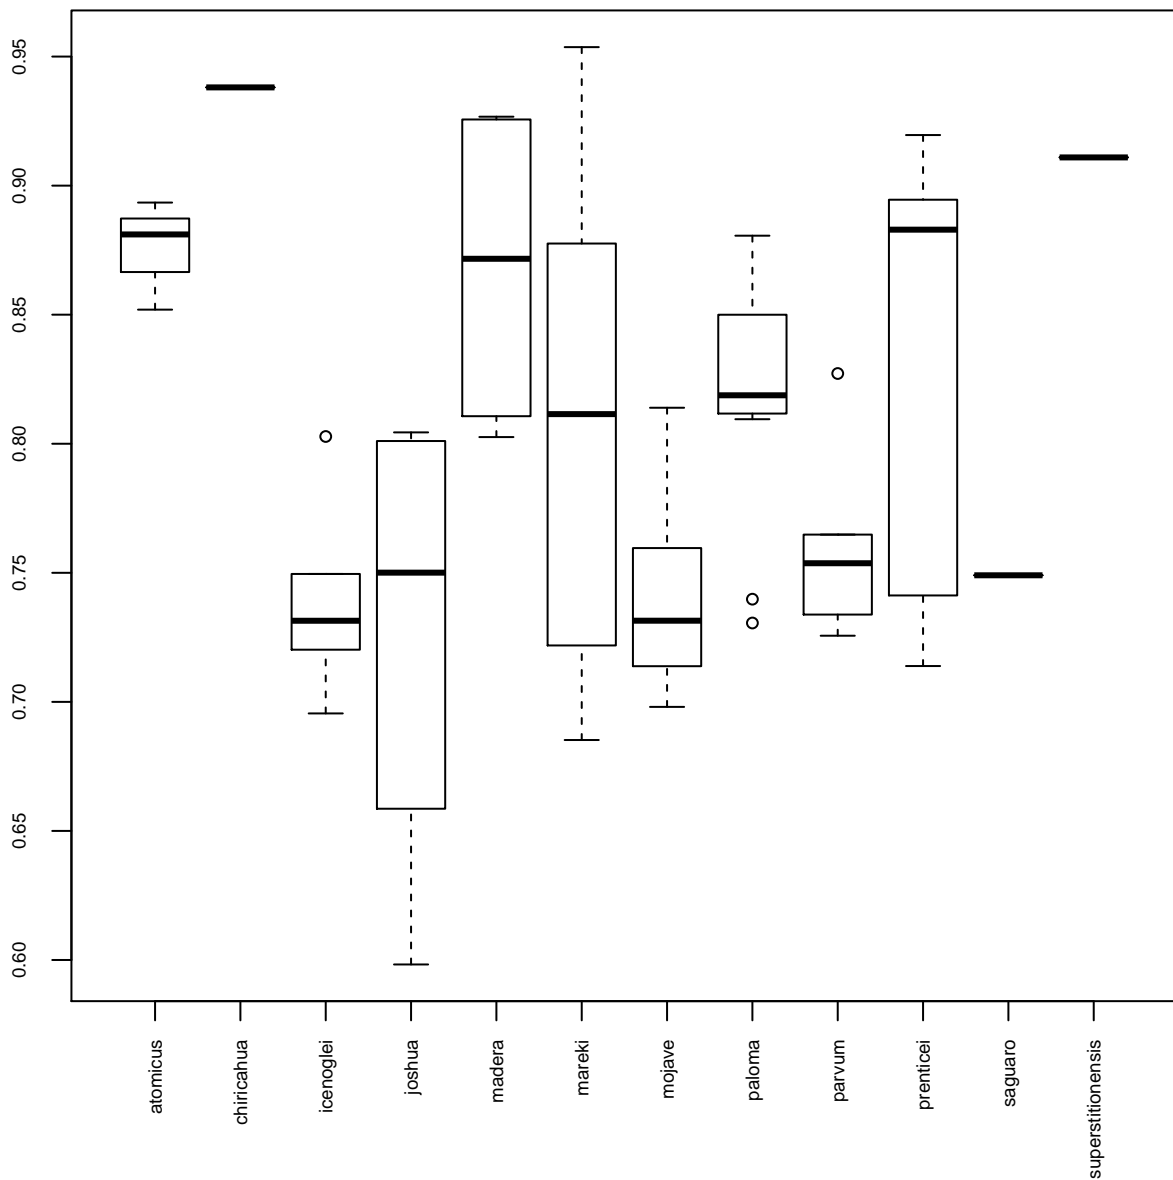

Supplement: Supplementary file 1061

## Metatarsus 1/Tibia 3 Length ratio – females

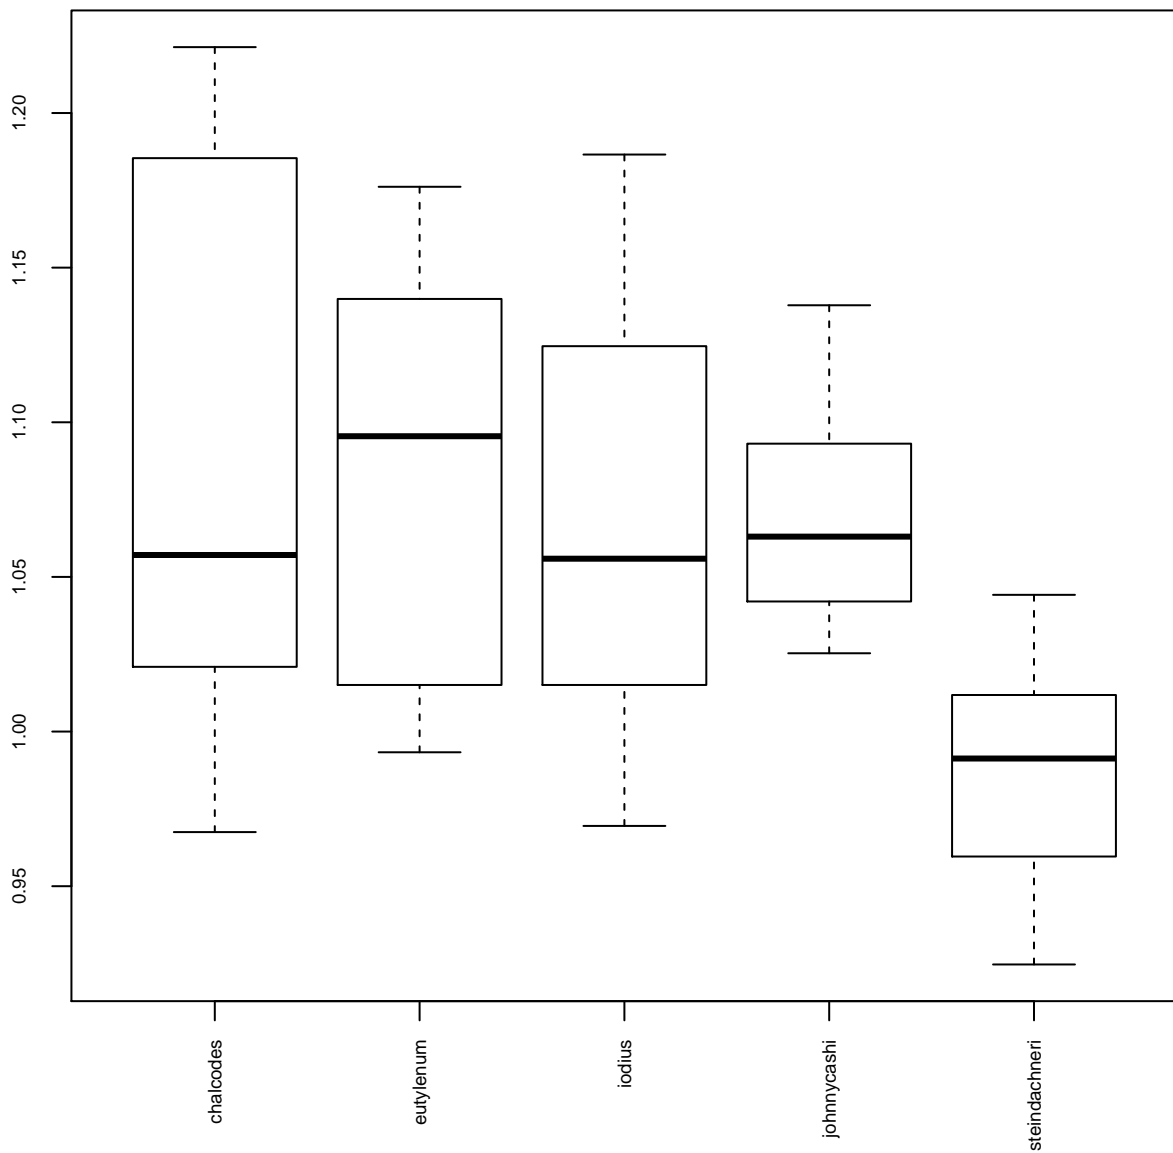

Supplement: Supplementary file 1062

## Patella 3/Tarsus 3 ratio – females

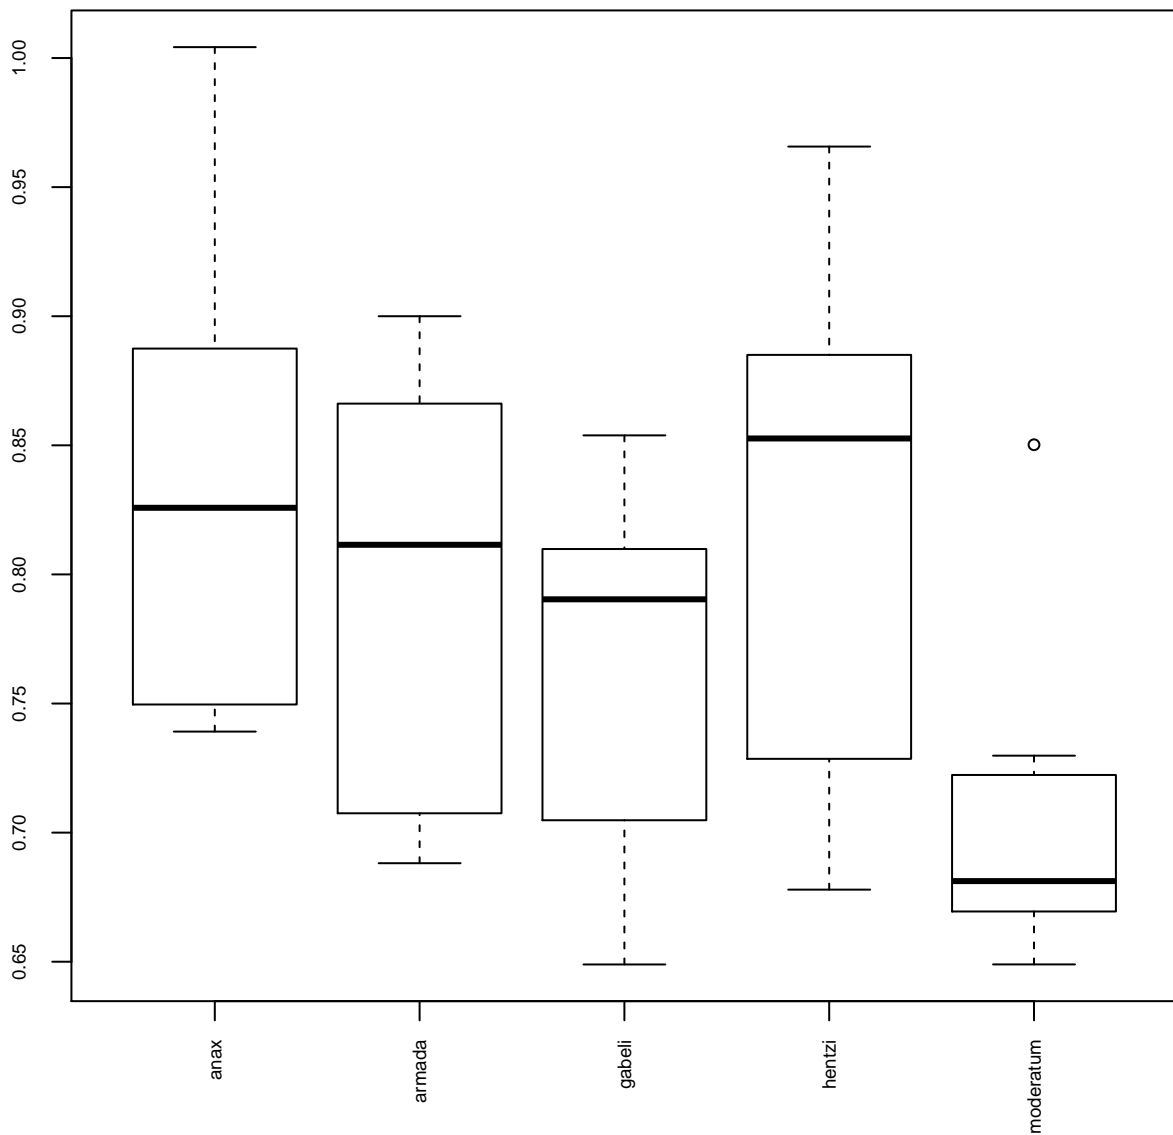

Supplement: Supplementary file 1063

## Carapace Length/Width ratio – females

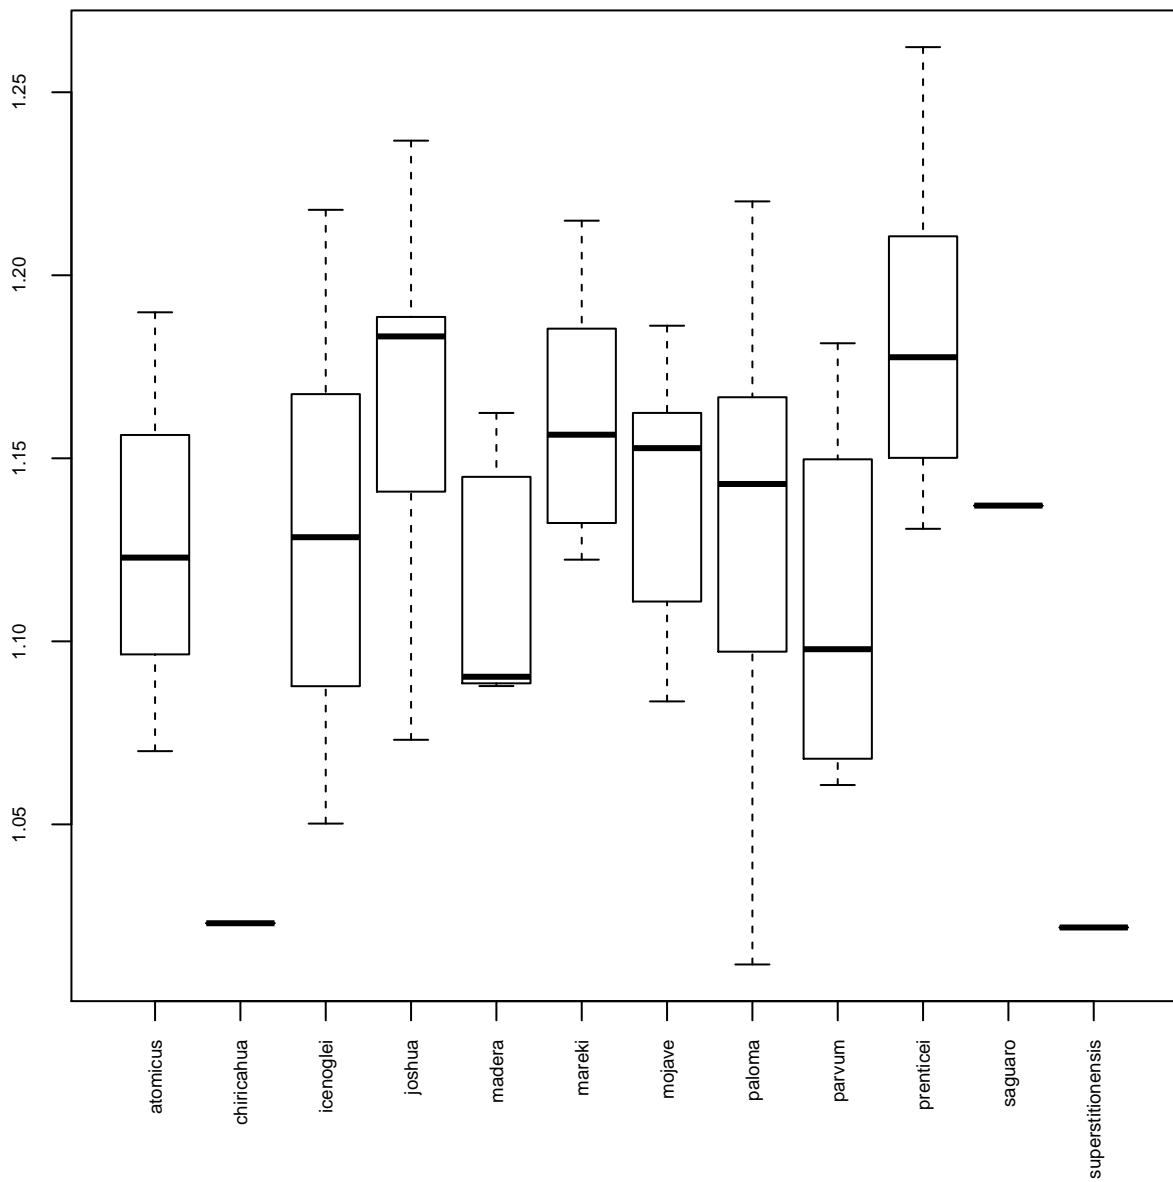

Supplement: Supplementary file 1064

# Patella 3/Metatarsus 4 Length ratio – females

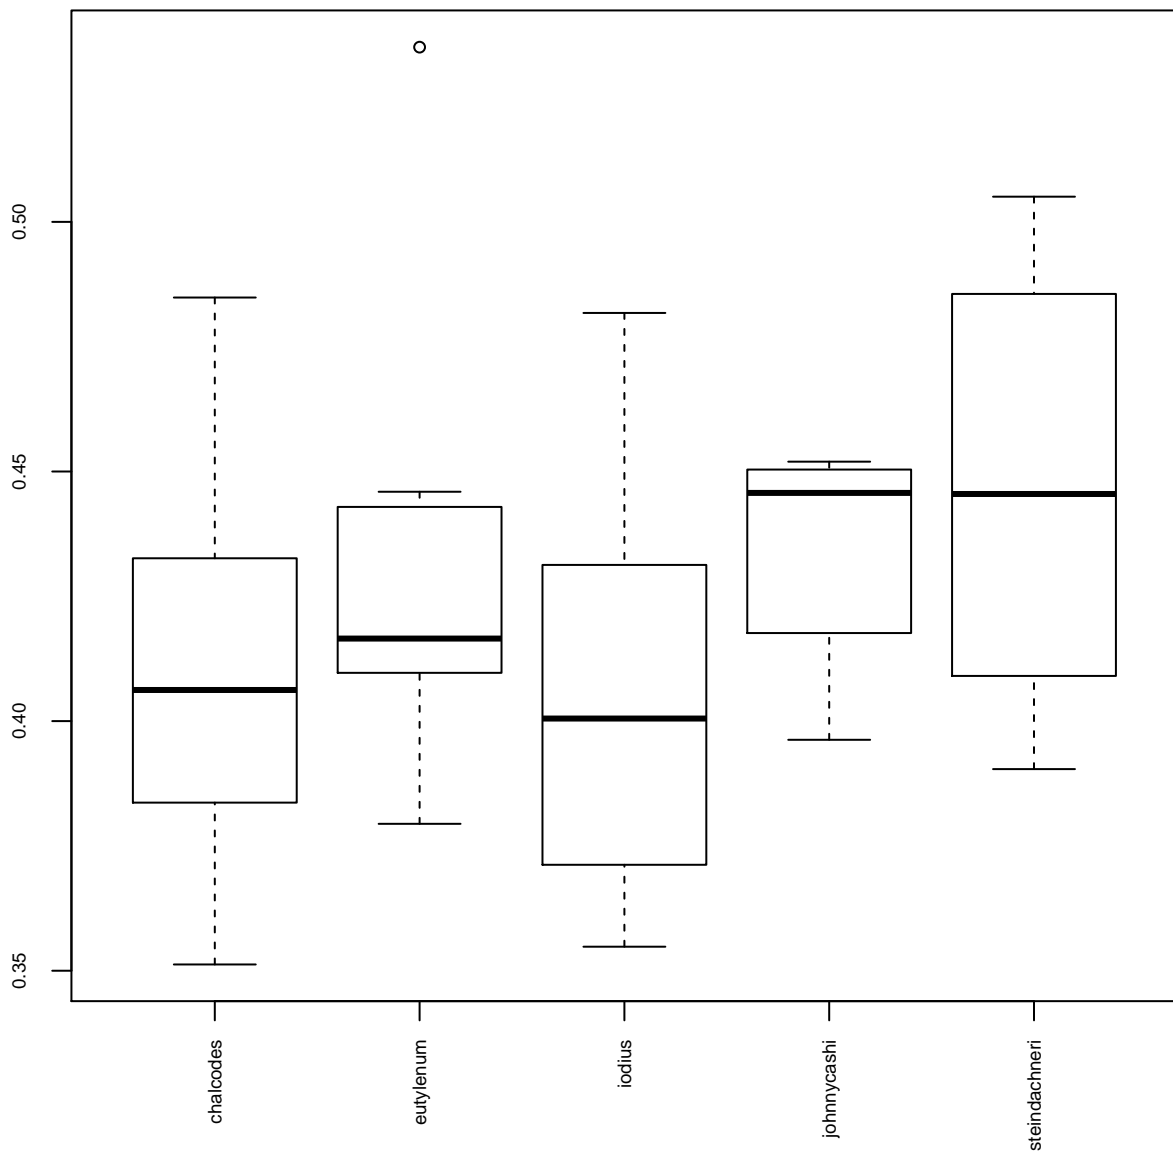

Supplement: Supplementary file 1065

## Patella 3/Tibia 3 ratio – males

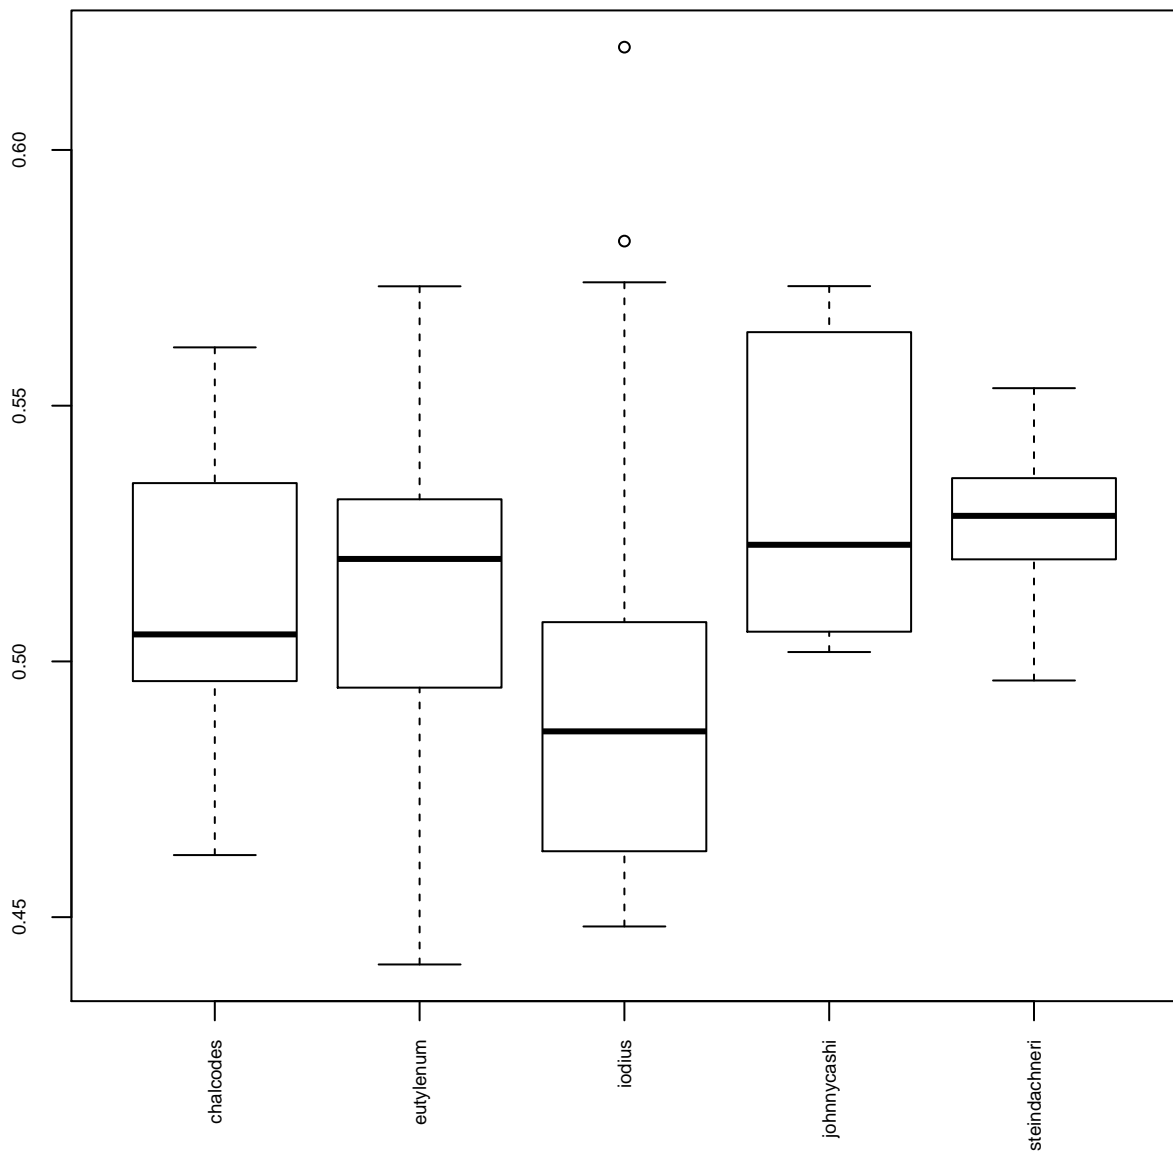

Supplement: Supplementary file 1066

## Leg 3/Leg 4 Length ratio – females

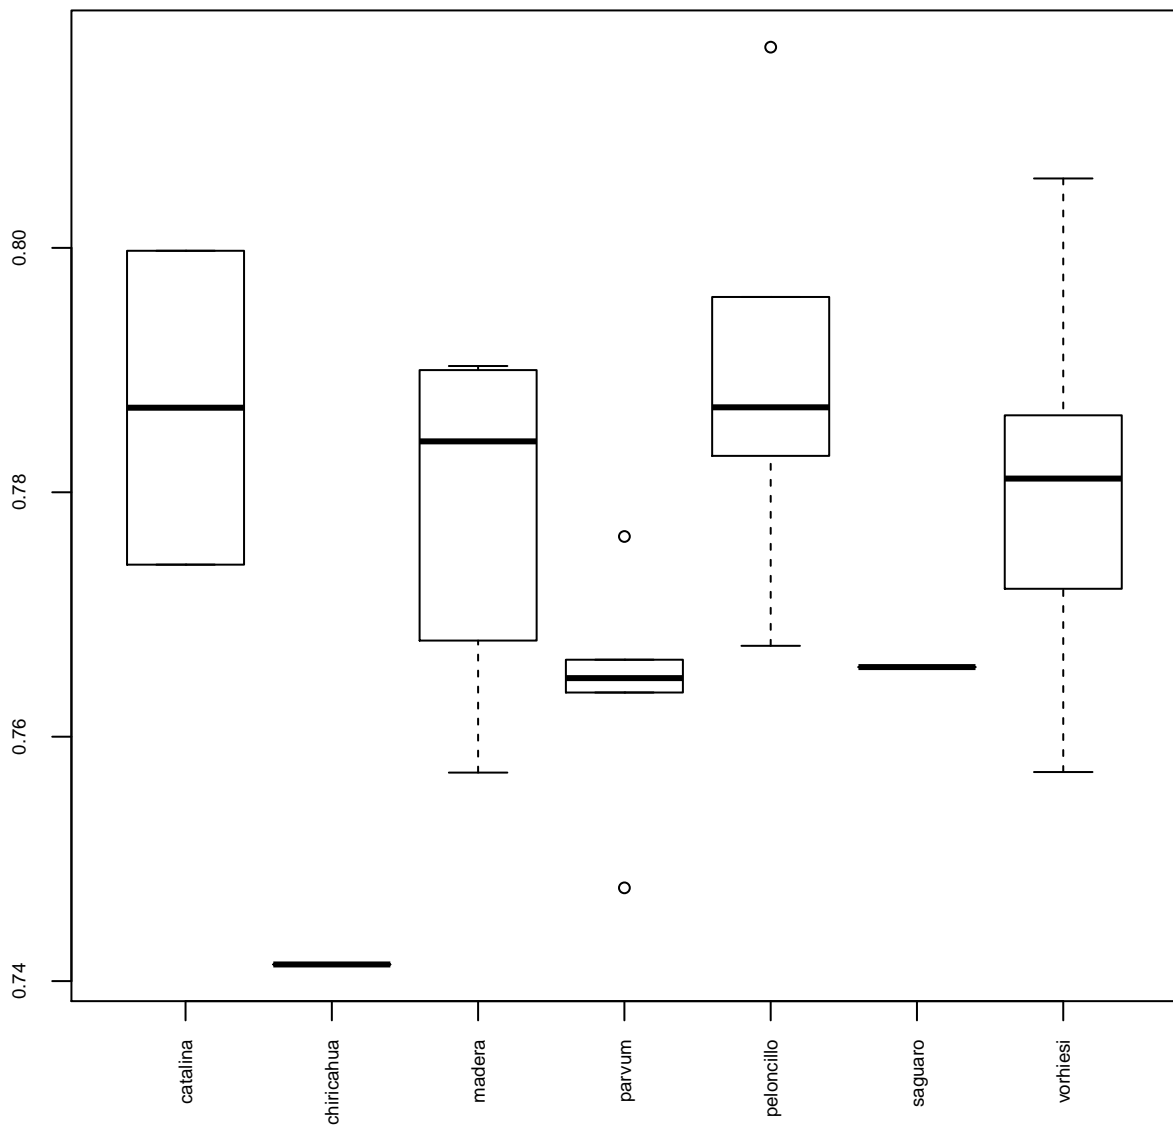

Supplement: Supplementary file 1067

## Tibia 1/Metatarsus 4 Length ratio – females

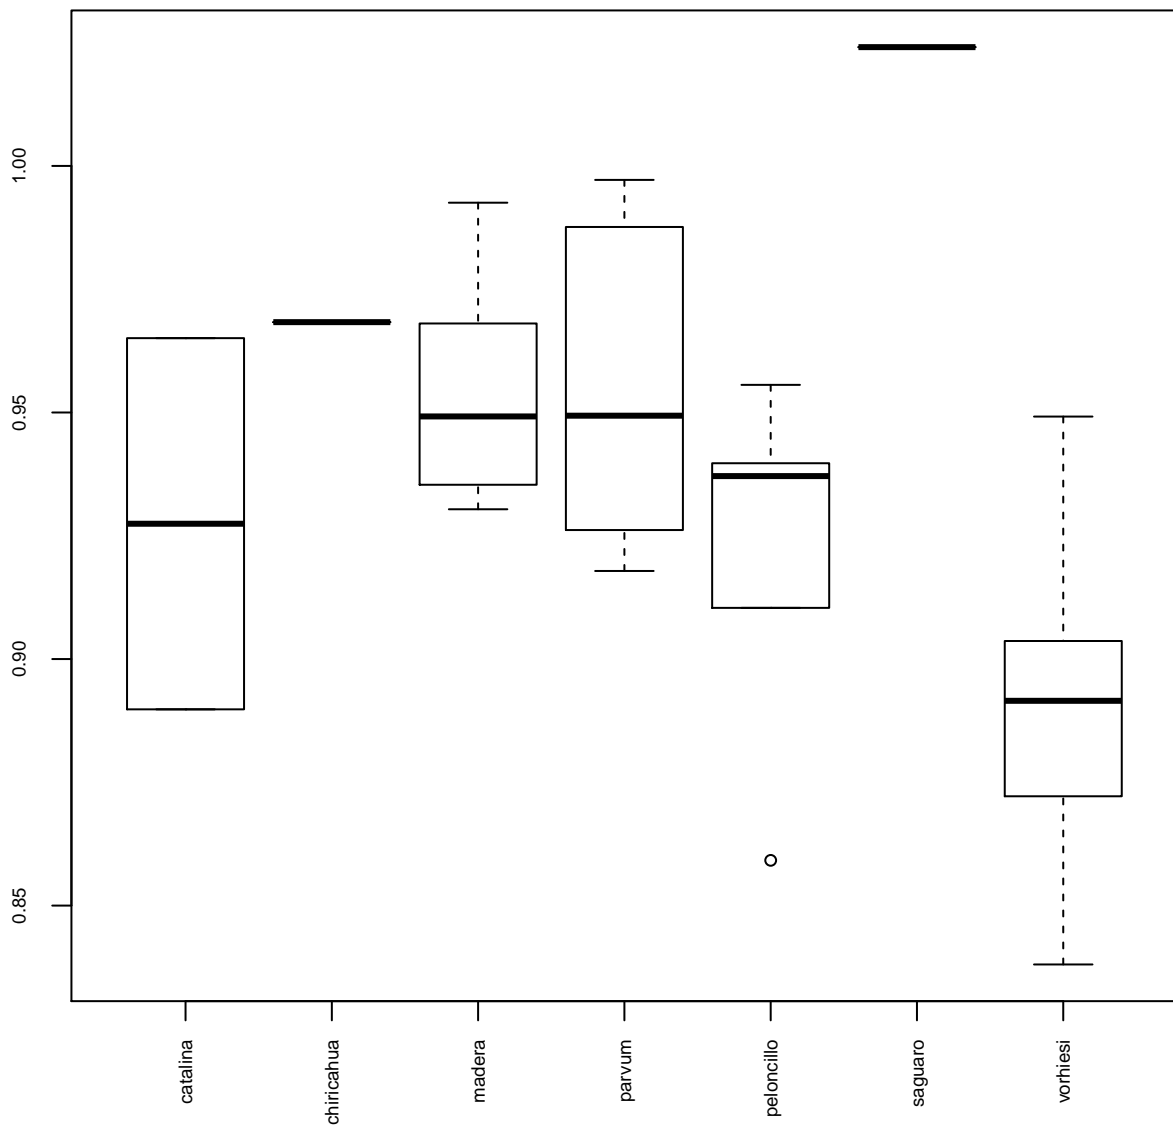

Supplement: Supplementary file 1068

## Tibia 1/Patella 4 Length ratio – males

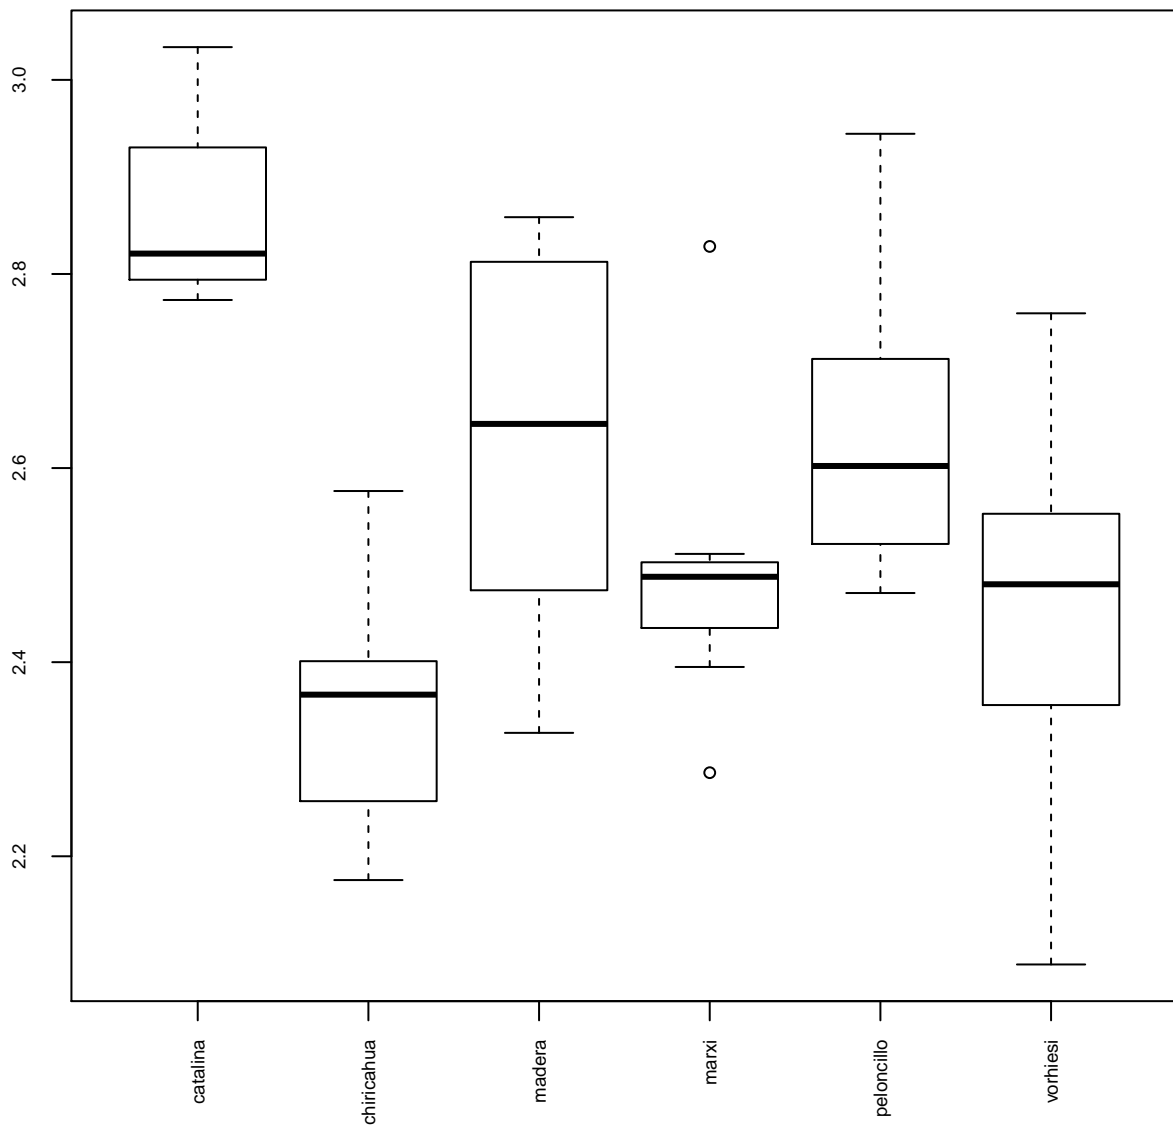

Supplement: Supplementary file 1069

## Patella 1/Tibia 1 ratio – females

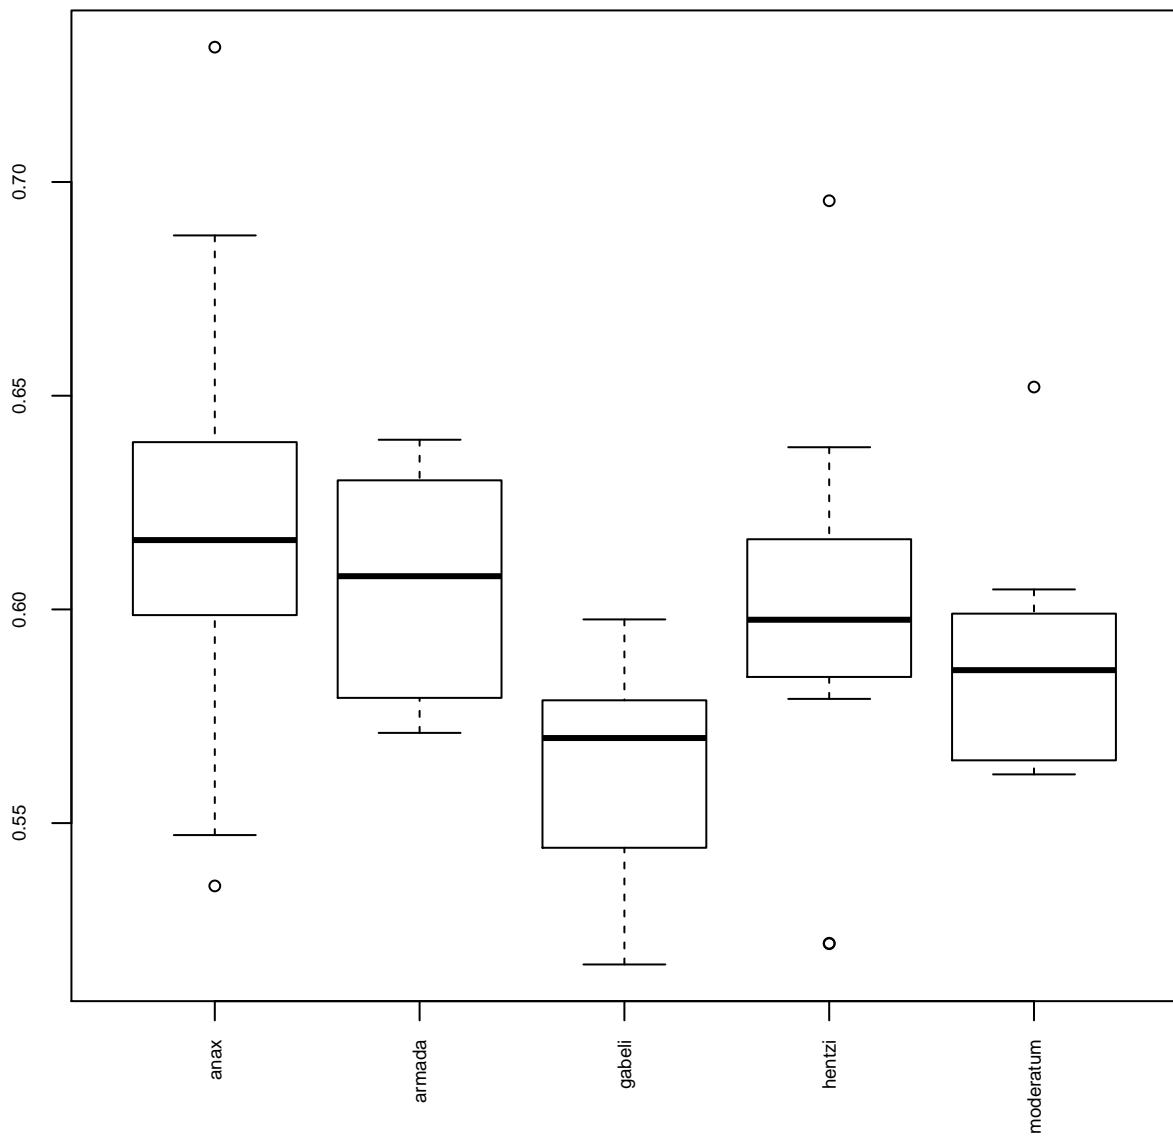

Supplement: Supplementary file 1070

## Tibia 1/Metatarsus 1 ratio – males

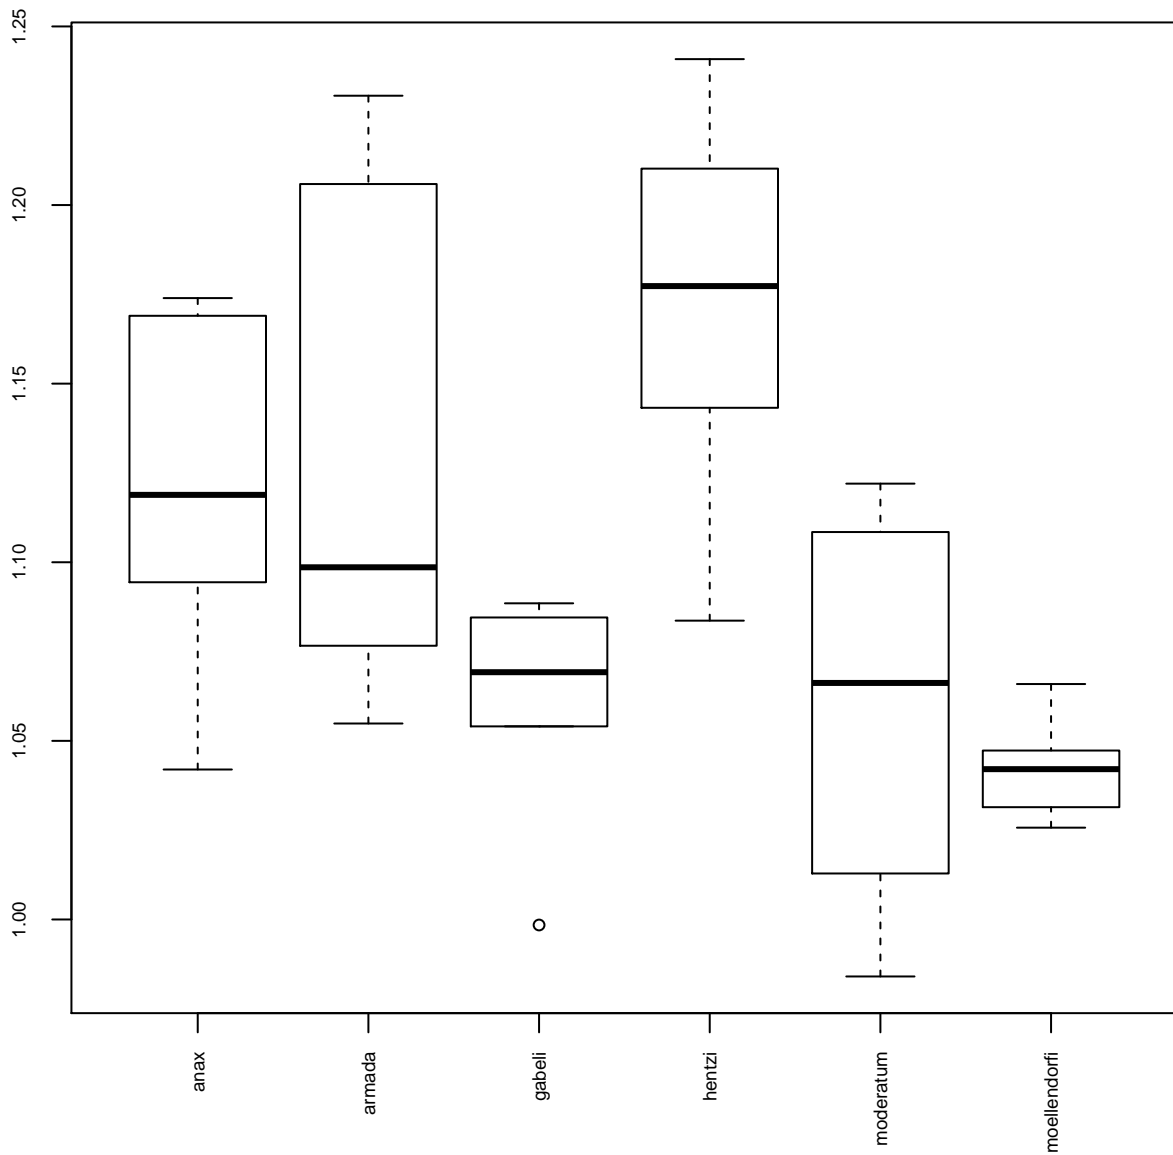

Supplement: Supplementary file 1071

## Tibia 1/Metatarsus 4 Length ratio – females

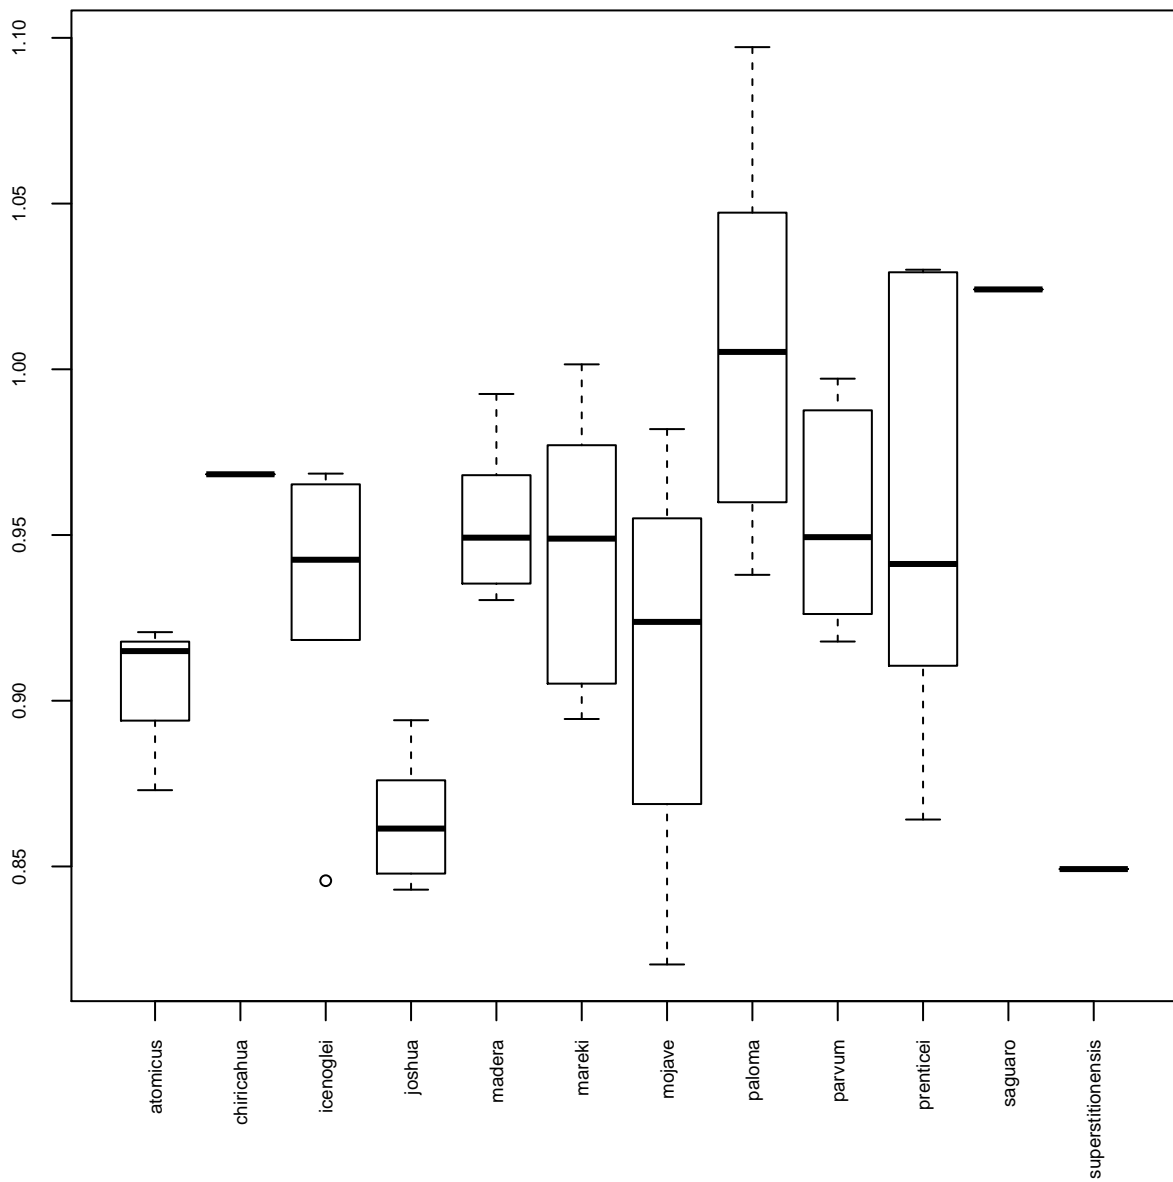

Supplement: Supplementary file 1072

## Carapace Length/Metatarsus 3 ratio – females

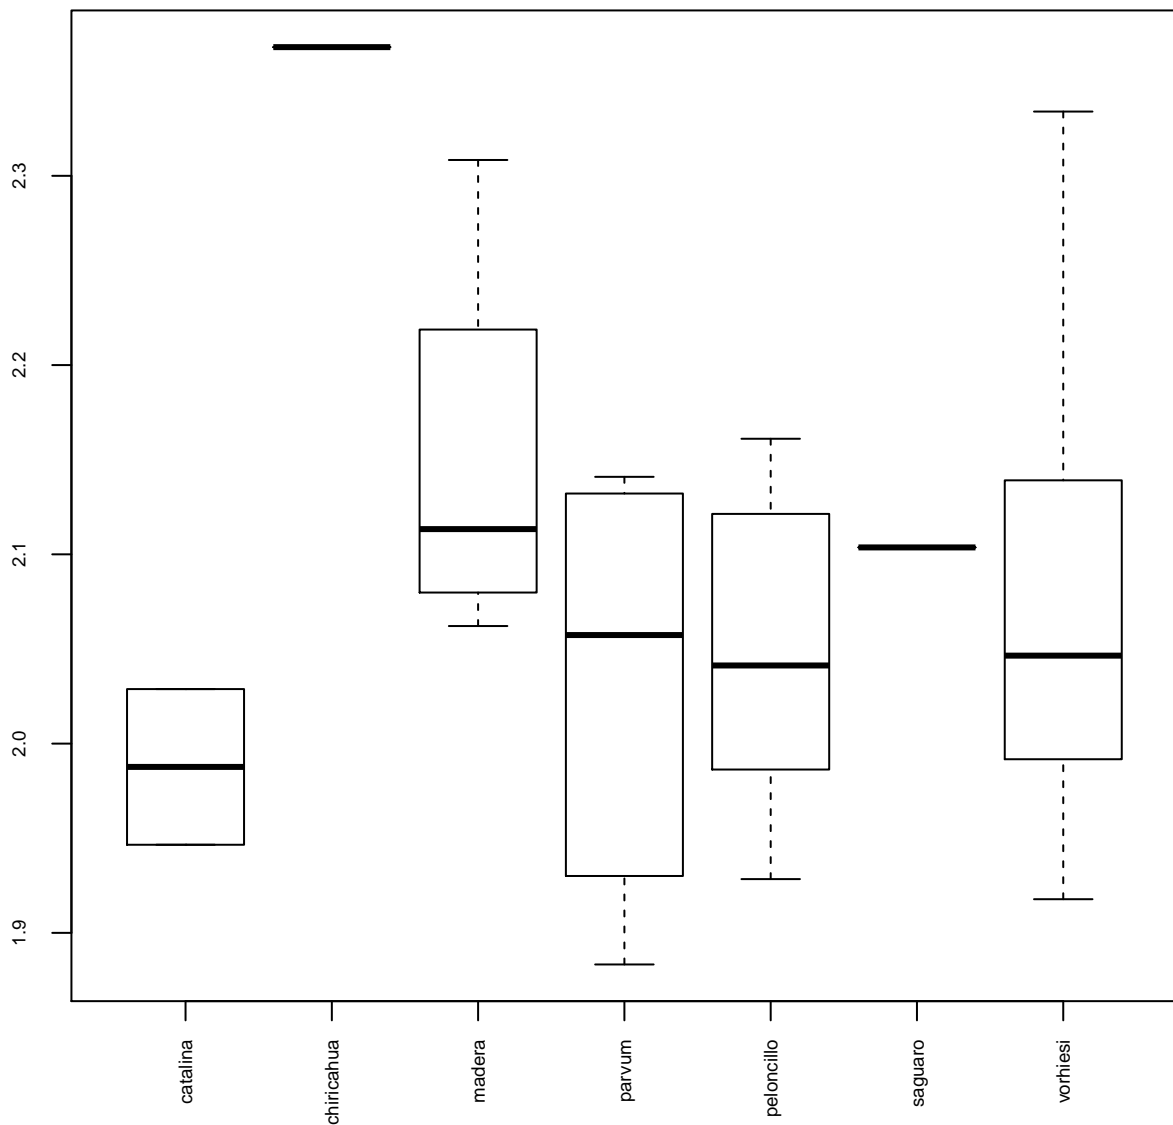

Supplement: Supplementary file 1073

## Patella 1/Femur 4 Length ratio – females

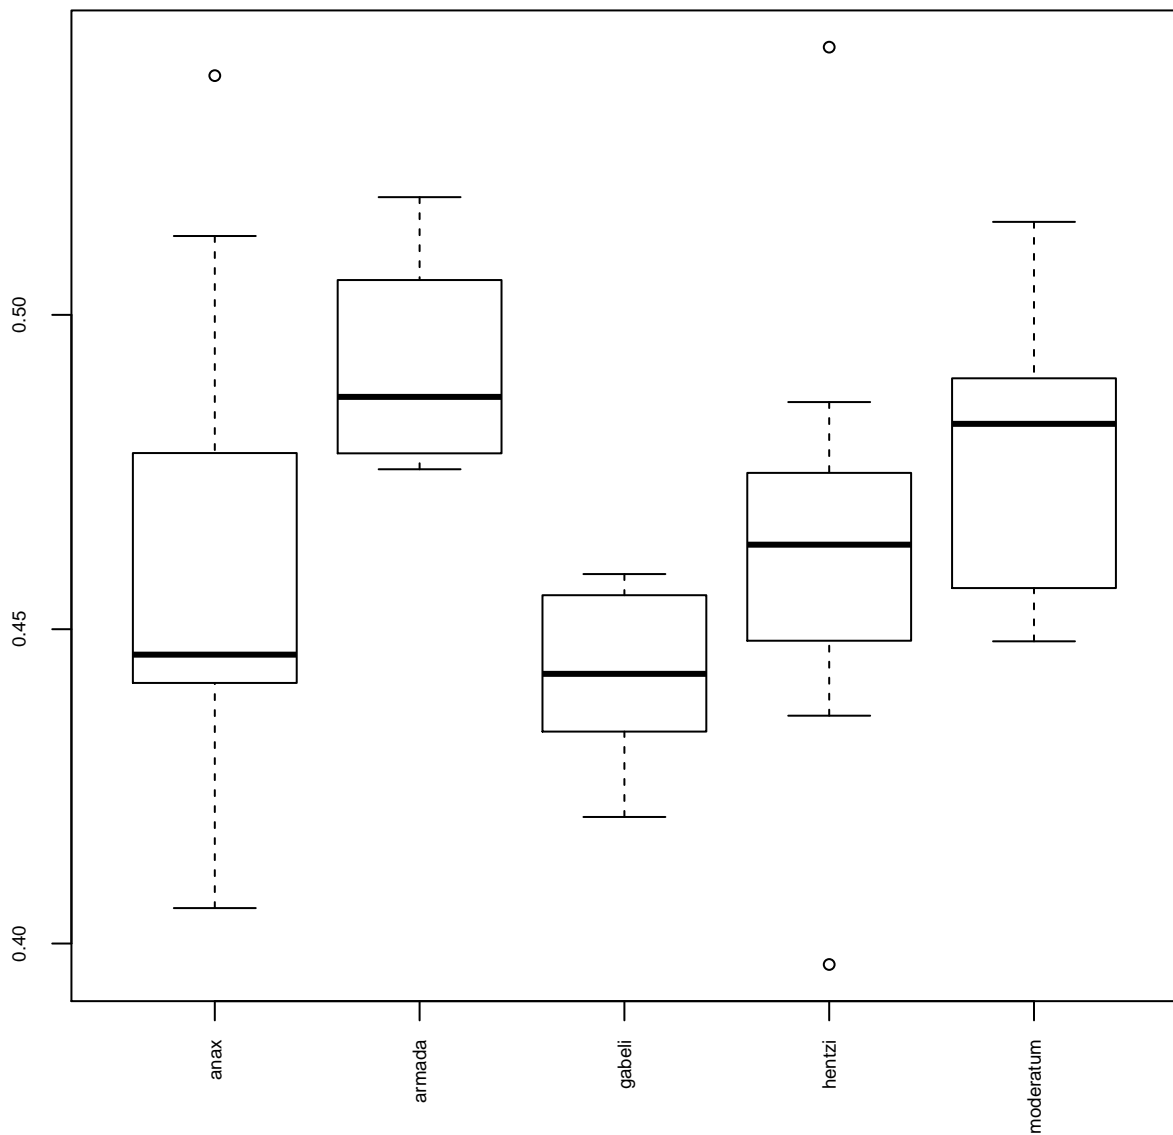

Supplement: Supplementary file 1074

## Tarsus 3/Femur 4 Length ratio – females

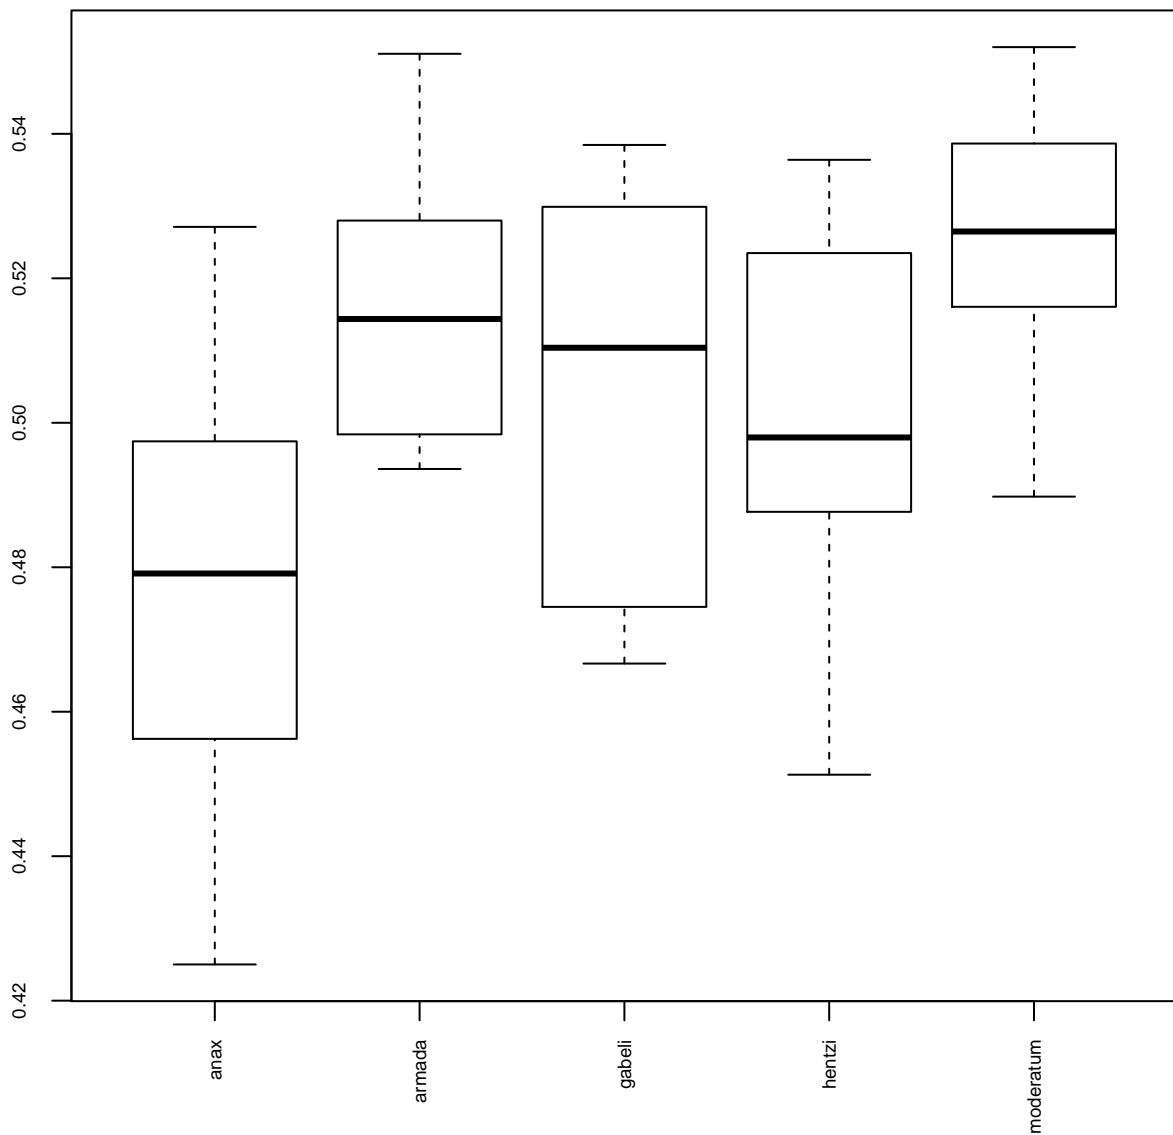

Supplement: Supplementary file 1075

## Palpal Tibia/Tibia 4 Length ratio – males

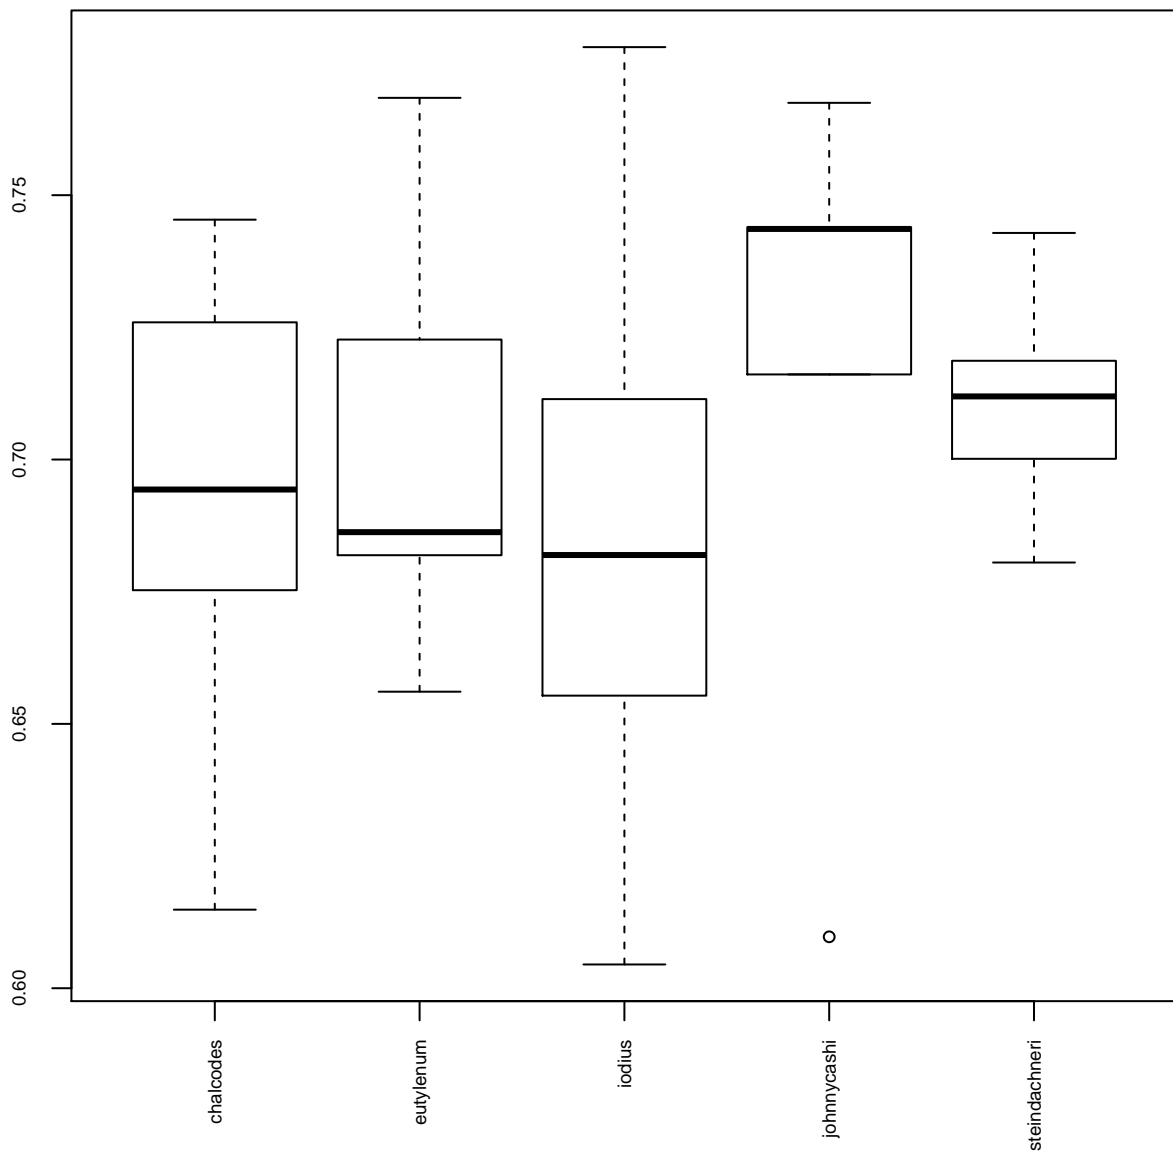

Supplement: Supplementary file 1076

## Tarsus 1/Femur 4 Length ratio – males

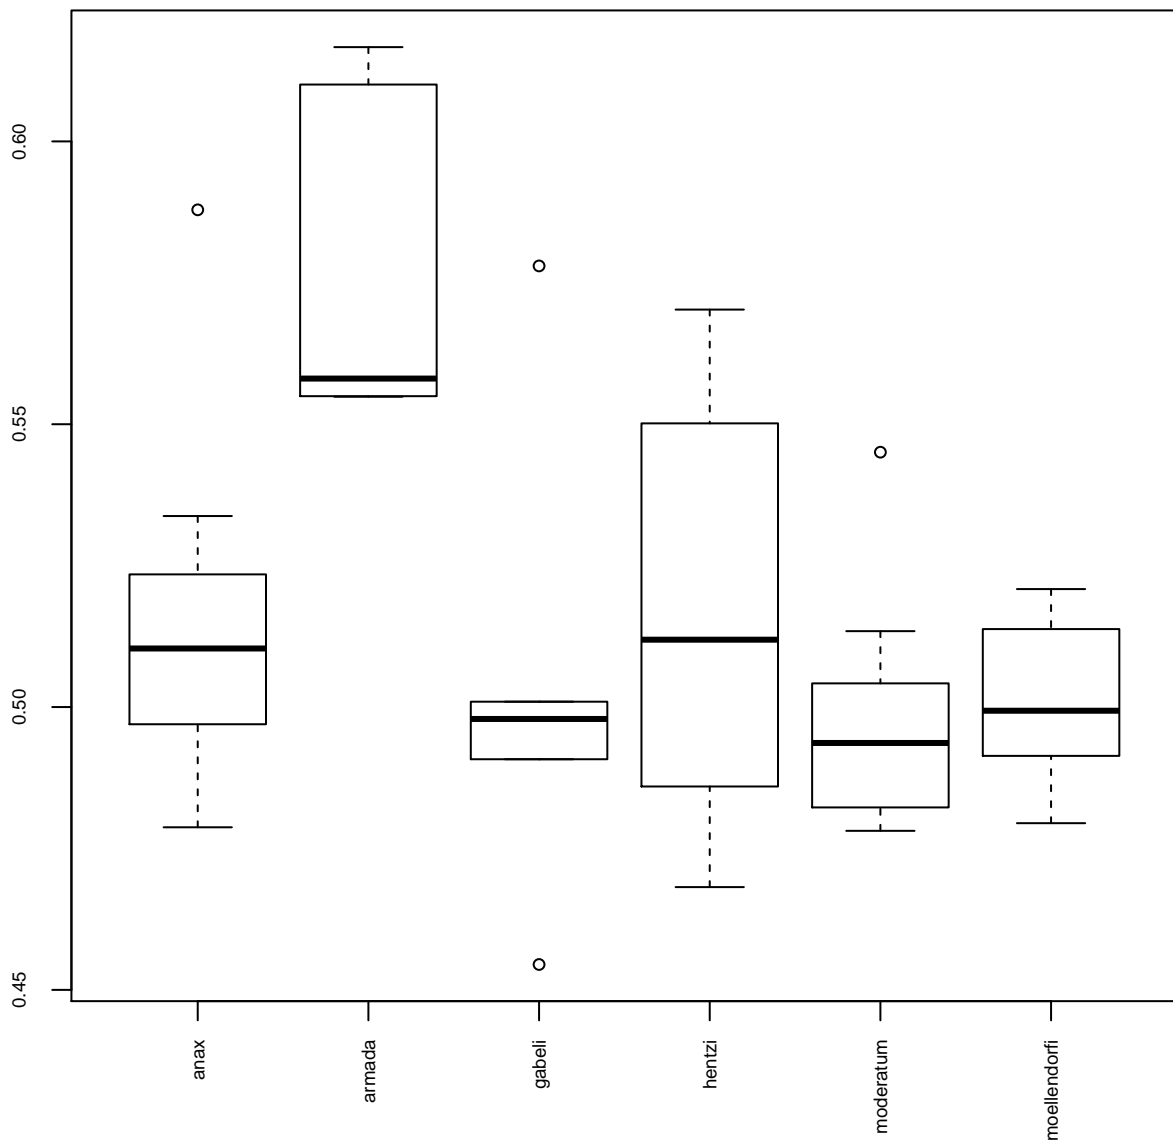

Supplement: Supplementary file 1077

# Tarsus 3/Tibia 4 Length ratio – females

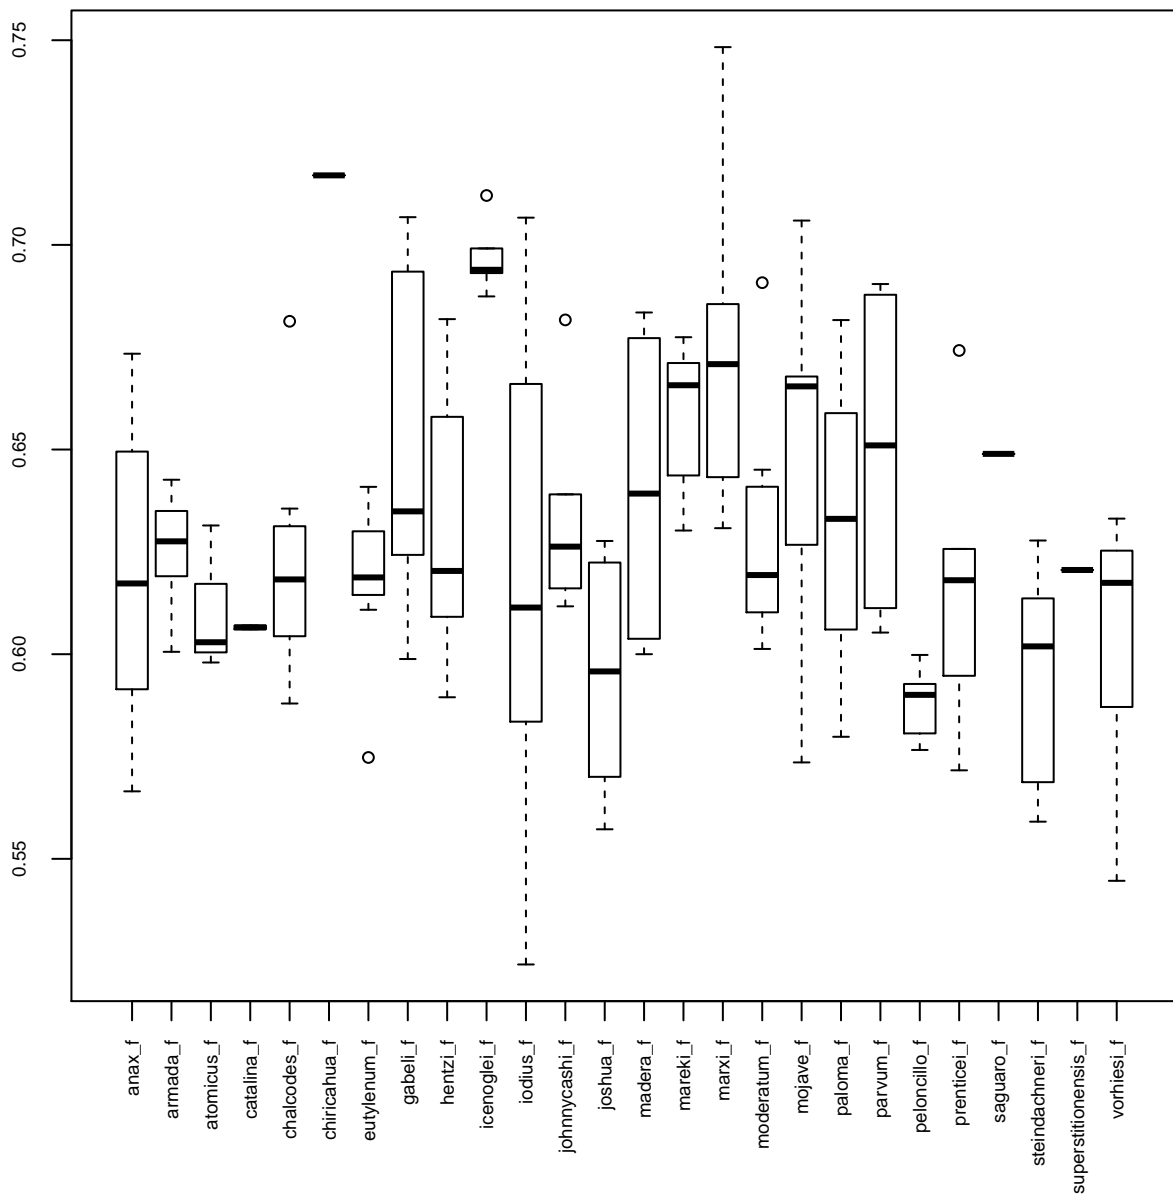

Supplement: Supplementary file 1078

## Femur 1/Metatarsus 3 ratio – males

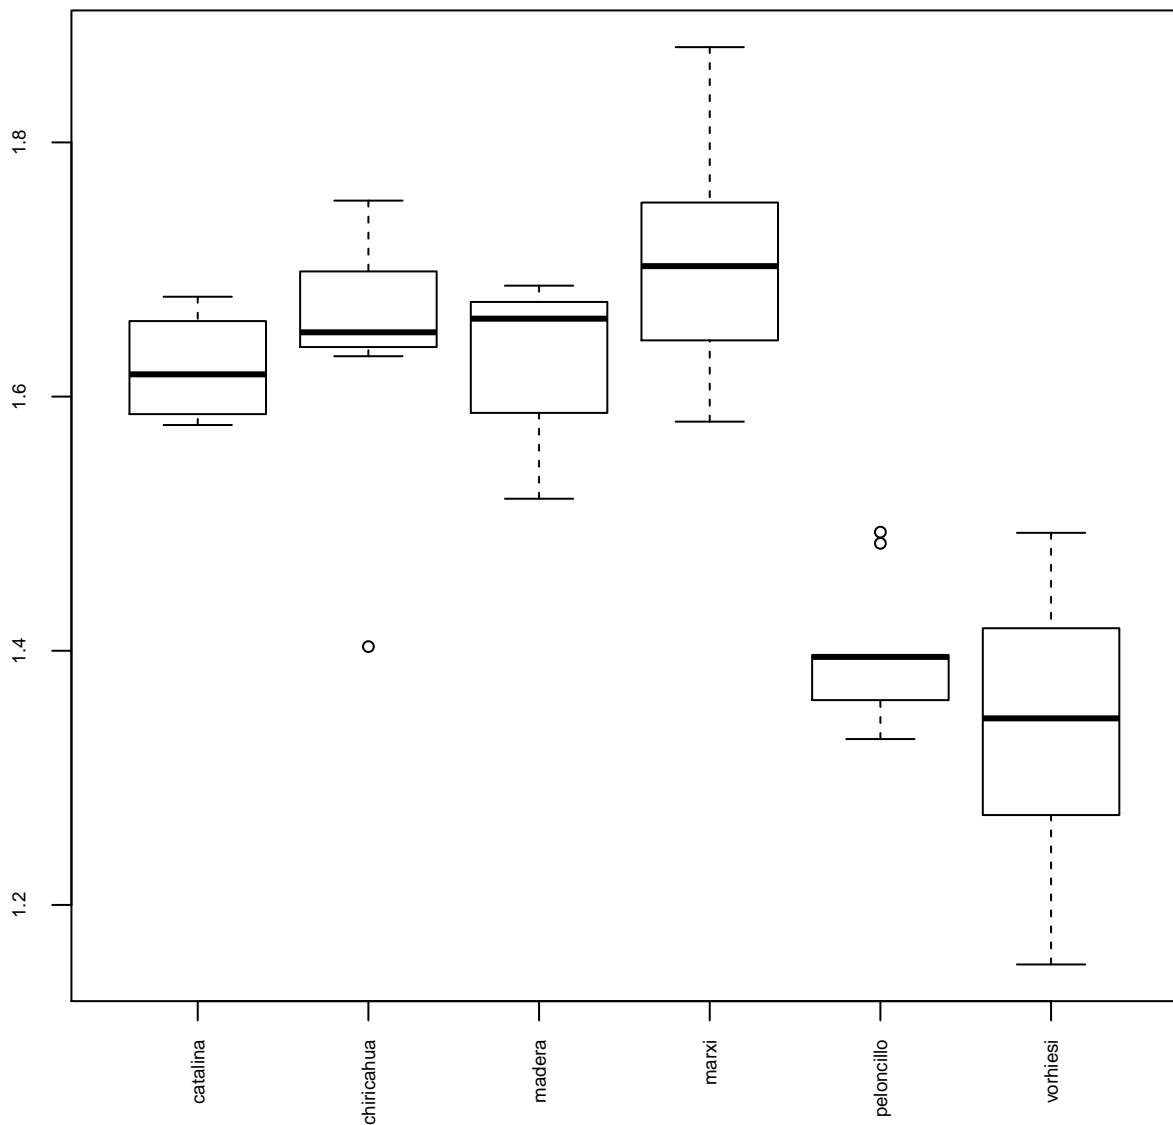

Supplement: Supplementary file 1079

# Femur 1/Patella 4 ratio – males

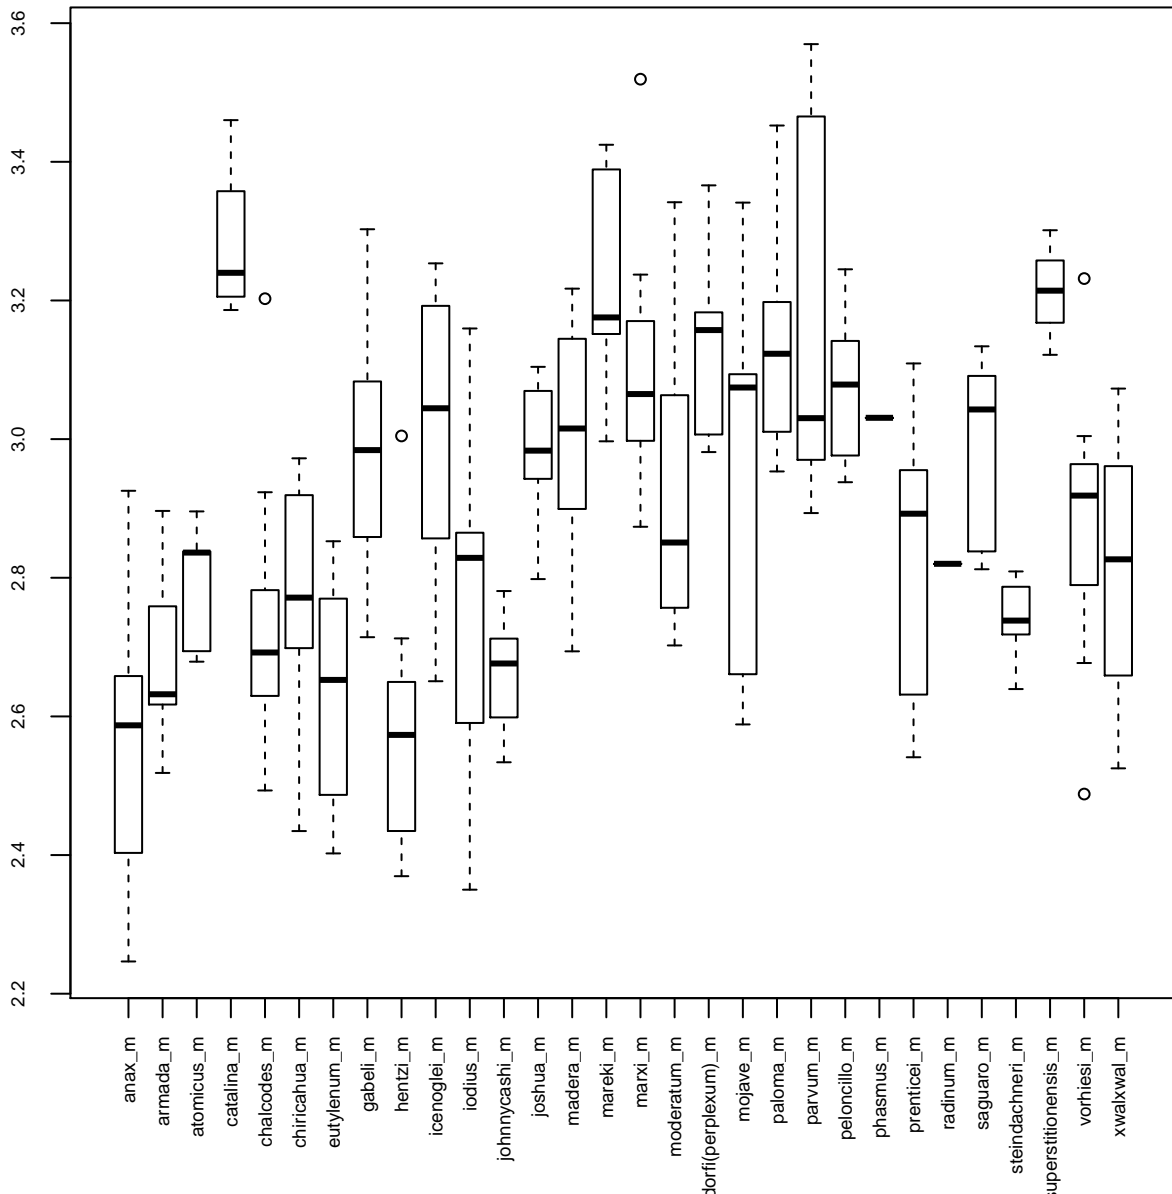

Supplement: Supplementary file 1080

# Palpal Tibia/Tibia 1 Length ratio – males

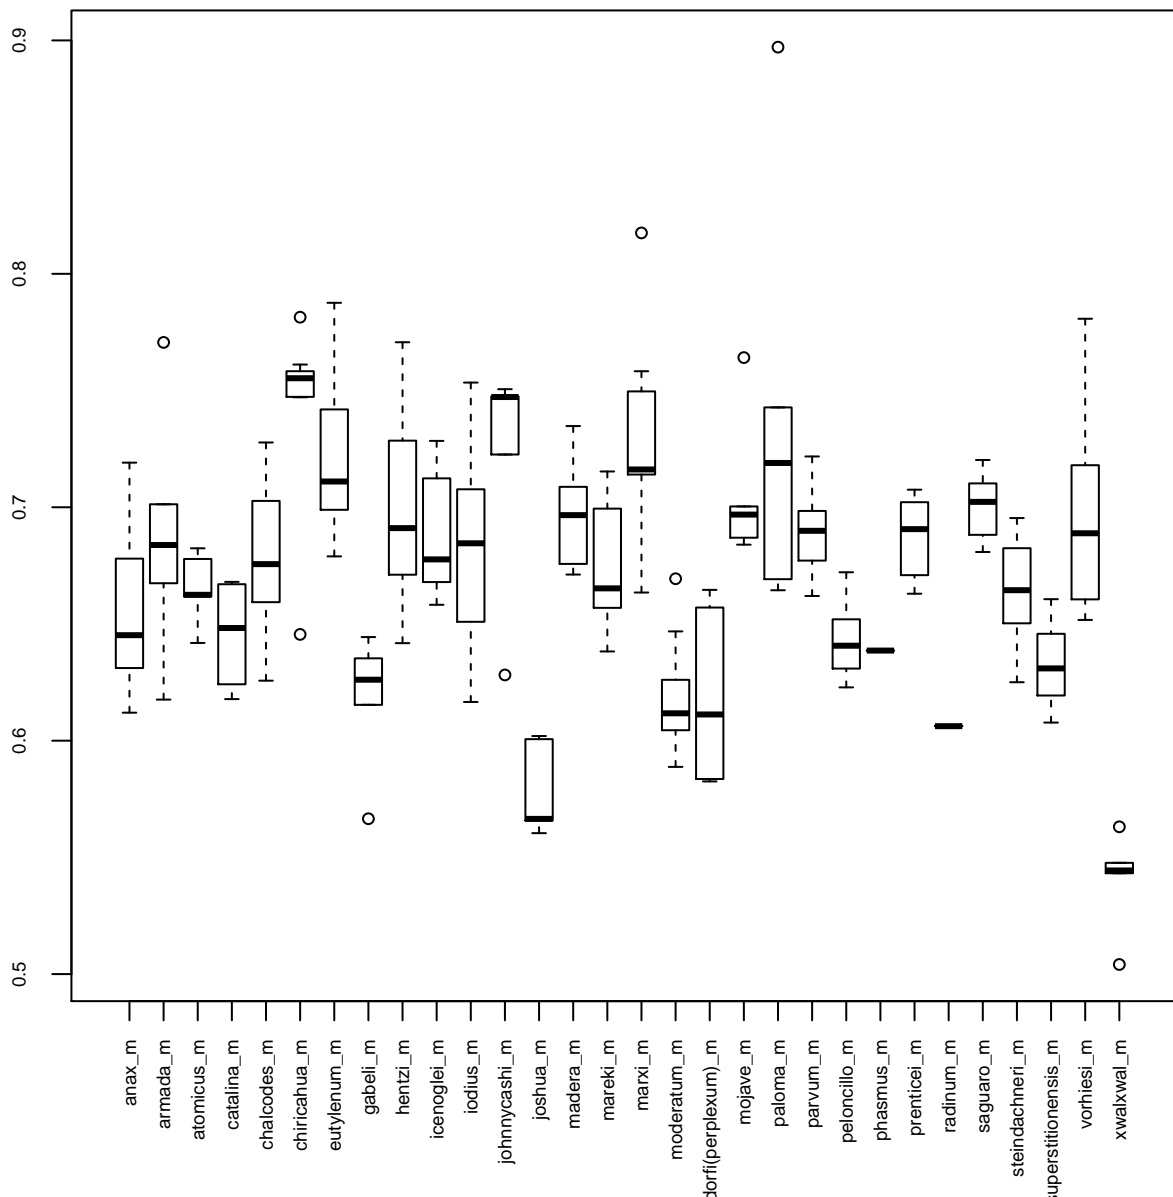

Supplement: Supplementary file 1081

## Metatarsus 1/Tarsus 3 Length ratio – females

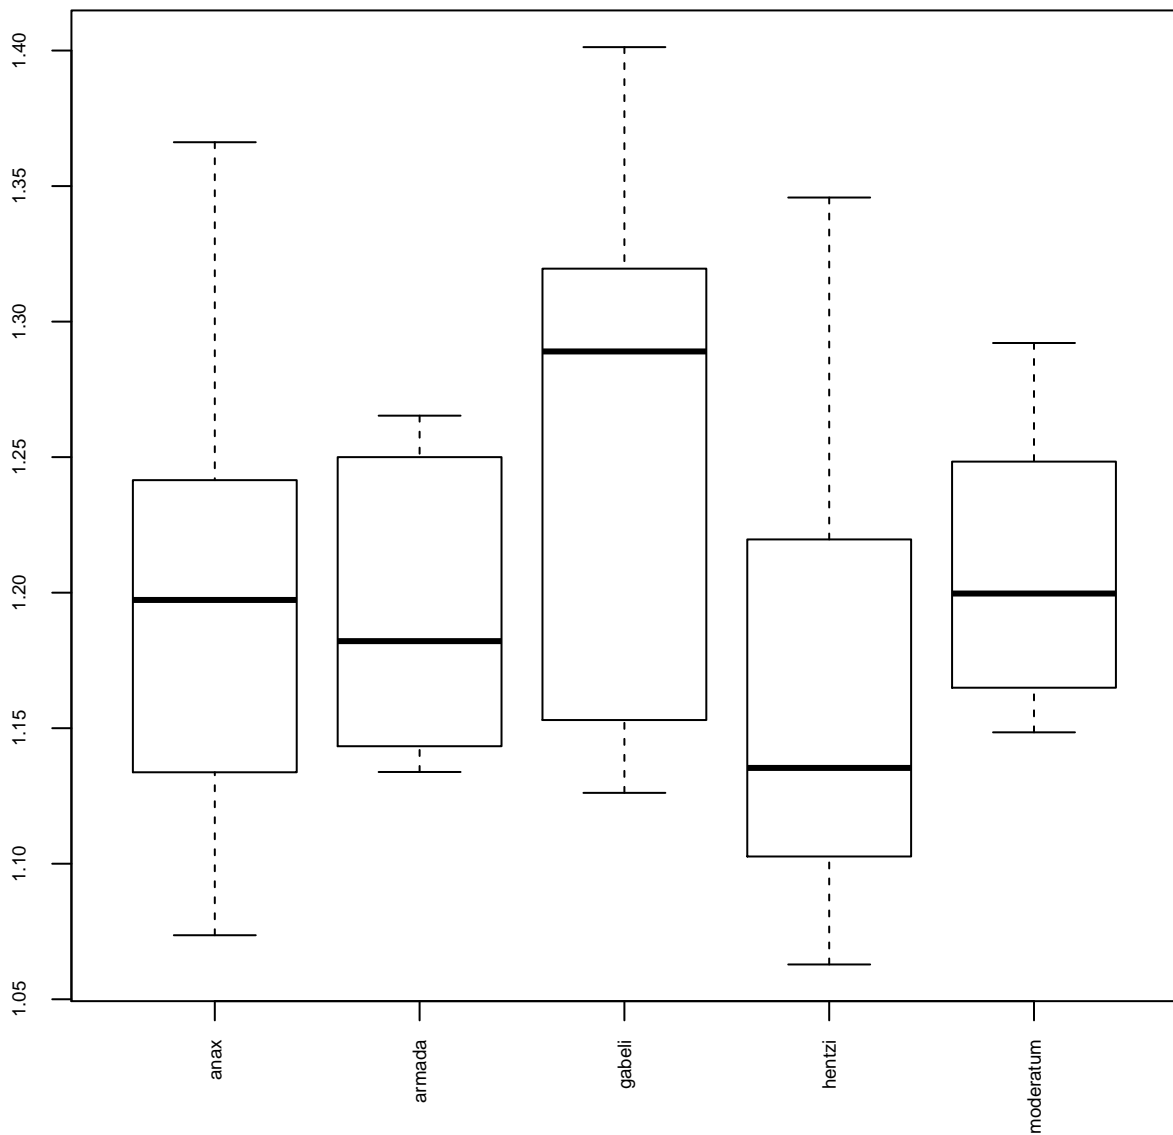

Supplement: Supplementary file 1082

# Palpal Tibia/Femur 3 Length ratio – males

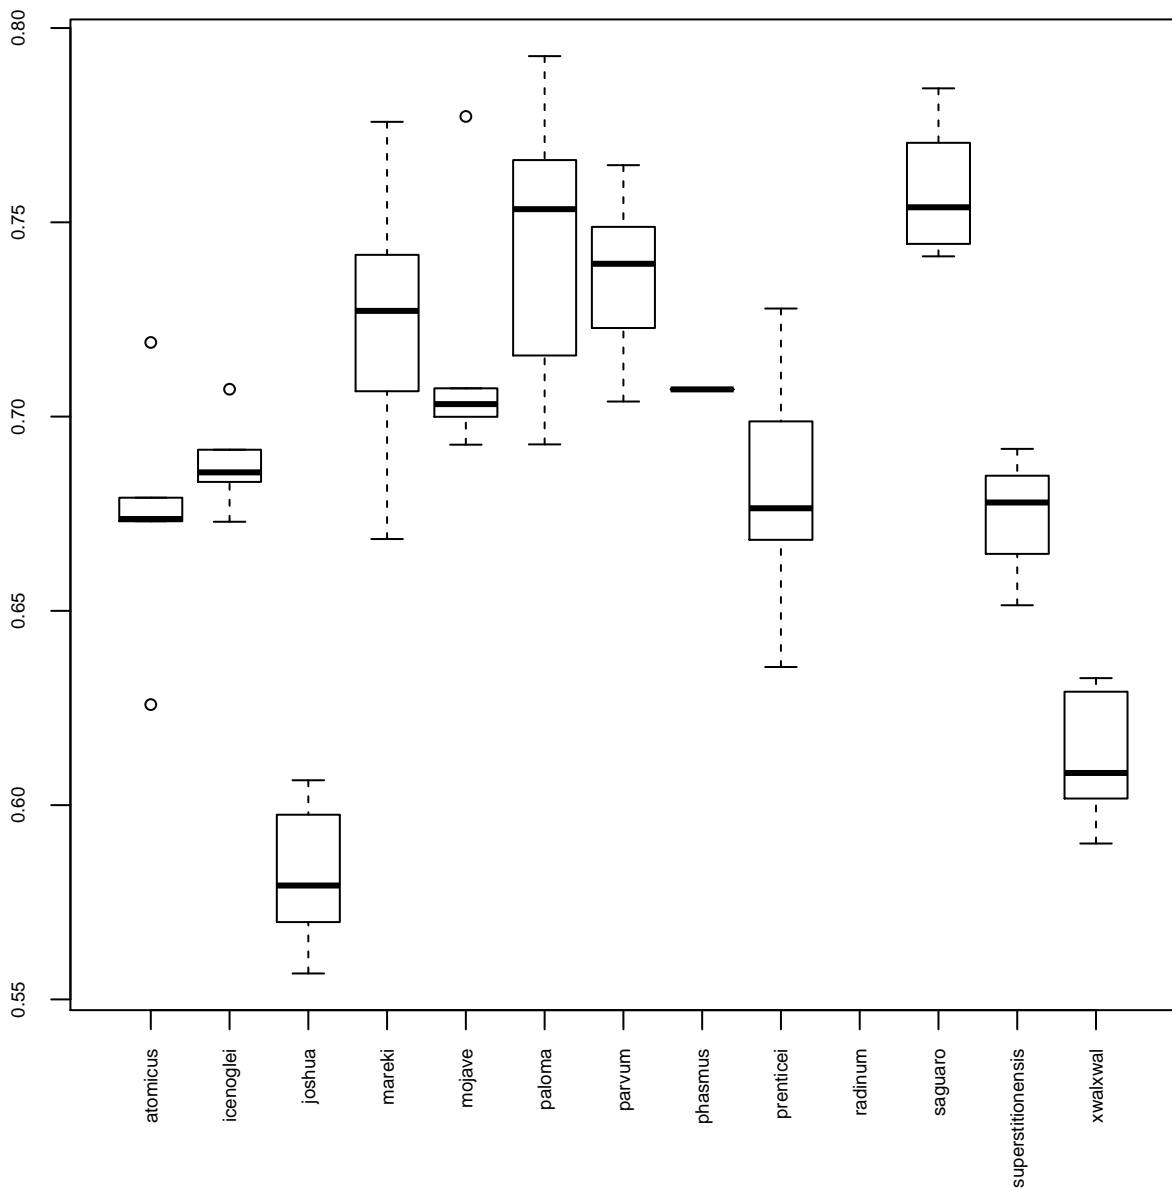

Supplement: Supplementary file 1083

## Femur 4/Tibia 4 ratio – females

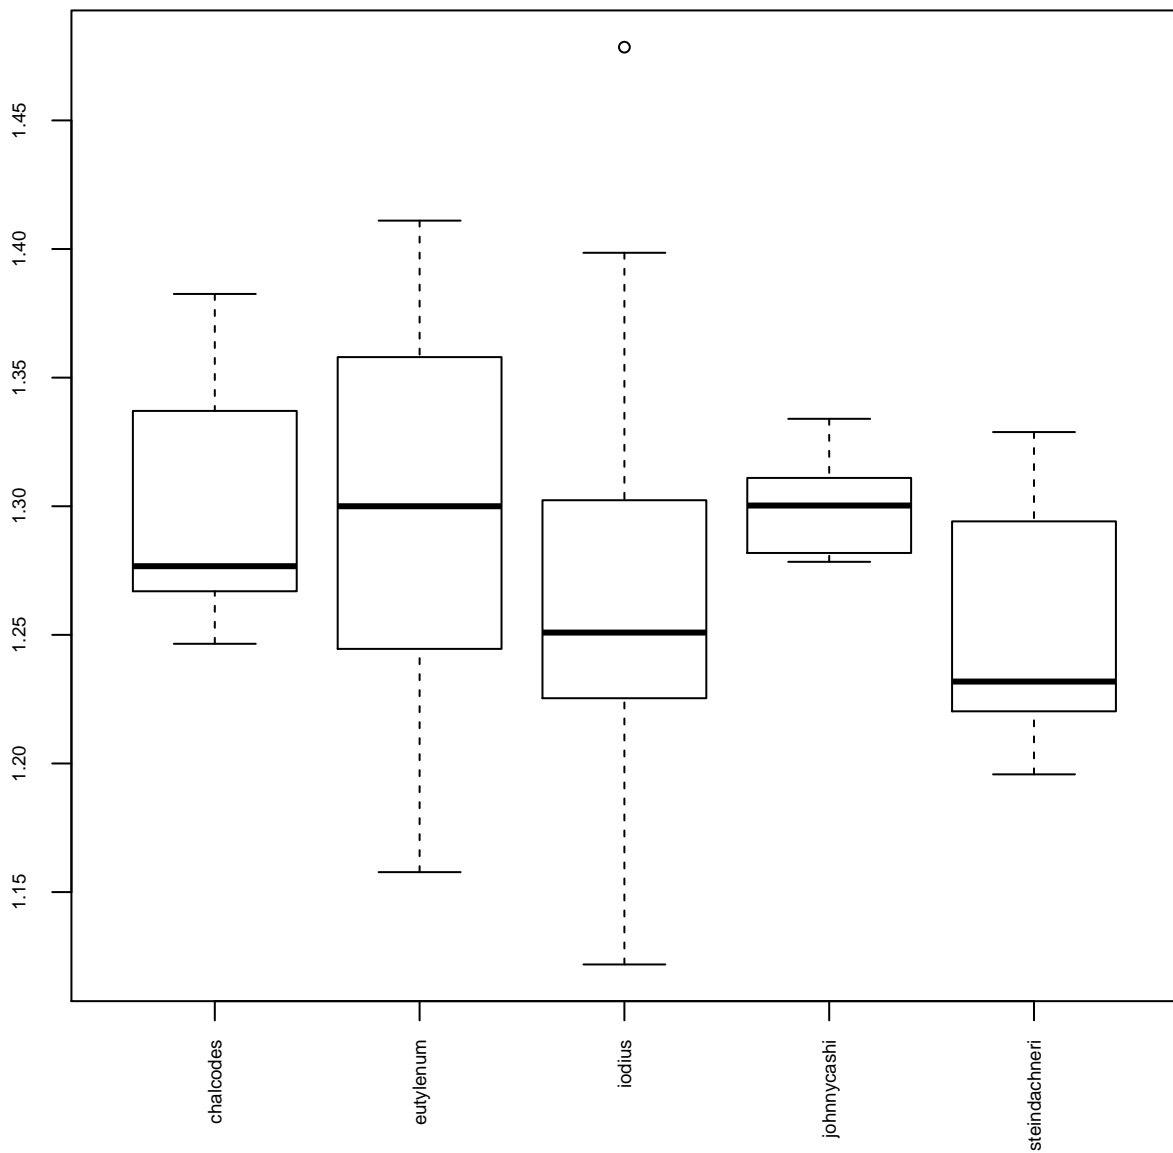

Supplement: Supplementary file 1084

# Tibia 3/Metatarsus 4 Length ratio – females

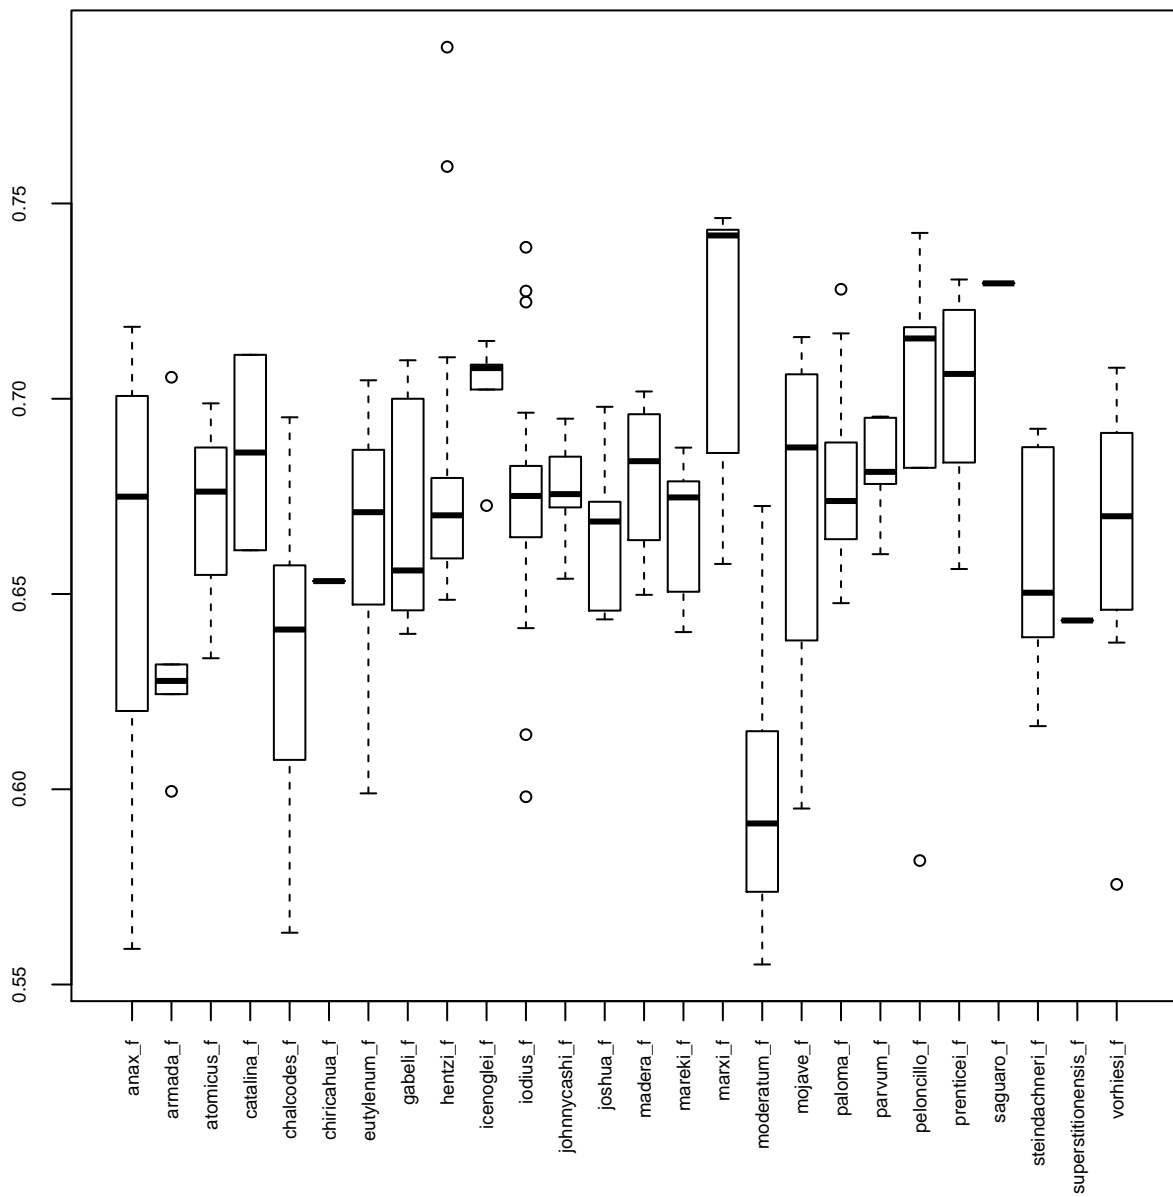

Supplement: Supplementary file 1085

## Patella 4/Tarsus 4 ratio – males

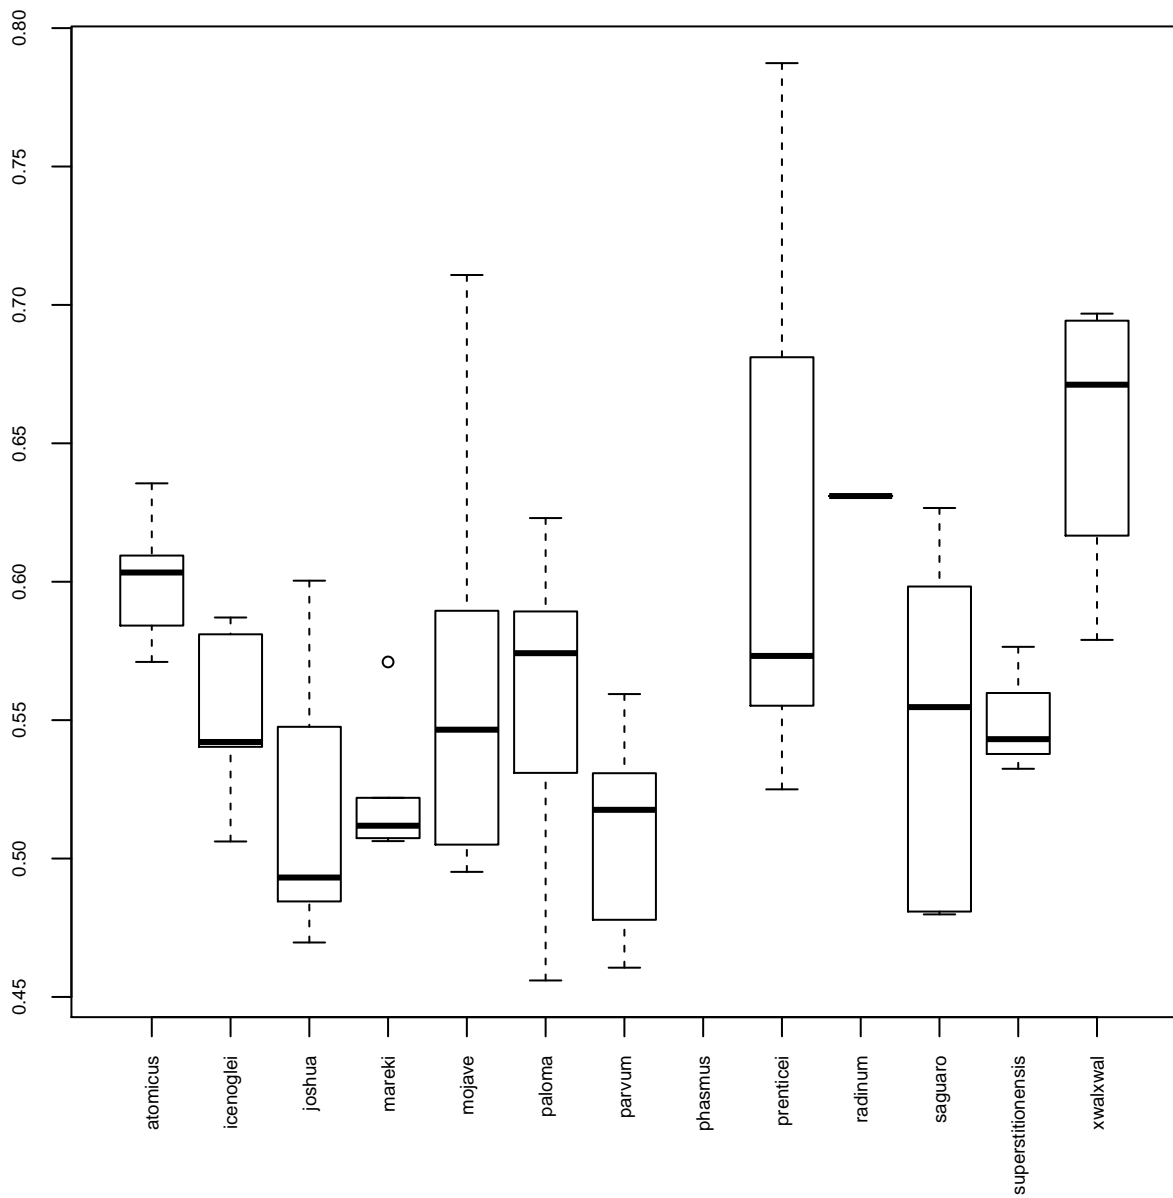

Supplement: Supplementary file 1086

## Tibia 1/Patella 3 Length ratio – males

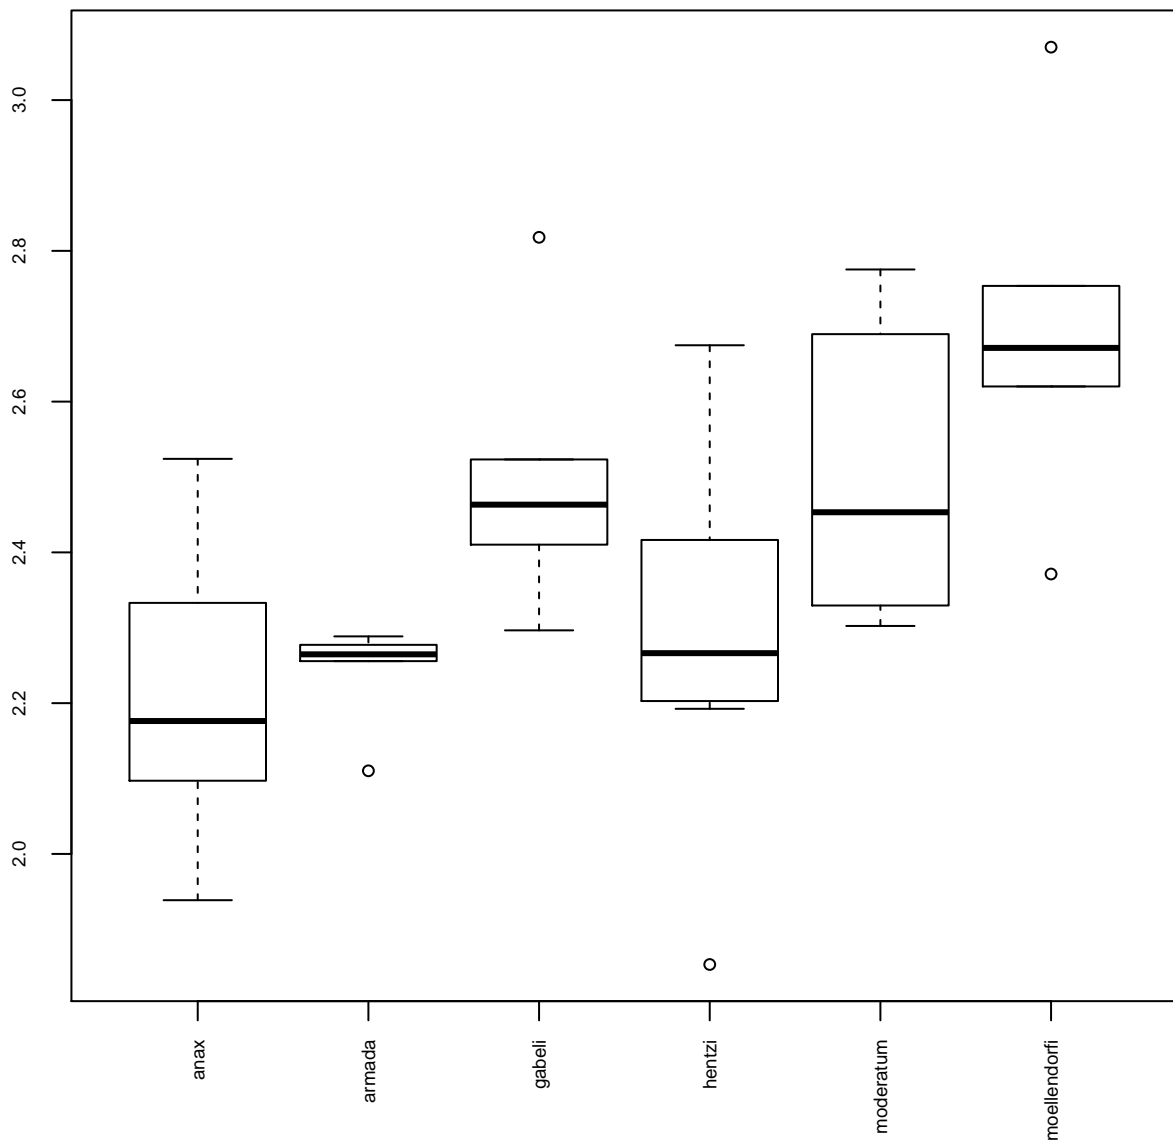

Supplement: Supplementary file 1087

# Femur 3/Patella 4 Length ratio – males

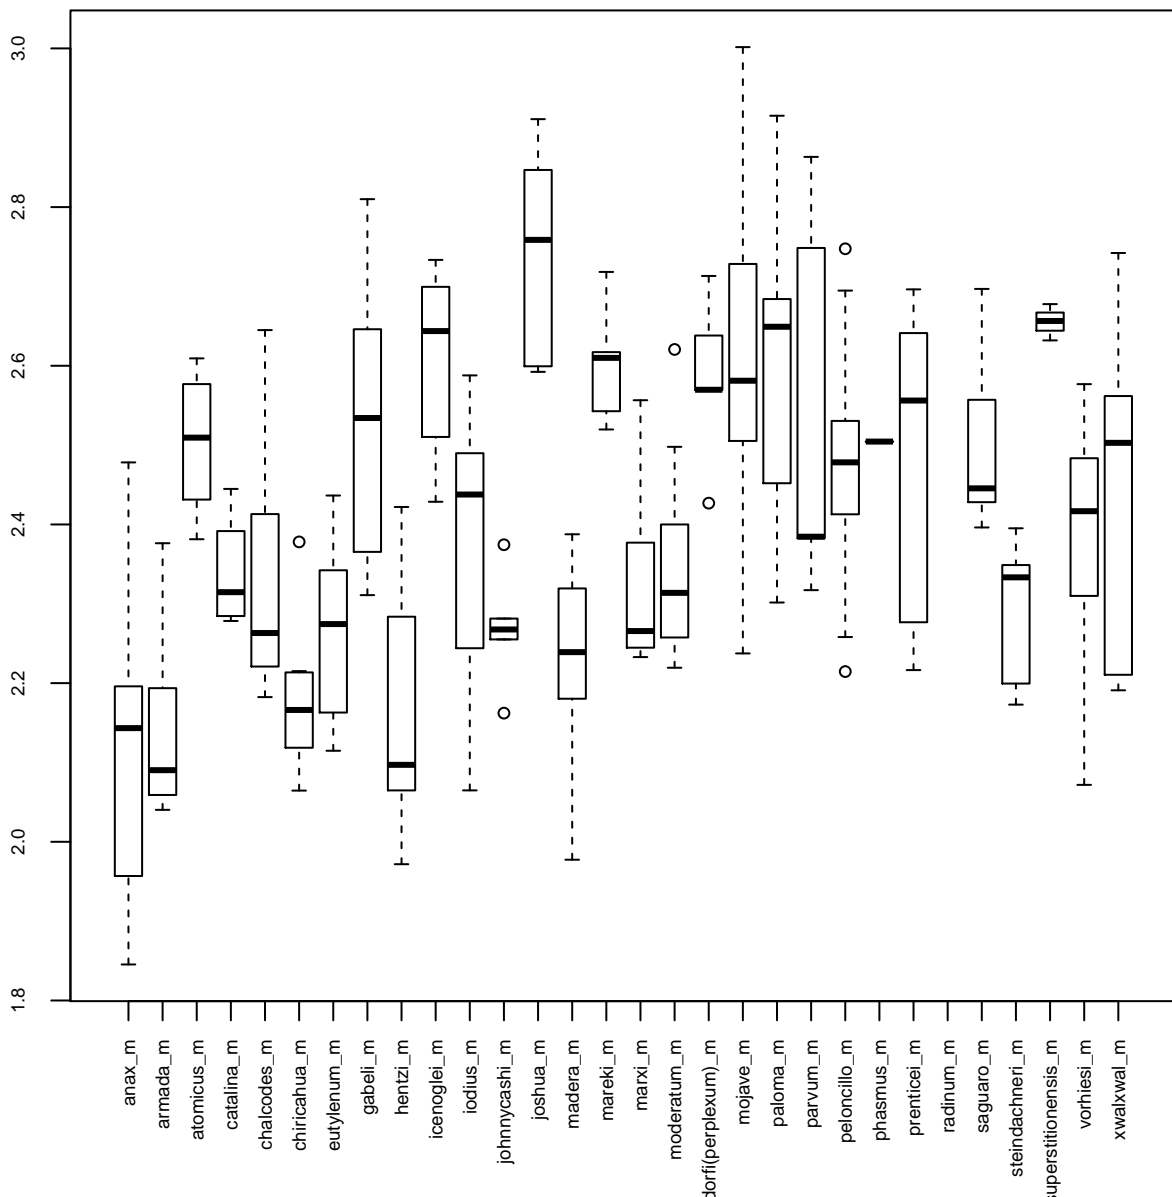

Supplement: Supplementary file 1088

## Patella 4/Tarsus 4 ratio – males

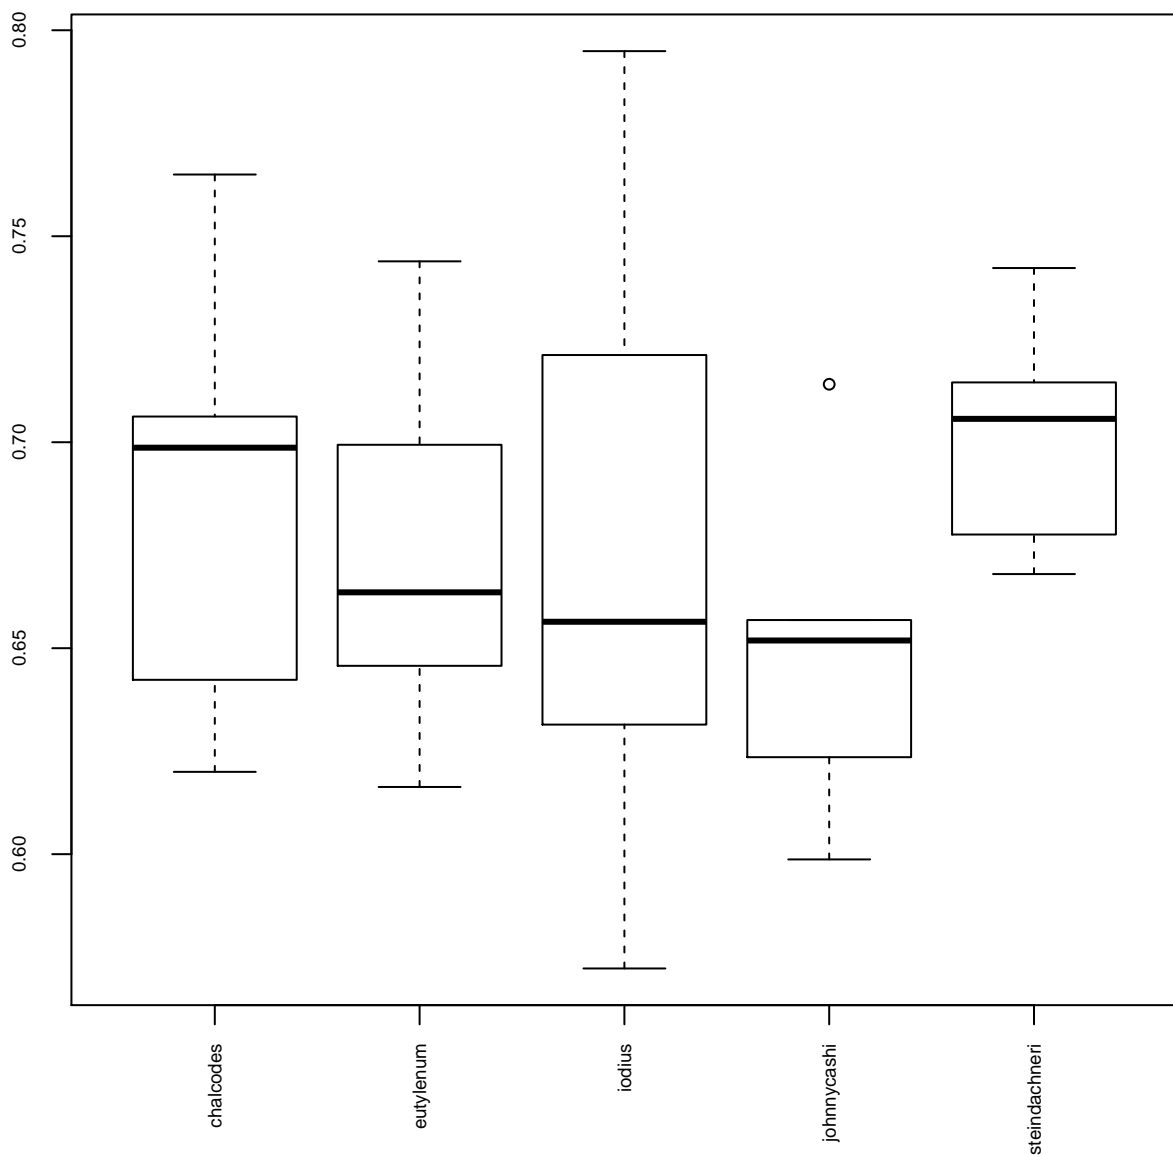

Supplement: Supplementary file 1089

## Tibia 4/Tarsus 4 ratio – females

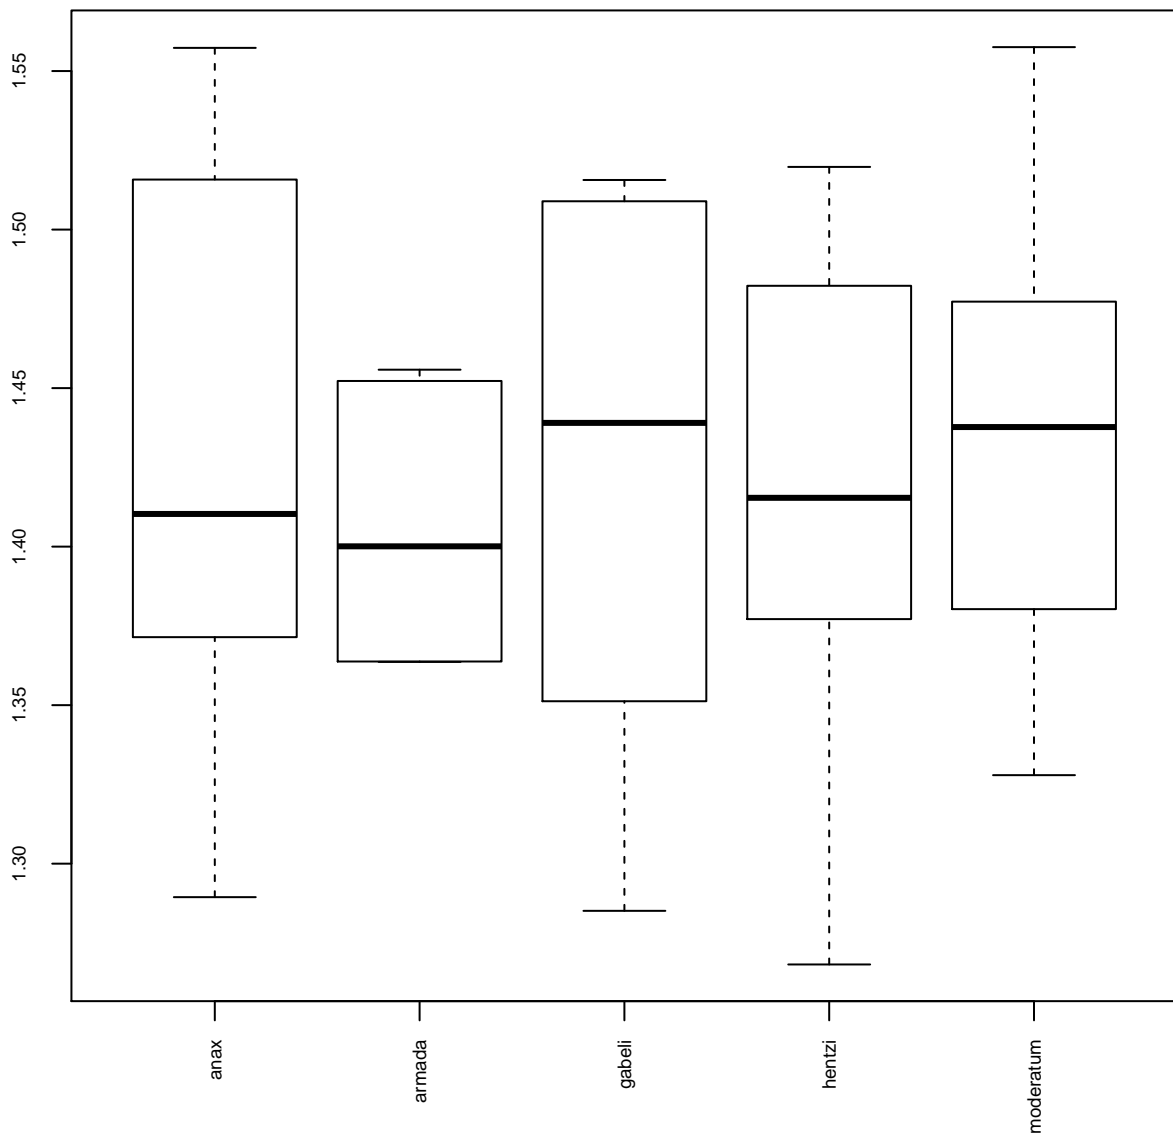

Supplement: Supplementary file 1090

## Tibia 1/Metatarsus 1 ratio – males

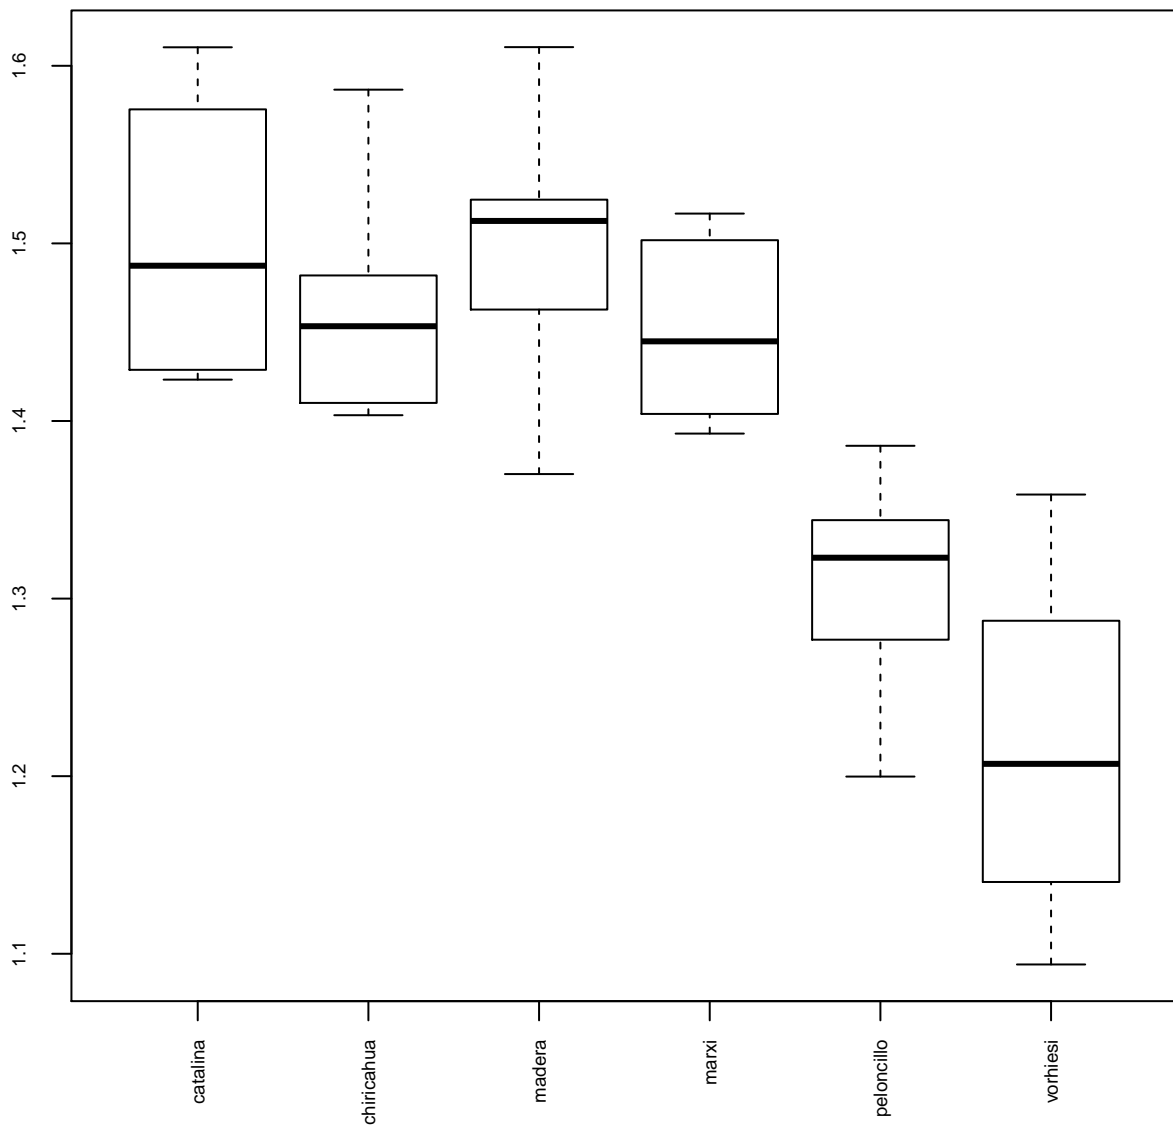

Supplement: Supplementary file 1091

# Leg 4 Length/Carapace Length ratio – males

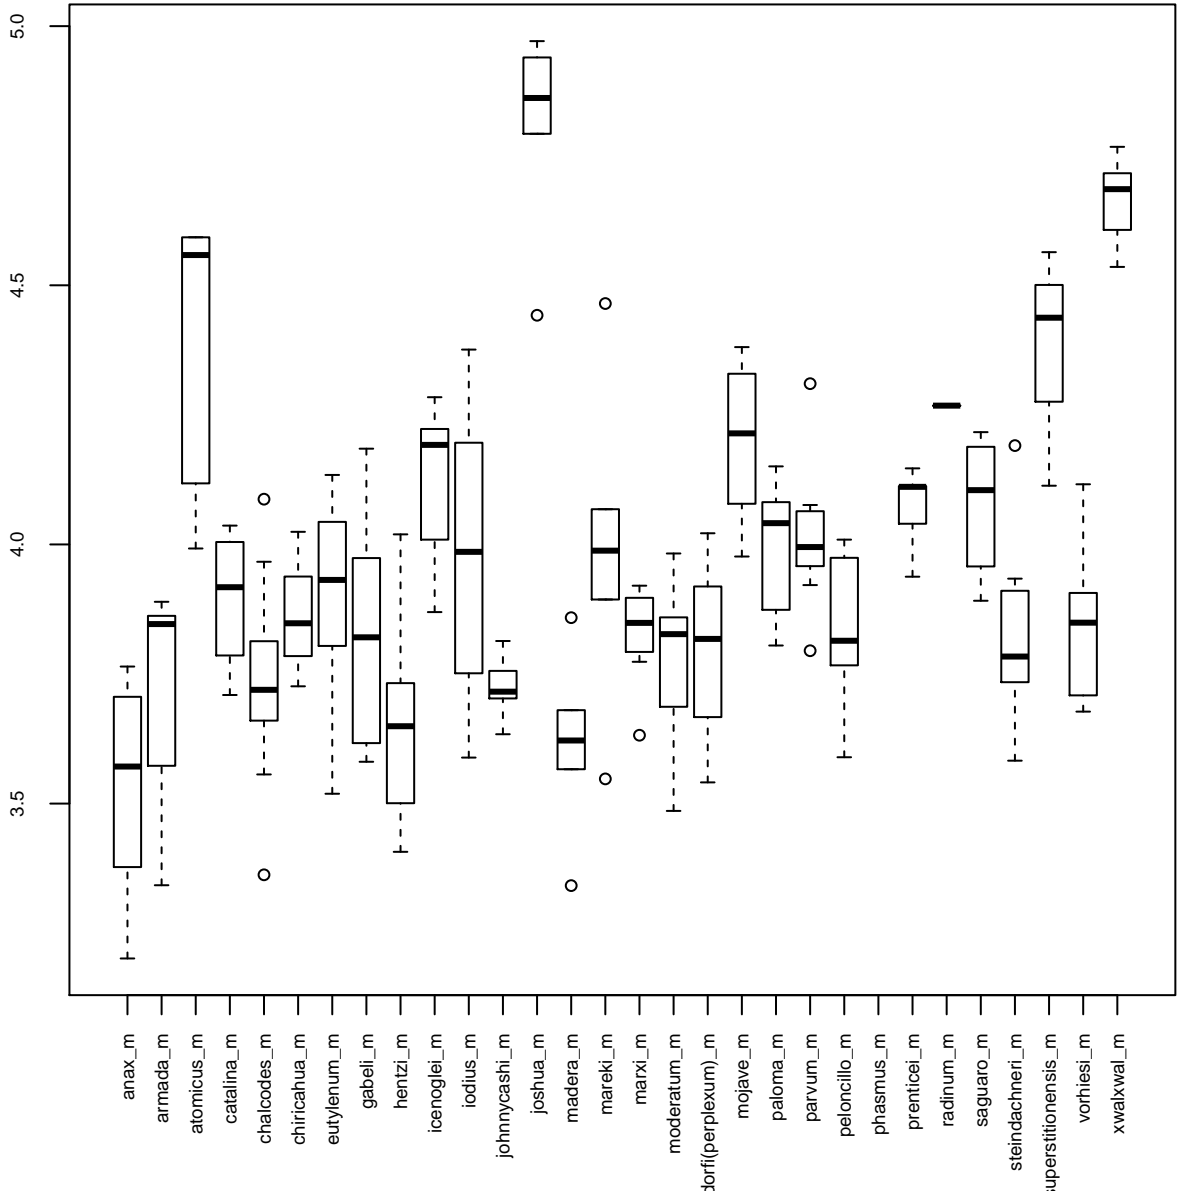

Supplement: Supplementary file 1092

## Metatarsus 1/Patella 3 Length ratio – males

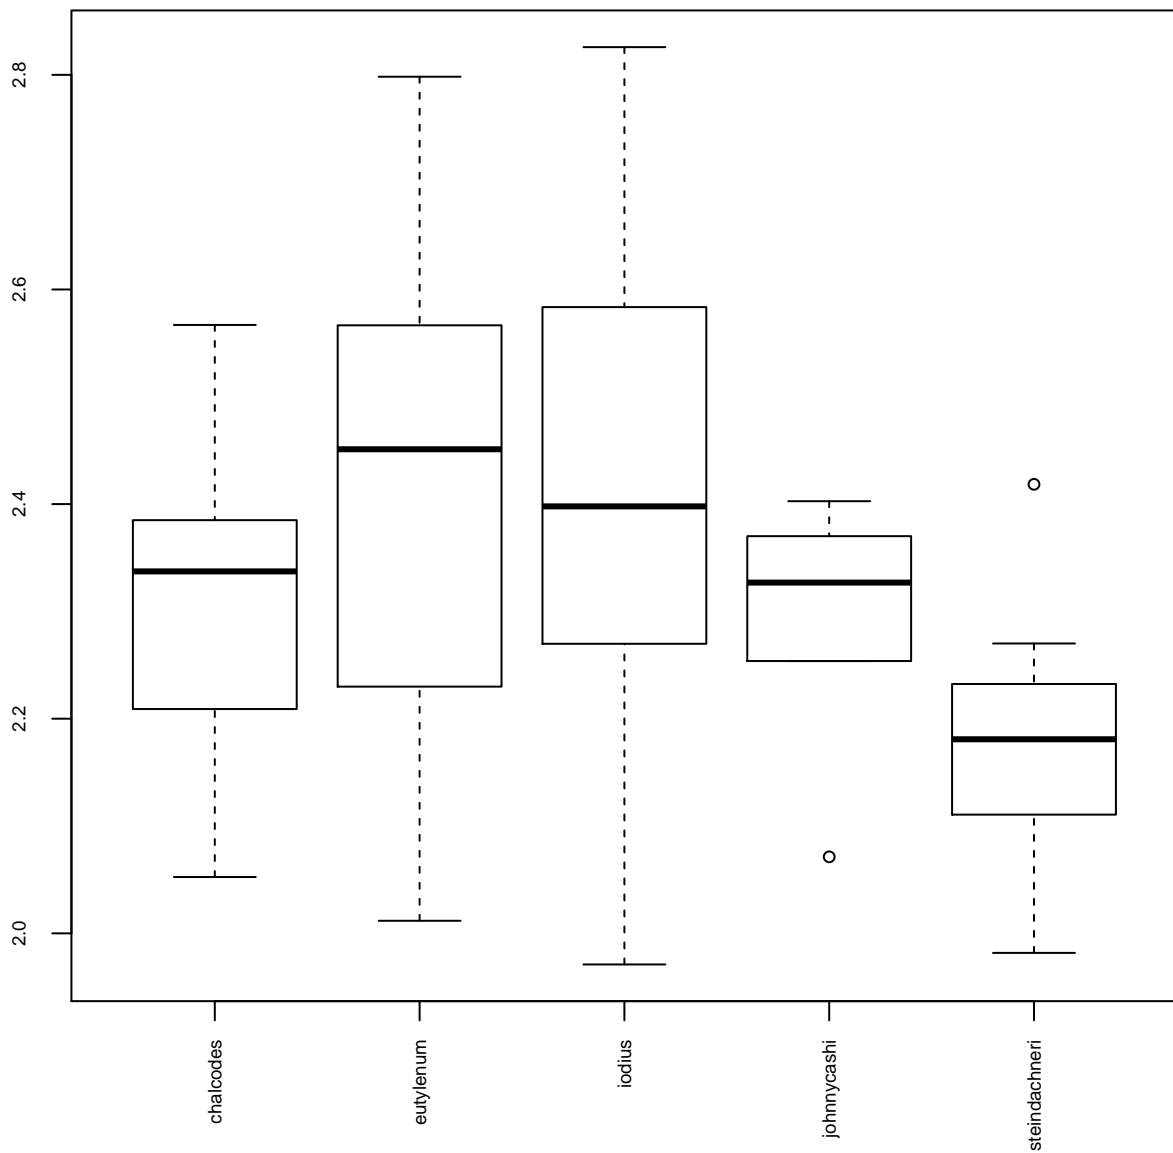

Supplement: Supplementary file 1093

## Tarsus 1/Metatarsus 4 Length ratio – males

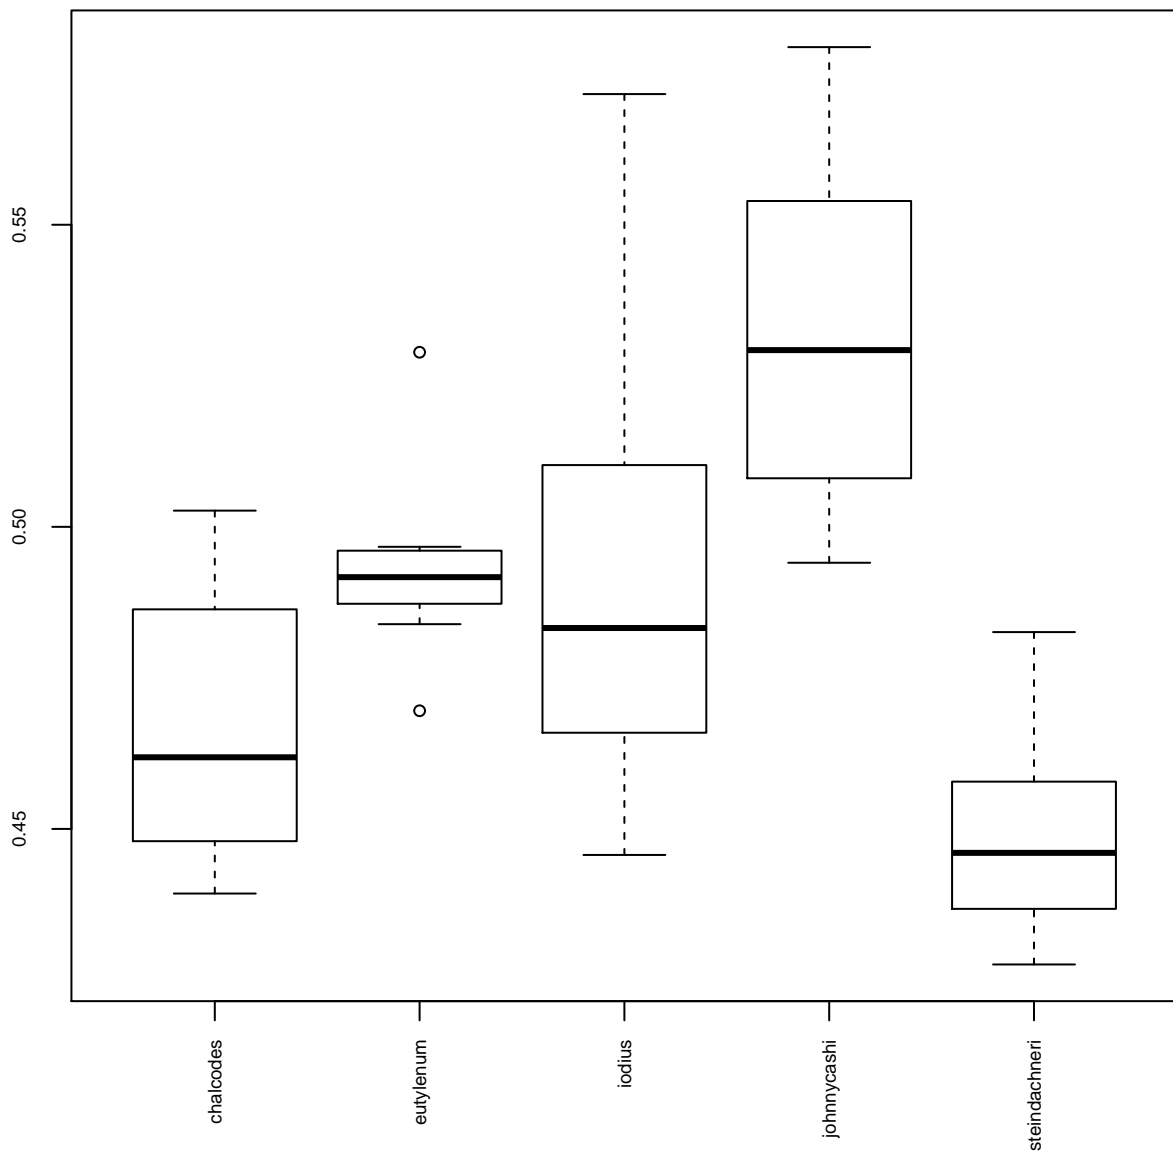

Supplement: Supplementary file 1094

## Femur 4/Metatarsus 4 ratio – females

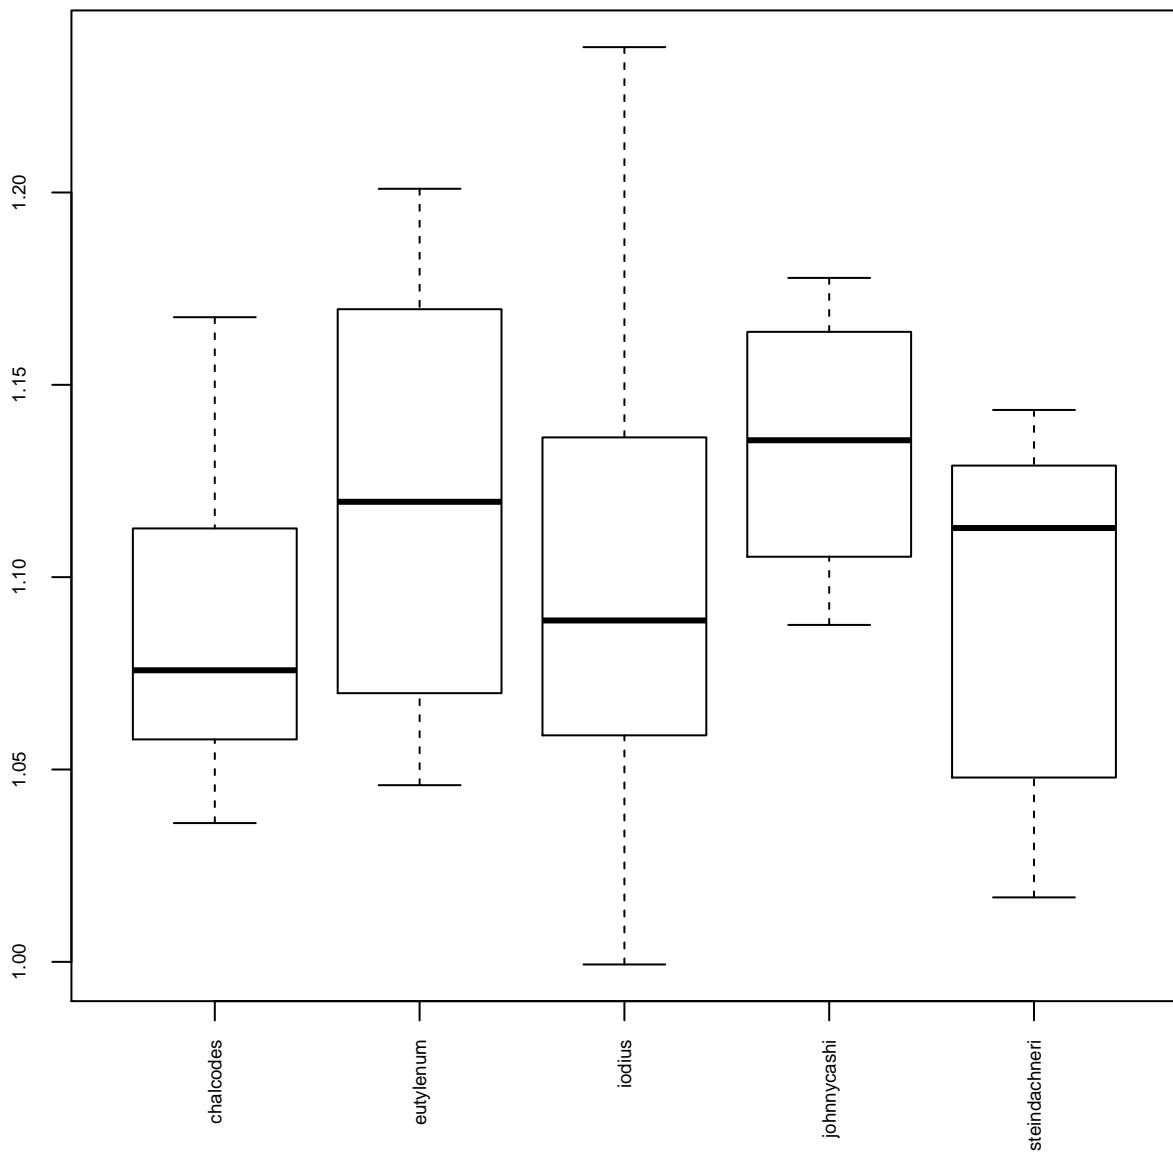

Supplement: Supplementary file 1095

## Tarsus 3/Femur 4 Length ratio – males

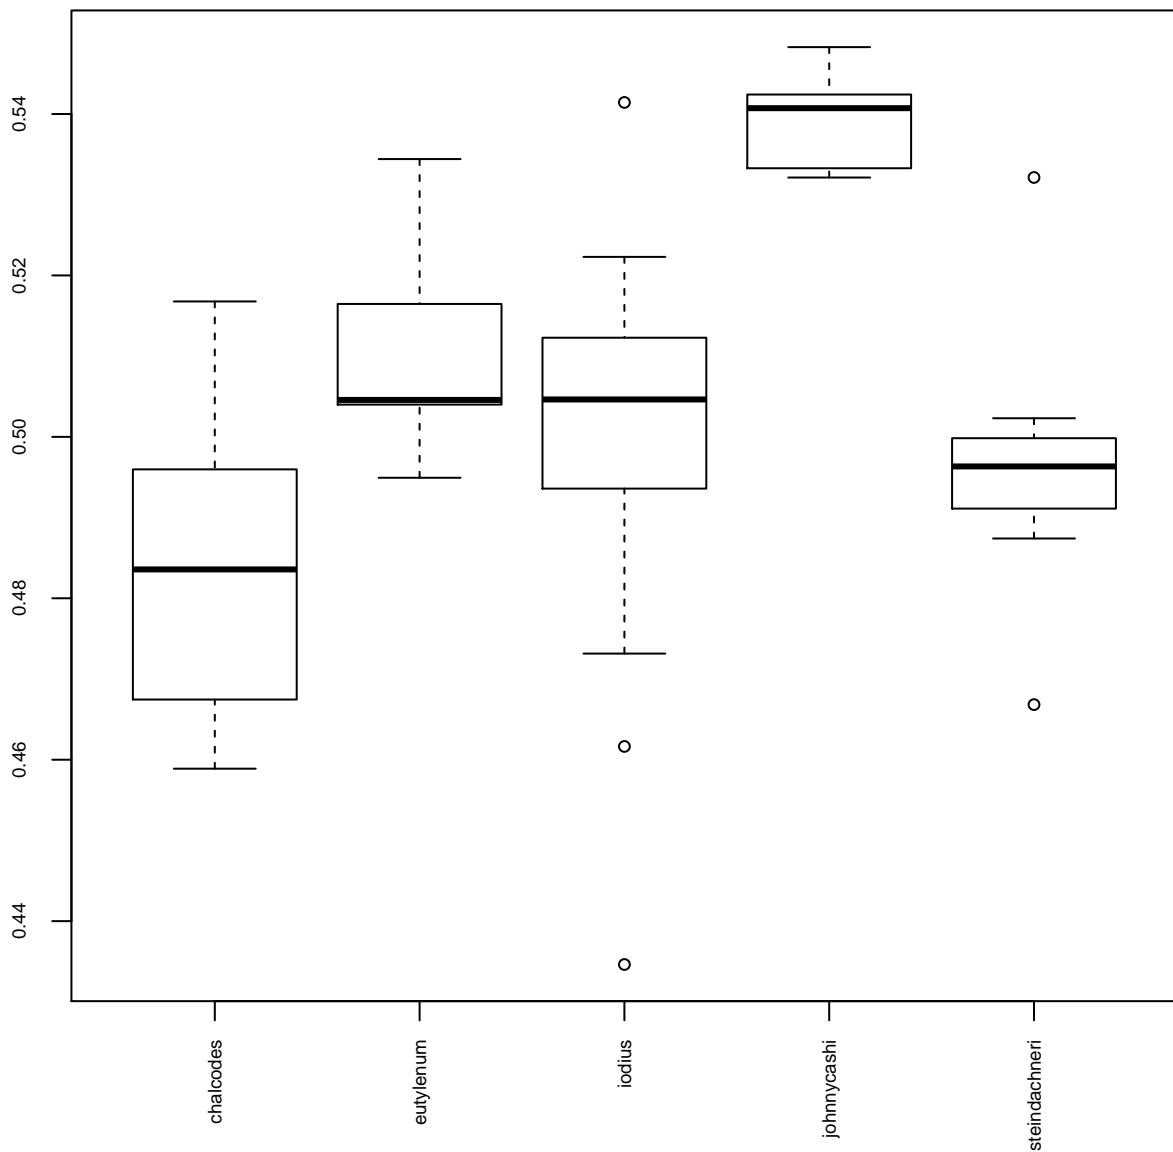

Supplement: Supplementary file 1096

## Femur 3/Patella 4 Length ratio – males

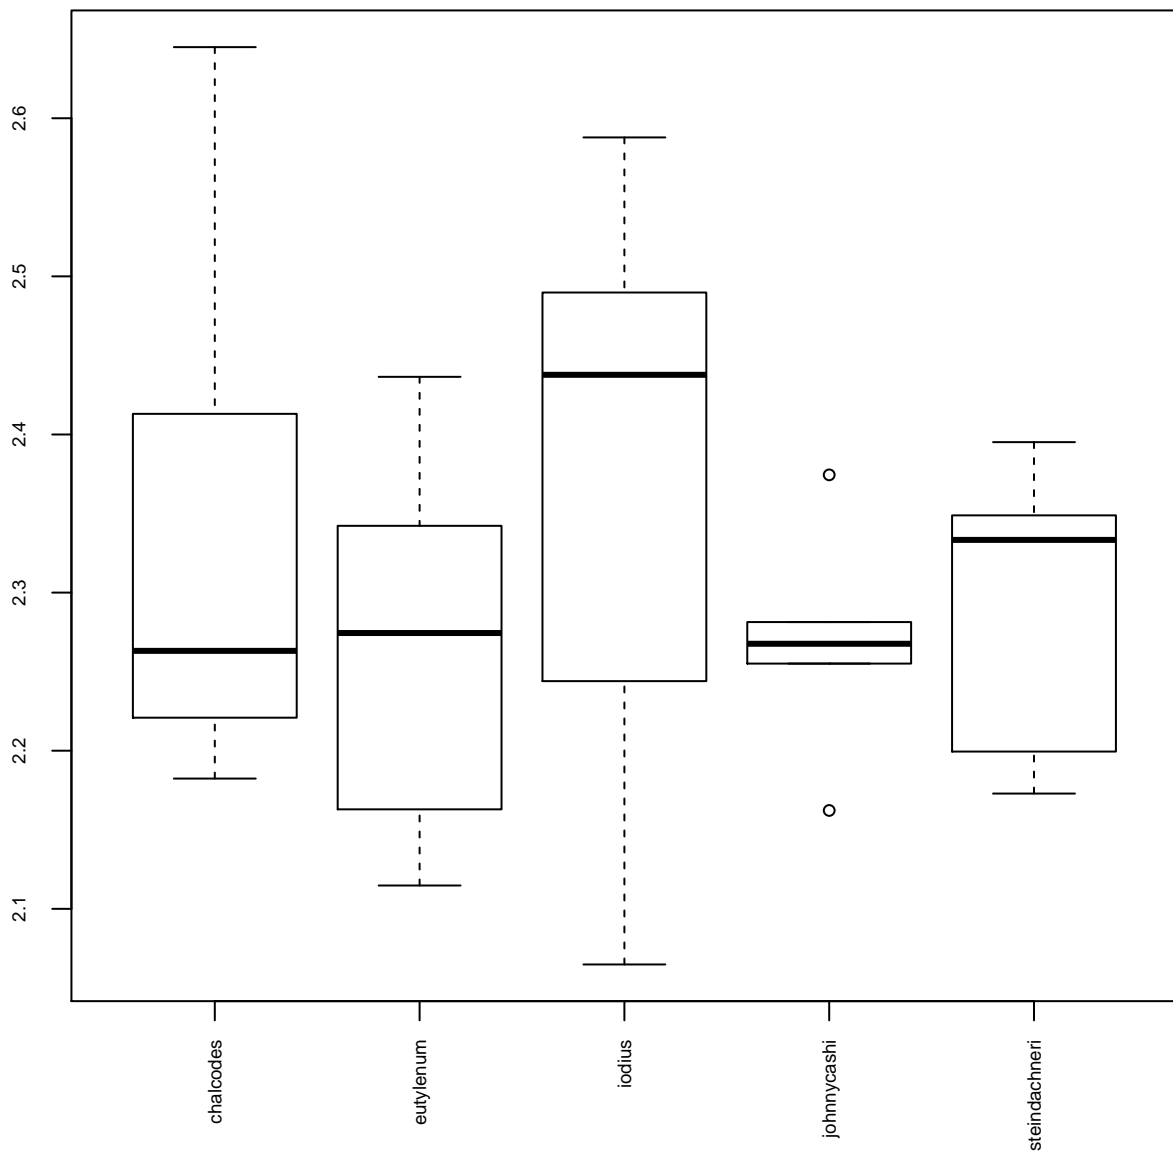

Supplement: Supplementary file 1097

## Femur 3 Length/Width ratio – males

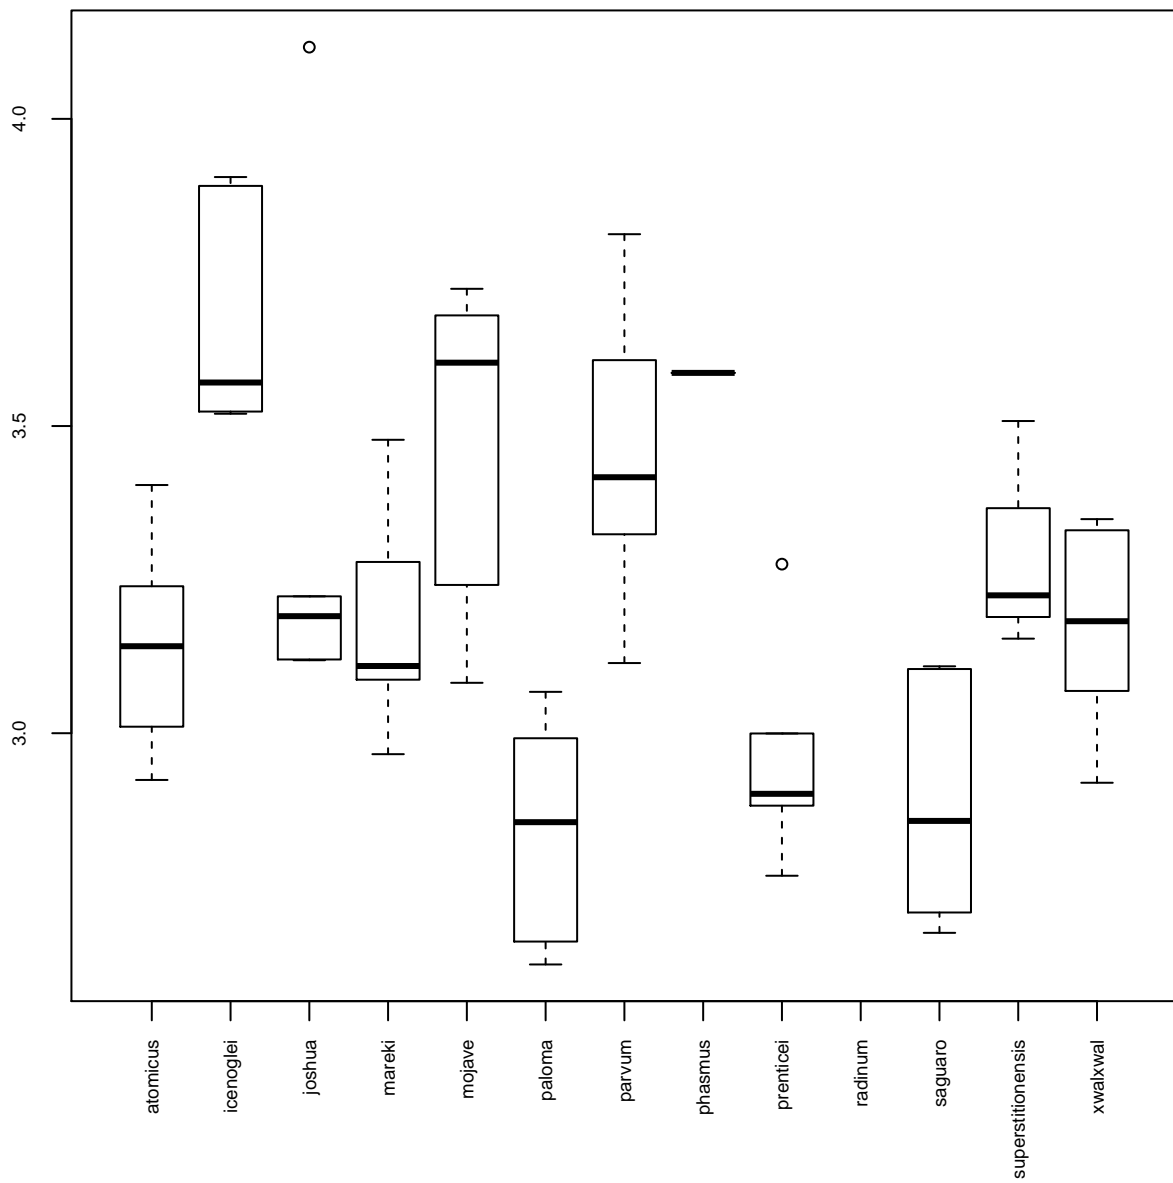

Supplement: Supplementary file 1098

# Tarsus 3/Femur 4 Length ratio – males

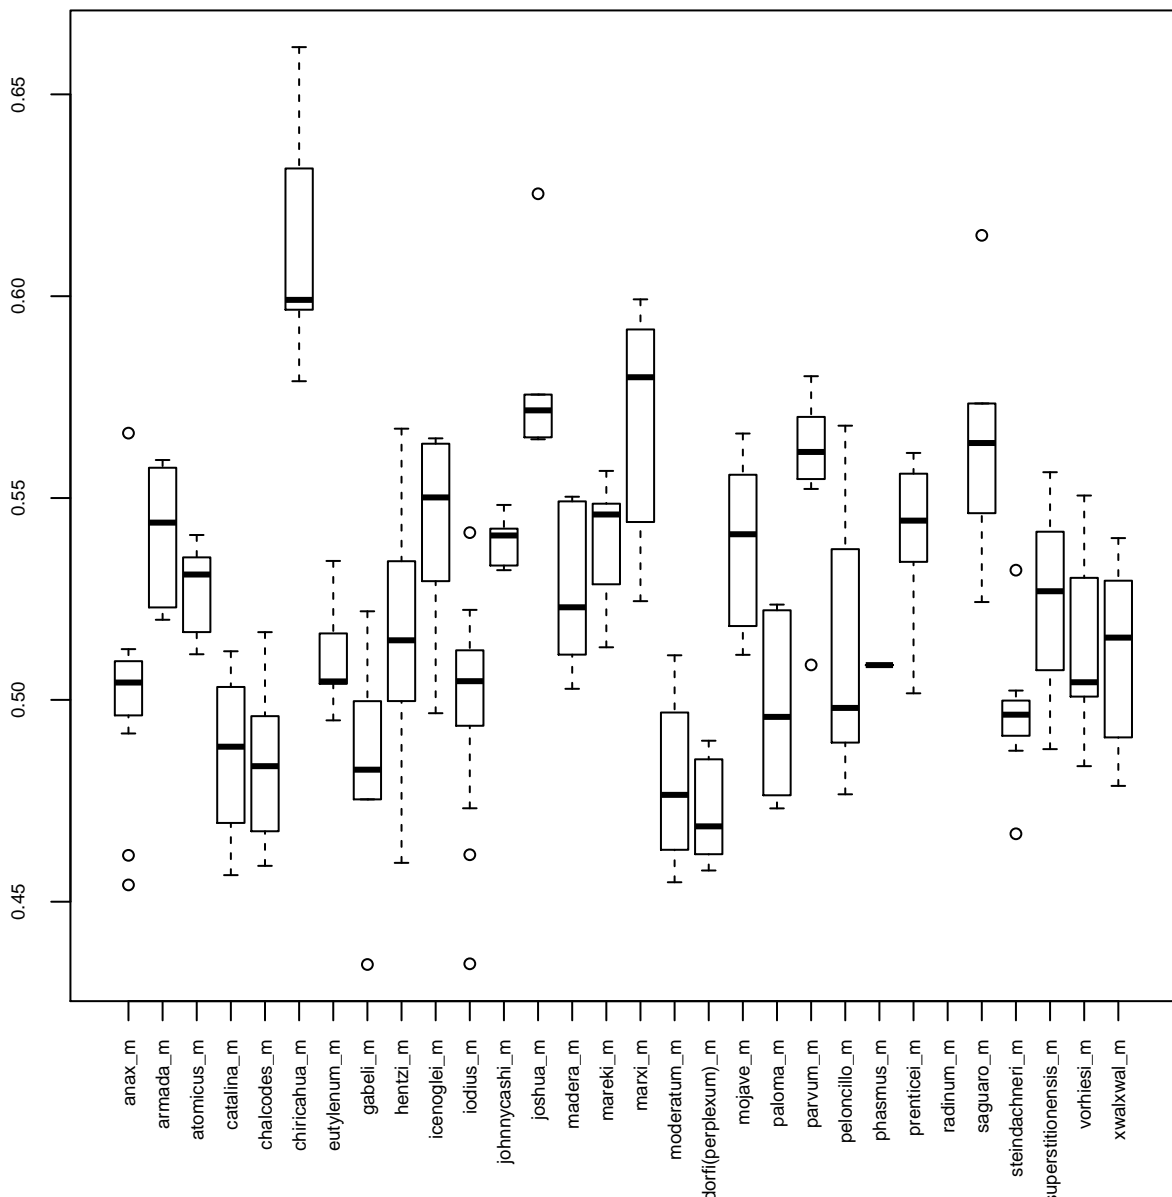

Supplement: Supplementary file 1099

## Tarsus 1/Tibia 3 Length ratio – males

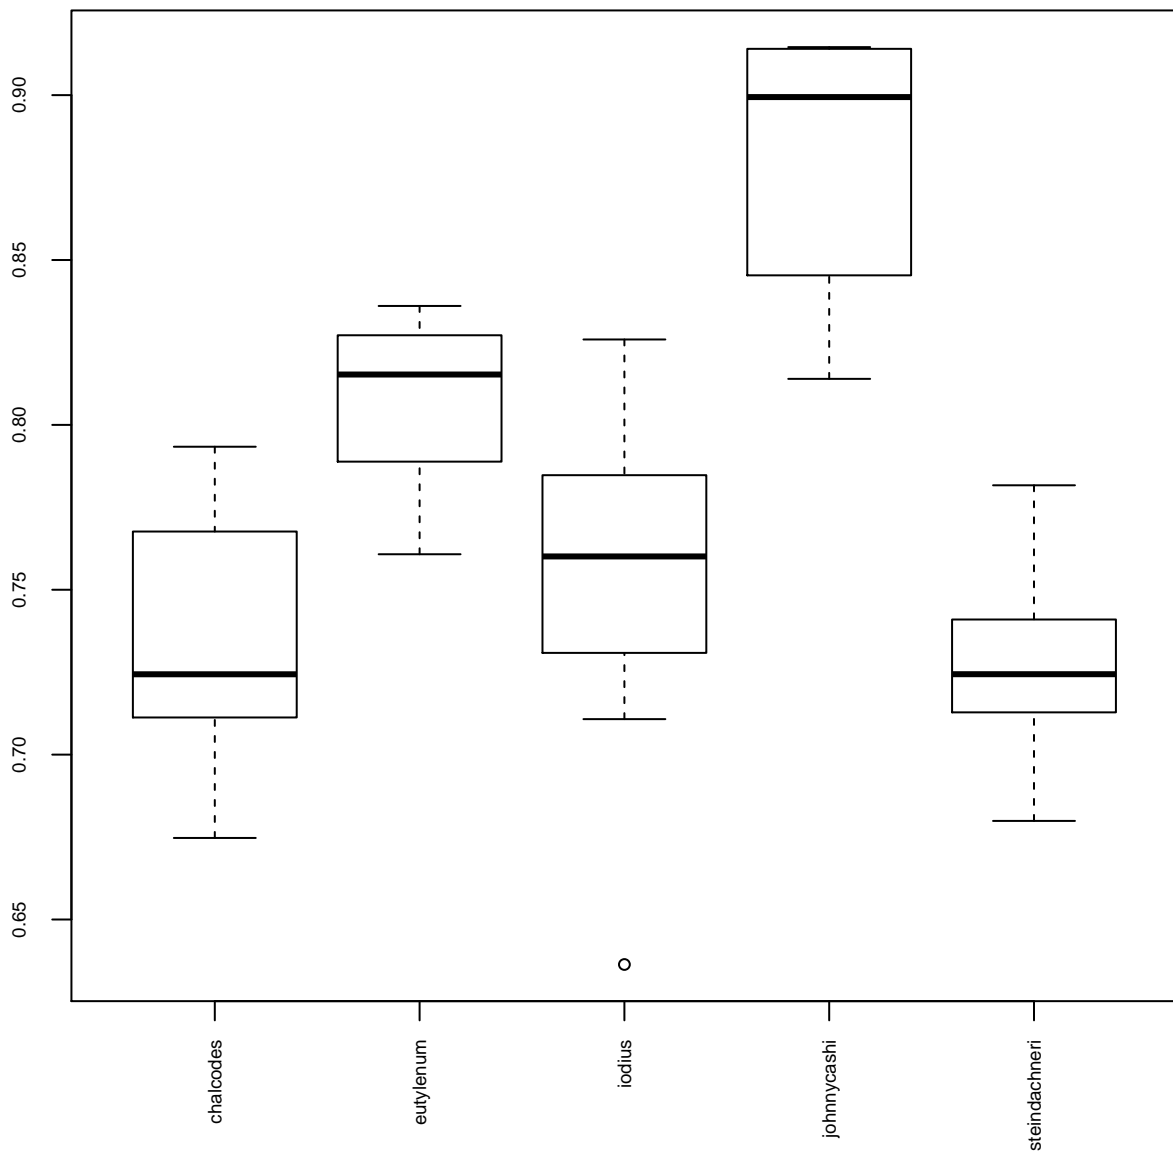

Supplement: Supplementary file 1100
