# Supplementary material (part 12 of 15)
Source: publisher site journal article supplement (http://zookeys.pensoft.net/article/6264/download/suppl/32/)

# Carapace Length/Metatarsus 1 ratio – females

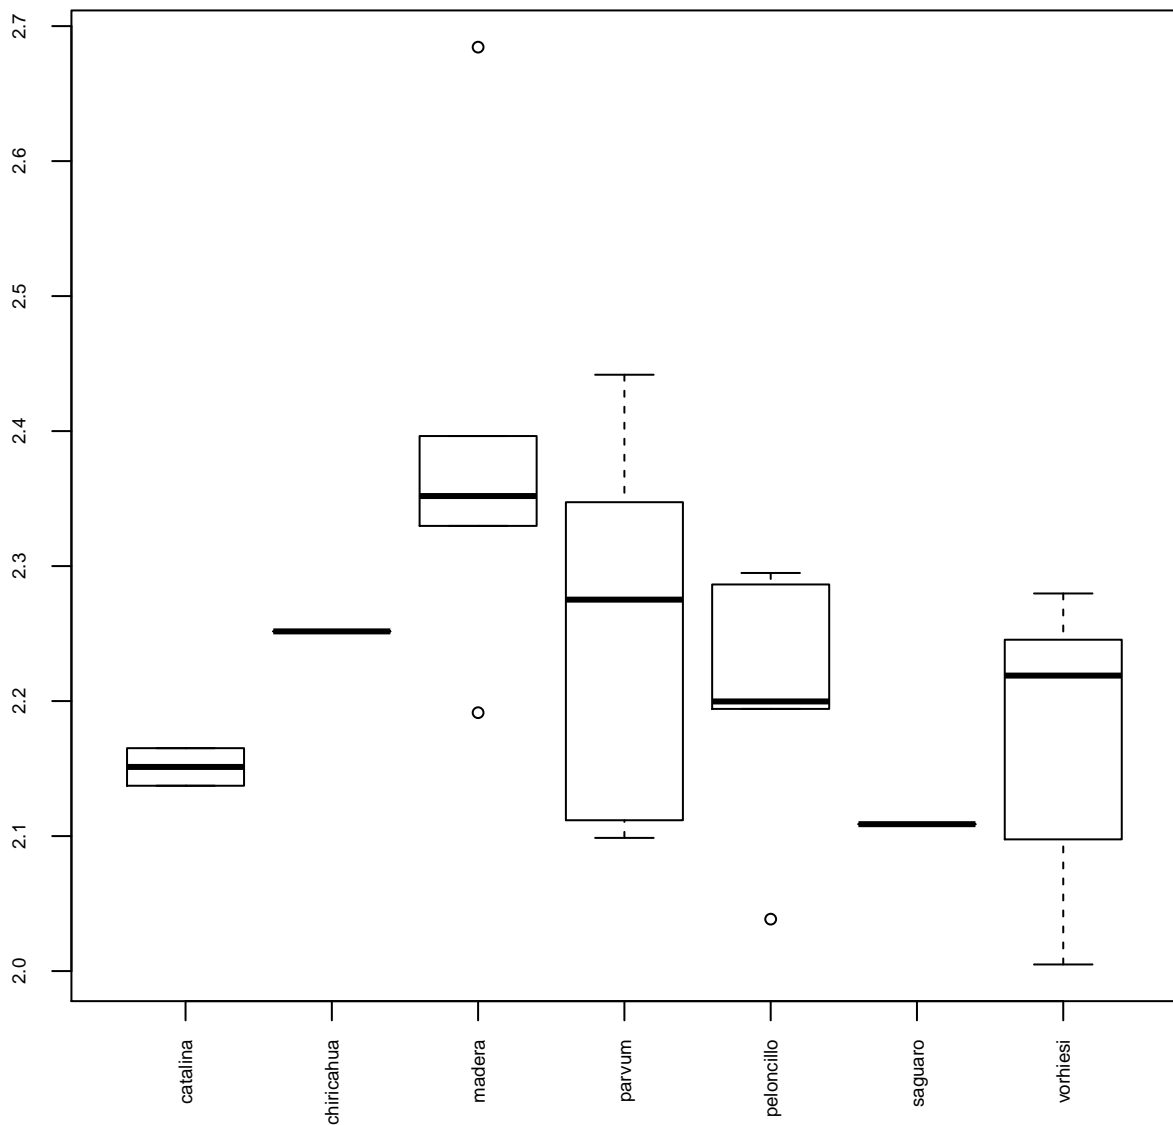

Supplement: Supplementary file 1101

## Tarsus 1/Patella 3 Length ratio – males

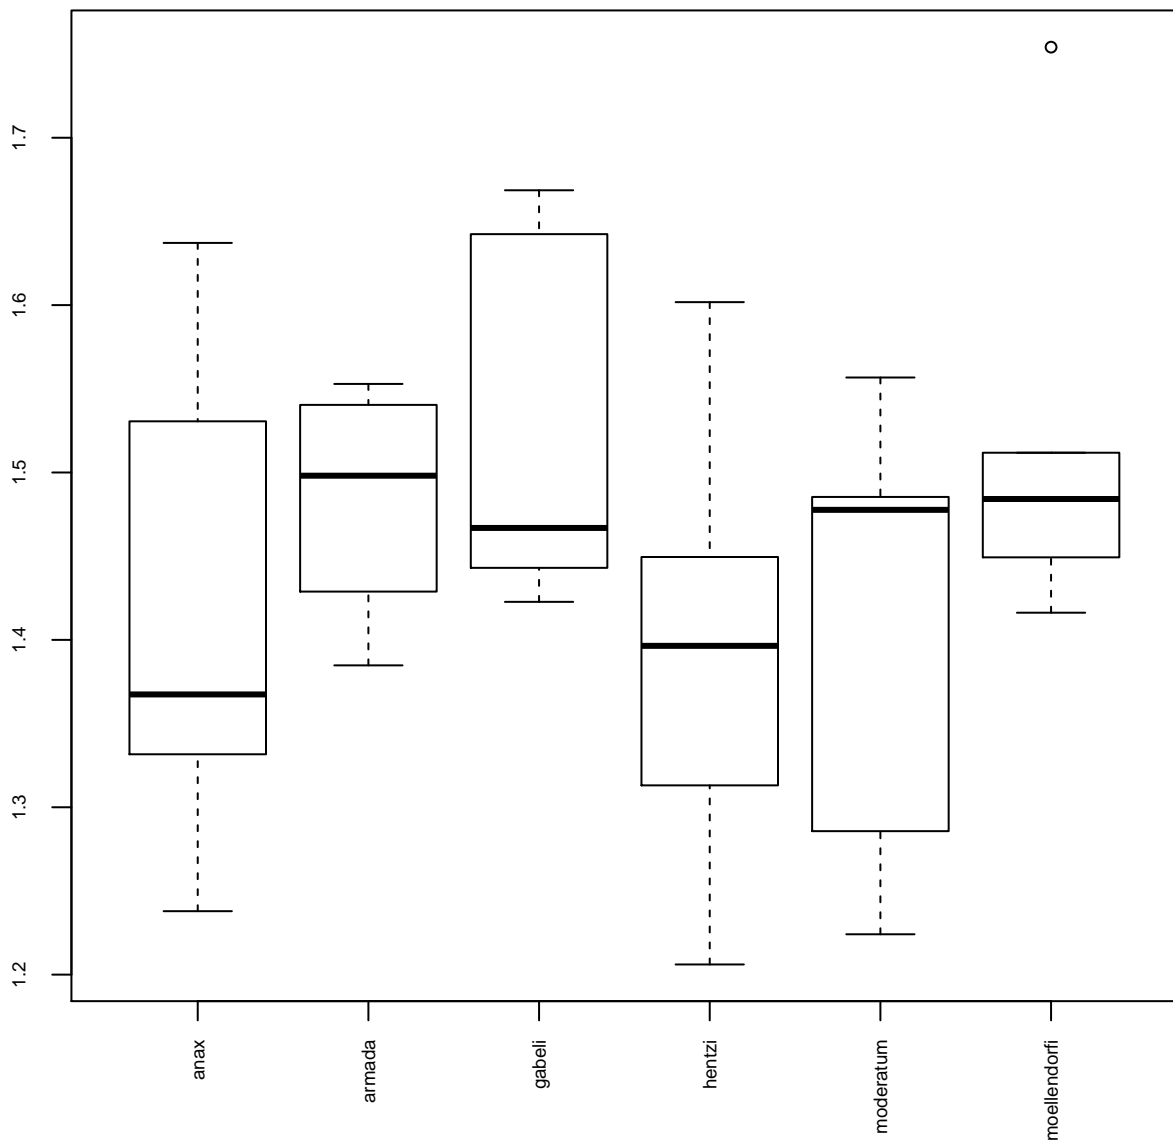

Supplement: Supplementary file 1102

## Leg 1/Leg 3 Length ratio – males

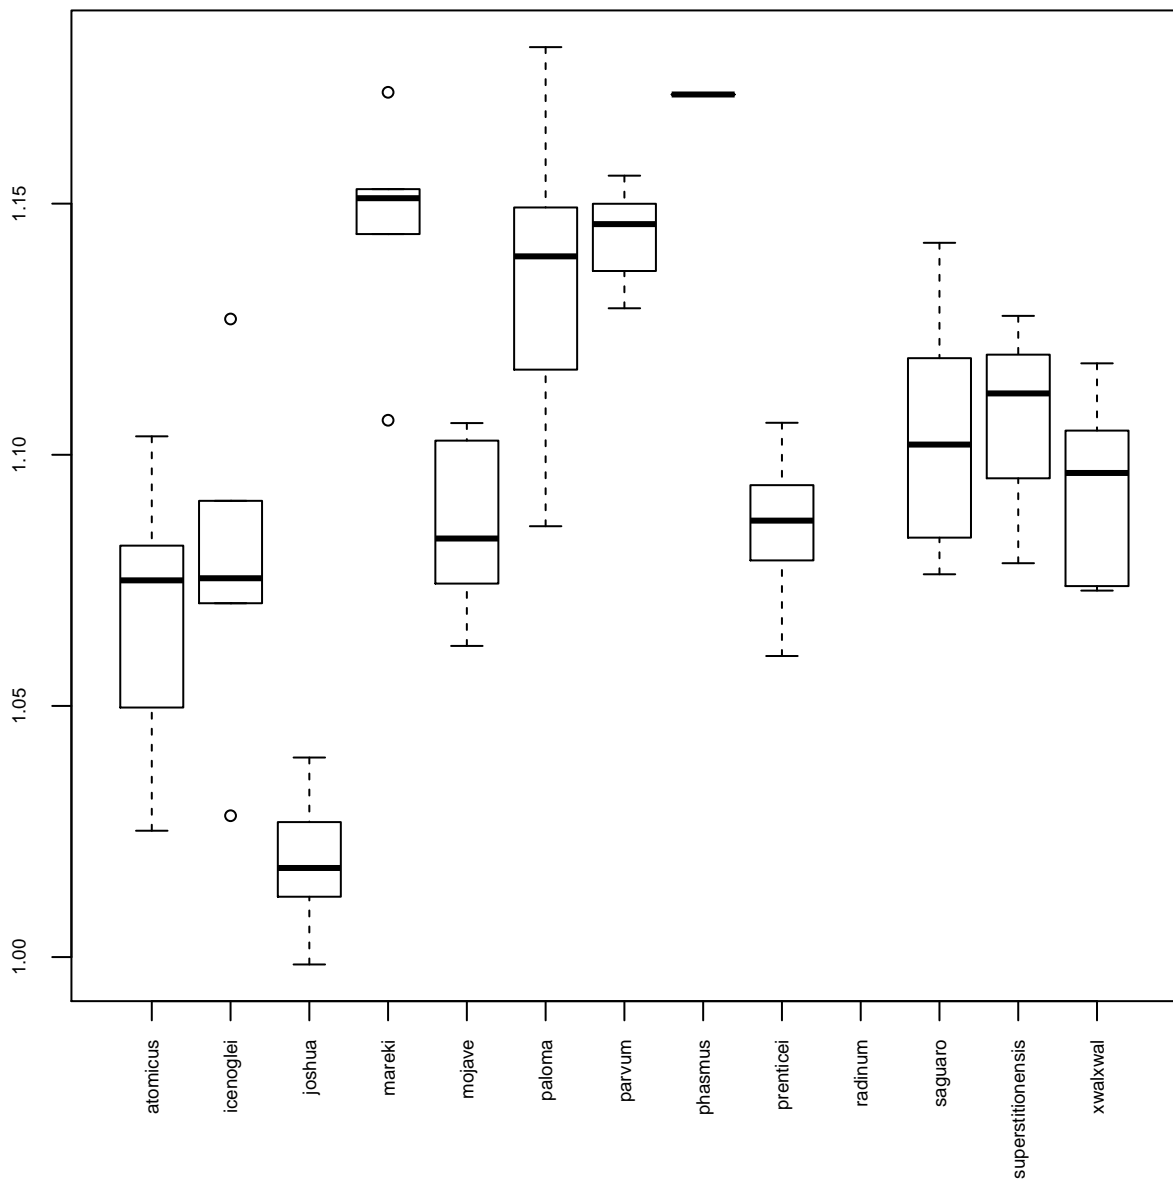

Supplement: Supplementary file 1103

# Femur 3/Patella 4 Length ratio – females

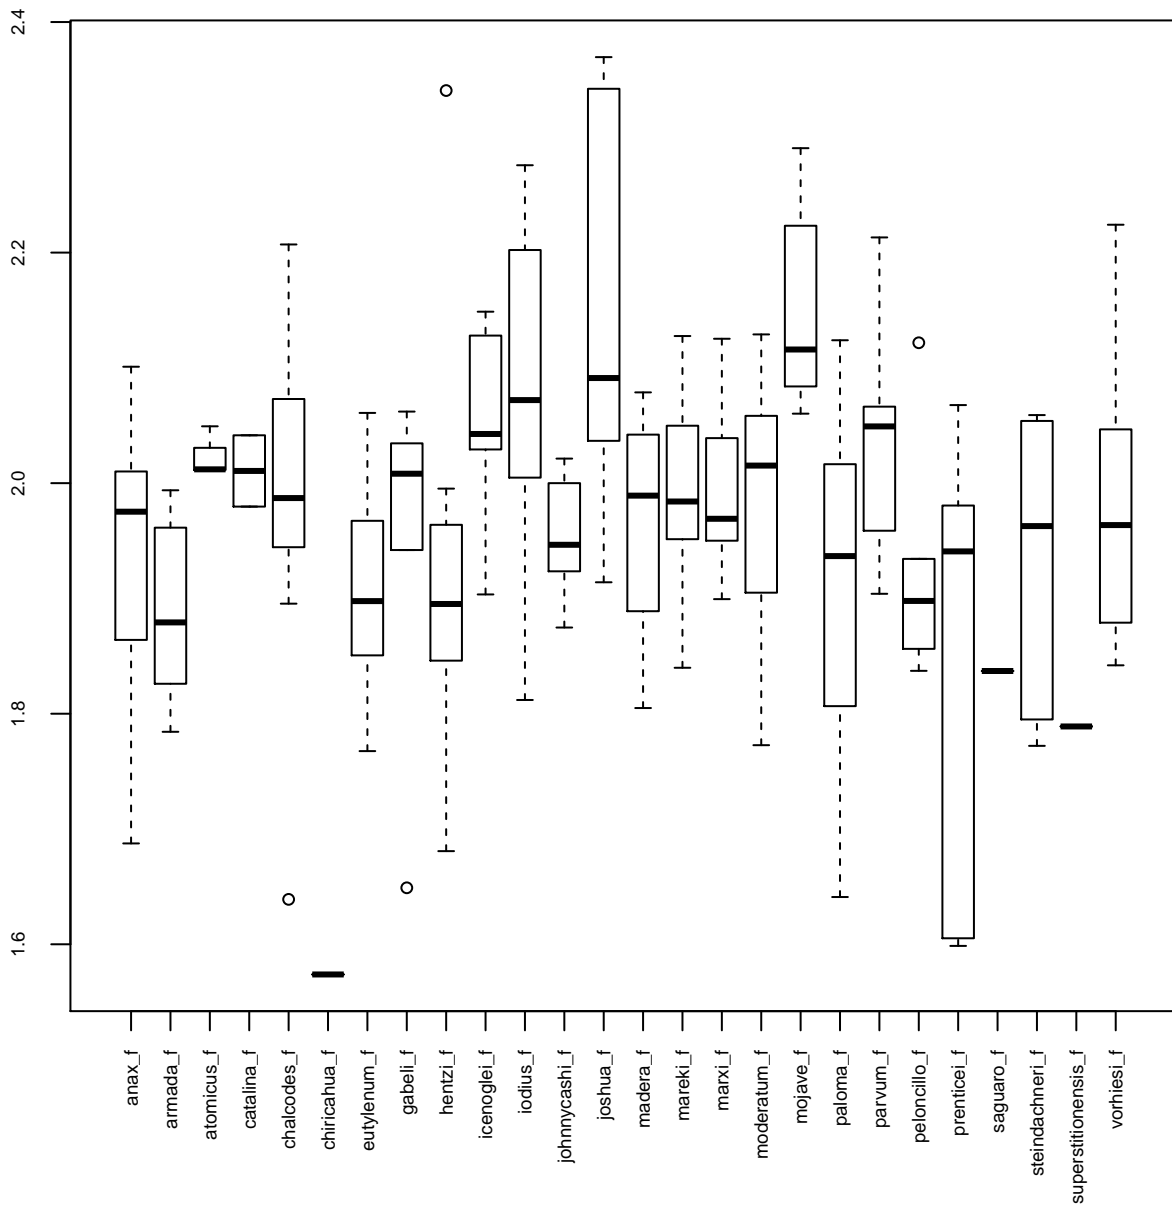

Supplement: Supplementary file 1104

## Tarsus 3/Patella 4 Length ratio – females

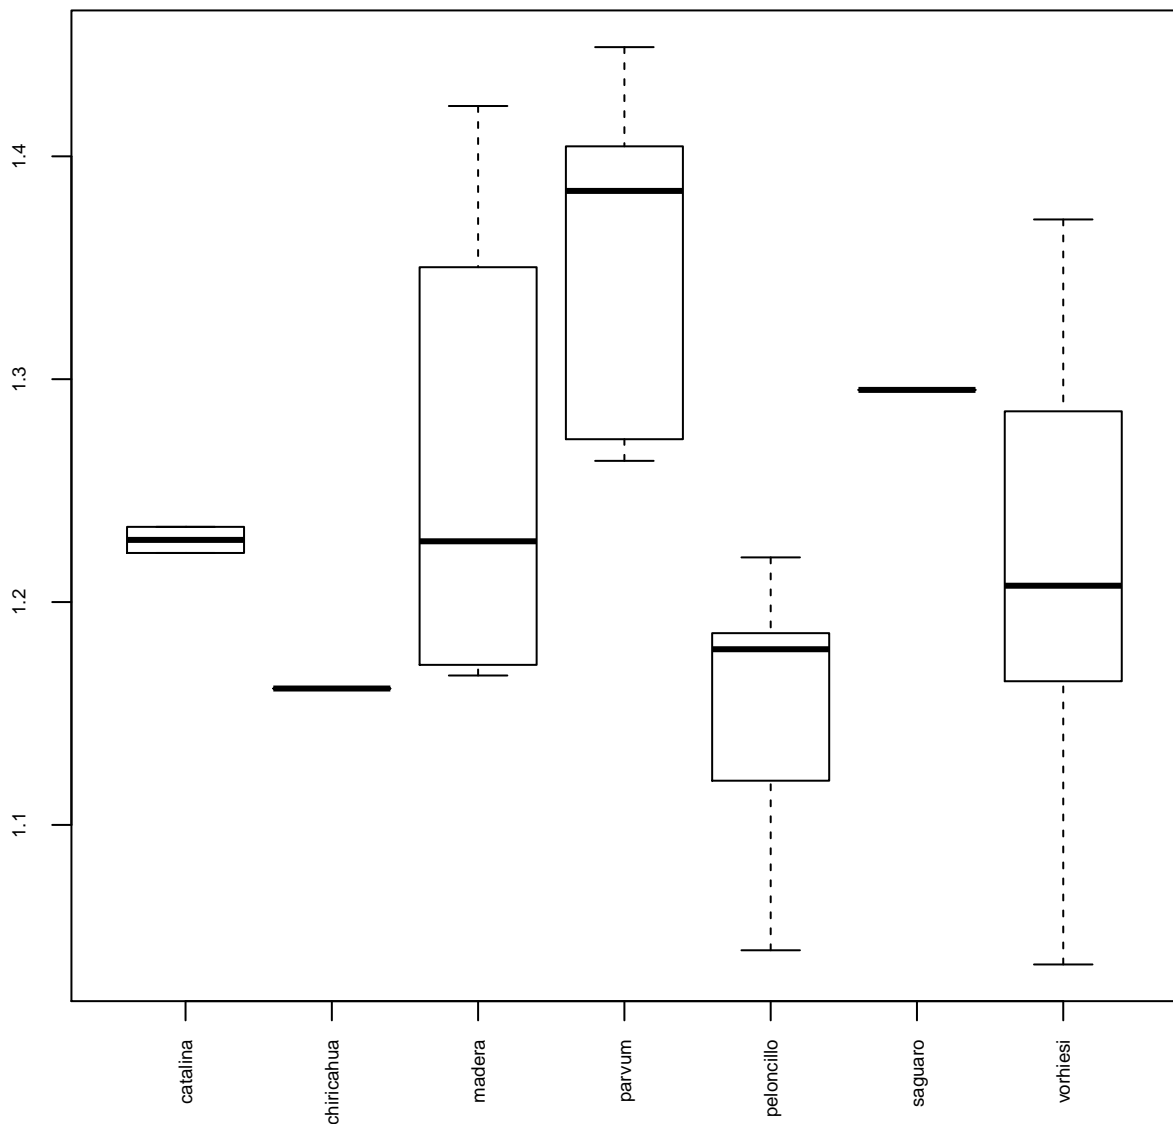

Supplement: Supplementary file 1105

## Tibia 1/Tibia 3 ratio – males

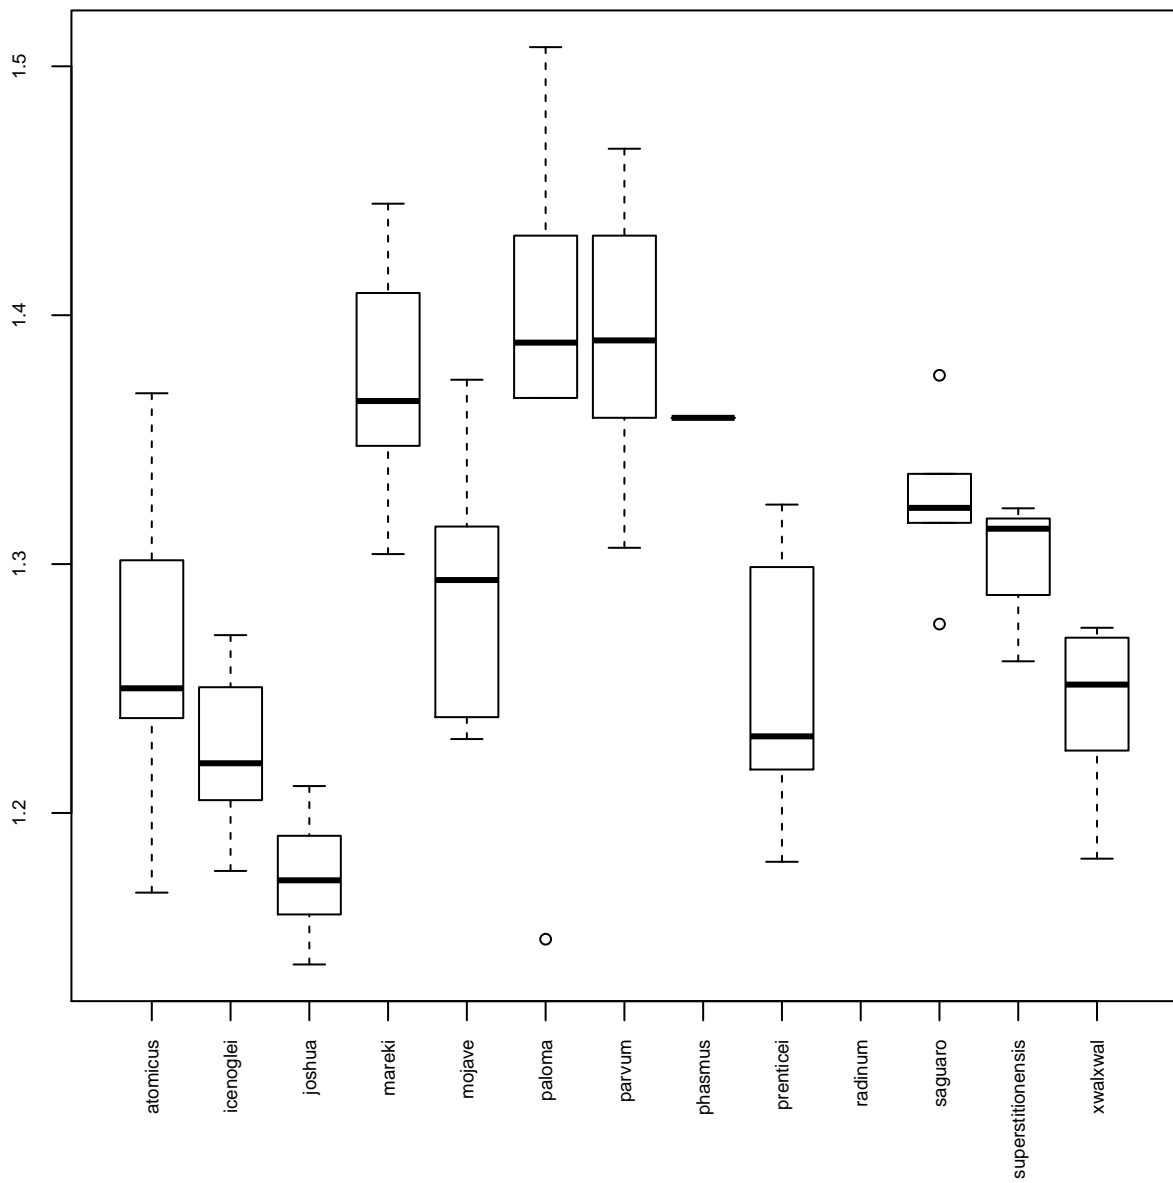

Supplement: Supplementary file 1106

## Tarsus 1/Tarsus 3 ratio – females

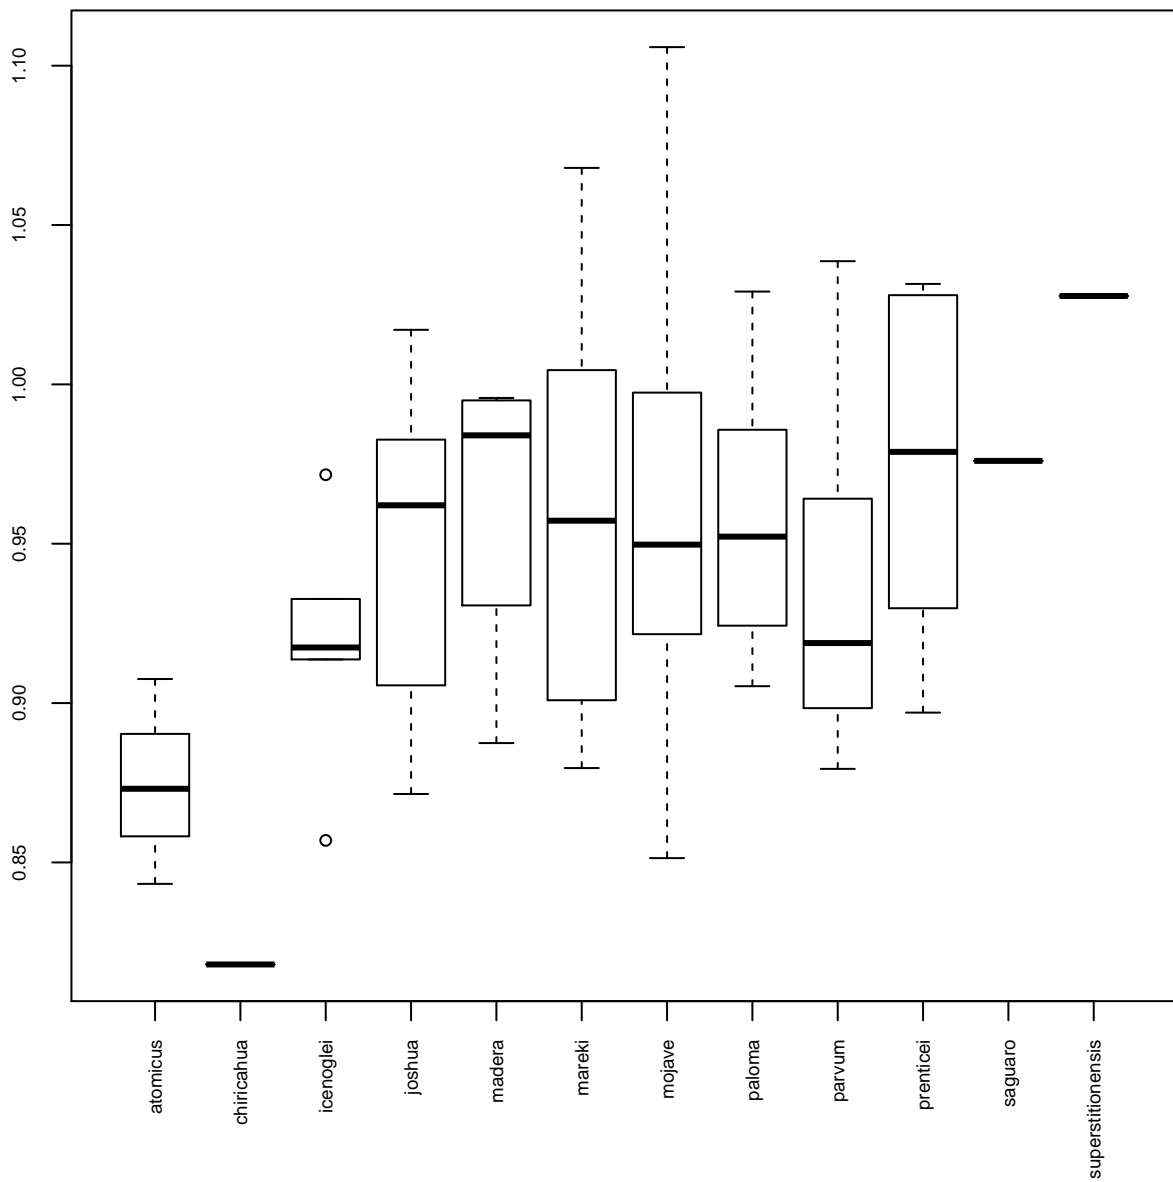

Supplement: Supplementary file 1107

## Tibia 1/Tibia 4 ratio – males

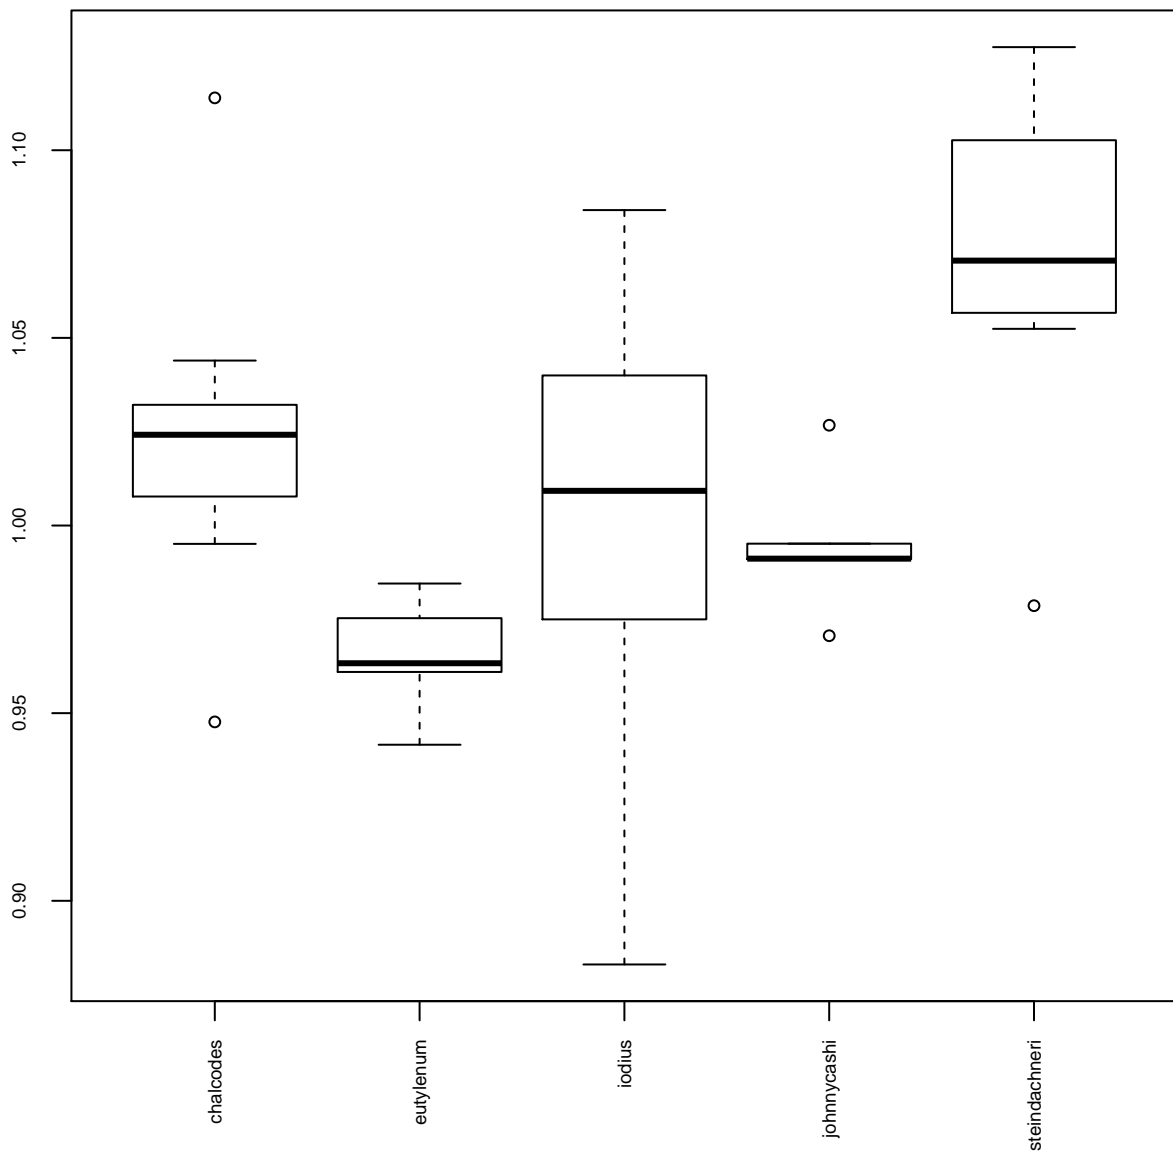

Supplement: Supplementary file 1108

## Tarsus 1/Femur 4 Length ratio – females

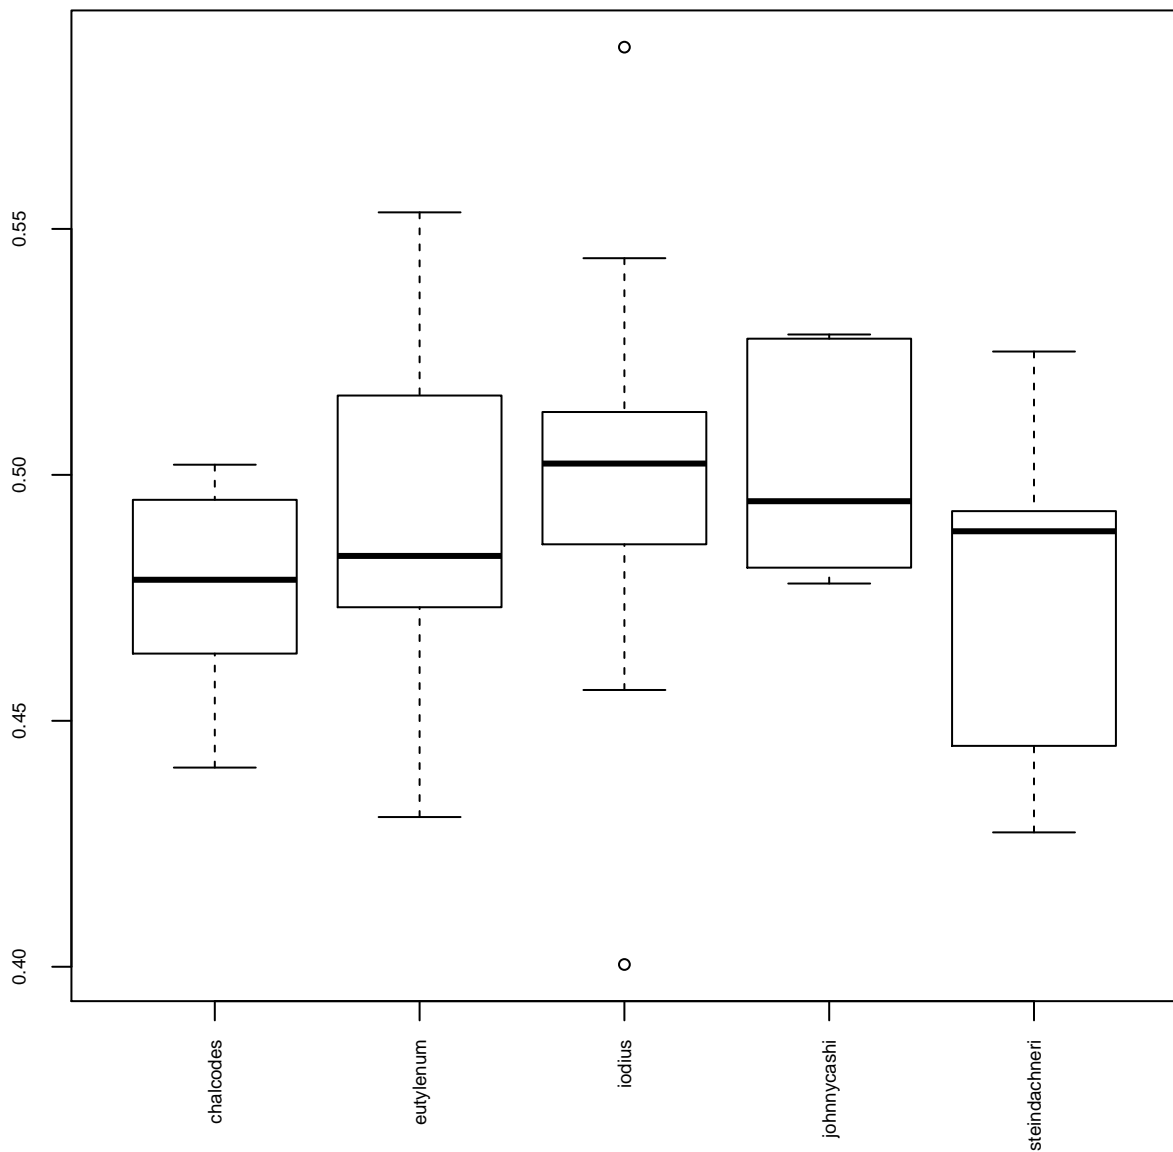

Supplement: Supplementary file 1109

## Palpal Tibia Length/Width ratio – males

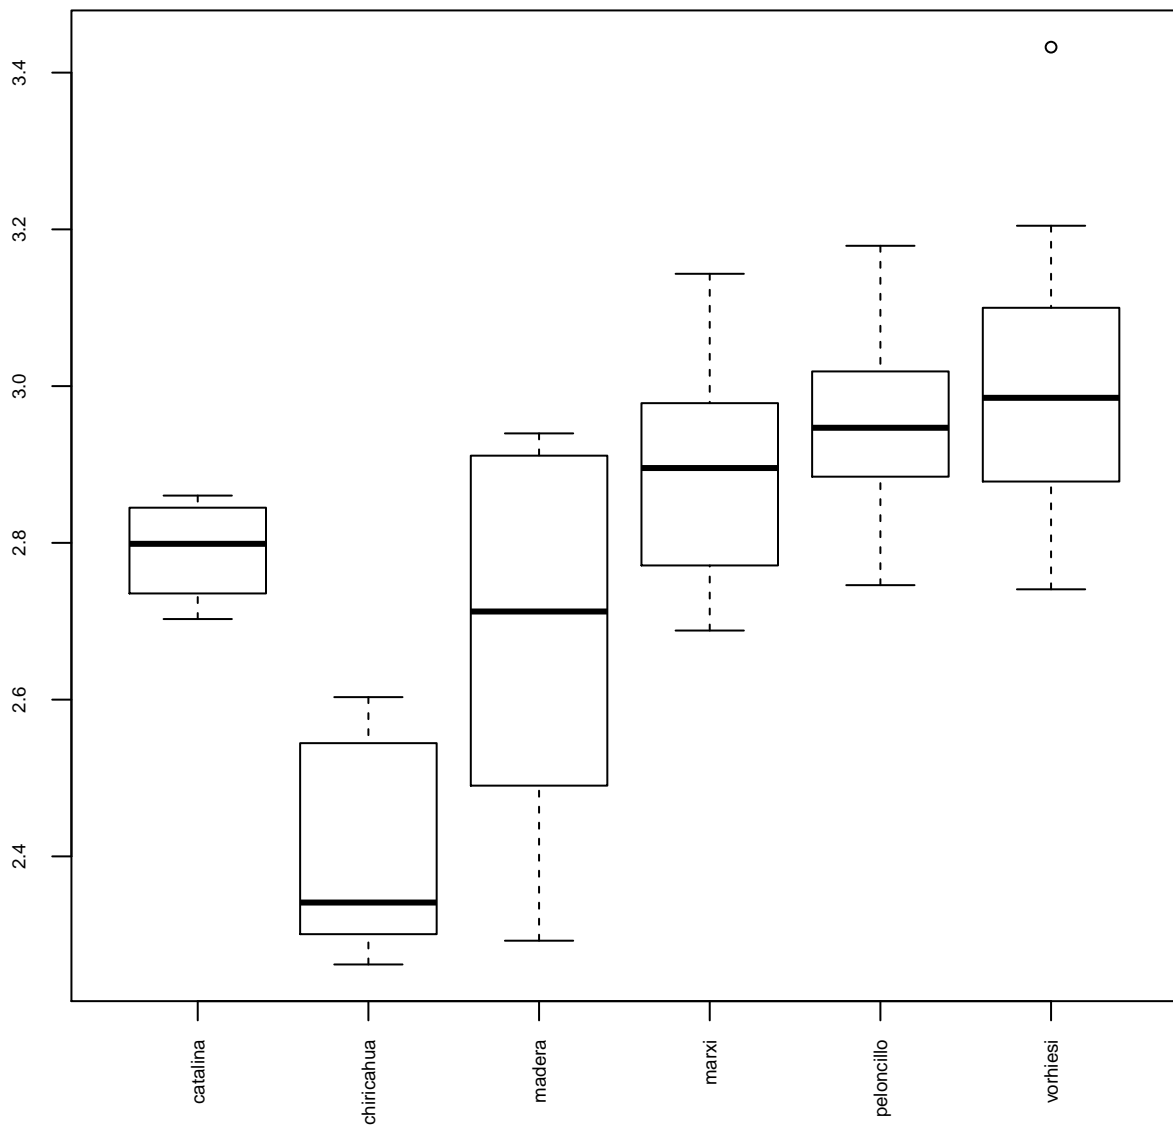

Supplement: Supplementary file 1110

# Patella 1/Patella 3 ratio – females

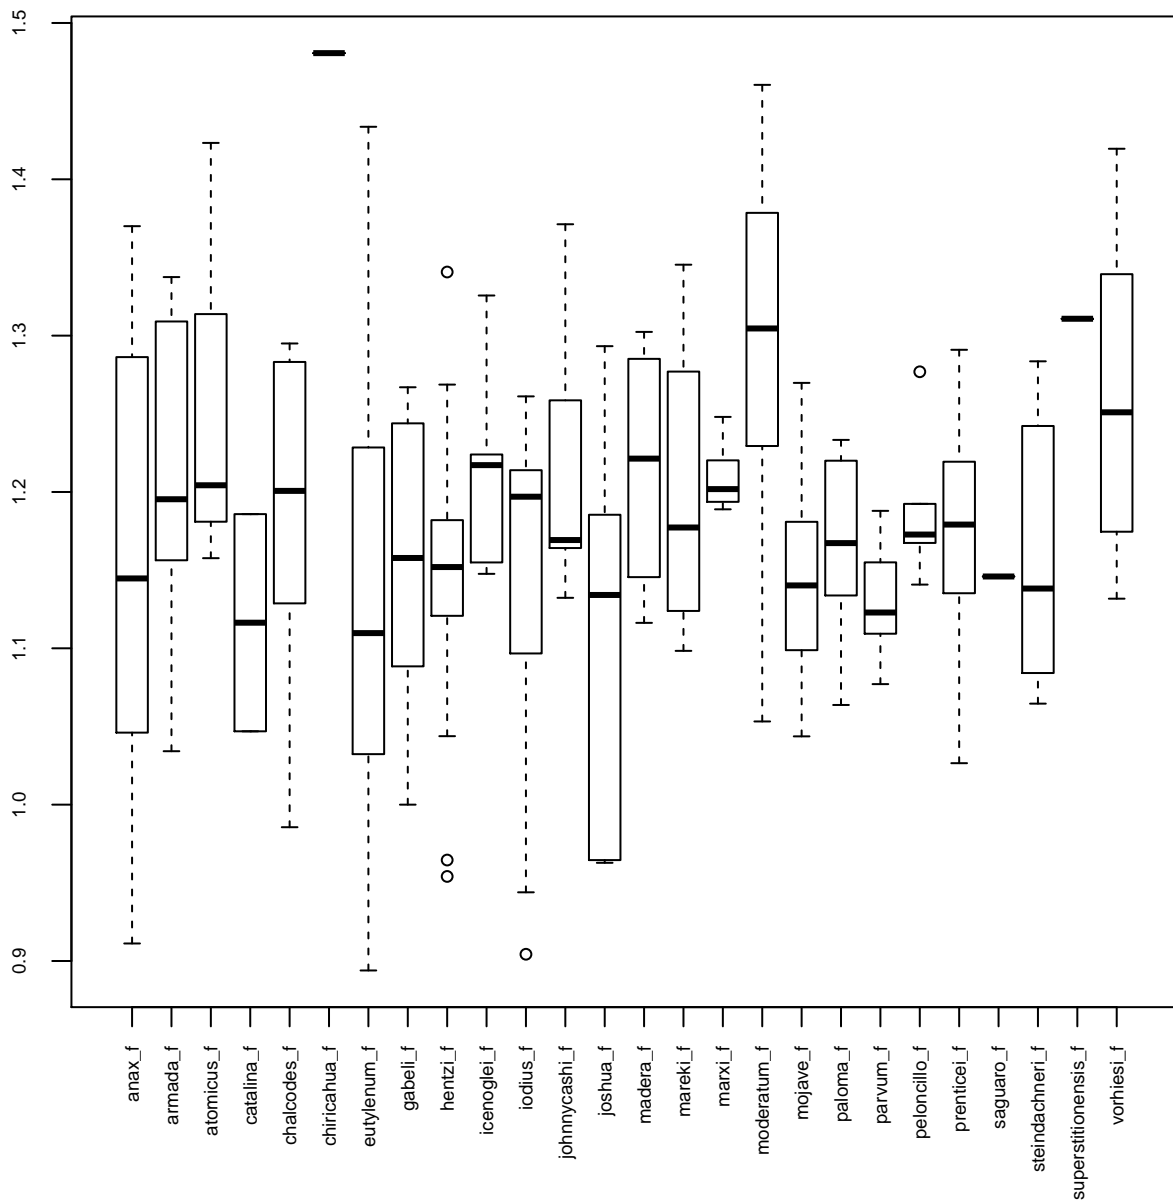

Supplement: Supplementary file 1111

# Tibia 1/Tibia 4 ratio – males

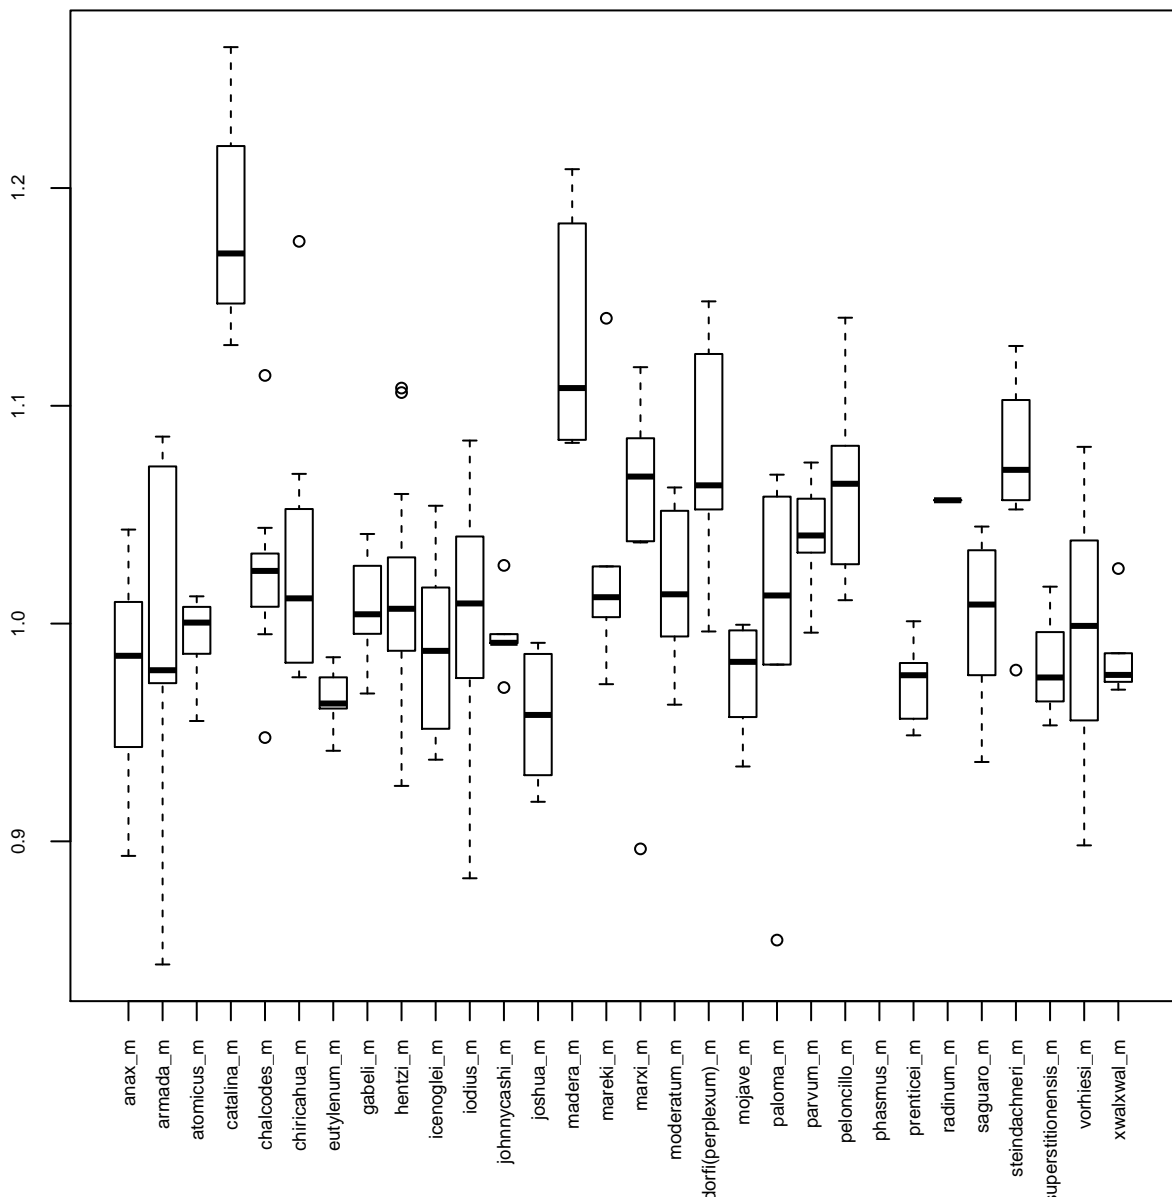

Supplement: Supplementary file 1112

## Patella 4/Tarsus 4 ratio – males

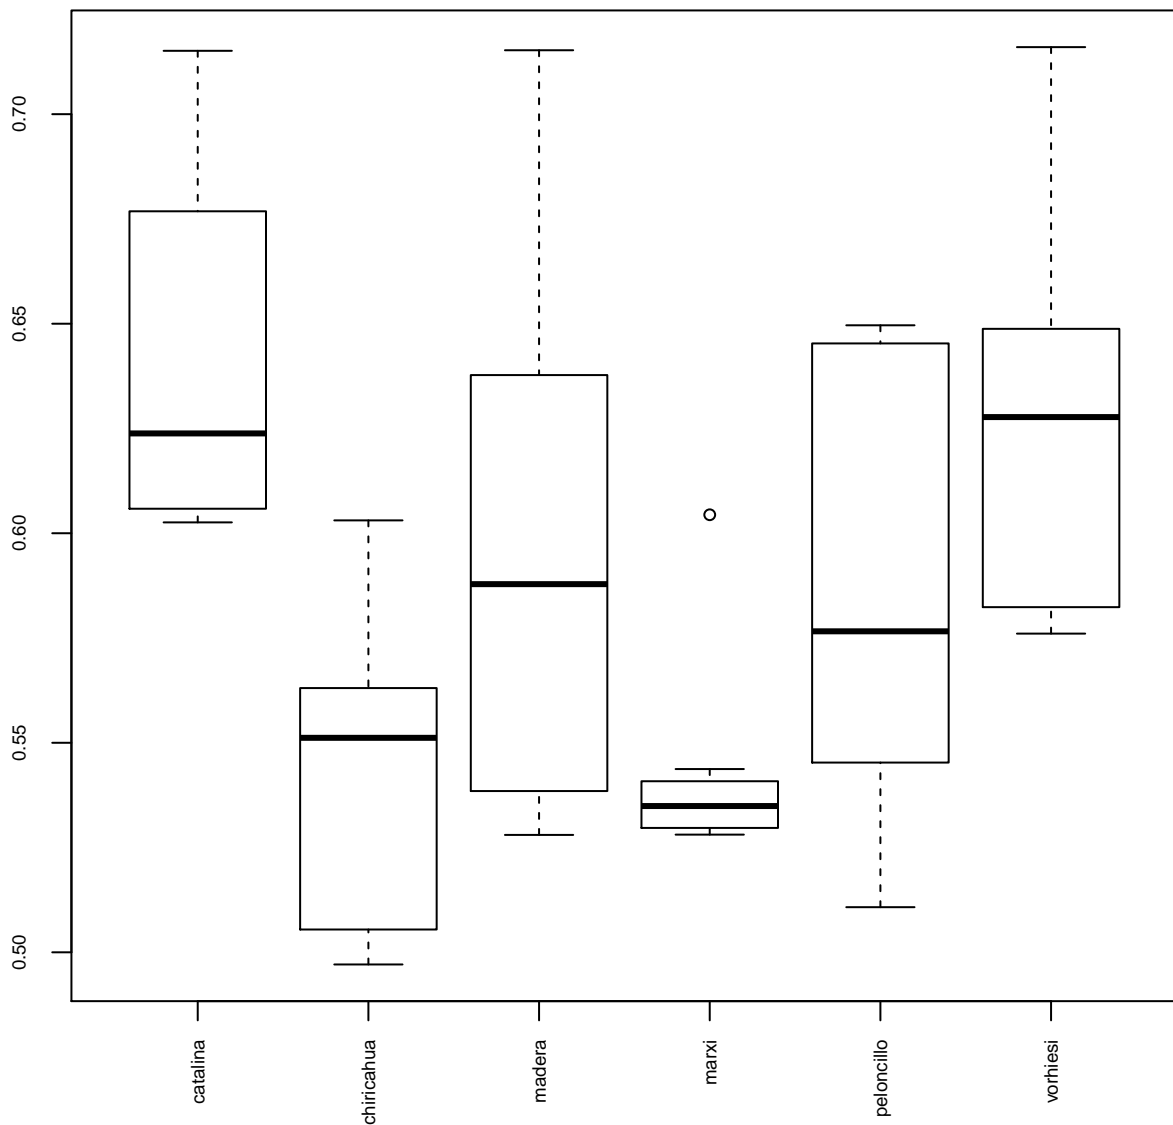

Supplement: Supplementary file 1113

# Palpal Tibia/Metatarsus 4 Length ratio – males

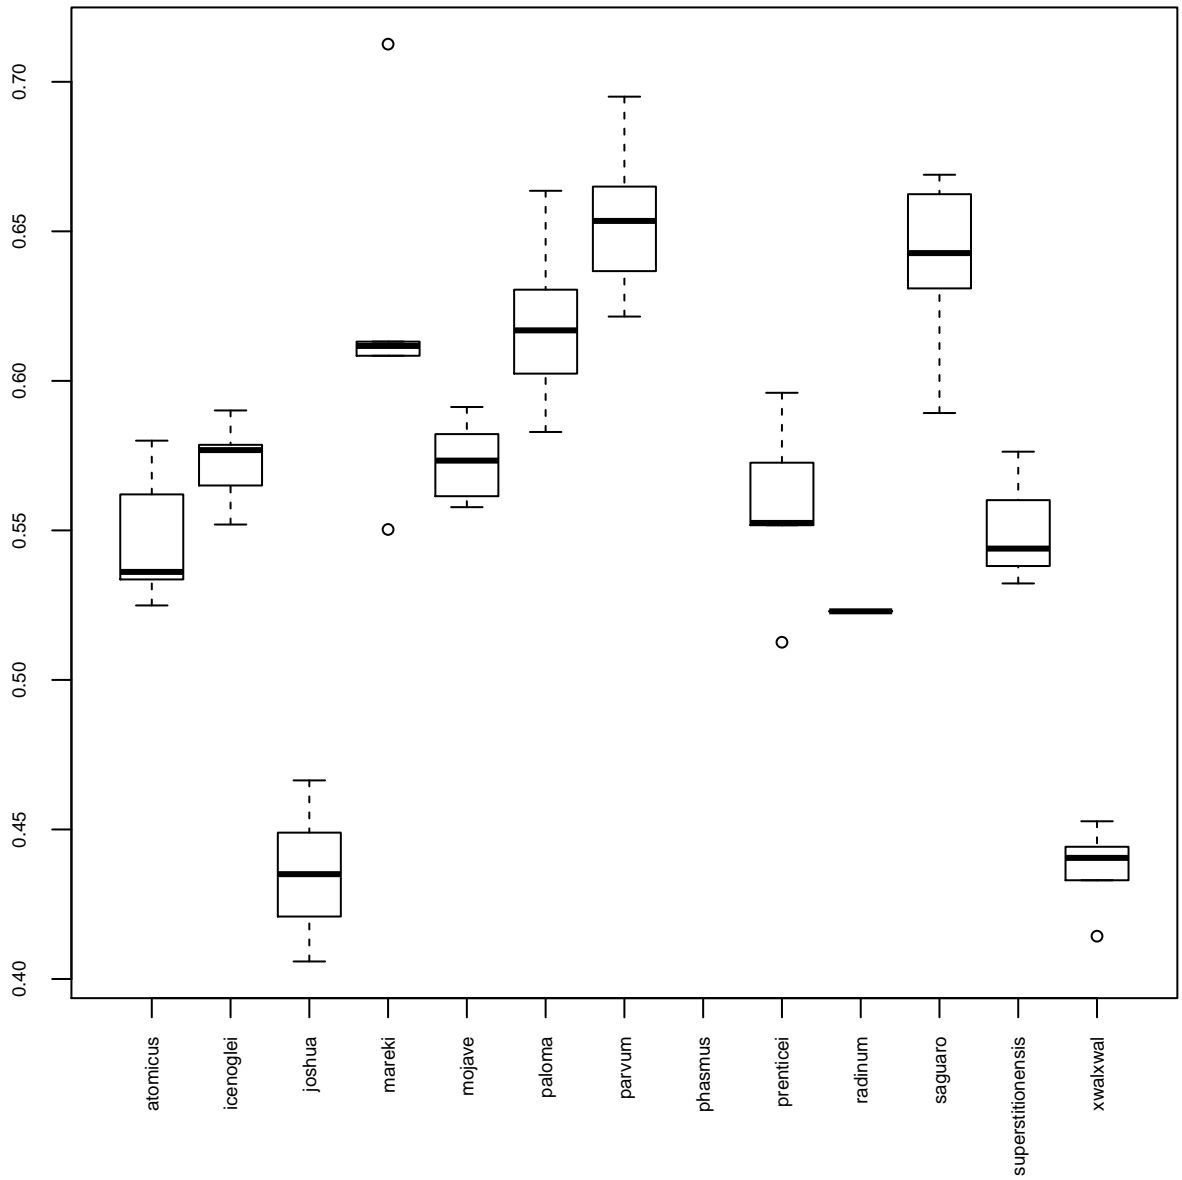

Supplement: Supplementary file 1114

## Tibia 1/Tibia 4 ratio – males

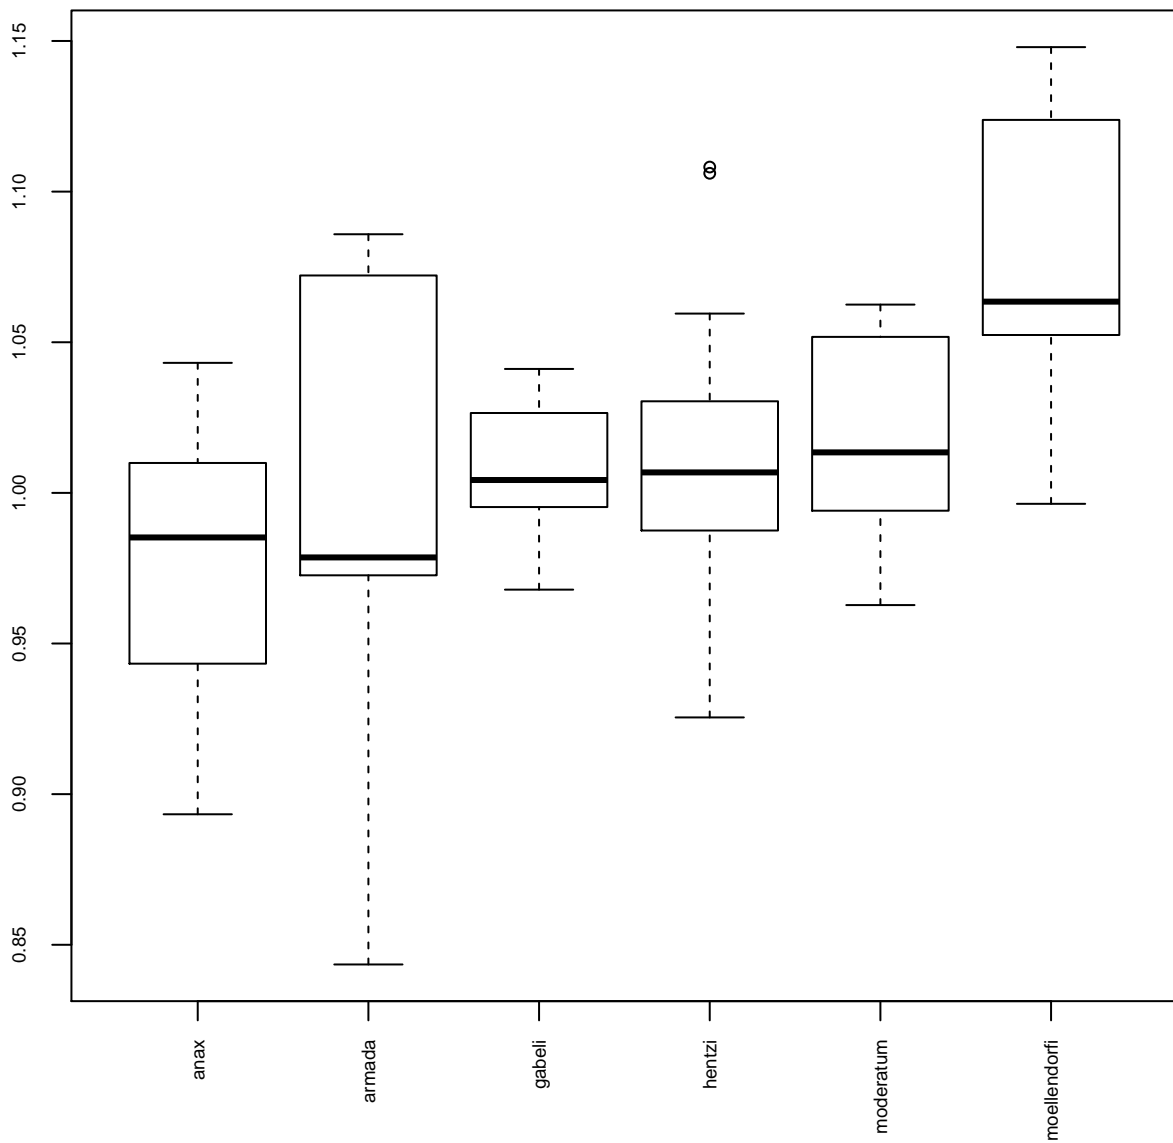

Supplement: Supplementary file 1115

# Metatarsus 1/Patella 4 Length ratio – females

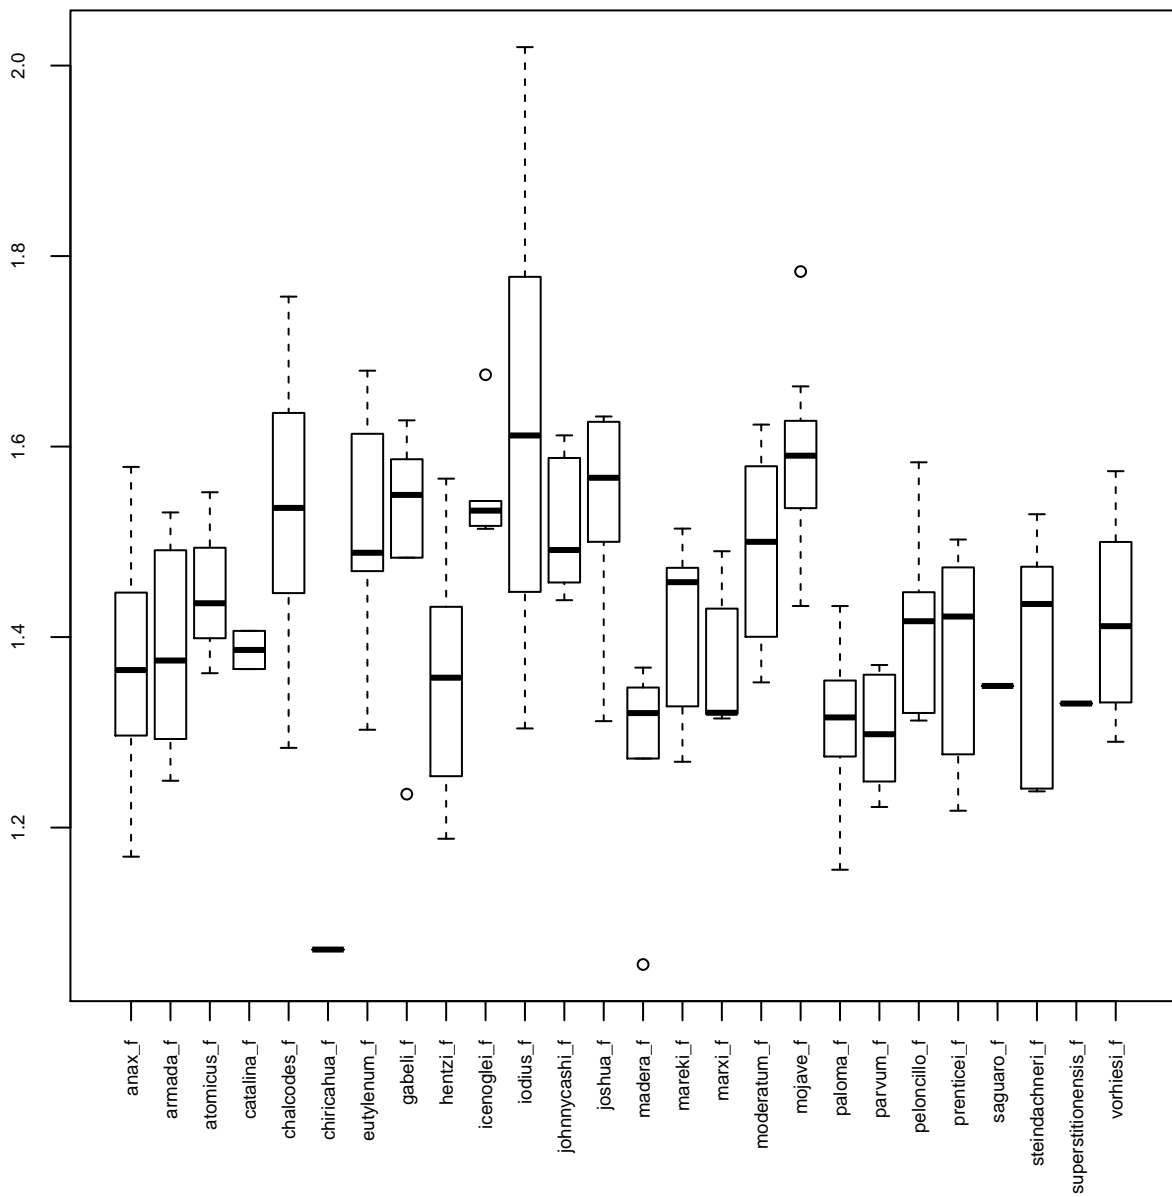

Supplement: Supplementary file 1116

## Carapace Length/Femur 1 ratio – females

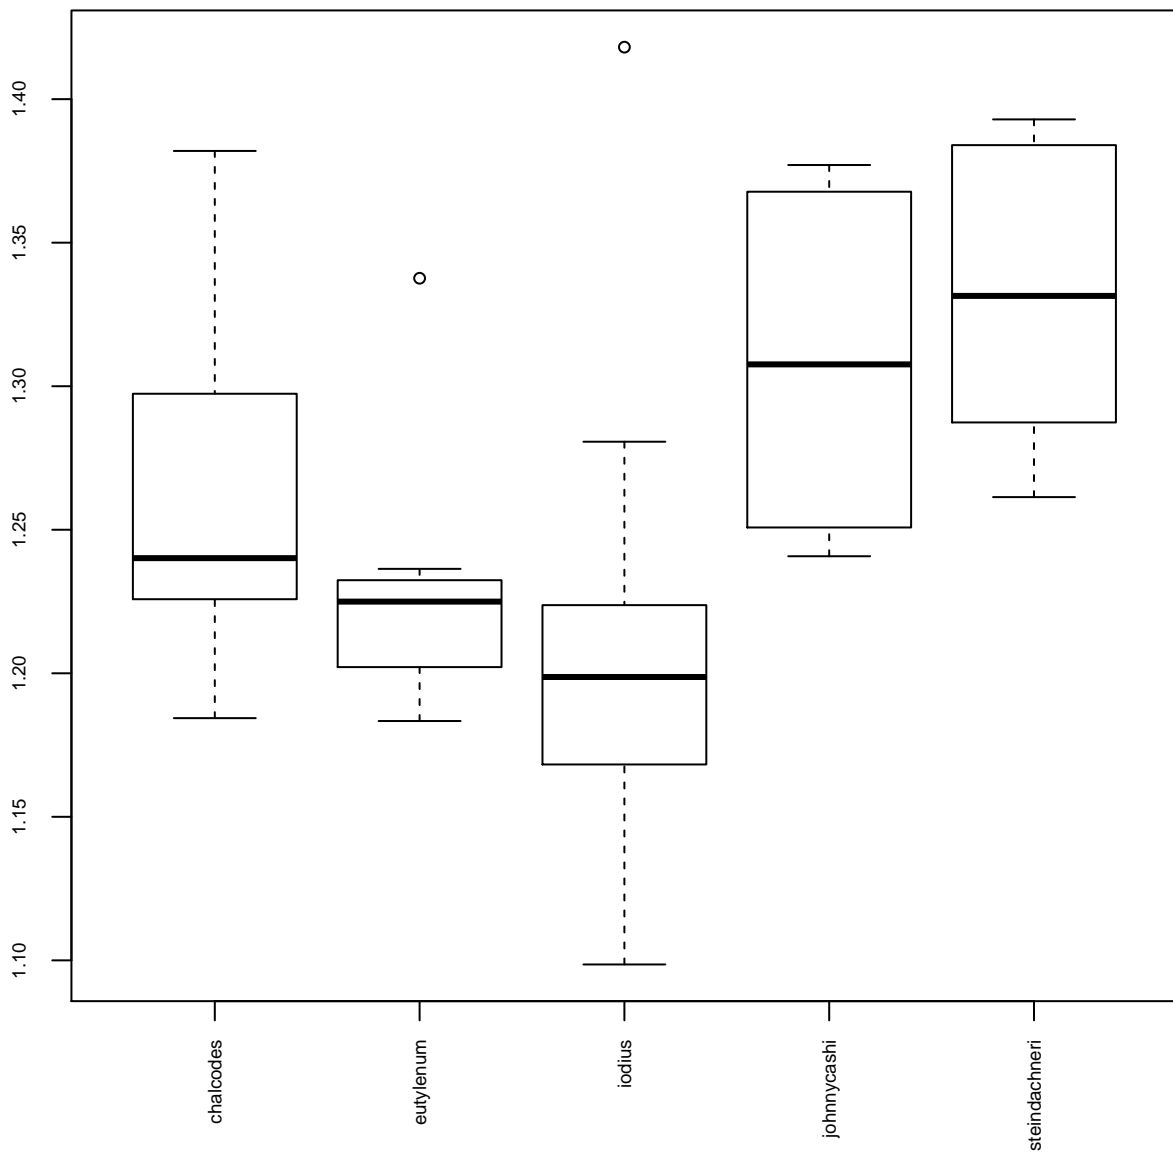

Supplement: Supplementary file 1117

## Femur 4/Patella 4 ratio – females

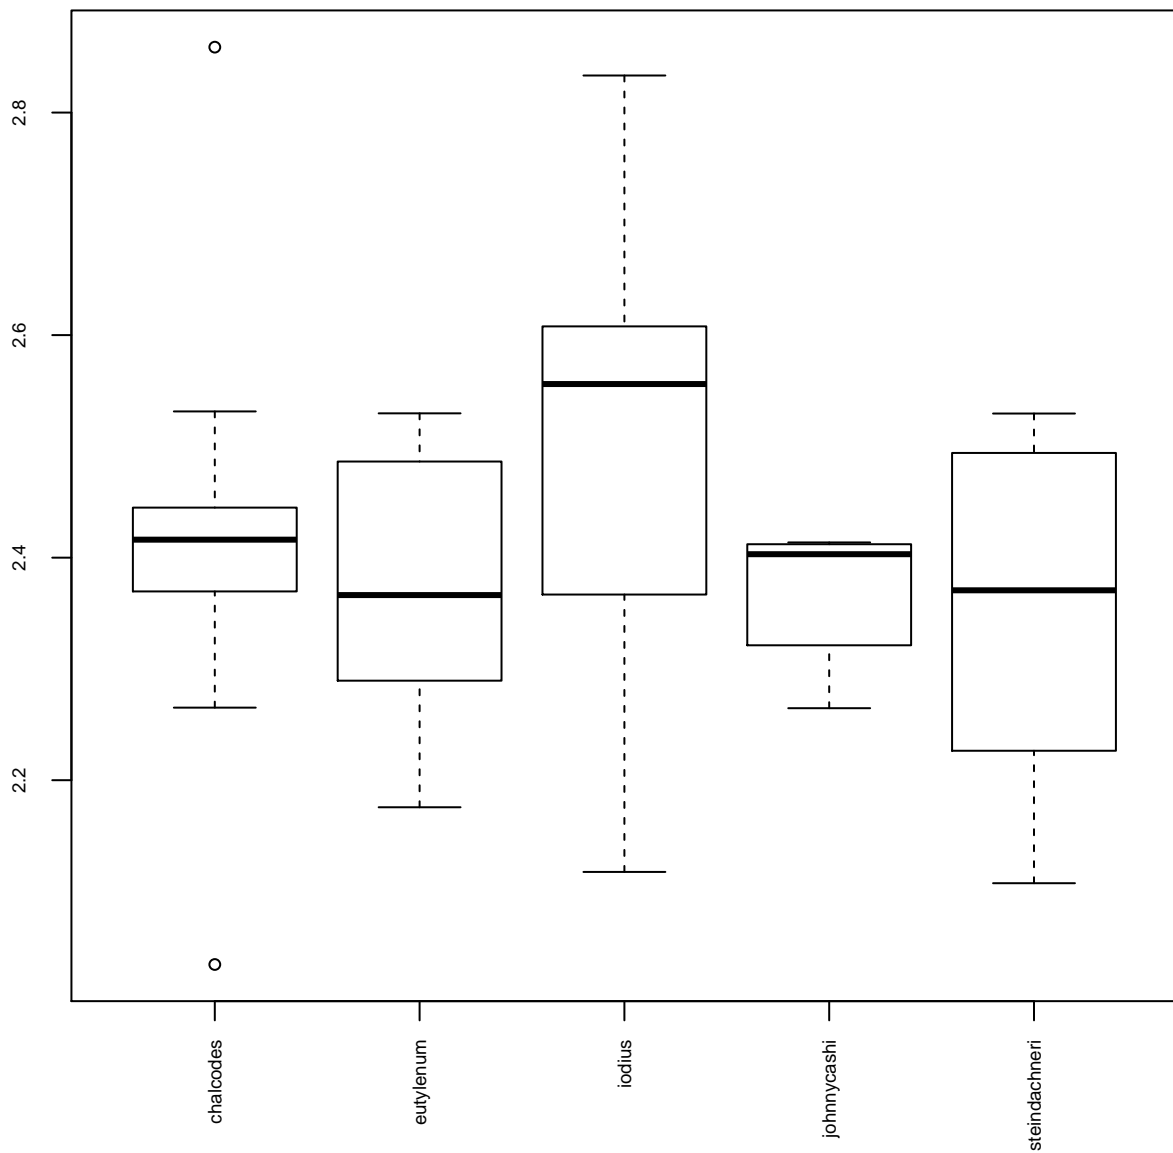

Supplement: Supplementary file 1118

# Metatarsus 3/Femur 4 Length ratio – females

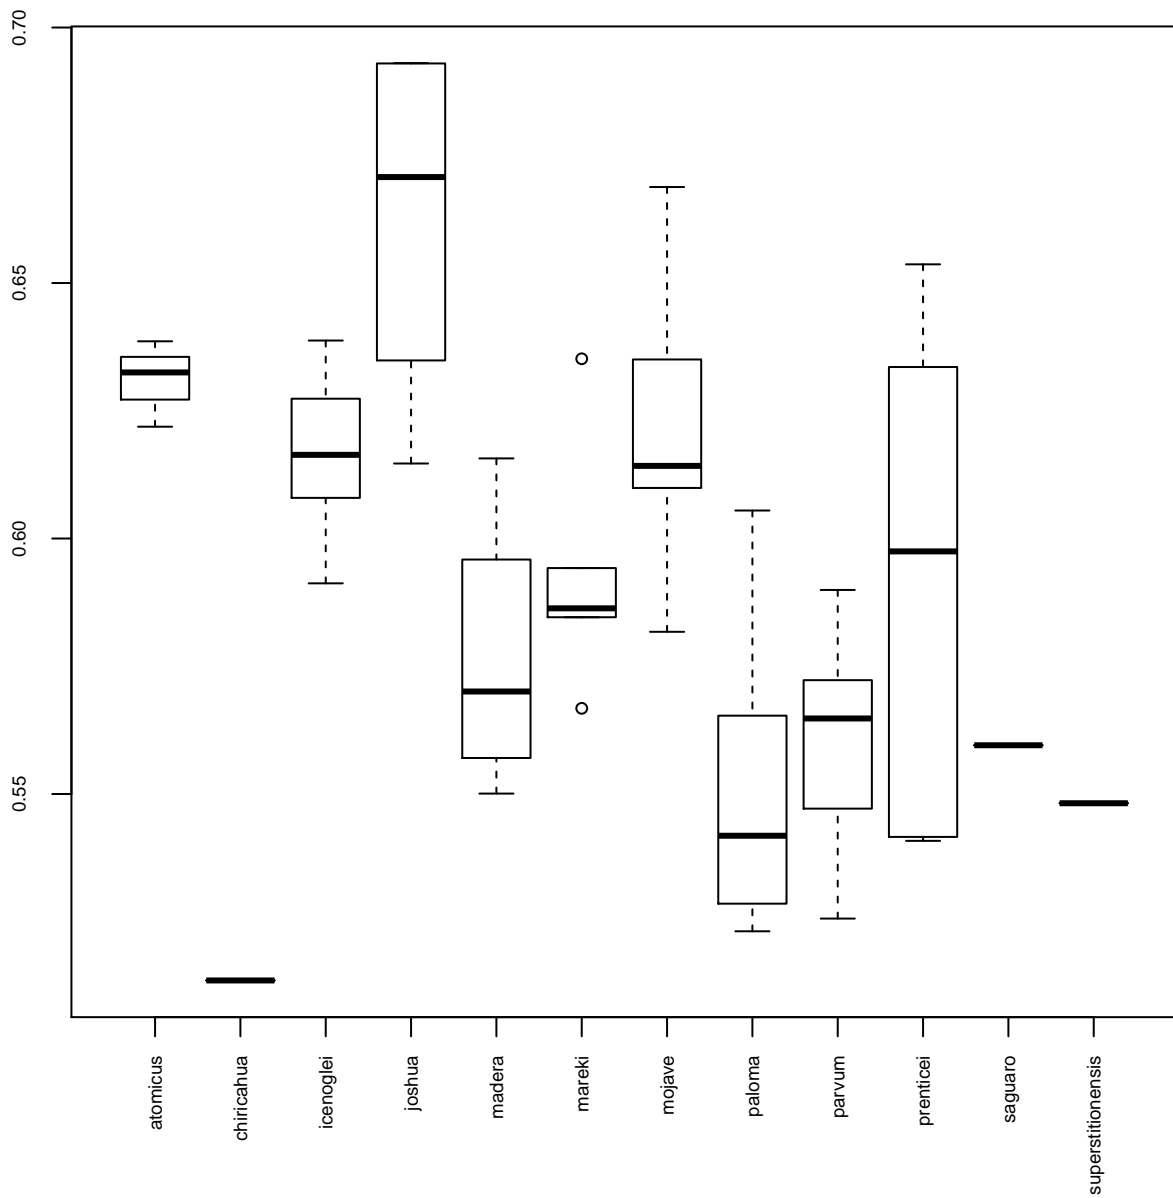

Supplement: Supplementary file 1119

## Tarsus 1/Tarsus 4 ratio – females

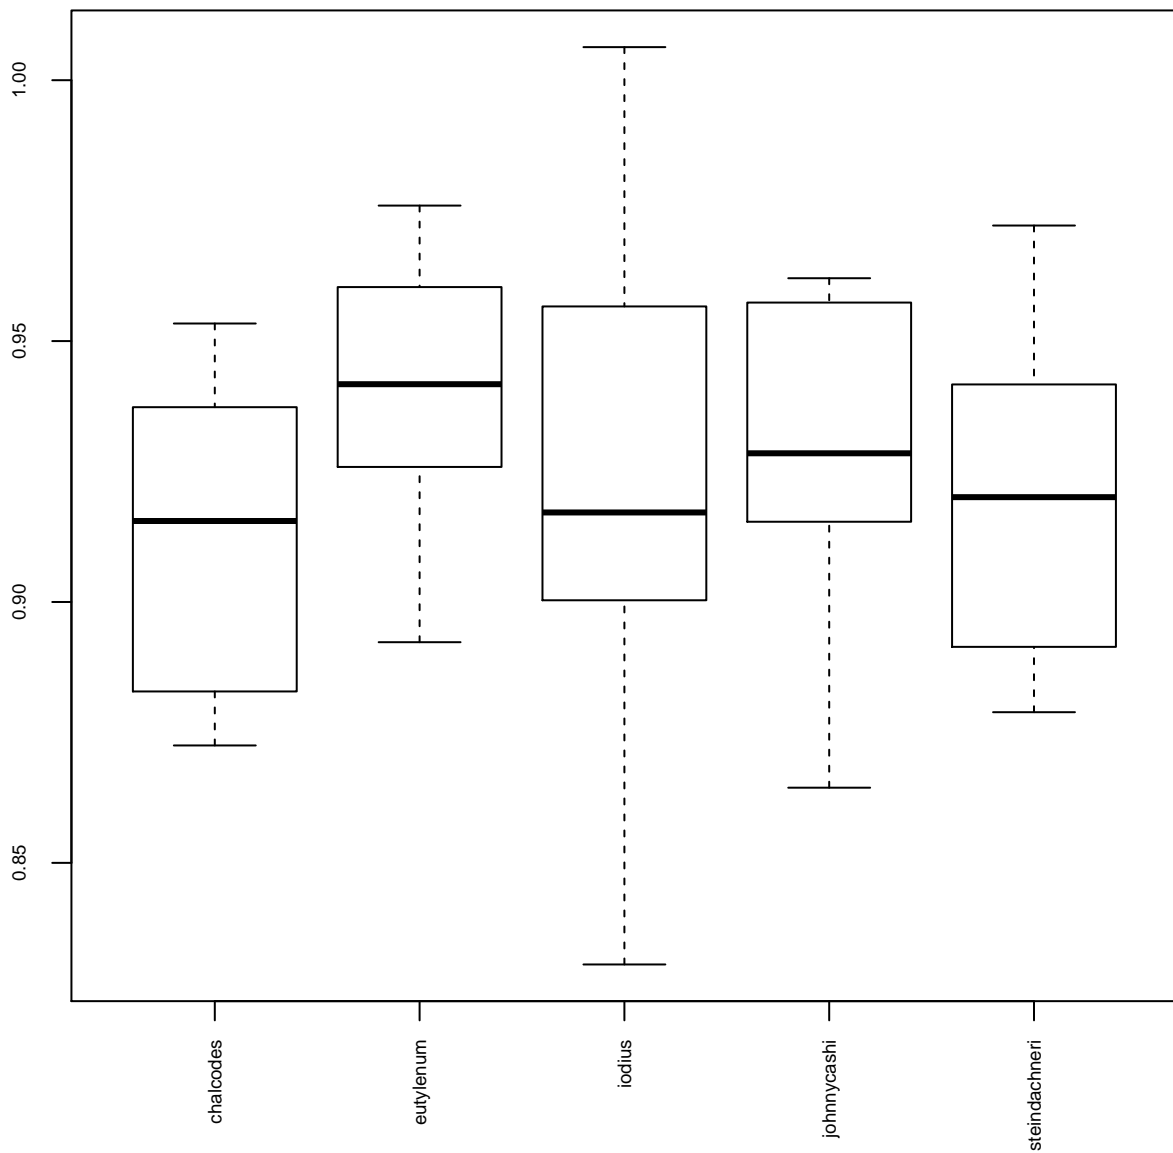

Supplement: Supplementary file 1120

## Tibia 3/Femur 4 Length ratio – females

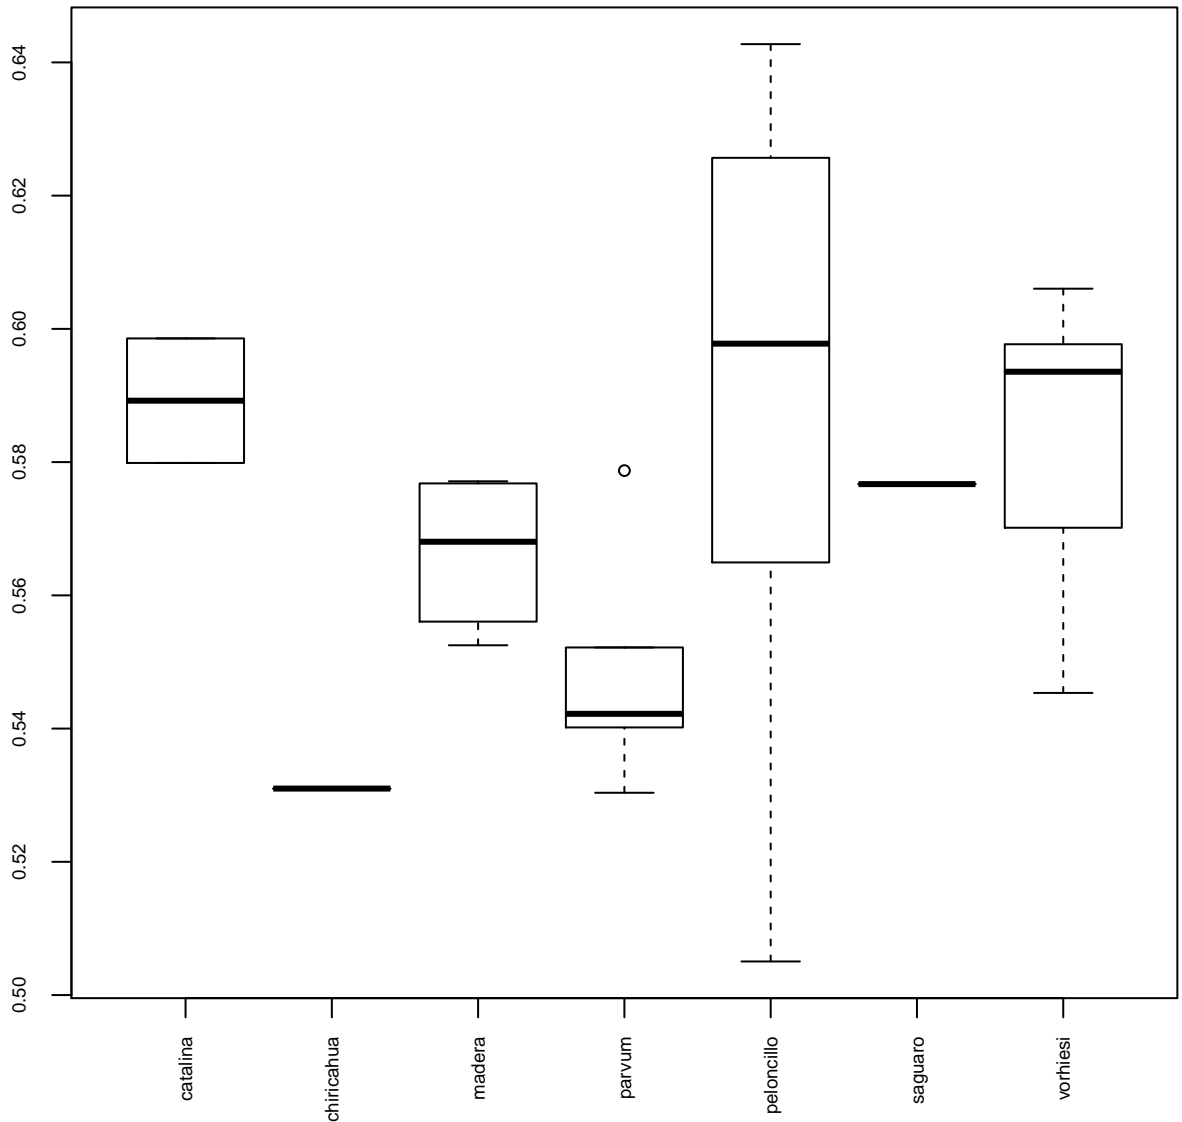

Supplement: Supplementary file 1121

## Metatarsus 1/Femur 3 Length ratio – males

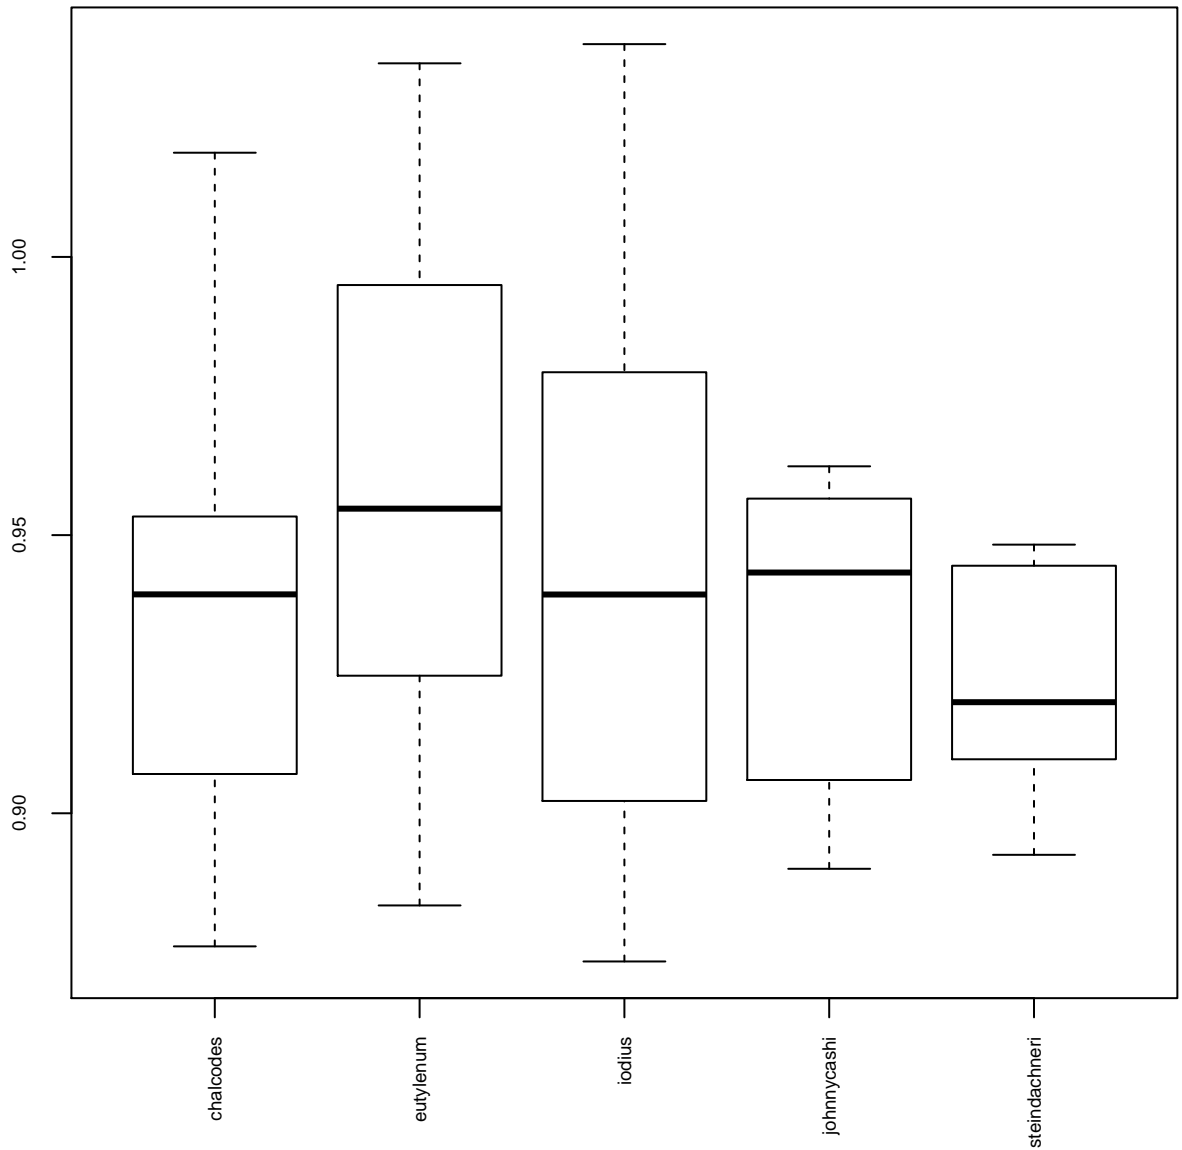

Supplement: Supplementary file 1122

## Leg 4 Length/Carapace Length ratio – males

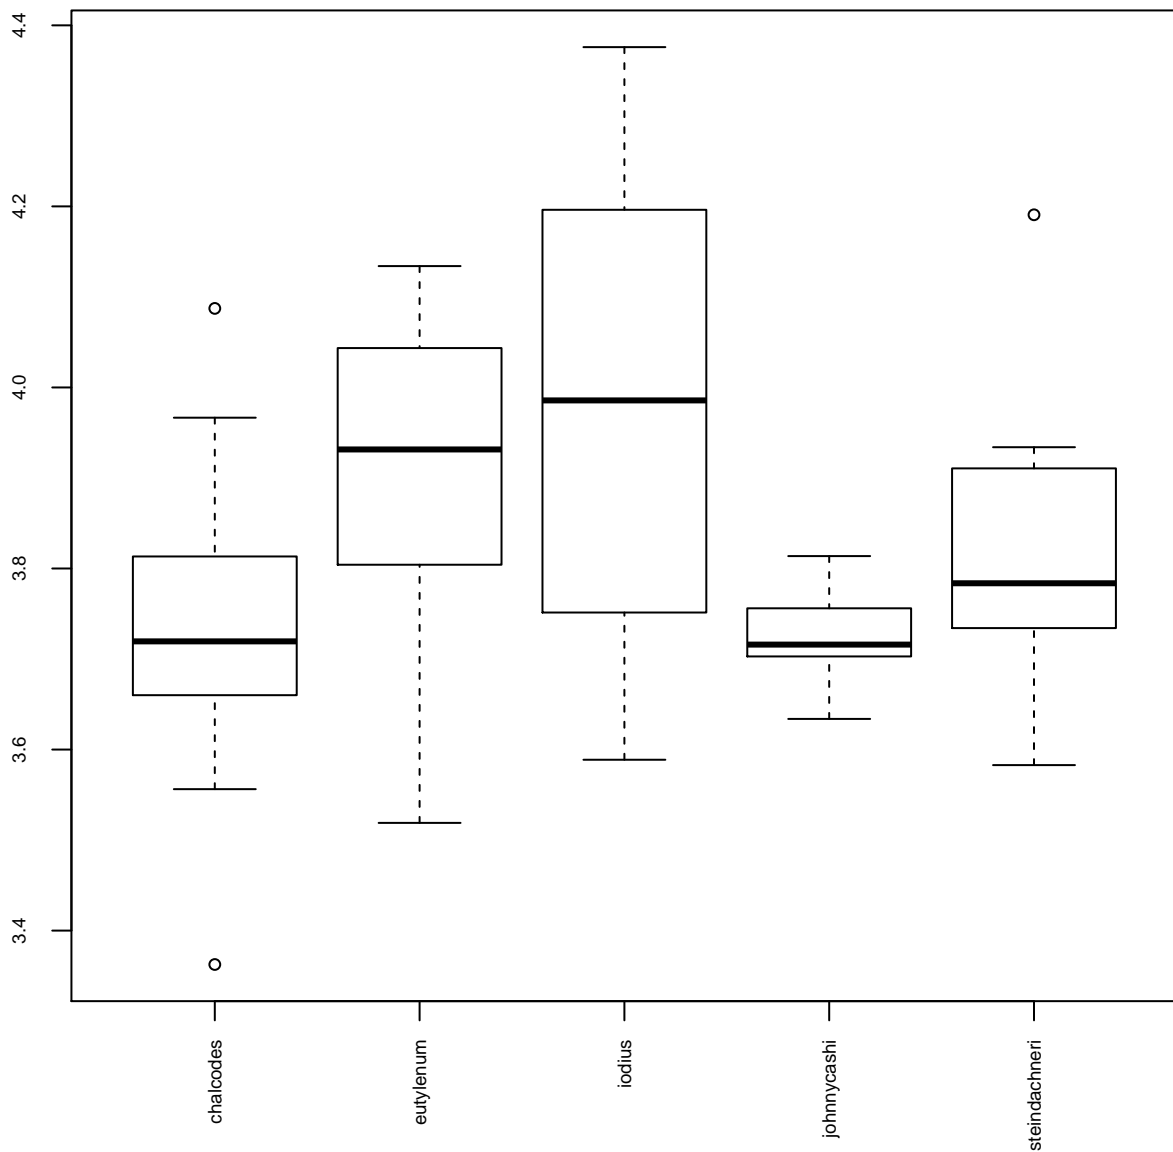

Supplement: Supplementary file 1123

# Femur 1/Metatarsus 3 ratio – females

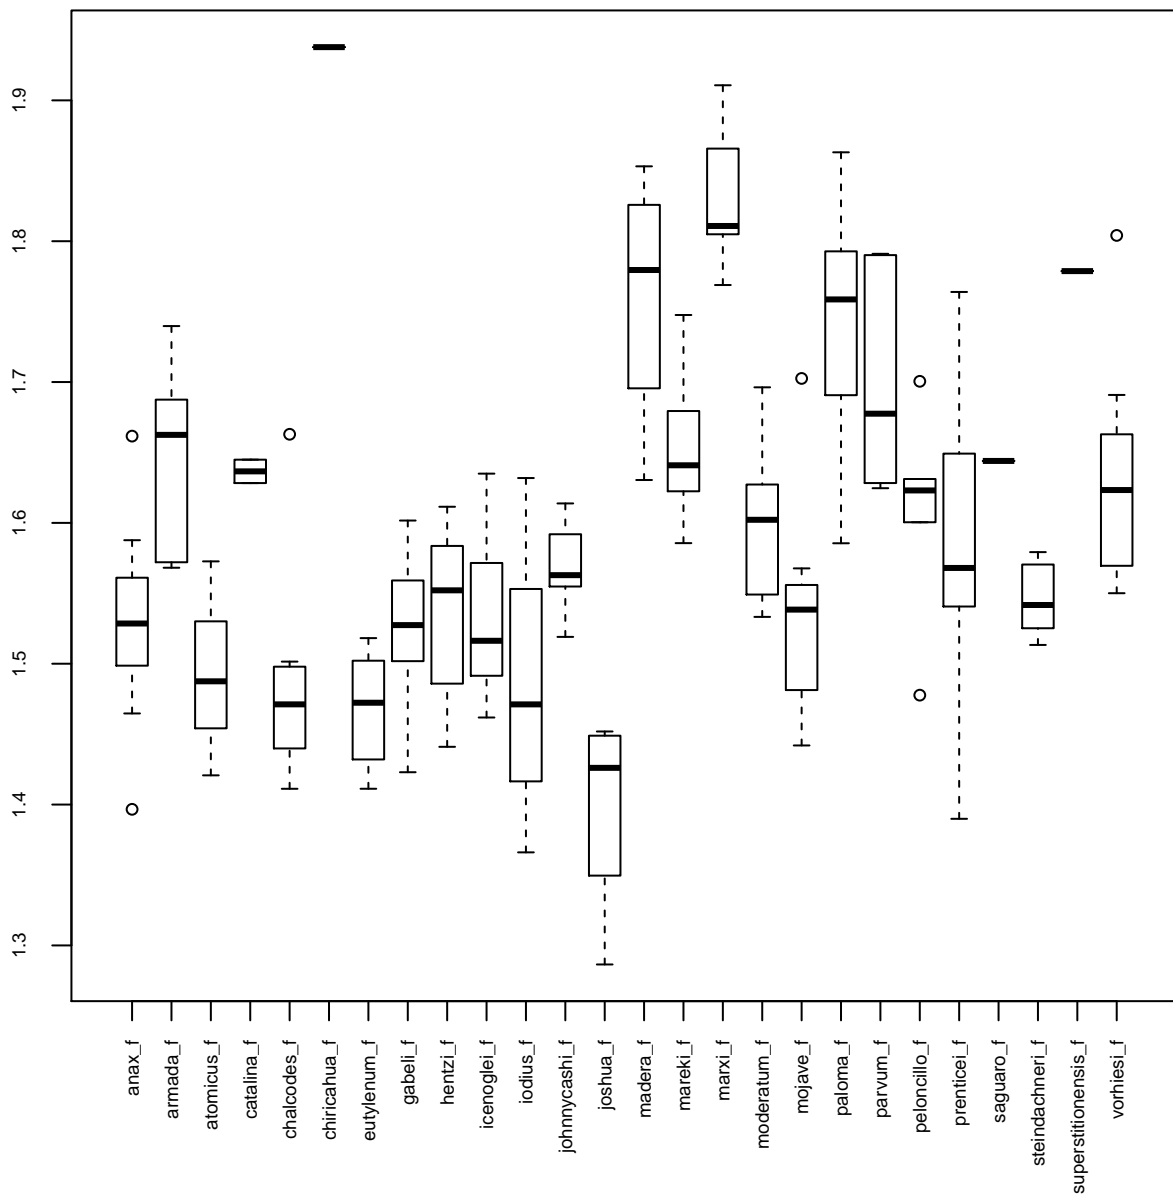

Supplement: Supplementary file 1124

## Femur 4 Length/Width ratio – females

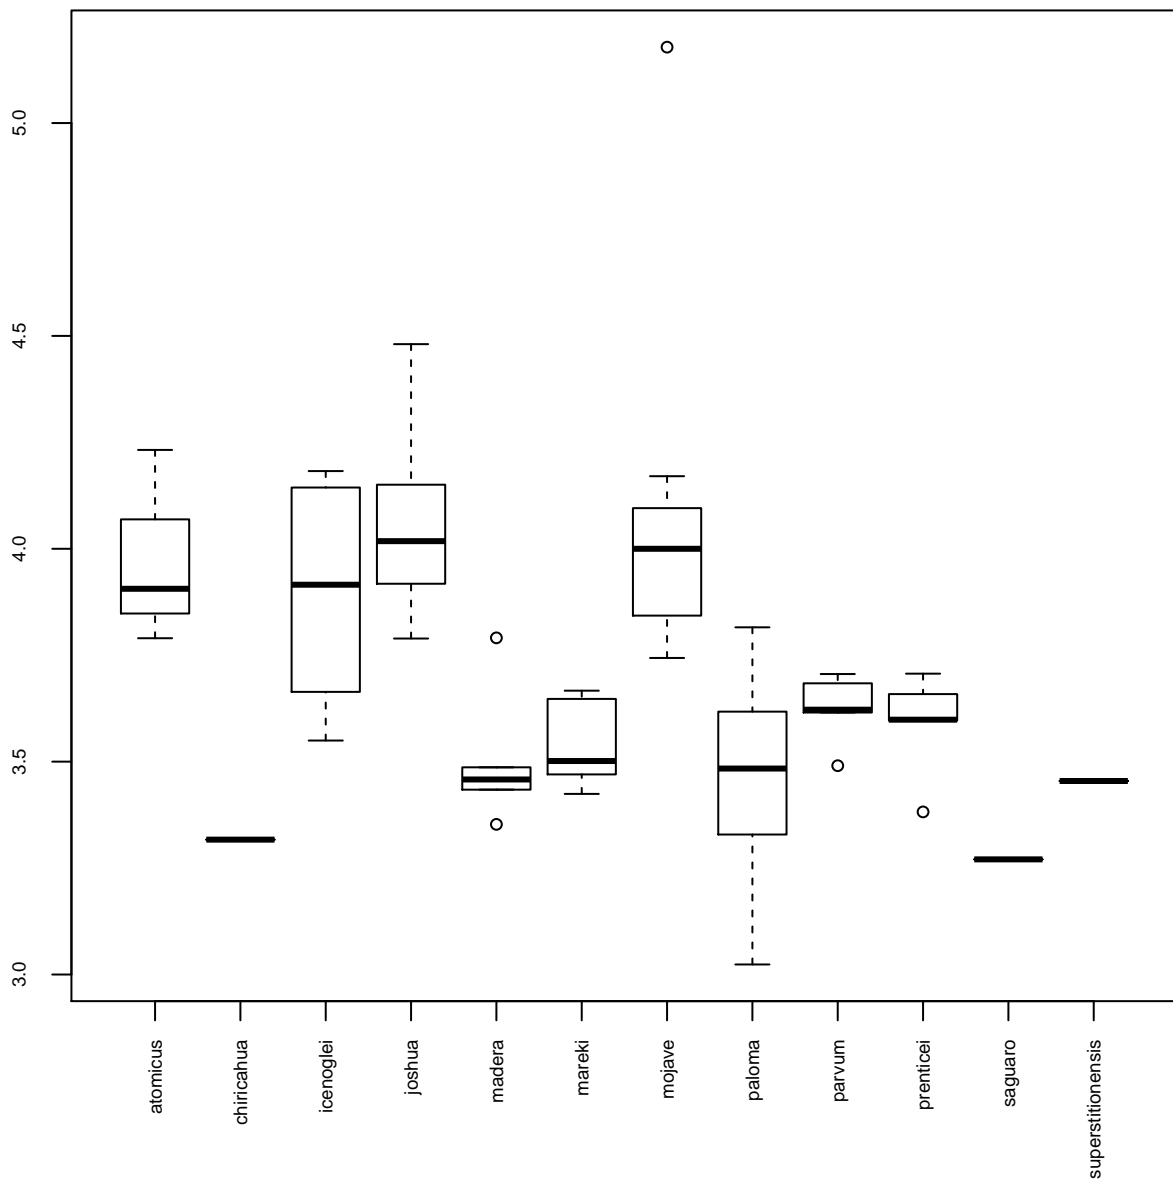

Supplement: Supplementary file 1125

## Metatarsus 1/Tarsus 1 ratio – females

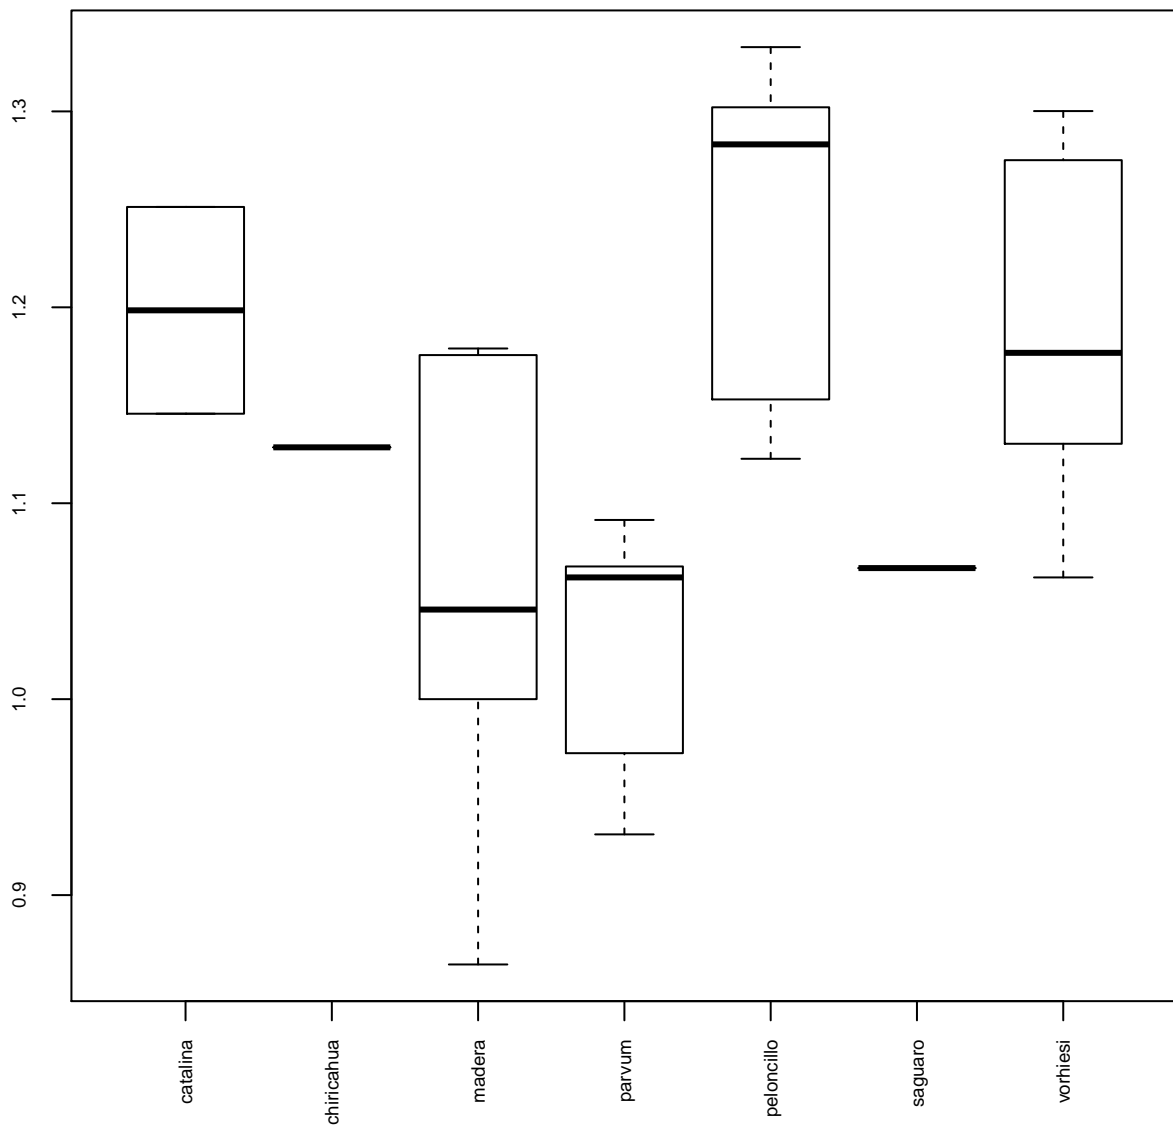

Supplement: Supplementary file 1126

# Femur 3/Tarsus 3 ratio – males

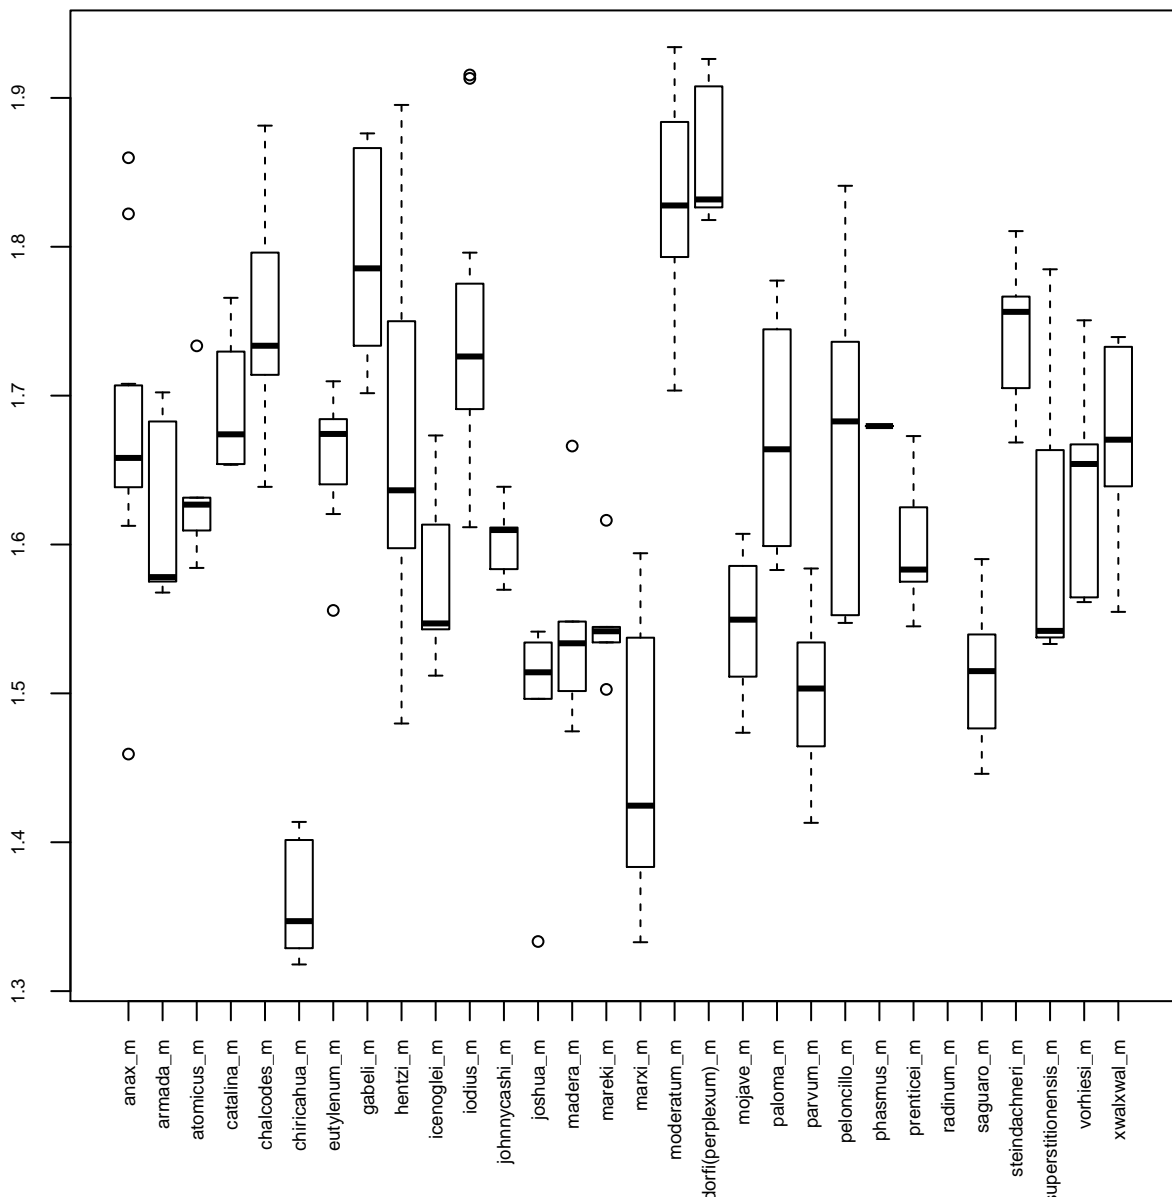

Supplement: Supplementary file 1127

## Femur 3/Metatarsus 3 ratio – males

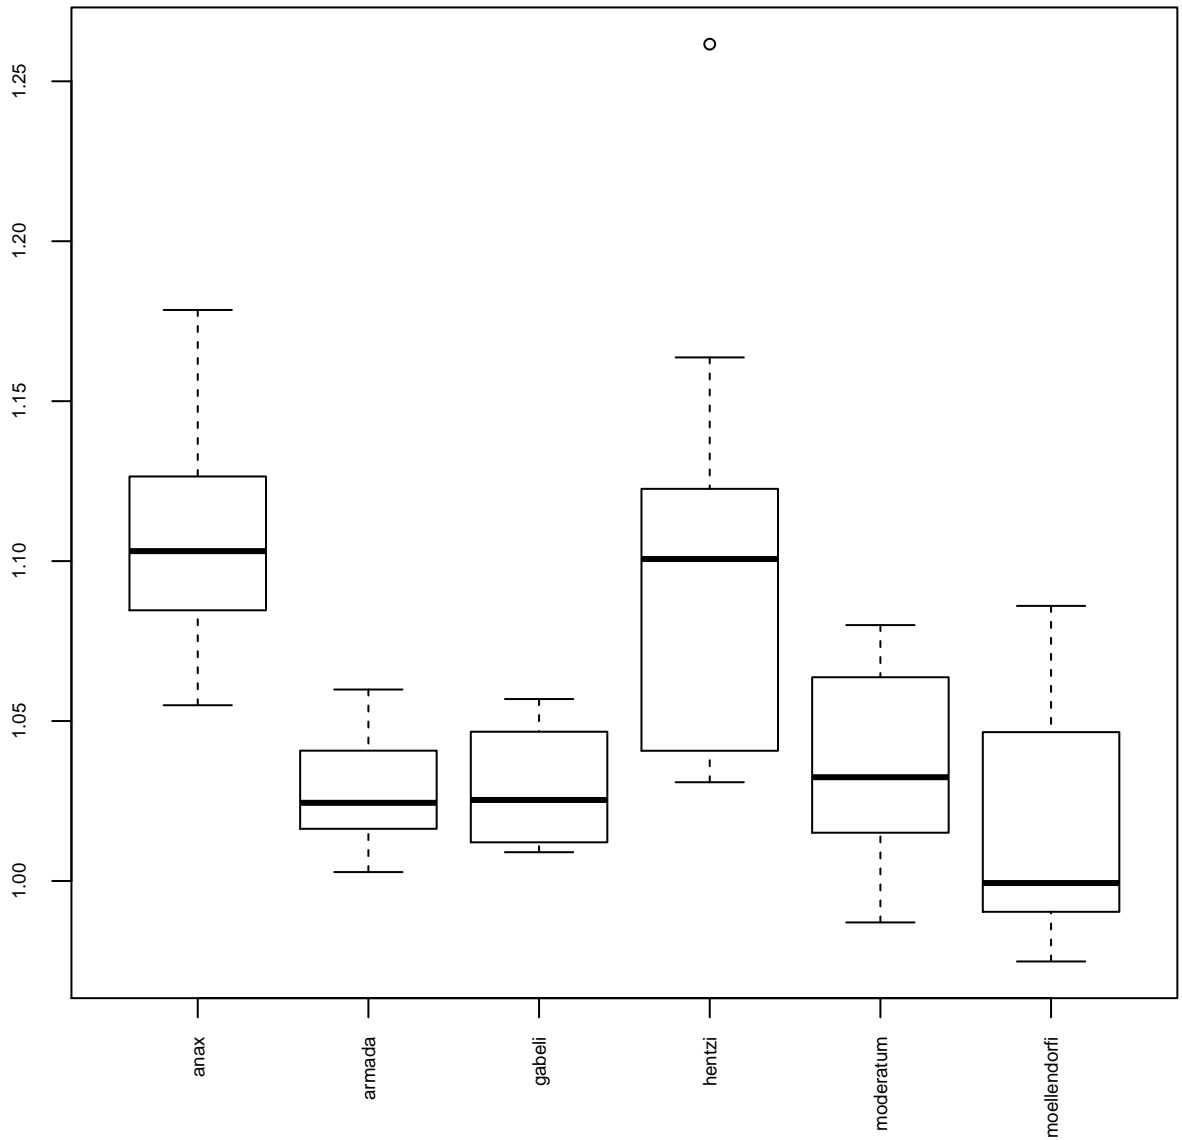

Supplement: Supplementary file 1128

## Patella 4/Tarsus 4 ratio – females

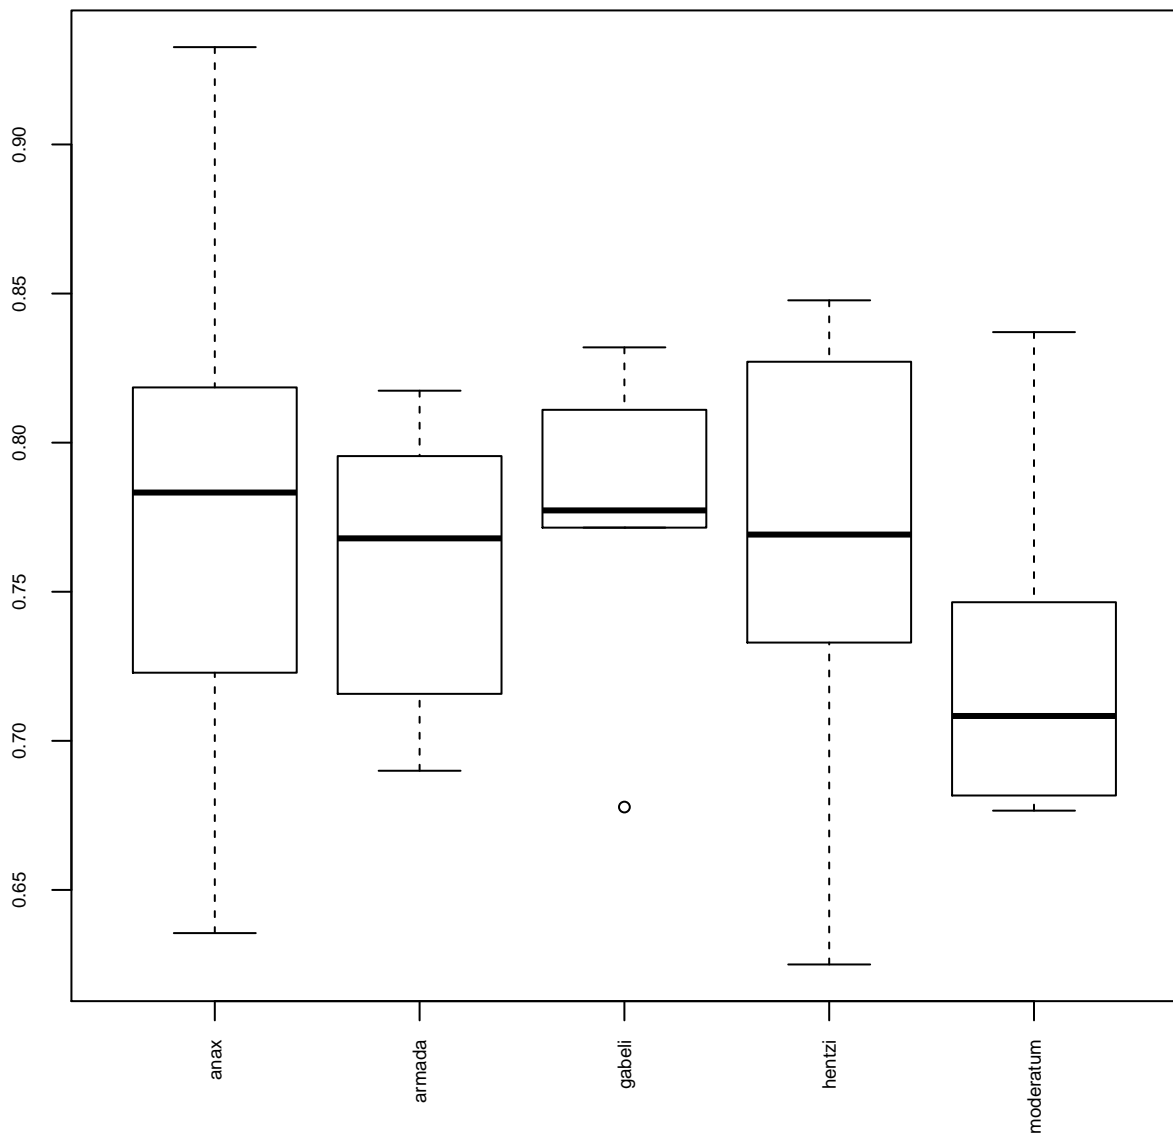

Supplement: Supplementary file 1129

## Leg 3 Length – males

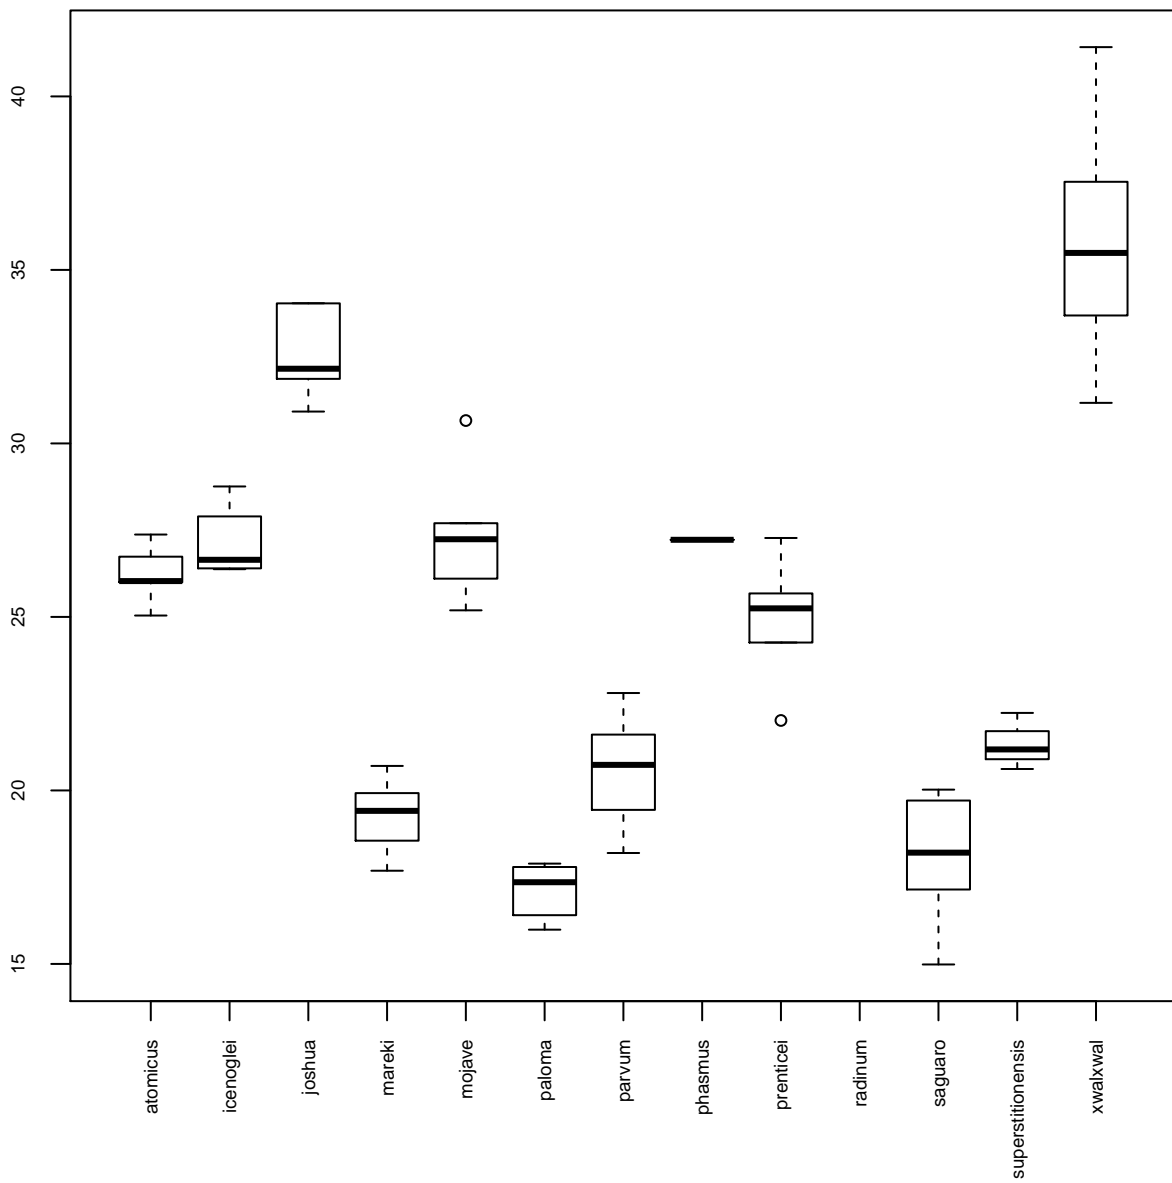

Supplement: Supplementary file 1130

# Patella 3/Tibia 4 Length ratio – females

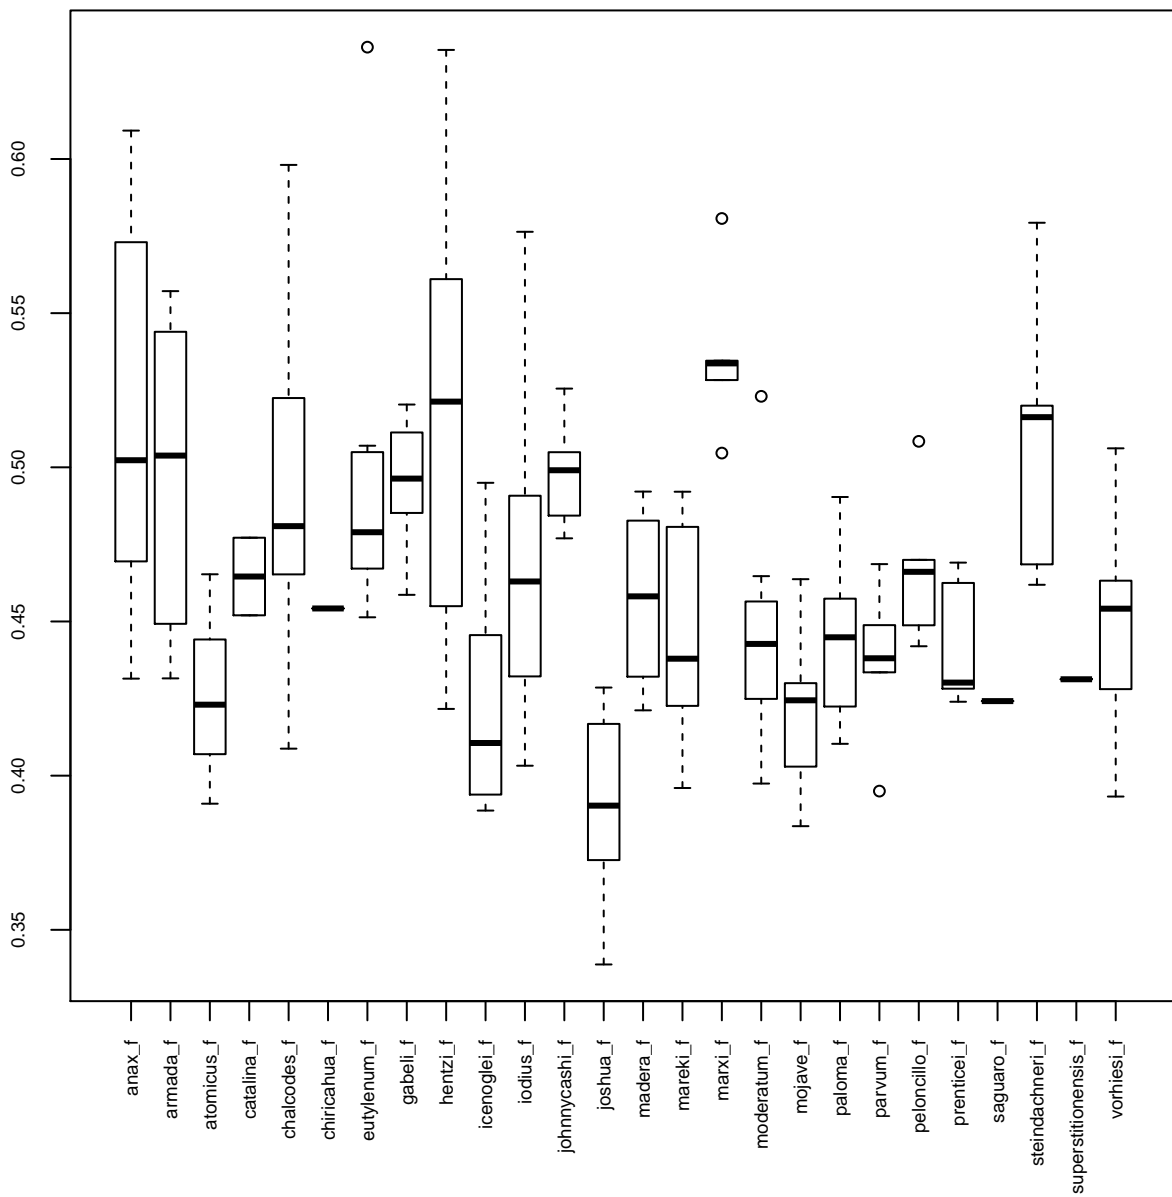

Supplement: Supplementary file 1131

## Labial Length/Width ratio – females

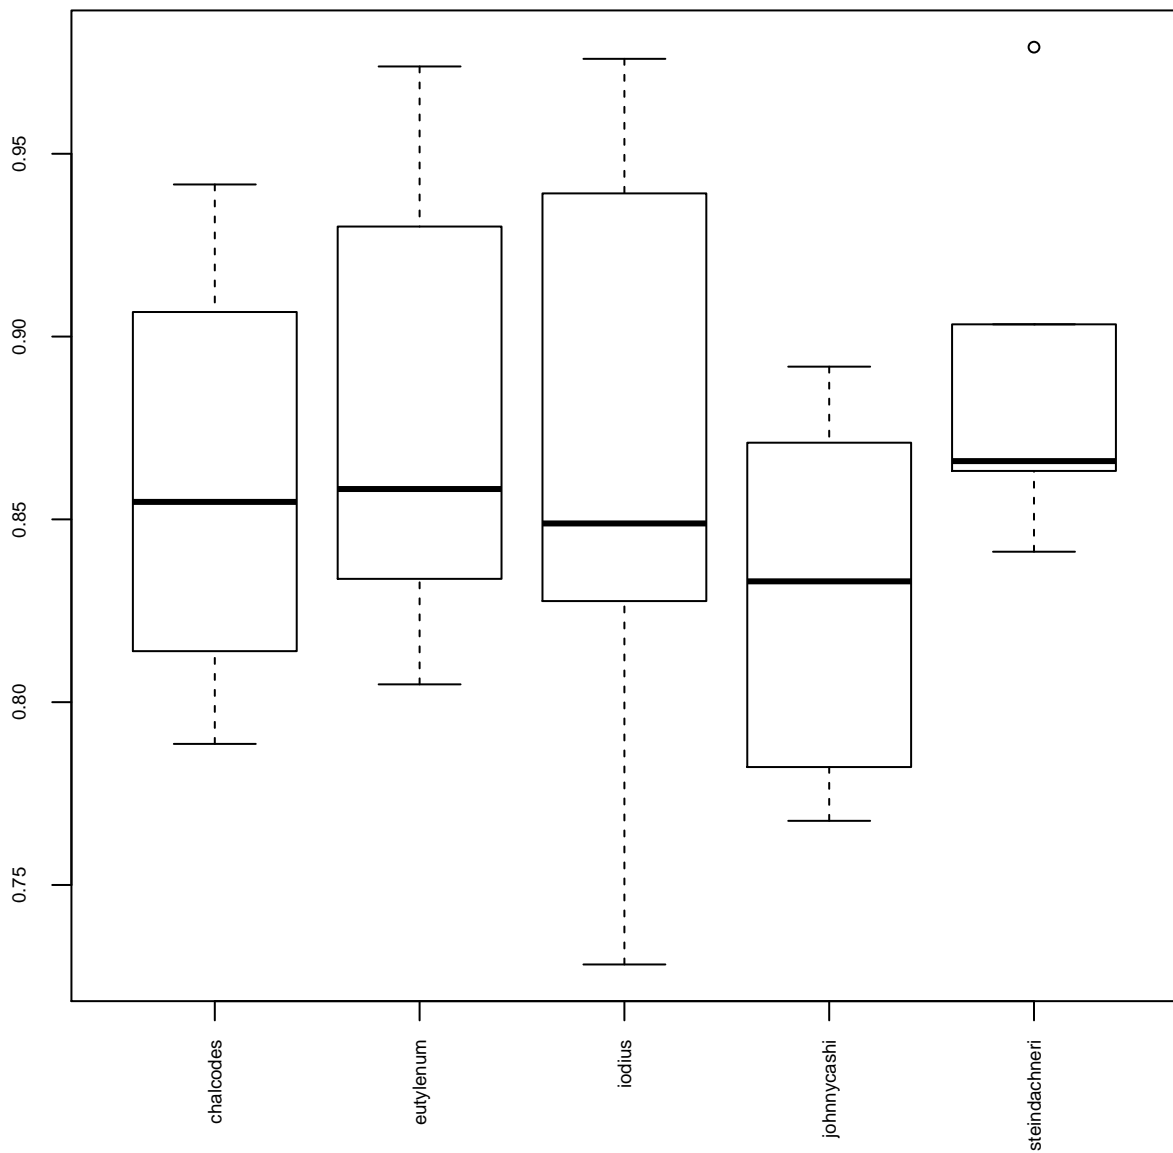

Supplement: Supplementary file 1132

# Tibia 3/Metatarsus 3 ratio – females

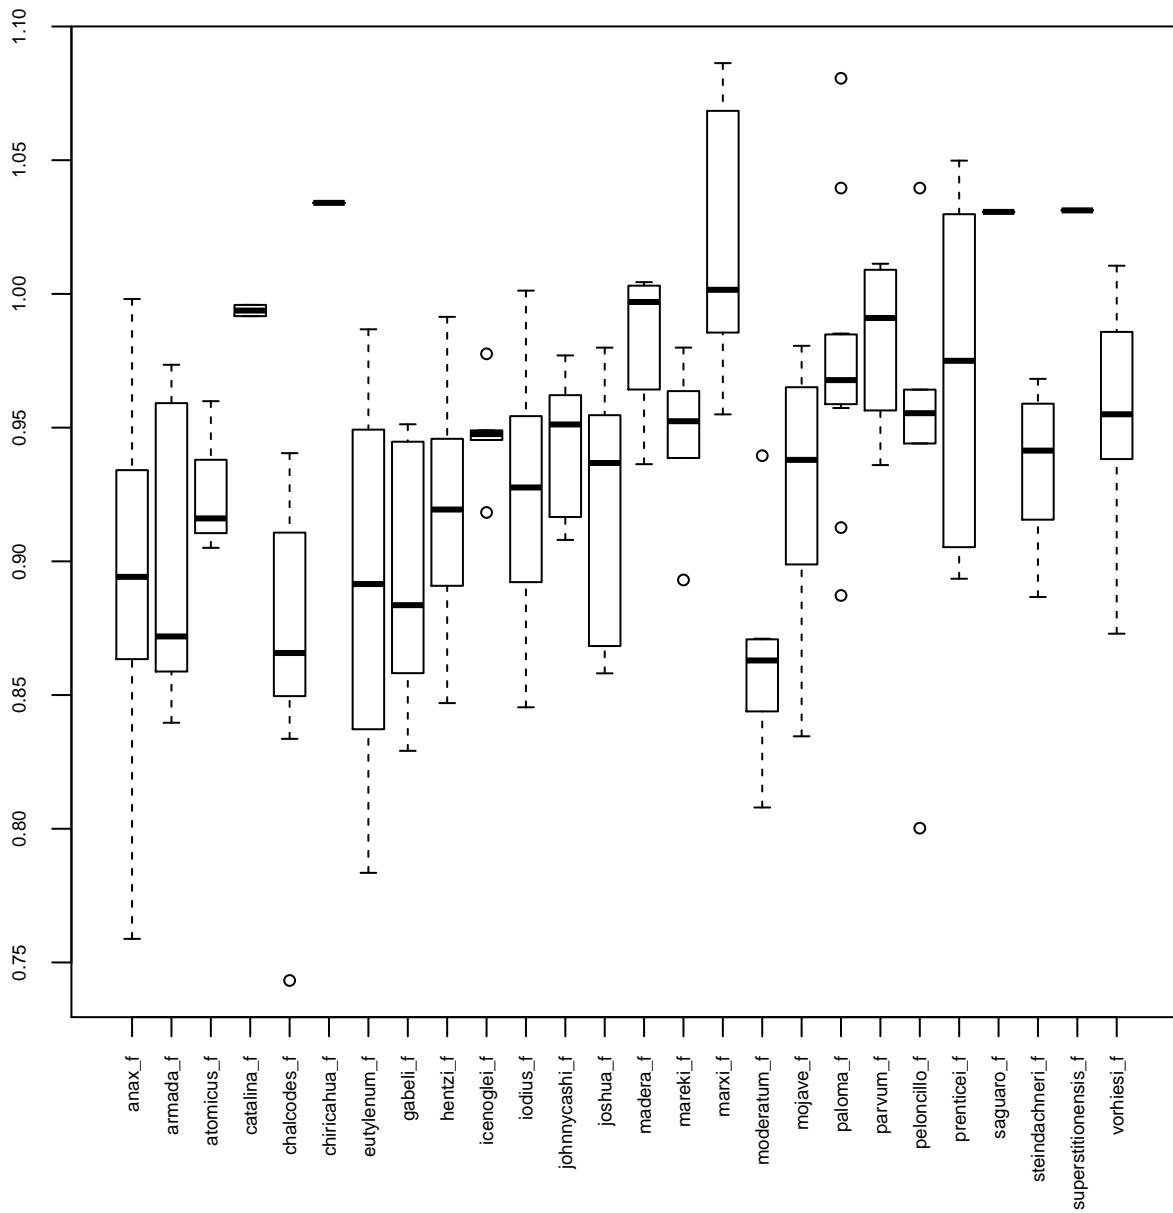

Supplement: Supplementary file 1133

## Carapace Width – females

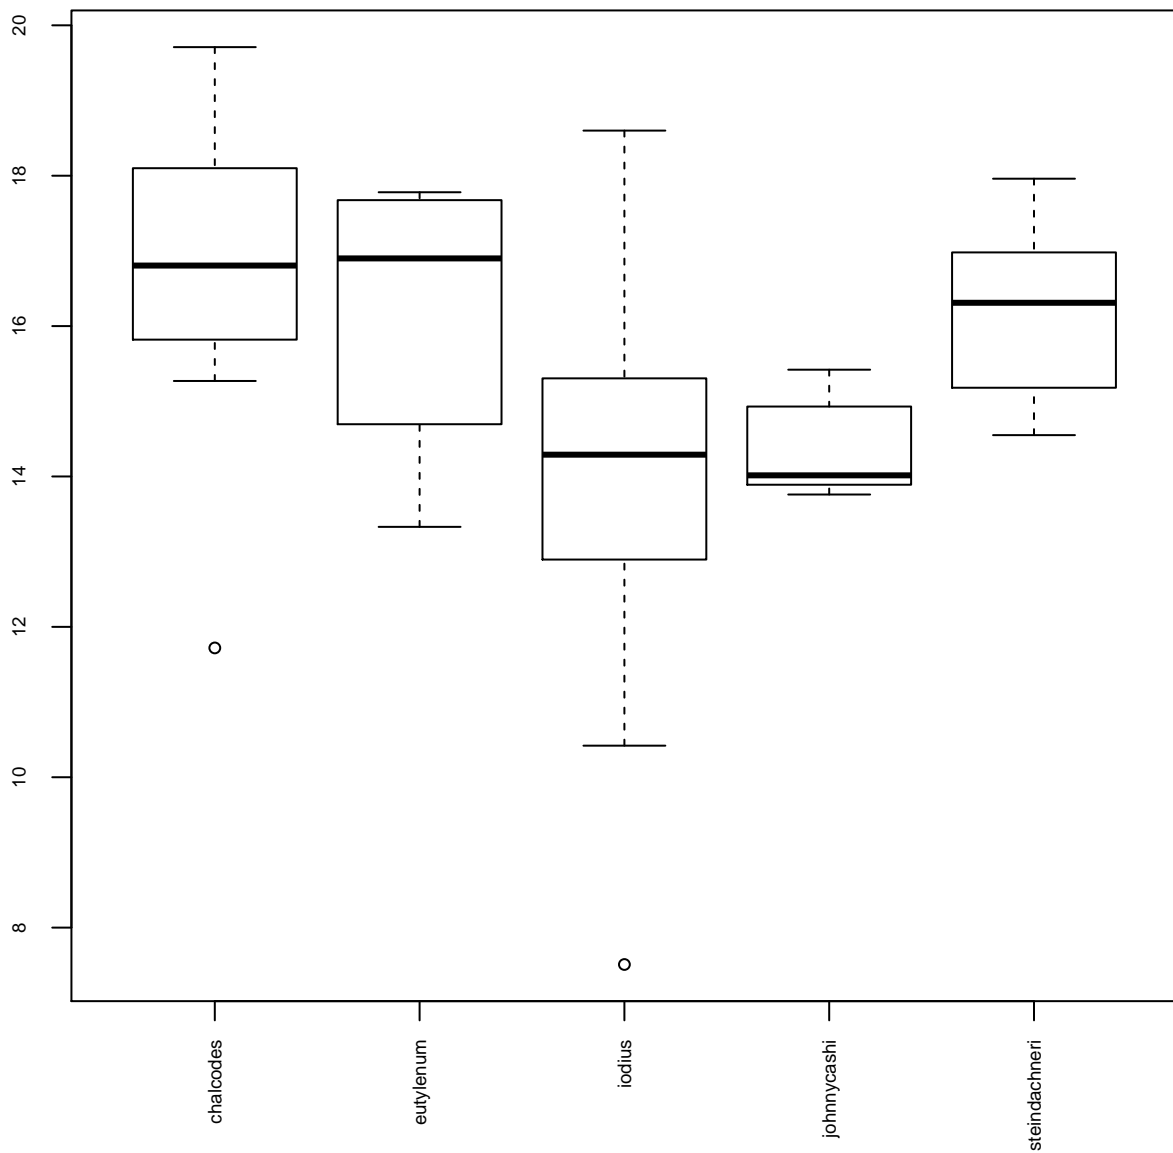

Supplement: Supplementary file 1134

## Tibia 1/Femur 4 Length ratio – females

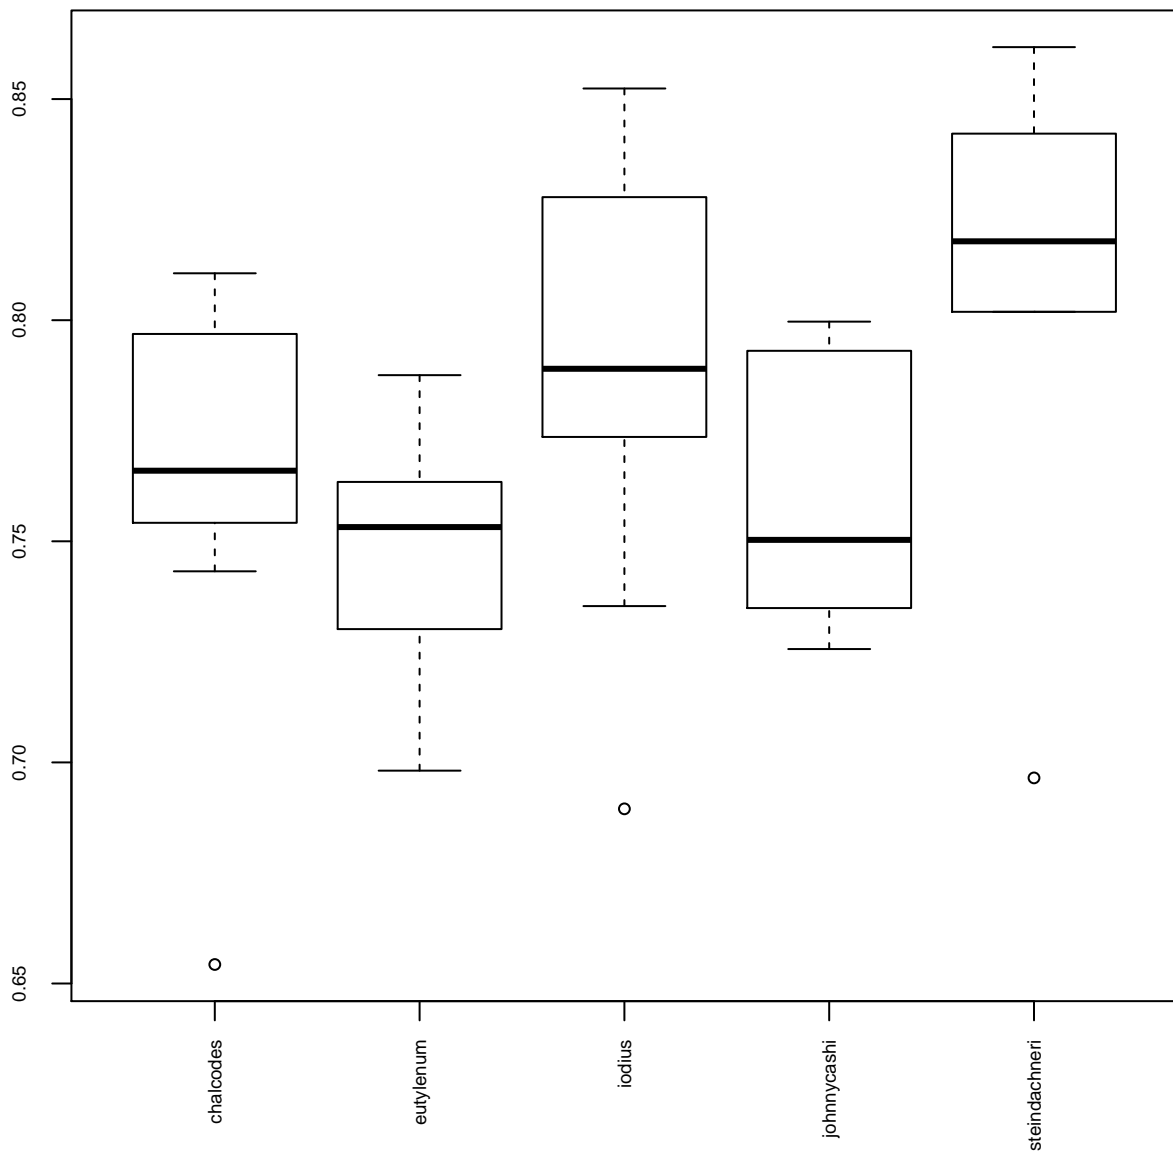

Supplement: Supplementary file 1135

# Femur 1 Length/Width ratio – males

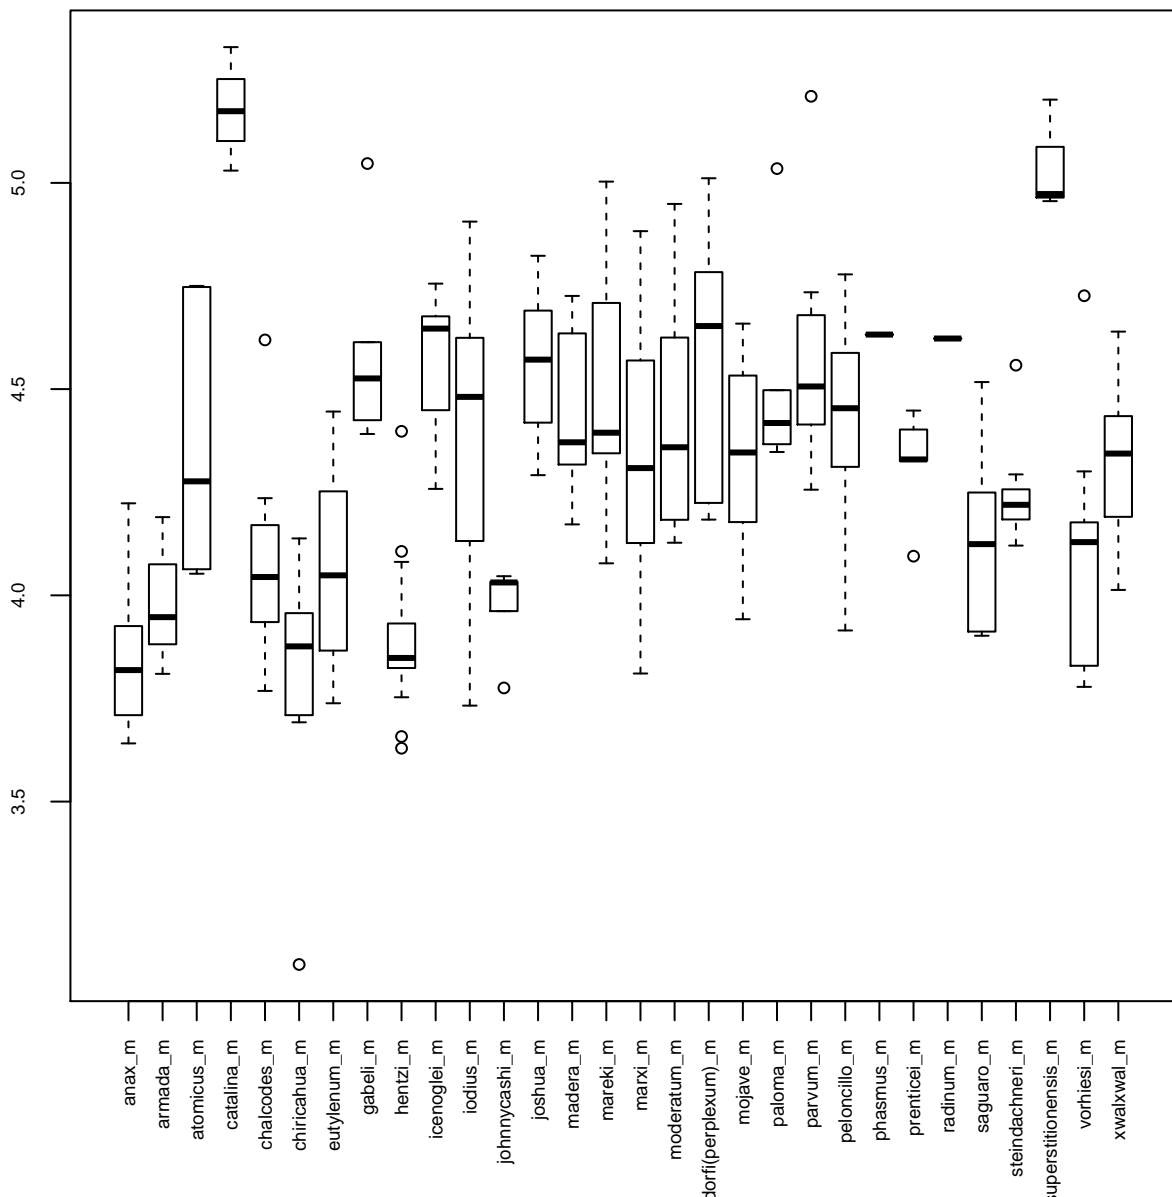

Supplement: Supplementary file 1136

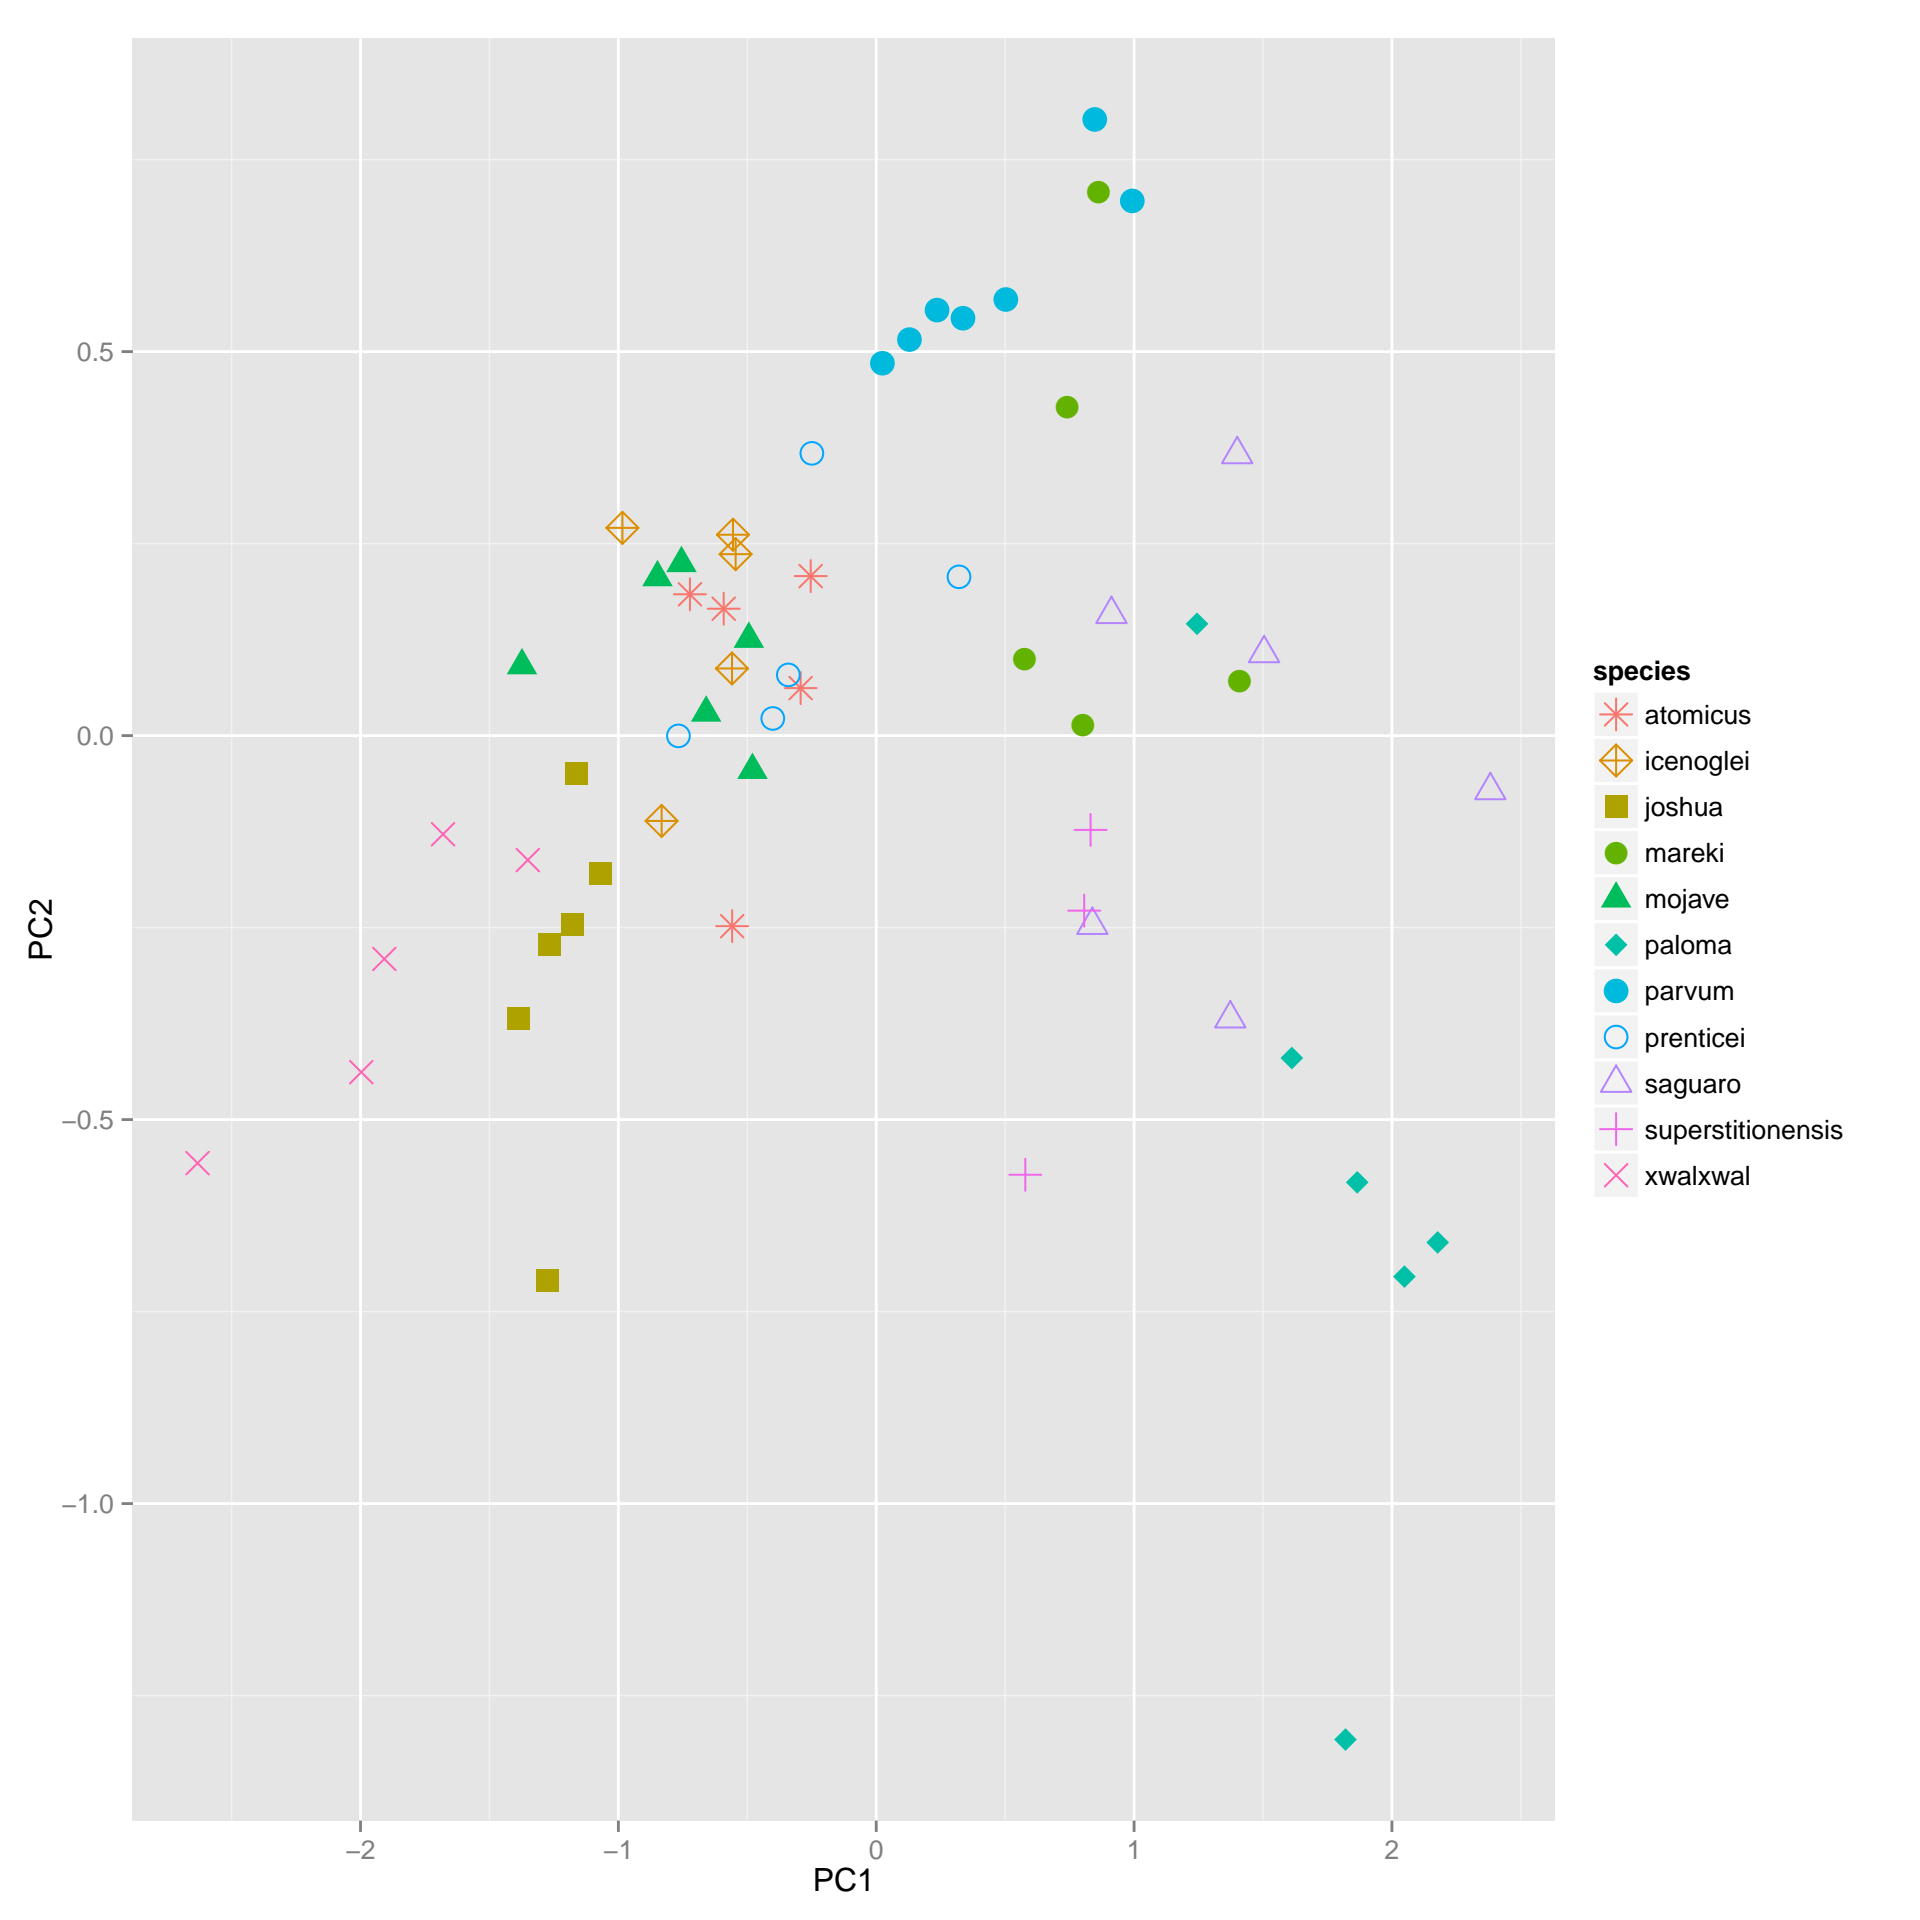

Supplement: Supplementary file 1137

# Metatarsus 4/Tarsus 4 ratio – females

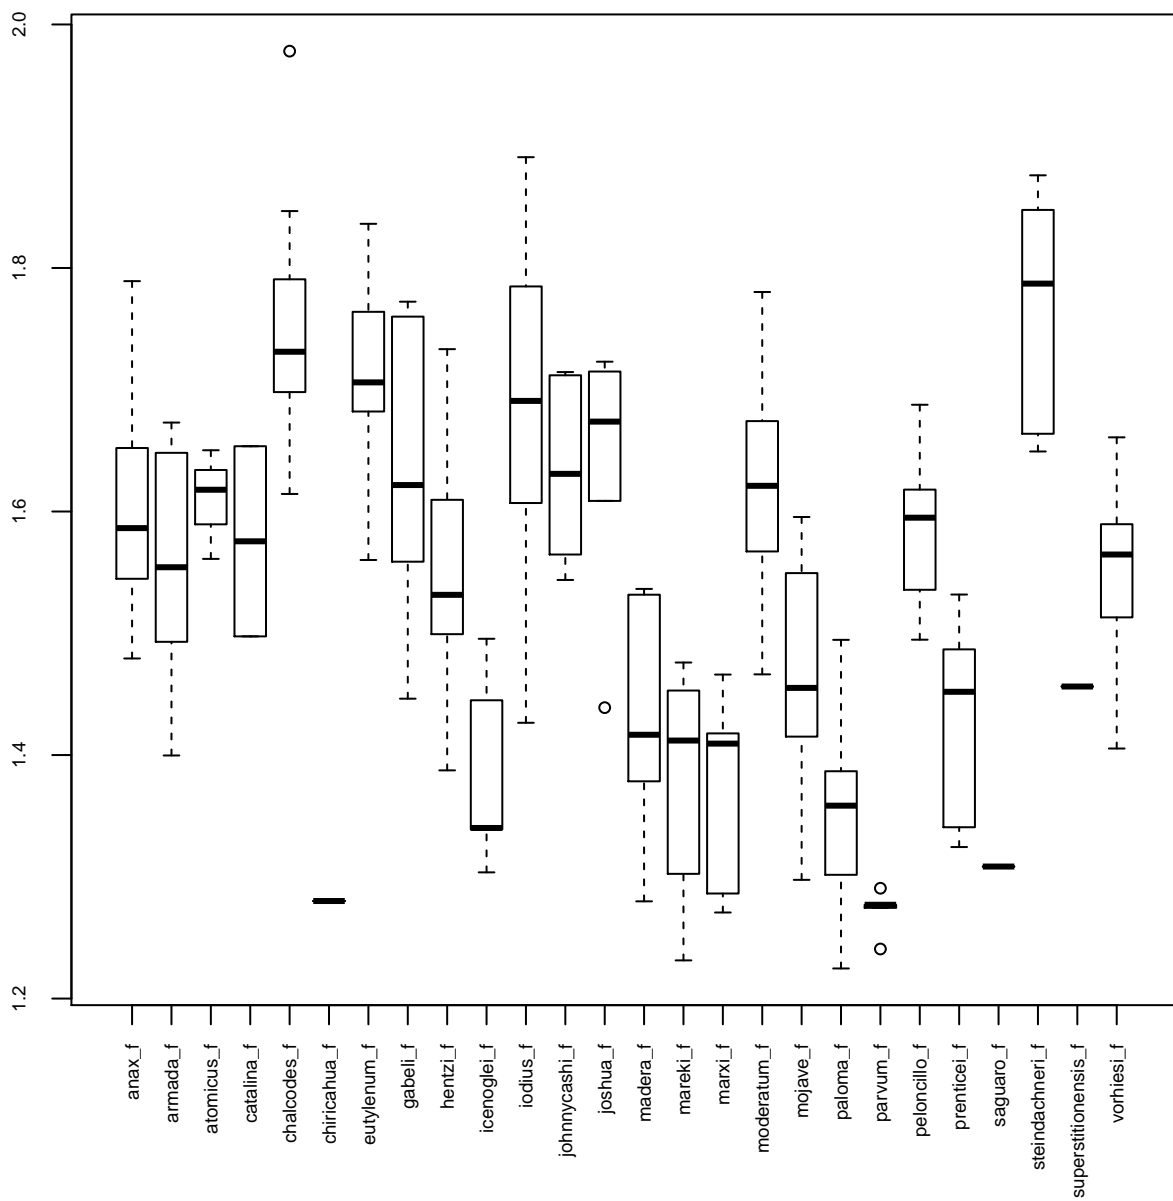

Supplement: Supplementary file 1138

## Tarsus 1/Metatarsus 3 Length ratio – females

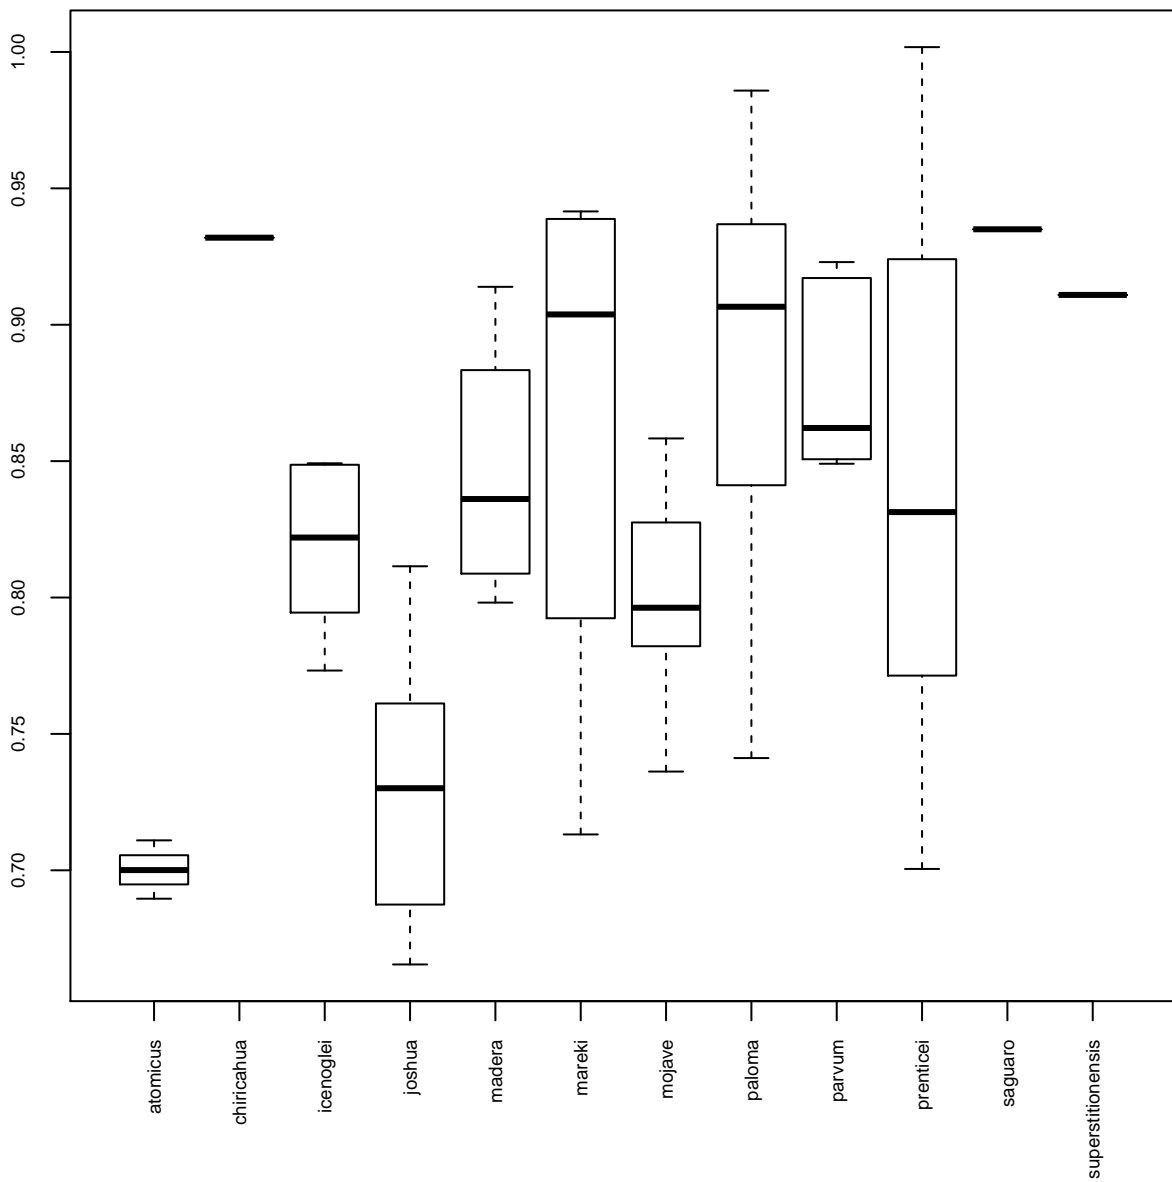

Supplement: Supplementary file 1139

## Patella 1/Tibia 3 Length ratio – males

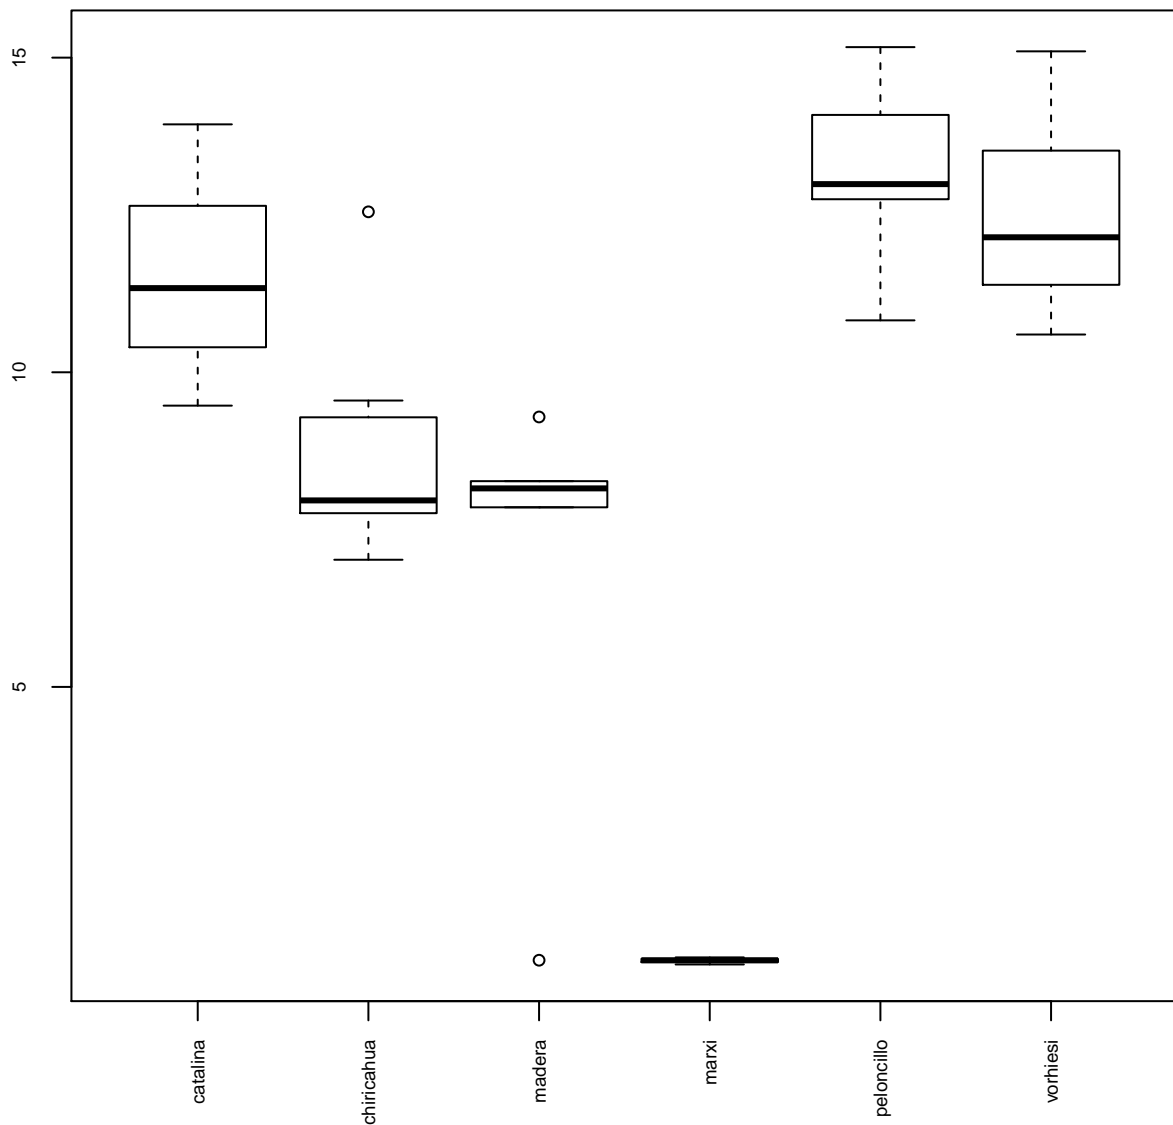

Supplement: Supplementary file 1140

# Patella 1/Patella 4 ratio – females

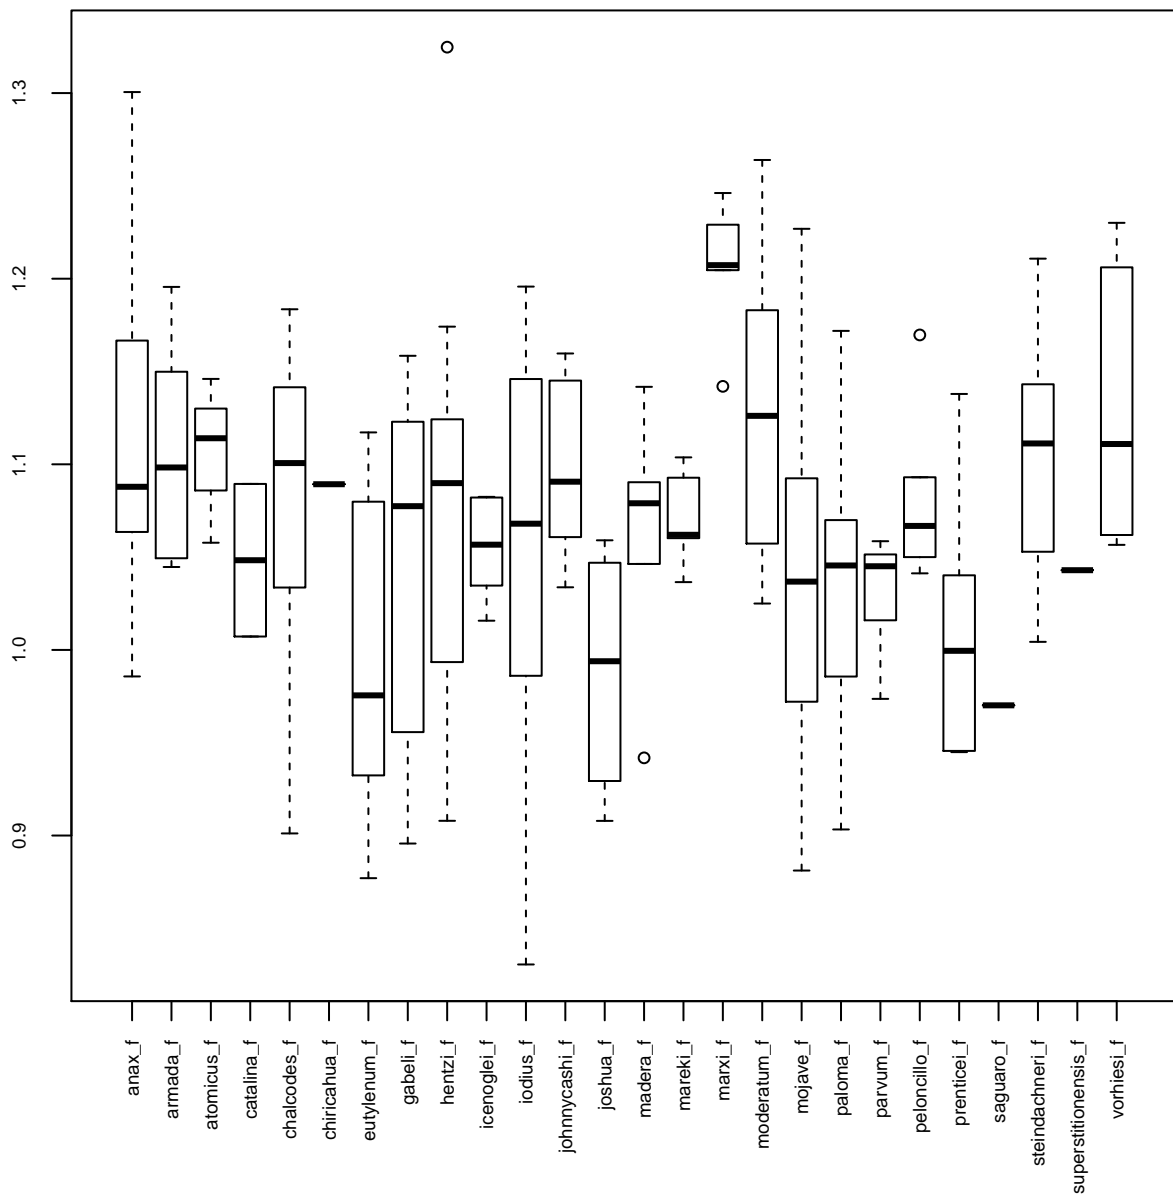

Supplement: Supplementary file 1141

## Patella 3/Patella 4 ratio – females

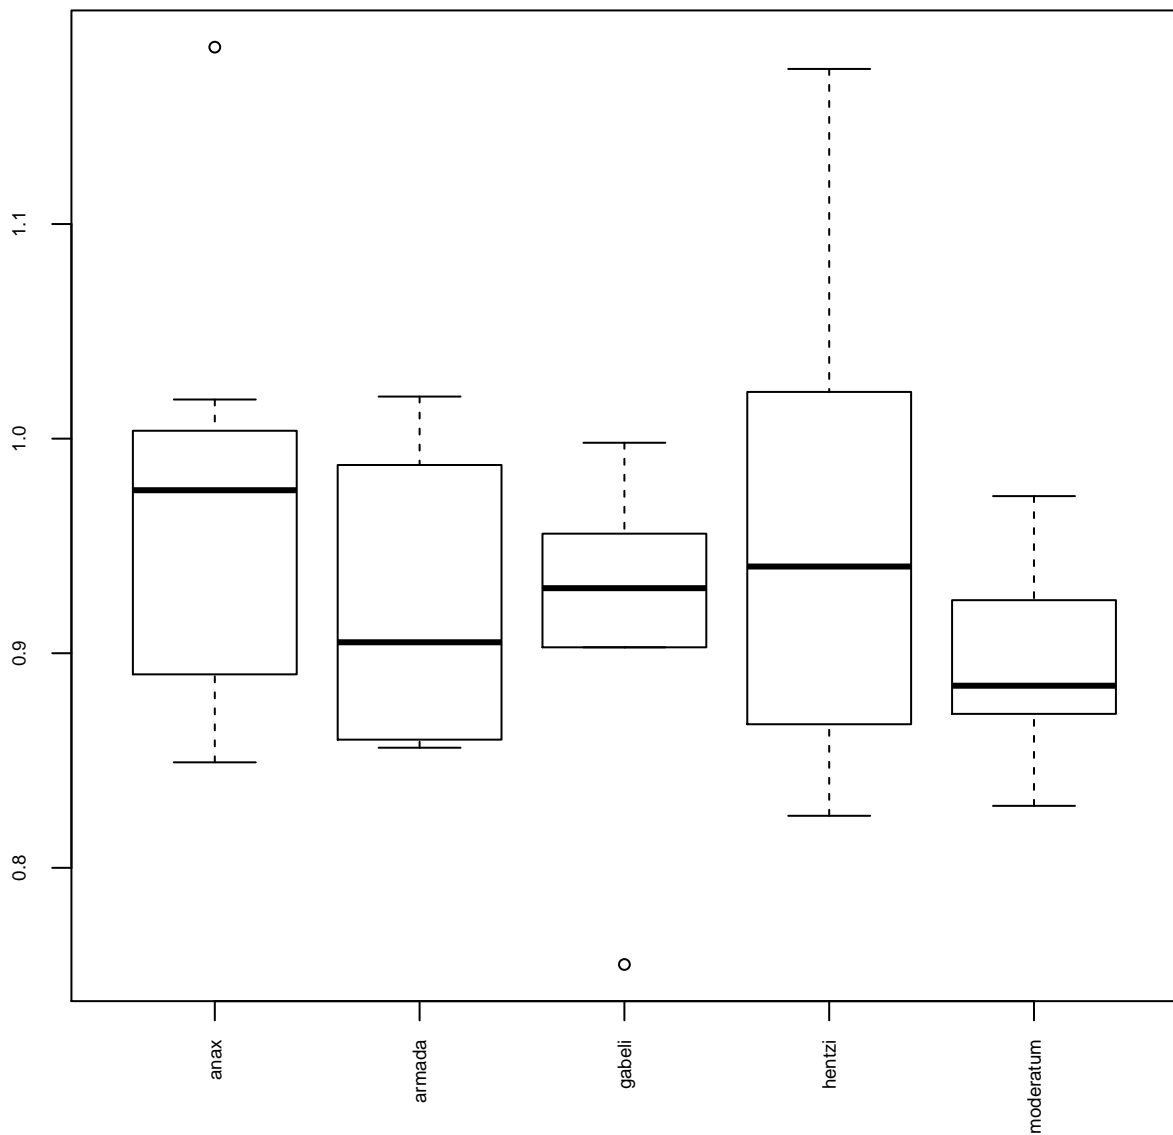

Supplement: Supplementary file 1142

## Tibia 3/Metatarsus 3 ratio – females

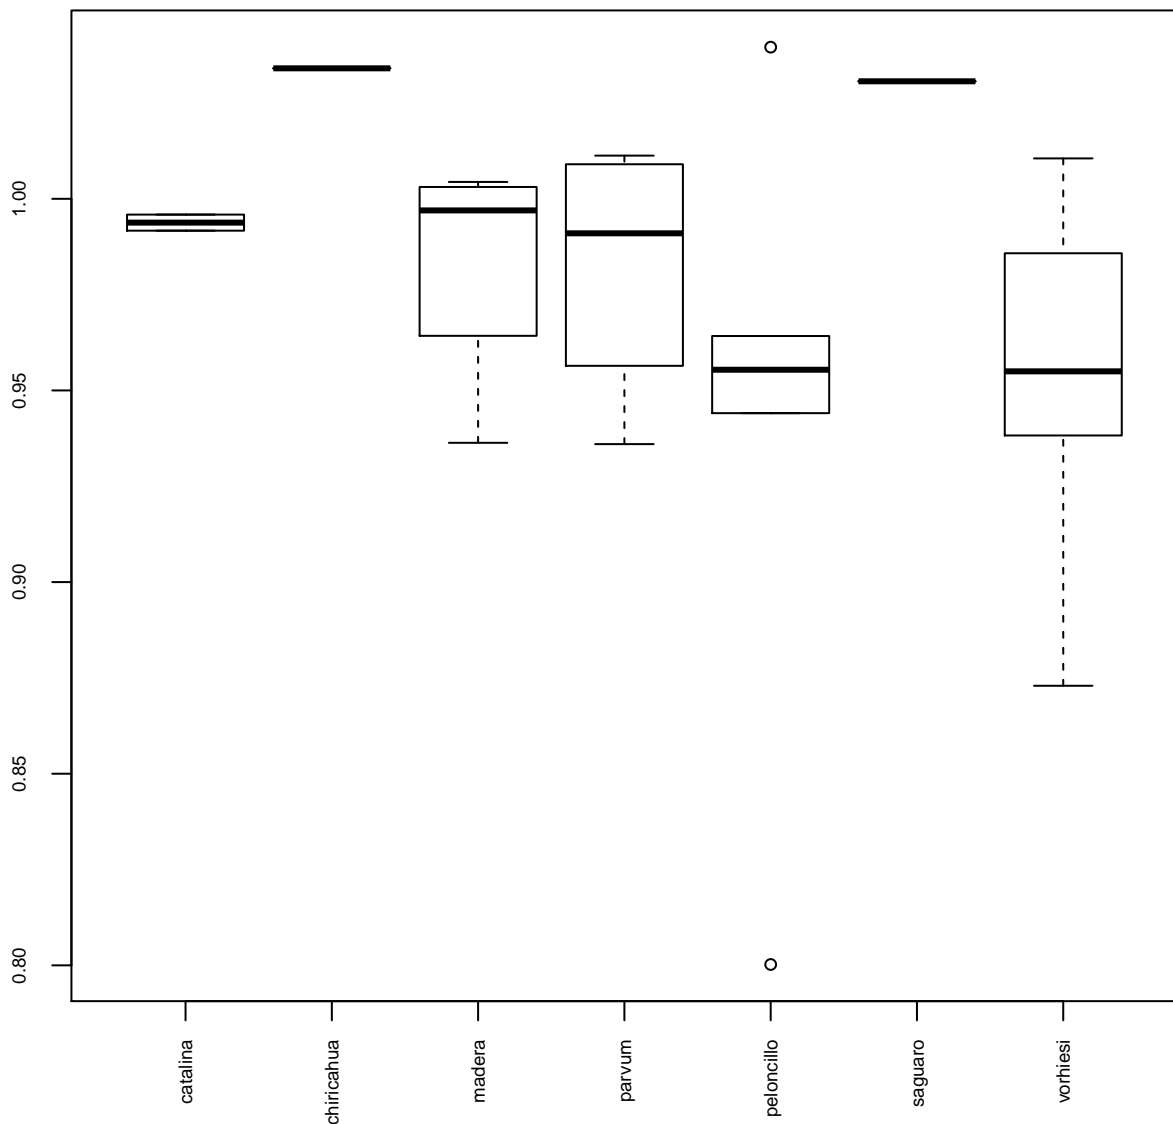

Supplement: Supplementary file 1143

## Carapace Length/Metatarsus 3 ratio – females

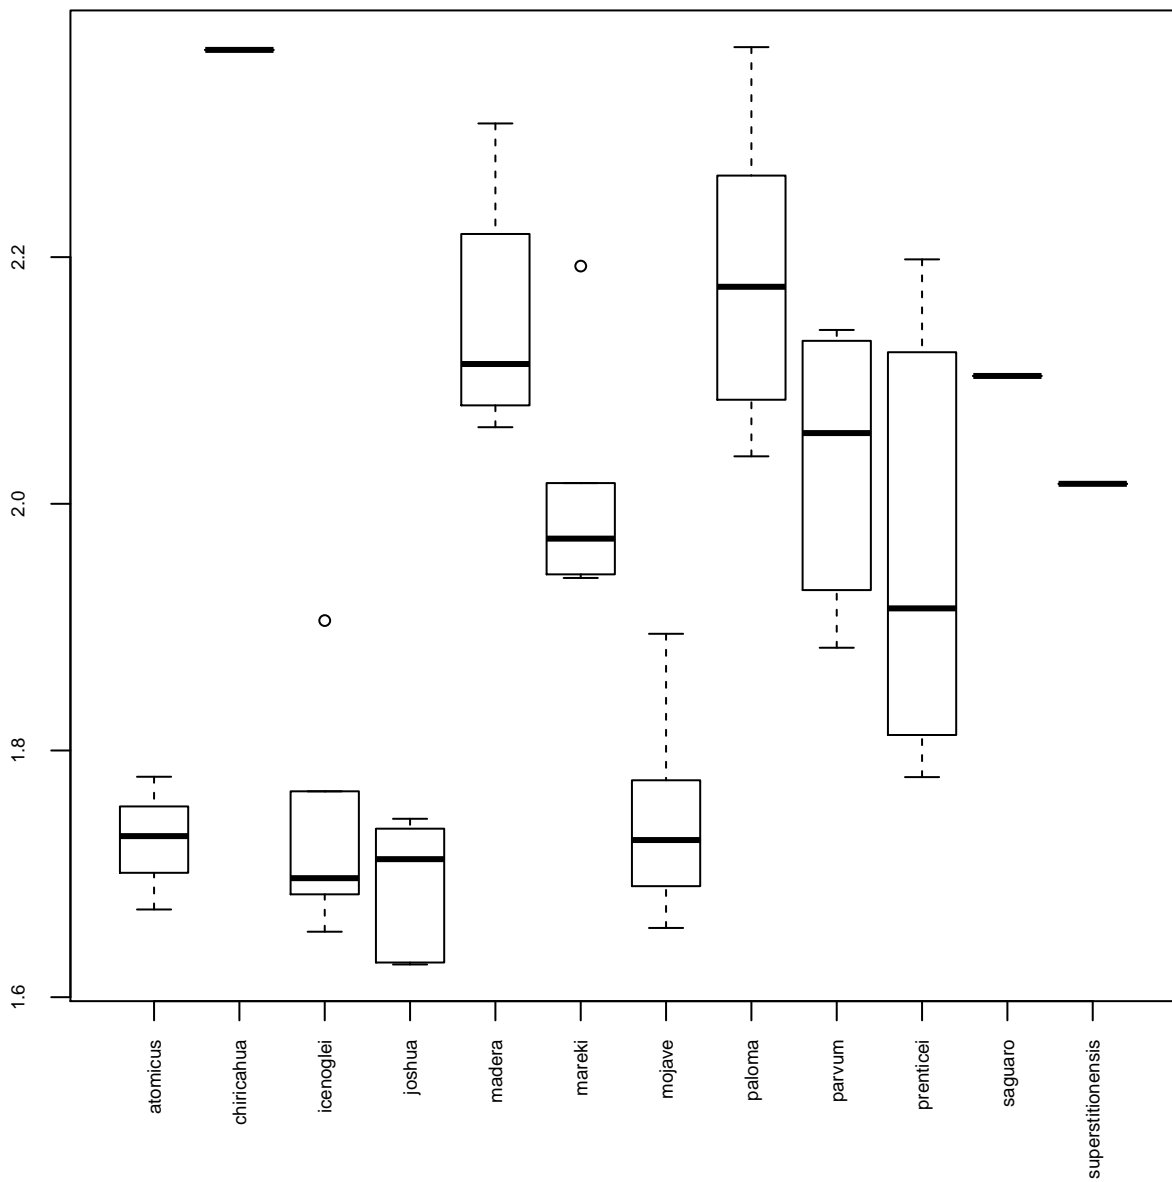

Supplement: Supplementary file 1144

## Tibia 1/Metatarsus 1 ratio – males

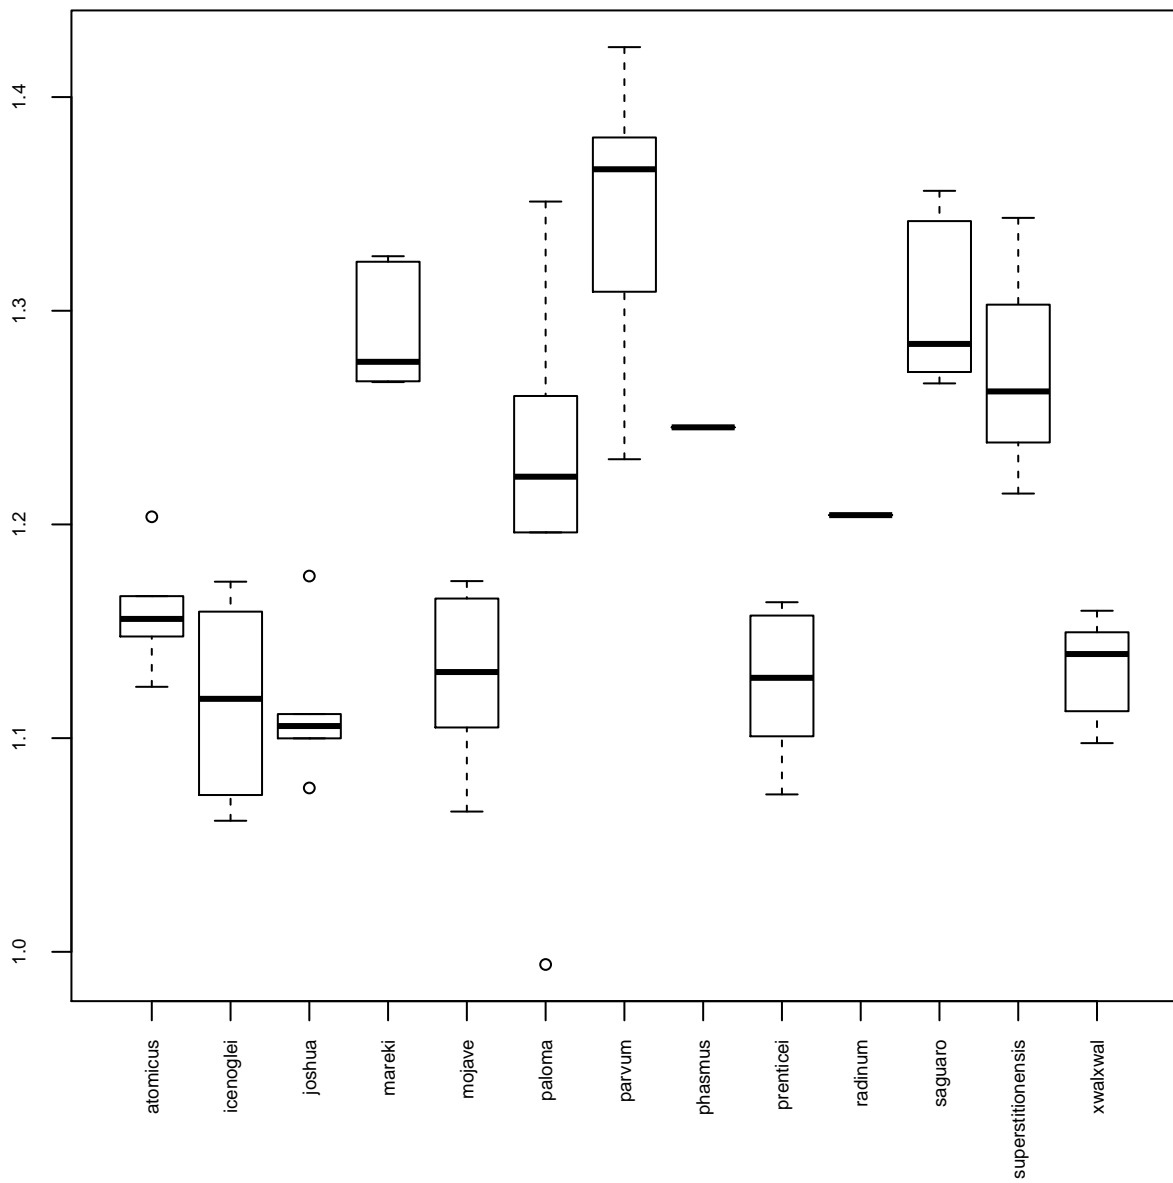

Supplement: Supplementary file 1145

## Tarsus 3/Femur 4 Length ratio – females

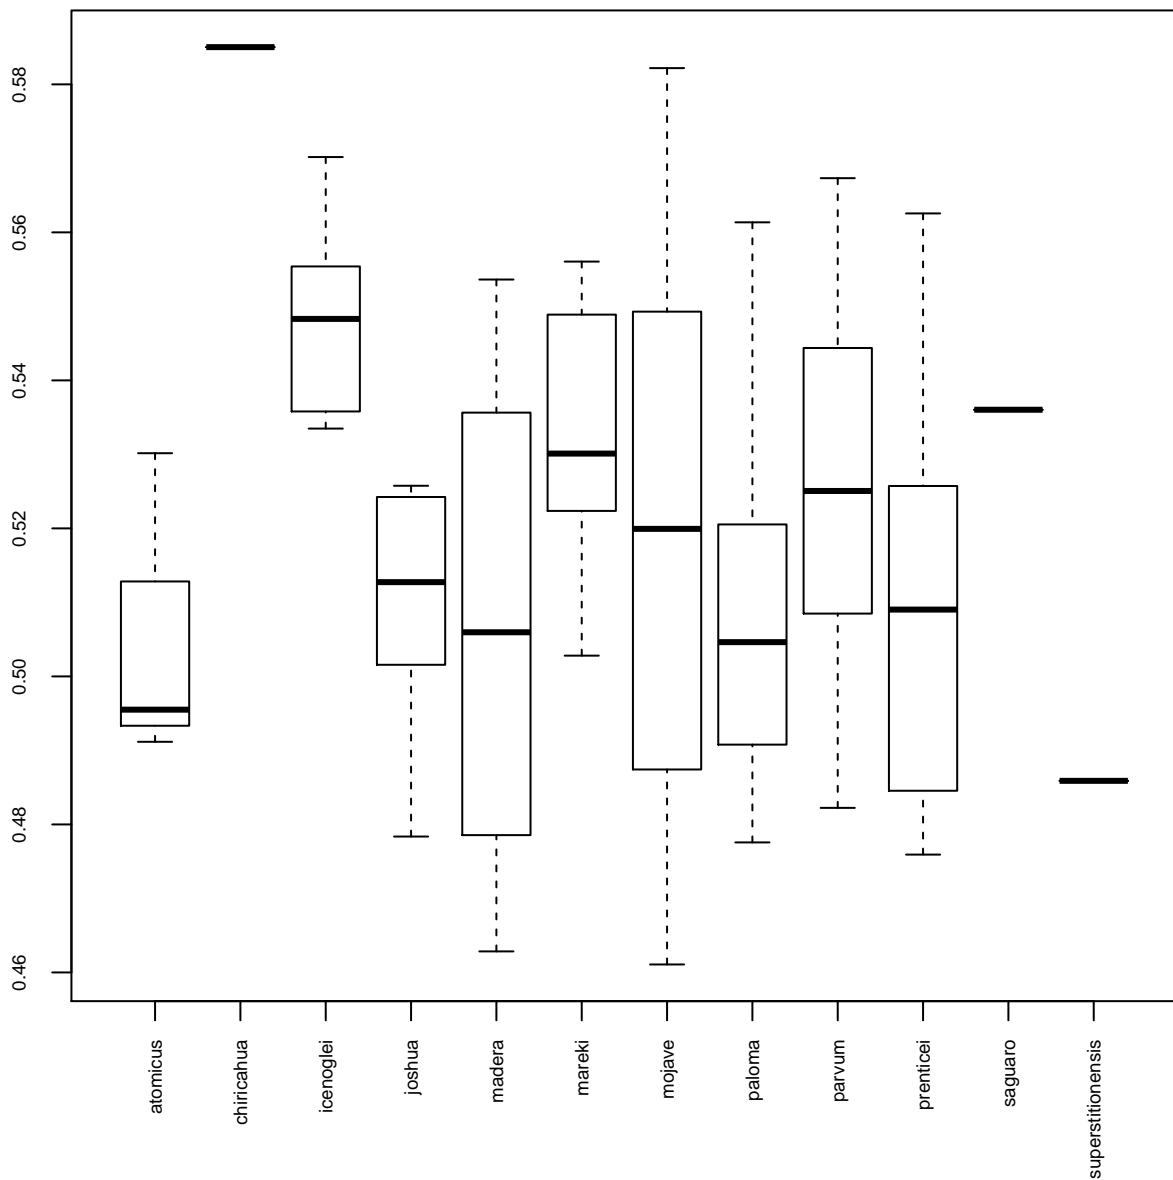

Supplement: Supplementary file 1146

# Labial Length/Width ratio – males

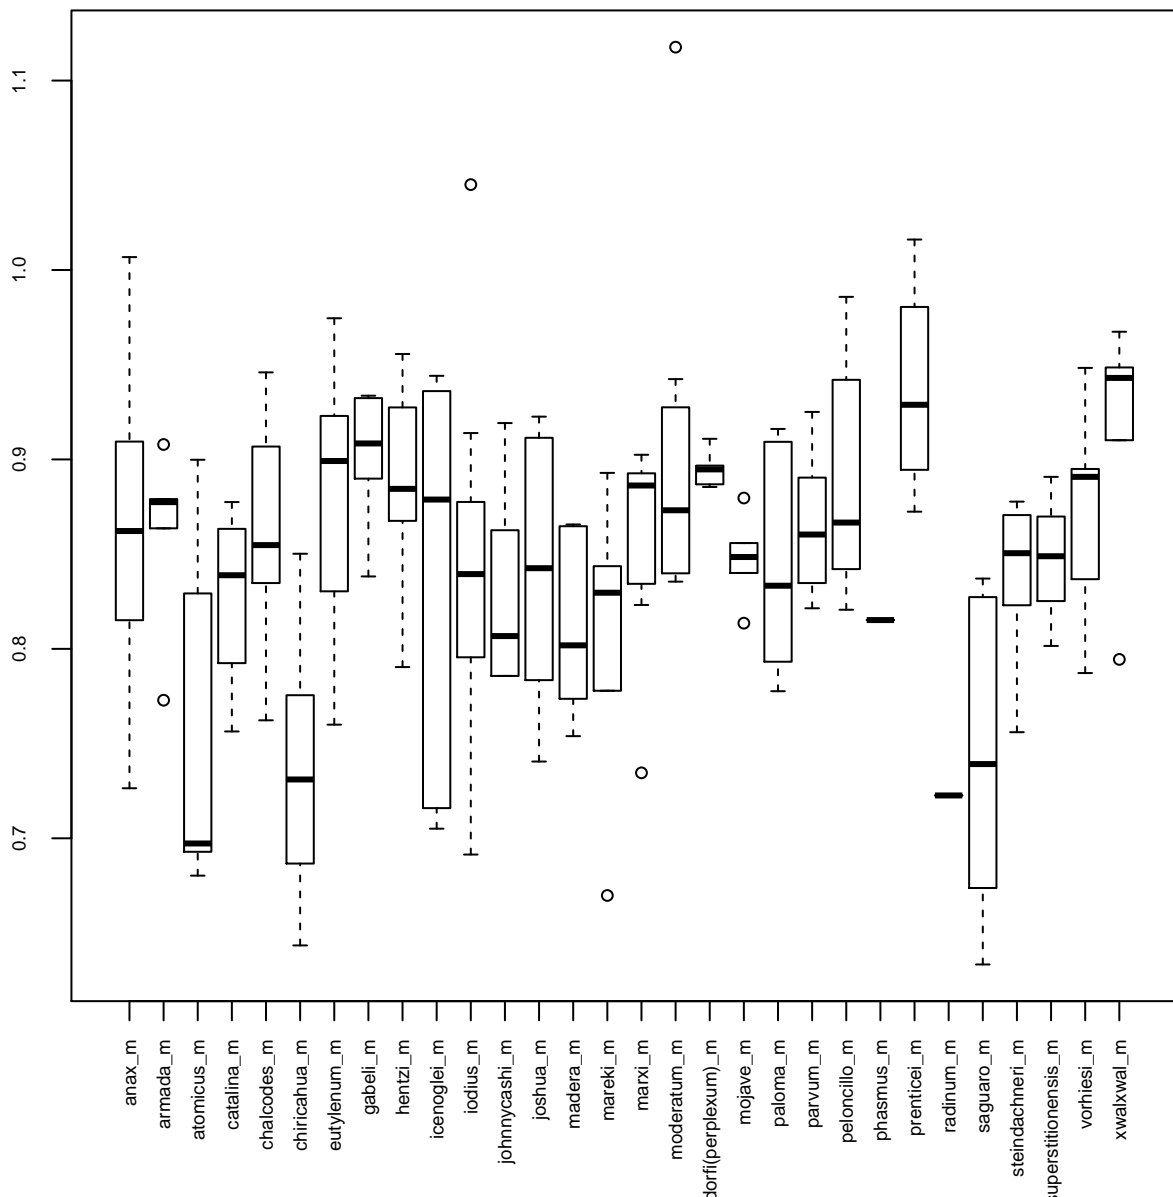

Supplement: Supplementary file 1147

## Patella 4/Tibia 4 ratio – males

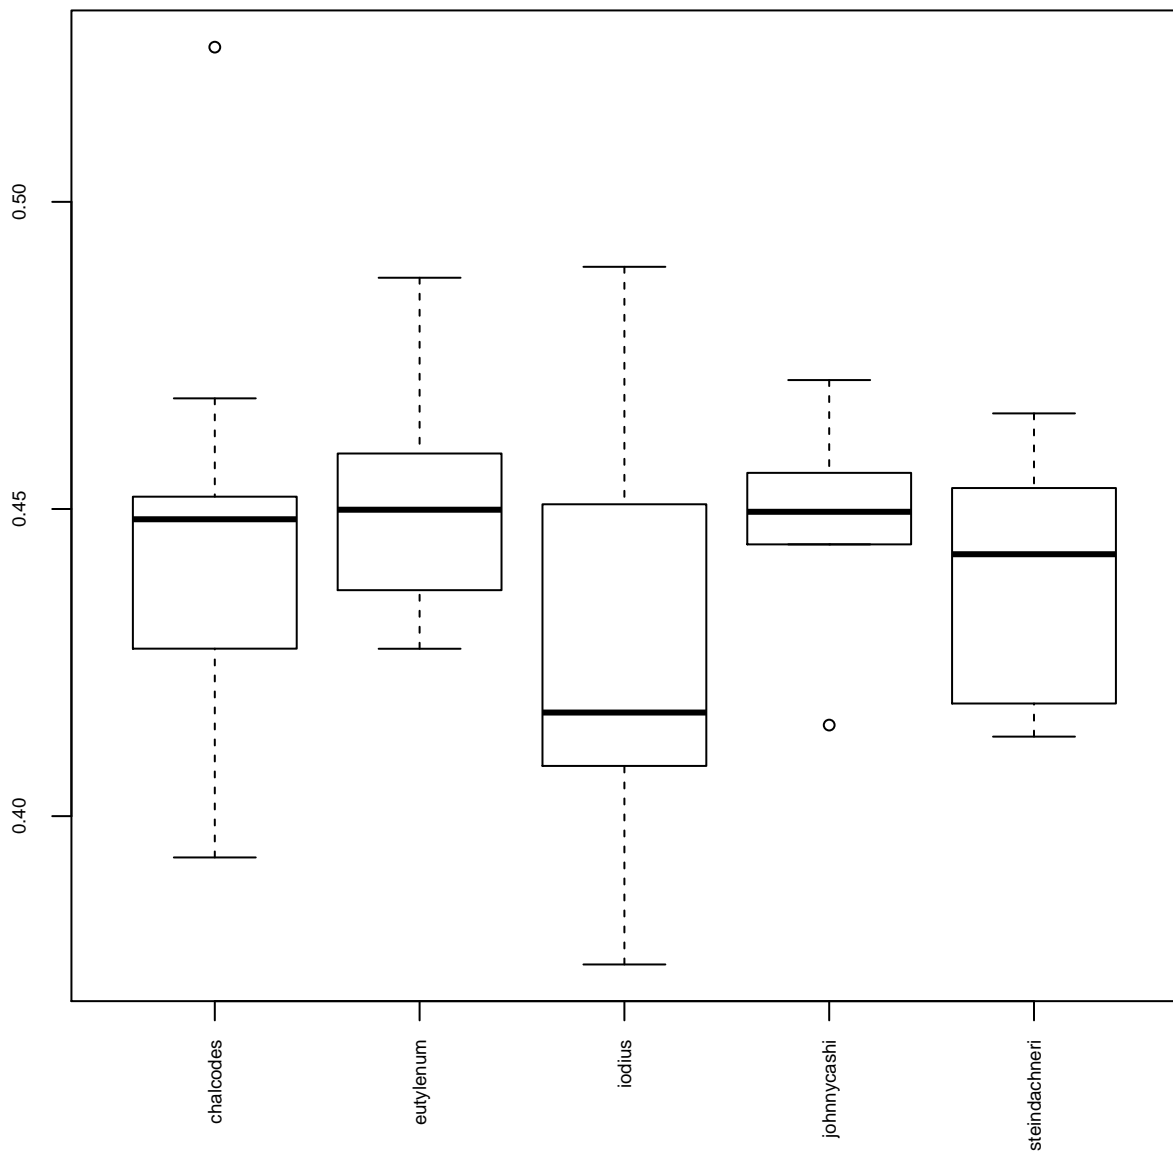

Supplement: Supplementary file 1148

## Tibia 3/Tarsus 4 Length ratio – males

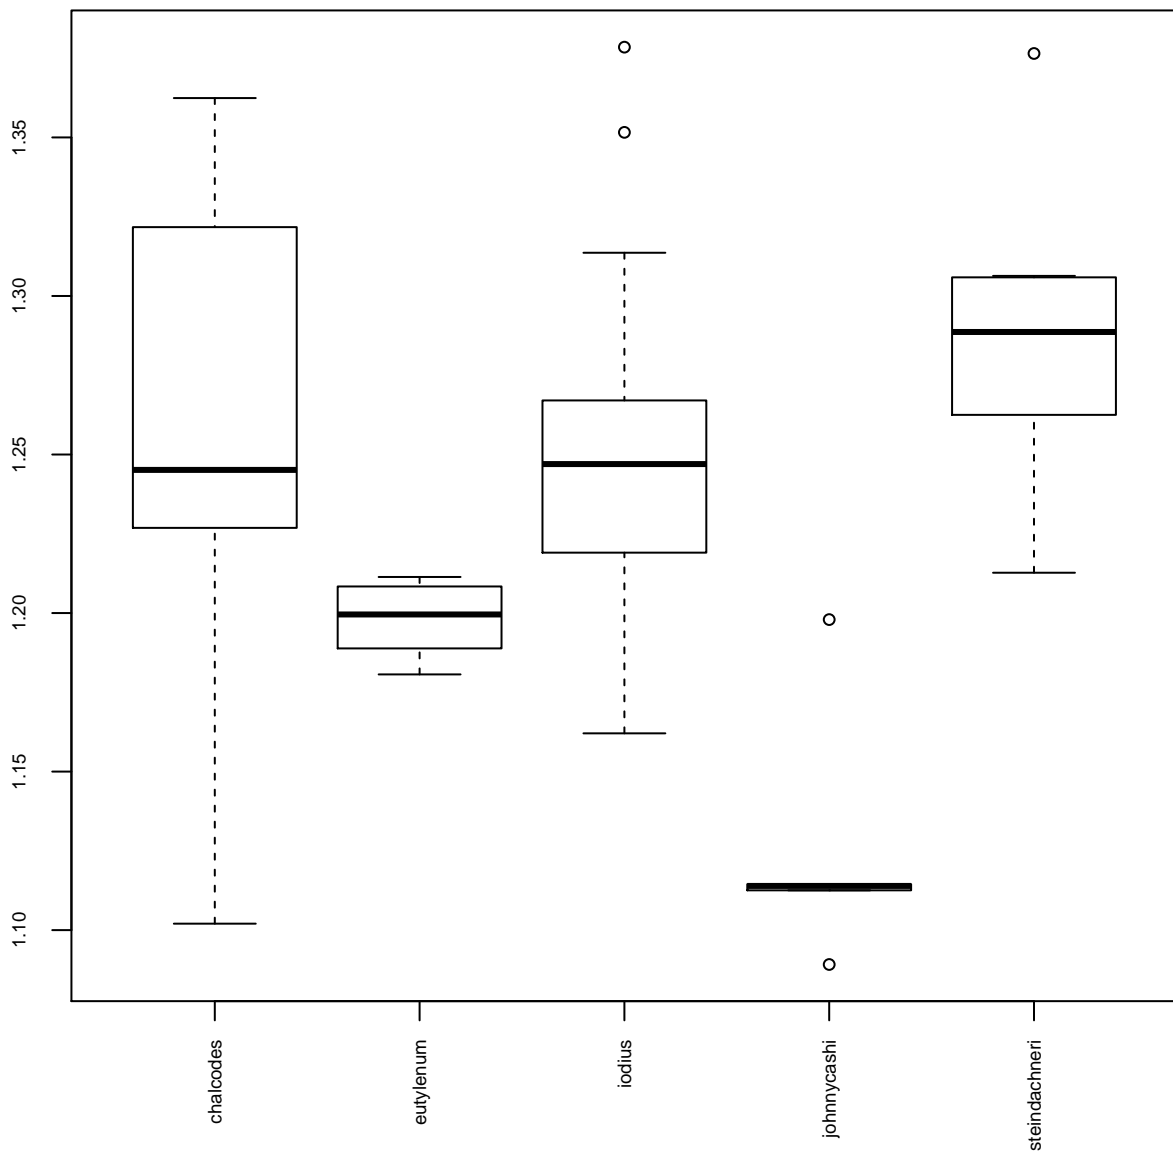

Supplement: Supplementary file 1149

## Leg 1/Leg 4 Length ratio – males

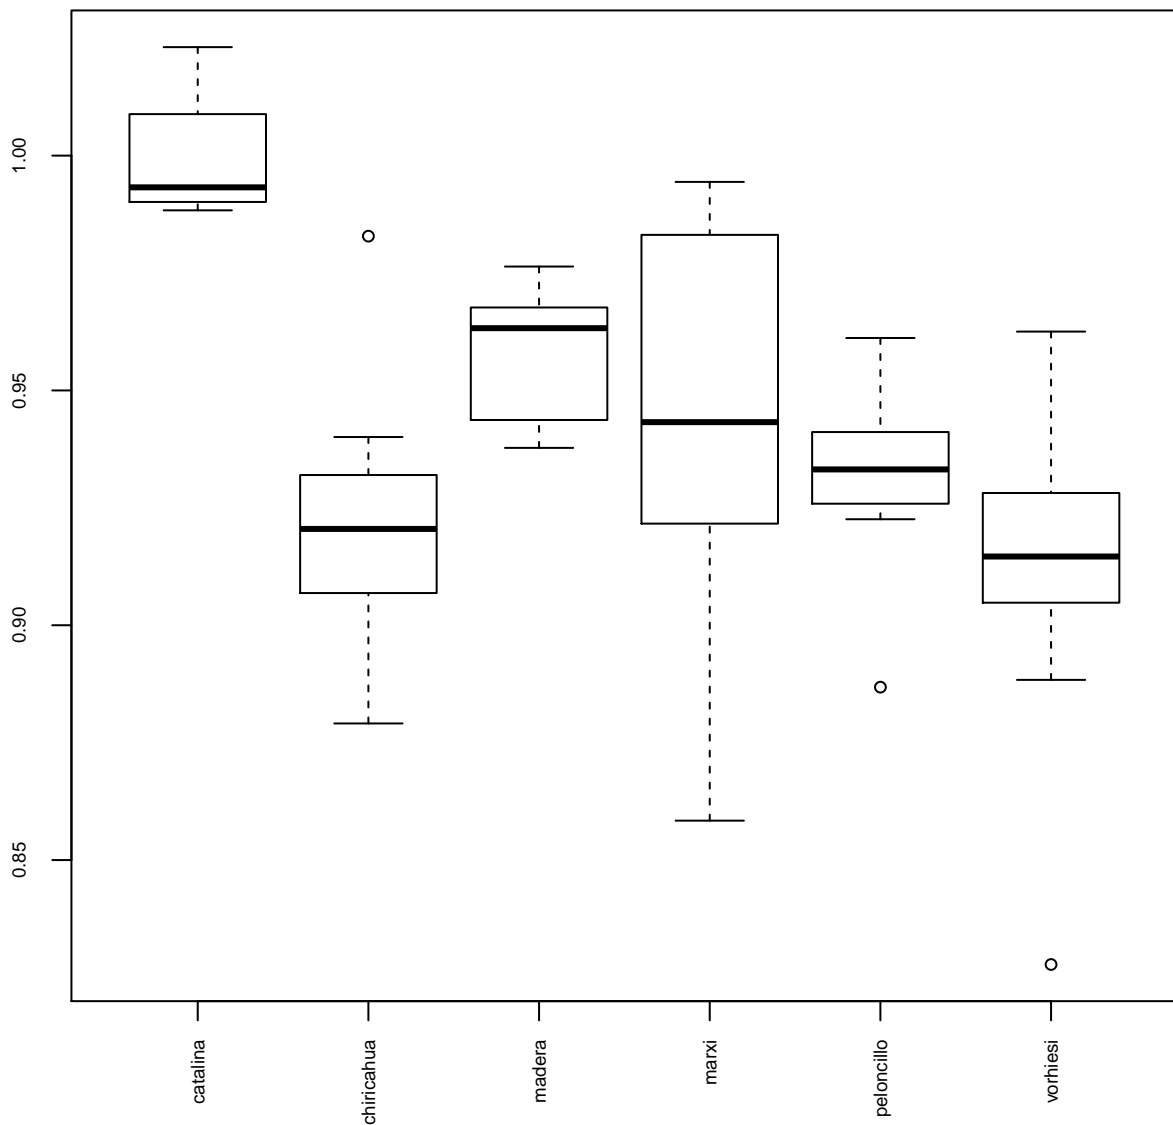

Supplement: Supplementary file 1150

## Metatarsus 1/Femur 4 Length ratio – females

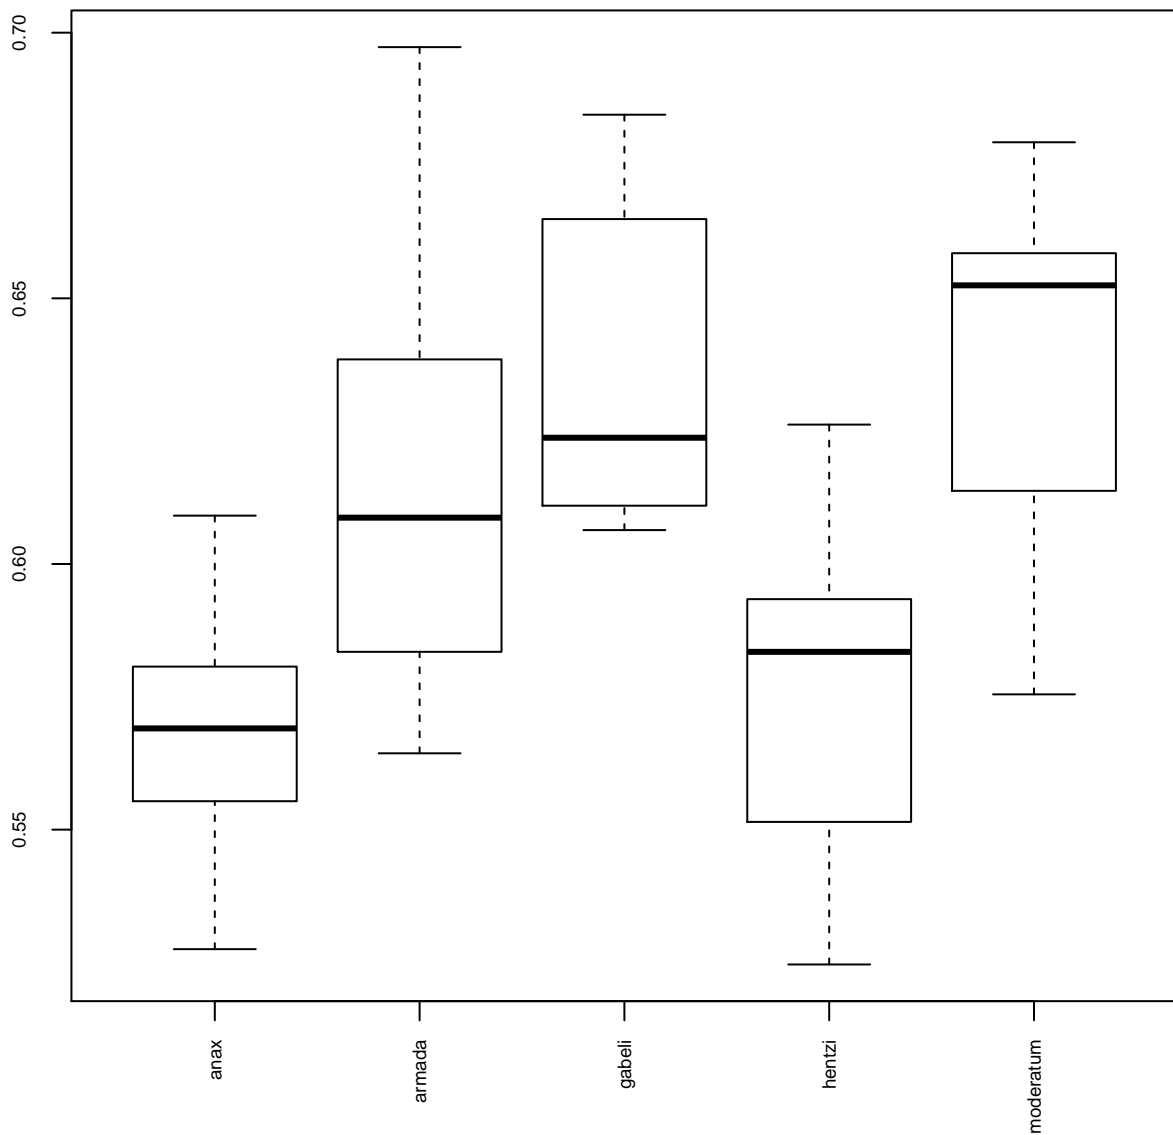

Supplement: Supplementary file 1151

## Patella 1/Metatarsus 3 Length ratio – males

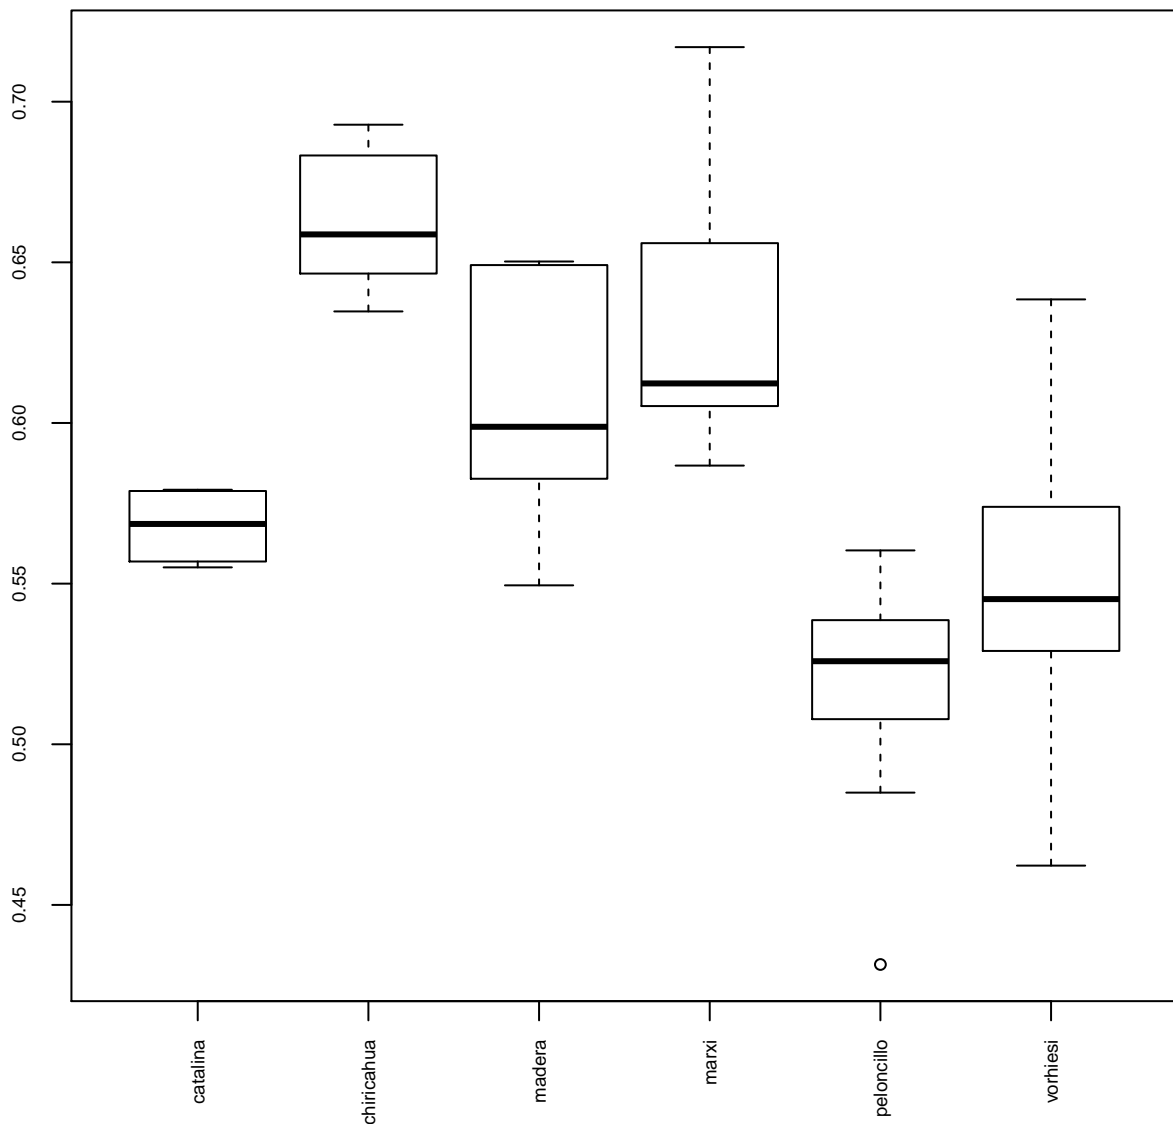

Supplement: Supplementary file 1152

# Tibia 3/Metatarsus 3 ratio – males

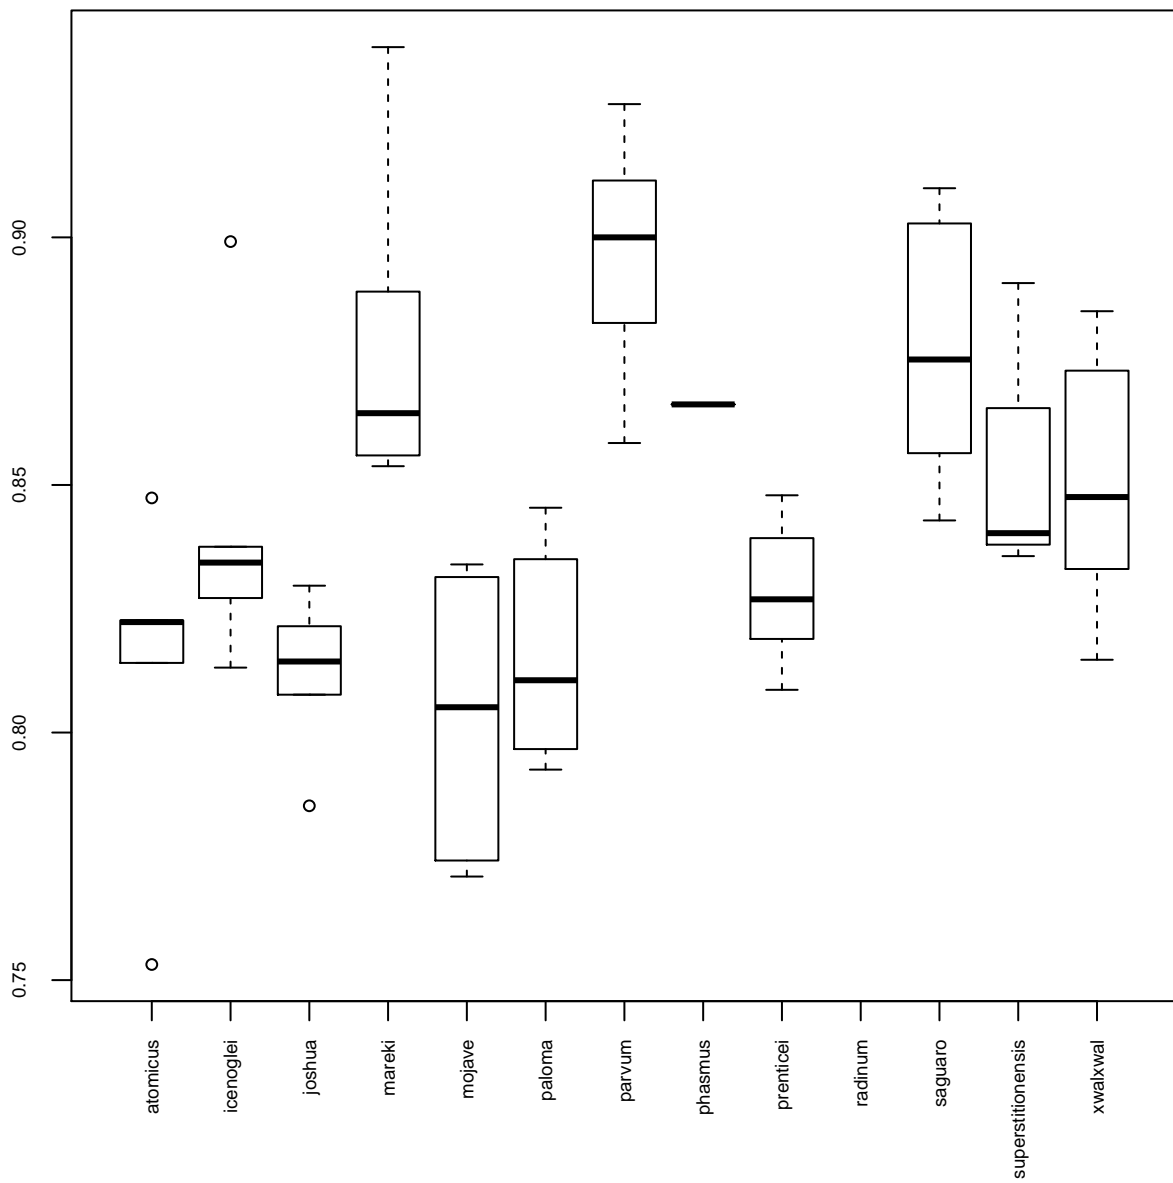

Supplement: Supplementary file 1153

## Tibia 1/Metatarsus 1 ratio – females

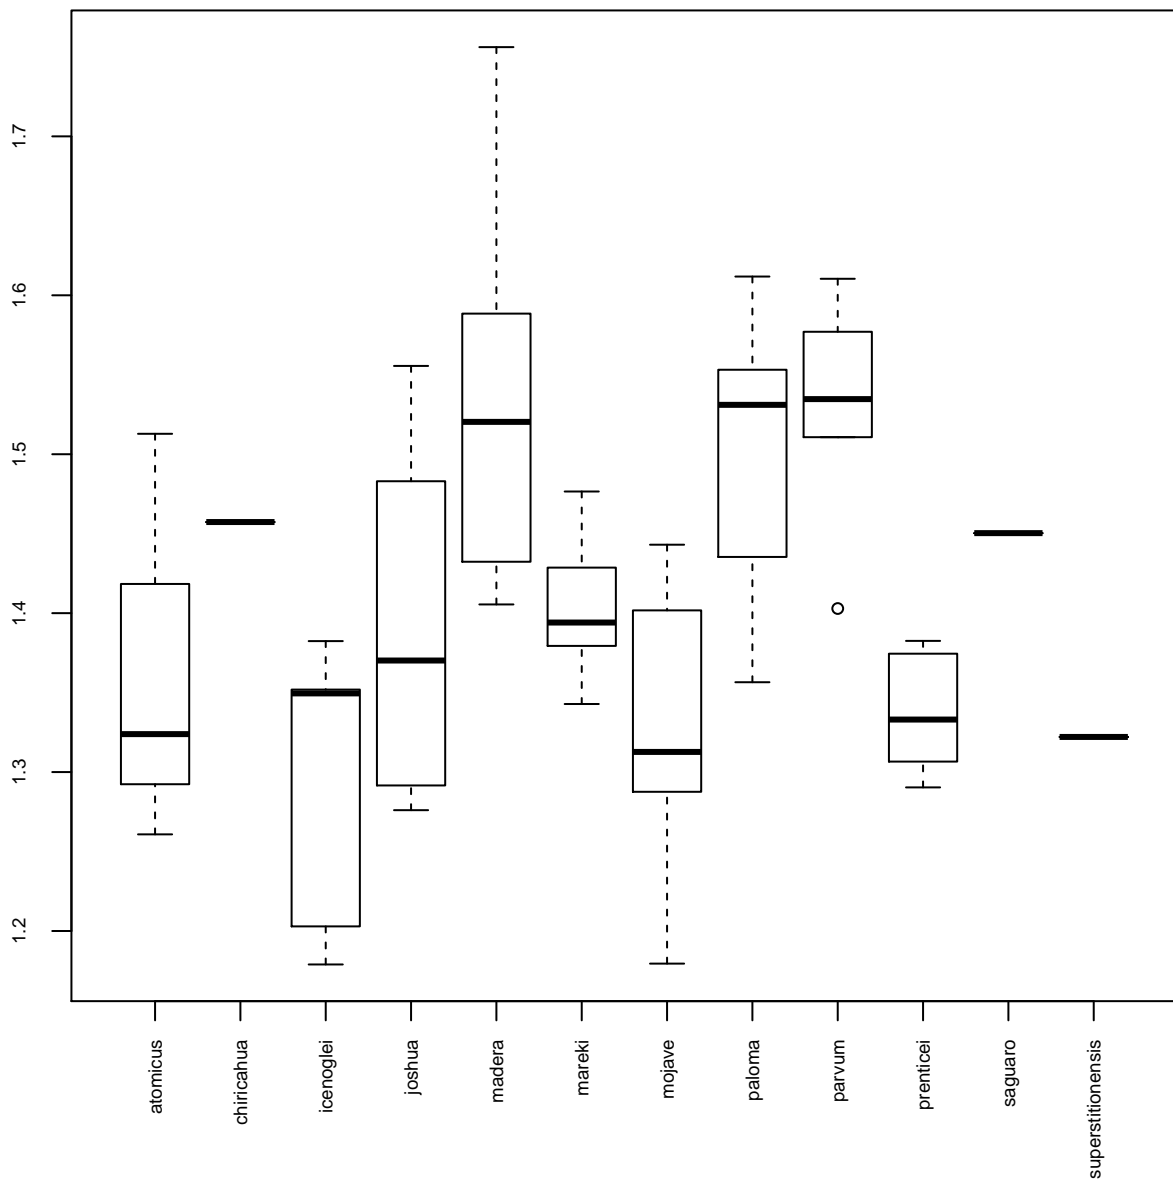

Supplement: Supplementary file 1154

## Tarsus 1/Tarsus 4 ratio – females

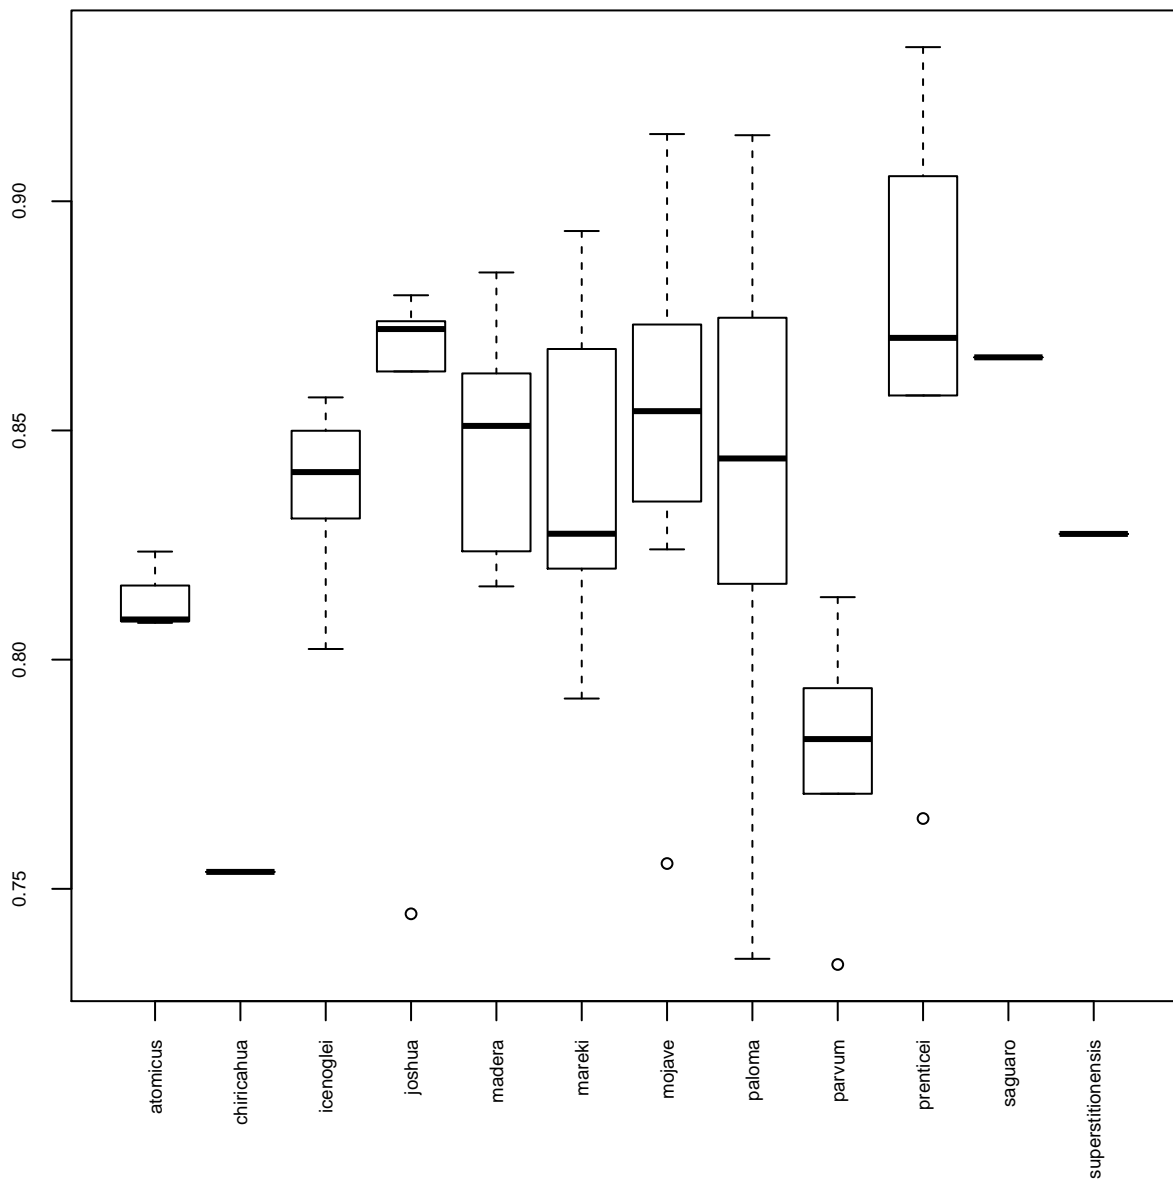

Supplement: Supplementary file 1155

## Patella 1/Metatarsus 1 ratio – males

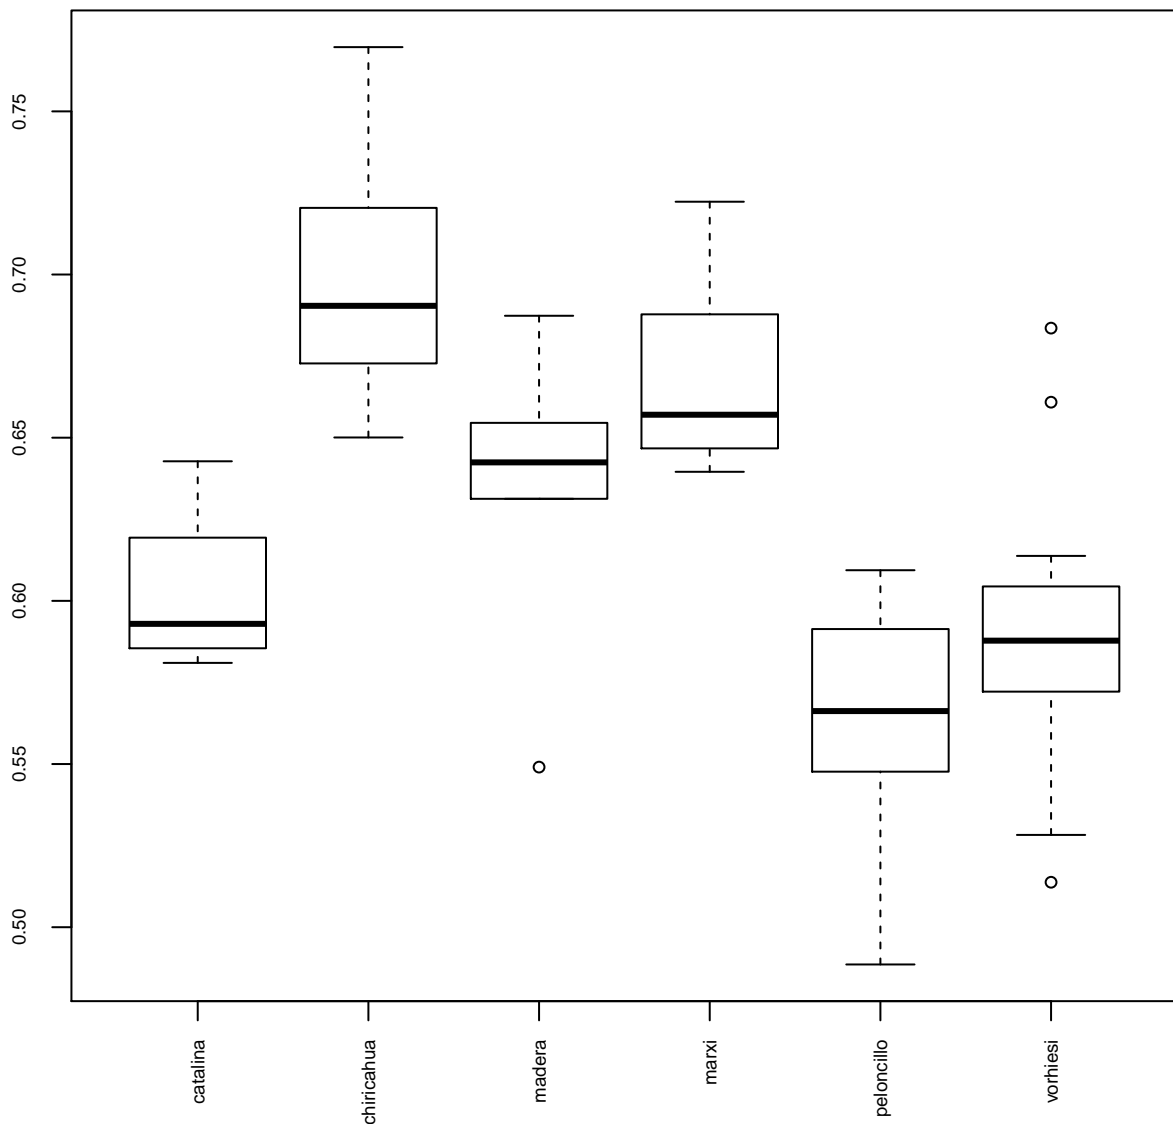

Supplement: Supplementary file 1156

## Patella 1/Tarsus 1 ratio – males

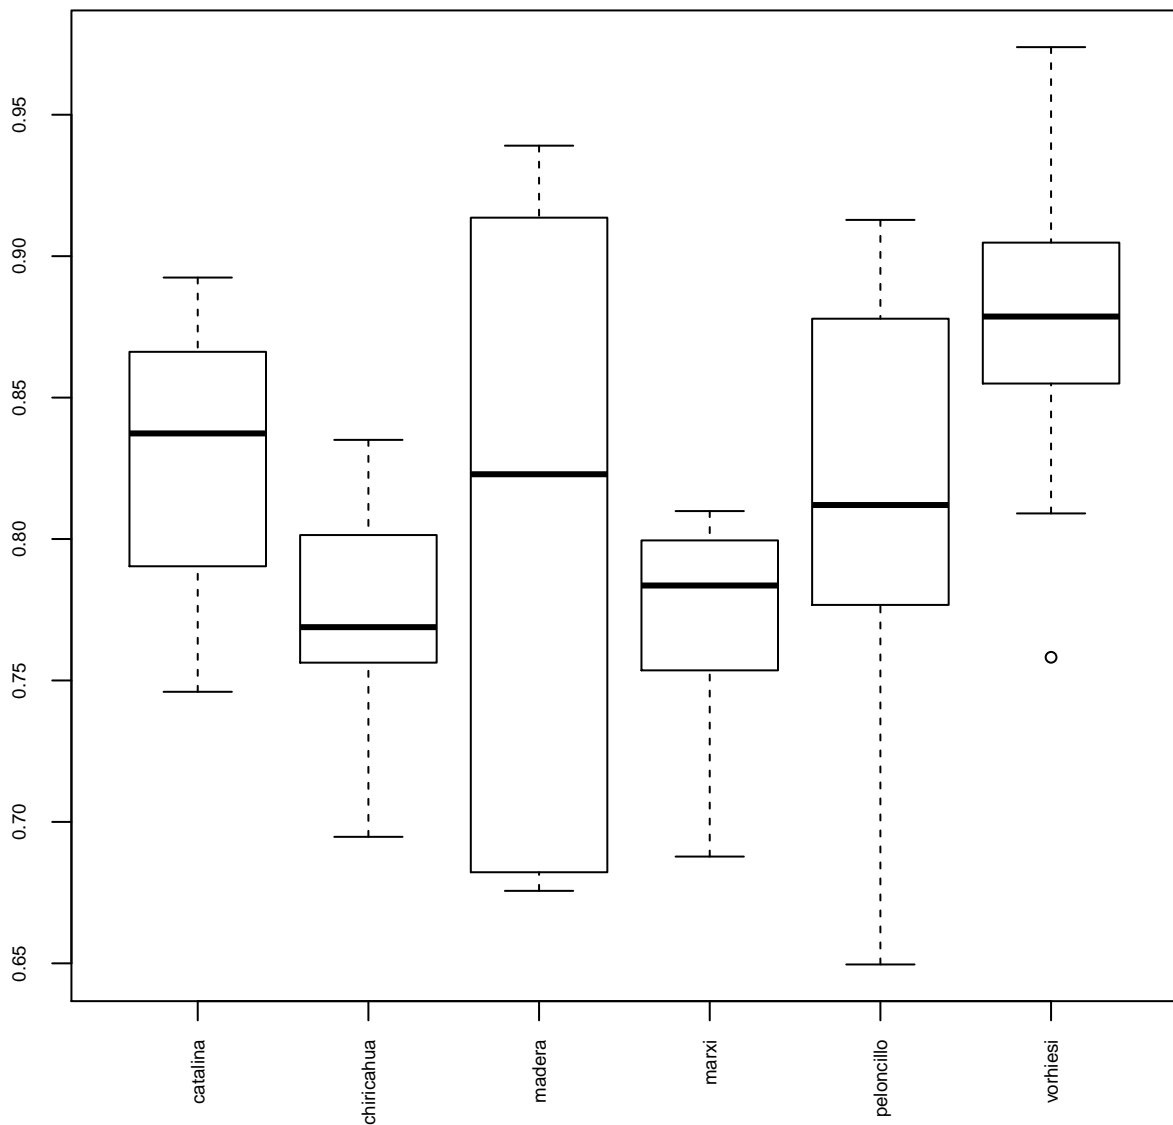

Supplement: Supplementary file 1157

# Patella 4/Metatarsus 4 ratio – males

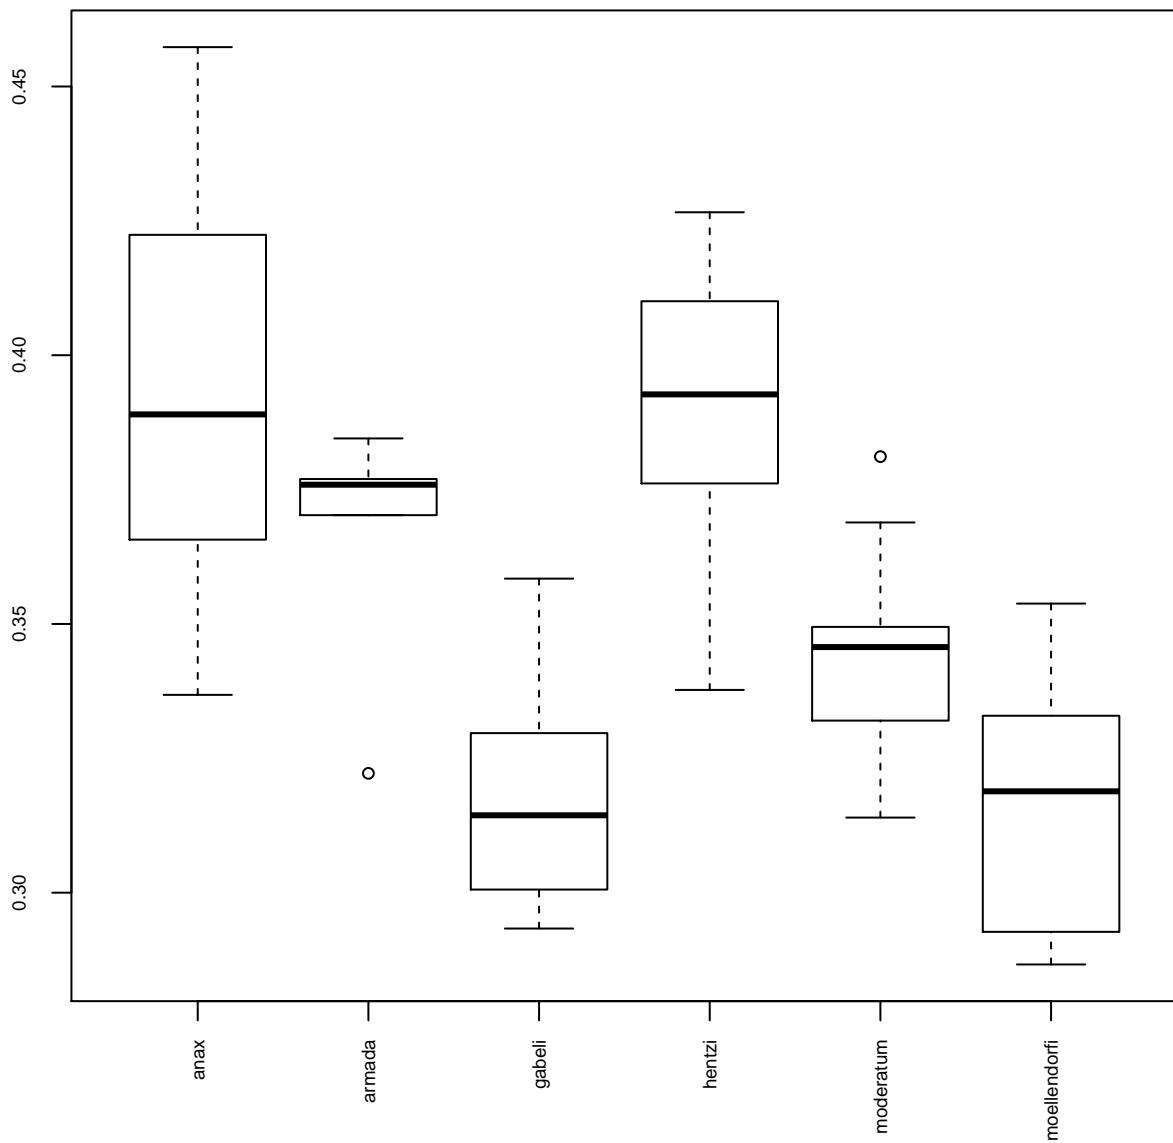

Supplement: Supplementary file 1158

# Carapace Length/Metatarsus 3 ratio – males

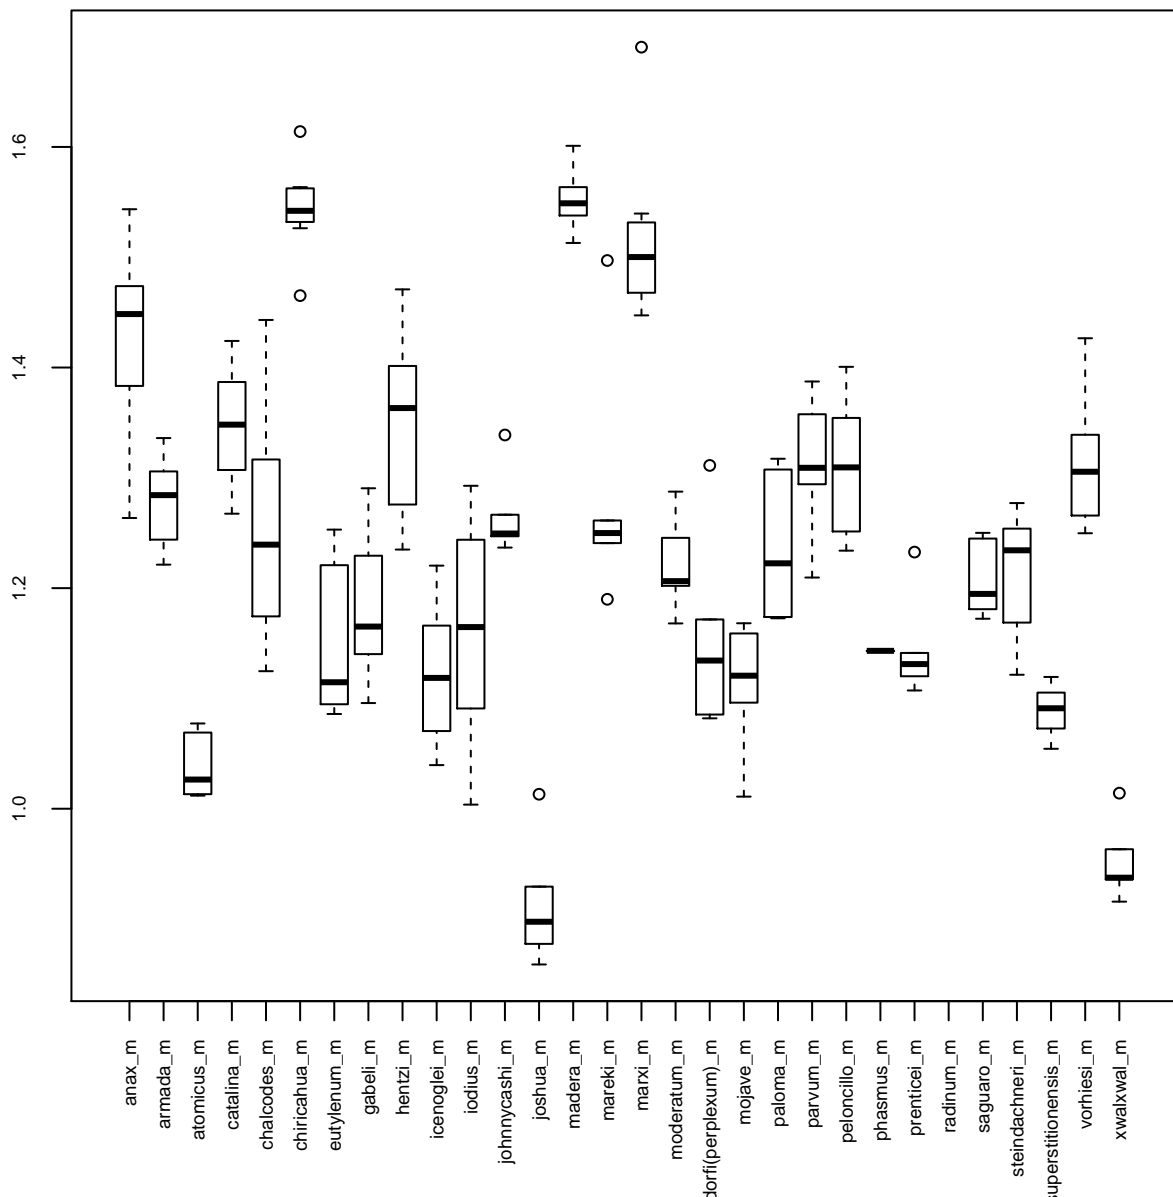

Supplement: Supplementary file 1159

## Tibia 1/Metatarsus 4 Length ratio – males

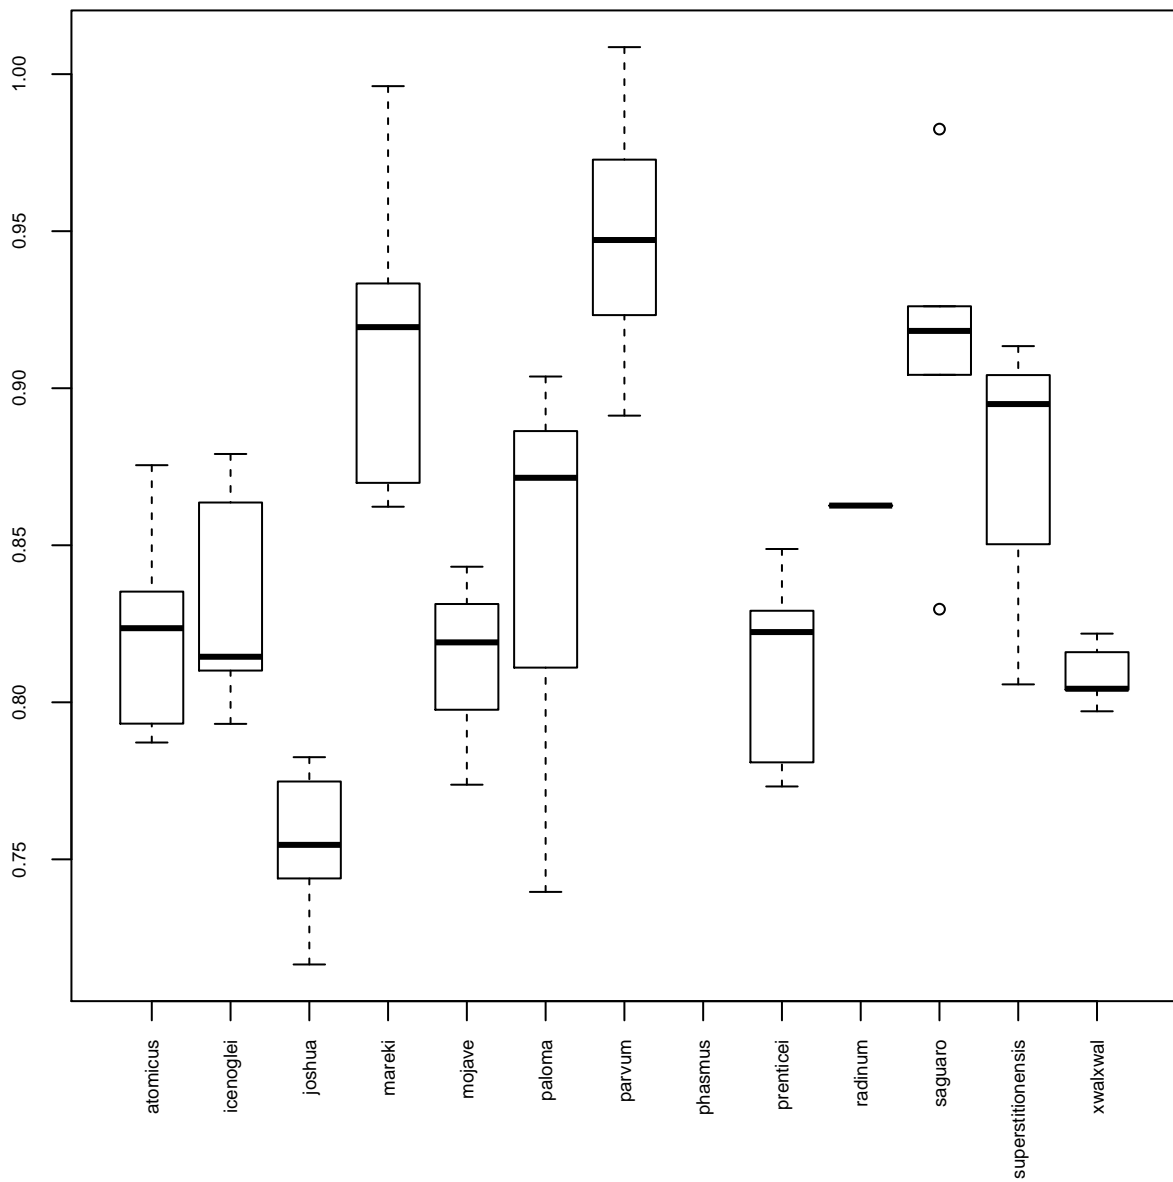

Supplement: Supplementary file 1160

# Femur 3/Metatarsus 4 Length ratio – females

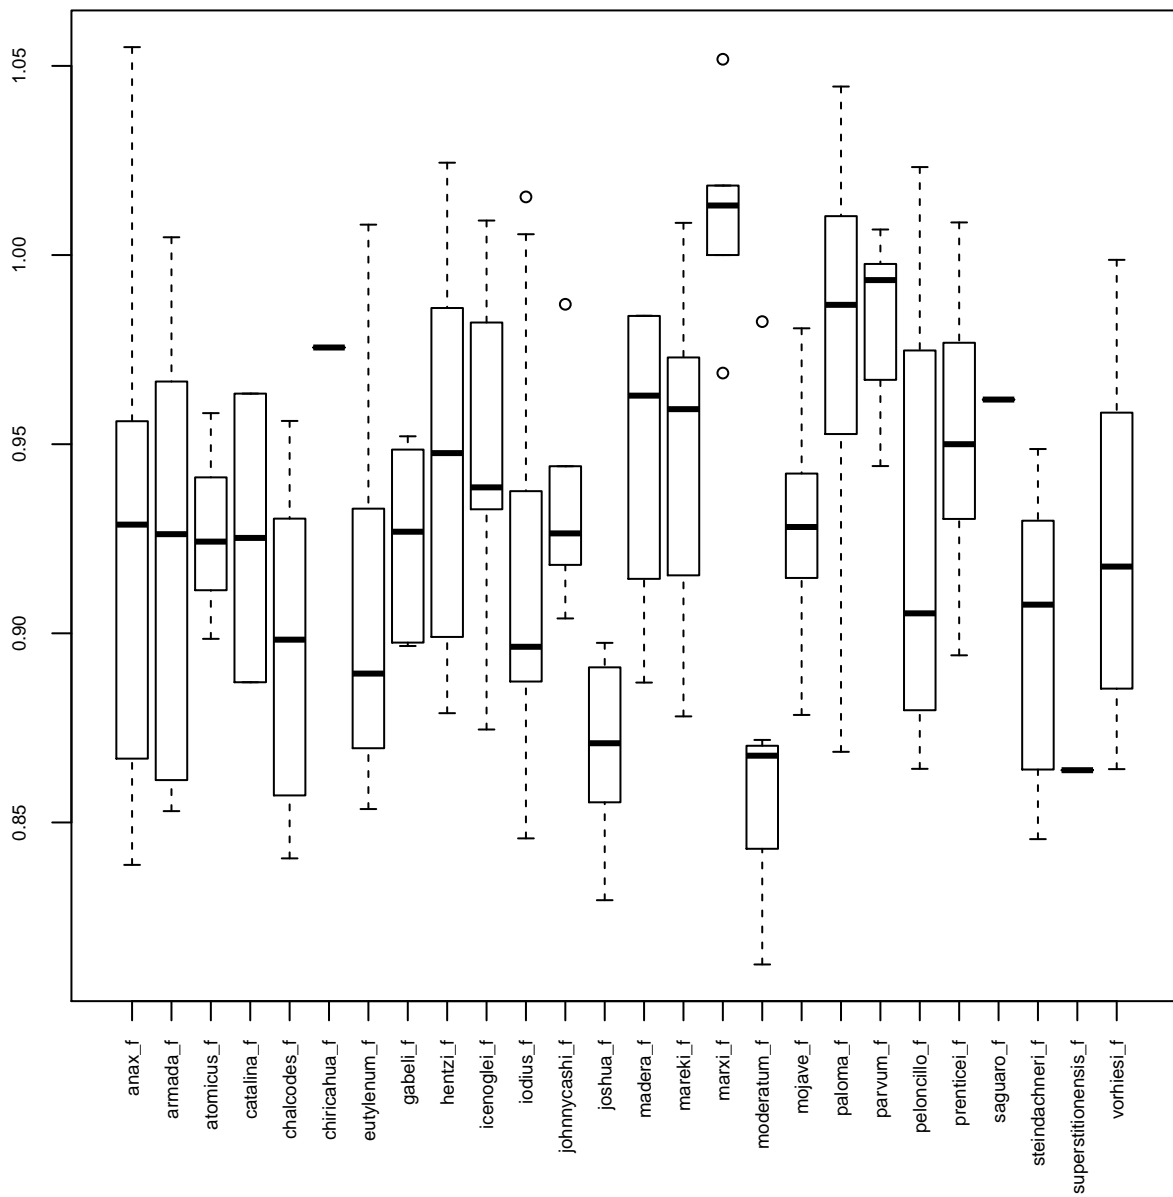

Supplement: Supplementary file 1161

## Femur 4/Tarsus 4 ratio – females

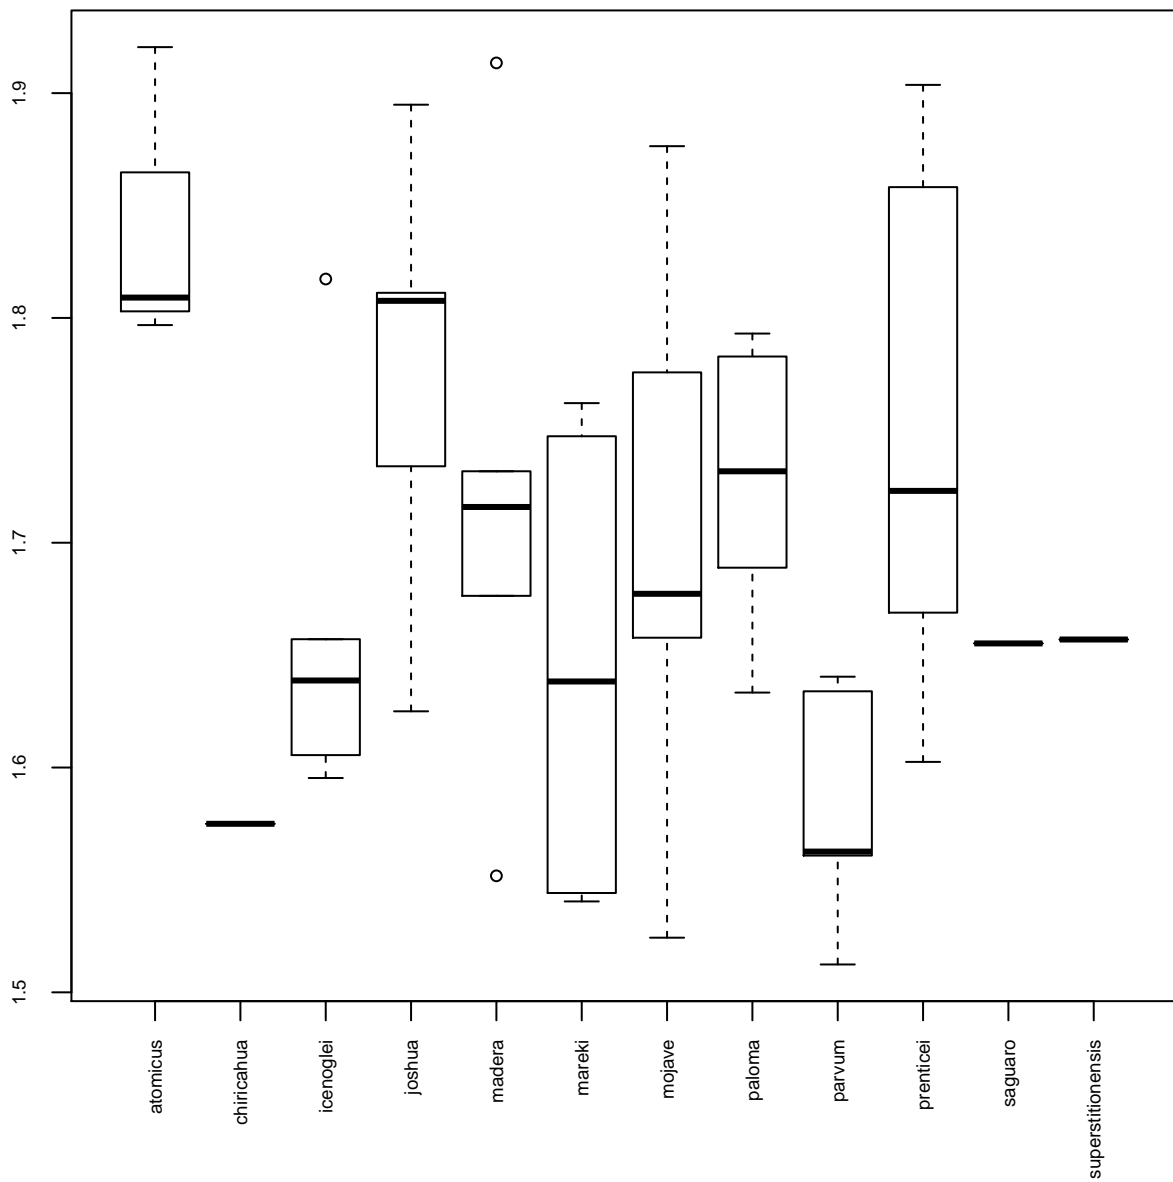

Supplement: Supplementary file 1162

## Leg 3/Leg 4 Length ratio – females

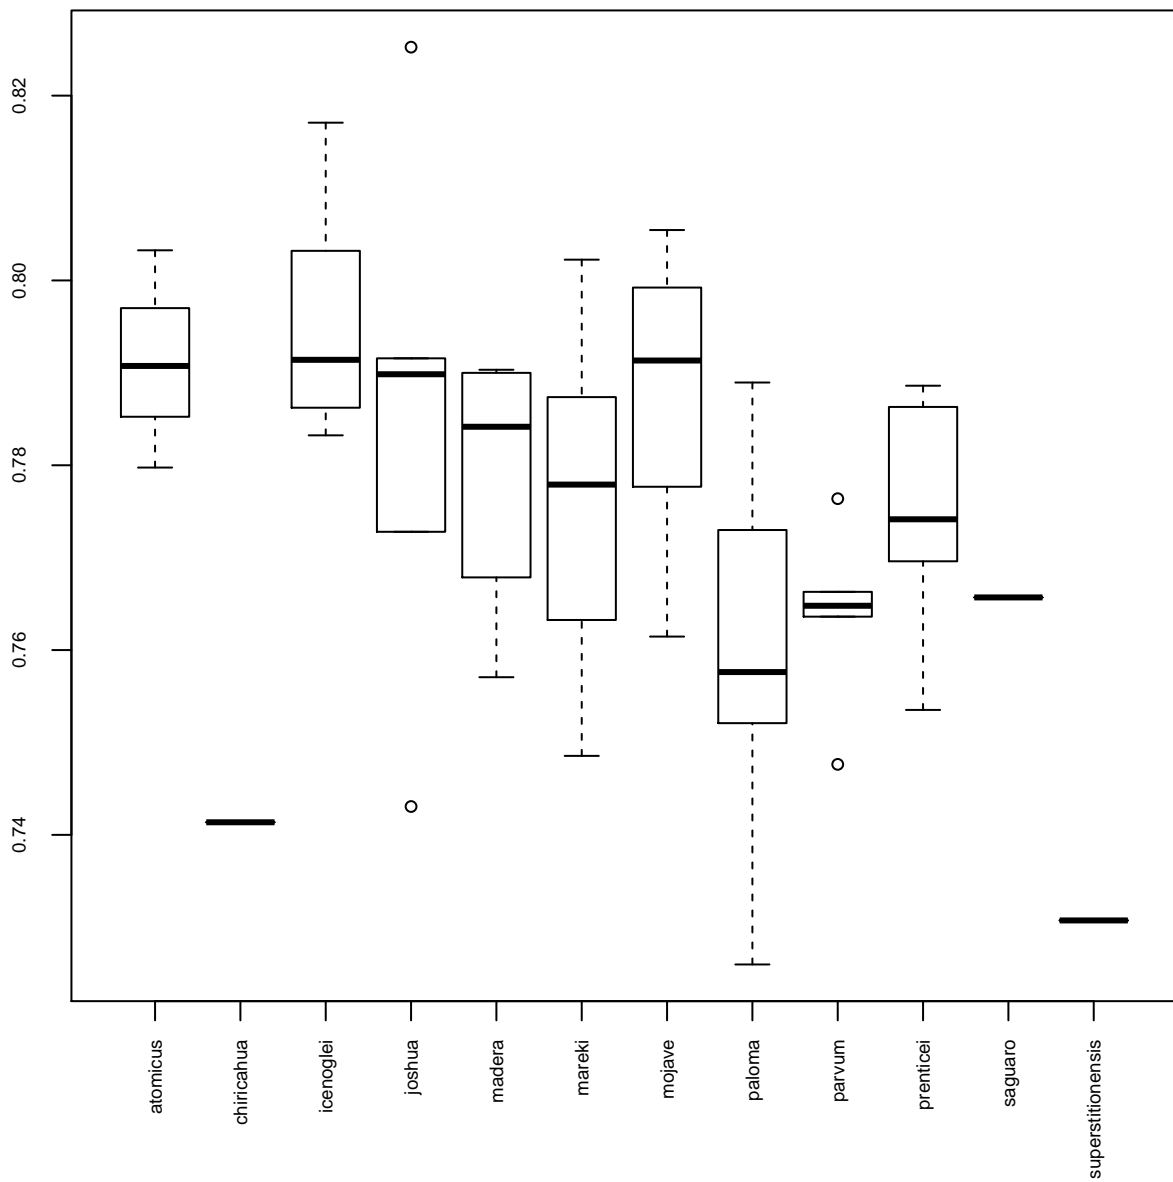

Supplement: Supplementary file 1163

## Palpal Tibia/Patella 1 Length ratio – males

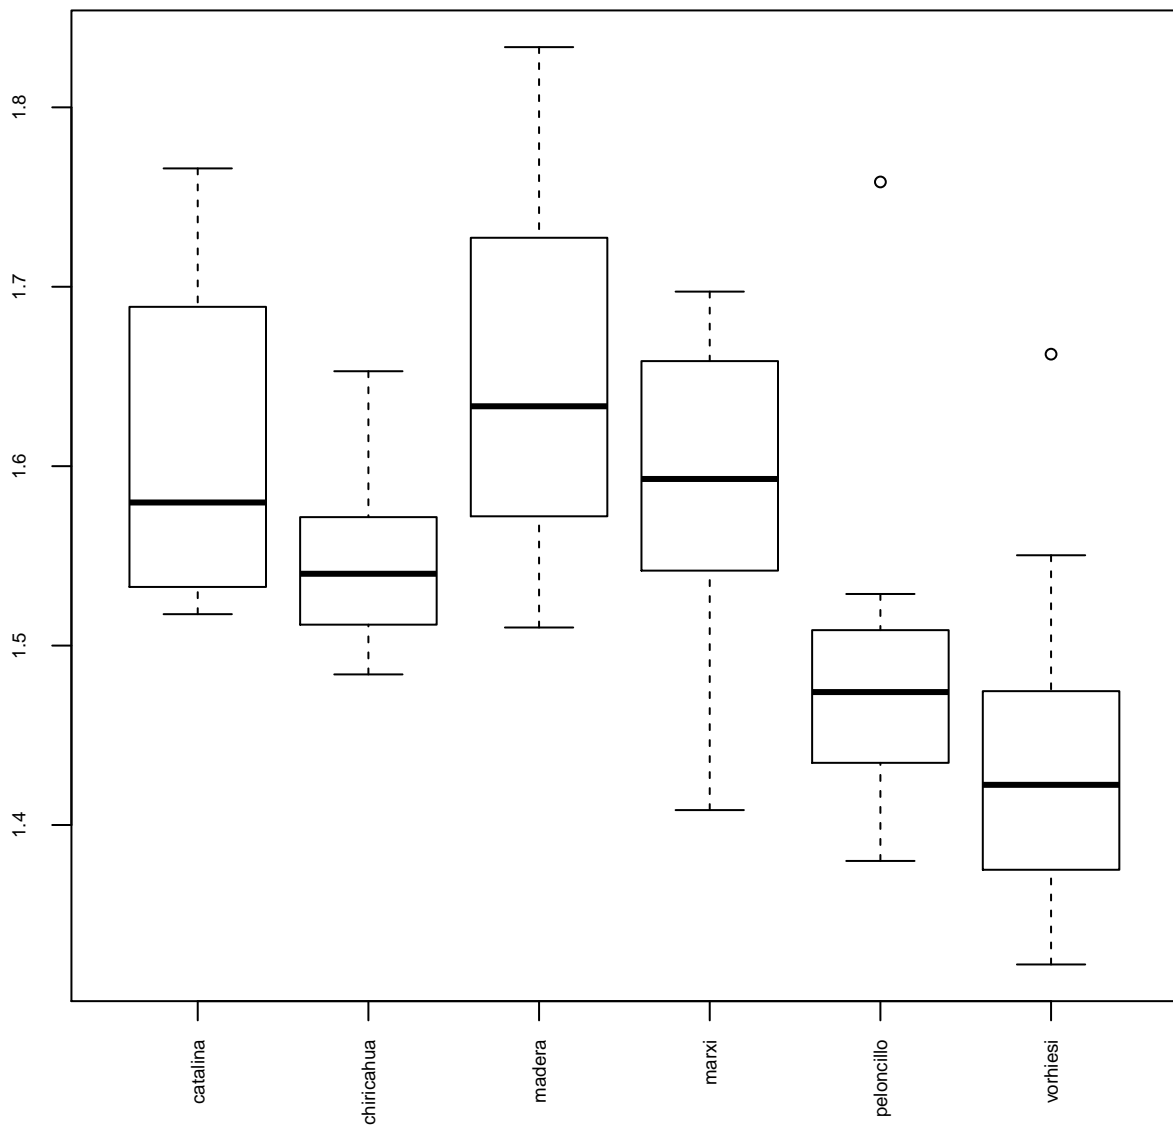

Supplement: Supplementary file 1164

## Tibia 4/Tarsus 4 ratio – males

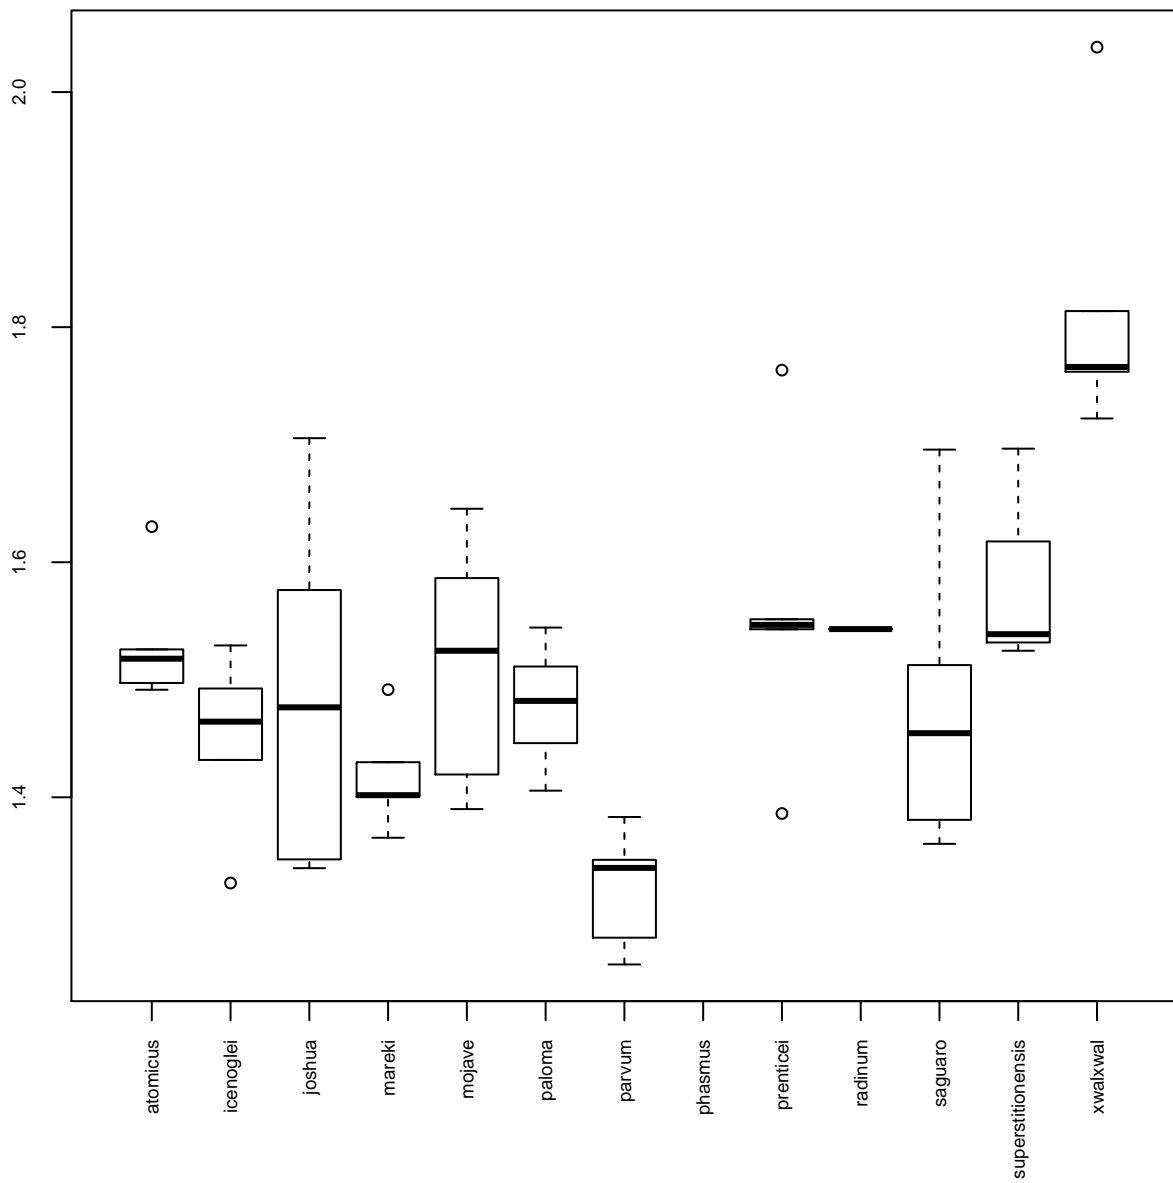

Supplement: Supplementary file 1165

## Metatarsus 1/Metatarsus 4 ratio – females

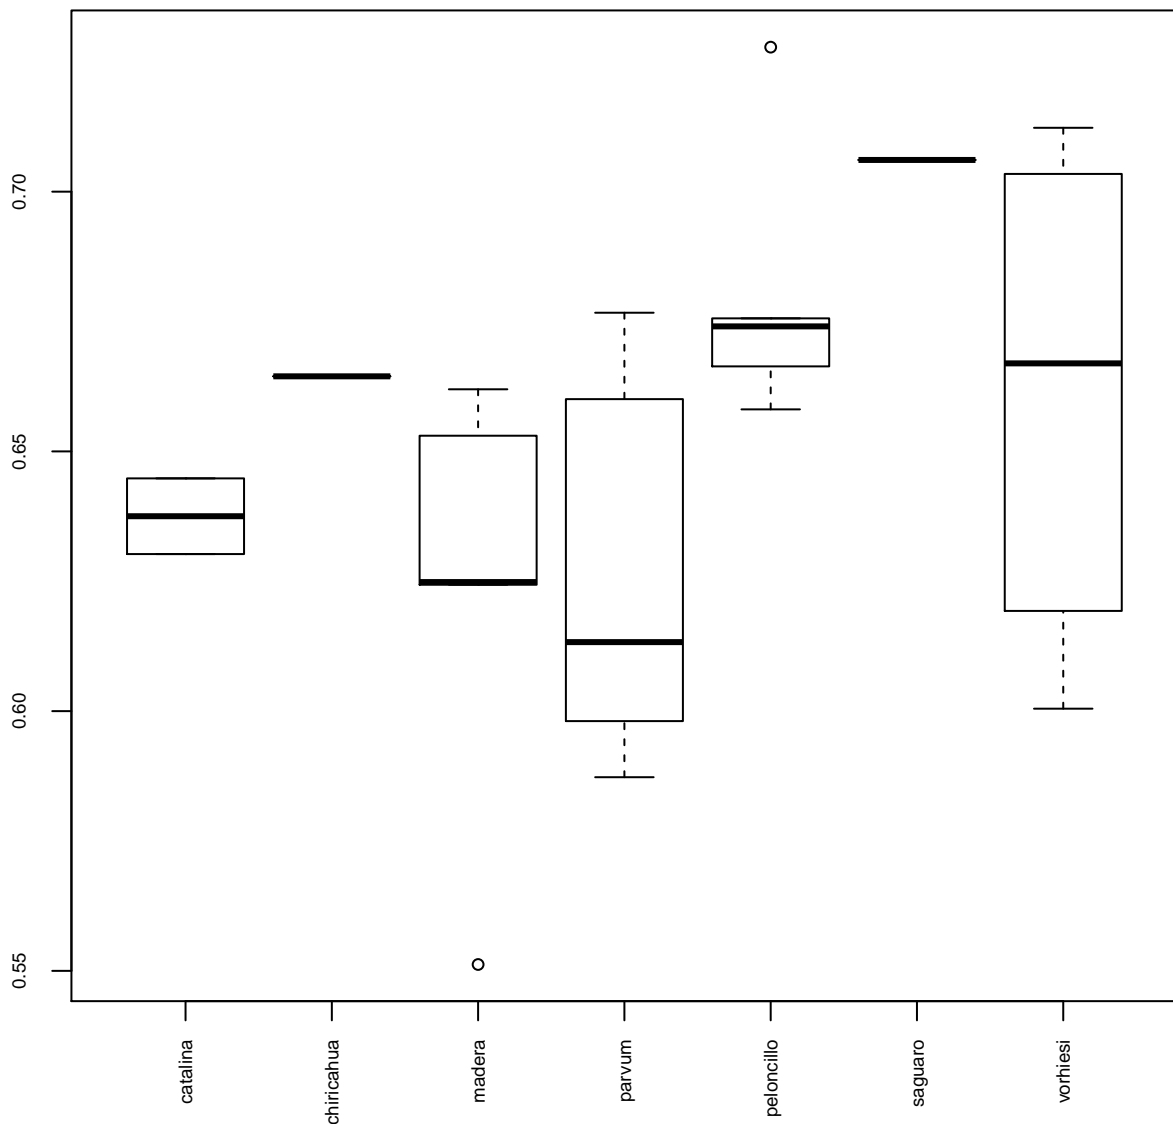

Supplement: Supplementary file 1166

# Leg 1/Leg 3 Length ratio – males

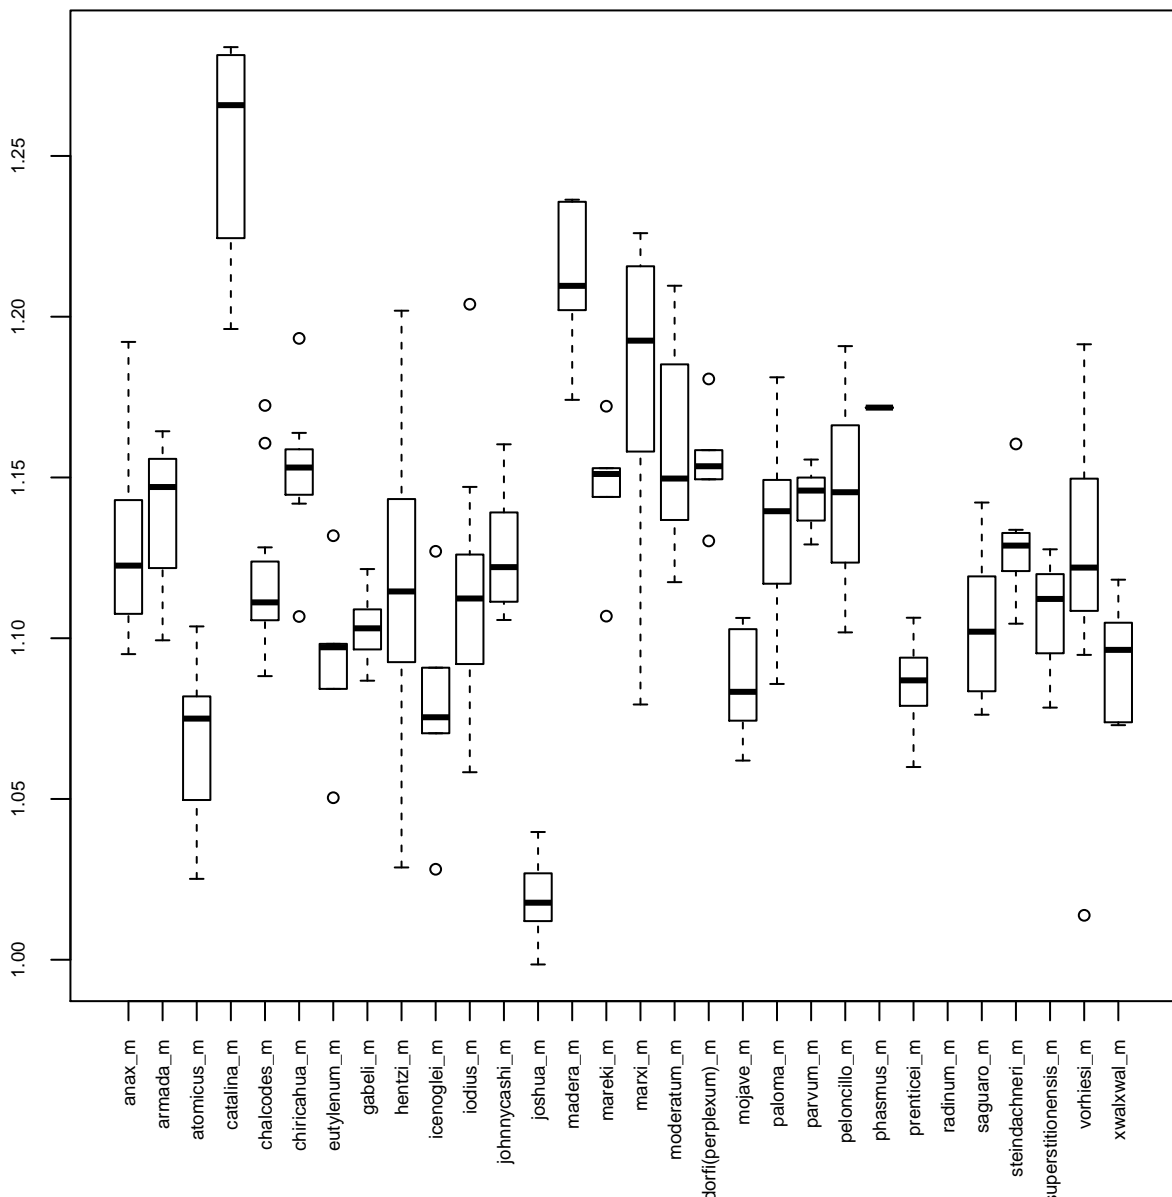

Supplement: Supplementary file 1167

## Patella 4/Tibia 4 ratio – females

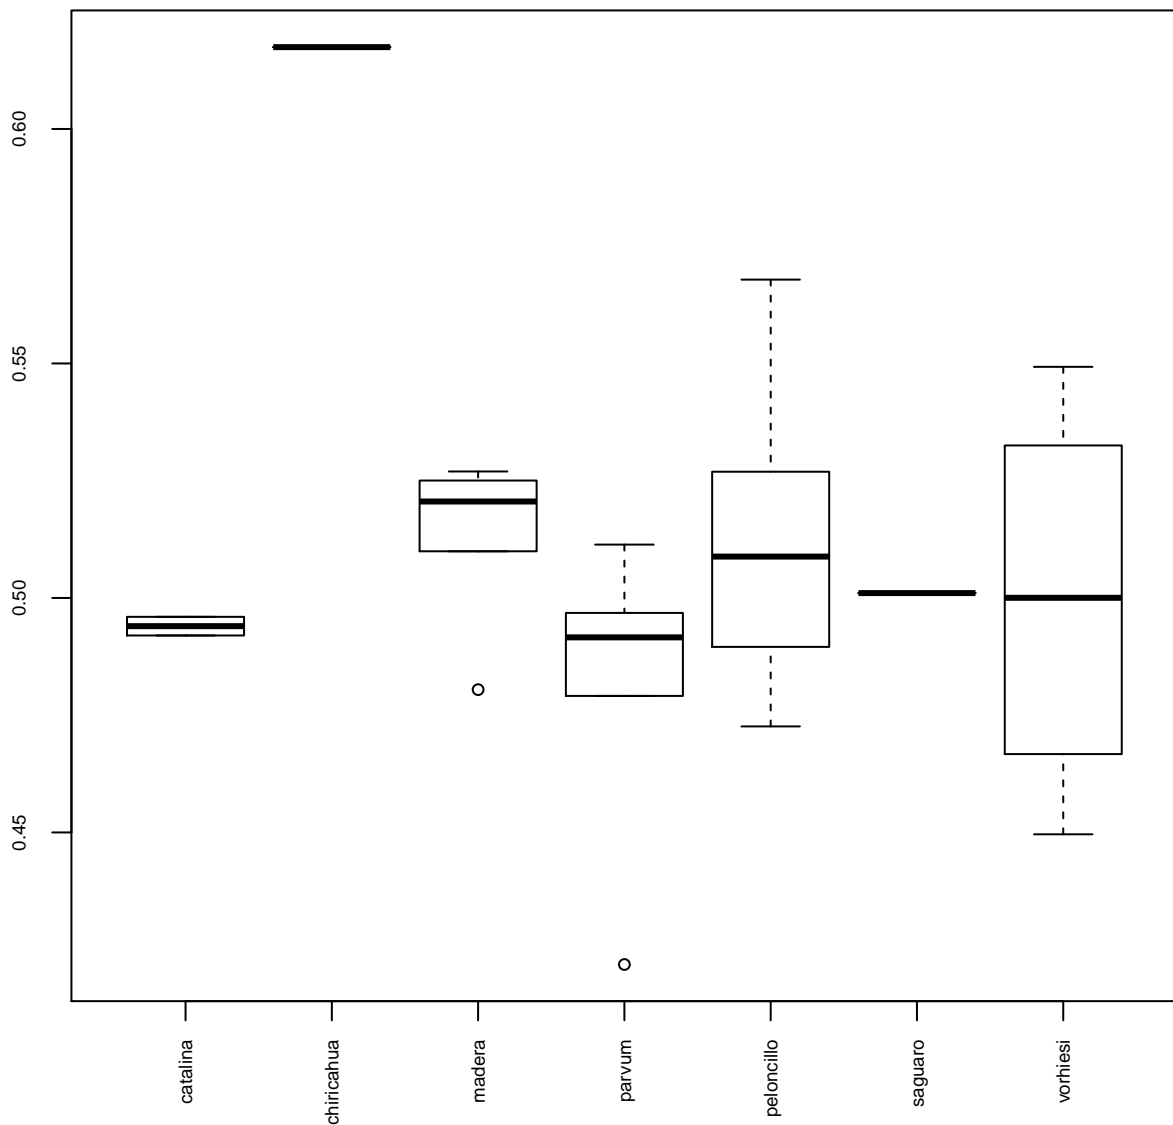

Supplement: Supplementary file 1168

## Palpal Tibia Length/Width ratio – males

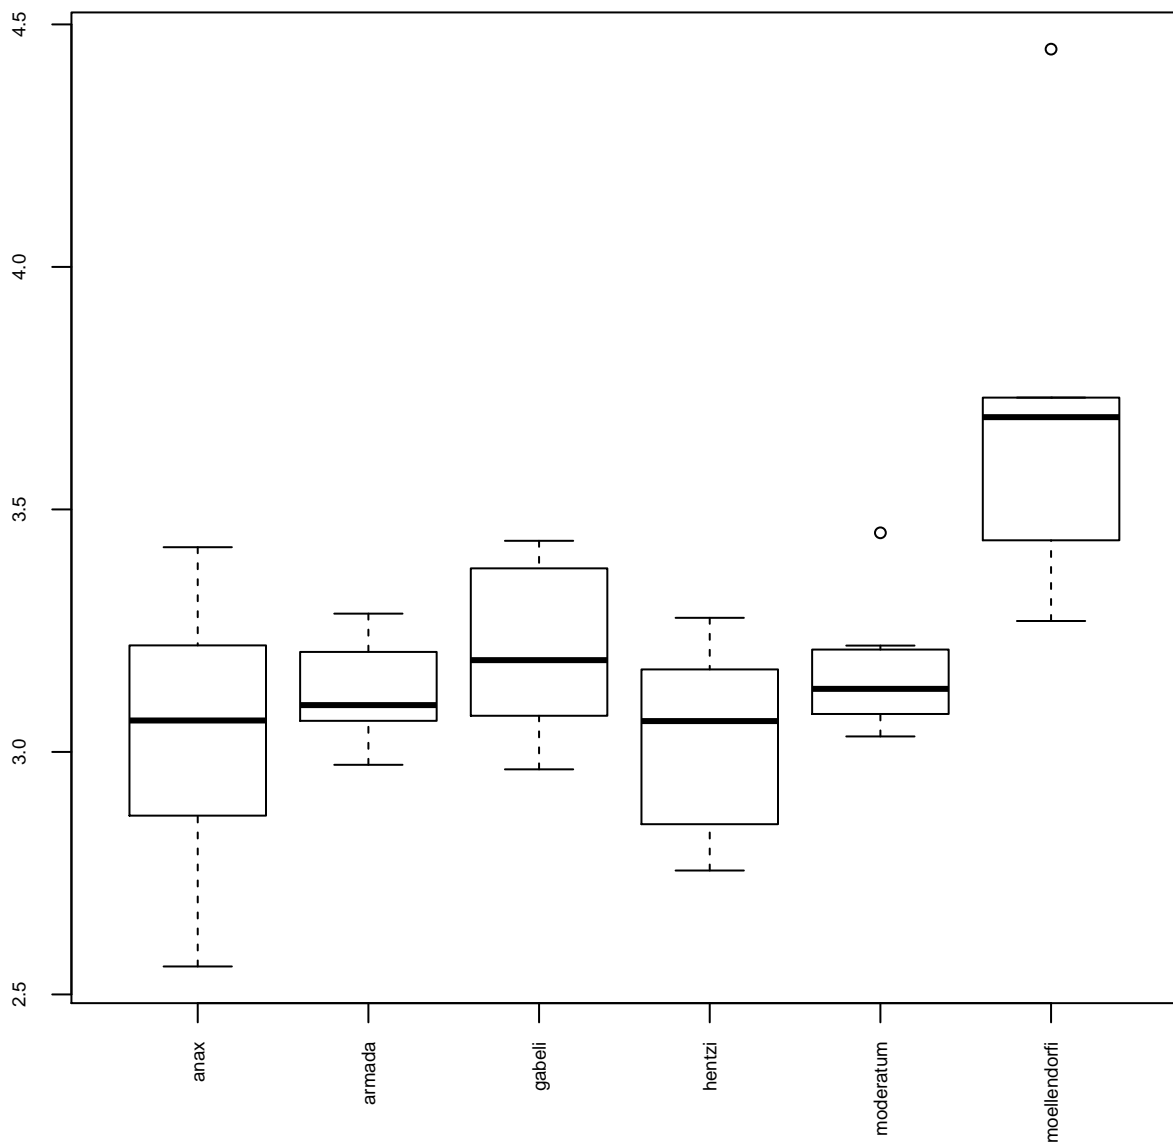

Supplement: Supplementary file 1169

## Leg 4 Length – females

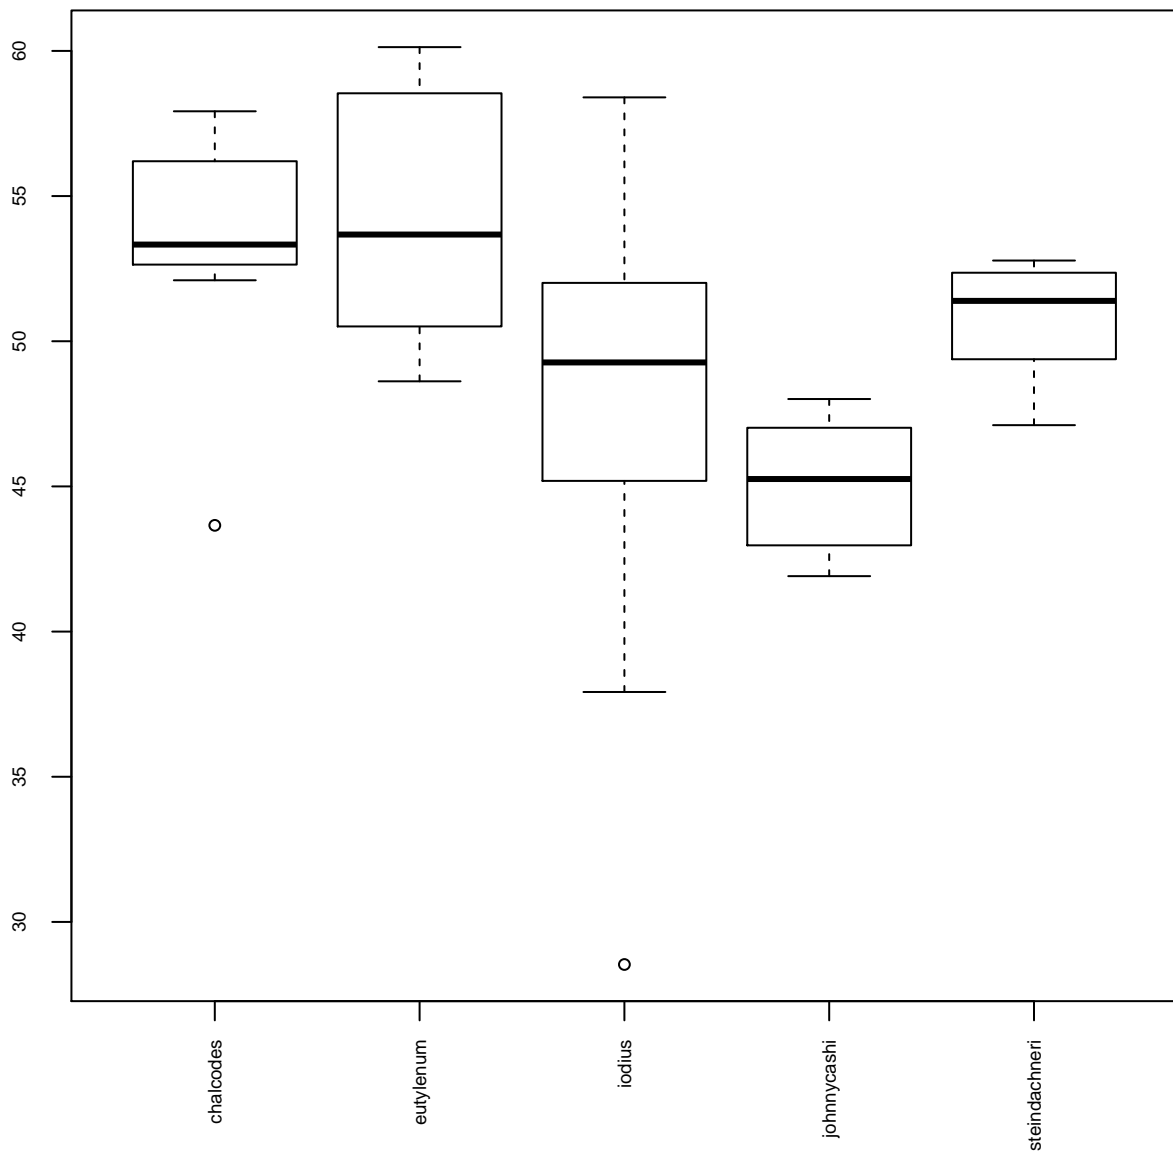

Supplement: Supplementary file 1170

## Tibia 3/Patella 4 Length ratio – females

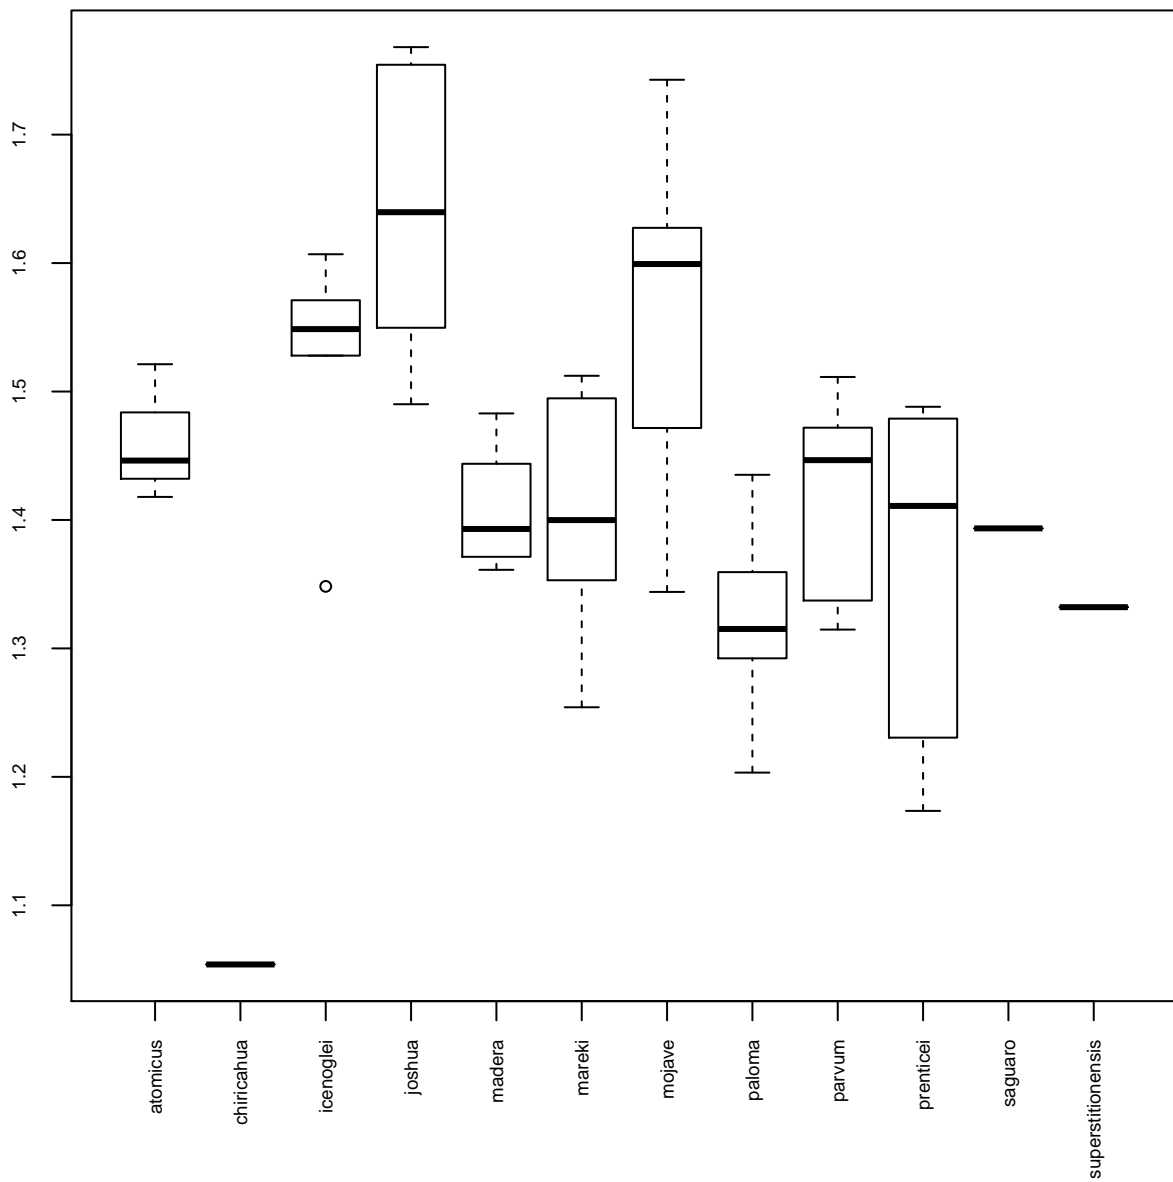

Supplement: Supplementary file 1171

# Carapace Length/Femur 3 ratio – females

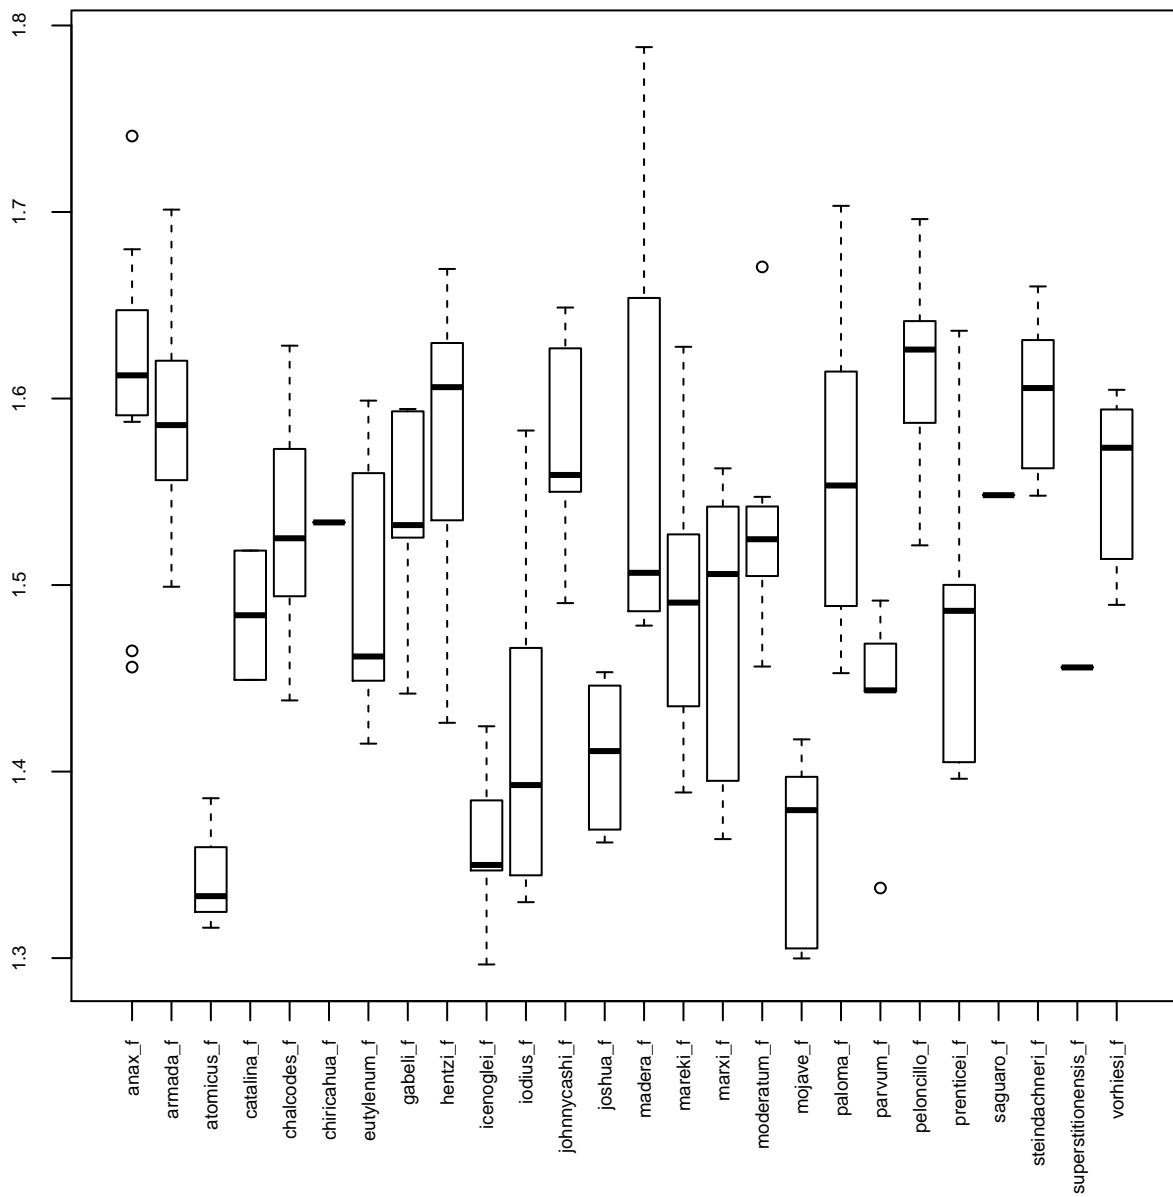

Supplement: Supplementary file 1172

## Patella 1/Tarsus 4 Length ratio – males

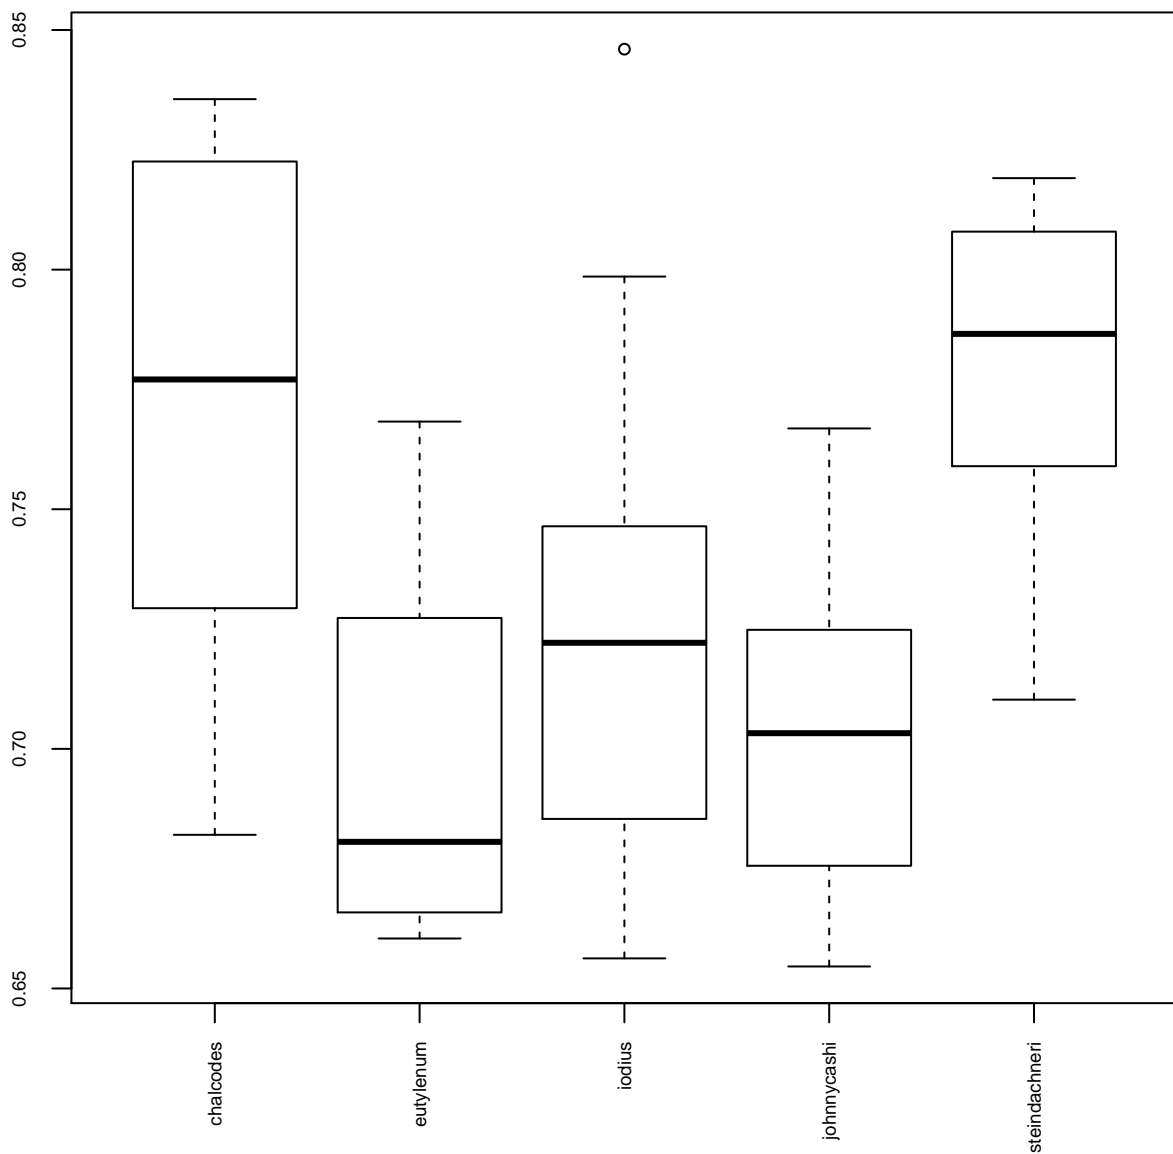

Supplement: Supplementary file 1173

## Leg 3 Length – males

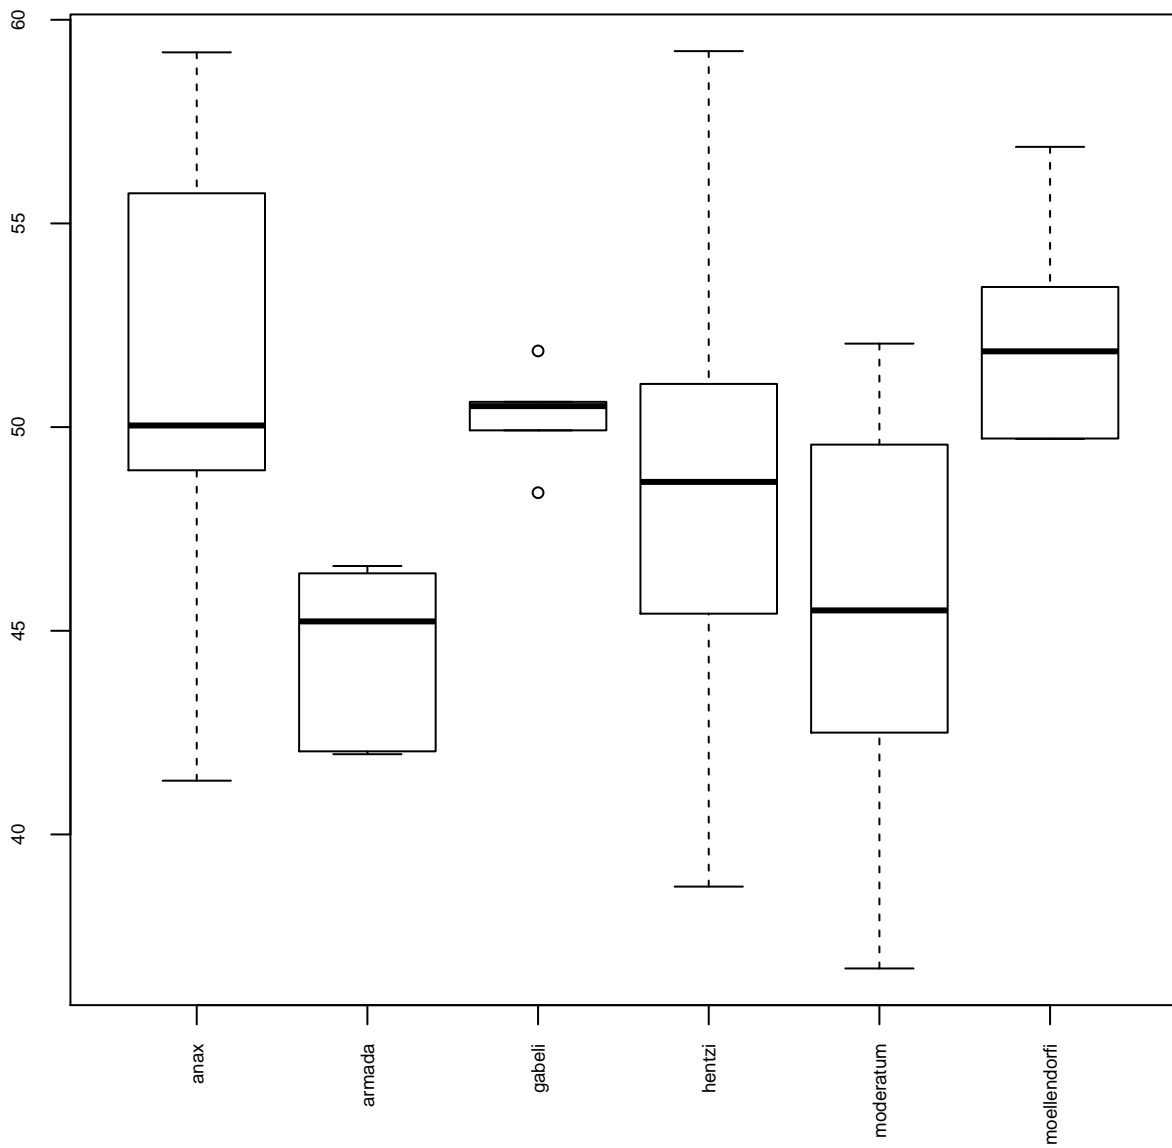

Supplement: Supplementary file 1174

## Metatarsus 3/Metatarsus 4 ratio – females

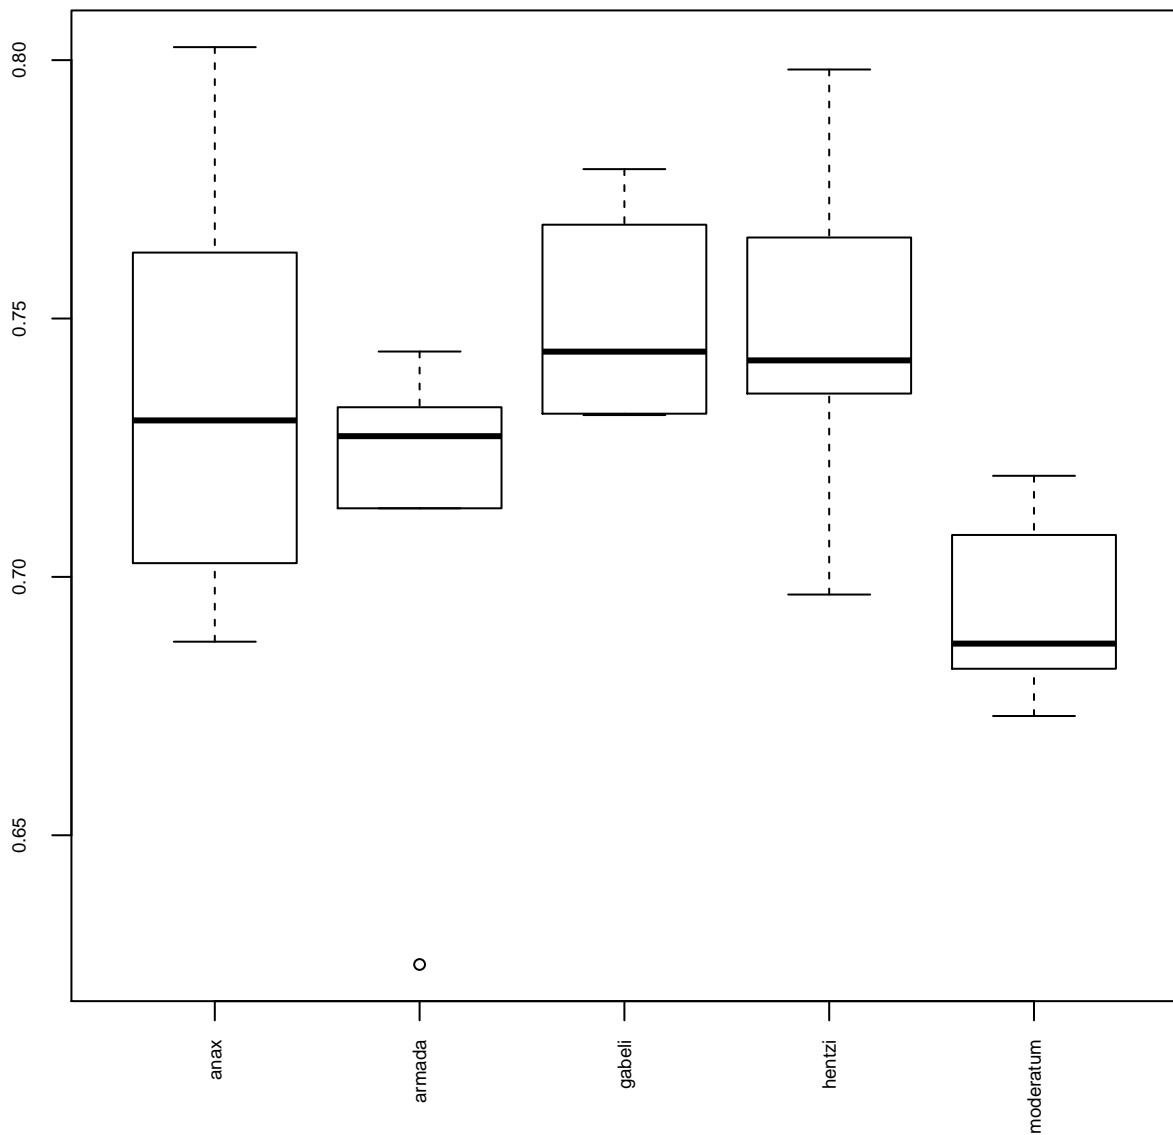

Supplement: Supplementary file 1175

## Patella 1/Tibia 1 ratio – females

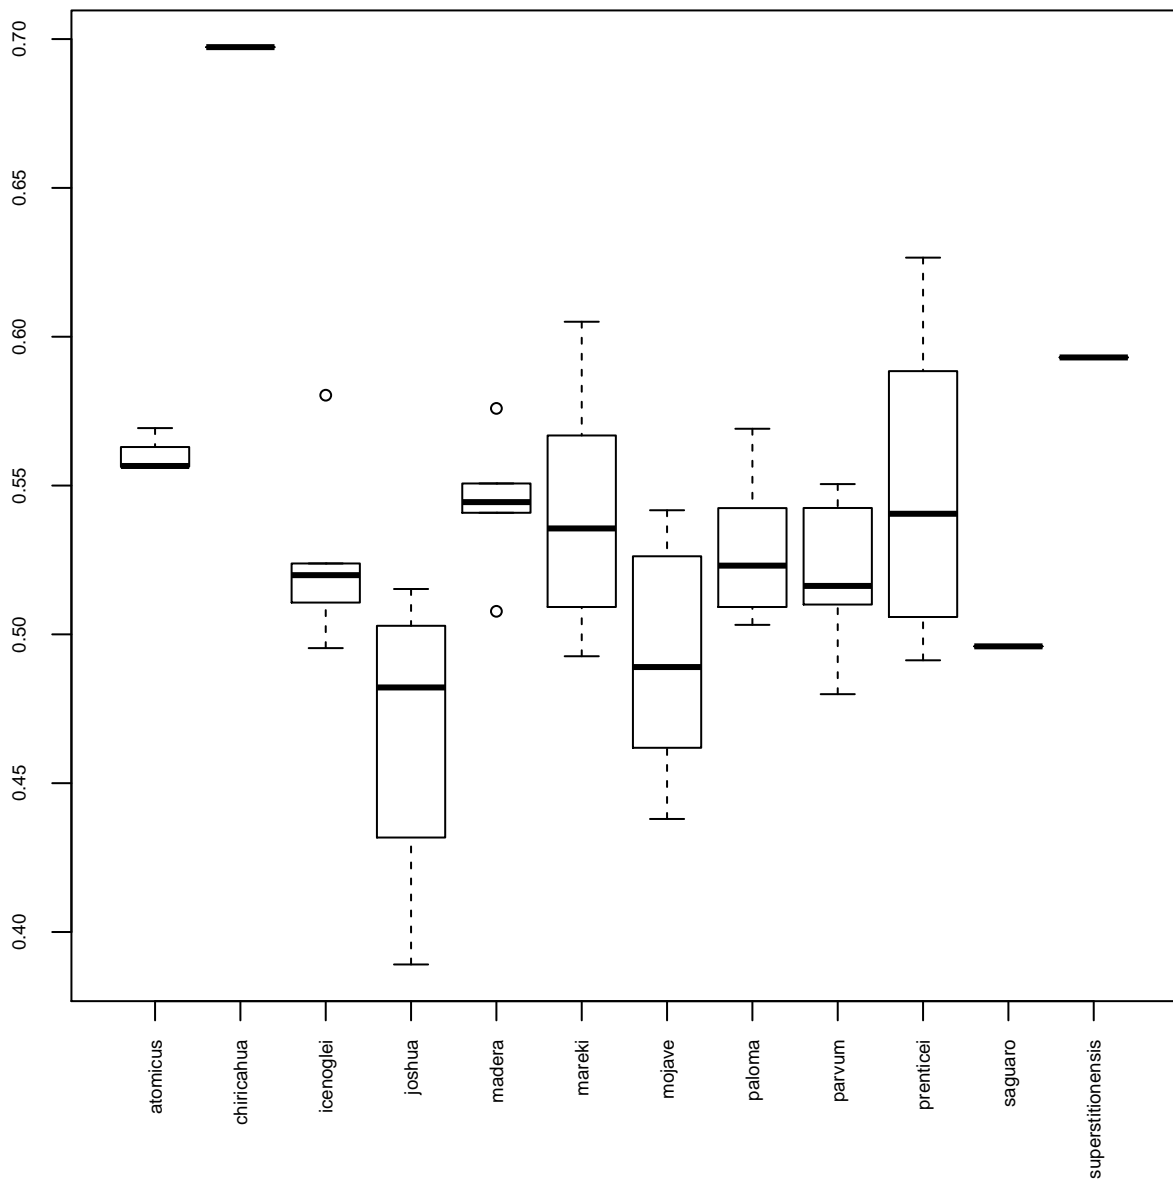

Supplement: Supplementary file 1176

## Femur 1/Tarsus 4 ratio – females

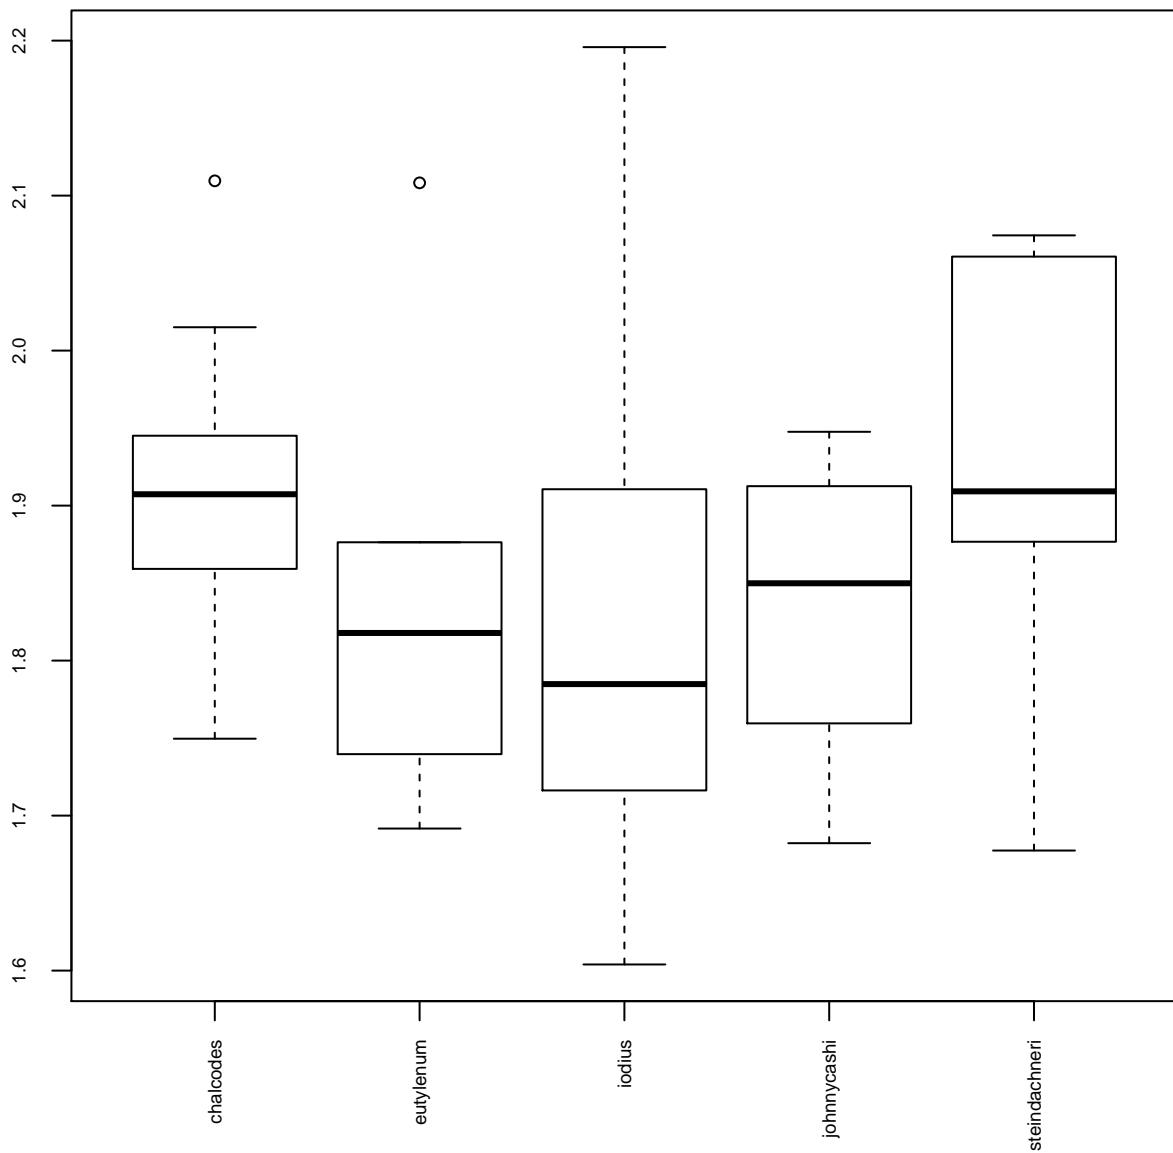

Supplement: Supplementary file 1177

# Carapace Length/Femur 4 ratio – females

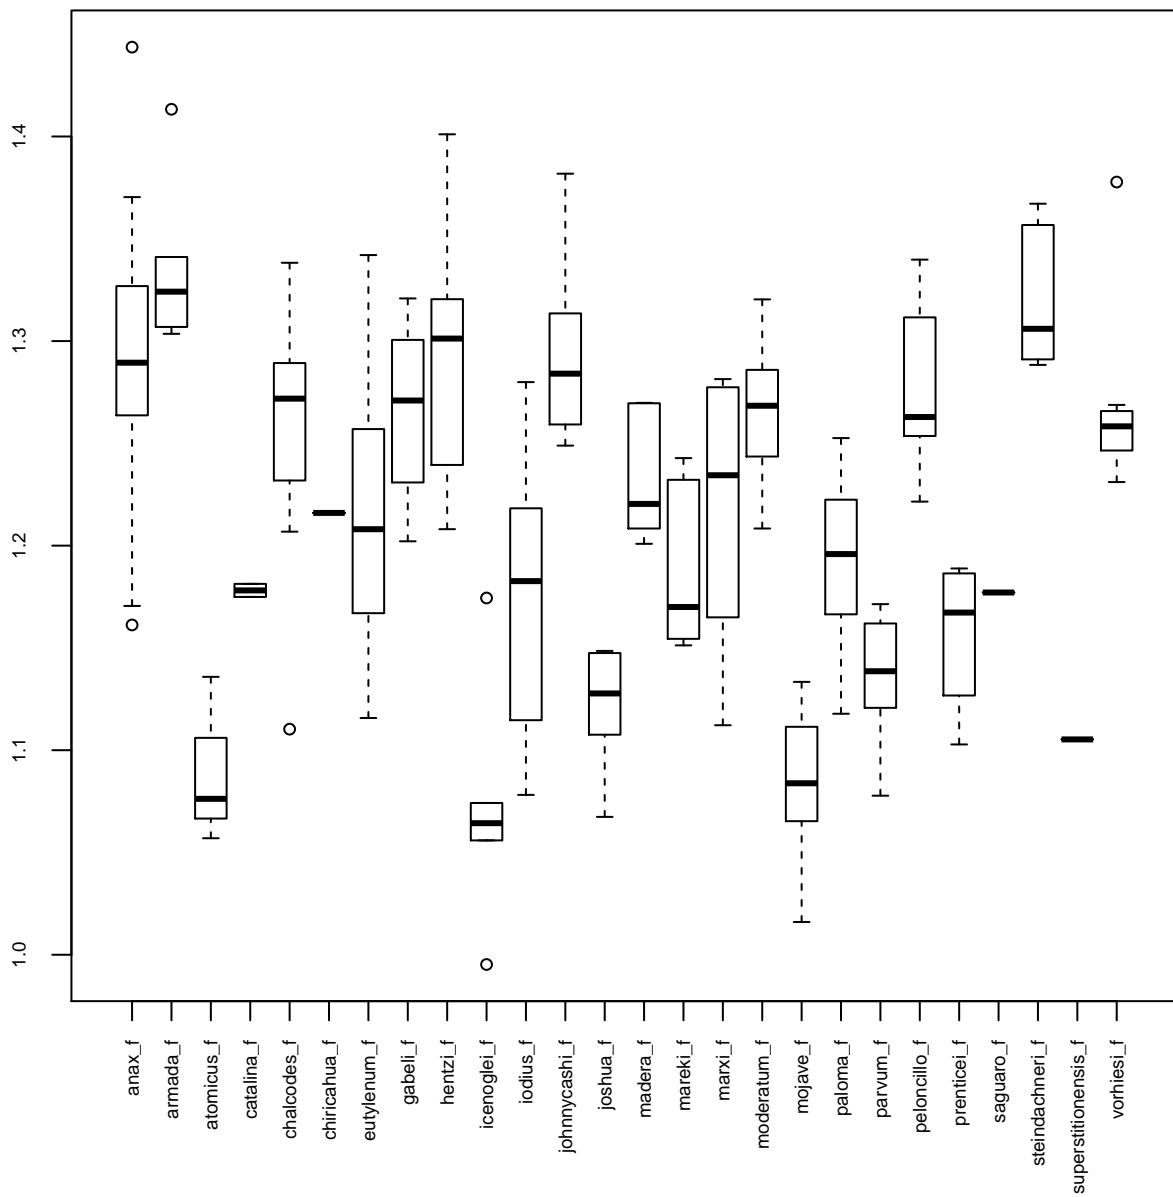

Supplement: Supplementary file 1178

## Patella 1/Tibia 3 Length ratio – males

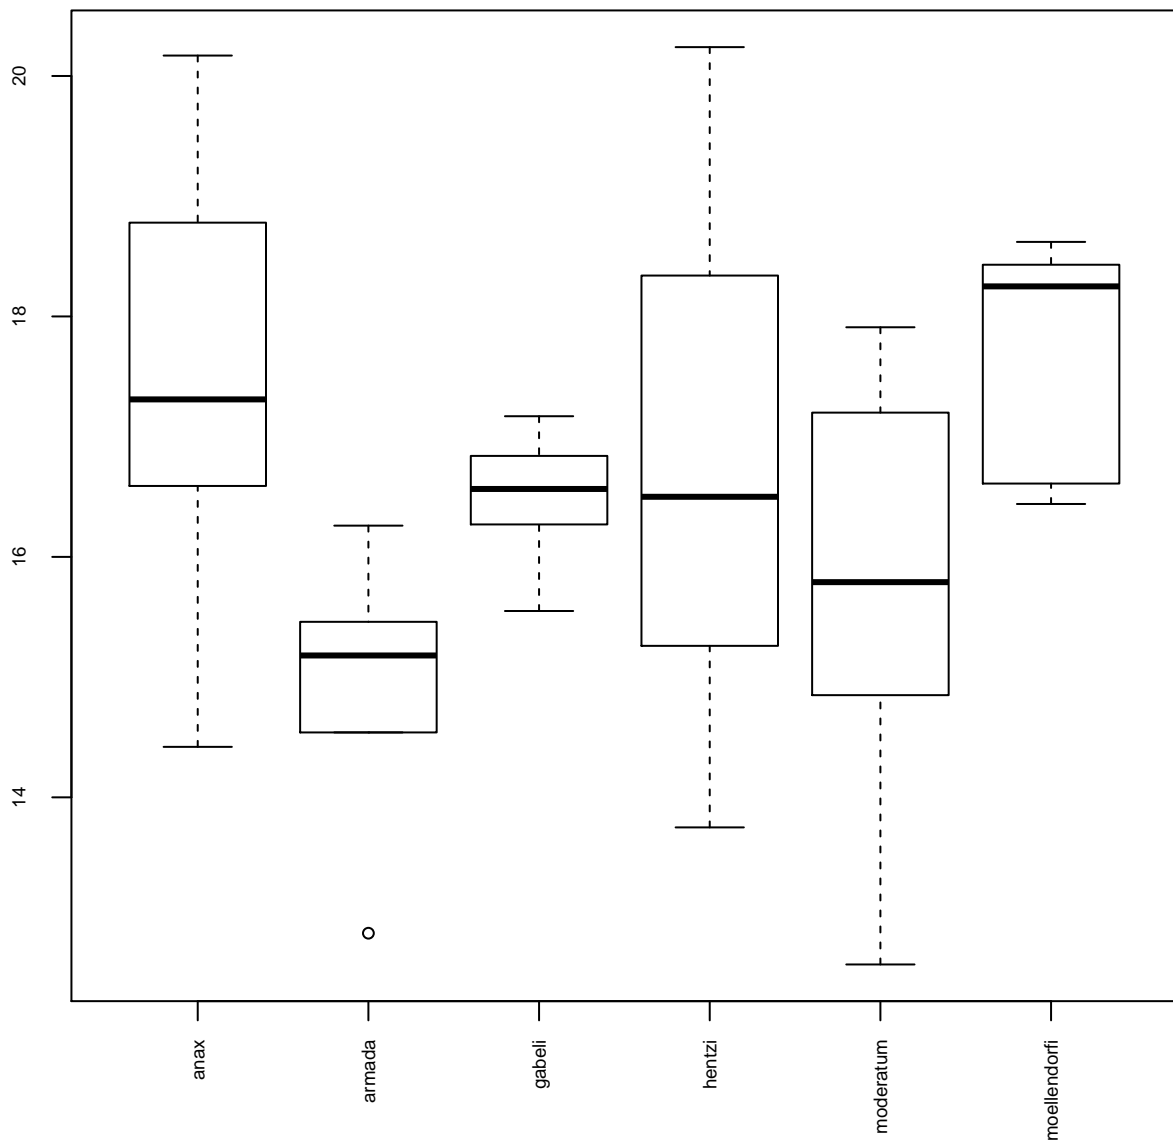

Supplement: Supplementary file 1179

# Patella 3/Metatarsus 3 ratio – males

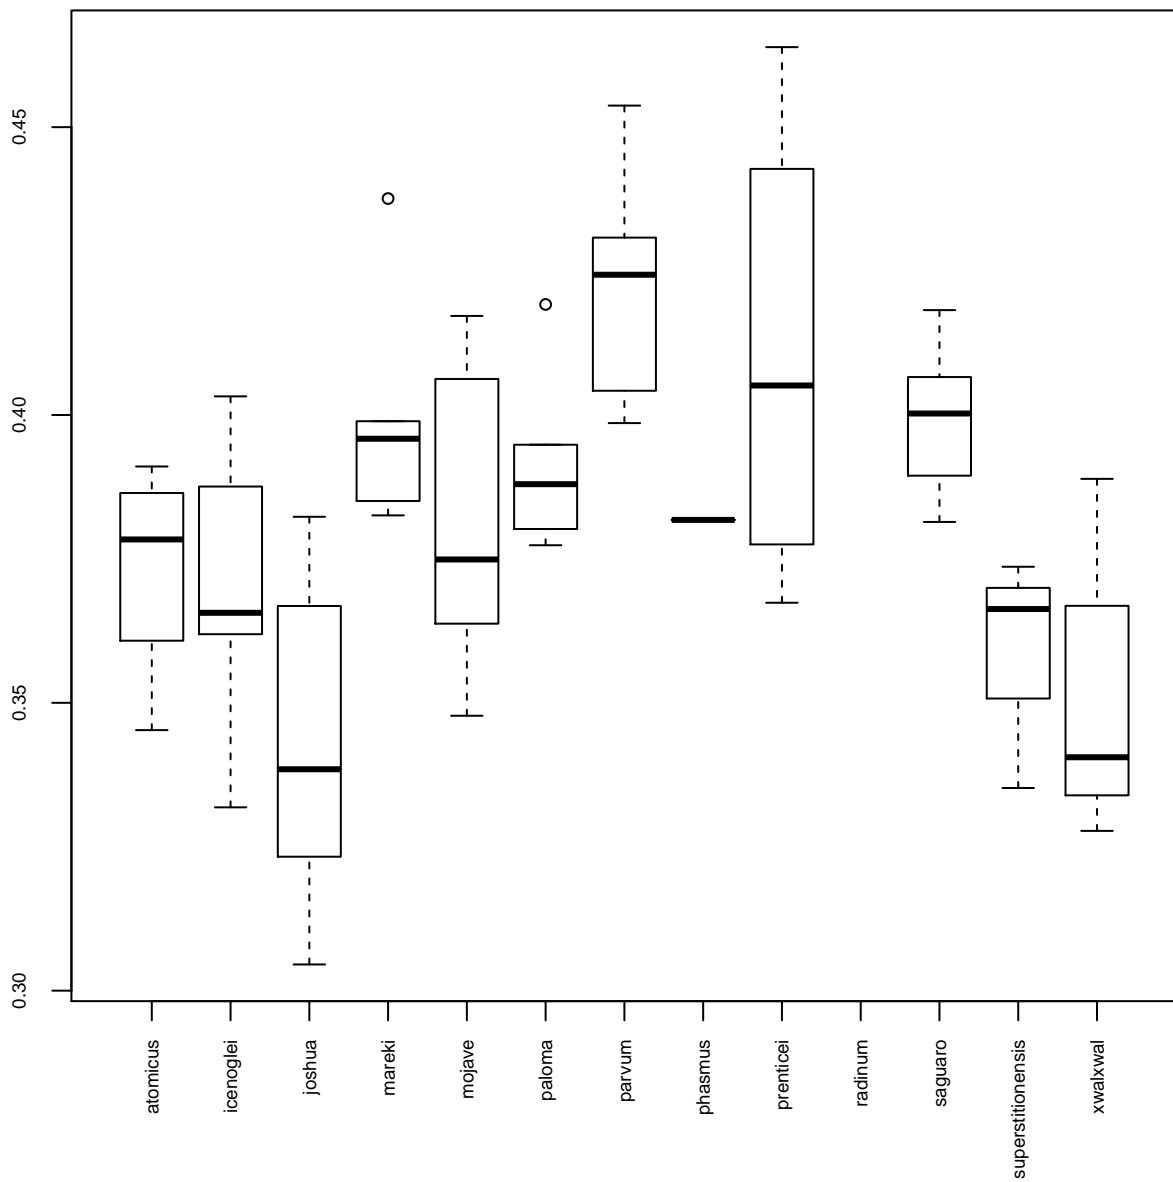

Supplement: Supplementary file 1180

## Femur 3/Metatarsus 3 ratio – males

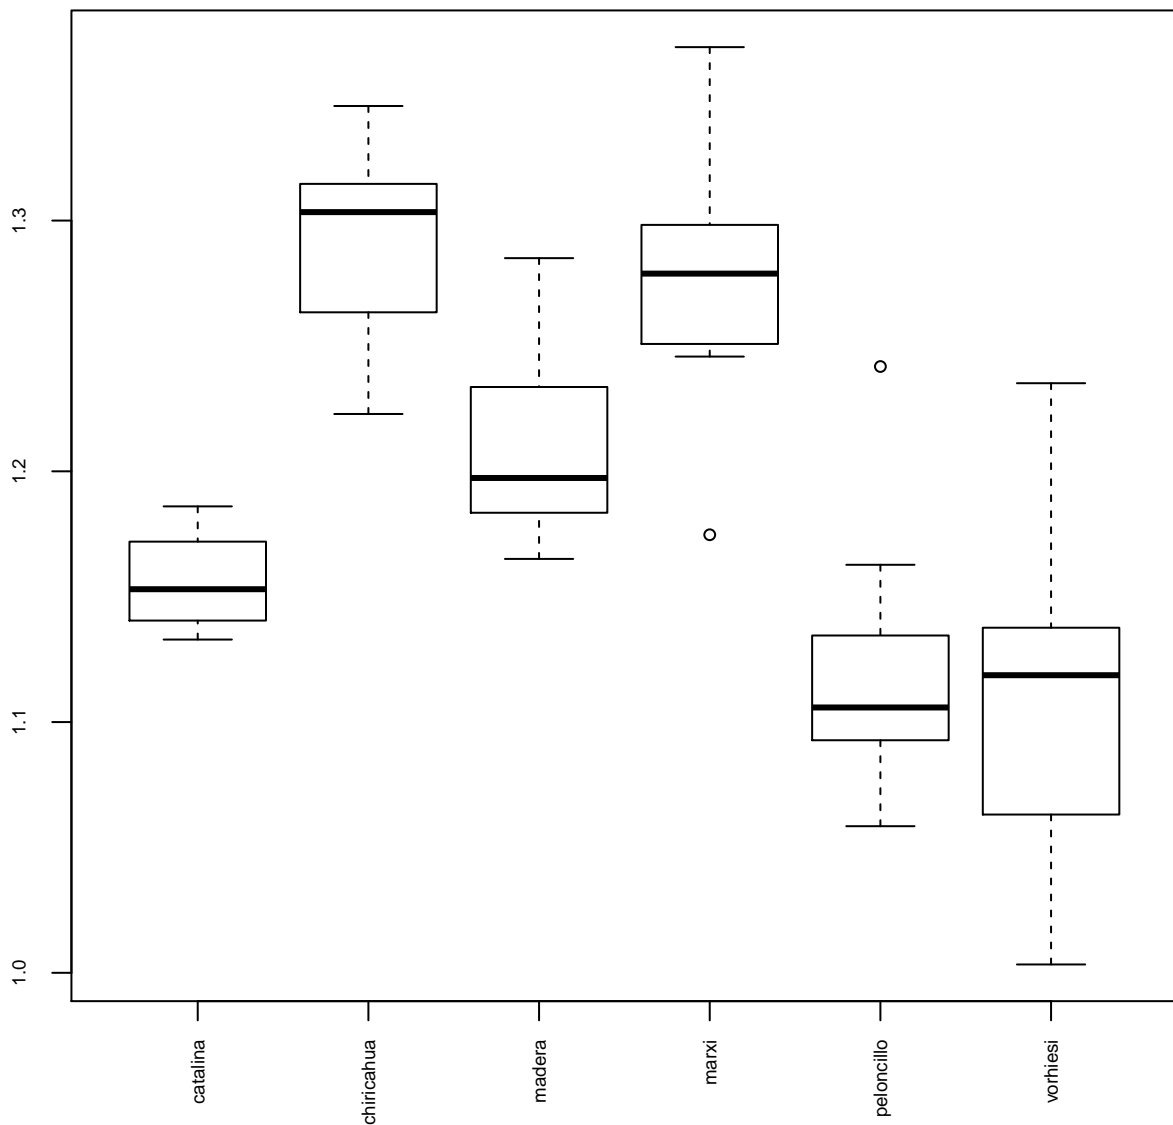

Supplement: Supplementary file 1181

# Tibia 3/Tibia 4 ratio – males

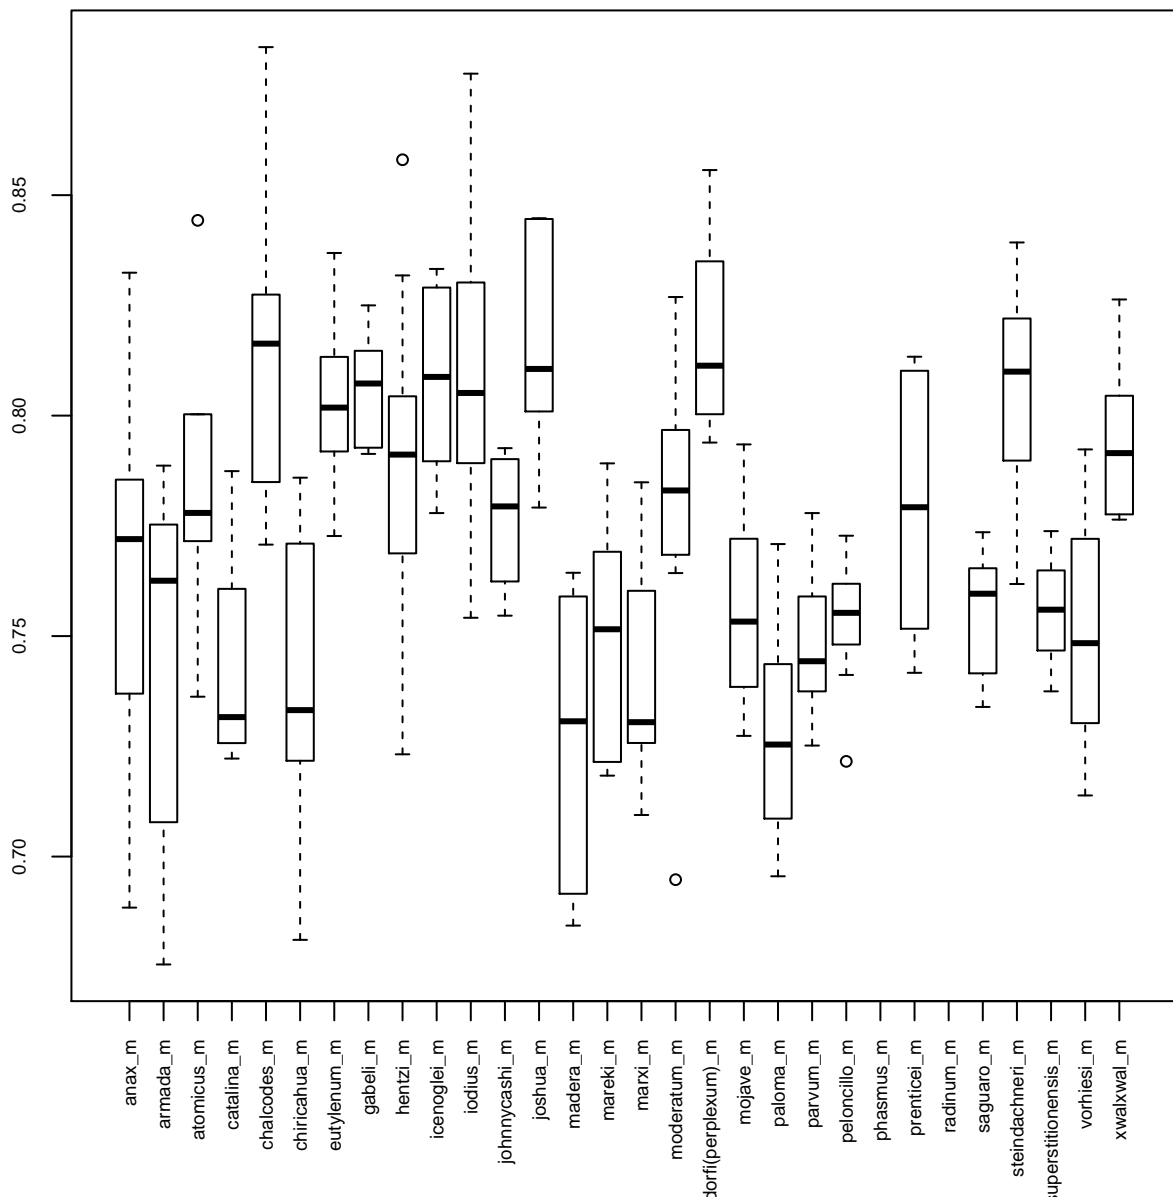

Supplement: Supplementary file 1182

## Femur 1/Tibia 3 ratio – females

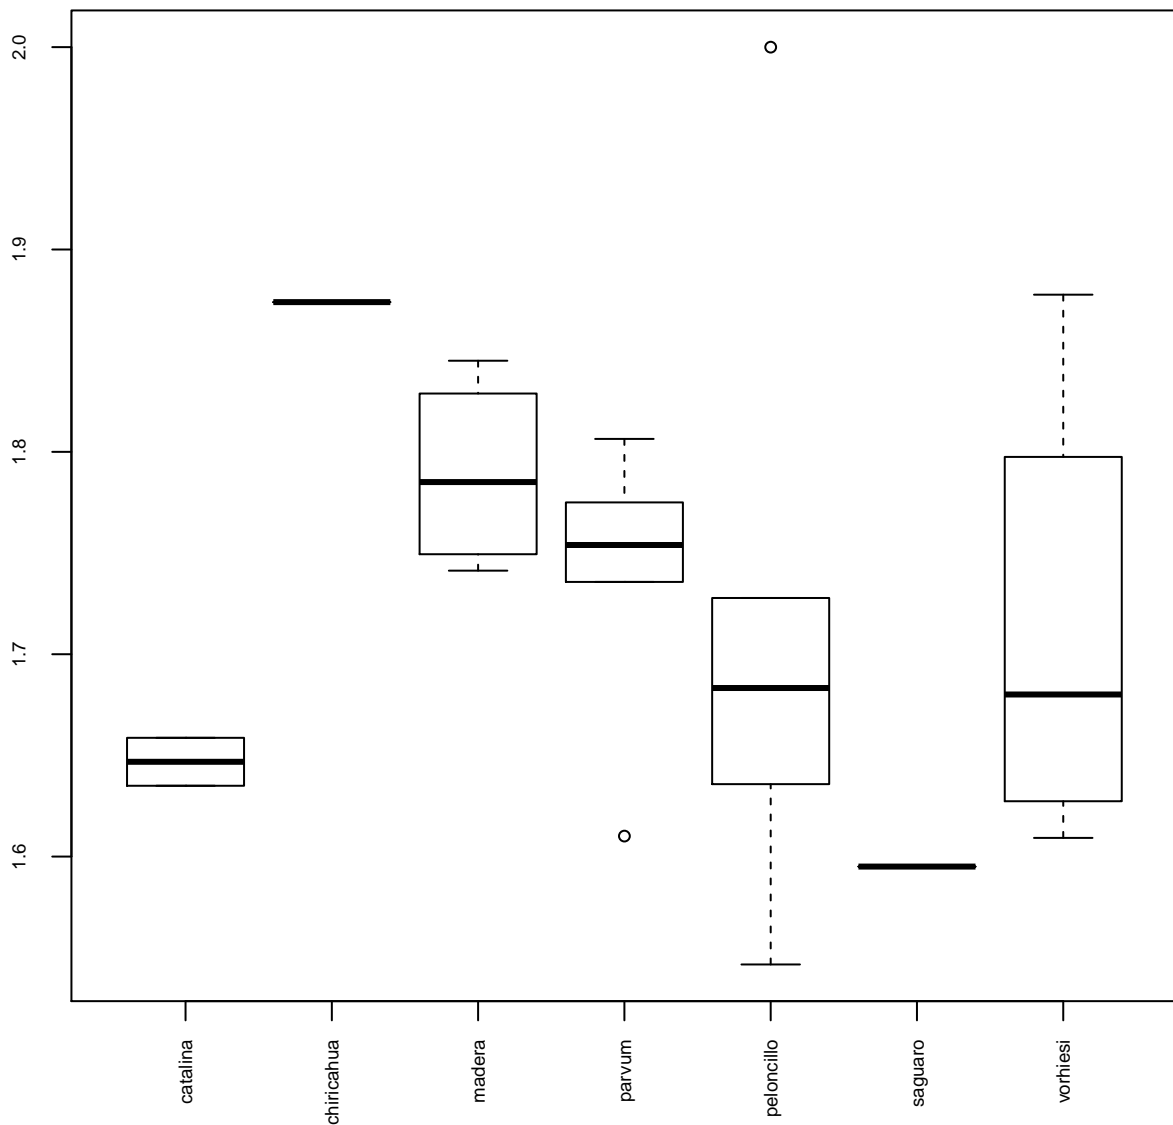

Supplement: Supplementary file 1183

## Femur 1/Tibia 1 ratio – males

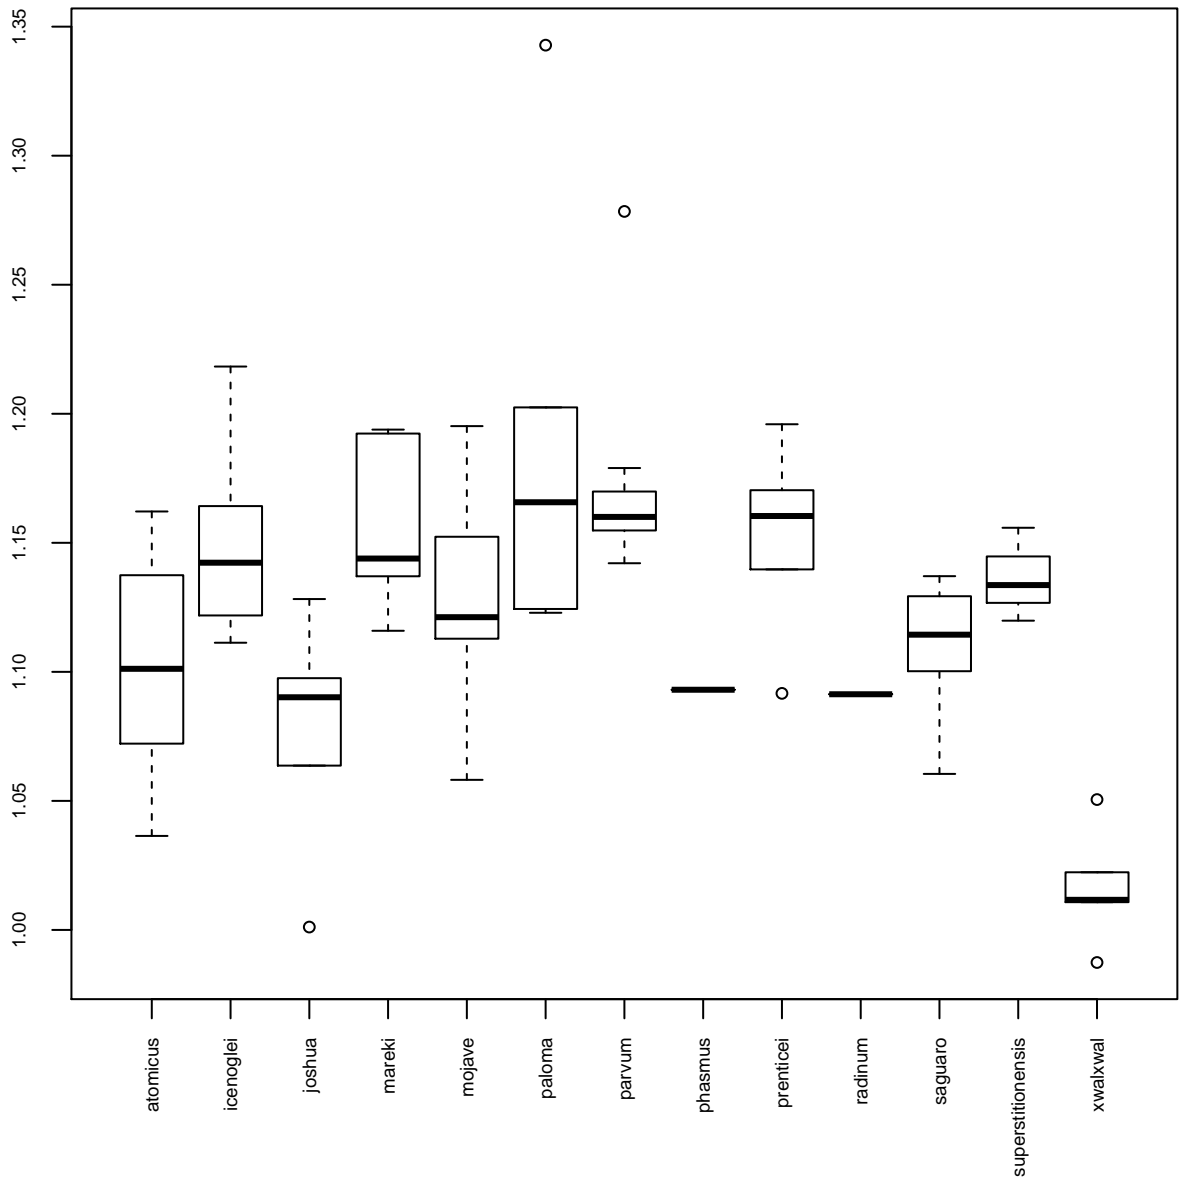

Supplement: Supplementary file 1184

## Femur 1/Patella 1 ratio – females

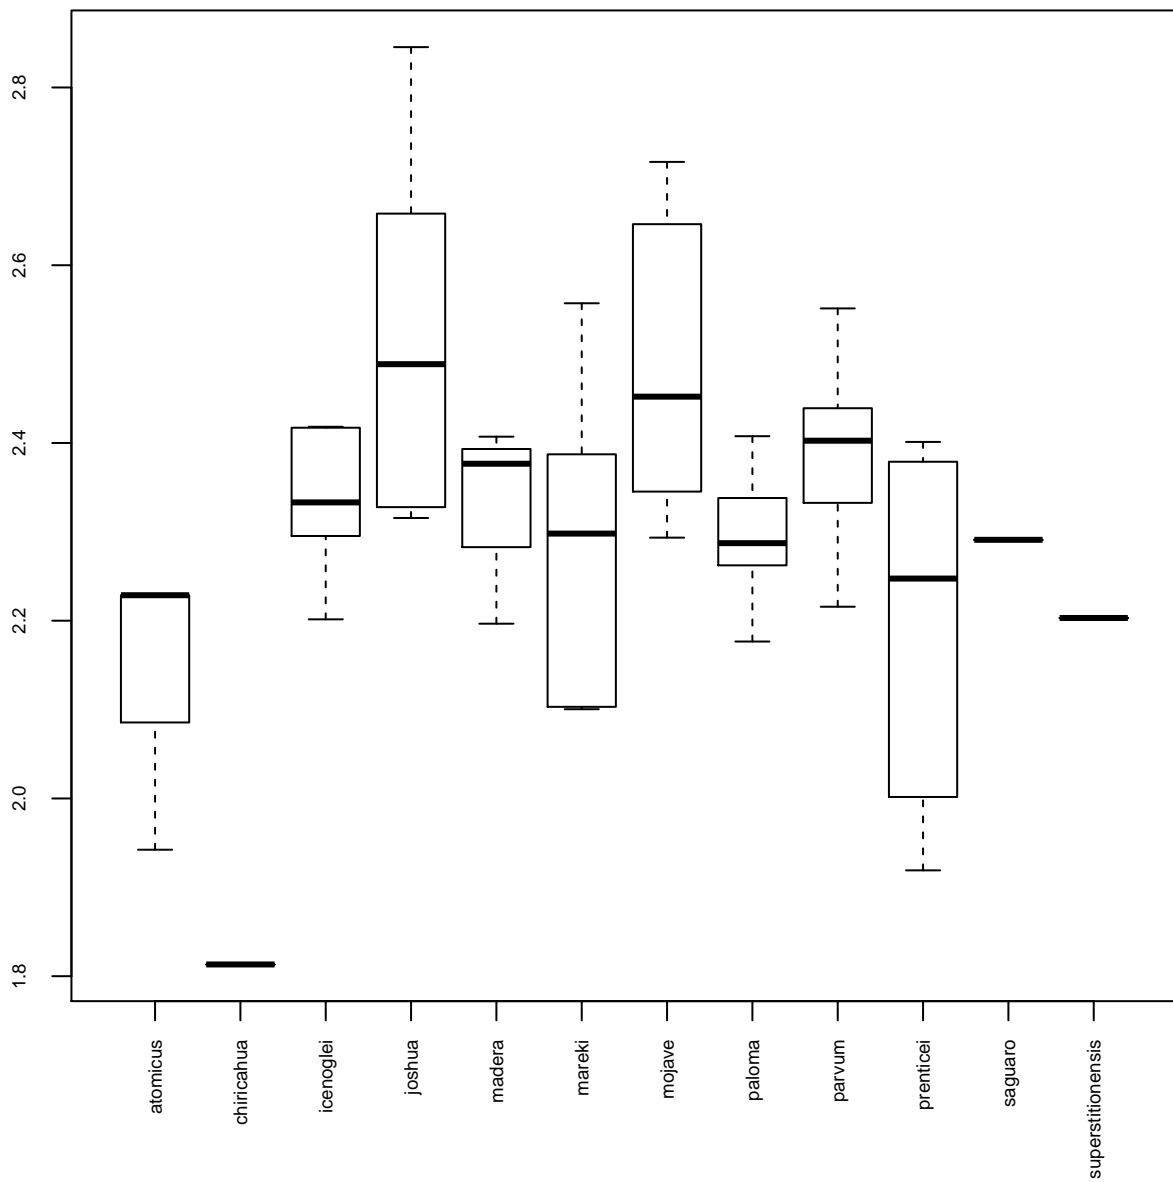

Supplement: Supplementary file 1185

# Tarsus 1/Tibia 3 Length ratio – males

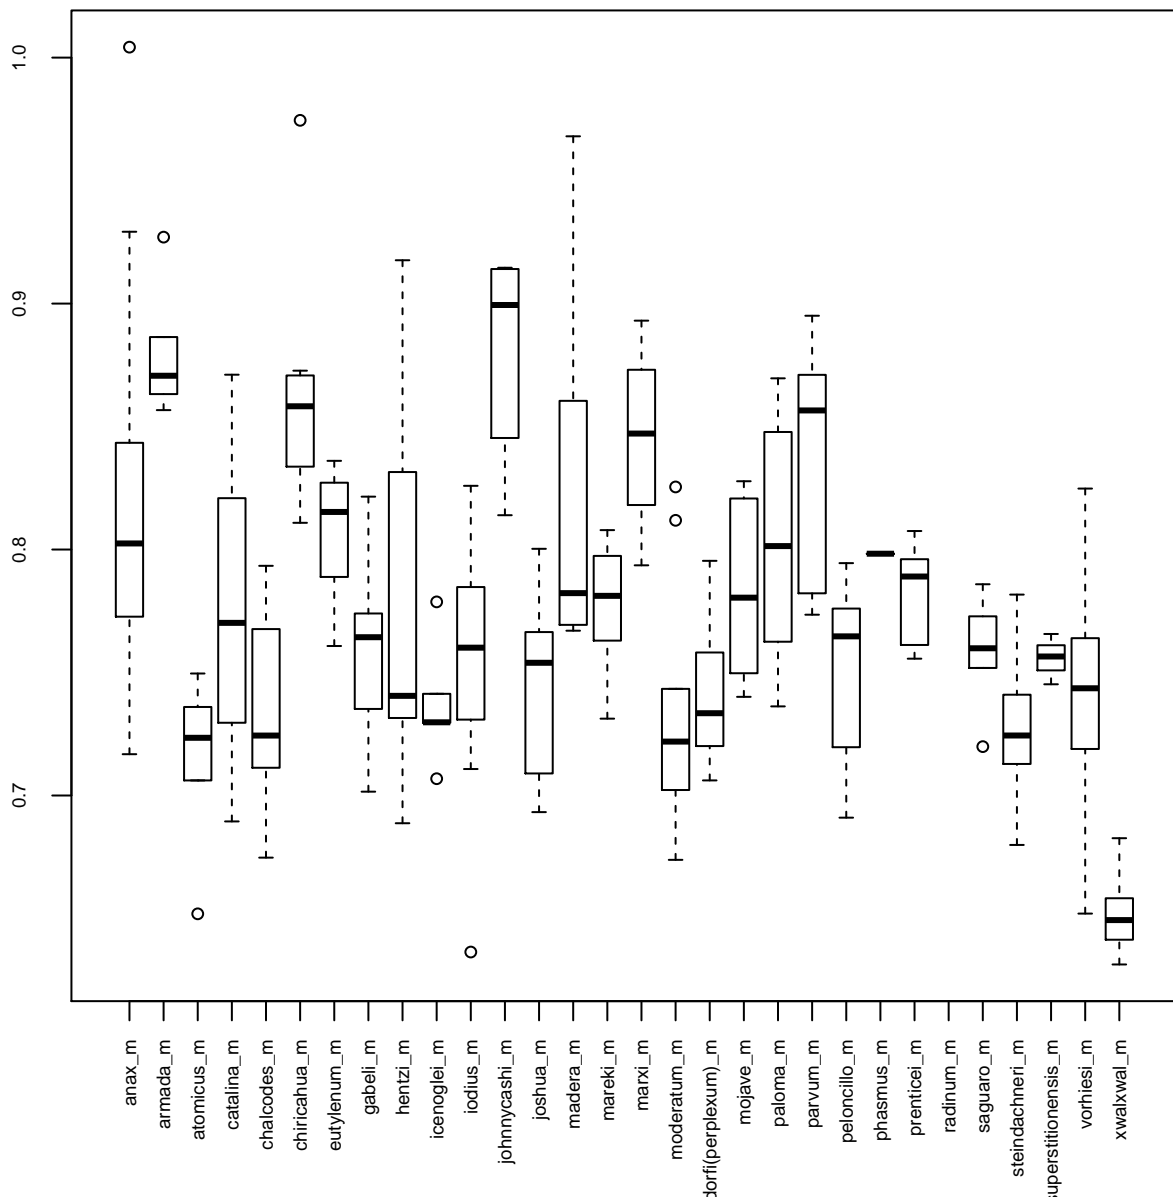

Supplement: Supplementary file 1186

## Metatarsus 3/Patella 4 Length ratio – females

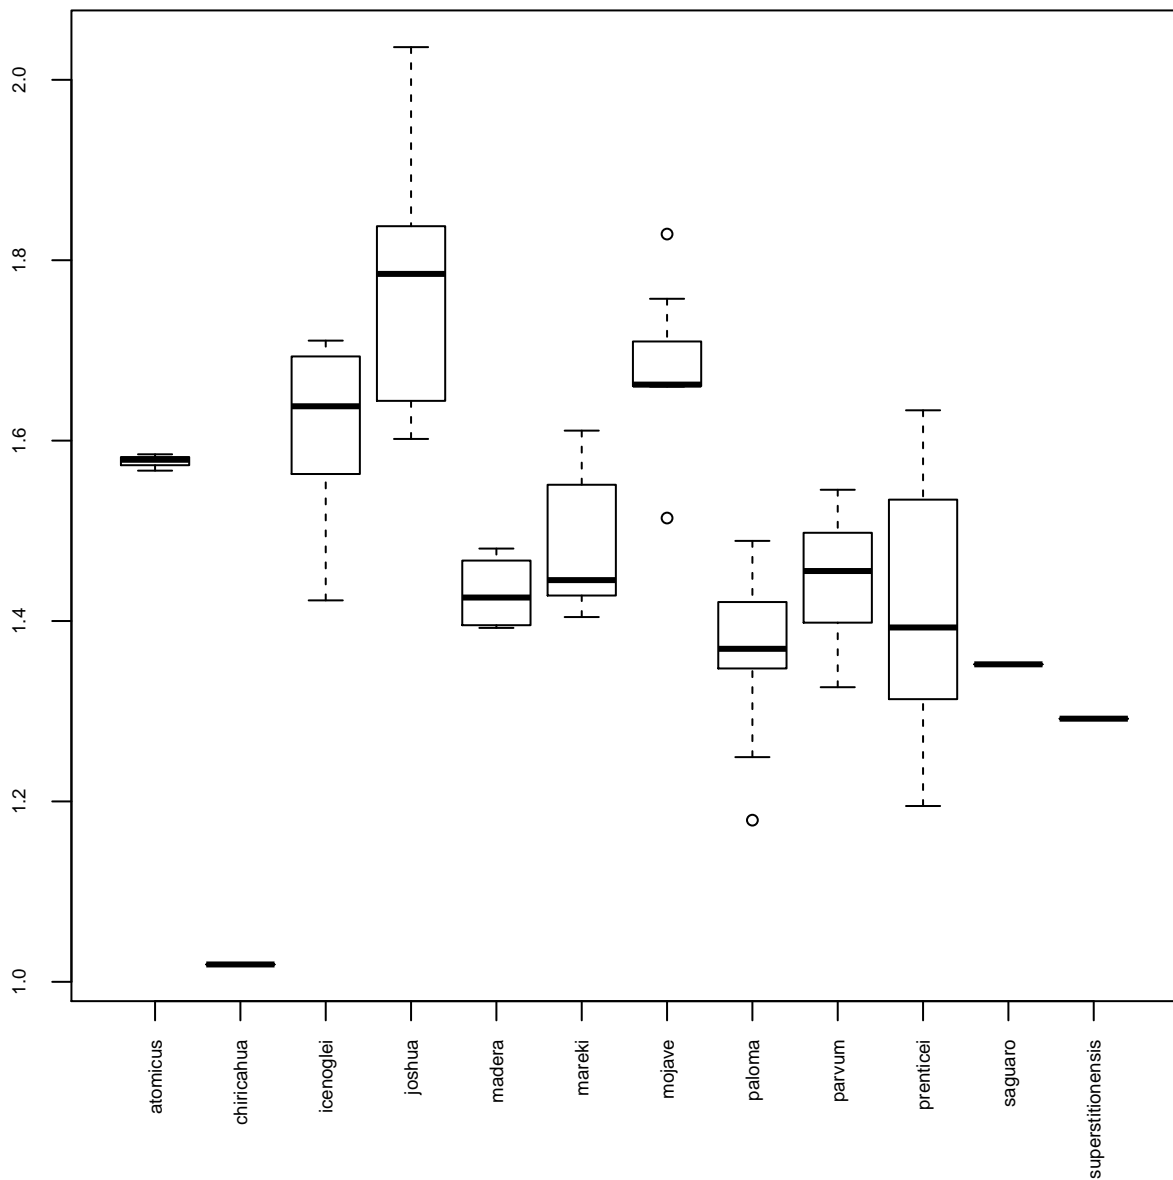

Supplement: Supplementary file 1187

## Femur 3/Tibia 4 Length ratio – males

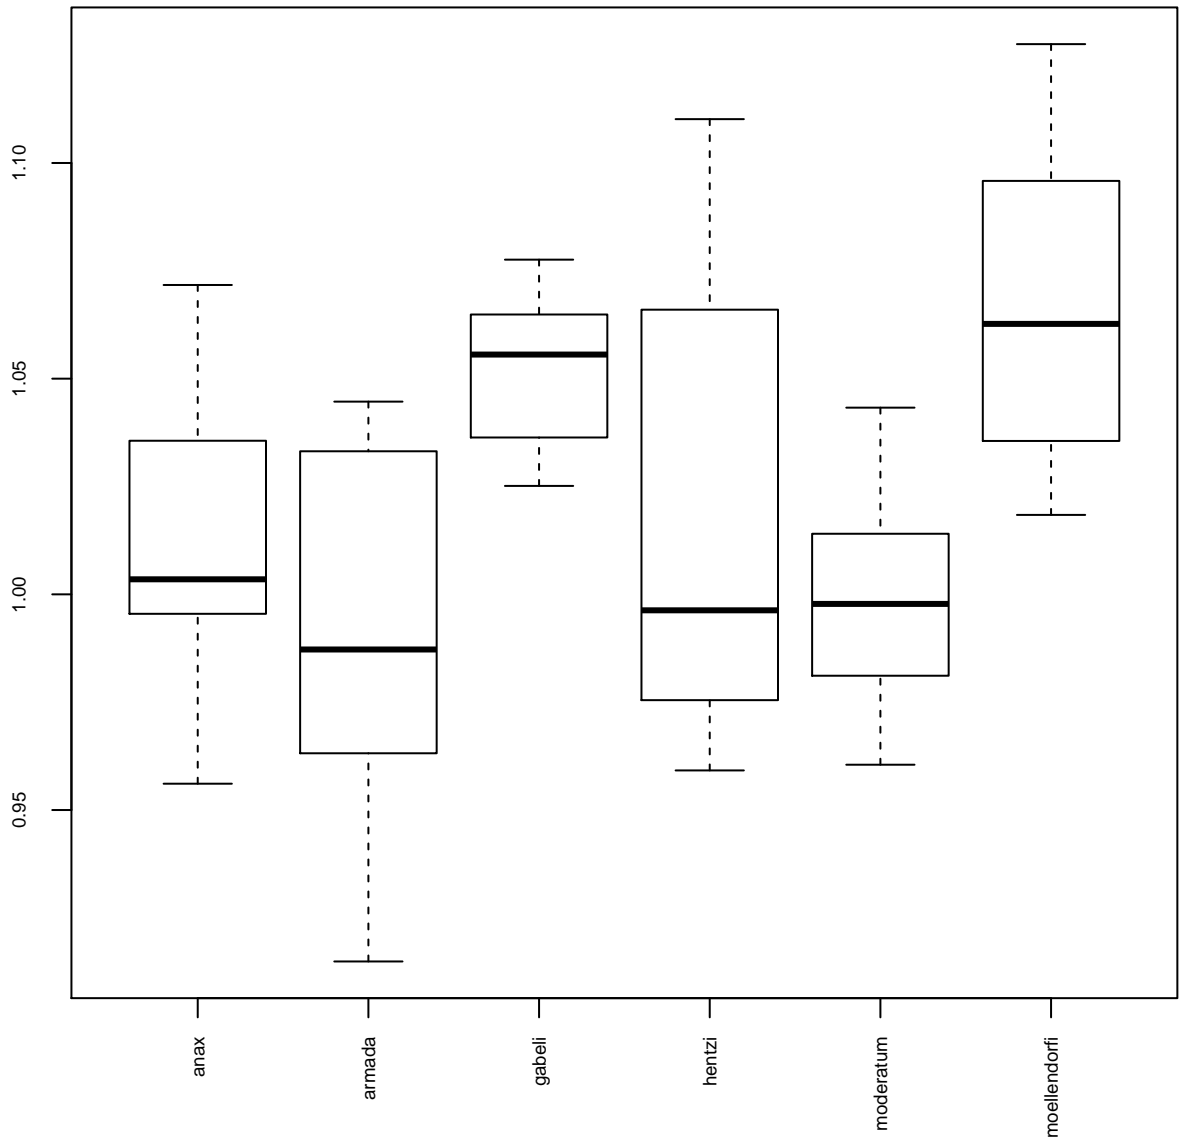

Supplement: Supplementary file 1188

## Tibia 1/Patella 4 Length ratio – males

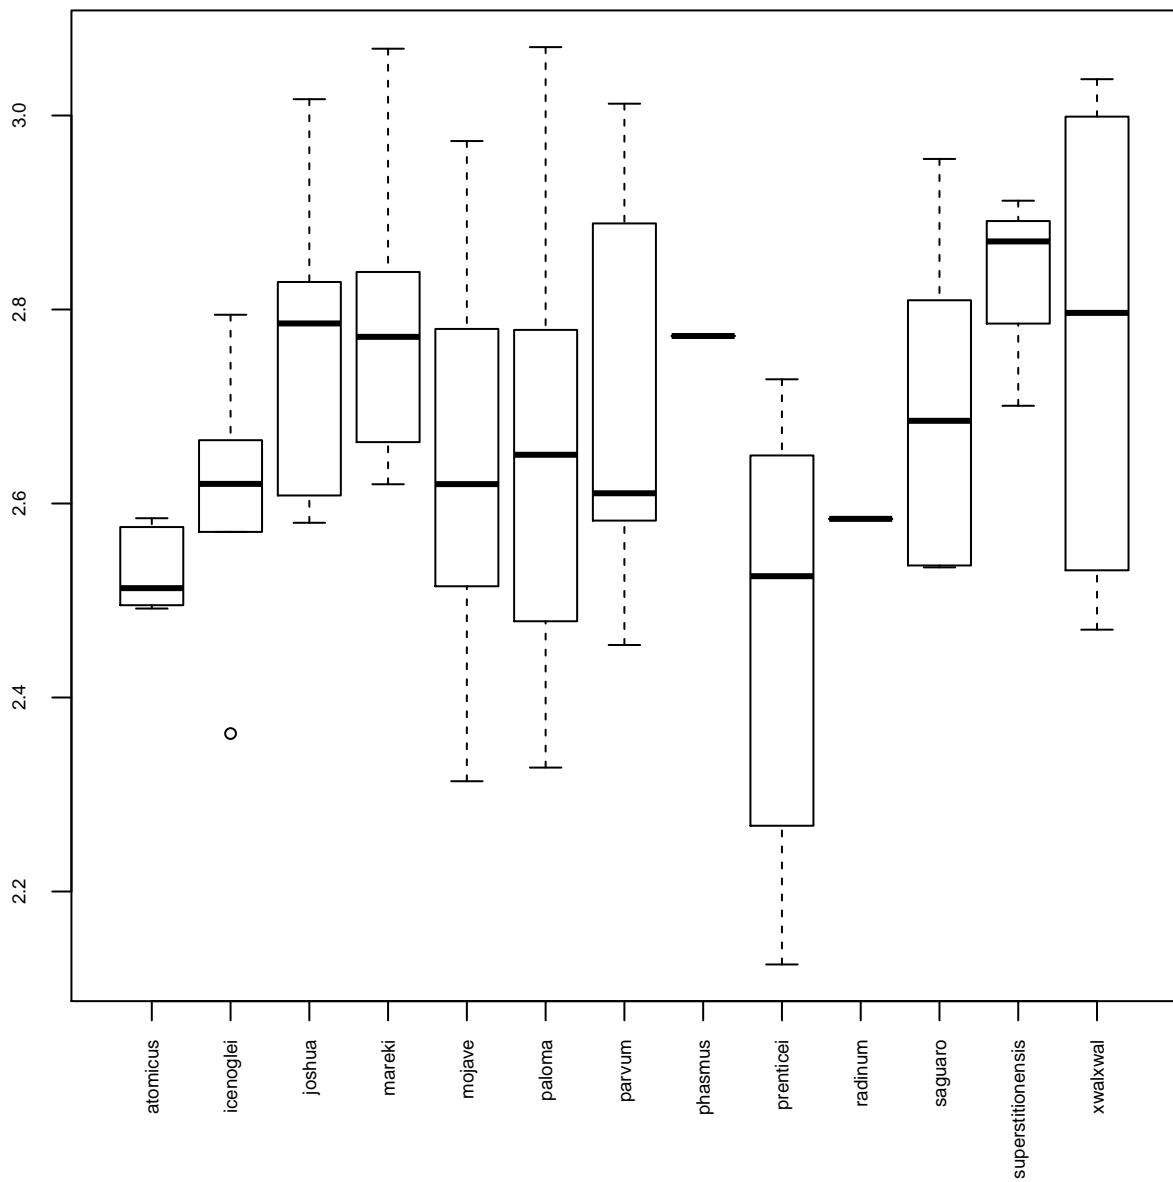

Supplement: Supplementary file 1189

# Patella 3/Tibia 4 Length ratio – males

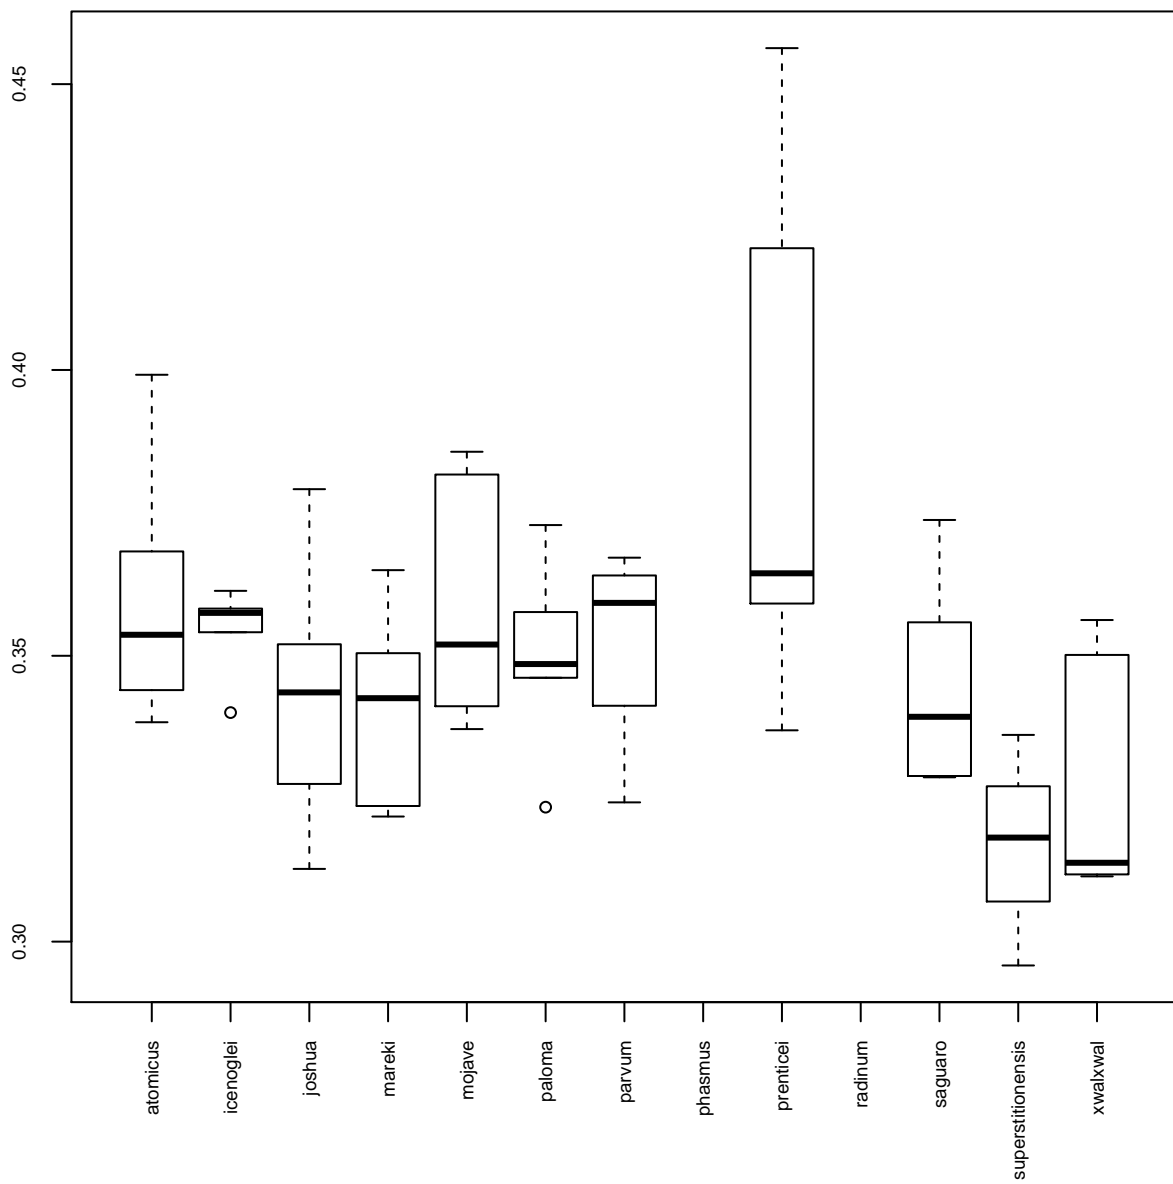

Supplement: Supplementary file 1190

# Metatarsus 1/Tibia 3 Length ratio – males

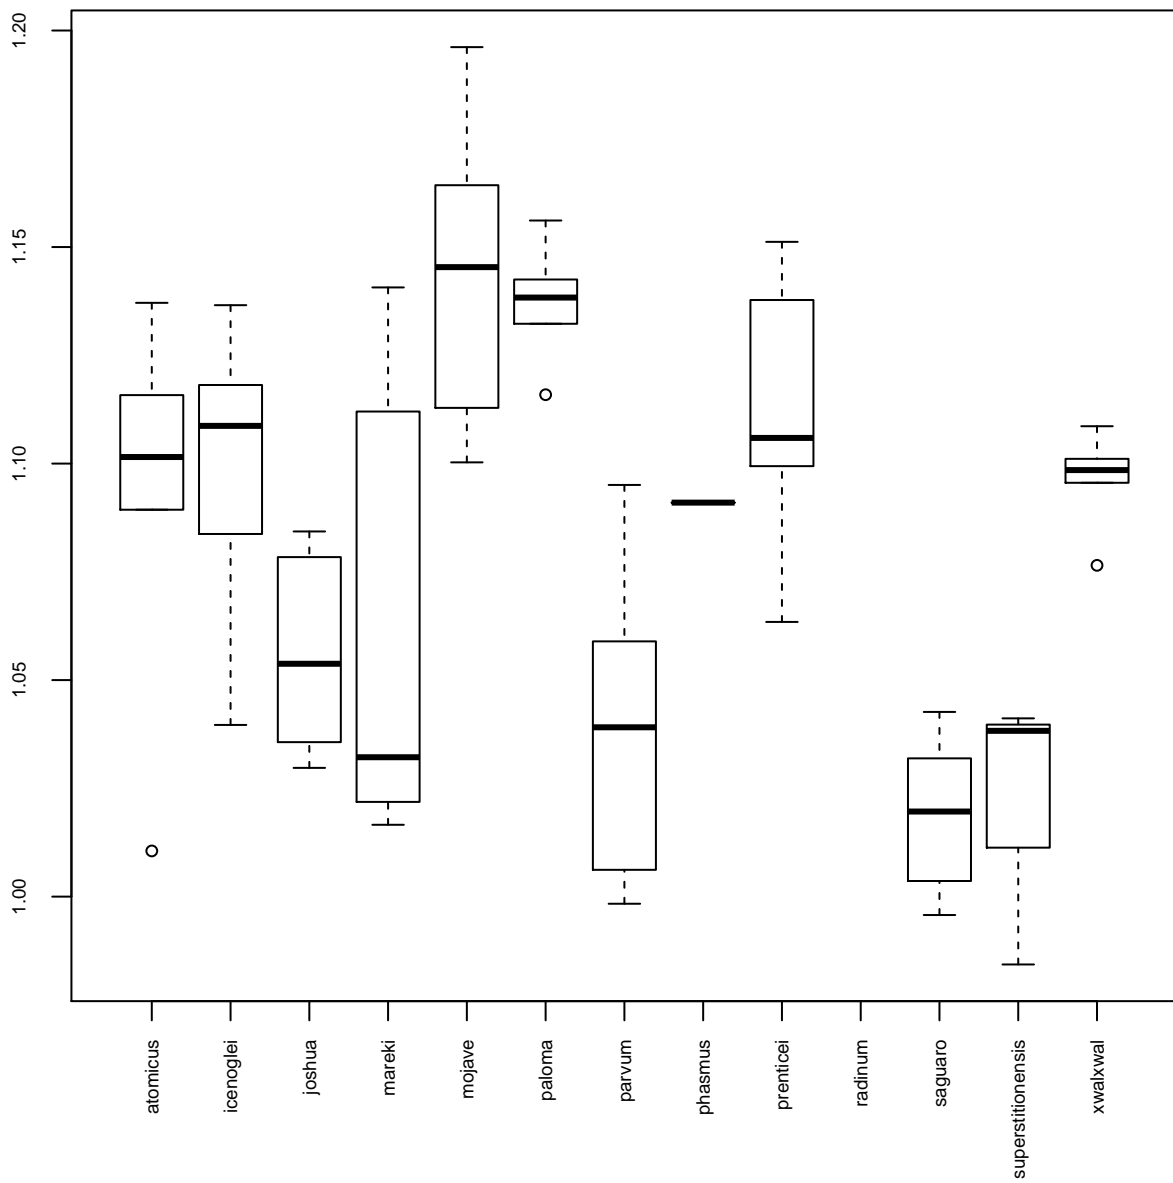

Supplement: Supplementary file 1191

## Patella 3/Tarsus 3 ratio – males

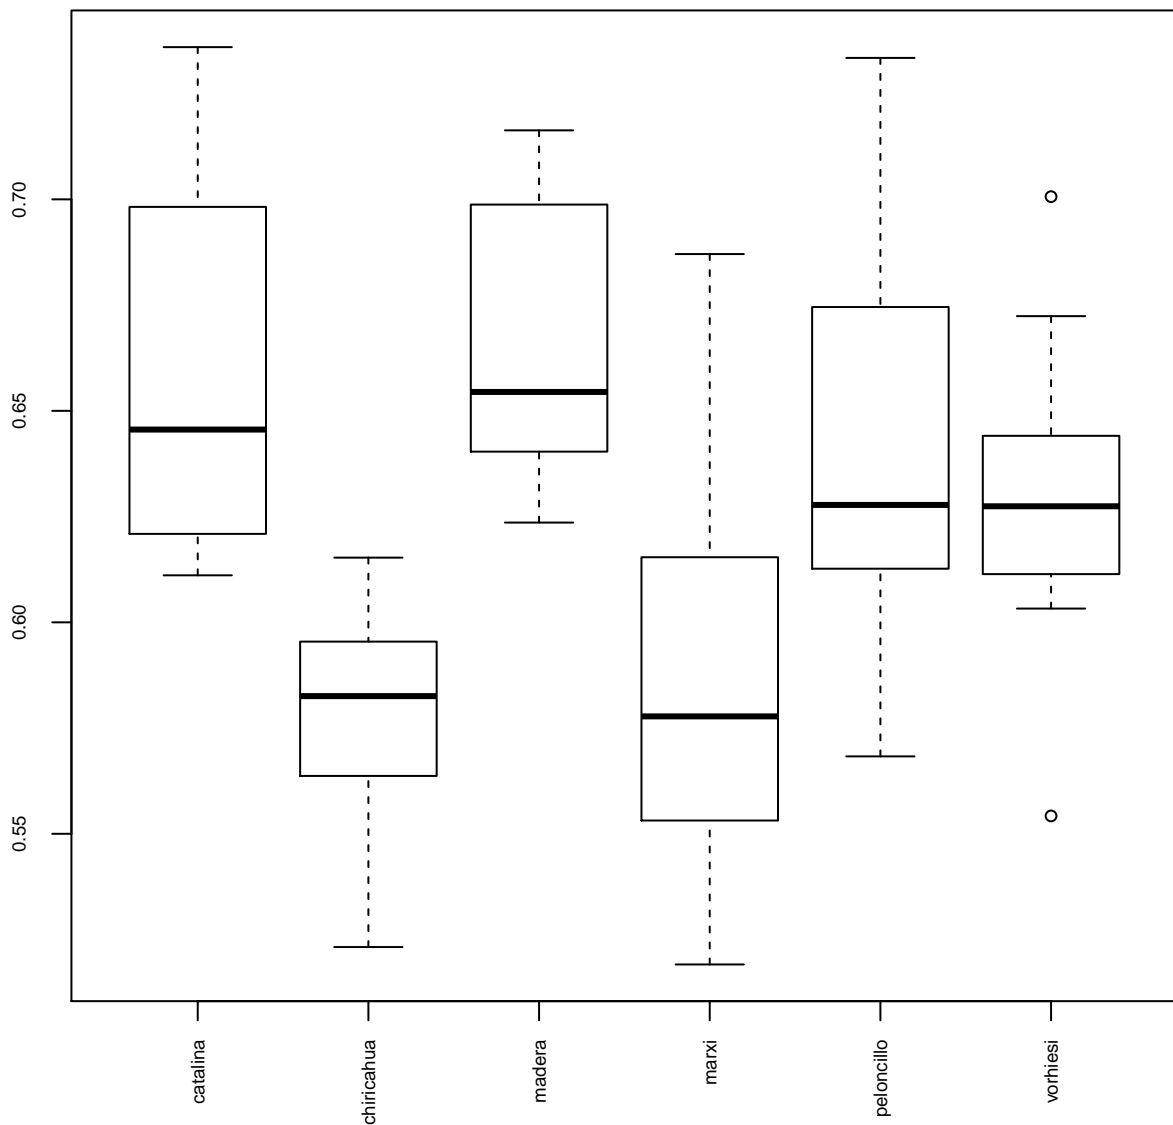

Supplement: Supplementary file 1192

## Femur 3/Tarsus 3 ratio – males

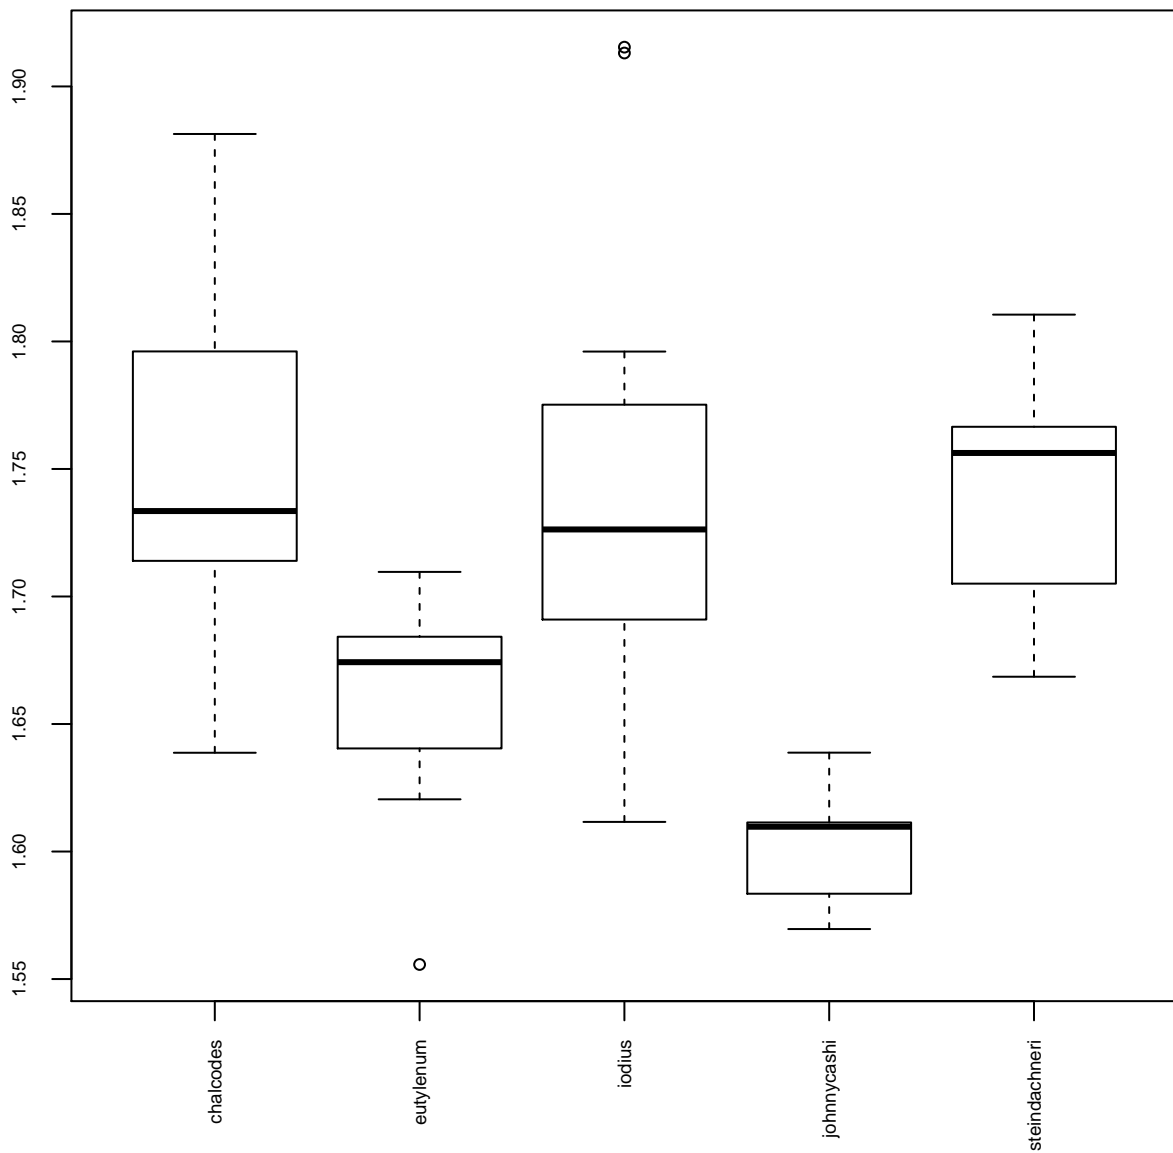

Supplement: Supplementary file 1193

## Tarsus 1/Tibia 3 Length ratio – females

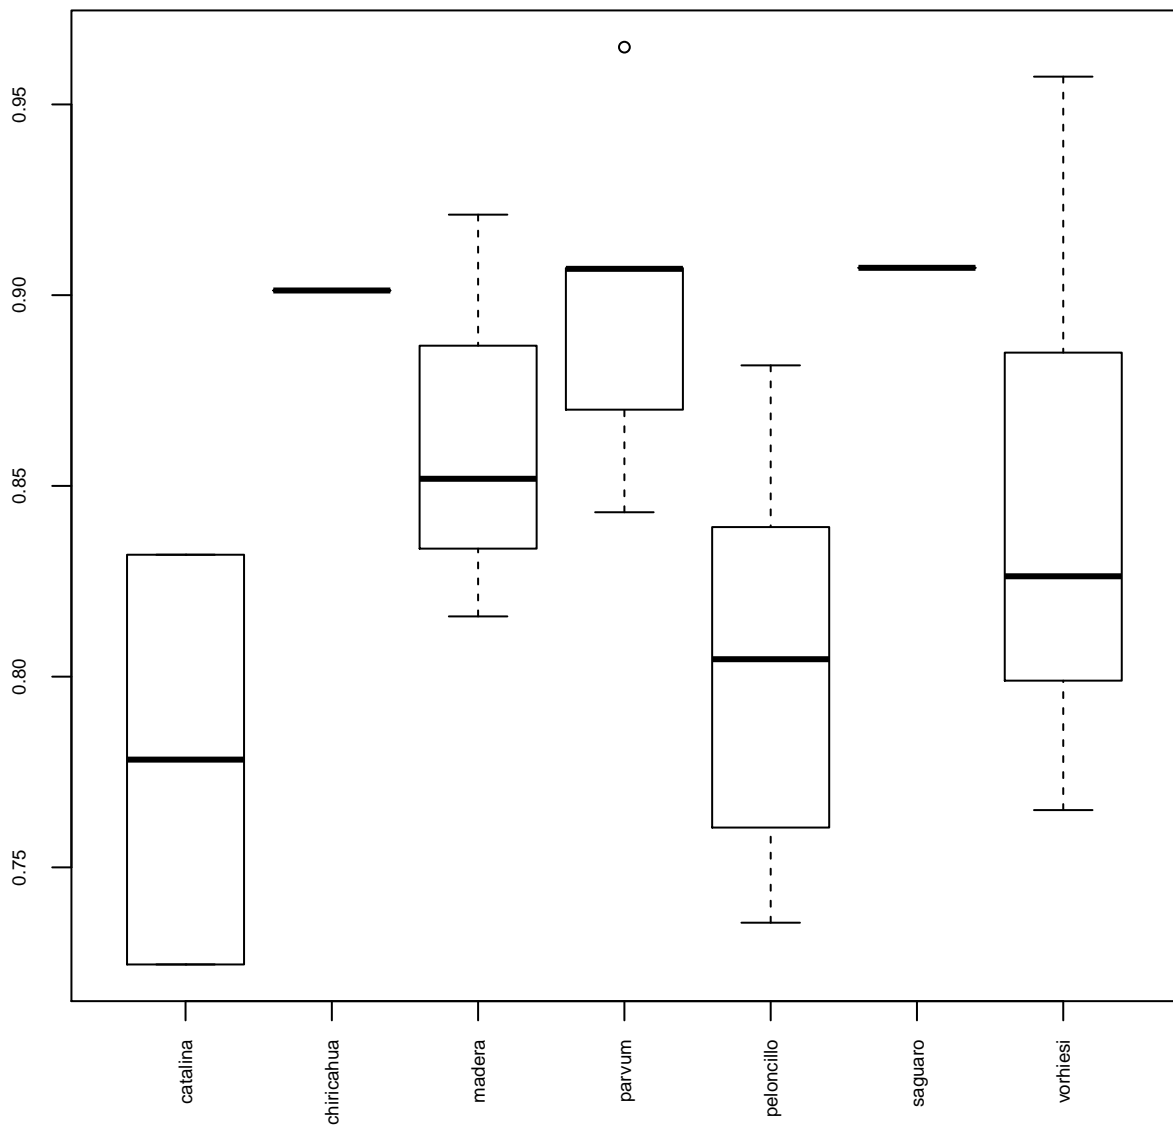

Supplement: Supplementary file 1194

## Carapace Length/Patella 3 ratio – females

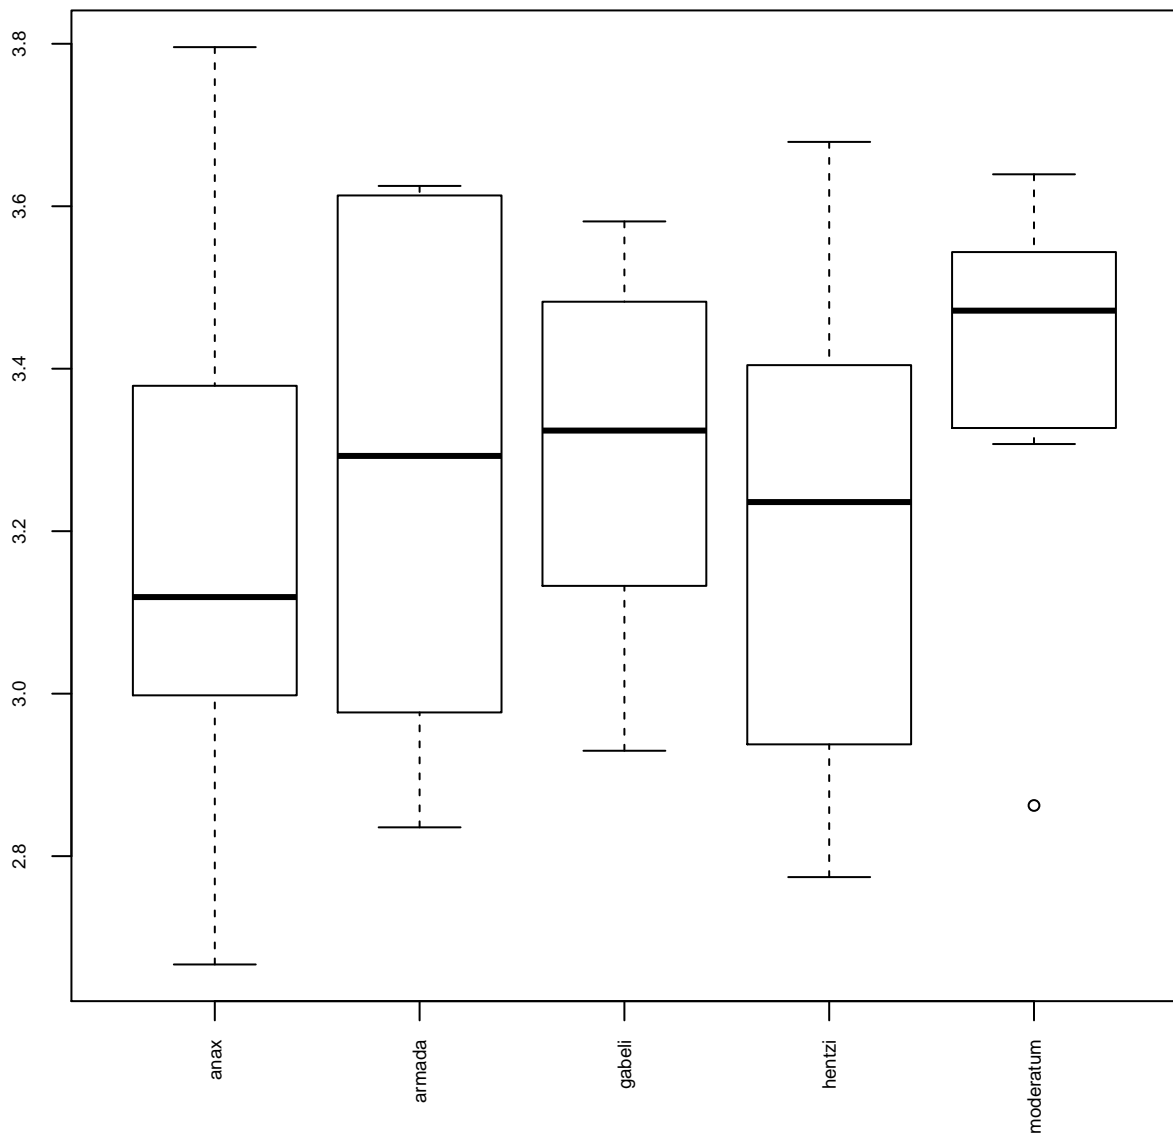

Supplement: Supplementary file 1195

# Femur 3/Patella 3 ratio – females

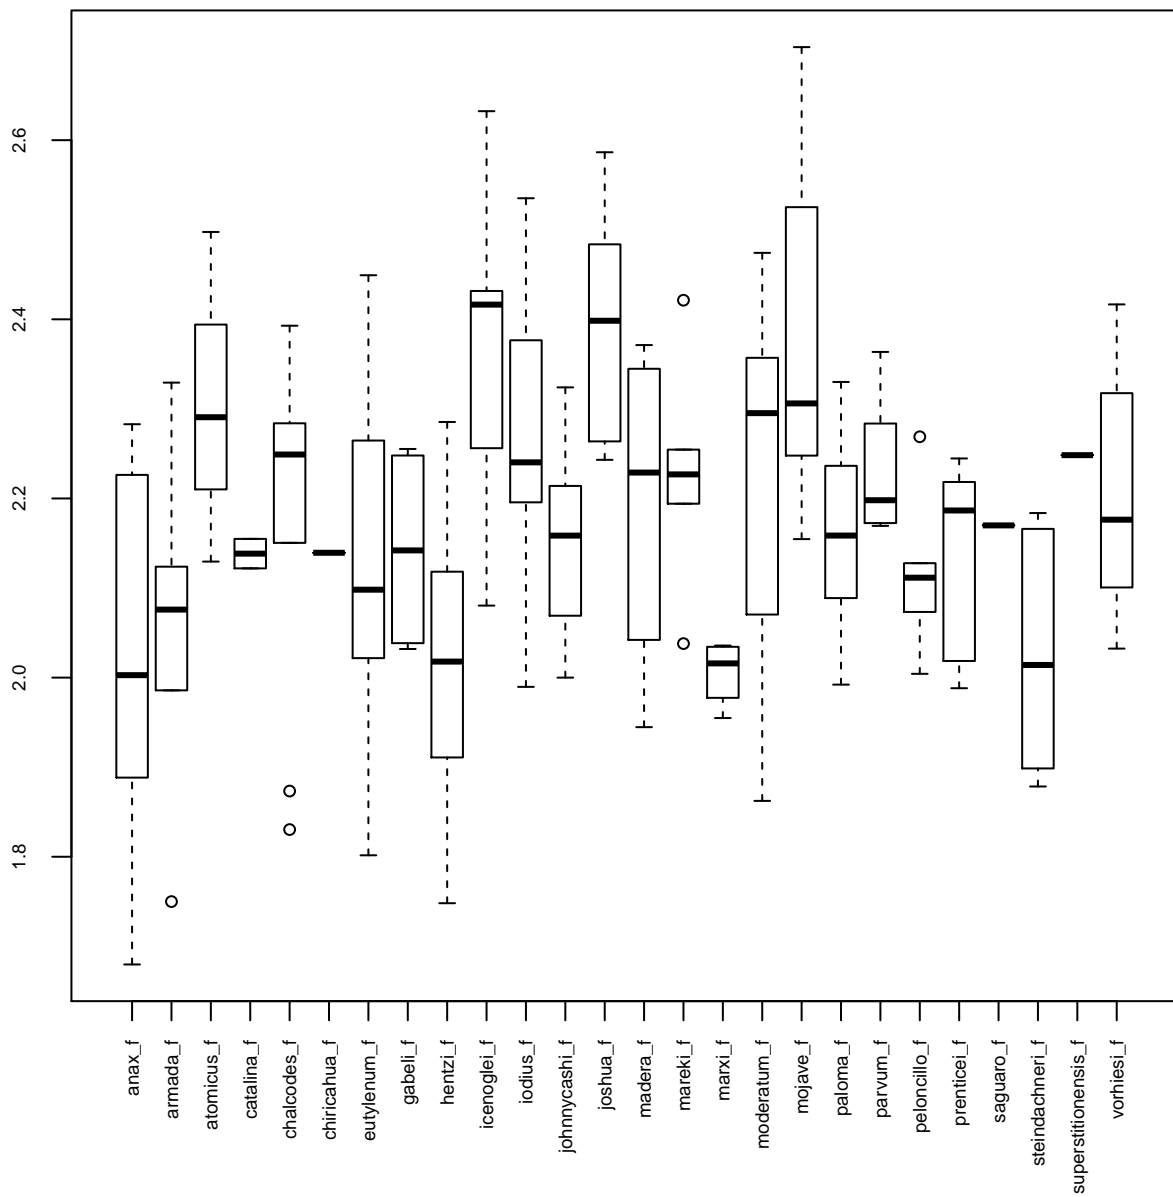

Supplement: Supplementary file 1196

## Palpal Tibia/Metatarsus 1 Length ratio – males

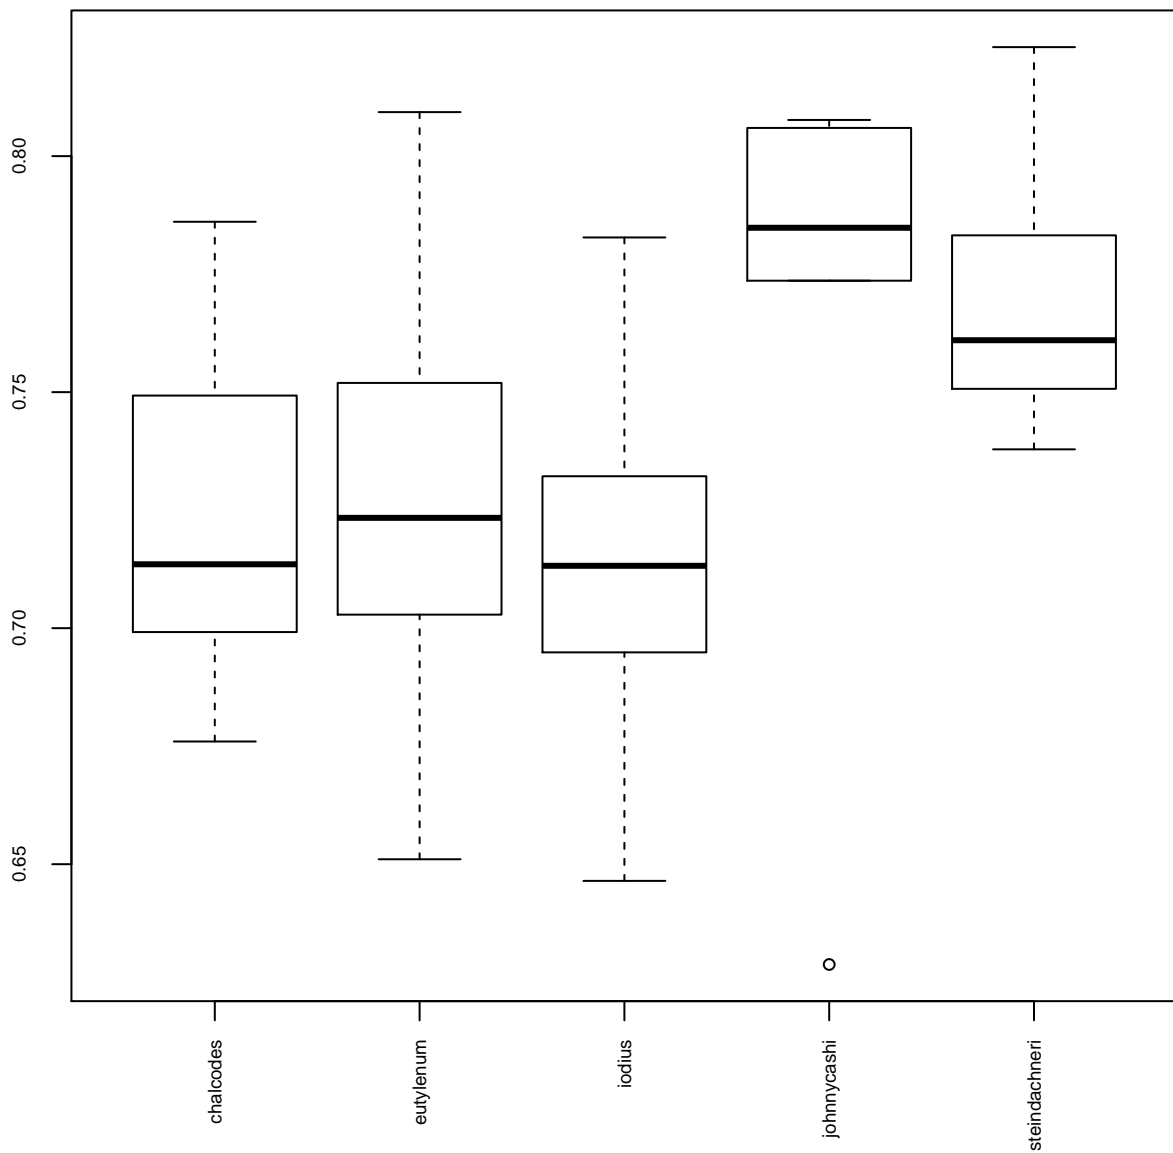

Supplement: Supplementary file 1197

## Palpal Tibia/Tarsus 1 Length ratio – males

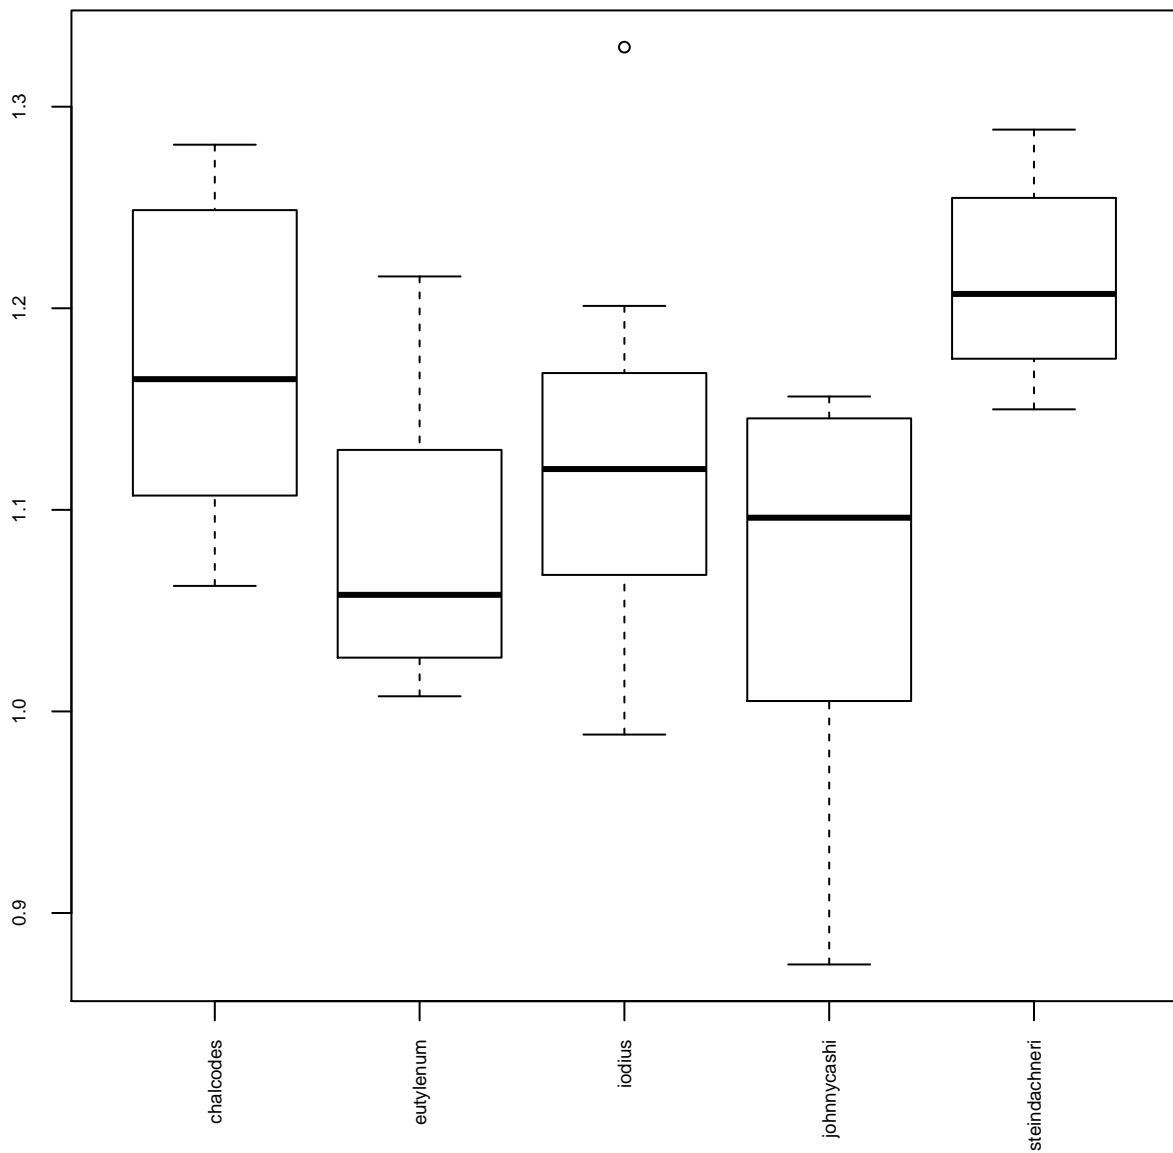

Supplement: Supplementary file 1198

## Carapace Width – females

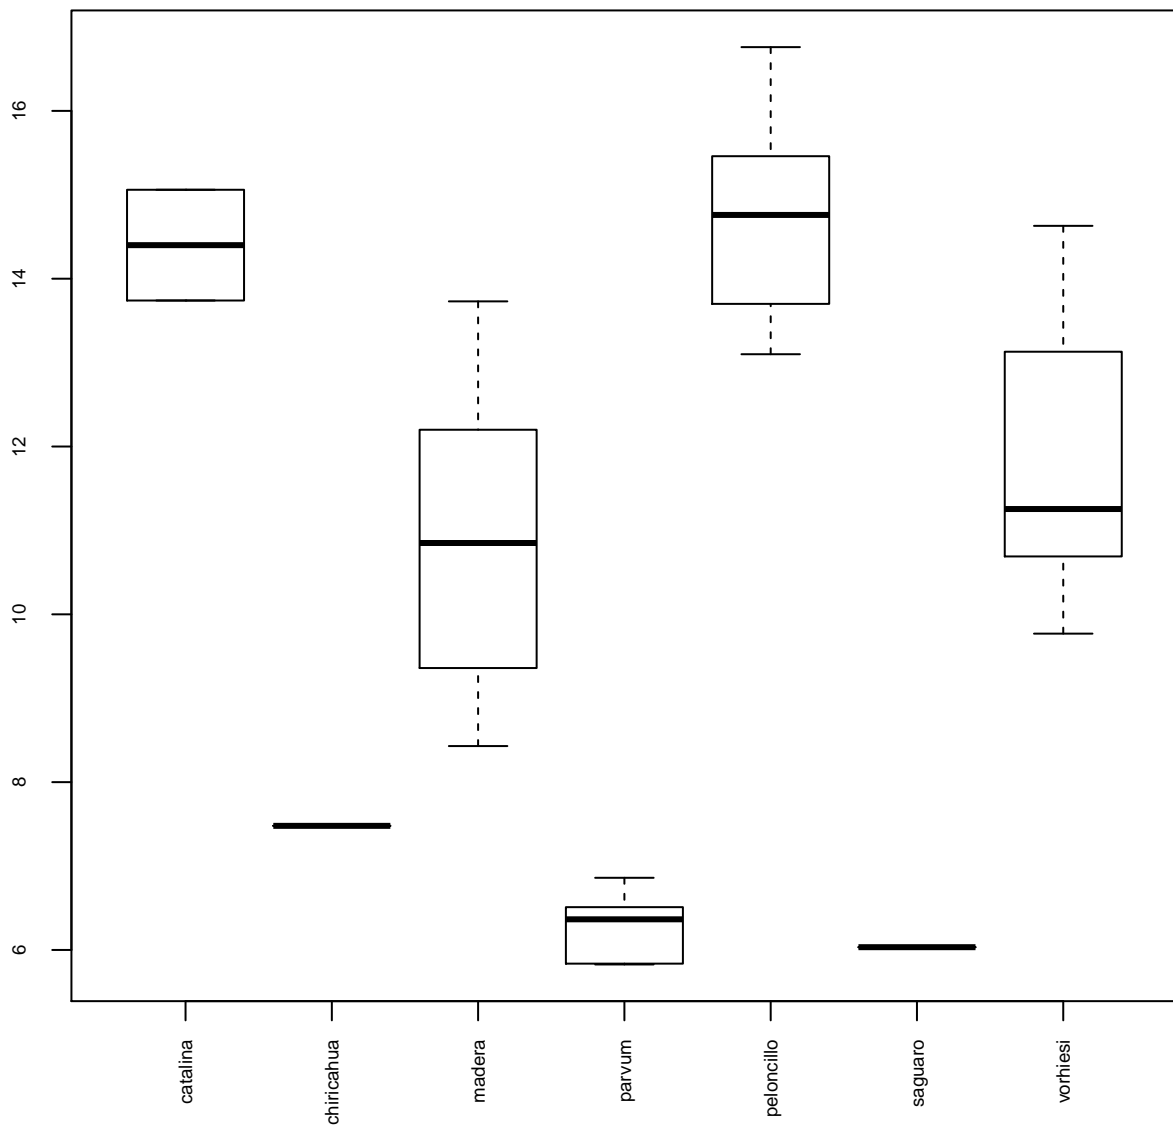

Supplement: Supplementary file 1199

## Metatarsus 1/Metatarsus 4 ratio – females

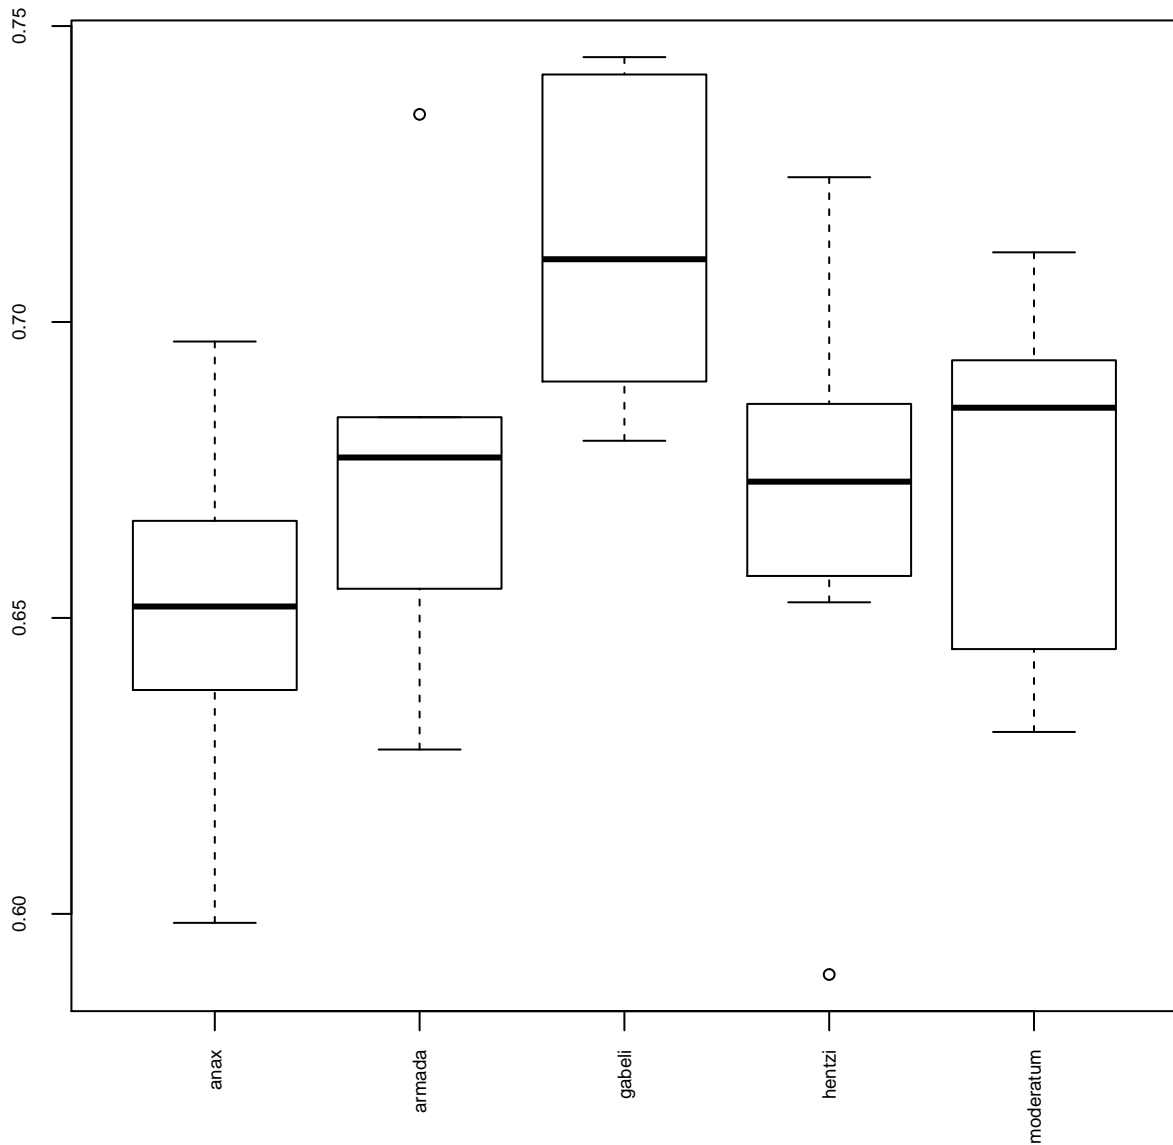

Supplement: Supplementary file 1200
