# Supplementary material (part 13 of 15)
Source: publisher site journal article supplement (http://zookeys.pensoft.net/article/6264/download/suppl/32/)

# Femur 1/Tibia 3 ratio – females

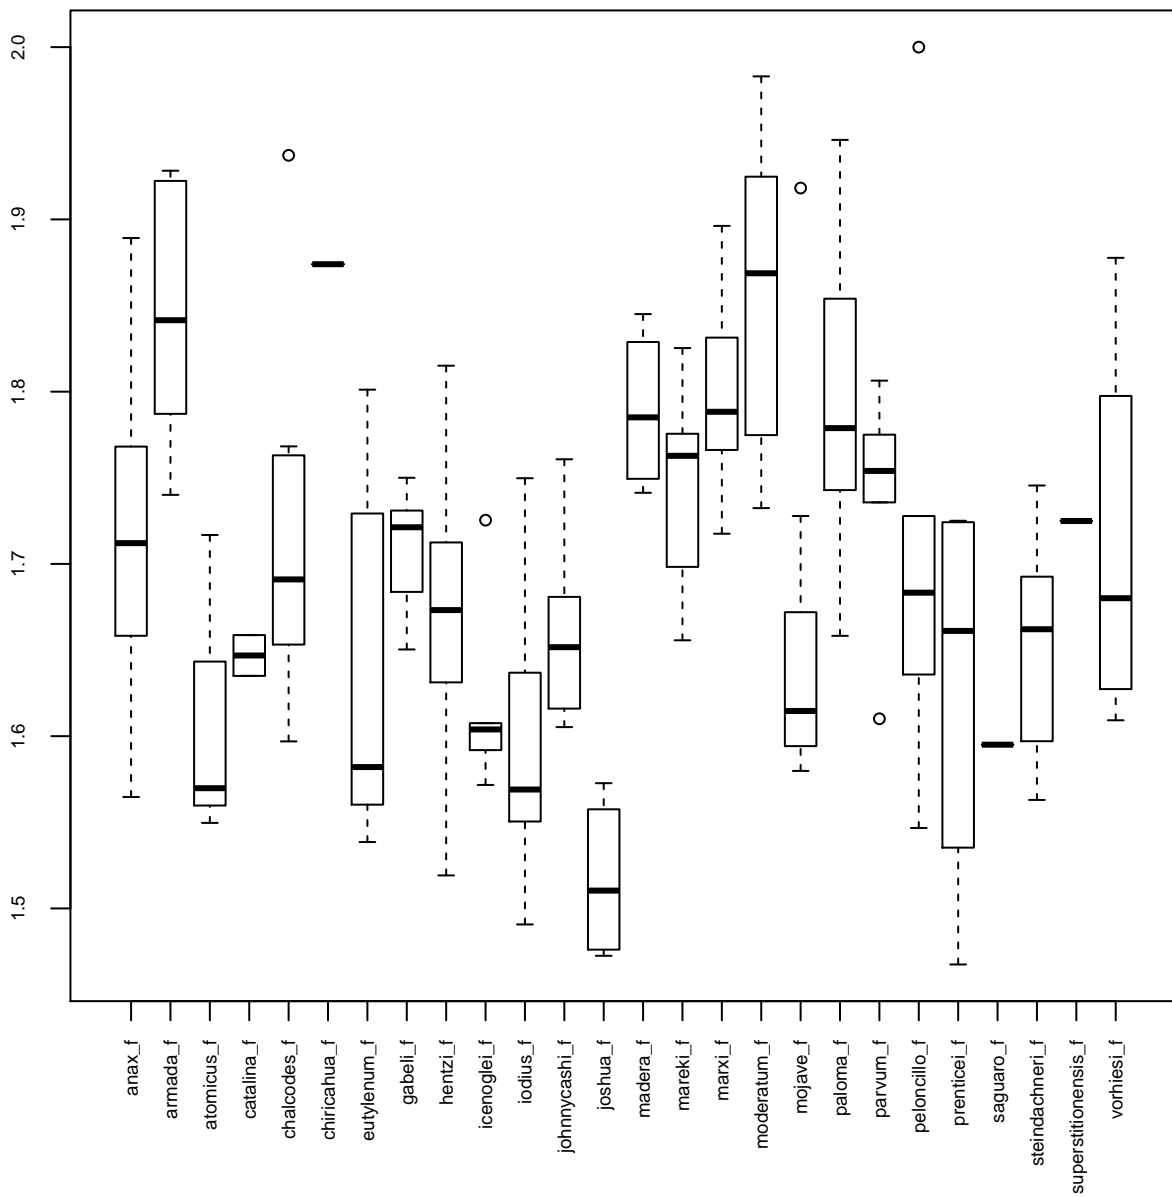

Supplement: Supplementary file 1201

## Leg 4 Scopulation ratio – females

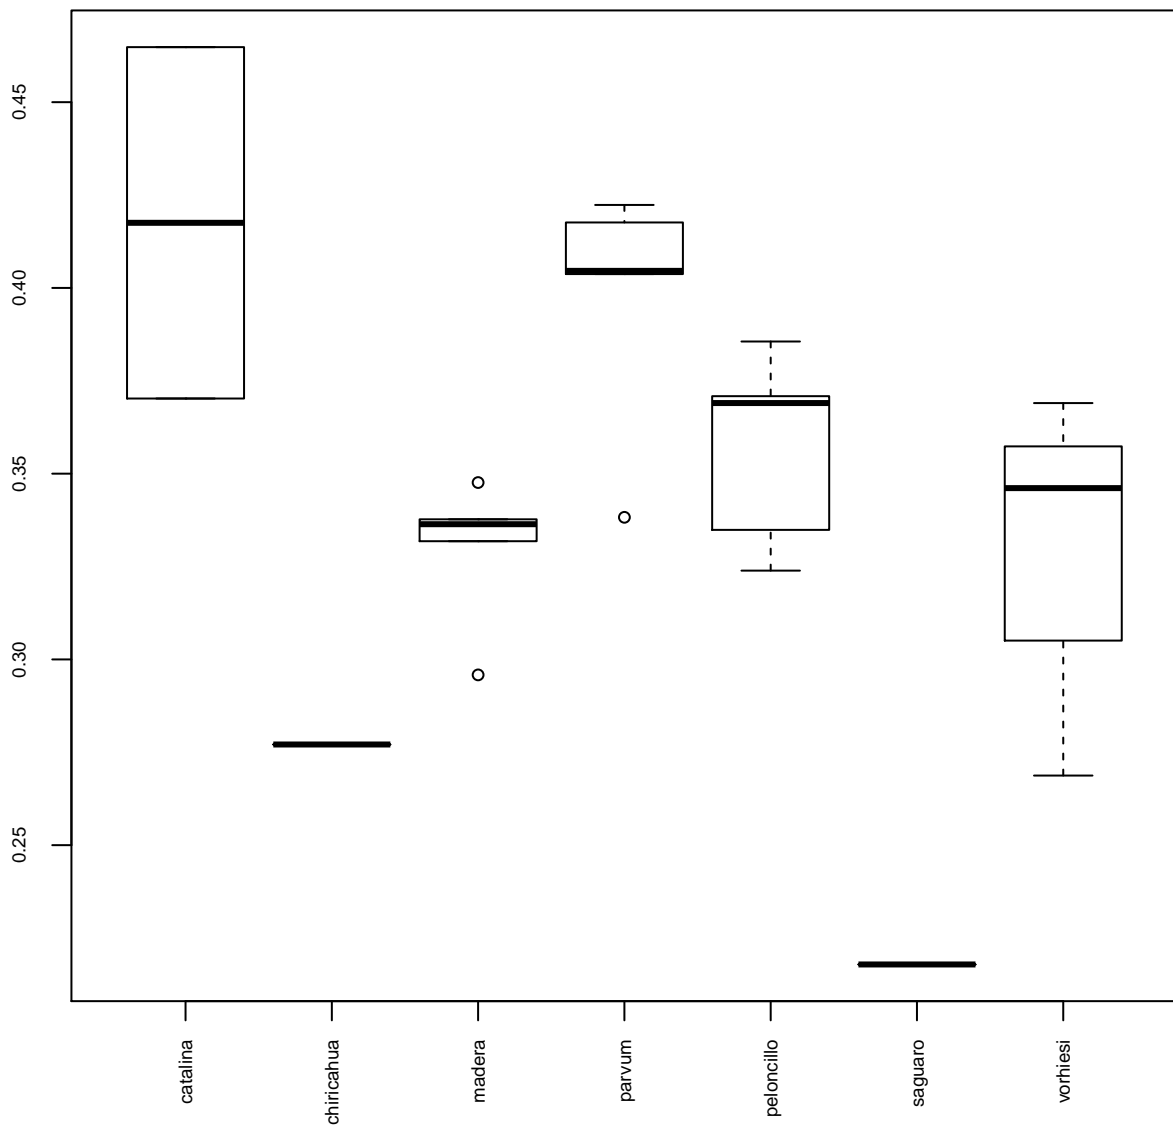

Supplement: Supplementary file 1202

## Femur 3/Tarsus 4 Length ratio – females

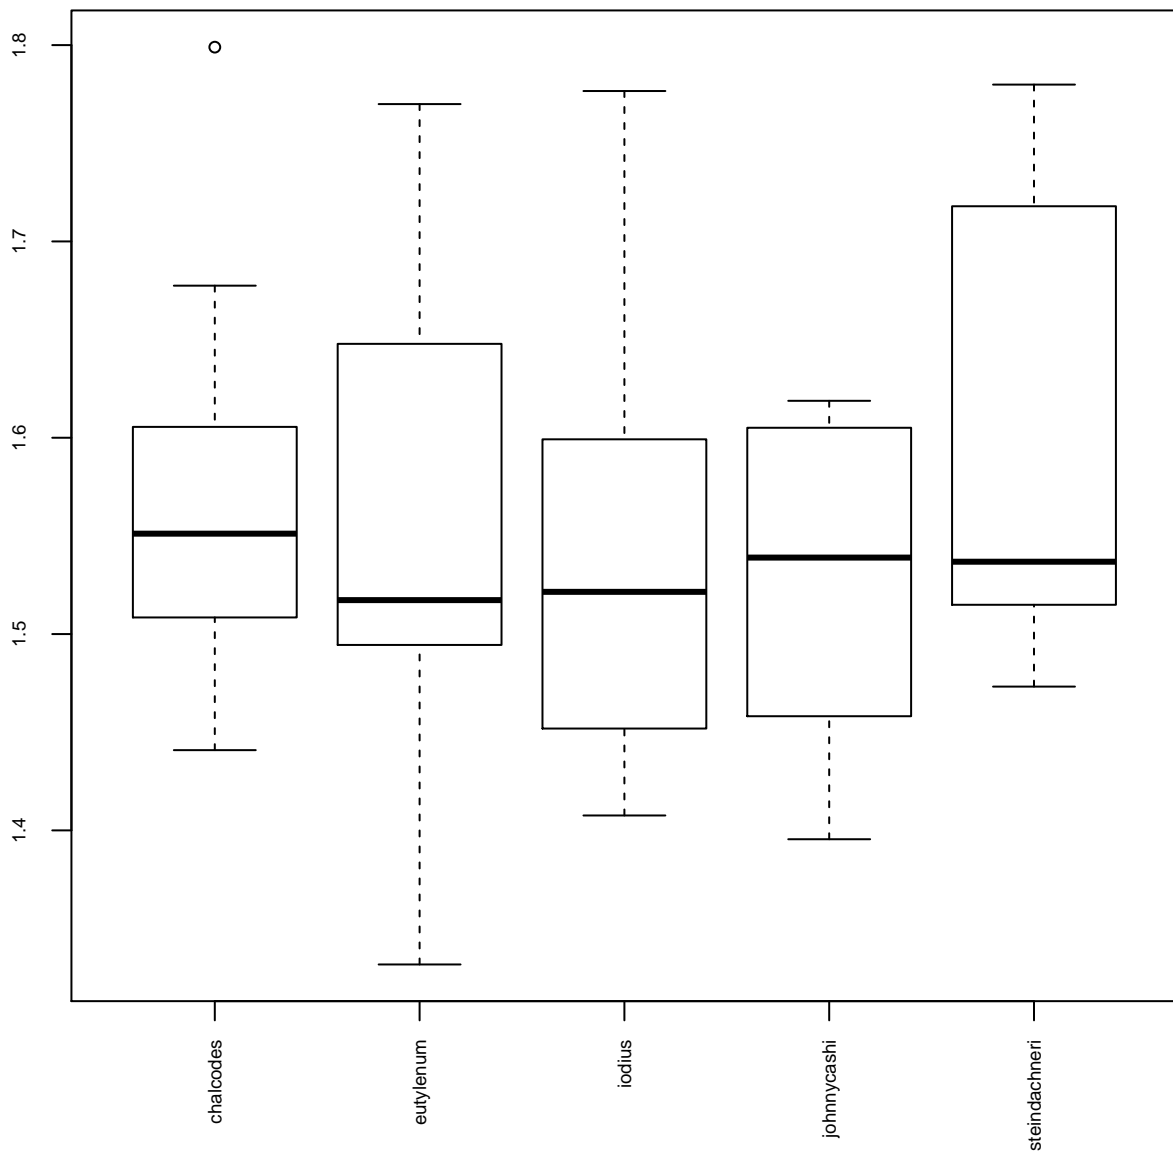

Supplement: Supplementary file 1203

## Metatarsus 3/Metatarsus 4 ratio – males

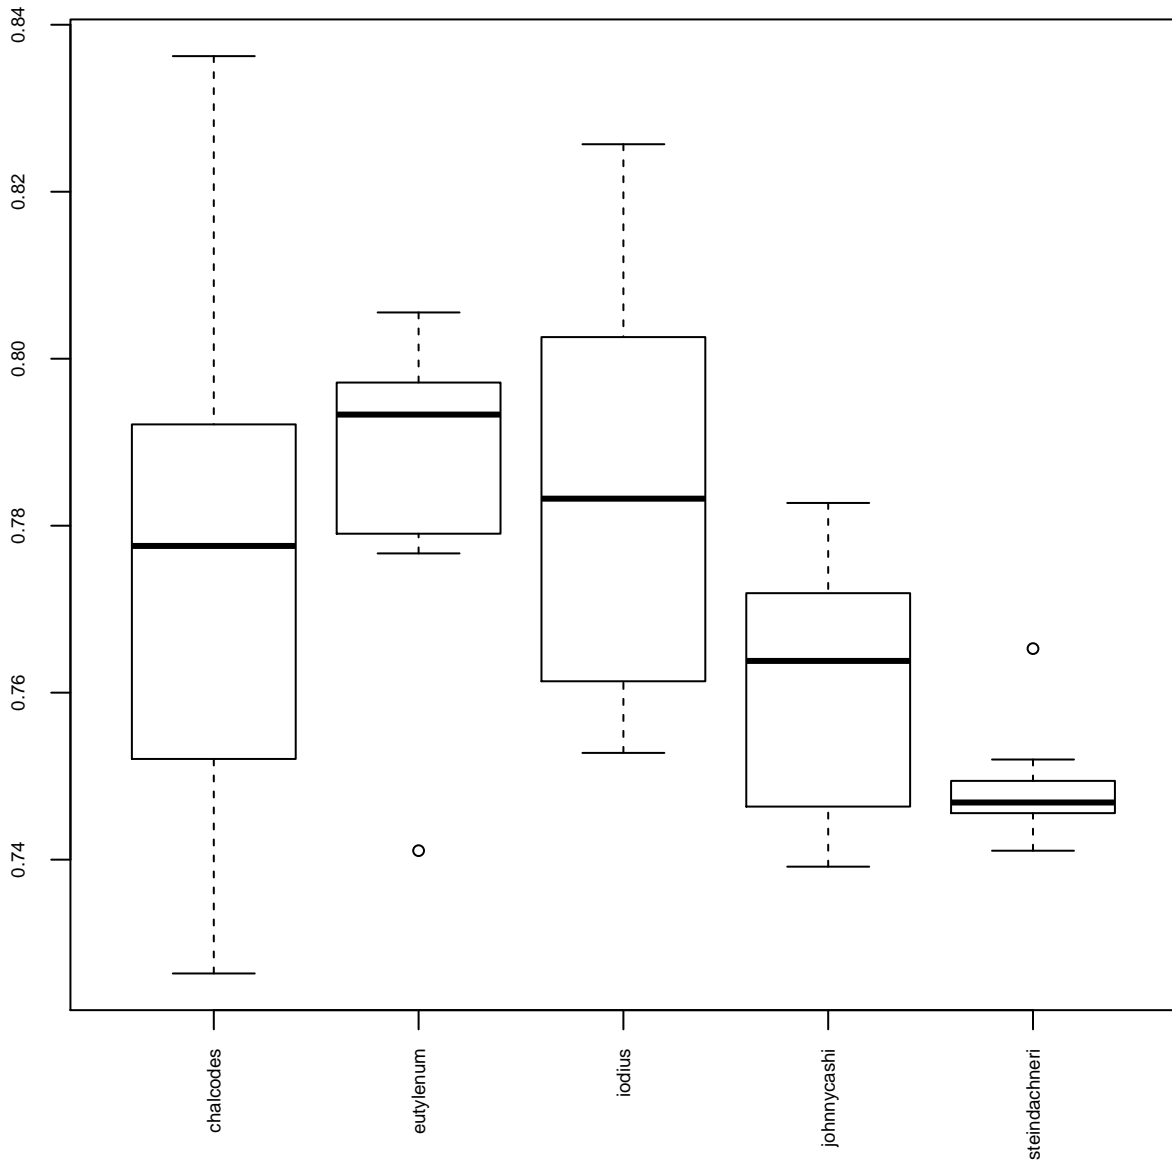

Supplement: Supplementary file 1204

## Tarsus 1/Metatarsus 3 Length ratio – females

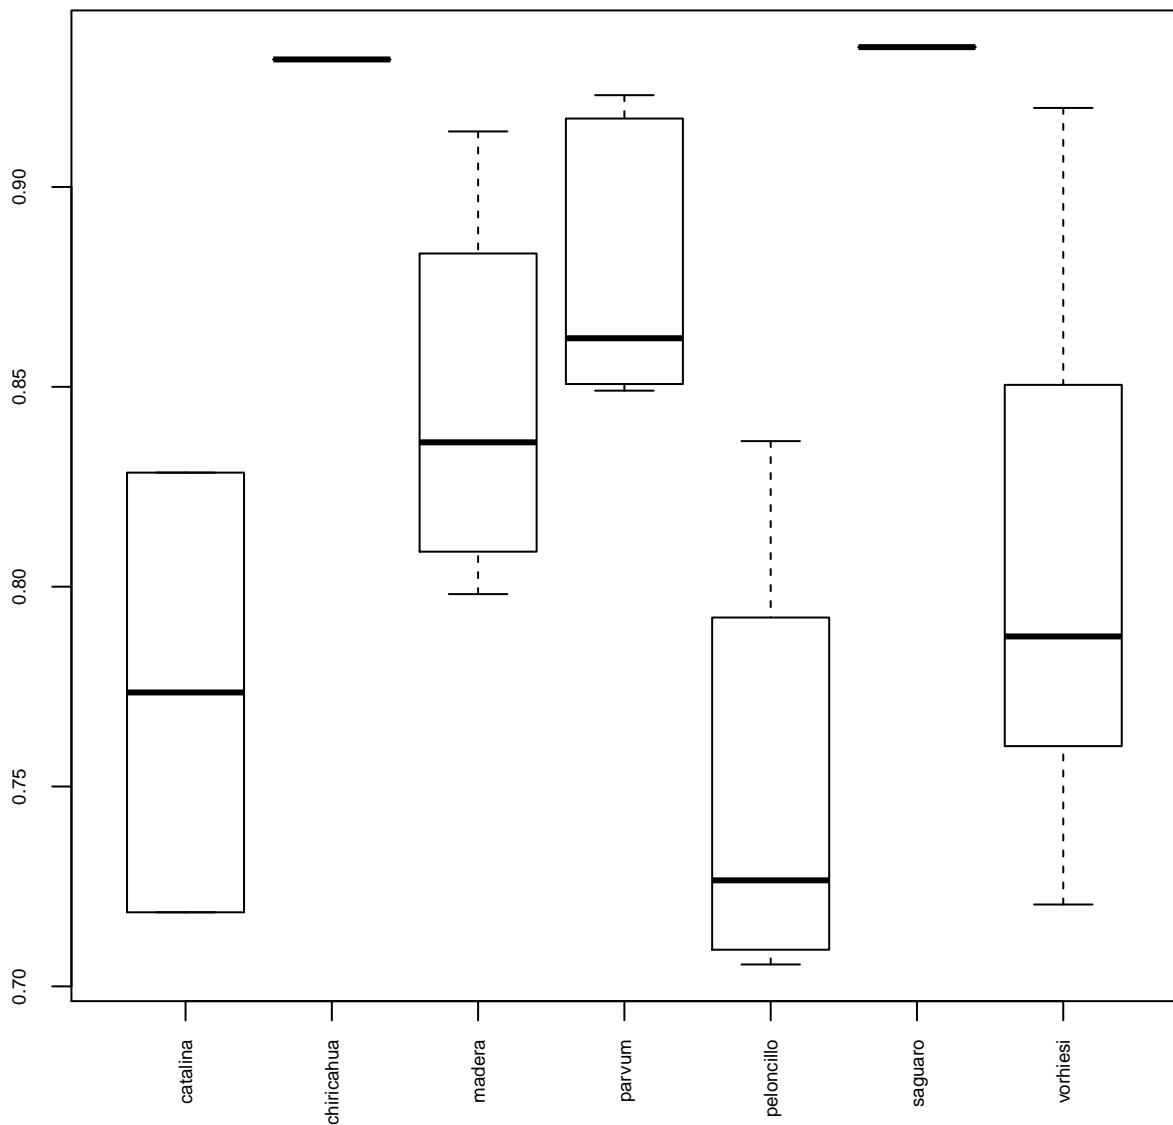

Supplement: Supplementary file 1205

## Patella 1/Metatarsus 1 ratio – females

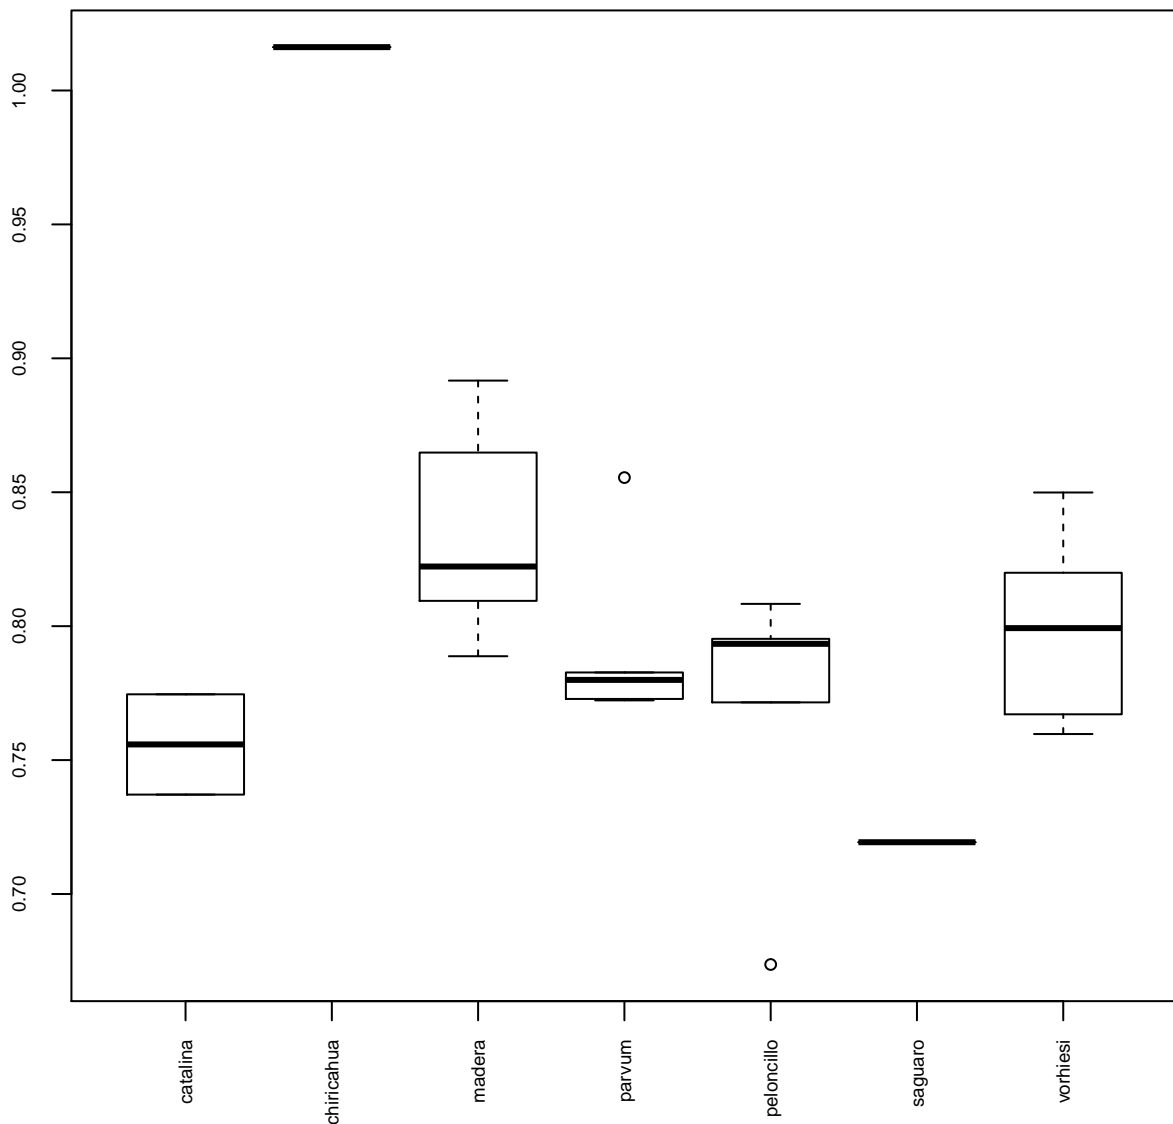

Supplement: Supplementary file 1206

## Carapace Length/Tibia 3 ratio – females

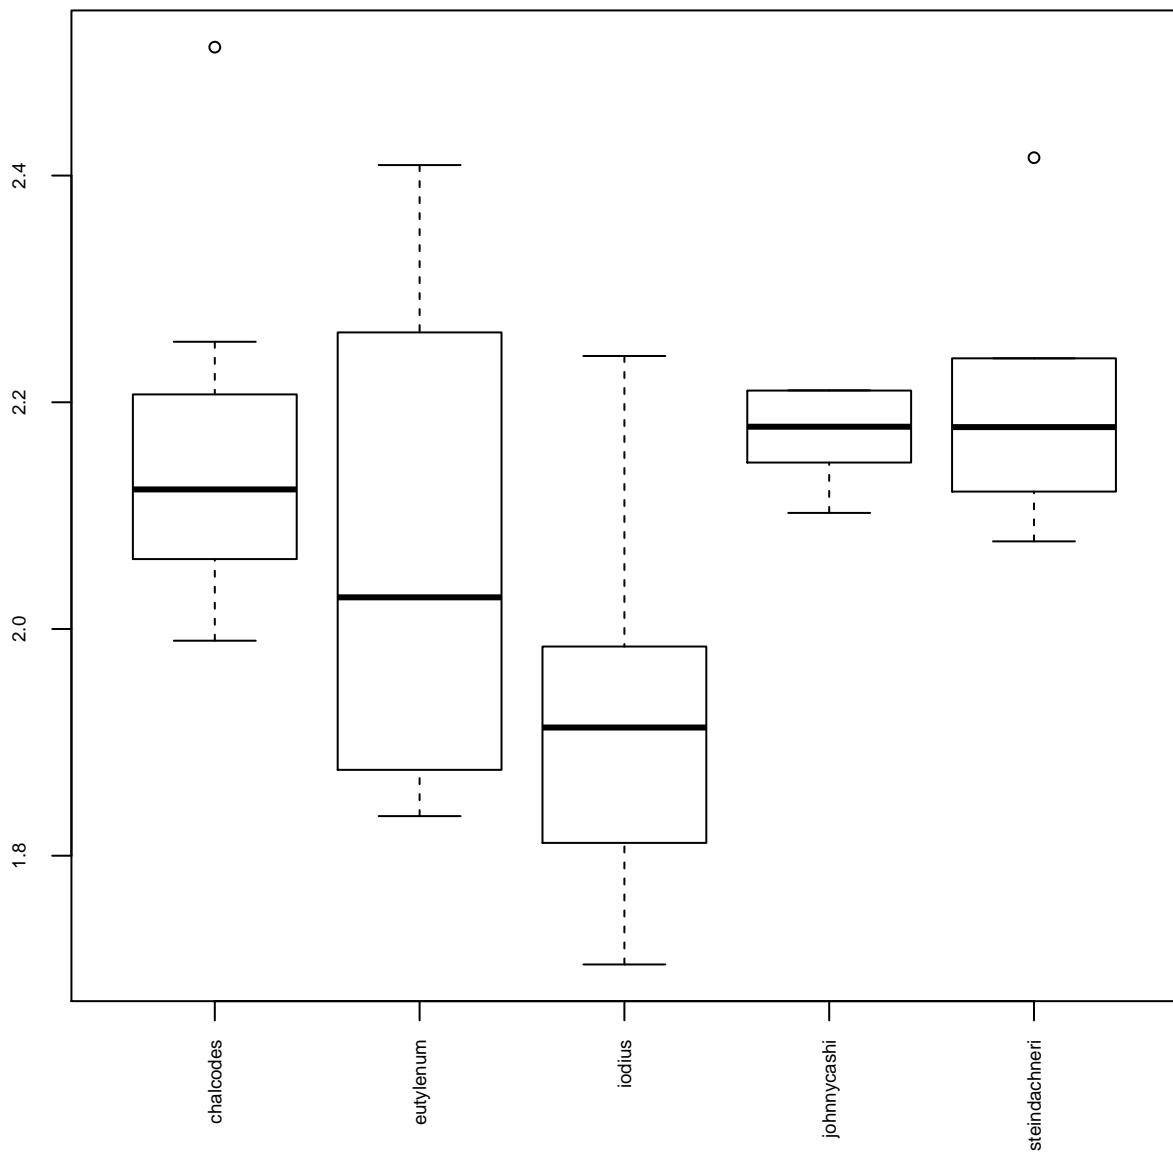

Supplement: Supplementary file 1207

# Carapace Length/Tibia 1 ratio – males

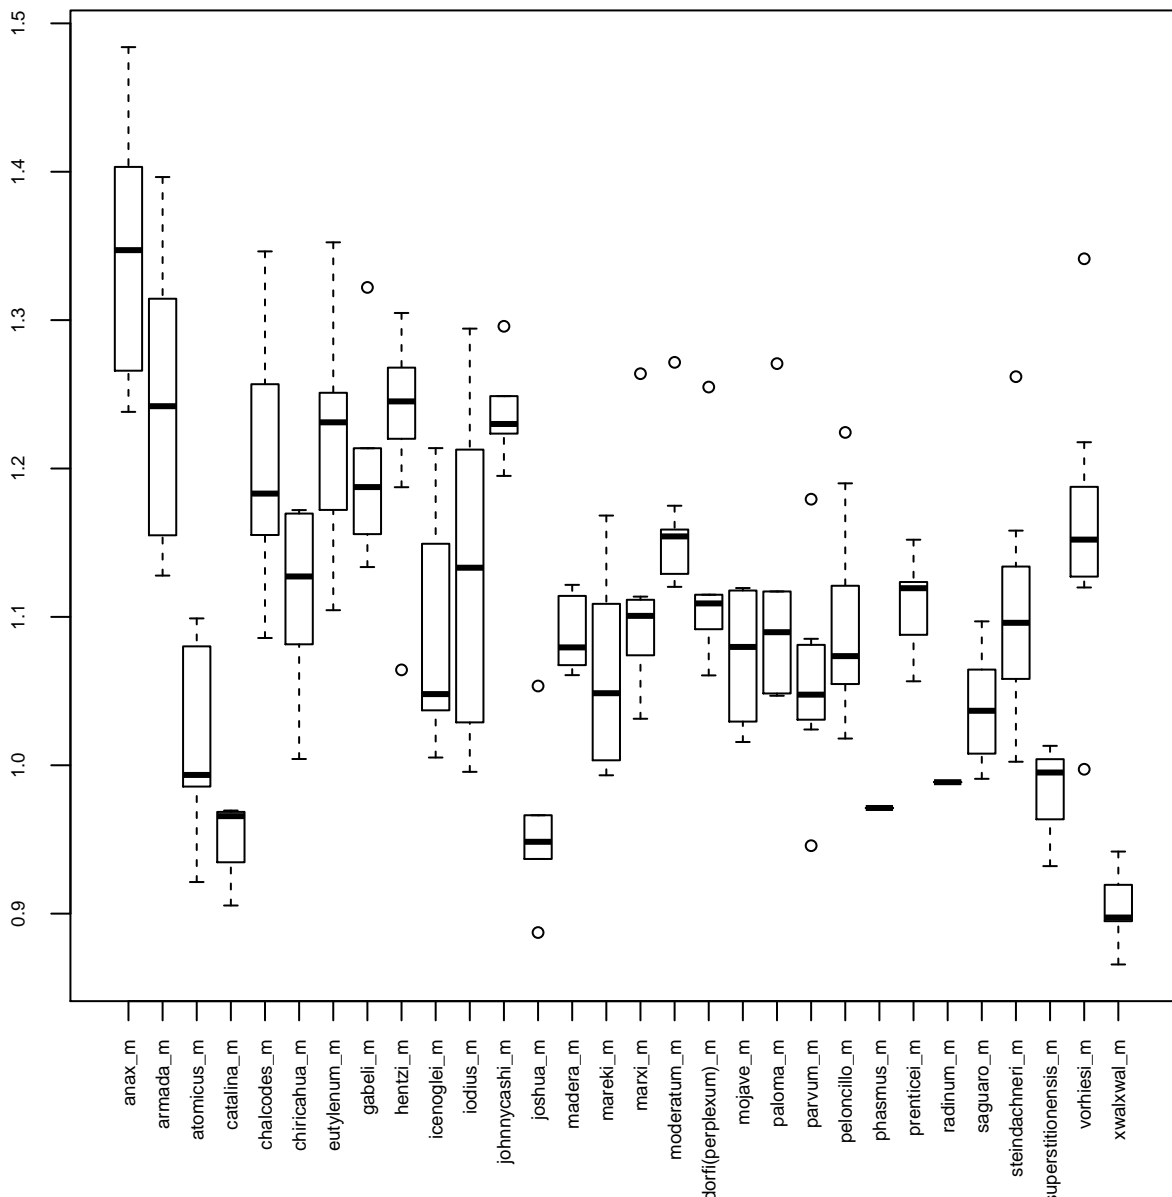

Supplement: Supplementary file 1208

## Tarsus 1/Tarsus 3 ratio – females

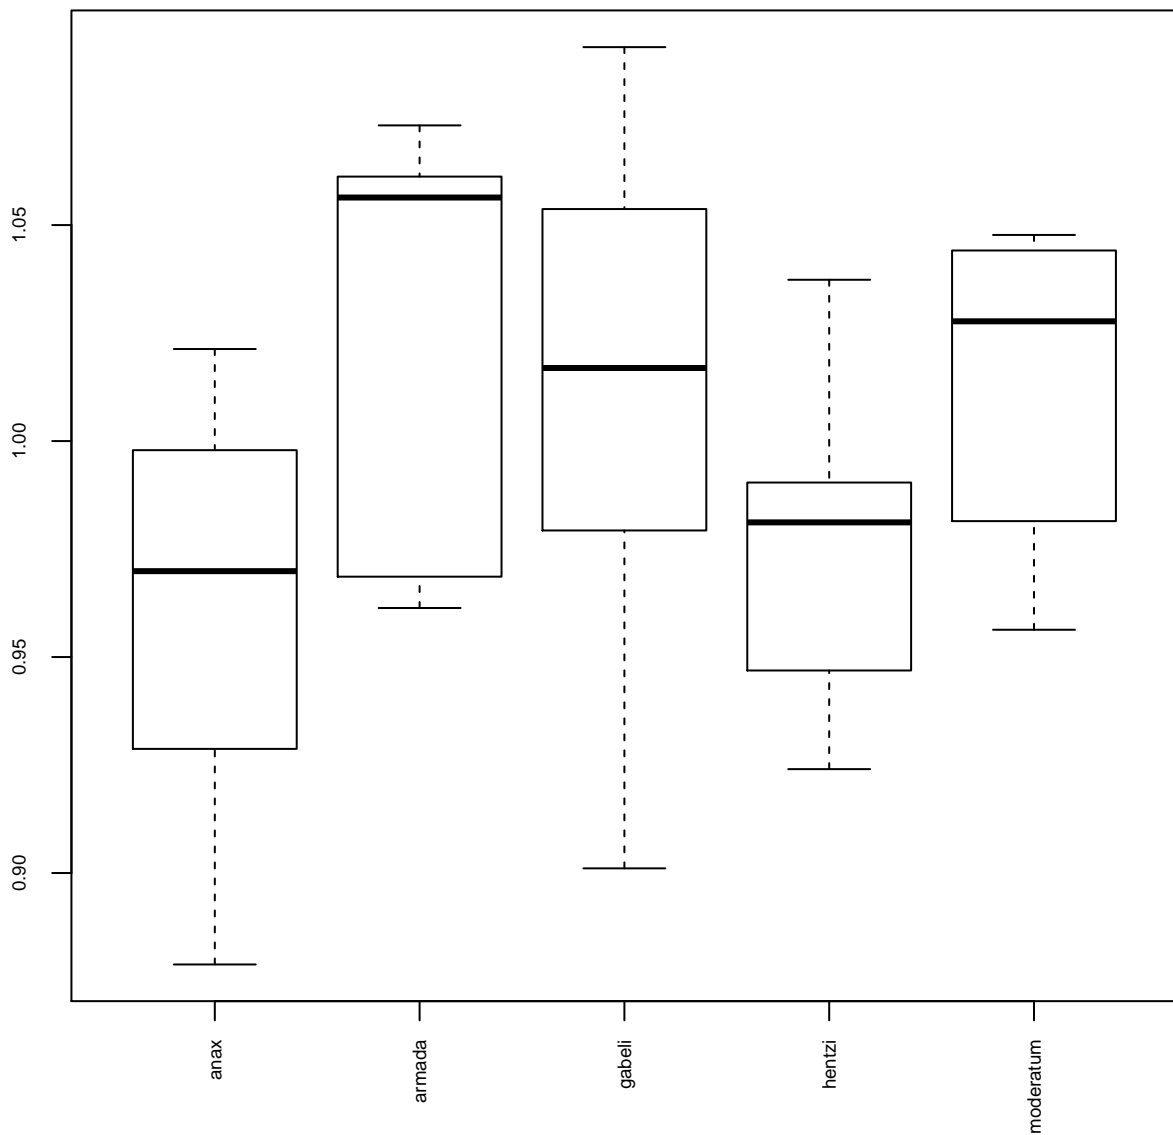

Supplement: Supplementary file 1209

## Tibia 1/Tarsus 3 Length ratio – females

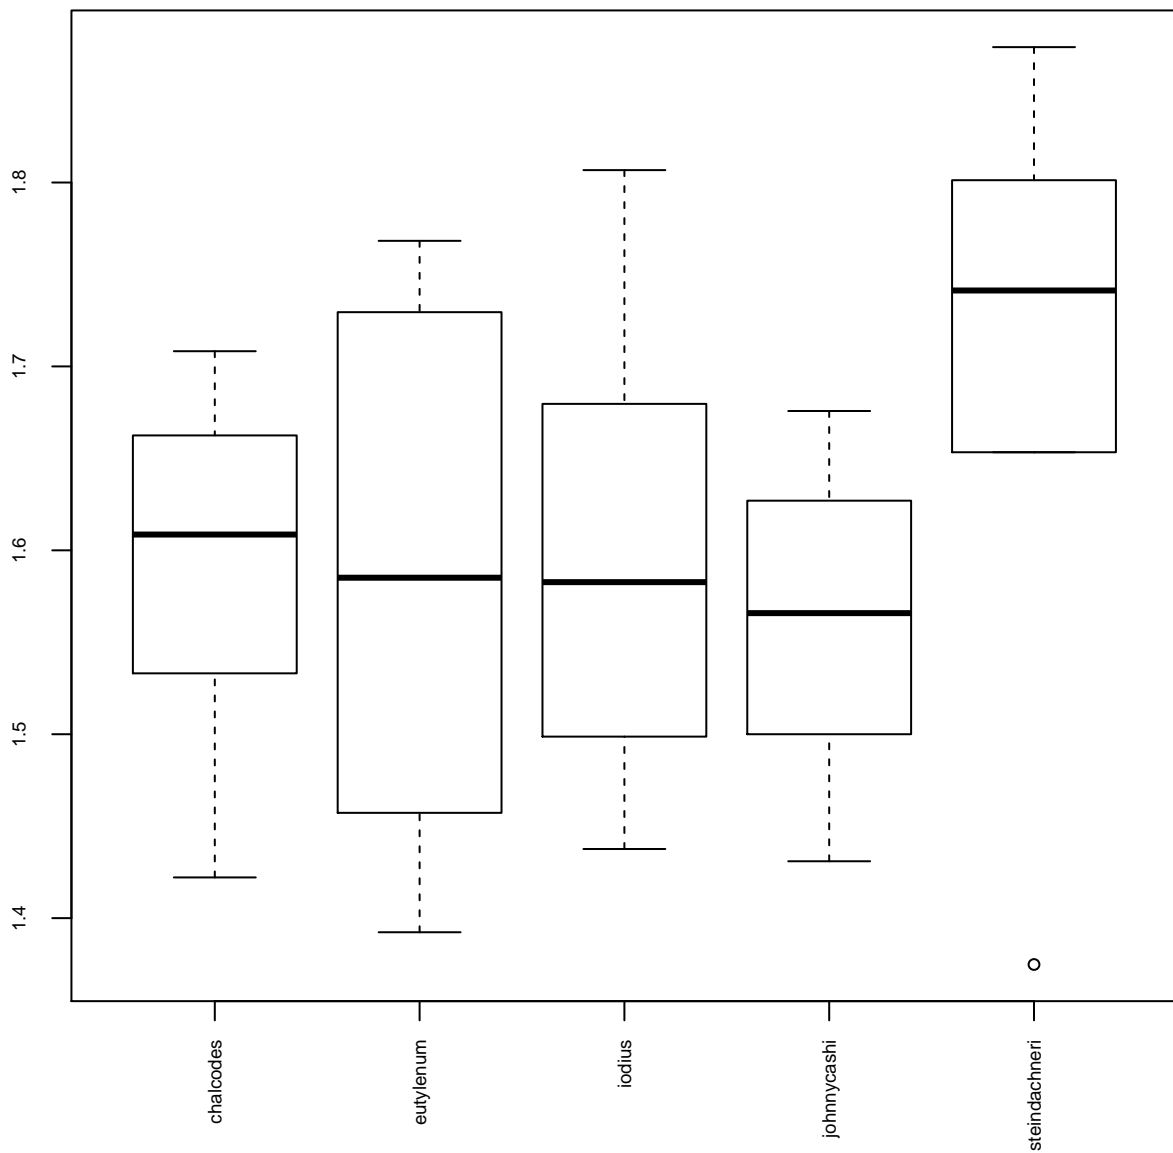

Supplement: Supplementary file 1210

## Femur 3/Patella 4 Length ratio – males

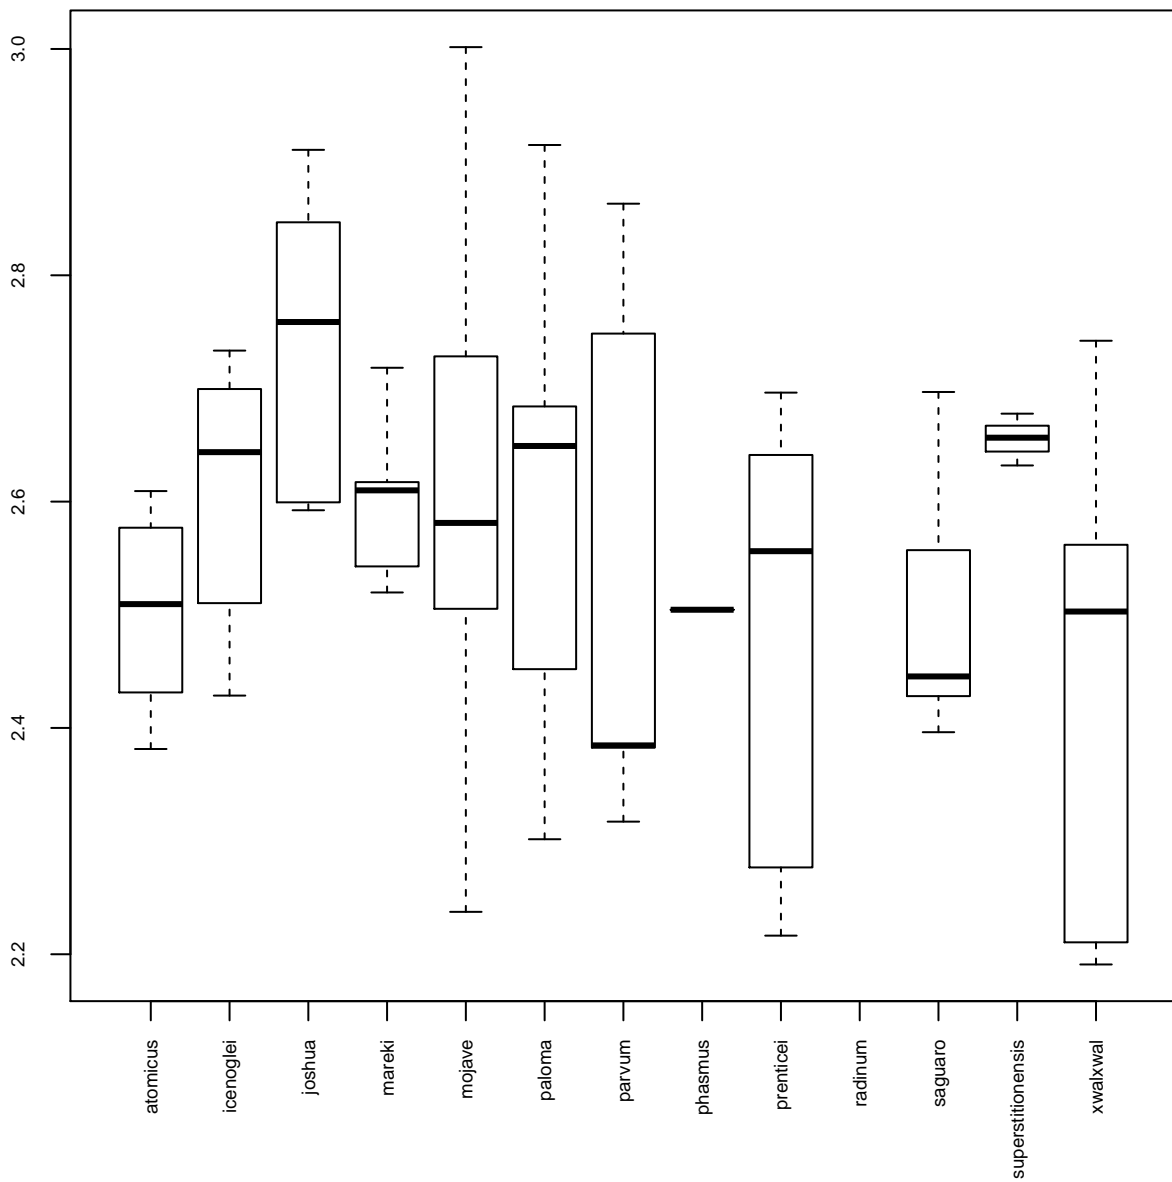

Supplement: Supplementary file 1211

## Metatarsus 3/Femur 4 Length ratio – females

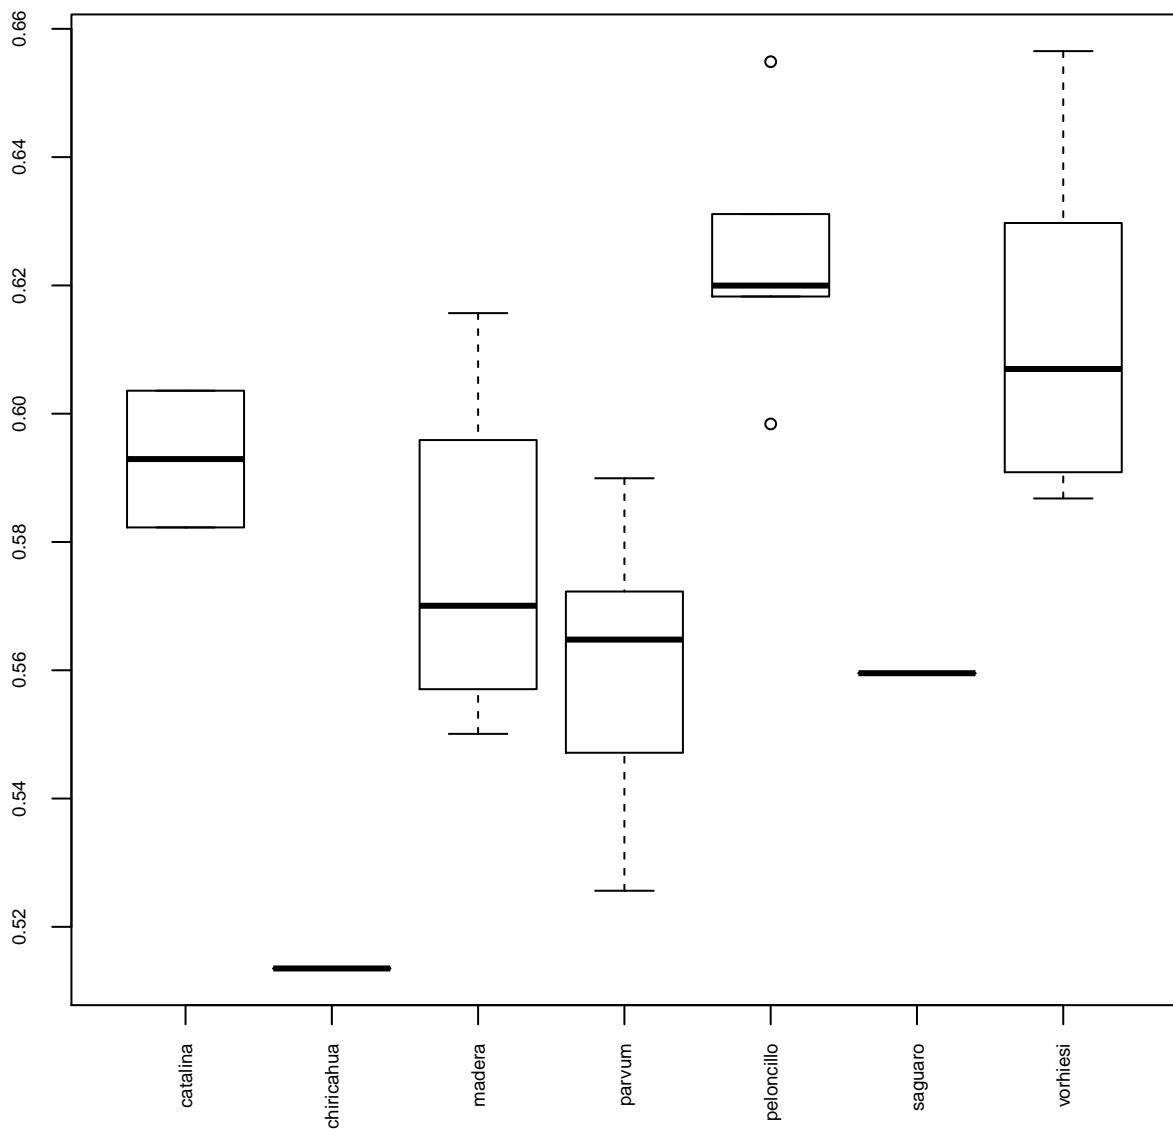

Supplement: Supplementary file 1212

## Palpal Tibia/Femur 4 Length ratio – males

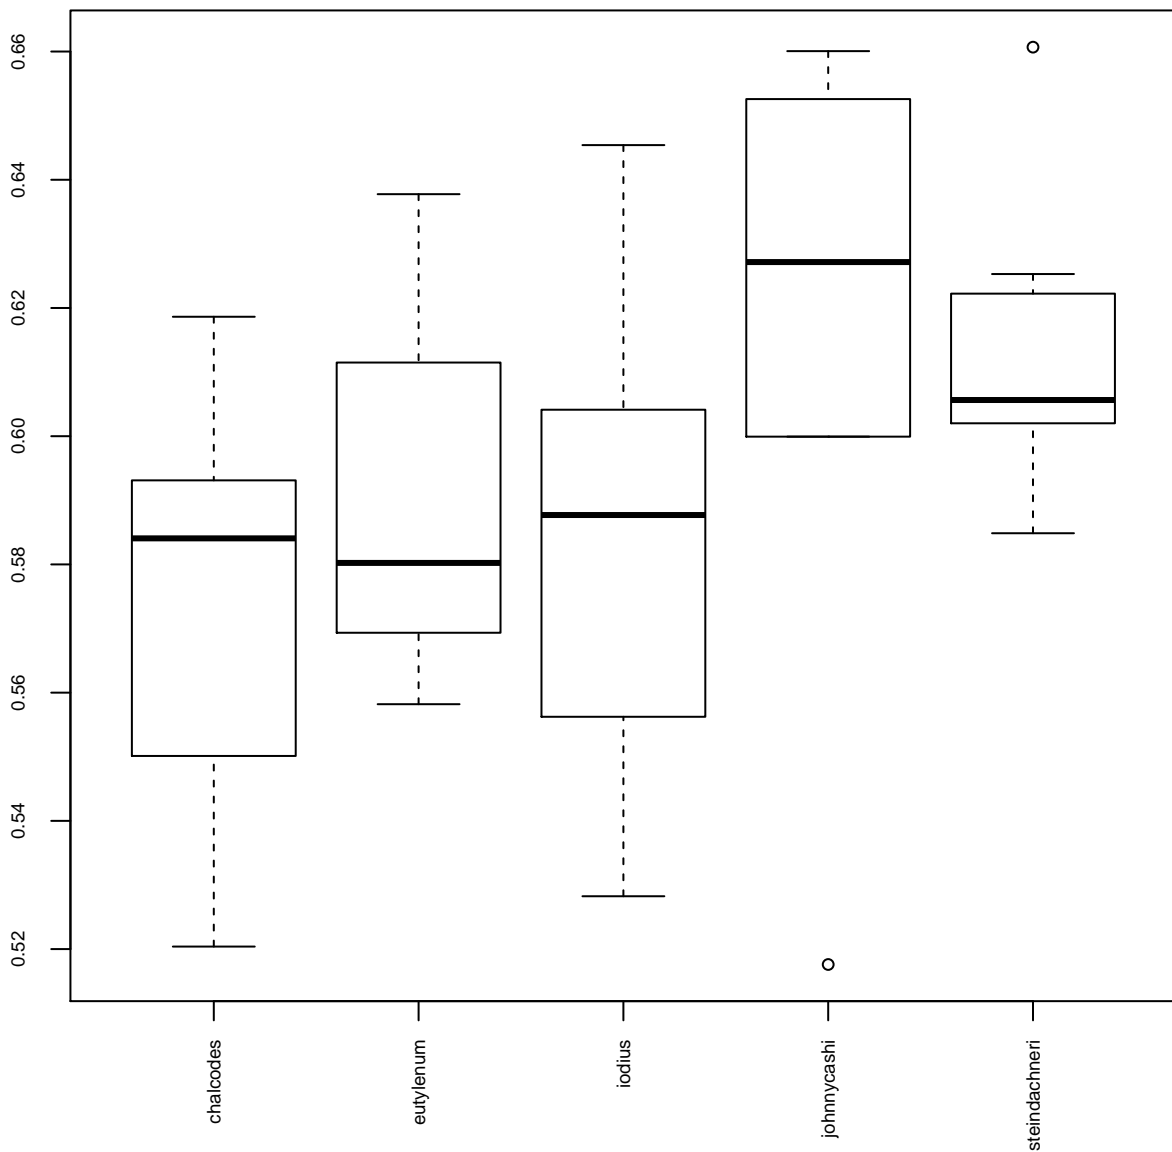

Supplement: Supplementary file 1213

## Femur 3/Patella 3 ratio – males

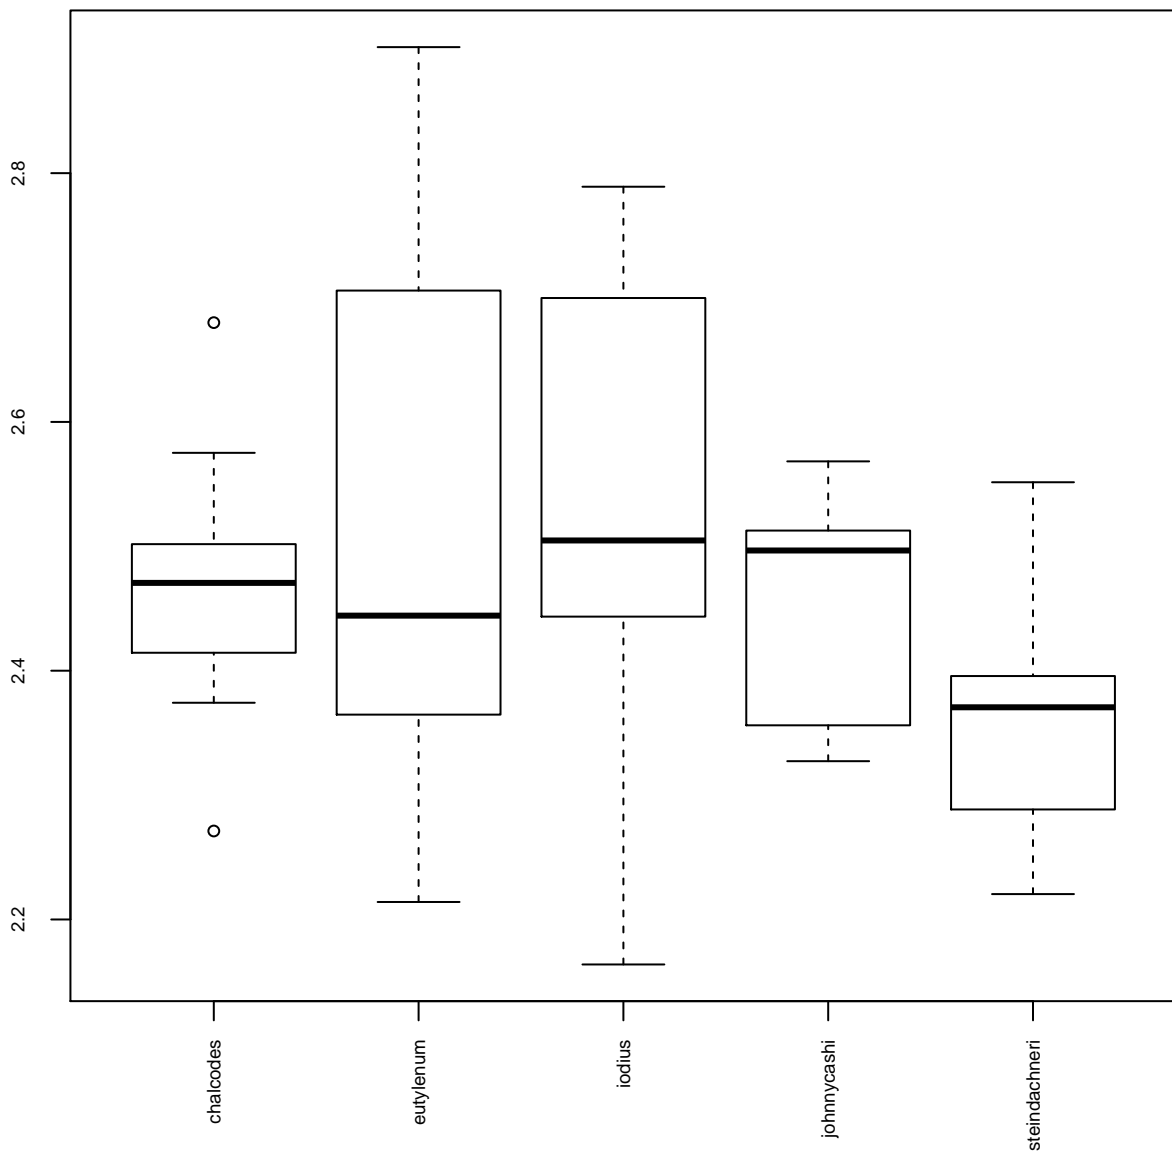

Supplement: Supplementary file 1214

### Leg 3 Scopulation ratio – males

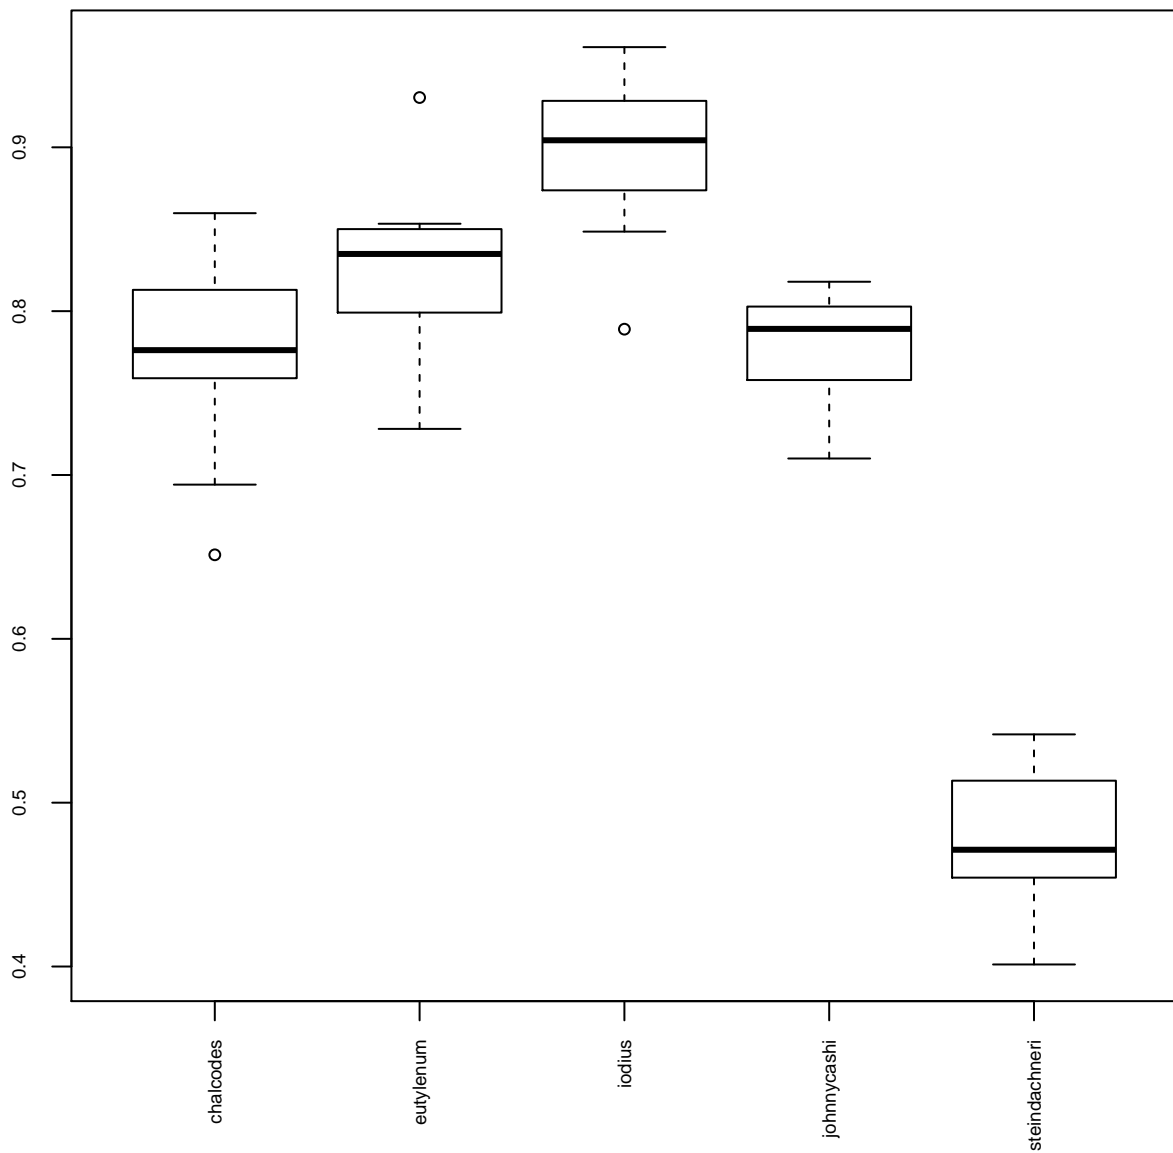

Supplement: Supplementary file 1215

## Carapace Length/Tarsus 3 ratio – females

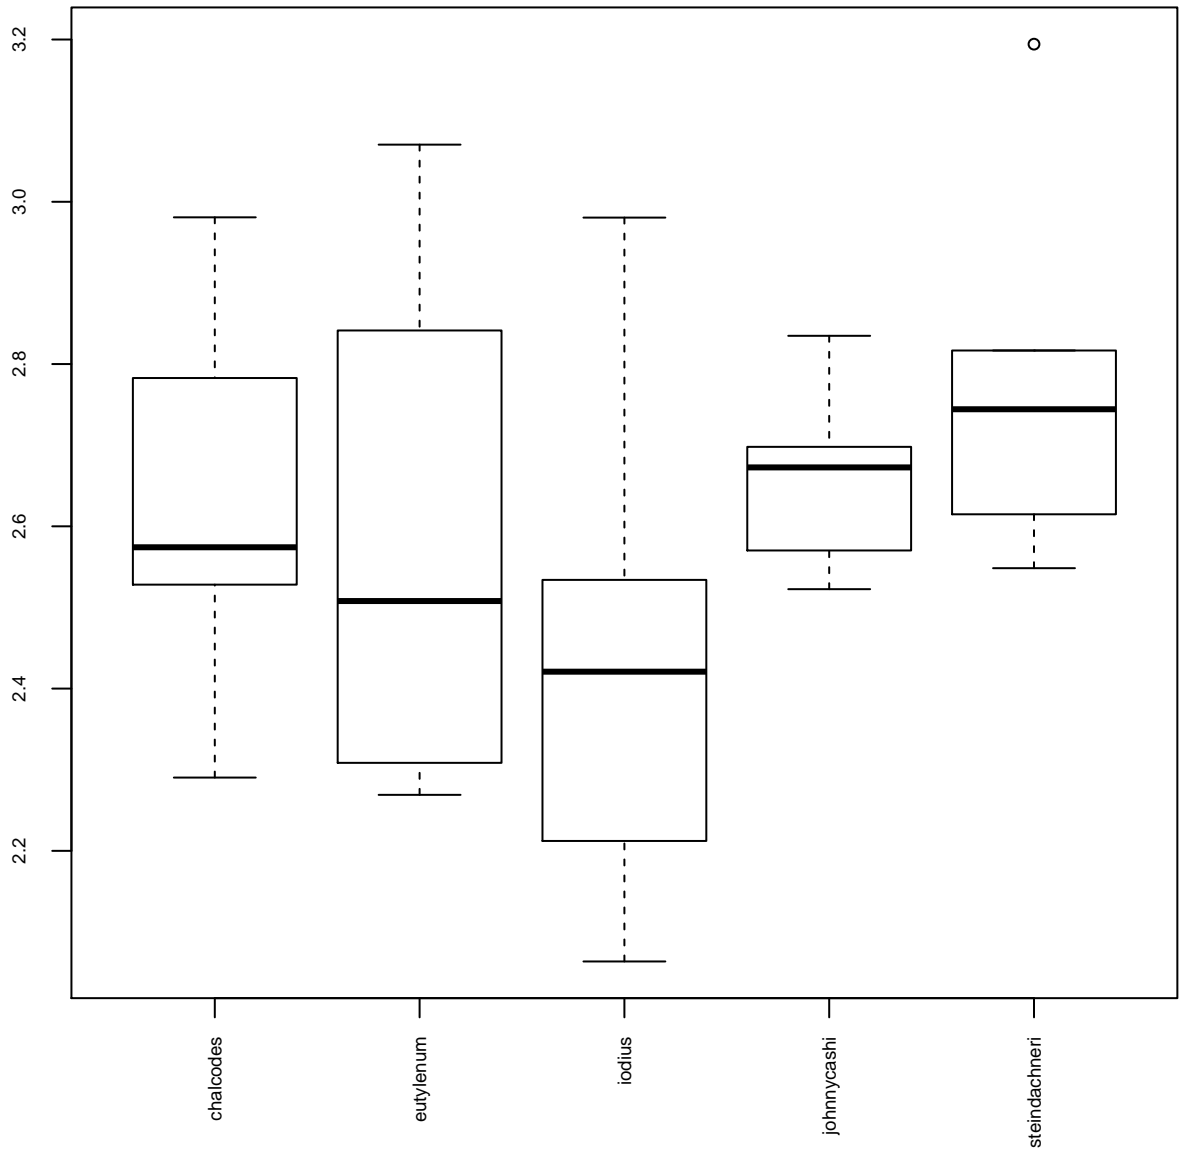

Supplement: Supplementary file 1216

# Tarsus 1/Femur 4 Length ratio – males

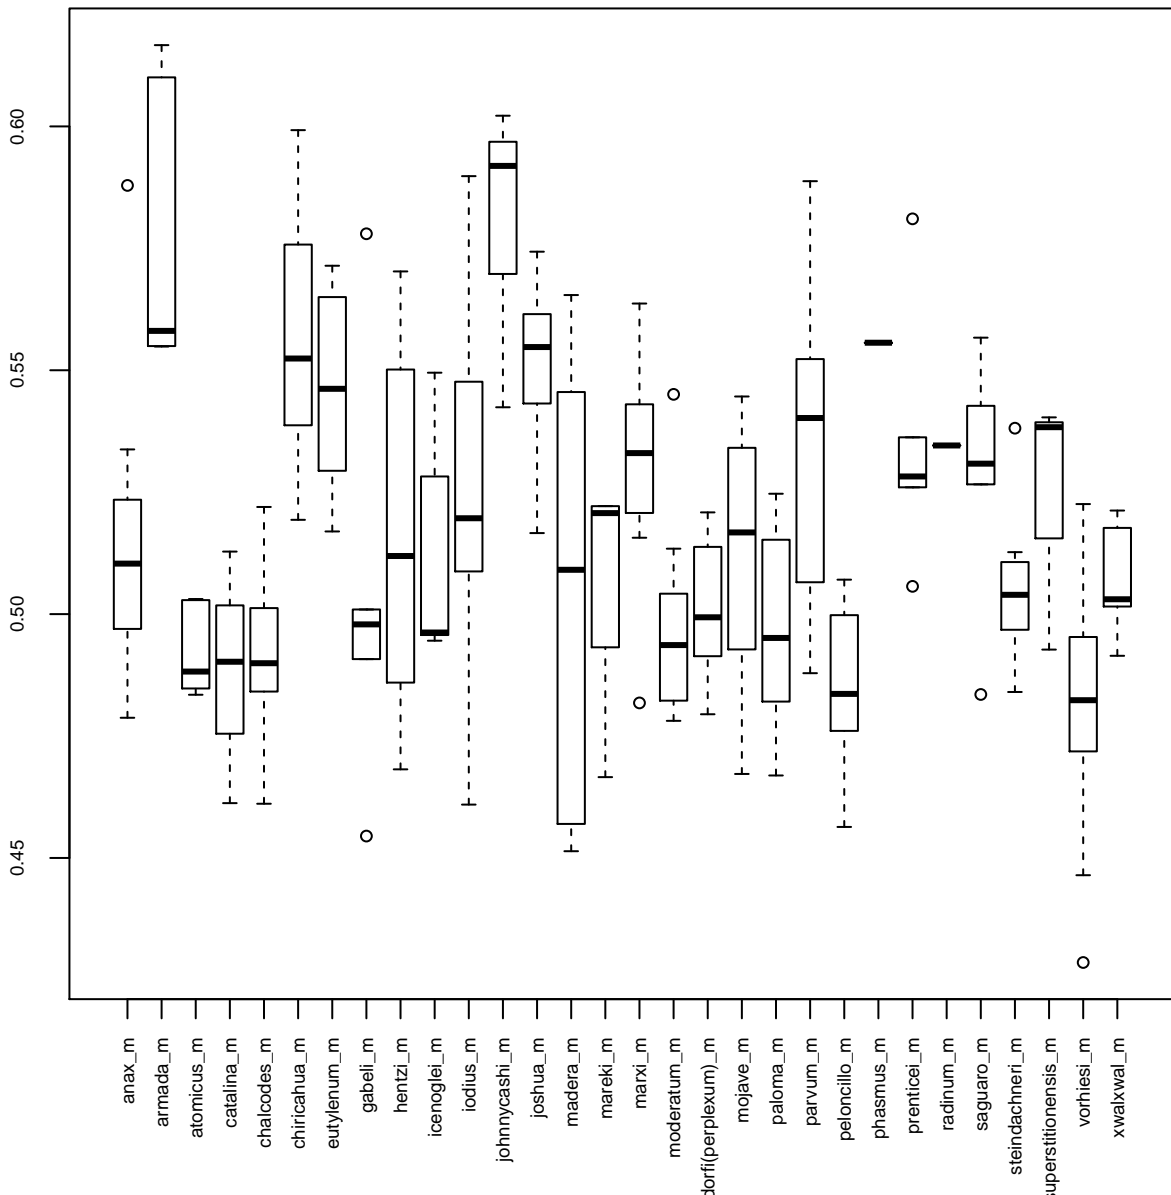

Supplement: Supplementary file 1217

## Femur 1/Tibia 4 ratio – males

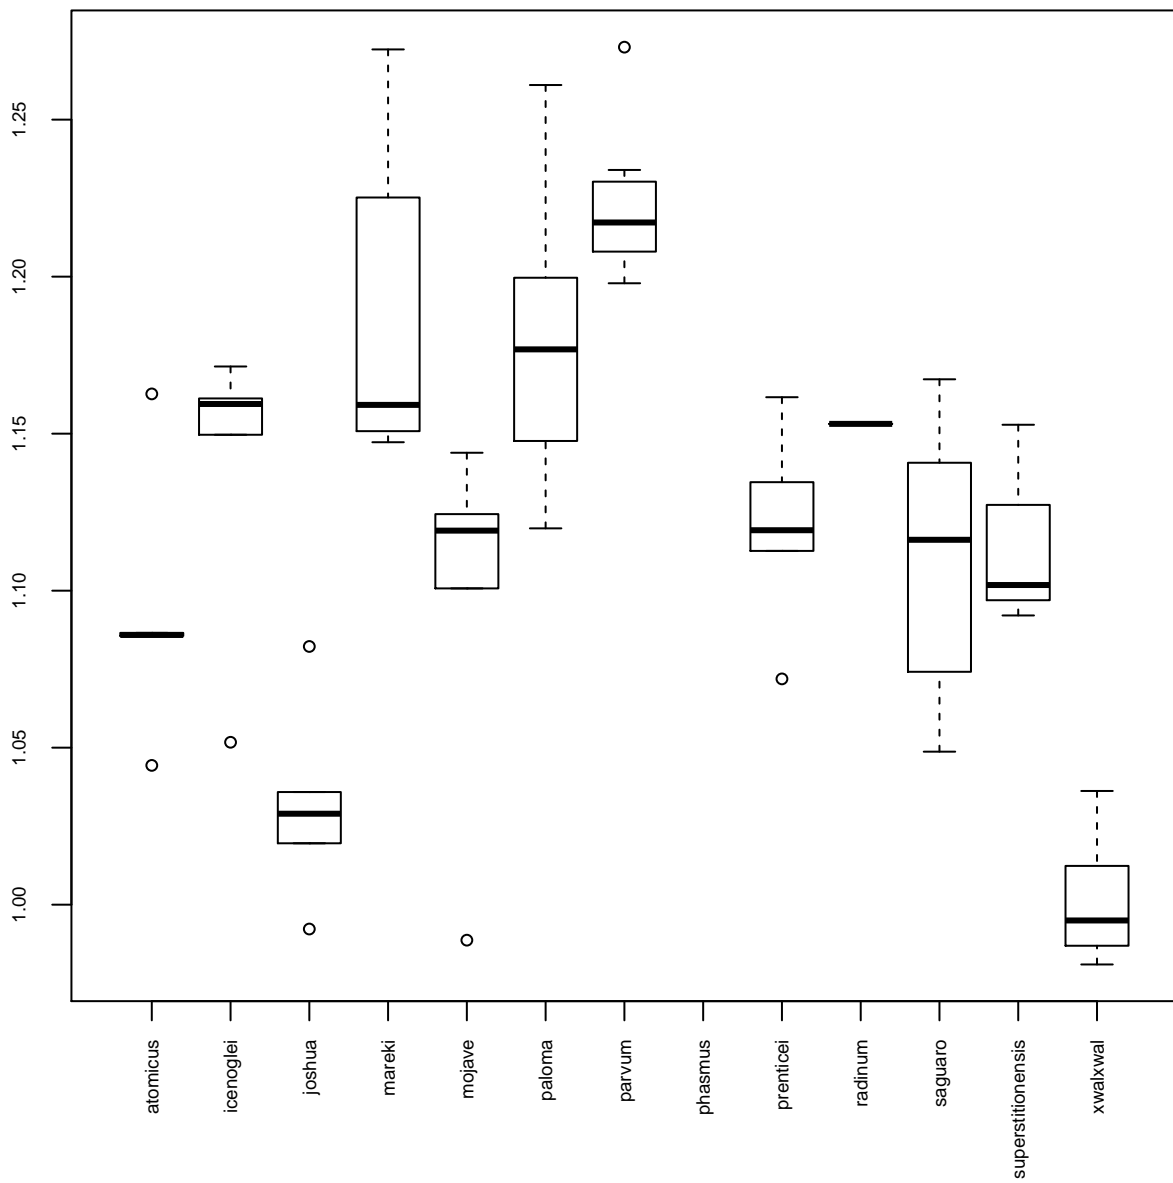

Supplement: Supplementary file 1218

## Tibia 1/Tarsus 3 Length ratio – males

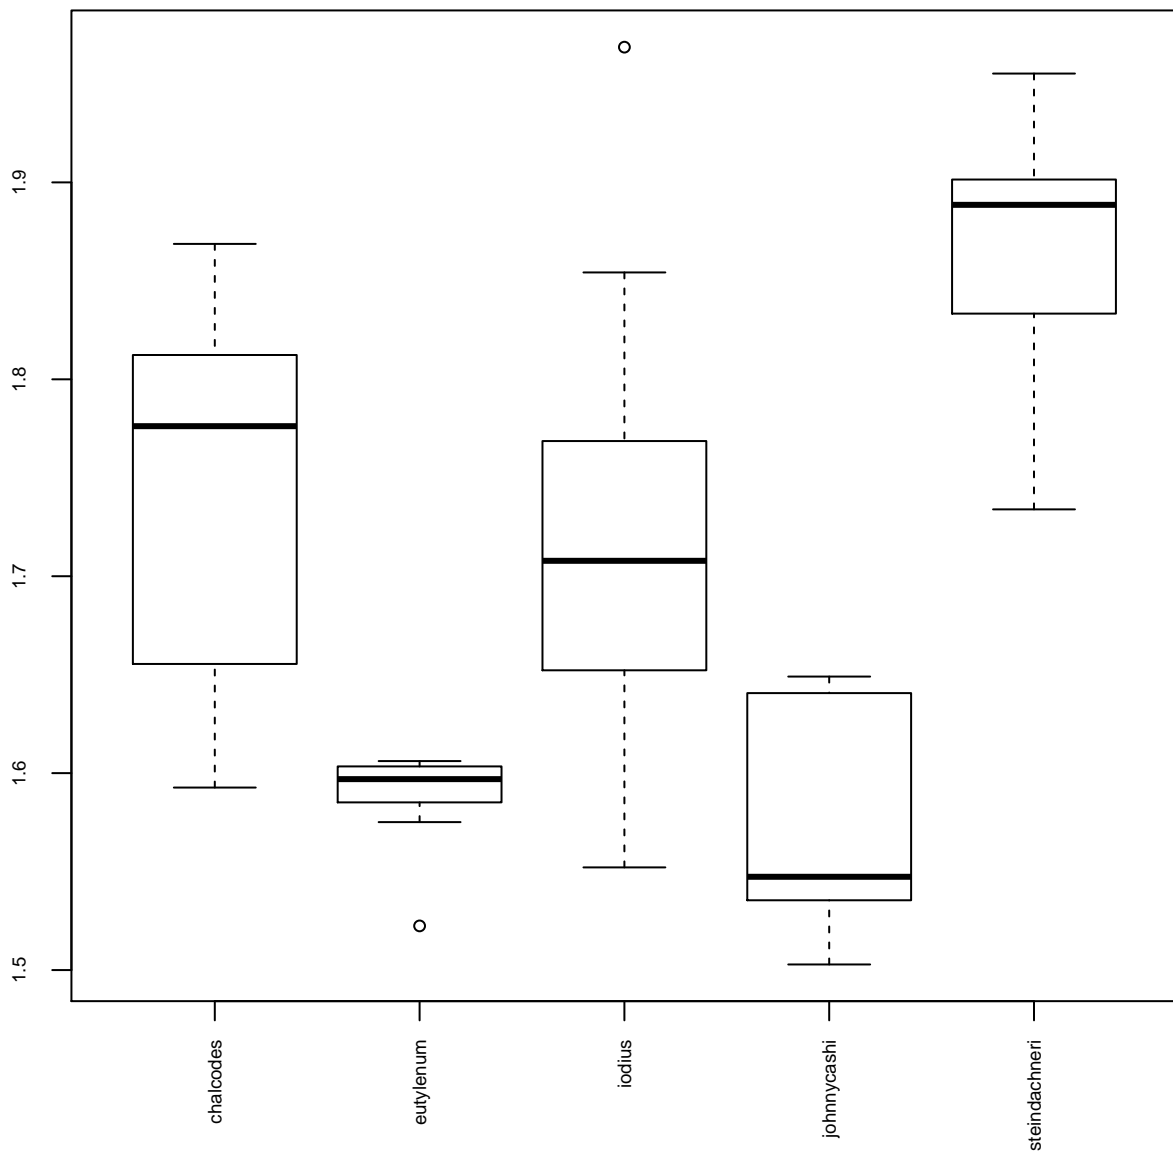

Supplement: Supplementary file 1219

## Tarsus 3/Tibia 4 Length ratio – males

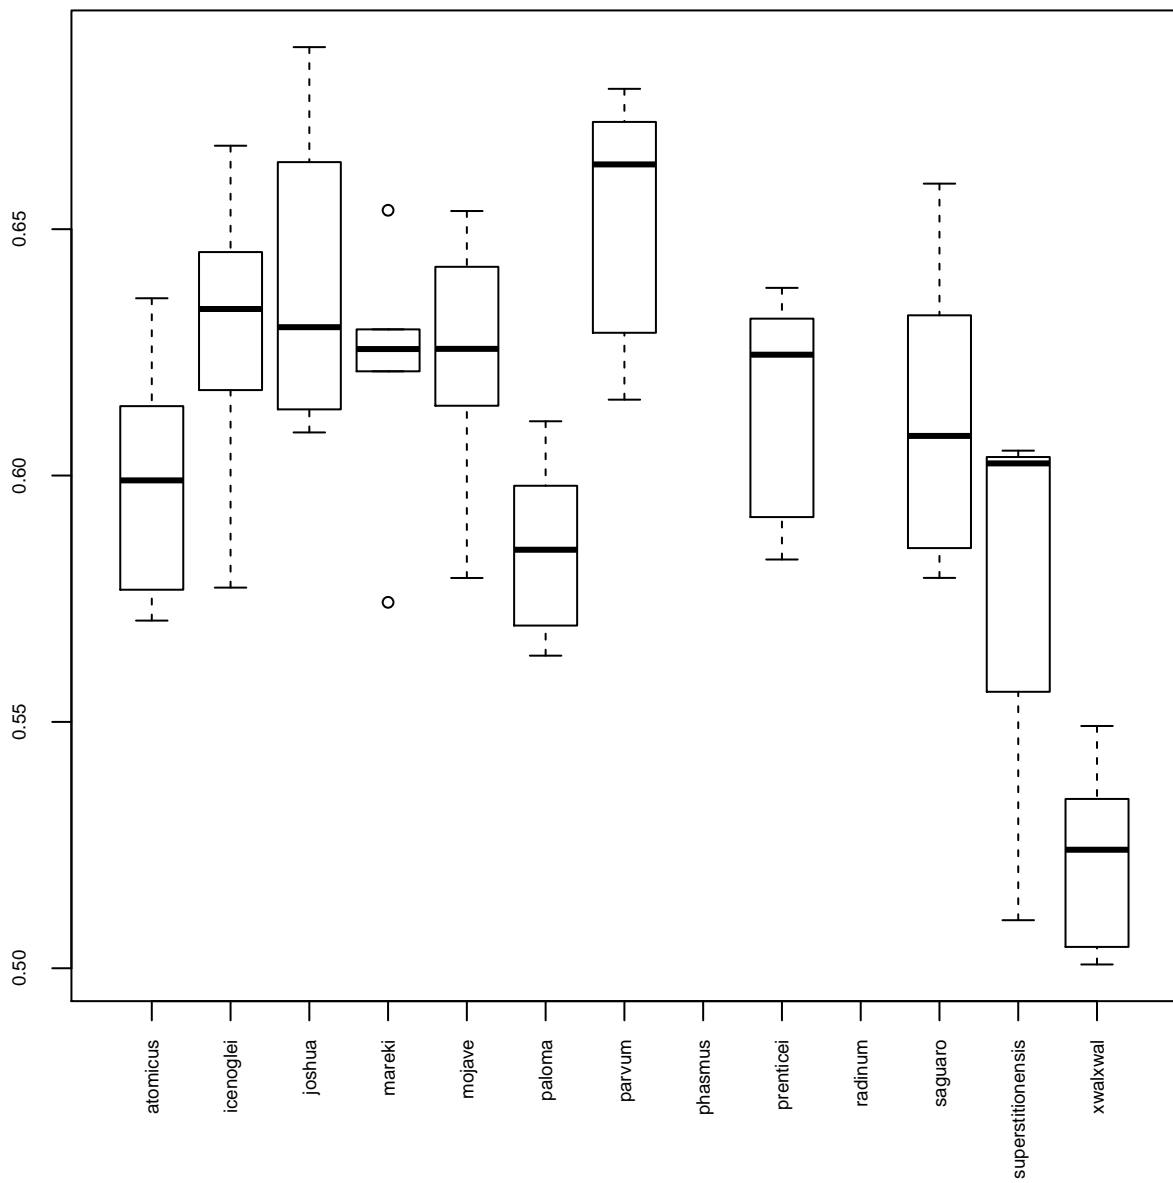

Supplement: Supplementary file 1220

## Leg 4 Length/Carapace Length ratio – females

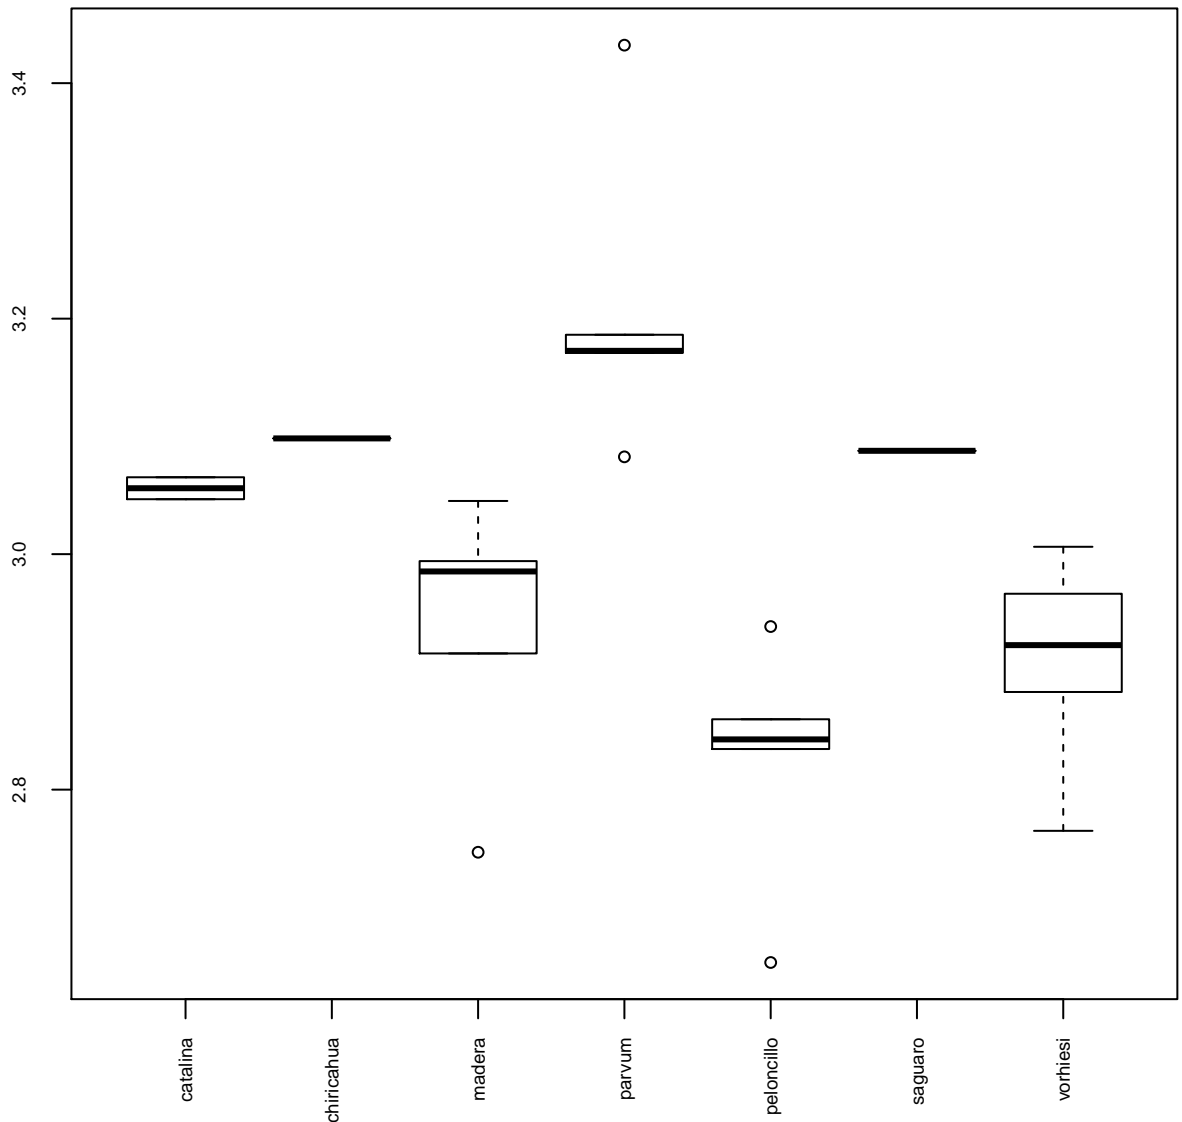

Supplement: Supplementary file 1221

## Carapace Length – females

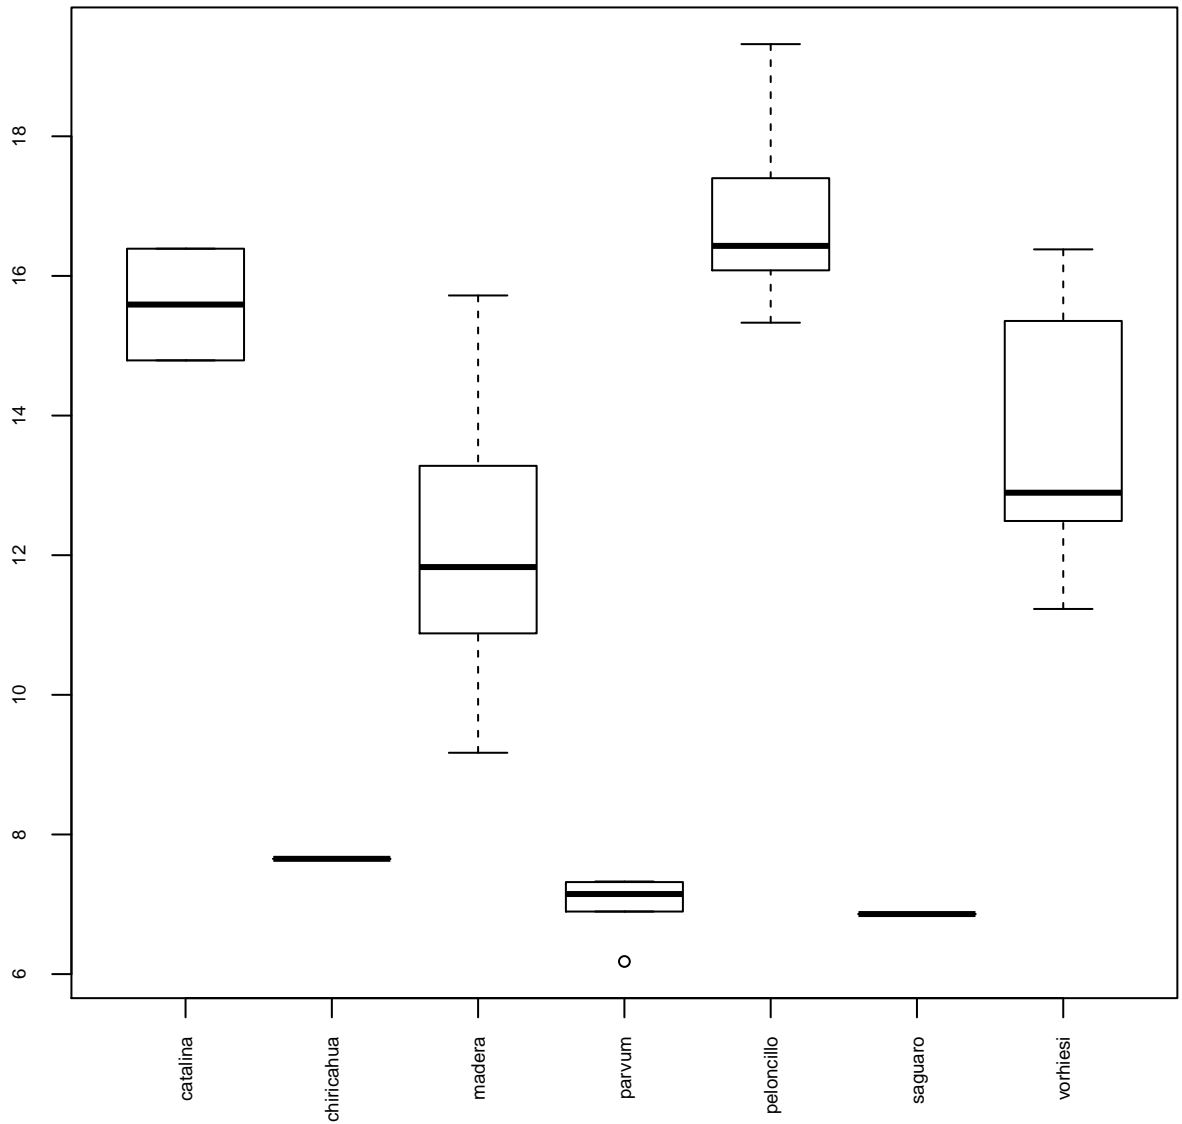

Supplement: Supplementary file 1222

## Metatarsus 1/Tarsus 3 Length ratio – males

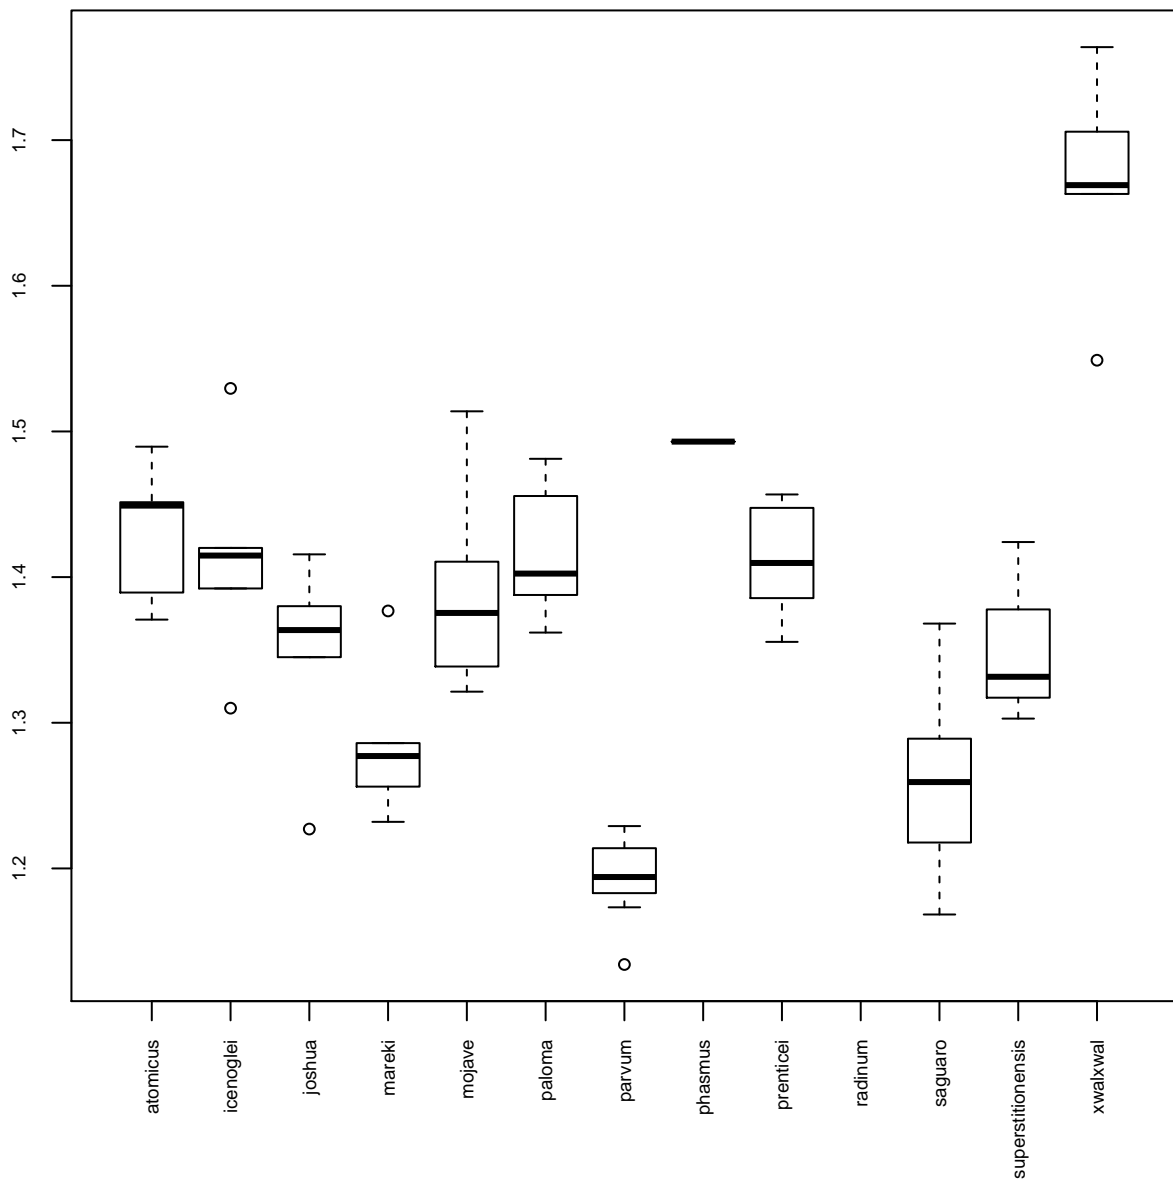

Supplement: Supplementary file 1223

## Leg 1 Length – males

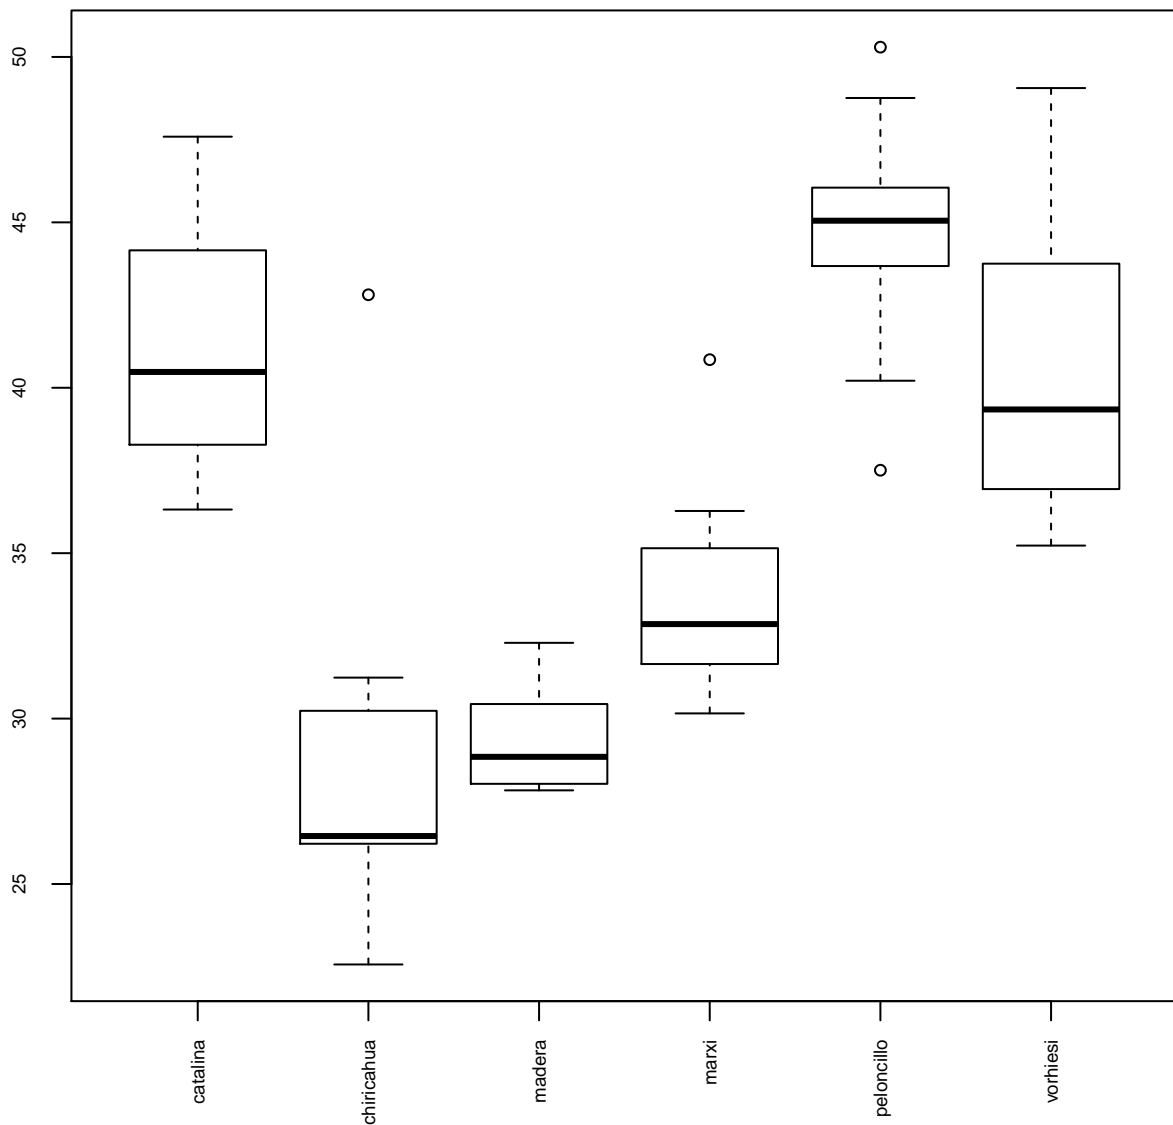

Supplement: Supplementary file 1224

## Leg 1 Length/Carapace Length ratio – males

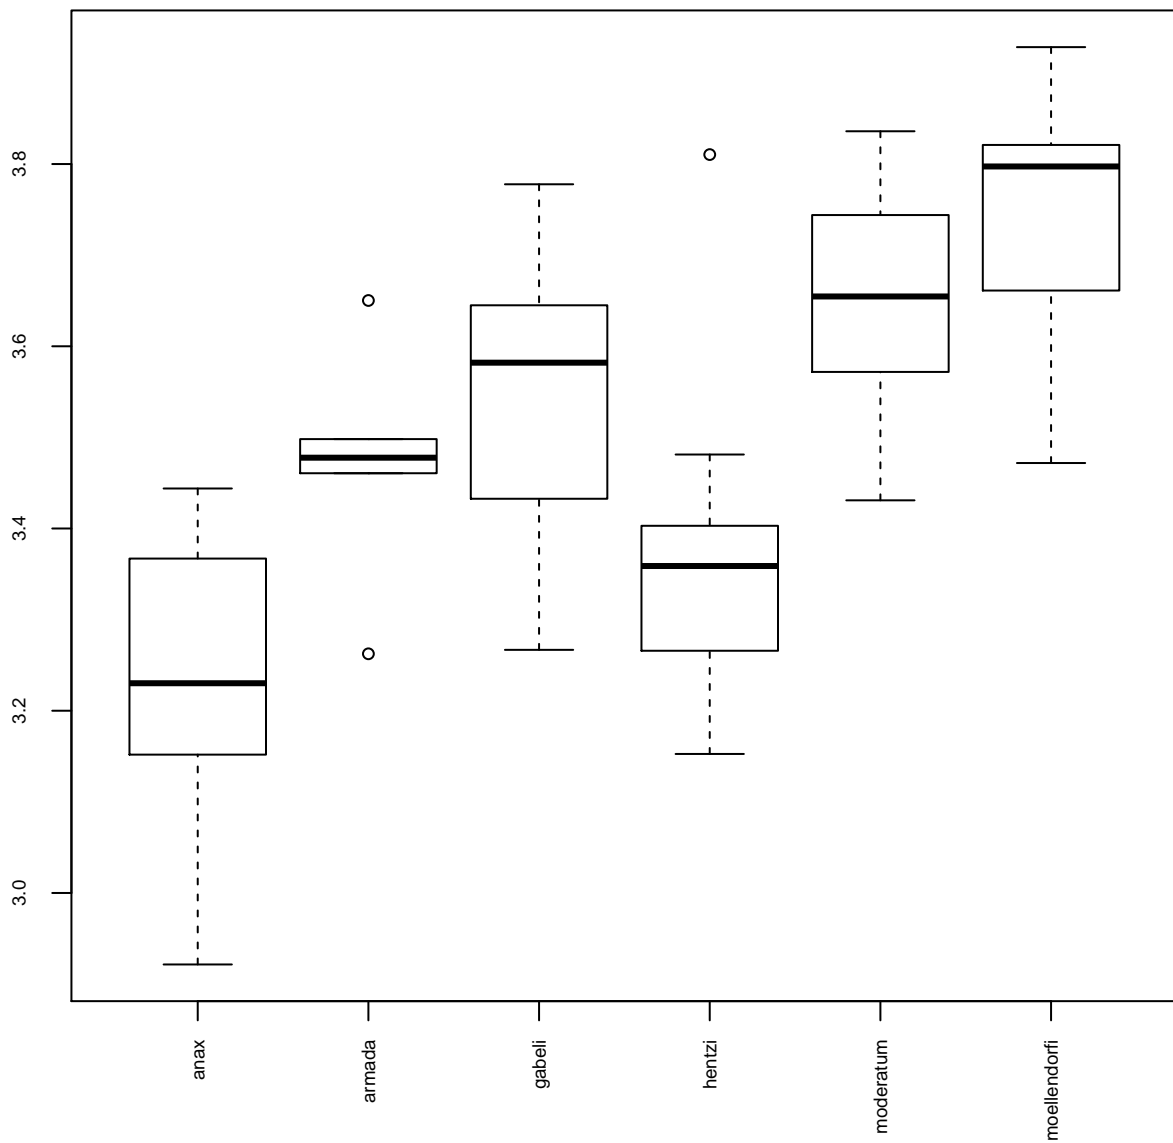

Supplement: Supplementary file 1225

# Patella 3/Tarsus 3 ratio – females

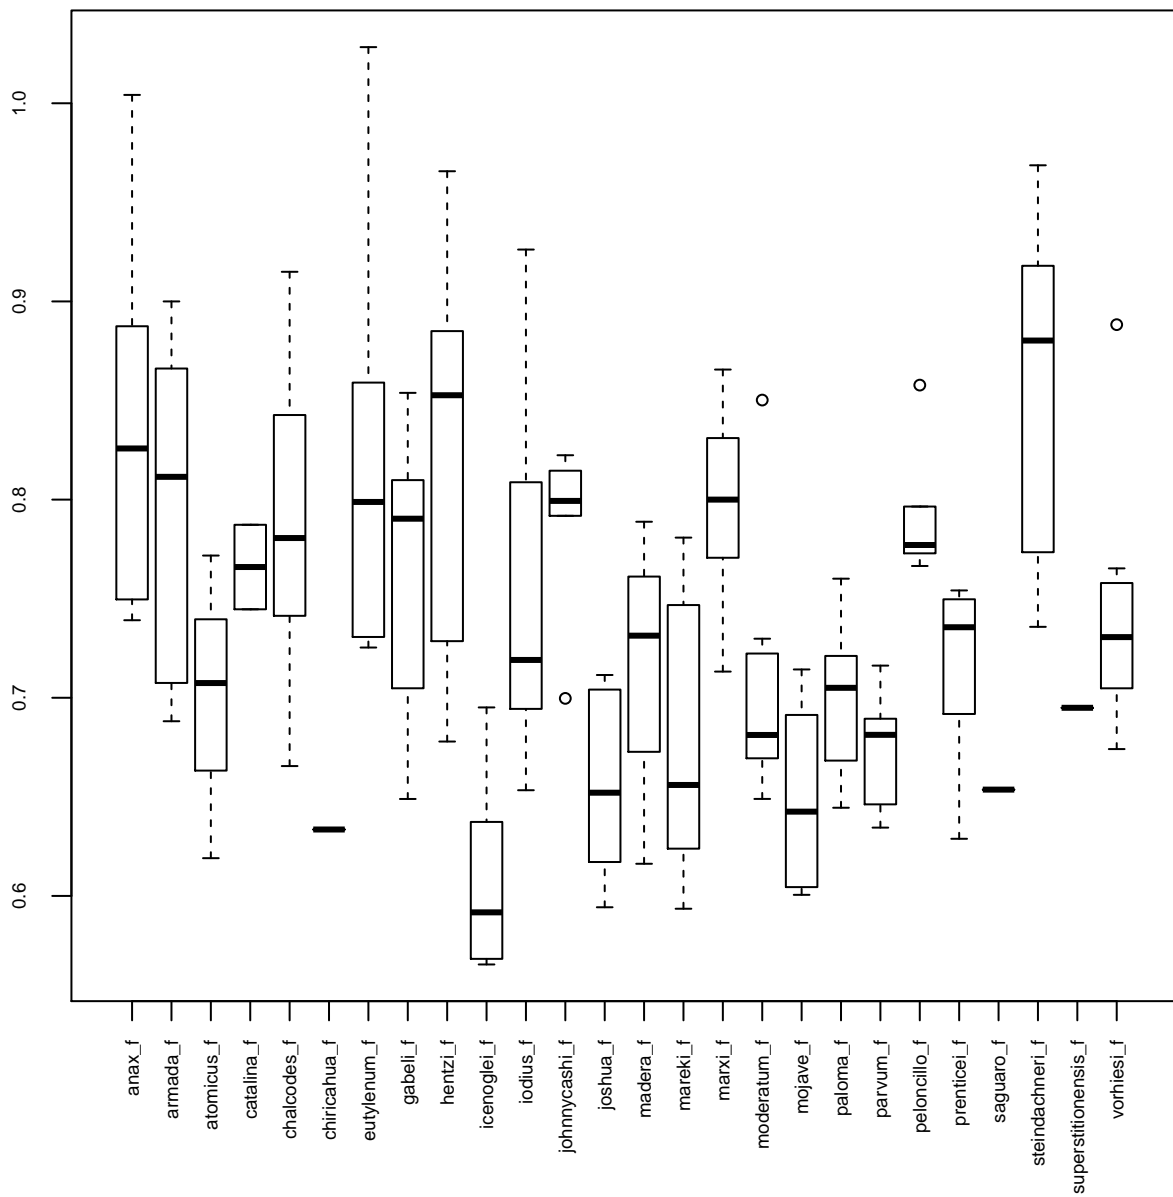

Supplement: Supplementary file 1226

## Patella 1/Patella 4 ratio – females

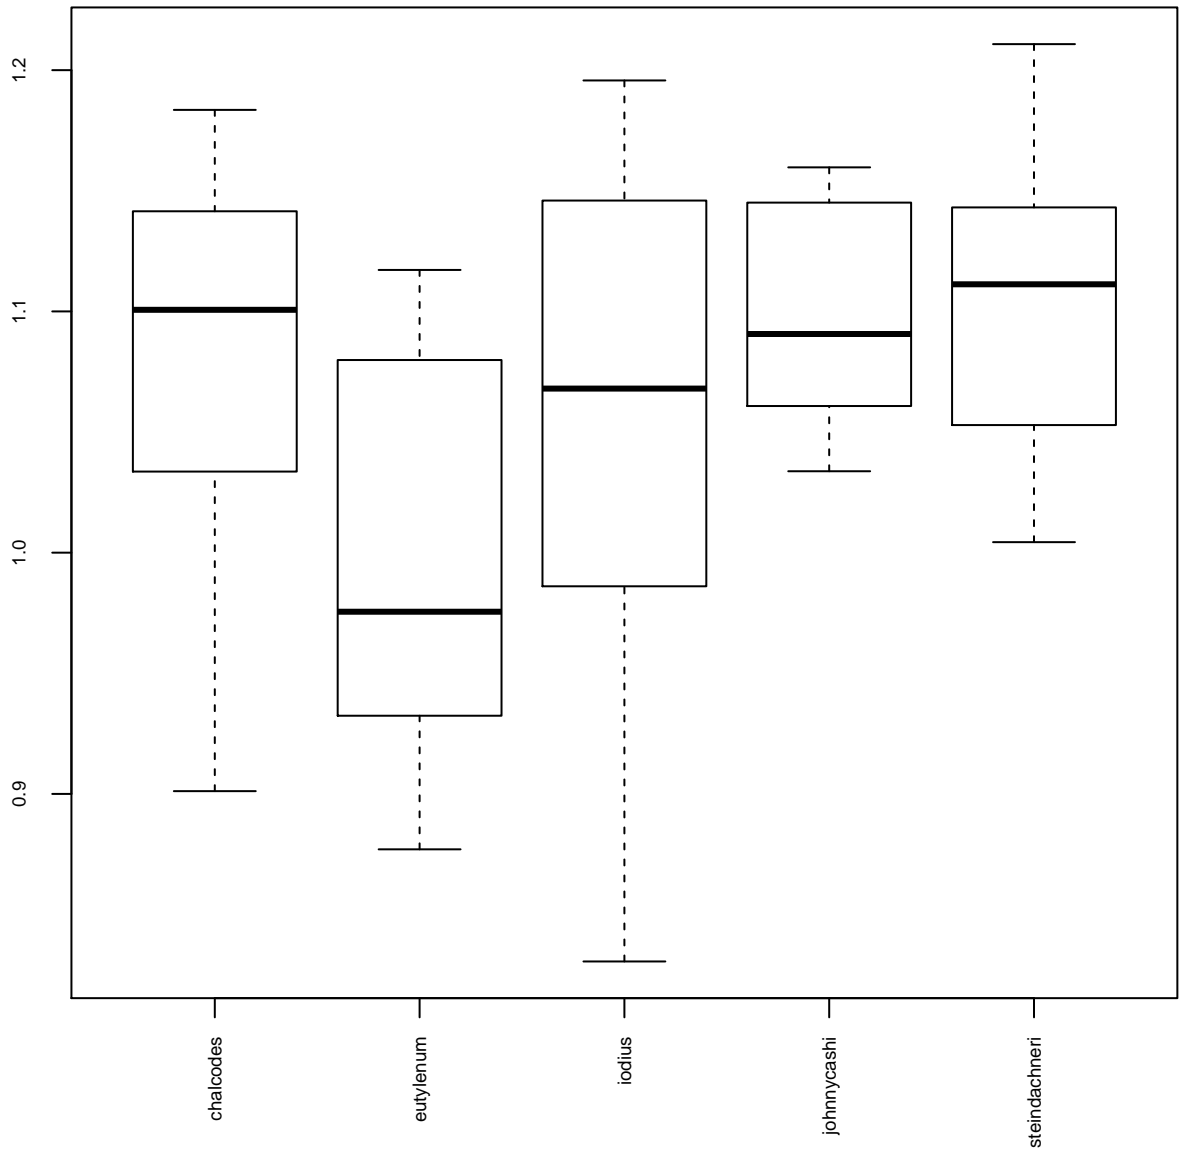

Supplement: Supplementary file 1227

## Palpal Tibia/Femur 3 Length ratio – males

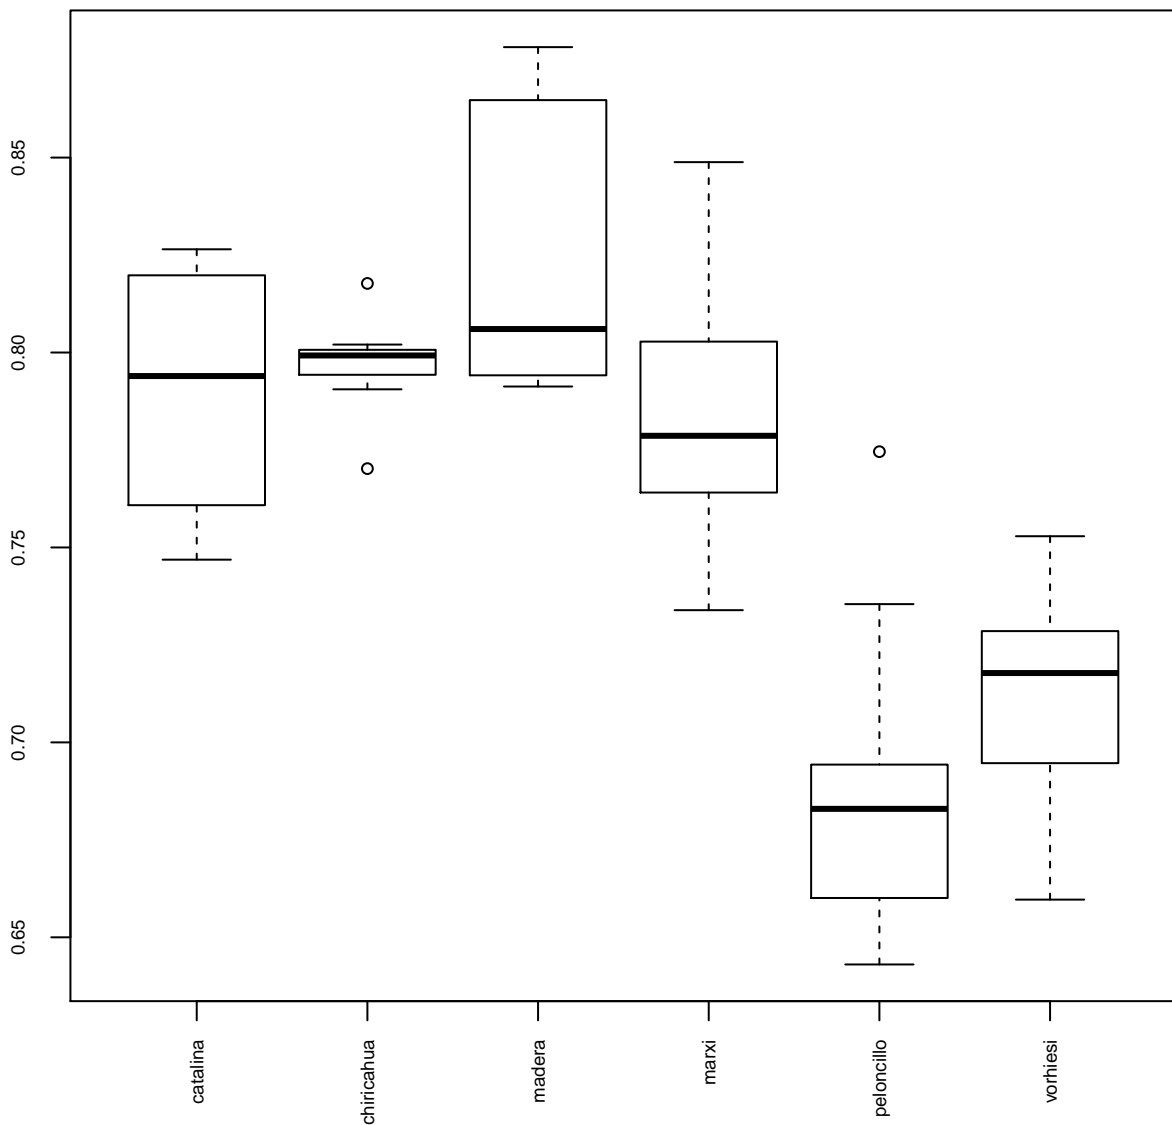

Supplement: Supplementary file 1228

# Metatarsus 1/Patella 4 Length ratio – males

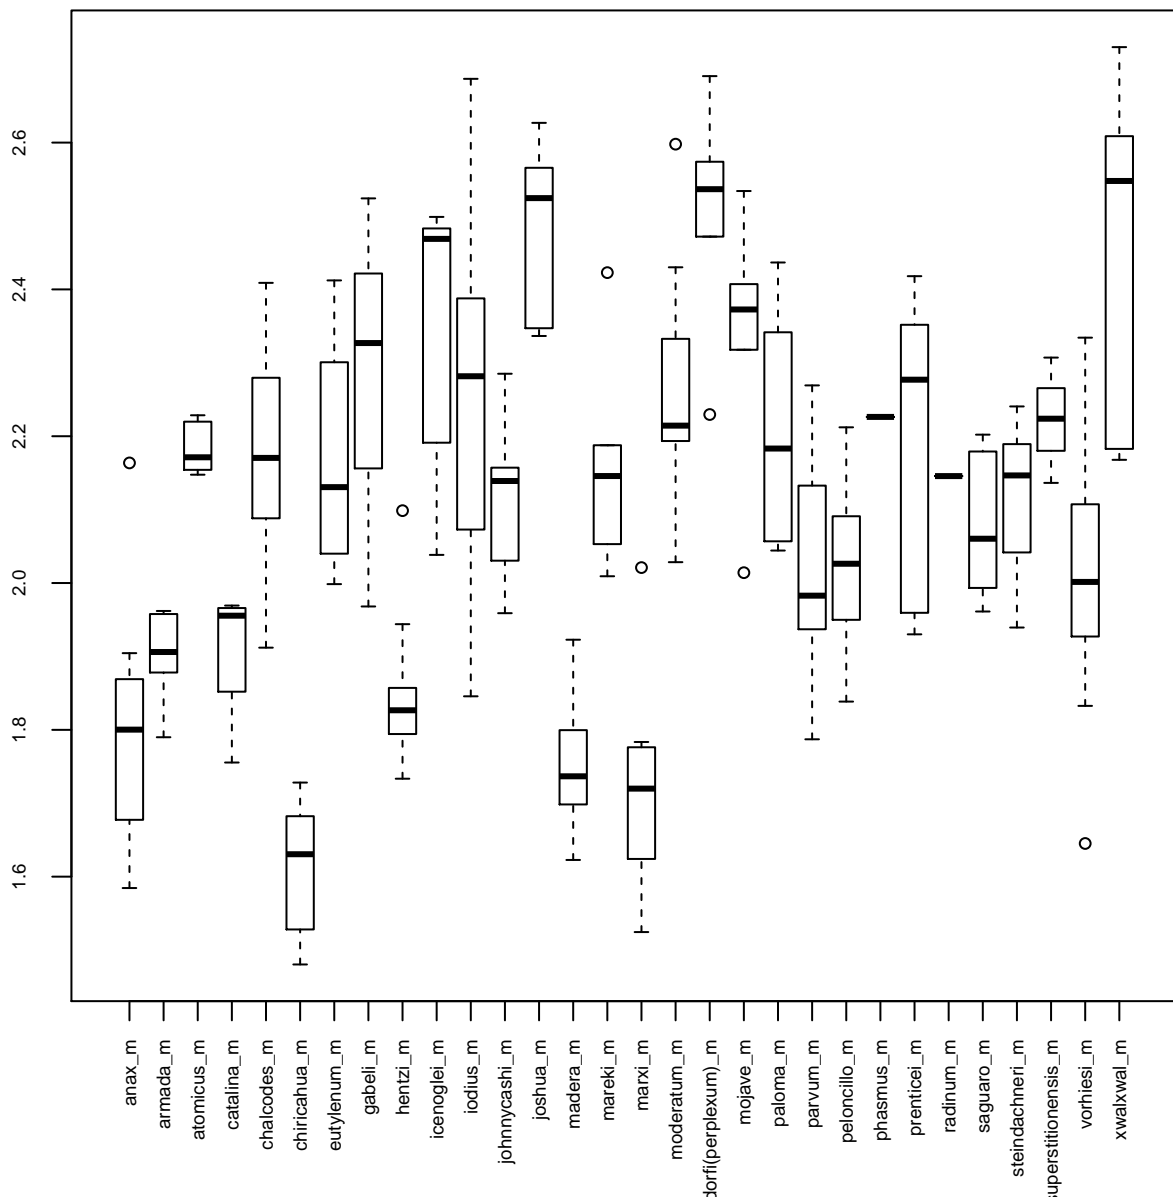

Supplement: Supplementary file 1229

## Metatarsus 1/Metatarsus 4 ratio – females

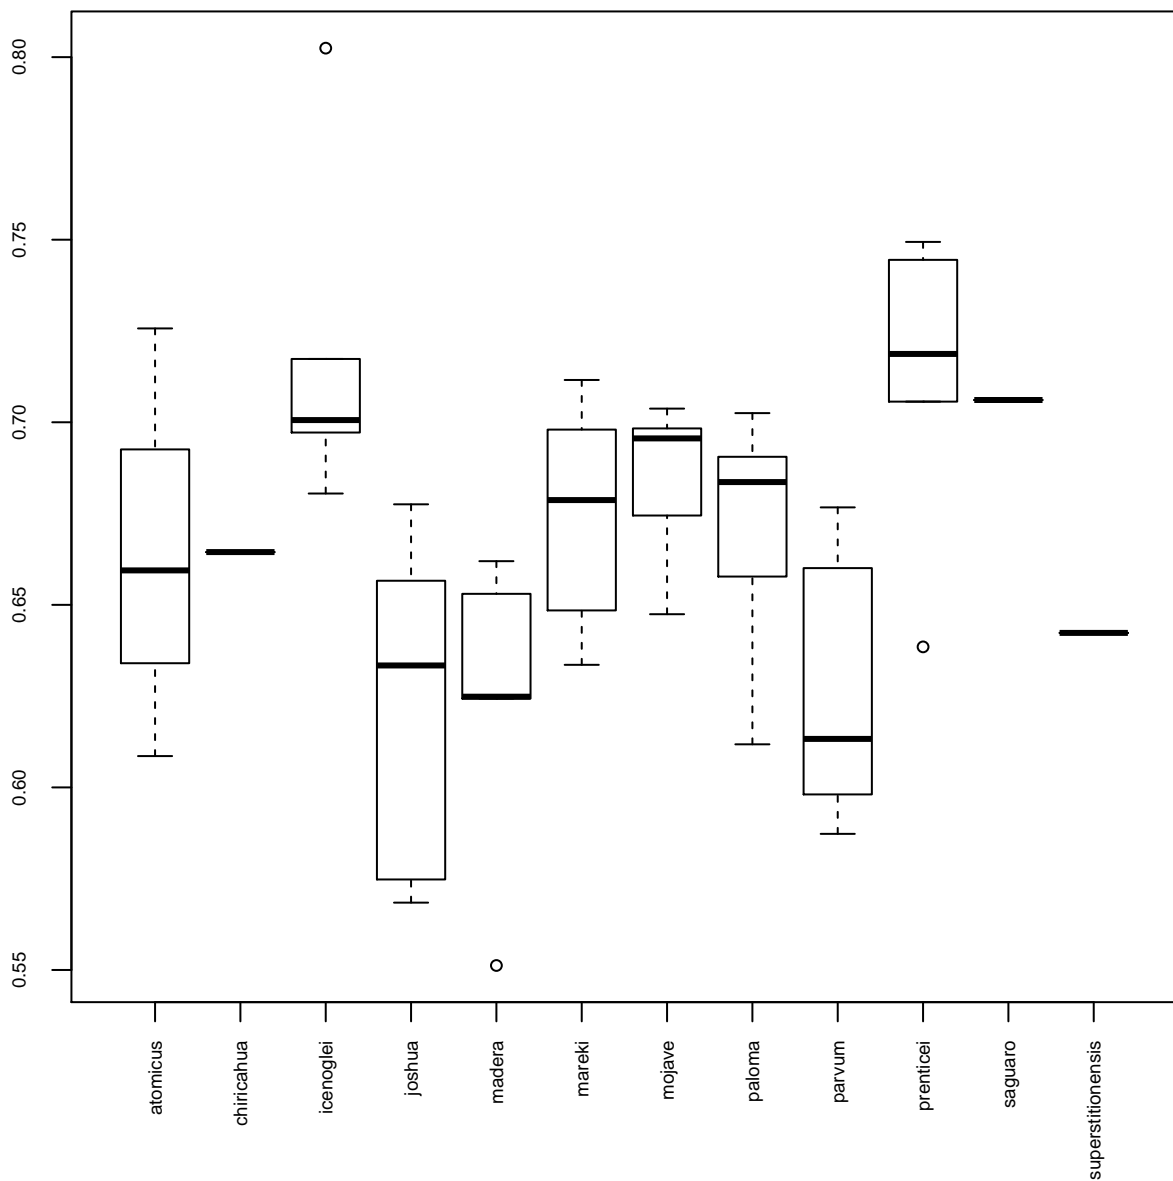

Supplement: Supplementary file 1230

## Carapace Width – males

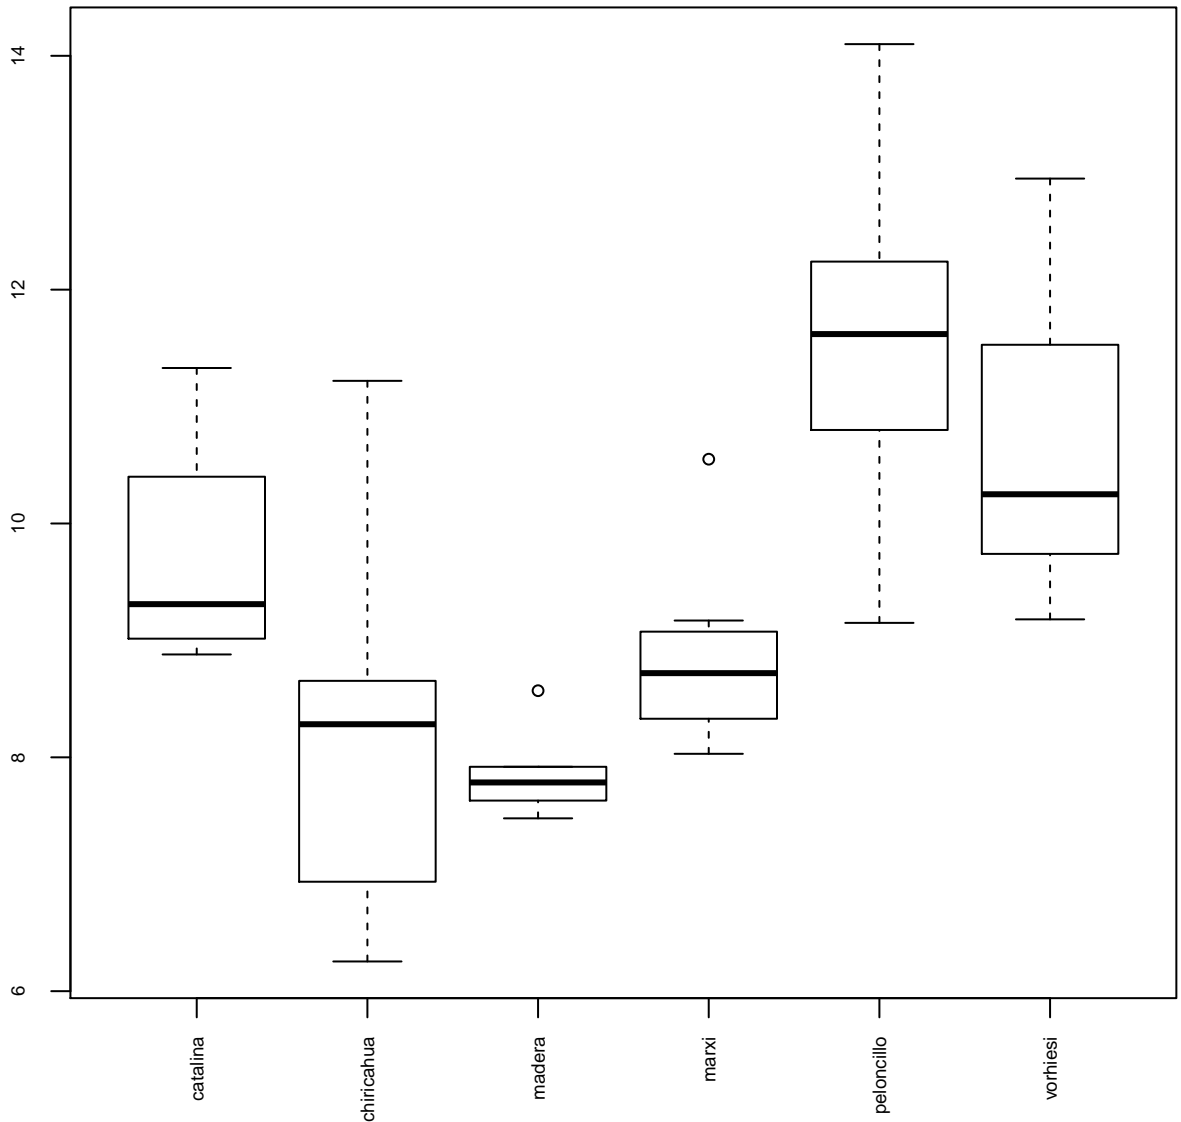

Supplement: Supplementary file 1231

# Carapace Length/Tarsus 1 ratio – males

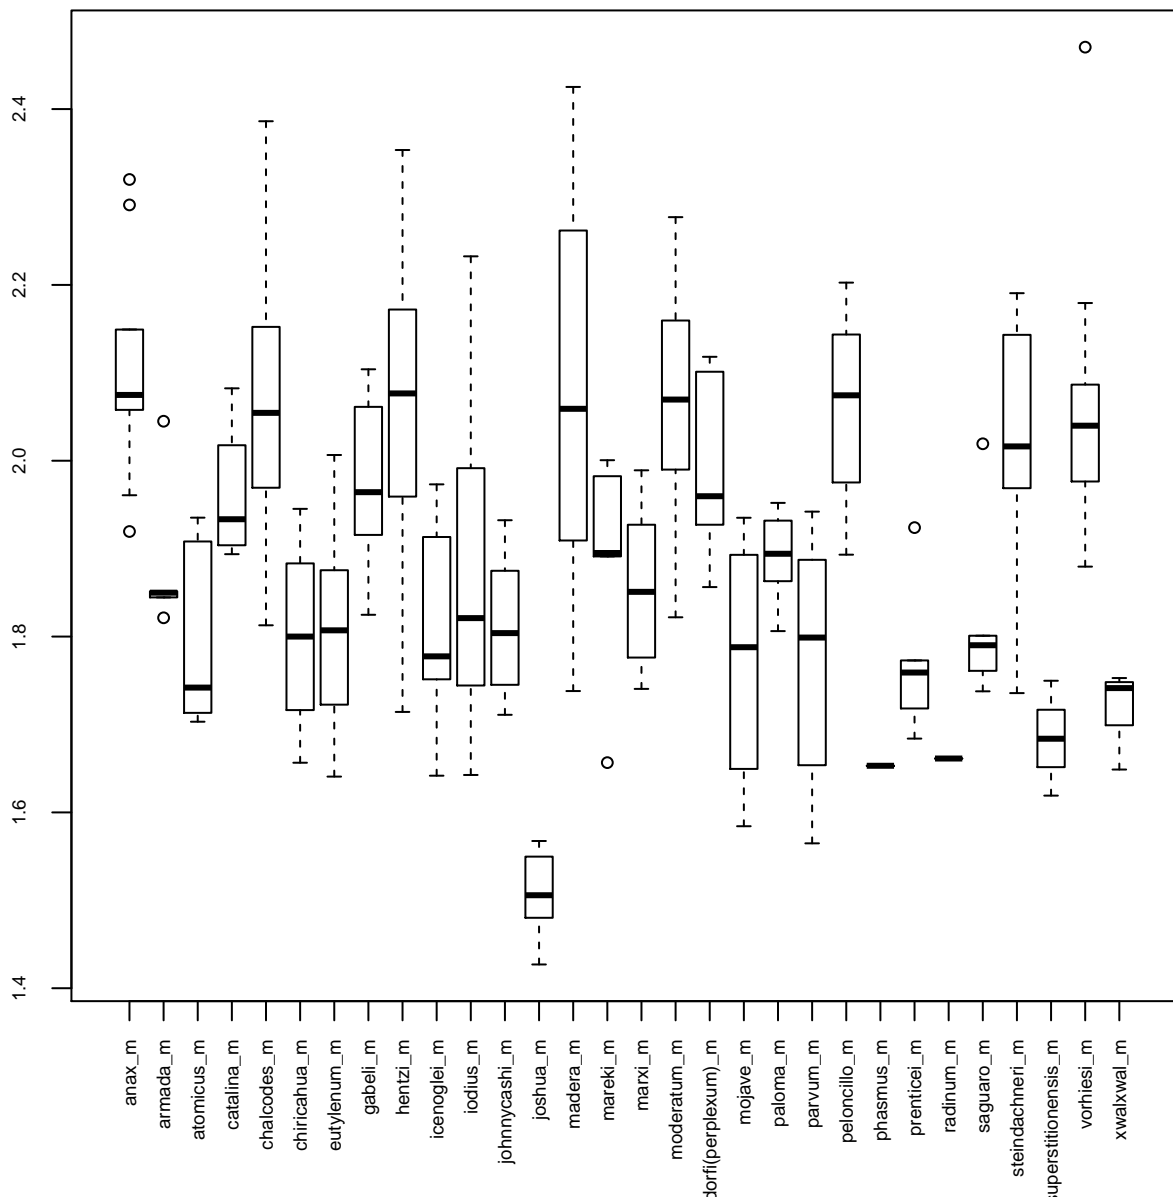

Supplement: Supplementary file 1232

## Tibia 3/Tarsus 3 ratio – males

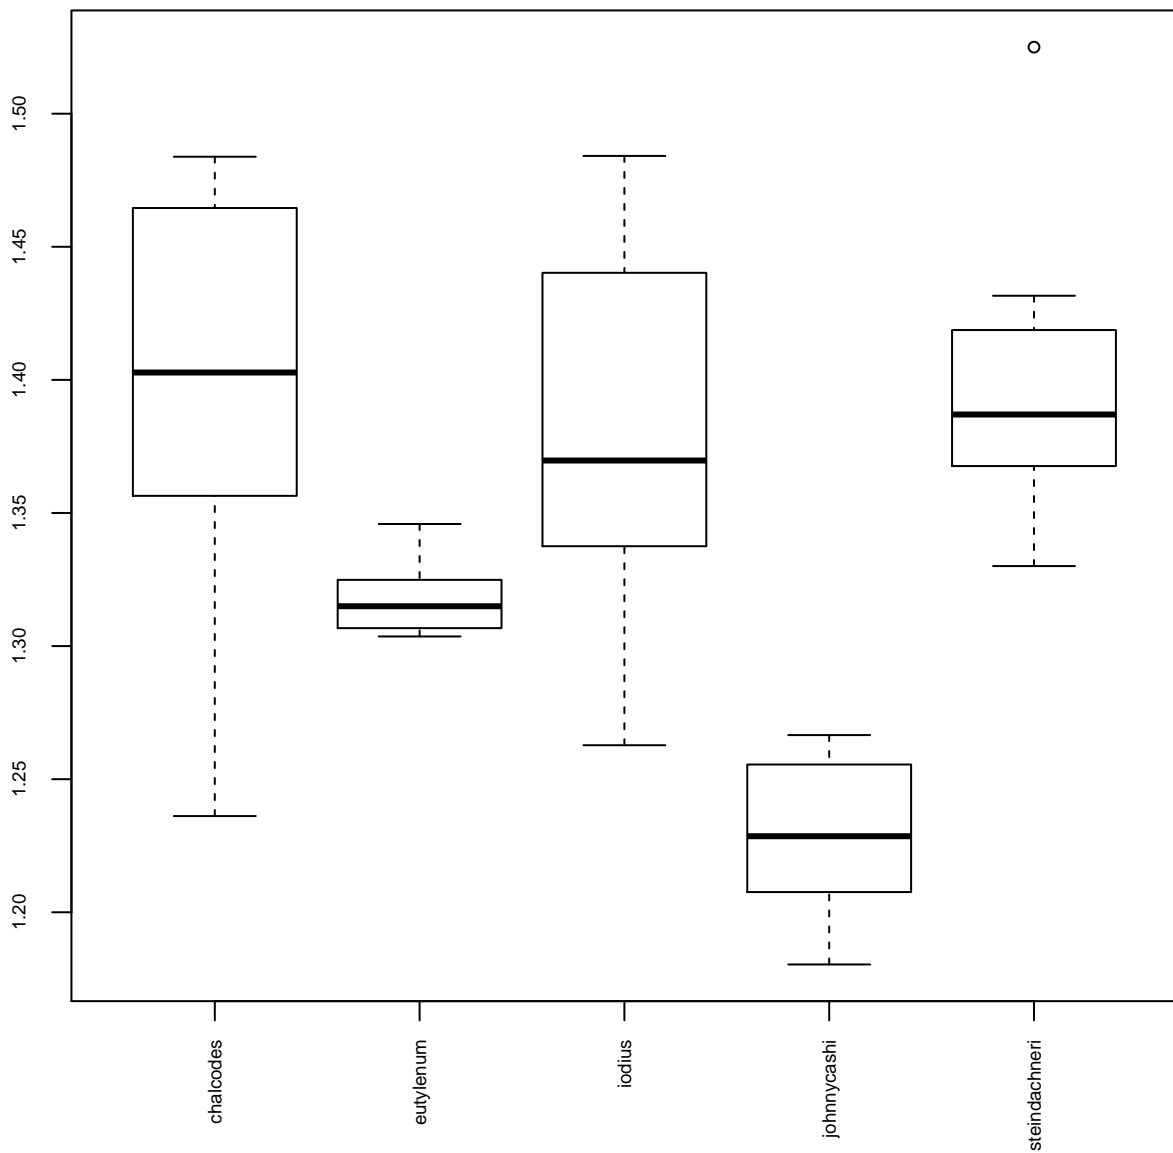

Supplement: Supplementary file 1233

## Patella 1/Metatarsus 1 ratio – females

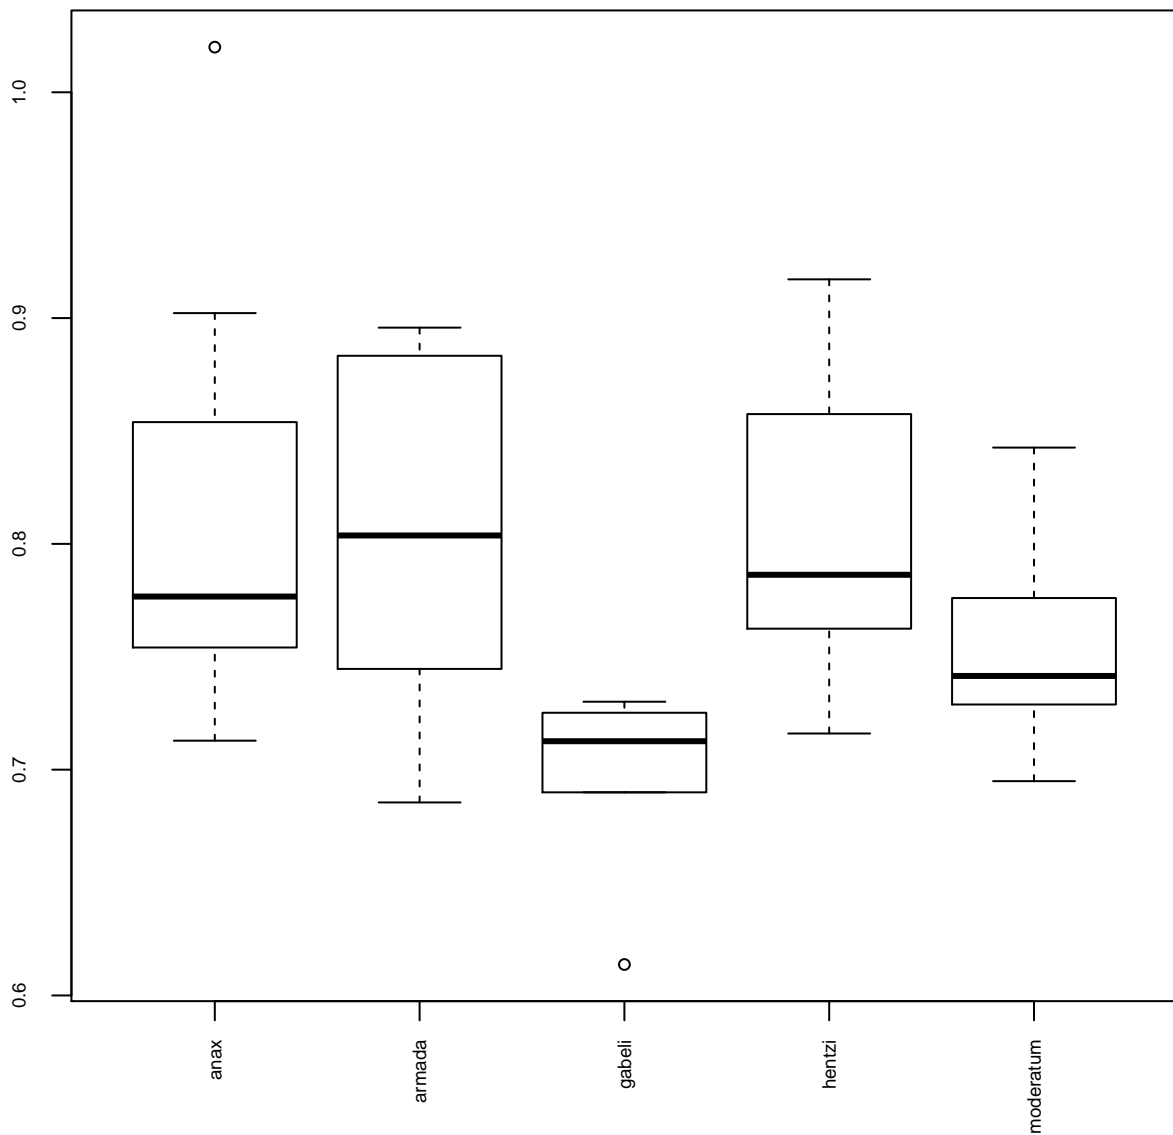

Supplement: Supplementary file 1234

## Labial Length/Width ratio – females

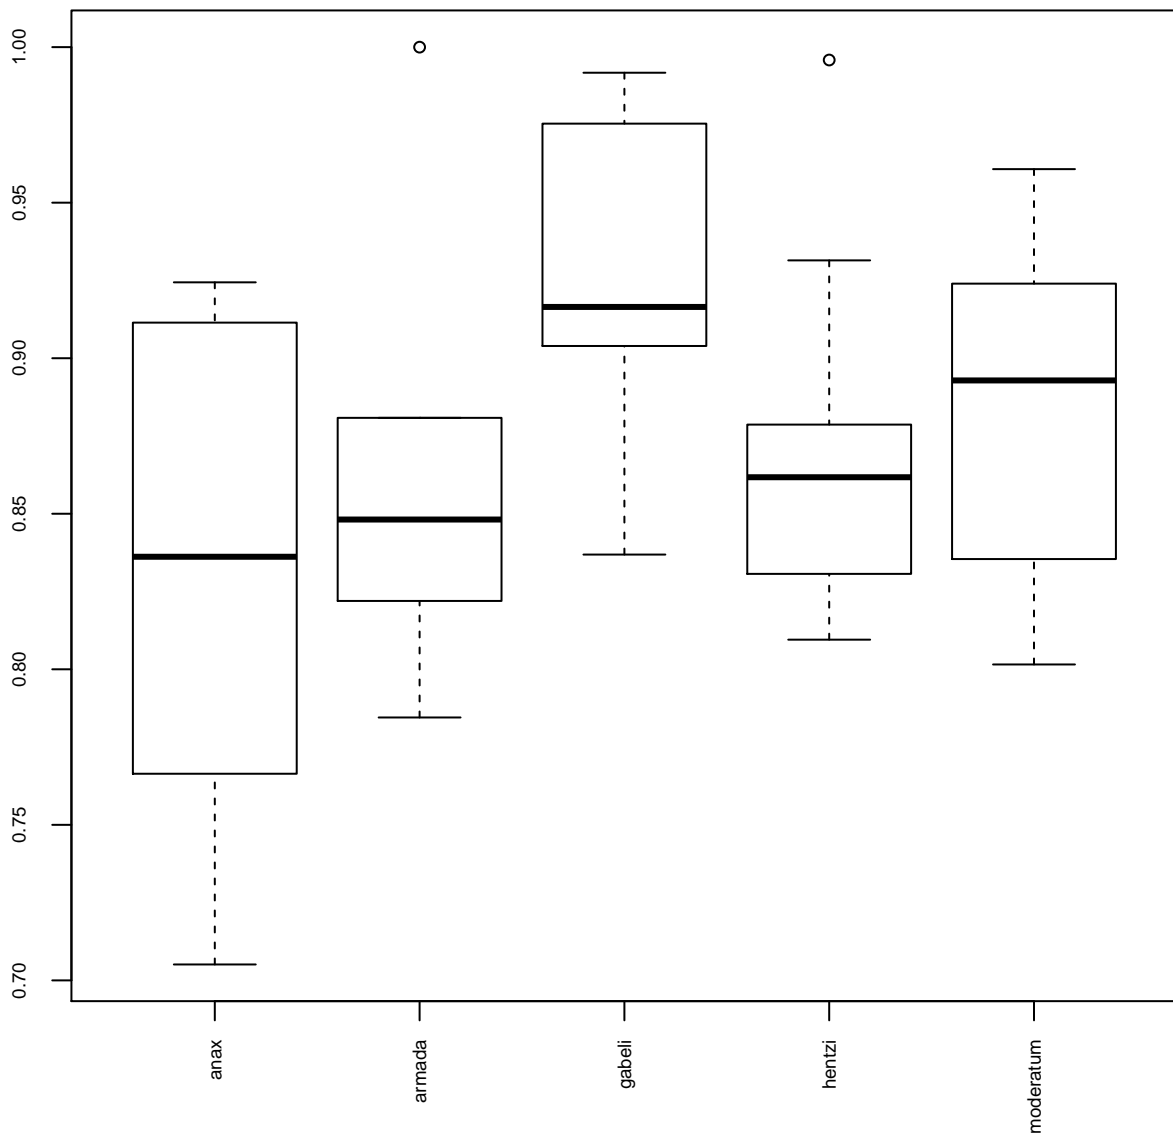

Supplement: Supplementary file 1235

# Metatarsus 1/Patella 3 Length ratio – males

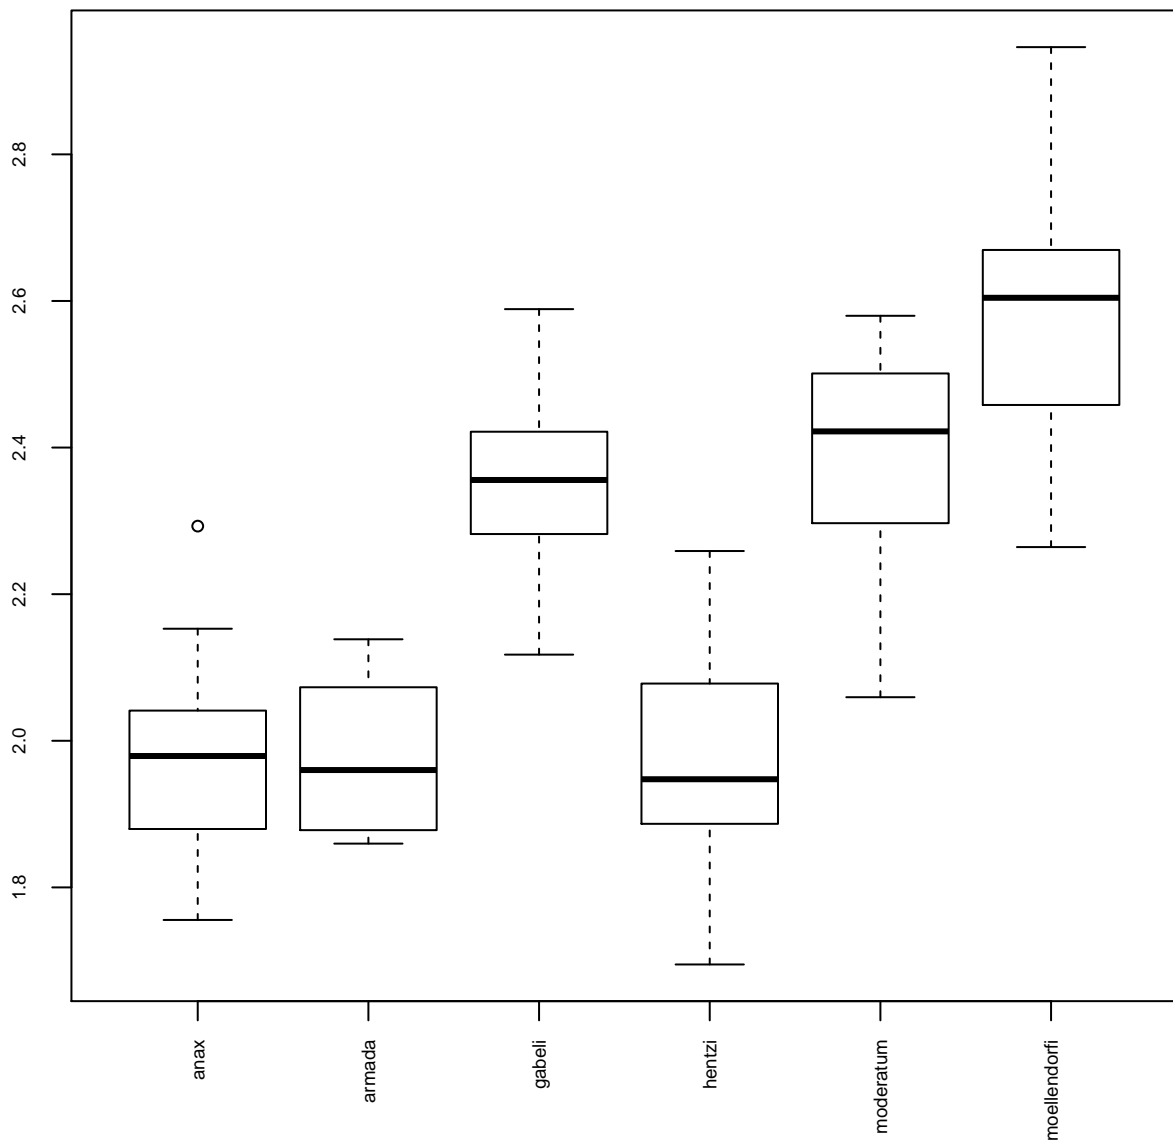

Supplement: Supplementary file 1236

# Metatarsus 1/Femur 3 Length ratio – males

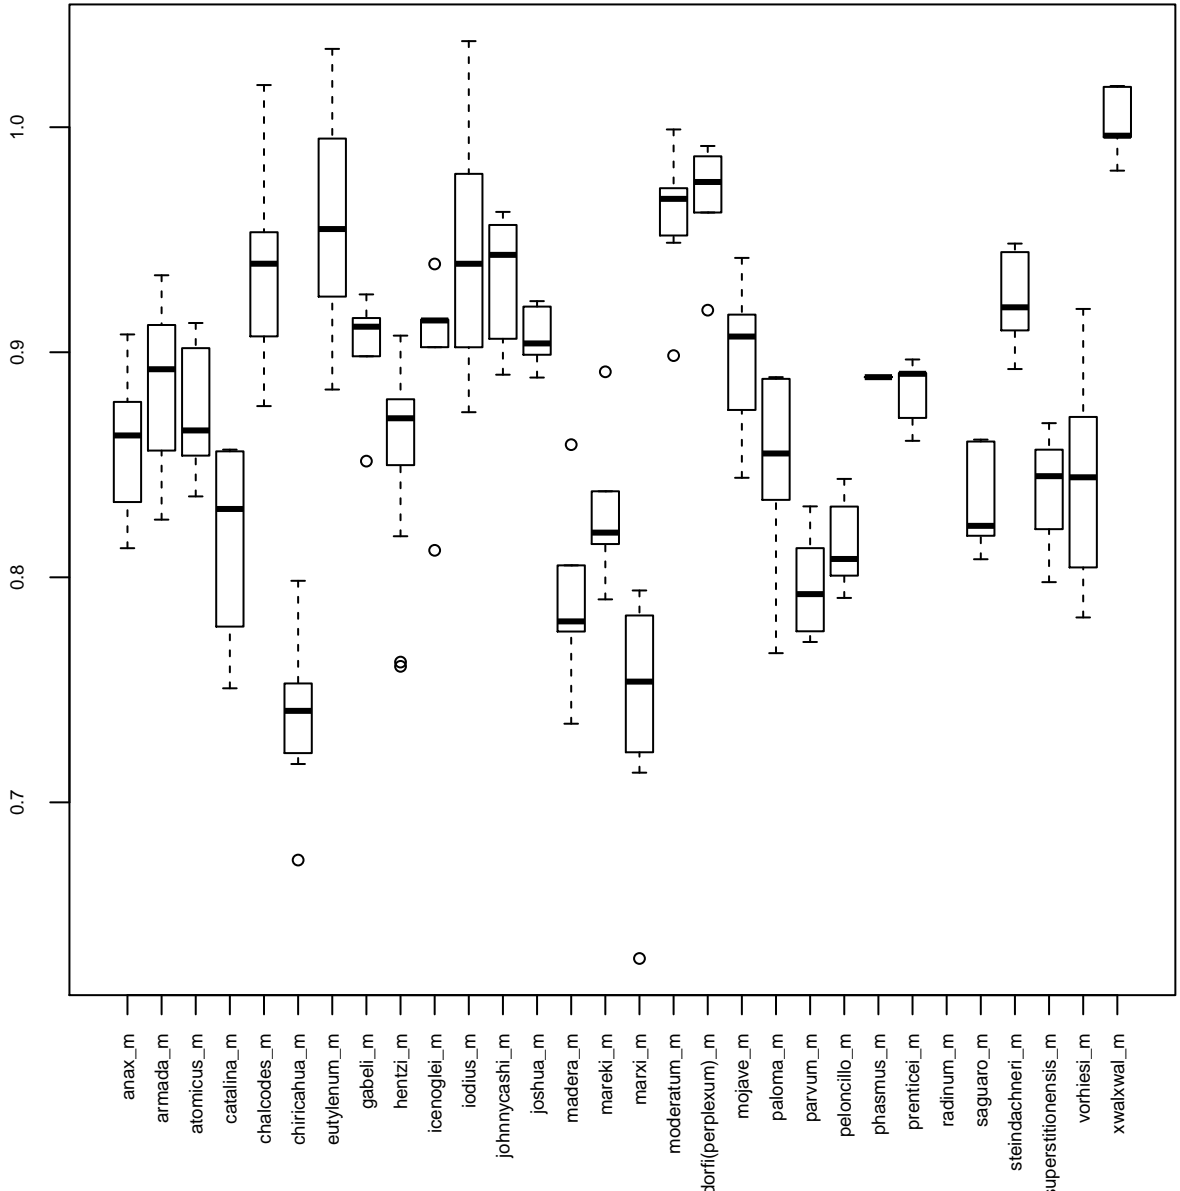

Supplement: Supplementary file 1237

## Palpal Tibia/Tibia 3 Length ratio – males

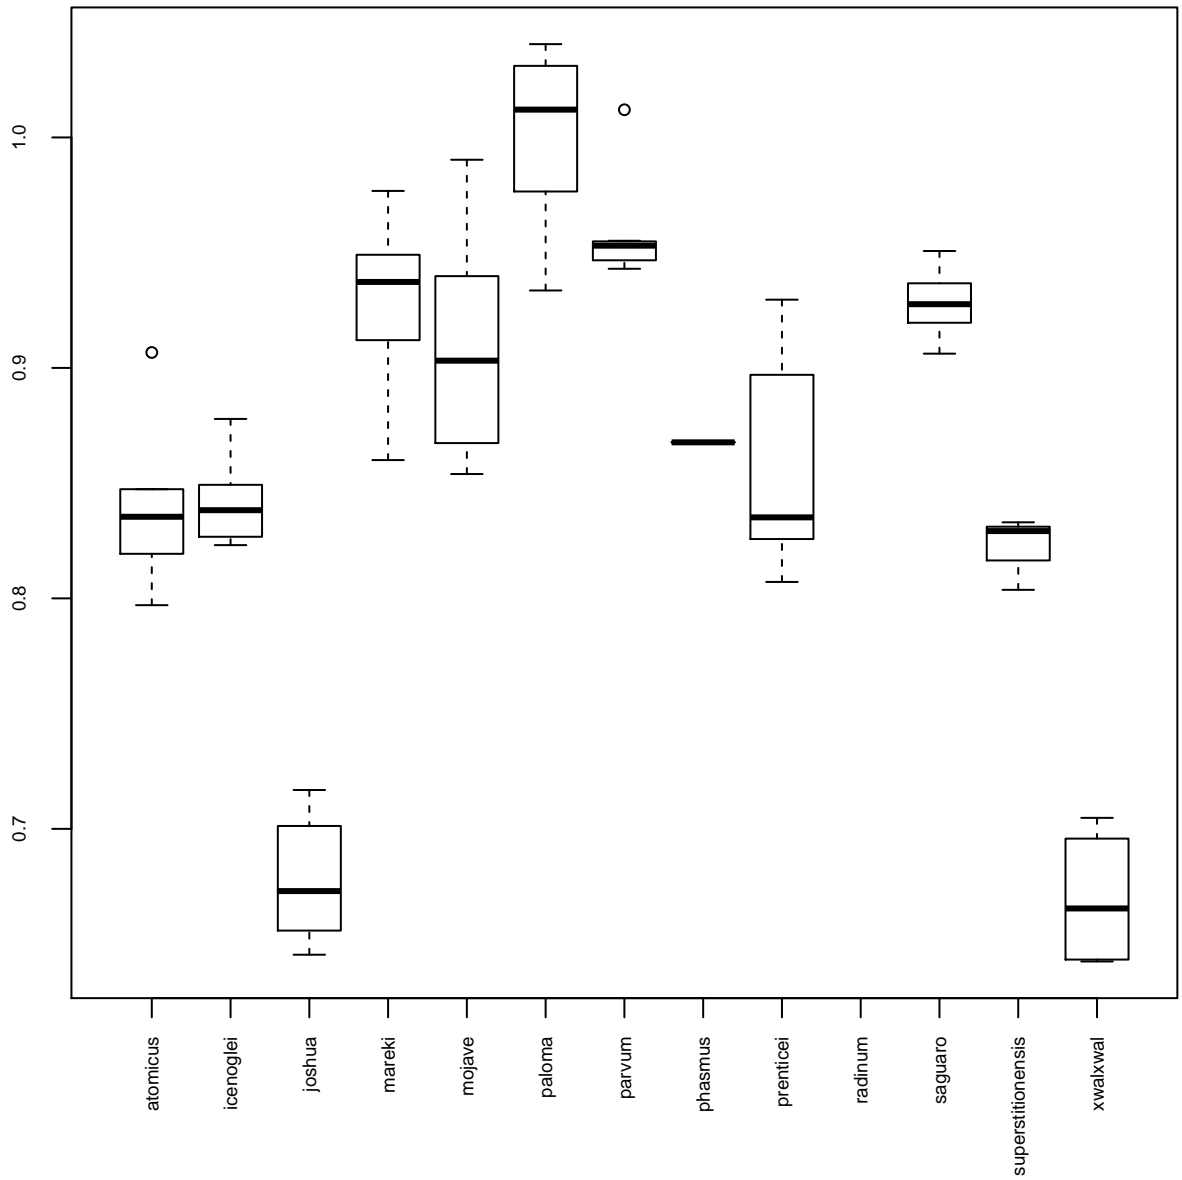

Supplement: Supplementary file 1238

# Patella 1/Patella 3 ratio – males

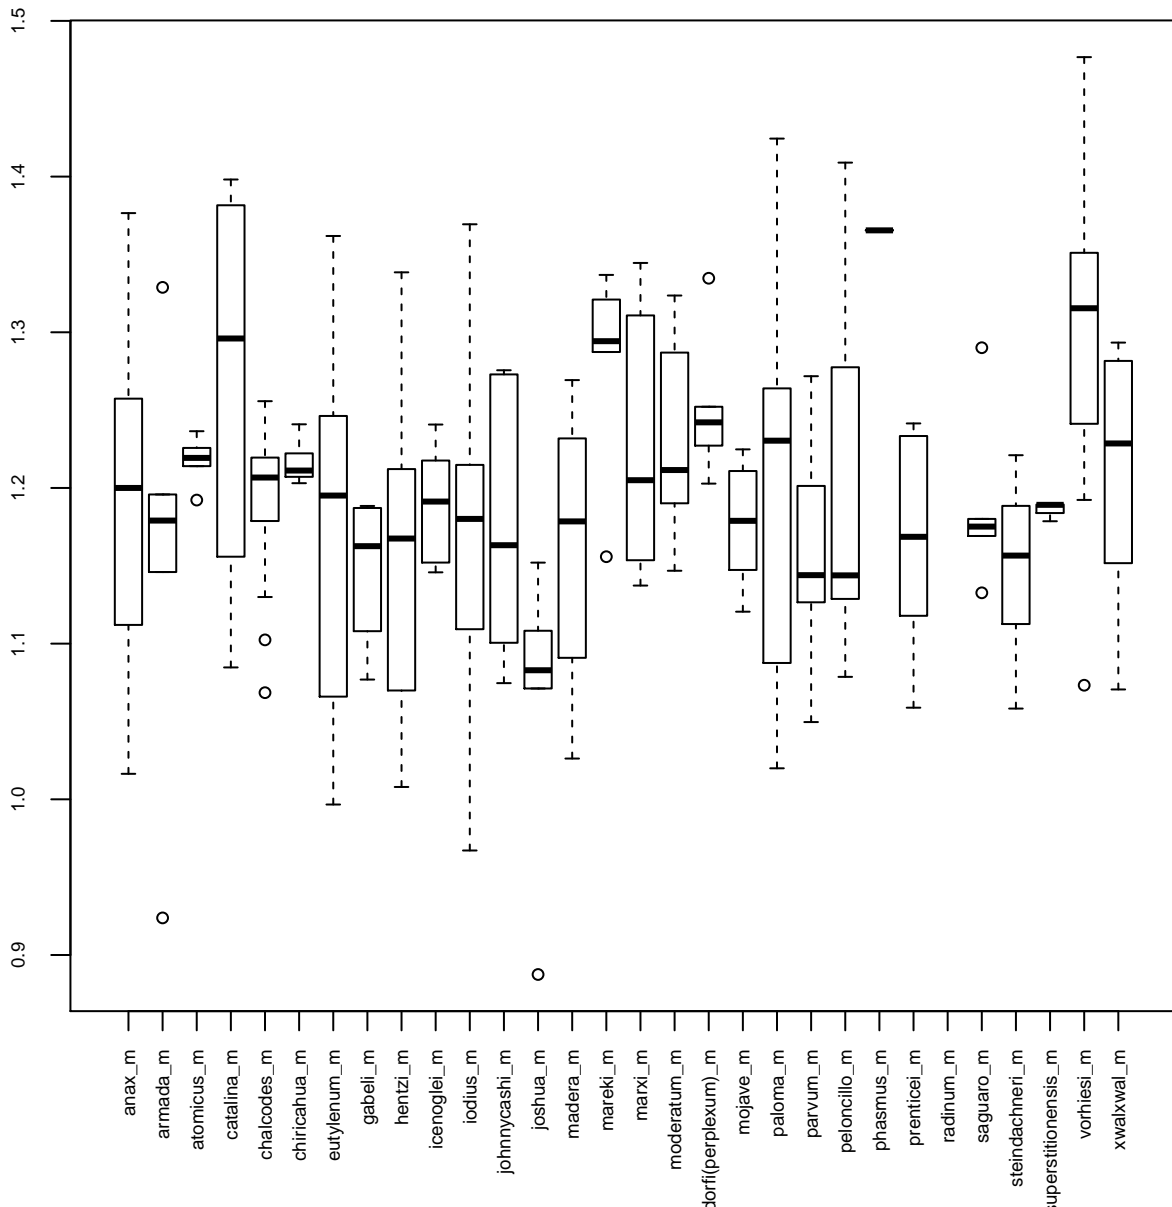

Supplement: Supplementary file 1239

## Tarsus 3/Tibia 4 Length ratio – females

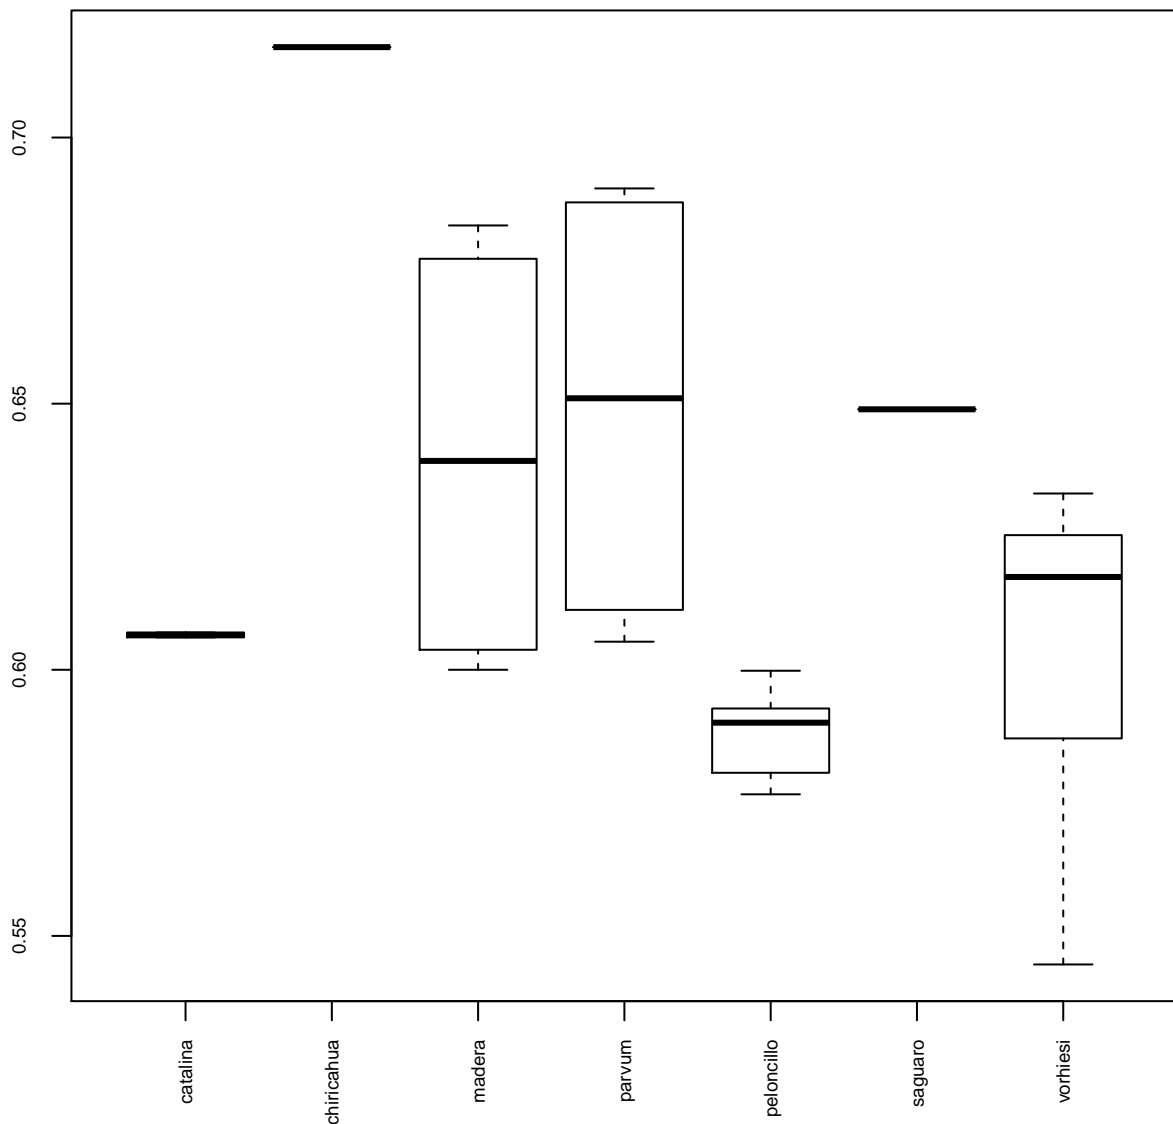

Supplement: Supplementary file 1240

## Tibia 3/Patella 4 Length ratio – females

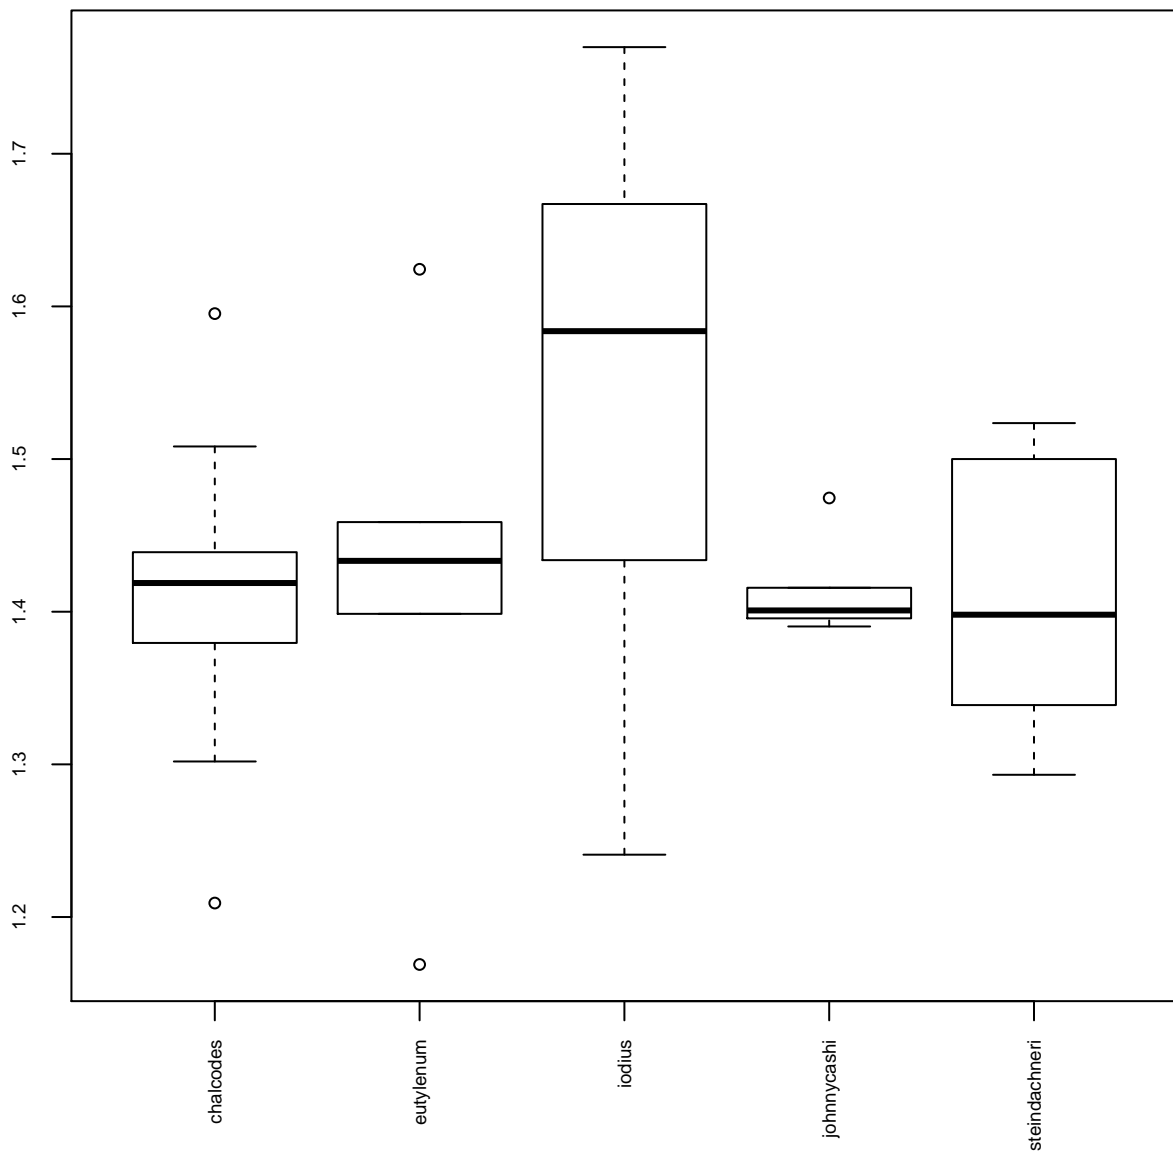

Supplement: Supplementary file 1241

## Femur 3/Tarsus 4 Length ratio – males

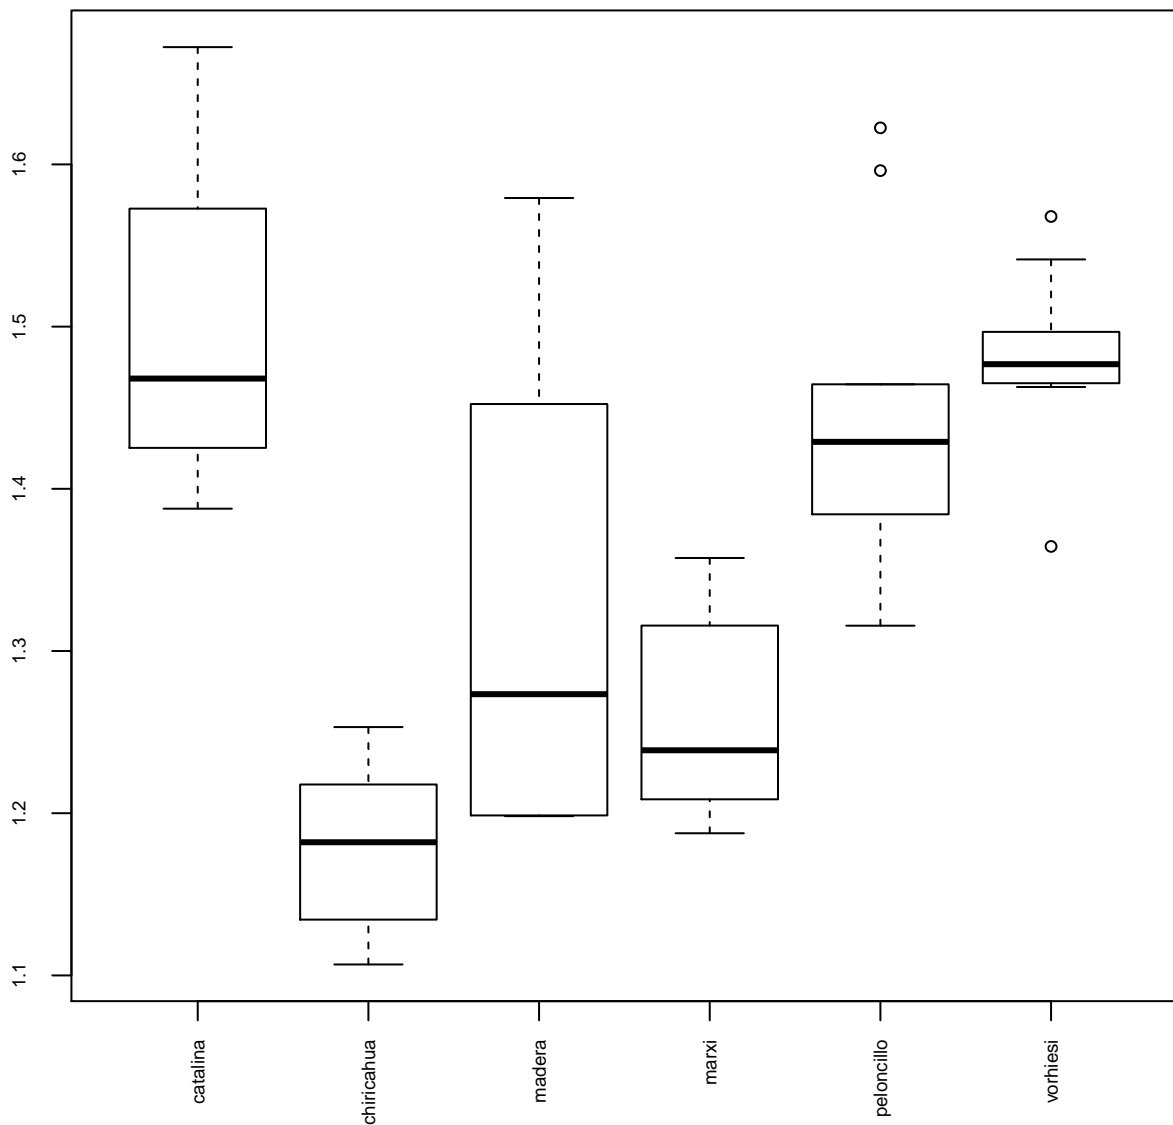

Supplement: Supplementary file 1242

## Tibia 3/Femur 4 Length ratio – males

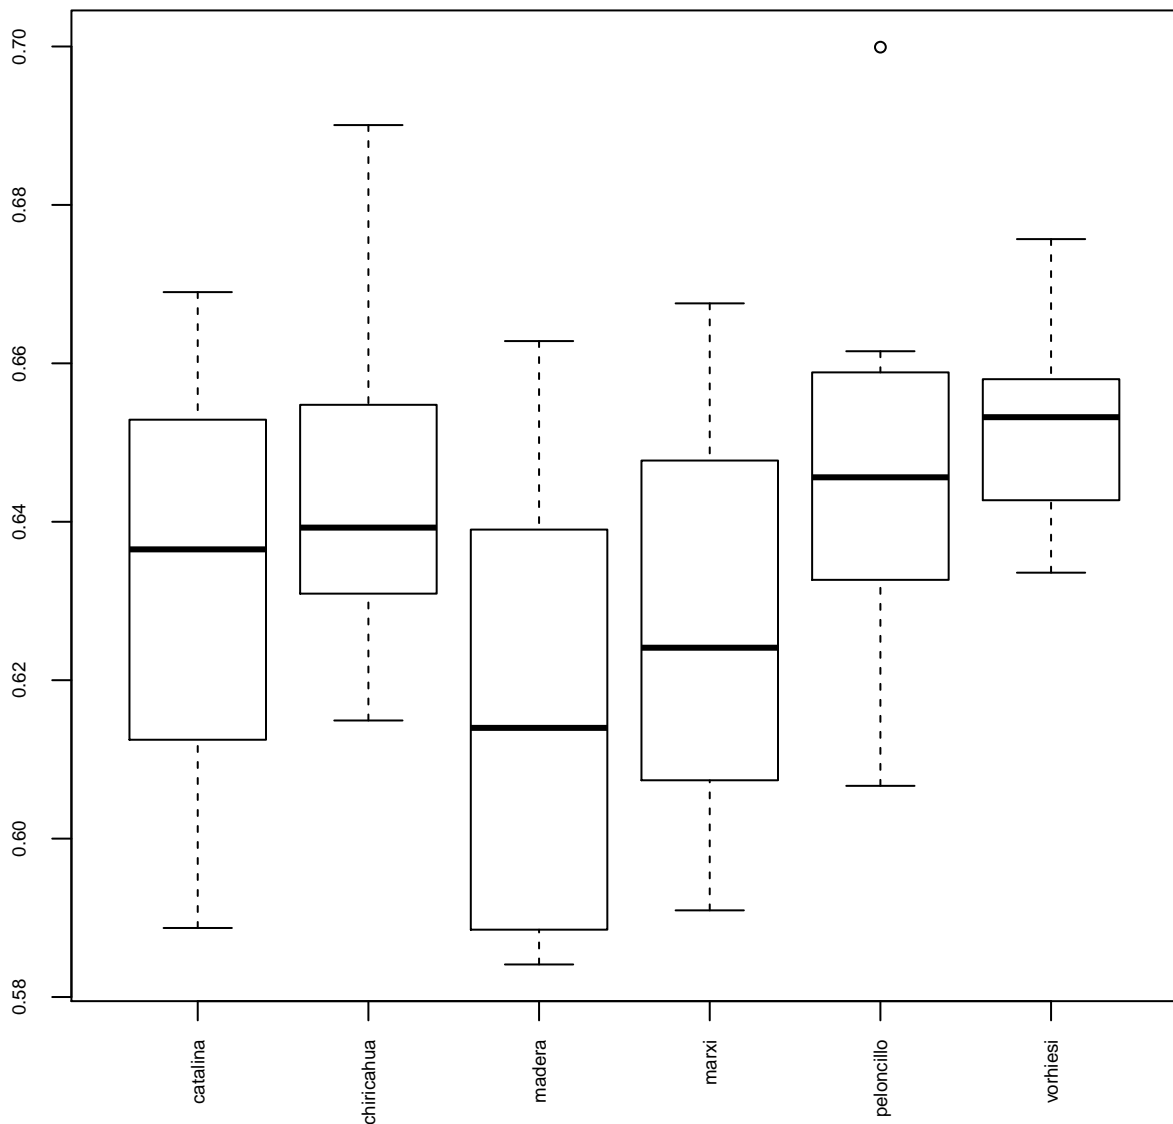

Supplement: Supplementary file 1243

## Tibia 1/Tibia 4 ratio – females

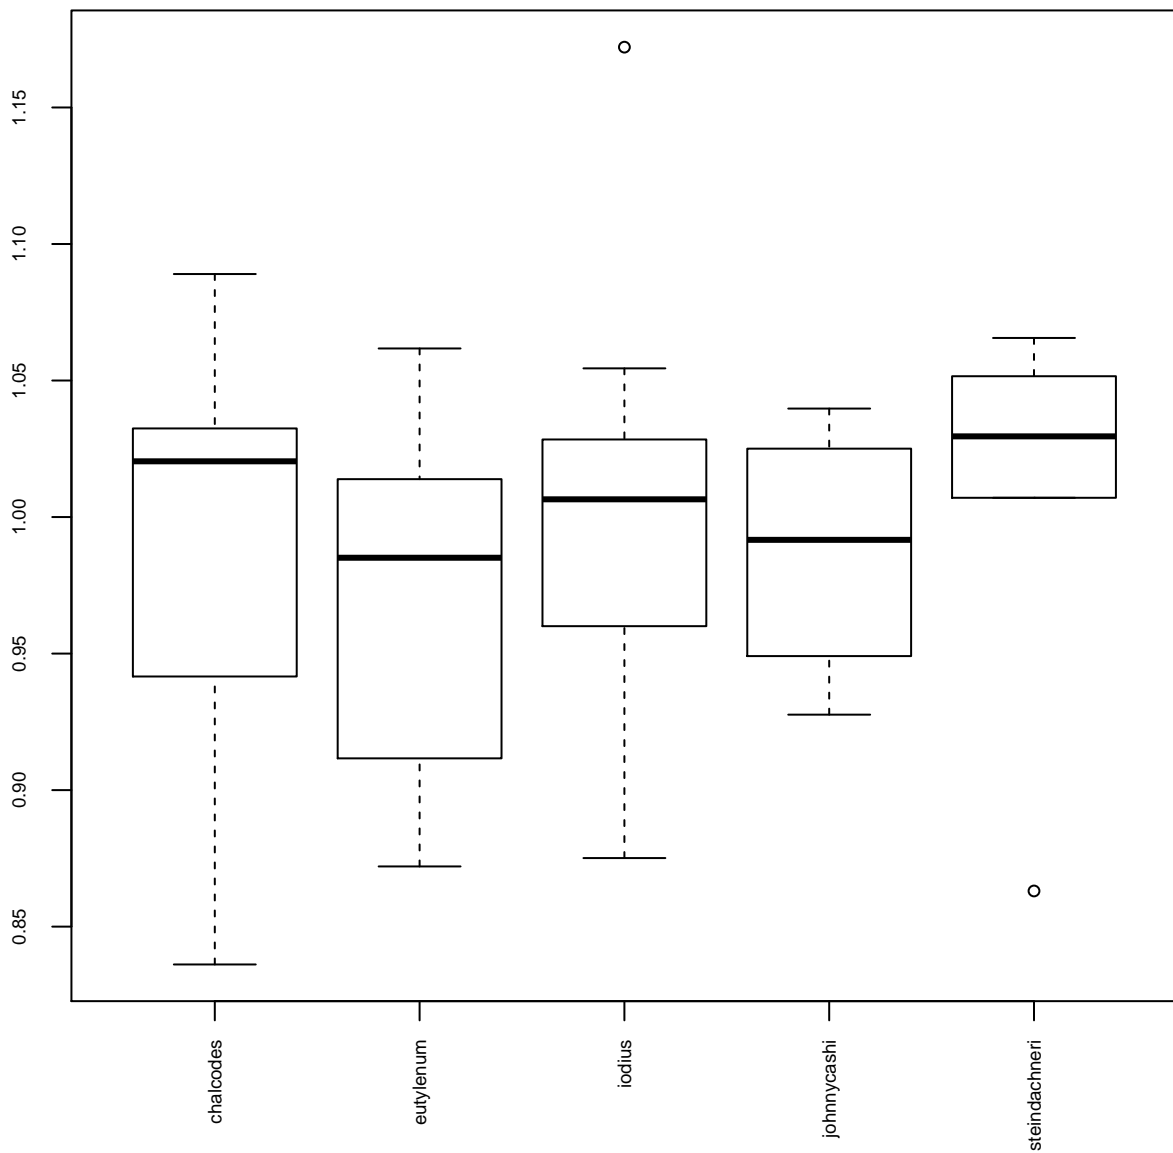

Supplement: Supplementary file 1244

## Tibia 3/Metatarsus 3 ratio – females

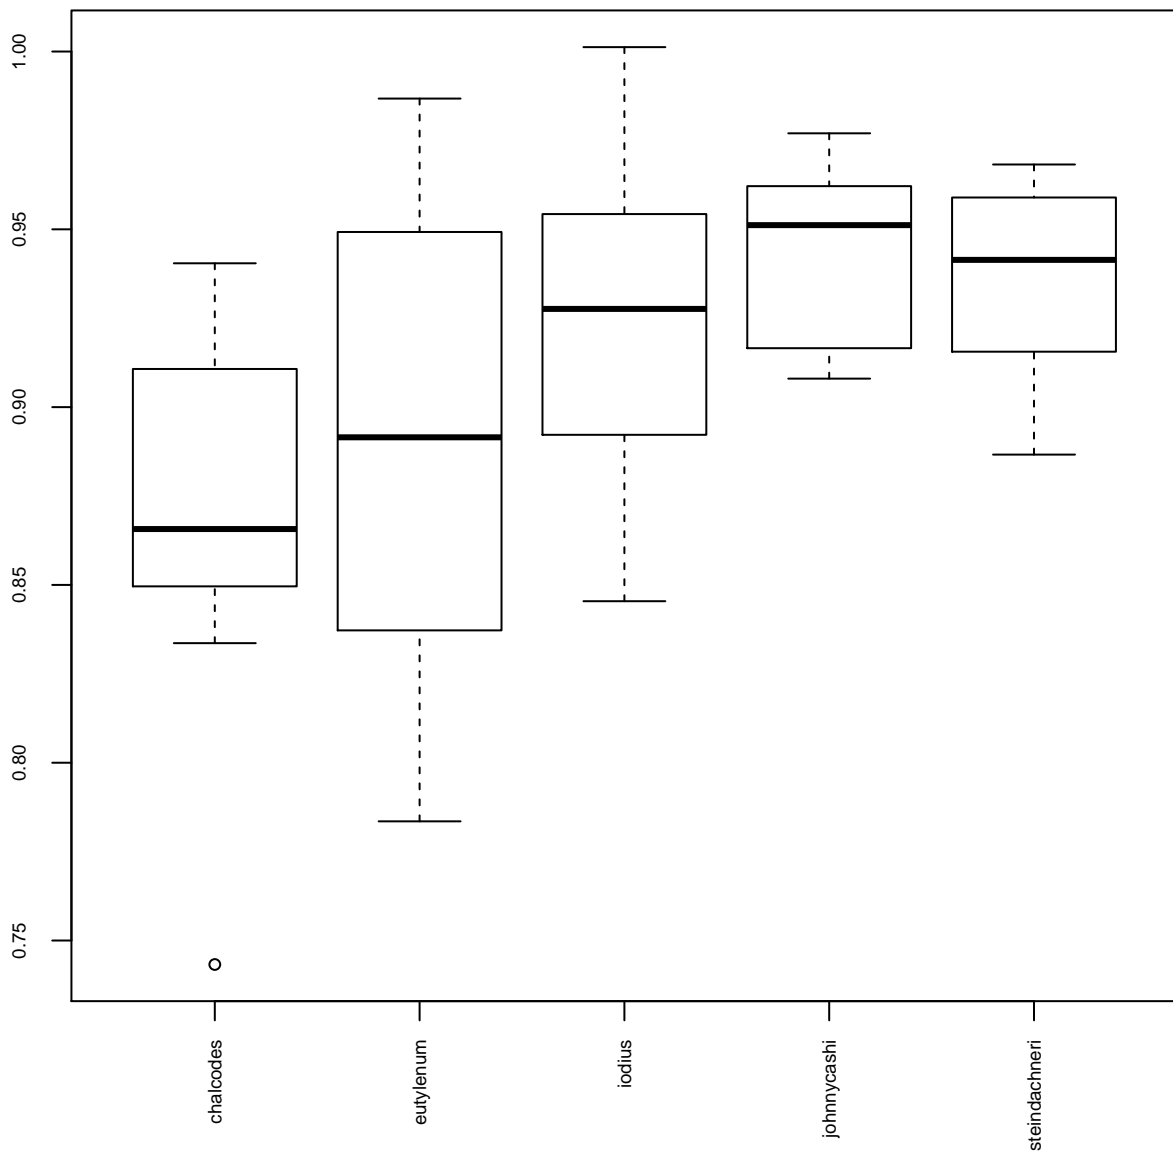

Supplement: Supplementary file 1245

## Carapace Length/Palpal Tibia Length ratio – males

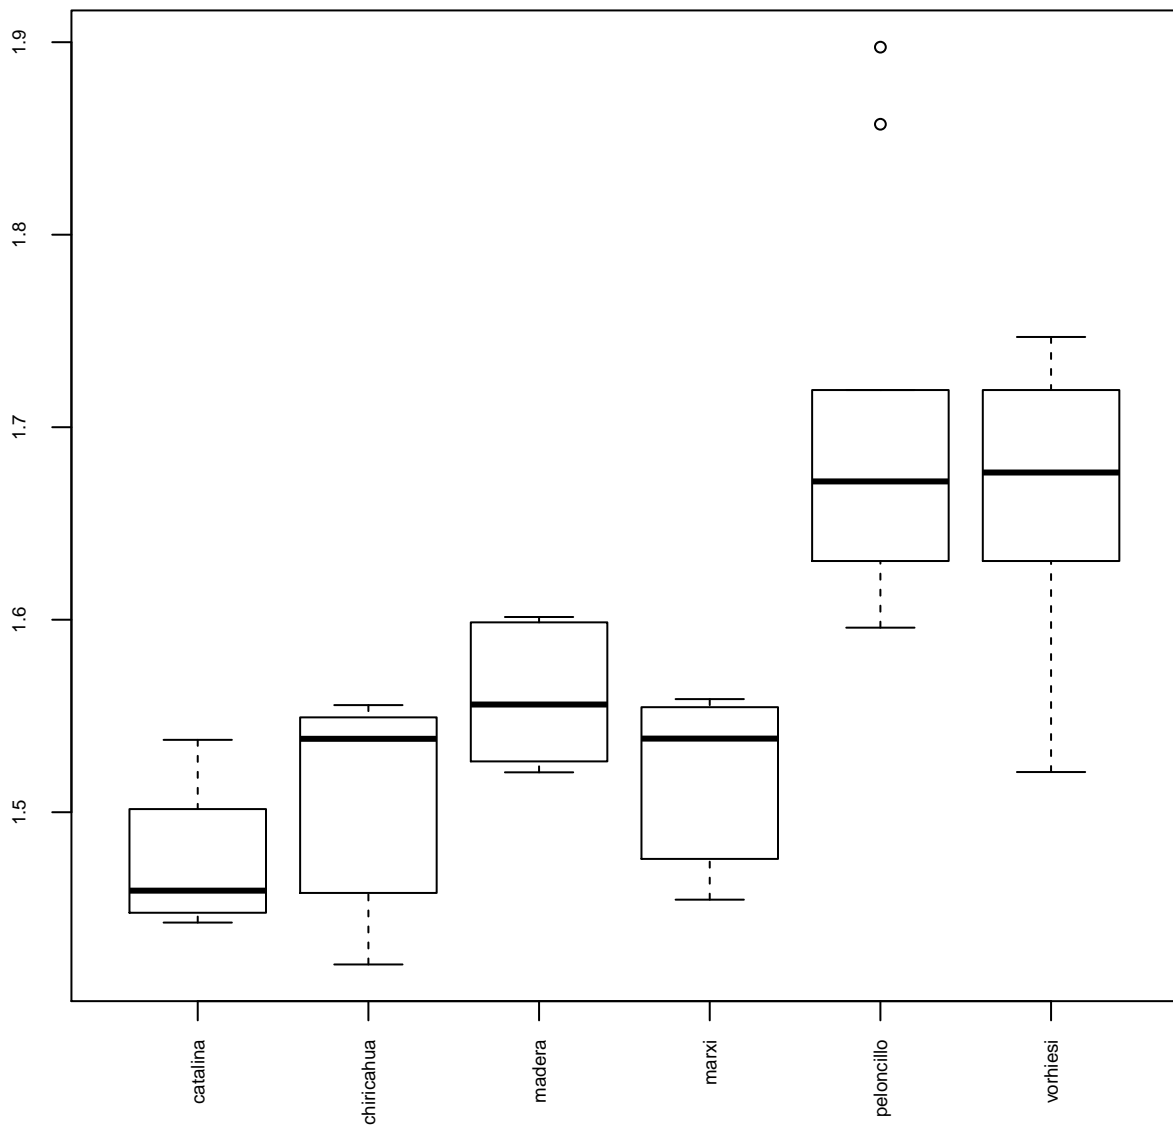

Supplement: Supplementary file 1246

## Femur 3 Length/Width ratio – males

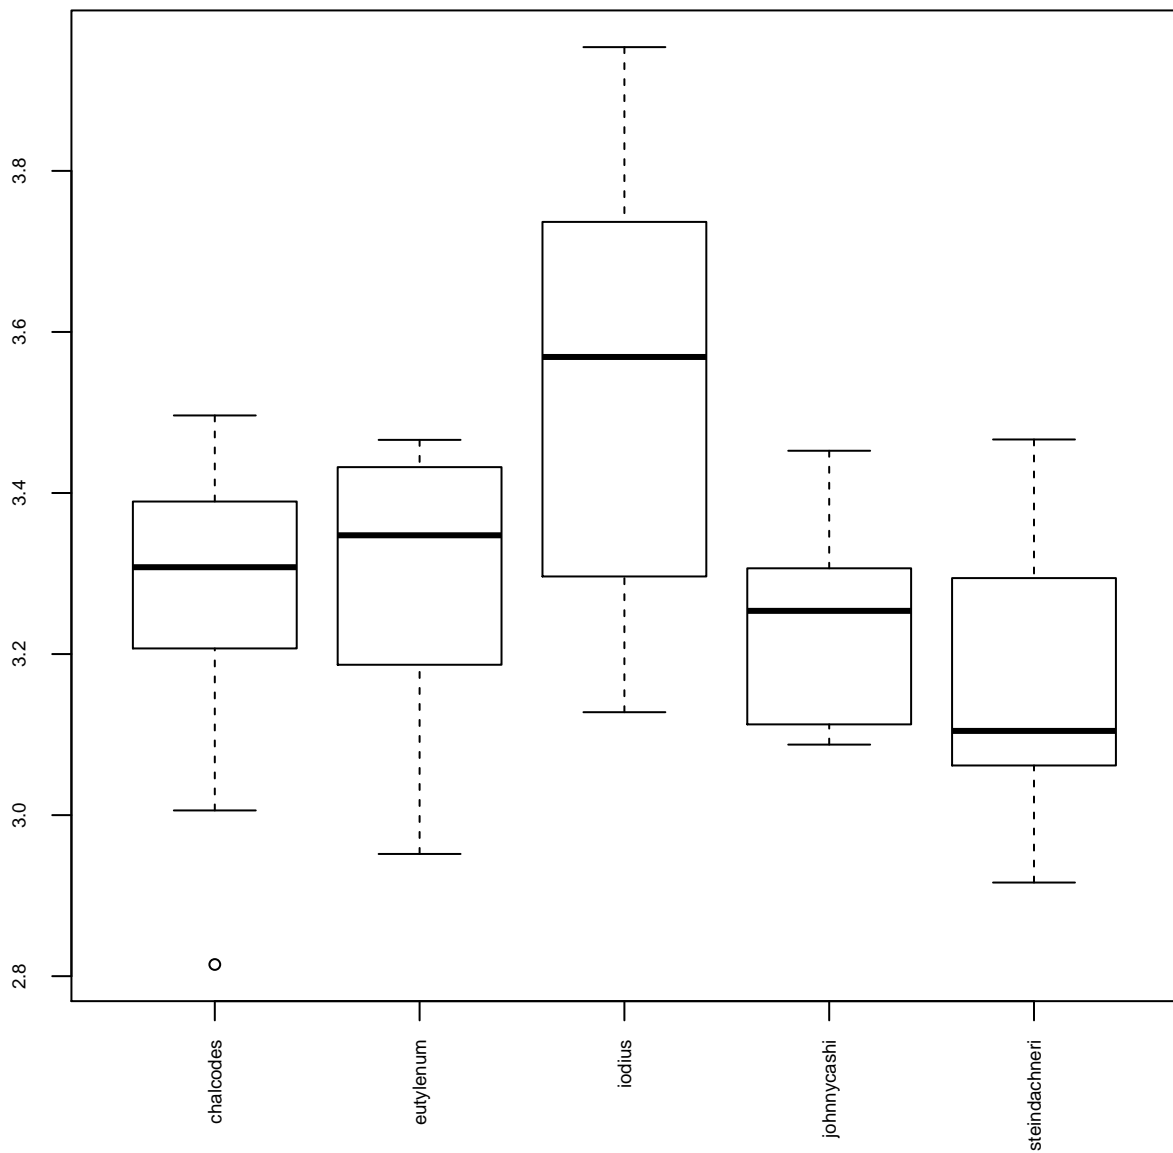

Supplement: Supplementary file 1247

# Tibia 1/Metatarsus 1 ratio – males

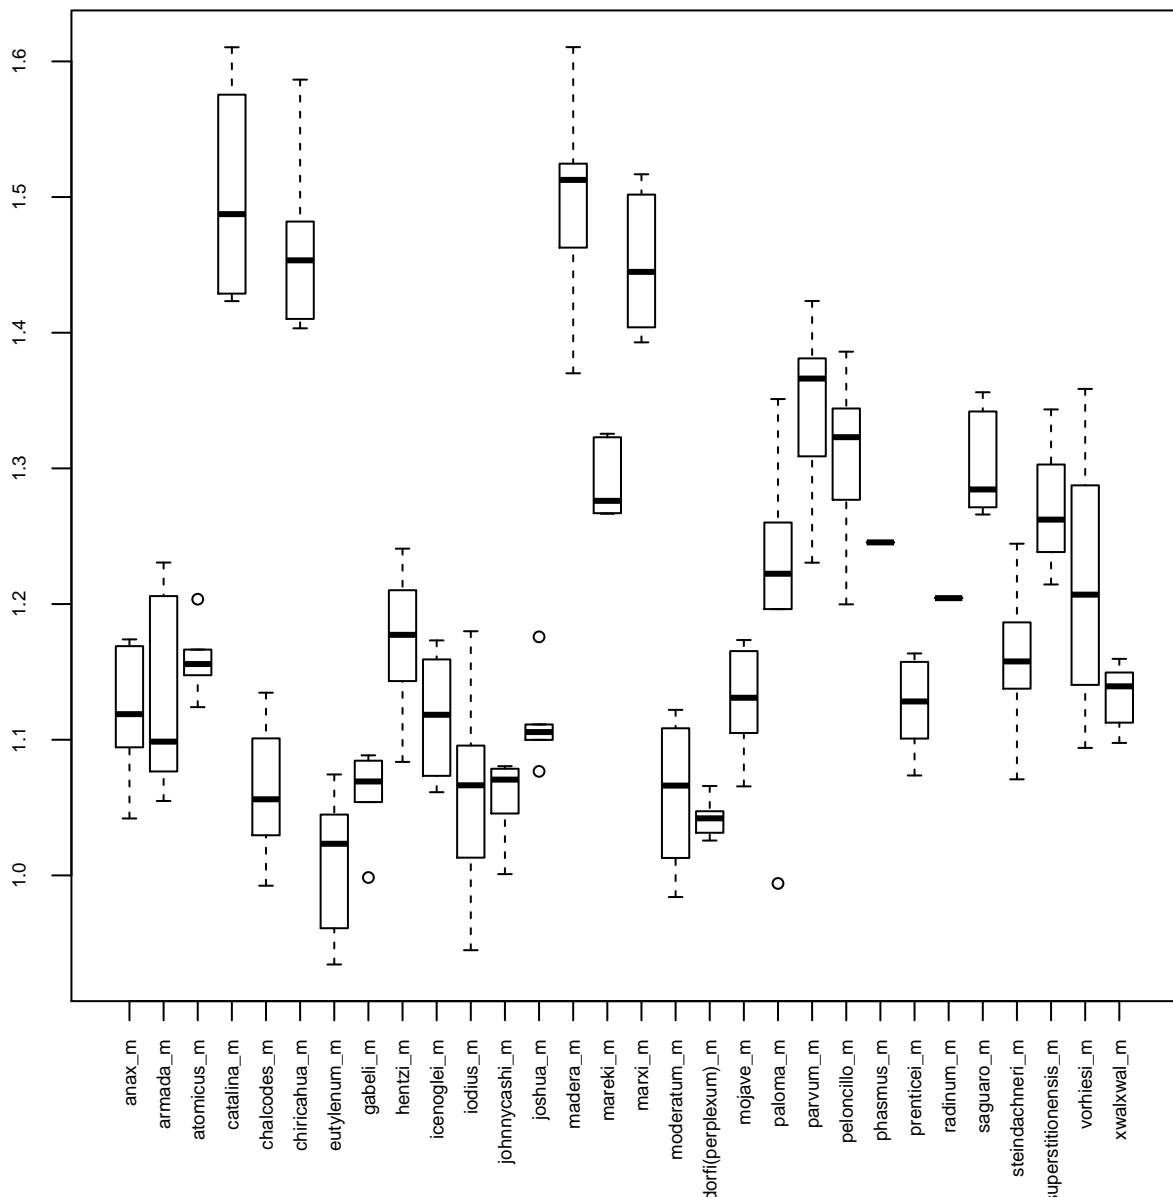

Supplement: Supplementary file 1248

## Tibia 1/Tarsus 4 Length ratio – females

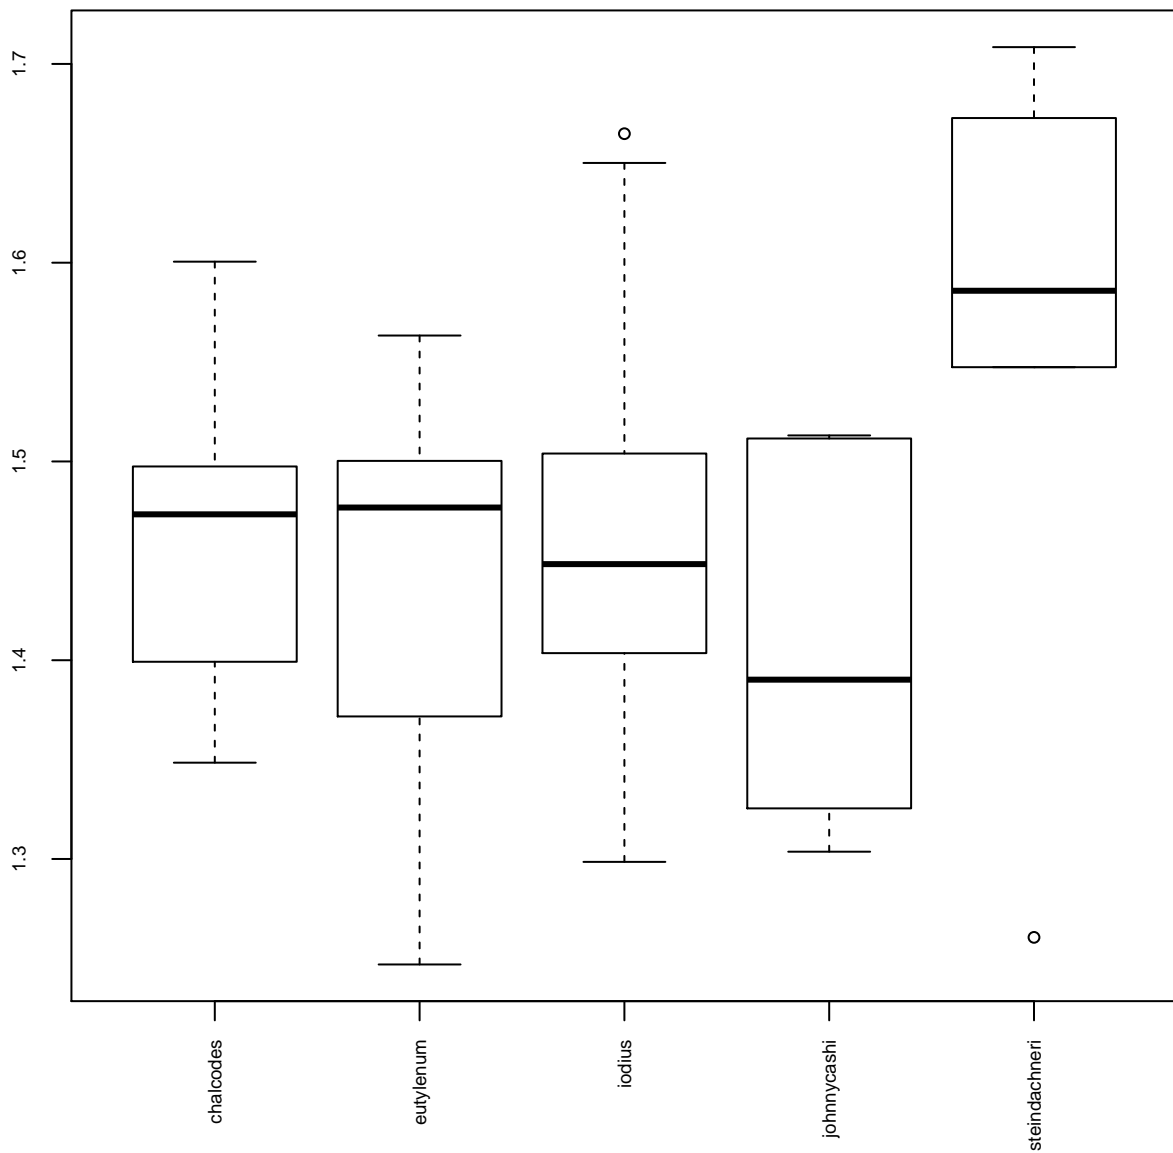

Supplement: Supplementary file 1249

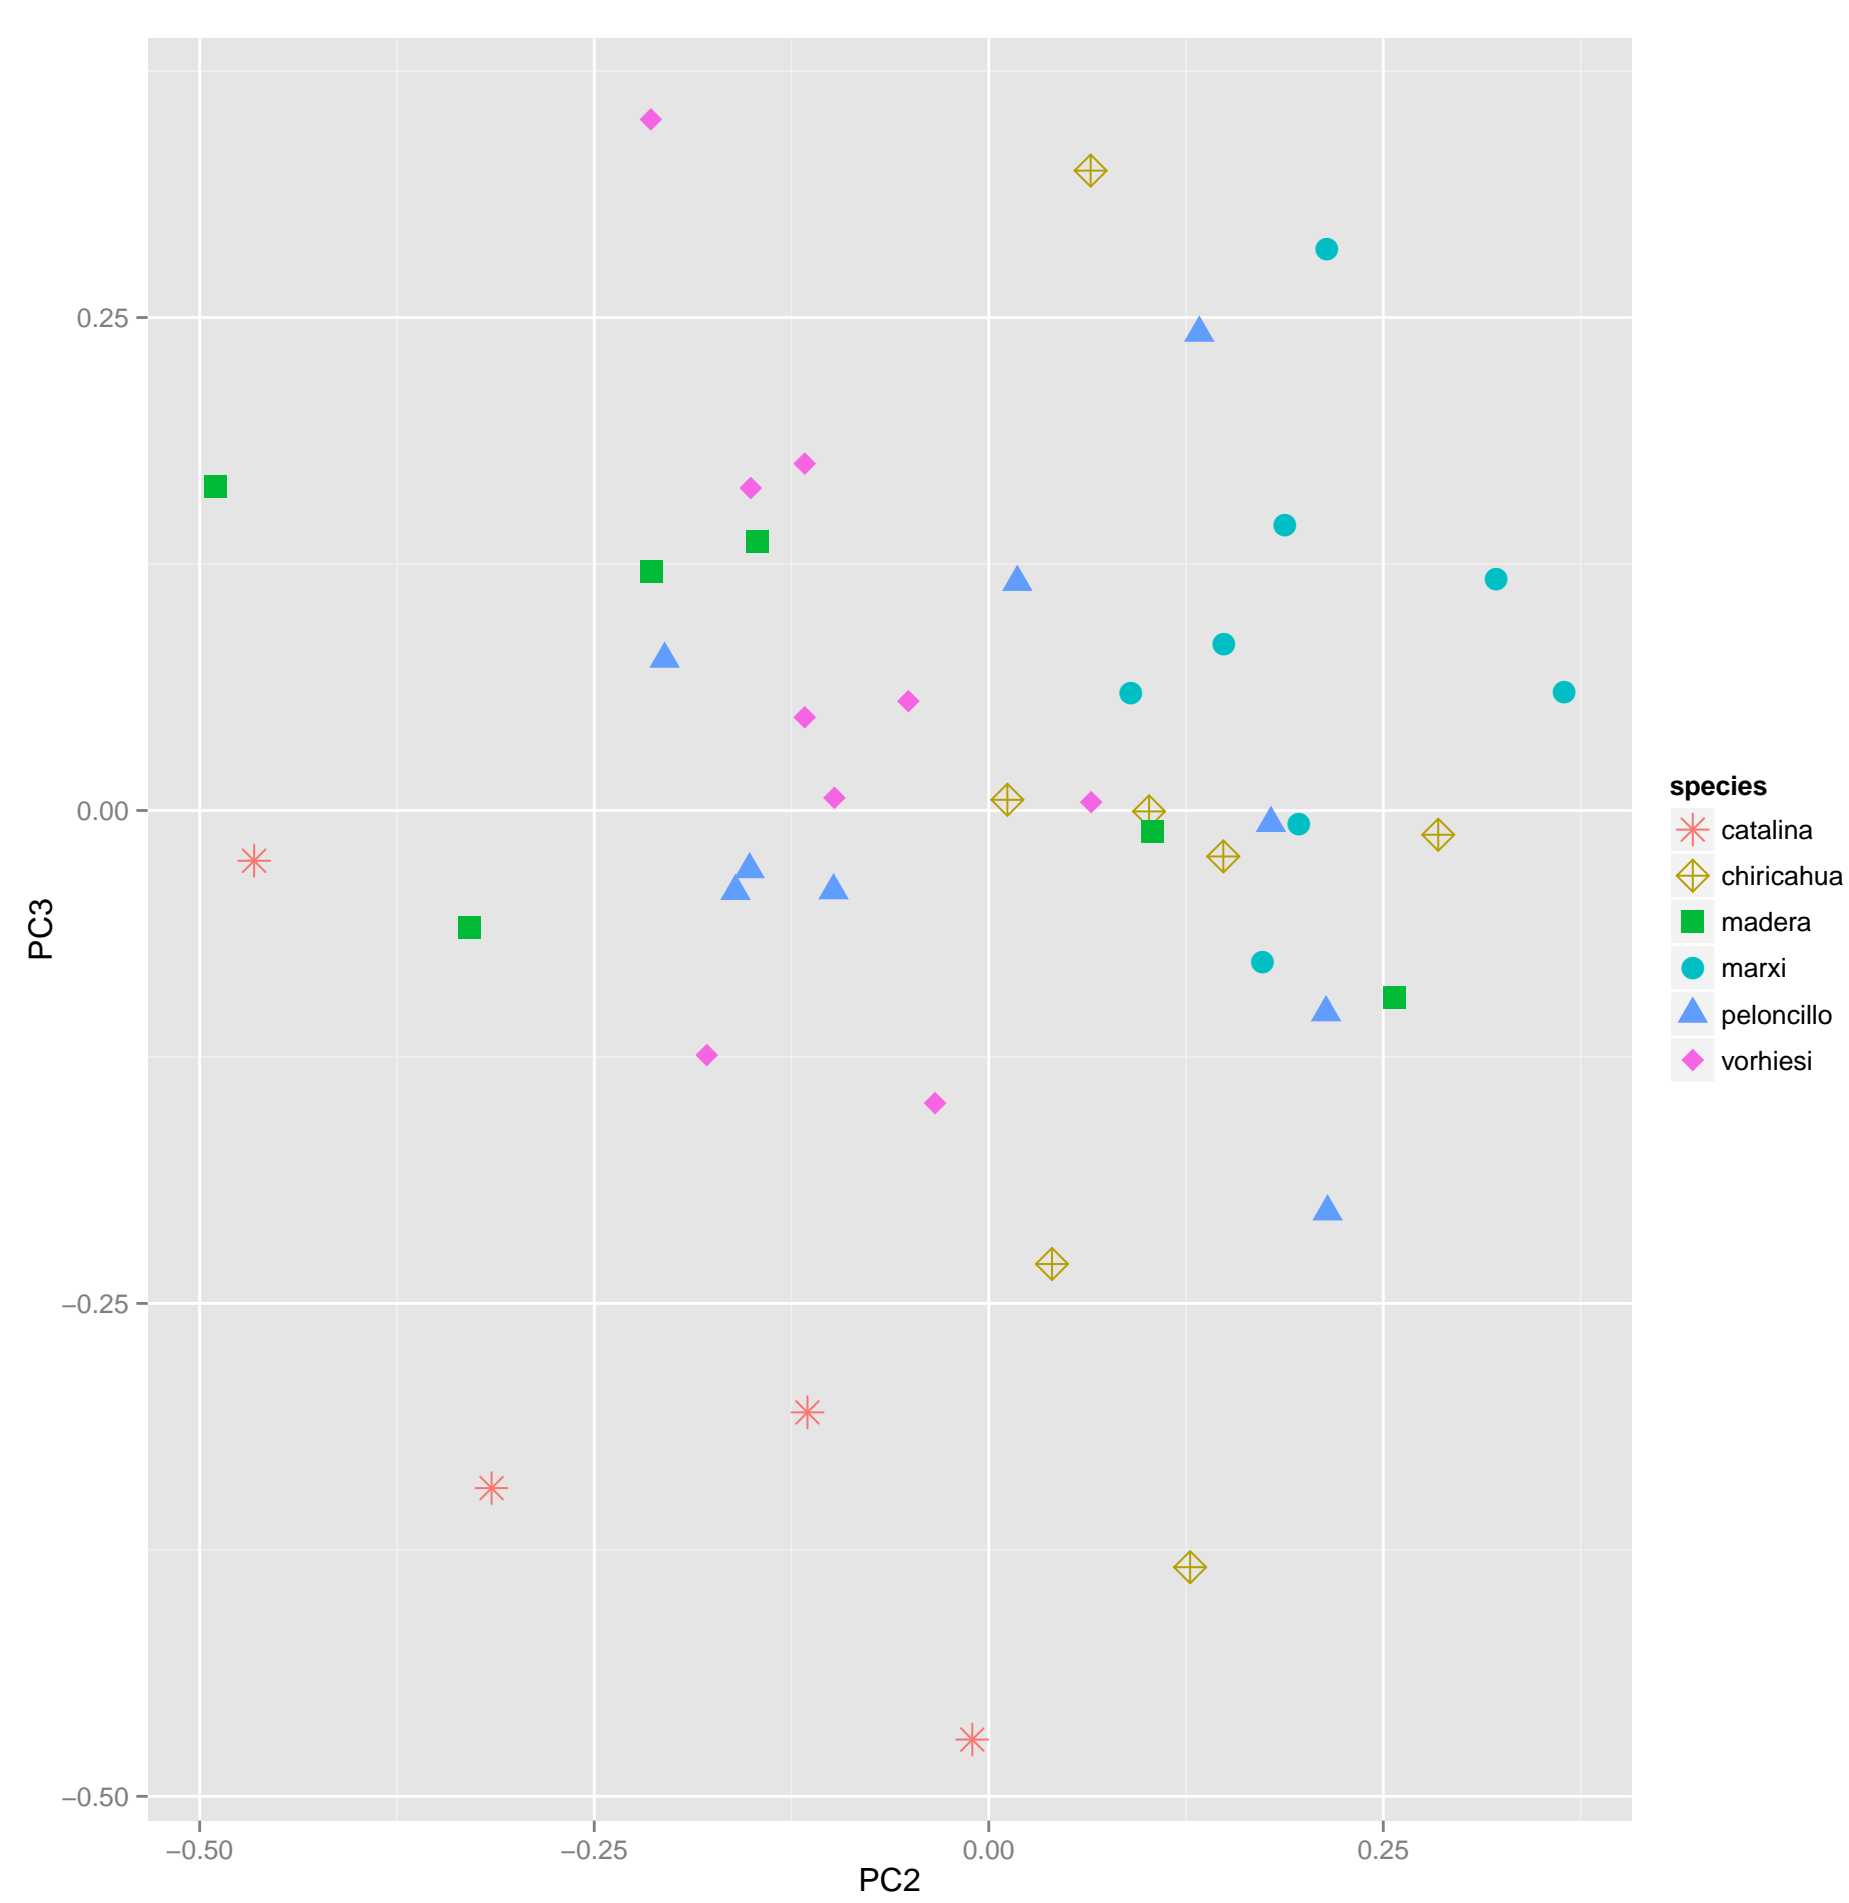

Supplement: Supplementary file 1250

## Metatarsus 1/Tarsus 4 Length ratio – females

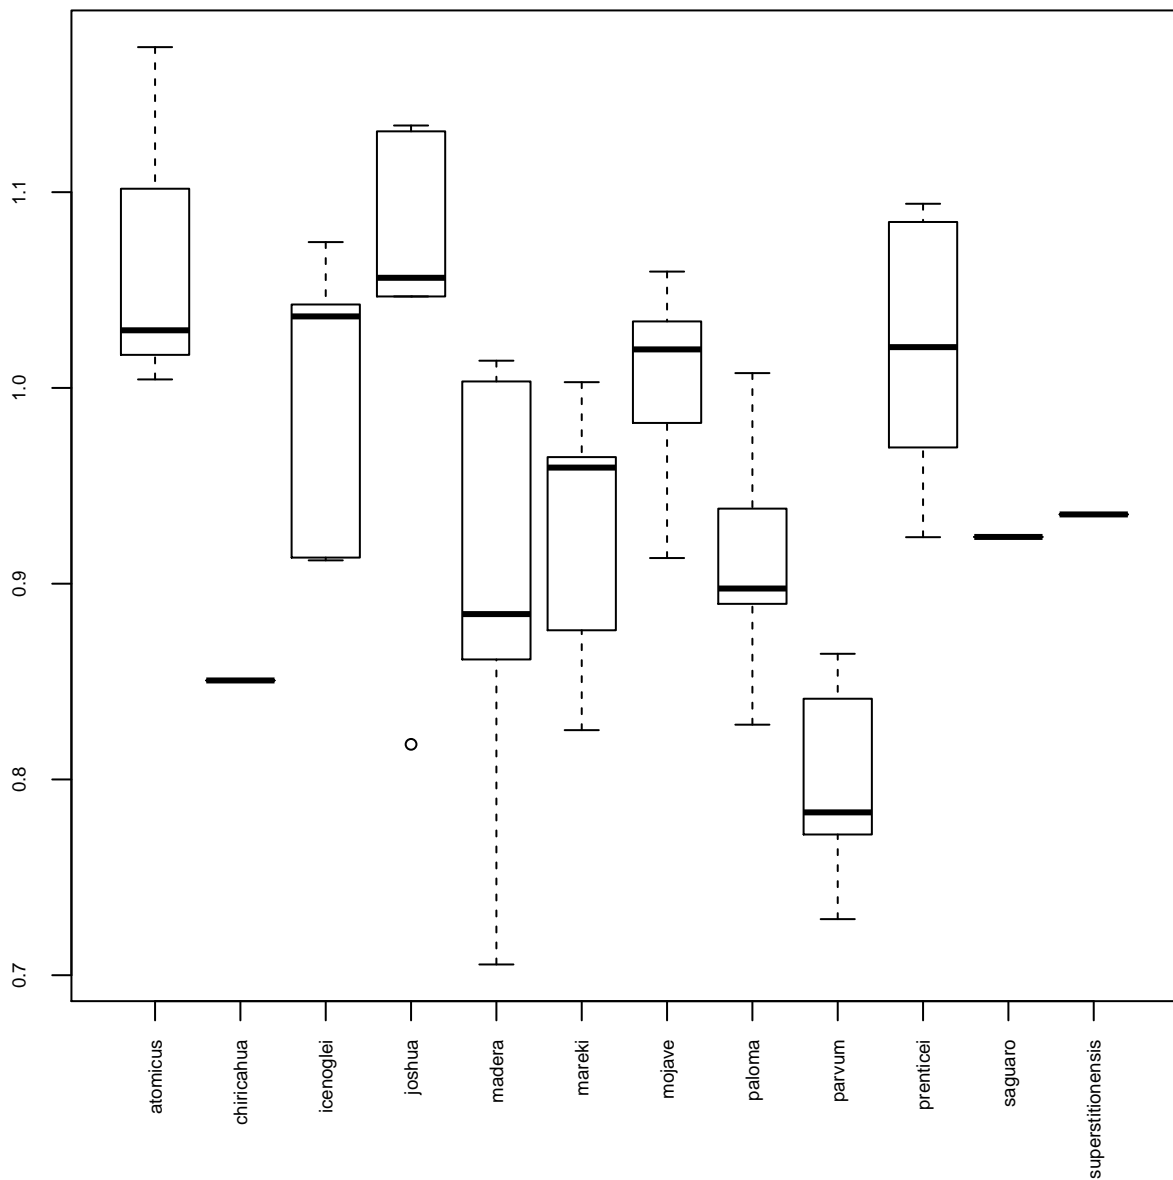

Supplement: Supplementary file 1251

## Patella 3/Tarsus 3 ratio – males

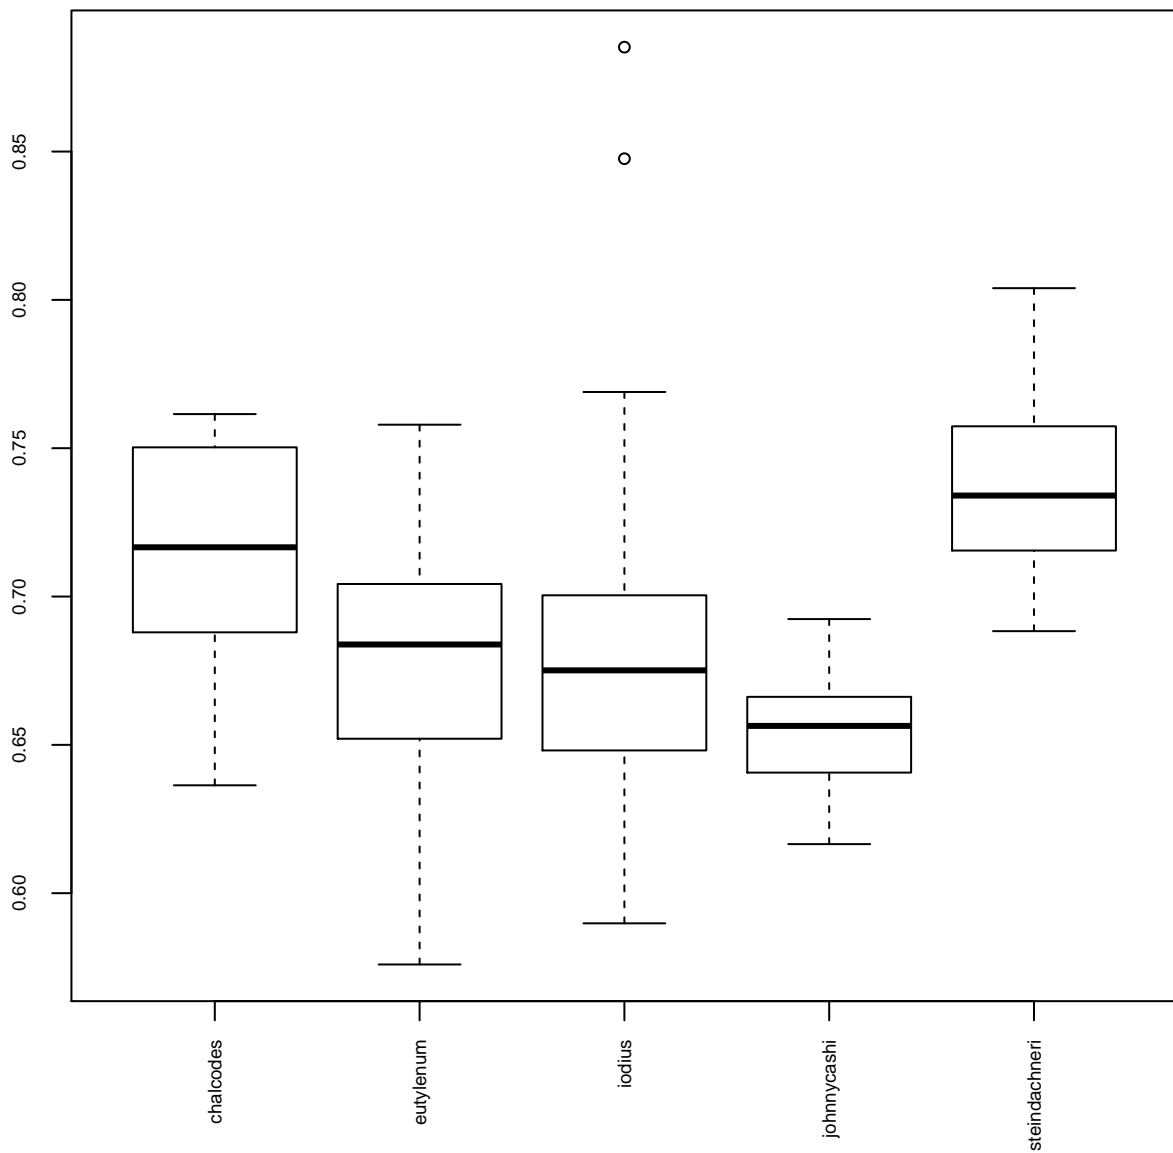

Supplement: Supplementary file 1252

# Metatarsus 3/Tarsus 4 Length ratio – males

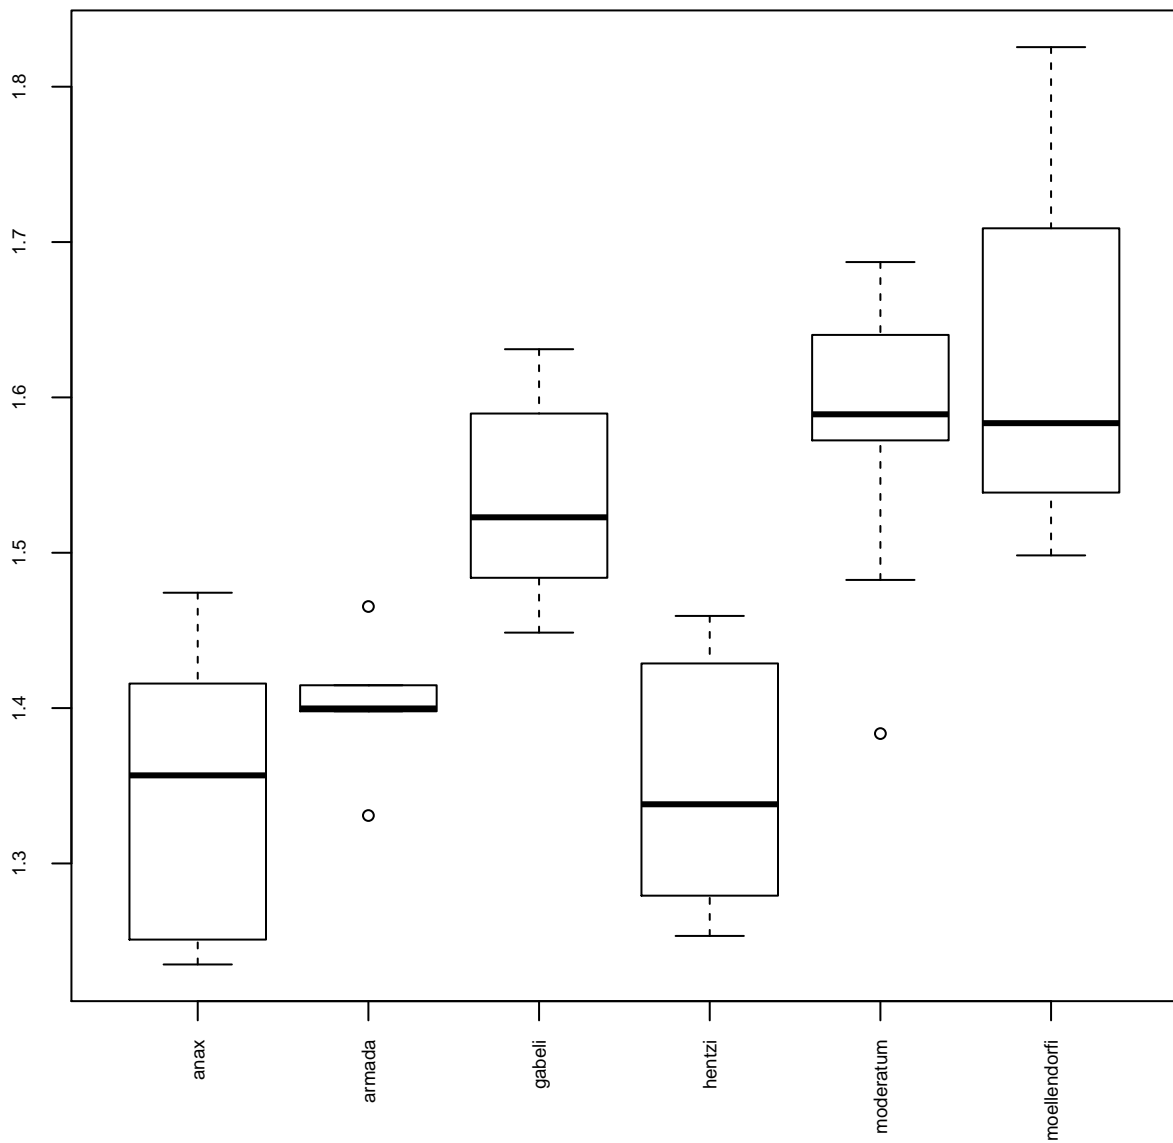

Supplement: Supplementary file 1253

## Tibia 4/Tarsus 4 ratio – females

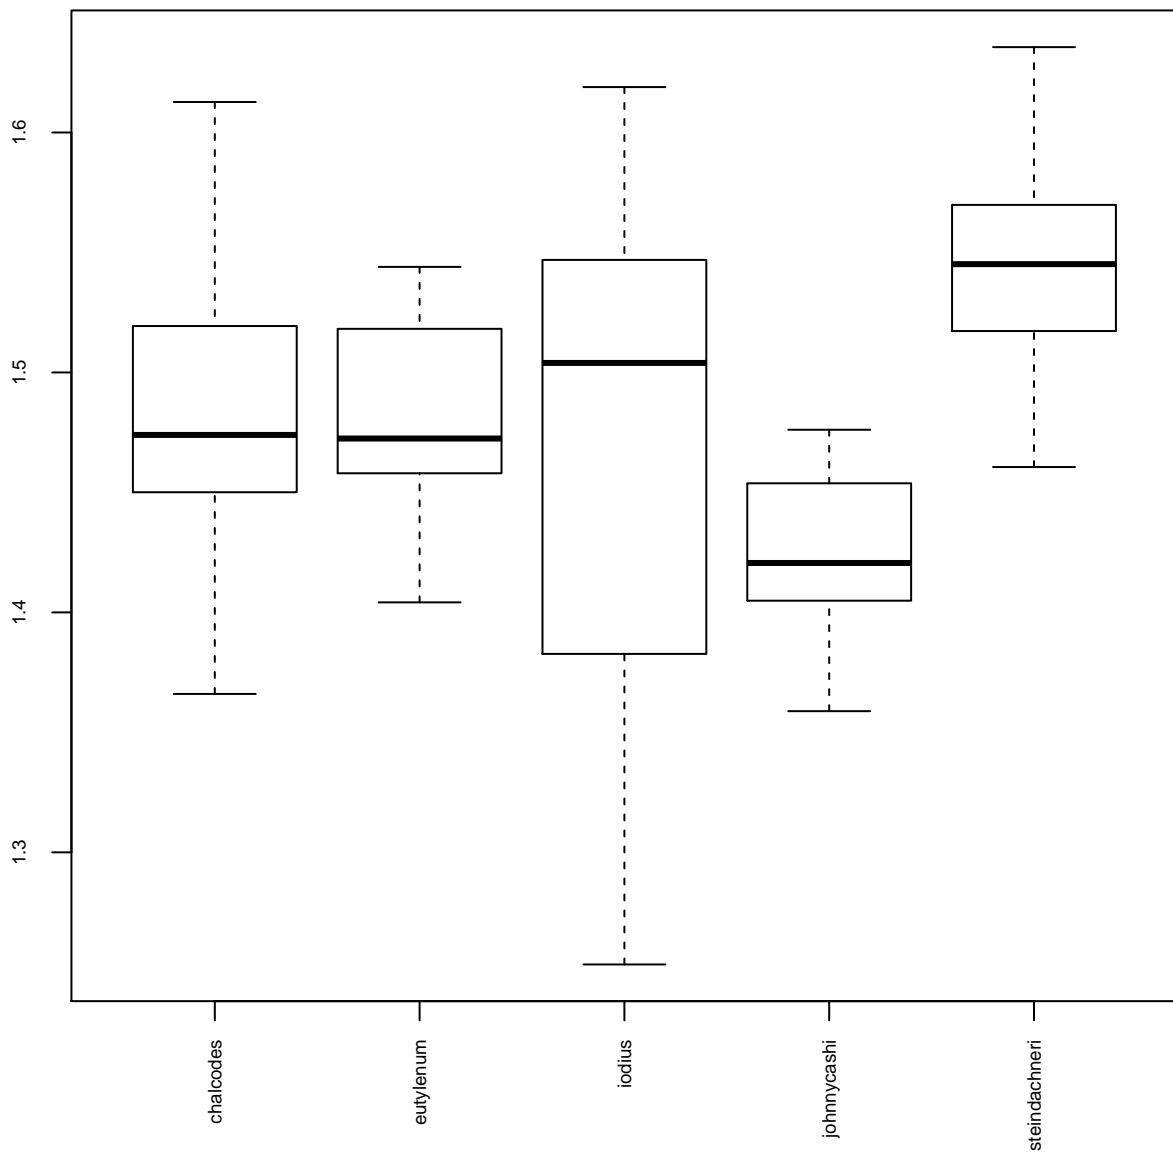

Supplement: Supplementary file 1254

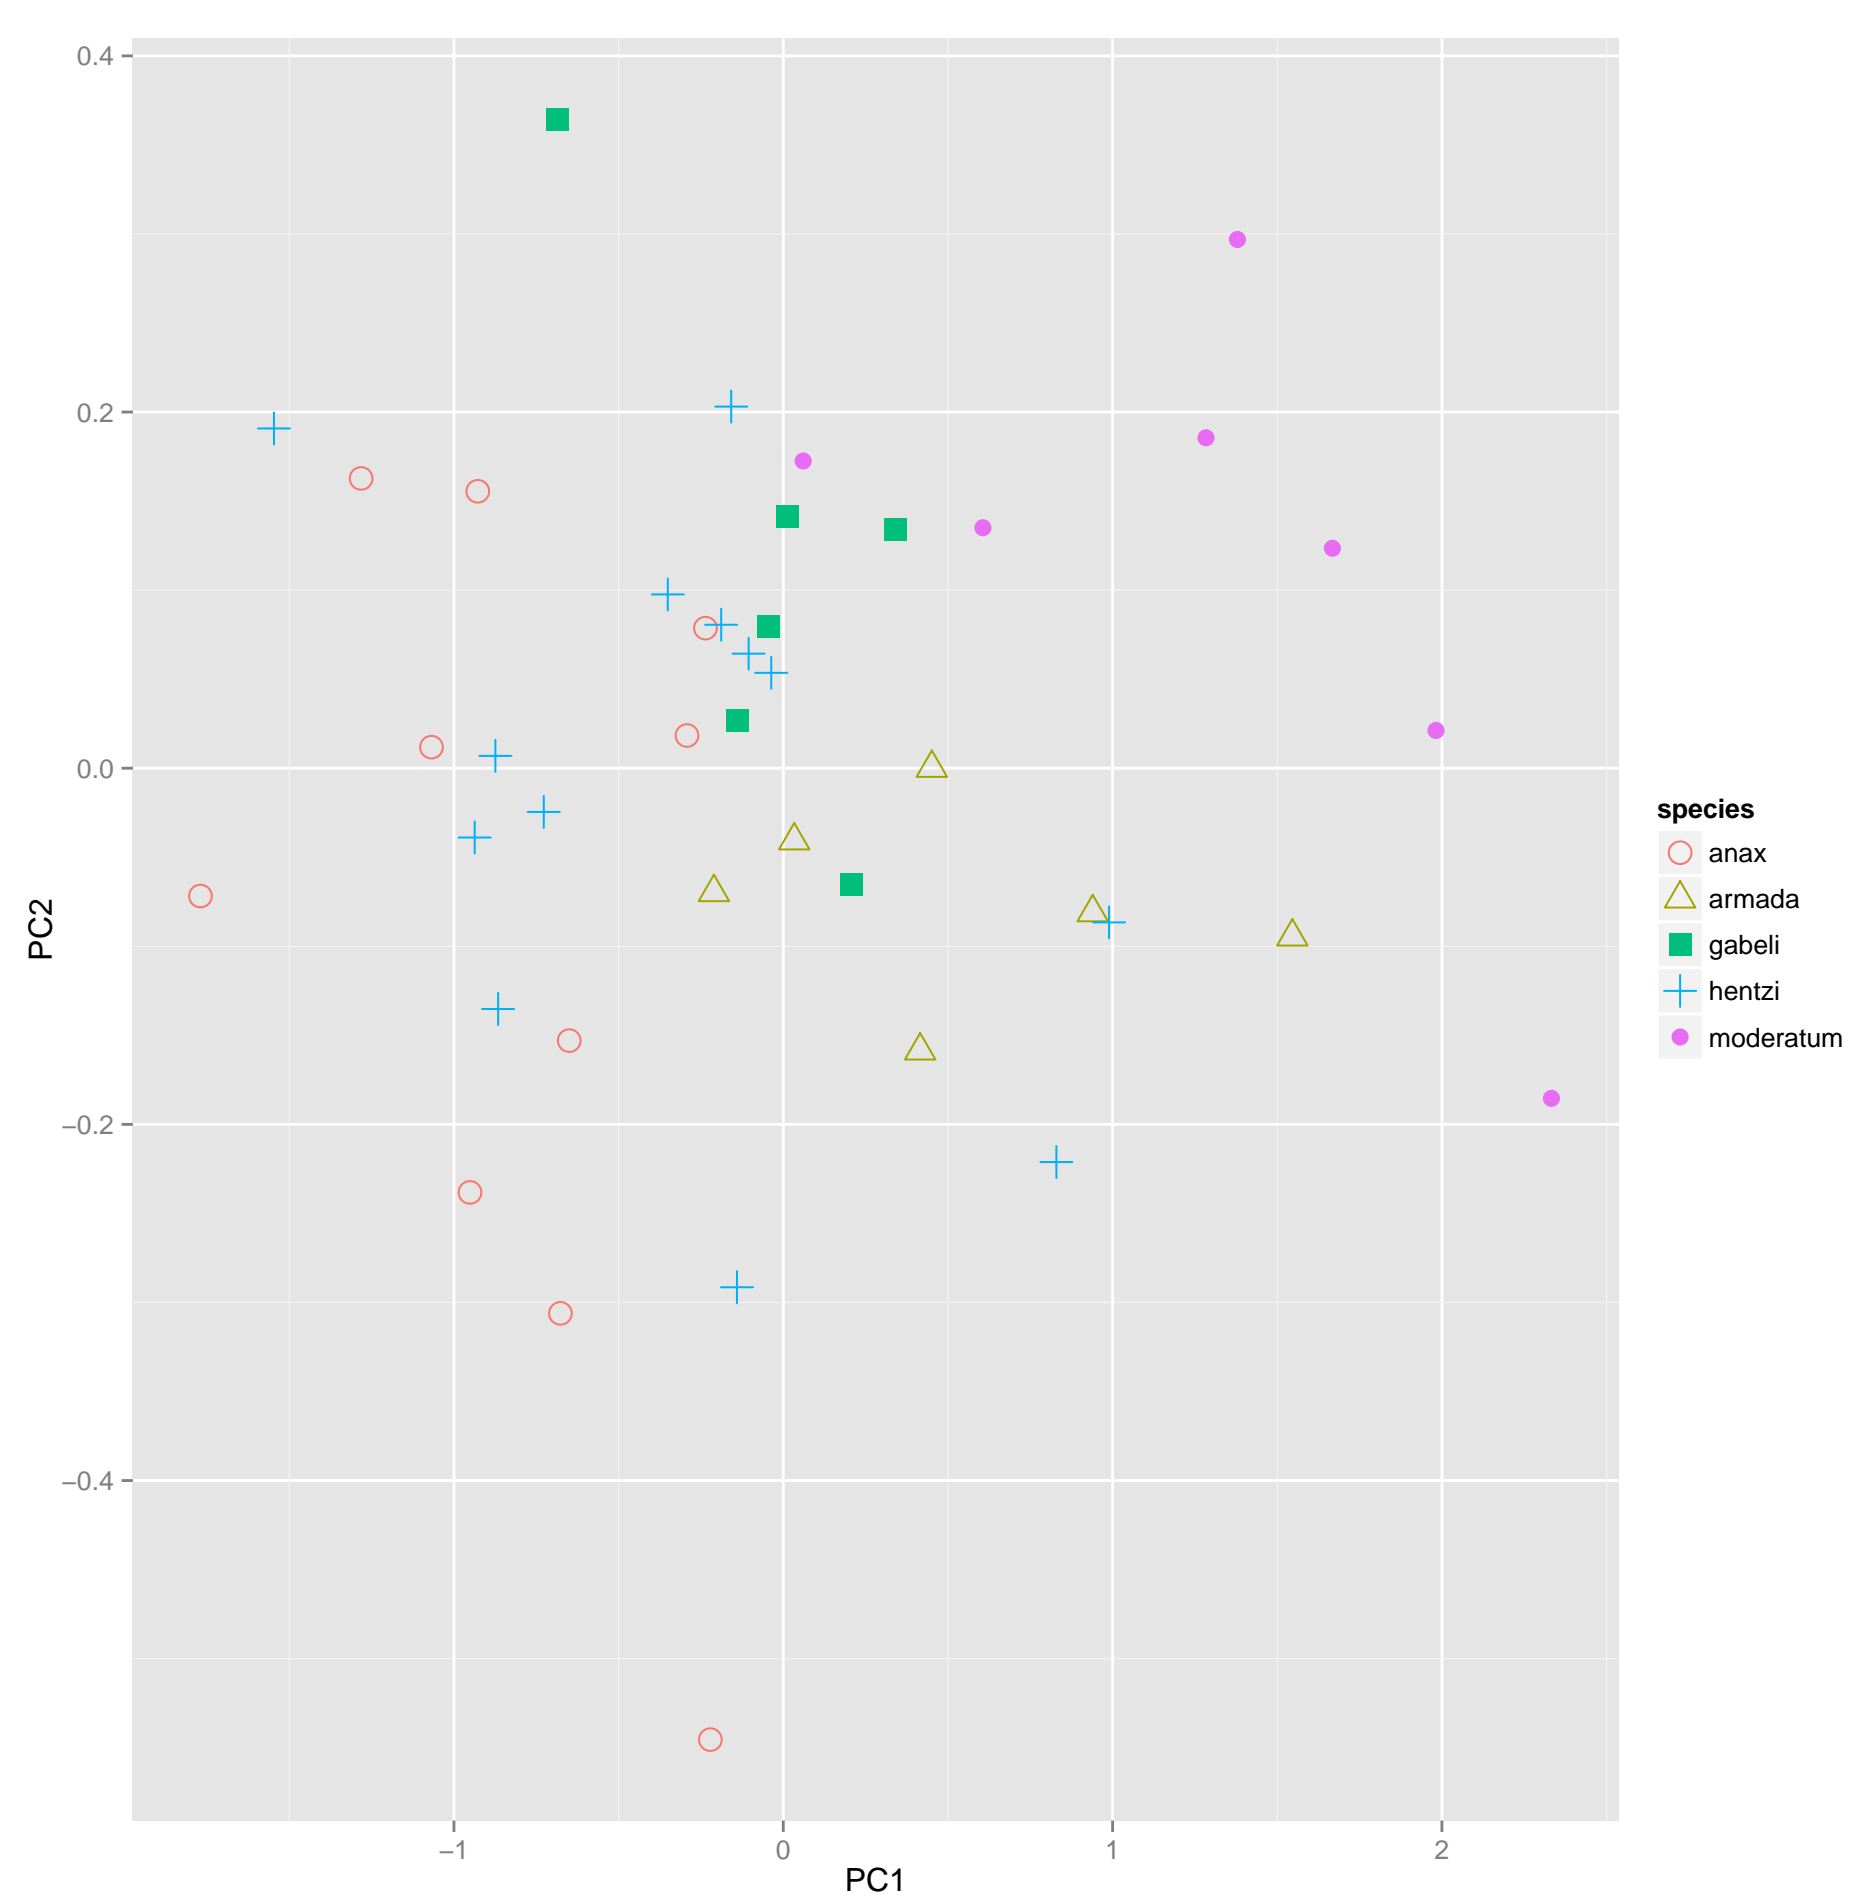

Supplement: Supplementary file 1255

## Tibia 4/Tarsus 4 ratio – males

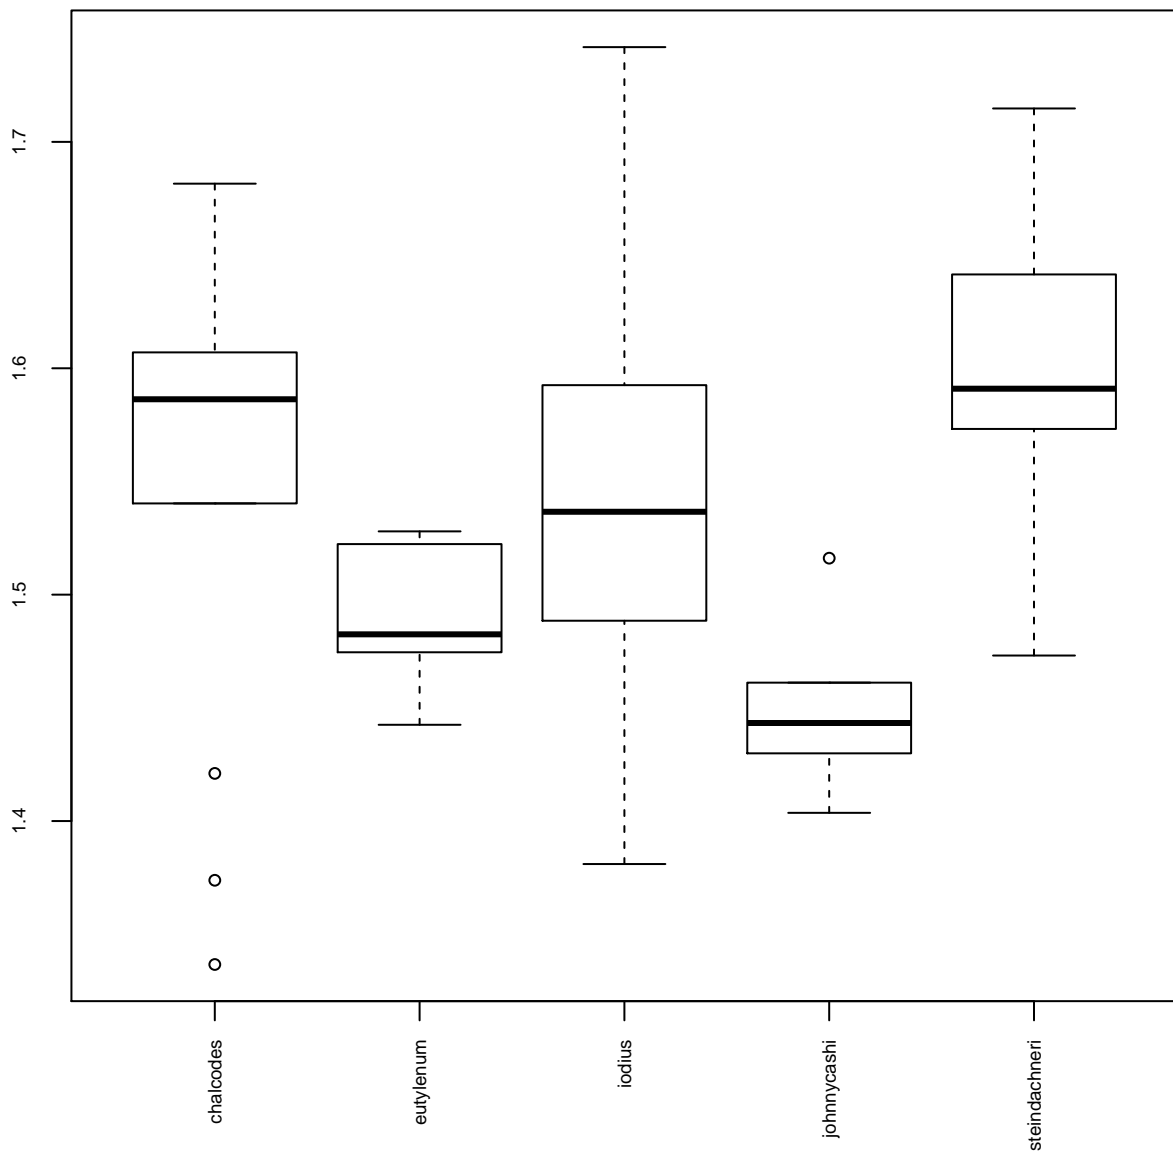

Supplement: Supplementary file 1256

### Leg 3 Scopulation ratio – males

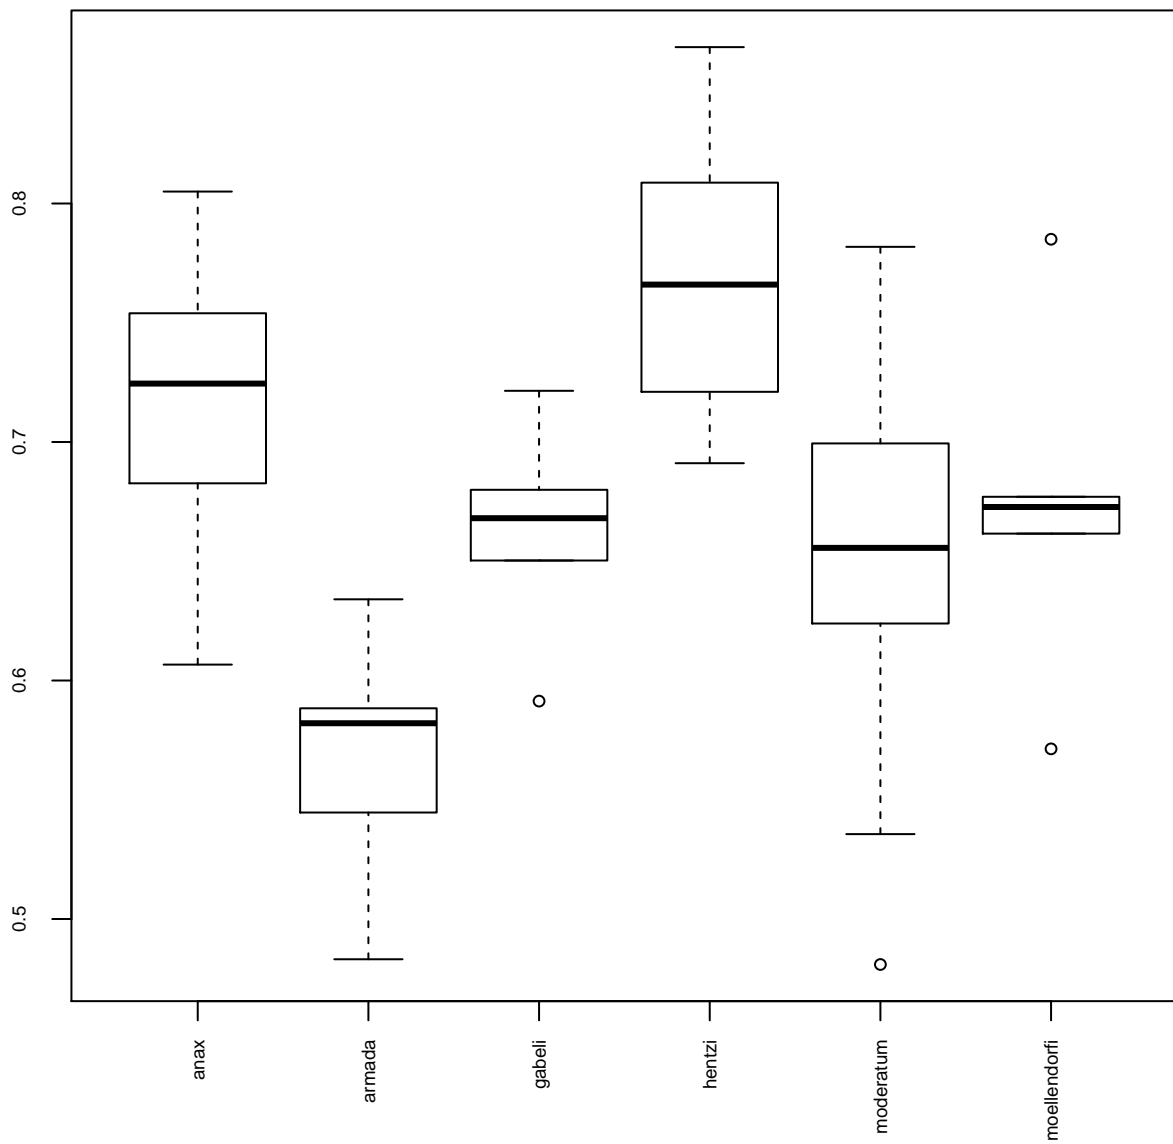

Supplement: Supplementary file 1257

## Femur 1/Tibia 1 ratio – males

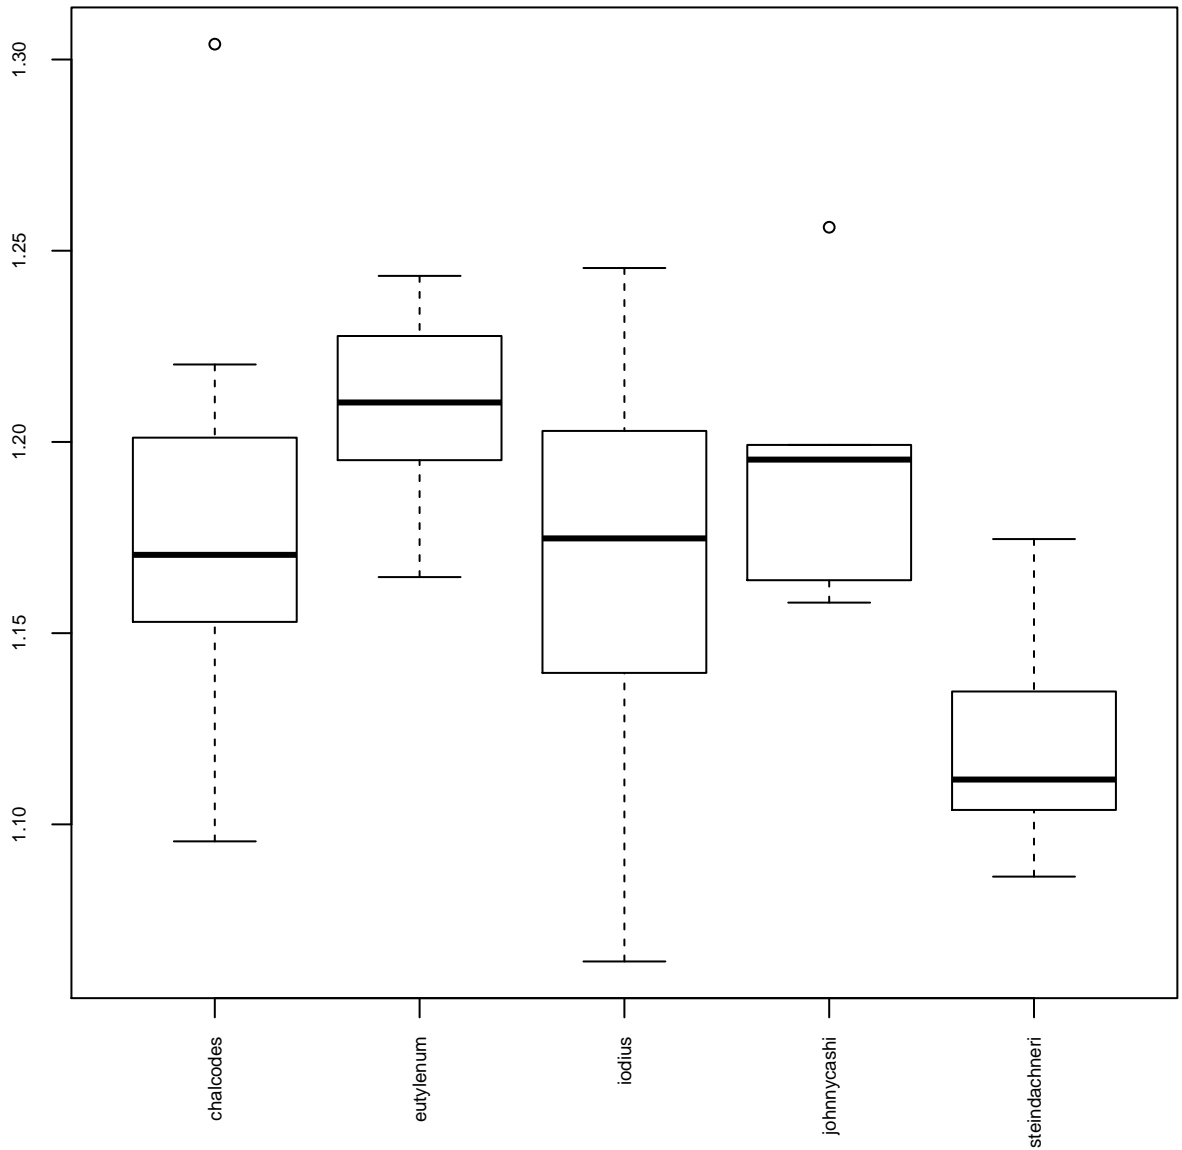

Supplement: Supplementary file 1258

## Metatarsus 4/Tarsus 4 ratio – females

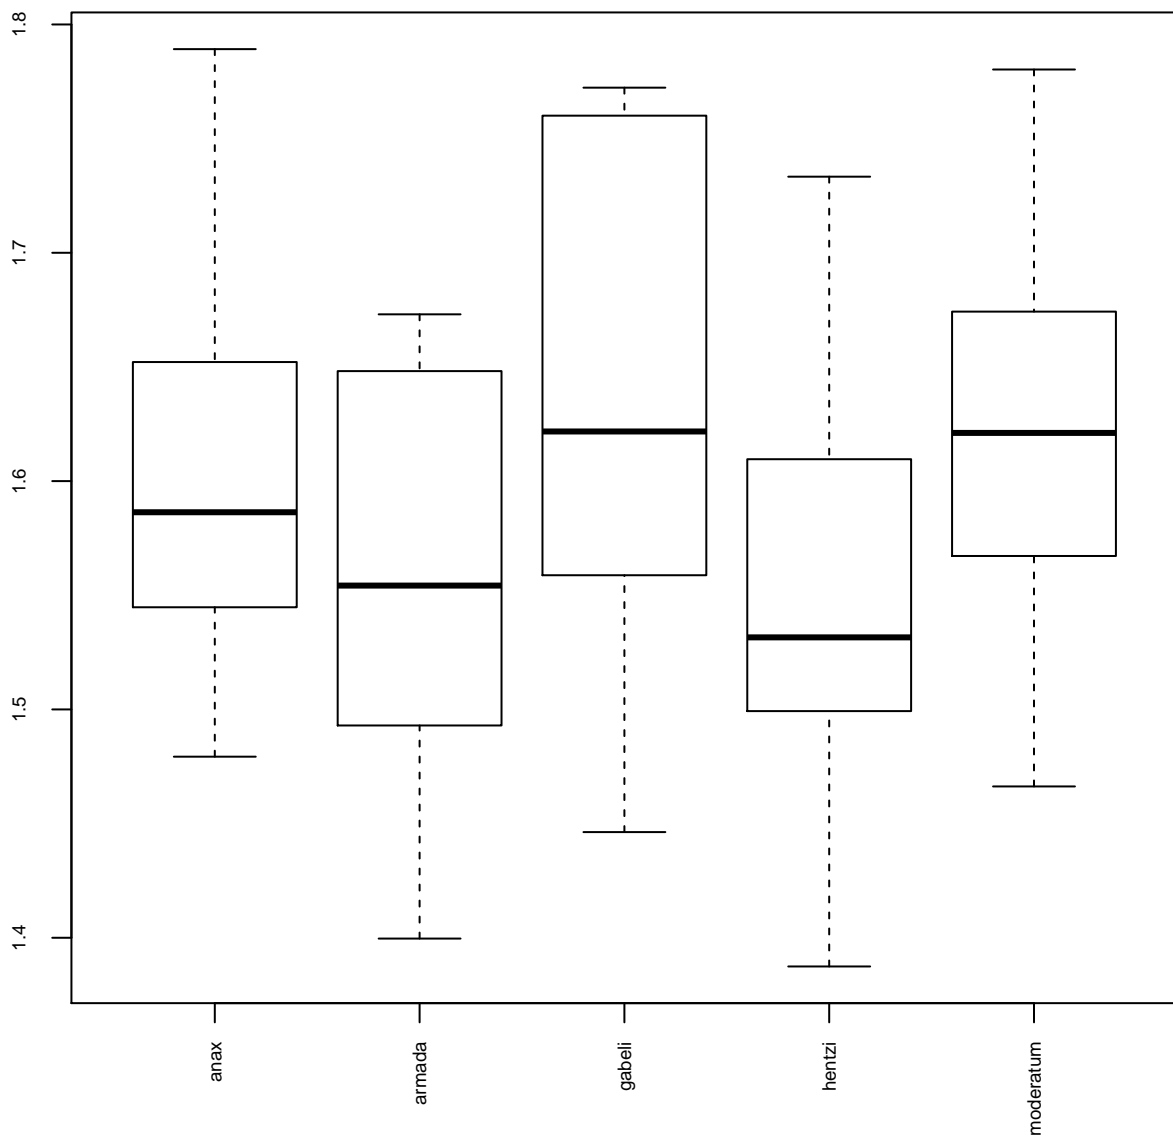

Supplement: Supplementary file 1259

# Tarsus 1/Tarsus 3 ratio – males

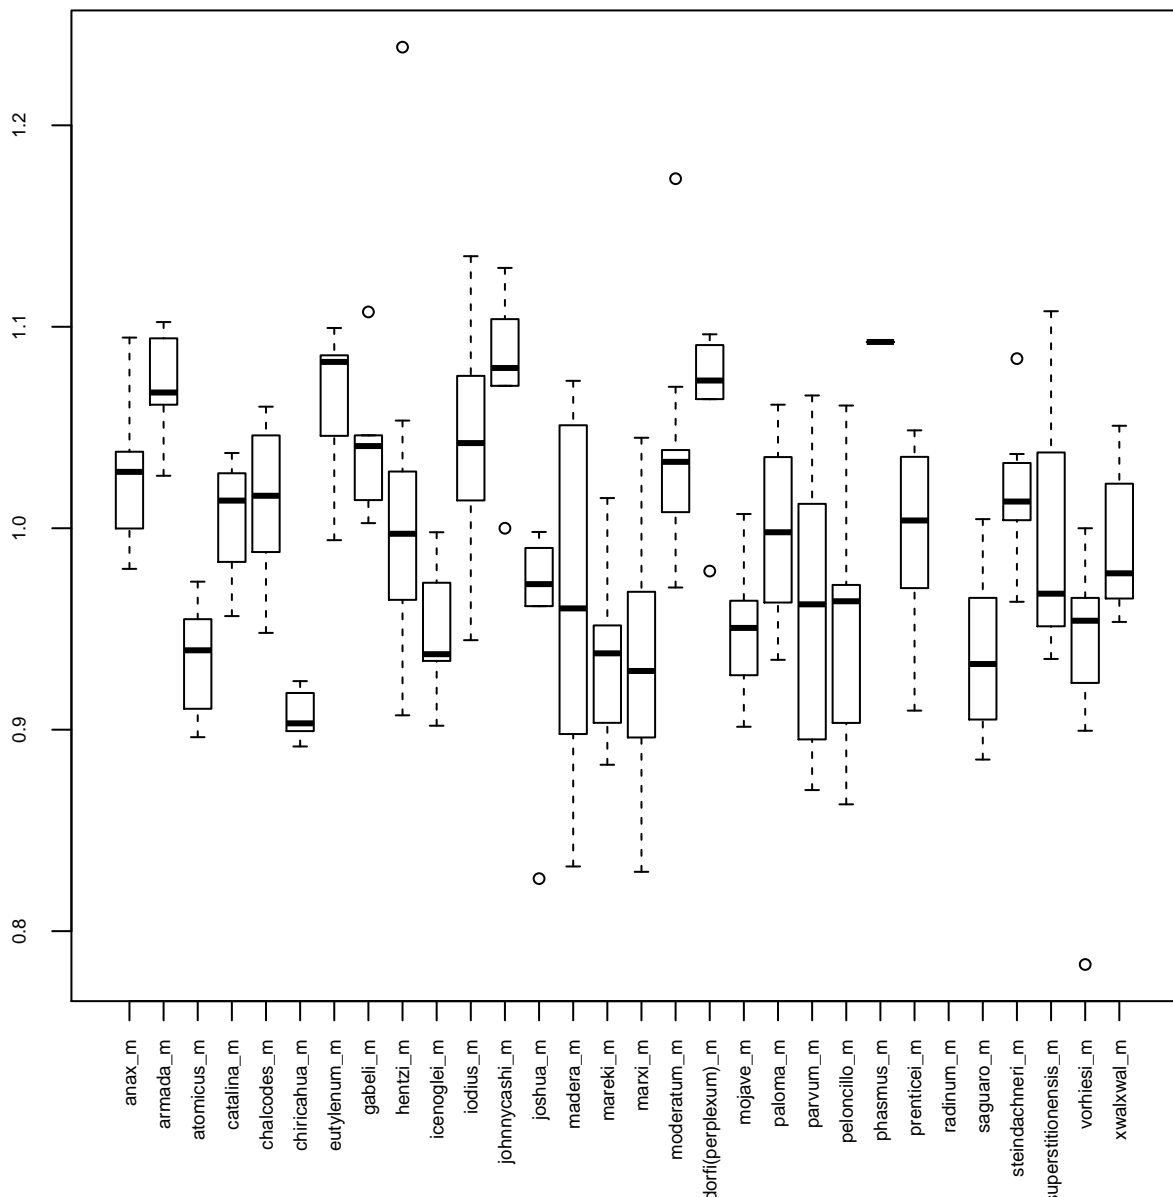

Supplement: Supplementary file 1260

## Femur 4/Patella 4 ratio – males

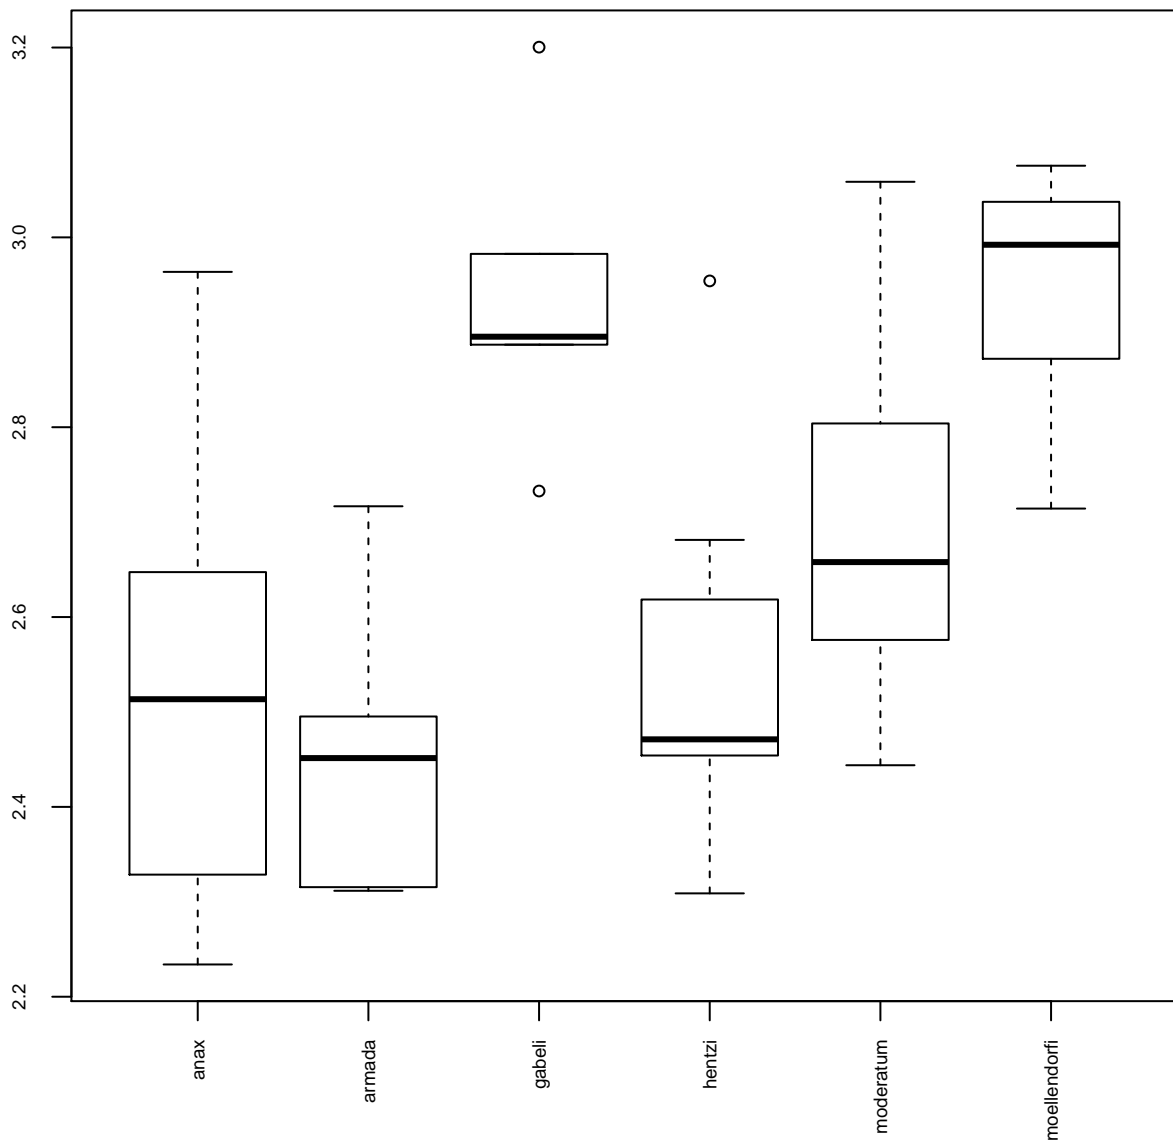

Supplement: Supplementary file 1261

# Carapace Length/Tibia 4 ratio – females

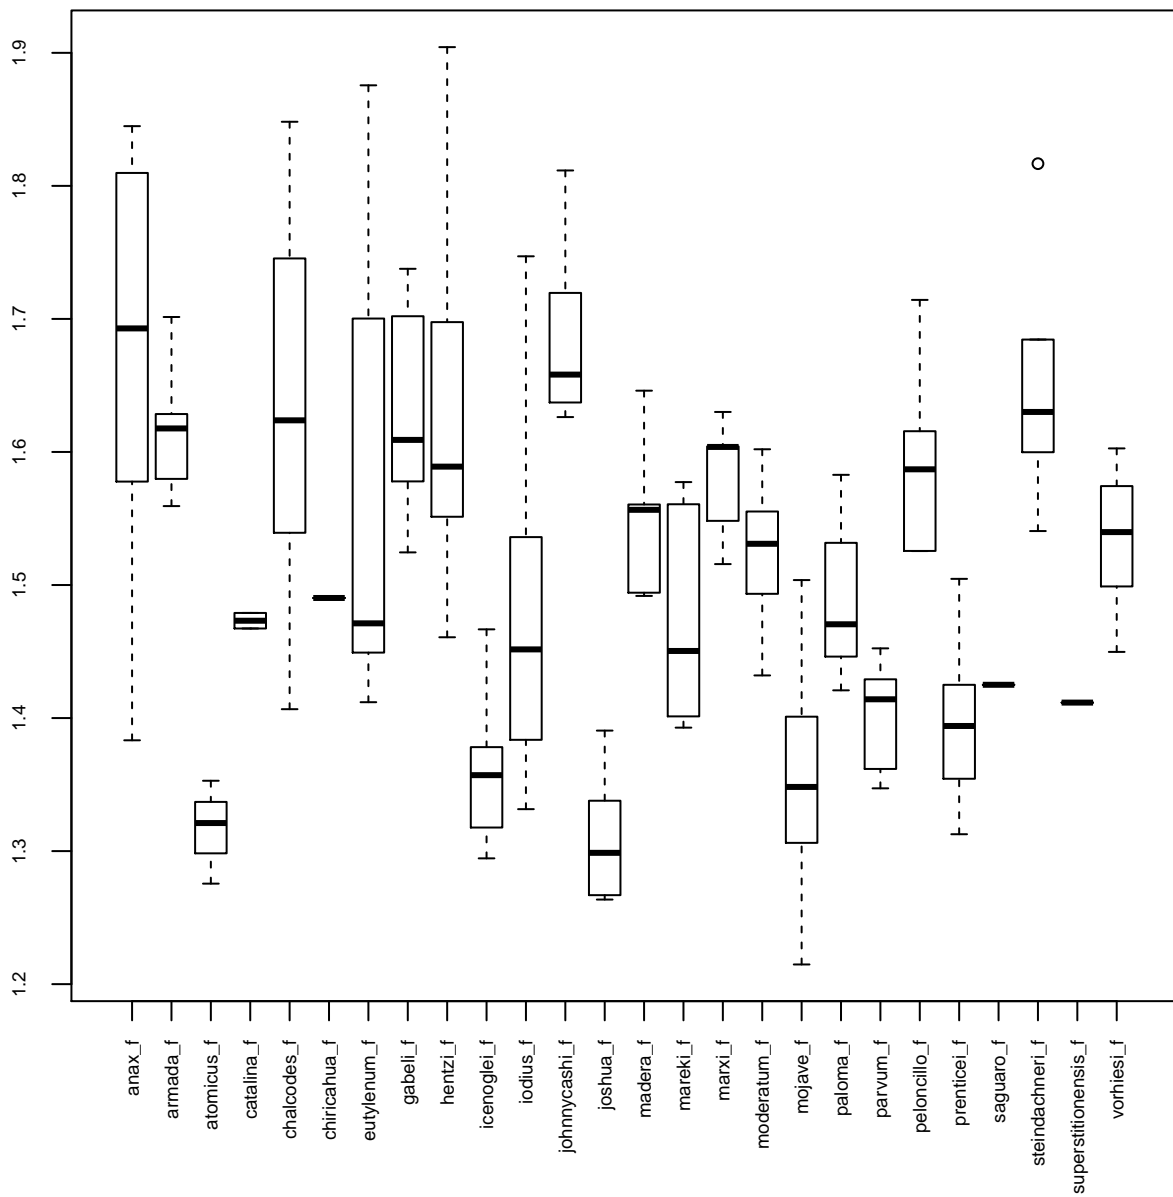

Supplement: Supplementary file 1262

## Femur 4/Tibia 4 ratio – males

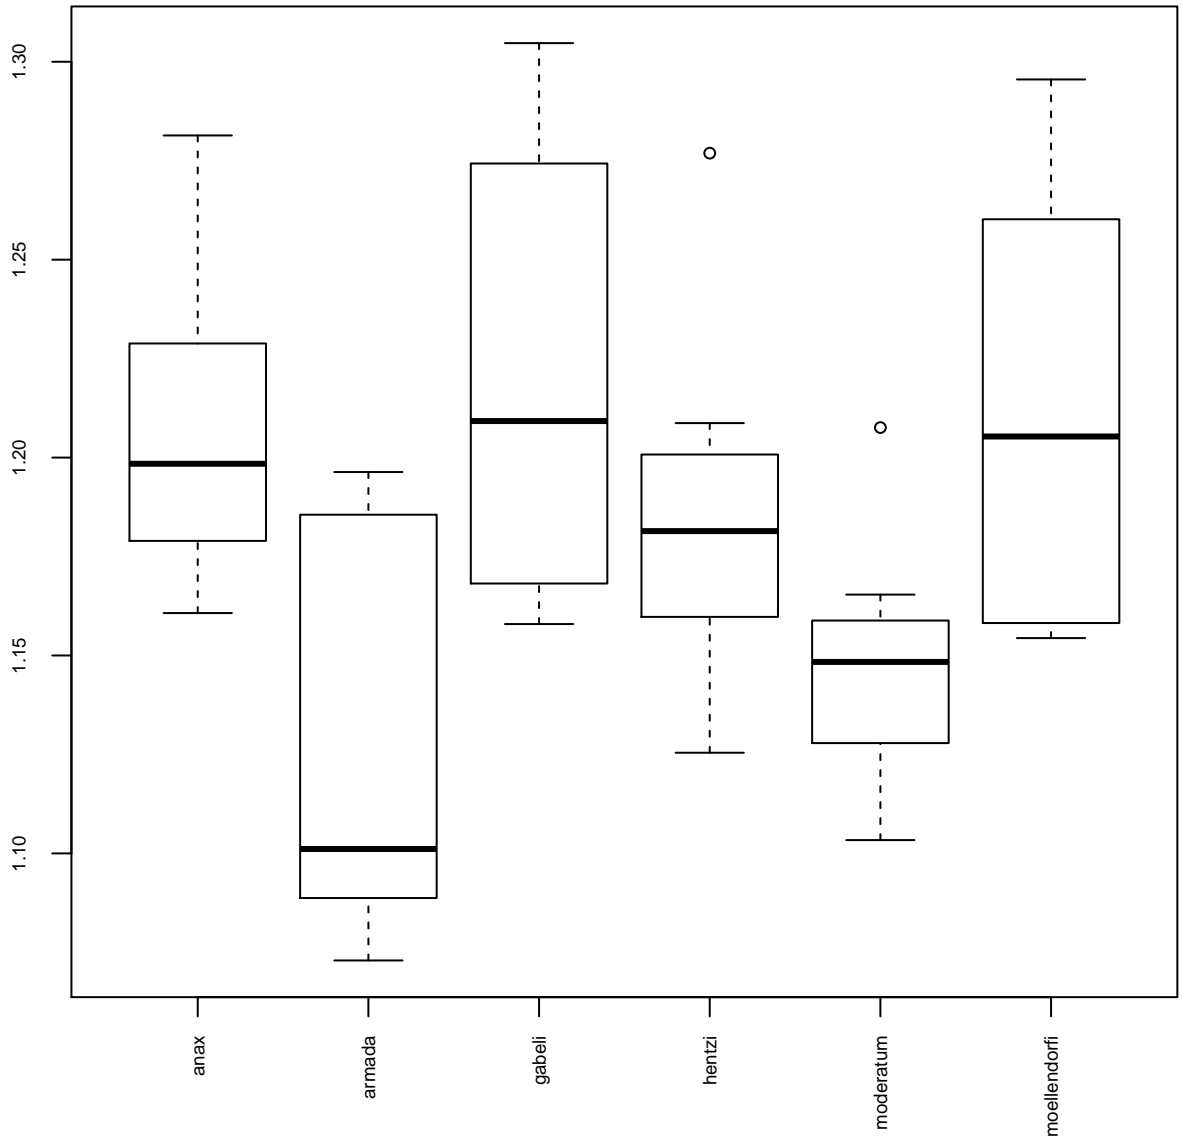

Supplement: Supplementary file 1263

## Carapace Length/Metatarsus 4 ratio – males

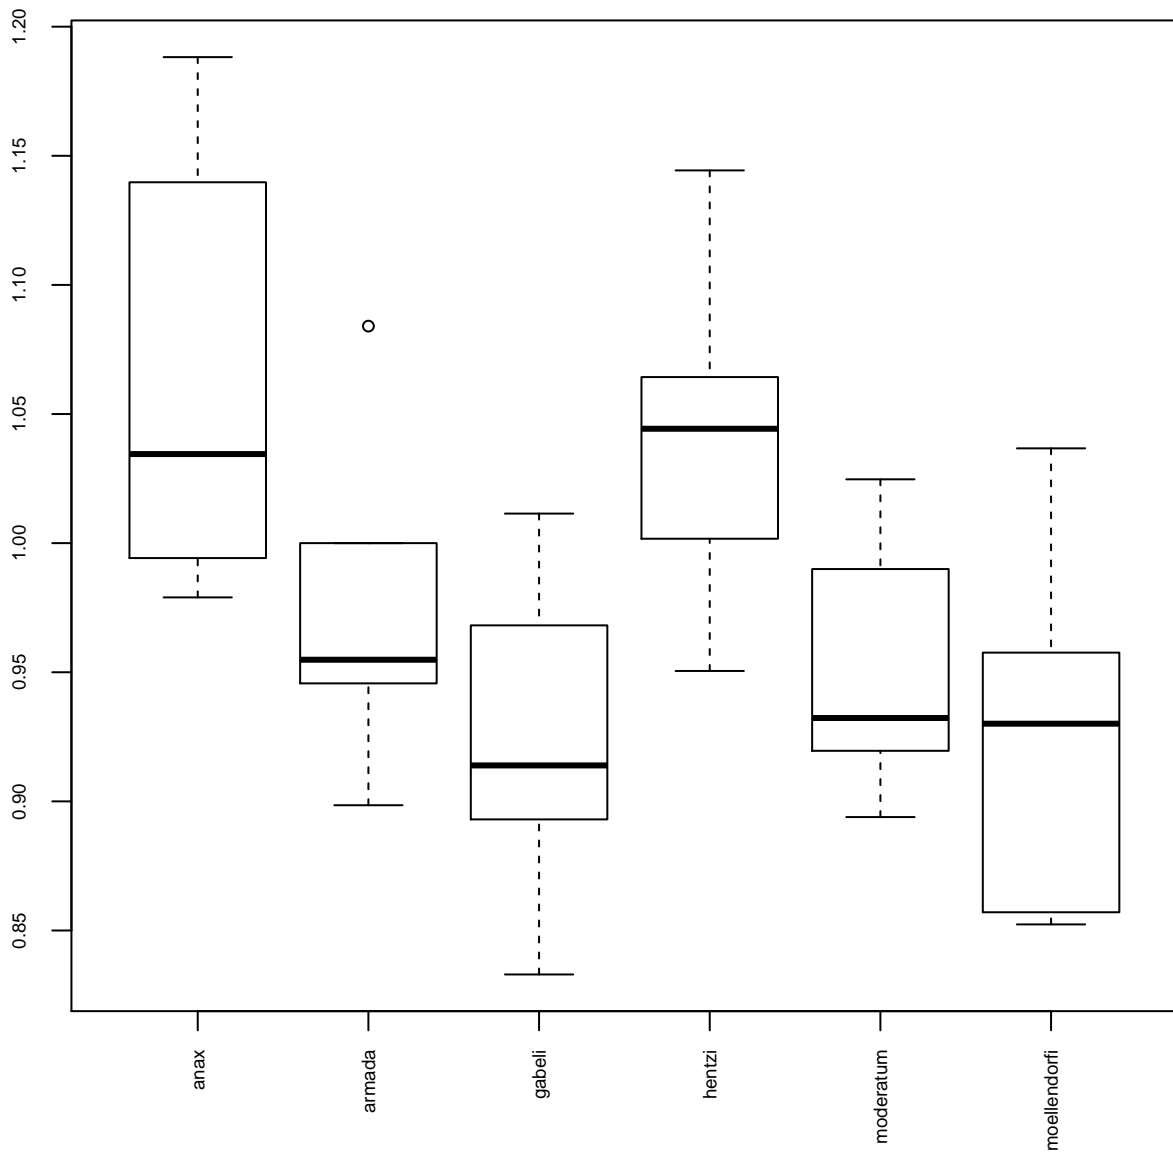

Supplement: Supplementary file 1264

# Metatarsus 1/Tibia 3 Length ratio – males

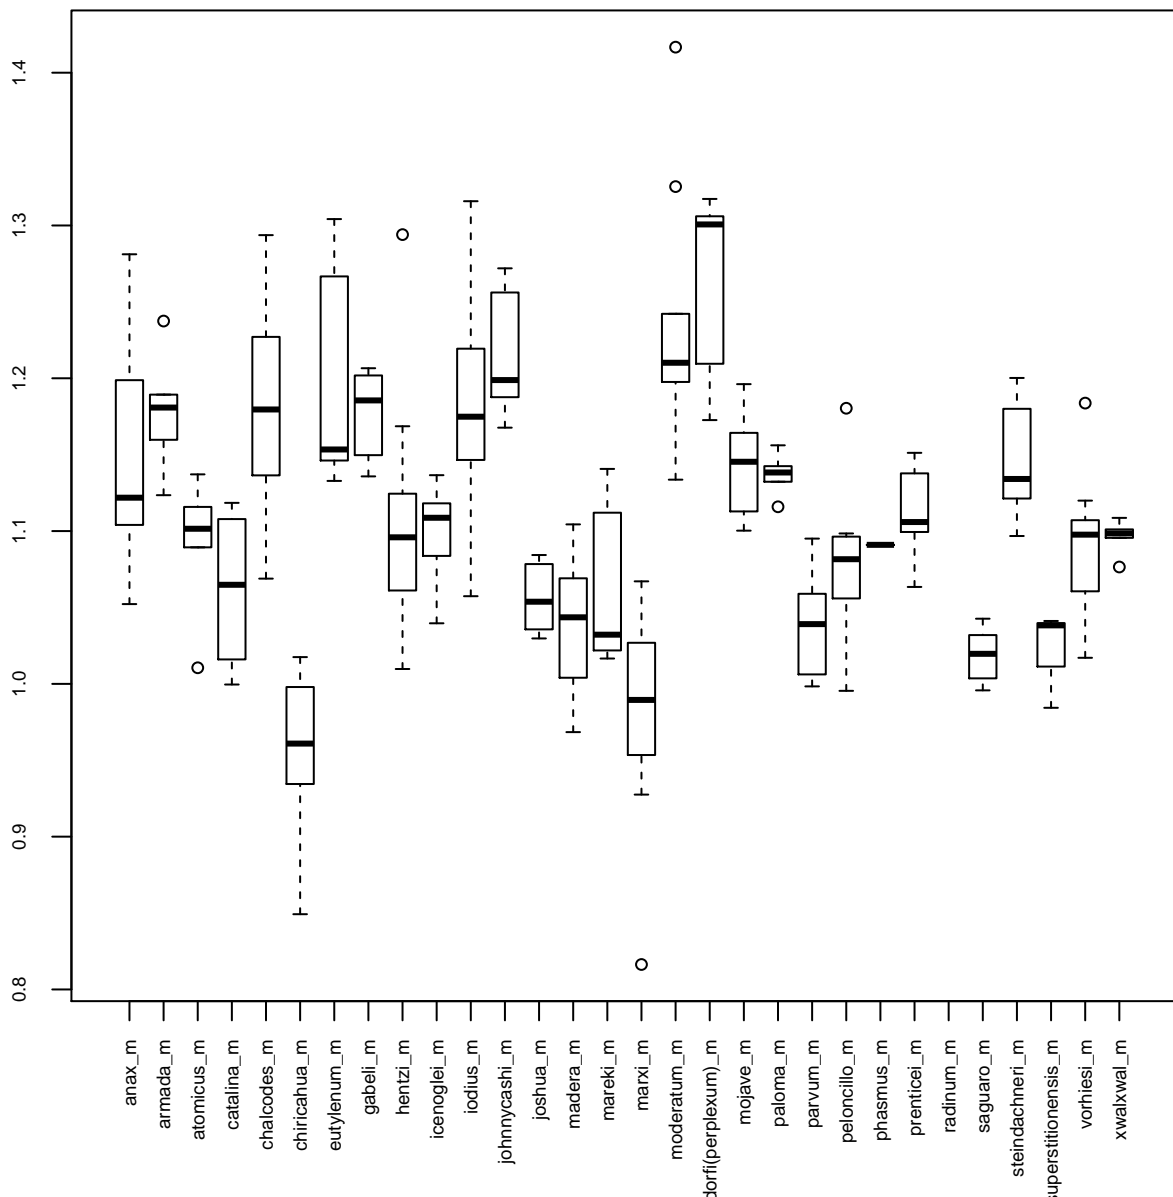

Supplement: Supplementary file 1265

## Carapace Length/Tibia 1 ratio – females

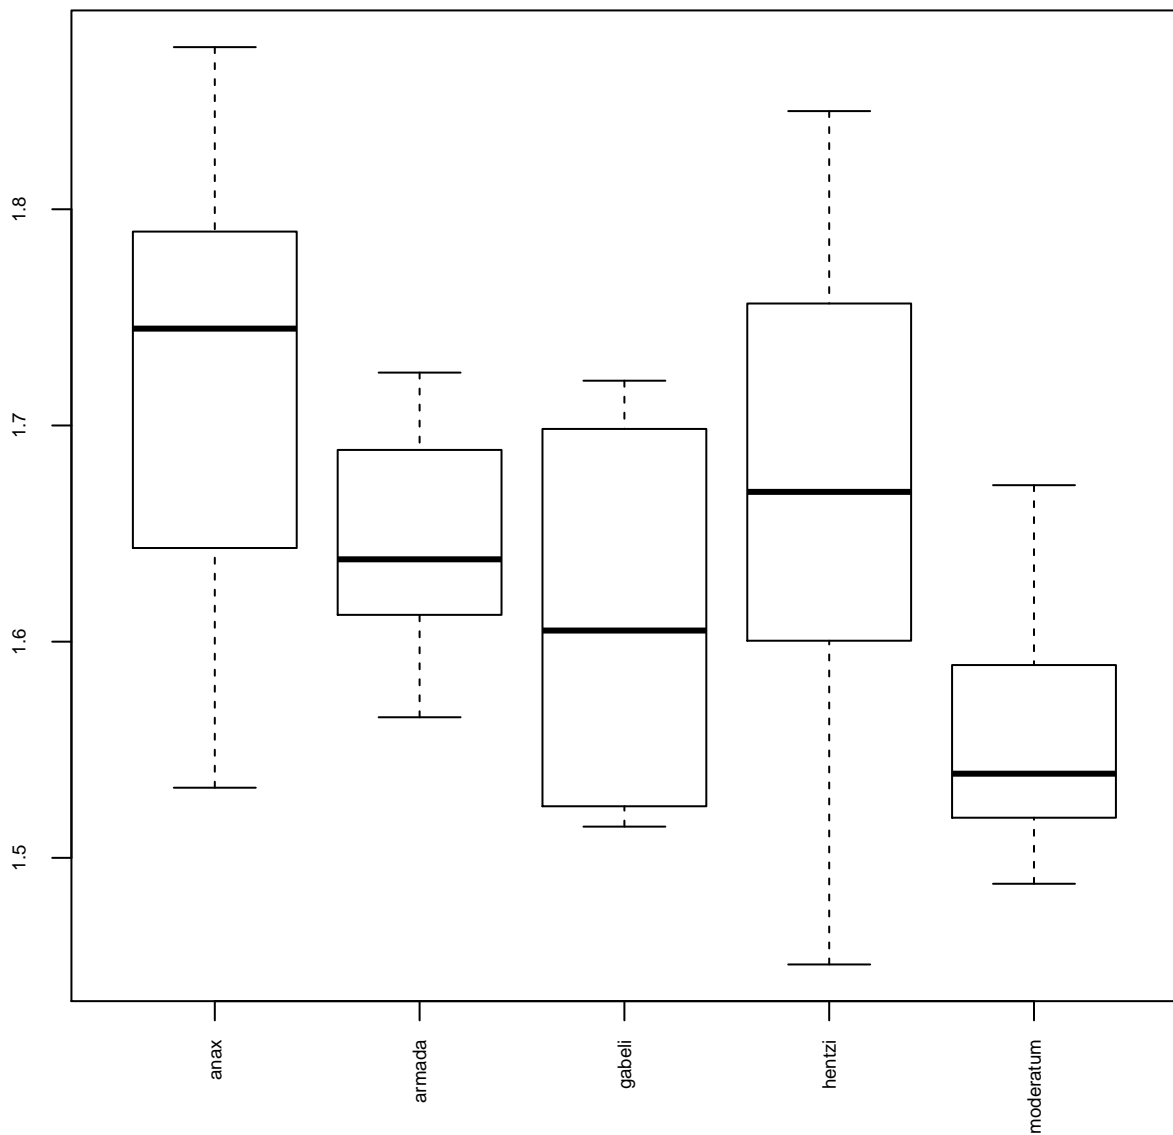

Supplement: Supplementary file 1266

## Patella 1/Tibia 4 Length ratio – females

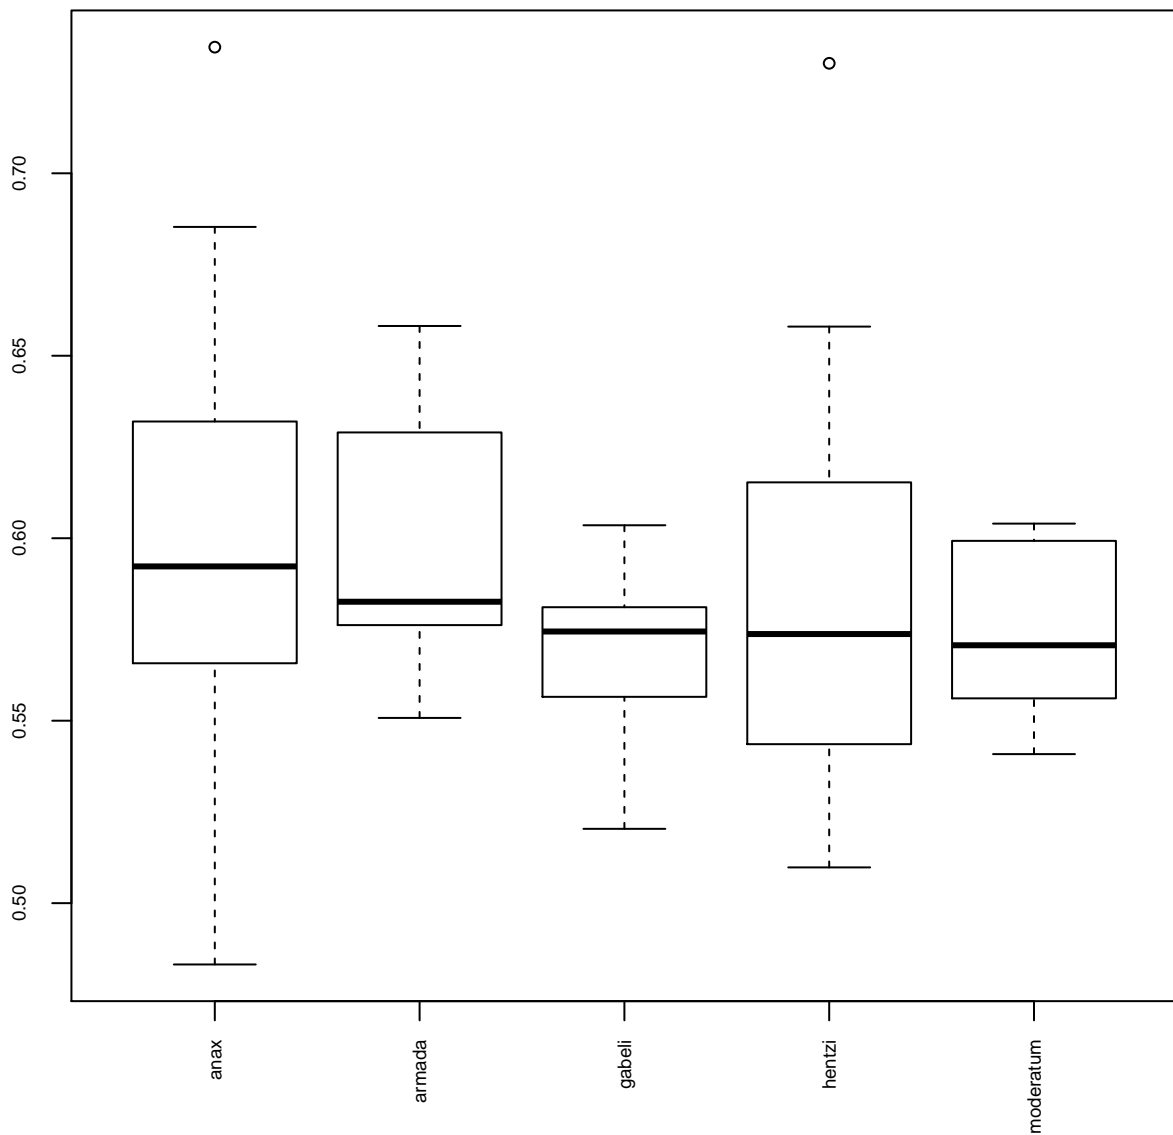

Supplement: Supplementary file 1267

# Tarsus 1/Metatarsus 3 Length ratio – males

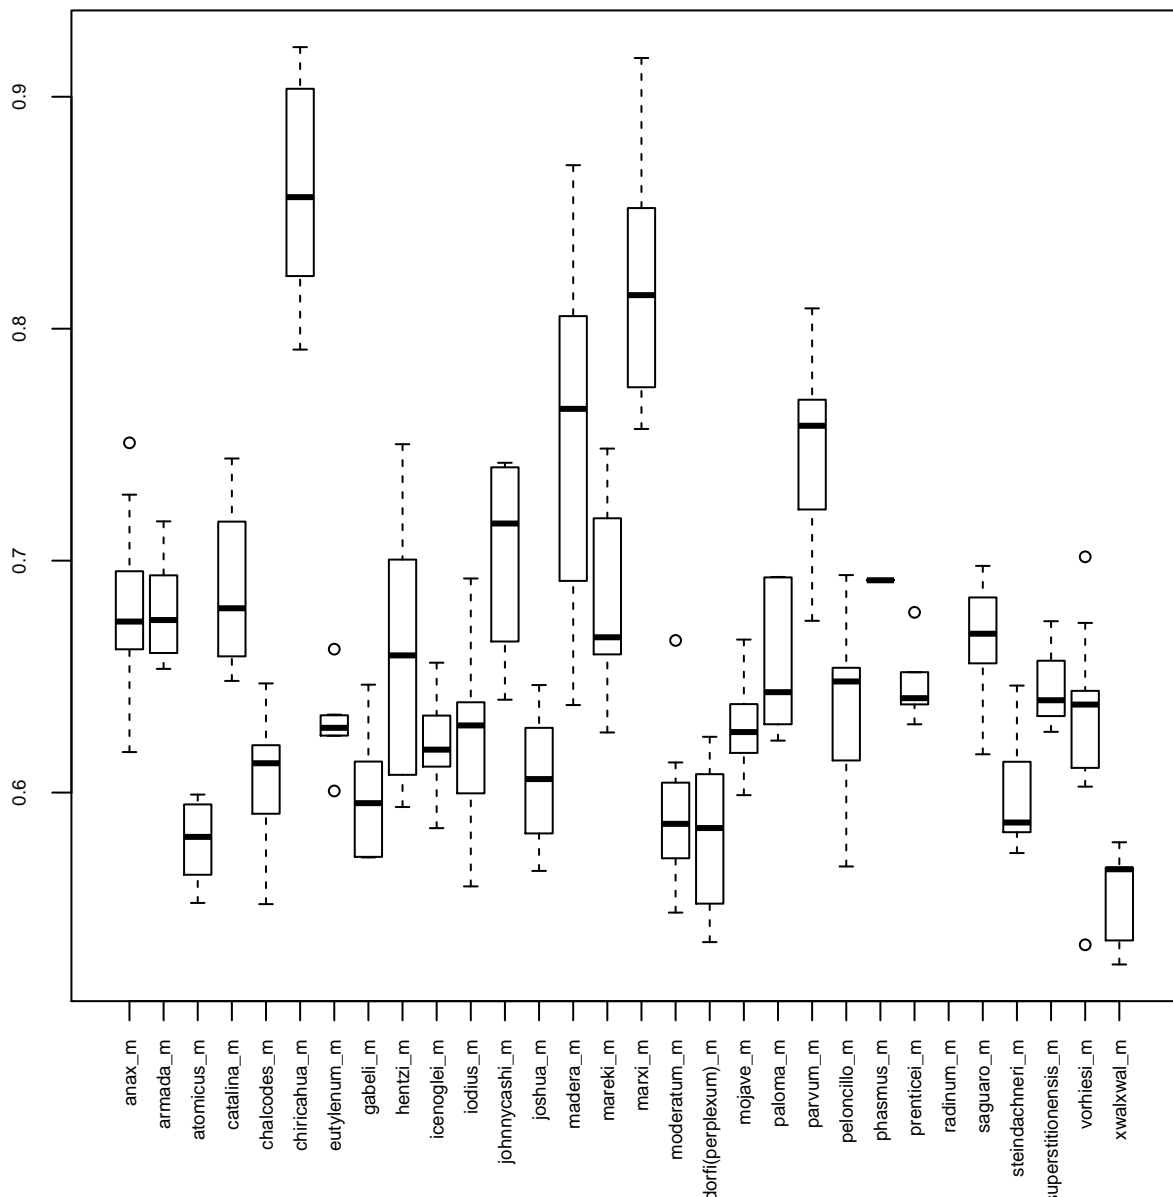

Supplement: Supplementary file 1268

## Tibia 3/Metatarsus 4 Length ratio – females

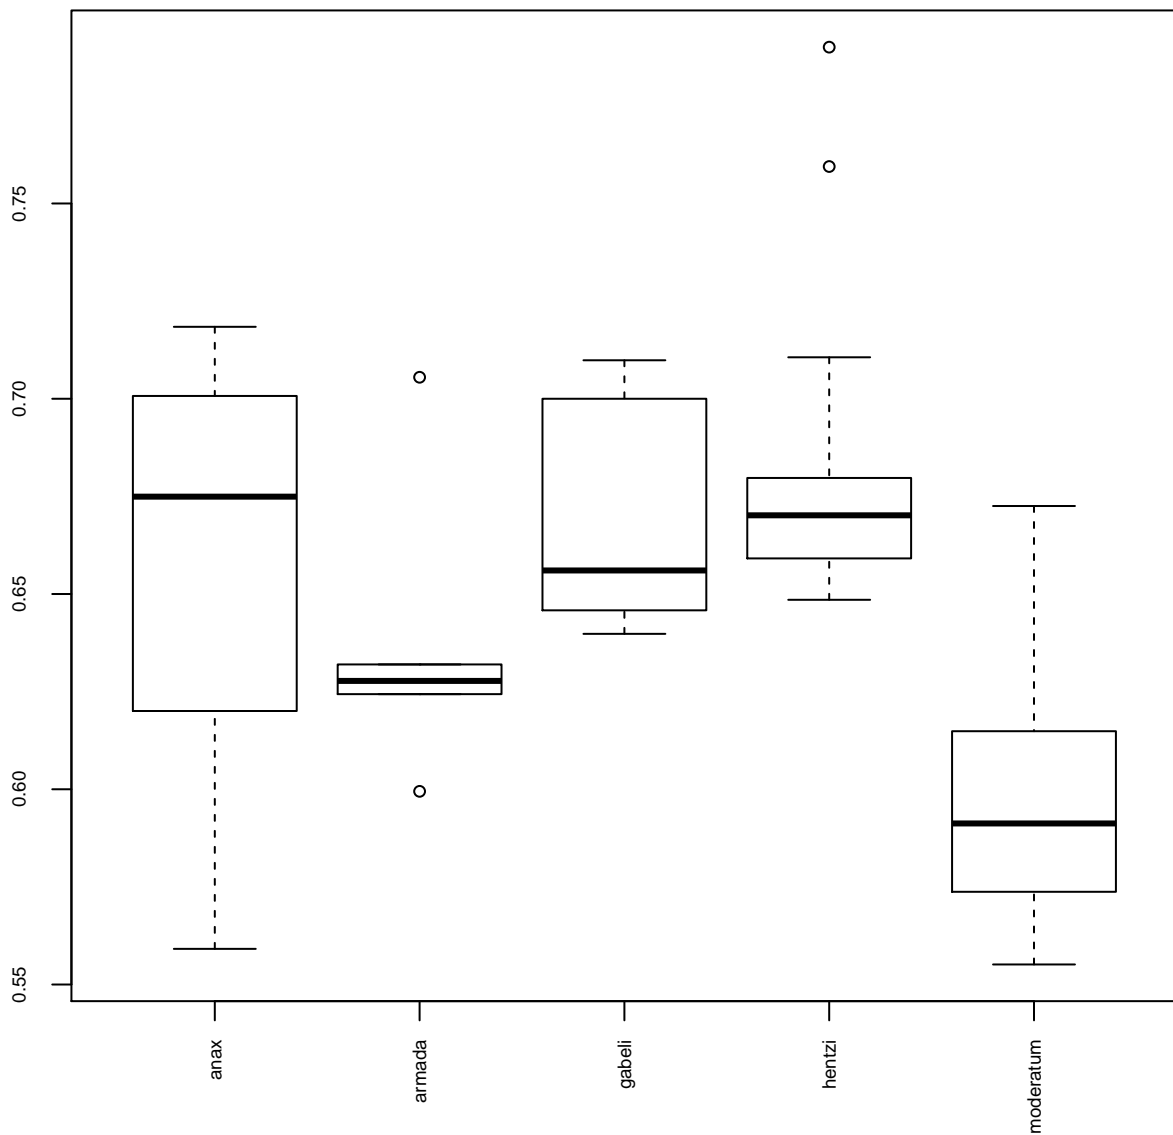

Supplement: Supplementary file 1269

## Carapace Length/Patella 3 ratio – females

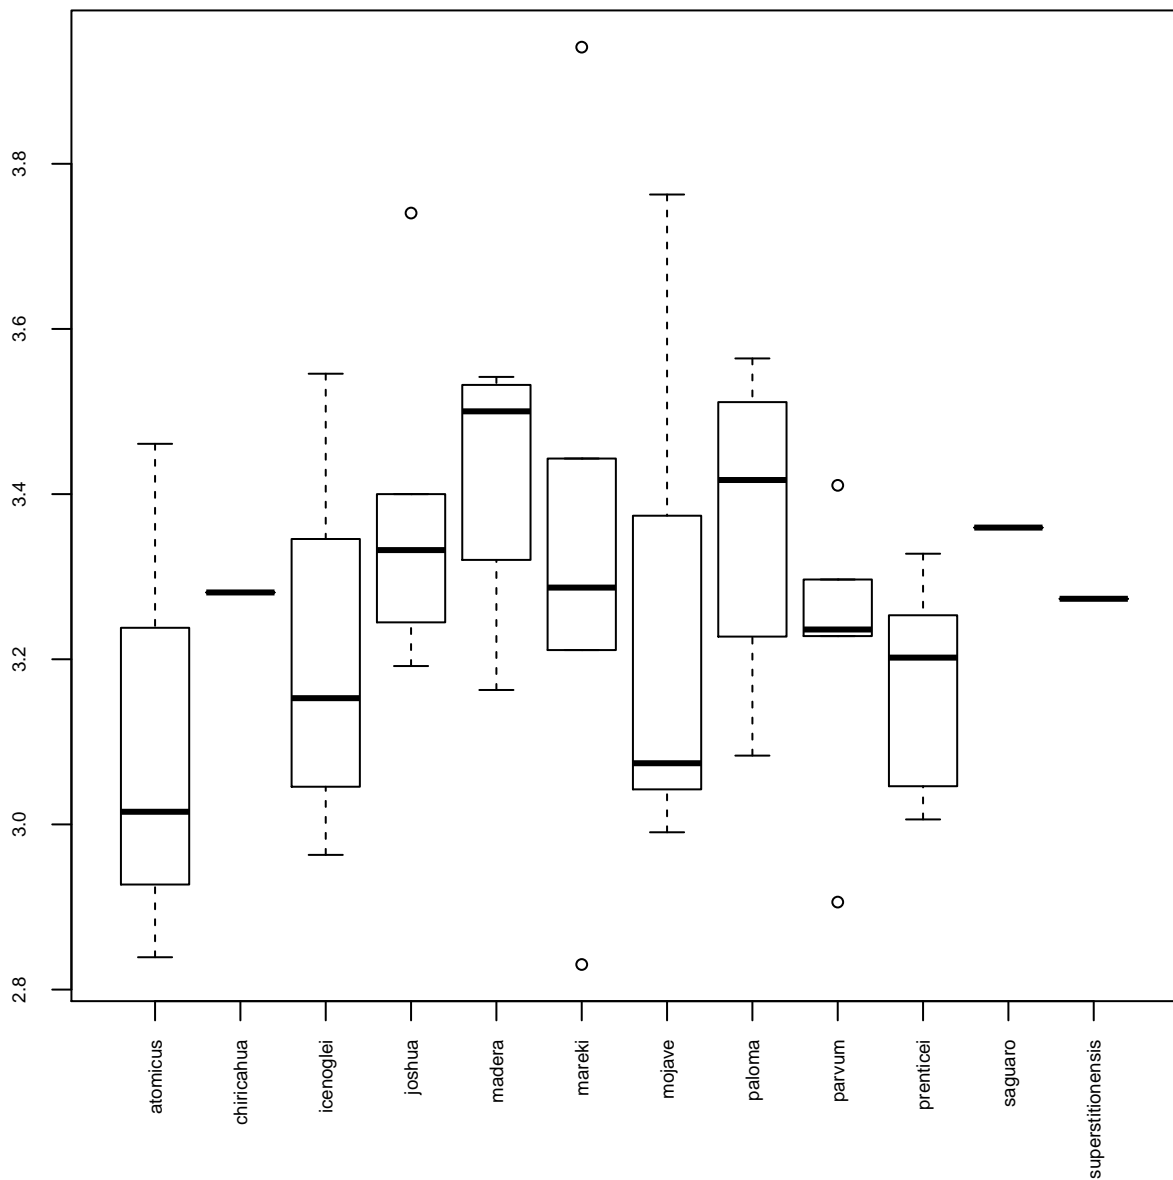

Supplement: Supplementary file 1270

## Patella 3/Tarsus 4 Length ratio – females

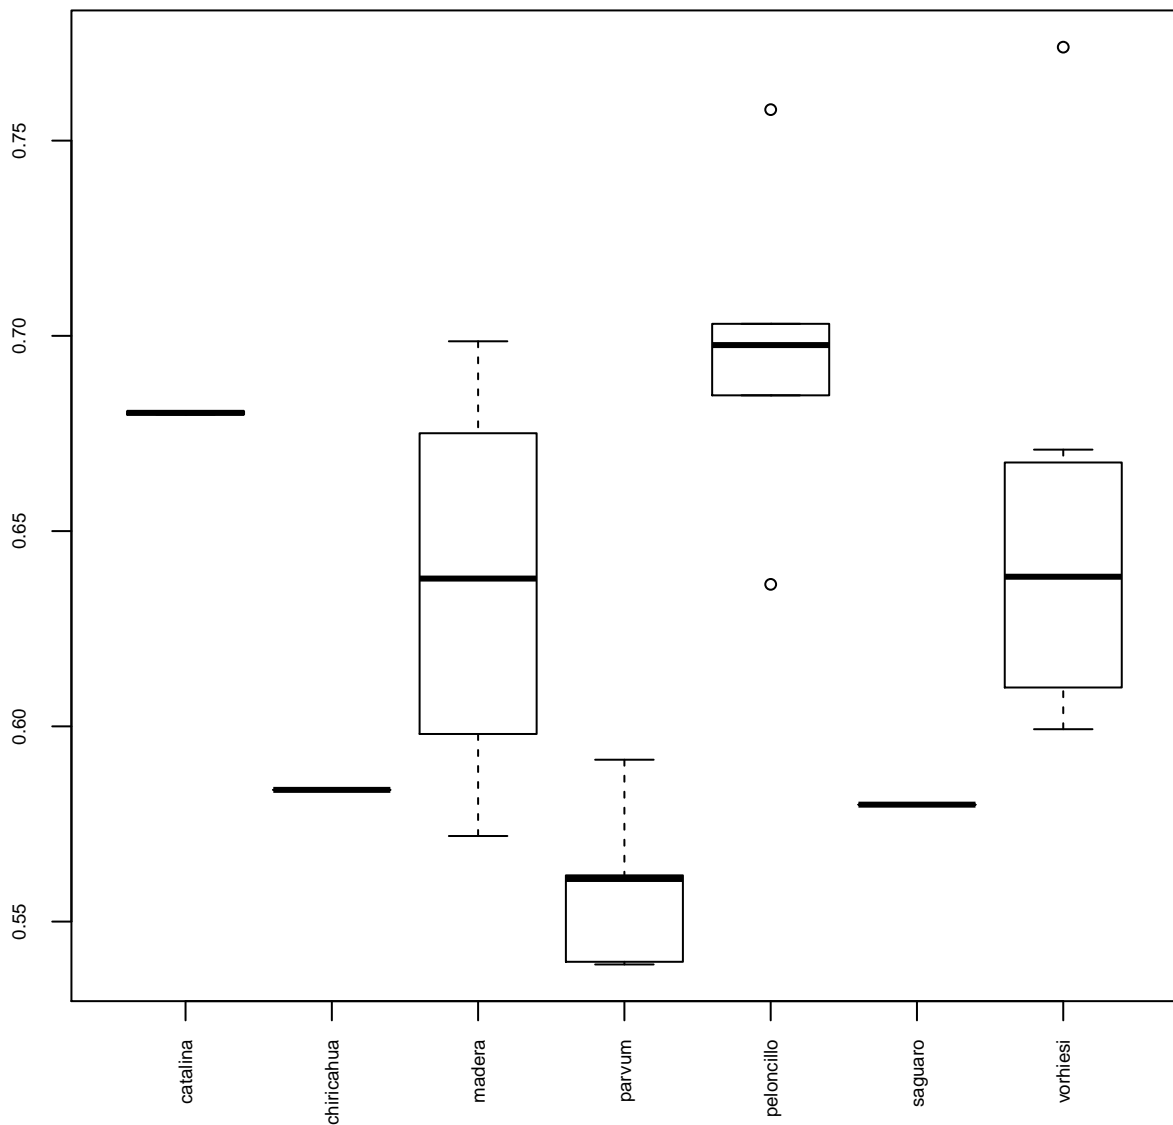

Supplement: Supplementary file 1271

## Femur 1/Tarsus 4 ratio – males

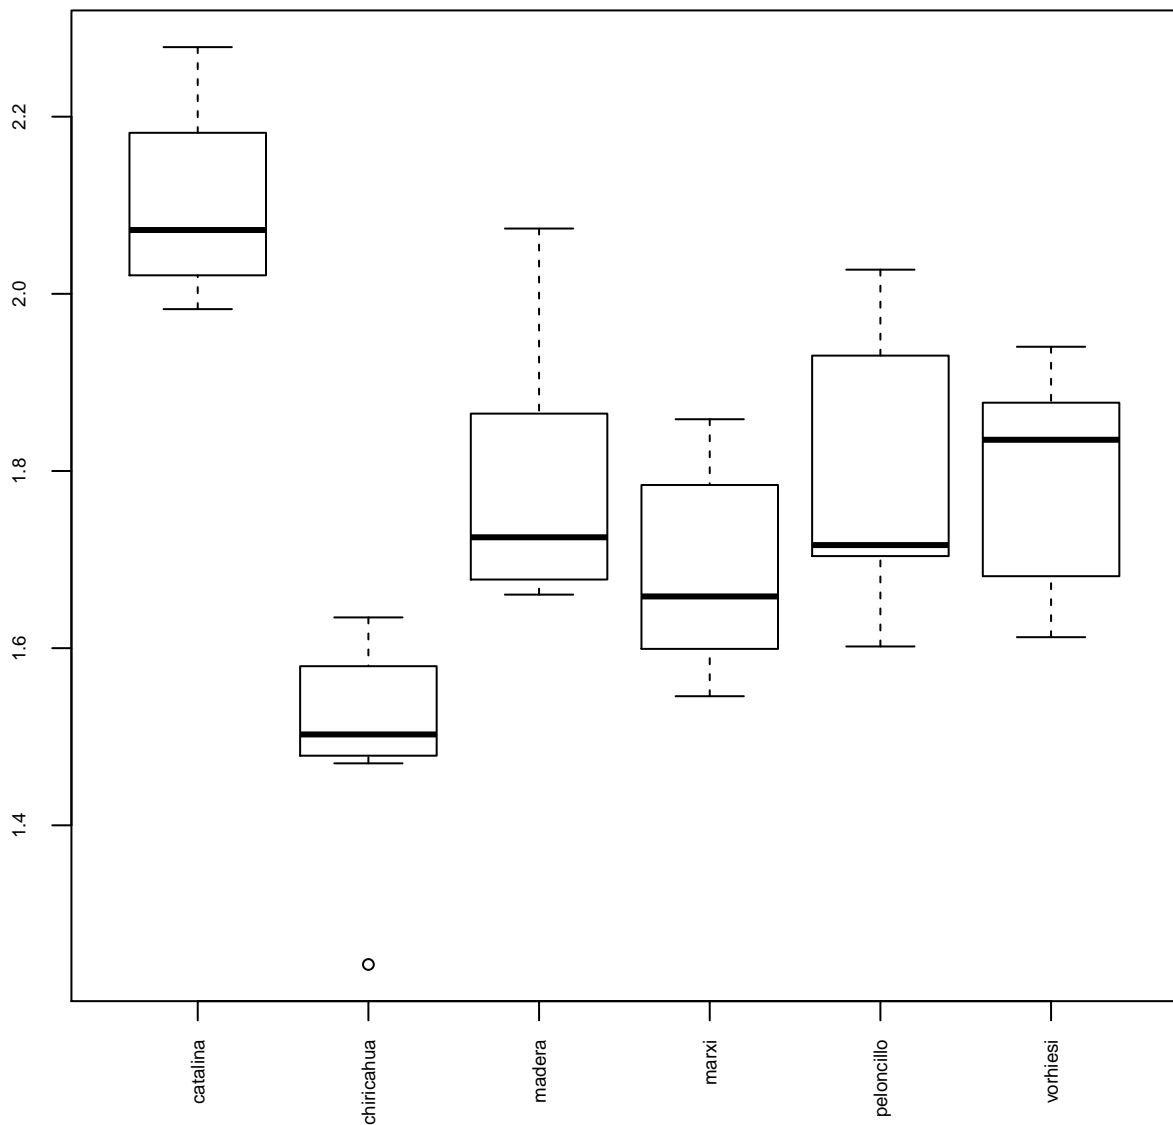

Supplement: Supplementary file 1272

## Patella 4/Tarsus 4 ratio – males

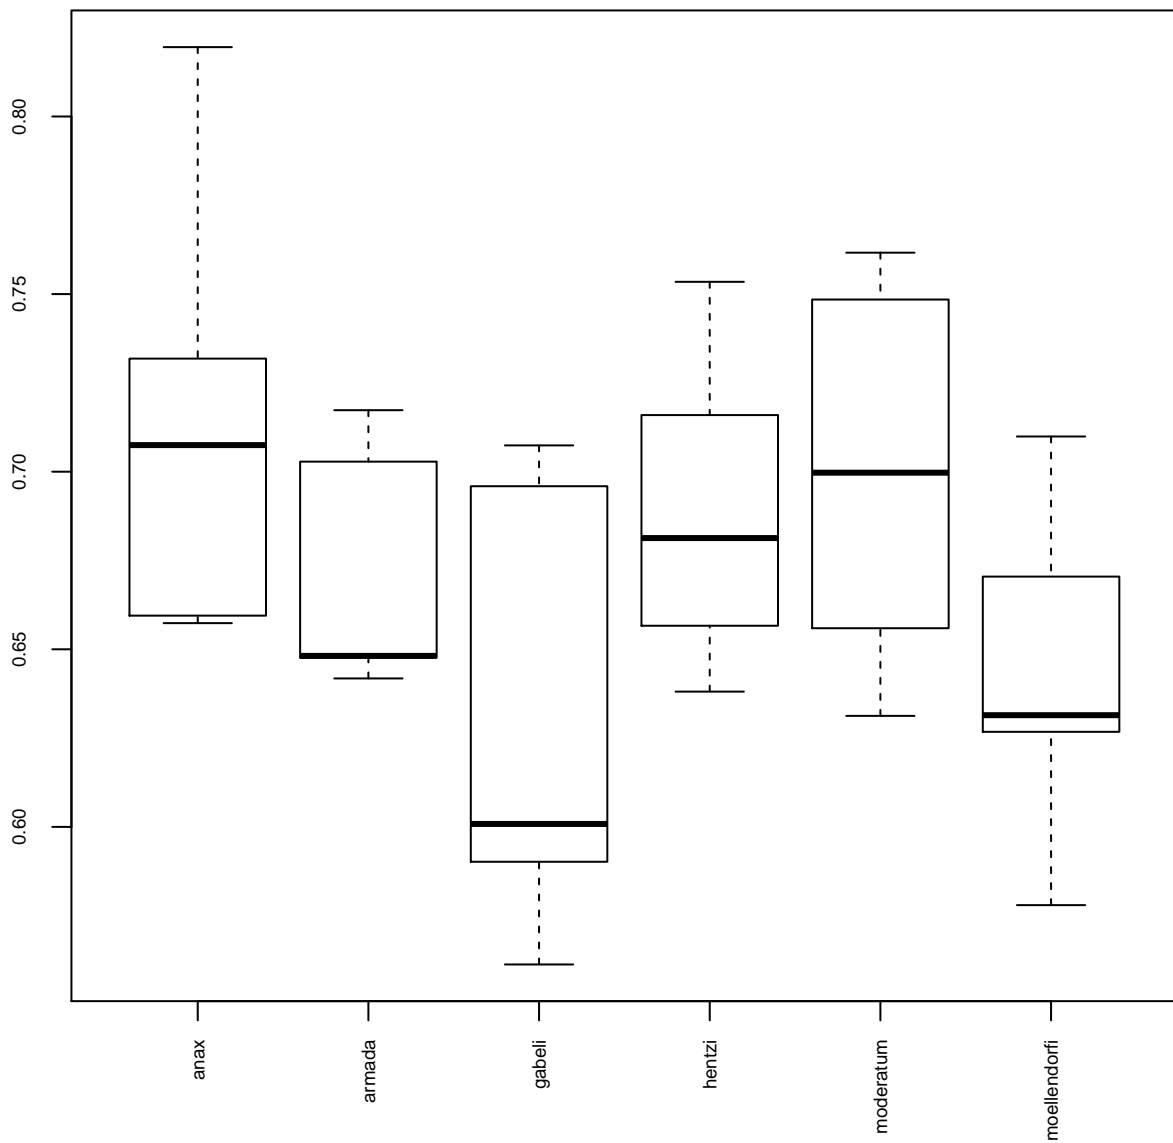

Supplement: Supplementary file 1273

## Femur 1/Metatarsus 1 ratio – females

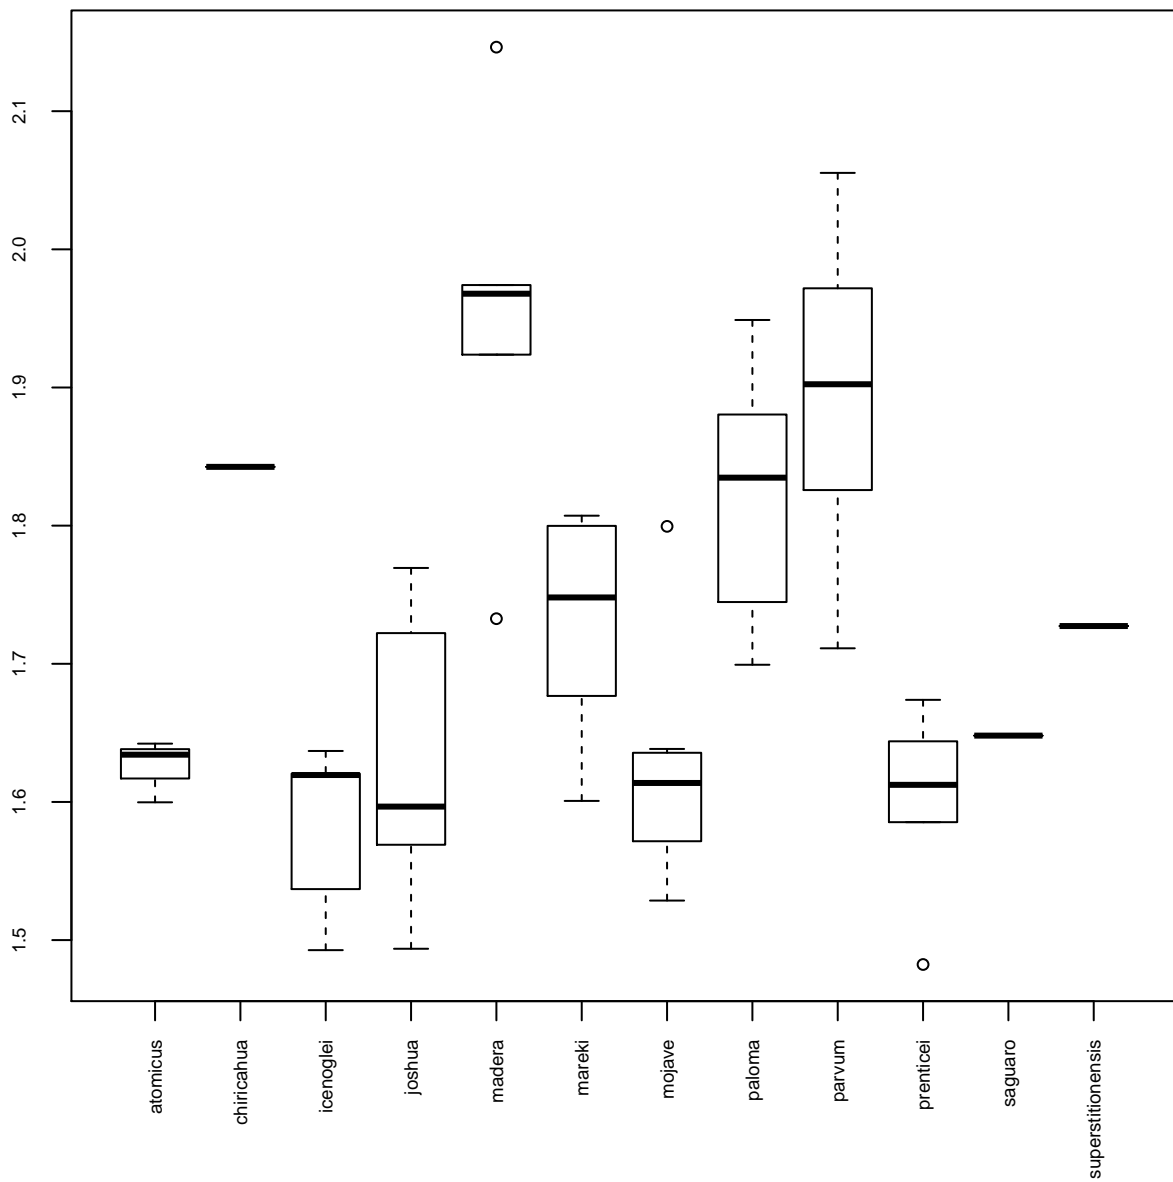

Supplement: Supplementary file 1274

## Tibia 1/Femur 4 Length ratio – males

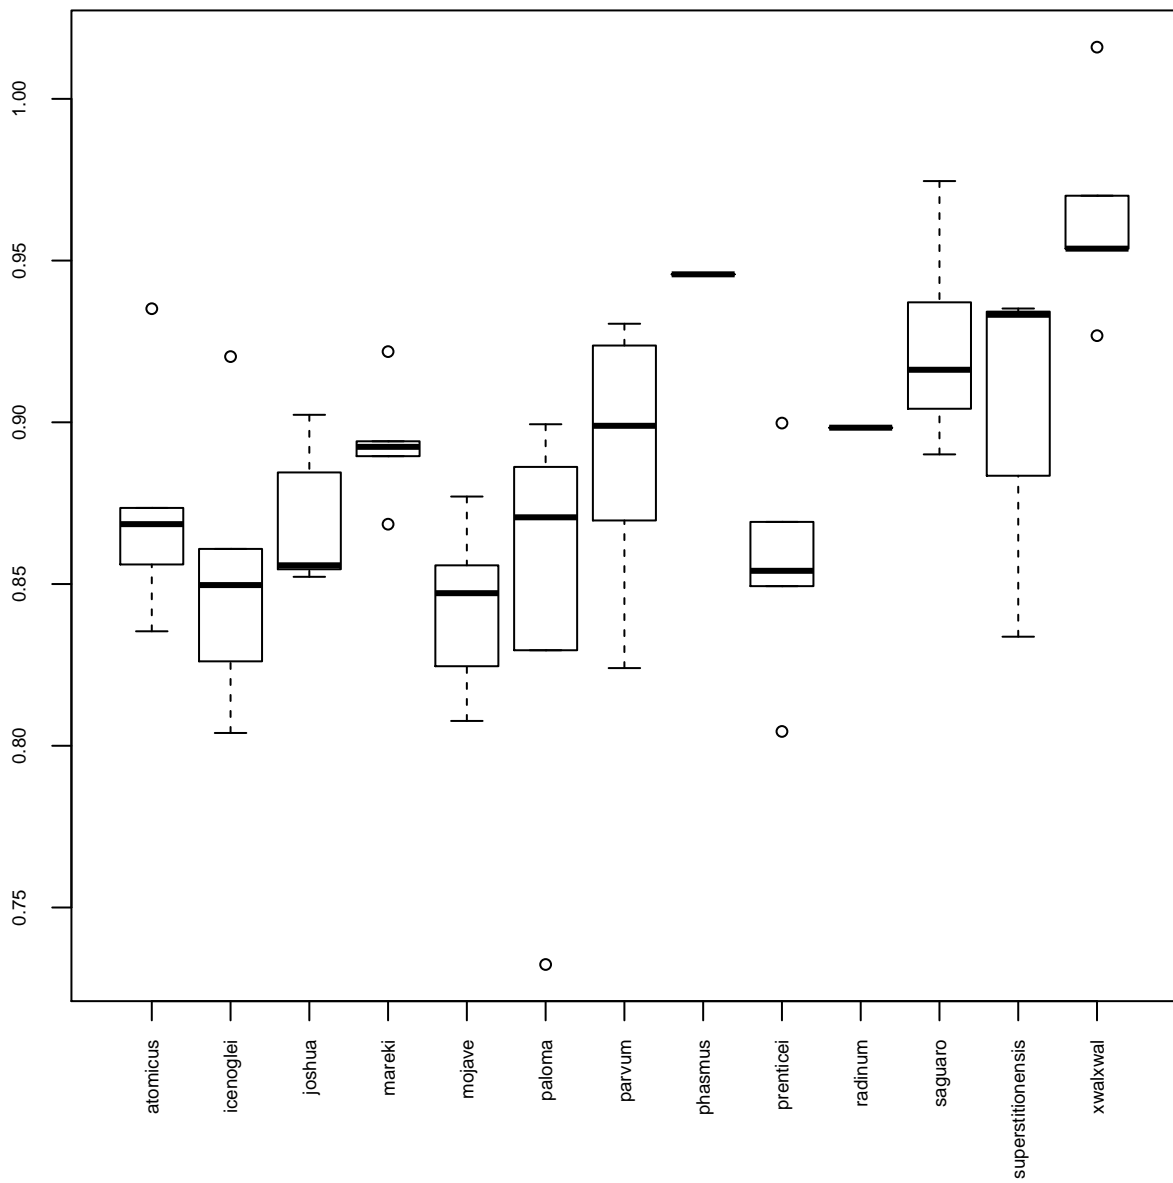

Supplement: Supplementary file 1275

## Palpal Tibia/Metatarsus 3 Length ratio – males

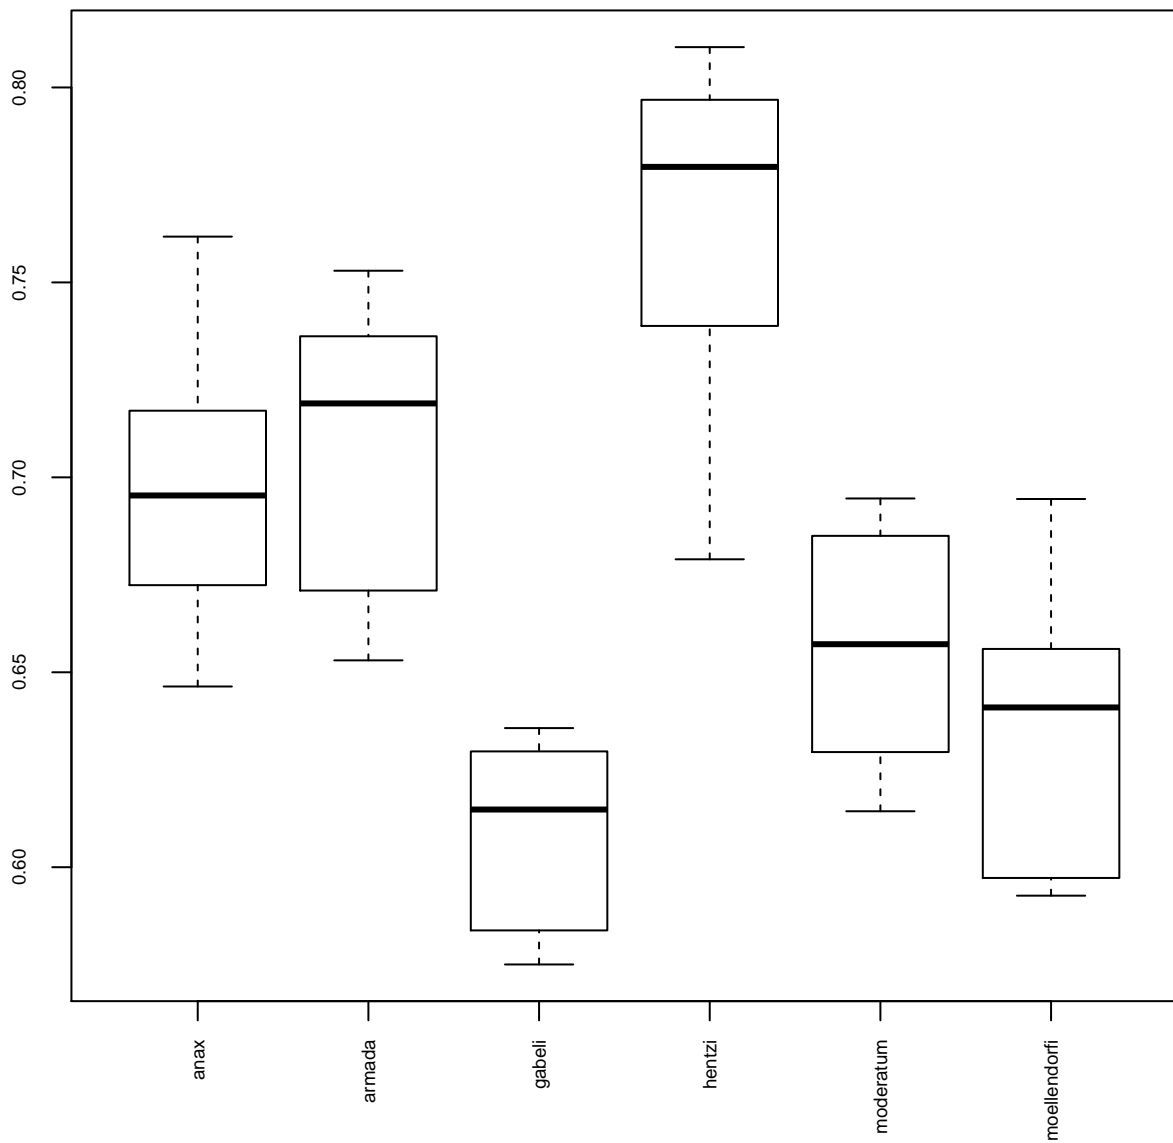

Supplement: Supplementary file 1276

## Tarsus 1/Metatarsus 4 Length ratio – males

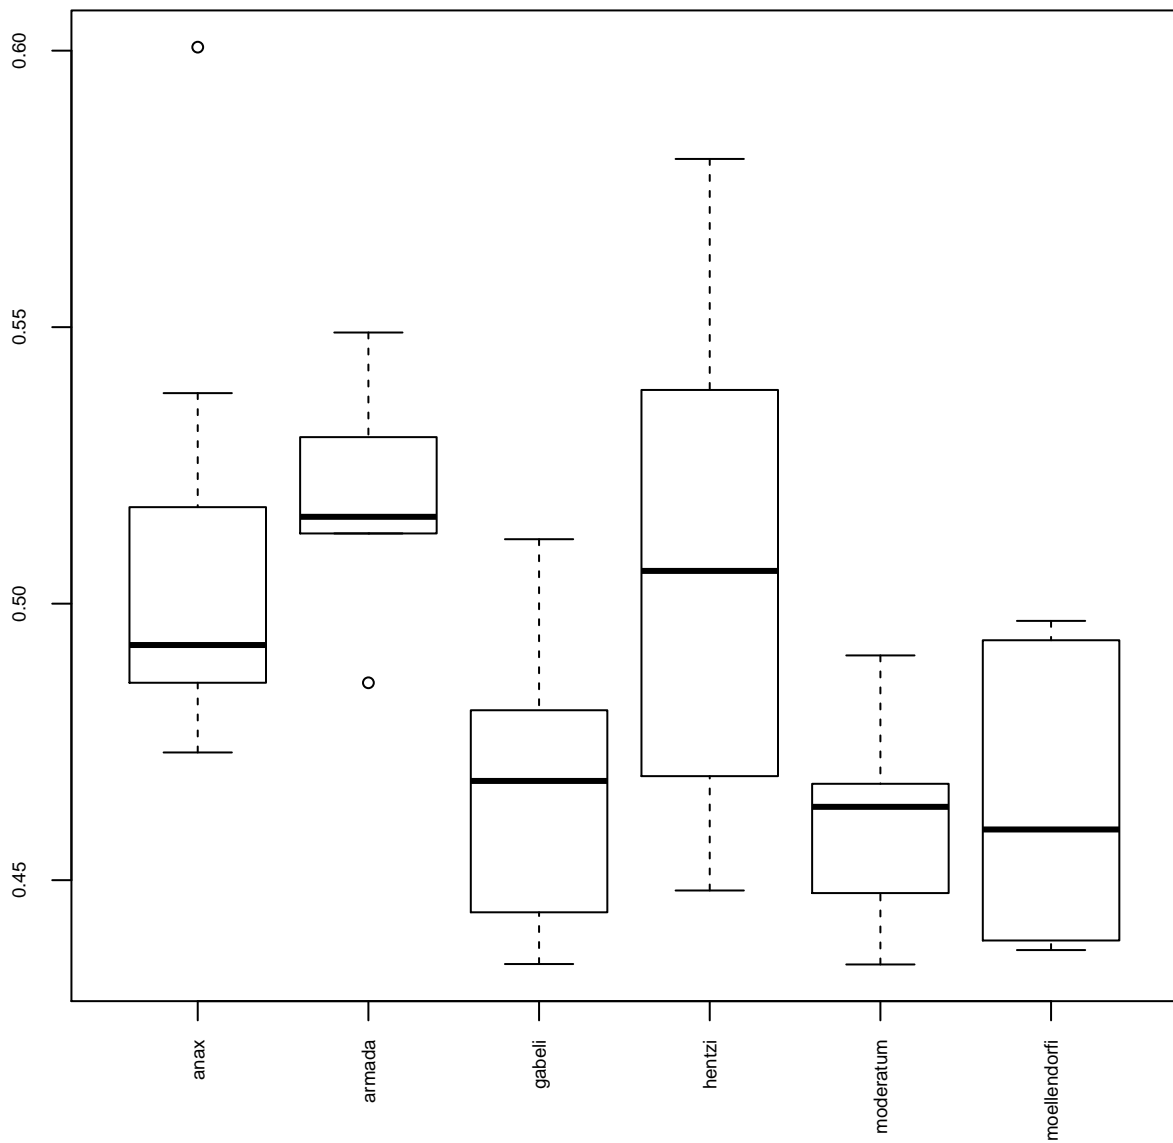

Supplement: Supplementary file 1277

## Leg 4 Scopulation ratio – males

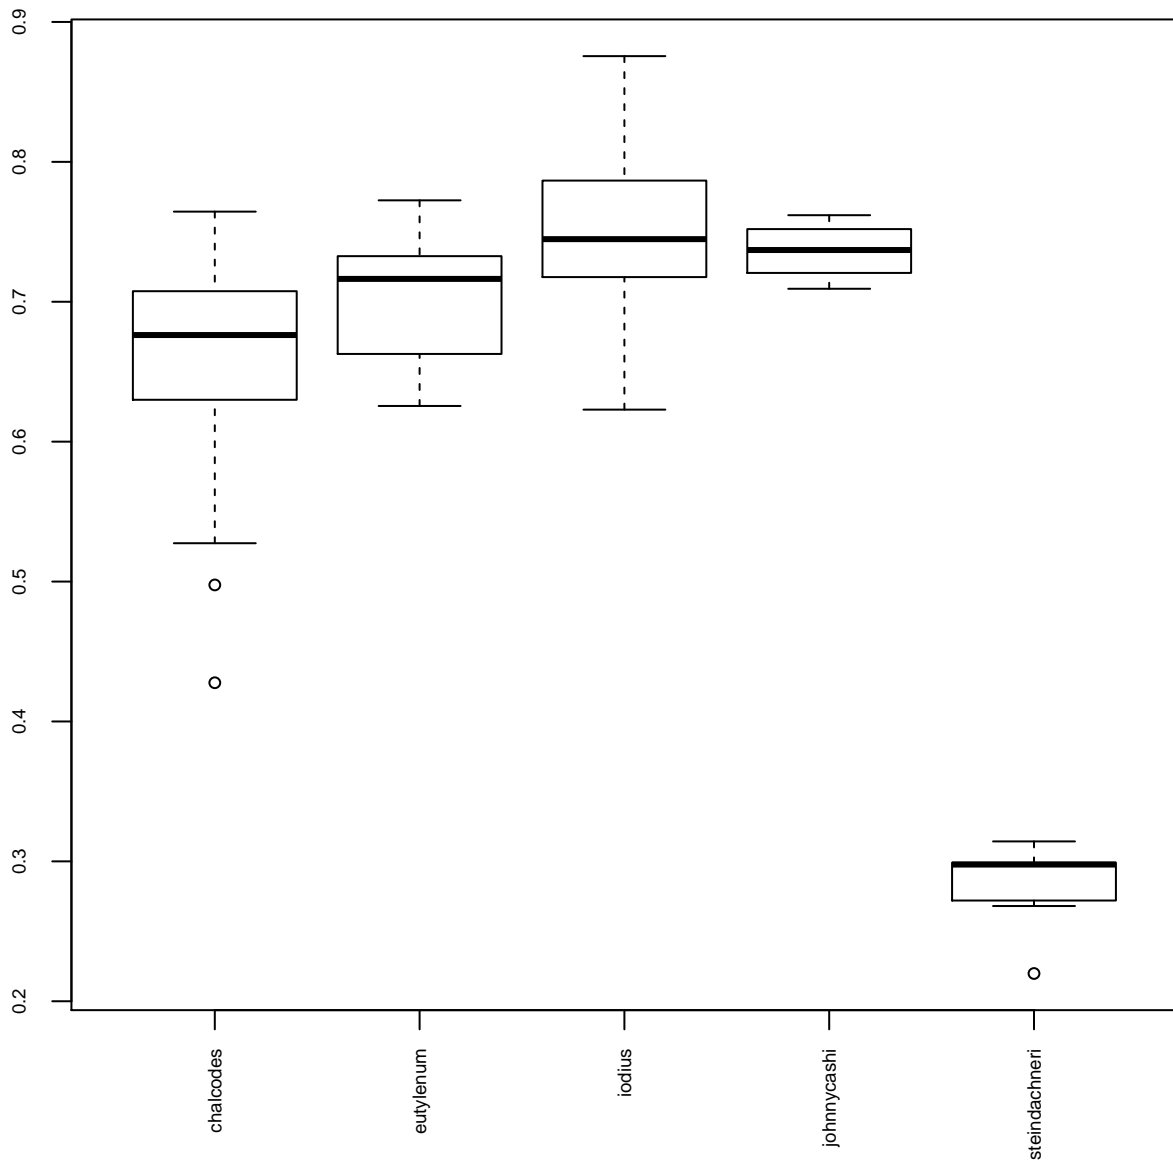

Supplement: Supplementary file 1278

## Tibia 1/Patella 4 Length ratio – females

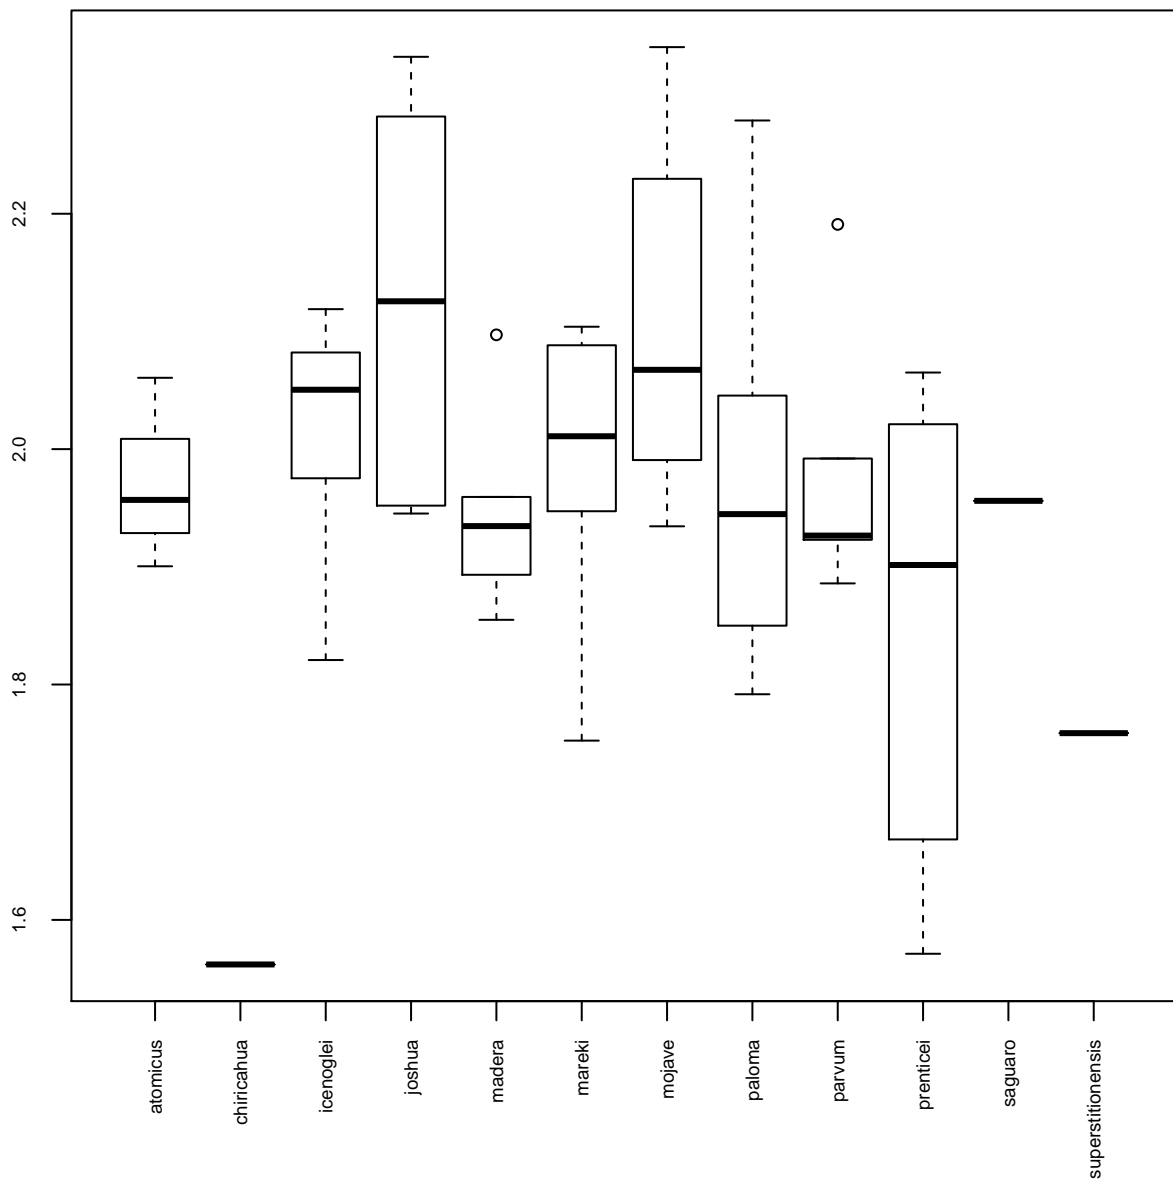

Supplement: Supplementary file 1279

## Tarsus 3/Metatarsus 4 Length ratio – females

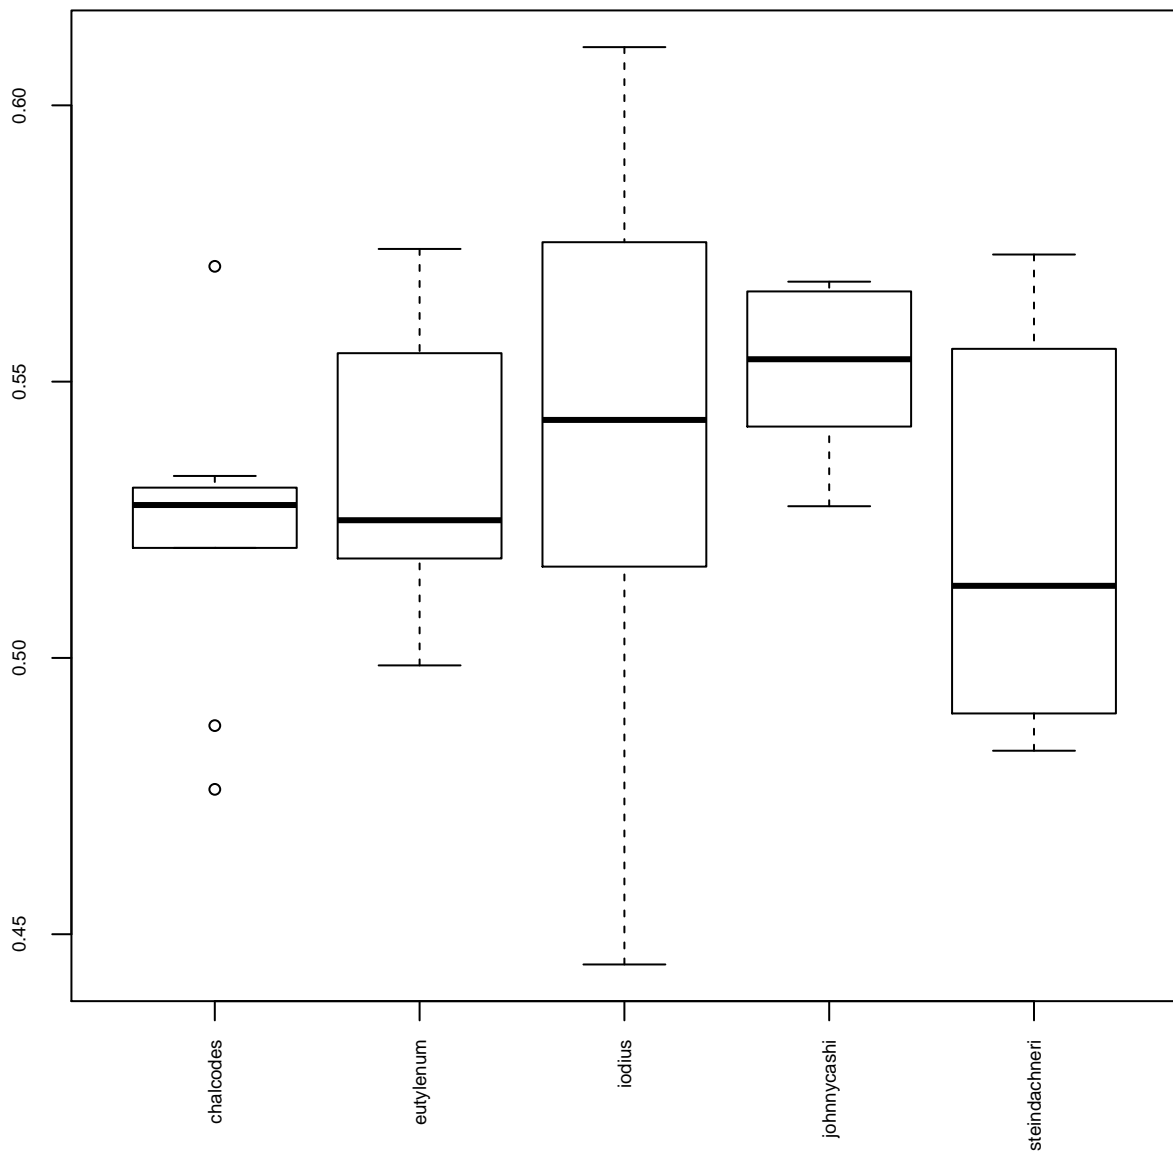

Supplement: Supplementary file 1280

# Metatarsus 1/Tarsus 1 ratio – males

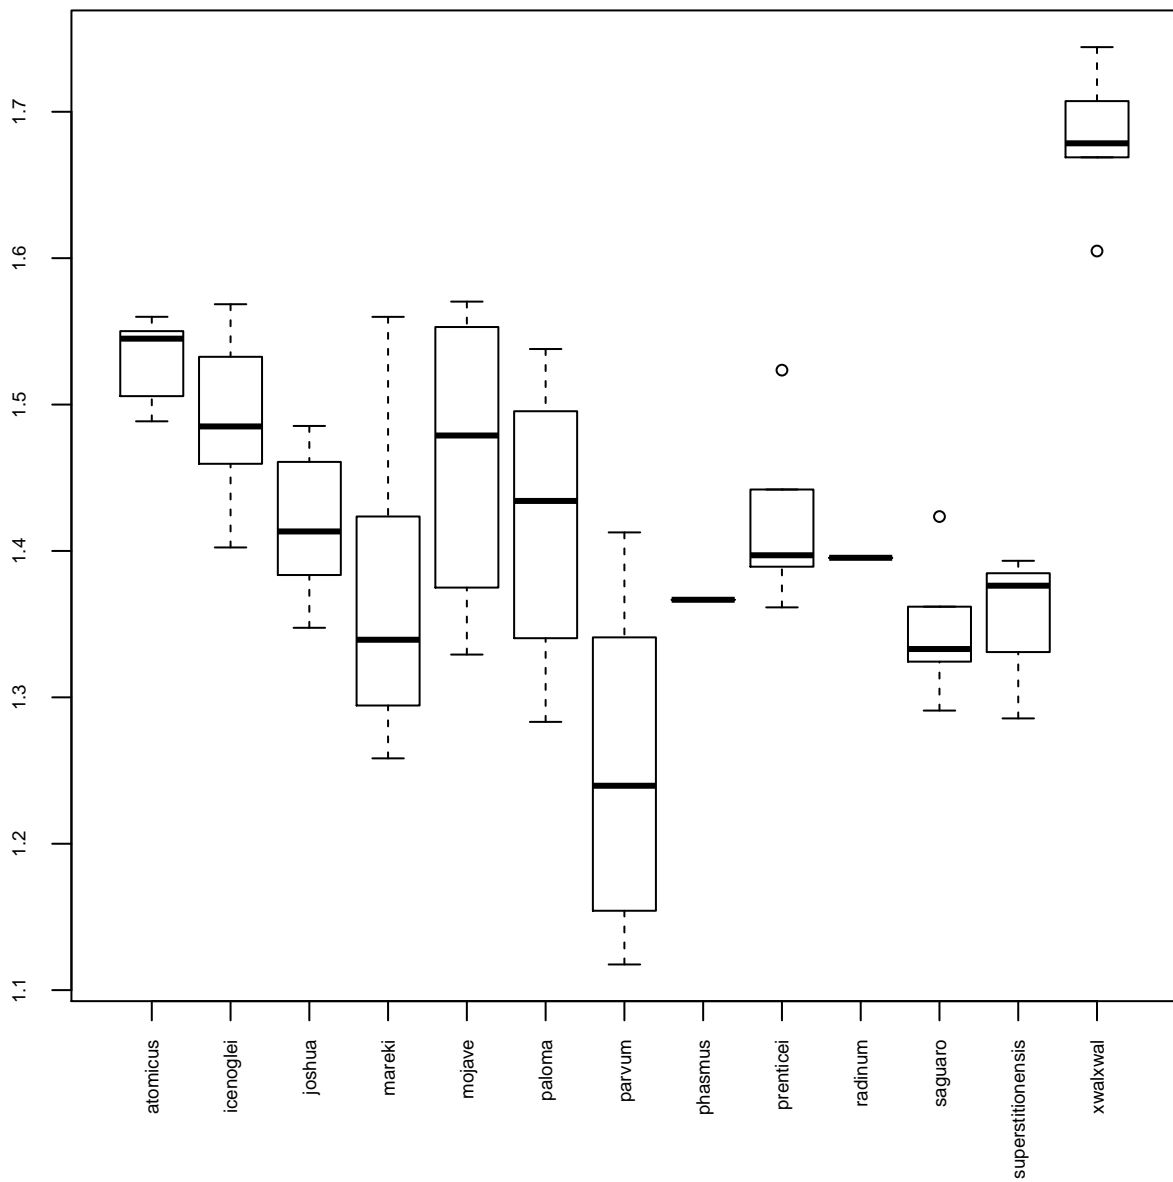

Supplement: Supplementary file 1281

## Femur 1/Metatarsus 3 ratio – males

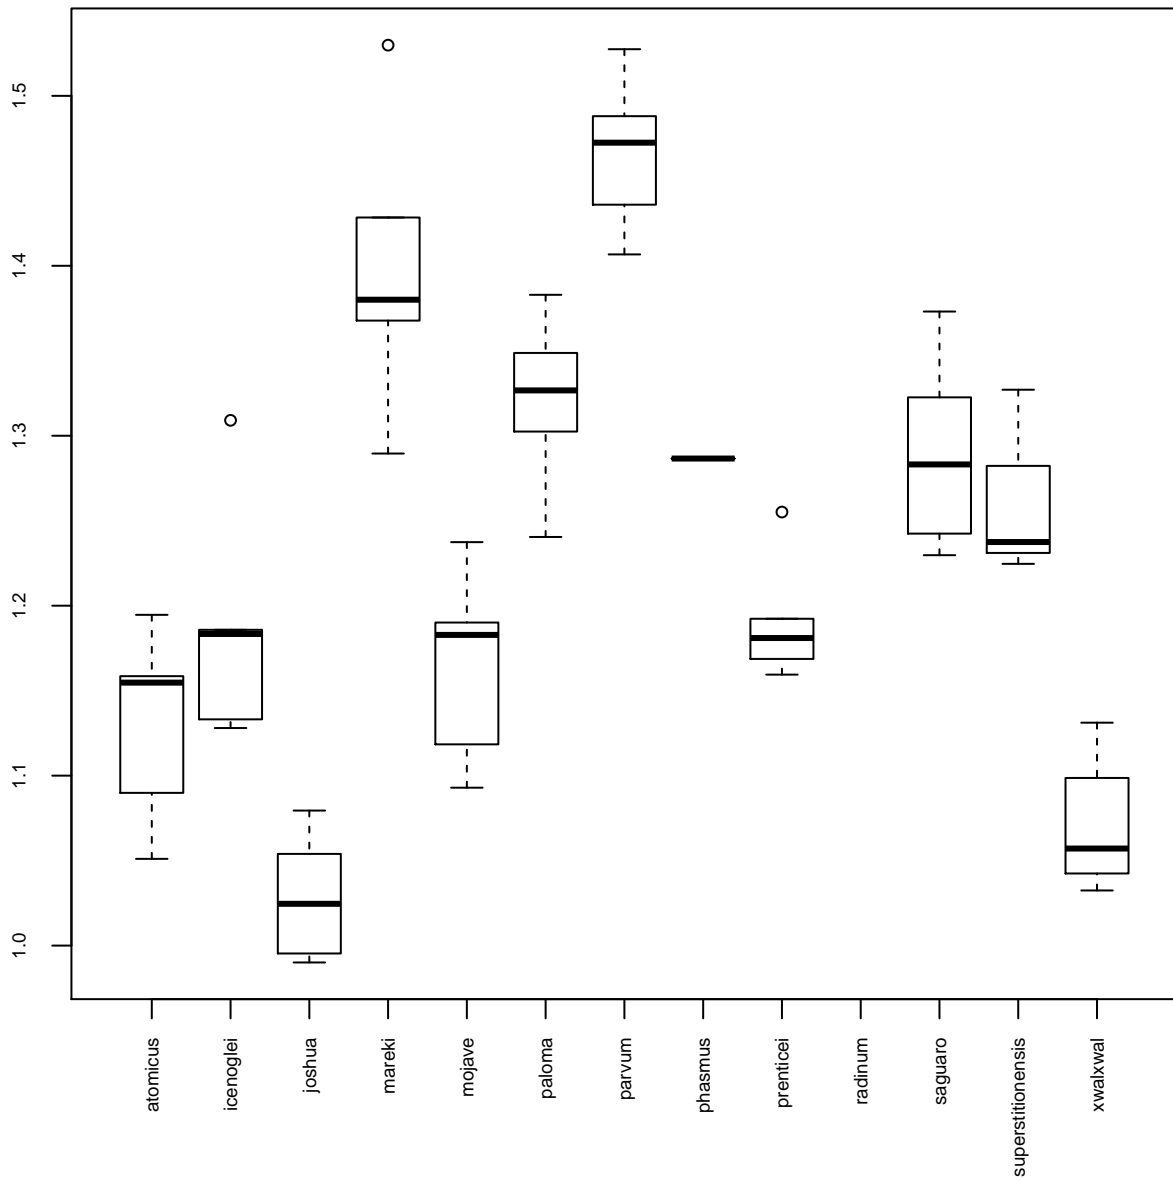

Supplement: Supplementary file 1282

## Carapace Width – females

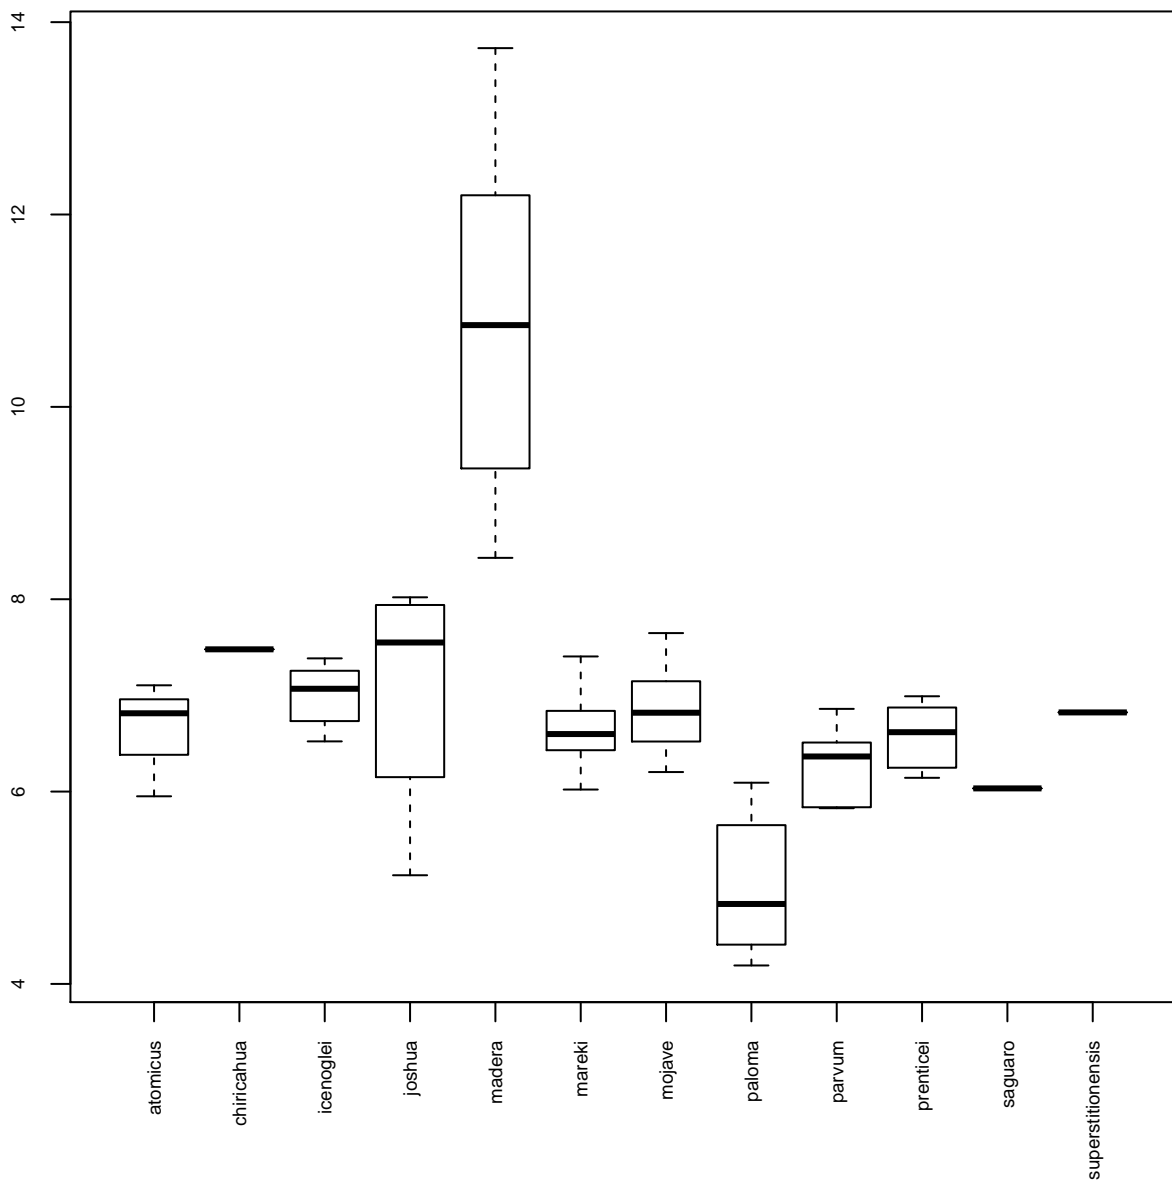

Supplement: Supplementary file 1283

## Labial Length/Width ratio – males

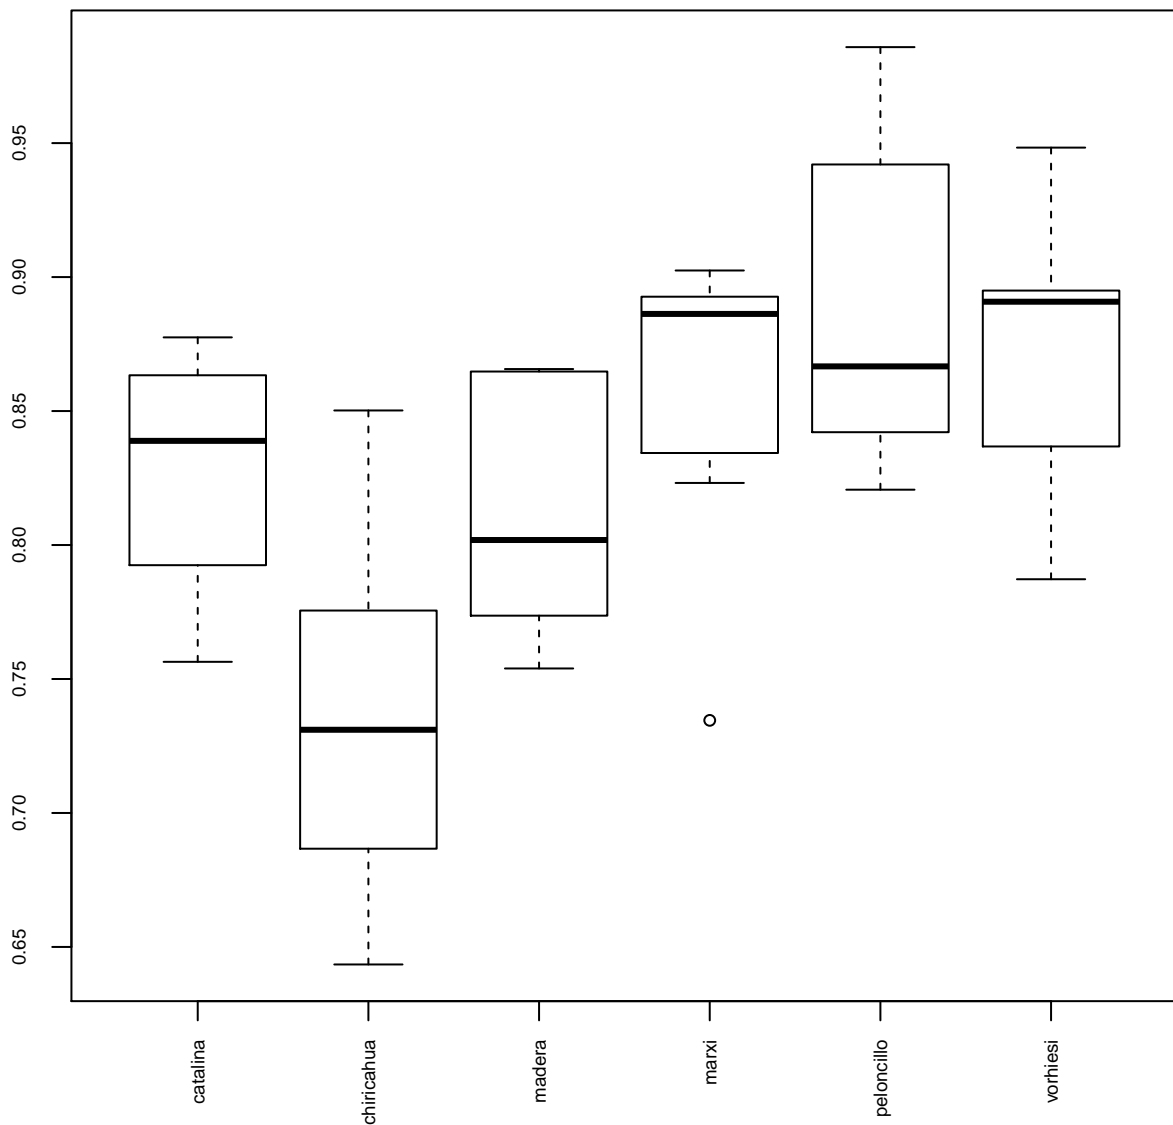

Supplement: Supplementary file 1284

# Tibia 1/Tibia 4 ratio – females

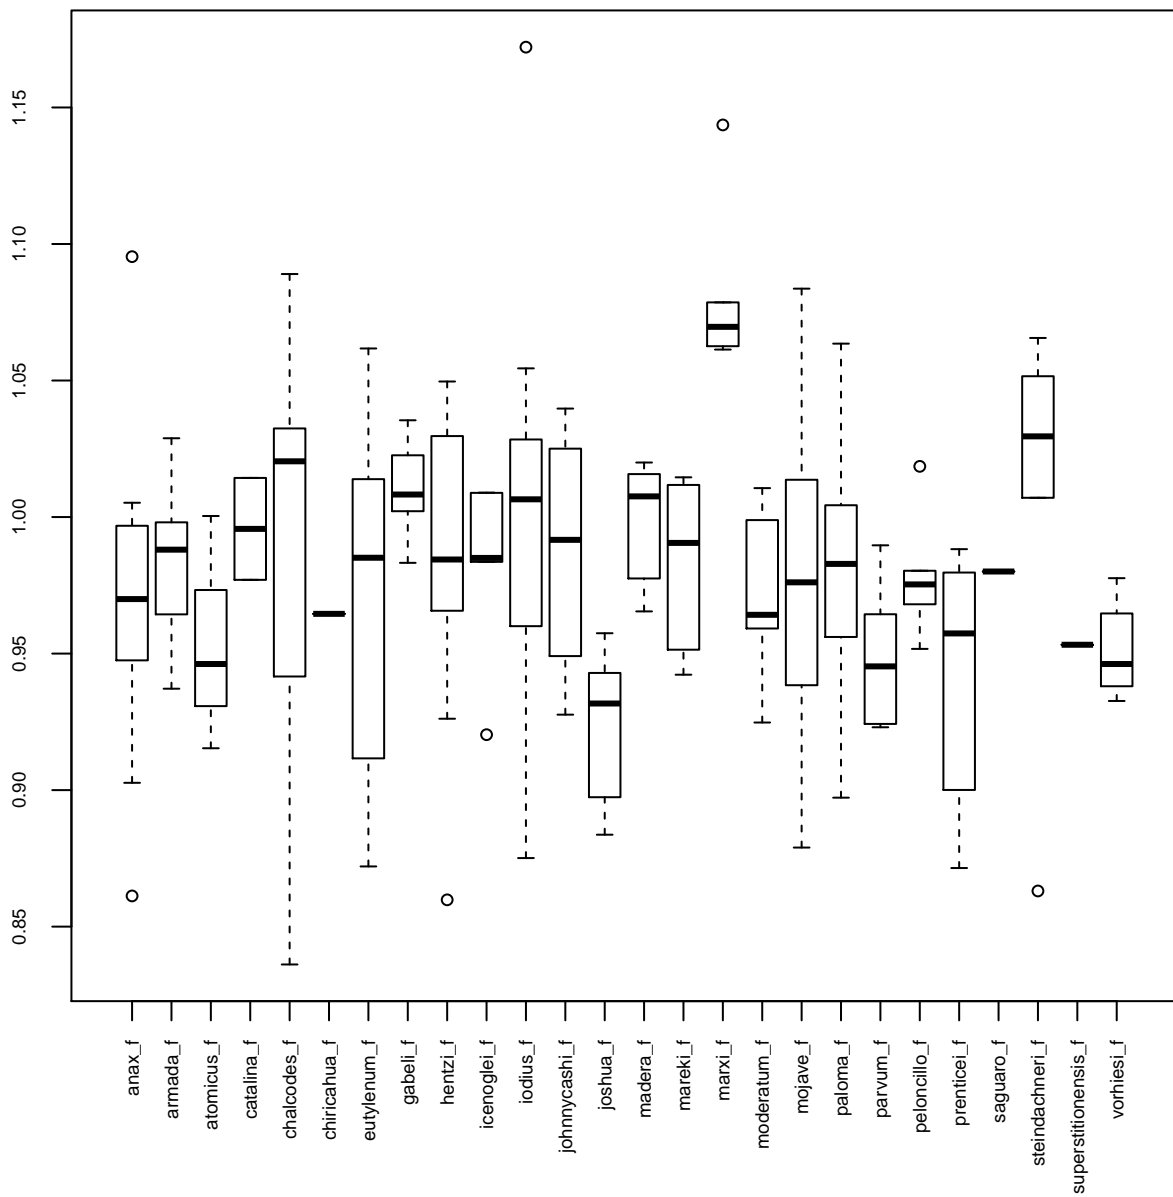

Supplement: Supplementary file 1285

## Patella 1/Tibia 4 Length ratio – females

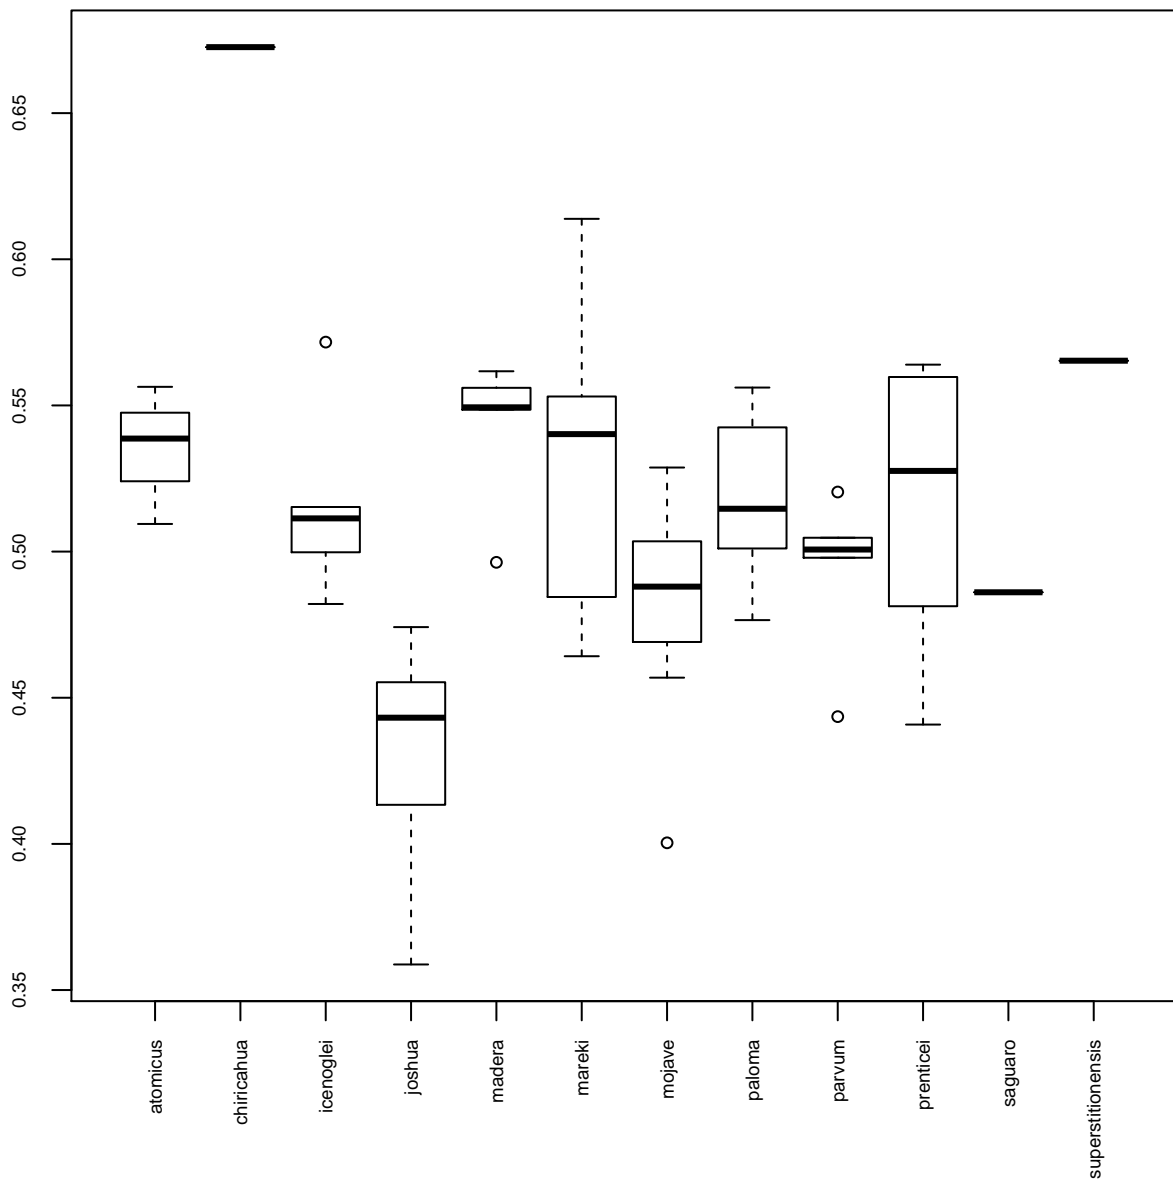

Supplement: Supplementary file 1286

## Carapace Length/Tarsus 3 ratio – females

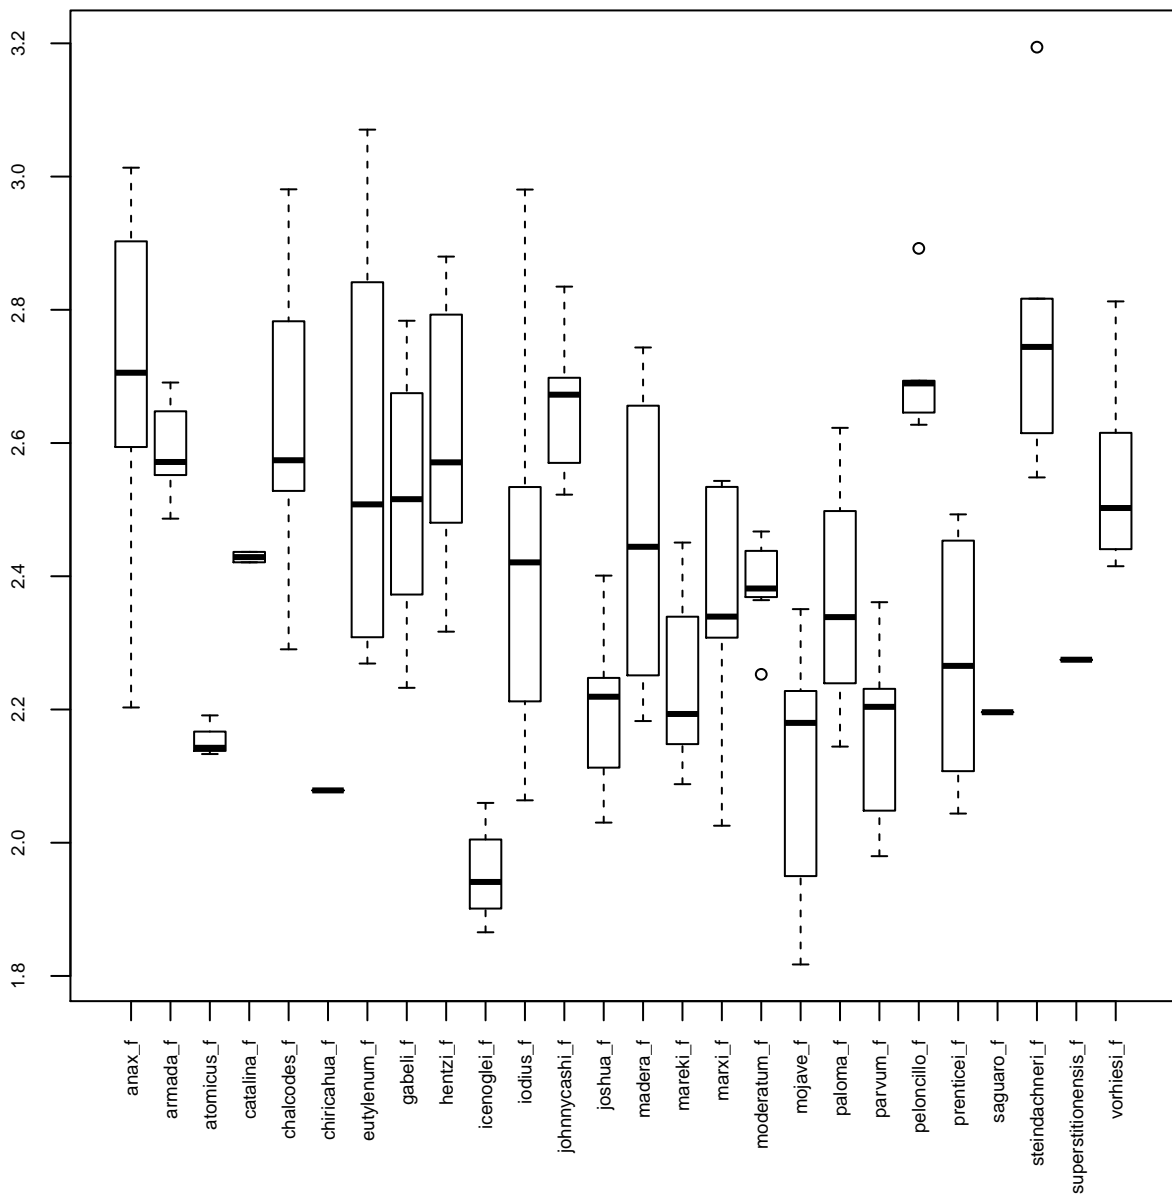

Supplement: Supplementary file 1287

## Leg 3 Length/Carapace Length ratio – males

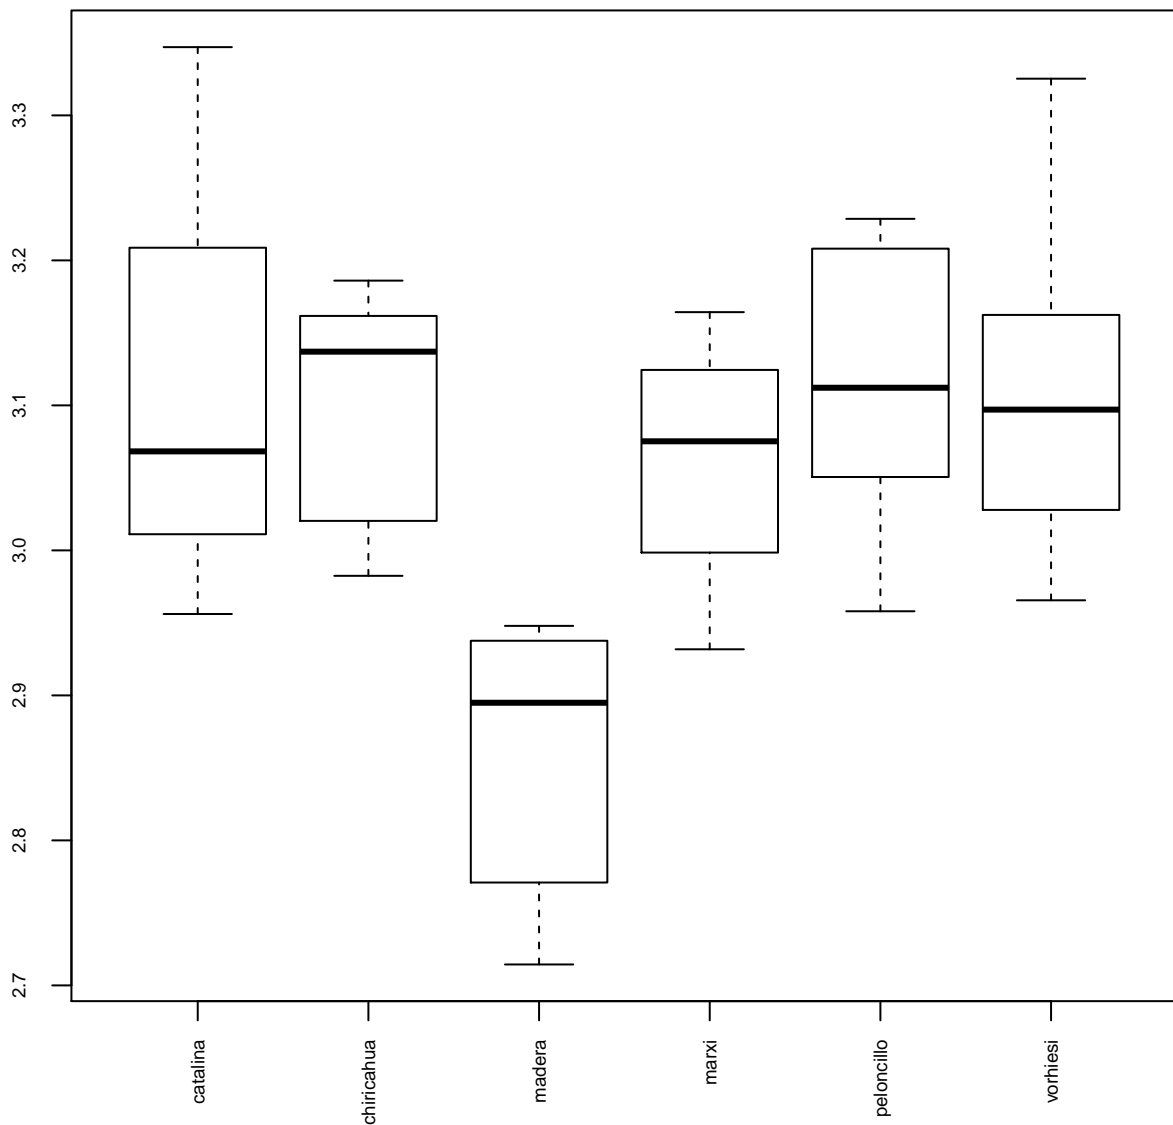

Supplement: Supplementary file 1288

## Palpal Tibia/Metatarsus 1 Length ratio – males

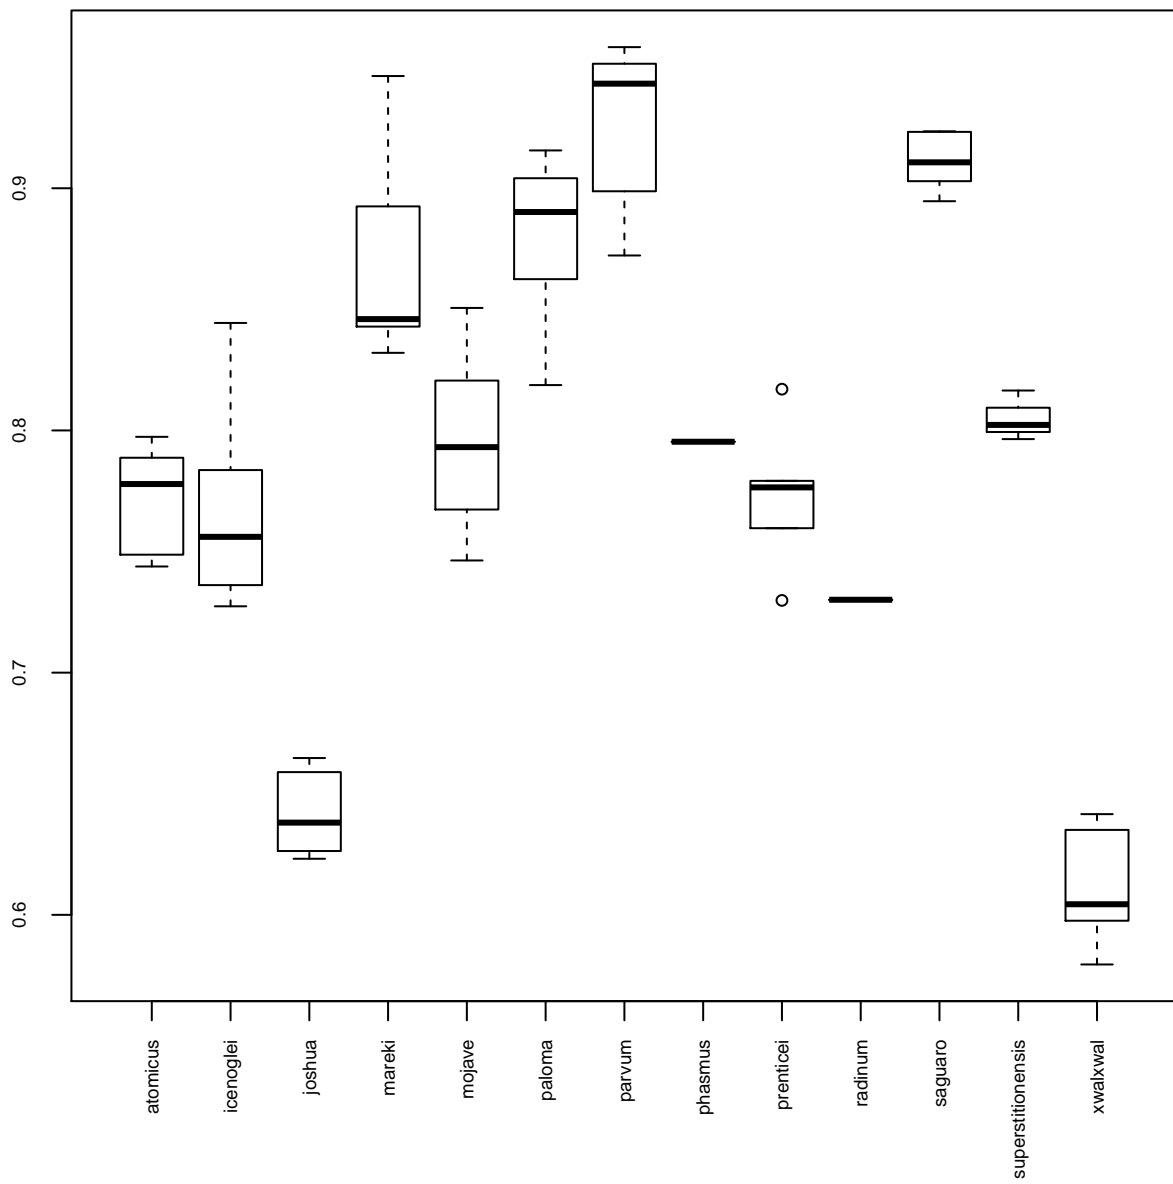

Supplement: Supplementary file 1289

## Patella 1/Patella 3 ratio – females

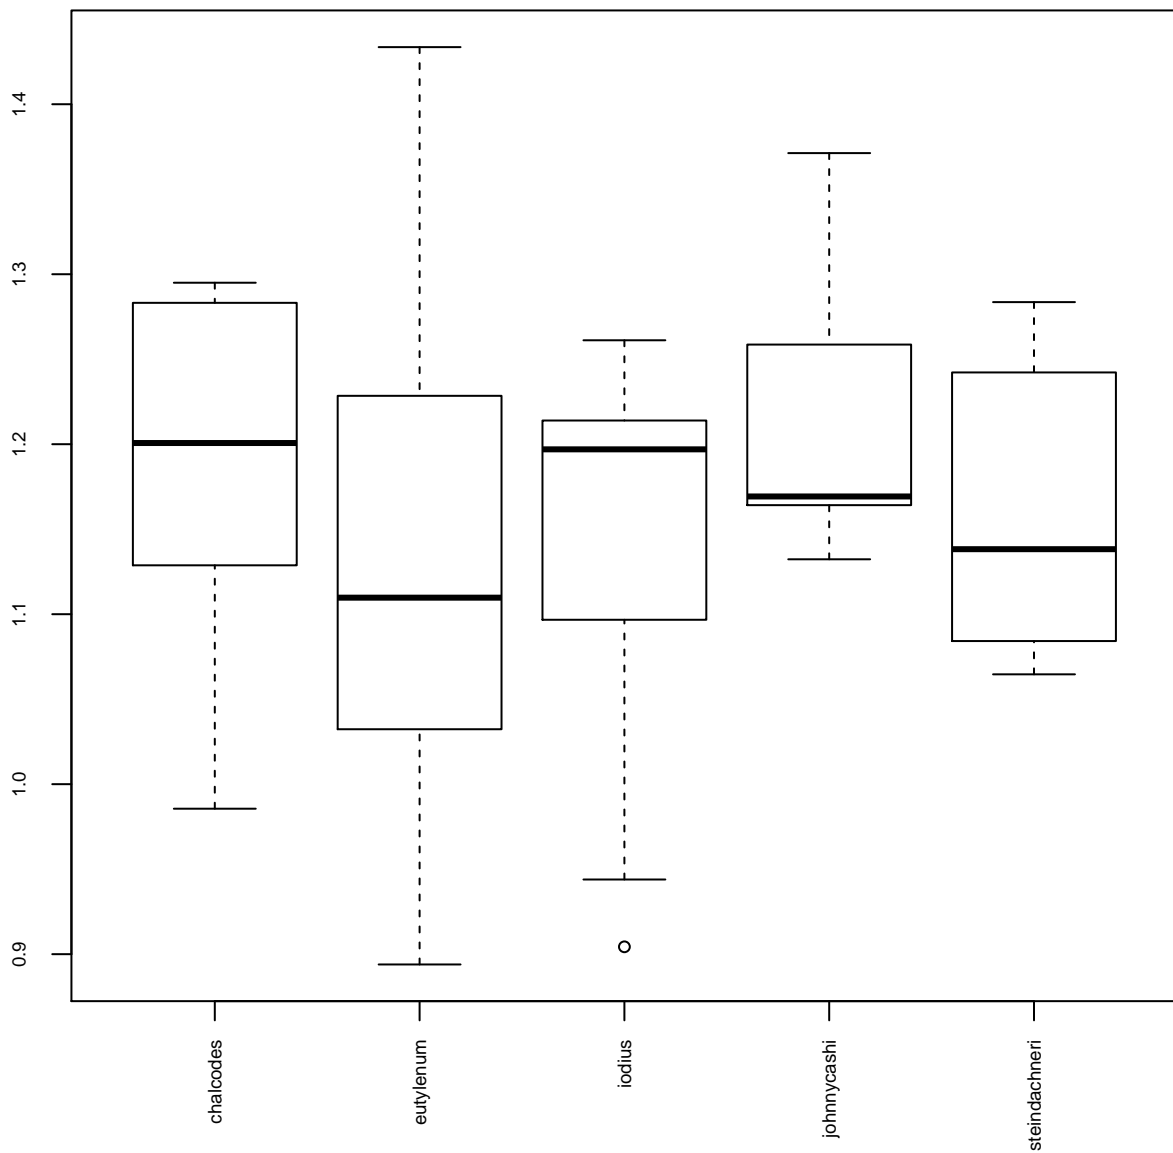

Supplement: Supplementary file 1290

## Patella 3/Tarsus 4 Length ratio – males

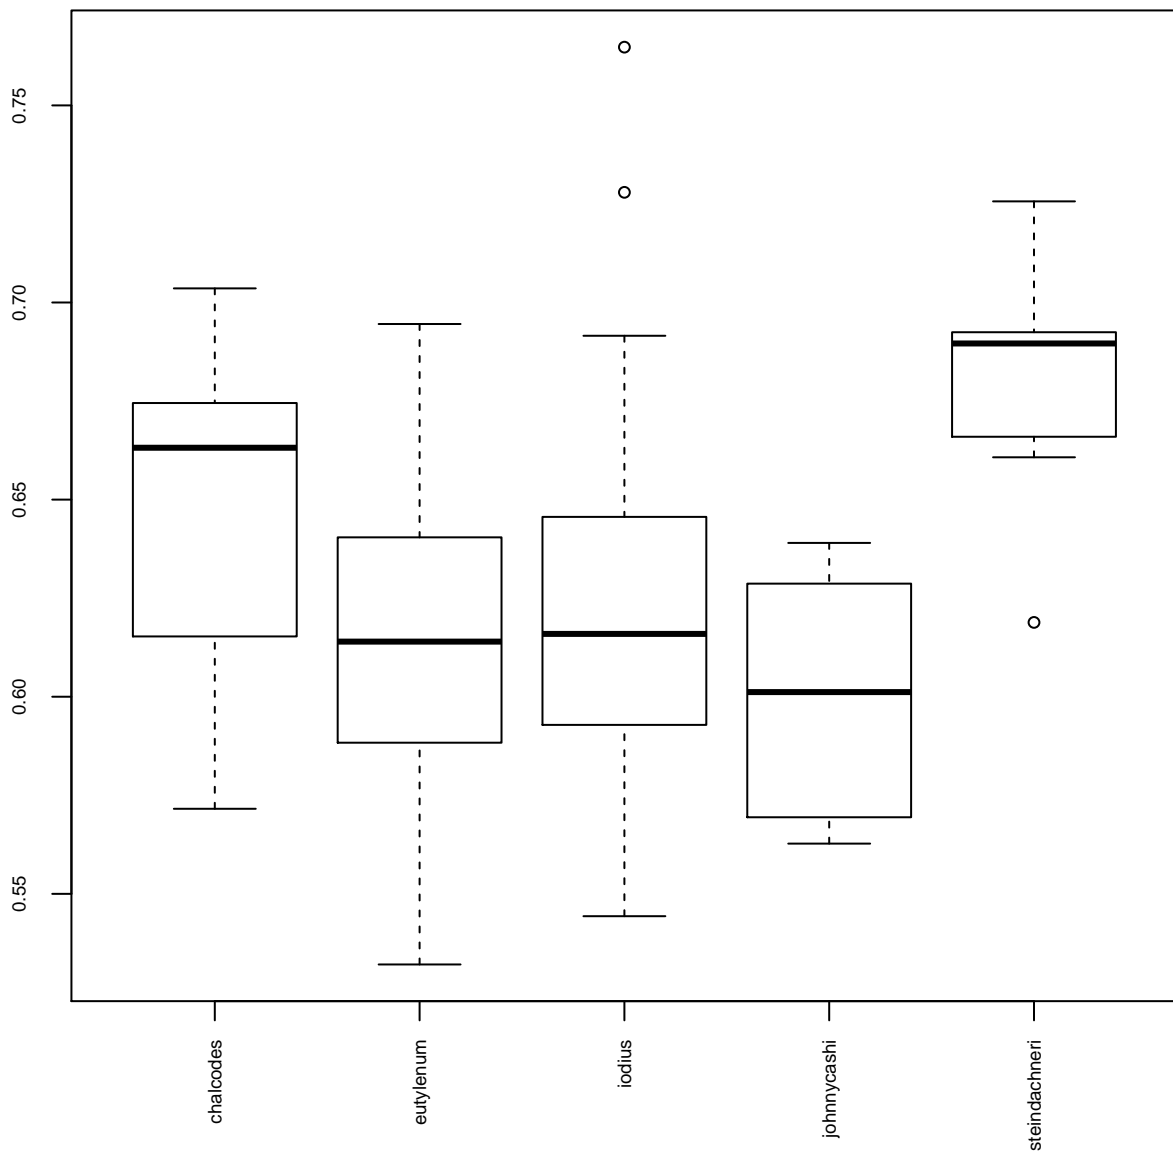

Supplement: Supplementary file 1291

## Labial Length/Width ratio – males

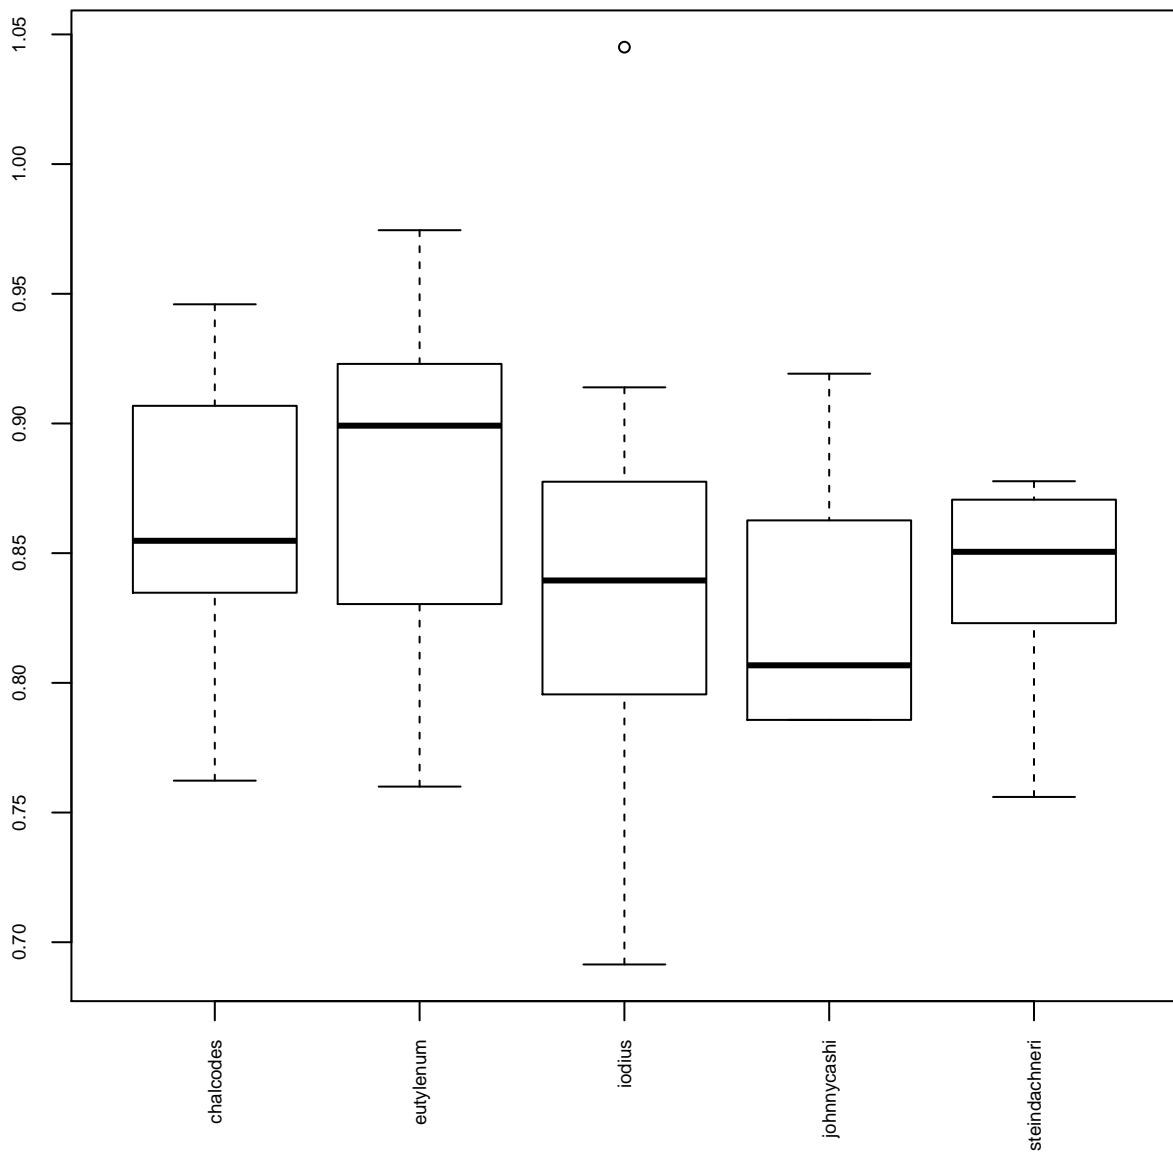

Supplement: Supplementary file 1292

## Leg 3 Length – males

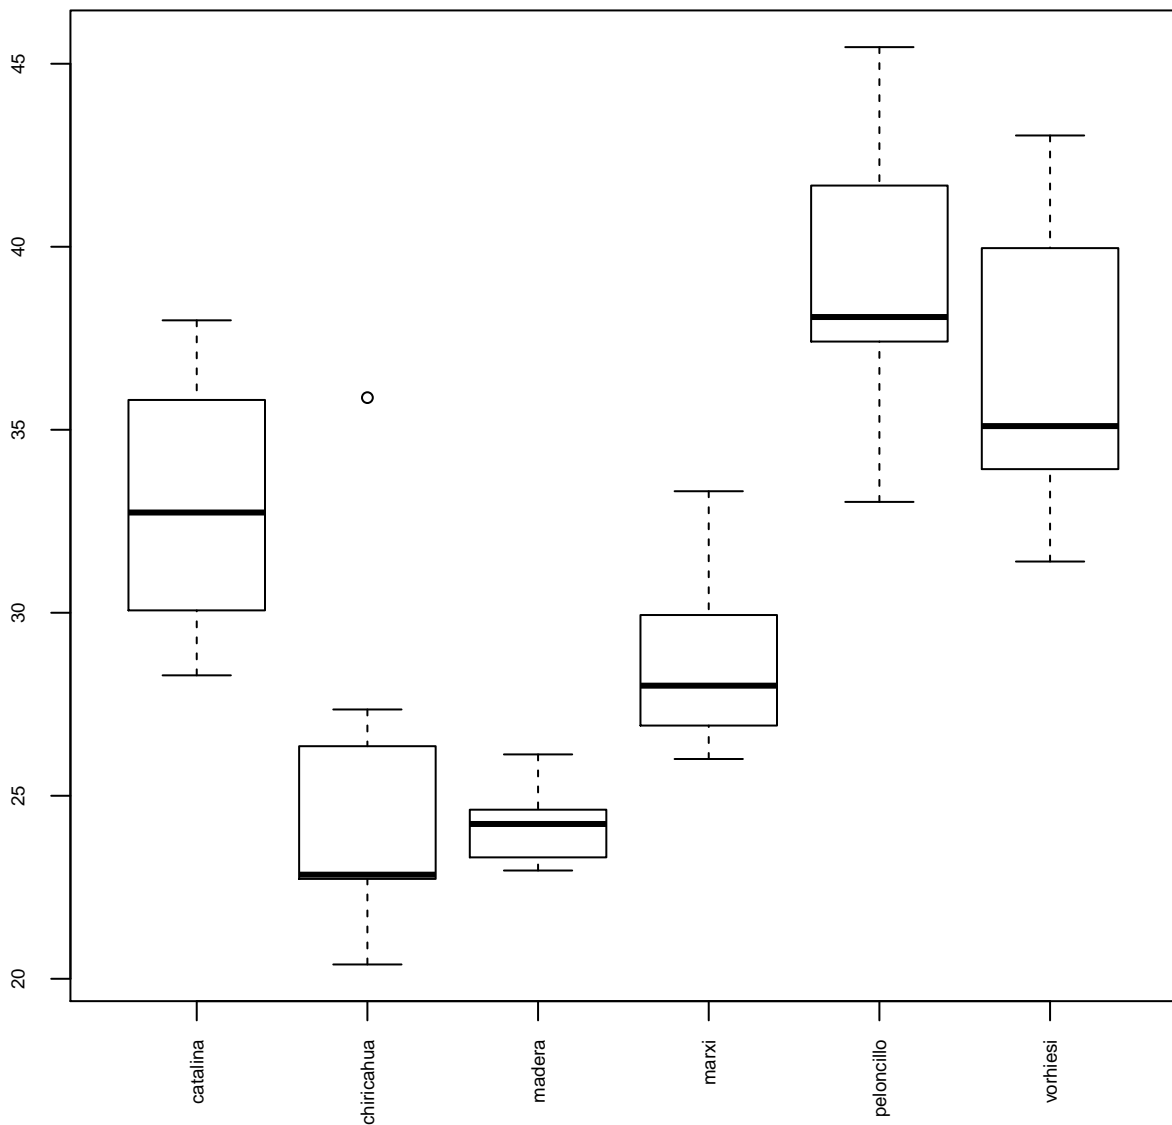

Supplement: Supplementary file 1293

# Tarsus 3/Tibia 4 Length ratio – males

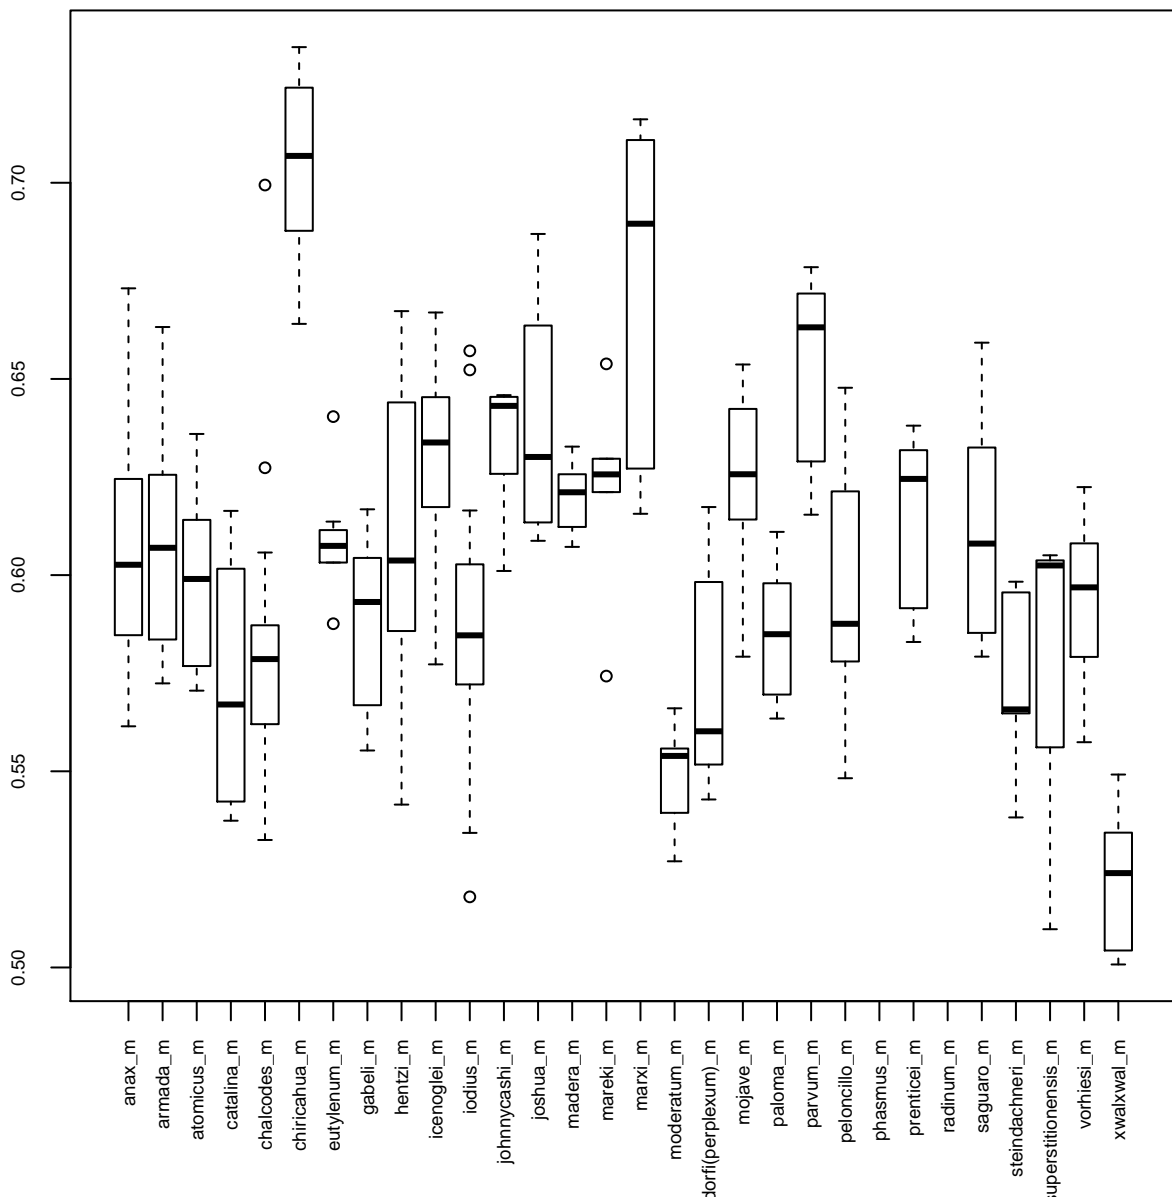

Supplement: Supplementary file 1294

## Tarsus 3/Tibia 4 Length ratio – males

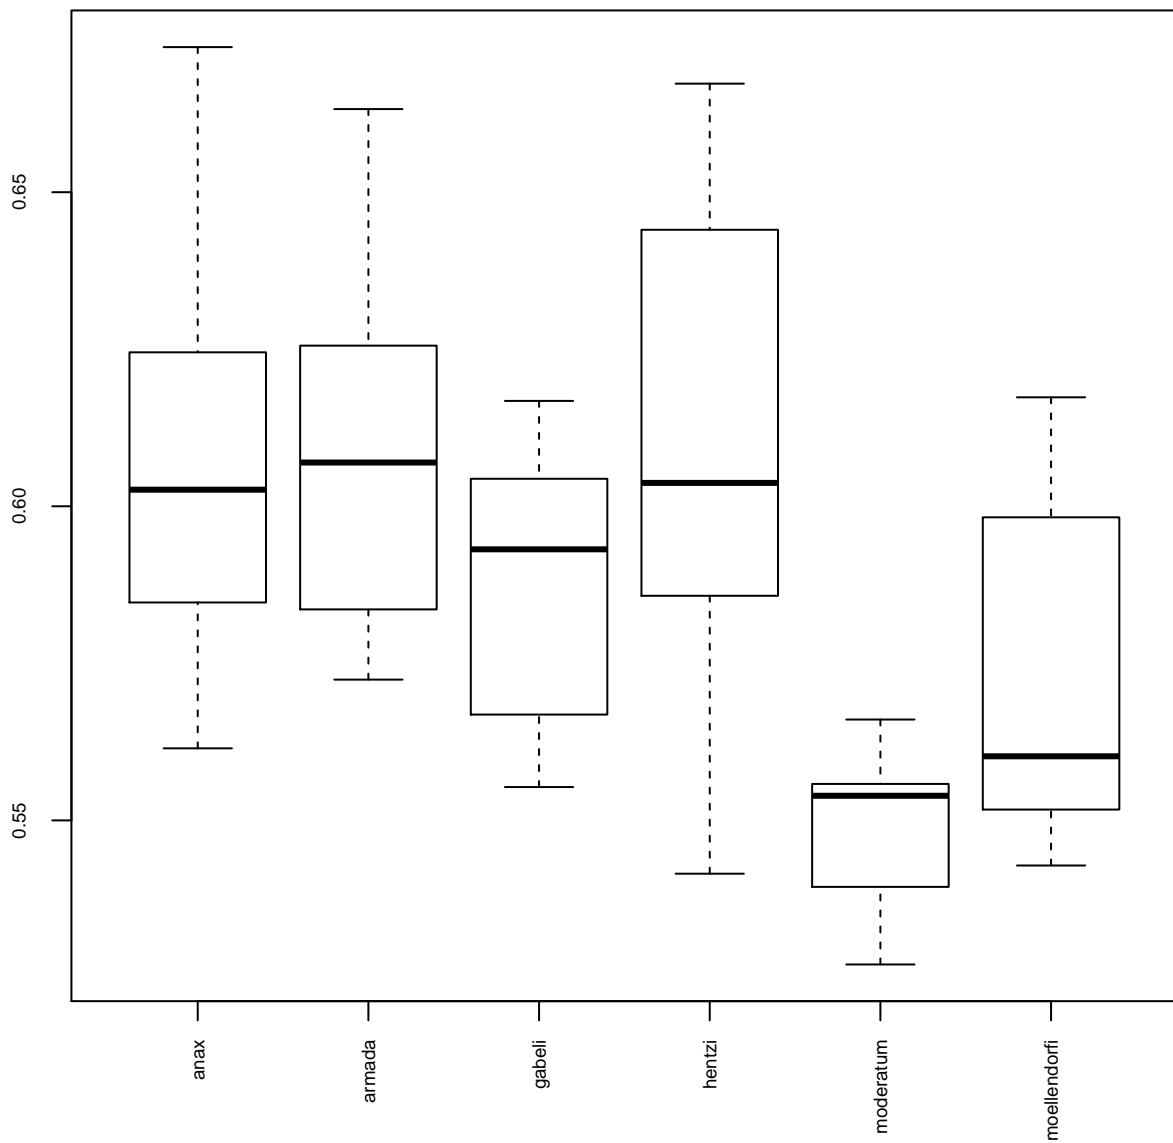

Supplement: Supplementary file 1295

## Tibia 1/Femur 3 Length ratio – males

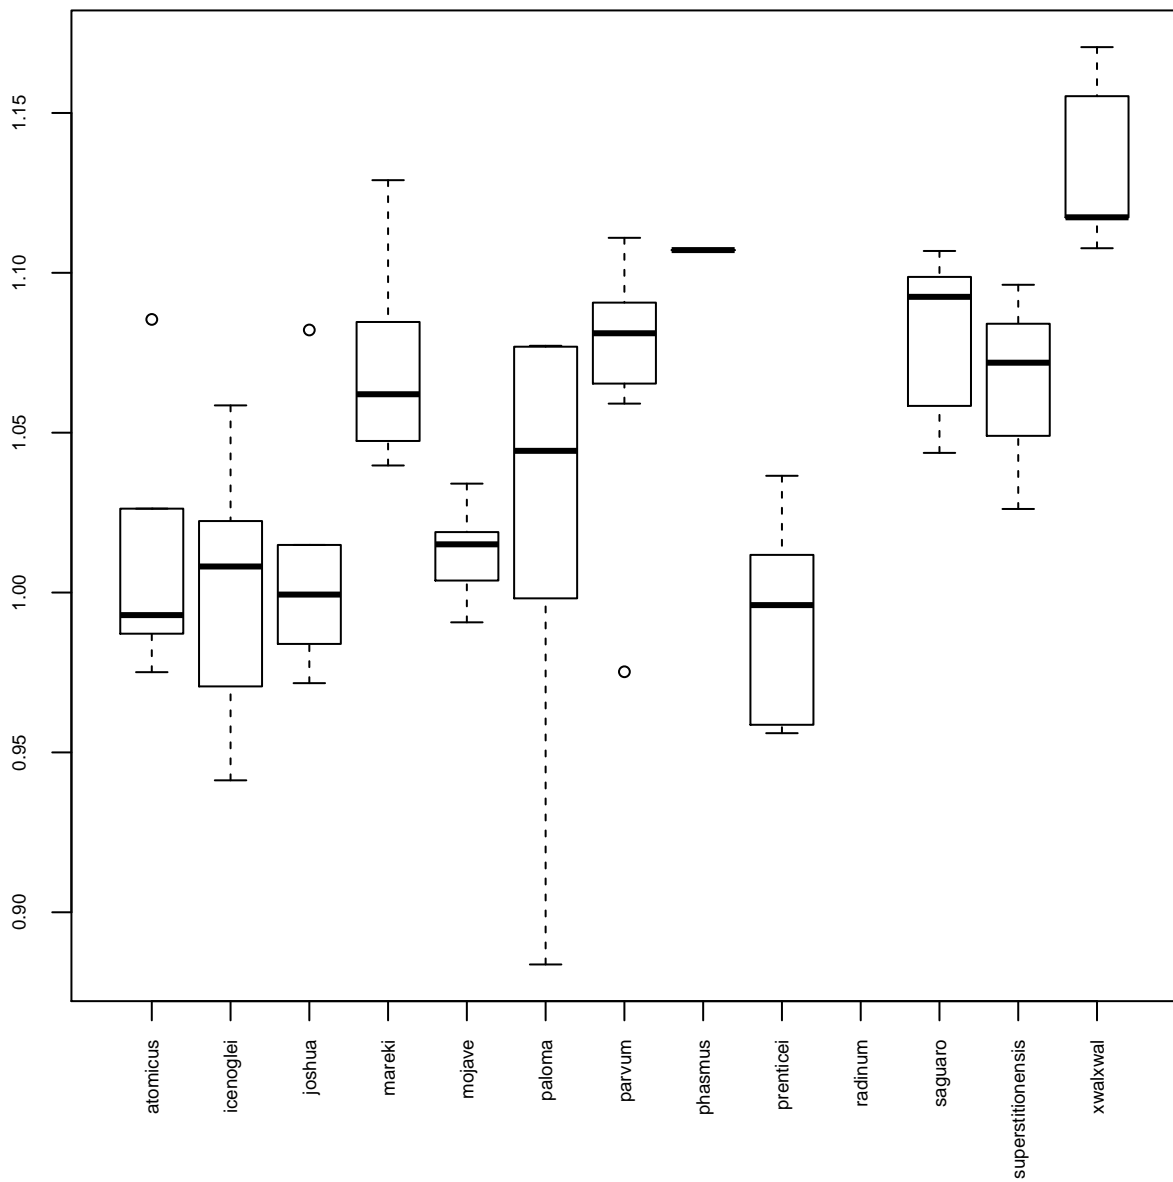

Supplement: Supplementary file 1296

## Patella 4/Metatarsus 4 ratio – females

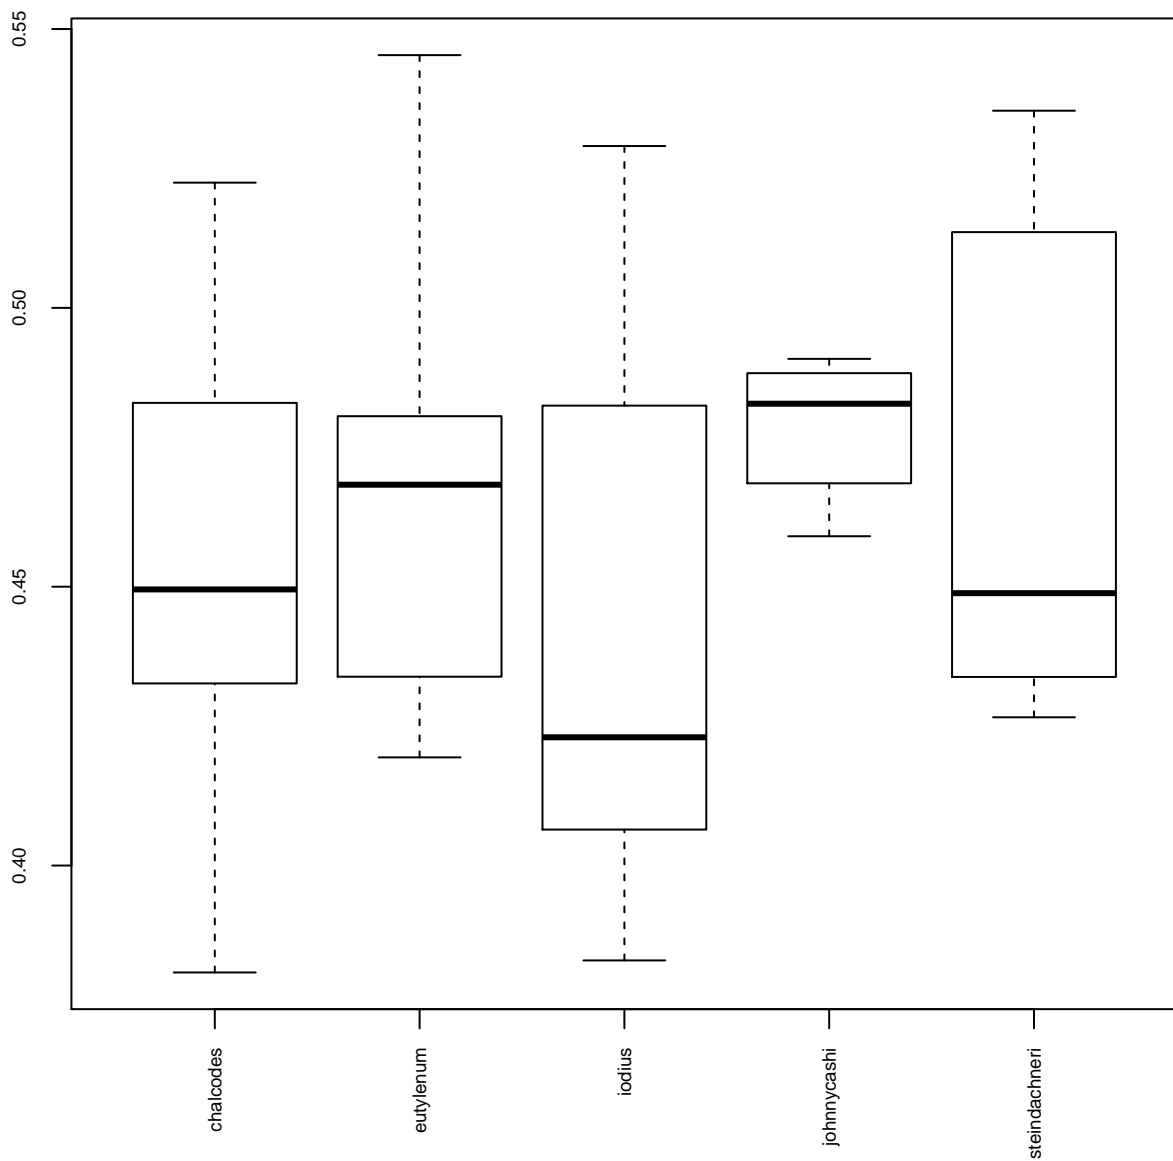

Supplement: Supplementary file 1297

# Metatarsus 1/Patella 4 Length ratio – females

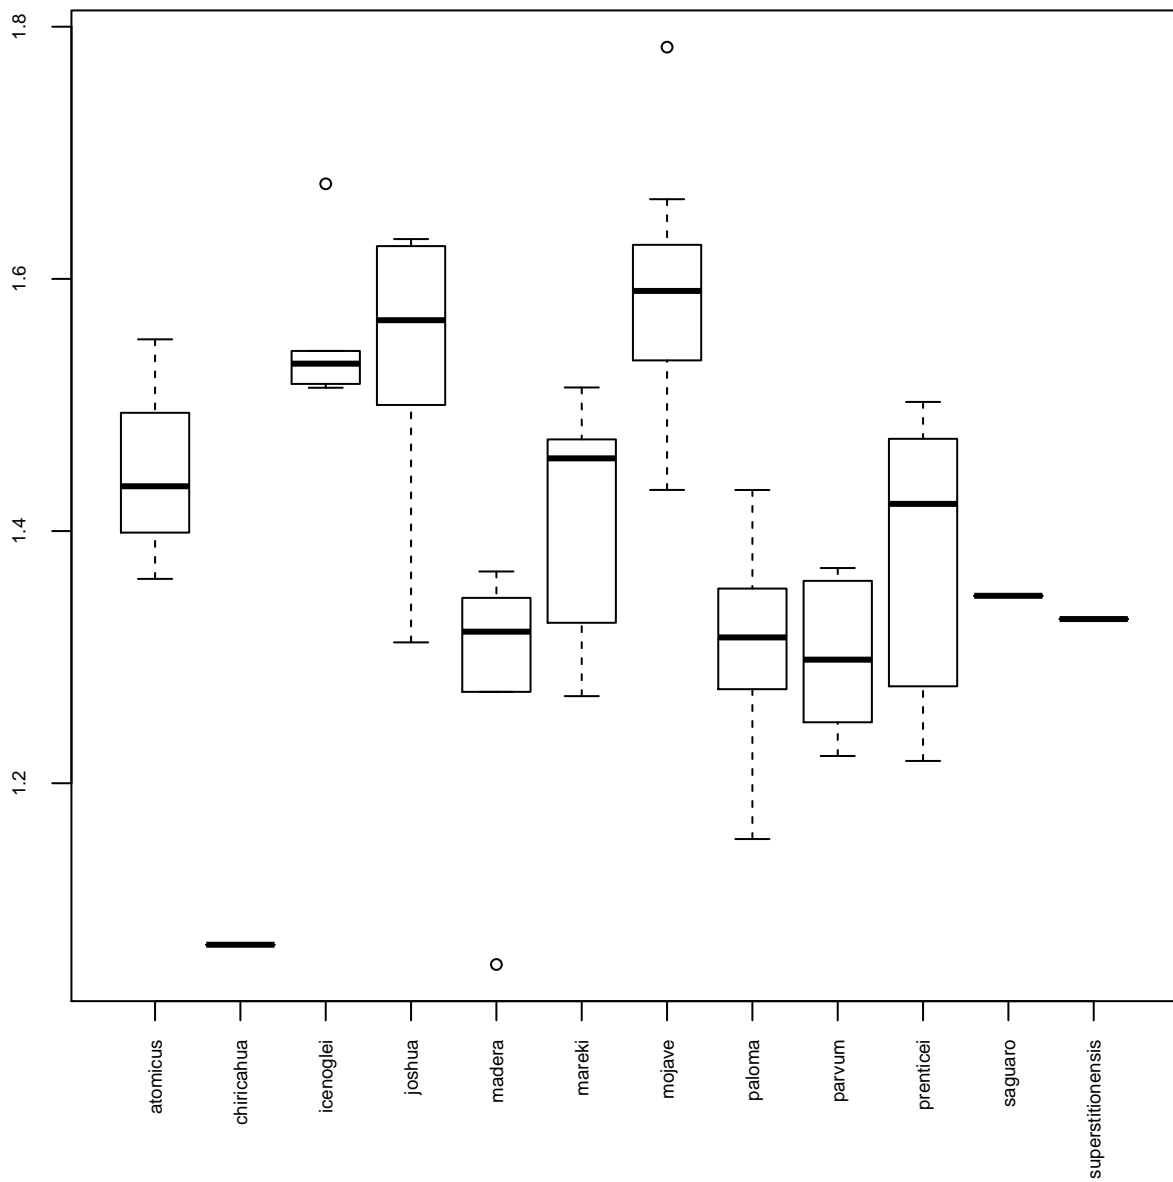

Supplement: Supplementary file 1298

## Leg 4 Scopulation ratio – females

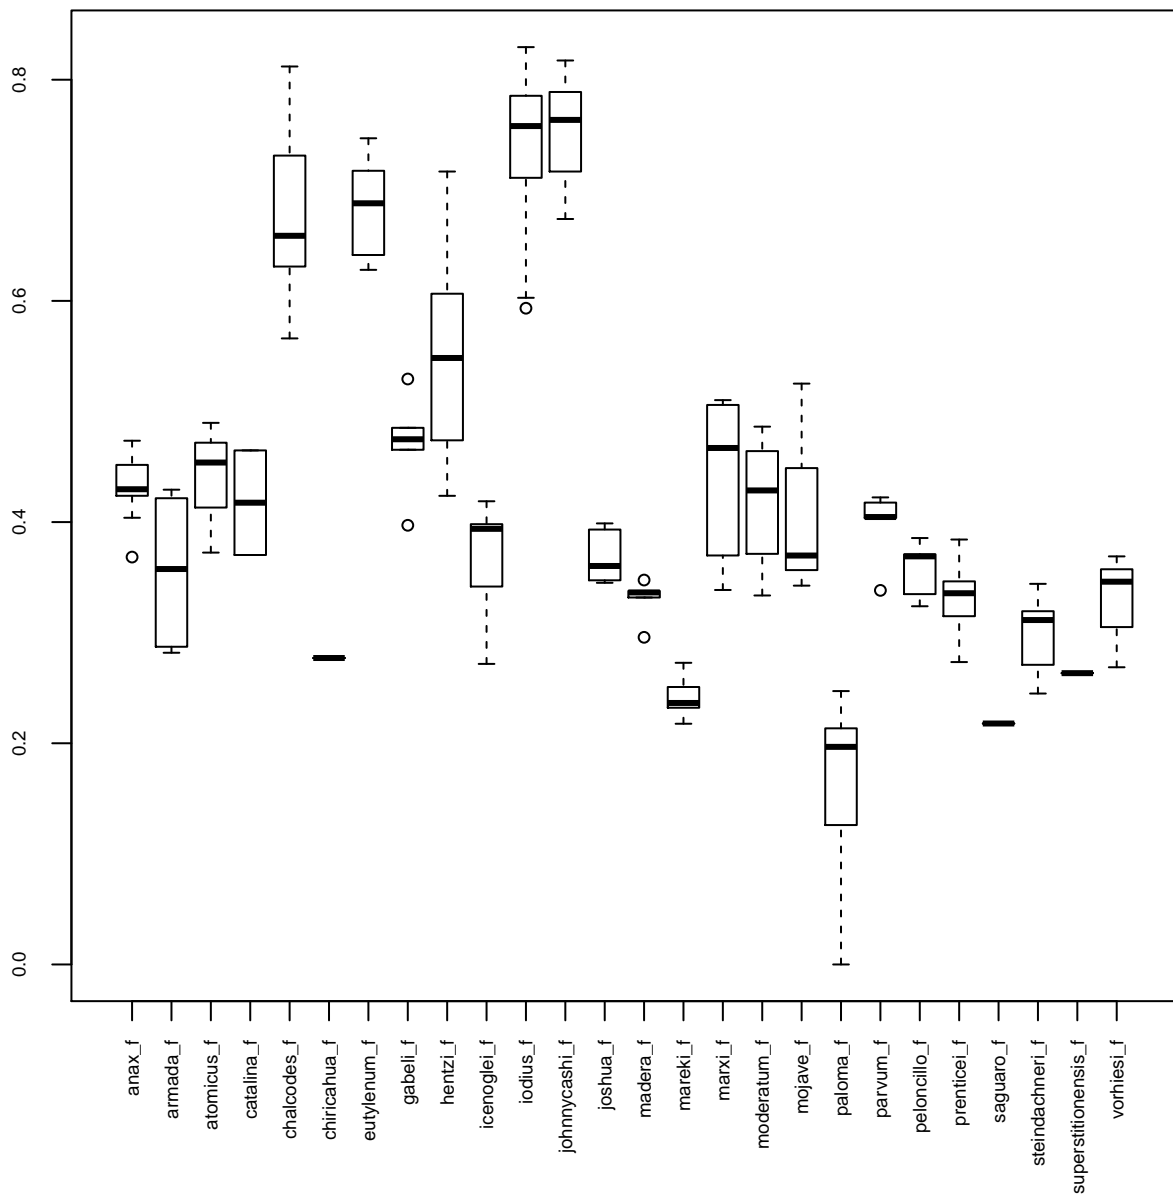

Supplement: Supplementary file 1299

# Tarsus 1/Patella 4 Length ratio – males

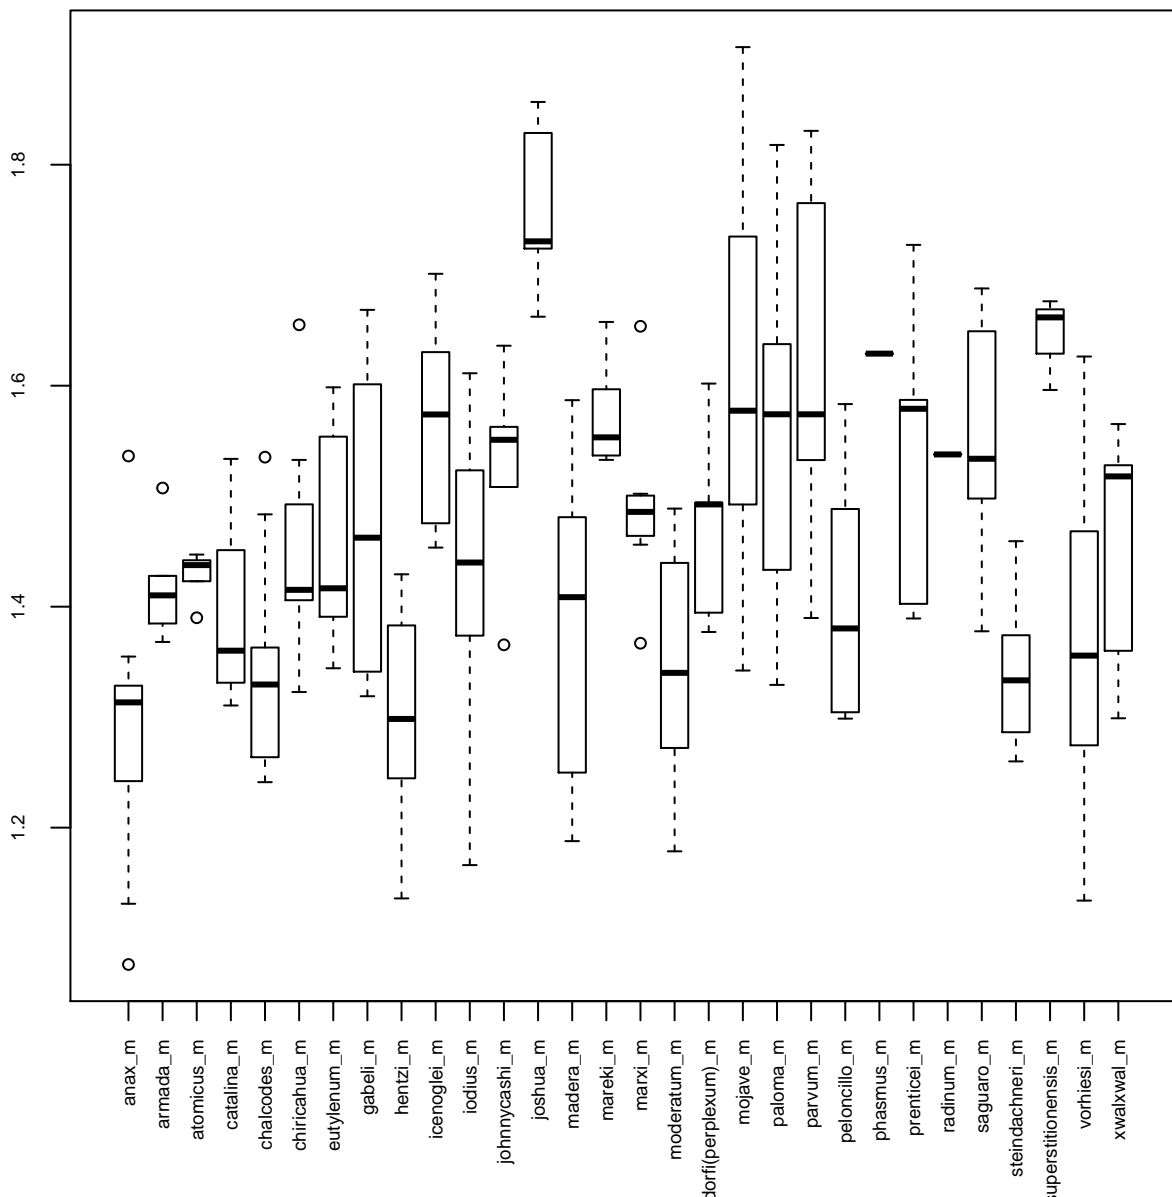

Supplement: Supplementary file 1300
