# Supplementary material (part 14 of 15)
Source: publisher site journal article supplement (http://zookeys.pensoft.net/article/6264/download/suppl/32/)

# Tarsus 1/Tibia 4 Length ratio – females

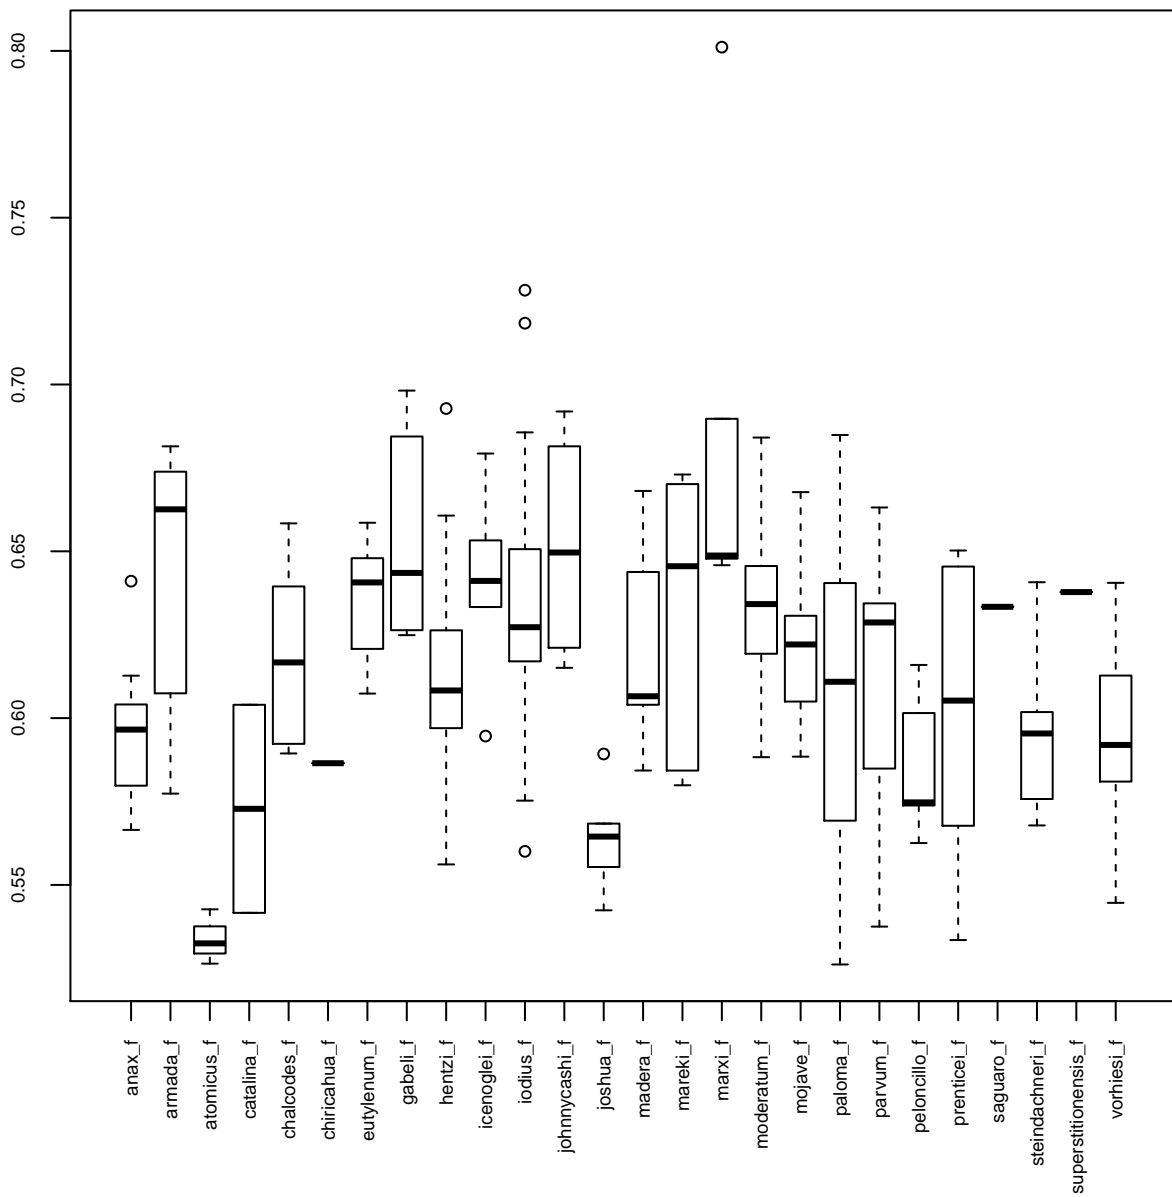

Supplement: Supplementary file 1301

## Patella 1/Patella 4 ratio – females

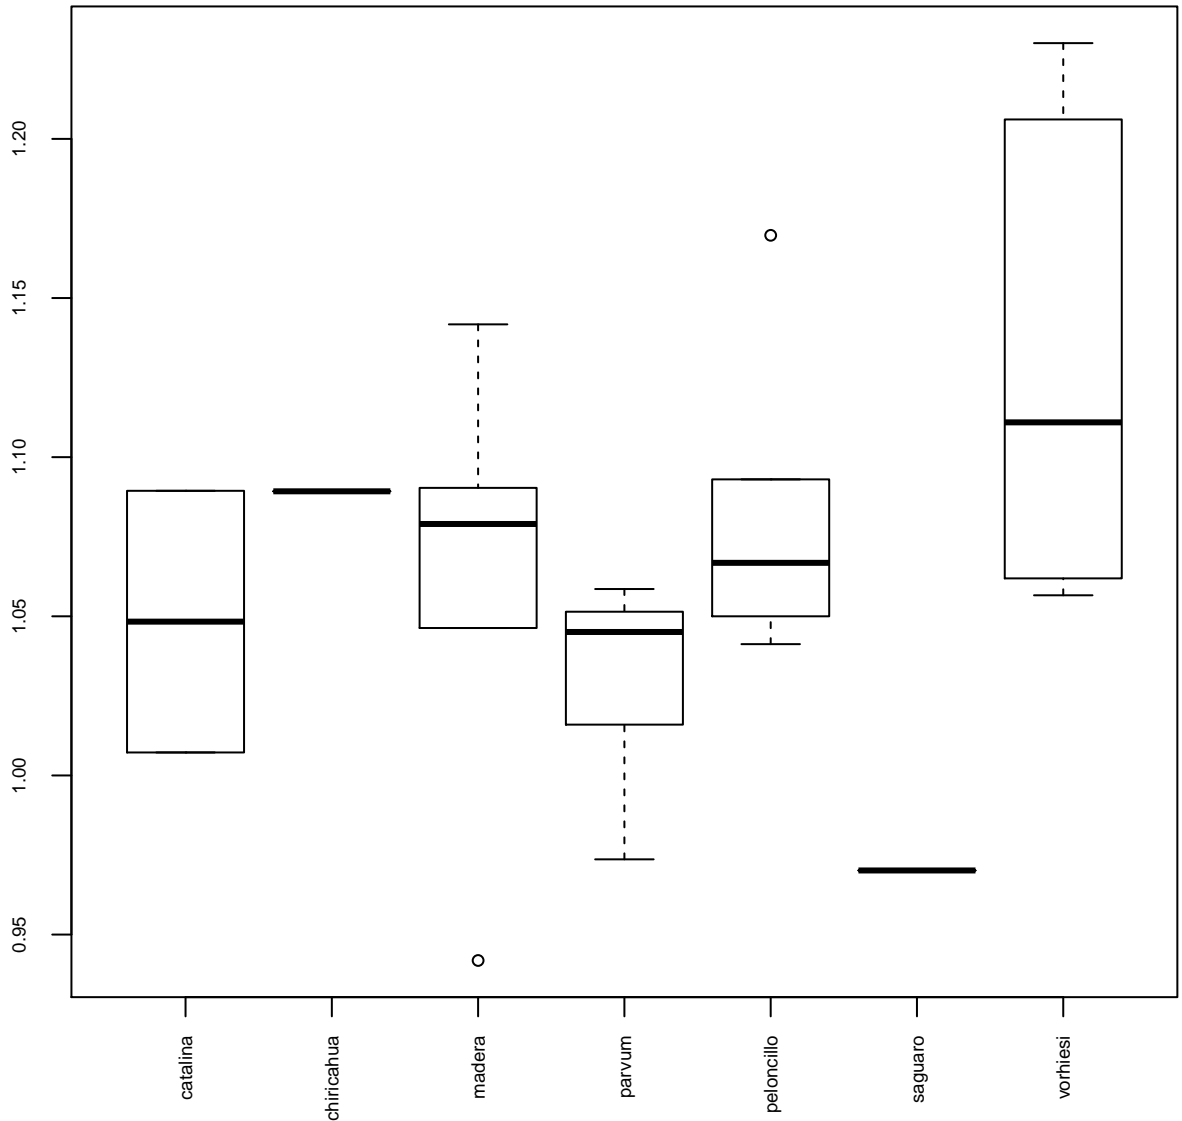

Supplement: Supplementary file 1302

## Carapace Length/Femur 3 ratio – males

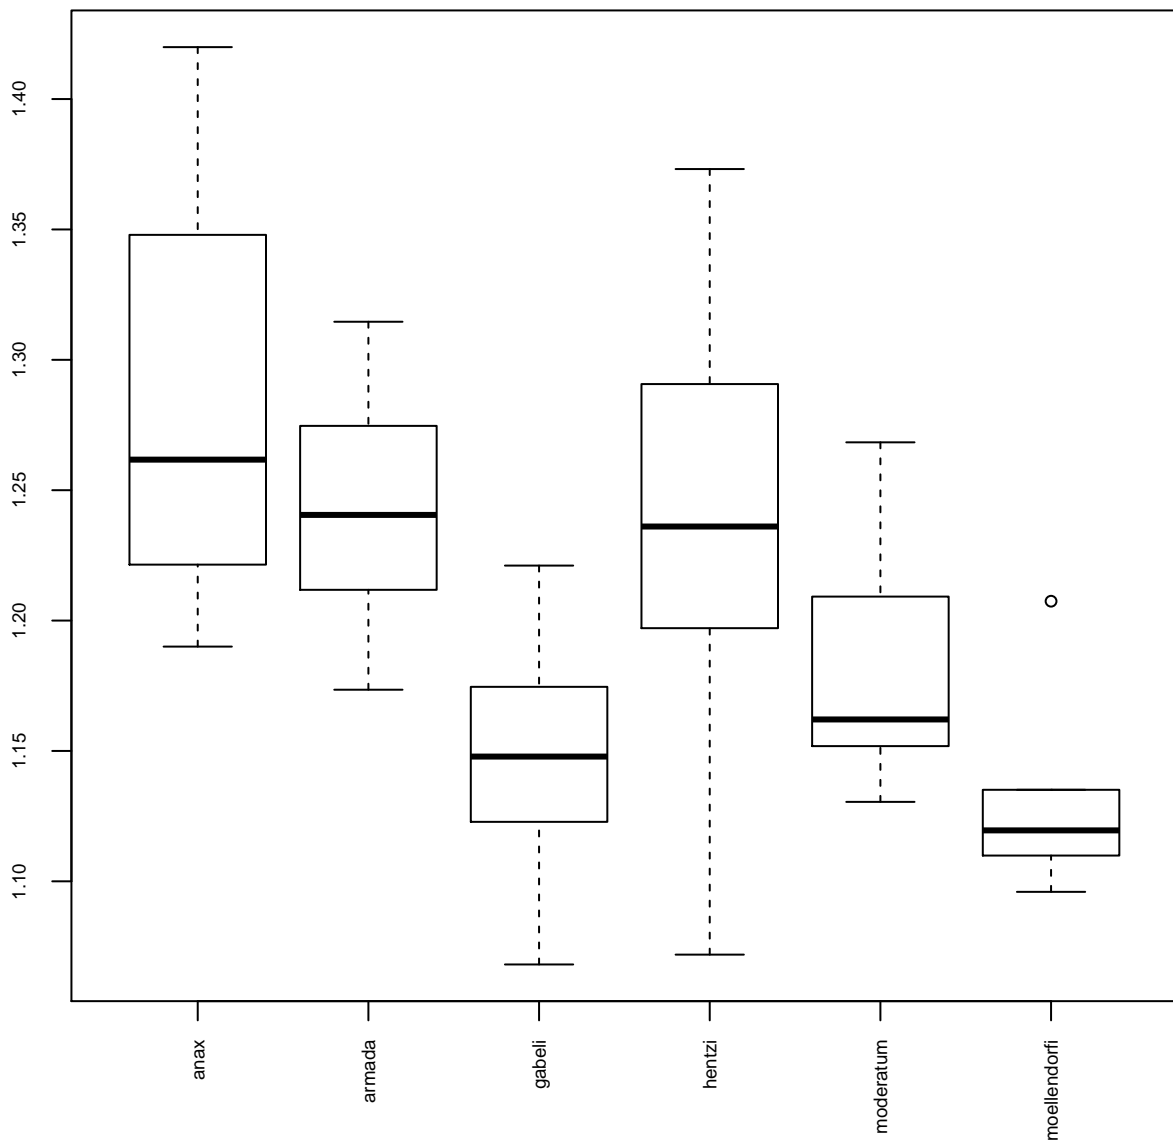

Supplement: Supplementary file 1303

## Palpal Tibia/Tibia 4 Length ratio – males

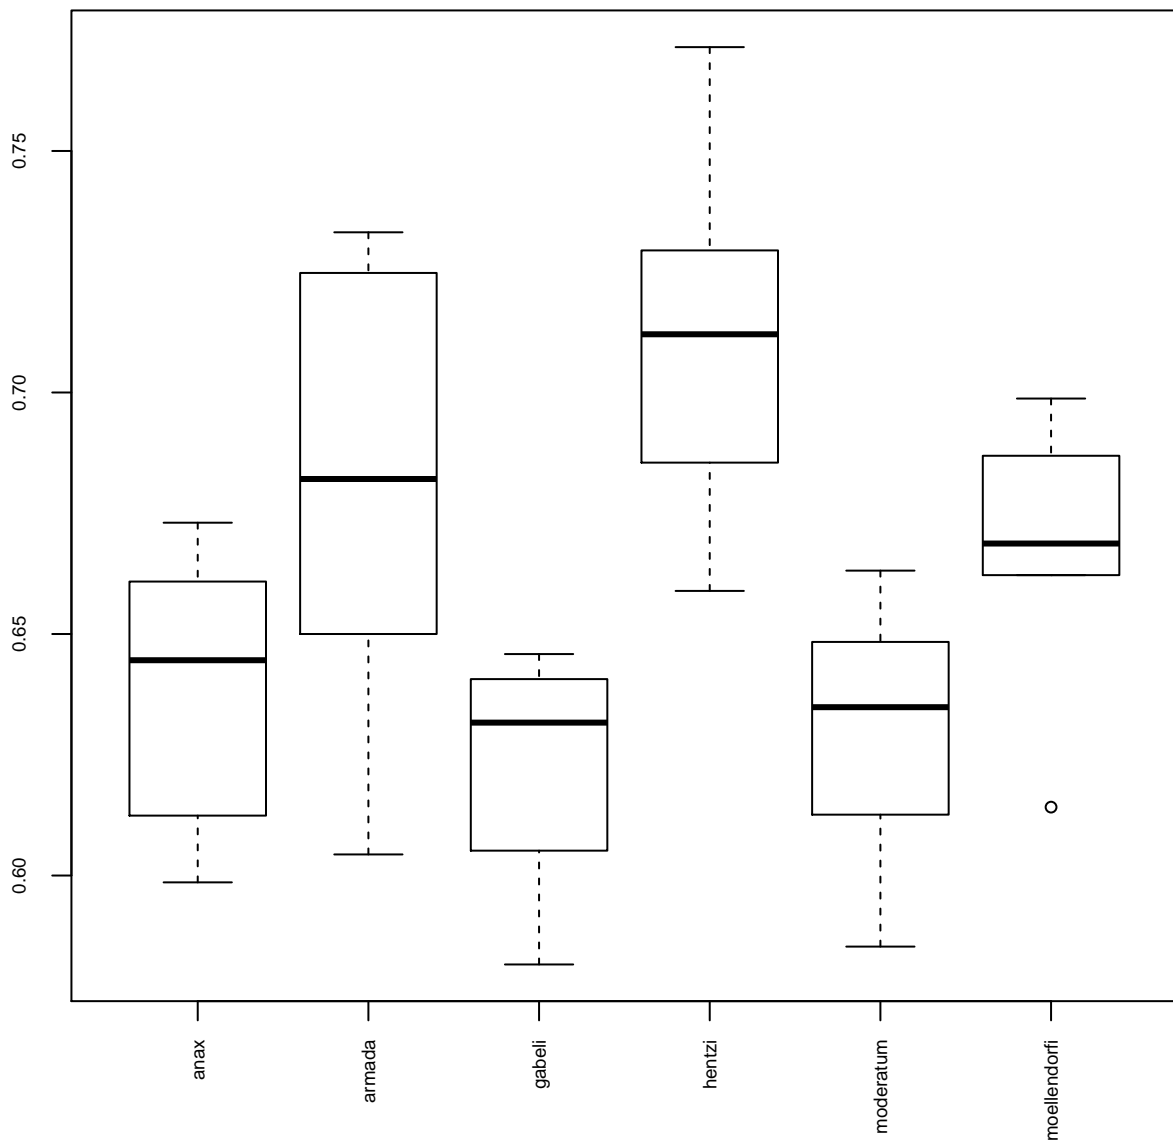

Supplement: Supplementary file 1304

## Patella 3/Tarsus 4 Length ratio – males

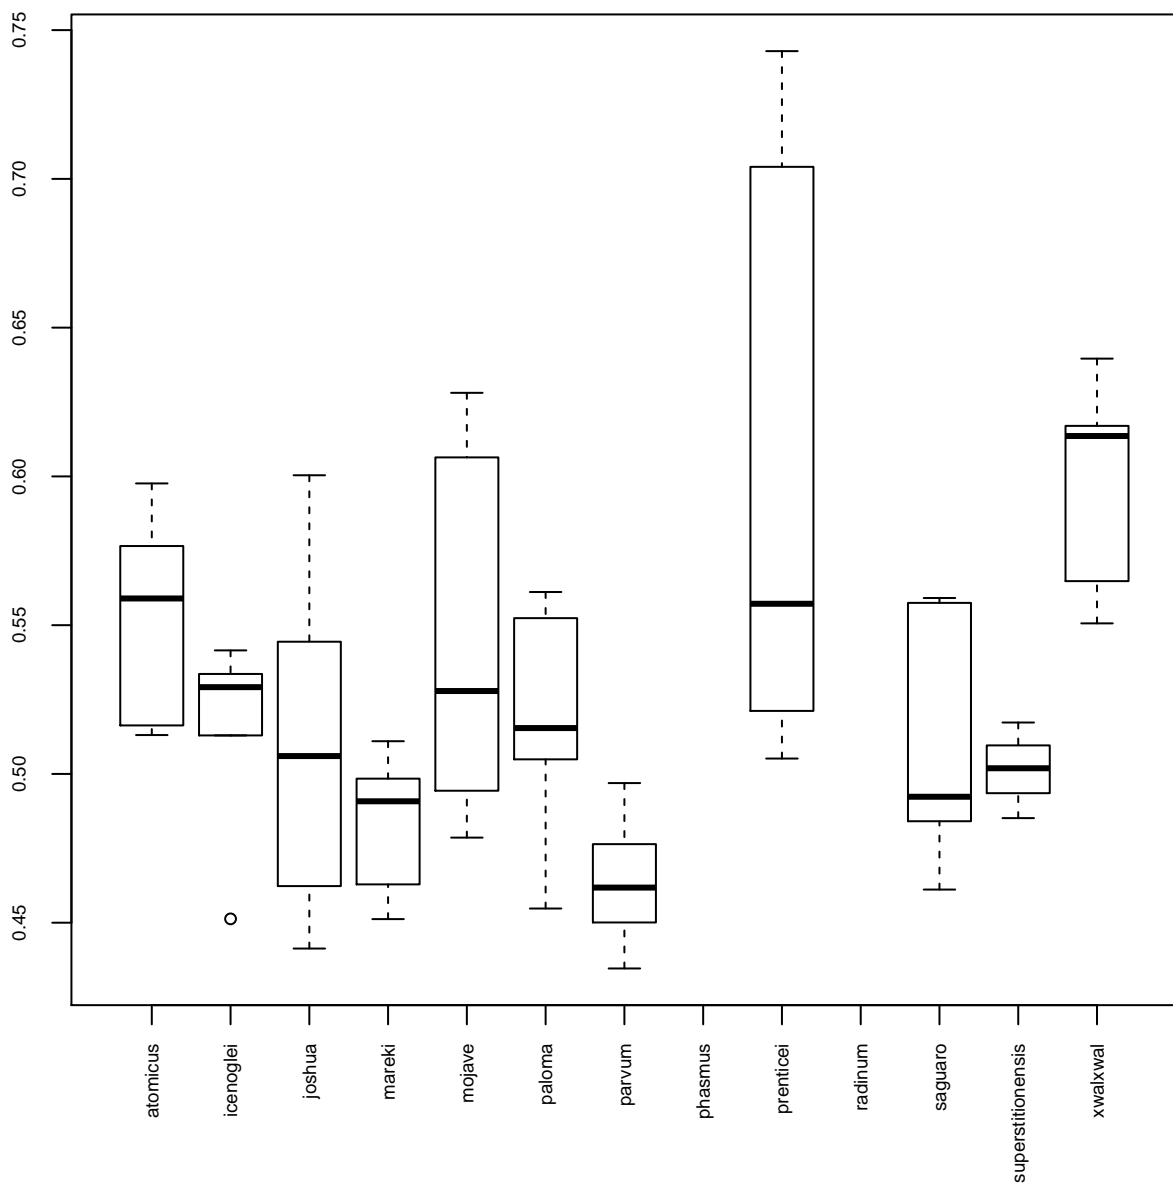

Supplement: Supplementary file 1305

## Carapace Length/Femur 1 ratio – females

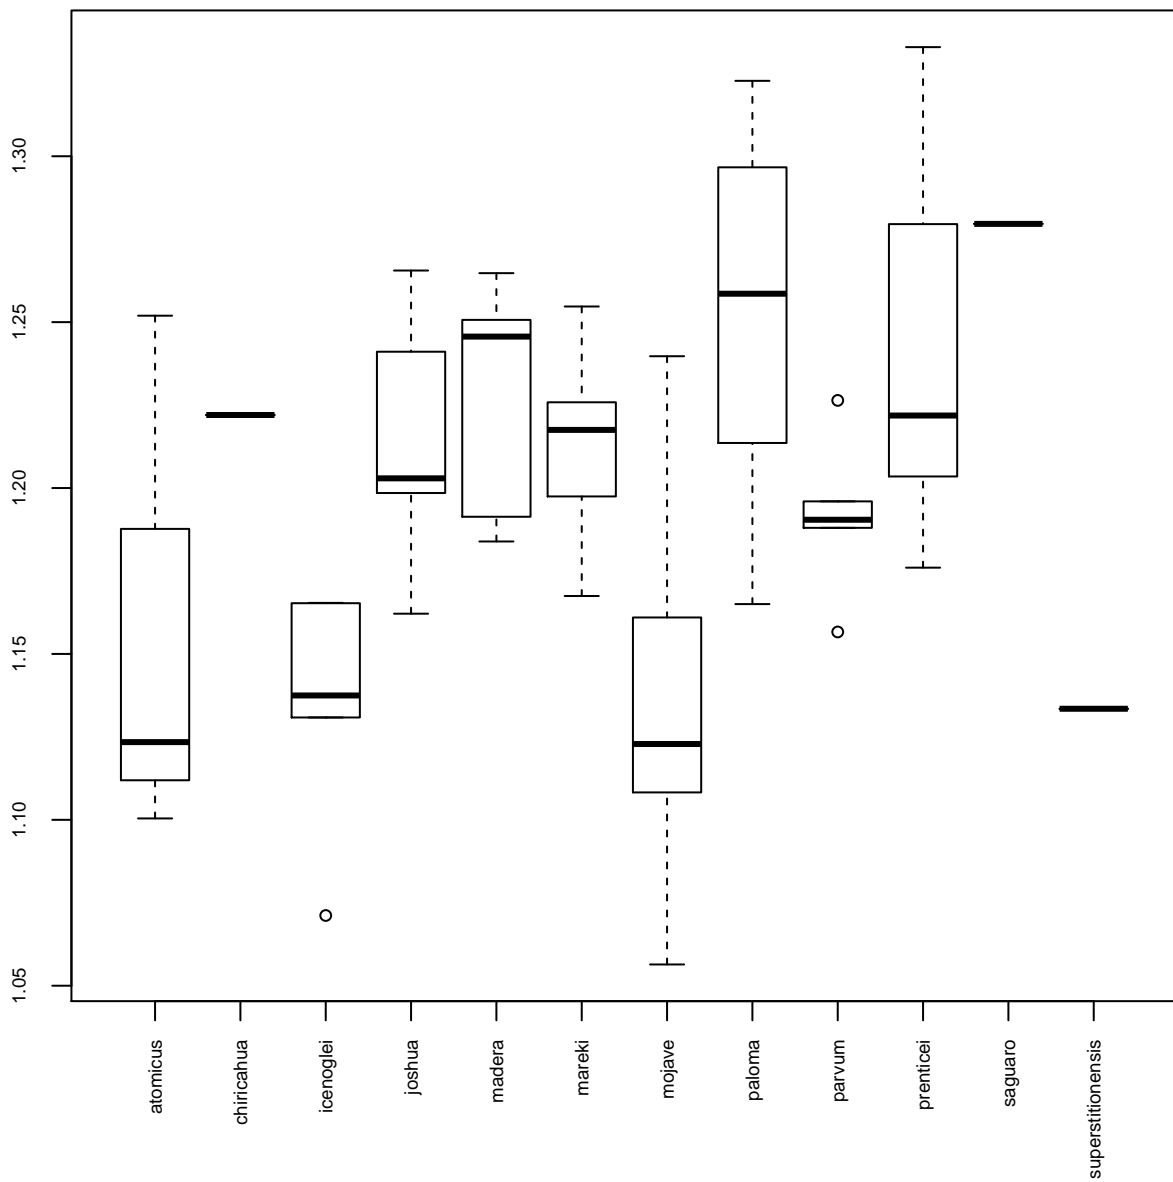

Supplement: Supplementary file 1306

## Tibia 1/Tibia 3 ratio – males

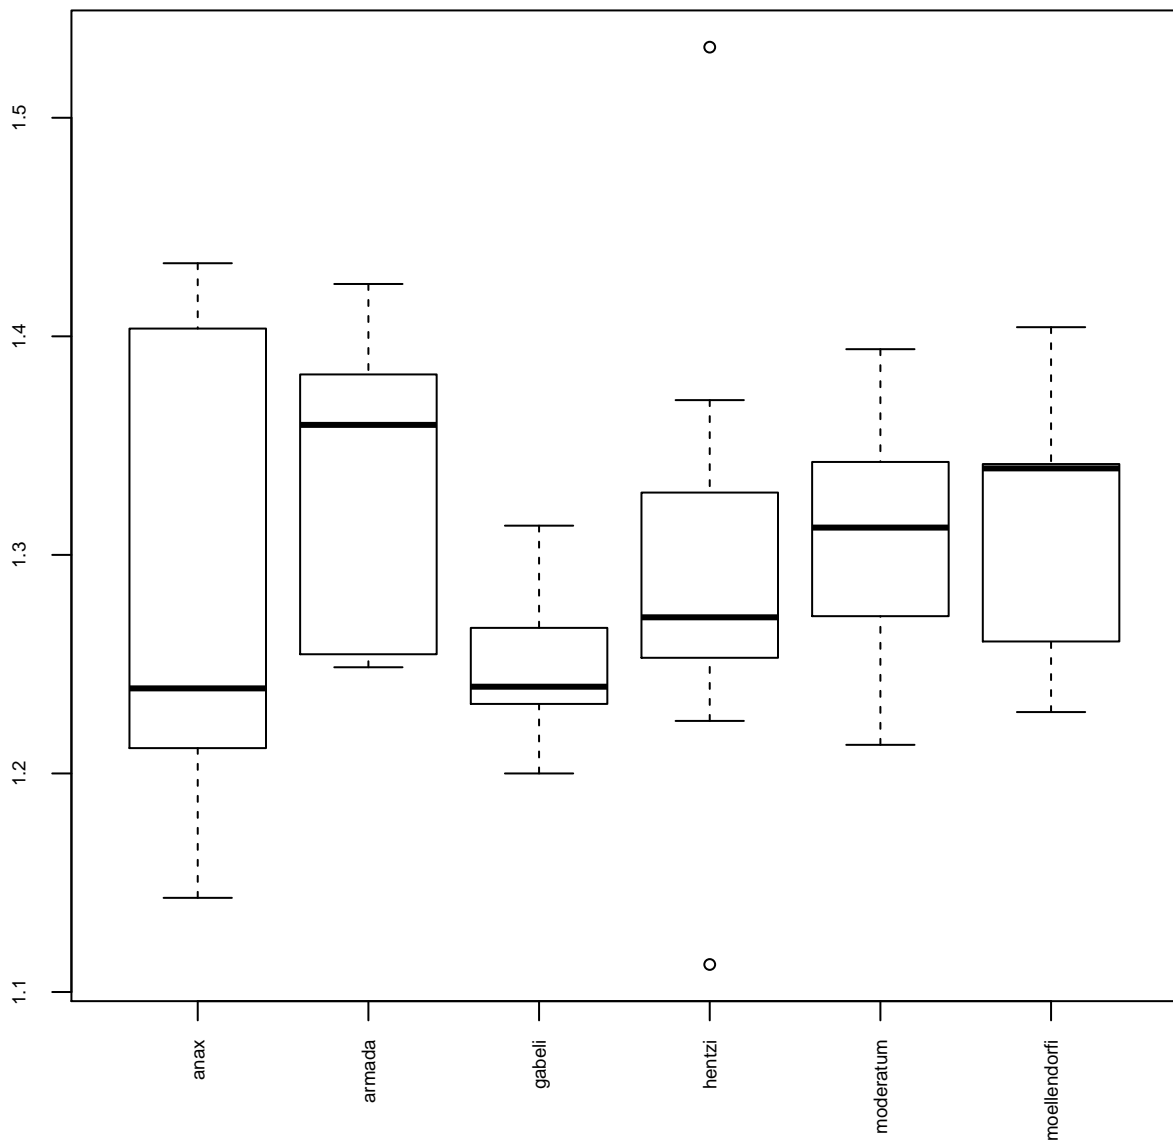

Supplement: Supplementary file 1307

## Femur 1/Tarsus 3 ratio – females

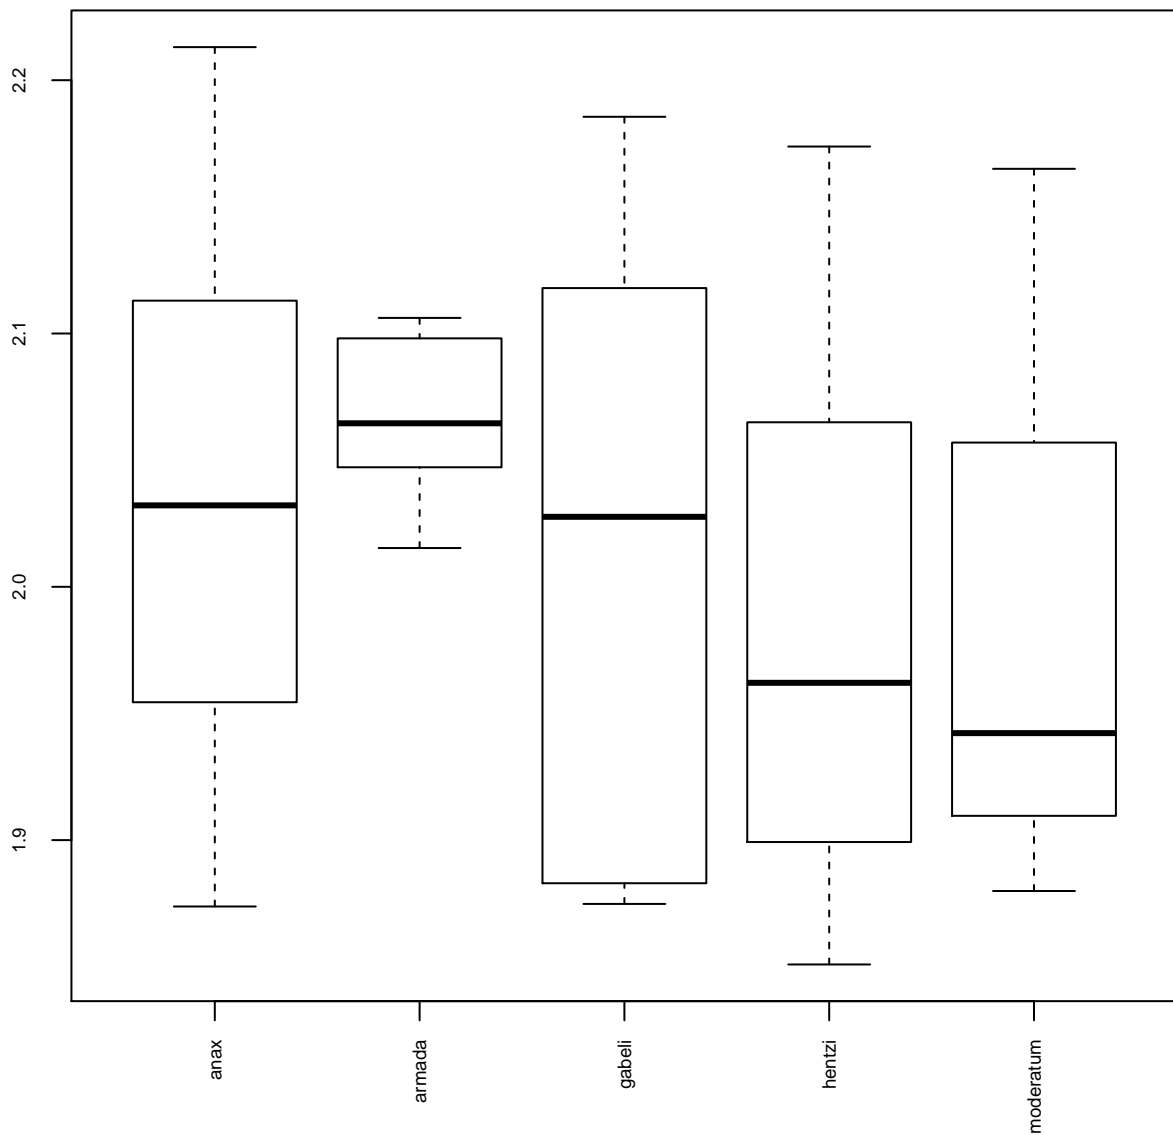

Supplement: Supplementary file 1308

## Carapace Length/Metatarsus 1 ratio – males

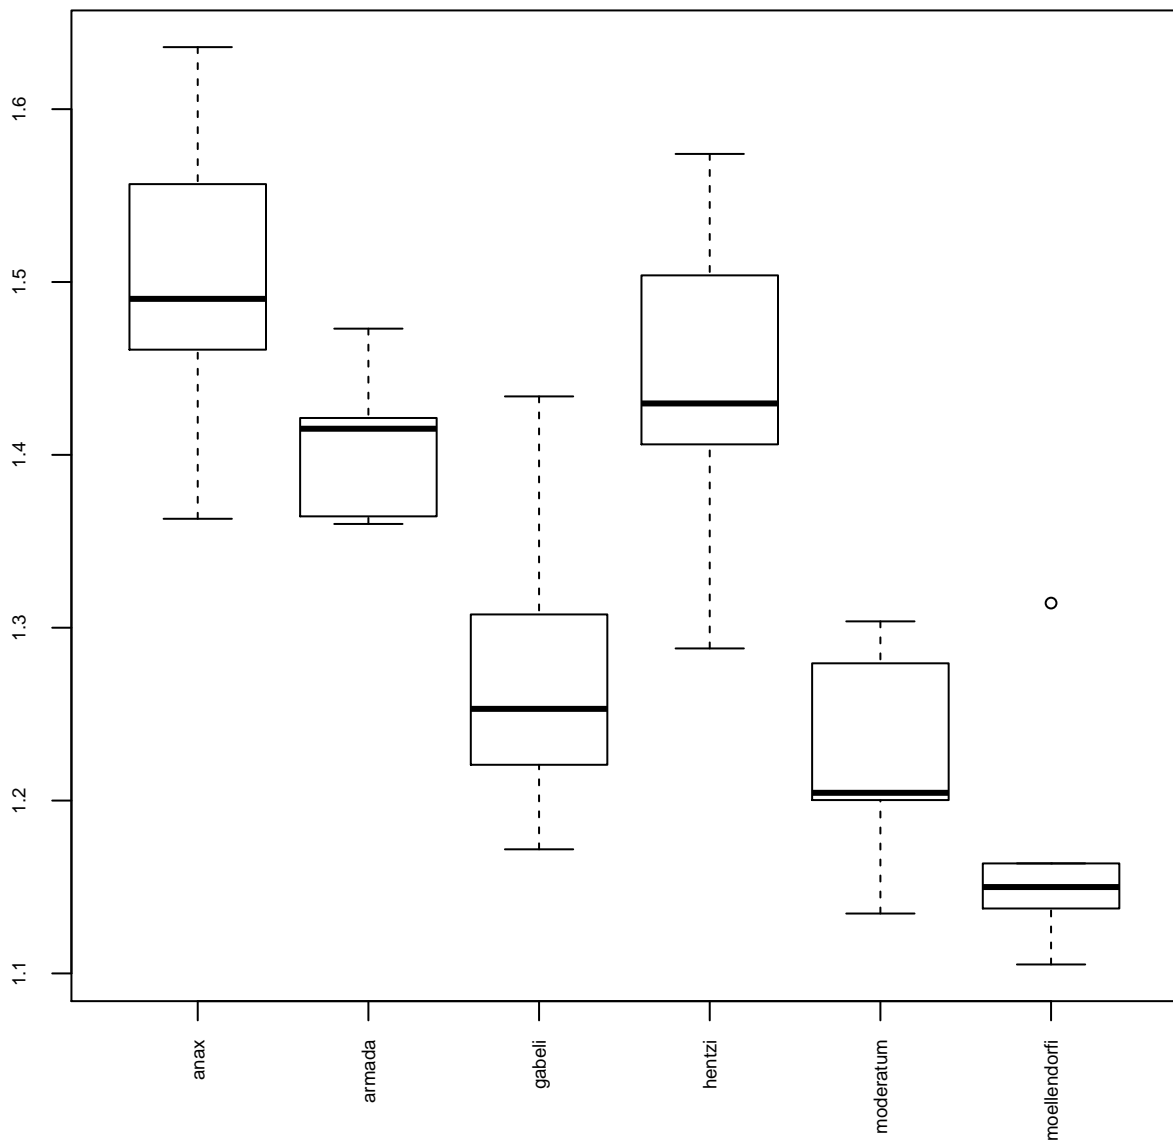

Supplement: Supplementary file 1309

## Tarsus 3/Tibia 4 Length ratio – males

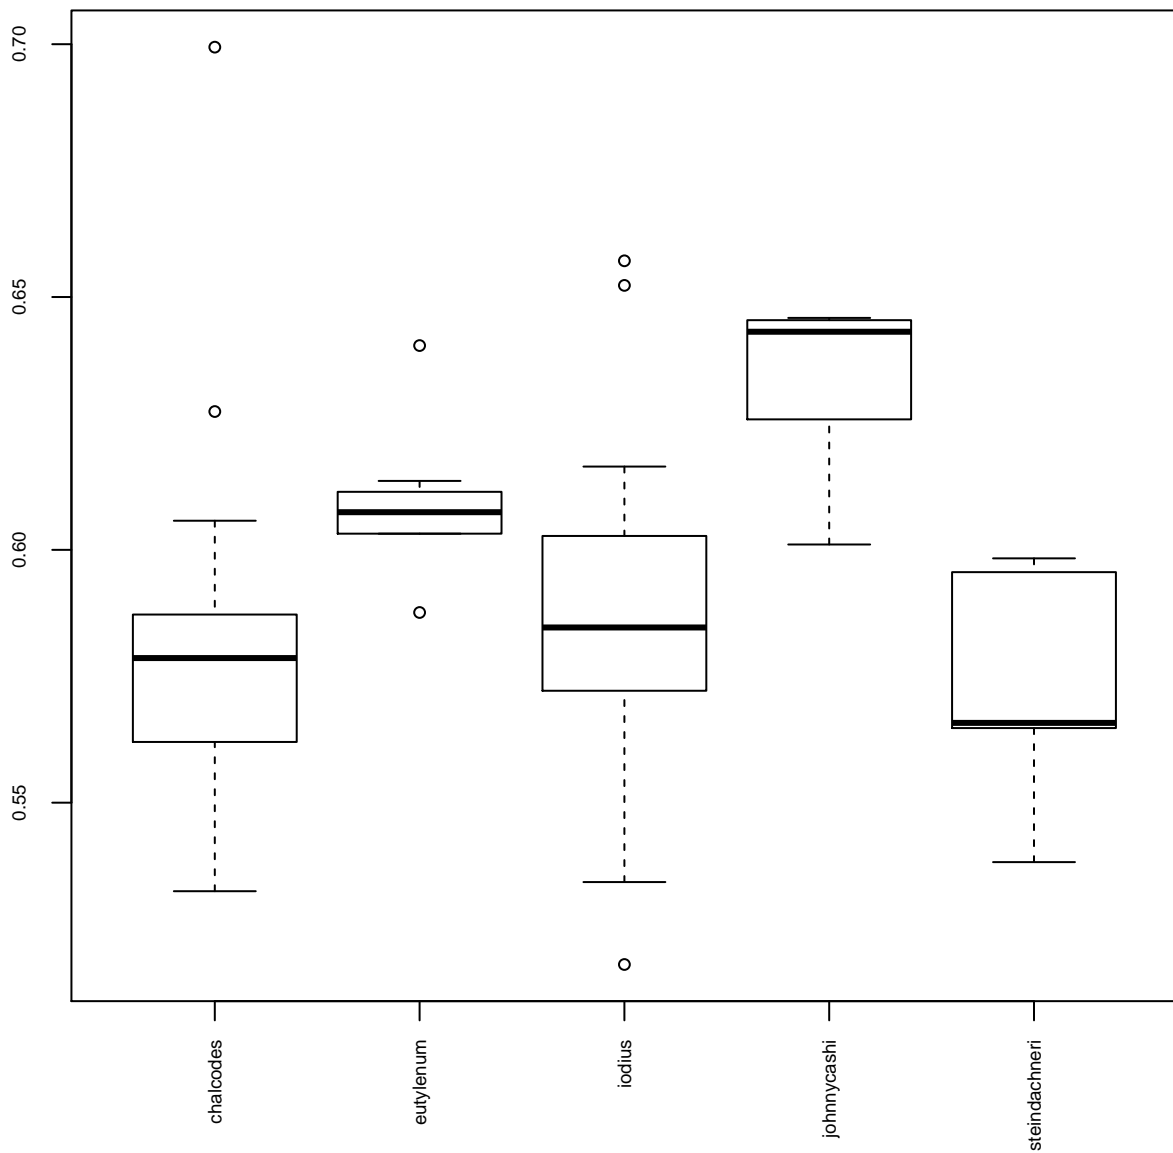

Supplement: Supplementary file 1310

## Tarsus 1/Patella 4 Length ratio – males

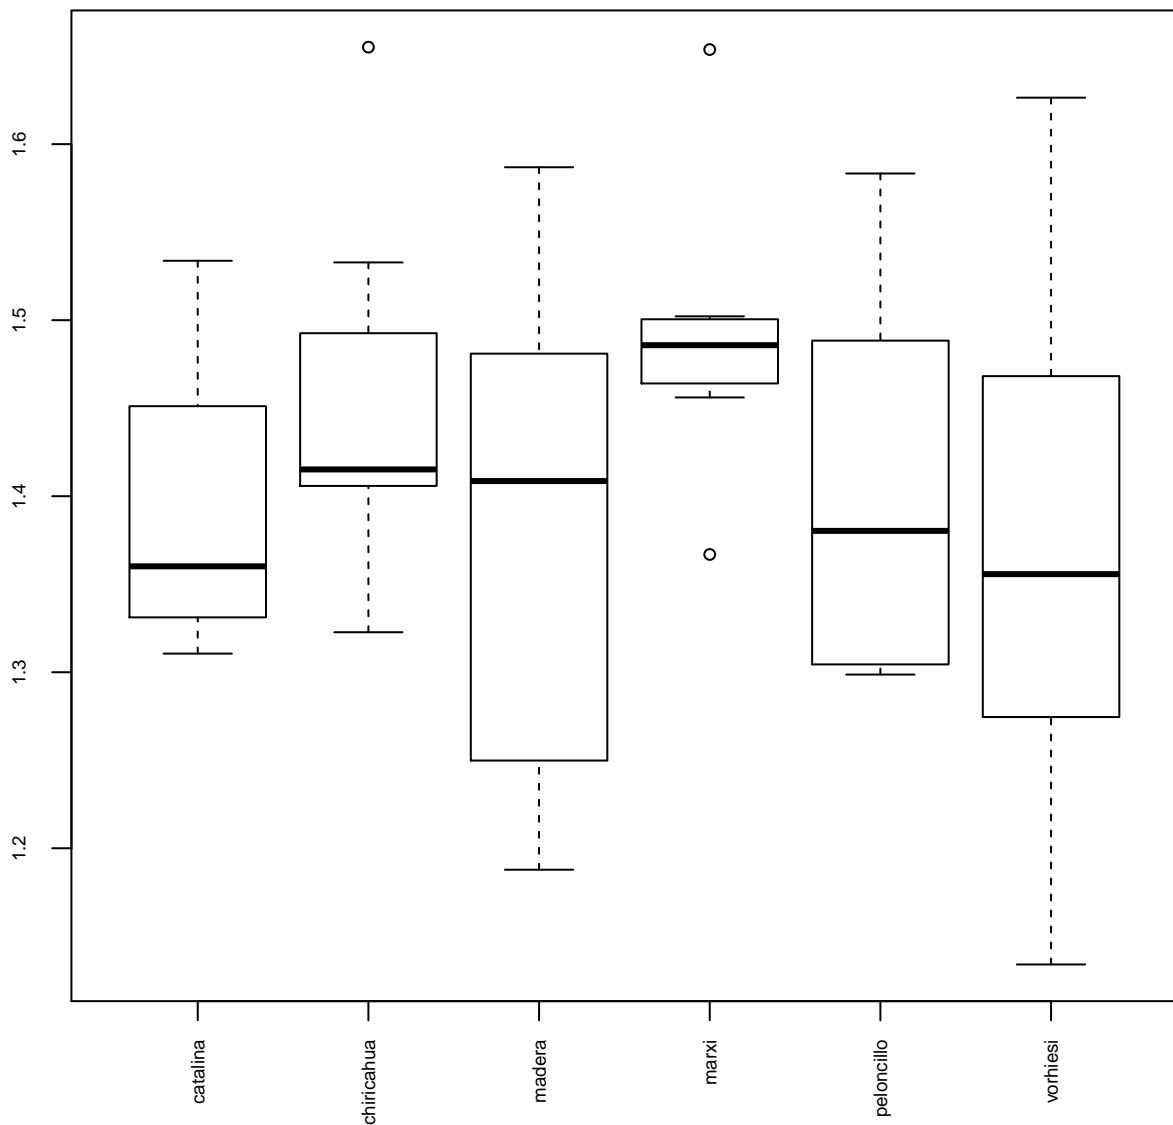

Supplement: Supplementary file 1311

## Femur 1 Length/Width ratio – males

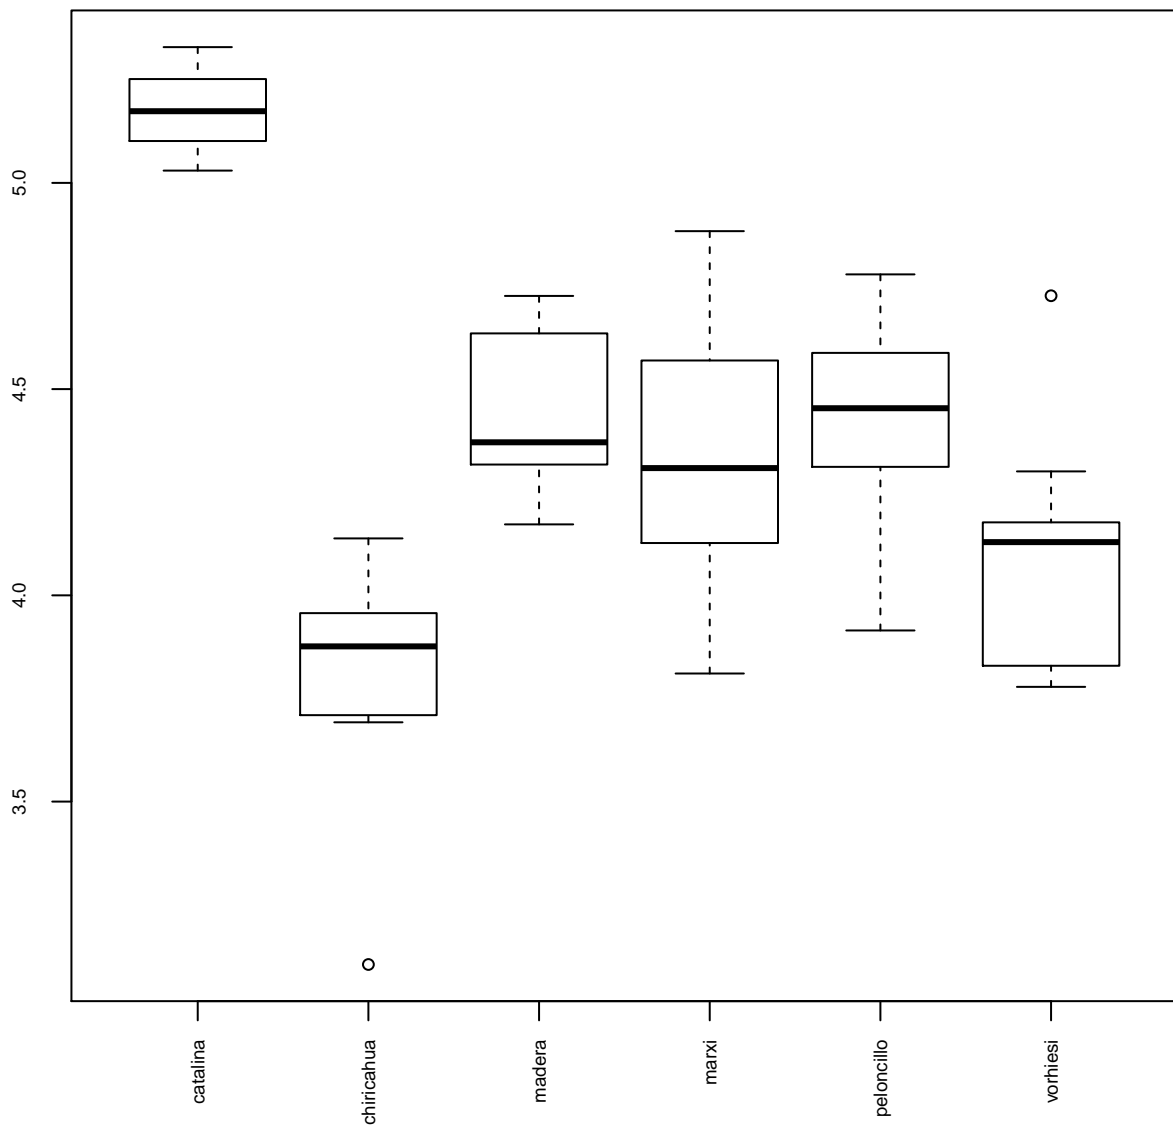

Supplement: Supplementary file 1312

# Tibia 4/Metatarsus 4 ratio – males

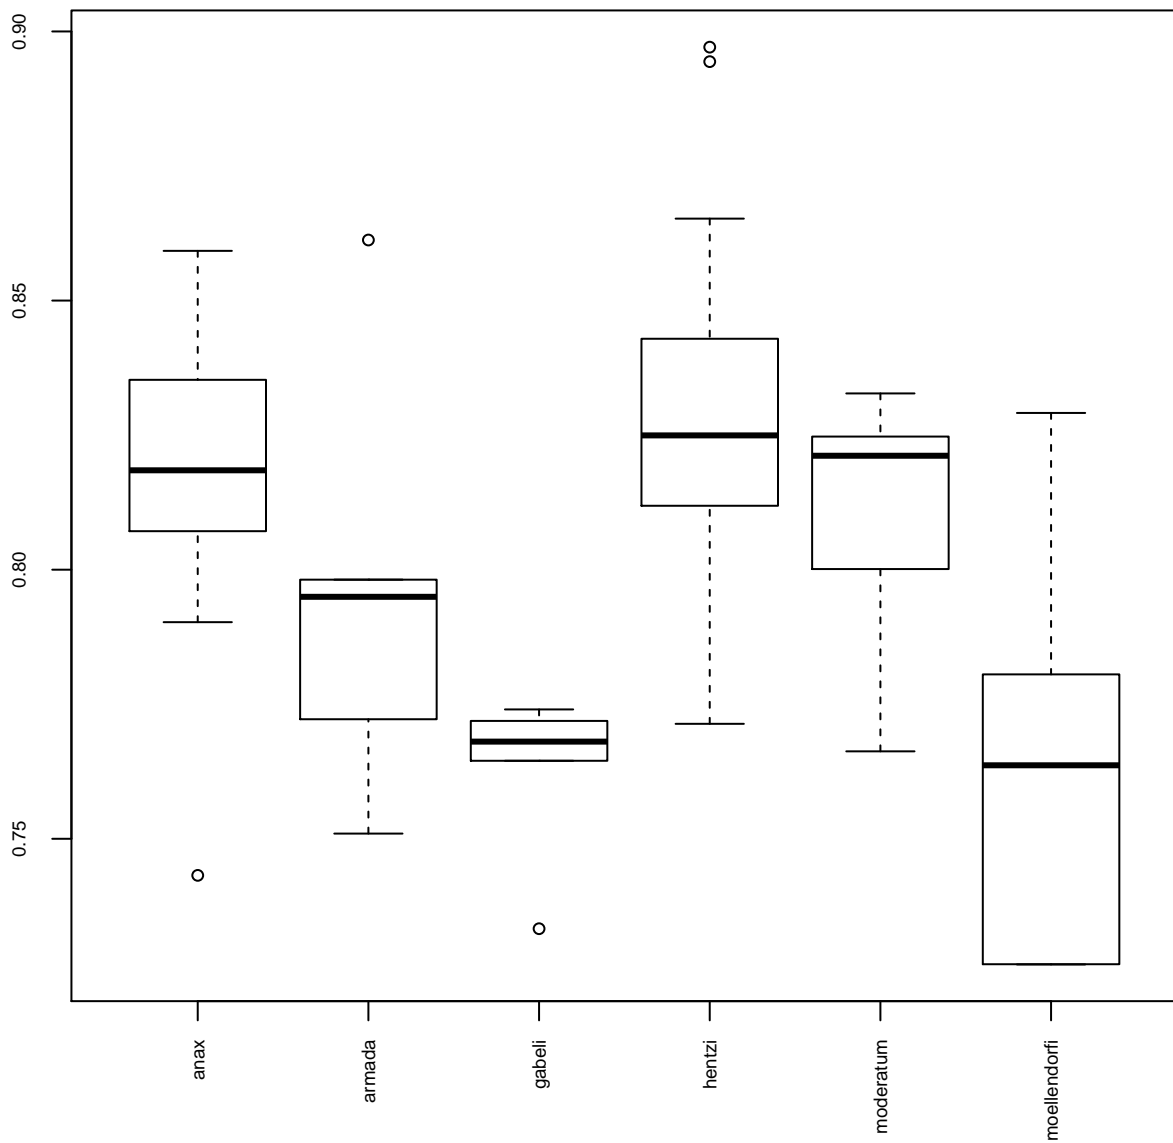

Supplement: Supplementary file 1313

## Palpal Tibia/Tibia 4 Length ratio – males

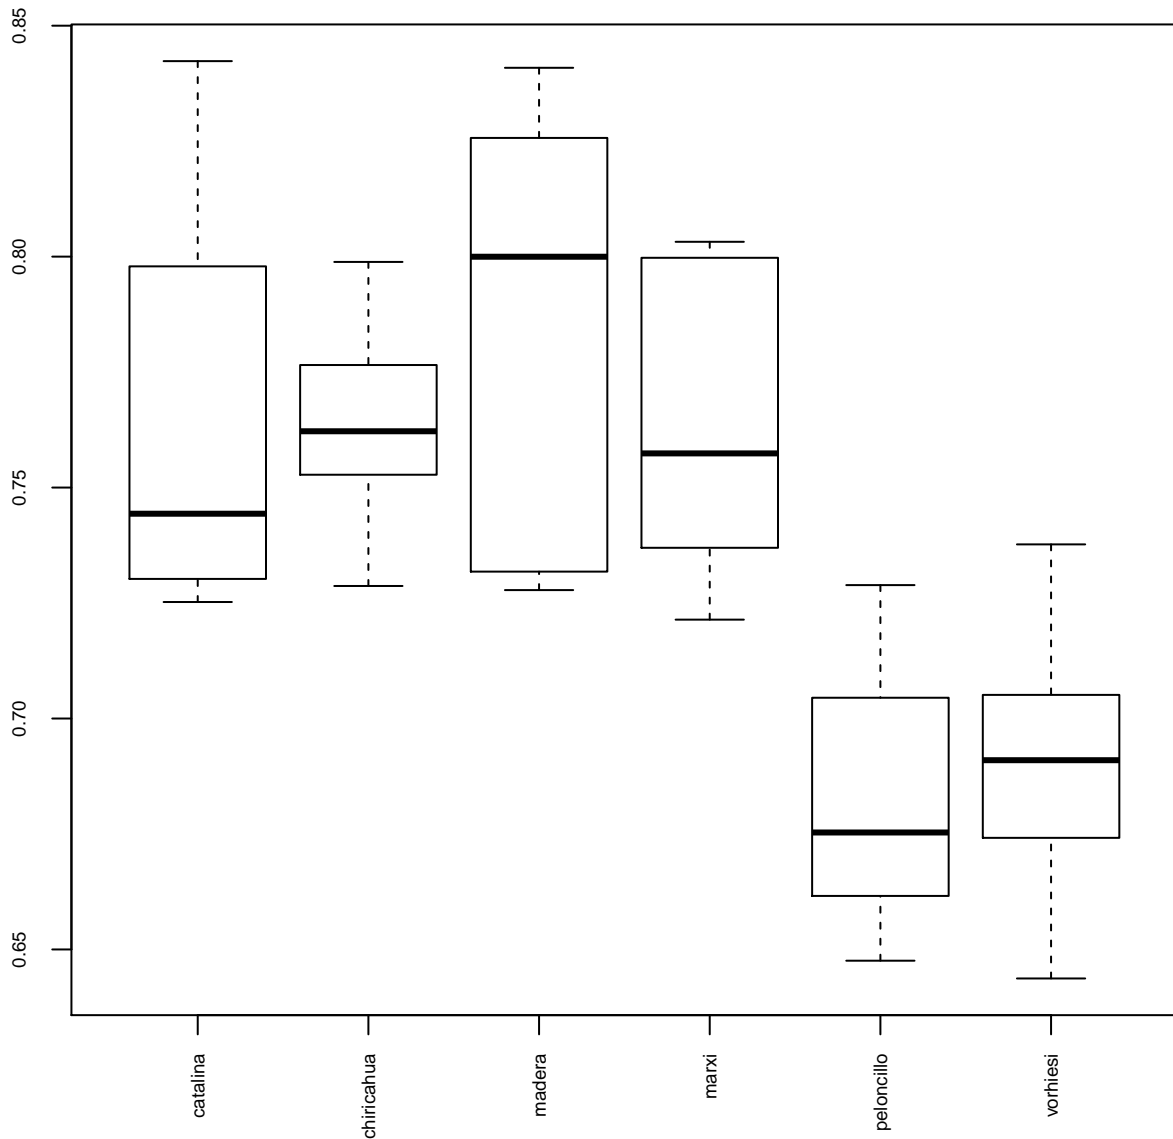

Supplement: Supplementary file 1314

## Metatarsus 1/Tarsus 1 ratio – females

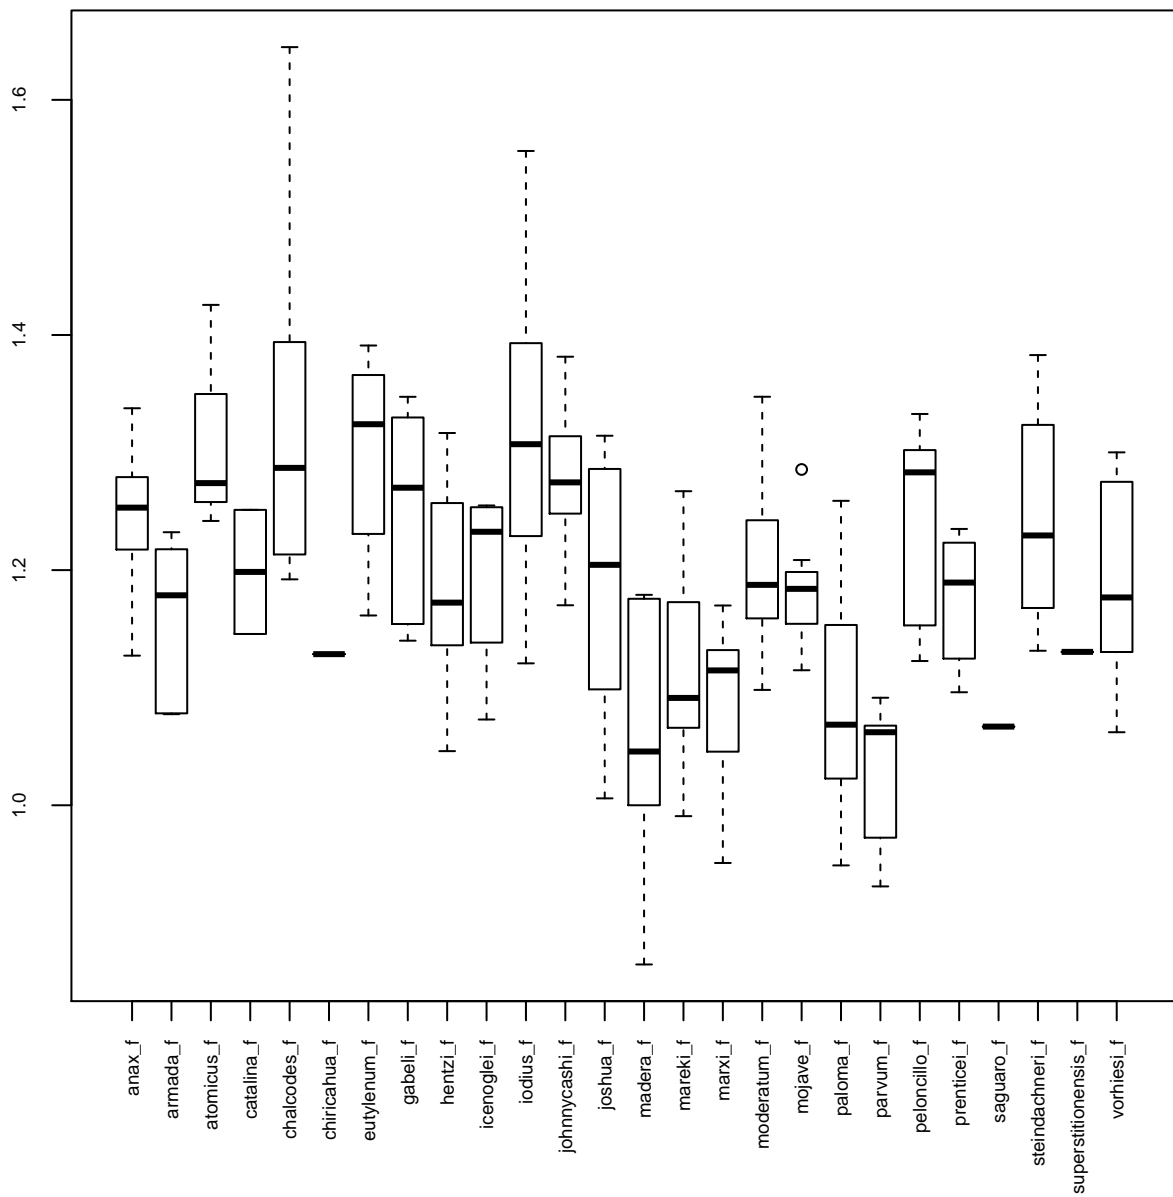

Supplement: Supplementary file 1315

# Metatarsus 1/Metatarsus 3 ratio – females

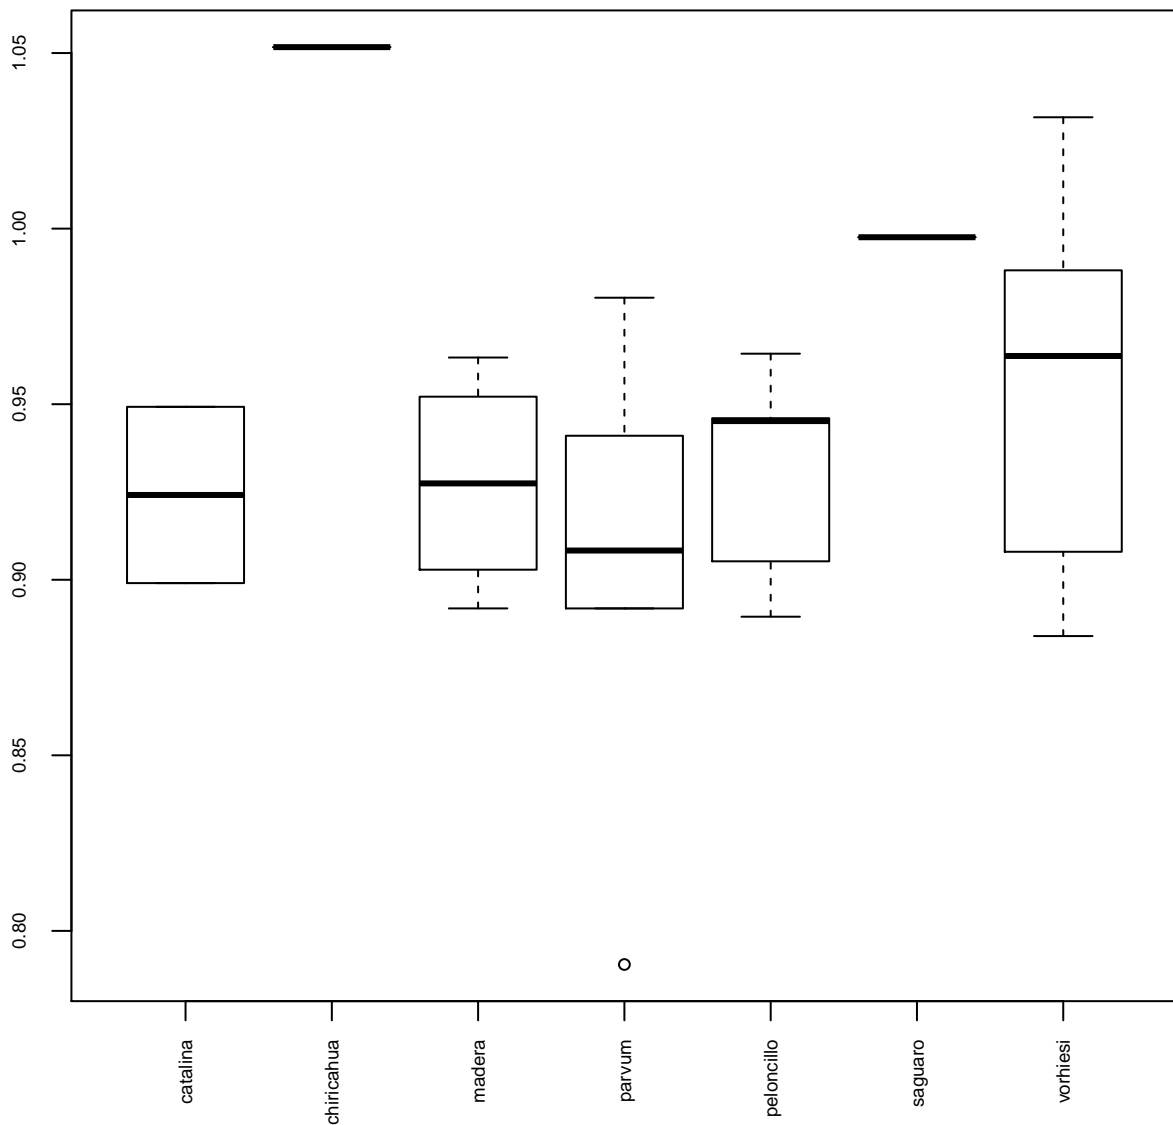

Supplement: Supplementary file 1316

## Tibia 1/Femur 4 Length ratio – females

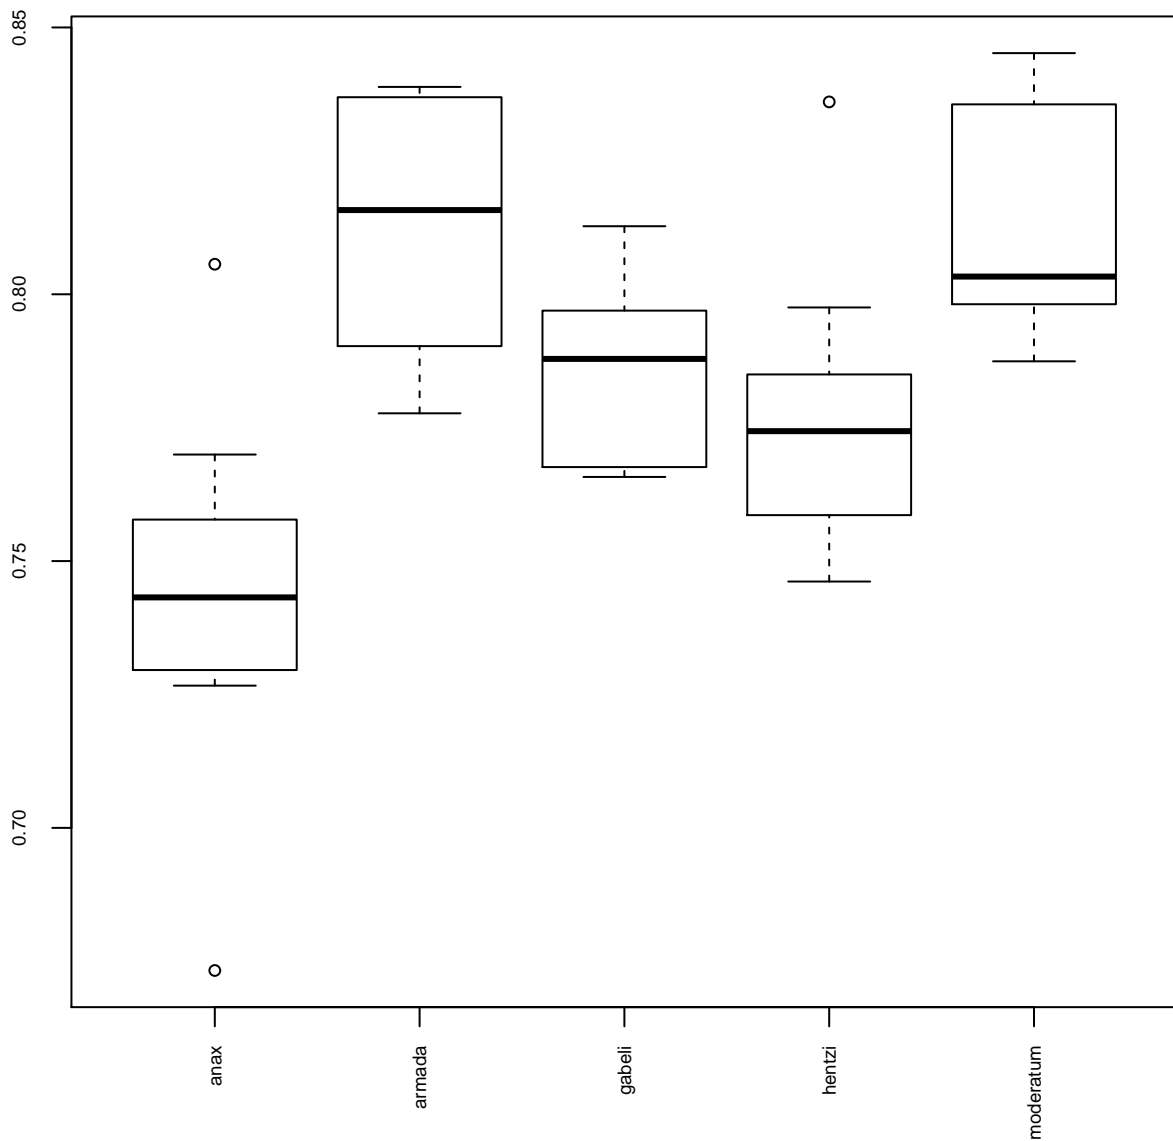

Supplement: Supplementary file 1317

# Patella 3/Tarsus 4 Length ratio – females

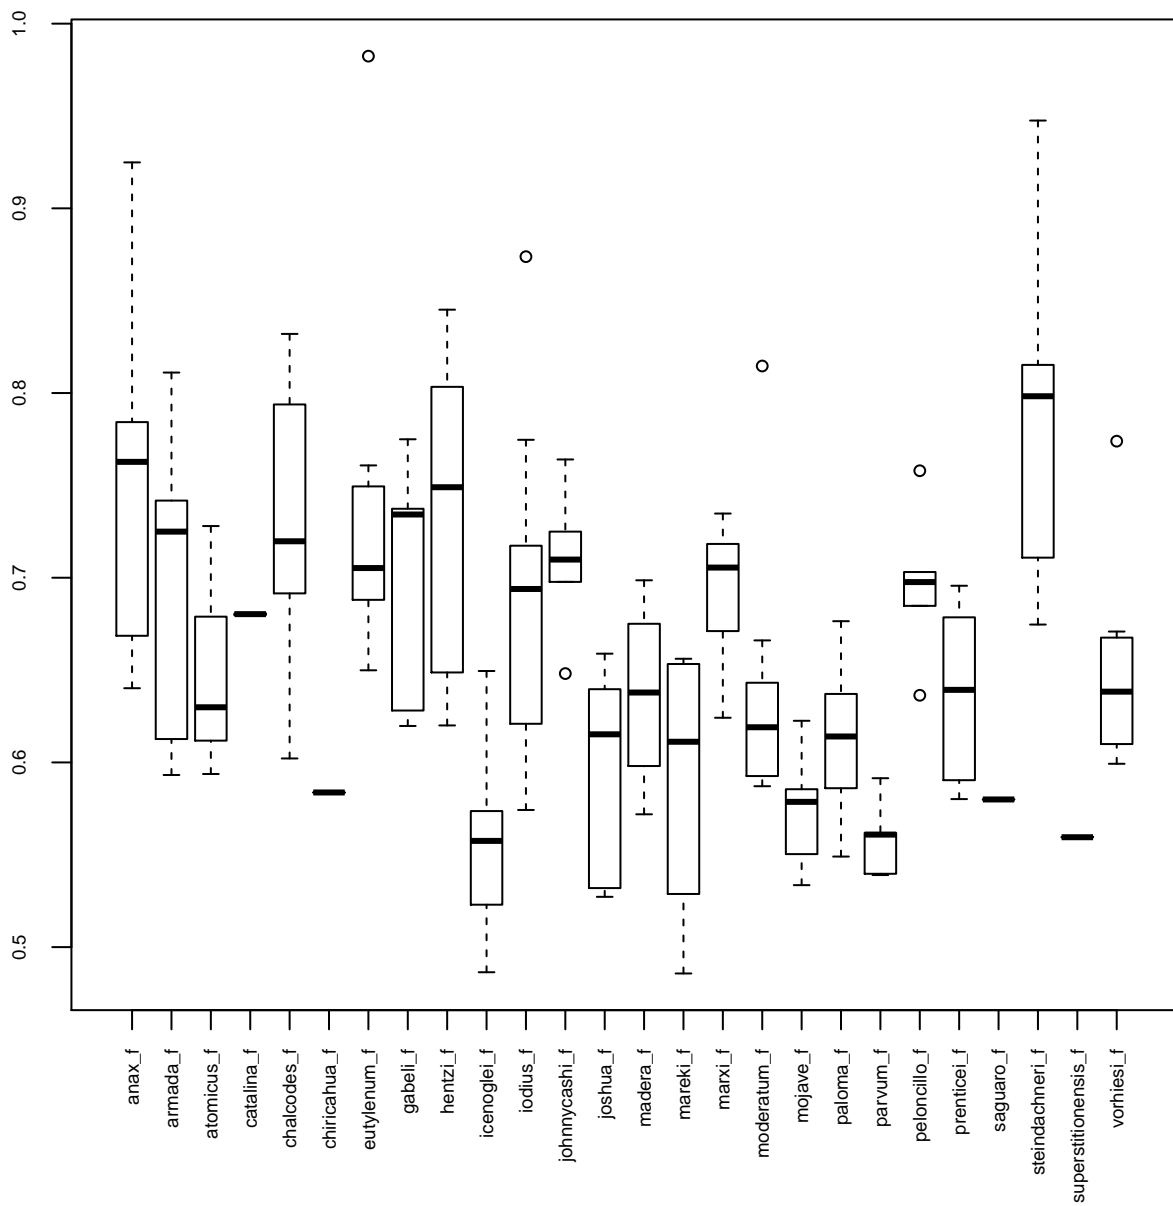

Supplement: Supplementary file 1318

## Palpal Tibia/Femur 4 Length ratio – males

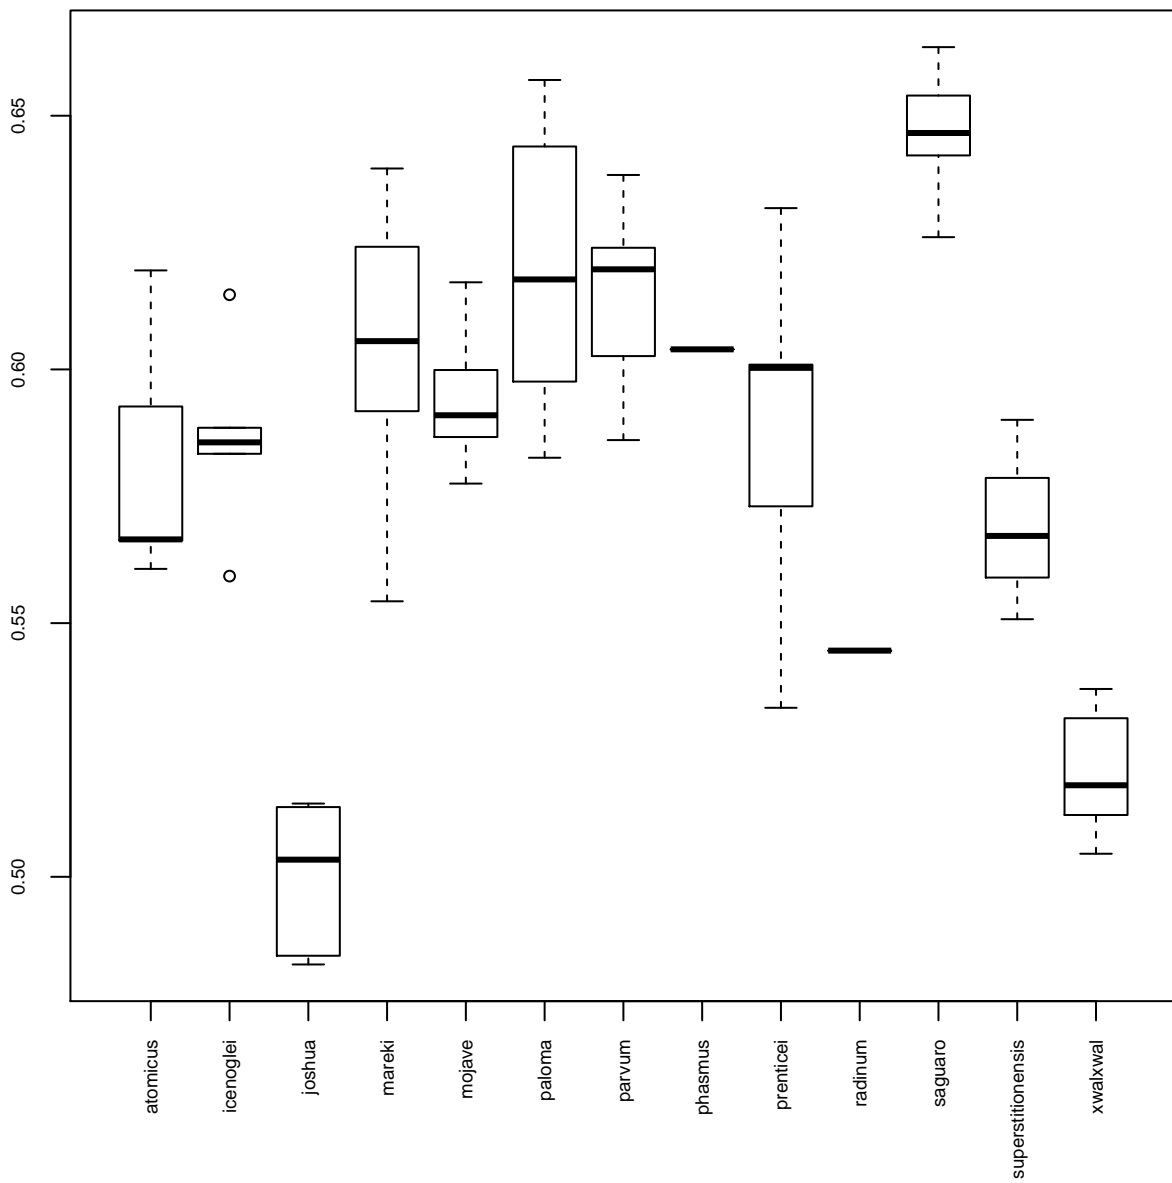

Supplement: Supplementary file 1319

## Tarsus 3/Femur 4 Length ratio – males

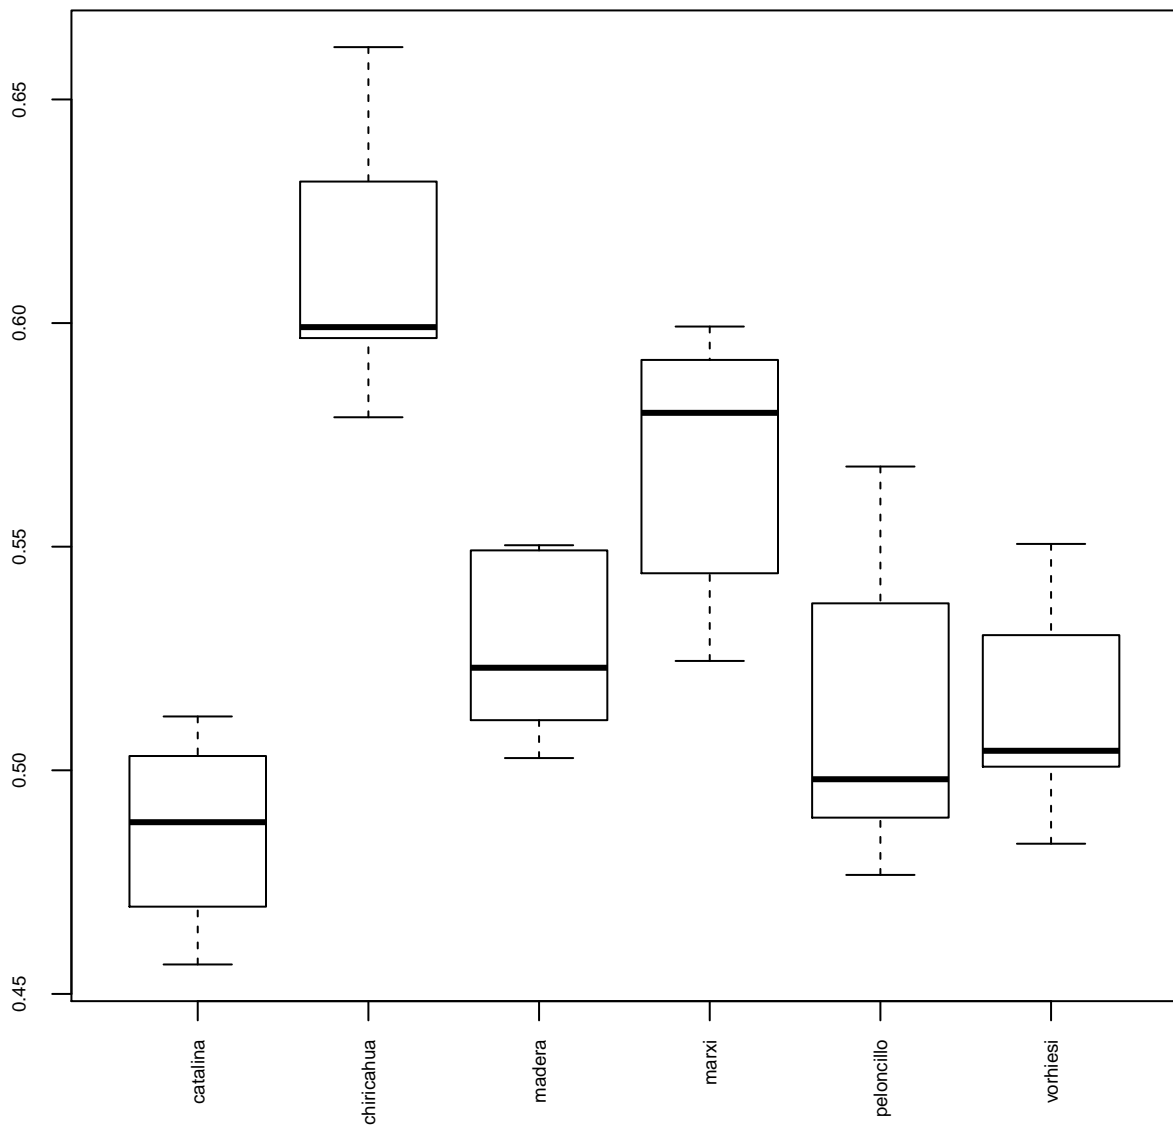

Supplement: Supplementary file 1320

## Metatarsus 1/Patella 4 Length ratio – males

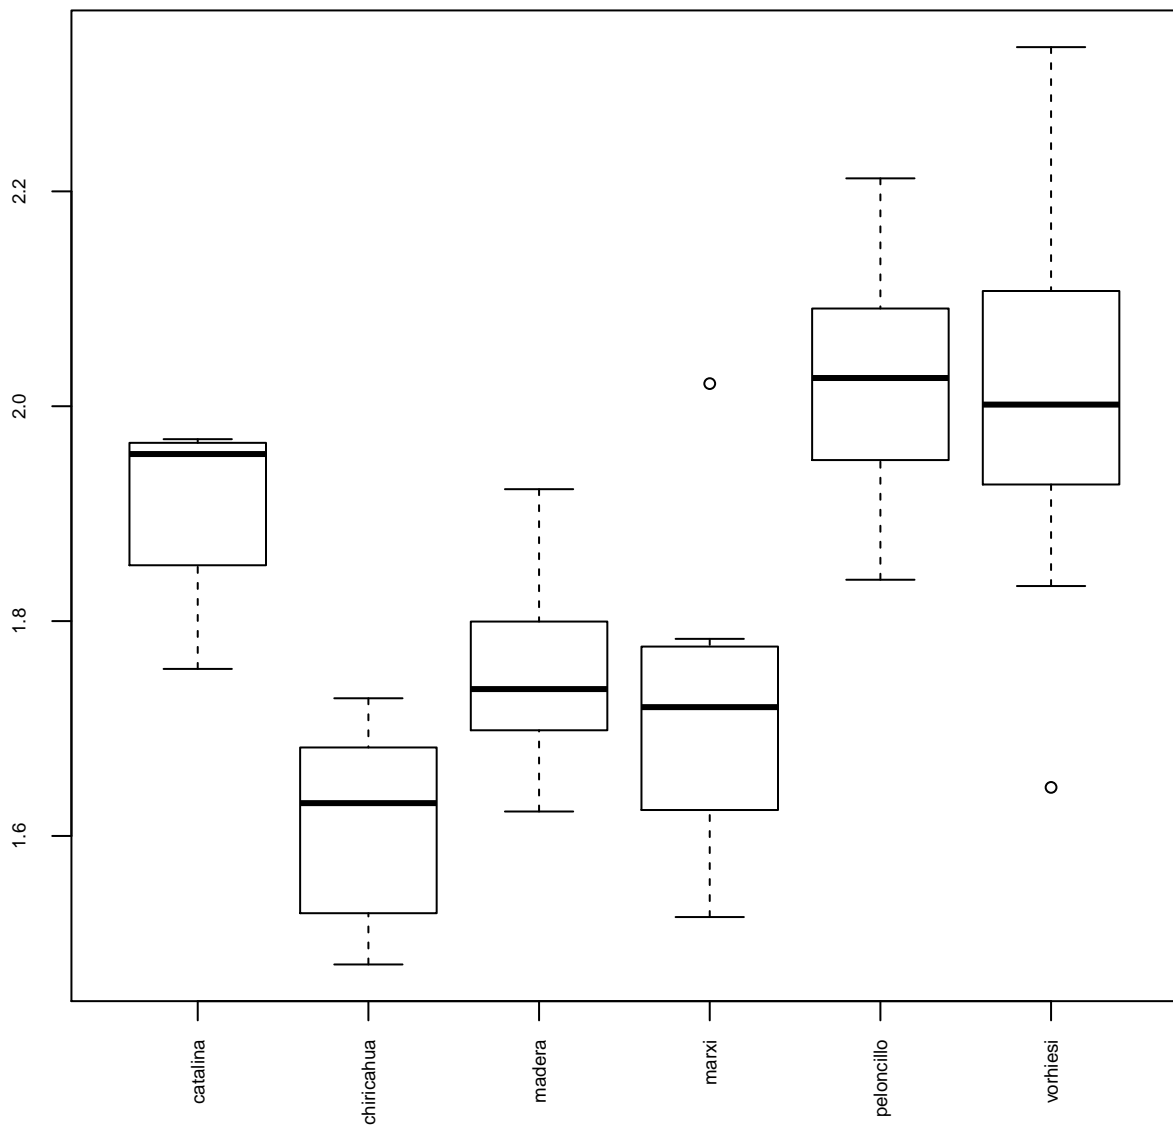

Supplement: Supplementary file 1321

## Tarsus 1/Patella 4 Length ratio – females

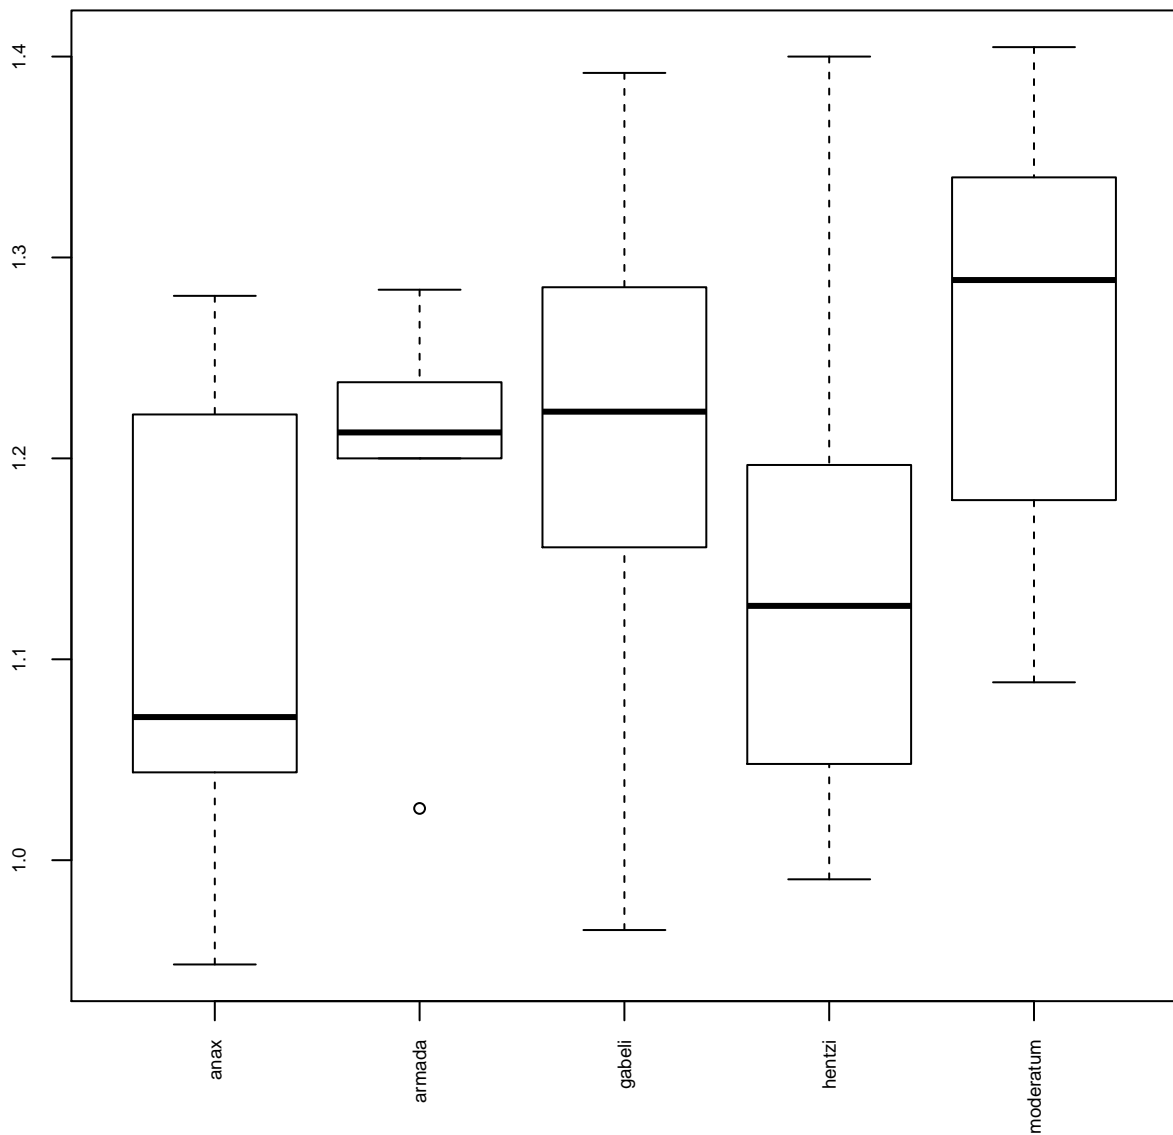

Supplement: Supplementary file 1322

## Tarsus 3/Tarsus 4 ratio – males

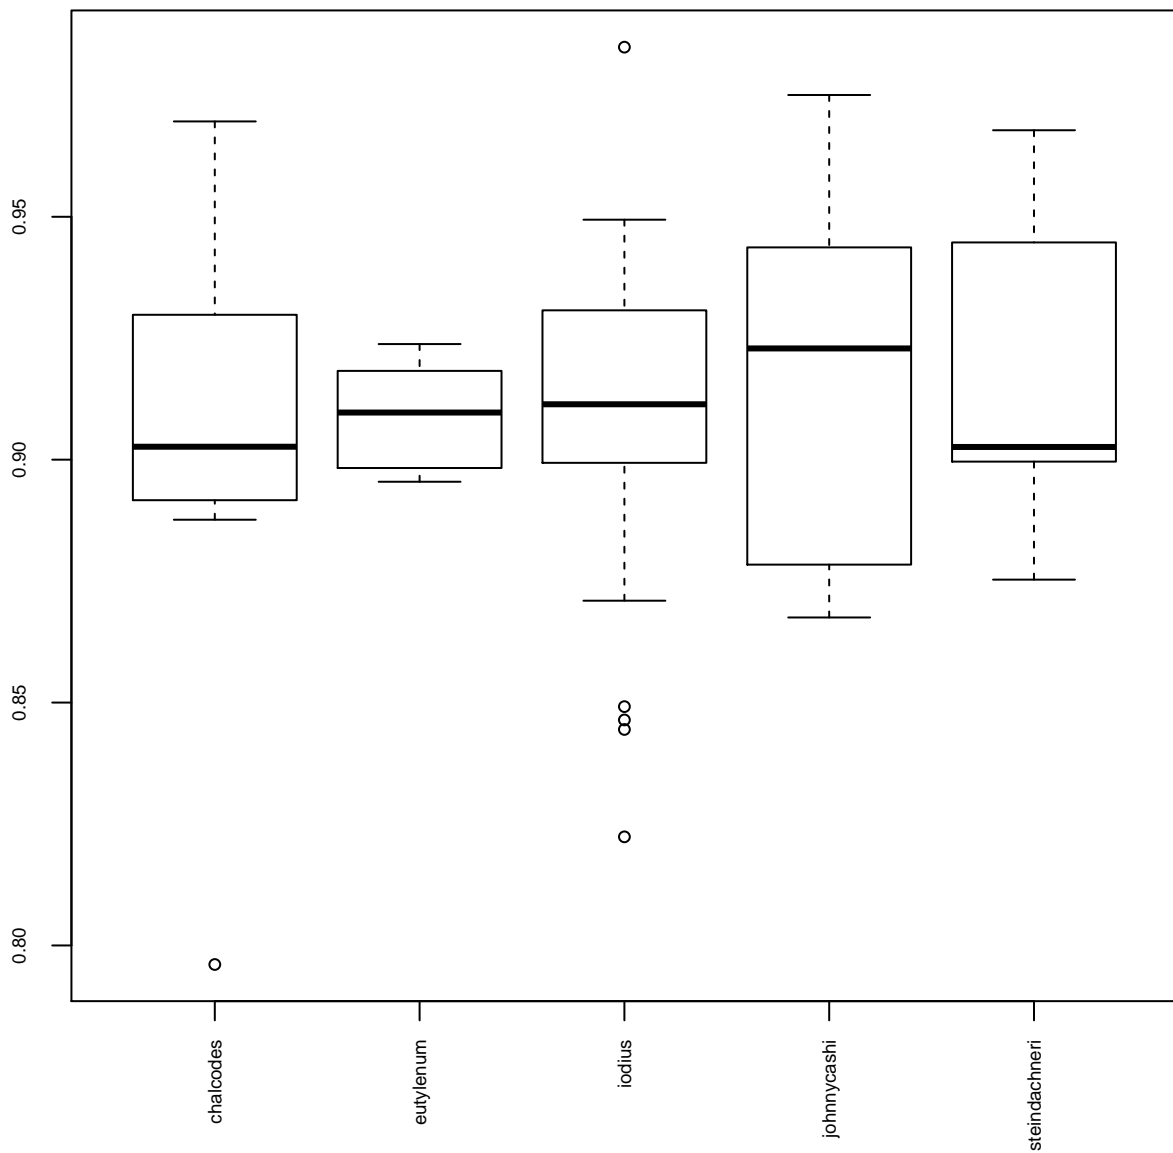

Supplement: Supplementary file 1323

## Femur 3/Tibia 4 Length ratio – females

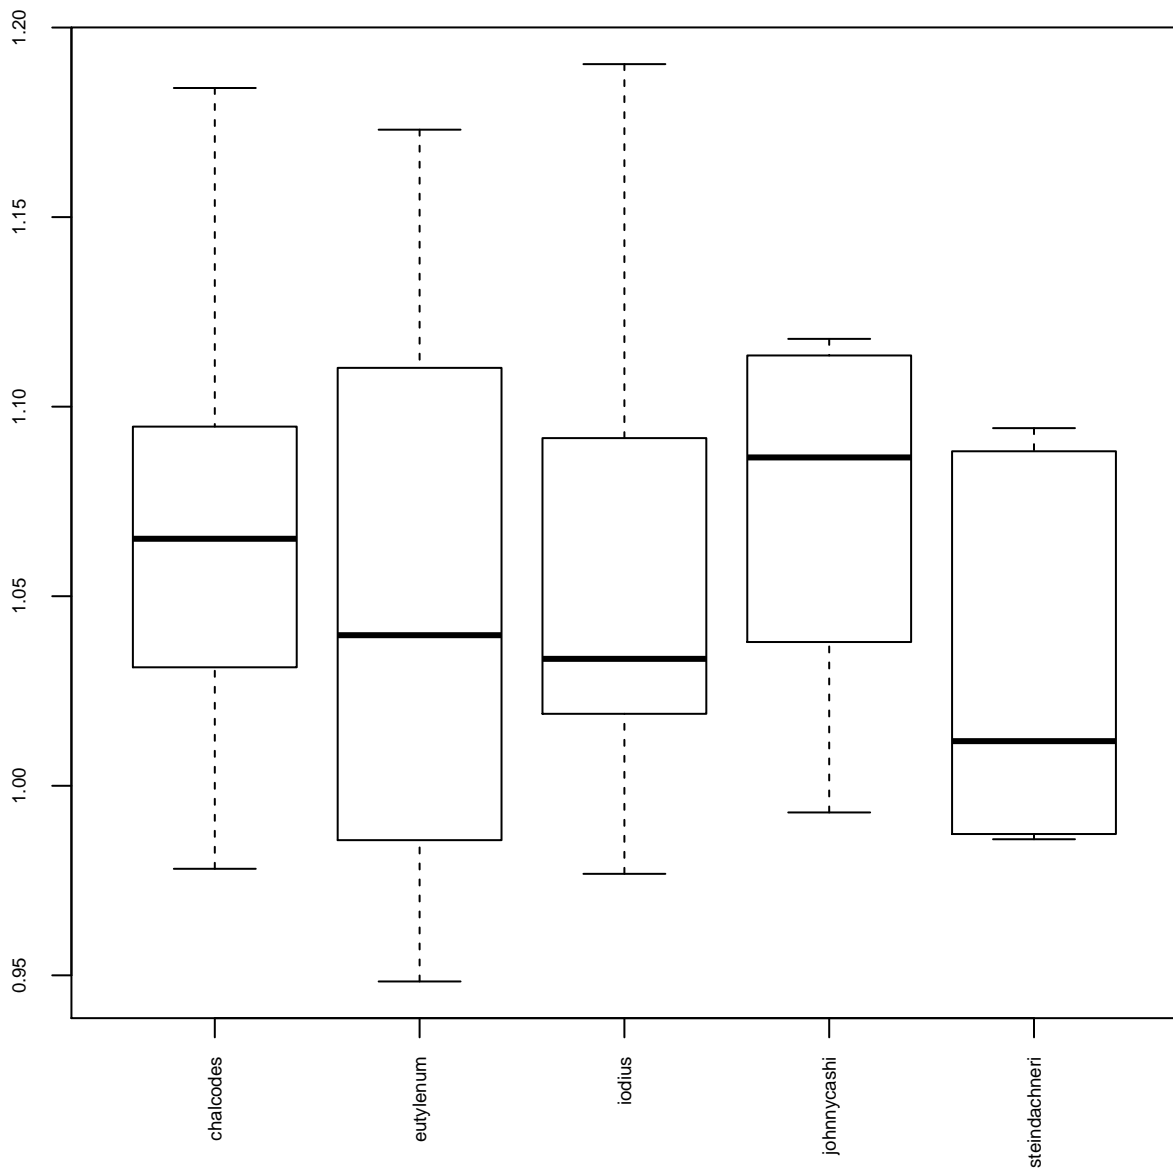

Supplement: Supplementary file 1324

## Metatarsus 3/Femur 4 Length ratio – females

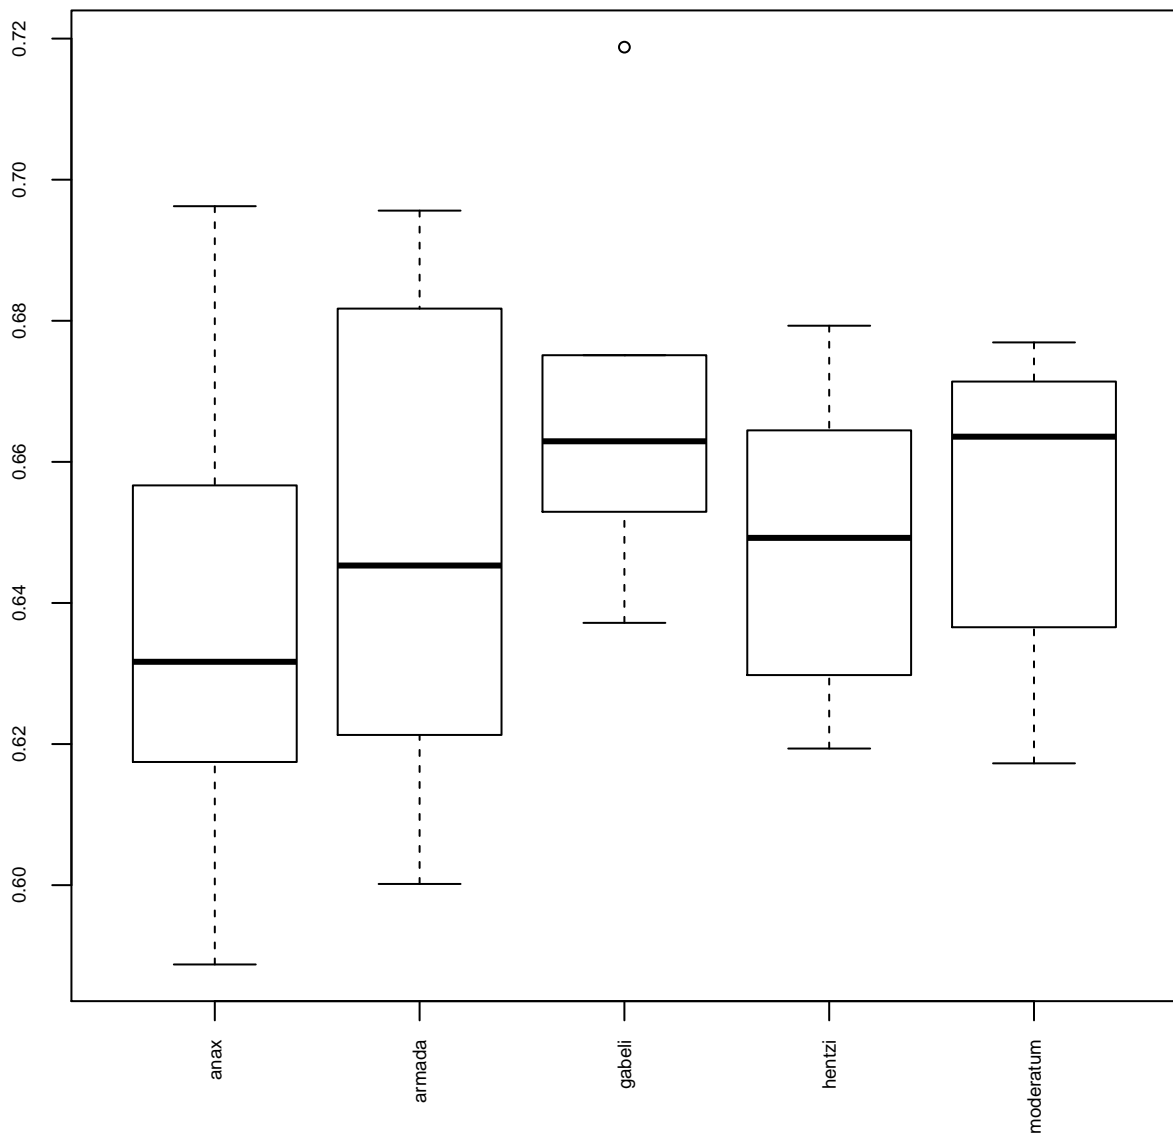

Supplement: Supplementary file 1325

# Femur 3/Patella 3 ratio – males

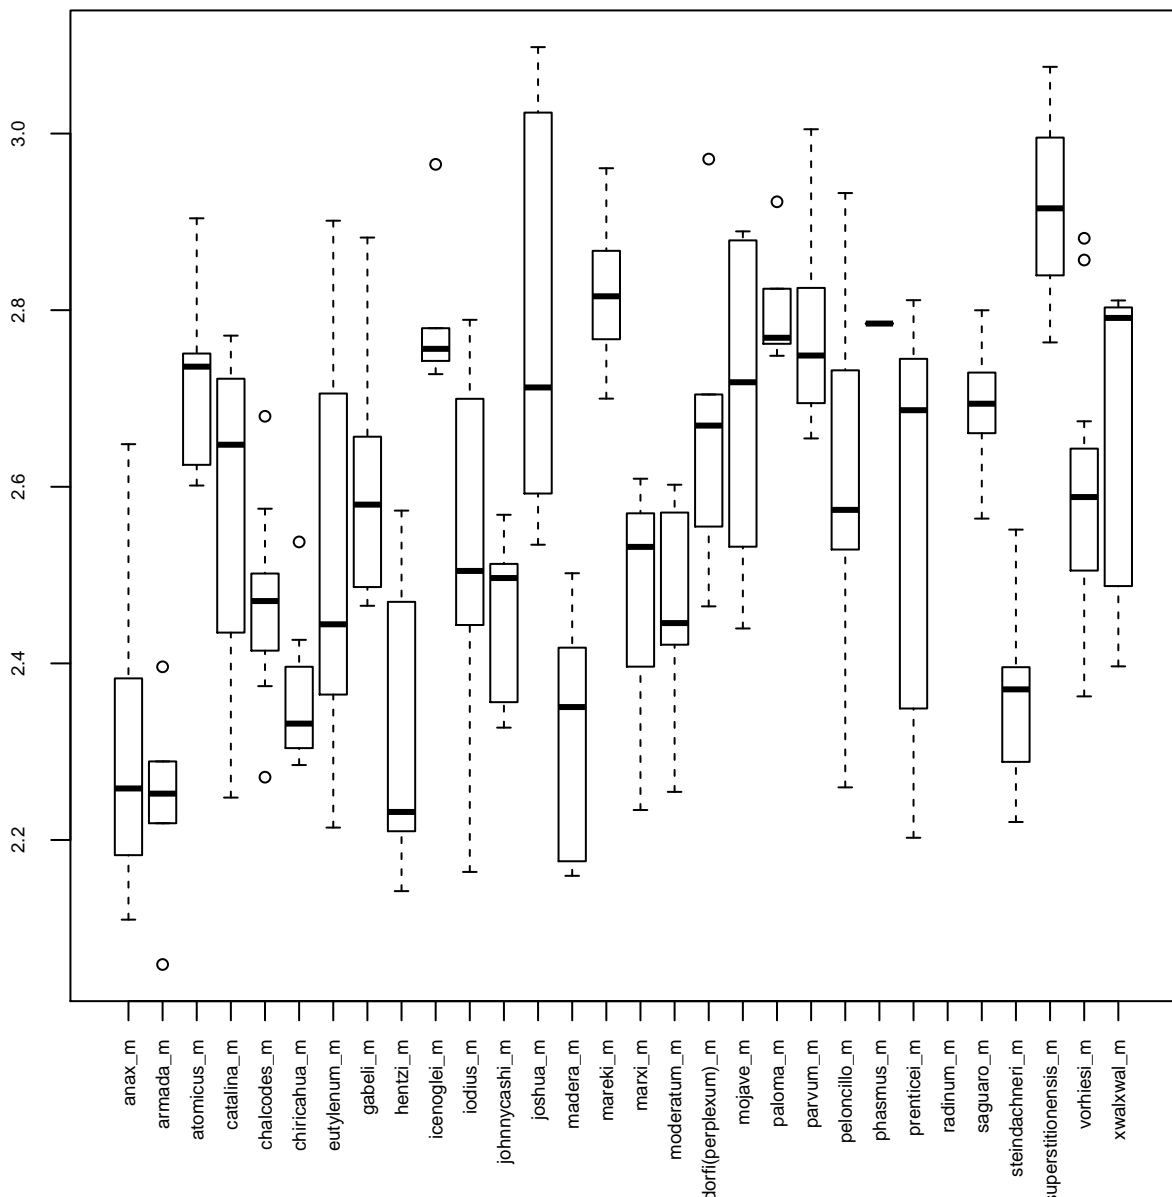

Supplement: Supplementary file 1326

## Carapace Length/Femur 3 ratio – males

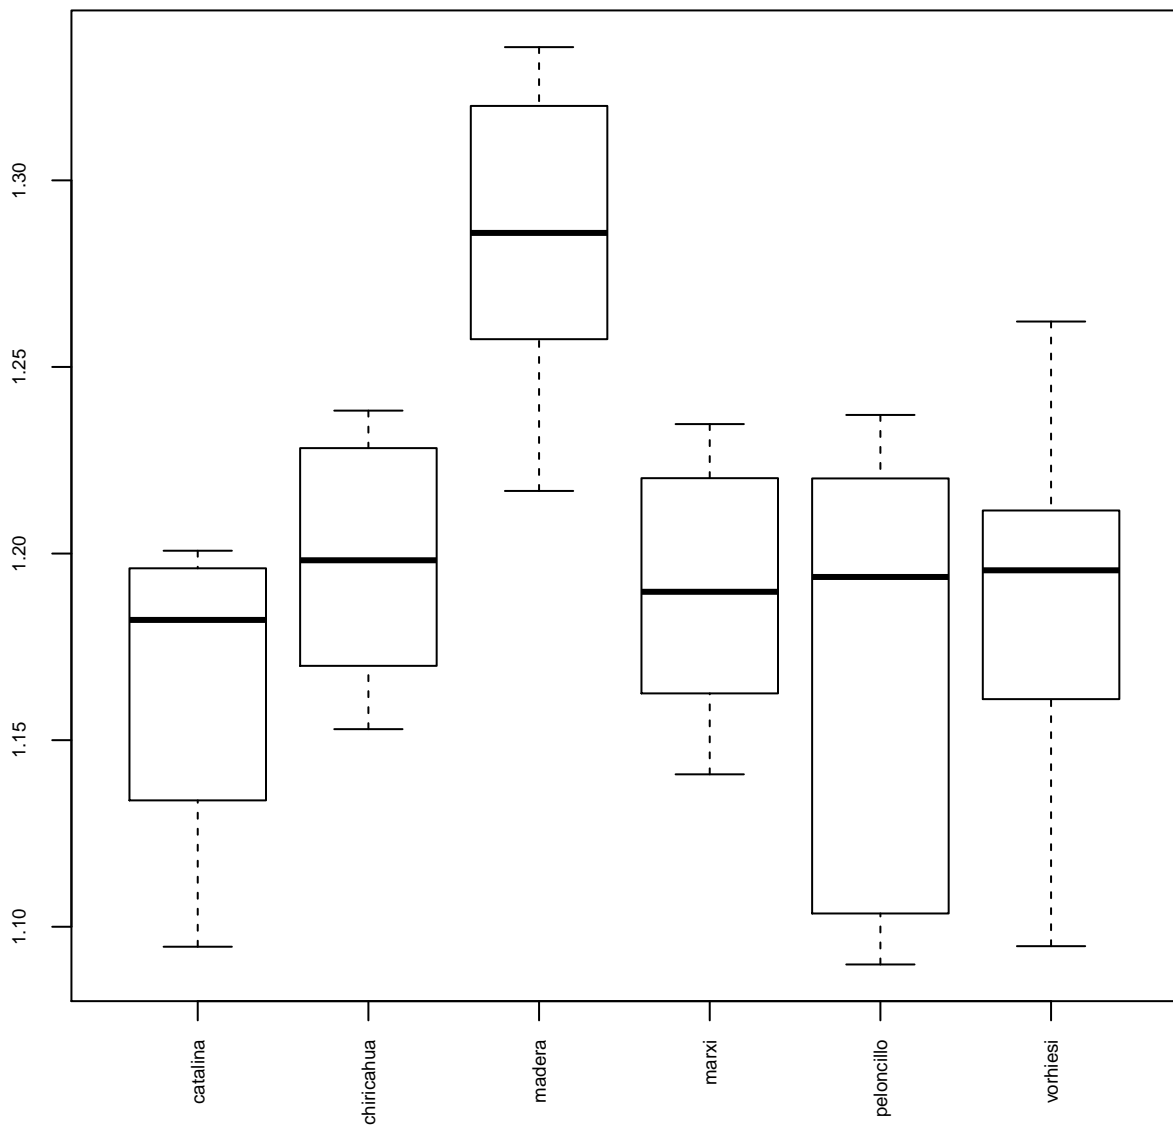

Supplement: Supplementary file 1327

## Patella 1/Metatarsus 1 ratio – males

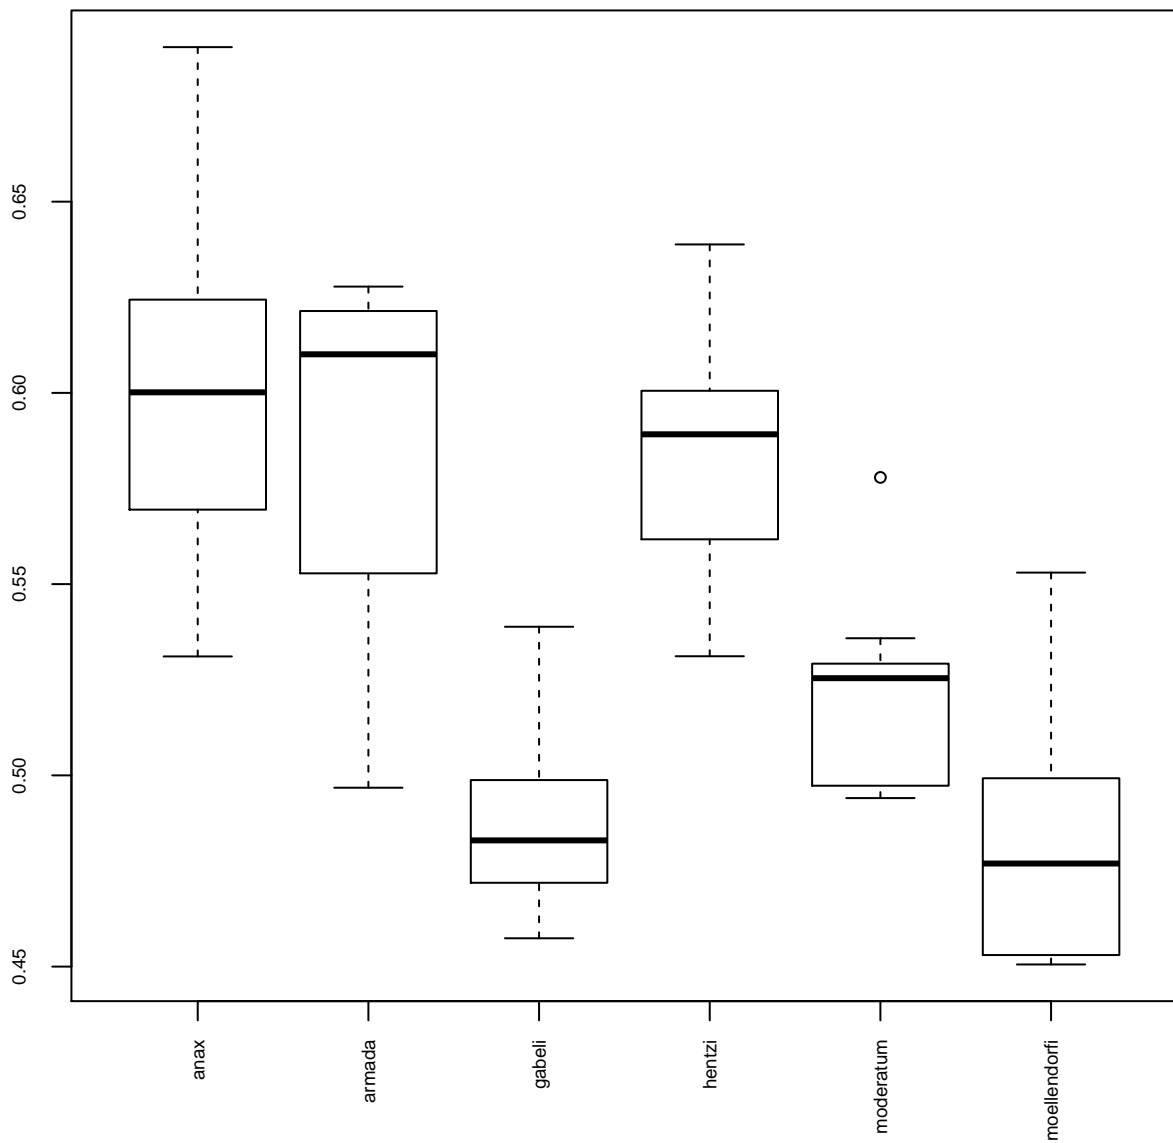

Supplement: Supplementary file 1328

## Metatarsus 3/Tibia 4 Length ratio – females

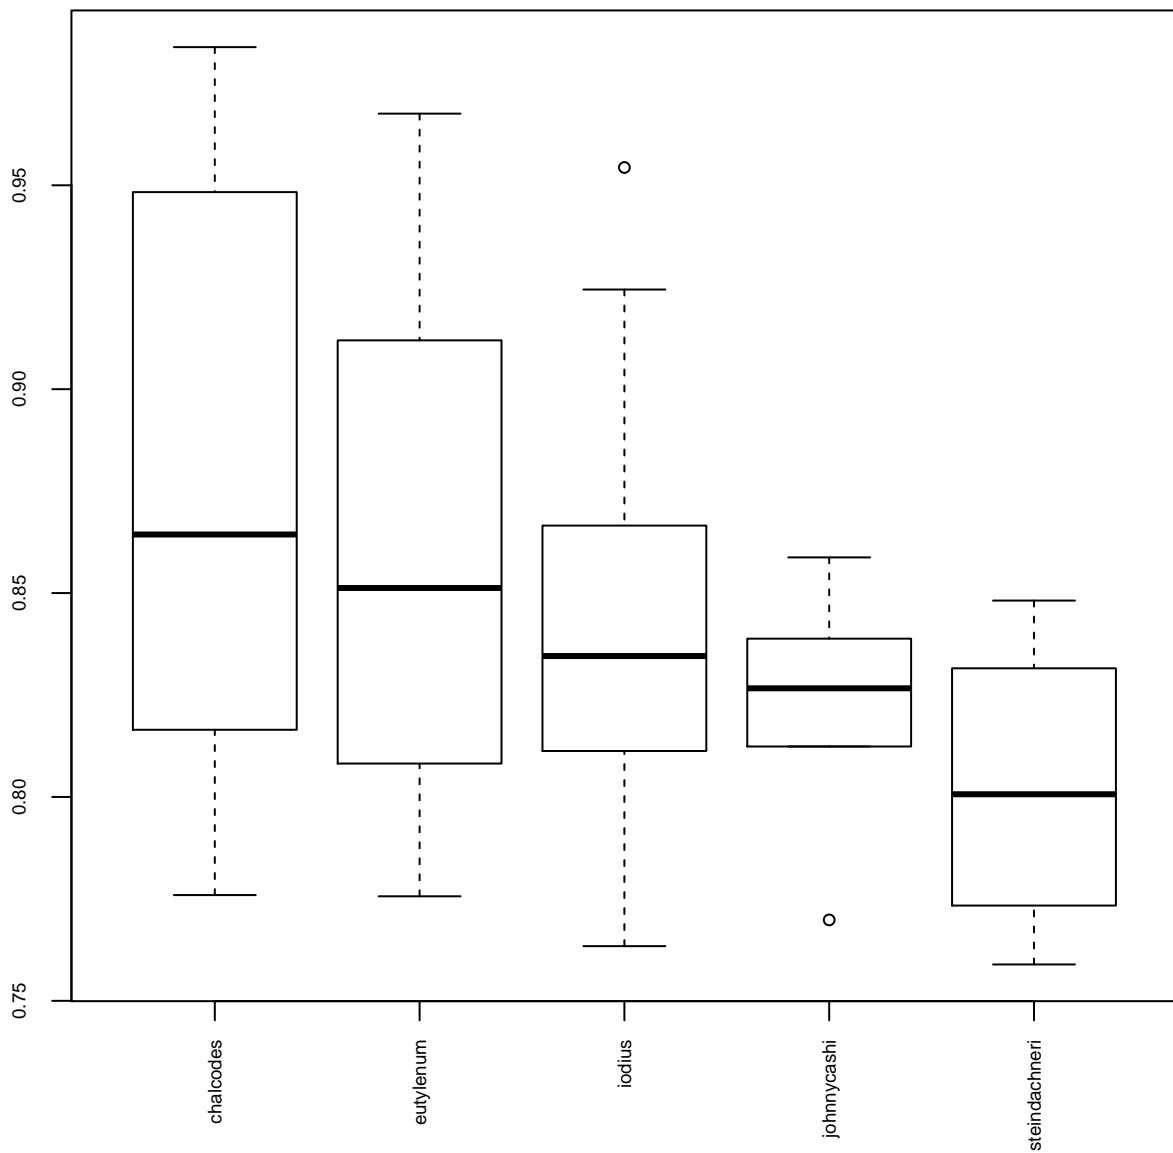

Supplement: Supplementary file 1329

## Metatarsus 1/Metatarsus 4 ratio – females

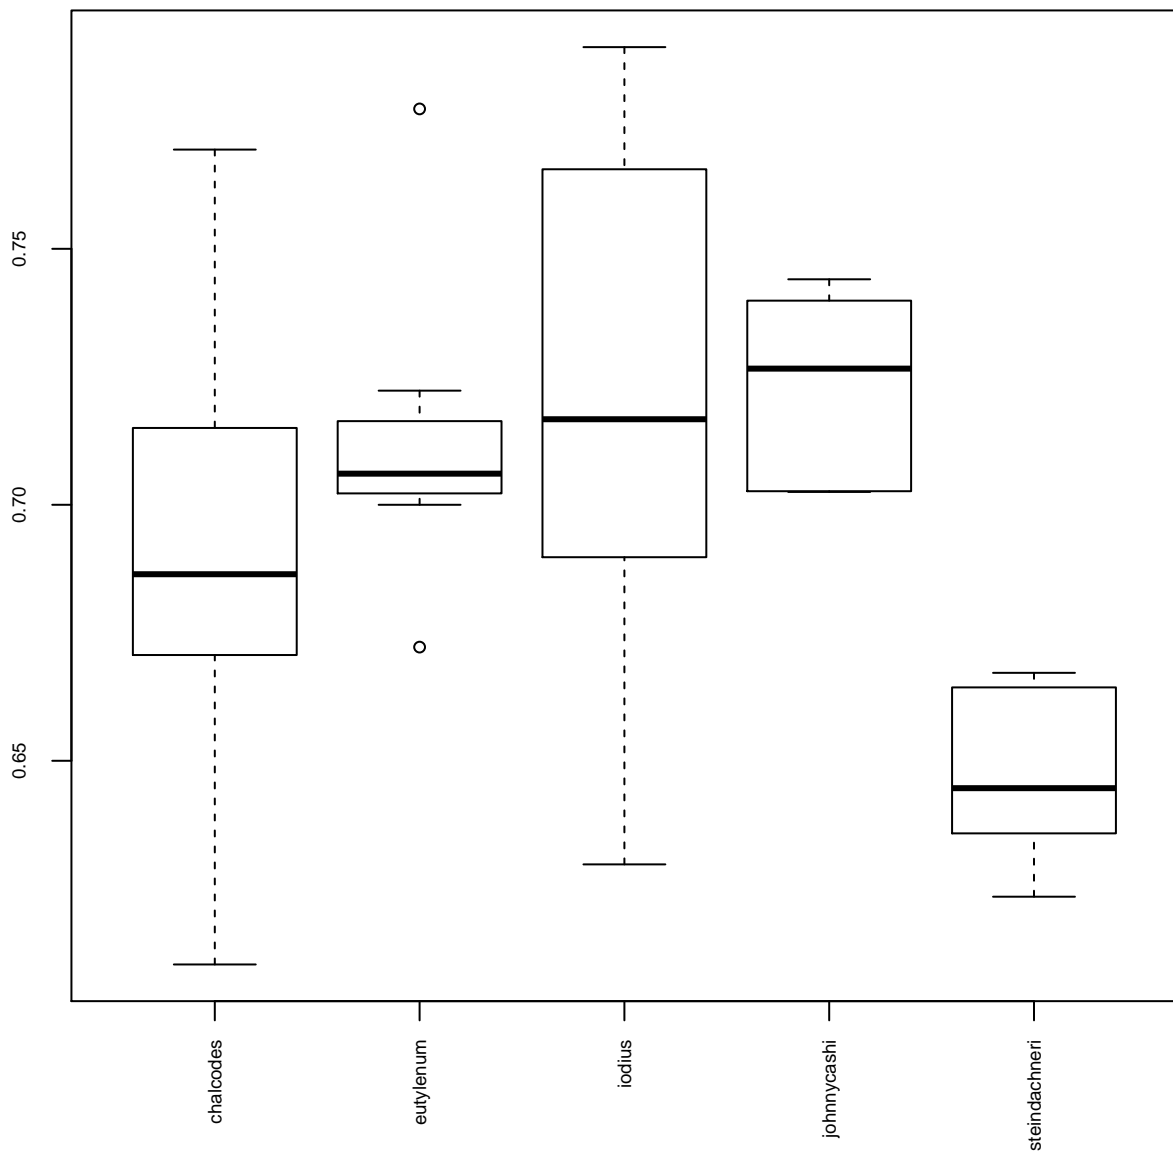

Supplement: Supplementary file 1330

## Tibia 1/Tibia 3 ratio – males

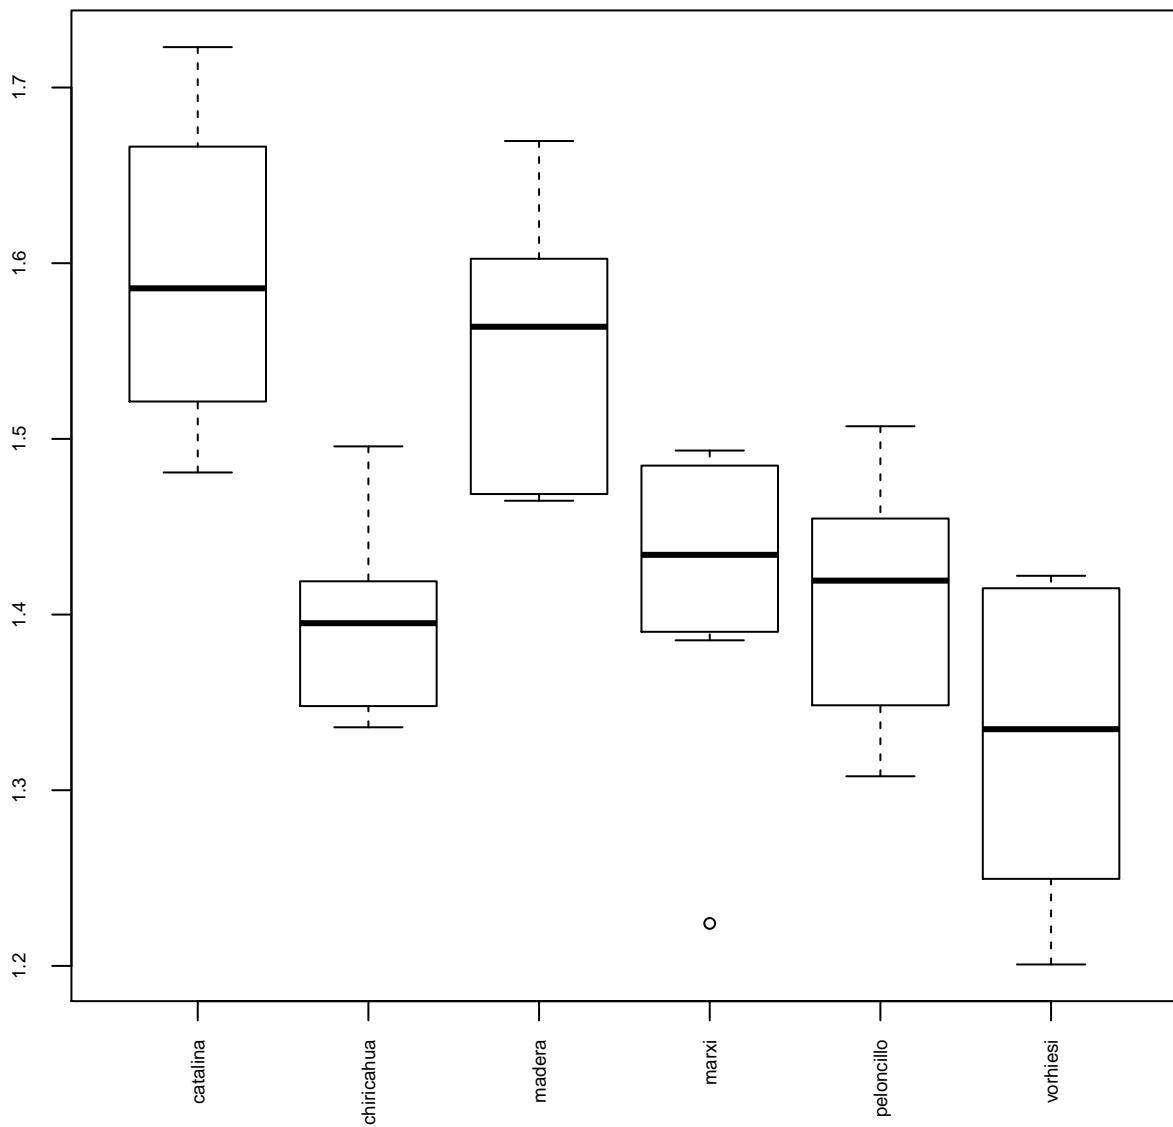

Supplement: Supplementary file 1331

# Femur 4/Tarsus 4 ratio – females

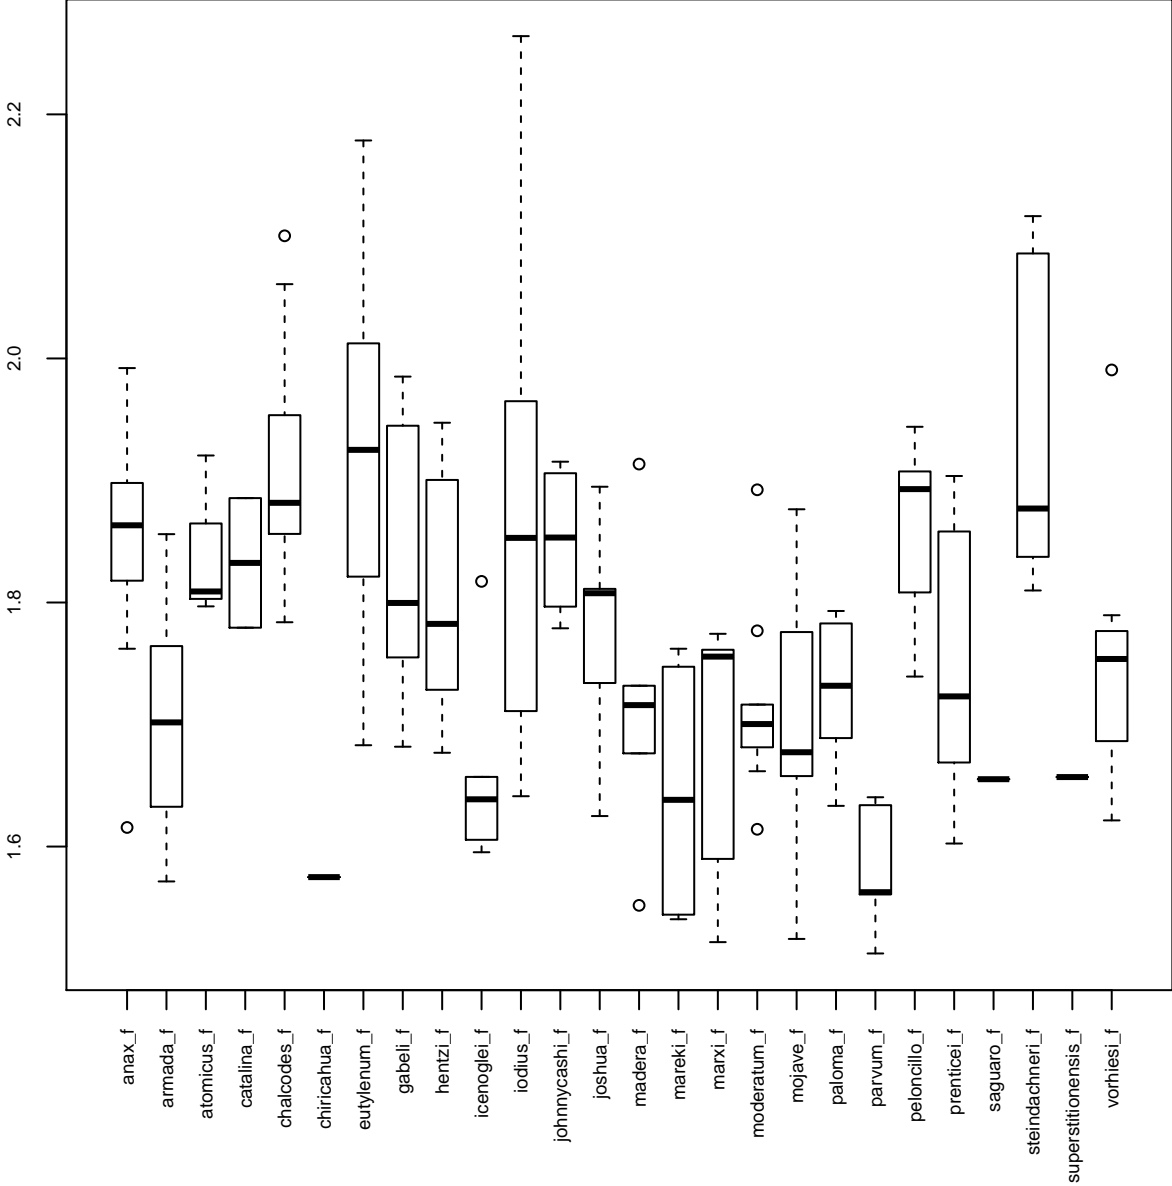

Supplement: Supplementary file 1332

# Patella 3/Tarsus 4 Length ratio – males

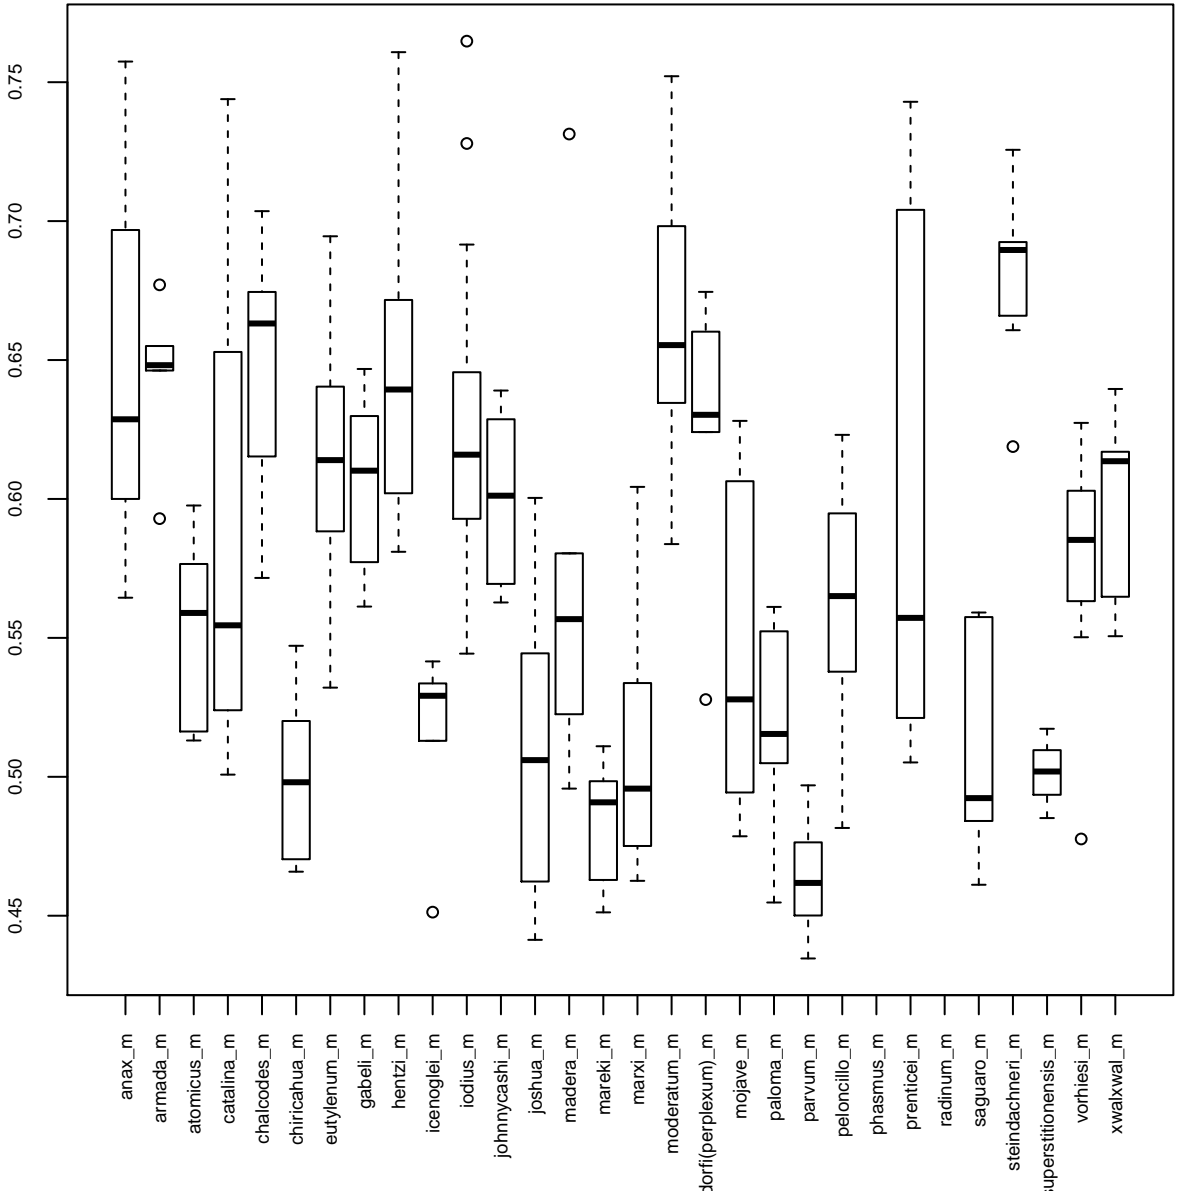

Supplement: Supplementary file 1333

# Tibia 3/Femur 4 Length ratio – males

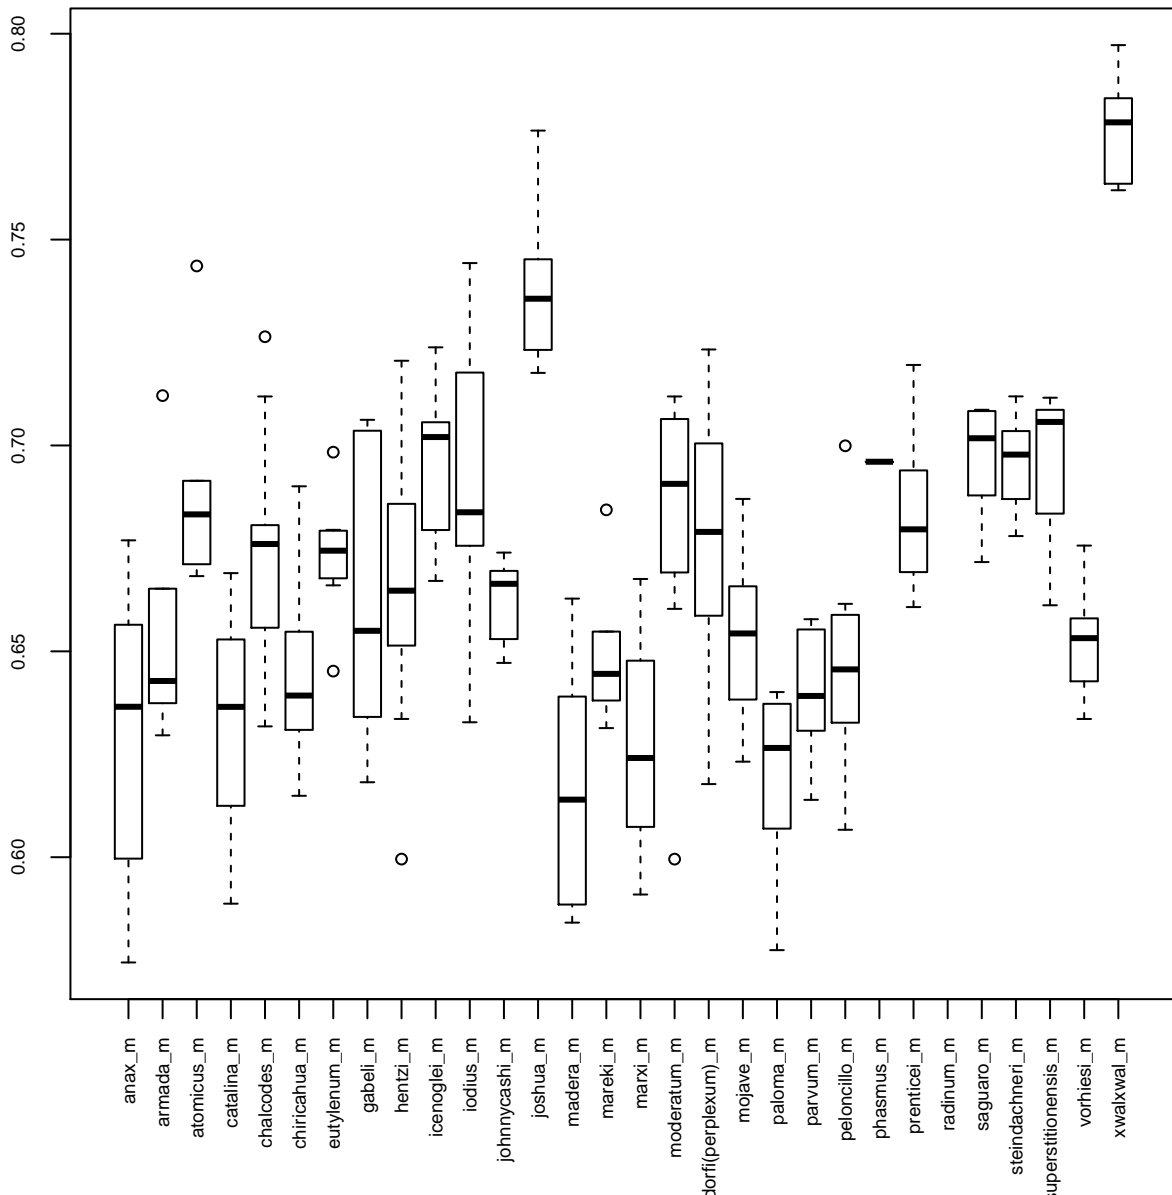

Supplement: Supplementary file 1334

## Tibia 3/Tibia 4 ratio – males

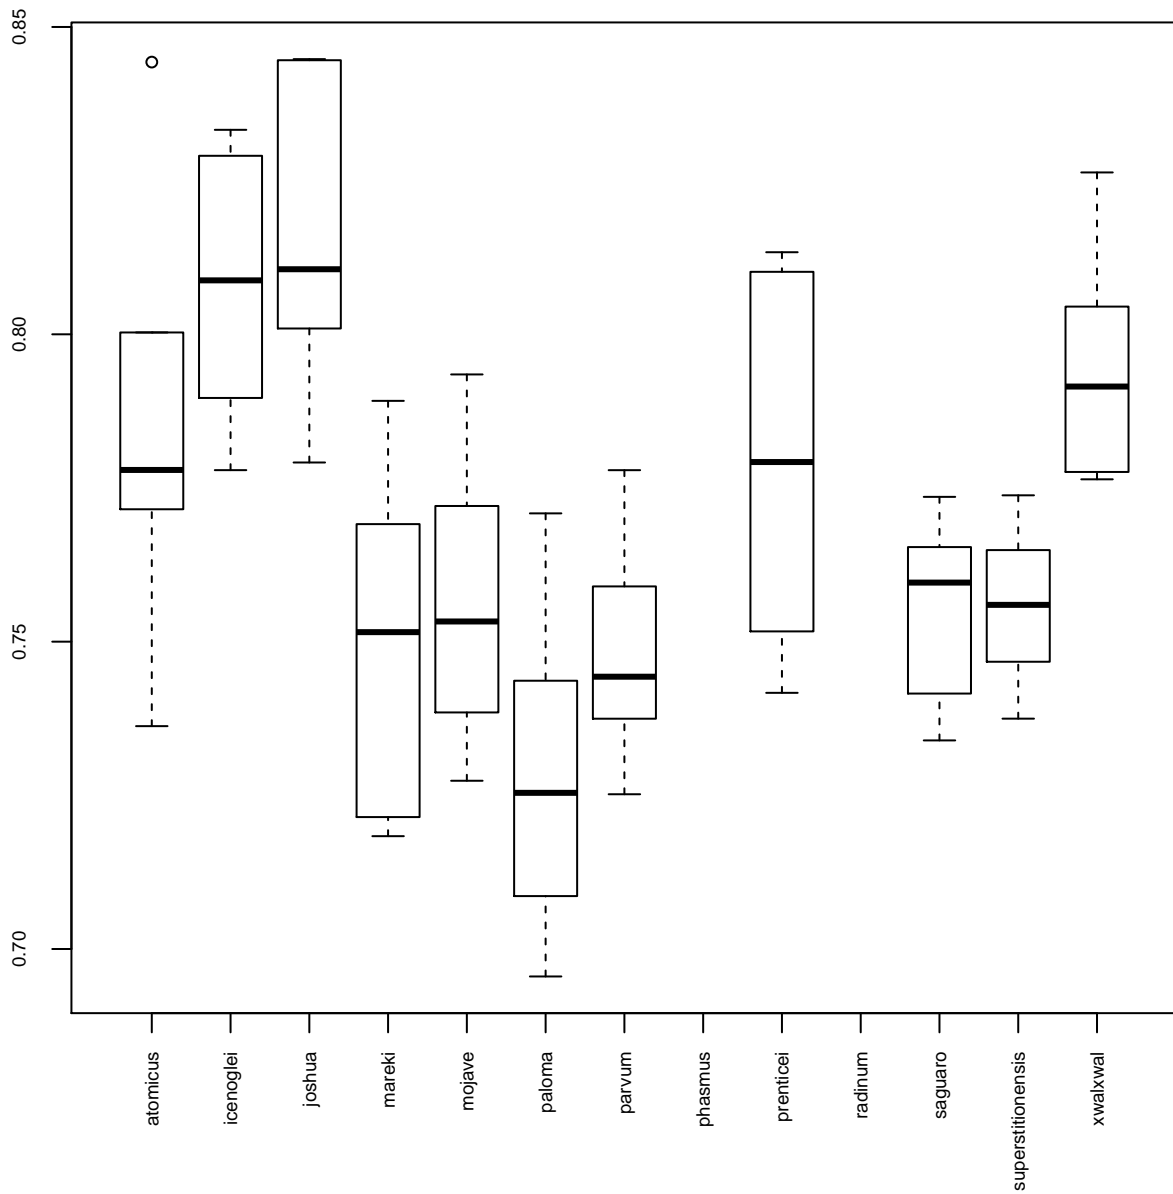

Supplement: Supplementary file 1335

## Tarsus 1/Tibia 4 Length ratio – females

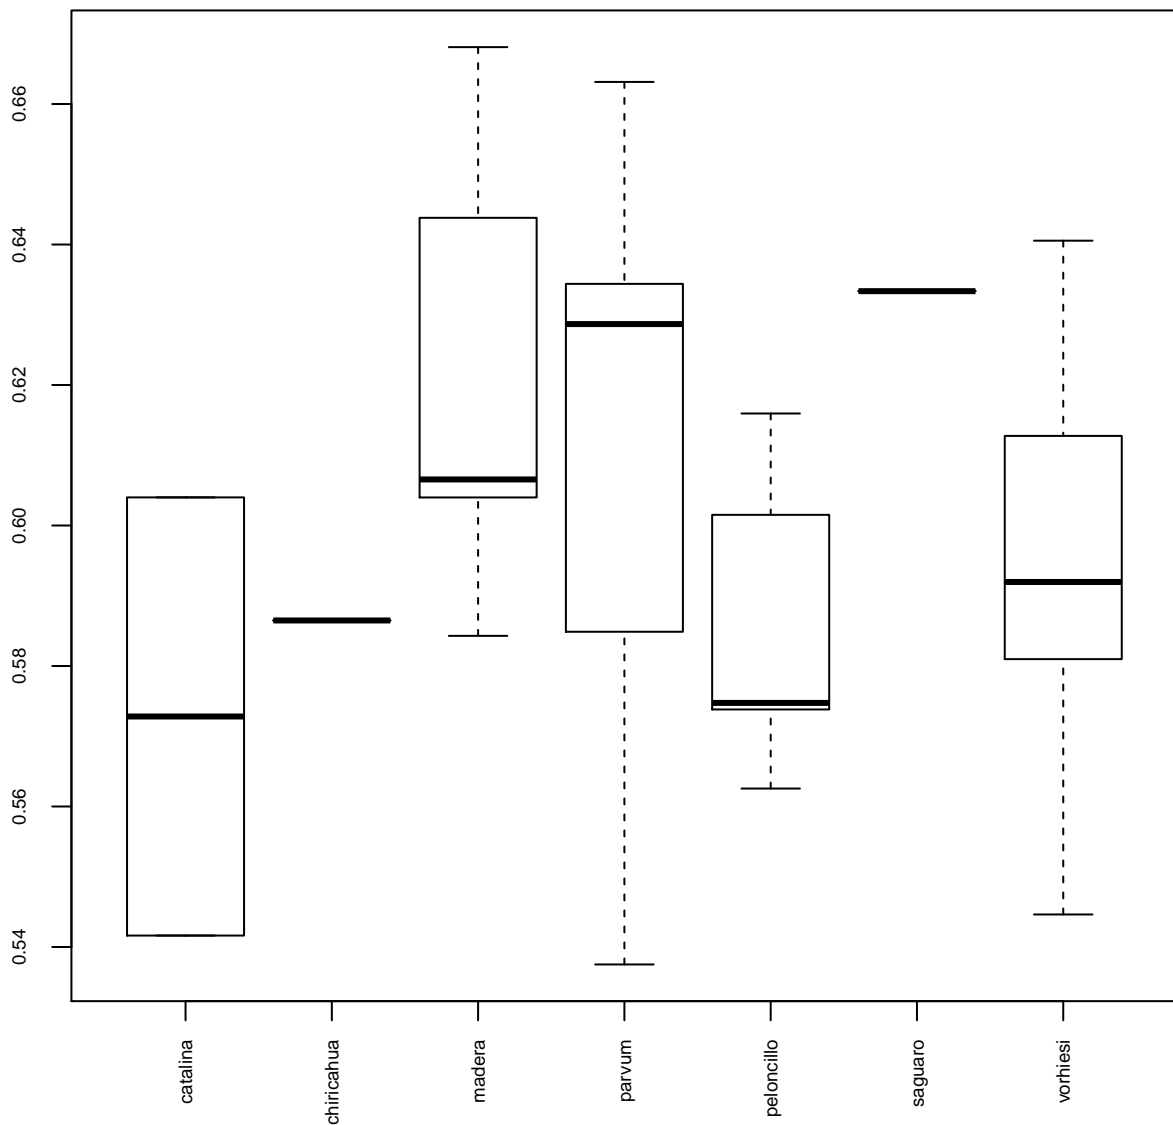

Supplement: Supplementary file 1336

# Patella 1/Metatarsus 4 Length ratio – females

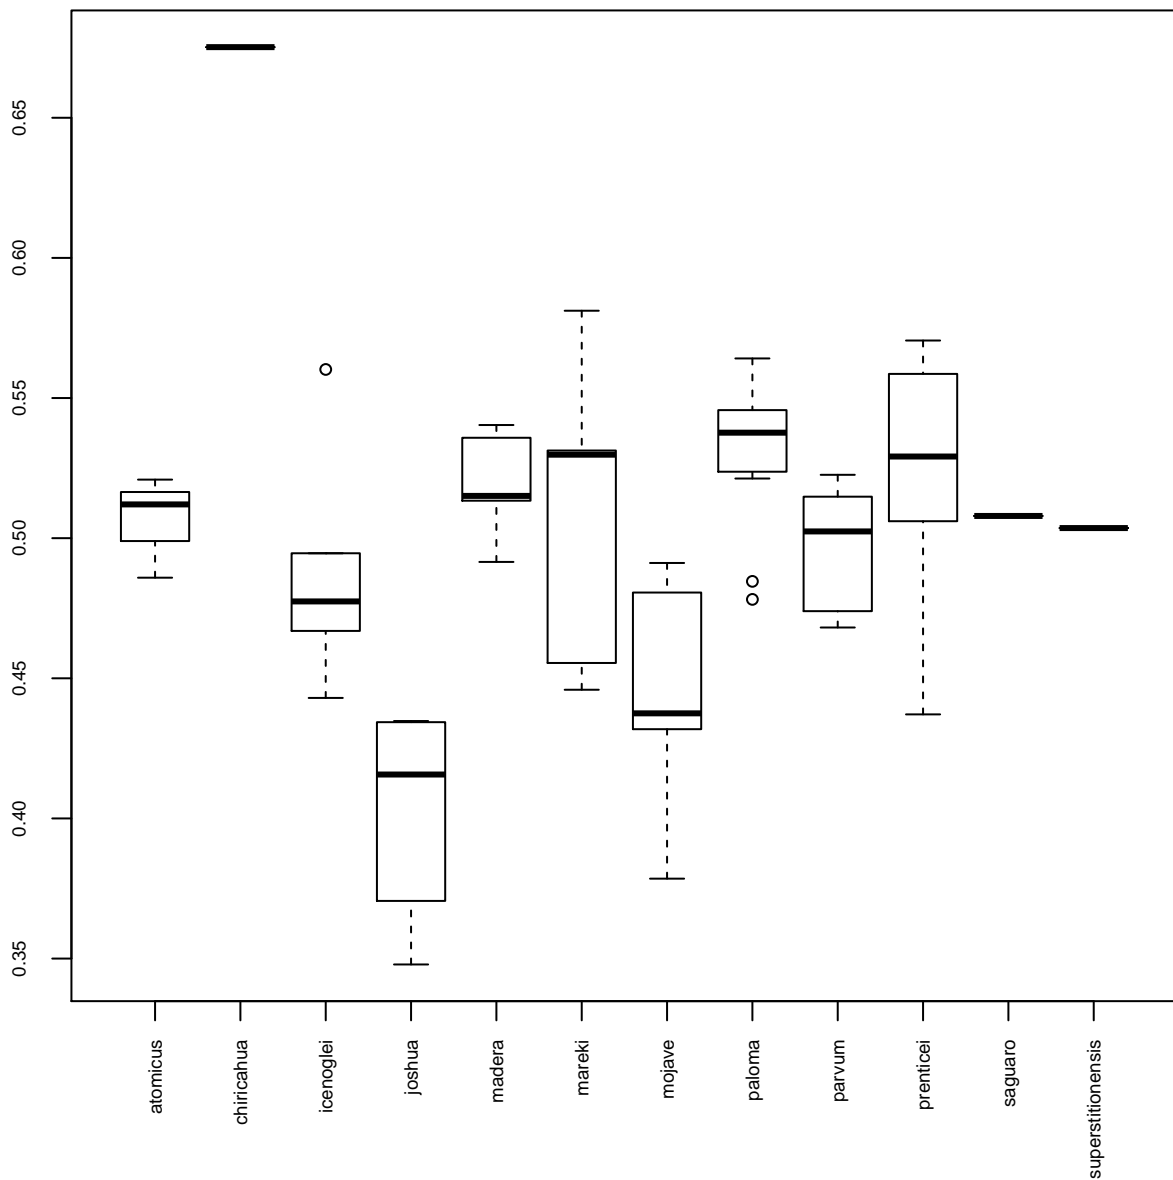

Supplement: Supplementary file 1337

## Metatarsus 1/Tarsus 4 Length ratio – males

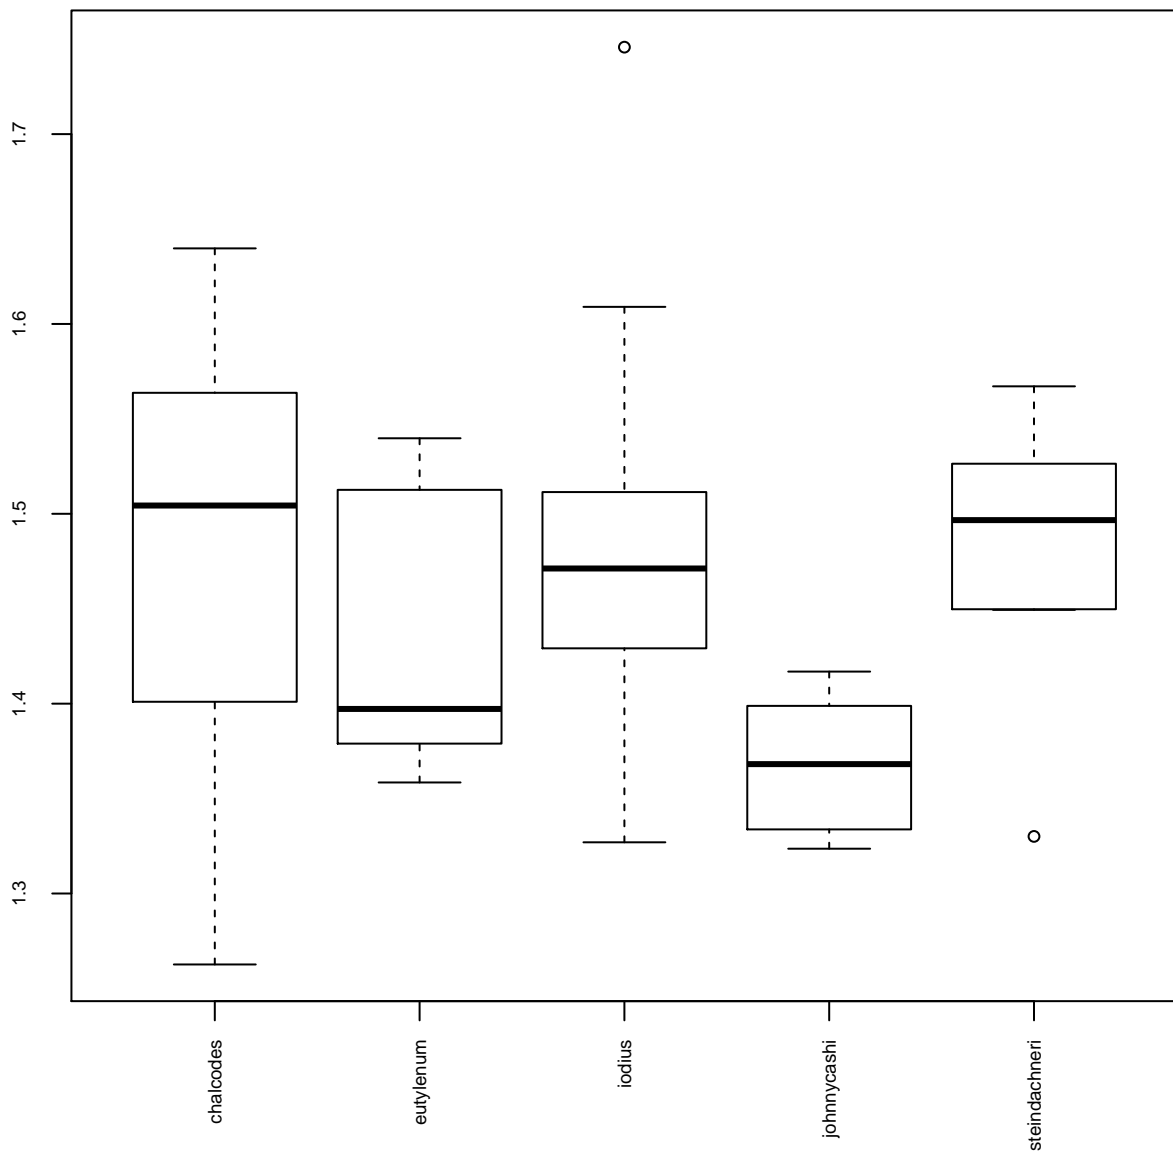

Supplement: Supplementary file 1338

## Palpal Tibia/Femur 1 Length ratio – males

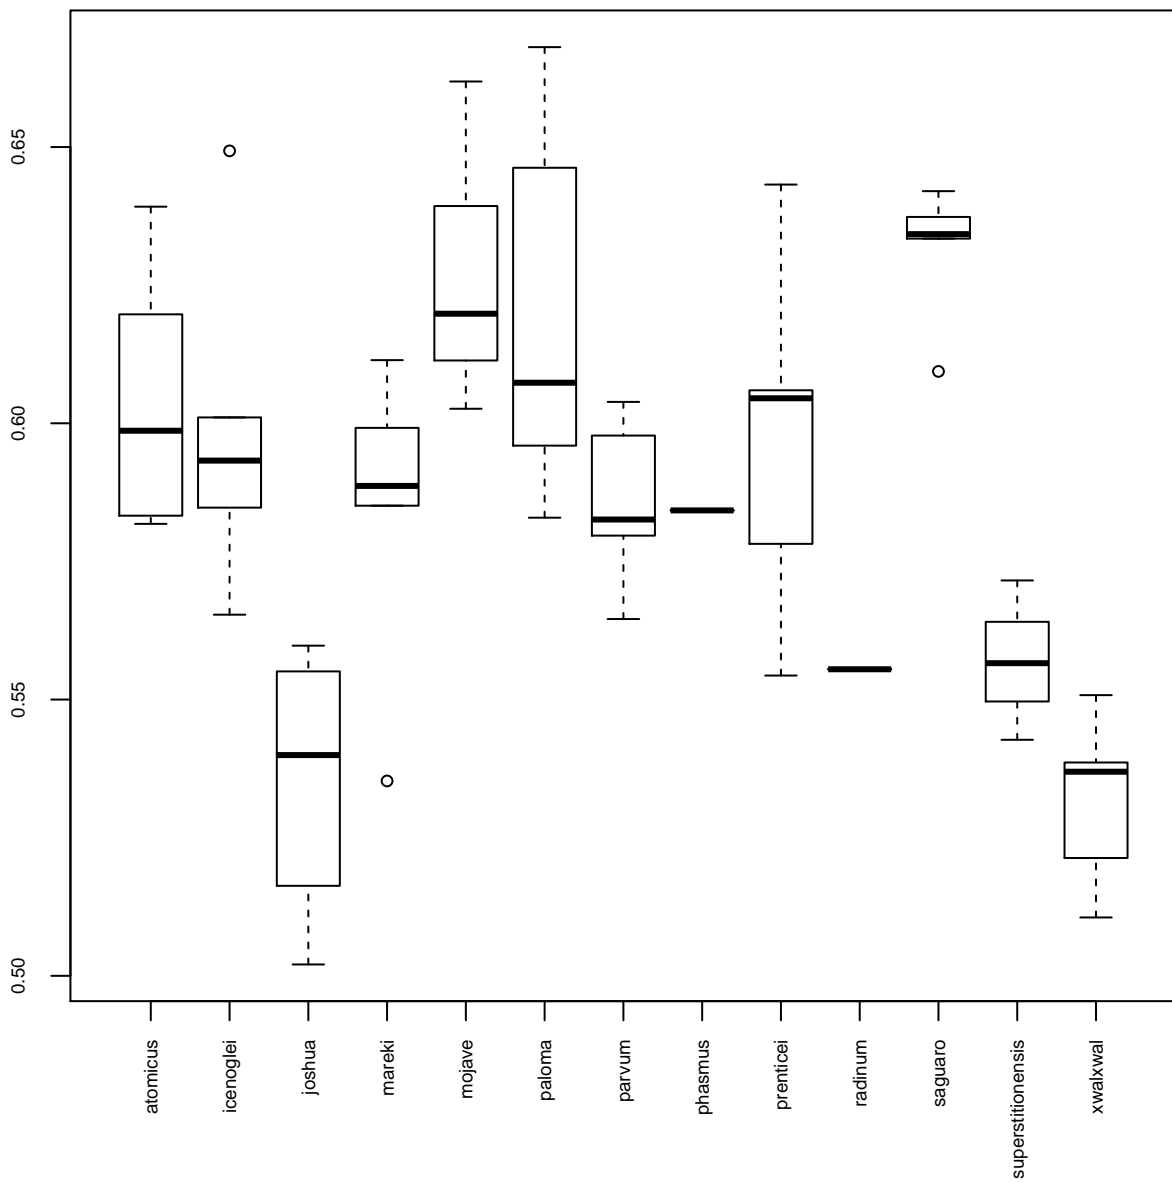

Supplement: Supplementary file 1339

## Femur 3/Tarsus 3 ratio – males

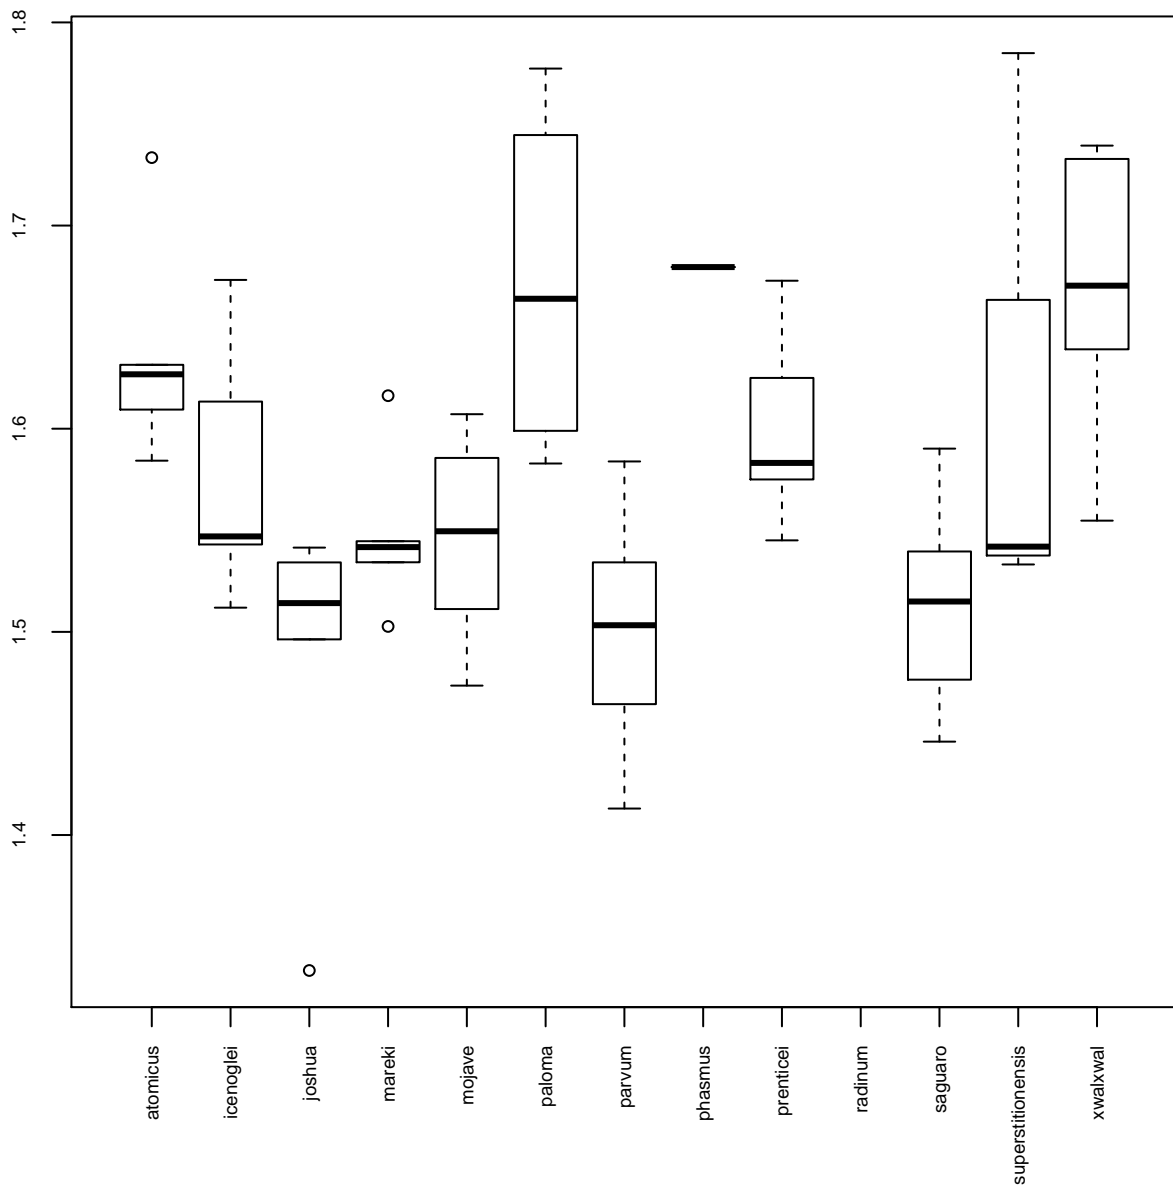

Supplement: Supplementary file 1340

## Metatarsus 1/Metatarsus 3 ratio – males

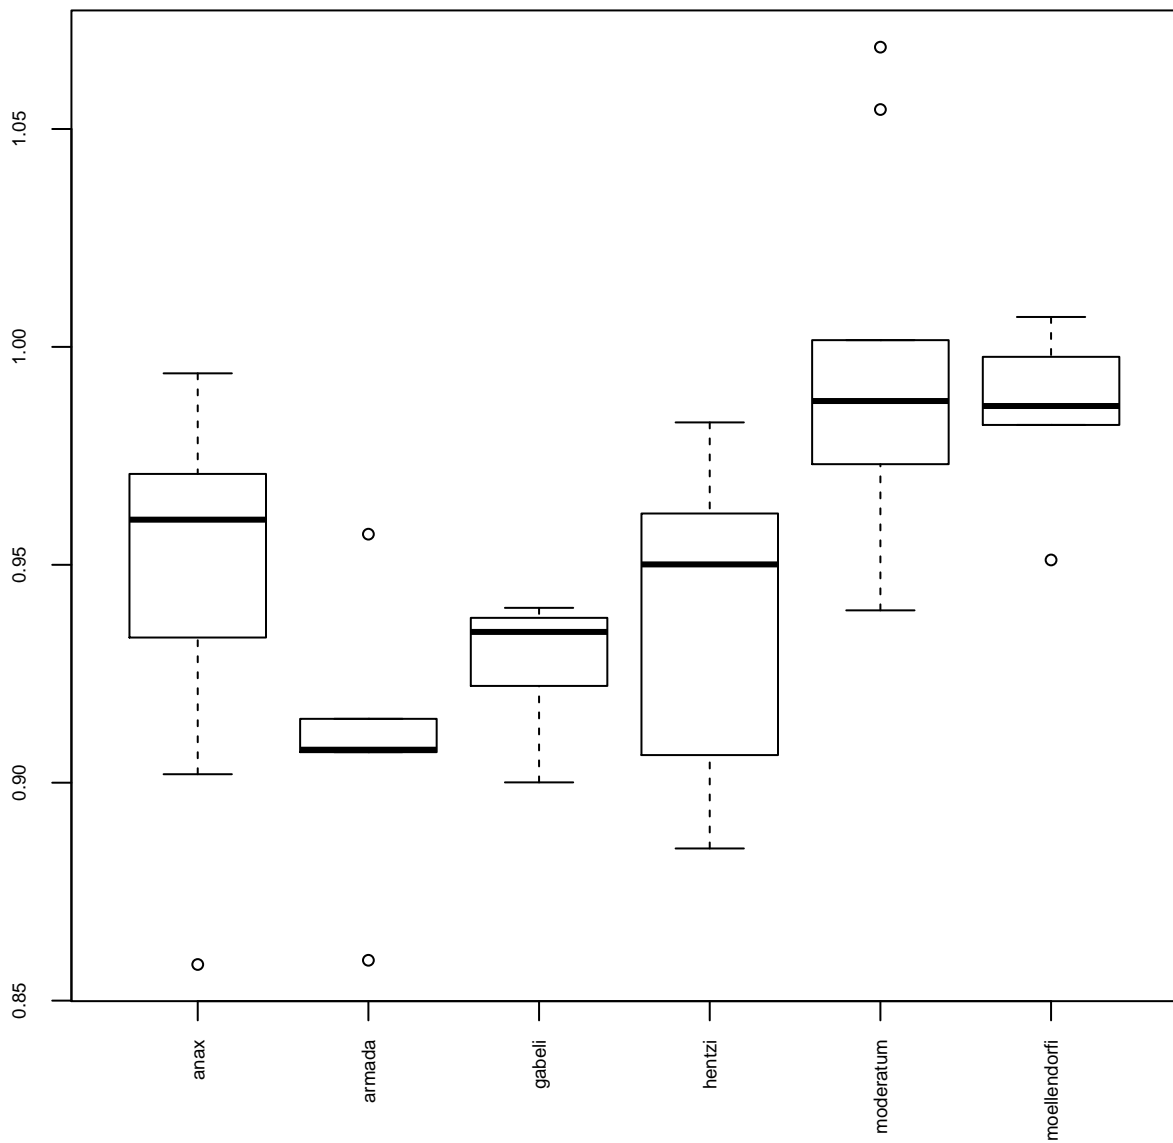

Supplement: Supplementary file 1341

## Metatarsus 3/Patella 4 Length ratio – females

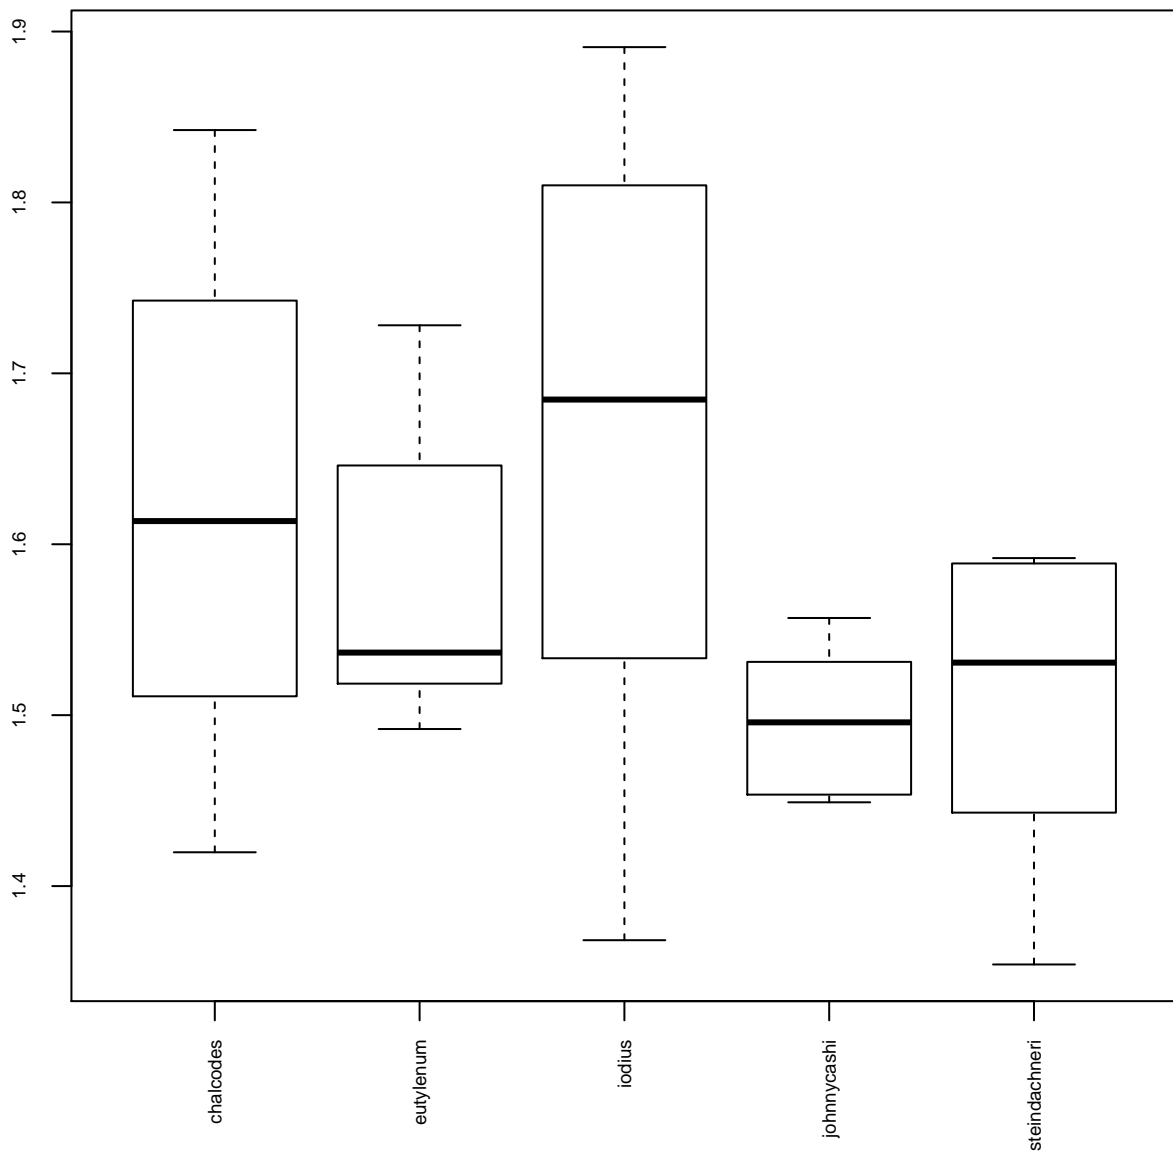

Supplement: Supplementary file 1342

## Metatarsus 1/Tarsus 1 ratio – females

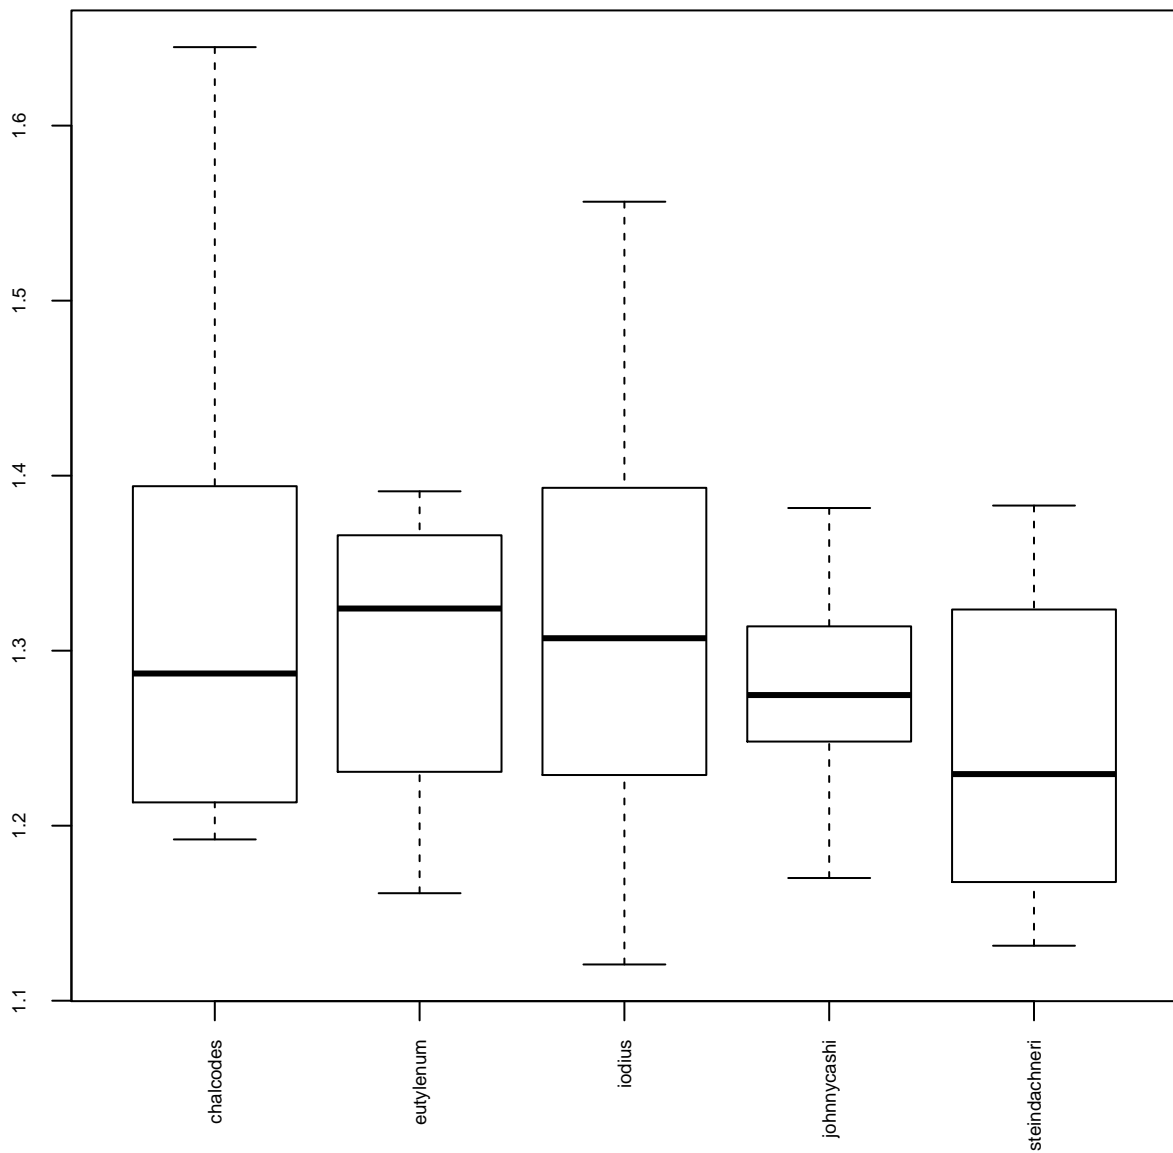

Supplement: Supplementary file 1343

## Femur 3/Metatarsus 4 Length ratio – males

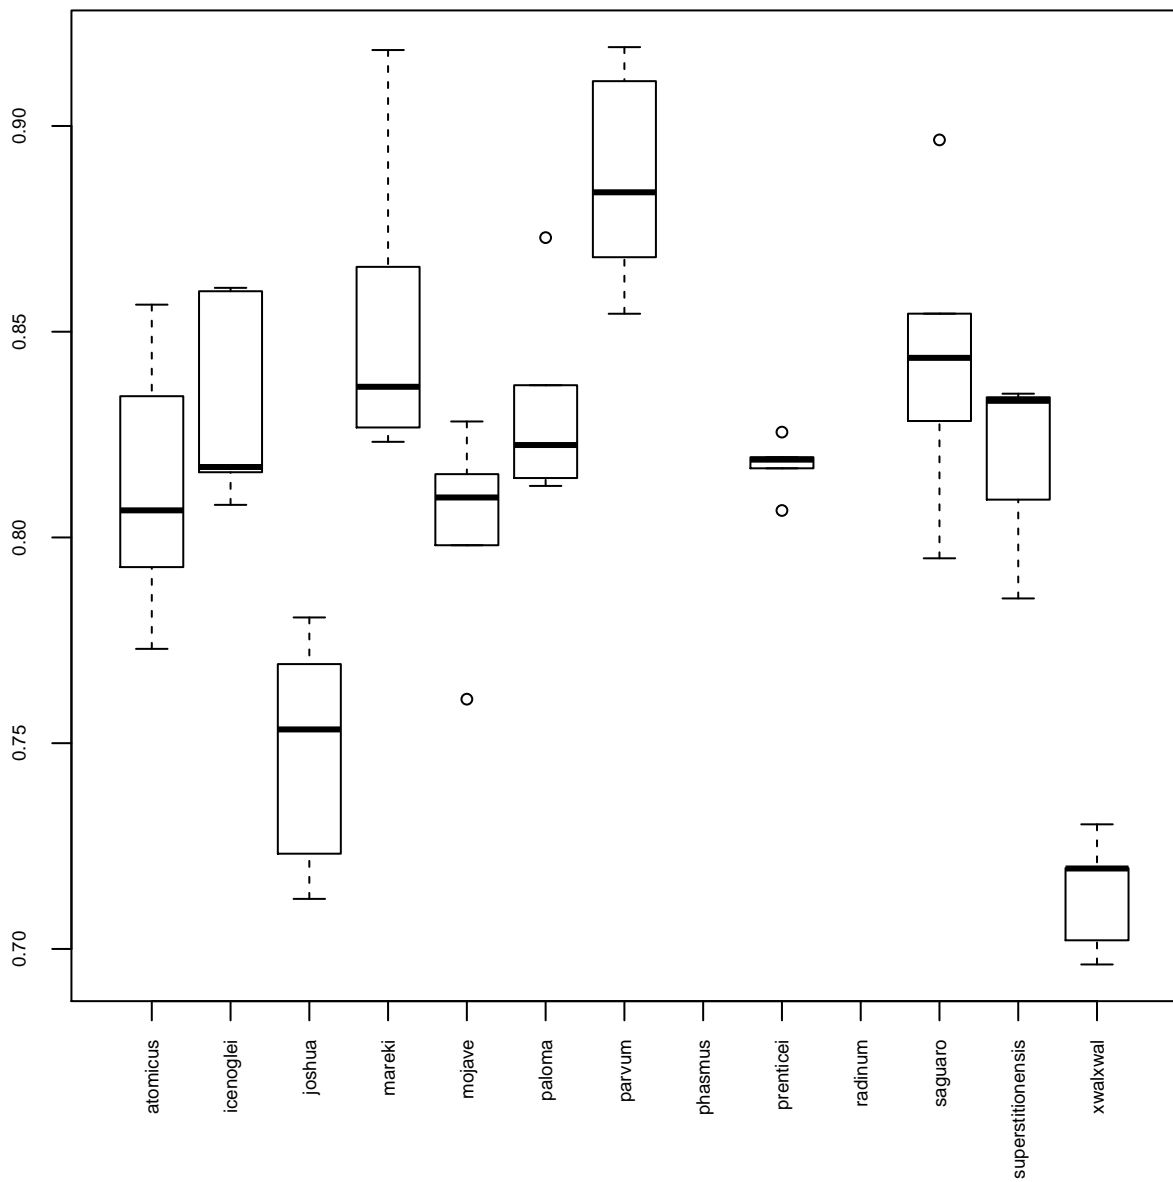

Supplement: Supplementary file 1344

# Femur 3/Tarsus 4 Length ratio – males

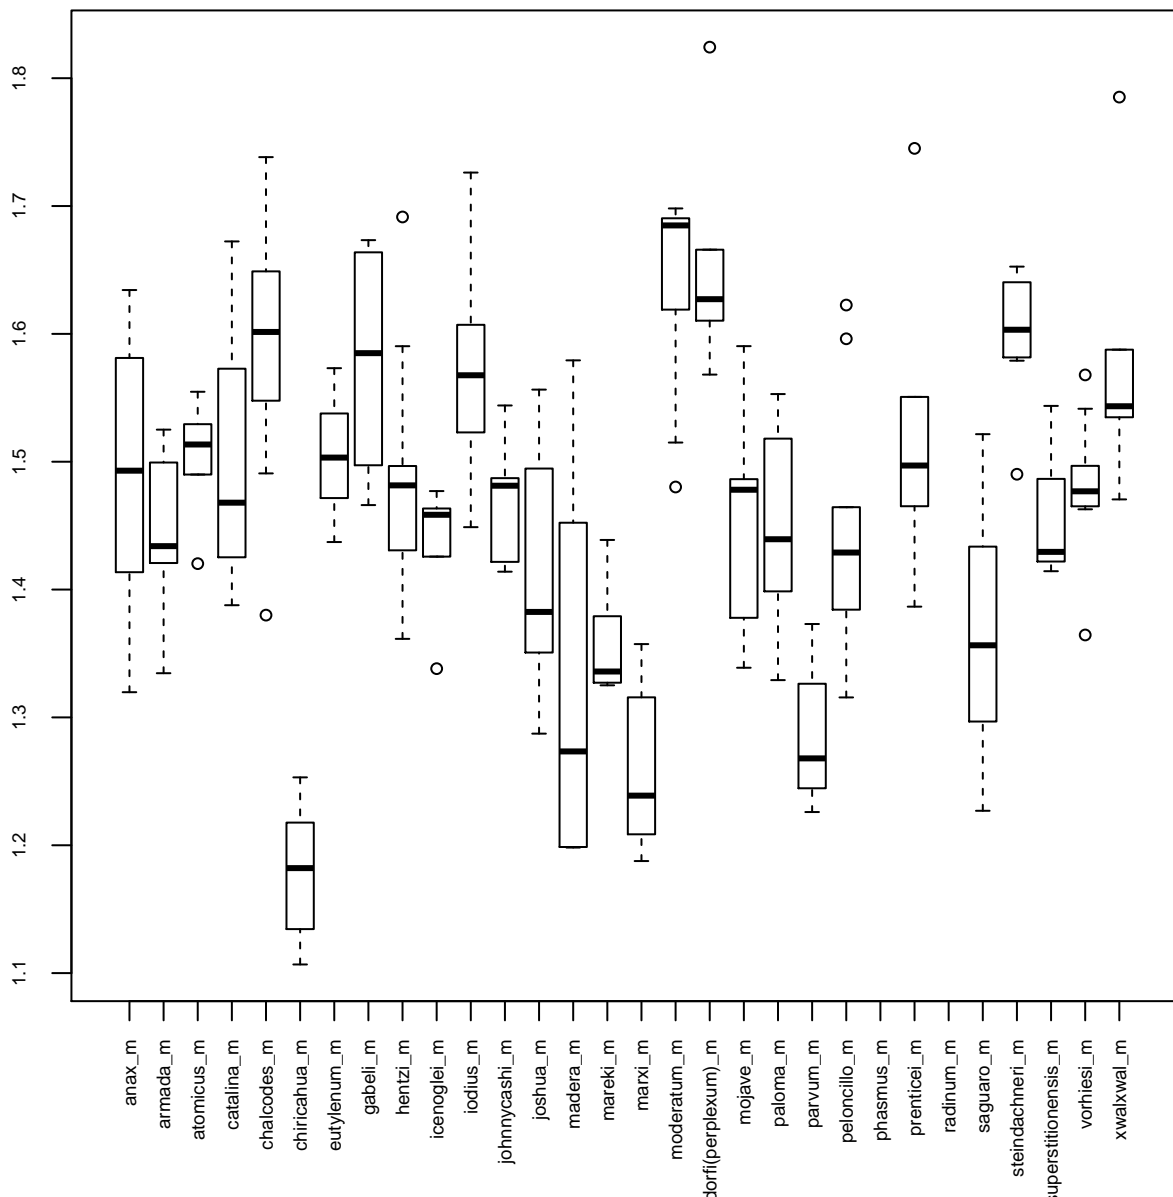

Supplement: Supplementary file 1345

## Carapace Length/Metatarsus 4 ratio – females

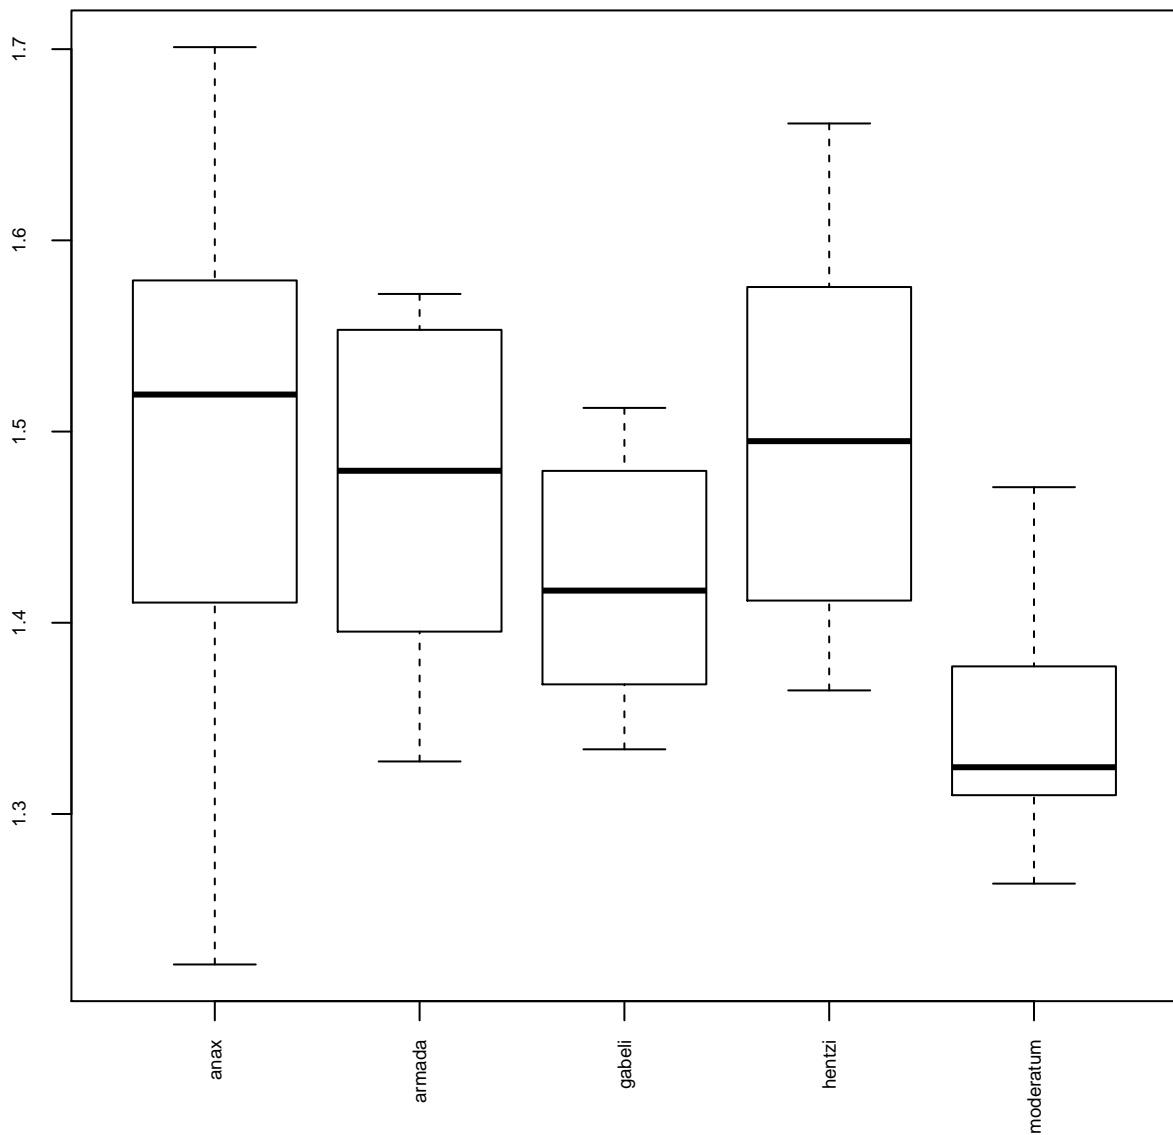

Supplement: Supplementary file 1346

## Tarsus 1/Femur 4 Length ratio – females

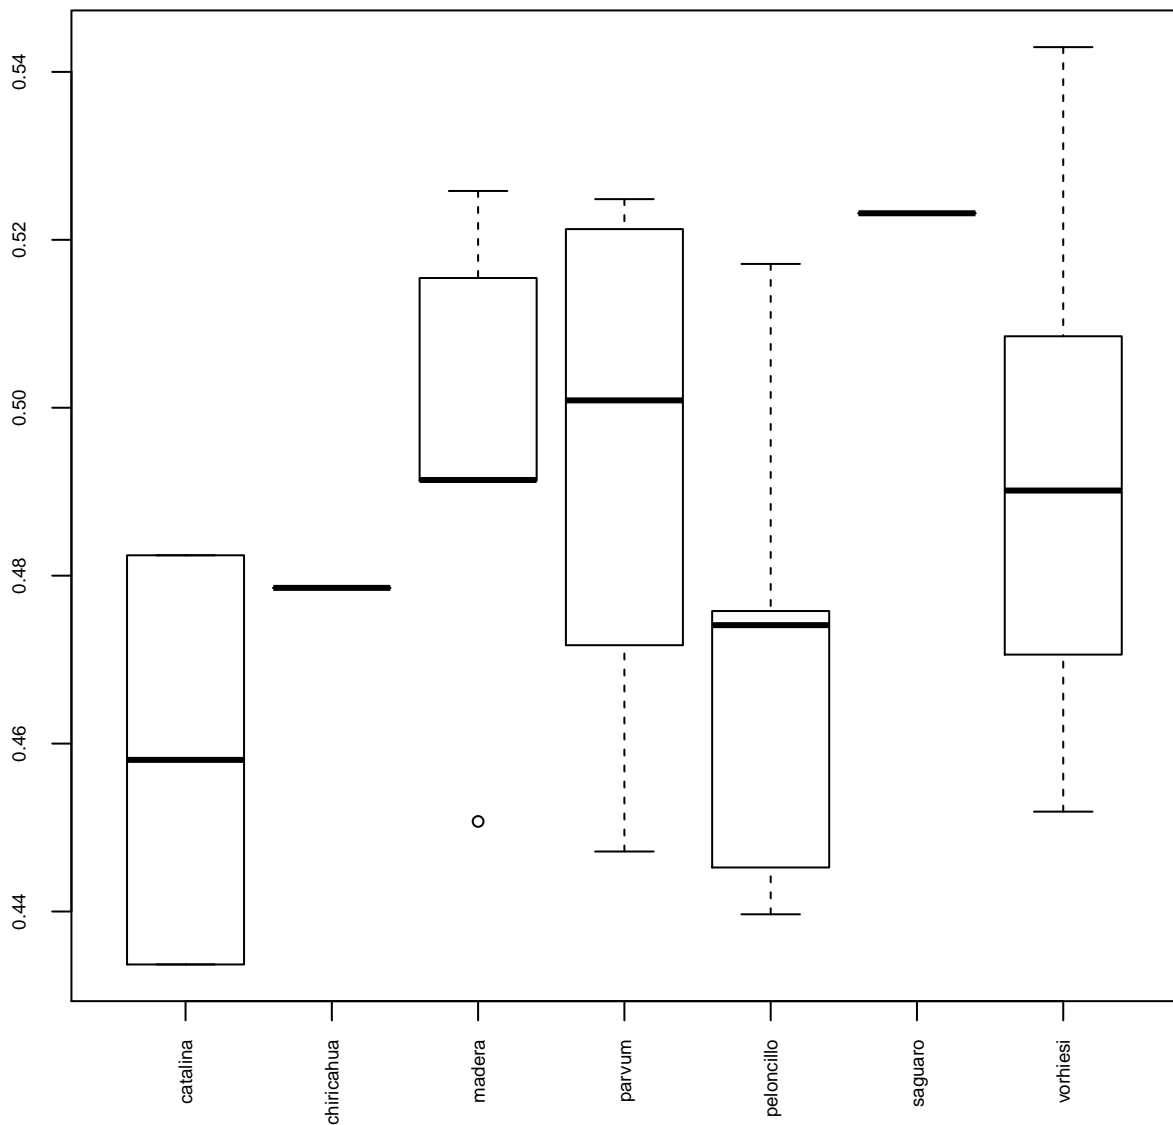

Supplement: Supplementary file 1347

# Patella 1/Metatarsus 4 Length ratio – females

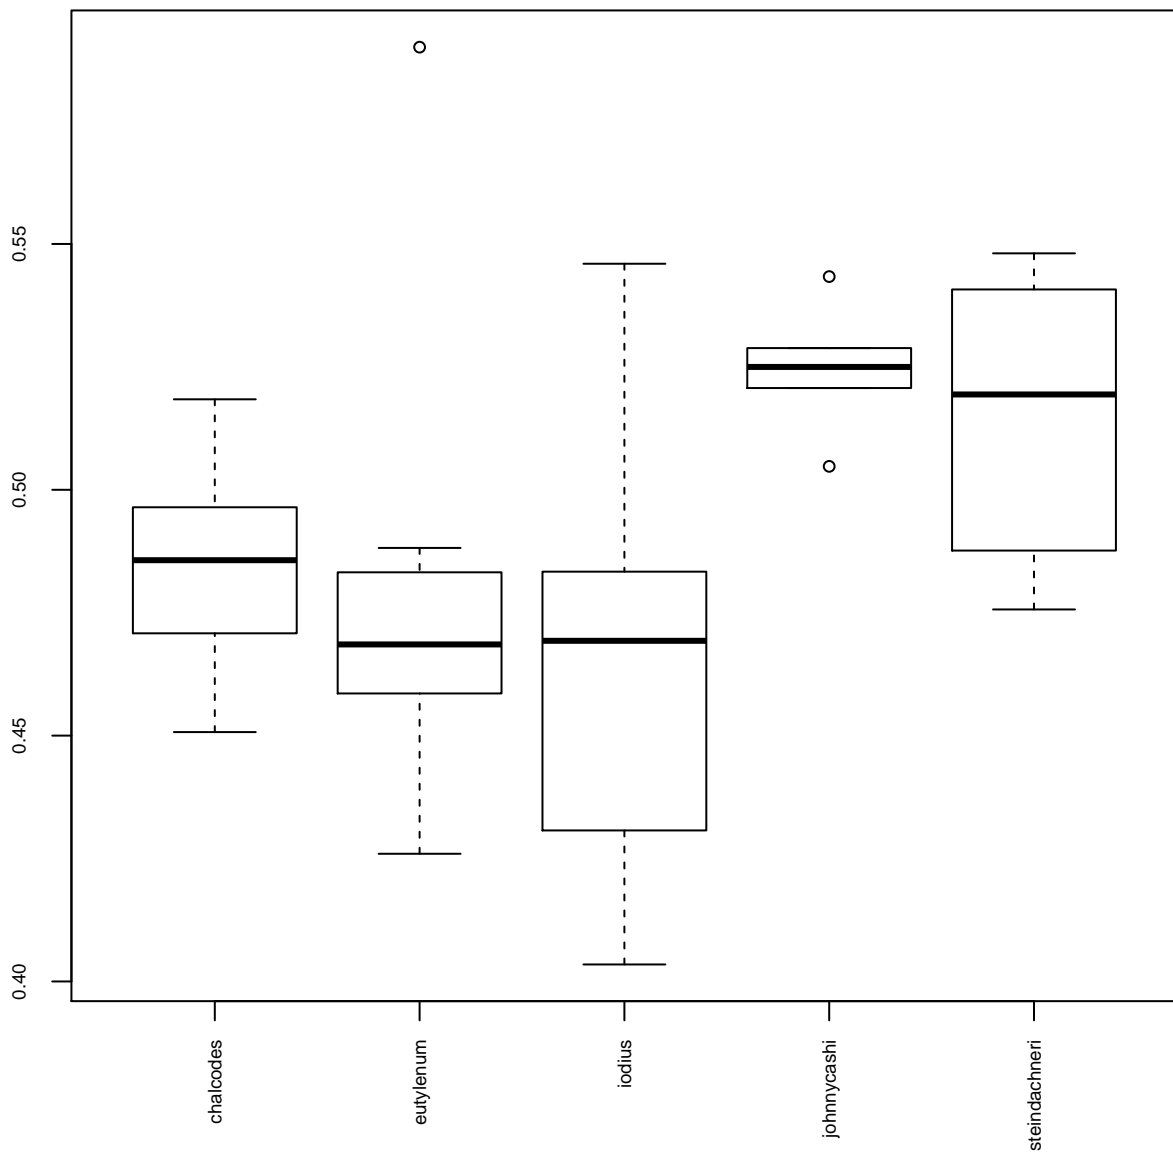

Supplement: Supplementary file 1348

## Metatarsus 1/Tarsus 1 ratio – males

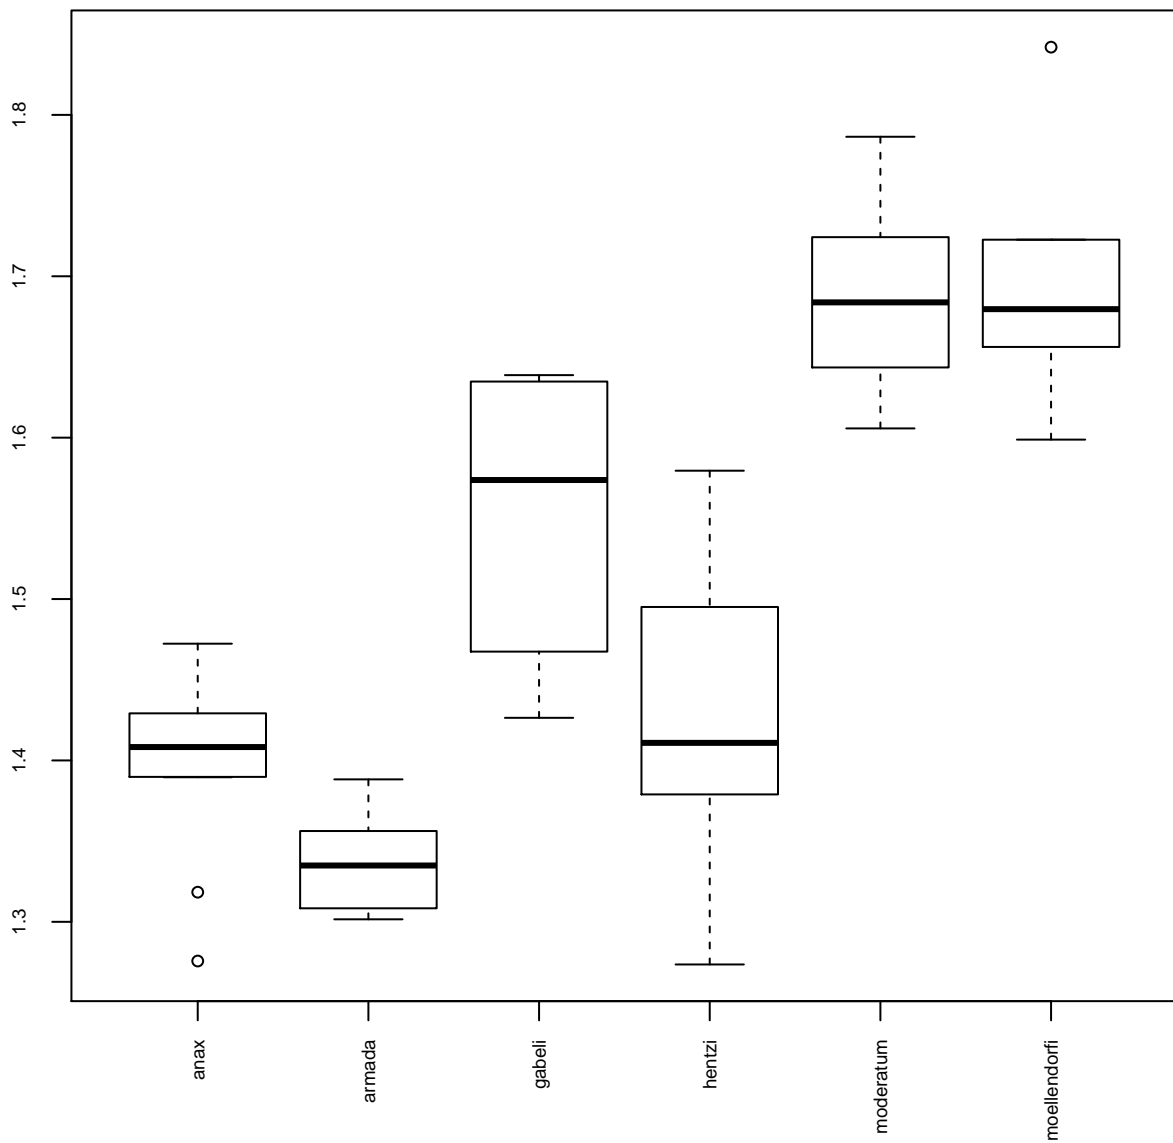

Supplement: Supplementary file 1349

# Femur 1/Tarsus 1 ratio – females

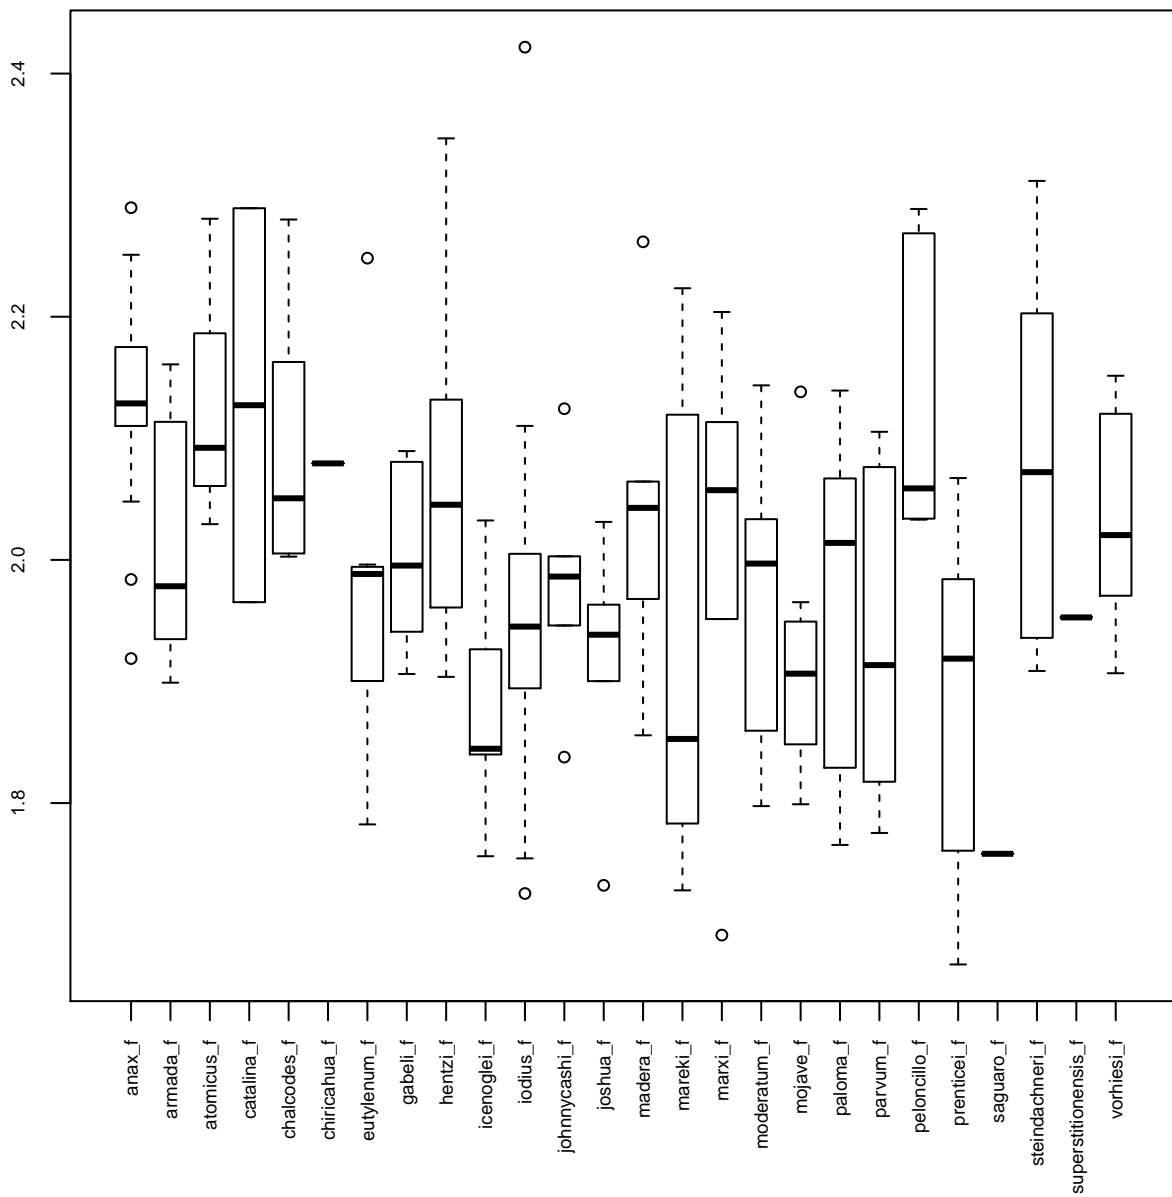

Supplement: Supplementary file 1350

## Tibia 3/Tarsus 4 Length ratio – females

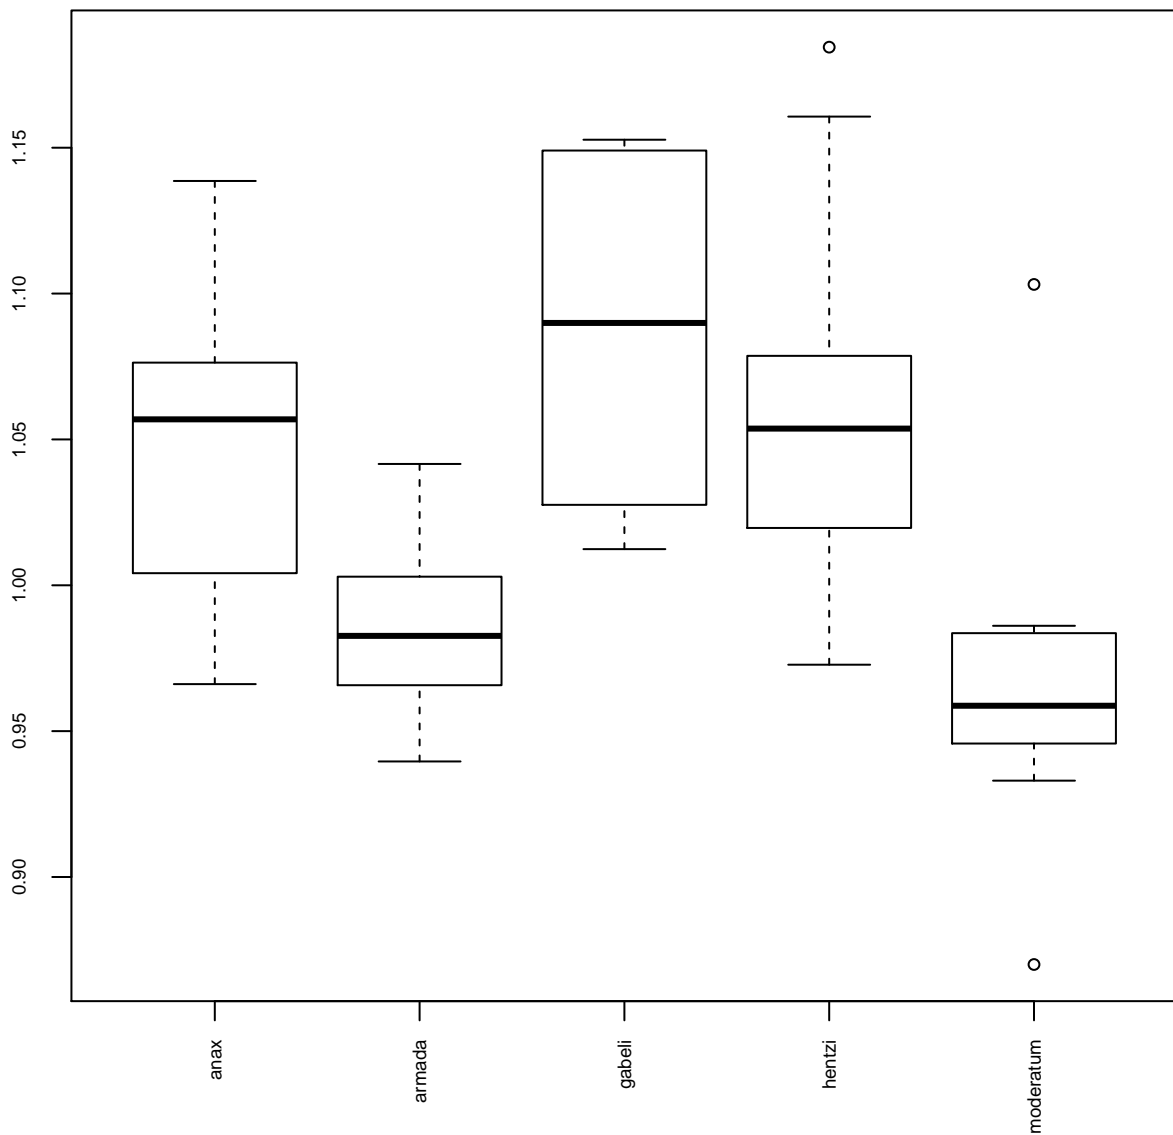

Supplement: Supplementary file 1351

## Femur 4 Length/Width ratio – males

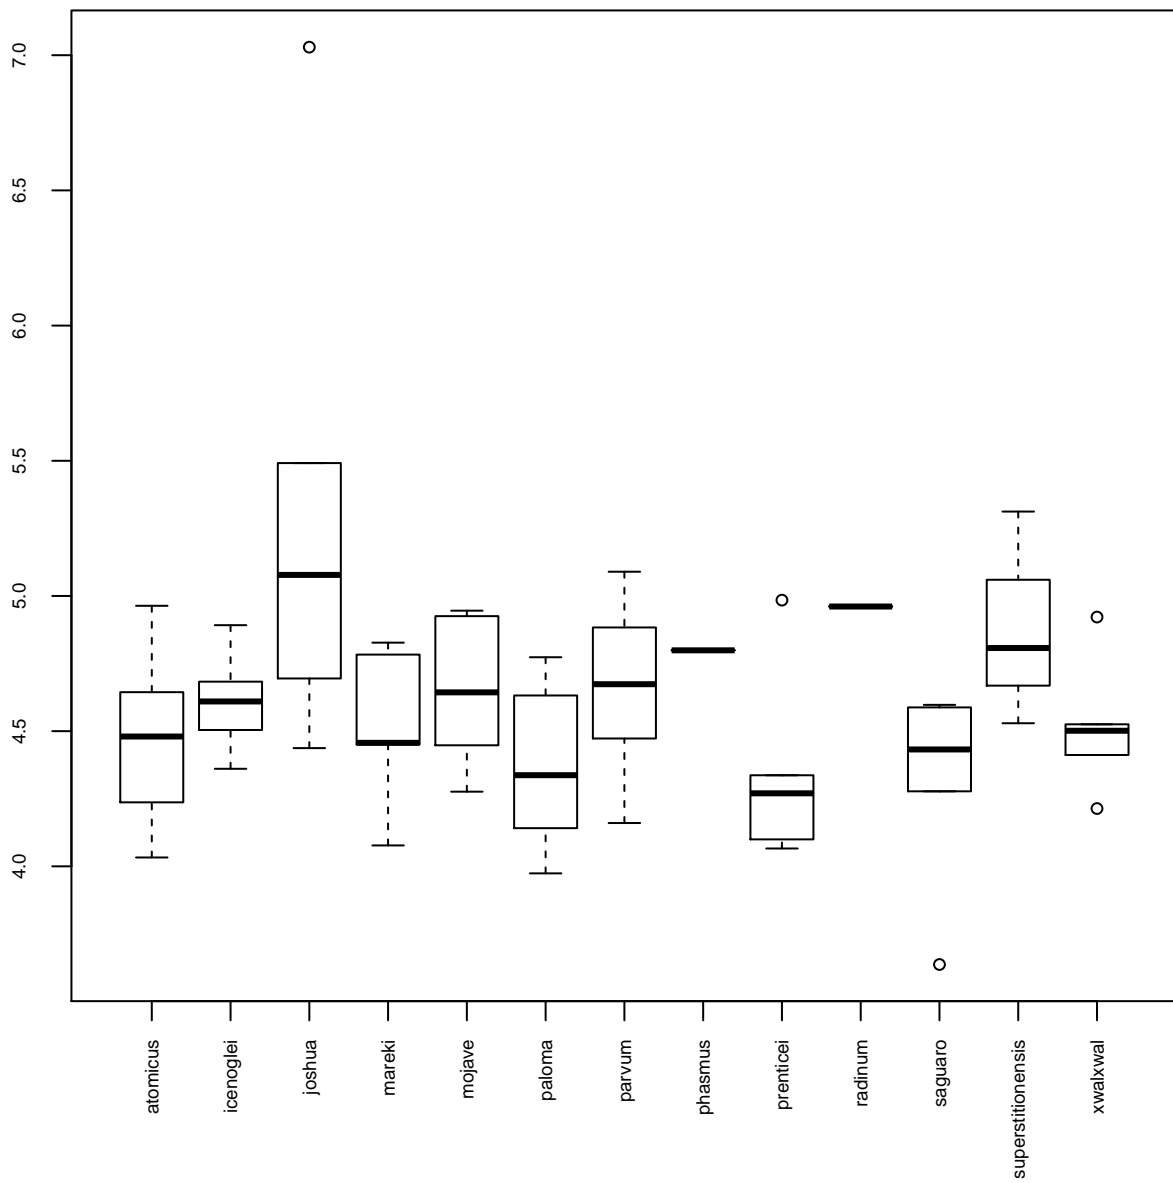

Supplement: Supplementary file 1352

# Tibia 1/Metatarsus 4 Length ratio – males

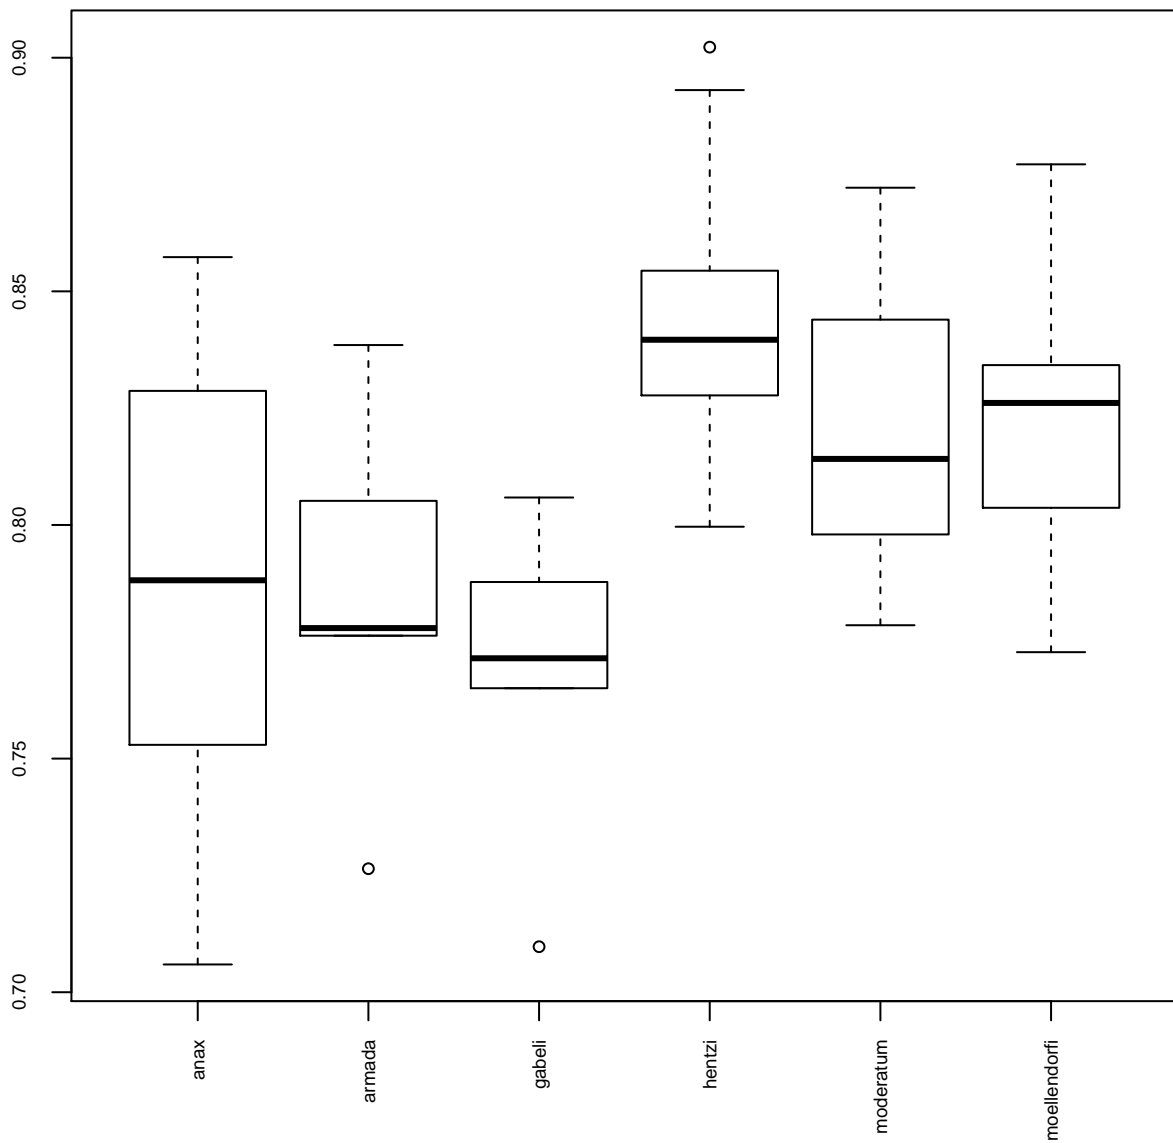

Supplement: Supplementary file 1353

## Tibia 1/Patella 3 Length ratio – females

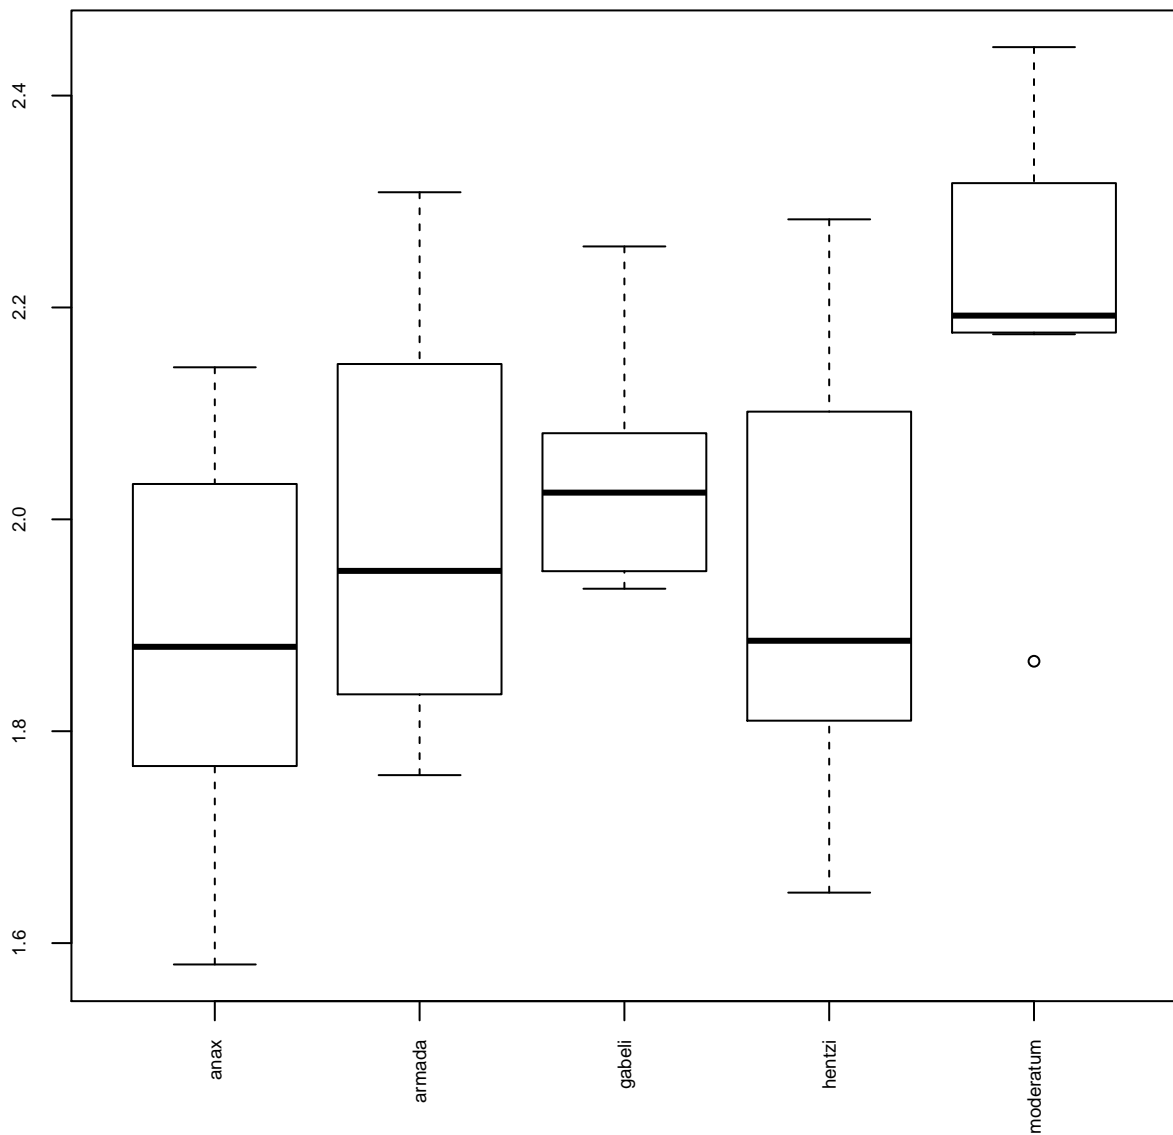

Supplement: Supplementary file 1354

## Femur 1/Tarsus 4 ratio – males

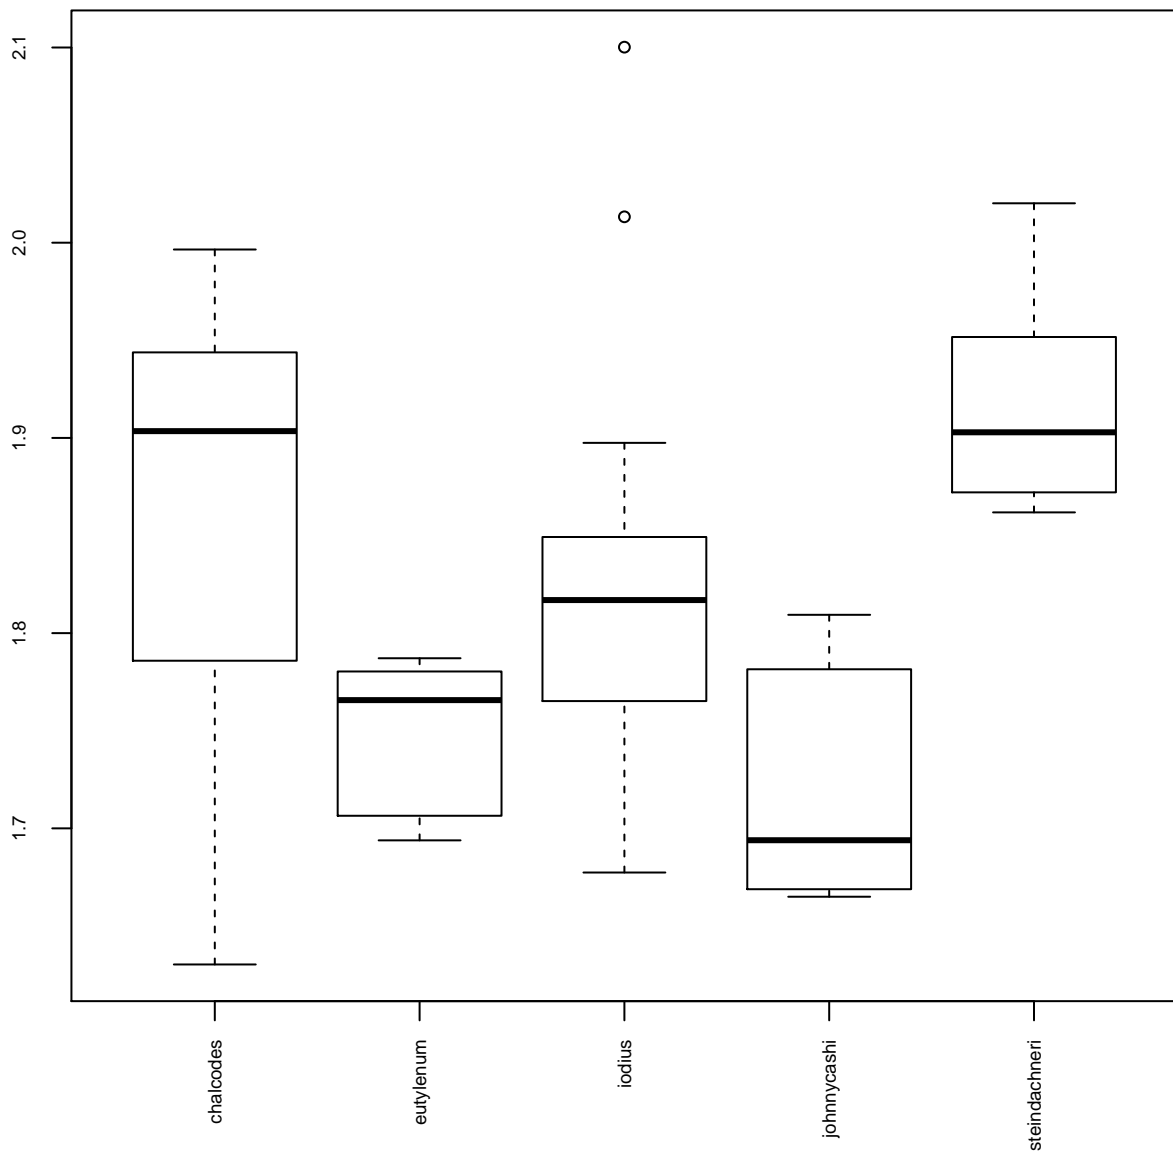

Supplement: Supplementary file 1355

## Femur 3/Tarsus 4 Length ratio – females

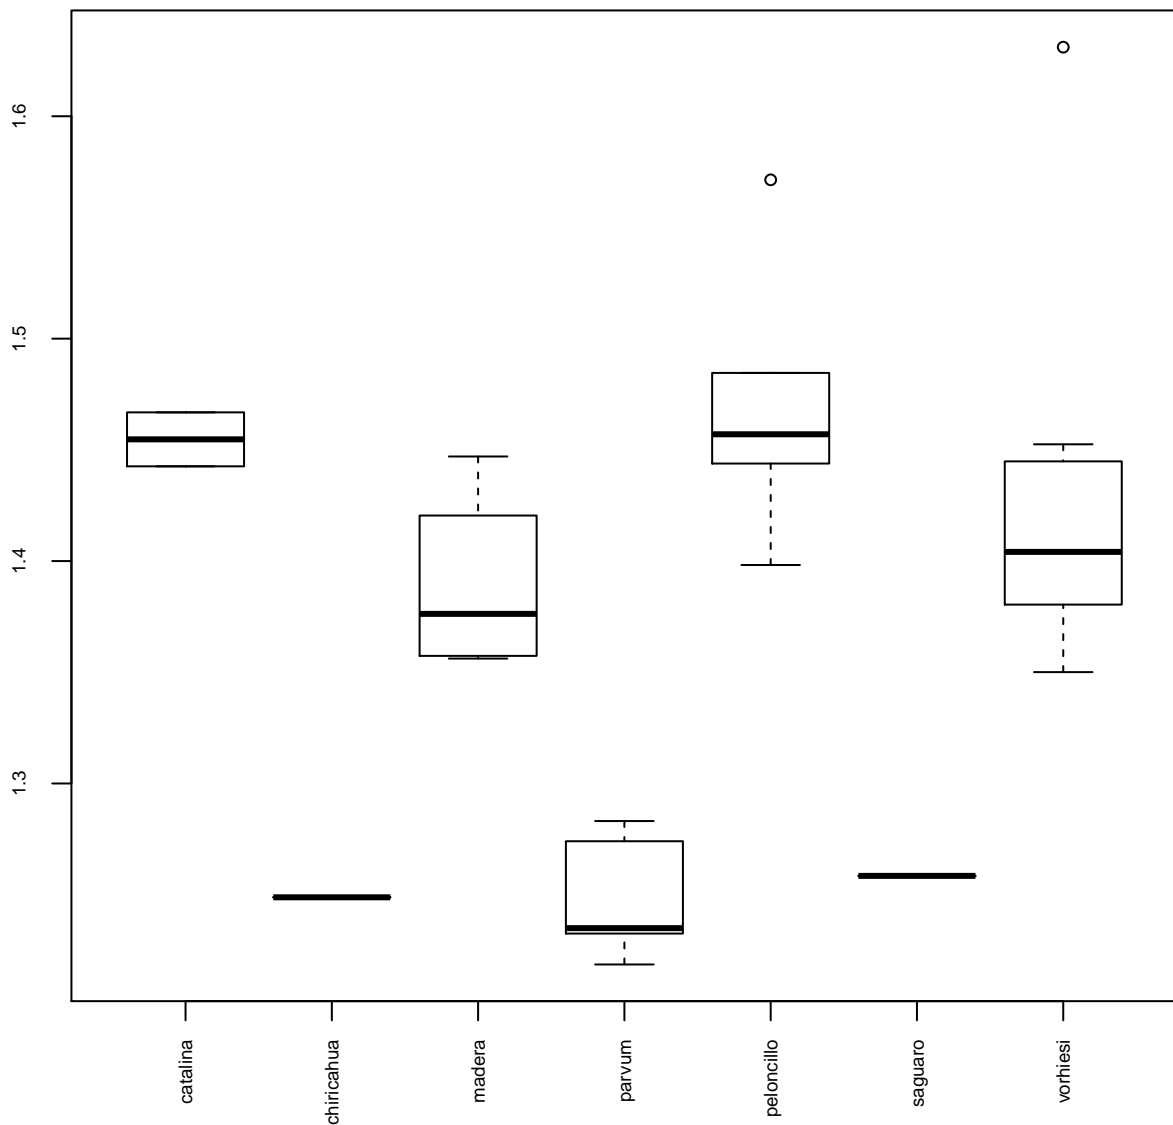

Supplement: Supplementary file 1356

## Metatarsus 3/Patella 4 Length ratio – females

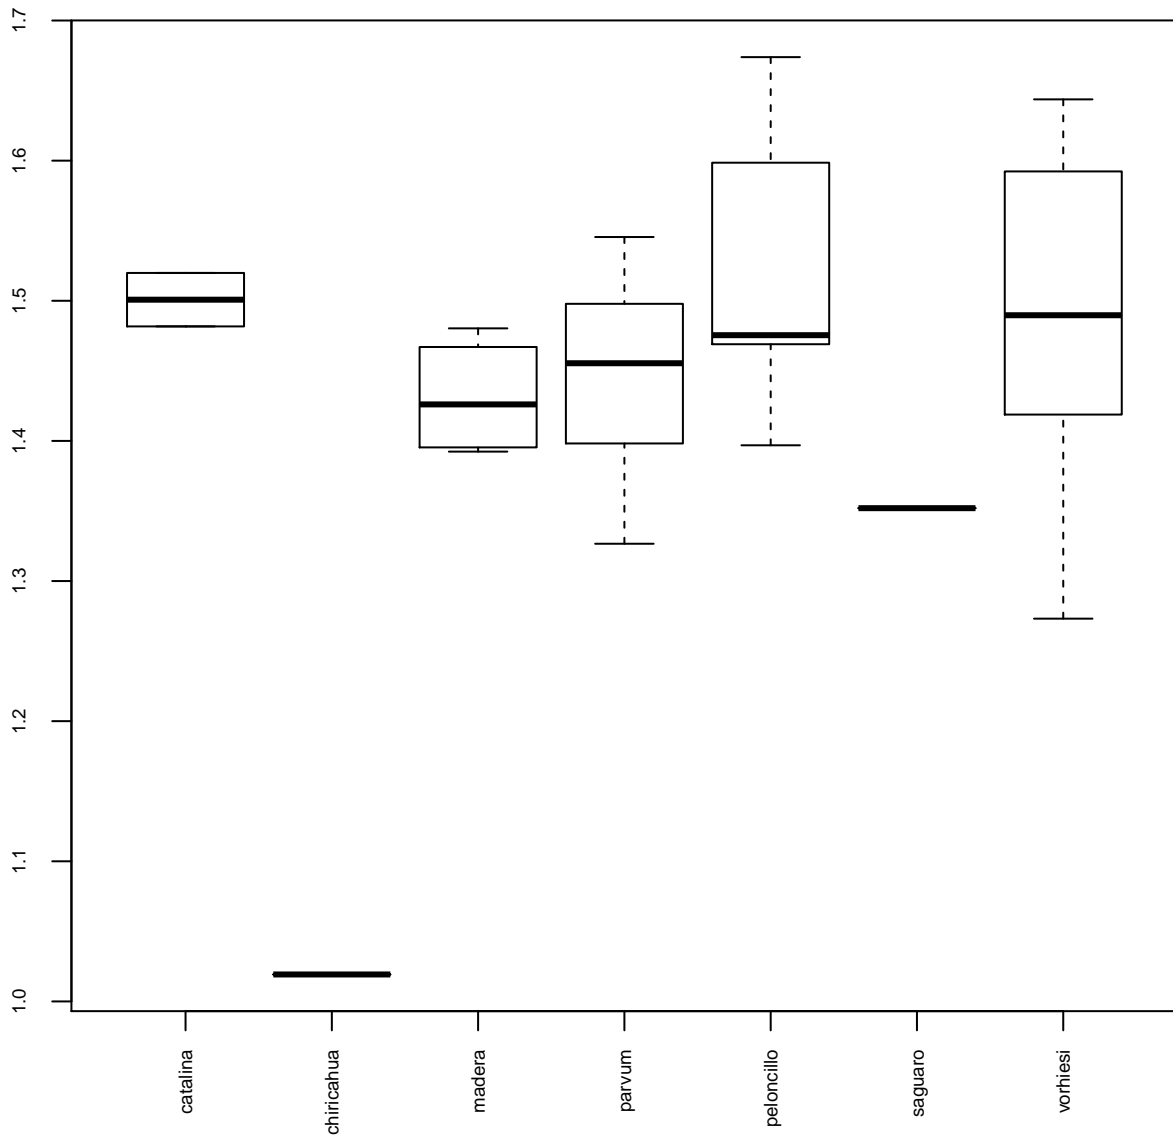

Supplement: Supplementary file 1357

## Tarsus 1/Tarsus 3 ratio – males

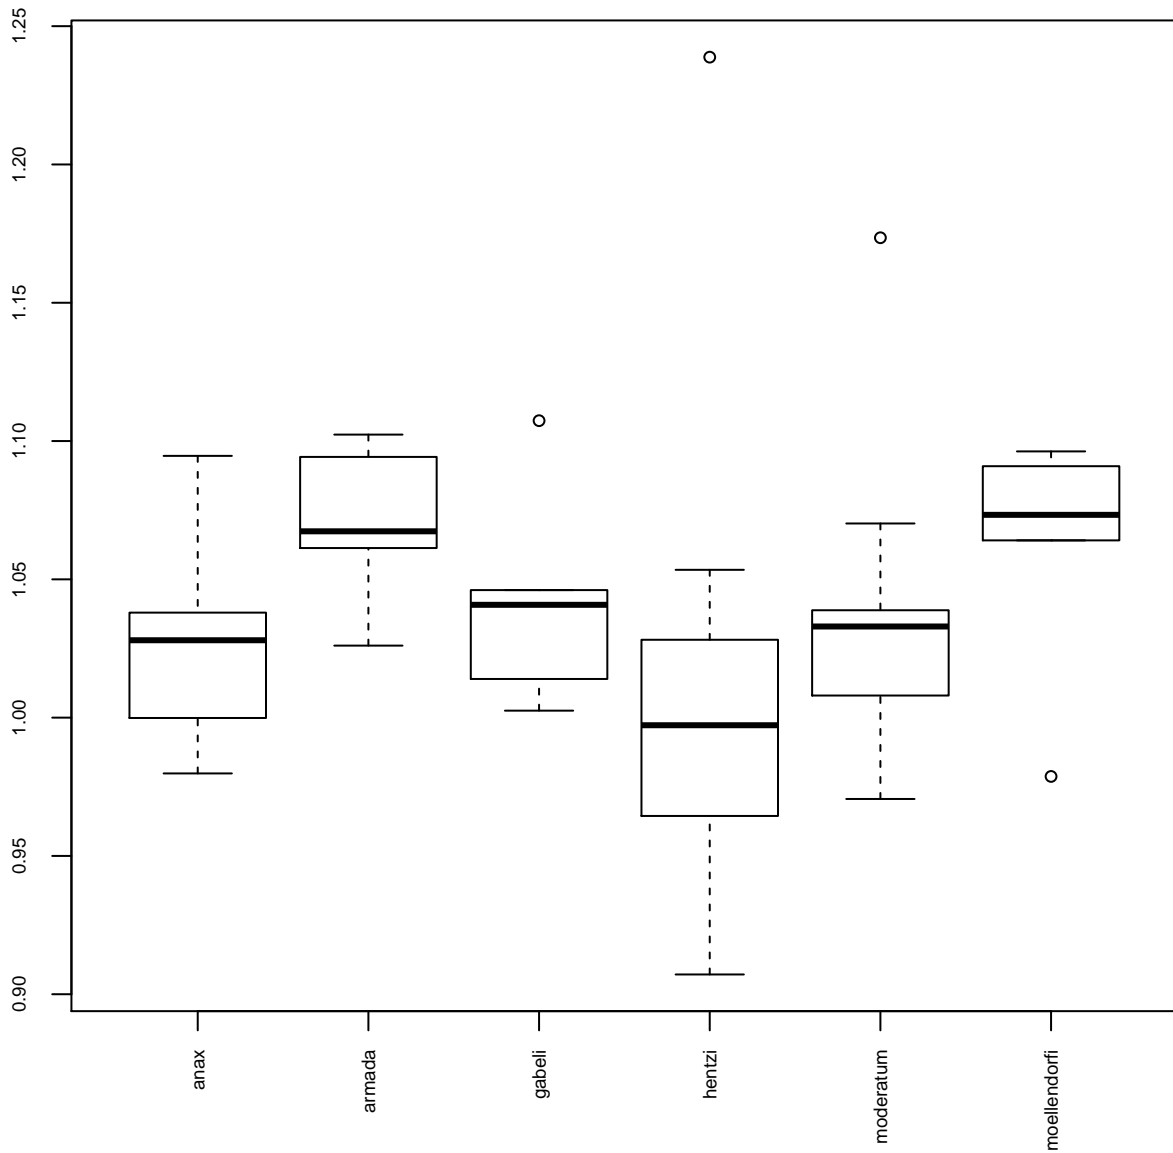

Supplement: Supplementary file 1358

## Metatarsus 3/Tarsus 3 ratio – males

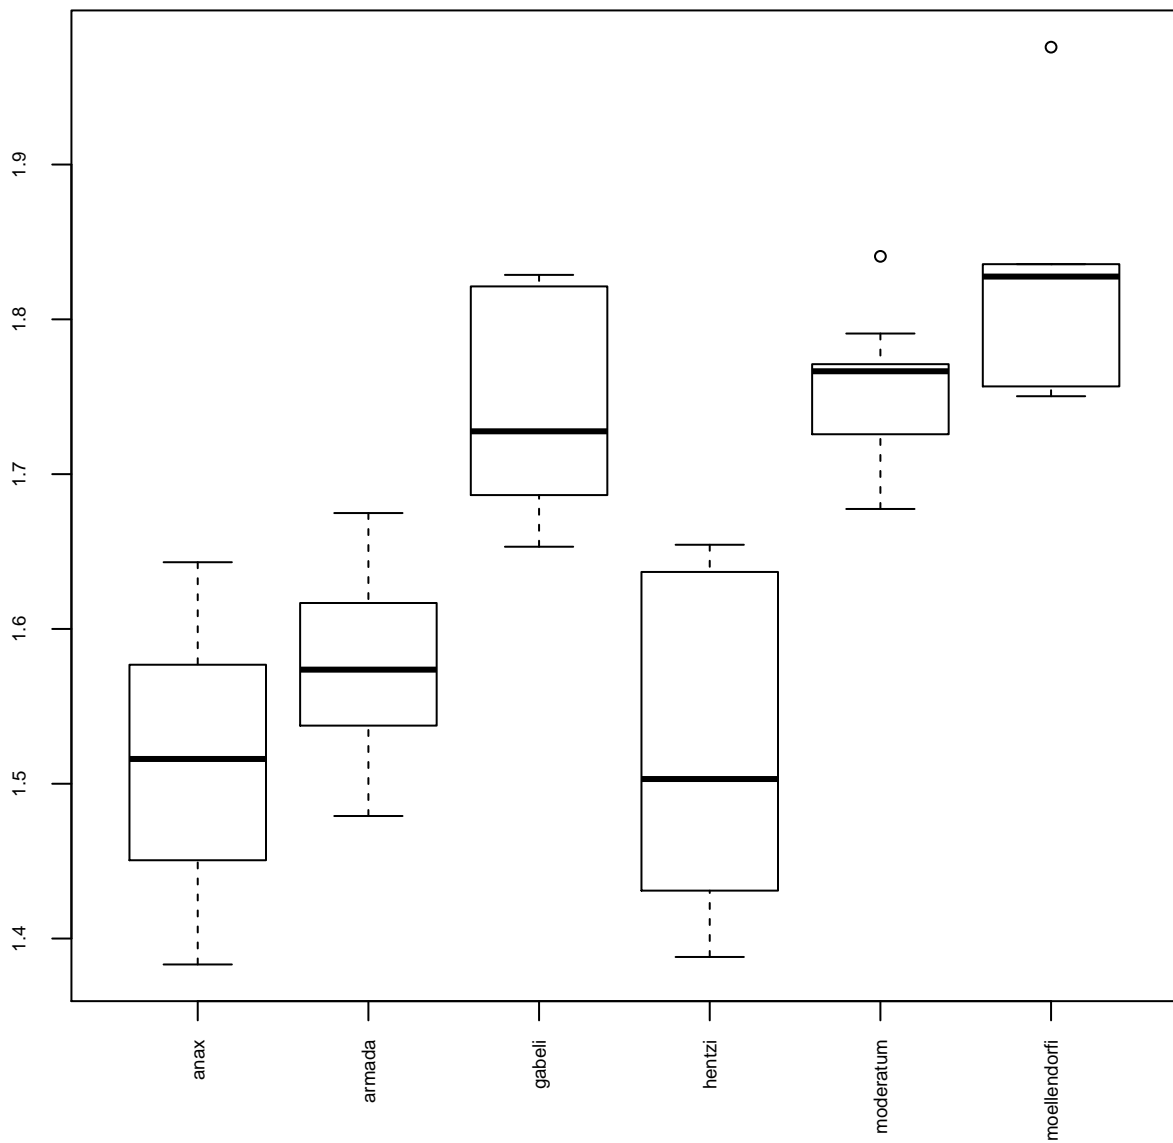

Supplement: Supplementary file 1359

## Carapace Length – females

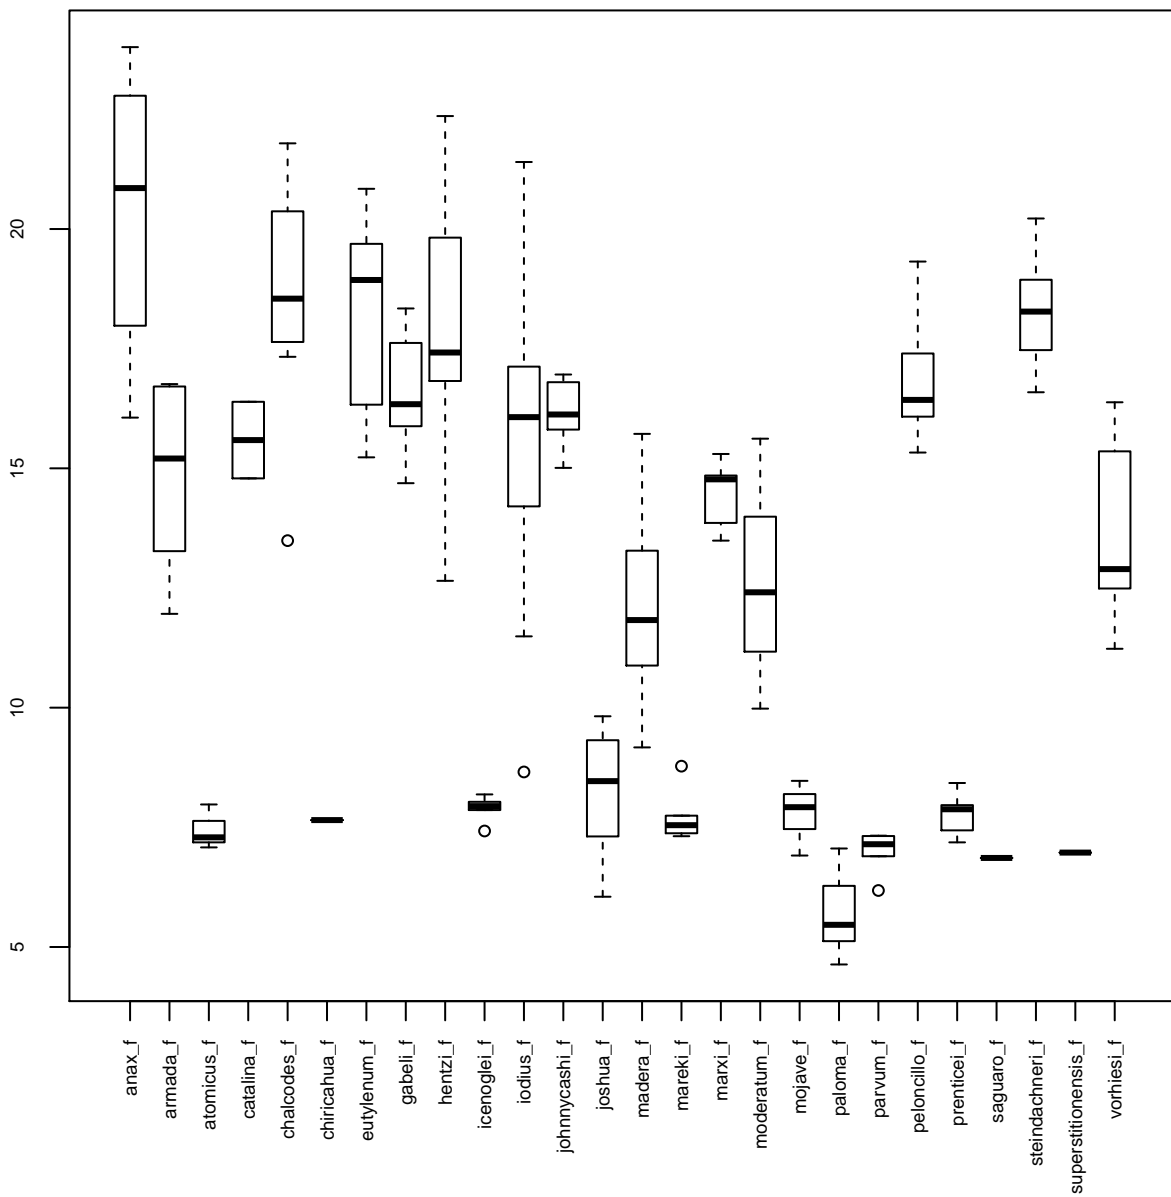

Supplement: Supplementary file 1360

## Femur 1/Tibia 4 ratio – males

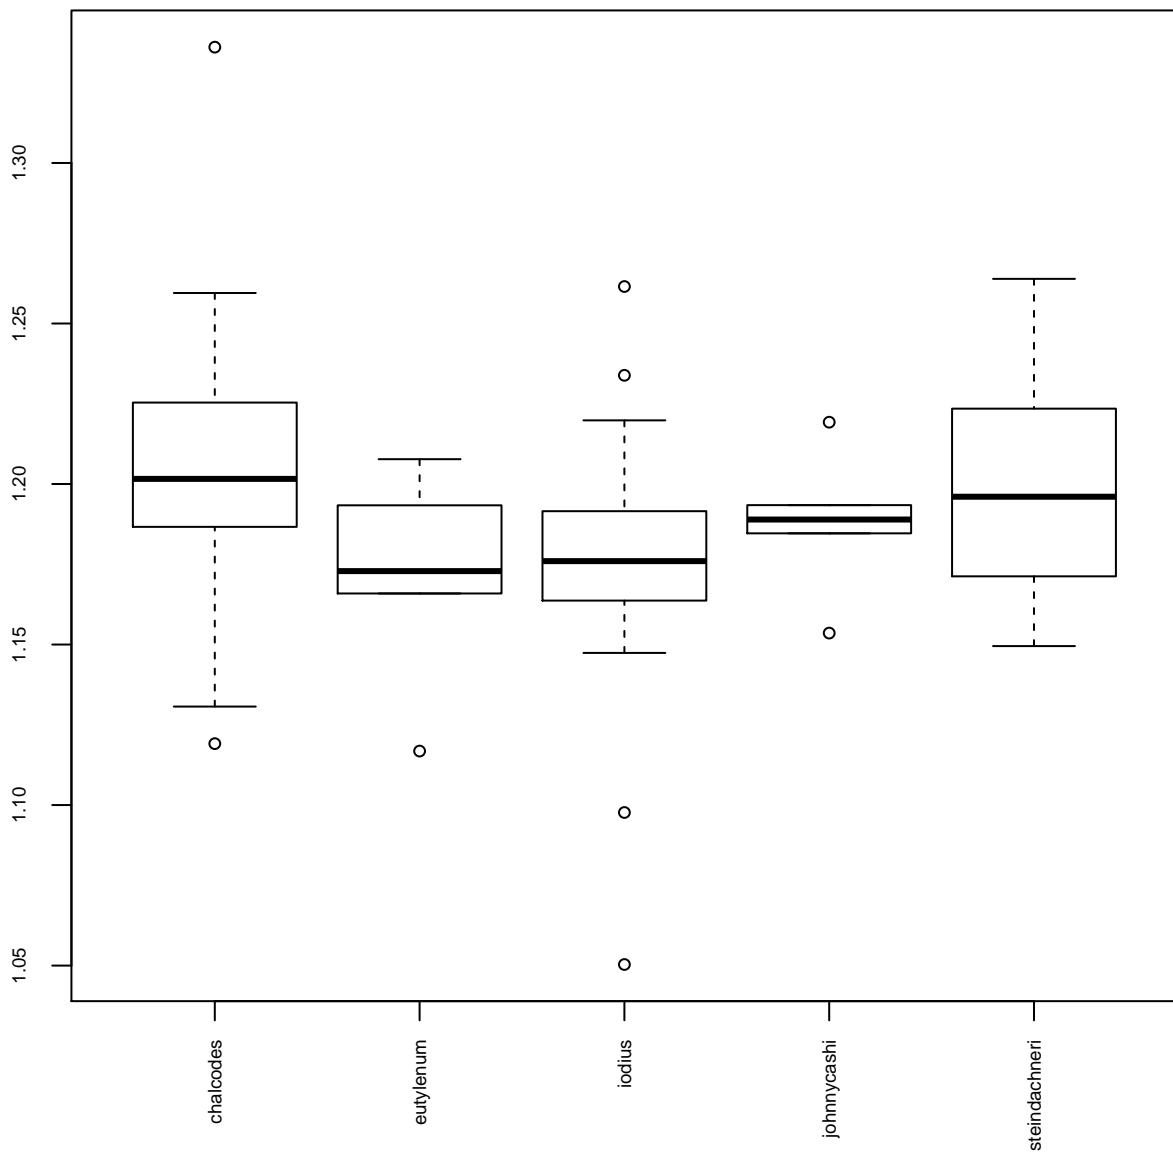

Supplement: Supplementary file 1361

## Femur 1/Patella 4 ratio – males

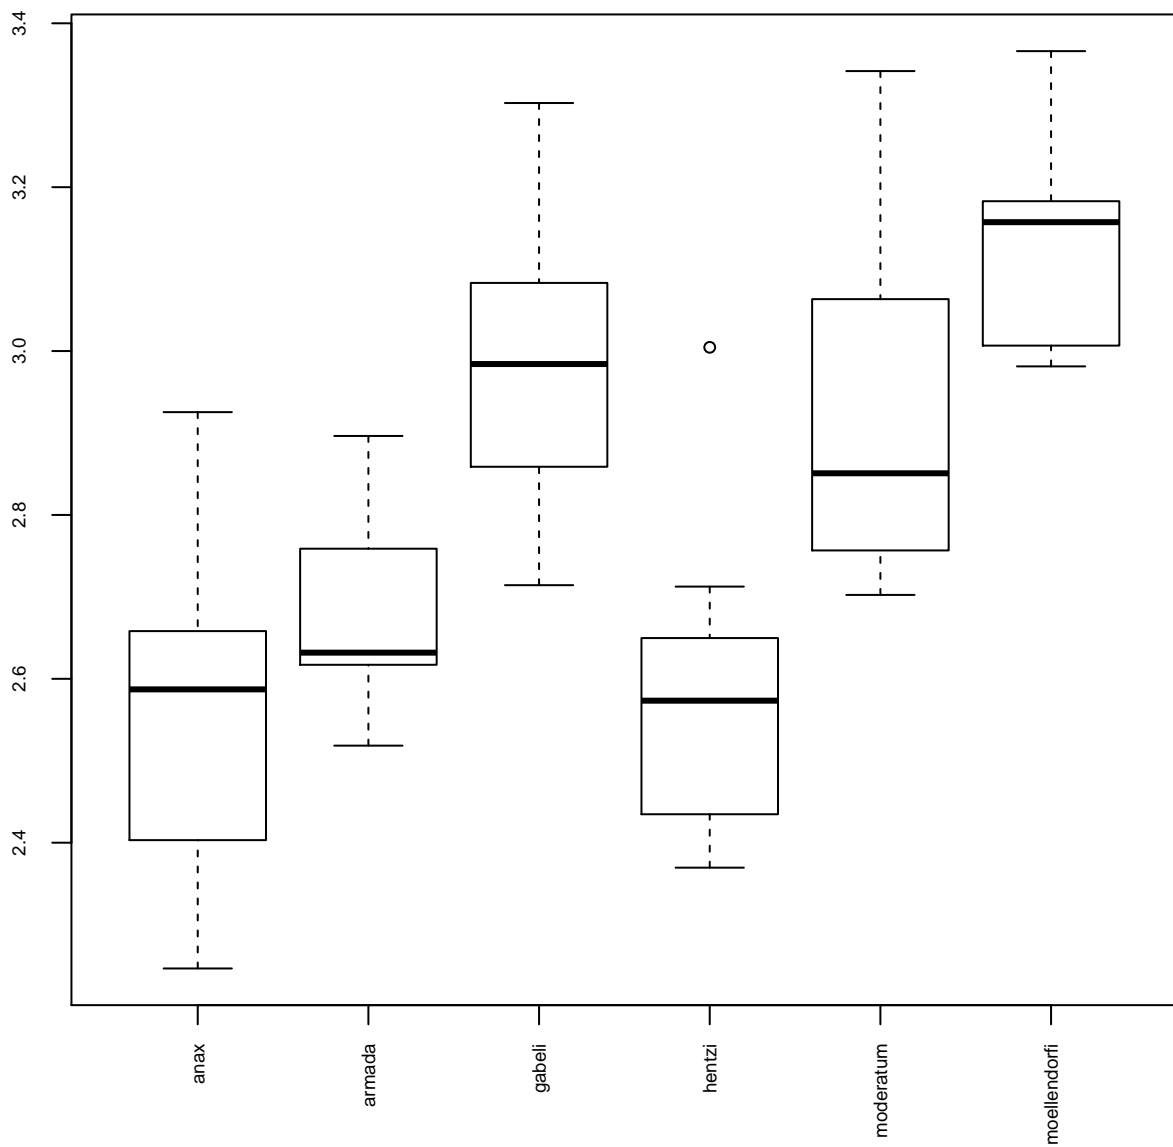

Supplement: Supplementary file 1362

# Patella 1/Metatarsus 3 Length ratio – females

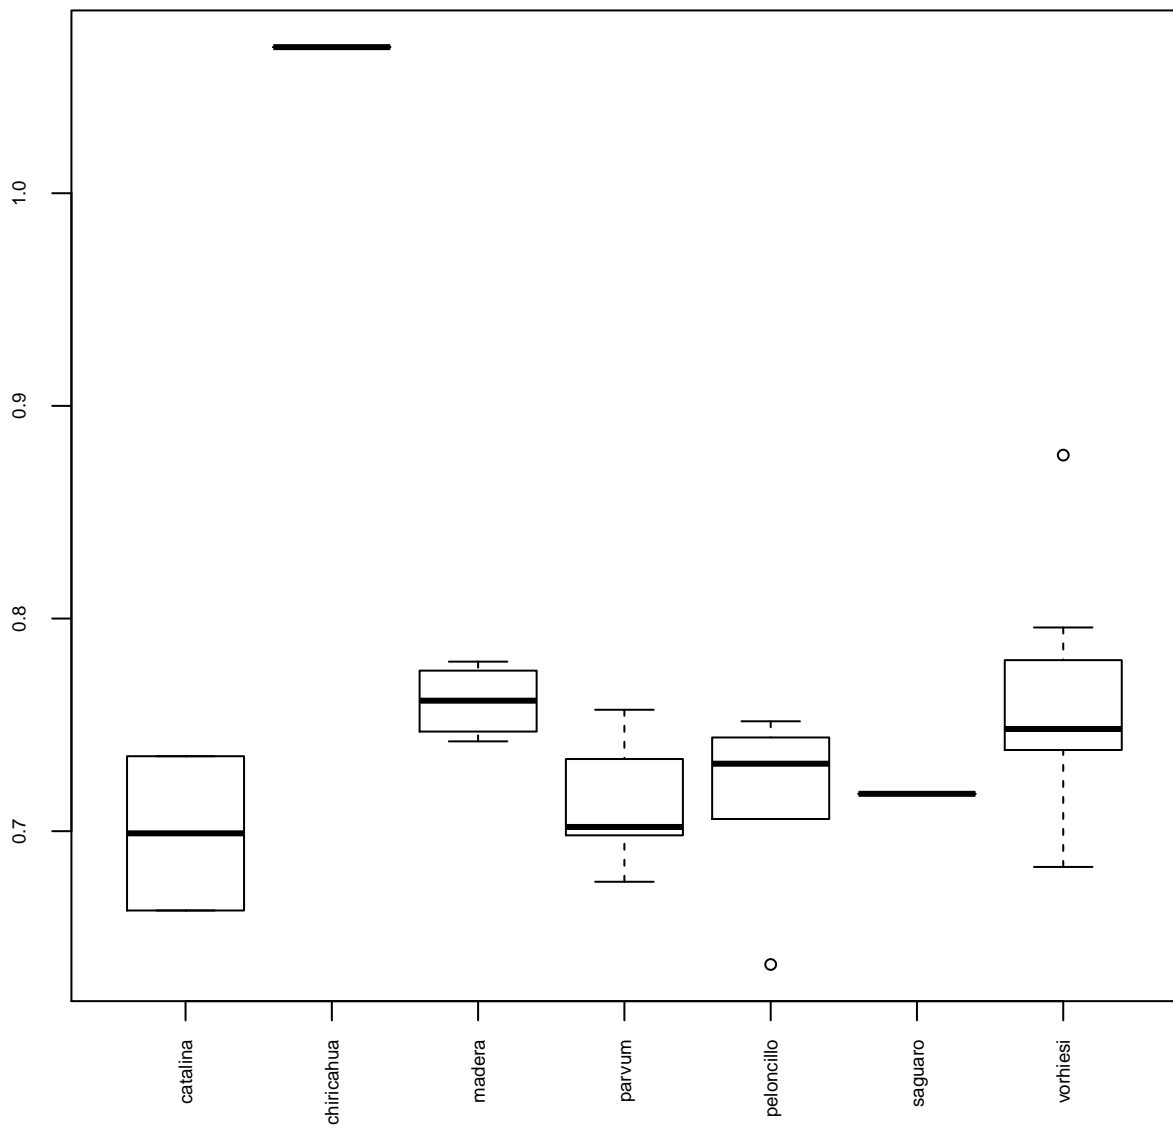

Supplement: Supplementary file 1363

## Femur 1/Metatarsus 4 ratio – males

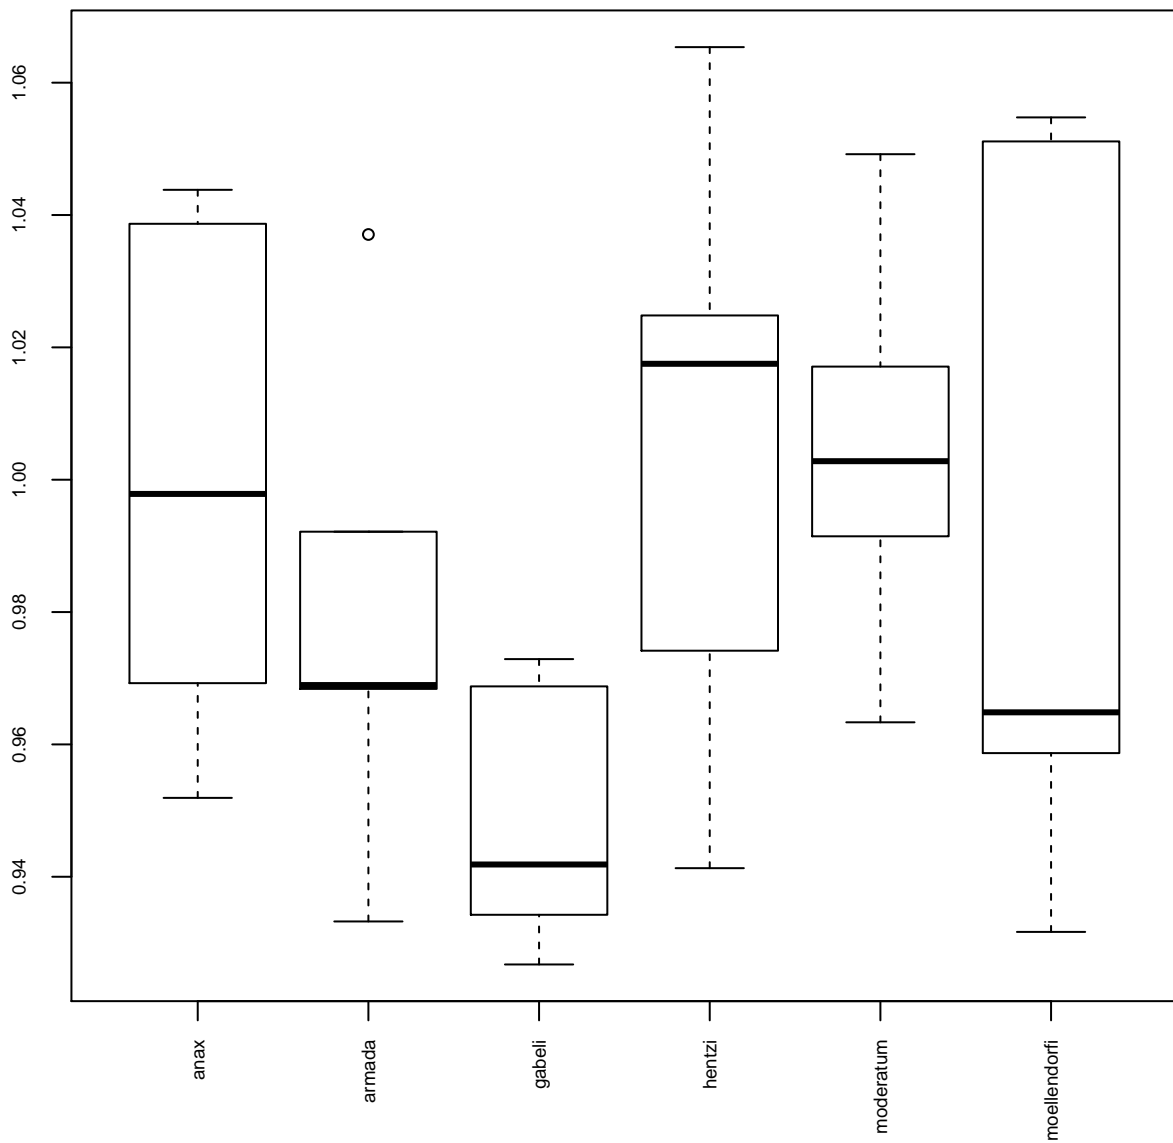

Supplement: Supplementary file 1364

## Tibia 3/Patella 4 Length ratio – females

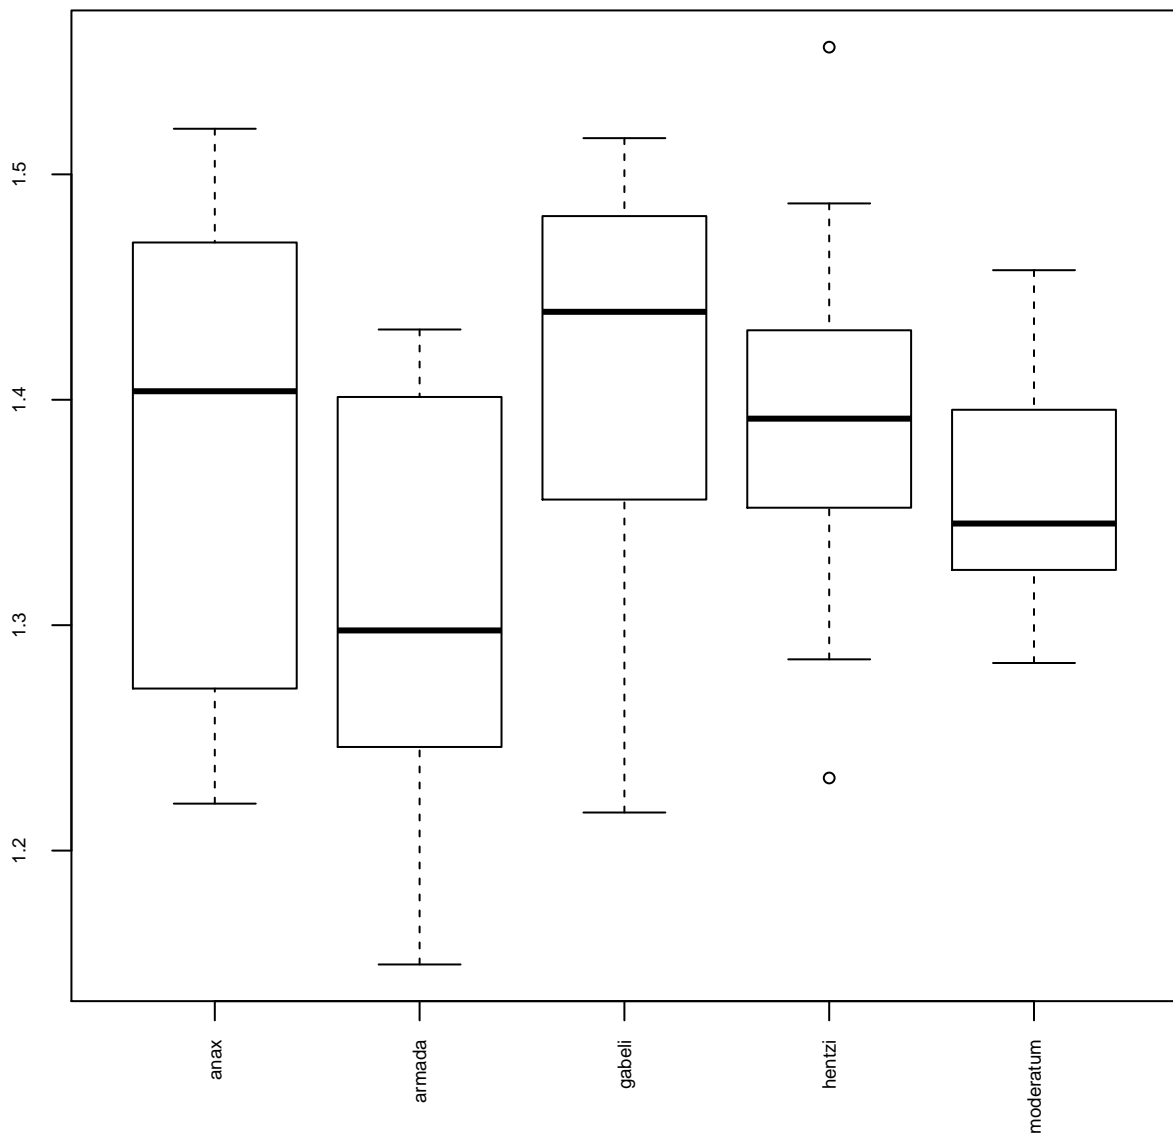

Supplement: Supplementary file 1365

## Carapace Length/Tibia 4 ratio – females

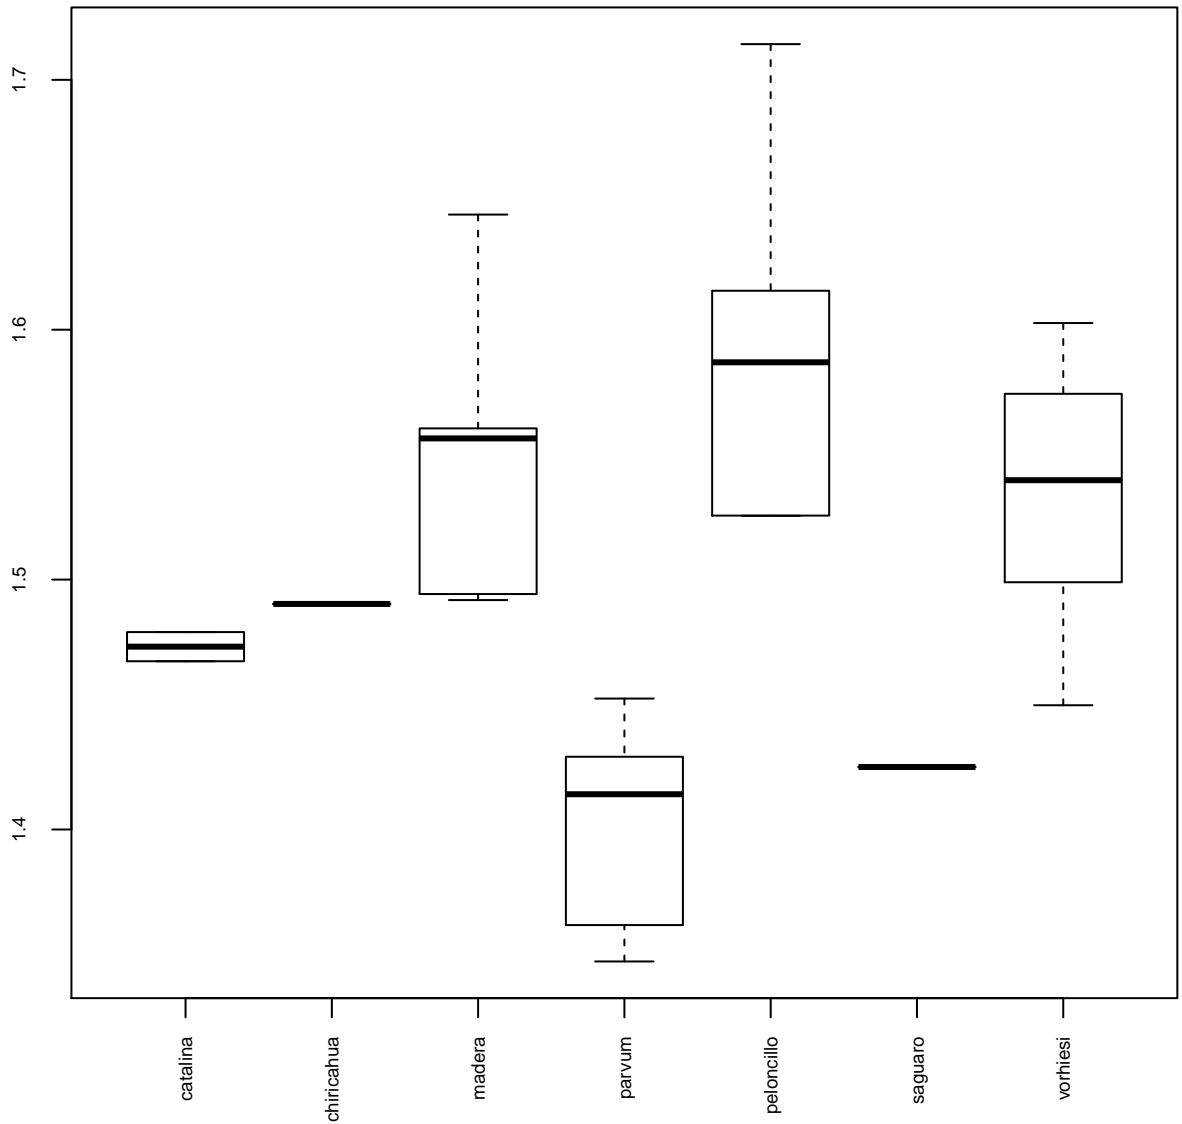

Supplement: Supplementary file 1366

## Tibia 3/Tibia 4 ratio – males

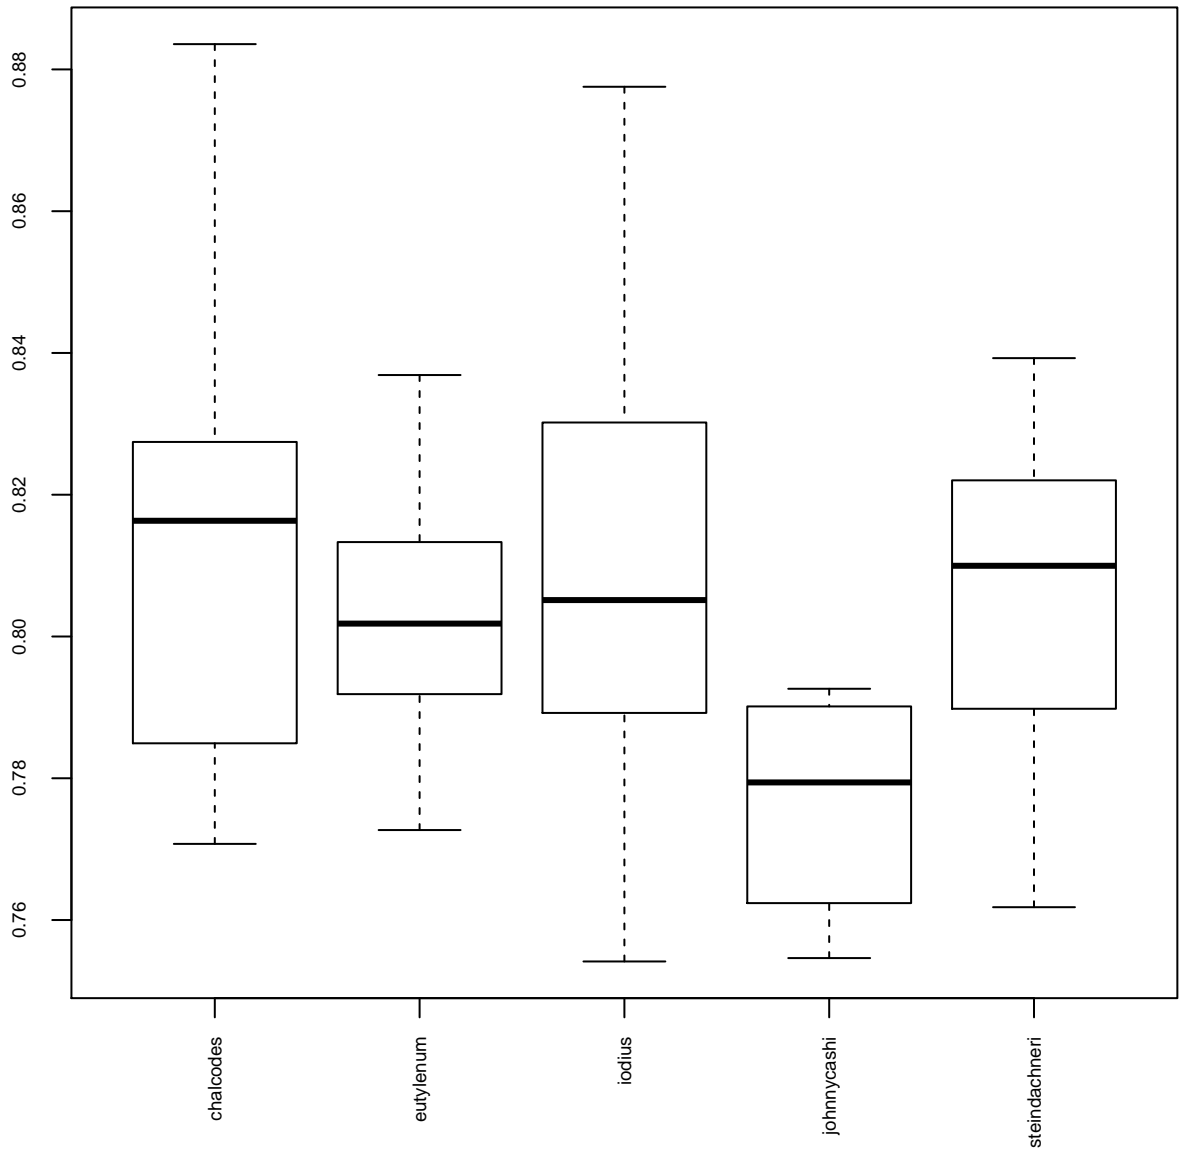

Supplement: Supplementary file 1367

# Femur 3 Length/Width ratio – males

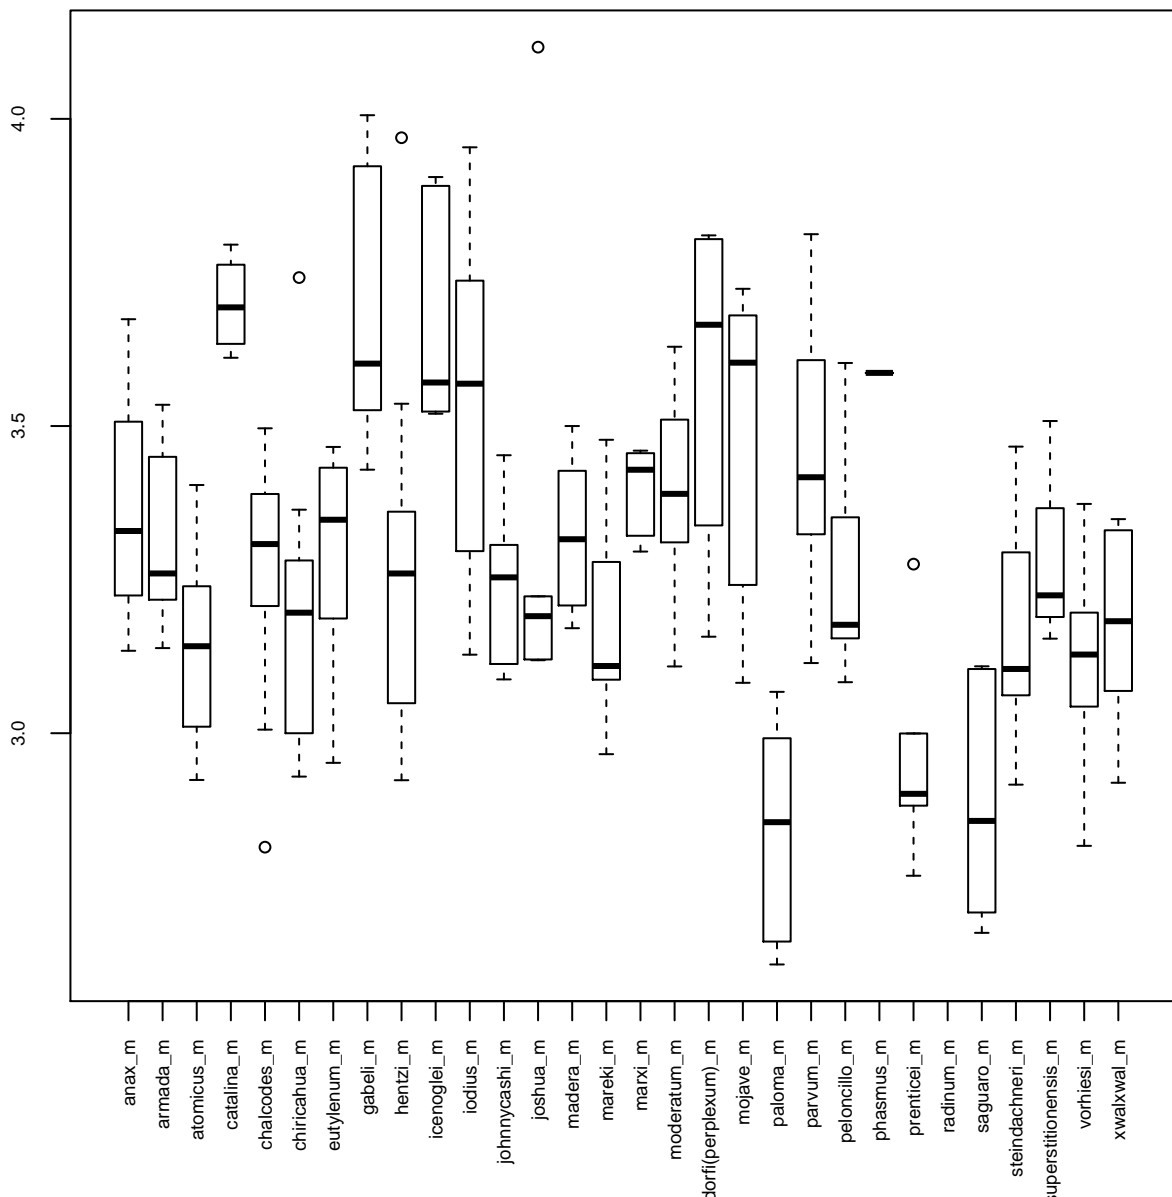

Supplement: Supplementary file 1368

## Tarsus 1/Patella 4 Length ratio – females

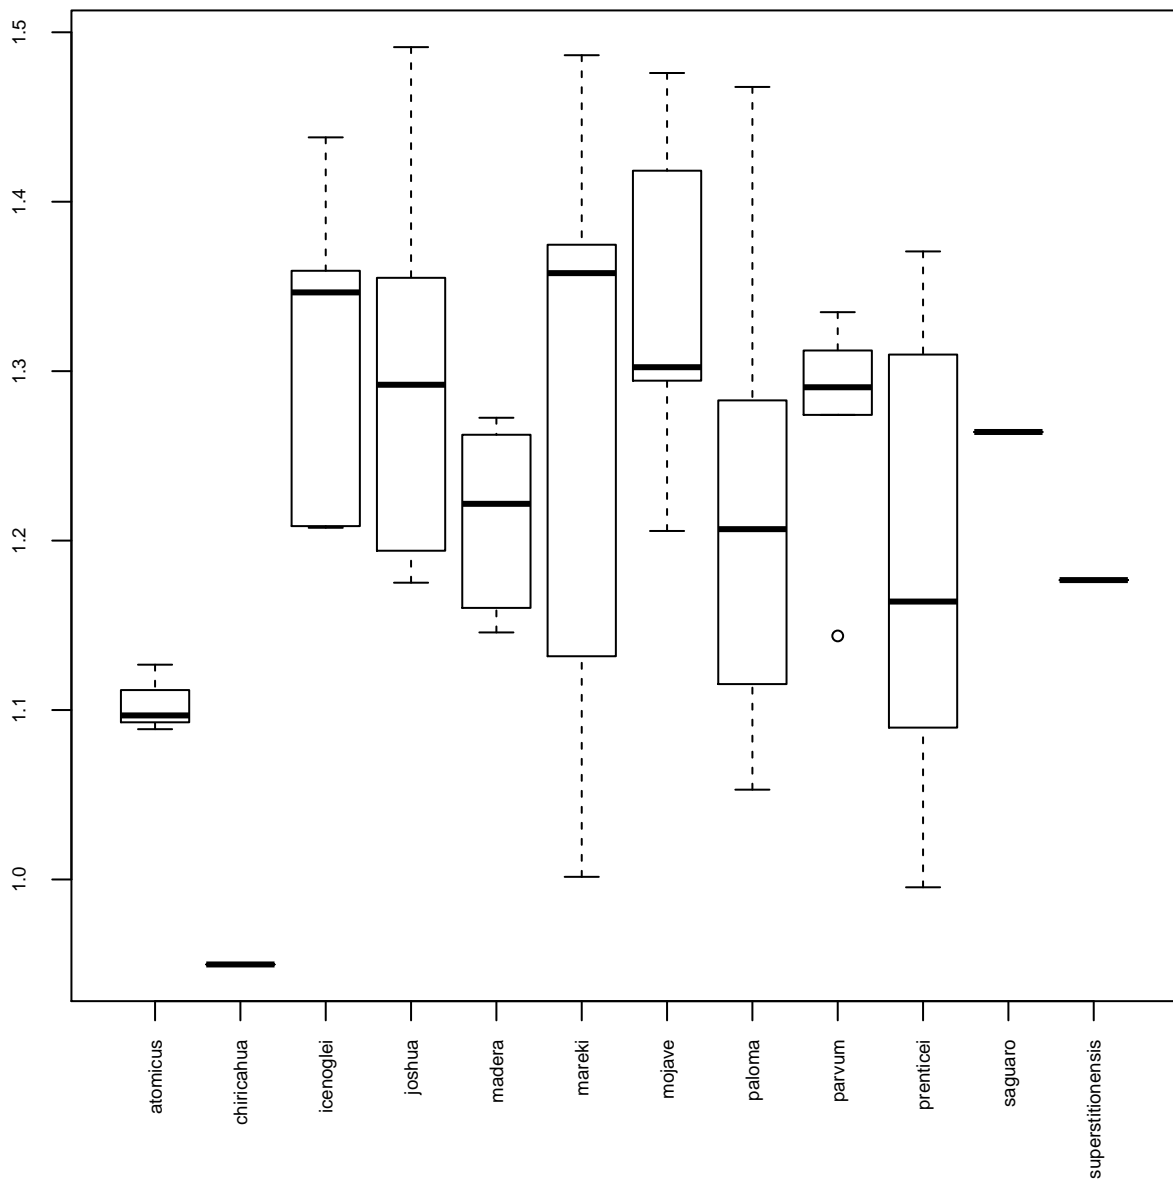

Supplement: Supplementary file 1369

# Femur 4/Patella 4 ratio – females

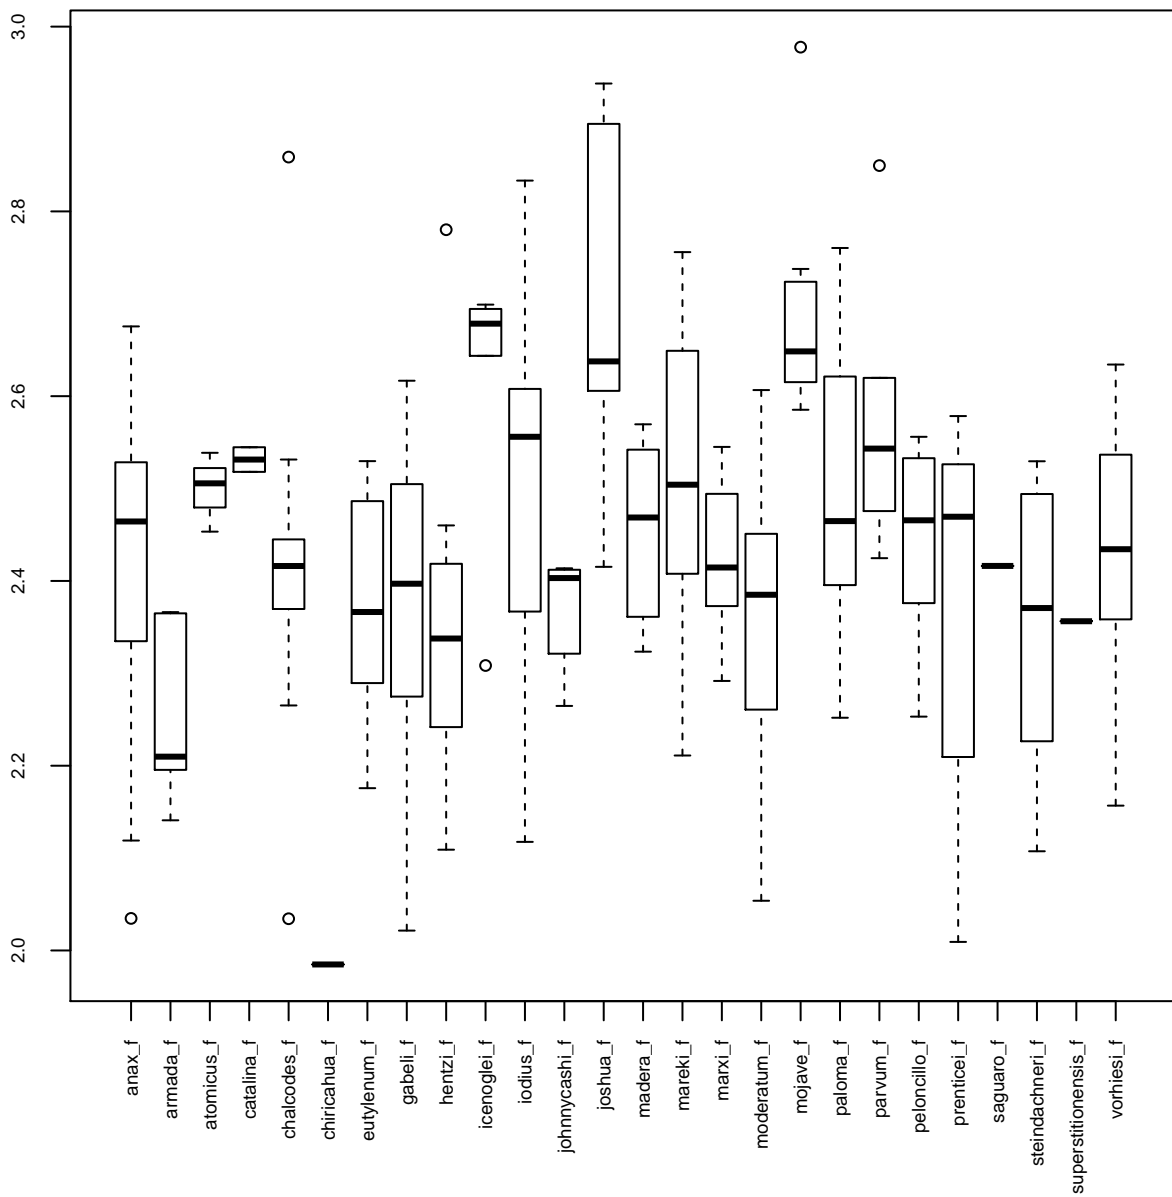

Supplement: Supplementary file 1370

## Tibia 3/Metatarsus 3 ratio – males

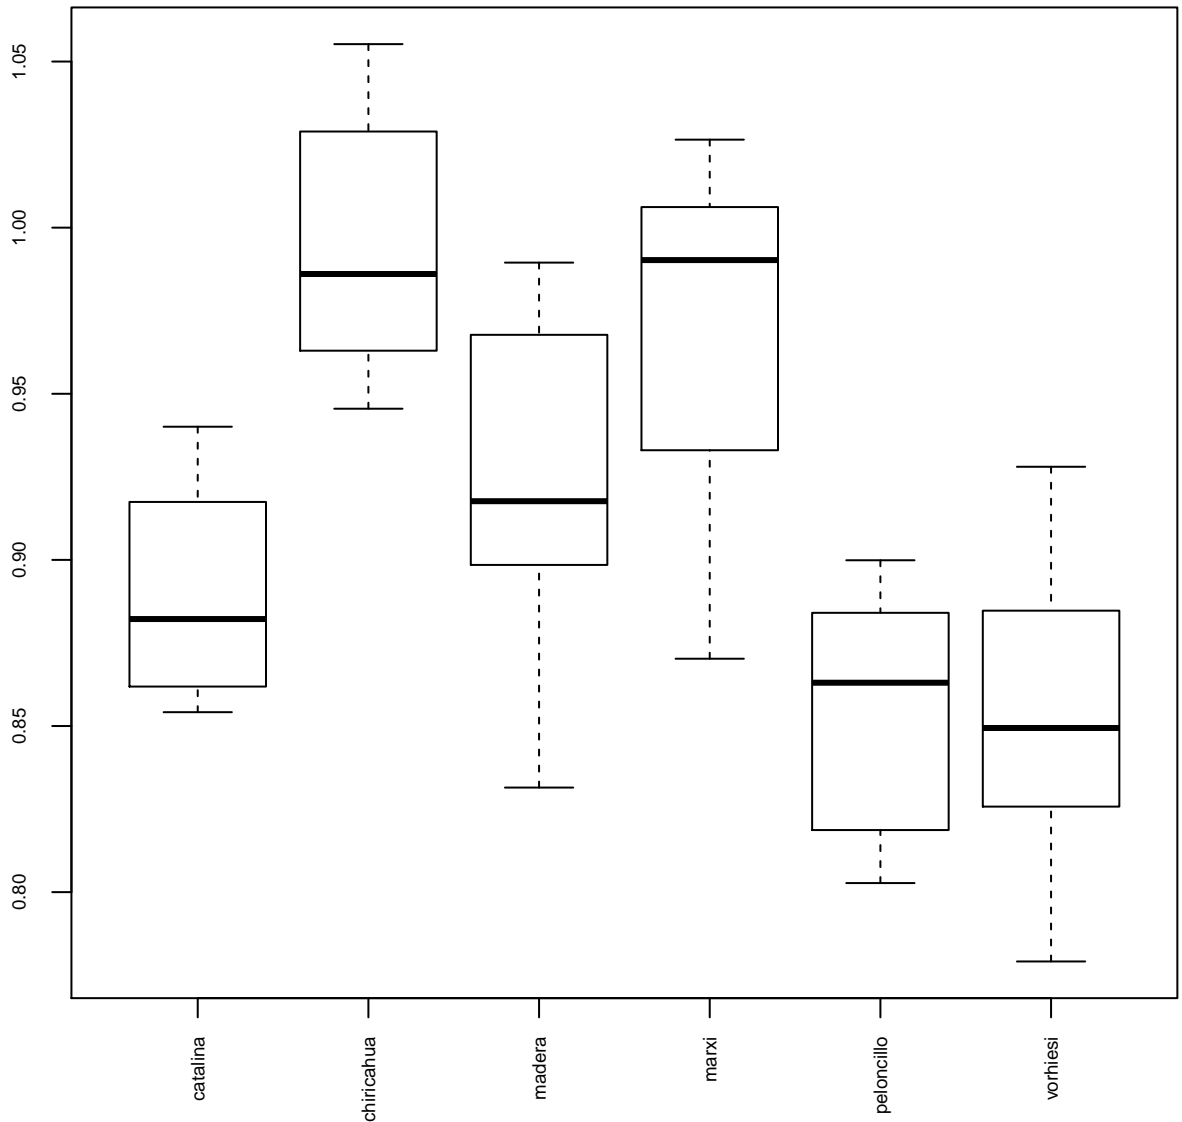

Supplement: Supplementary file 1371

## Femur 1/Tibia 1 ratio – females

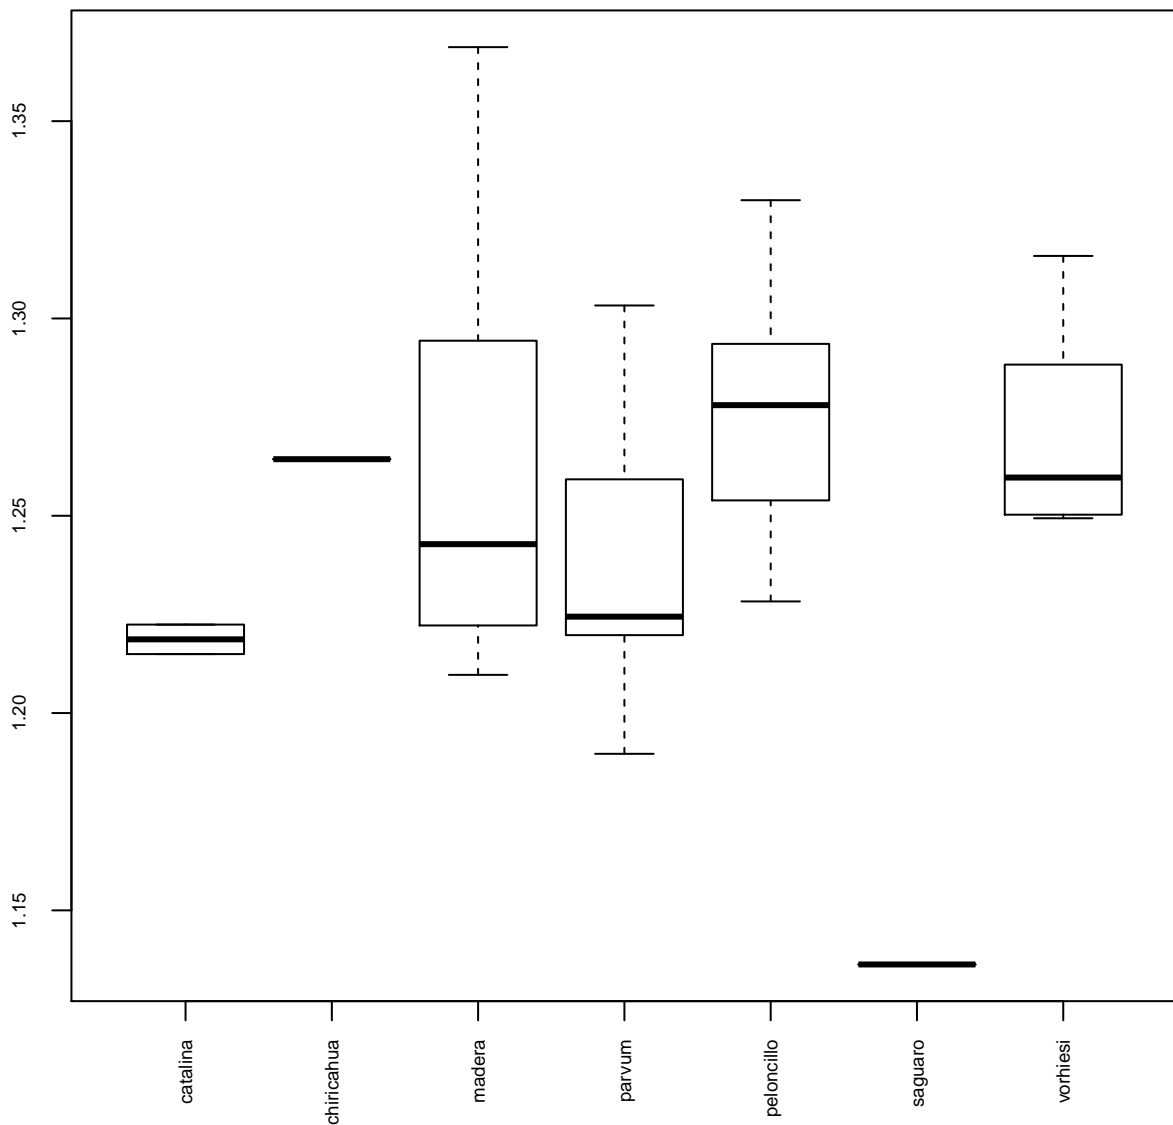

Supplement: Supplementary file 1372

## Tarsus 1/Tibia 4 Length ratio – males

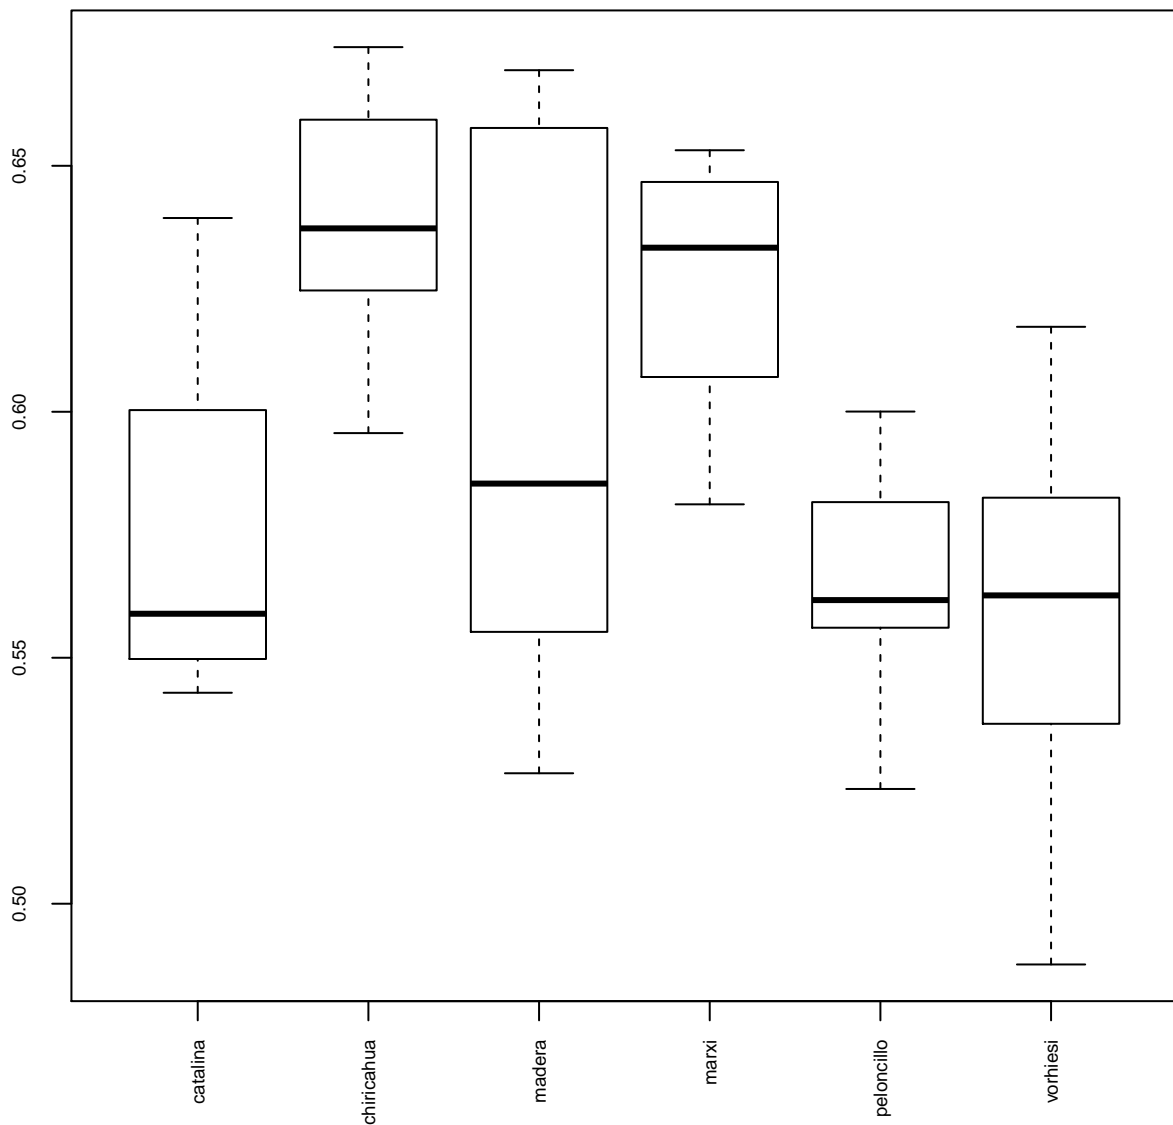

Supplement: Supplementary file 1373

## Tibia 1/Tarsus 3 Length ratio – males

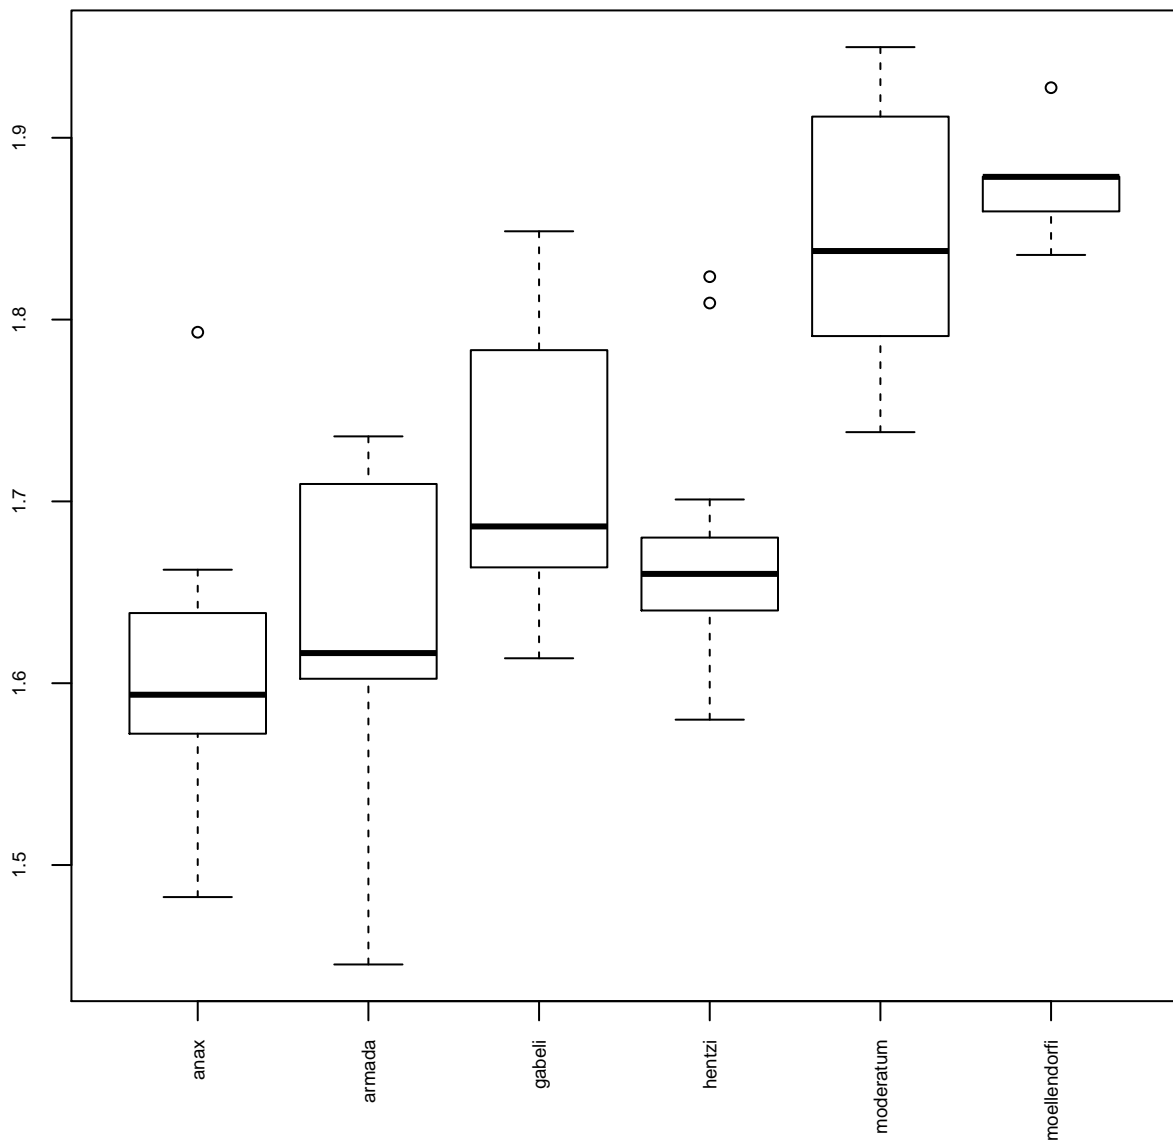

Supplement: Supplementary file 1374

## Tarsus 1/Tarsus 3 ratio – males

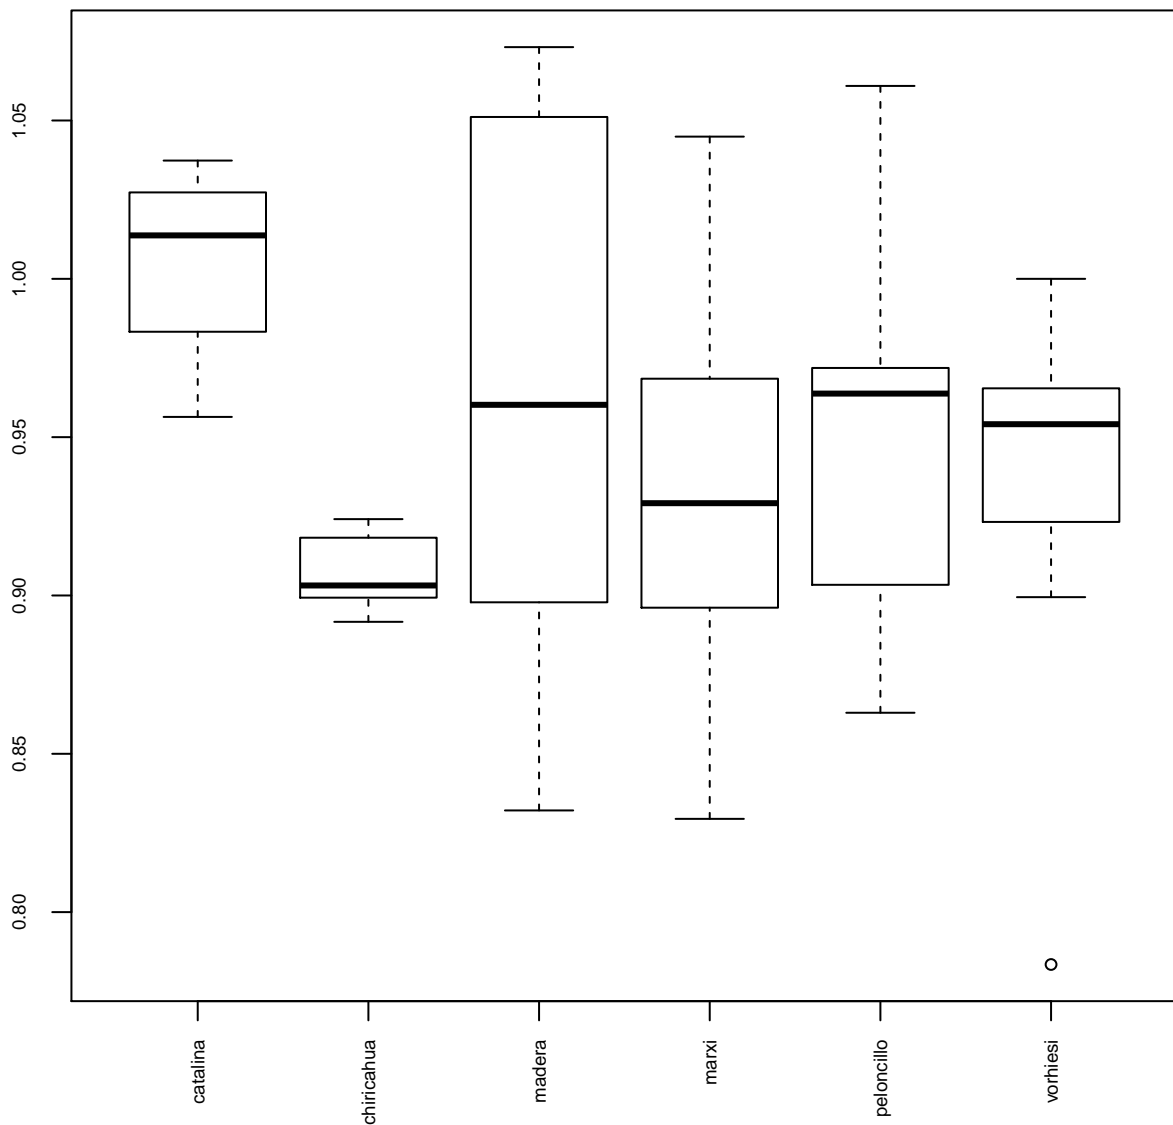

Supplement: Supplementary file 1375

# Patella 3/Femur 4 Length ratio – females

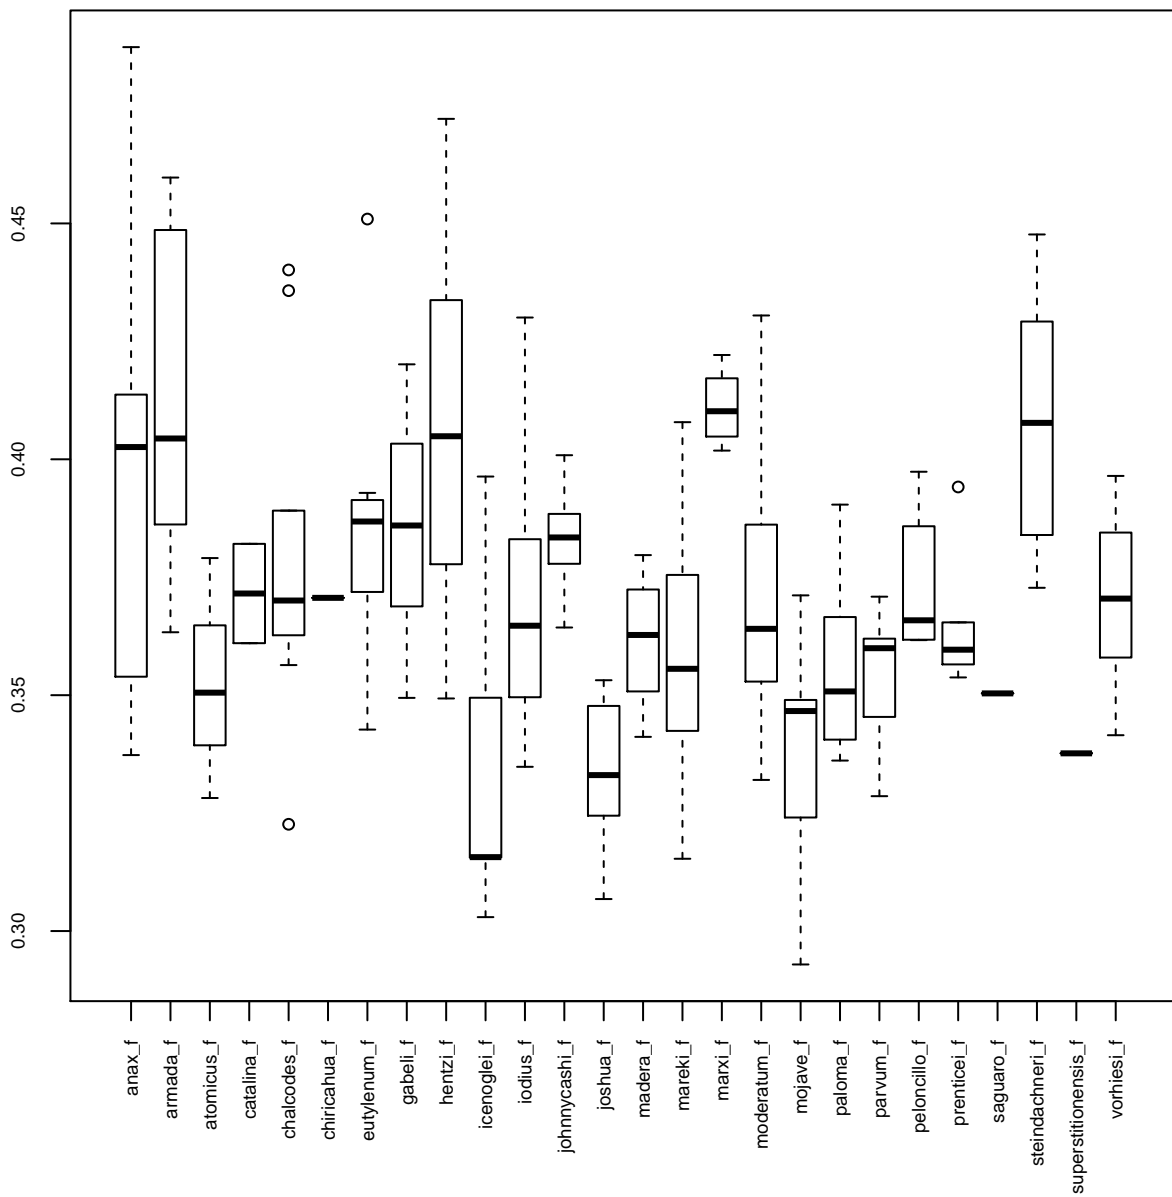

Supplement: Supplementary file 1376

# Tibia 3/Tarsus 4 Length ratio – females

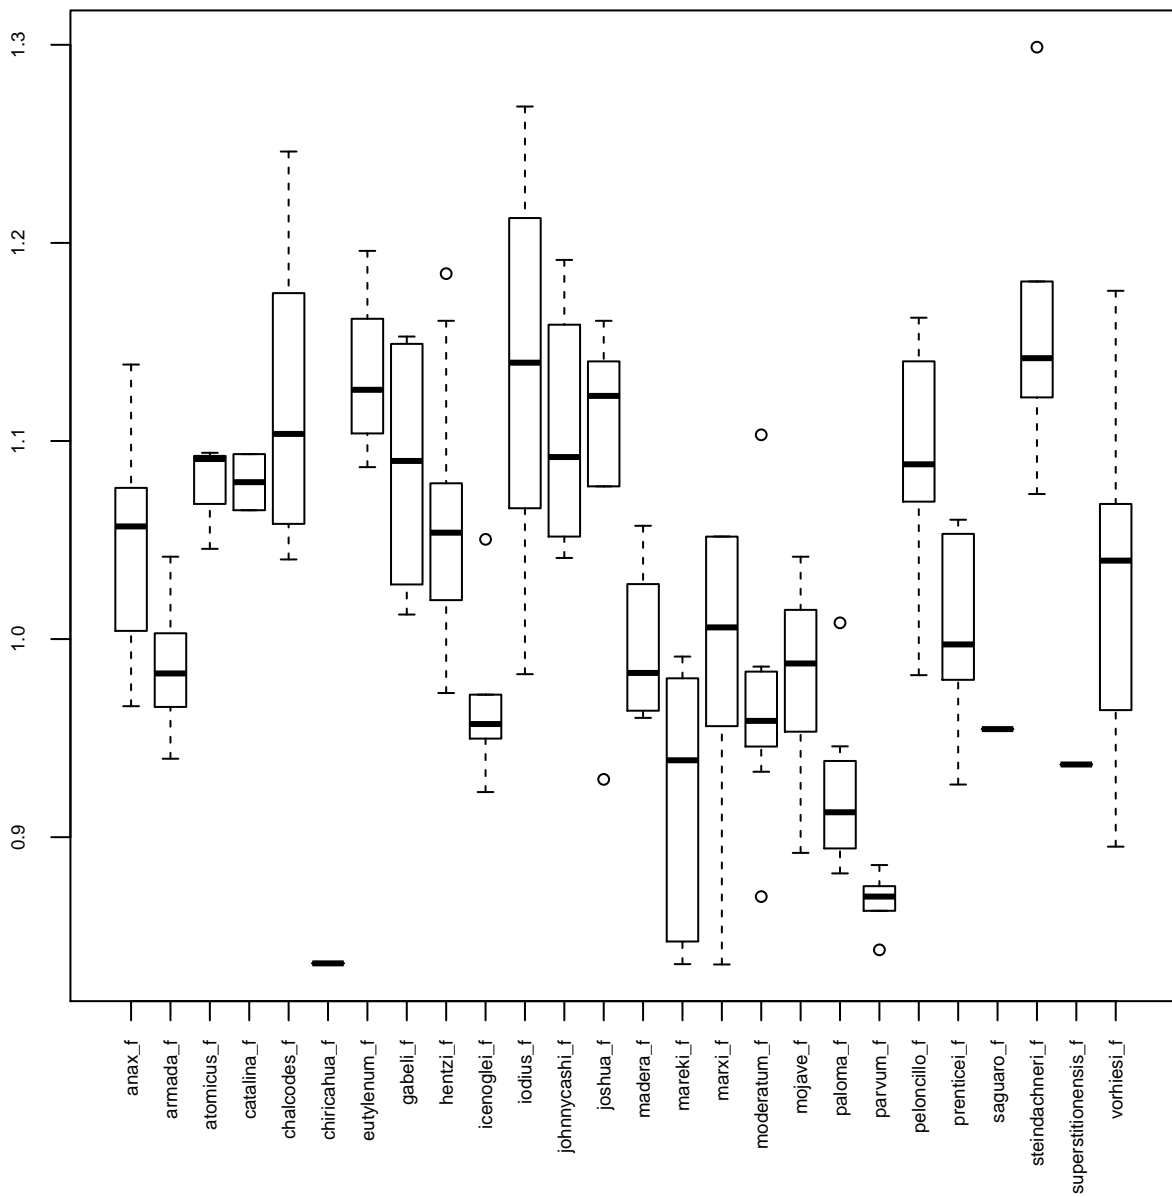

Supplement: Supplementary file 1377

## Femur 1/Patella 1 ratio – males

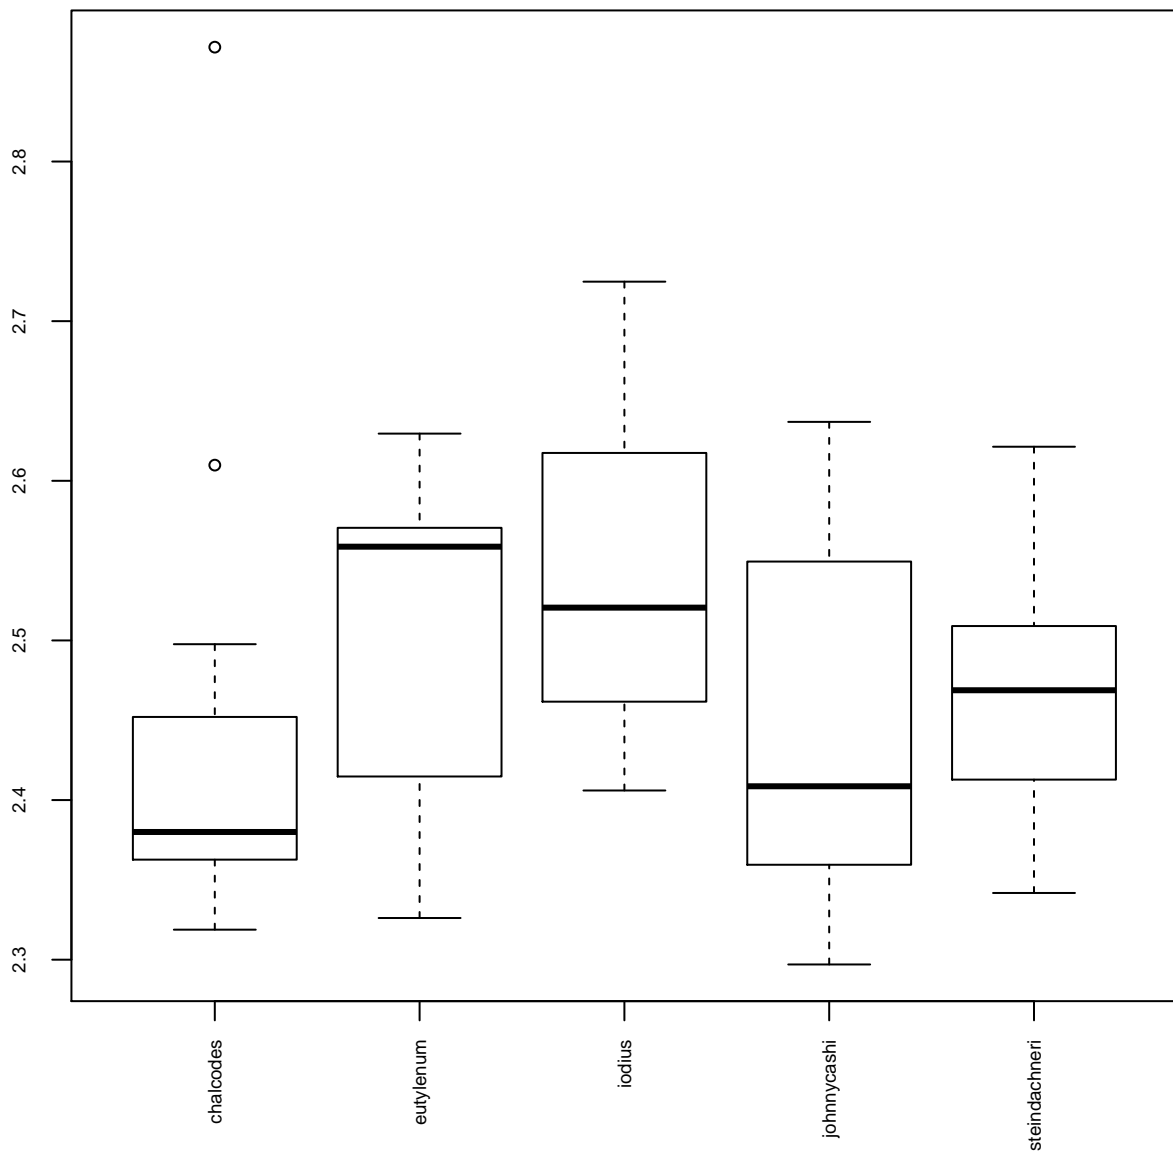

Supplement: Supplementary file 1378

## Metatarsus 1/Femur 3 Length ratio – females

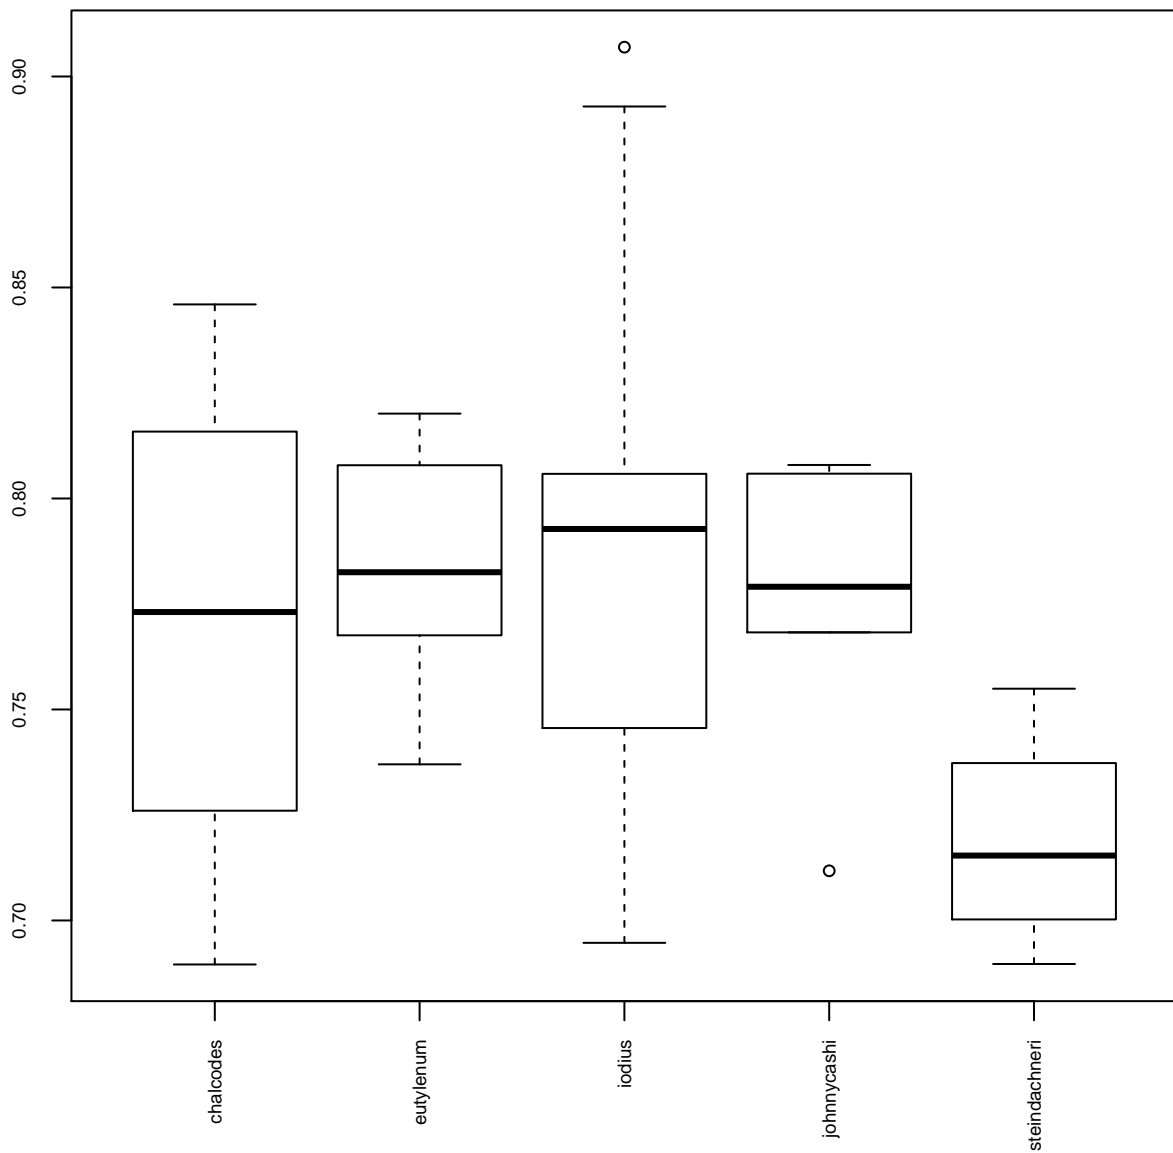

Supplement: Supplementary file 1379

## Femur 4/Metatarsus 4 ratio – males

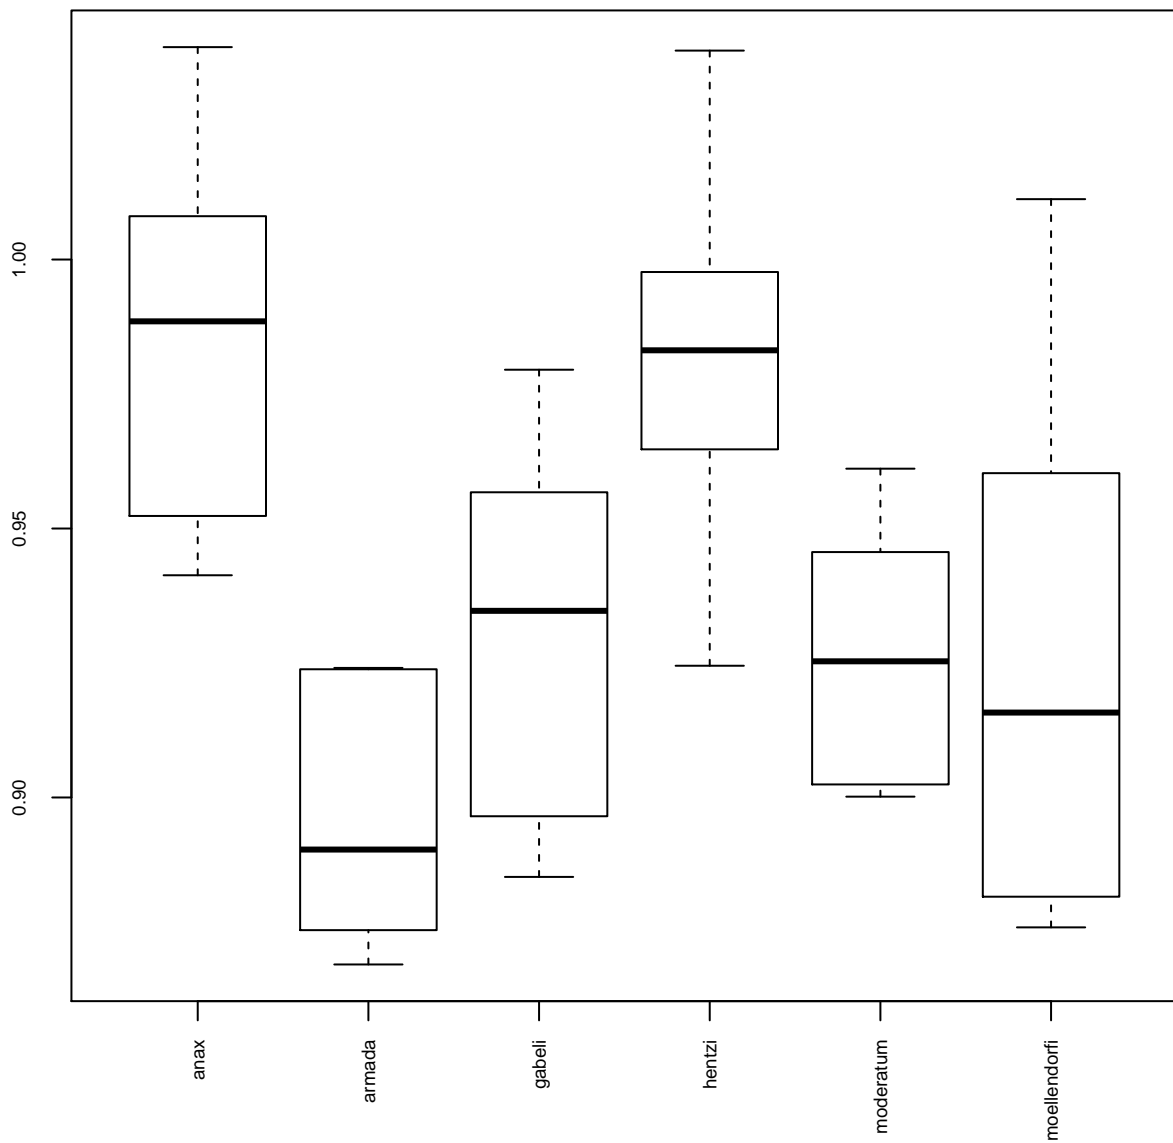

Supplement: Supplementary file 1380

# Carapace Length/Tarsus 4 ratio – males

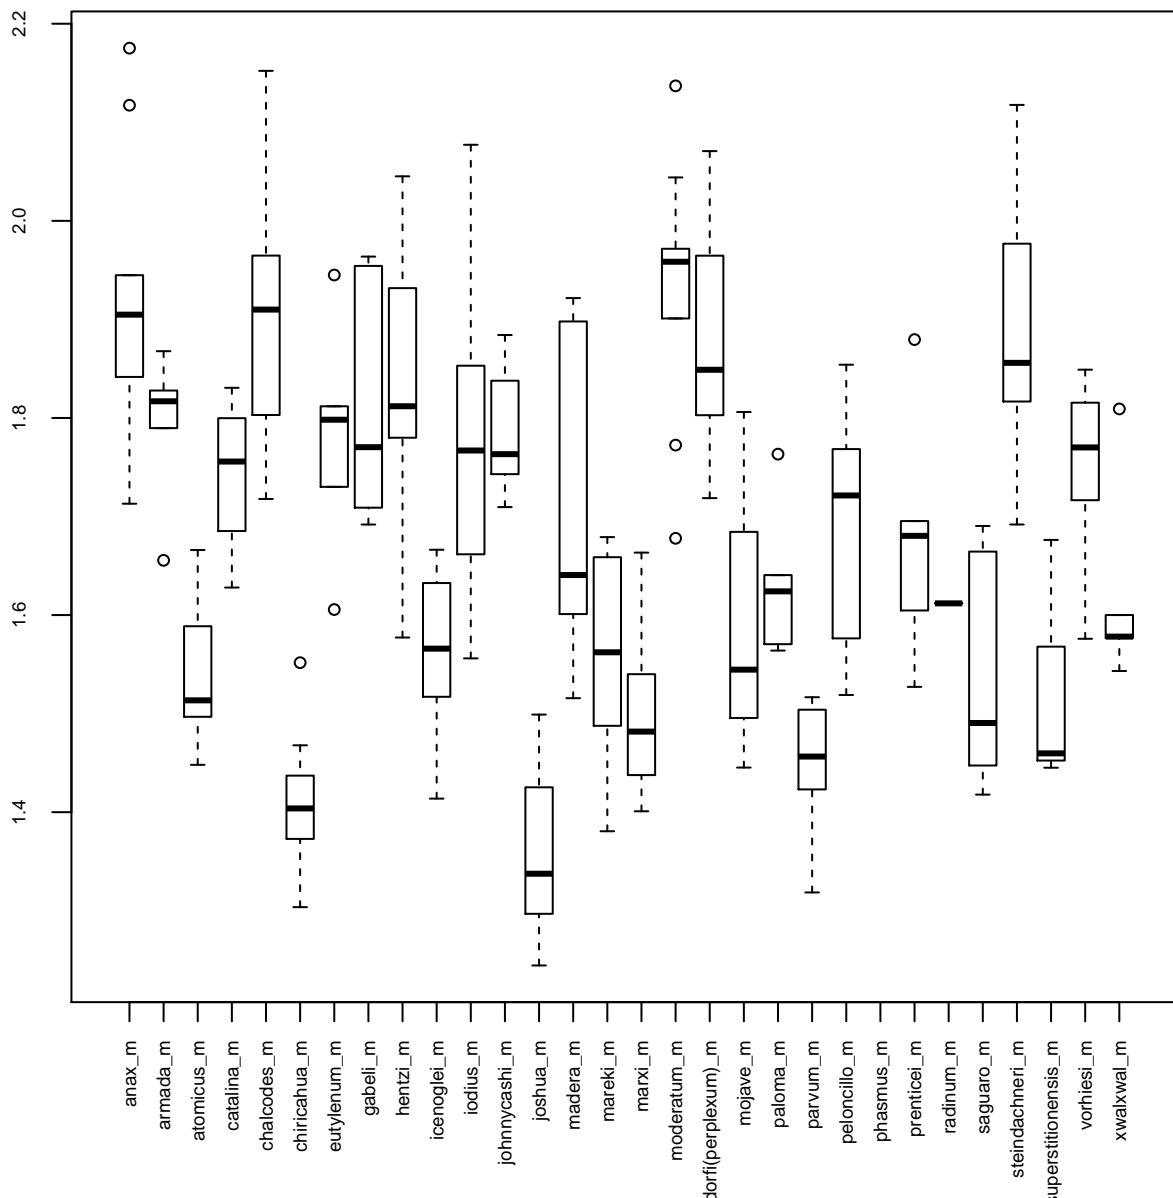

Supplement: Supplementary file 1381

## Leg 3/Leg 4 Length ratio – males

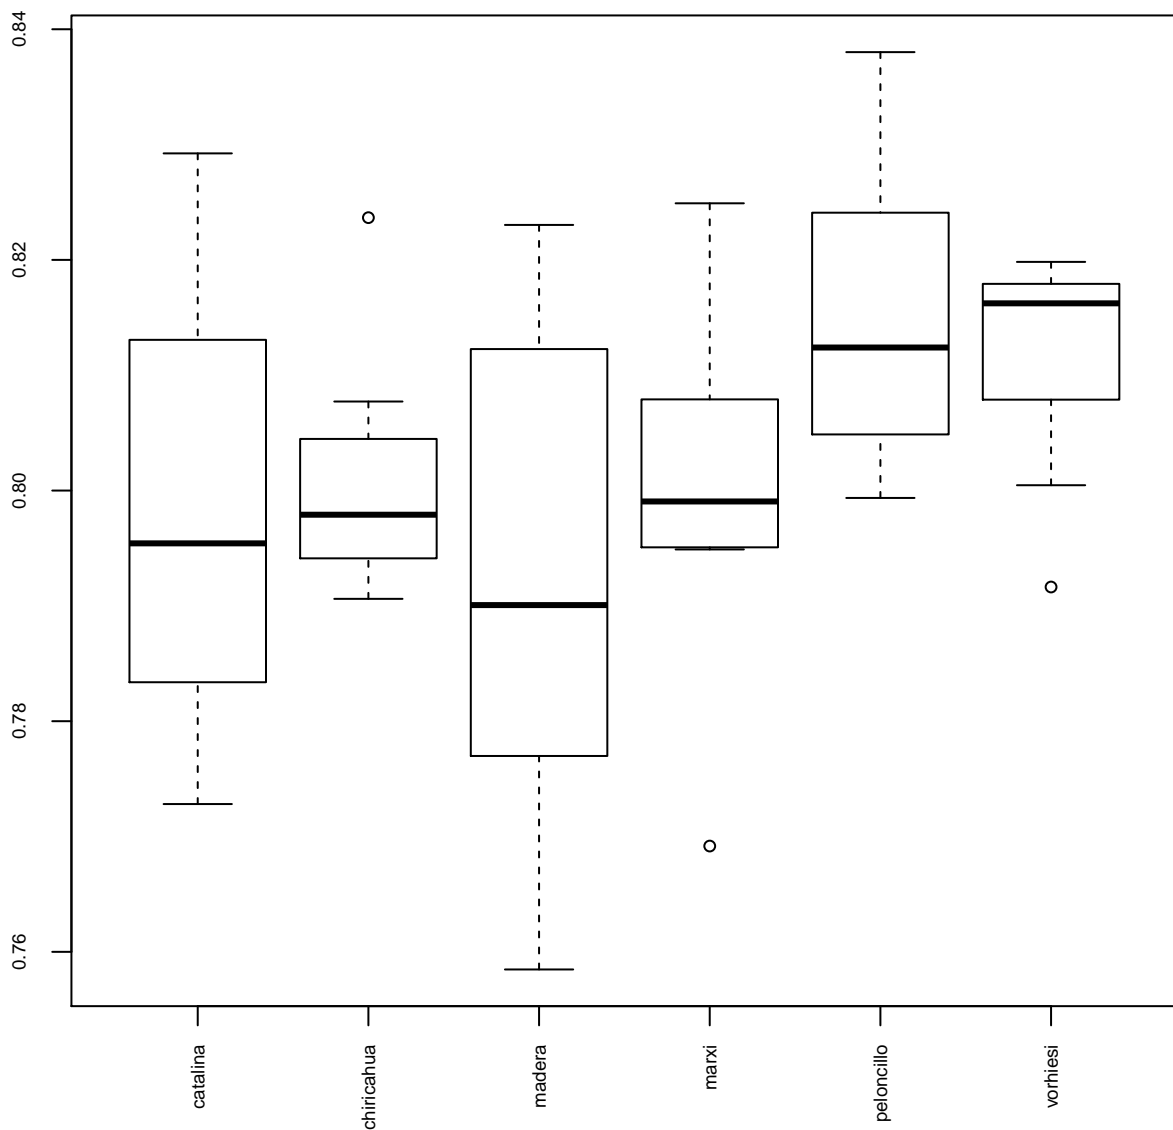

Supplement: Supplementary file 1382

## Tibia 1/Metatarsus 3 Length ratio – females

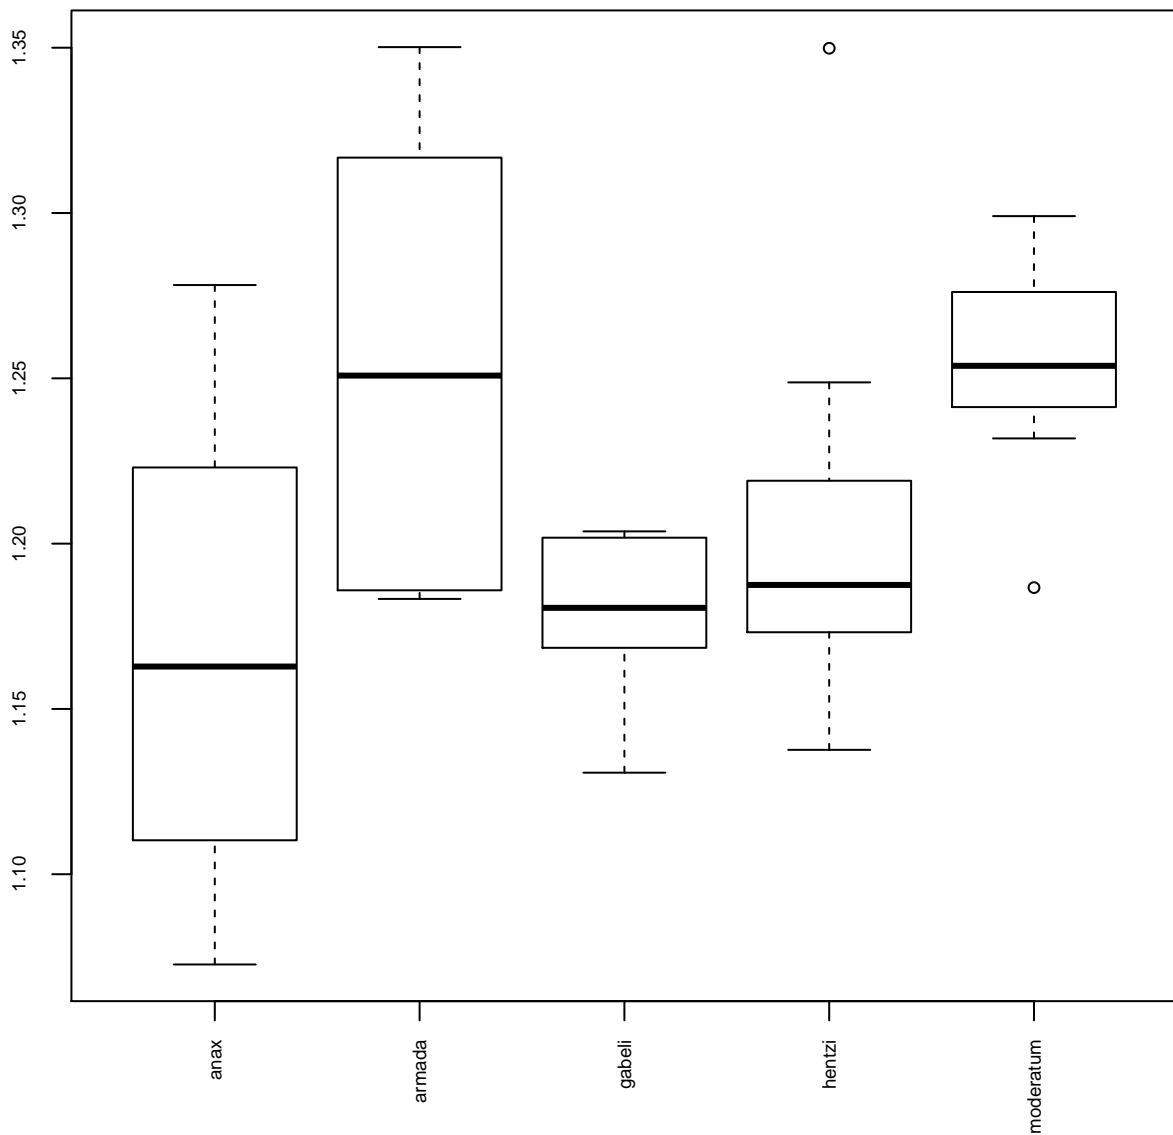

Supplement: Supplementary file 1383

## Palpal Tibia/Metatarsus 3 Length ratio – males

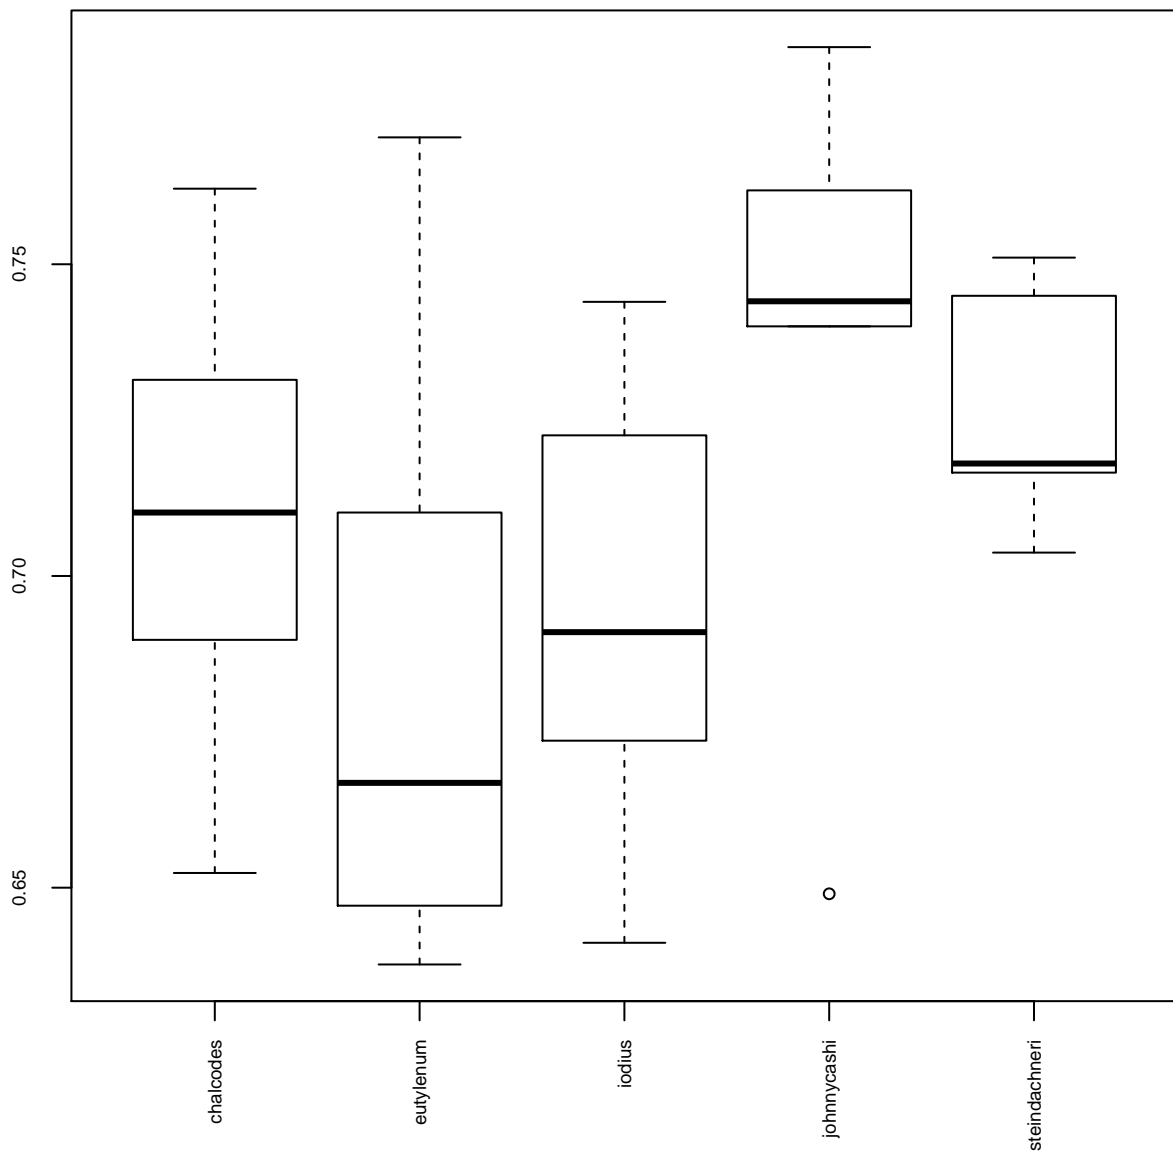

Supplement: Supplementary file 1384

## Patella 1/Metatarsus 4 Length ratio – males

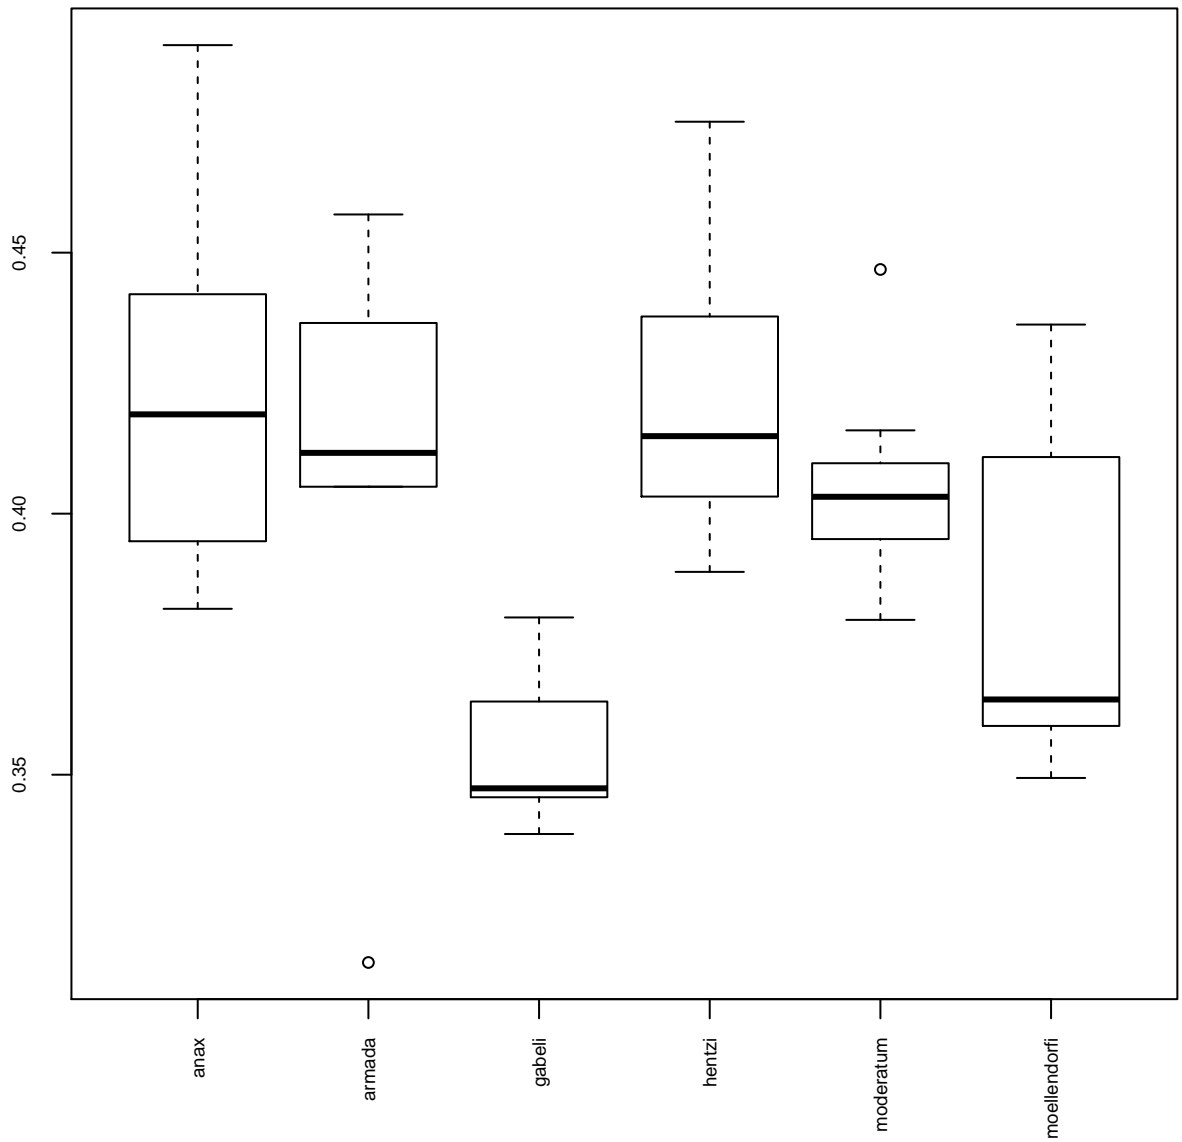

Supplement: Supplementary file 1385

## Metatarsus 3/Tarsus 4 Length ratio – males

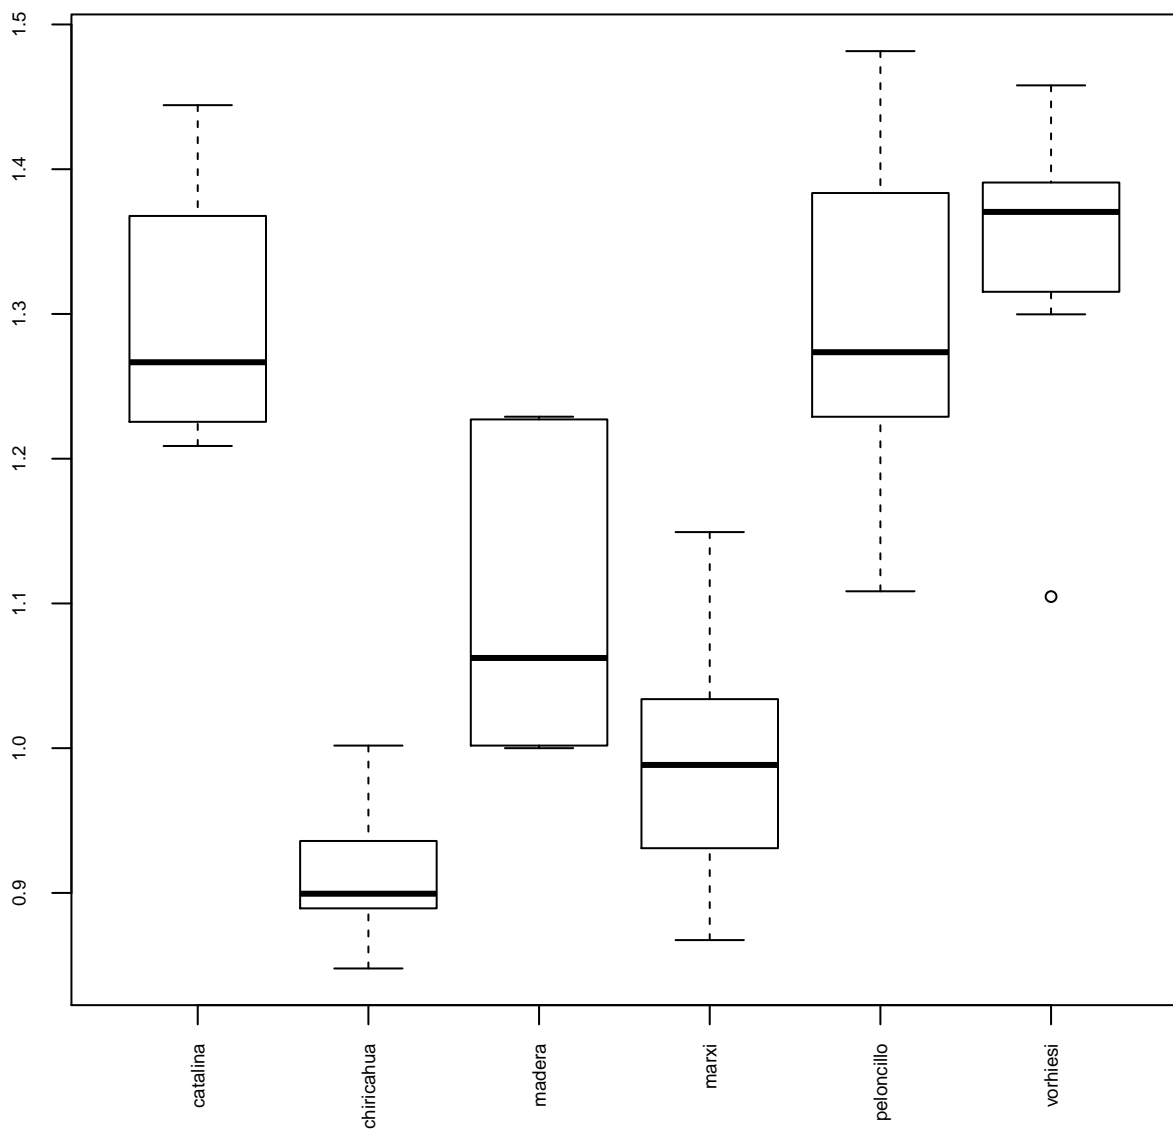

Supplement: Supplementary file 1386

## Carapace Length/Femur 4 ratio – males

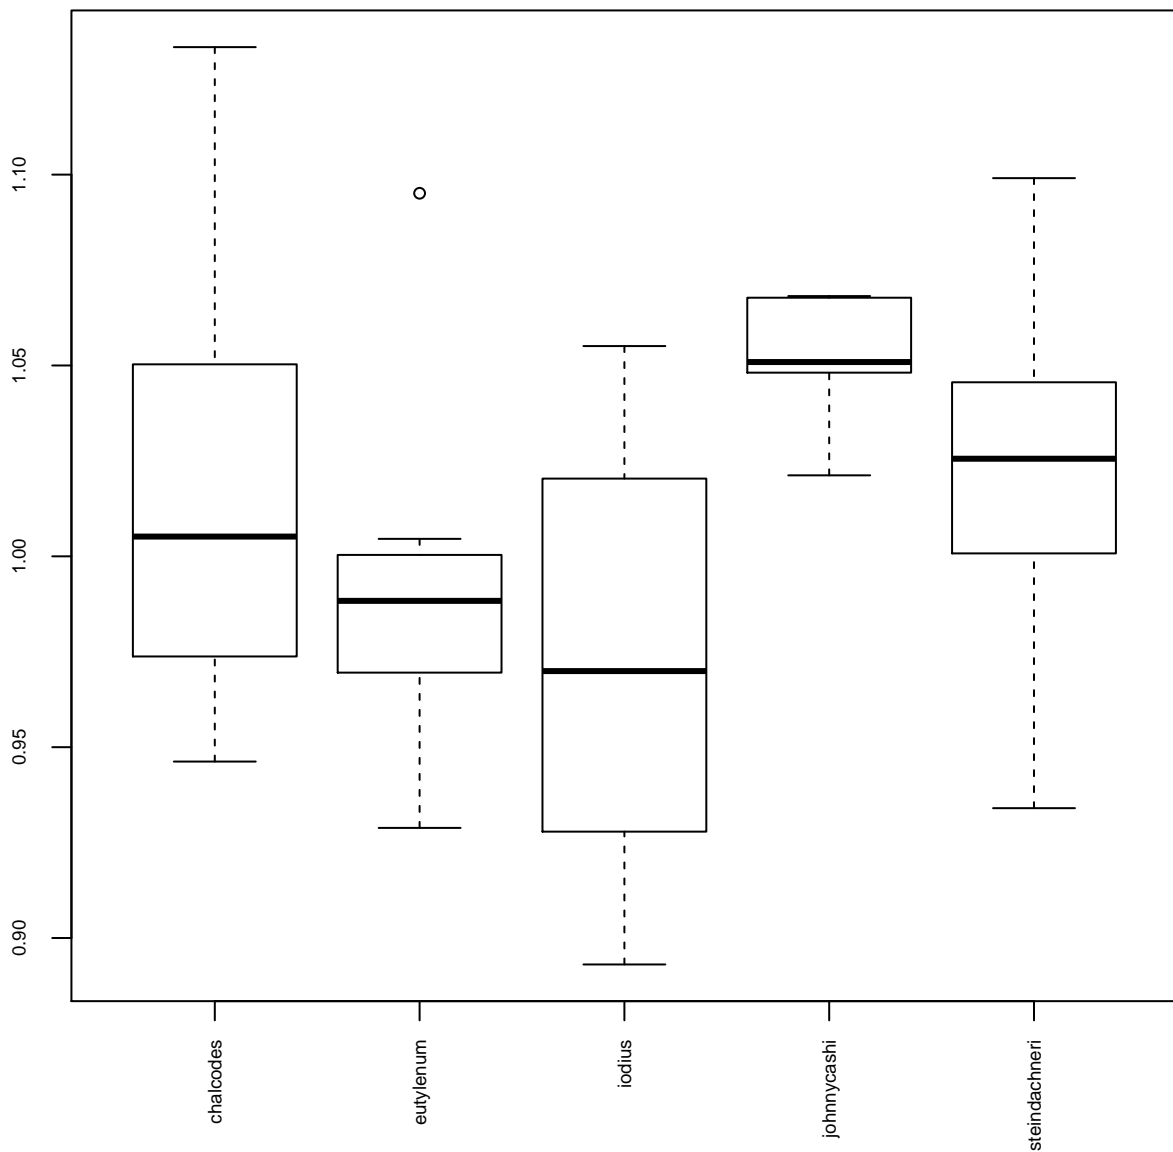

Supplement: Supplementary file 1387

## Patella 3/Metatarsus 4 Length ratio – males

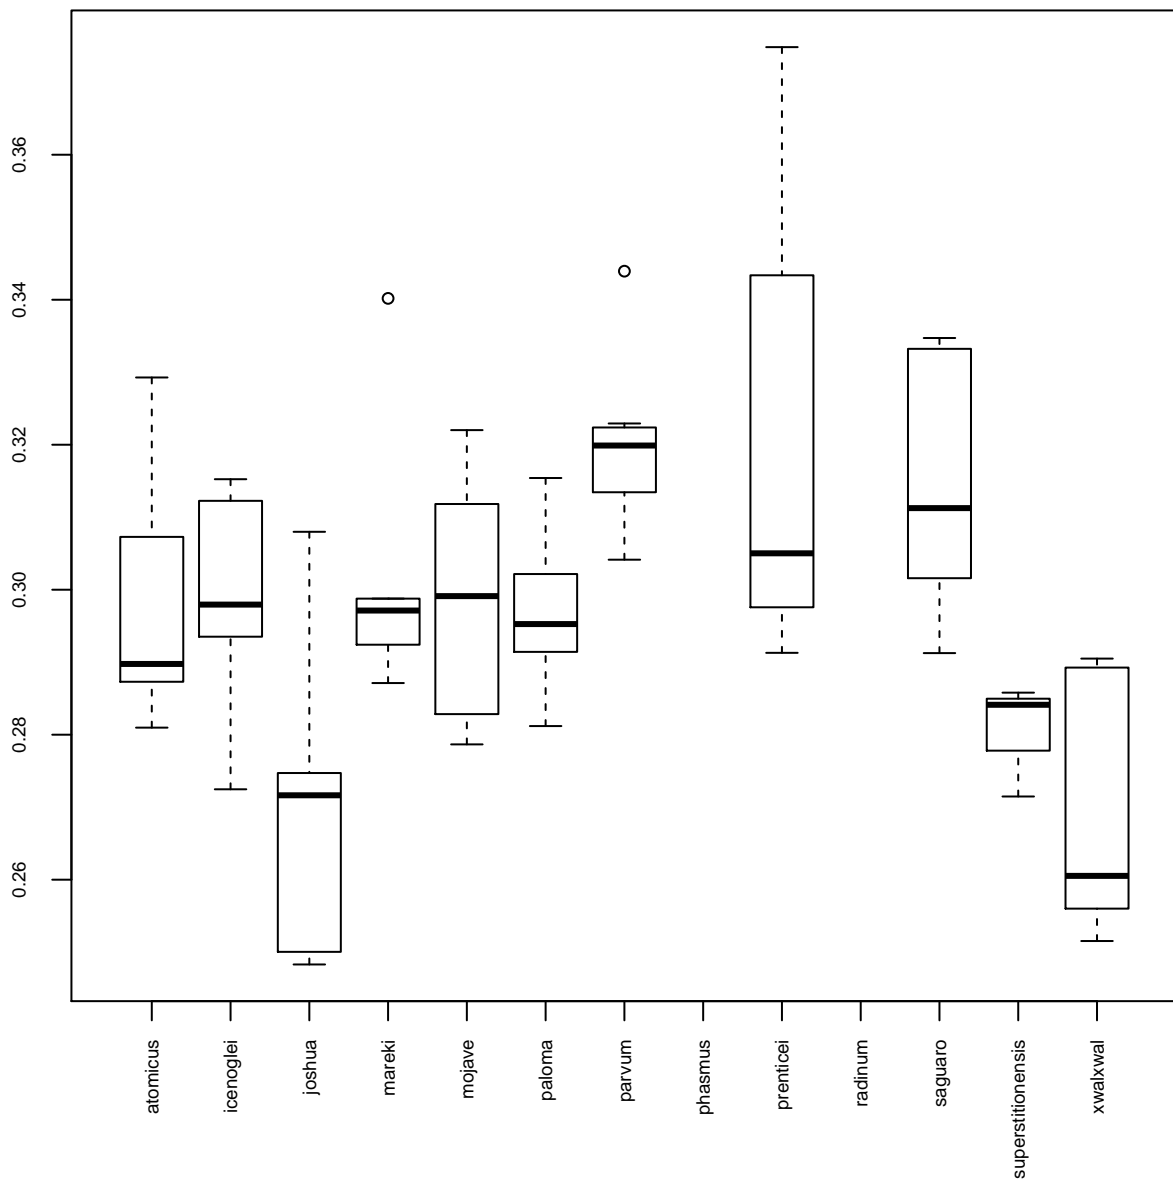

Supplement: Supplementary file 1388

## Palpal Tibia/Tibia 3 Length ratio – males

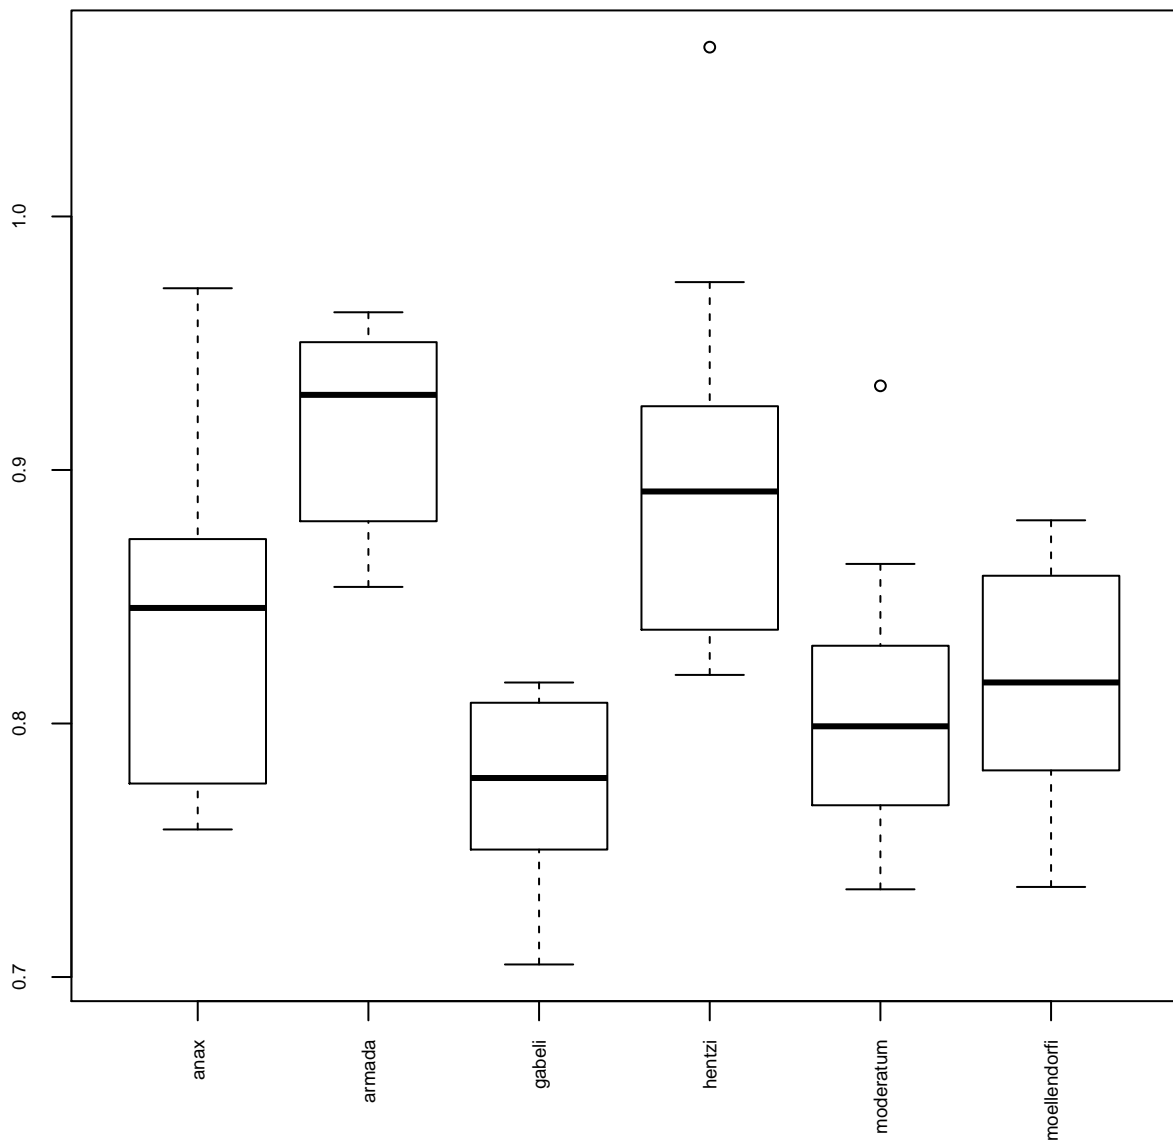

Supplement: Supplementary file 1389

## Femur 1/Tibia 4 ratio – females

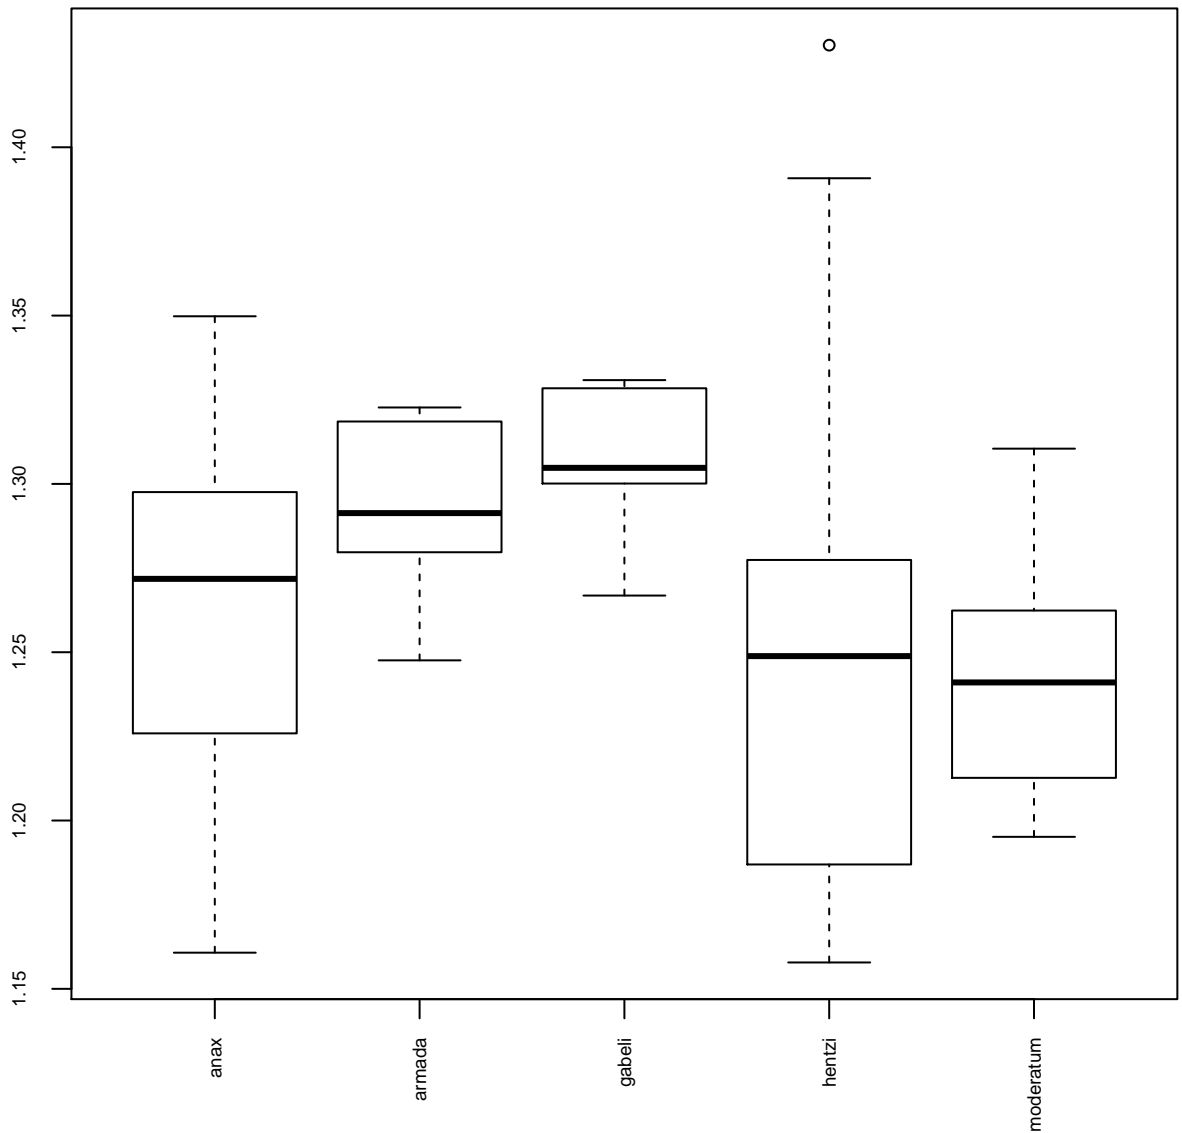

Supplement: Supplementary file 1390

## Palpal Tibia/Tibia 1 Length ratio – males

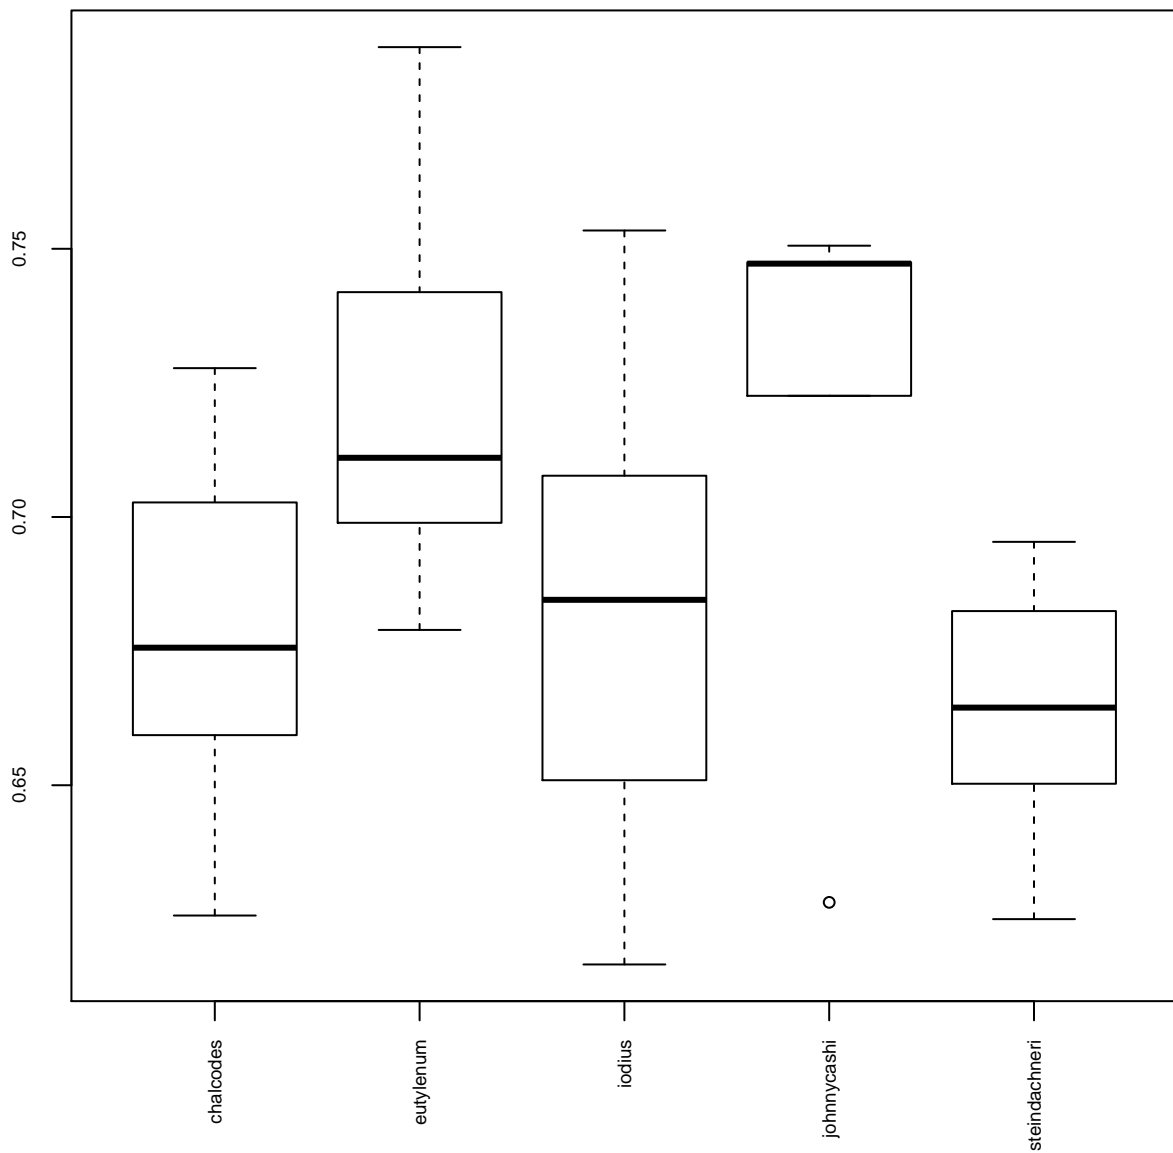

Supplement: Supplementary file 1391

# Metatarsus 3/Tibia 4 Length ratio – males

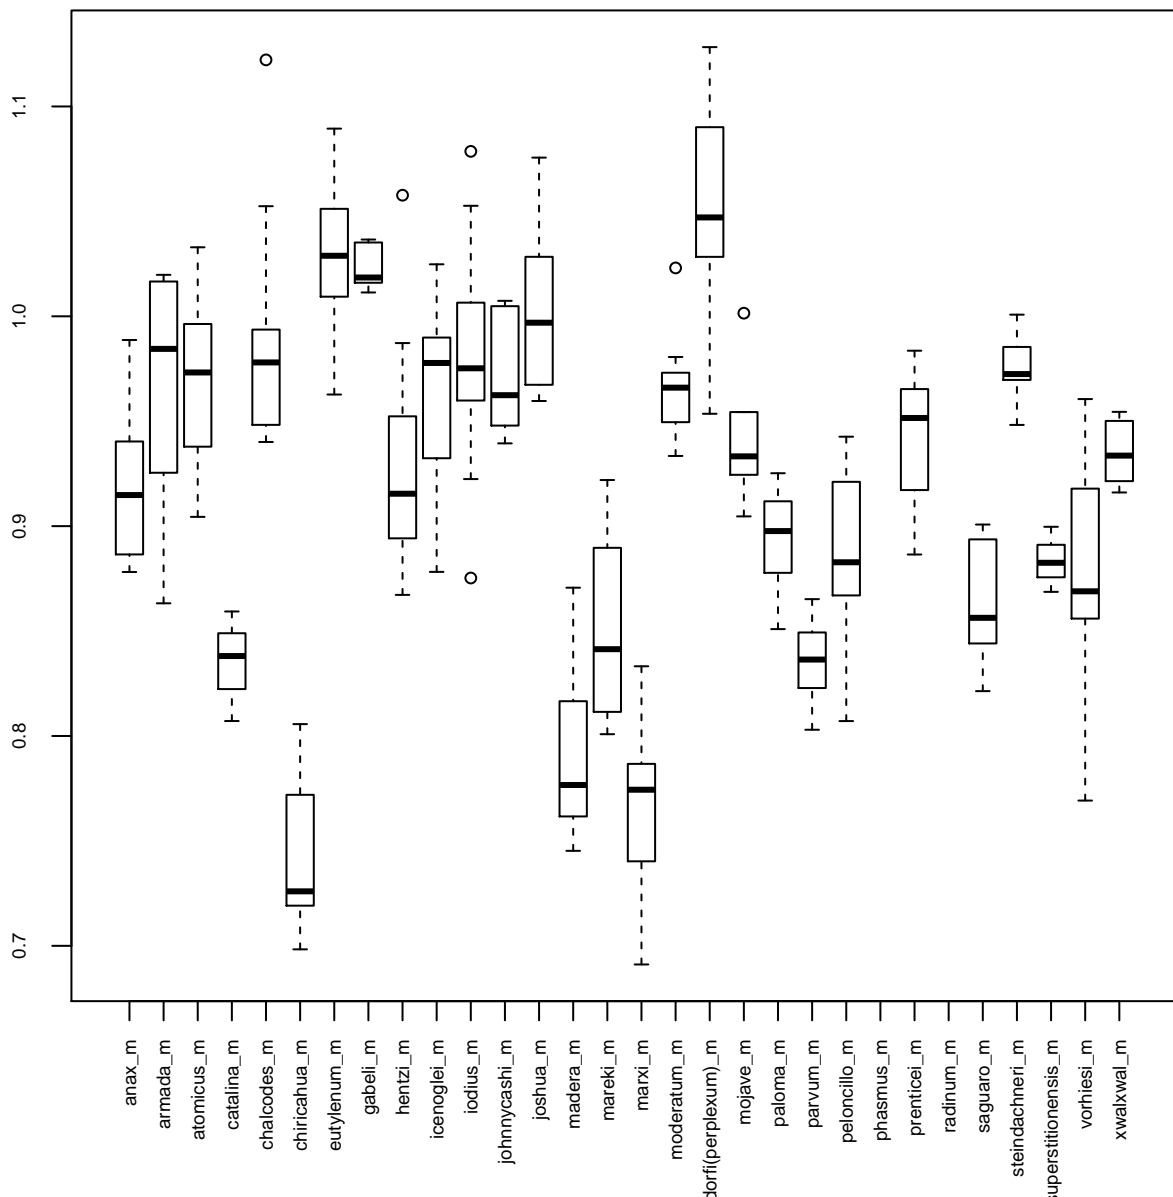

Supplement: Supplementary file 1392

# Femur 4 Length/Width ratio – males

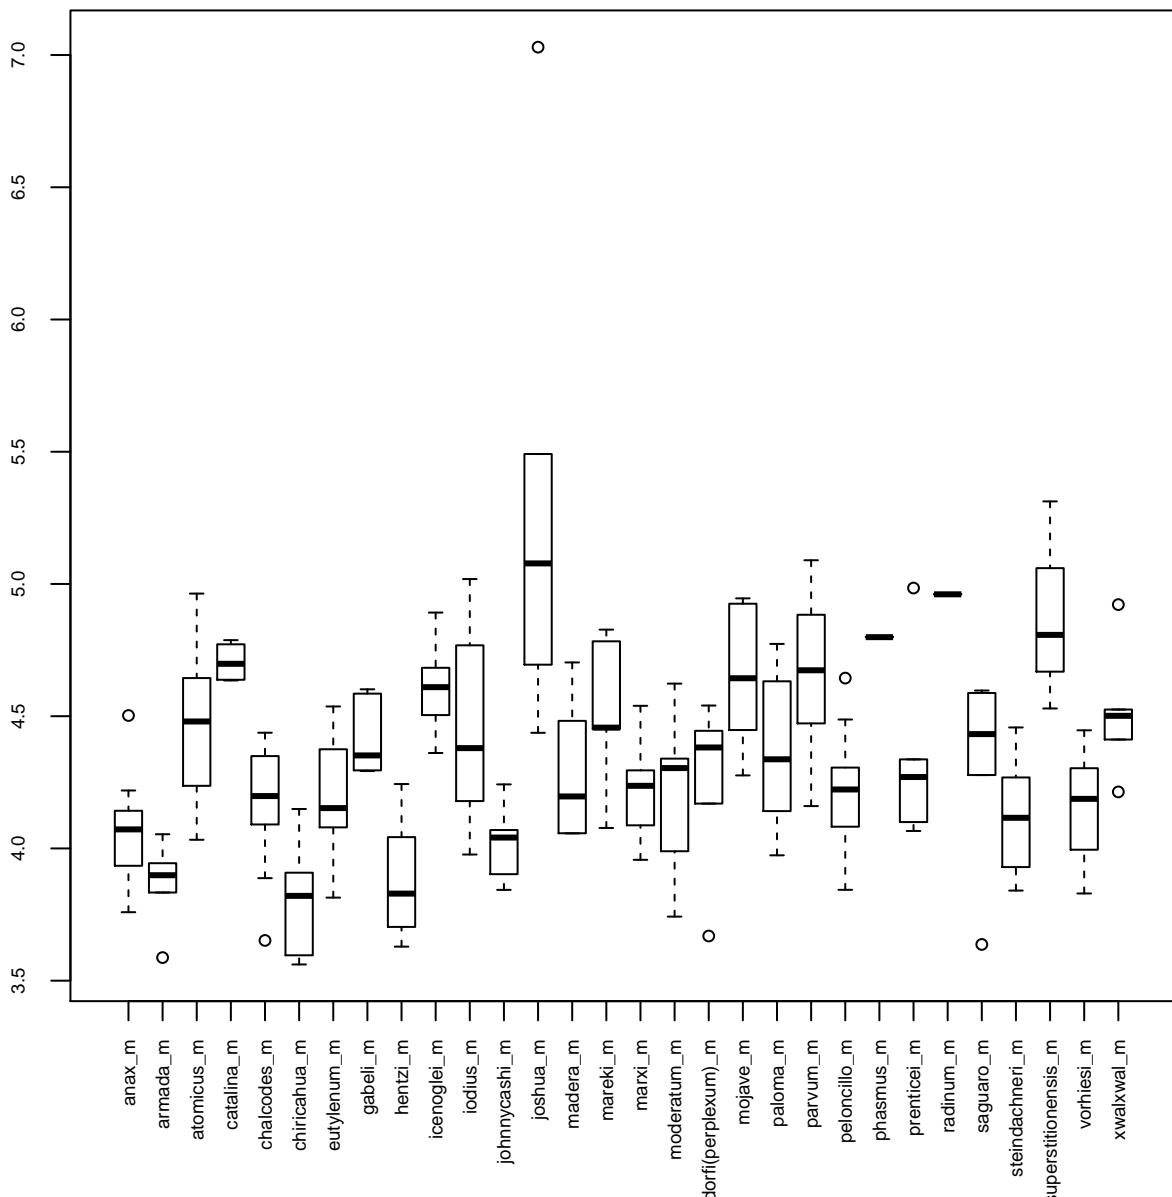

Supplement: Supplementary file 1393

# Metatarsus 1/Tarsus 3 Length ratio – males

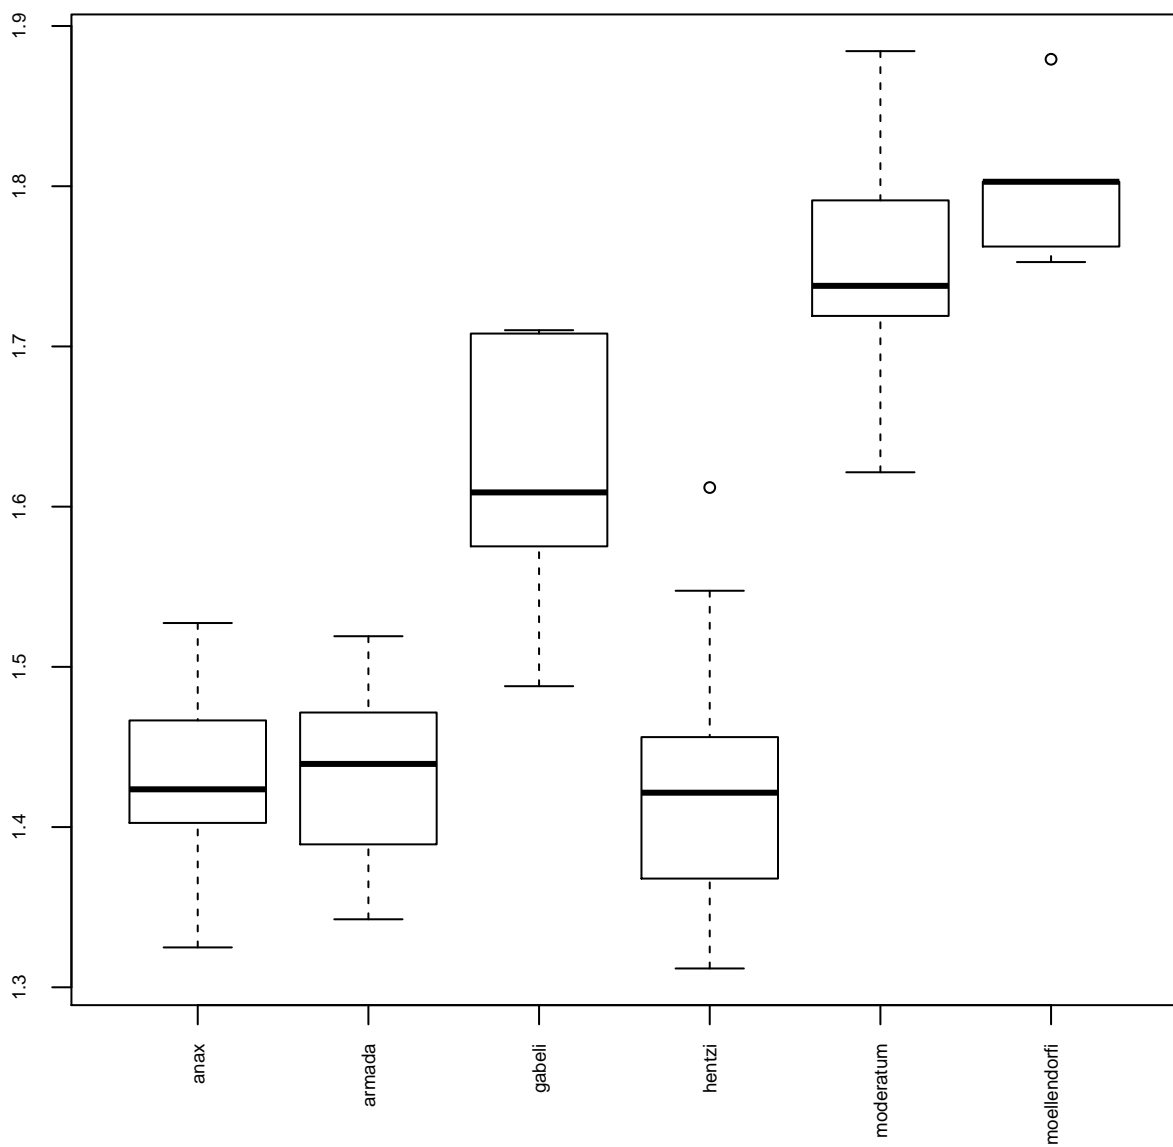

Supplement: Supplementary file 1394

# Patella 4/Tibia 4 ratio – males

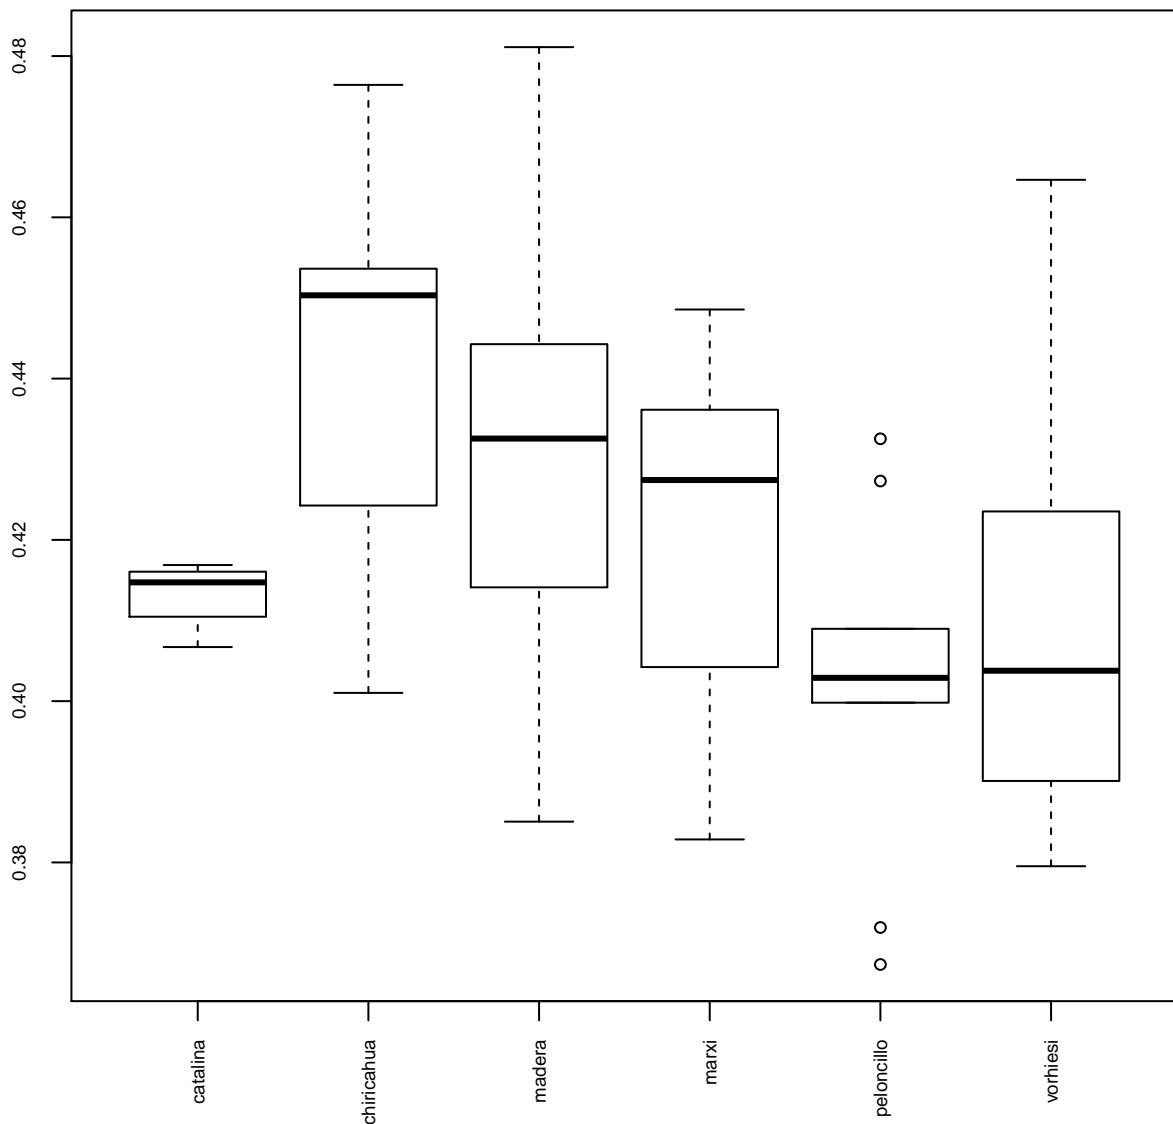

Supplement: Supplementary file 1395

## Tibia 3/Tarsus 4 Length ratio – males

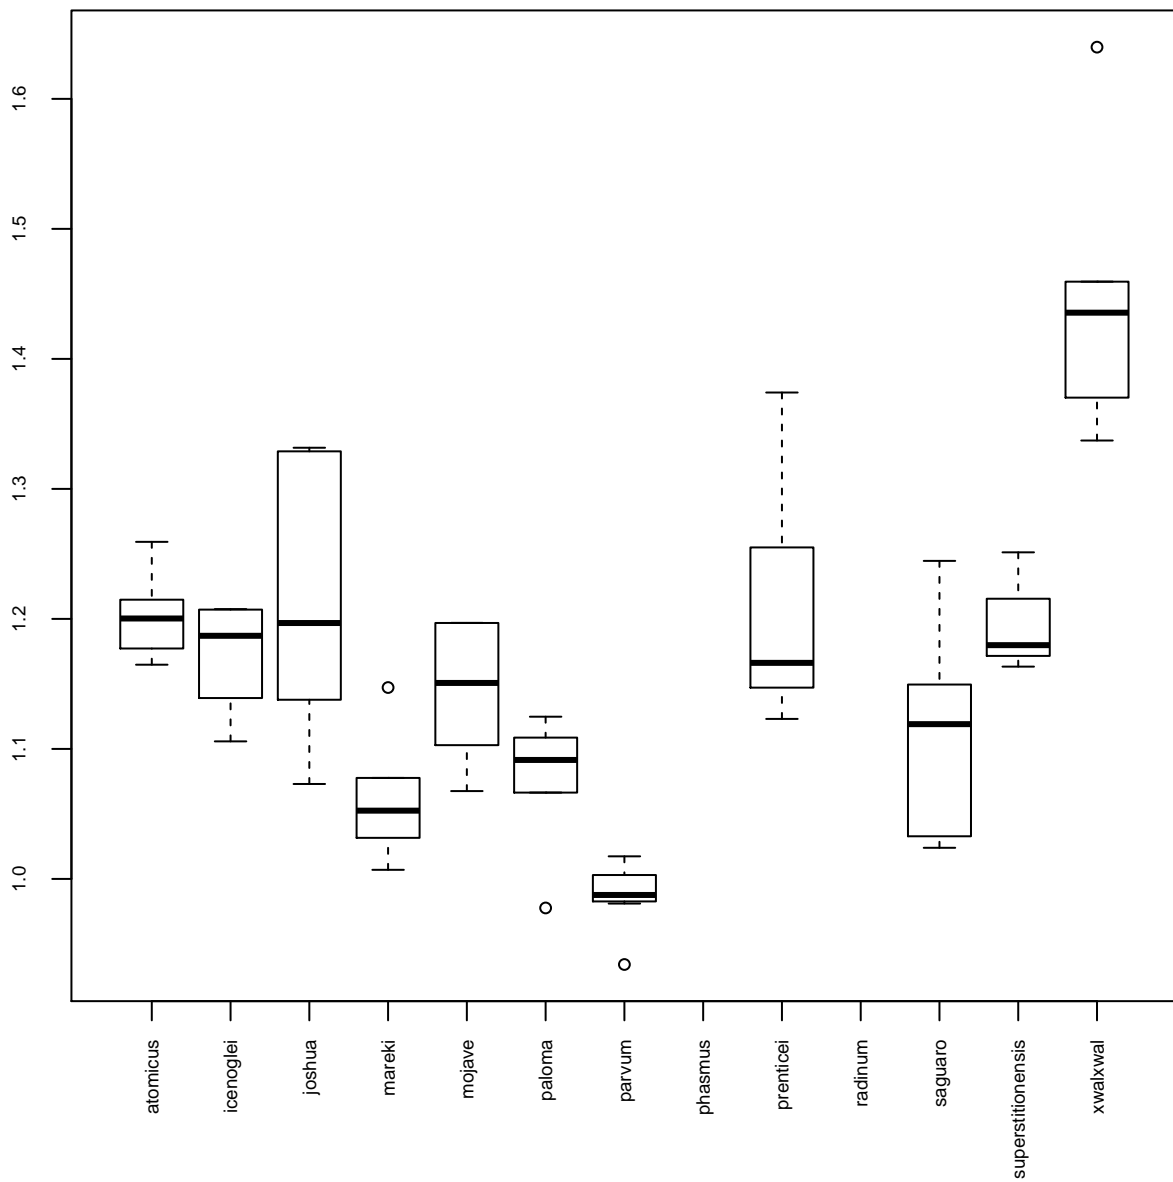

Supplement: Supplementary file 1396

## Patella 1/Patella 3 ratio – males

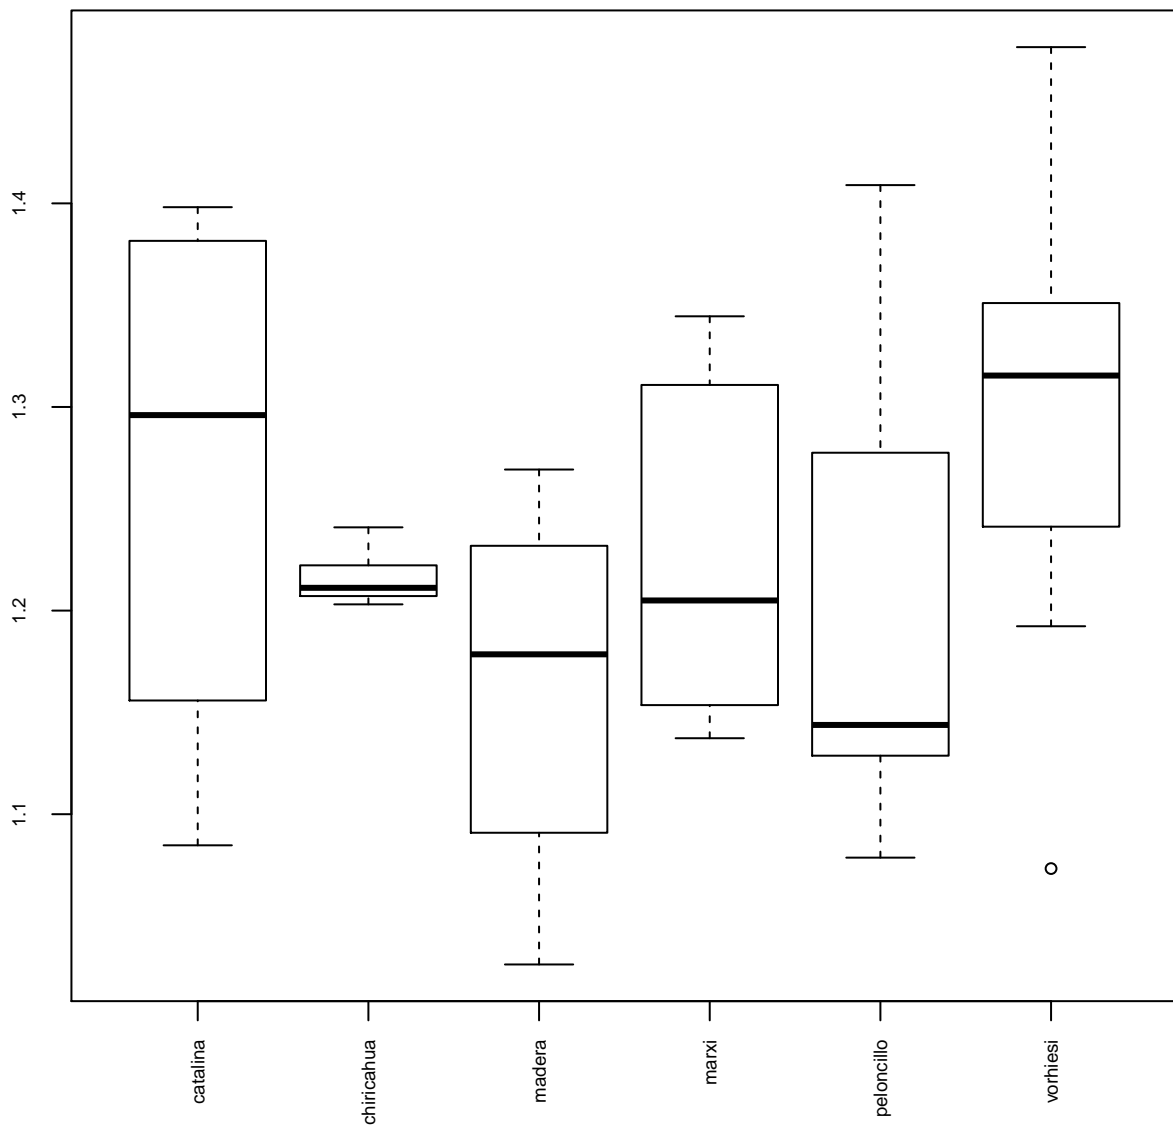

Supplement: Supplementary file 1397

## Carapace Length/Femur 4 ratio – females

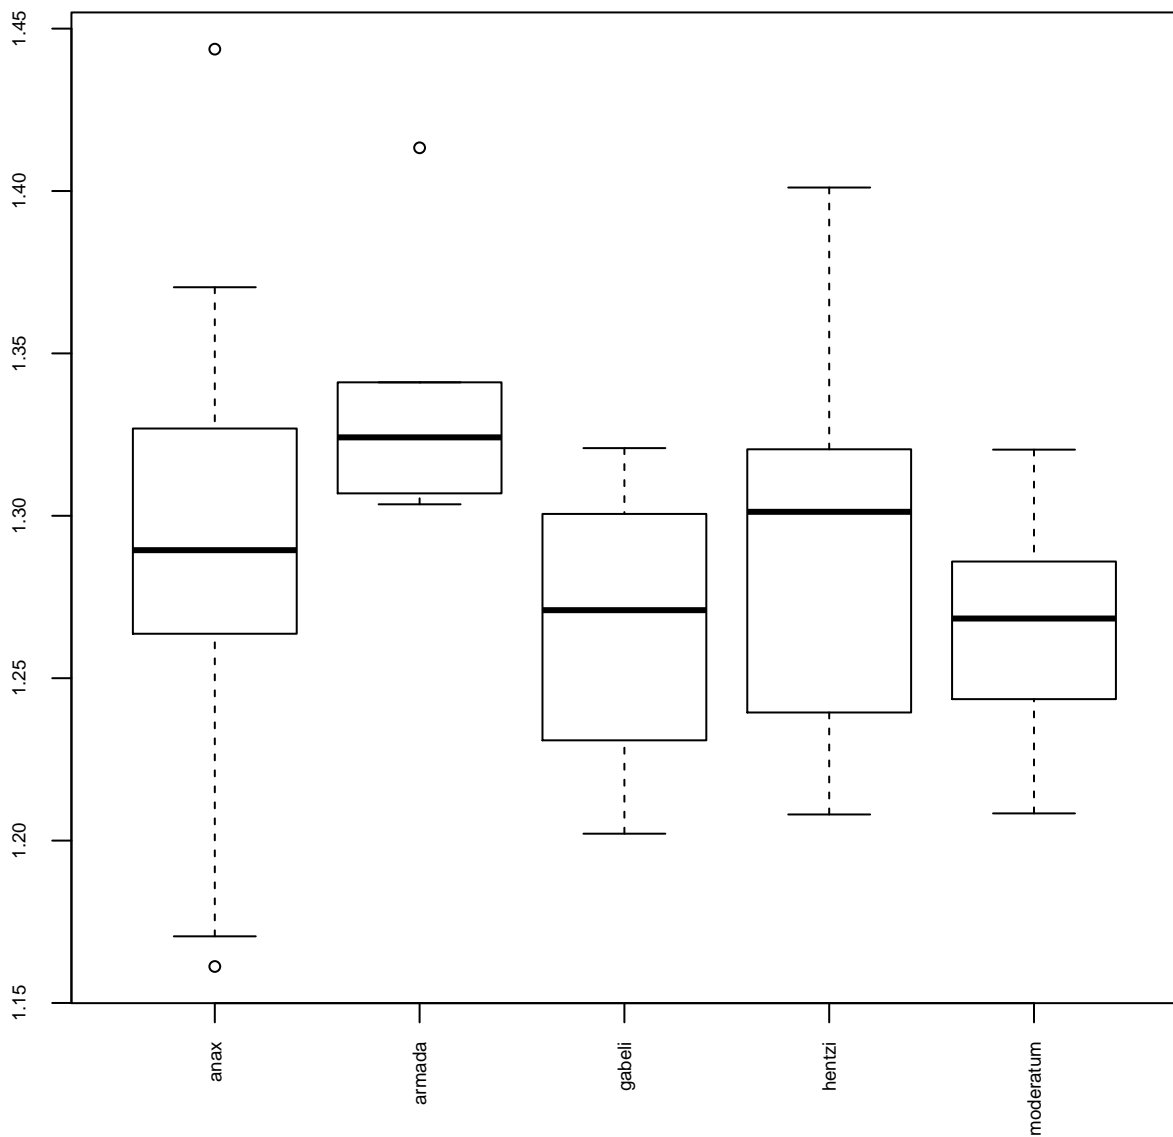

Supplement: Supplementary file 1398

## Metatarsus 3/Metatarsus 4 ratio – males

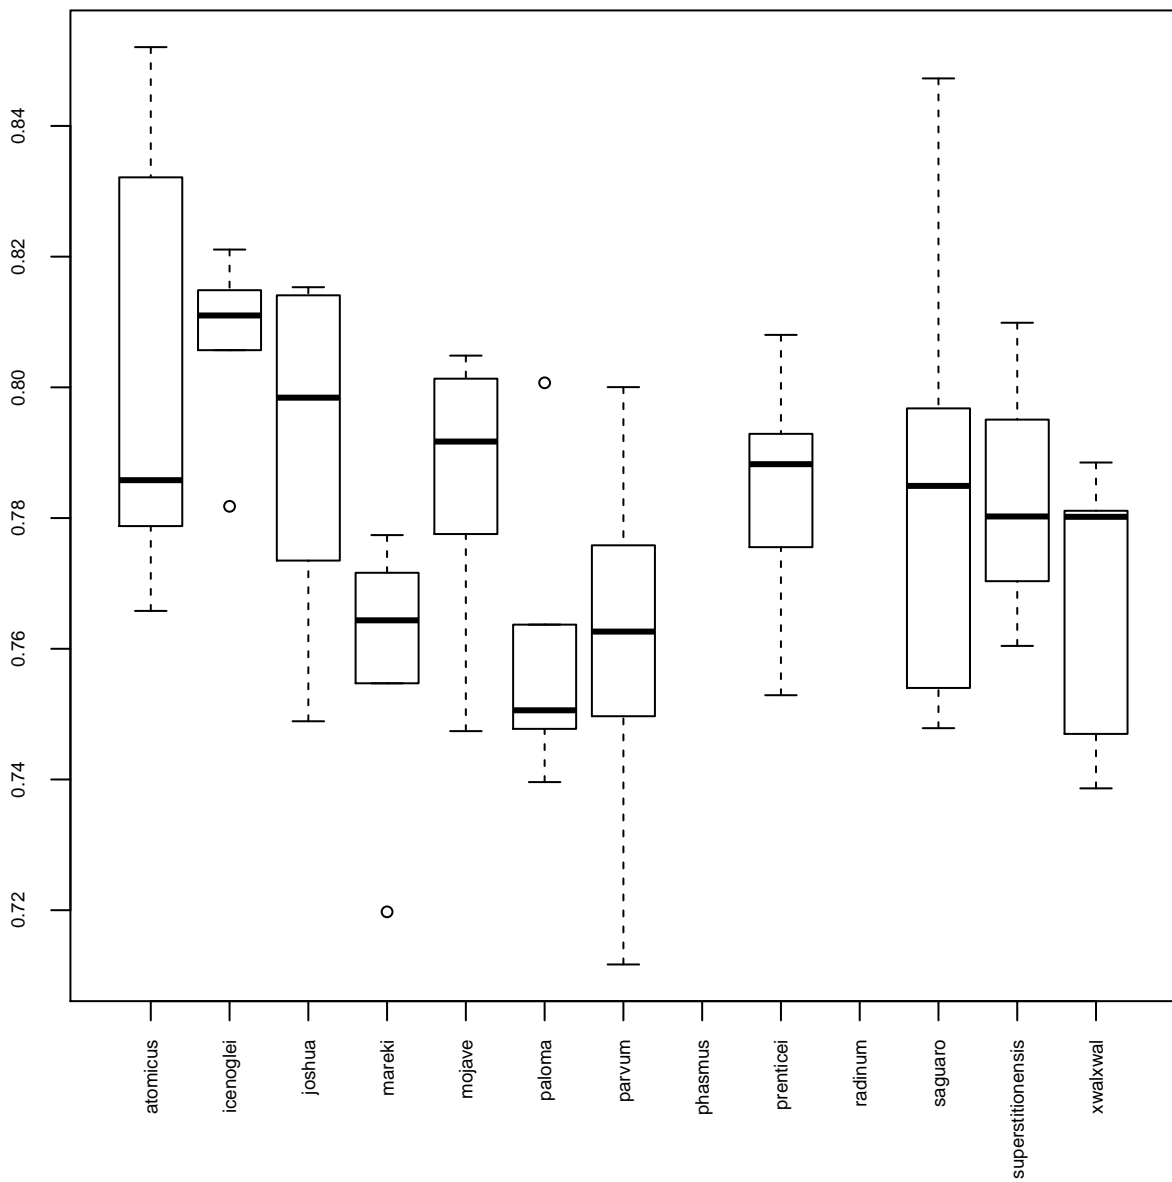

Supplement: Supplementary file 1399

# Leg 3 Length – males

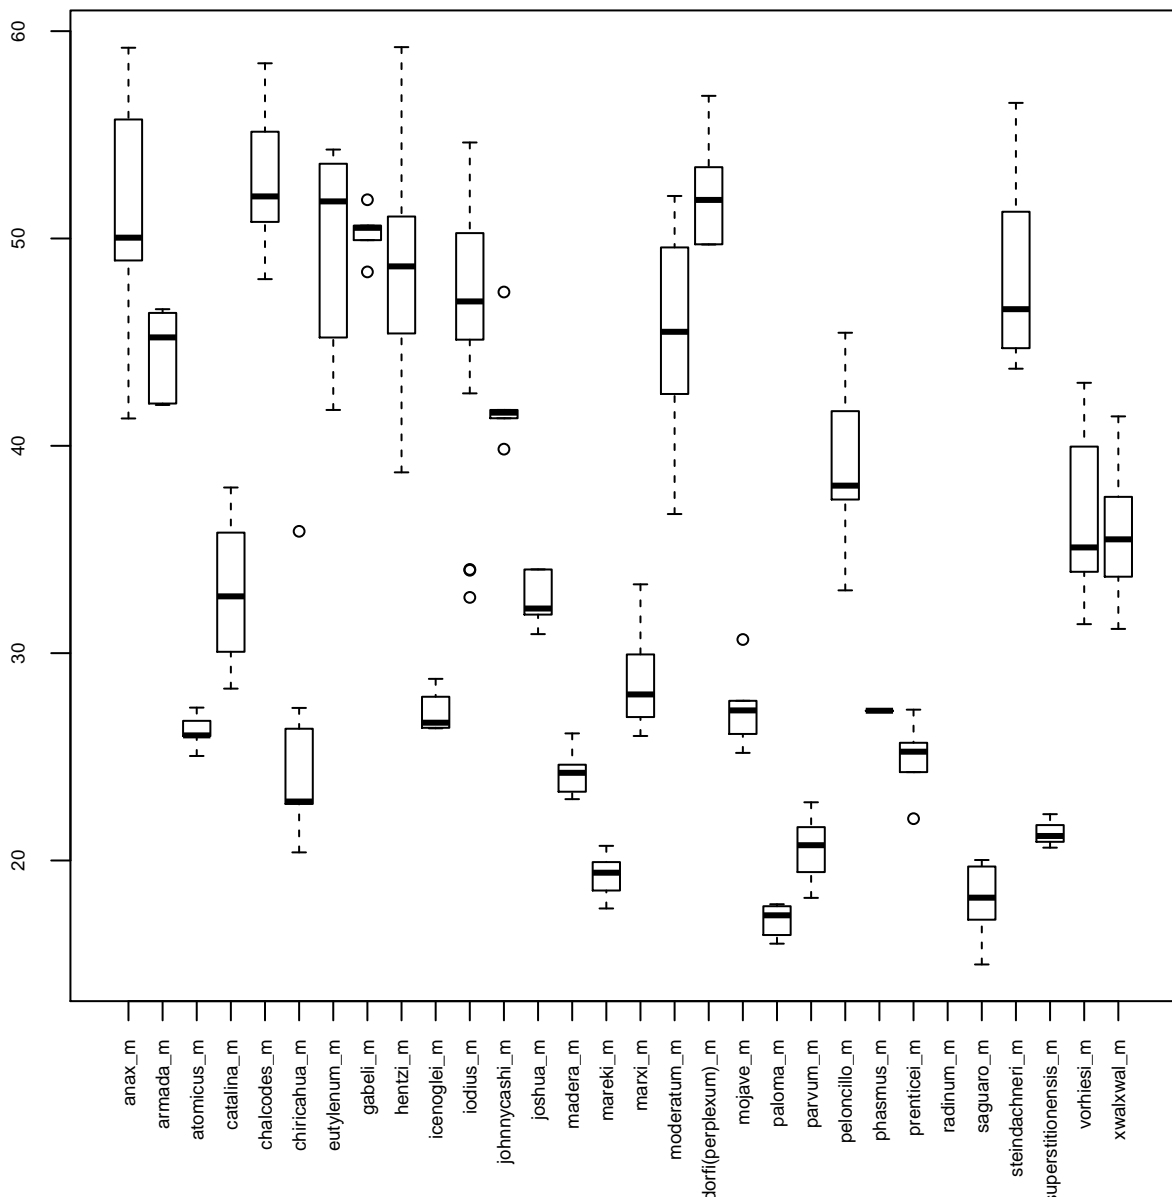

Supplement: Supplementary file 1400
