# Supplementary material (part 15 of 15)
Source: publisher site journal article supplement (http://zookeys.pensoft.net/article/6264/download/suppl/32/)

## Tibia 1/Tarsus 3 Length ratio – females

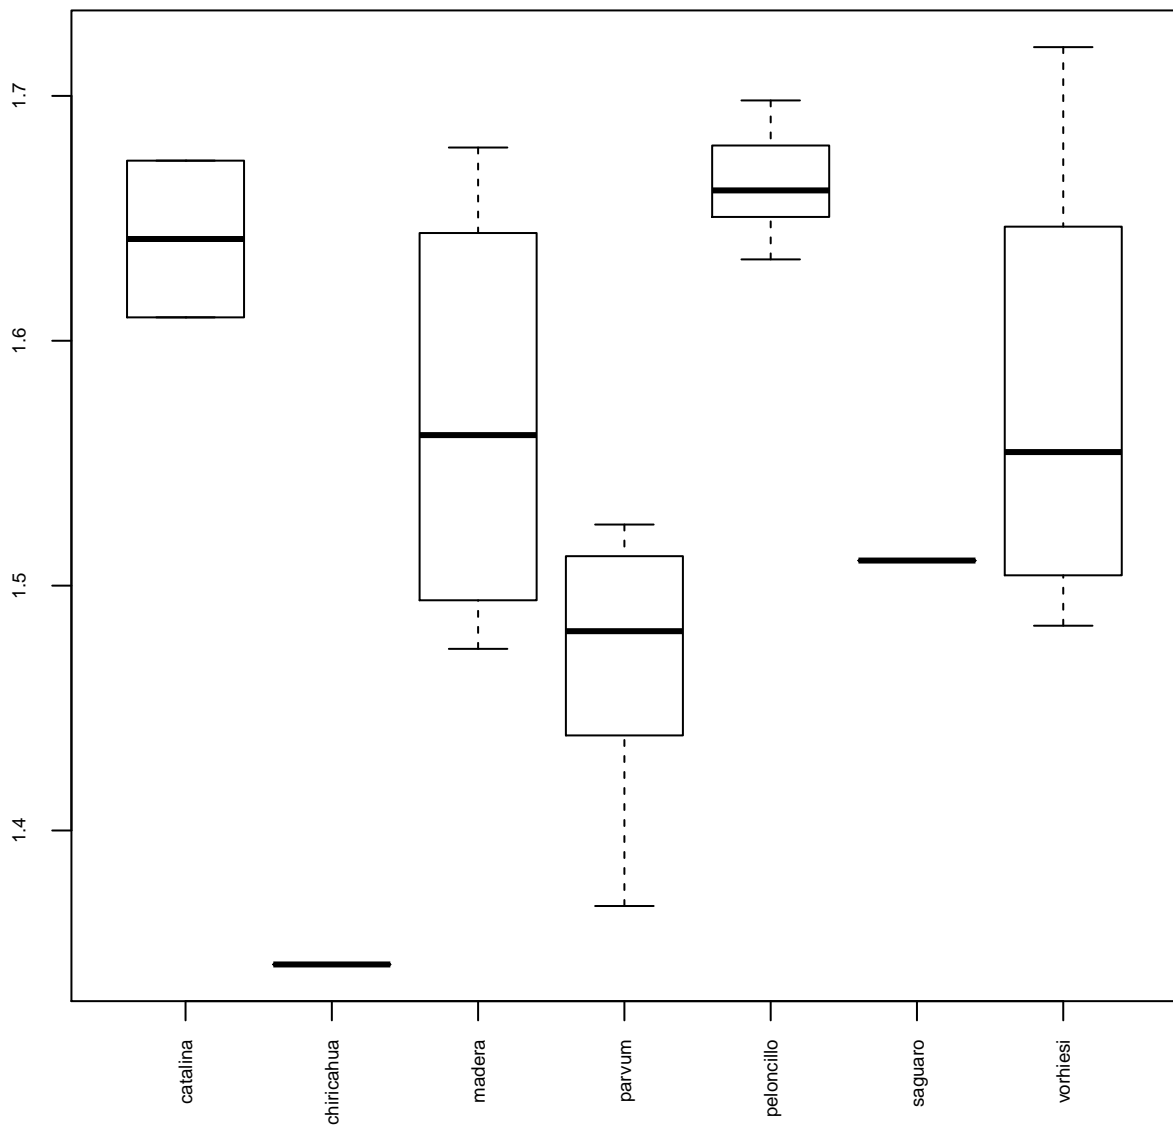

Supplement: Supplementary file 1401

## Patella 3/Tarsus 3 ratio – females

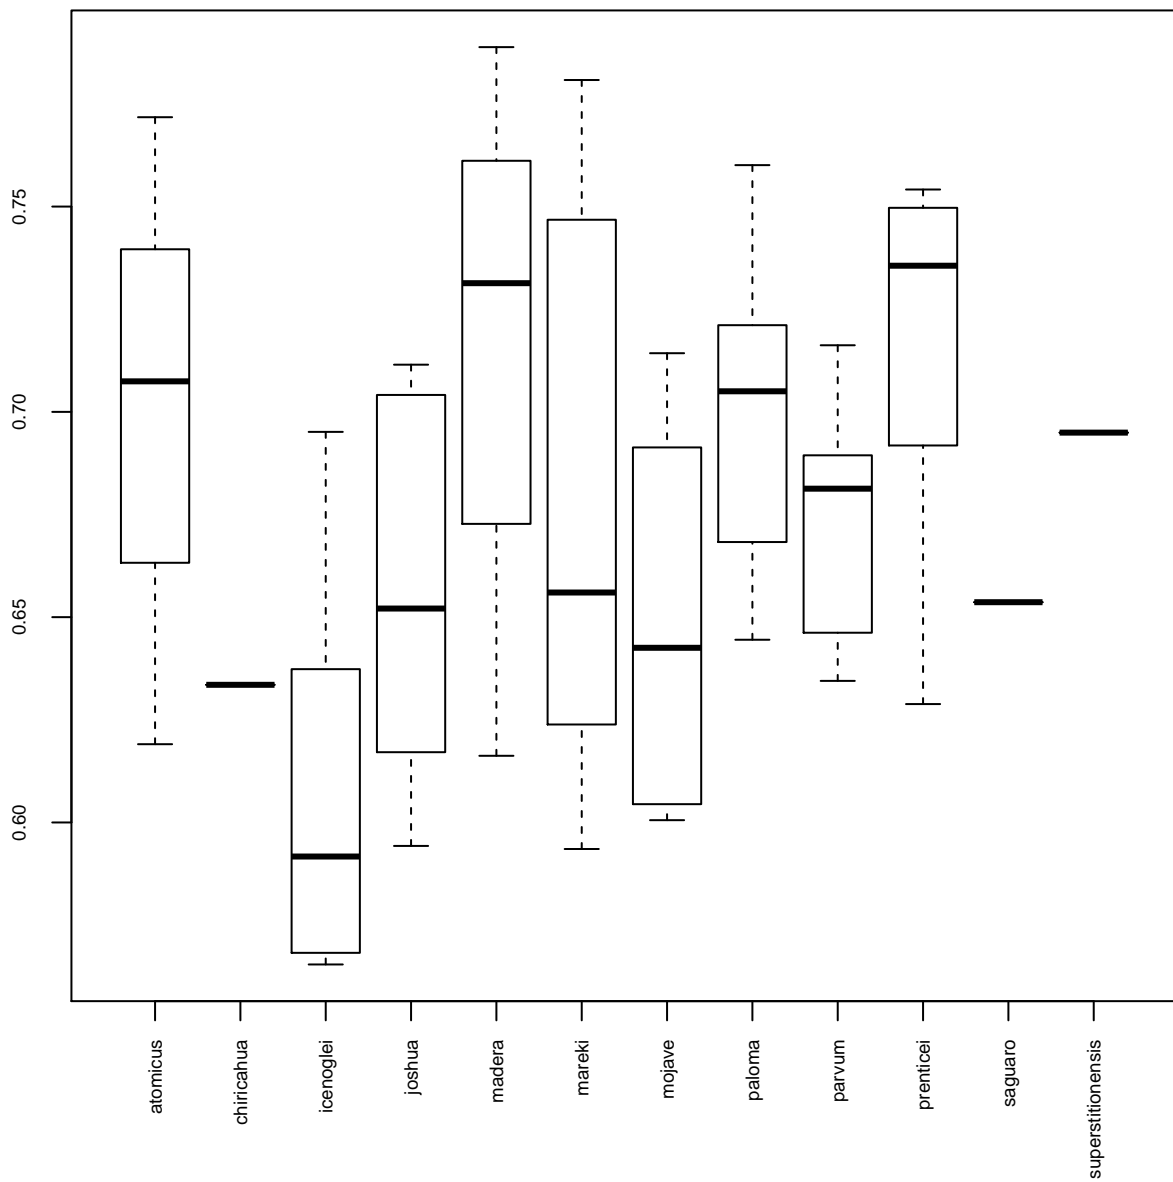

Supplement: Supplementary file 1402

# Carapace Length/Metatarsus 3 ratio – females

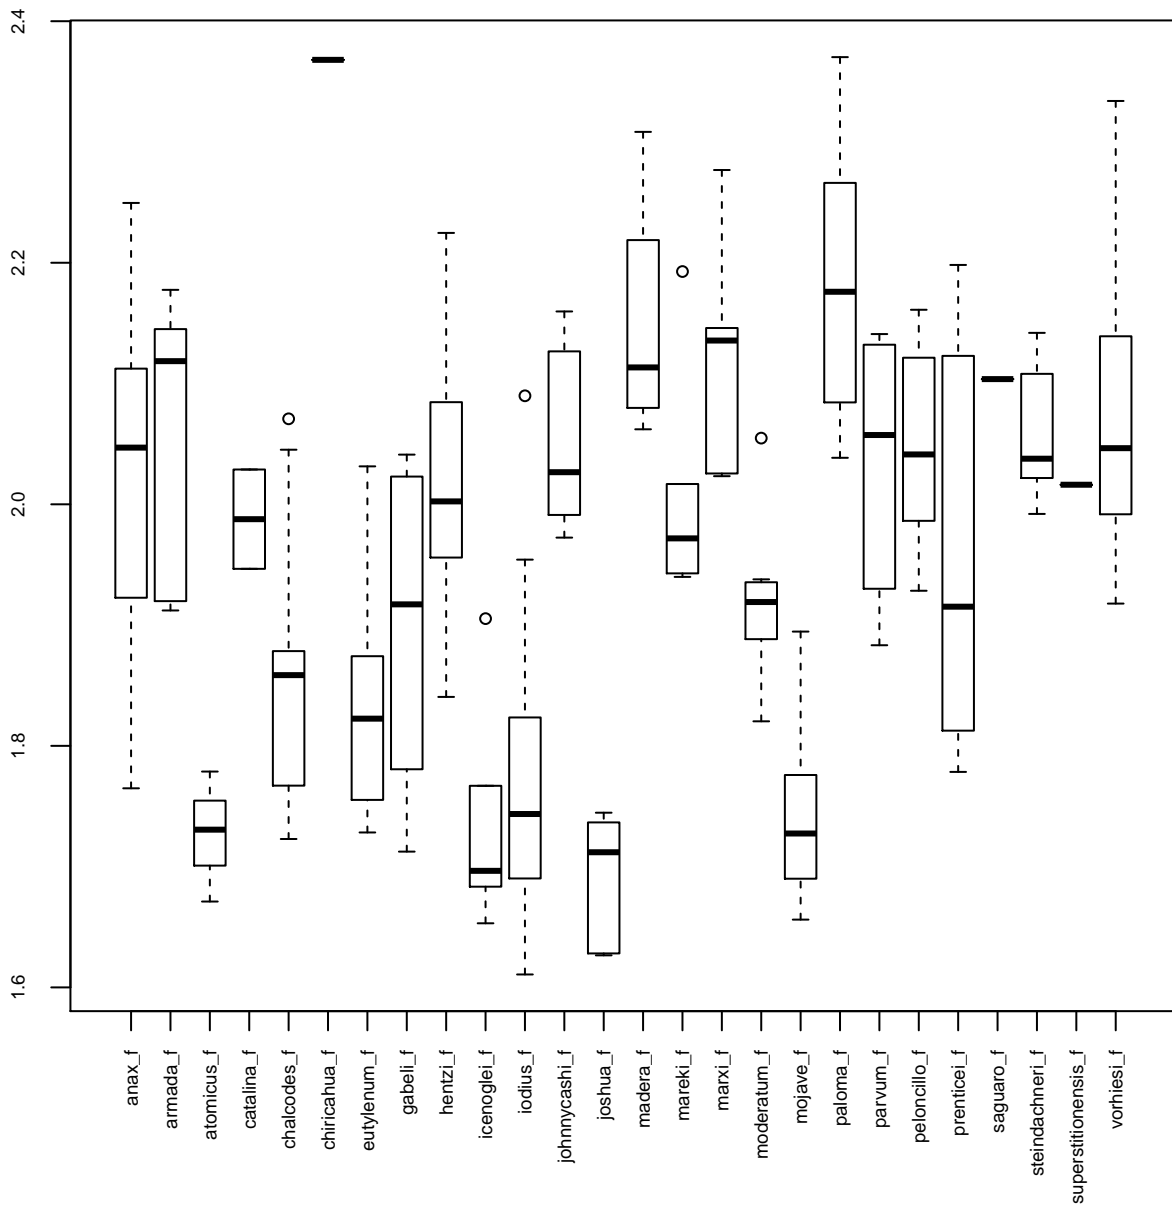

Supplement: Supplementary file 1403

## Carapace Length/Femur 4 ratio – females

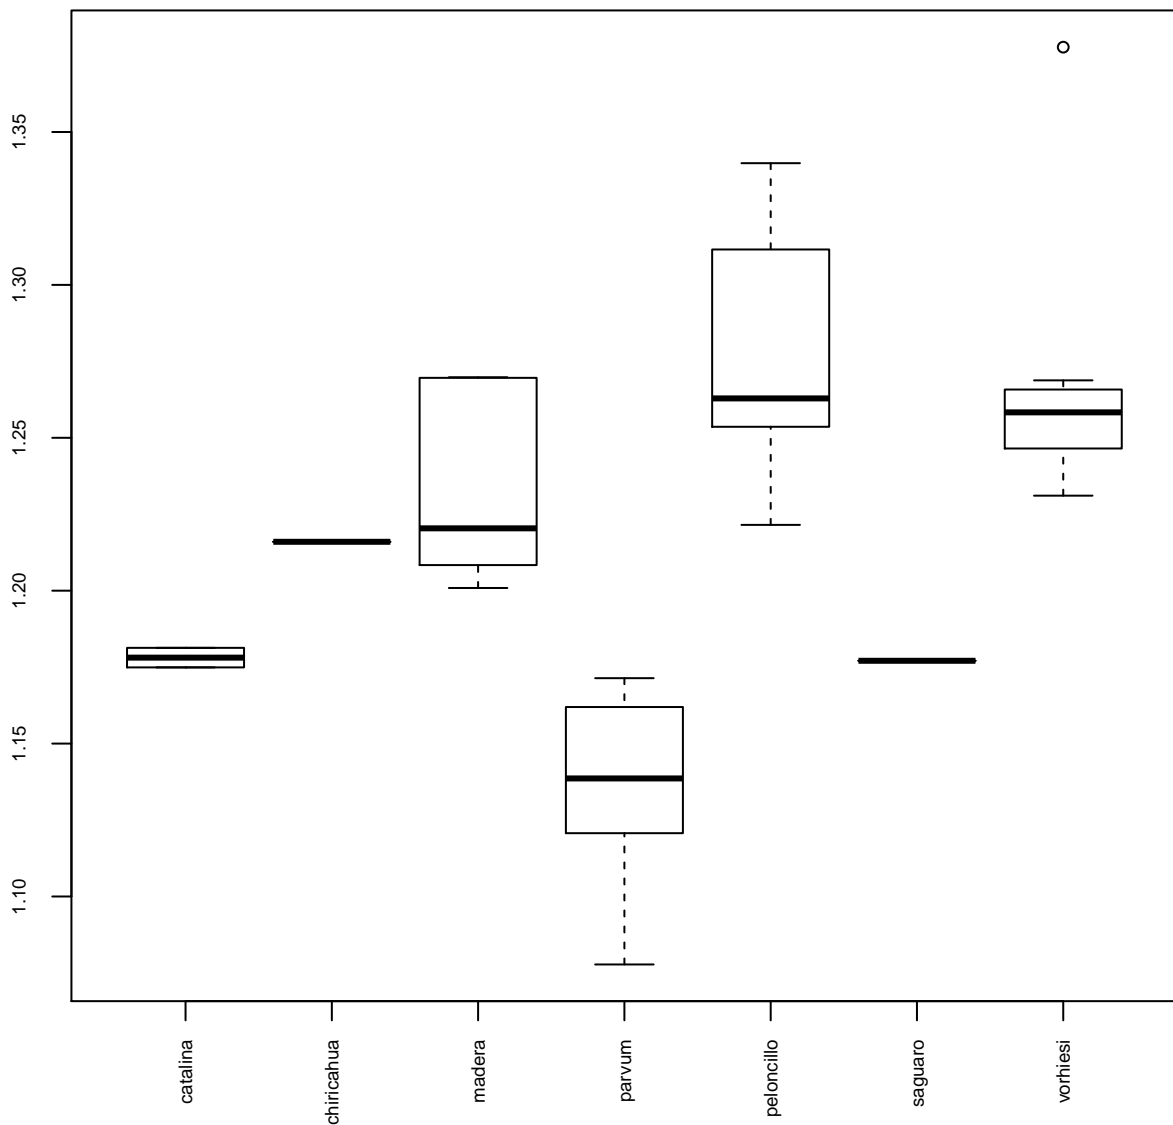

Supplement: Supplementary file 1404

Carapace Length/Patella 1 ratio – females

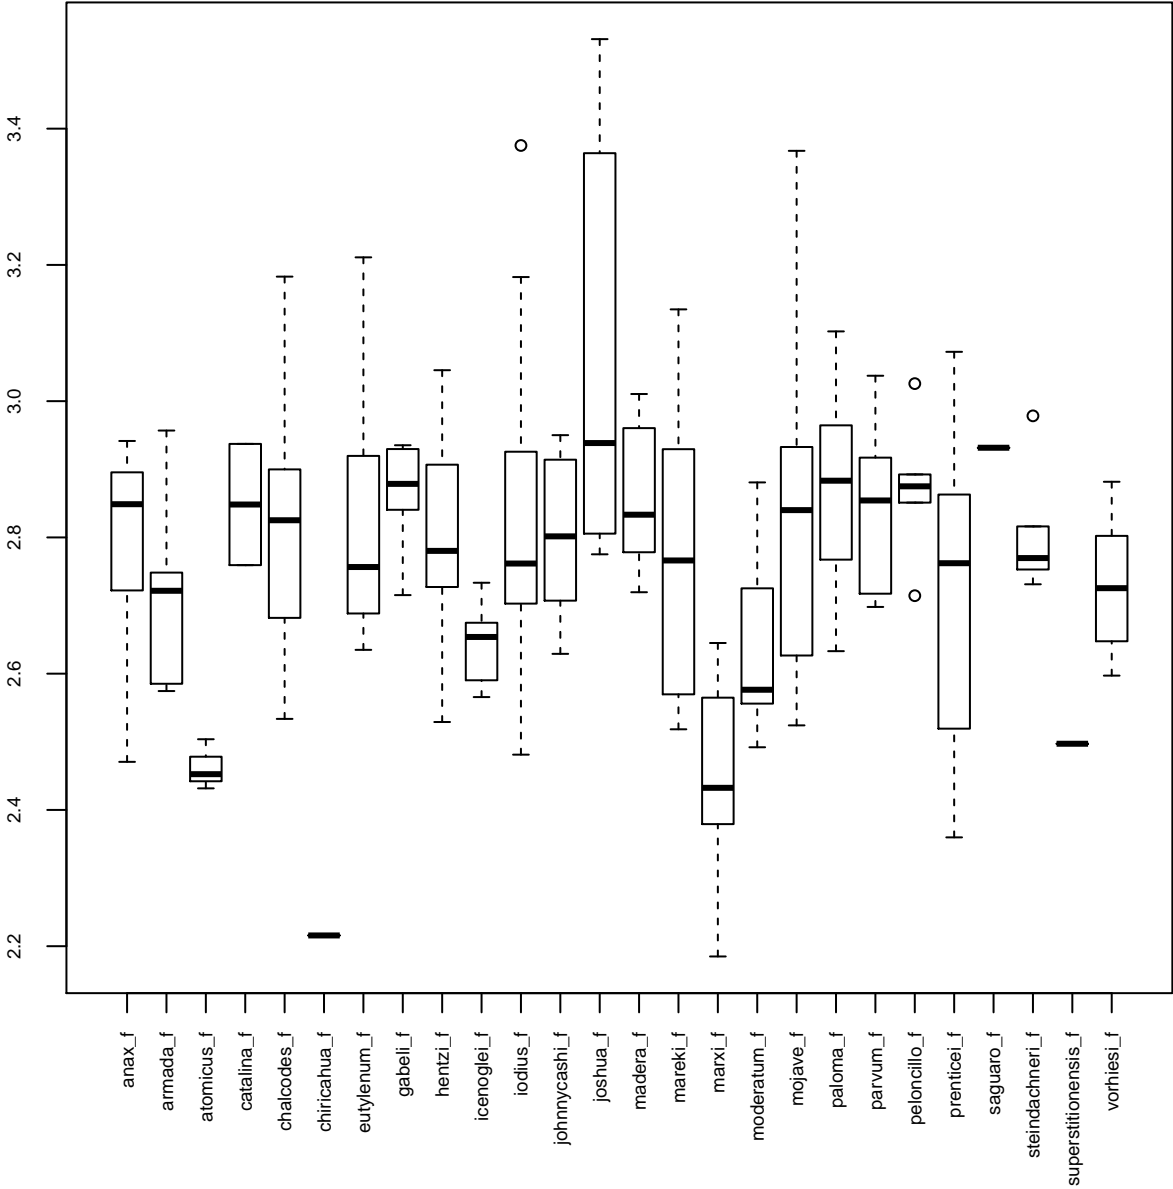

Supplement: Supplementary file 1405

## Metatarsus 1/Femur 4 Length ratio – females

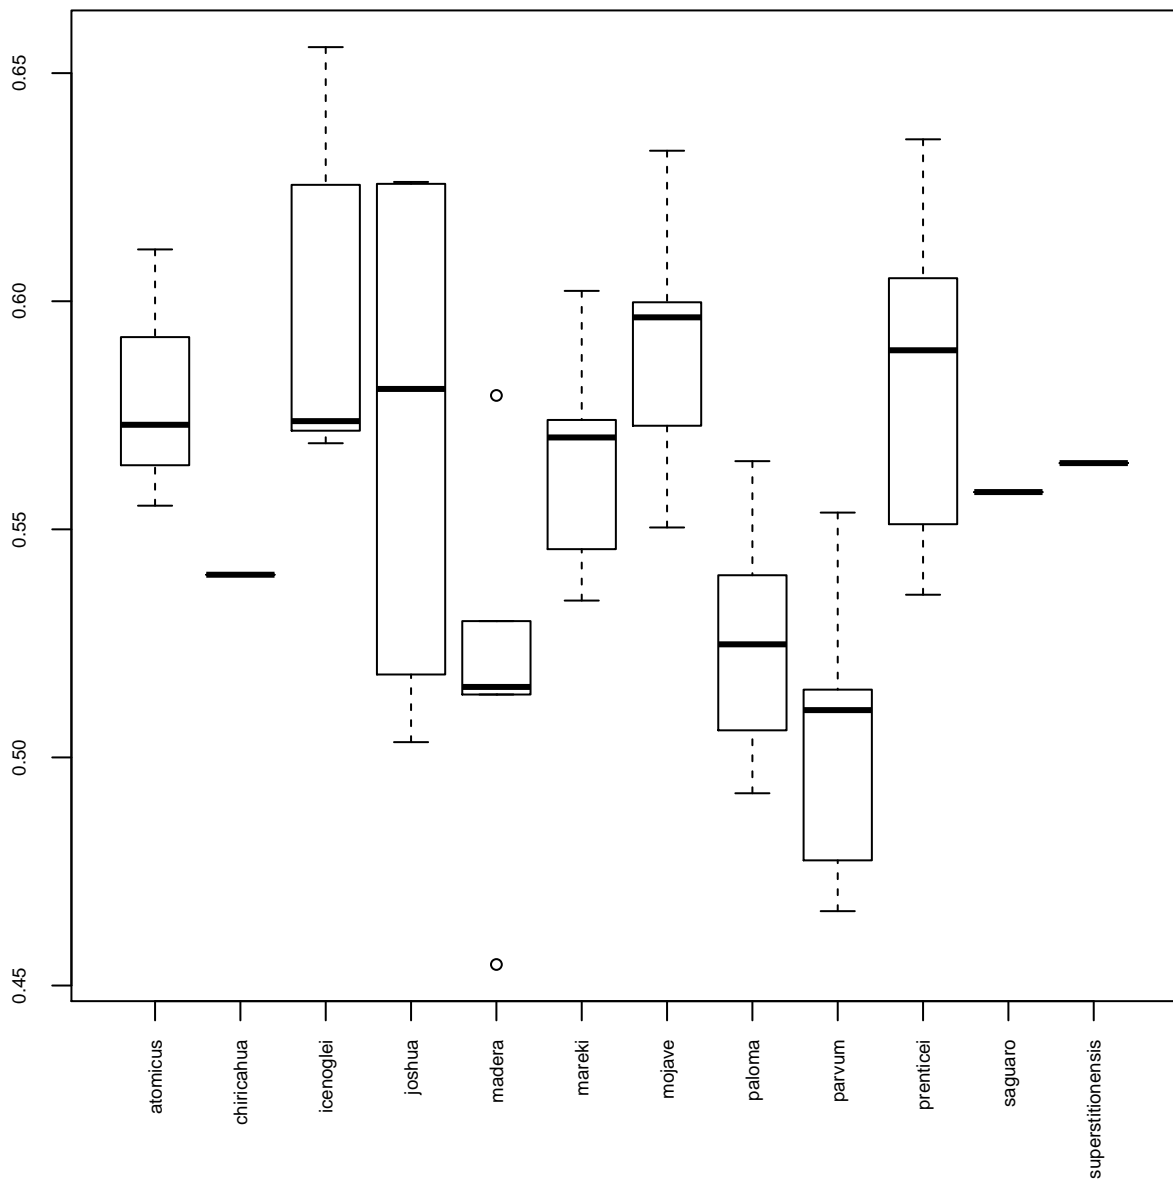

Supplement: Supplementary file 1406

## Carapace Length/Tibia 1 ratio – males

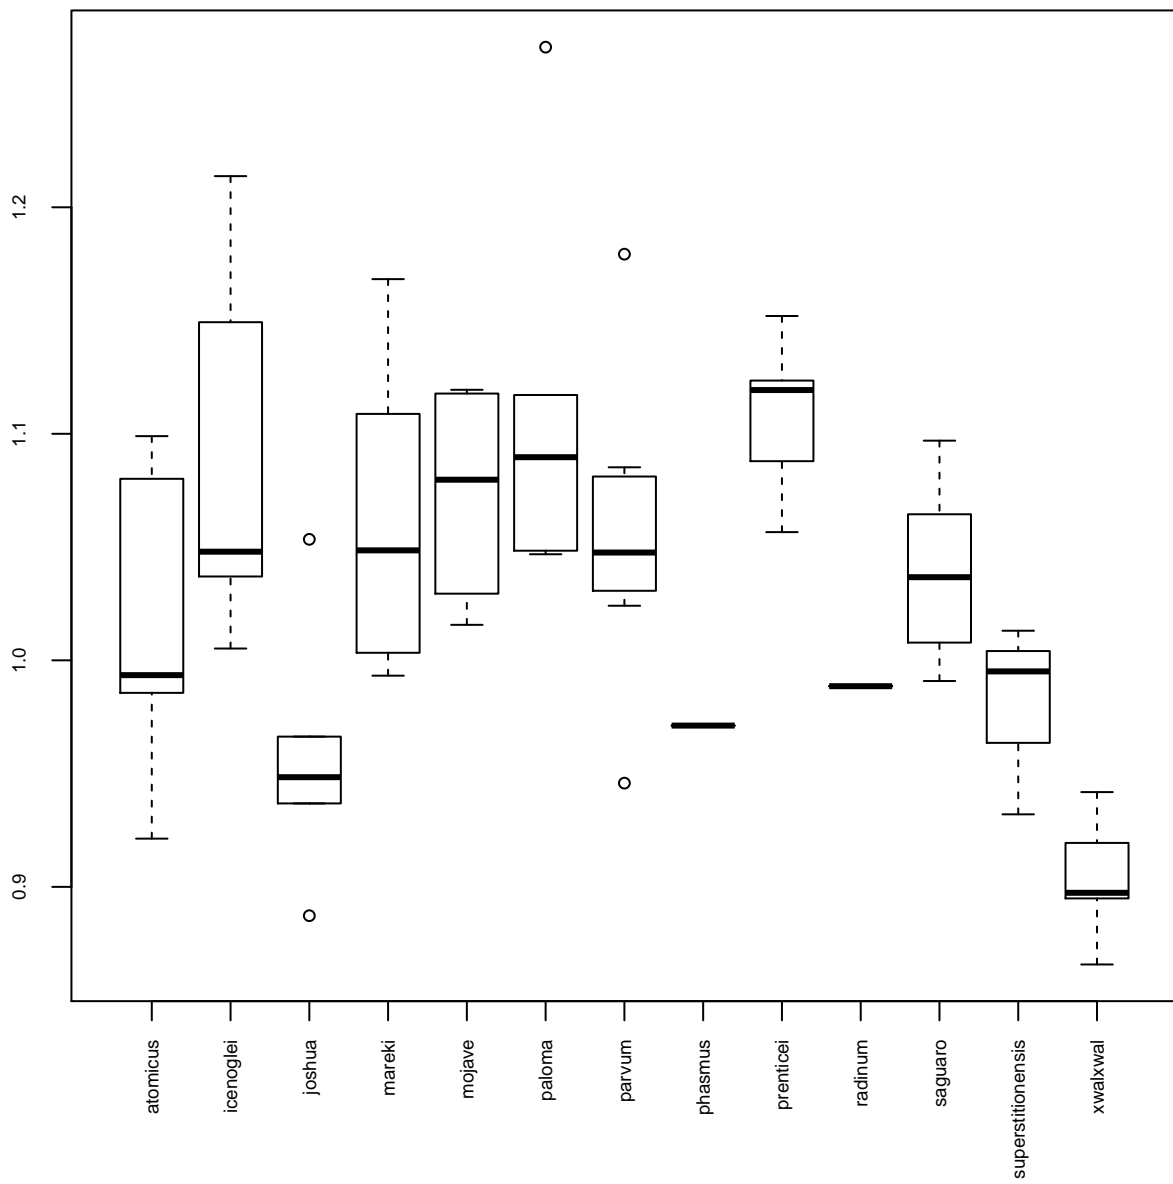

Supplement: Supplementary file 1407

## Tibia 3/Metatarsus 4 Length ratio – females

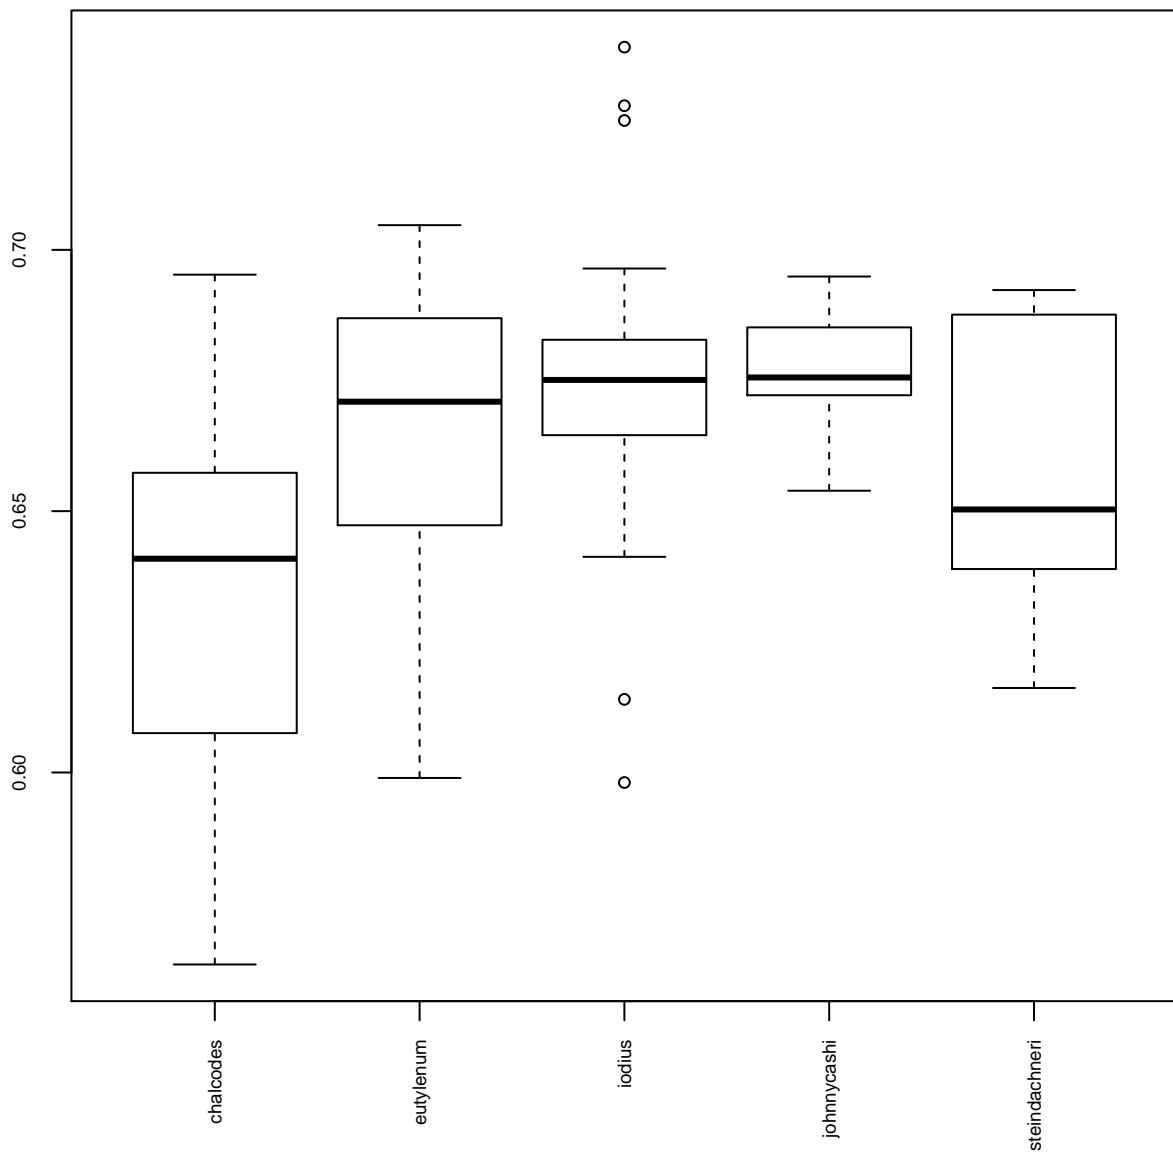

Supplement: Supplementary file 1408

## Patella 3/Tarsus 3 ratio – females

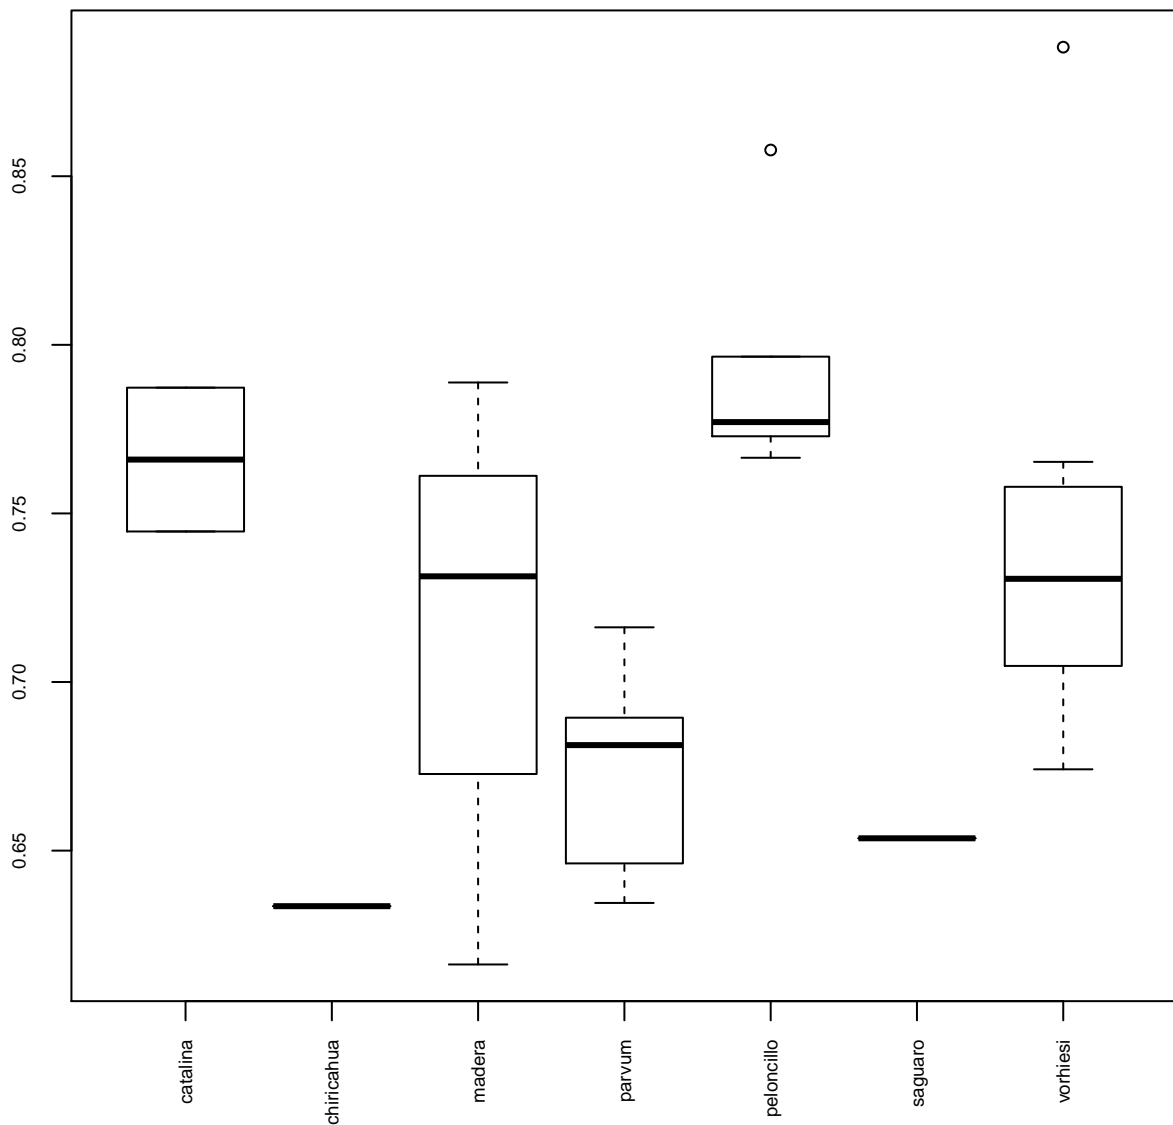

Supplement: Supplementary file 1409

# Leg 1 Length – females

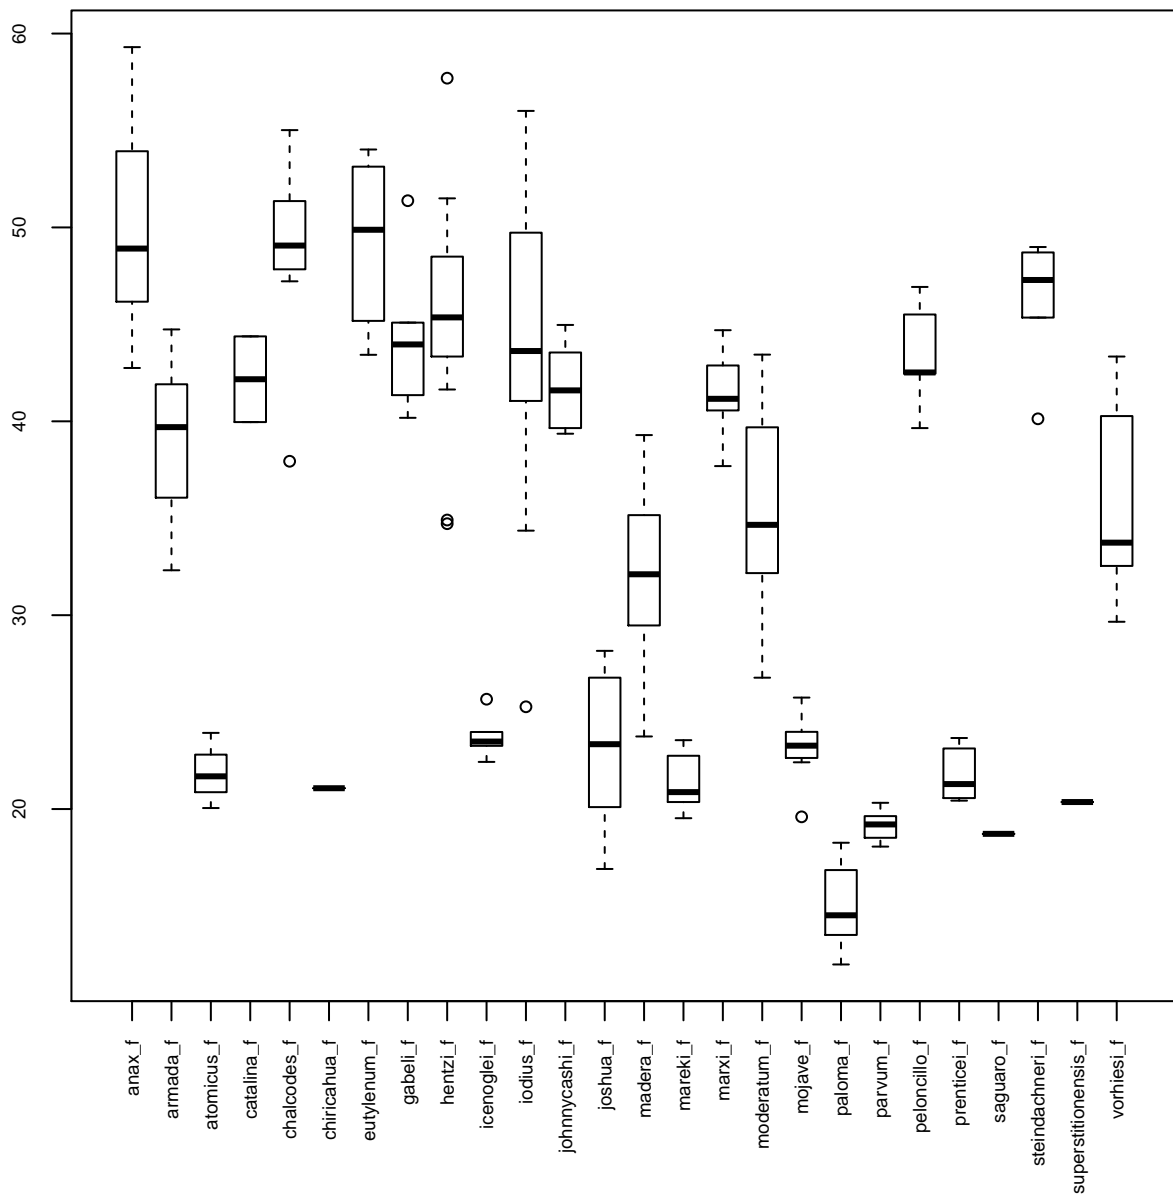

Supplement: Supplementary file 1410

## Patella 3/Metatarsus 3 ratio – males

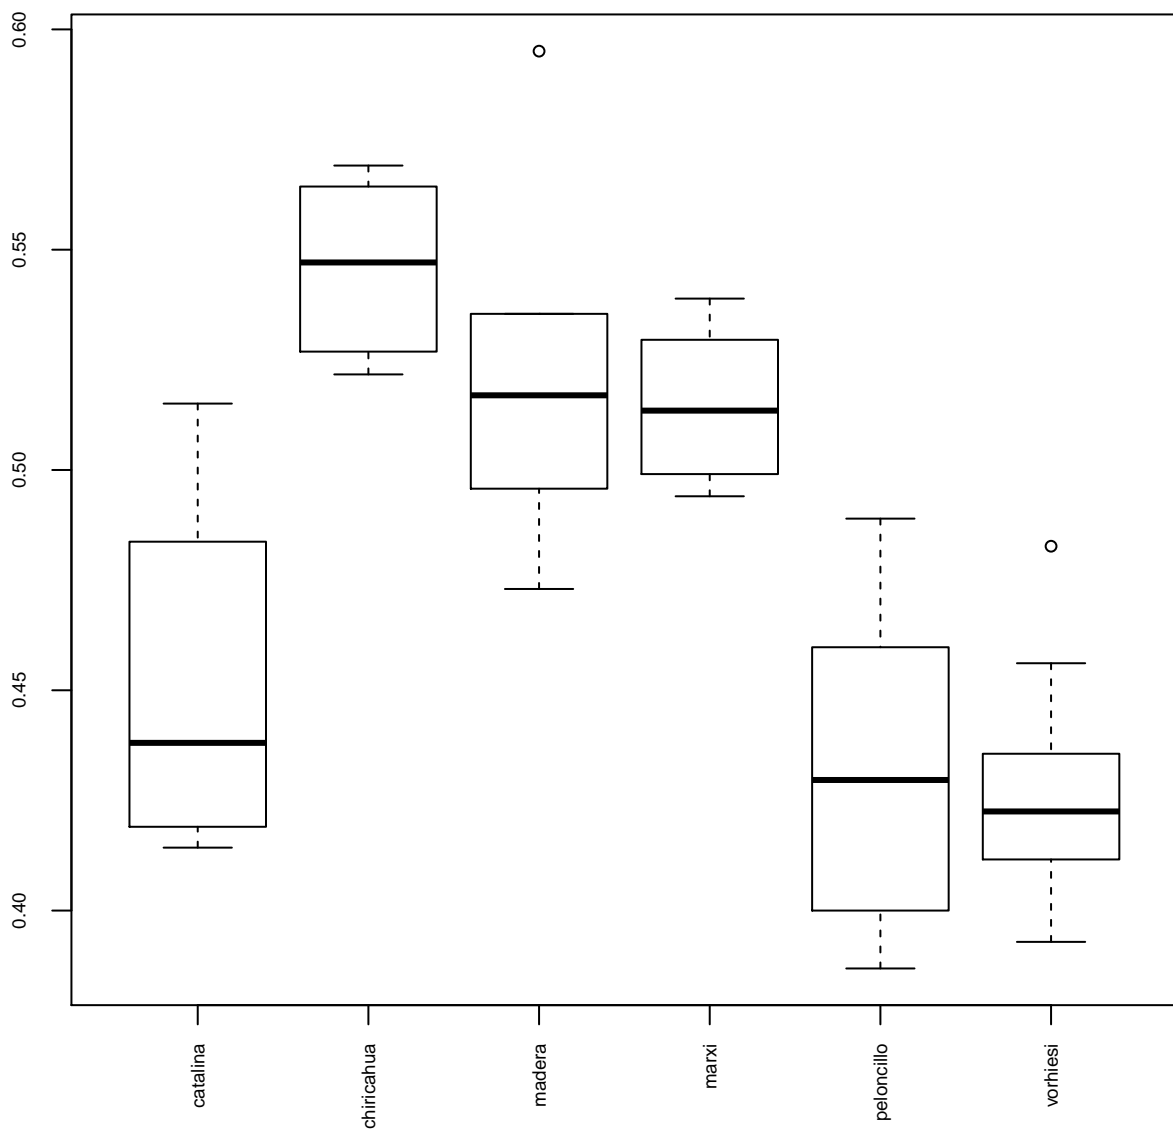

Supplement: Supplementary file 1411

## Tibia 3/Tibia 4 ratio – males

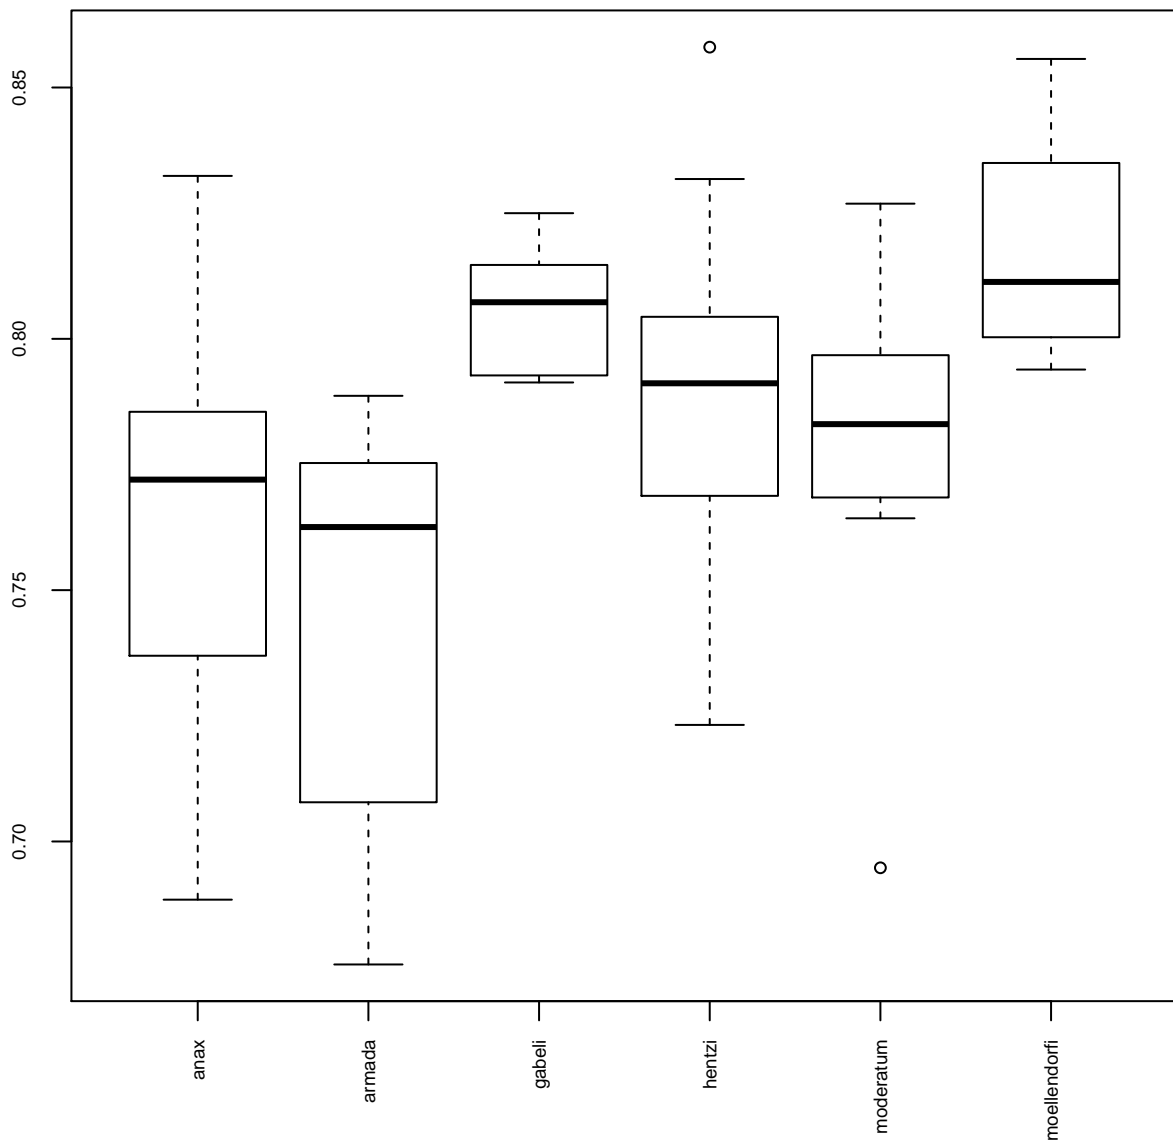

Supplement: Supplementary file 1412

## Patella 1/Tibia 3 Length ratio – females

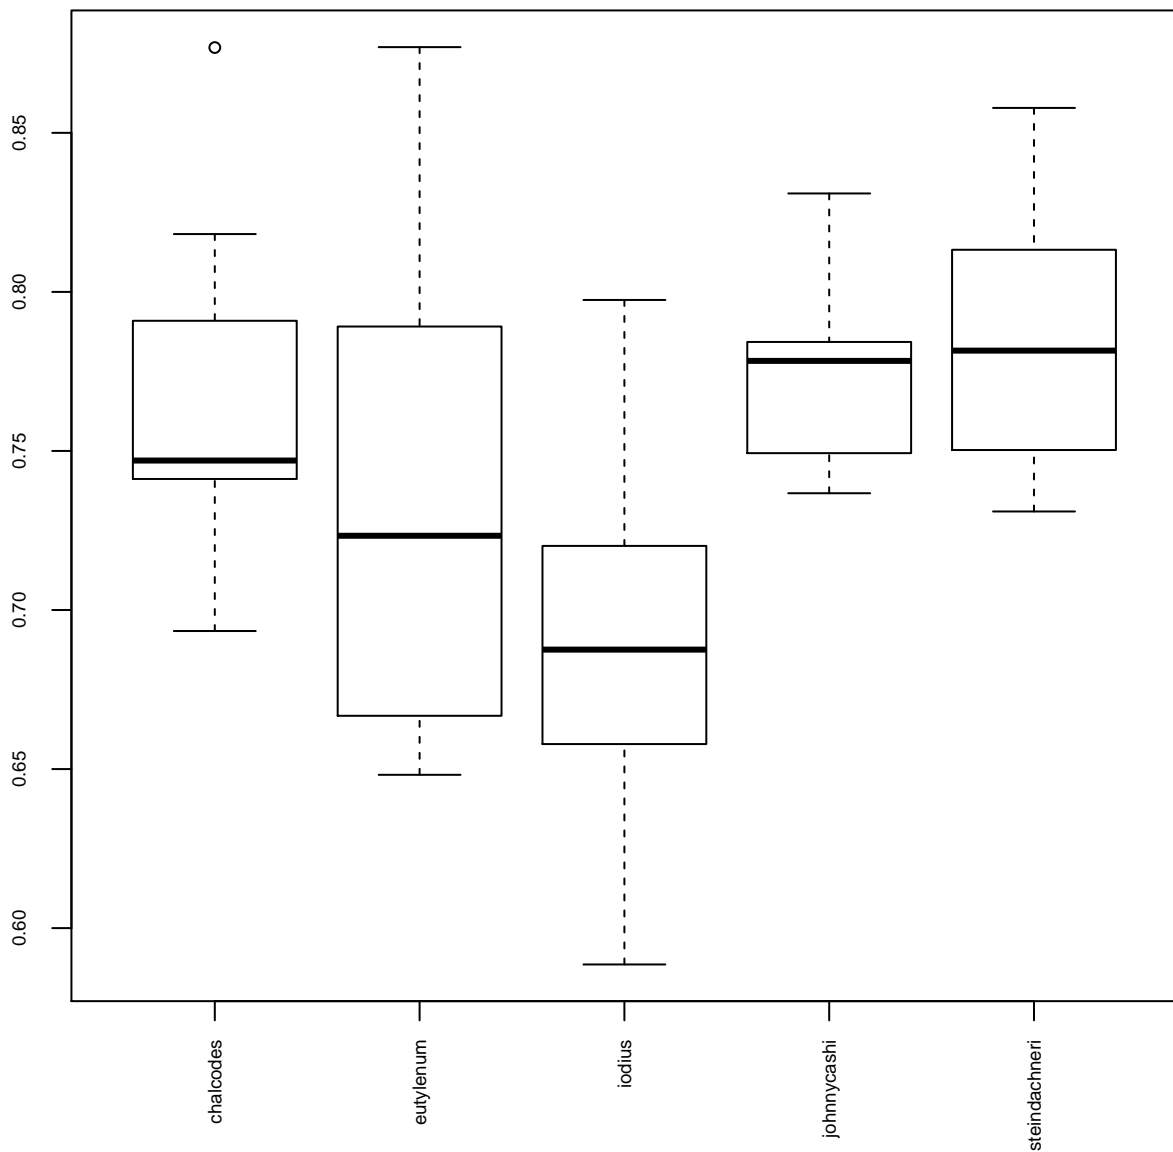

Supplement: Supplementary file 1413

## Tibia 3/Patella 4 Length ratio – males

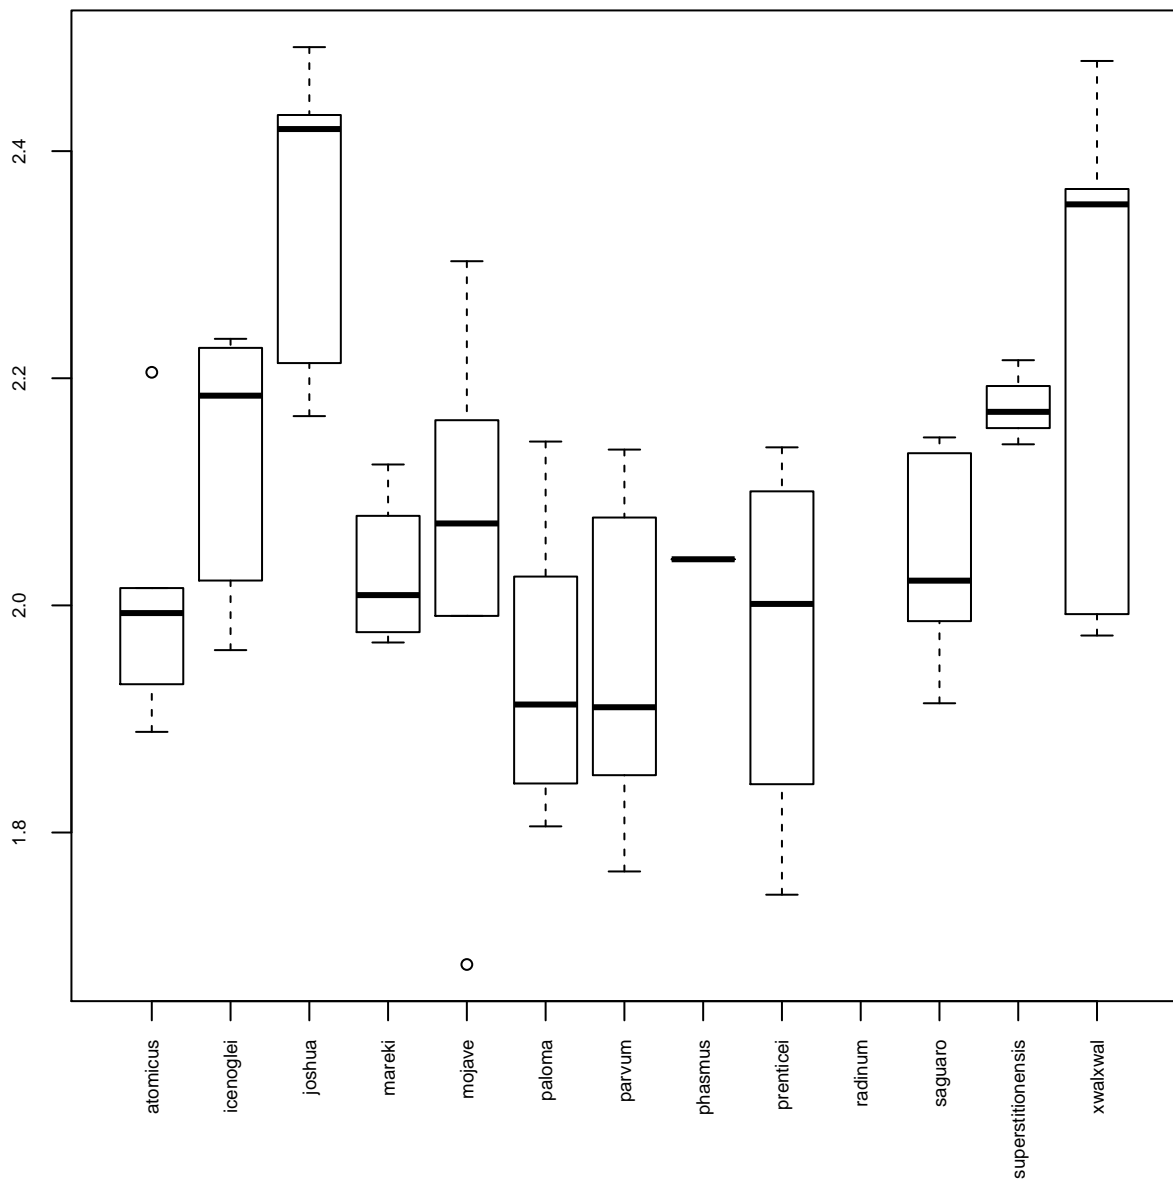

Supplement: Supplementary file 1414

# Femur 1/Tarsus 1 ratio – males

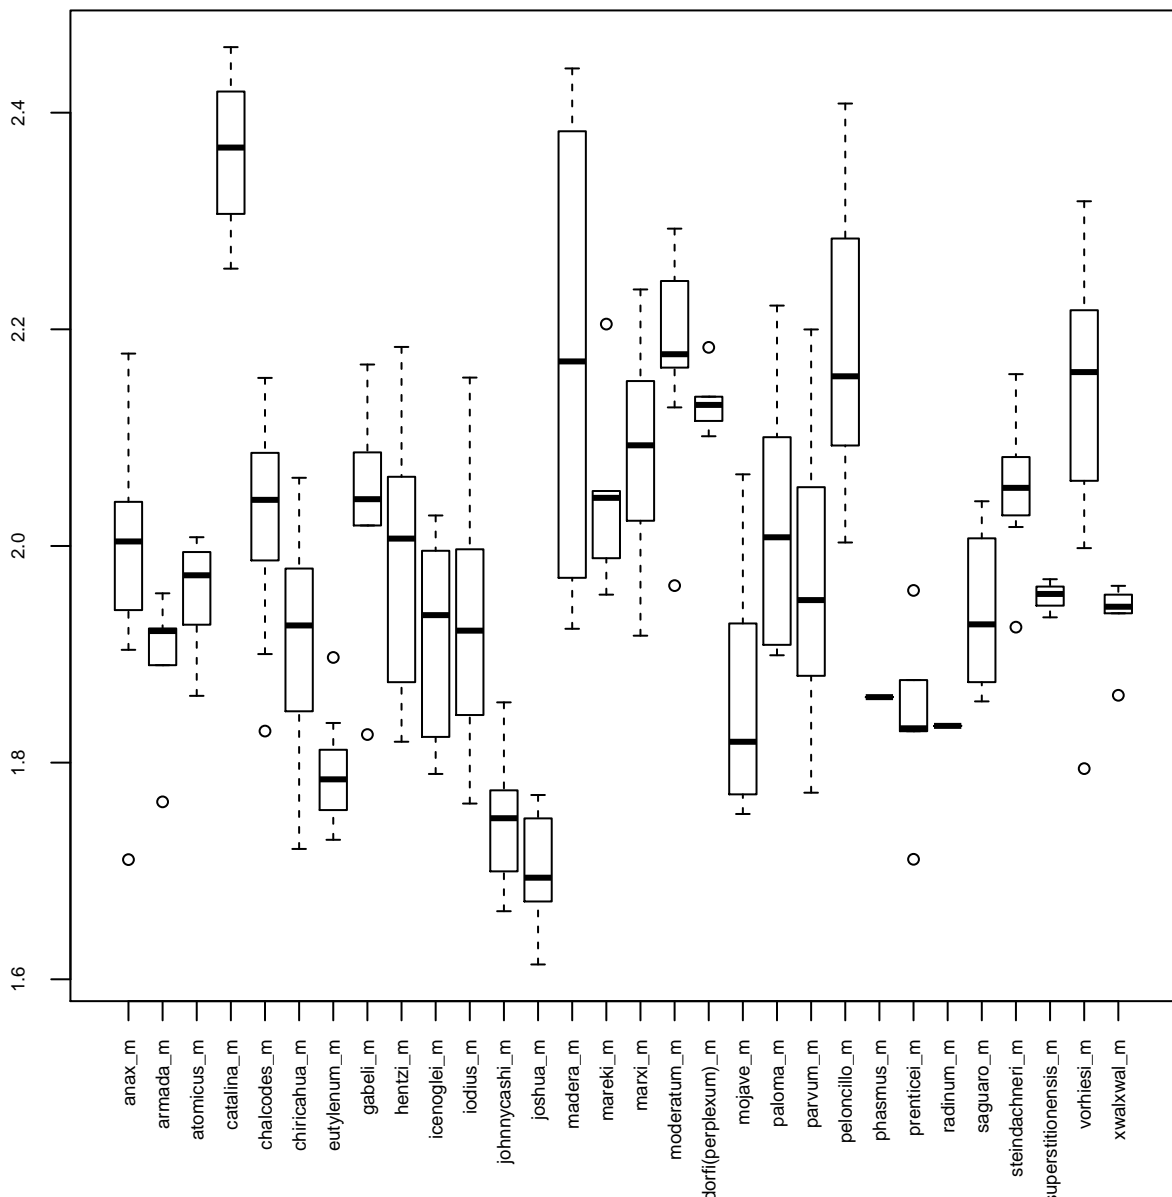

Supplement: Supplementary file 1415

## Carapace Width – males

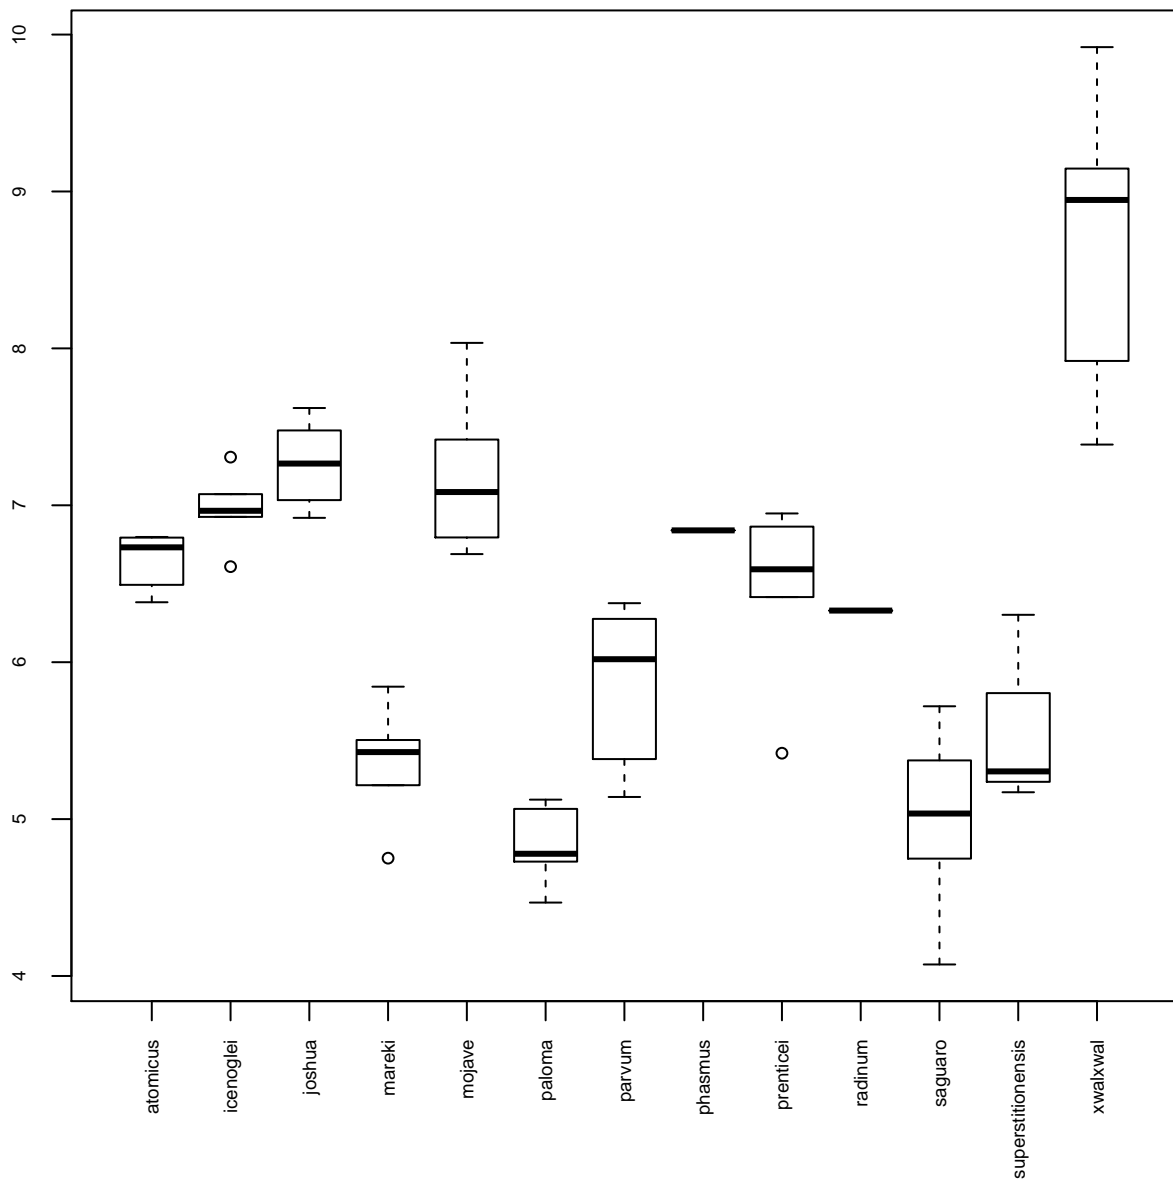

Supplement: Supplementary file 1416

## Metatarsus 3/Metatarsus 4 ratio – males

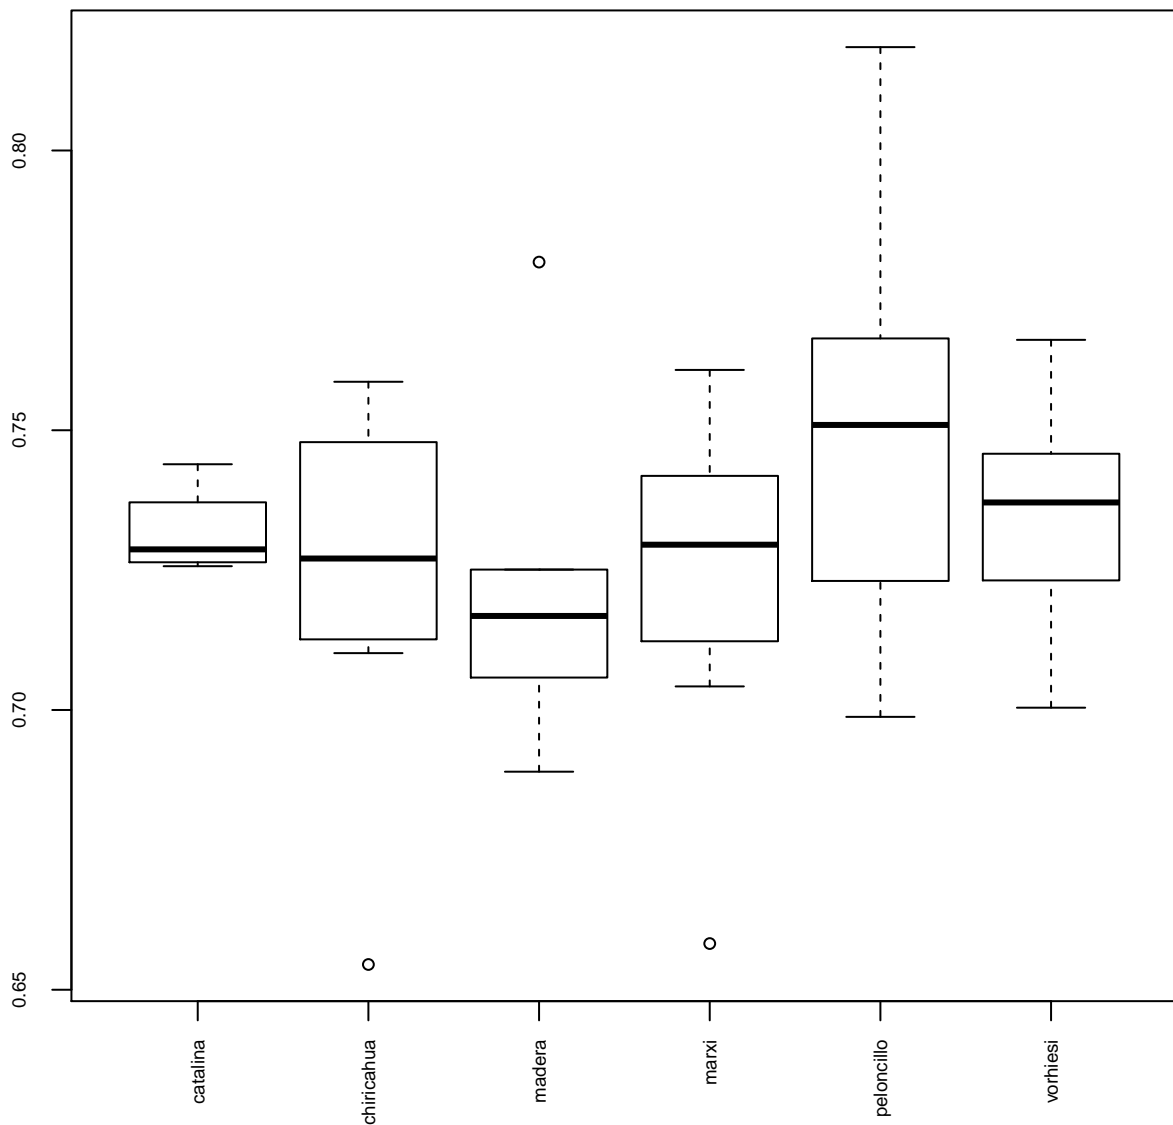

Supplement: Supplementary file 1417

## Tarsus 3/Tarsus 4 ratio – males

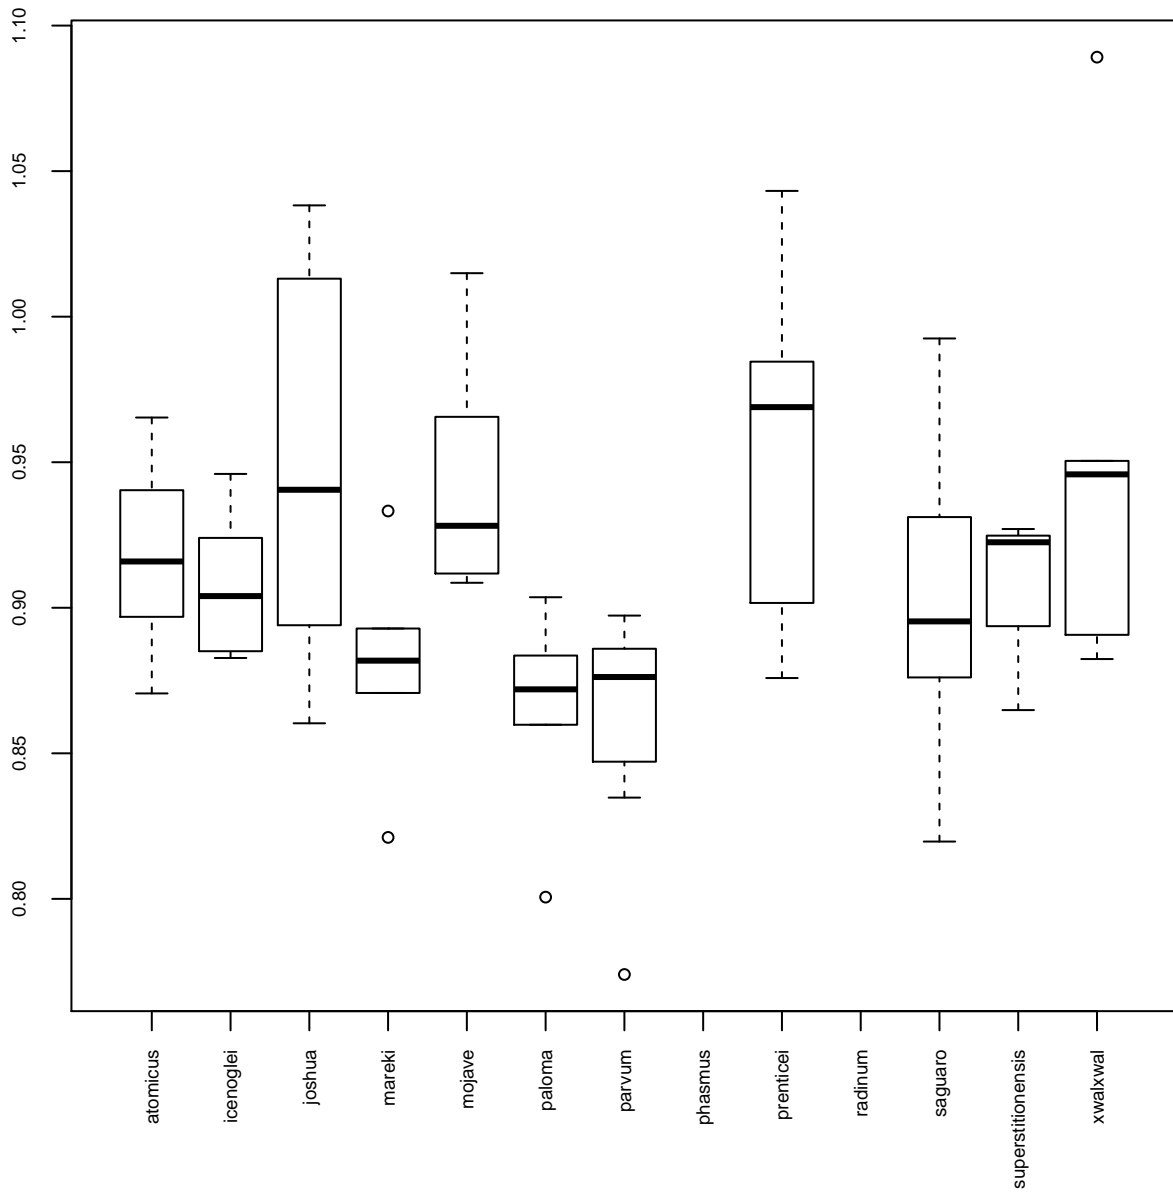

Supplement: Supplementary file 1418

## Palpal Tibia/Metatarsus 4 Length ratio – males

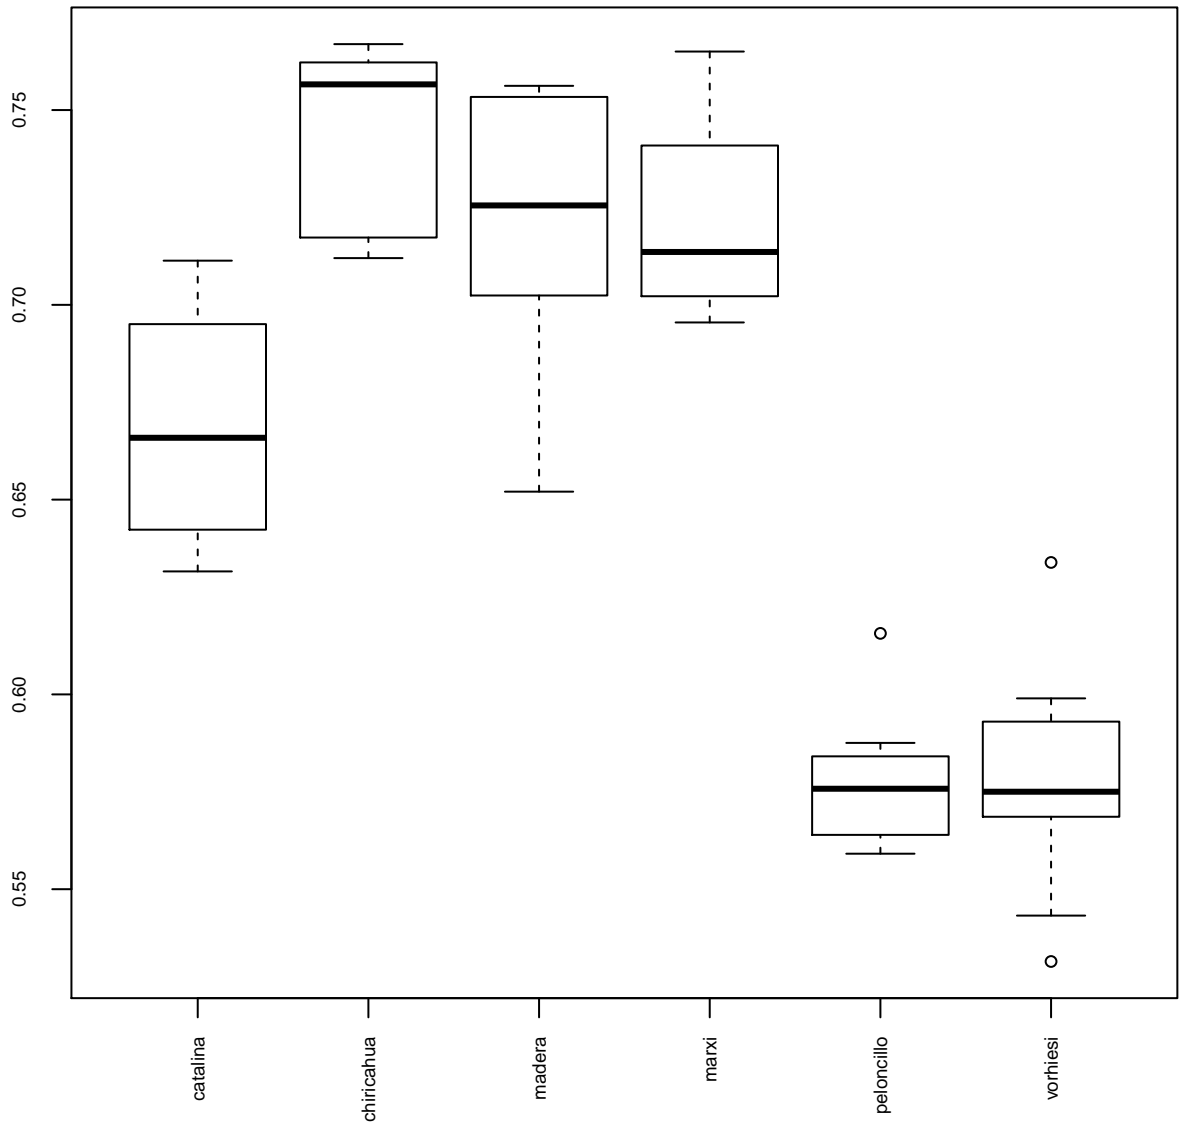

Supplement: Supplementary file 1419

## Femur 1/Tarsus 3 ratio – males

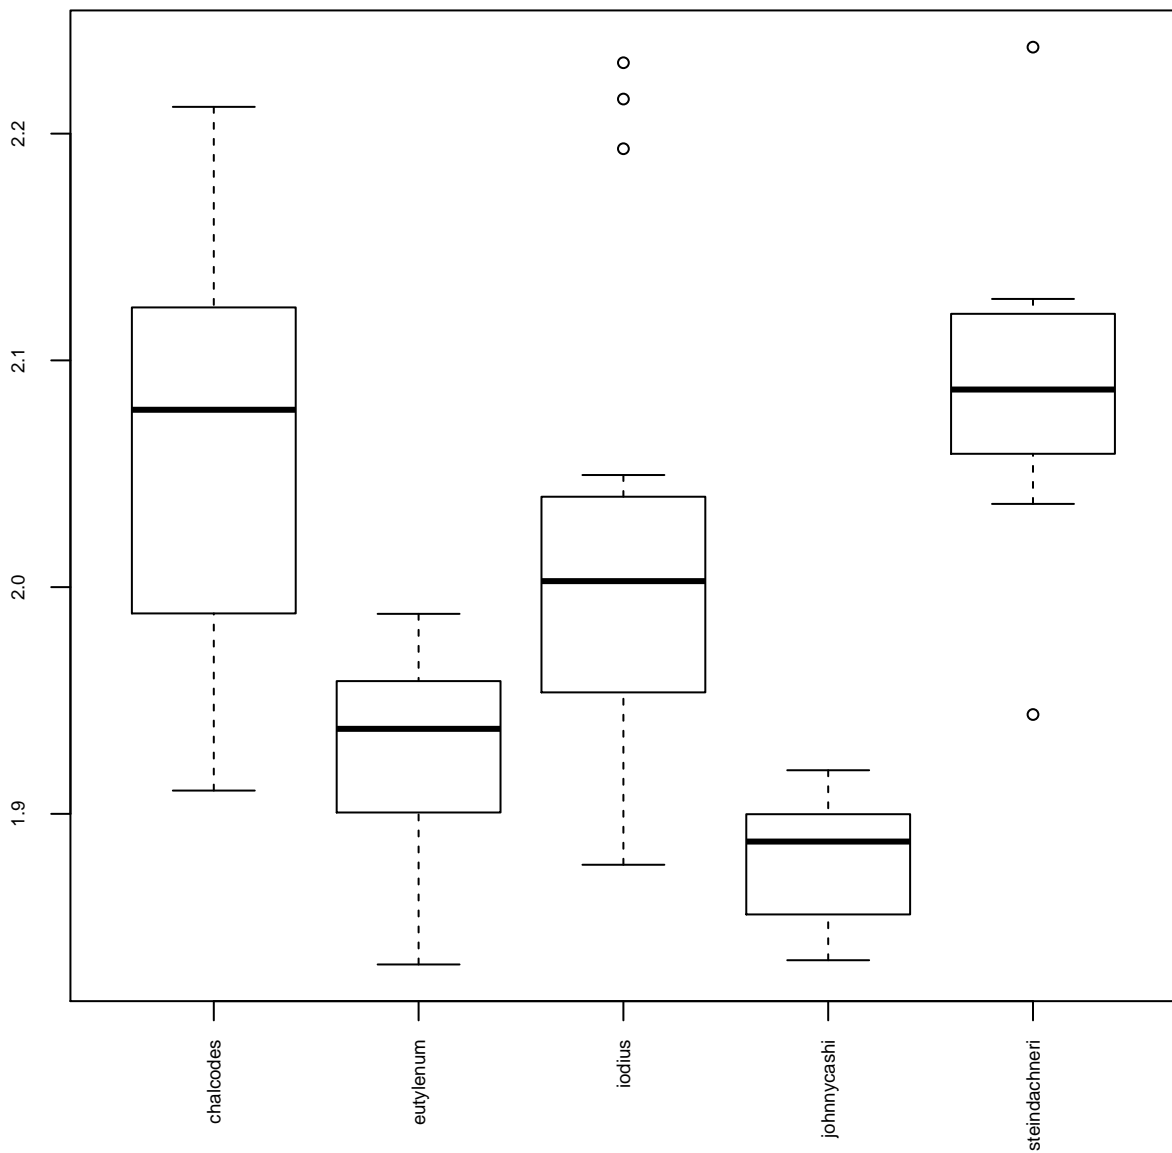

Supplement: Supplementary file 1420

## Patella 3/Tibia 3 ratio – males

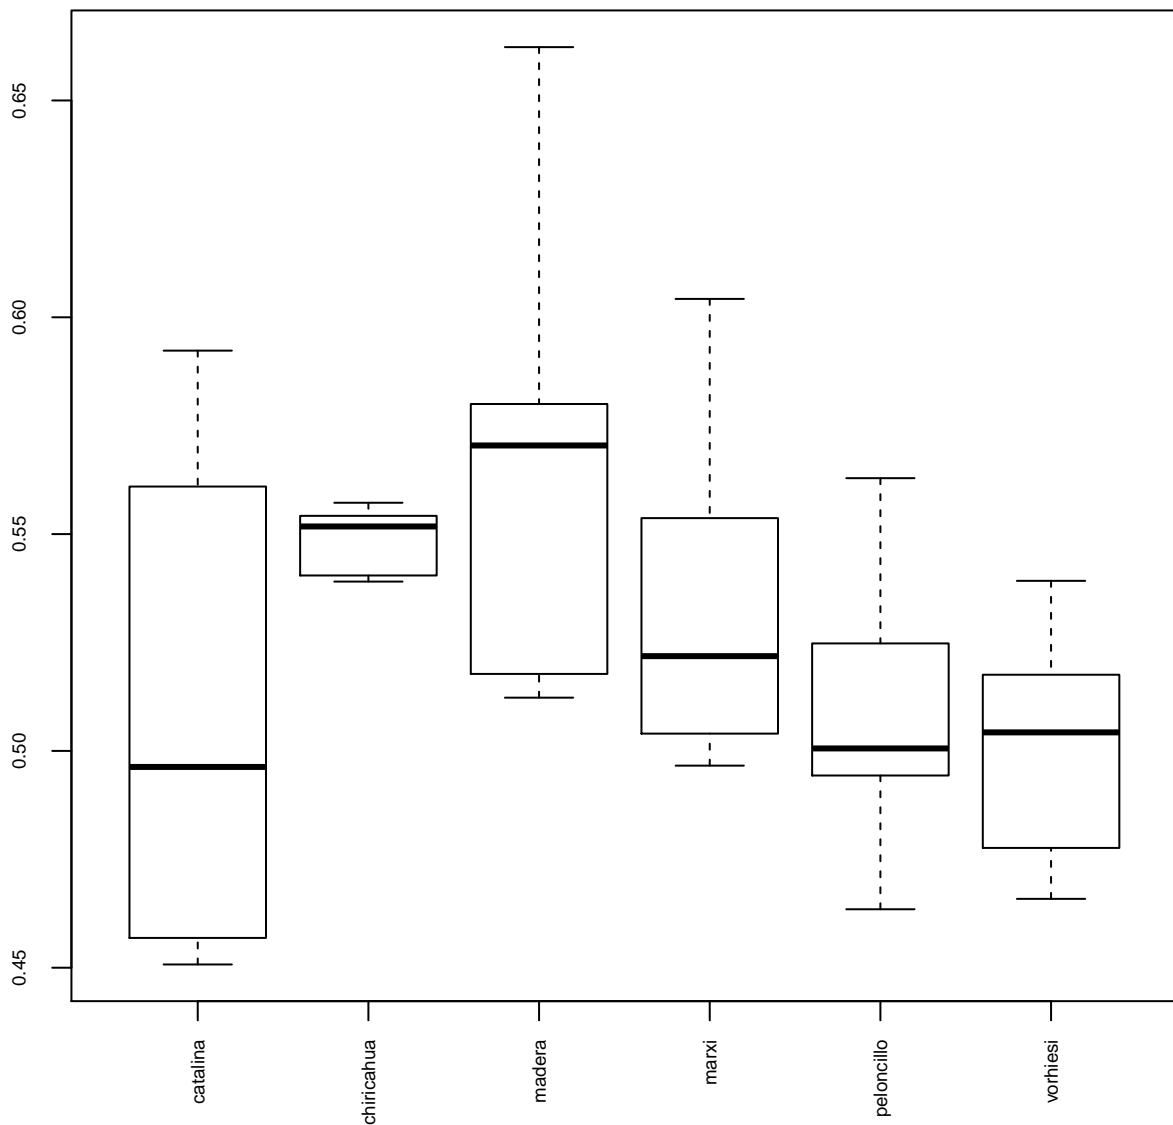

Supplement: Supplementary file 1421

## Carapace Width – males

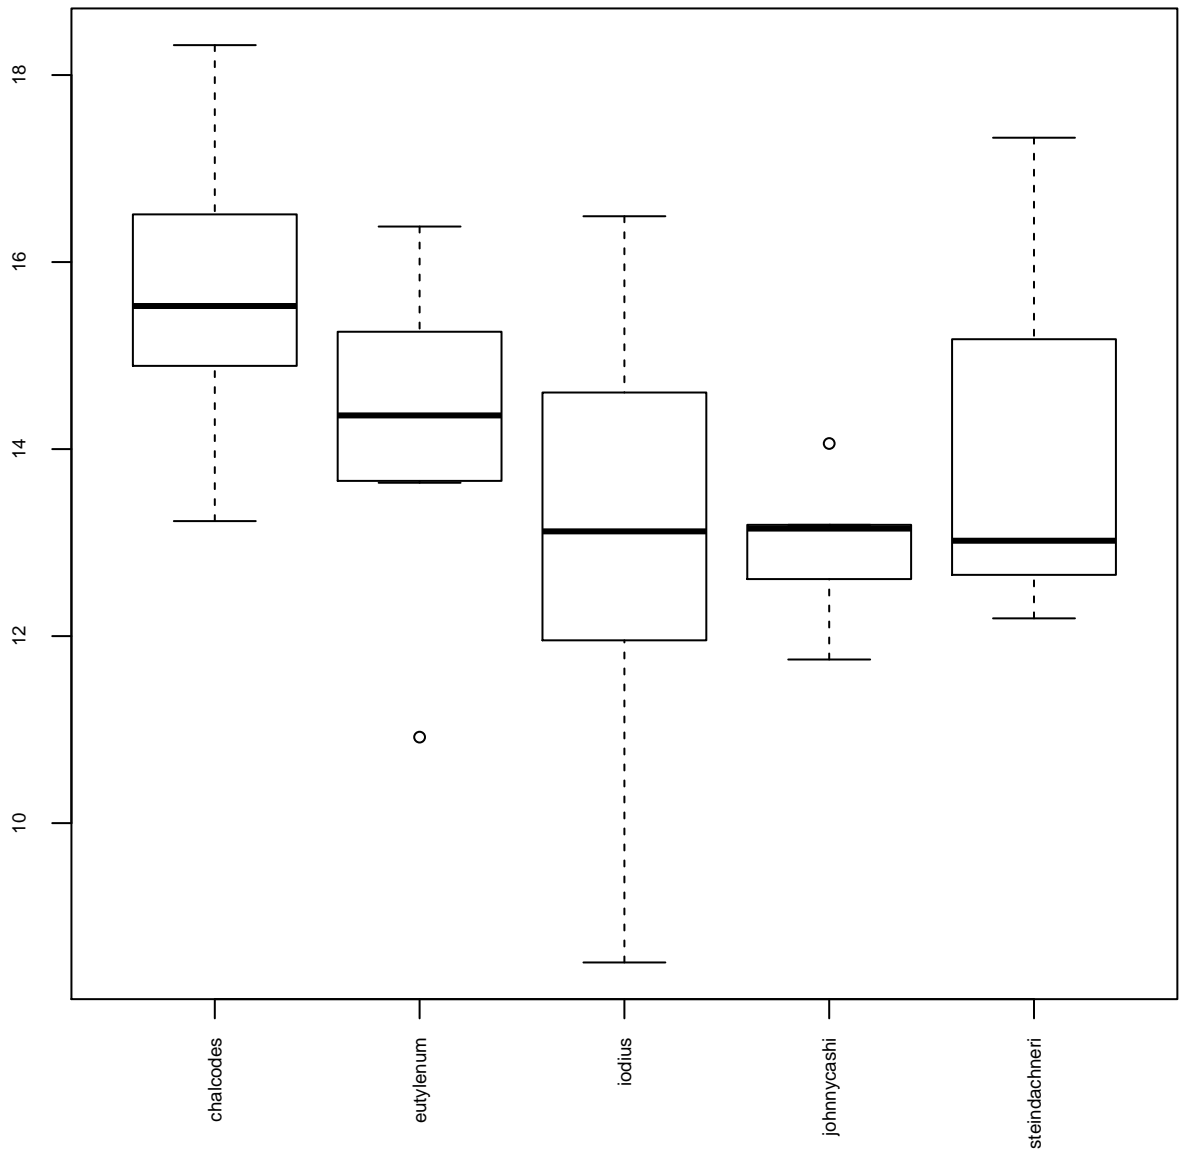

Supplement: Supplementary file 1422

Carapace Length/Tarsus 1 ratio – females

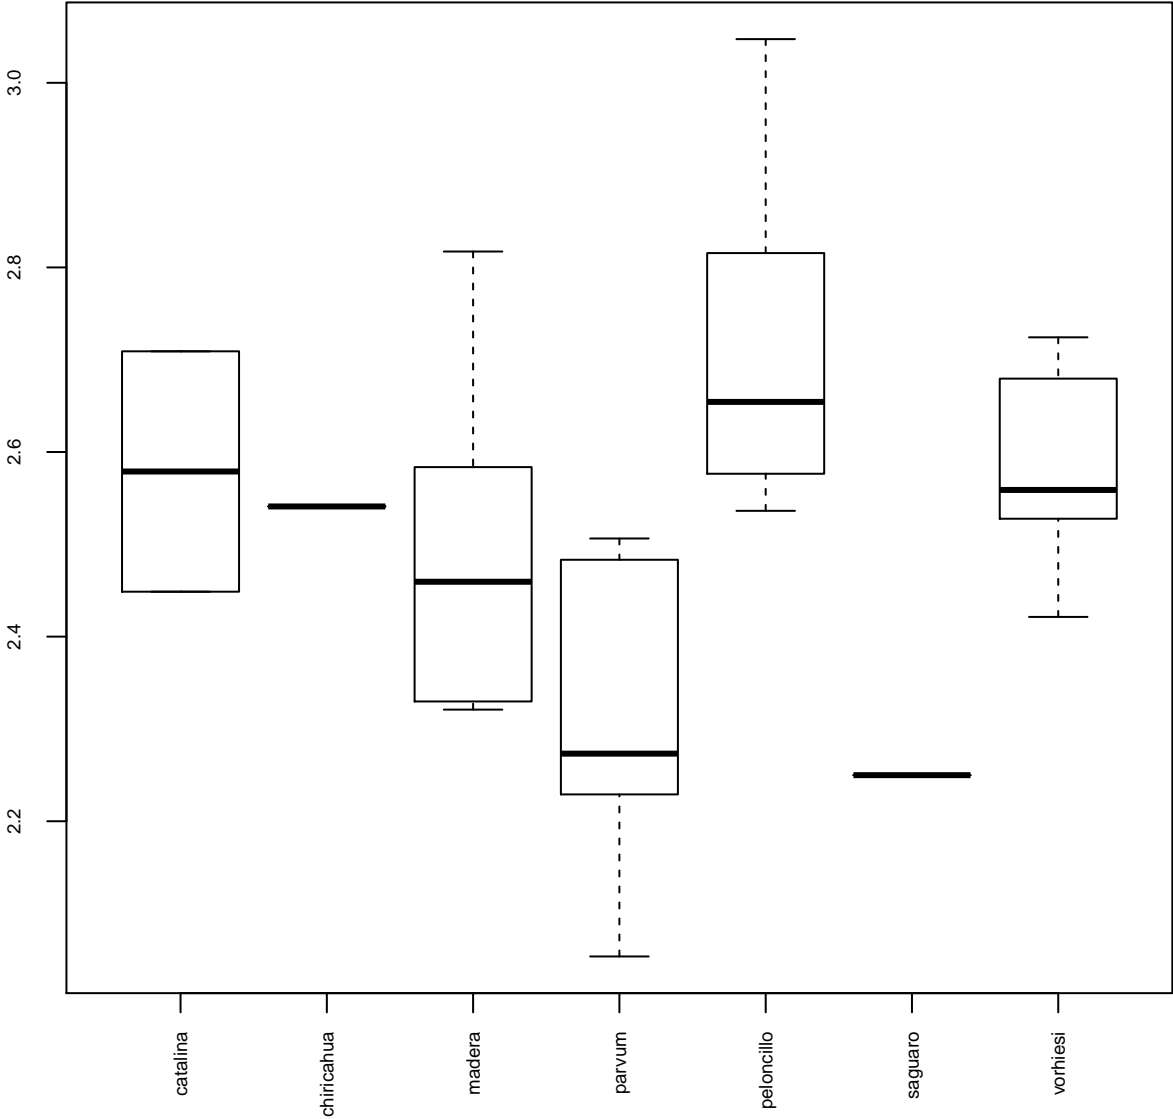

Supplement: Supplementary file 1423

## Femur 4/Tarsus 4 ratio – females

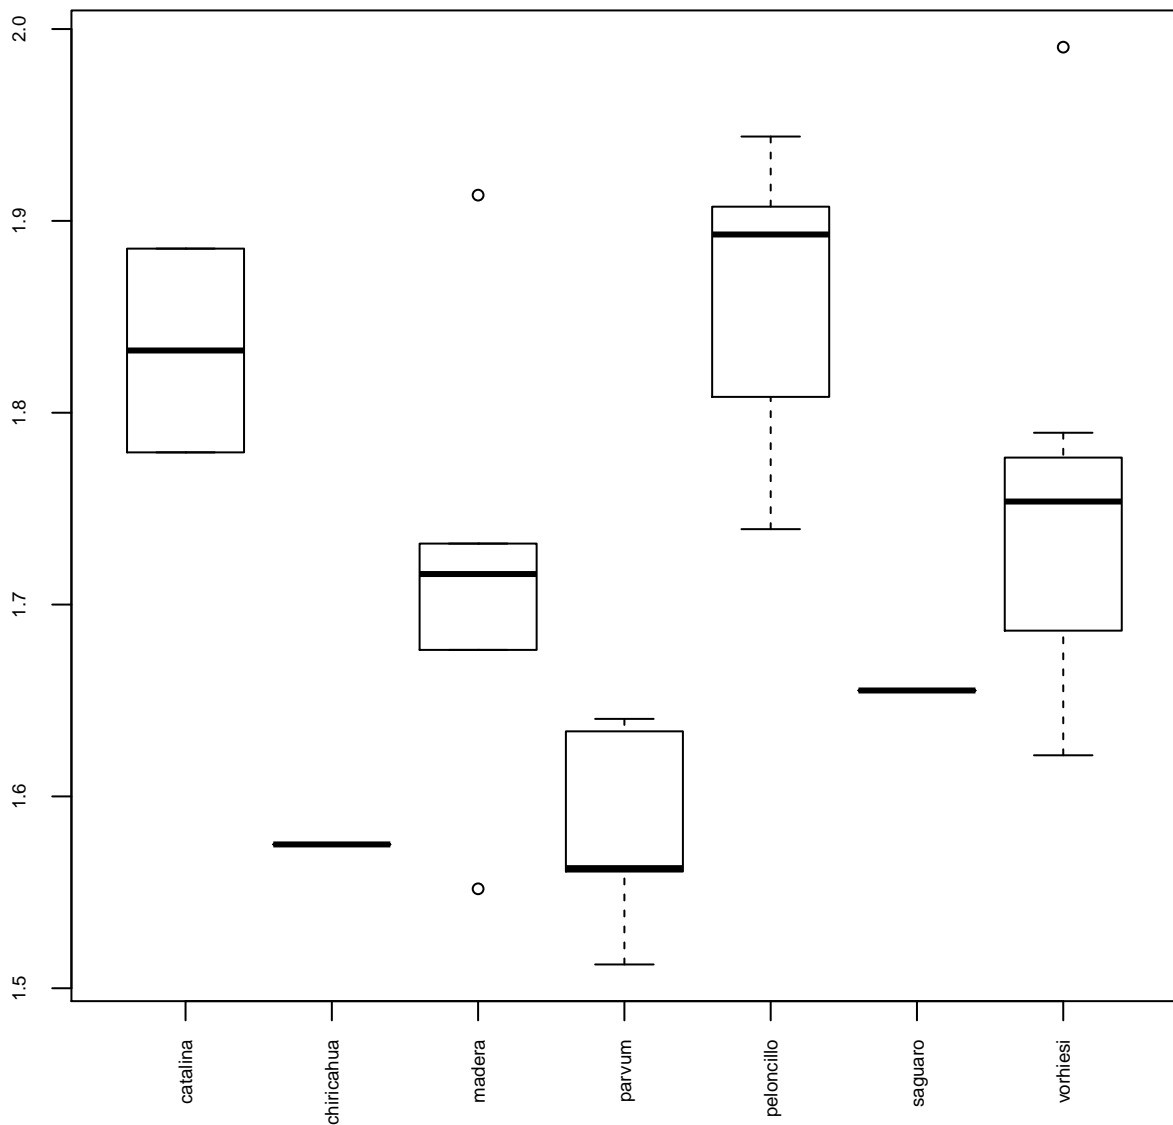

Supplement: Supplementary file 1424

## Patella 1/Tibia 3 Length ratio – females

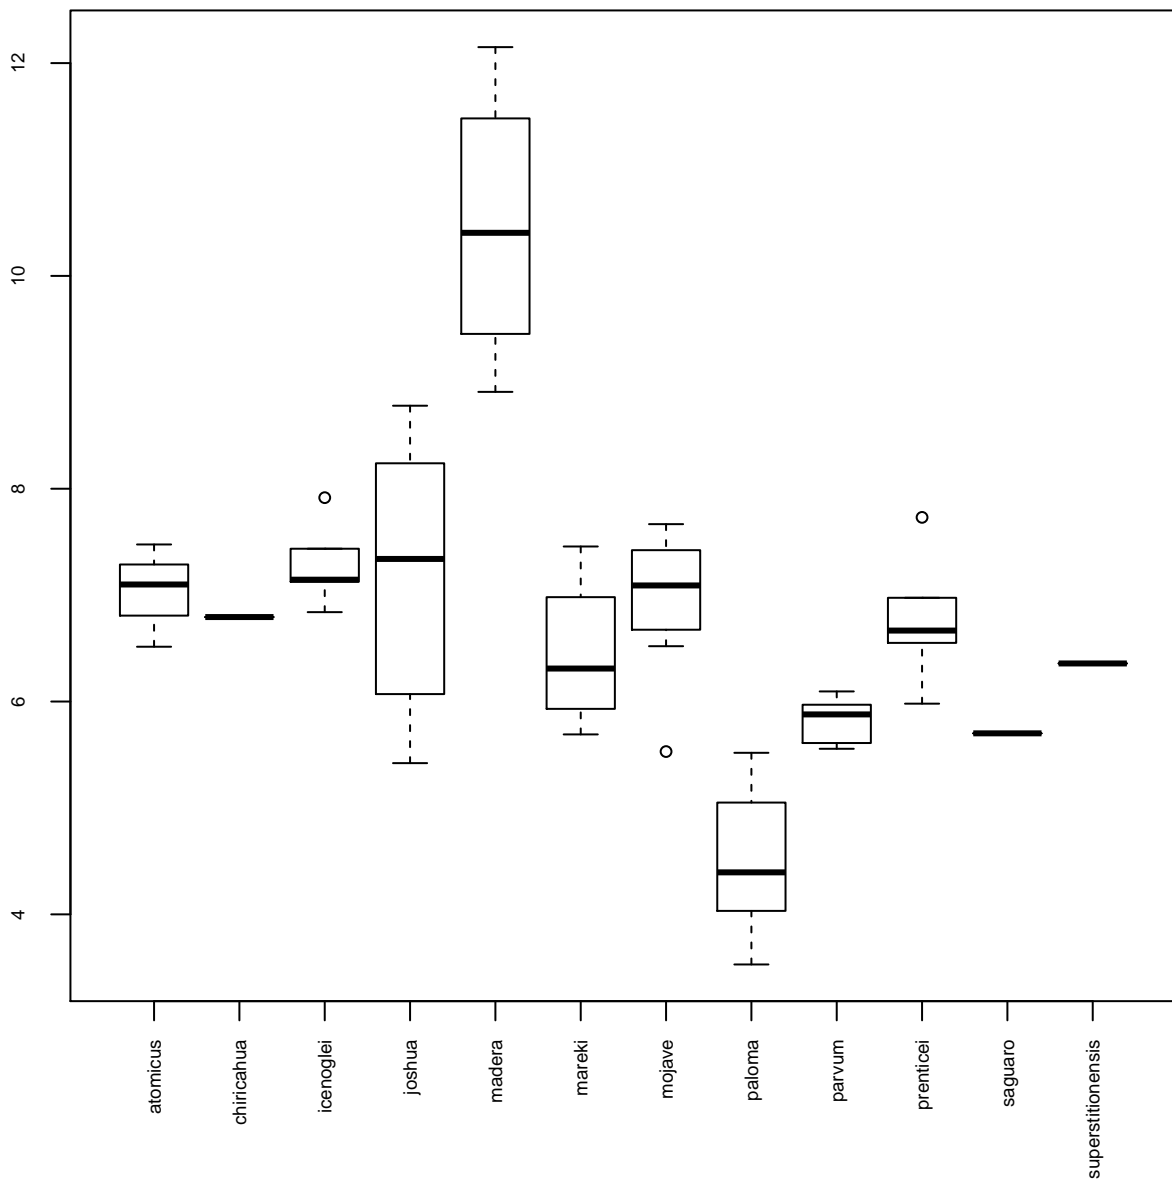

Supplement: Supplementary file 1425

## Femur 3/Patella 3 ratio – females

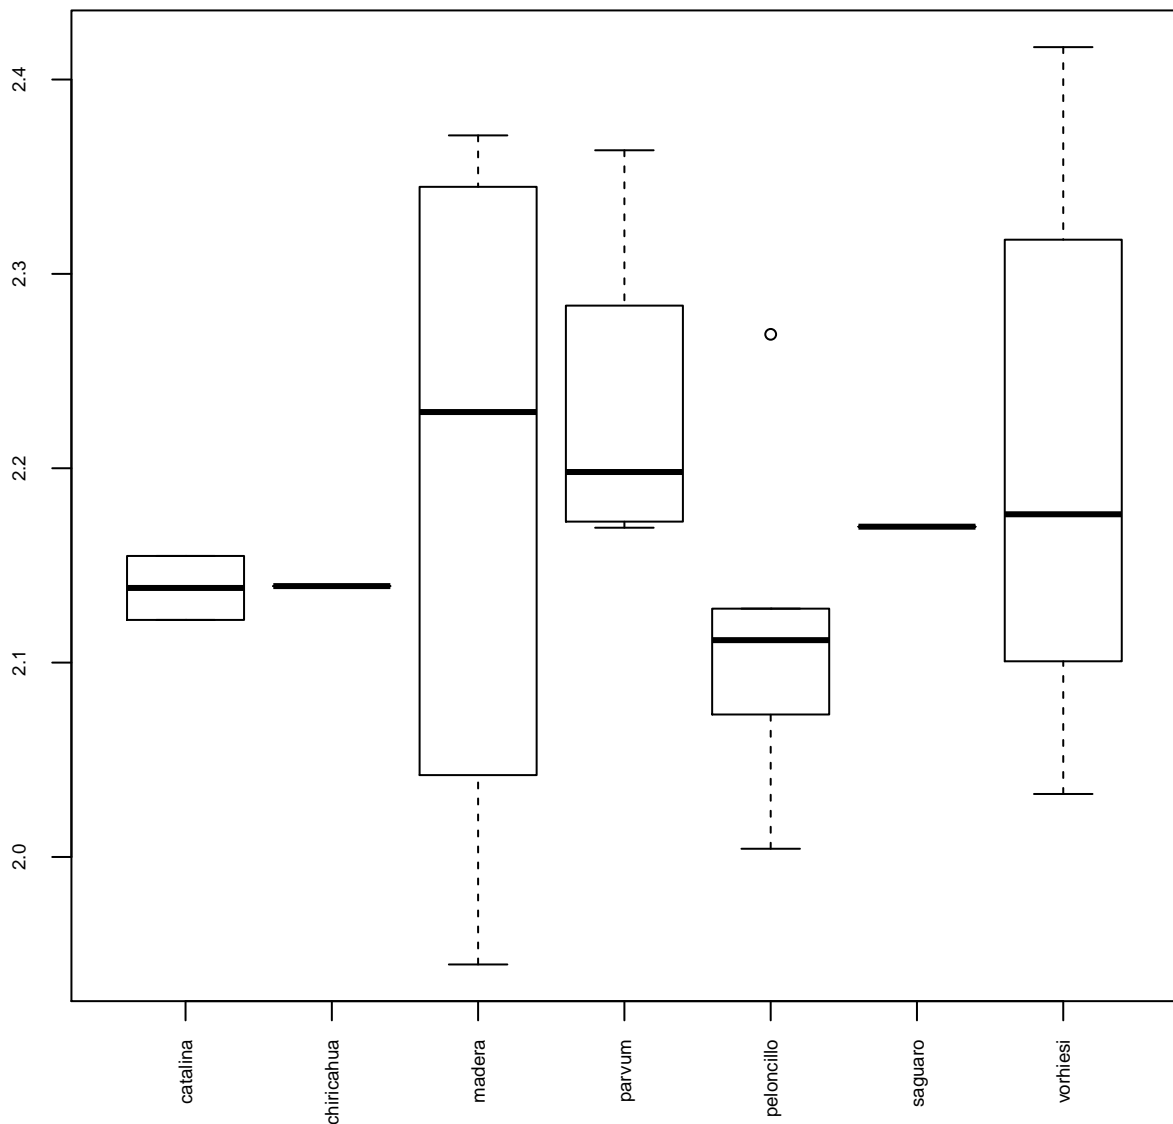

Supplement: Supplementary file 1426

## Tibia 4/Metatarsus 4 ratio – females

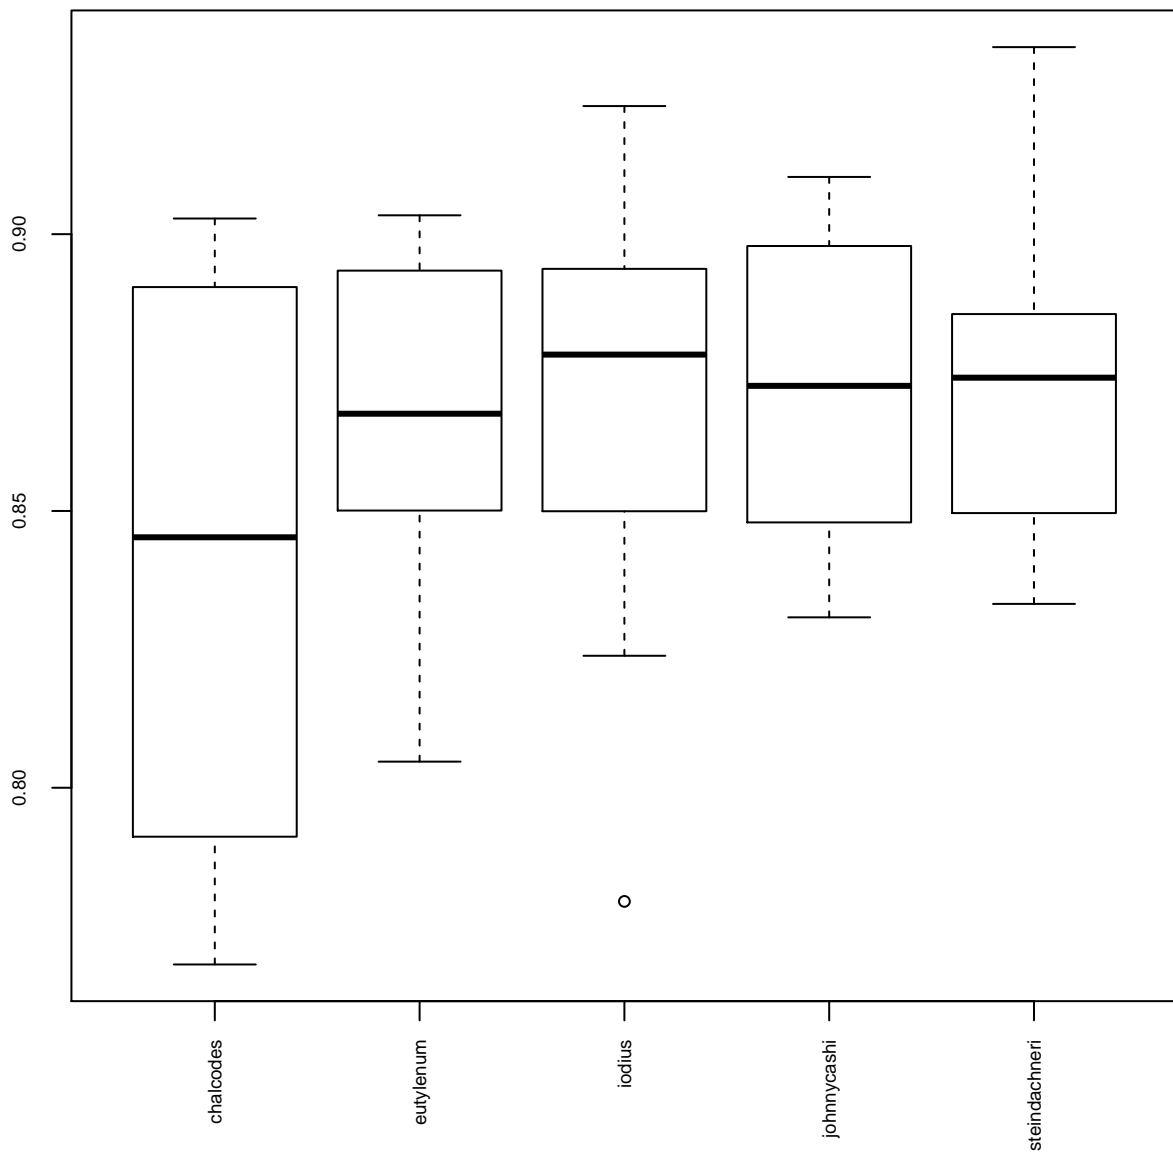

Supplement: Supplementary file 1427

## Patella 3/Tarsus 3 ratio – males

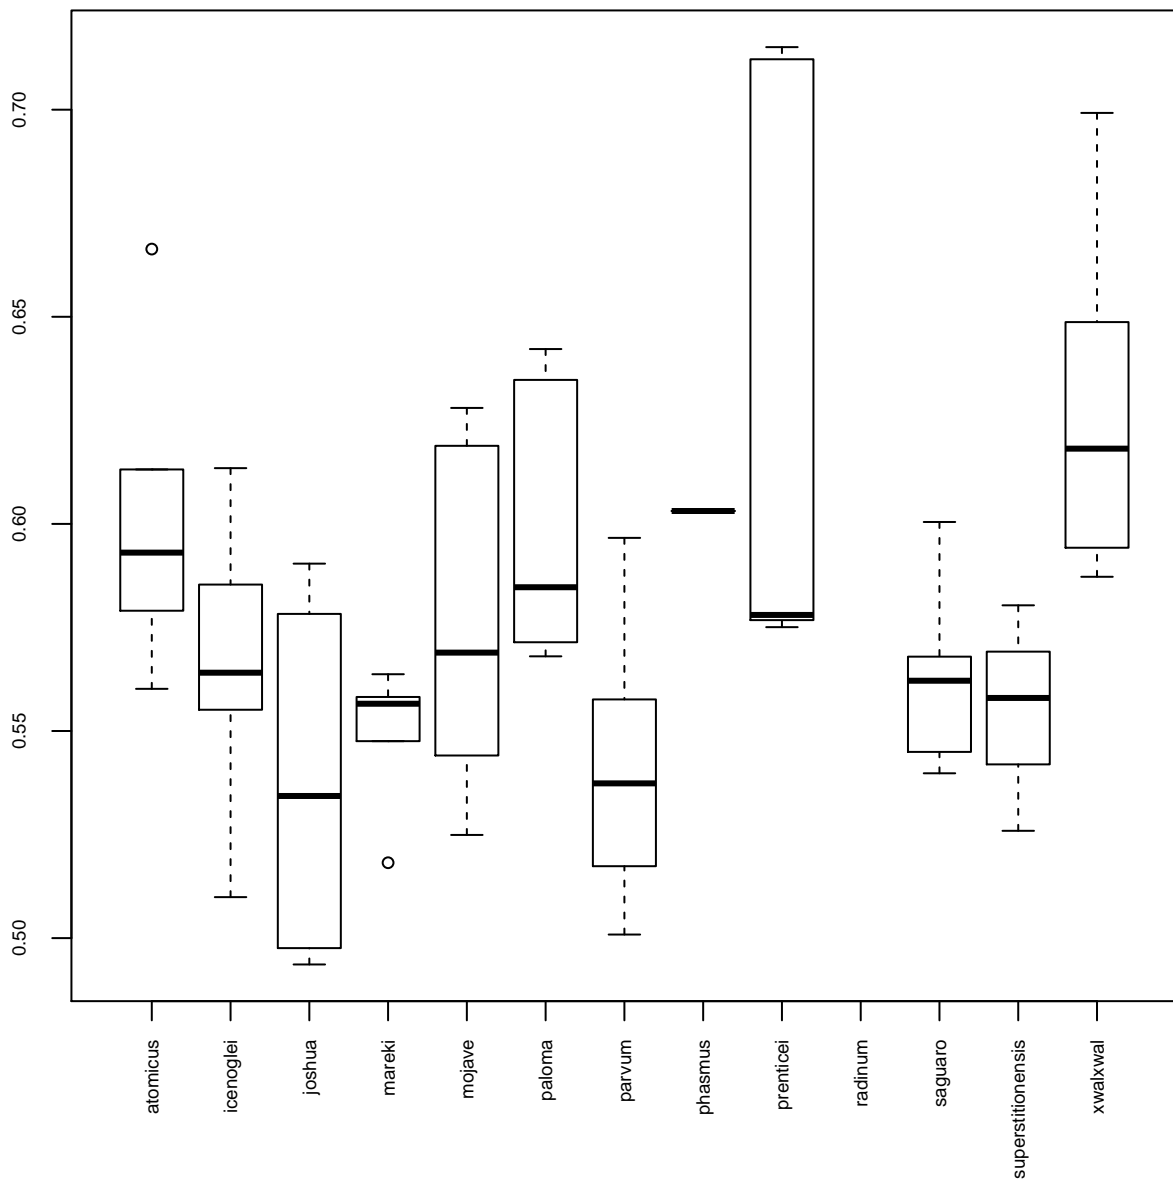

Supplement: Supplementary file 1428

## Leg 3 Length – females

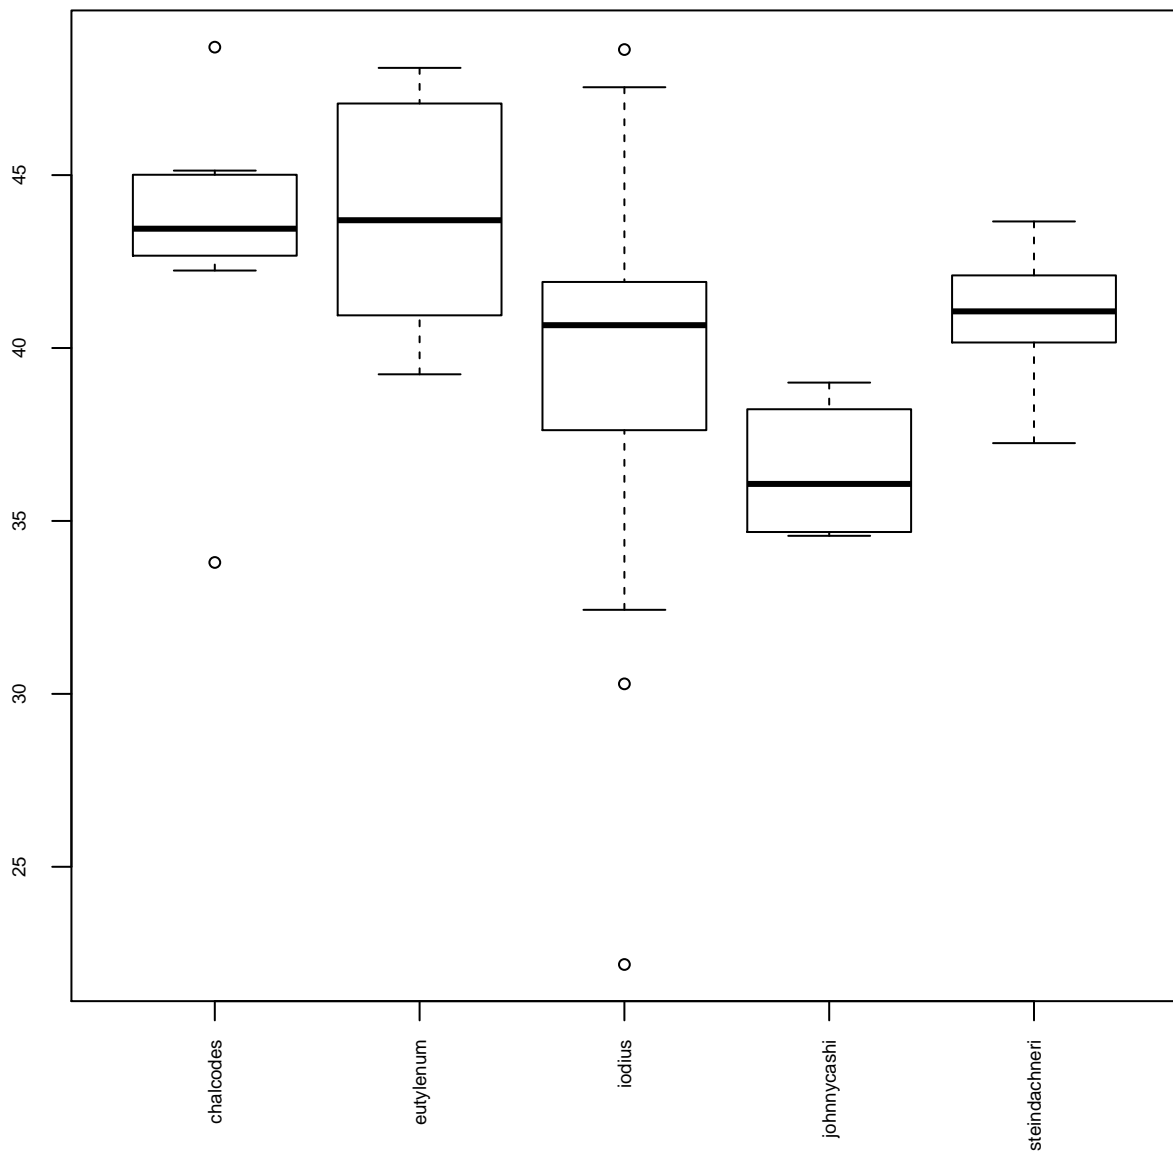

Supplement: Supplementary file 1429

## Patella 1/Tarsus 4 Length ratio – females

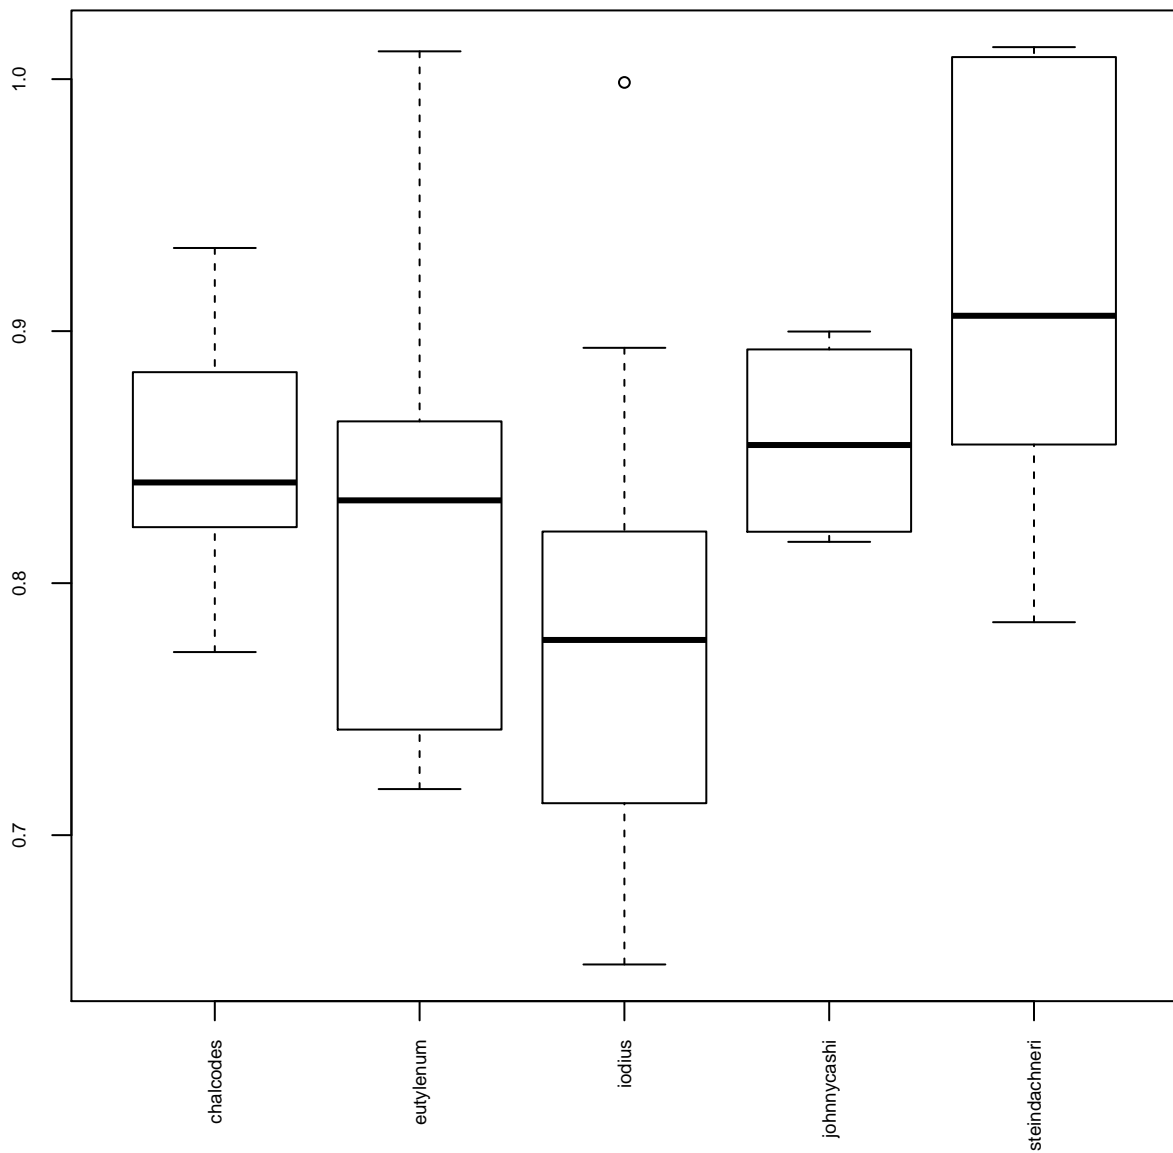

Supplement: Supplementary file 1430

# Tibia 1/Metatarsus 3 Length ratio – males

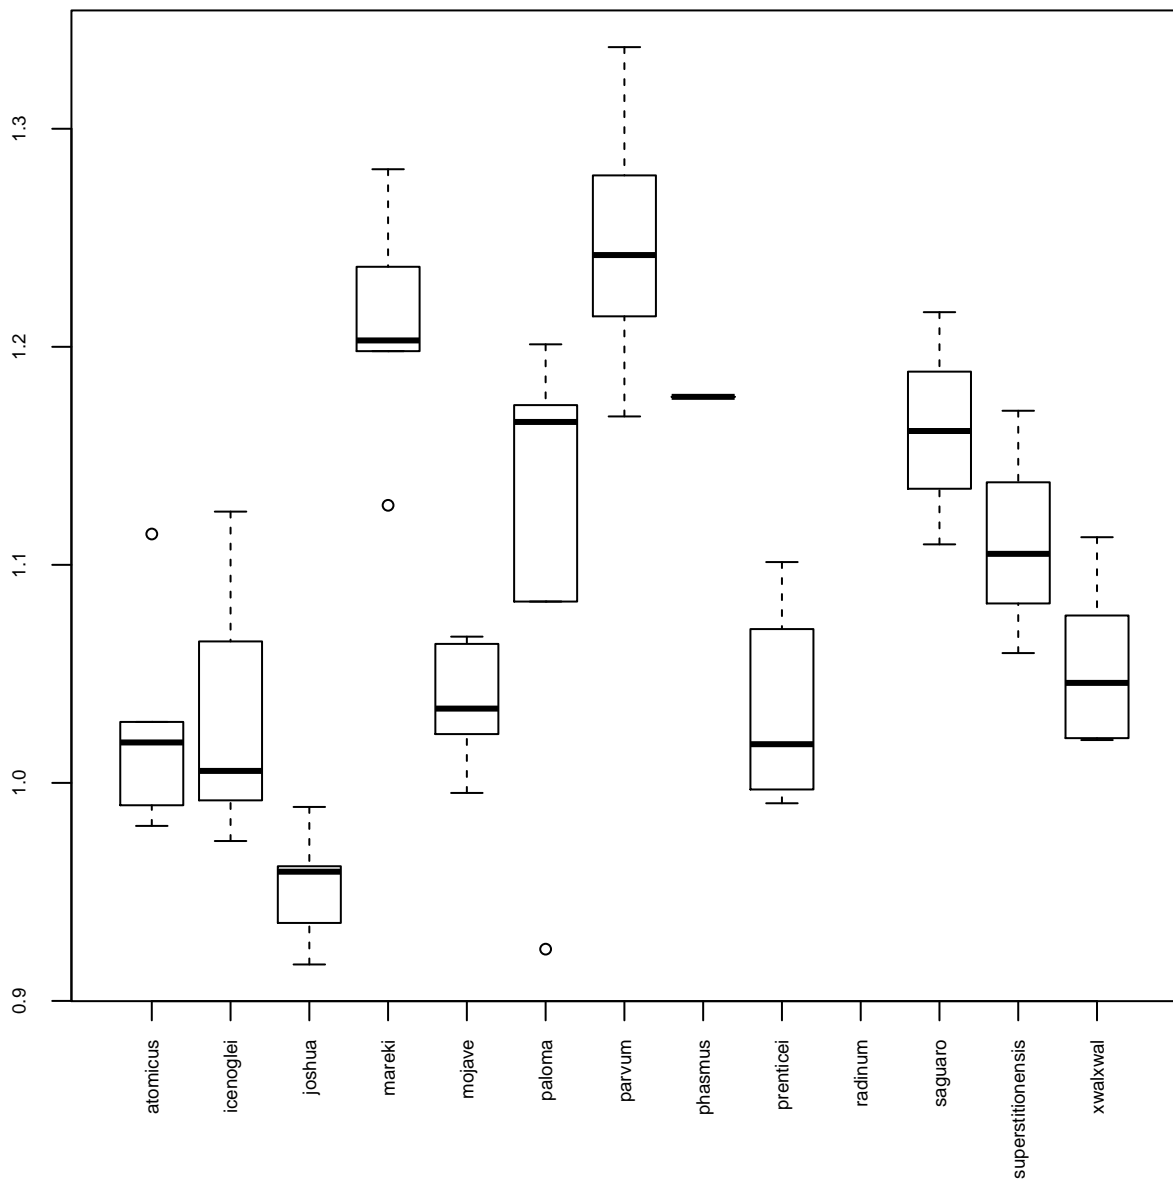

Supplement: Supplementary file 1431

## Tarsus 3/Tarsus 4 ratio – females

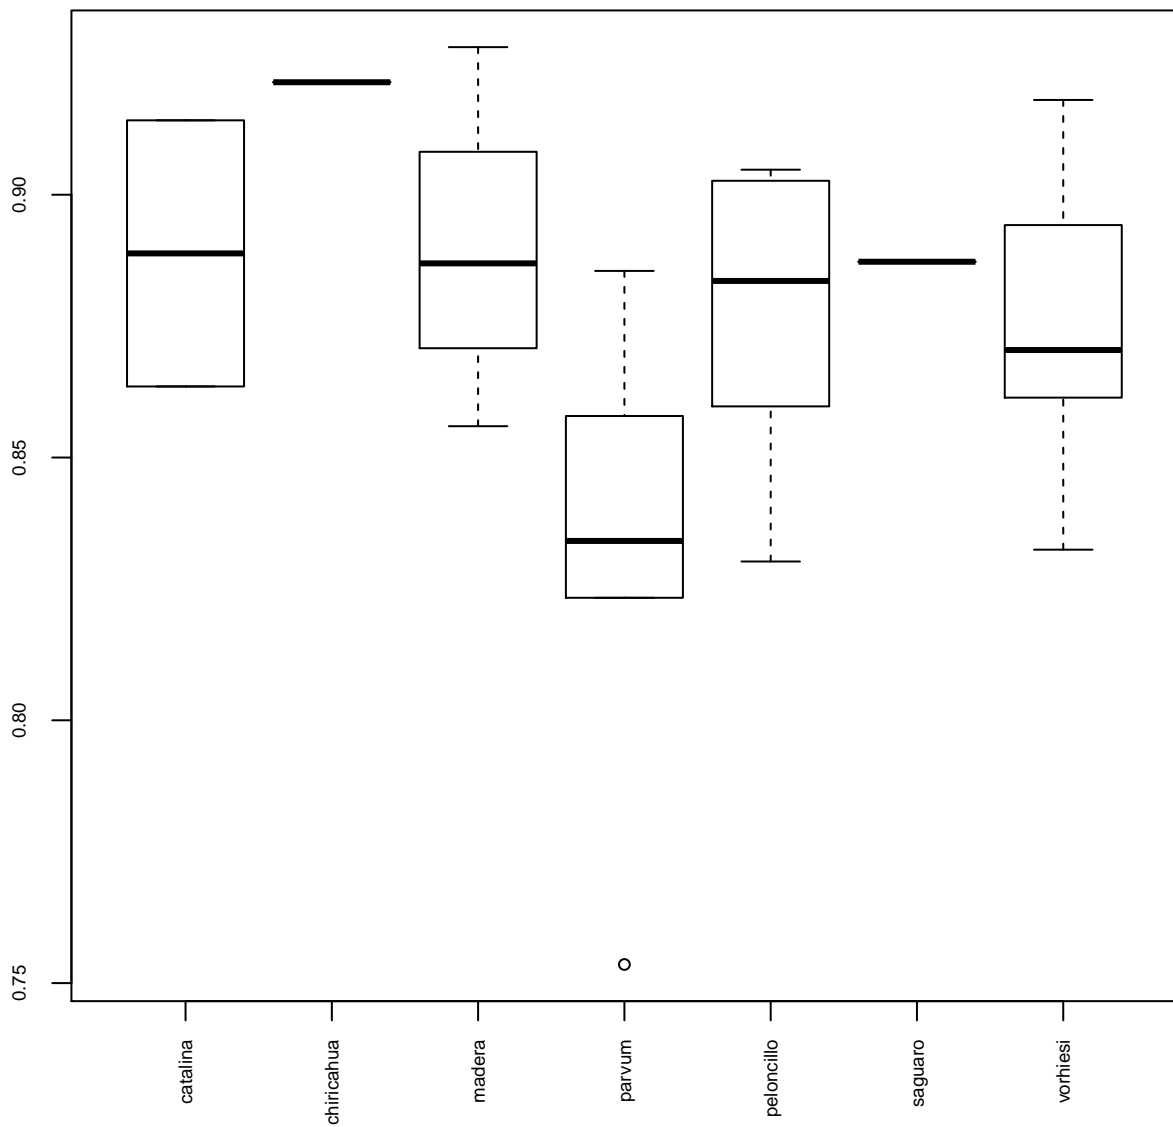

Supplement: Supplementary file 1432

## Carapace Length/Metatarsus 3 ratio – females

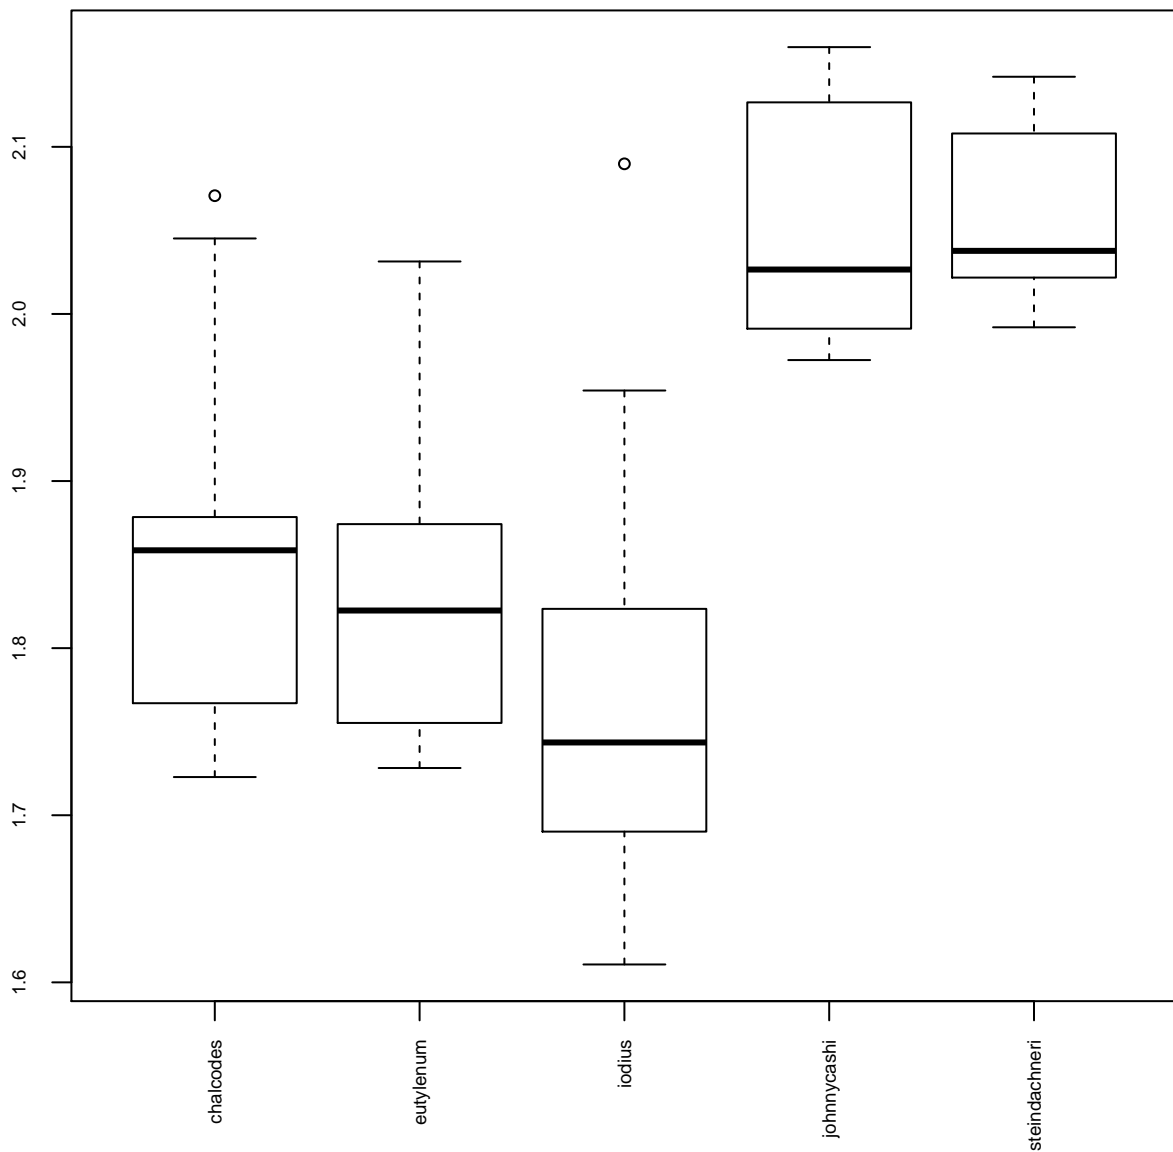

Supplement: Supplementary file 1433

## Leg 1/Leg 4 Length ratio – males

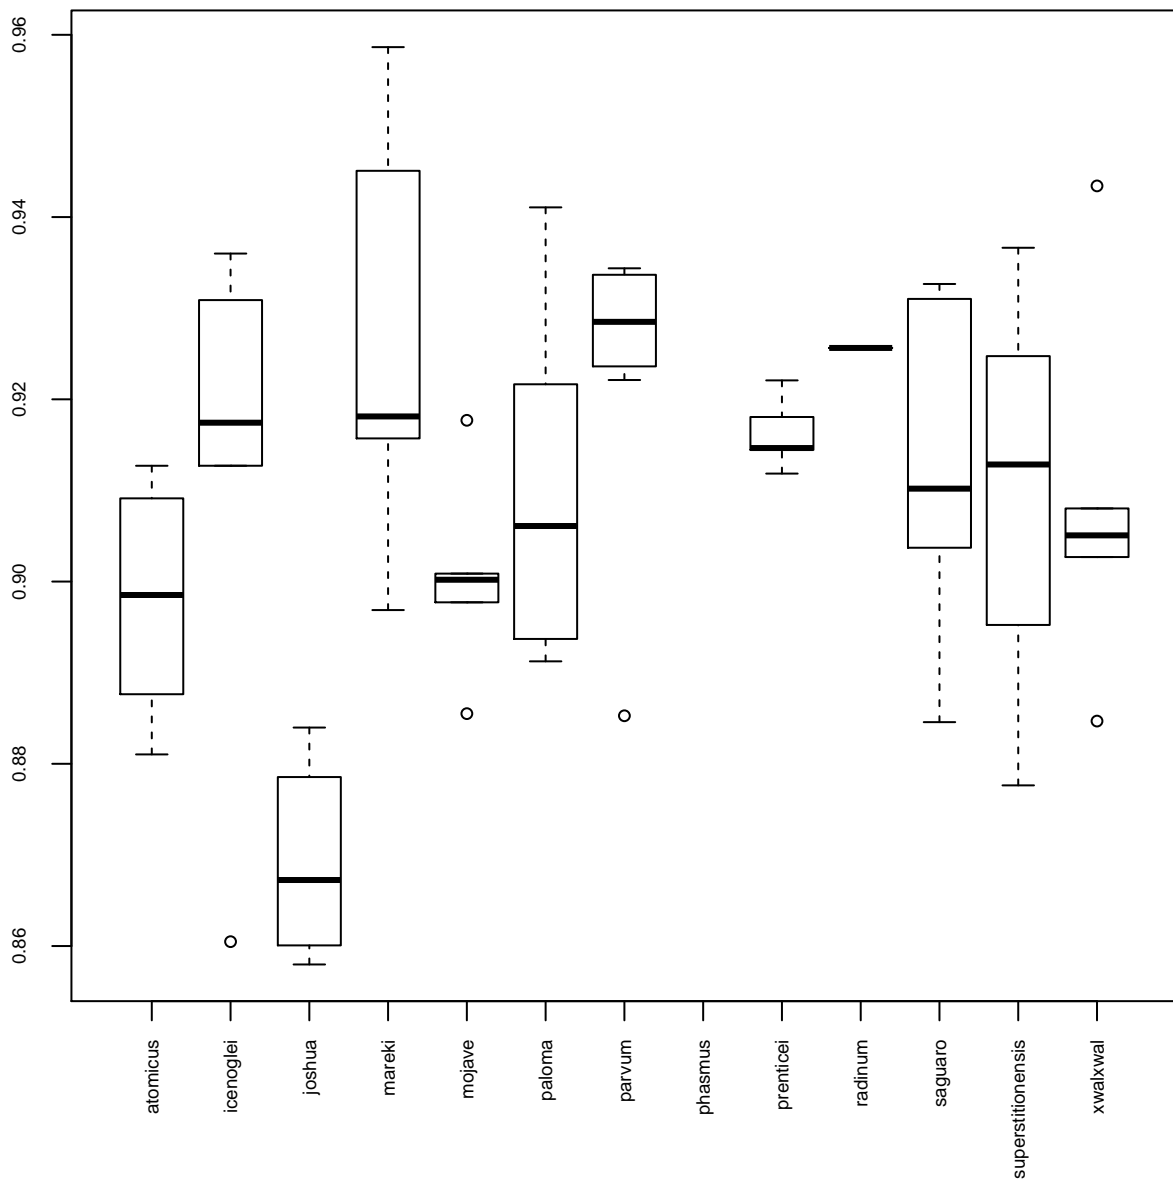

Supplement: Supplementary file 1434

## Palpal Tibia/Tibia 1 Length ratio – males

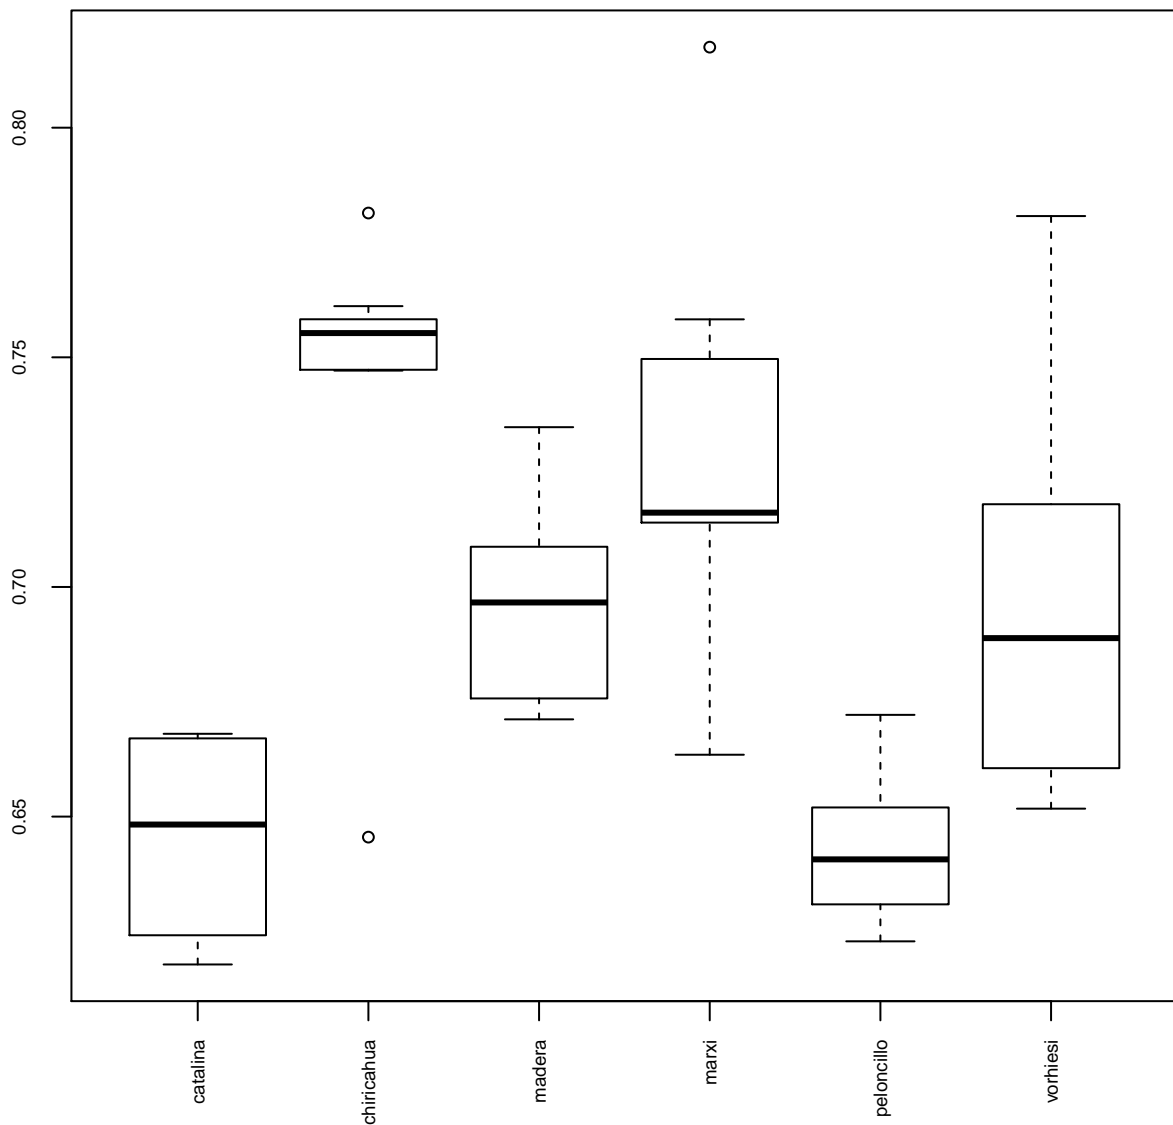

Supplement: Supplementary file 1435

## Femur 3/Tibia 3 ratio – females

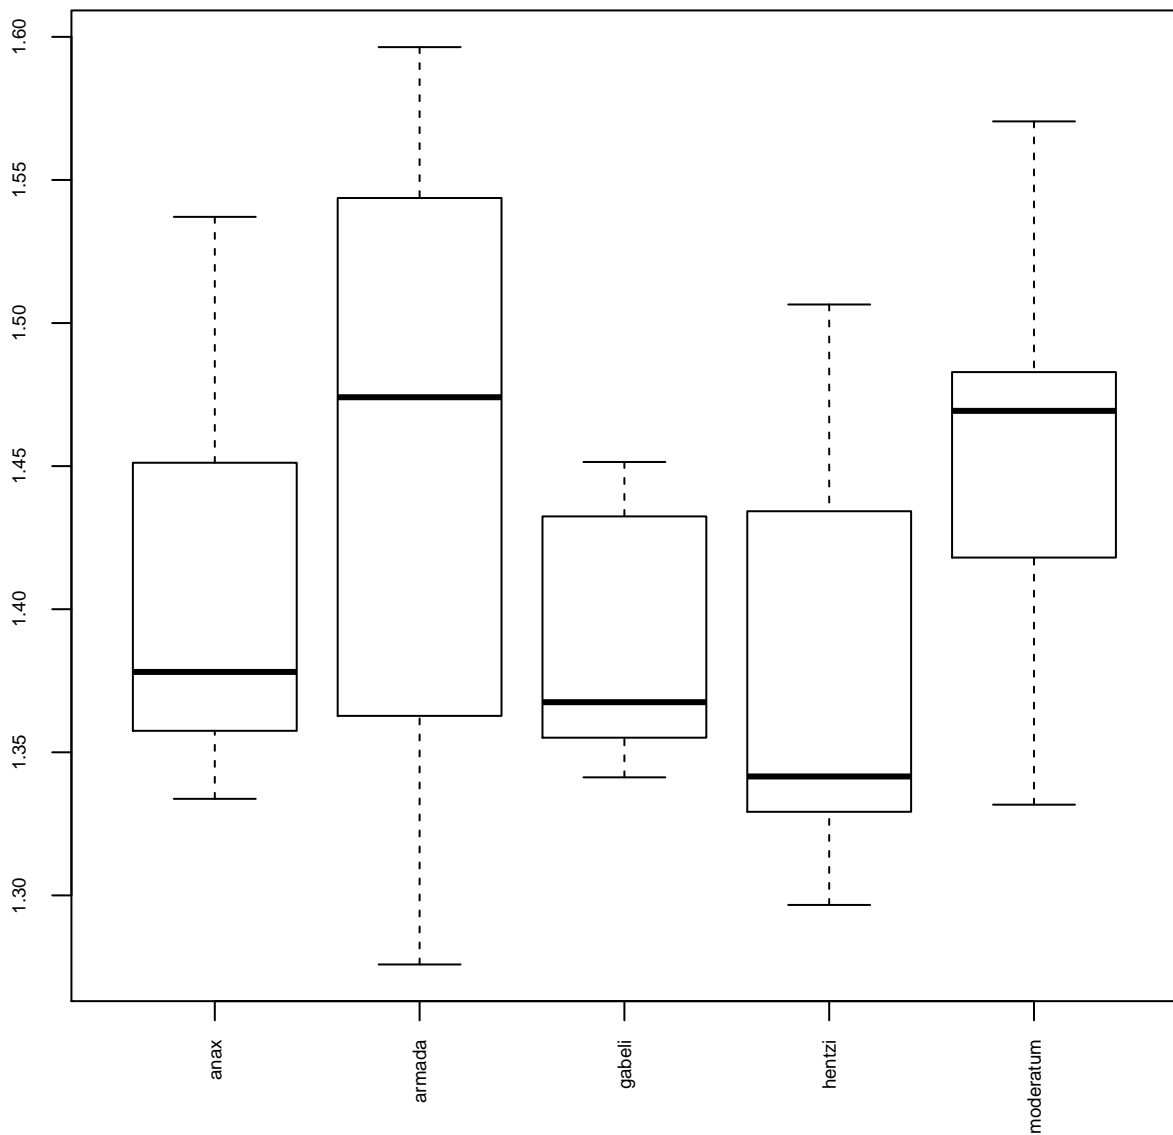

Supplement: Supplementary file 1436

## Palpal Tibia/Patella 1 Length ratio – males

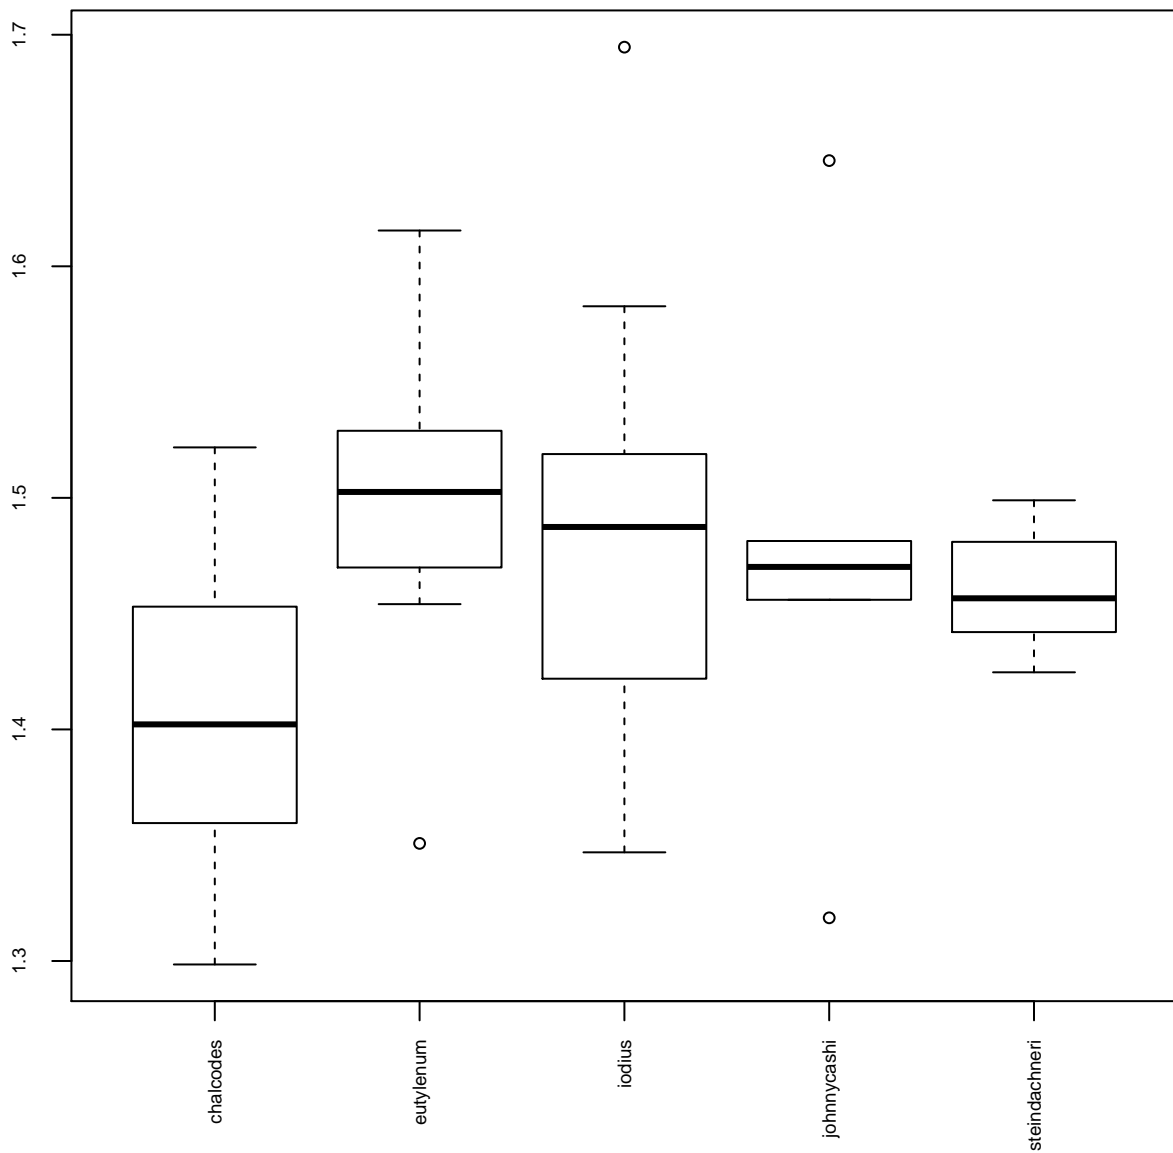

Supplement: Supplementary file 1437

## Leg 1/Leg 4 Length ratio – females

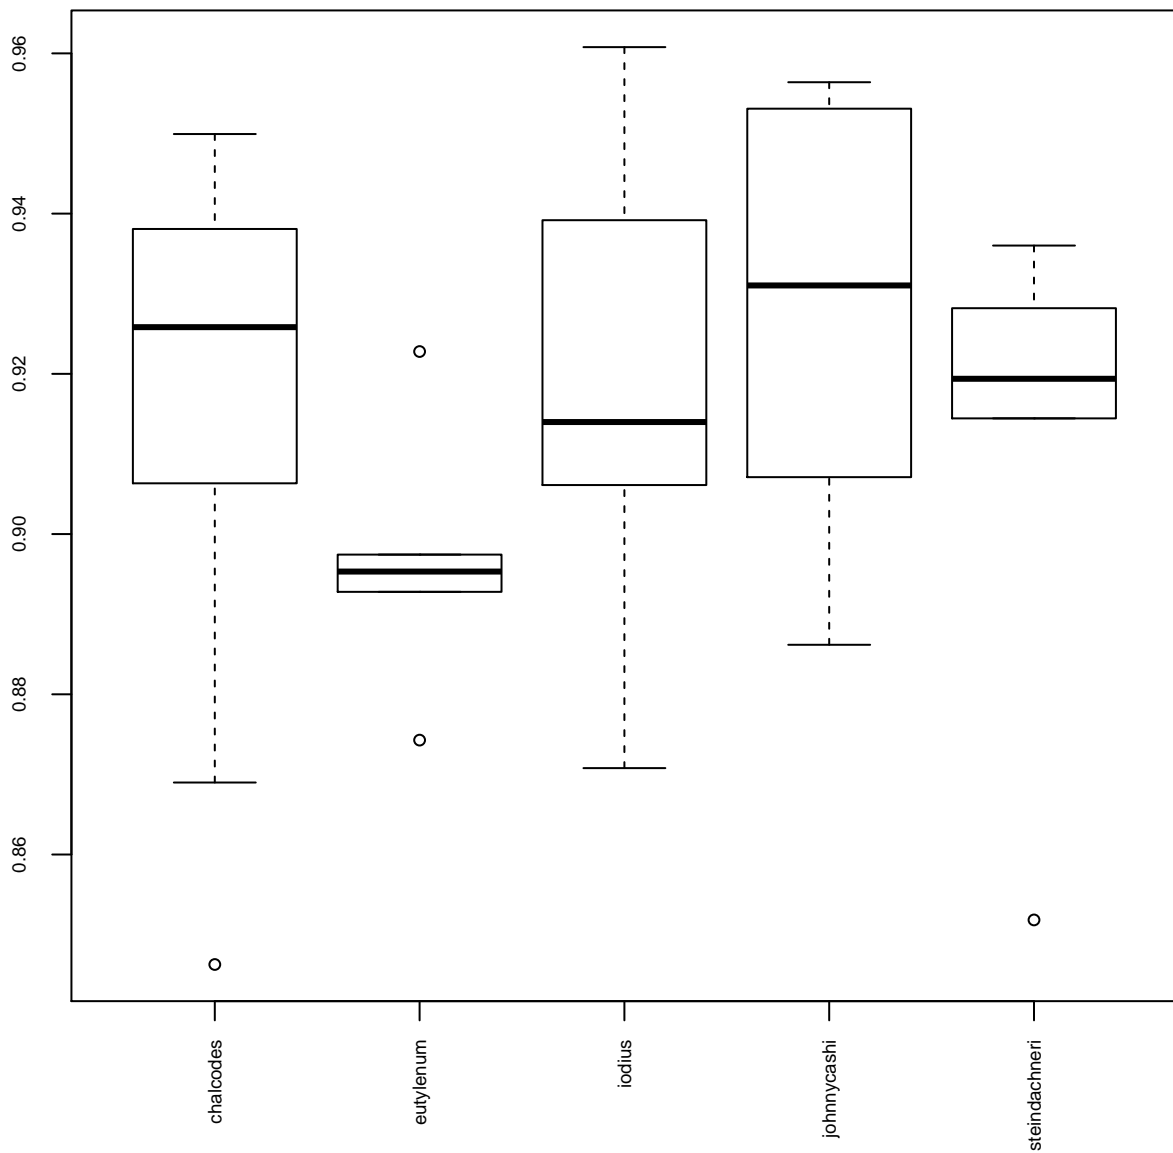

Supplement: Supplementary file 1438

## Tibia 1/Patella 4 Length ratio – males

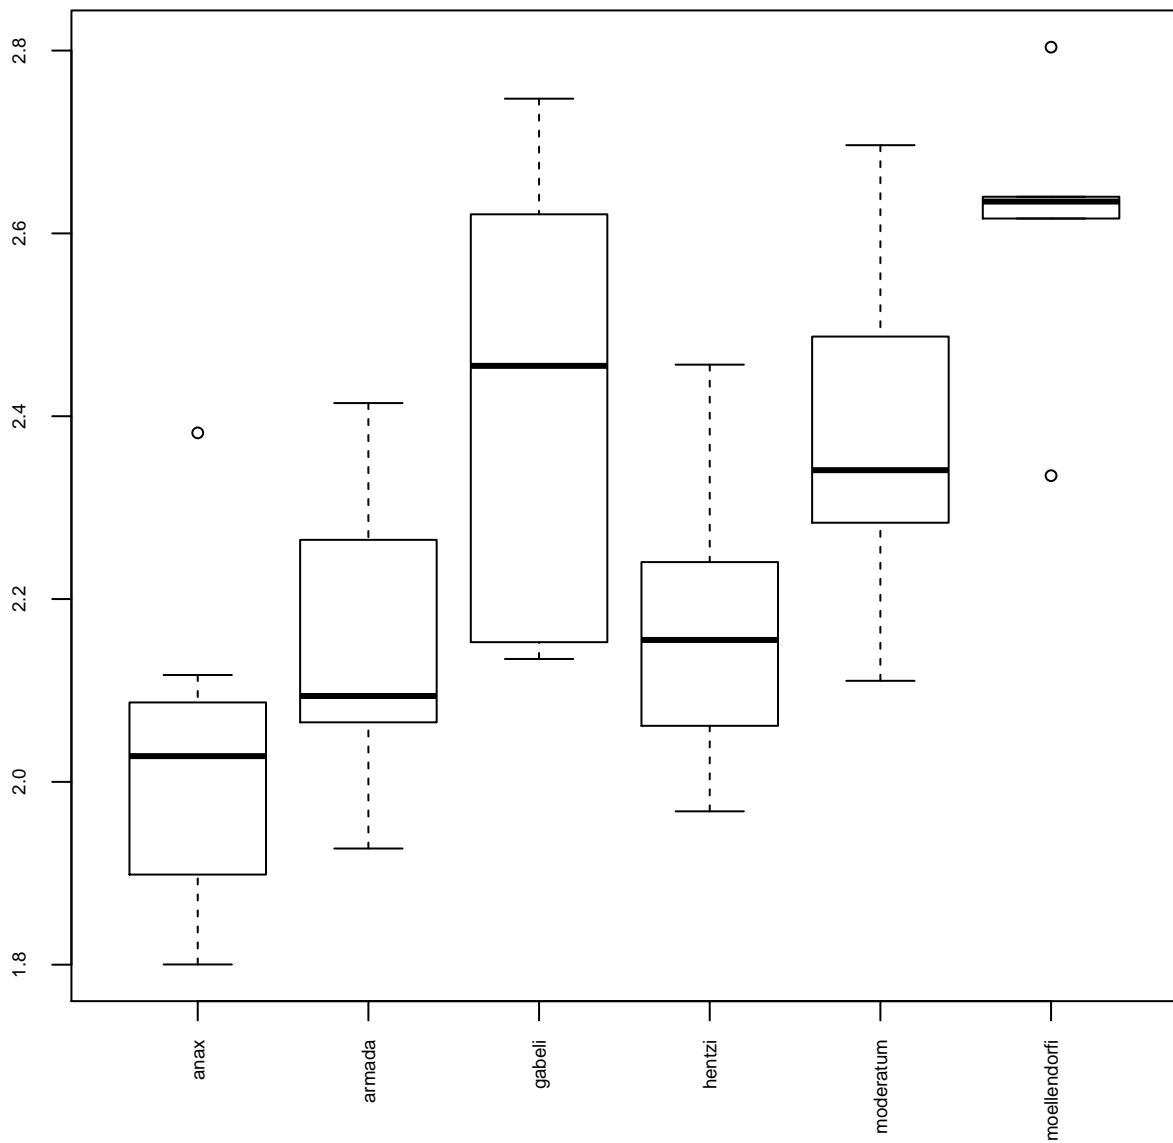

Supplement: Supplementary file 1439

## Metatarsus 1/Tibia 4 Length ratio – males

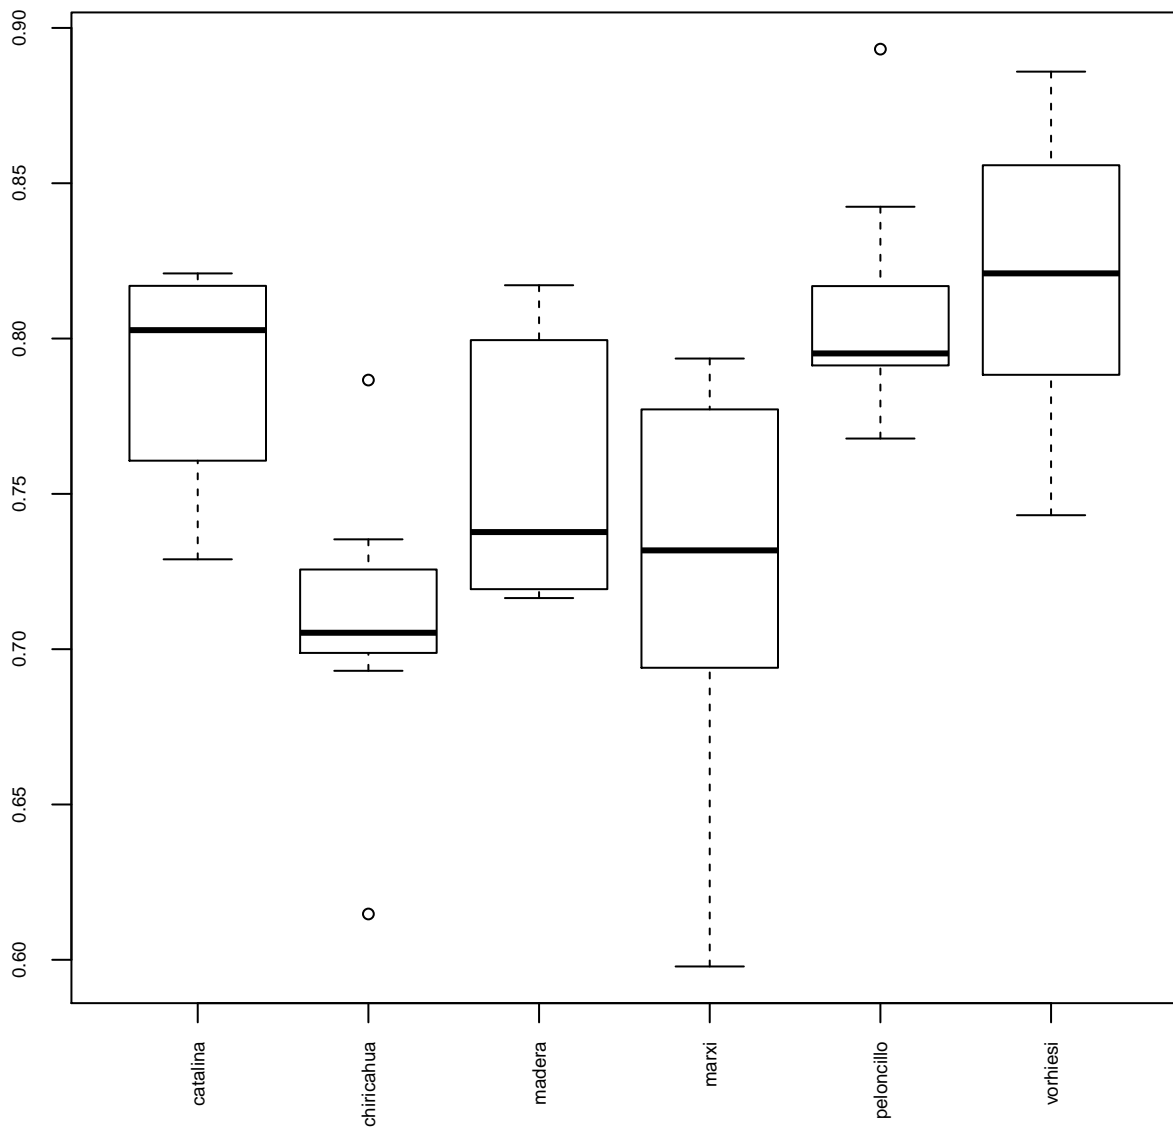

Supplement: Supplementary file 1440

## Carapace Length/Metatarsus 3 ratio – females

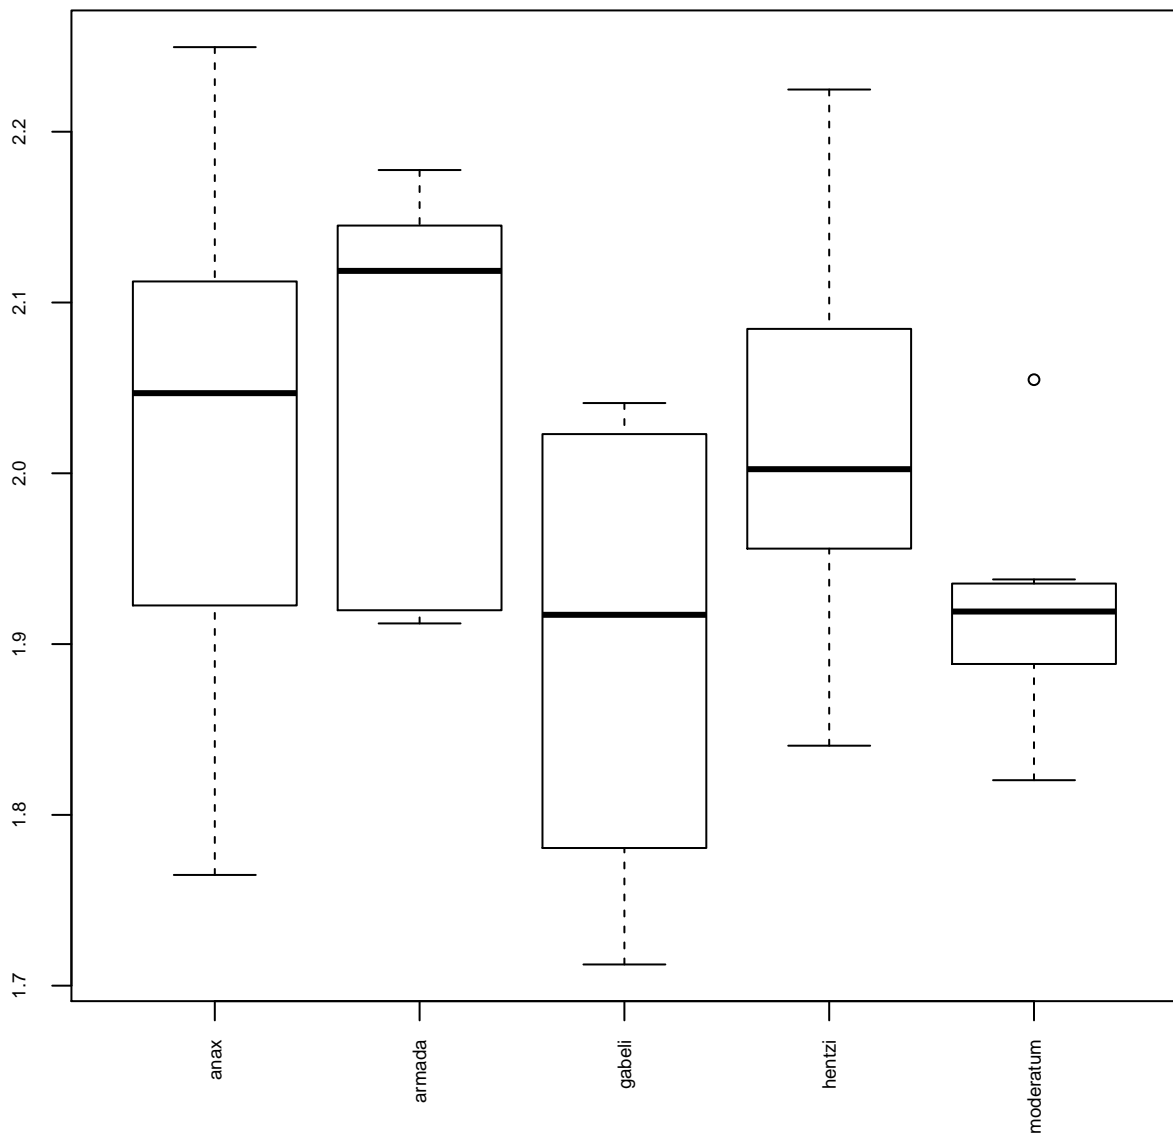

Supplement: Supplementary file 1441

## Femur 1/Metatarsus 1 ratio – males

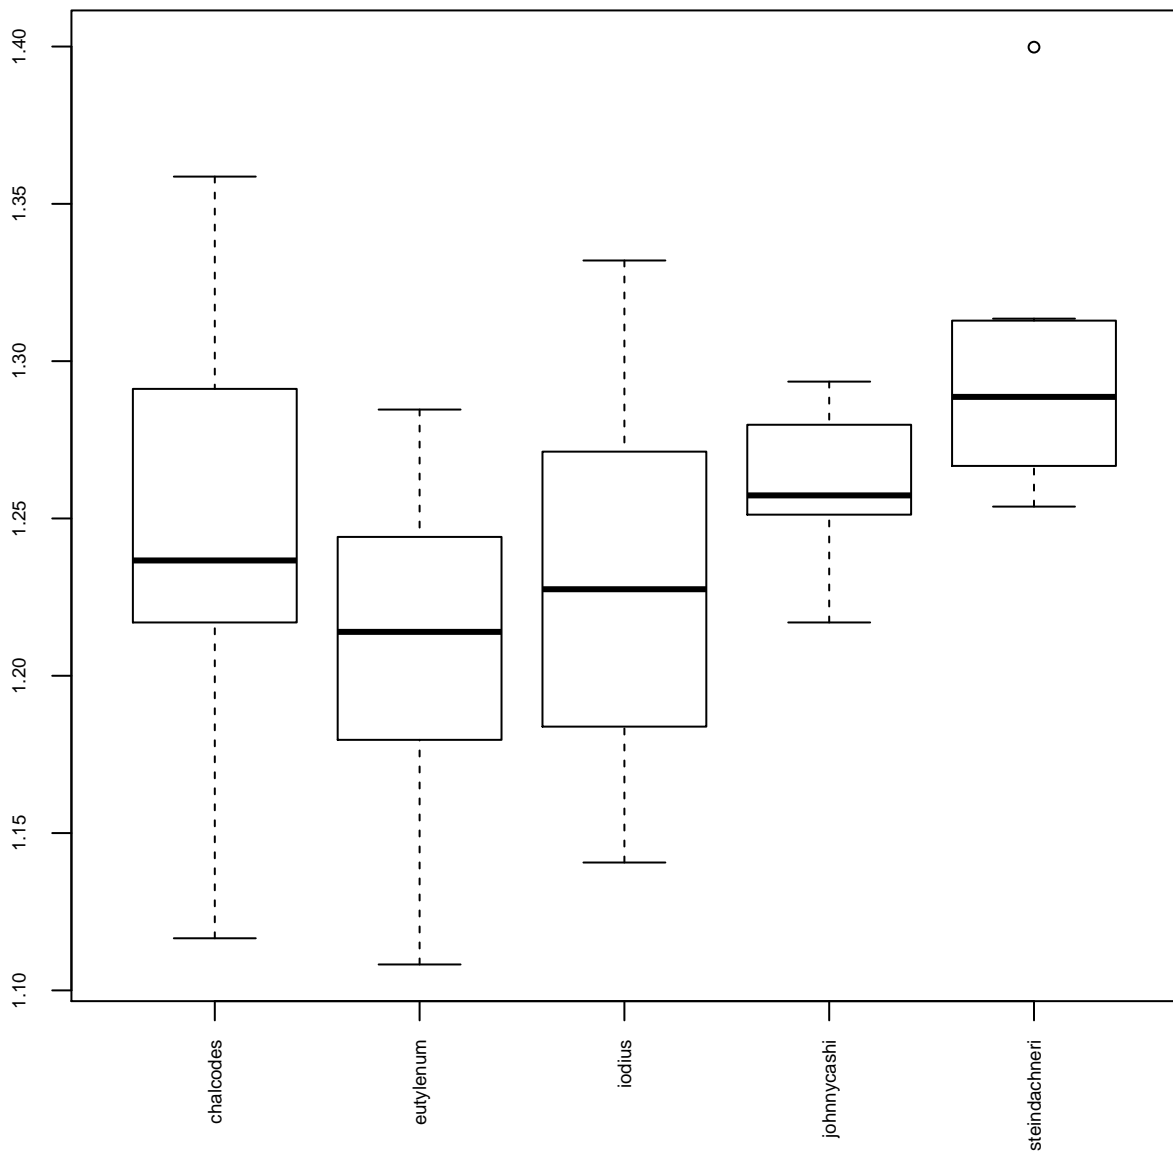

Supplement: Supplementary file 1442

# Tarsus 3/Femur 4 Length ratio – females

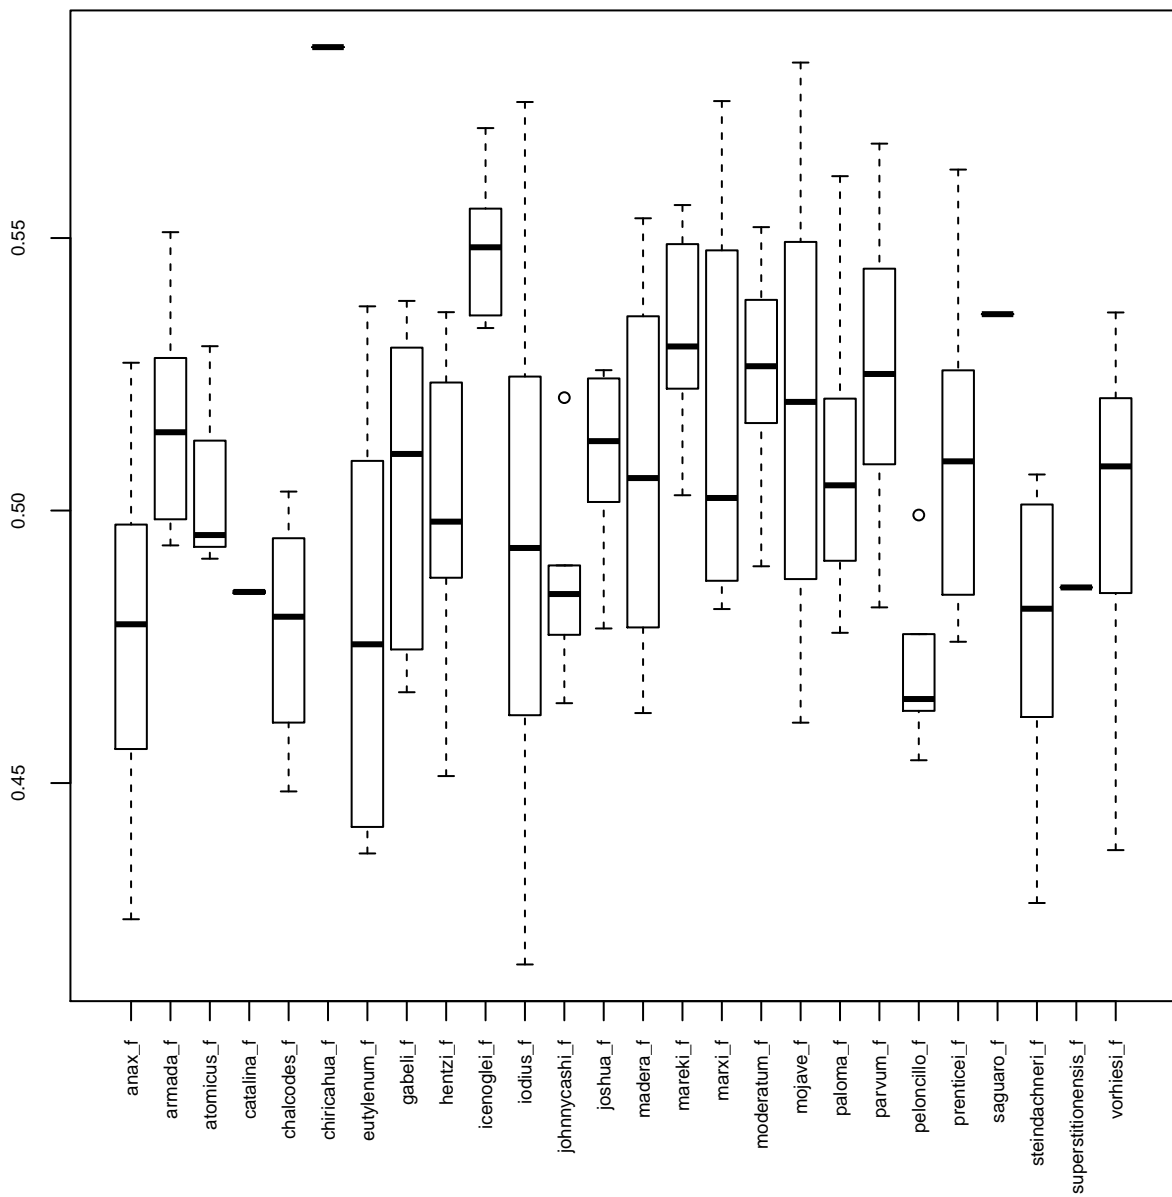

Supplement: Supplementary file 1443

# Metatarsus 1/Patella 3 Length ratio – males

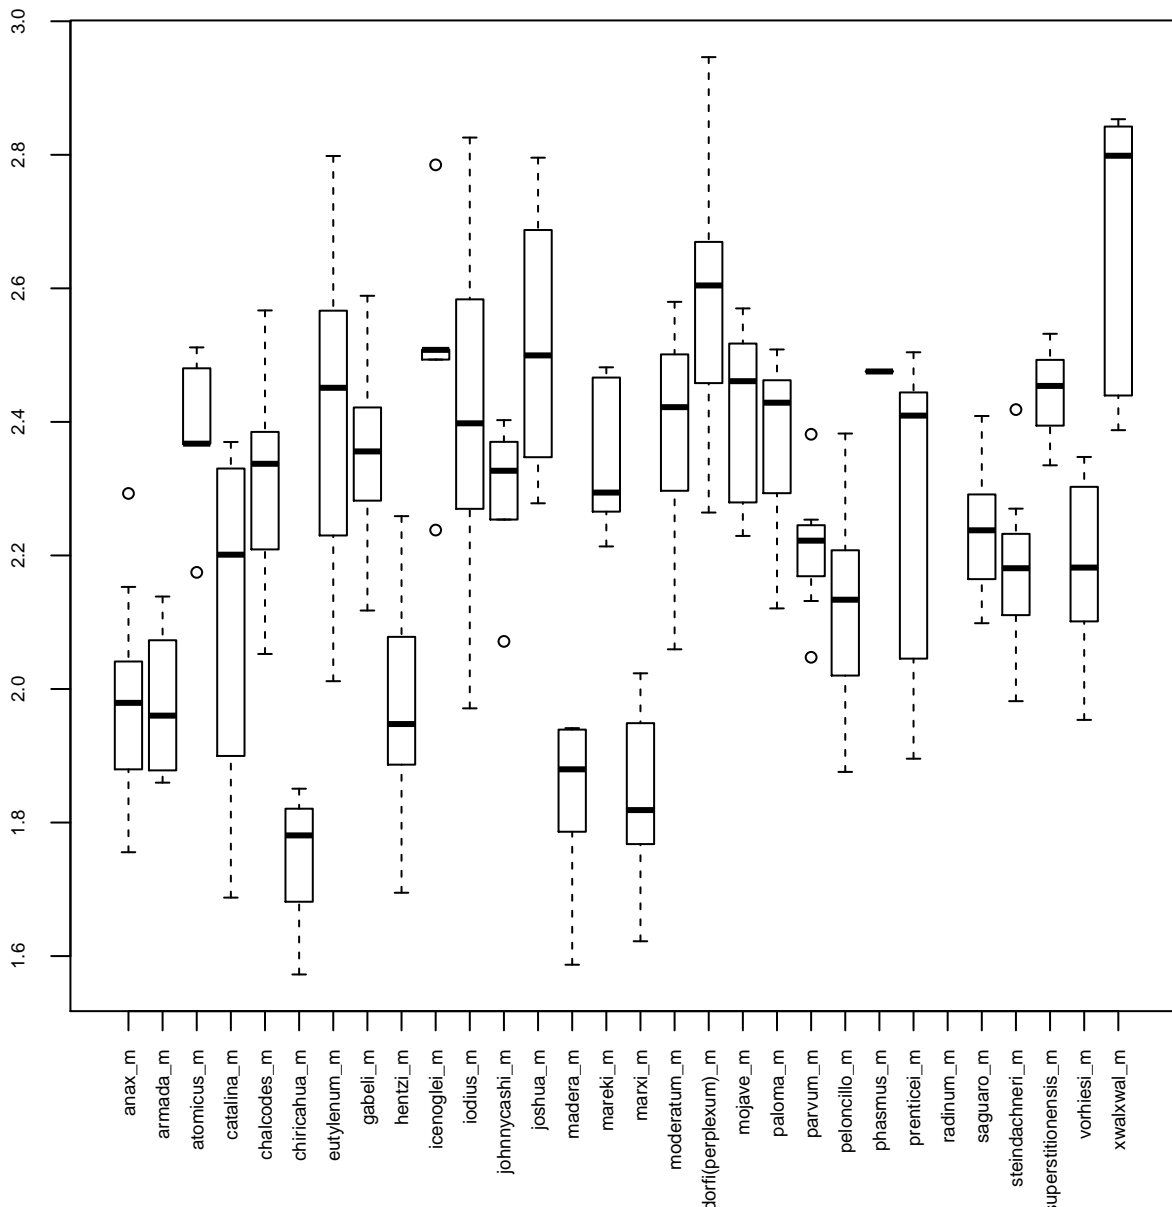

Supplement: Supplementary file 1444

## Carapace Length/Femur 1 ratio – females

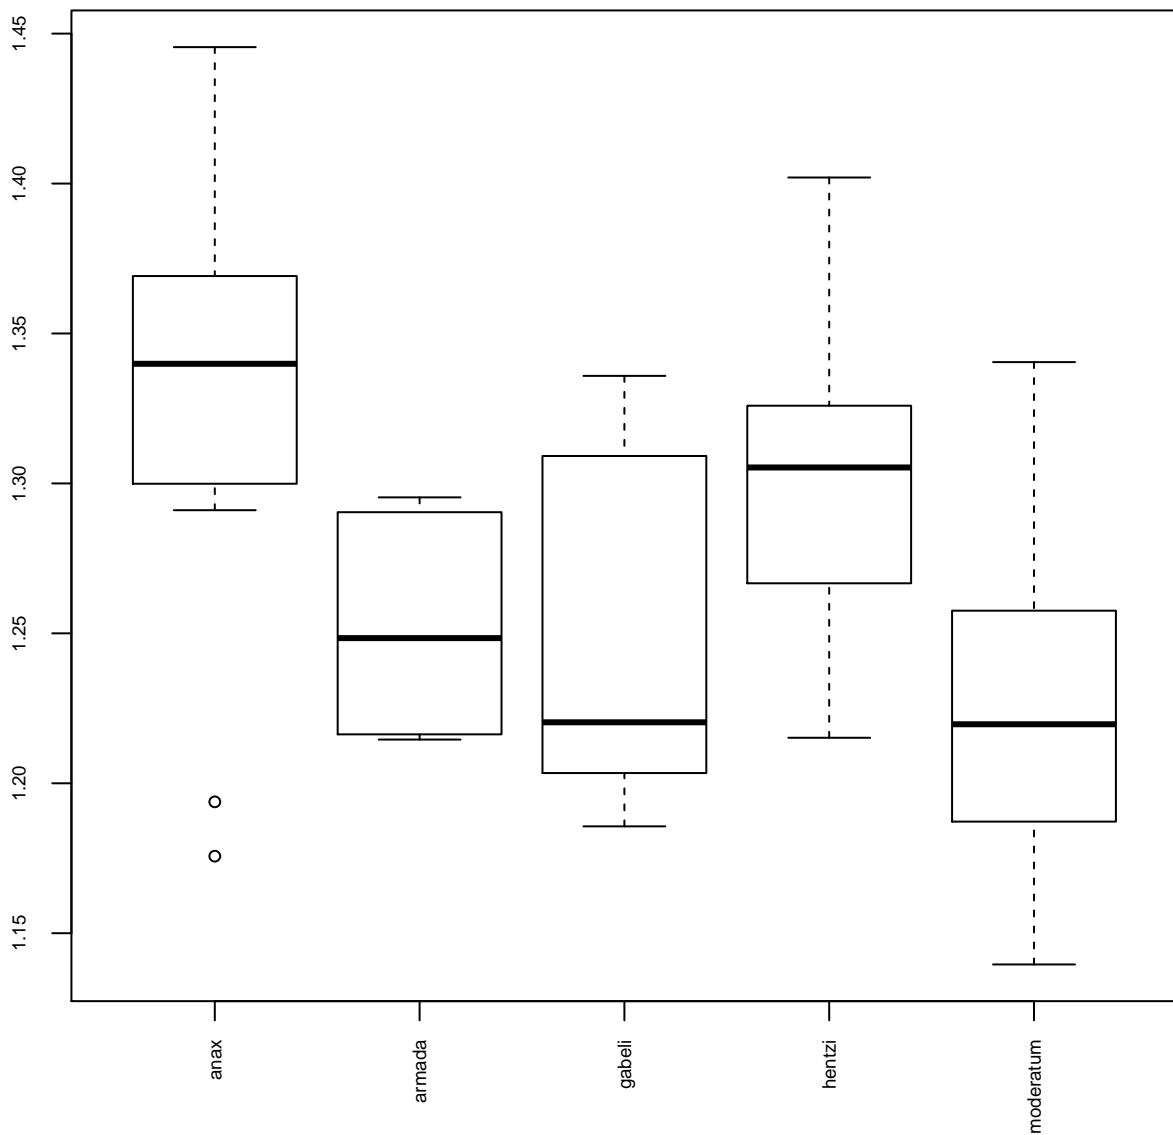

Supplement: Supplementary file 1445

# Tarsus 3/Metatarsus 4 Length ratio – females

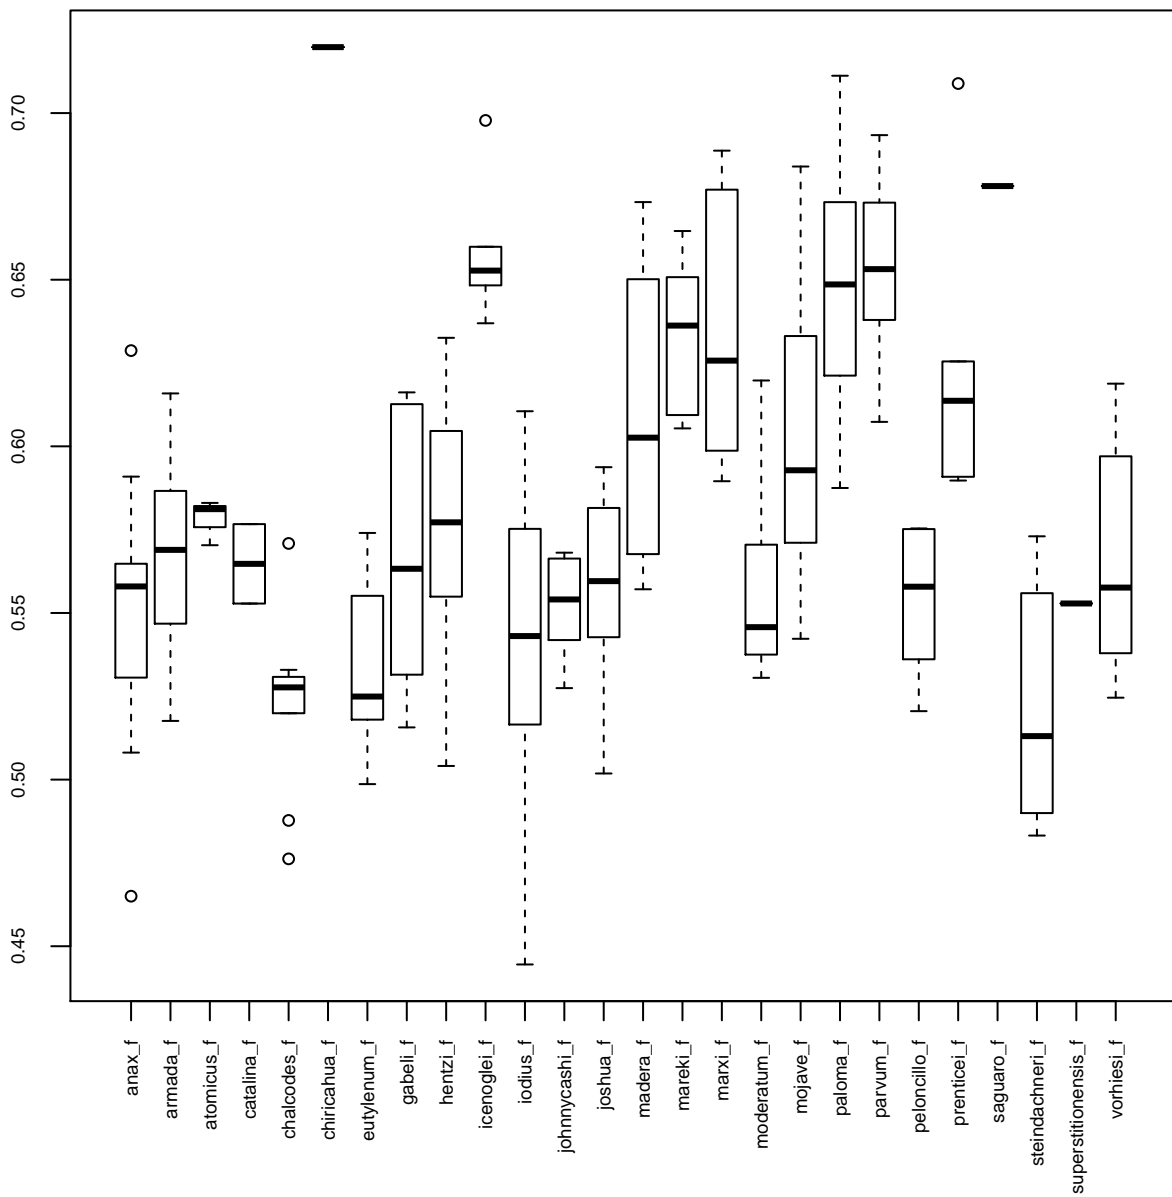

Supplement: Supplementary file 1446

## Carapace Length/Tibia 4 ratio – males

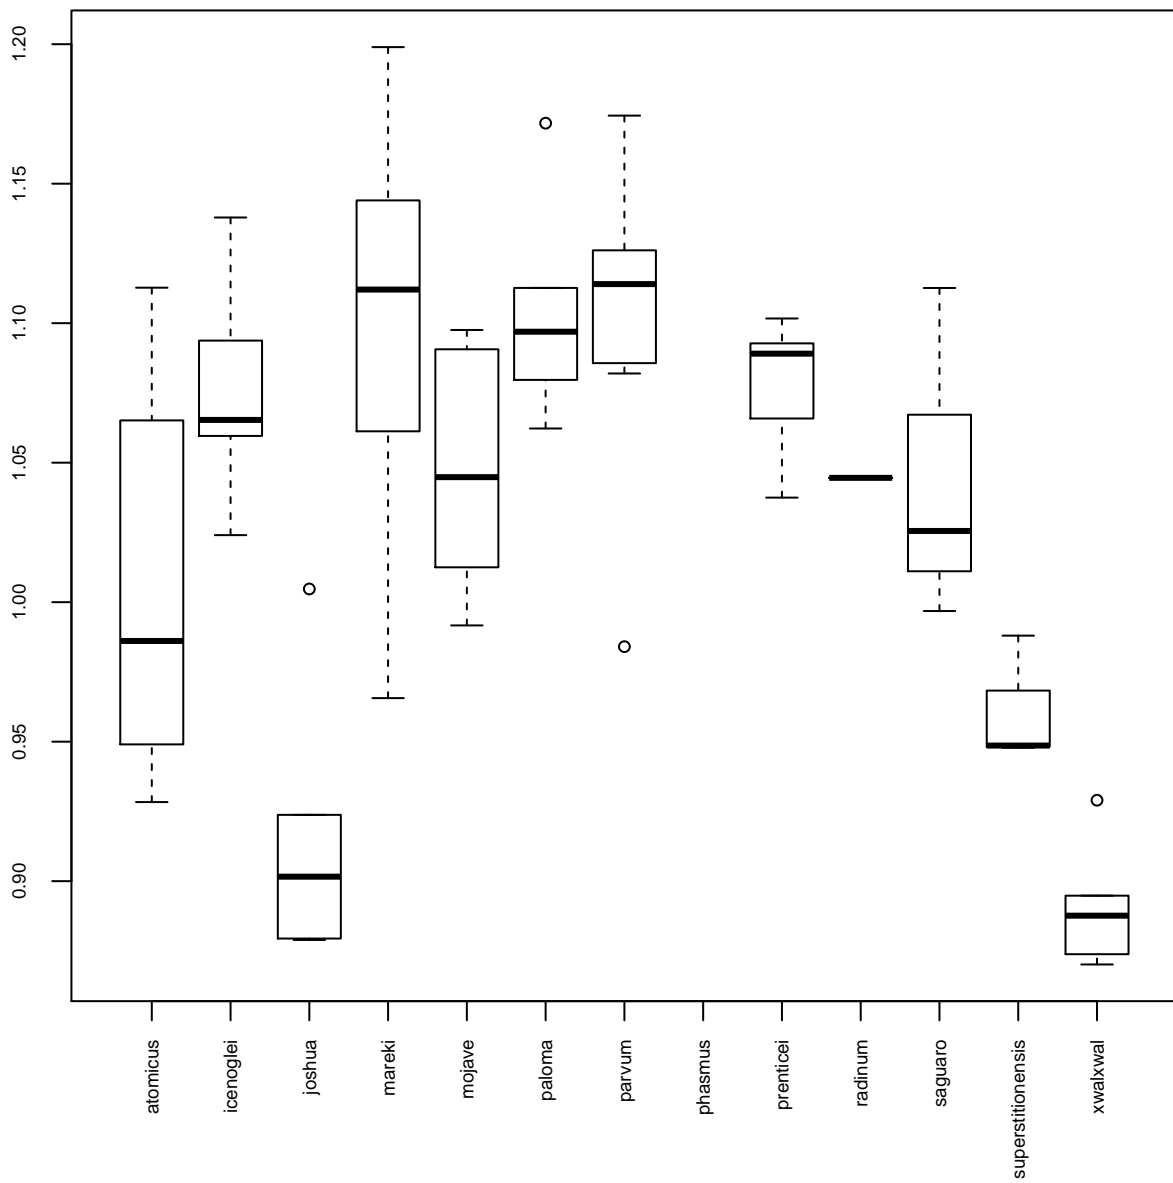

Supplement: Supplementary file 1447

# Tibia 1/Tarsus 1 ratio – males

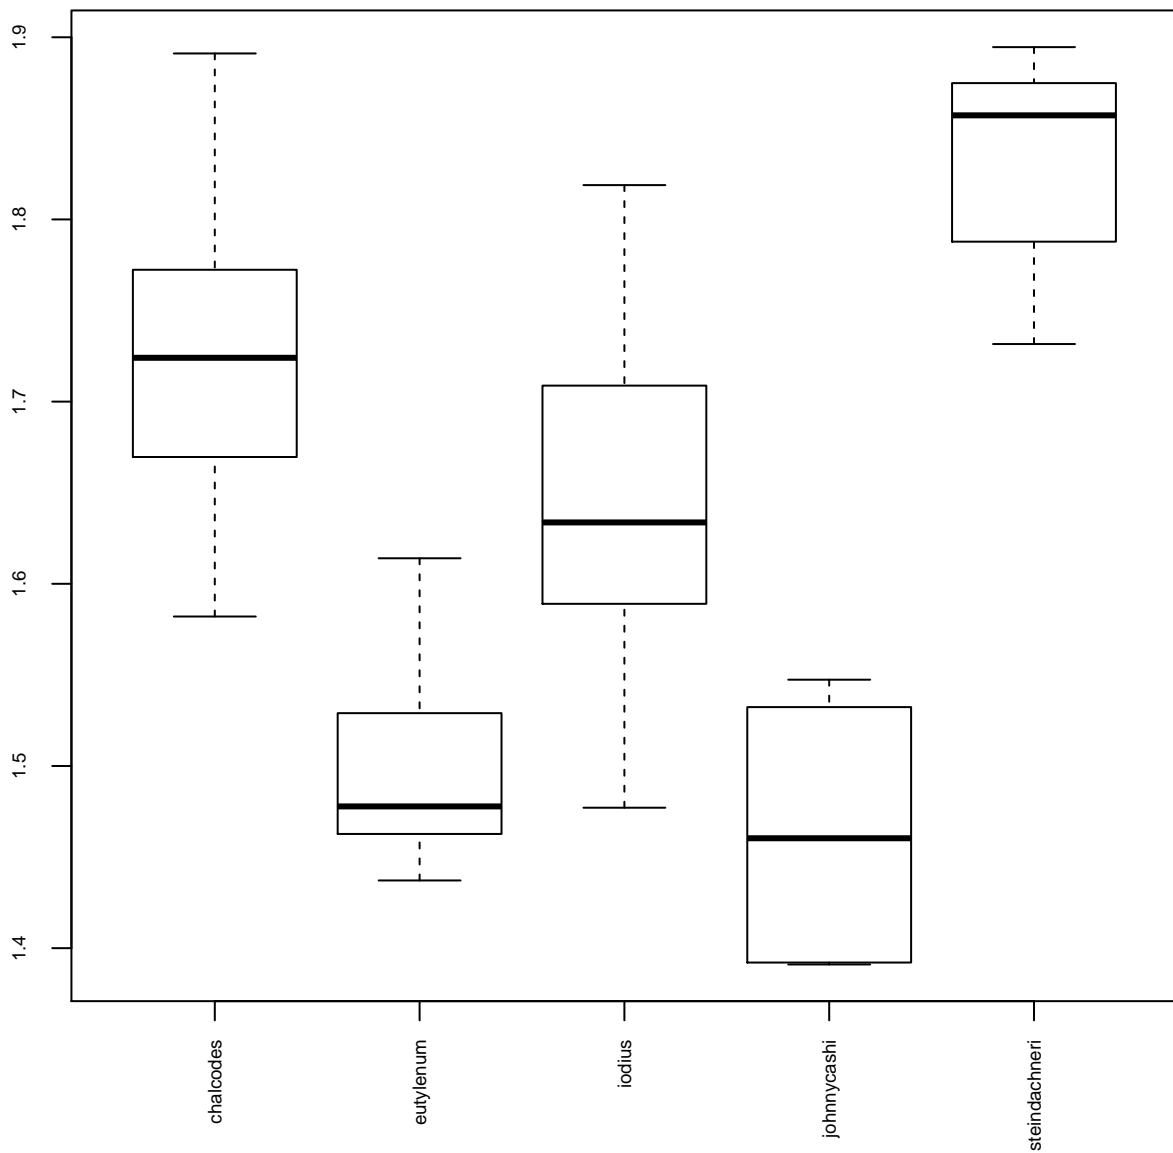

Supplement: Supplementary file 1448

## Metatarsus 1/Tibia 3 Length ratio – males

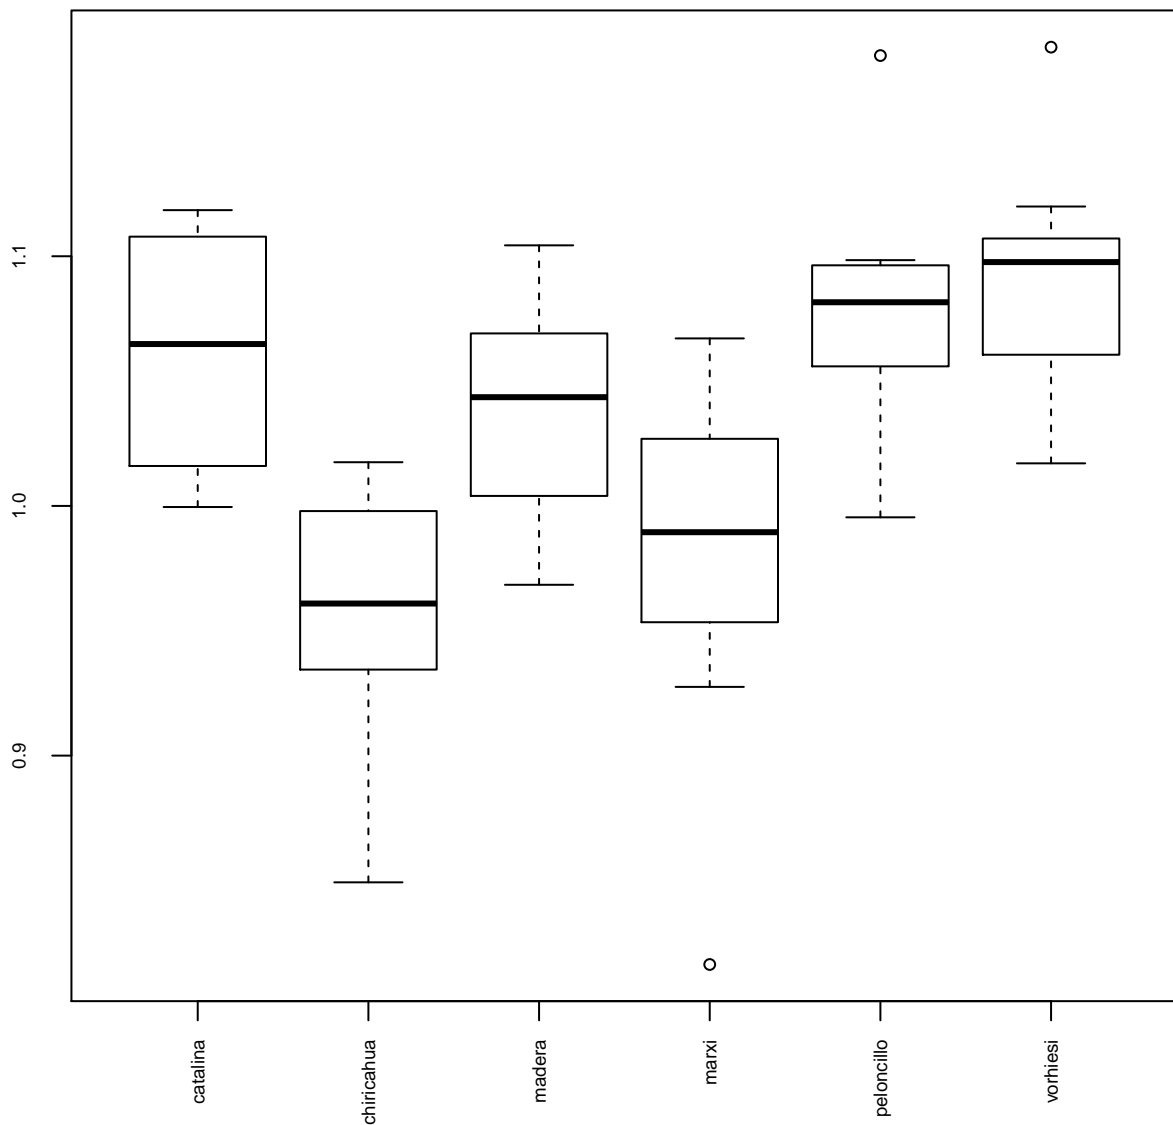

Supplement: Supplementary file 1449

# Patella 1/Femur 4 Length ratio – males

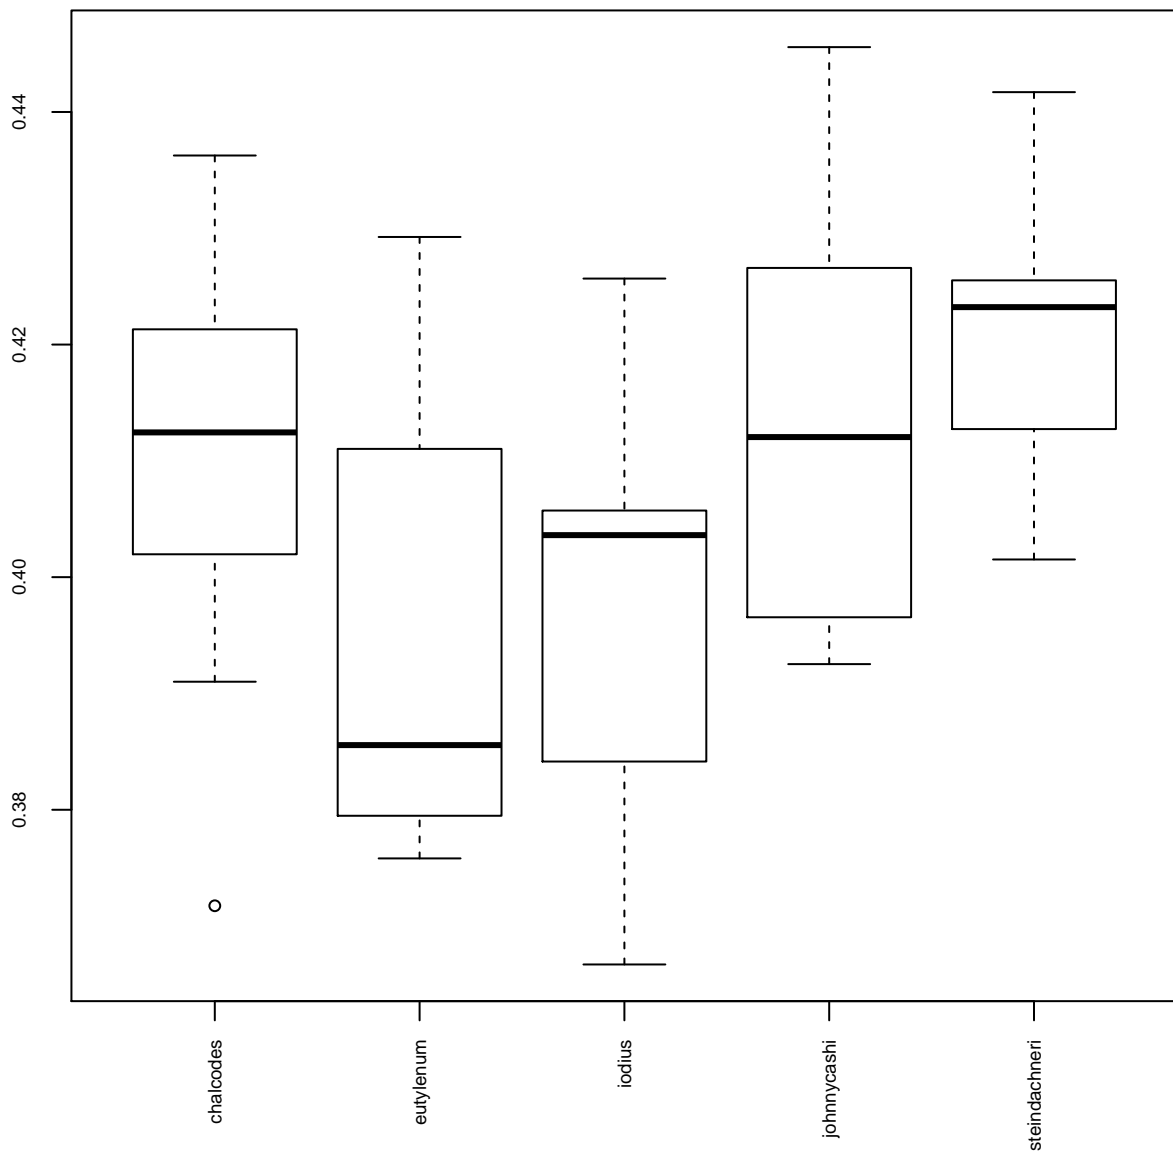

Supplement: Supplementary file 1450

## Femur 4/Patella 4 ratio – females

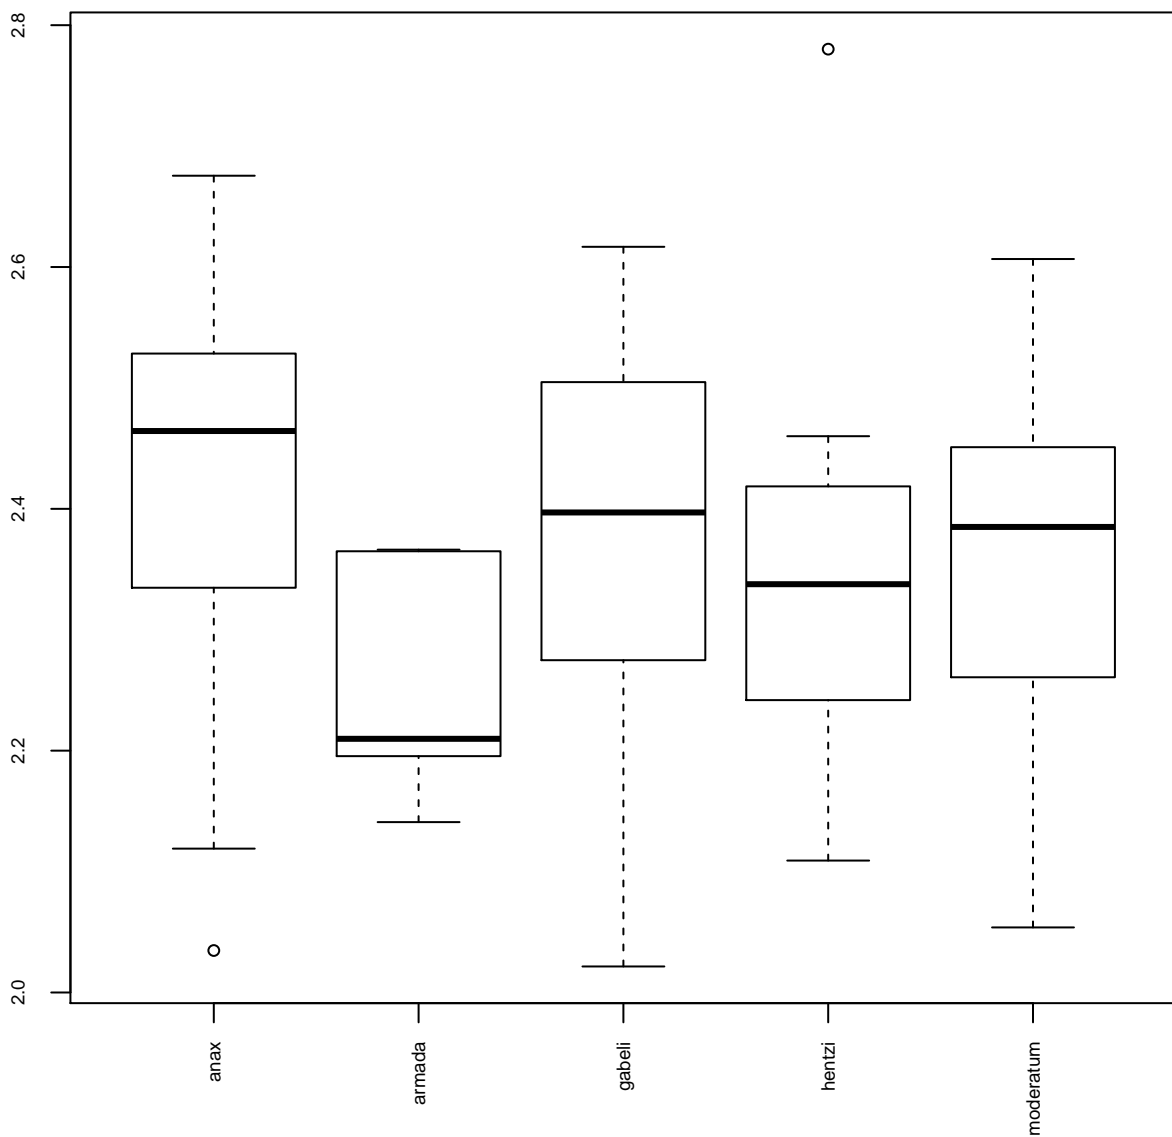

Supplement: Supplementary file 1451

## Carapace Length/Tibia 3 ratio – females

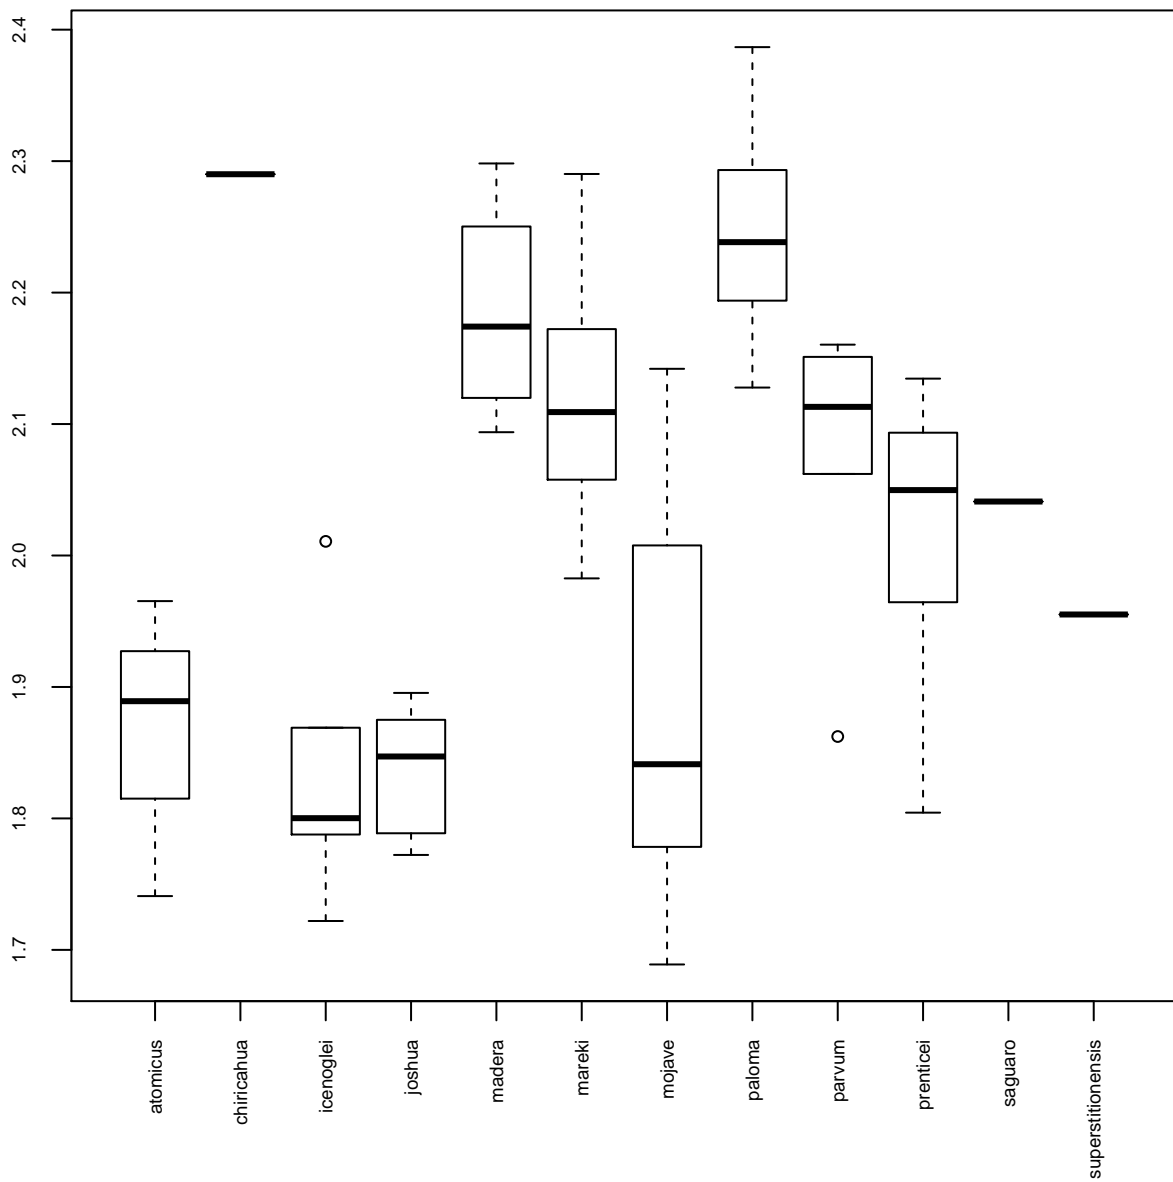

Supplement: Supplementary file 1452

## Tibia 1/Tibia 3 ratio – males

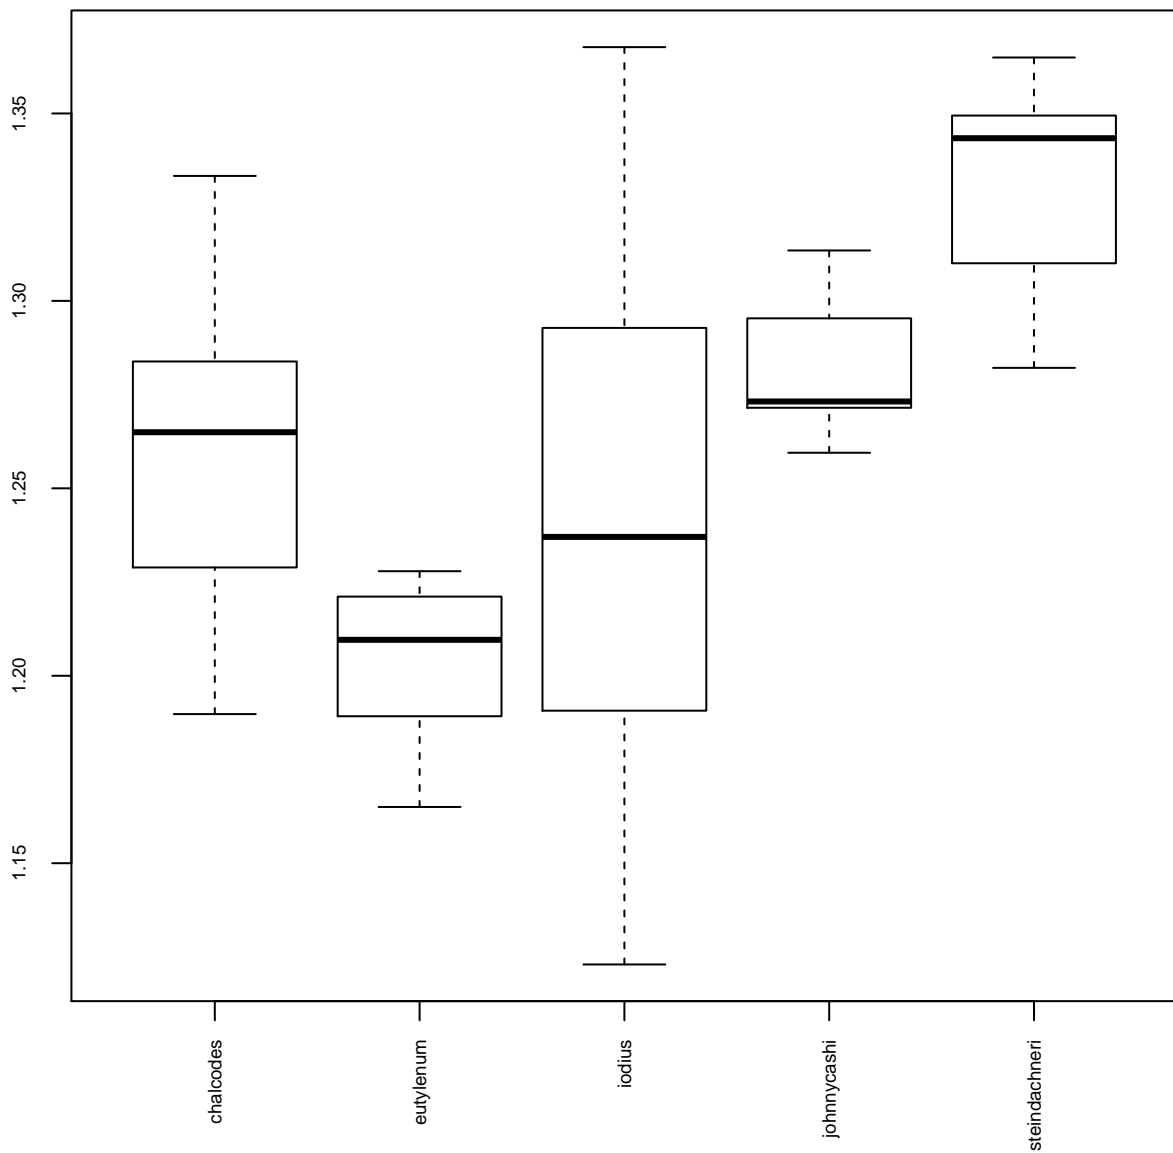

Supplement: Supplementary file 1453

## Femur 3 Length/Width ratio – males

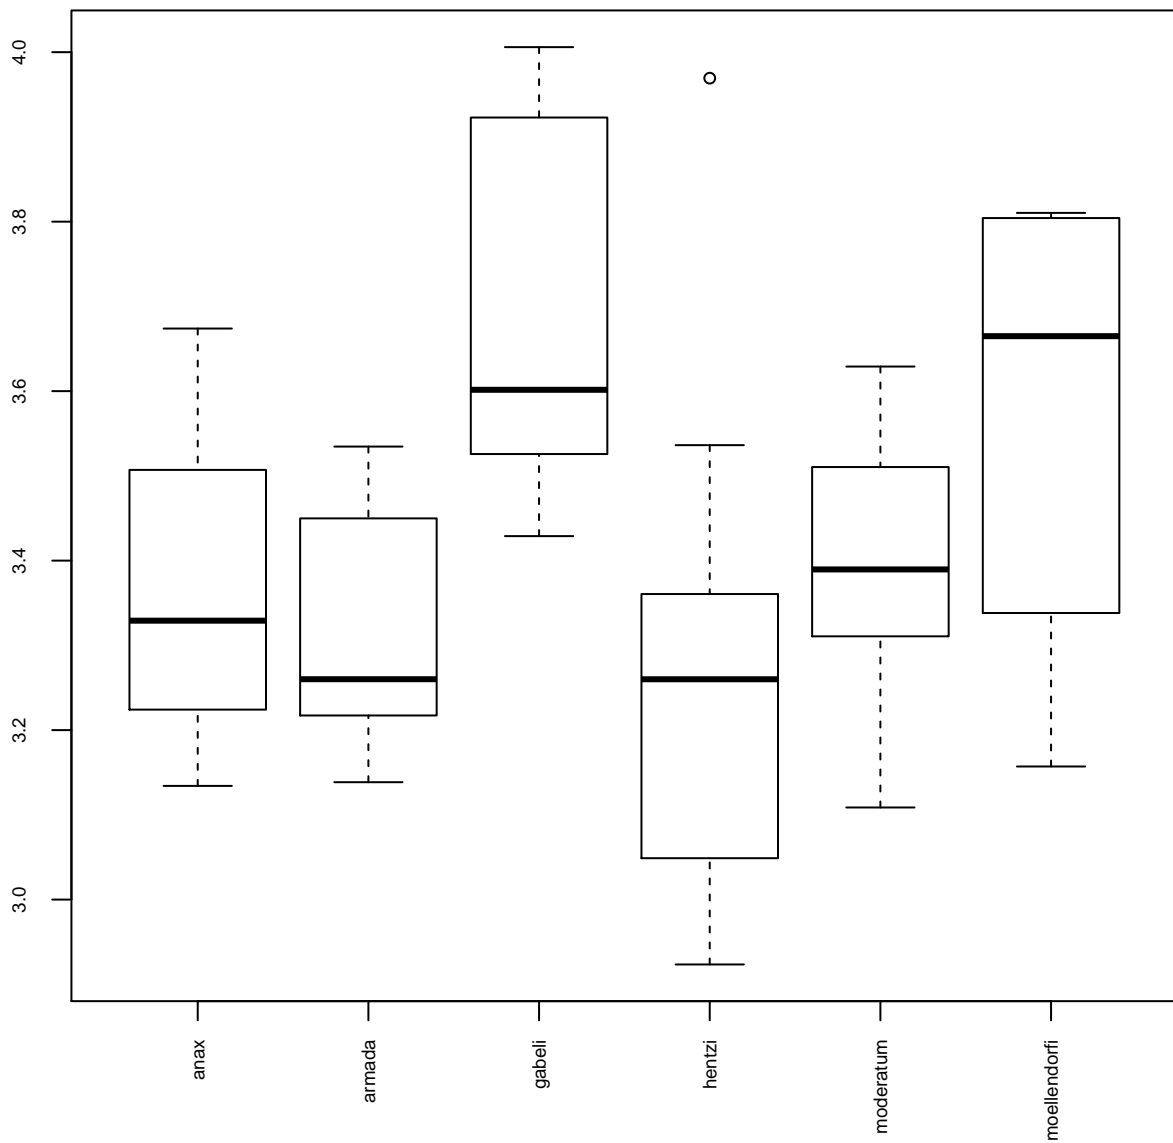

Supplement: Supplementary file 1454

## Palpal Tibia/Tarsus 4 Length ratio – males

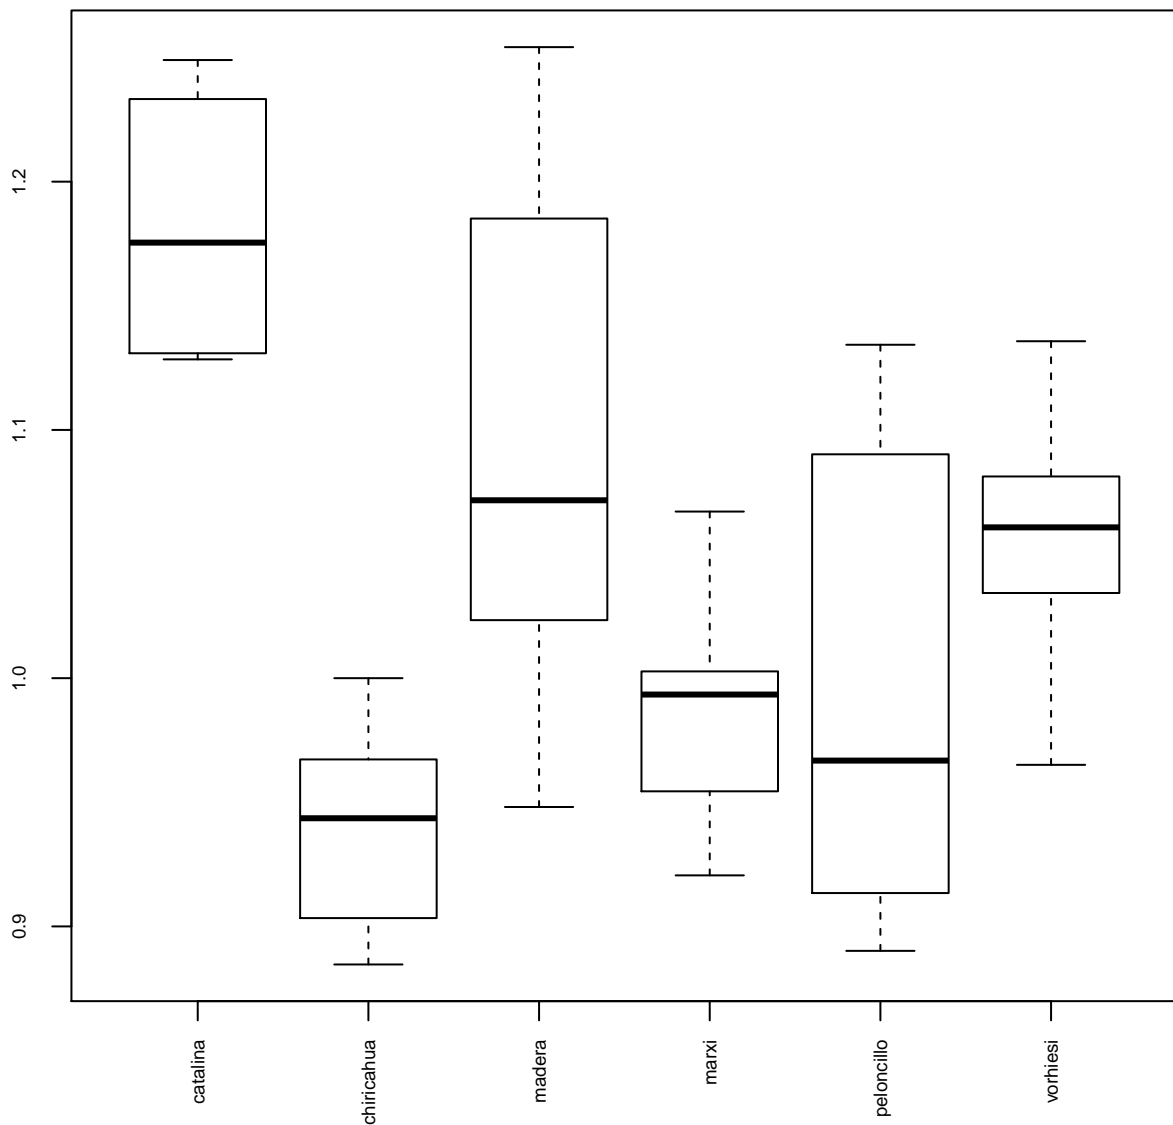

Supplement: Supplementary file 1455

## Metatarsus 4/Tarsus 4 ratio – males

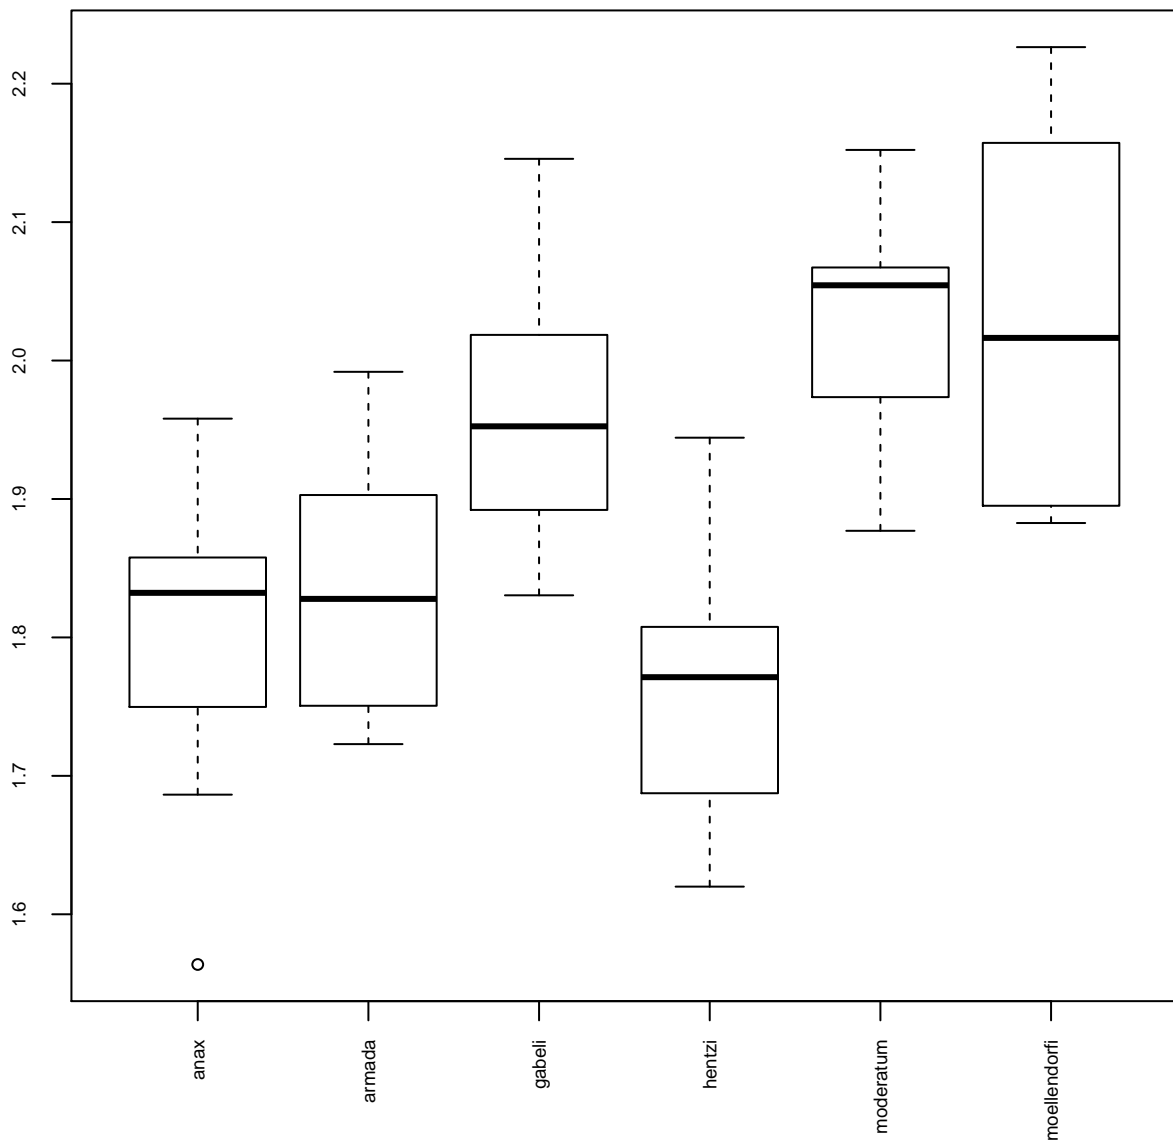

Supplement: Supplementary file 1456

## Tarsus 3/Metatarsus 4 Length ratio – males

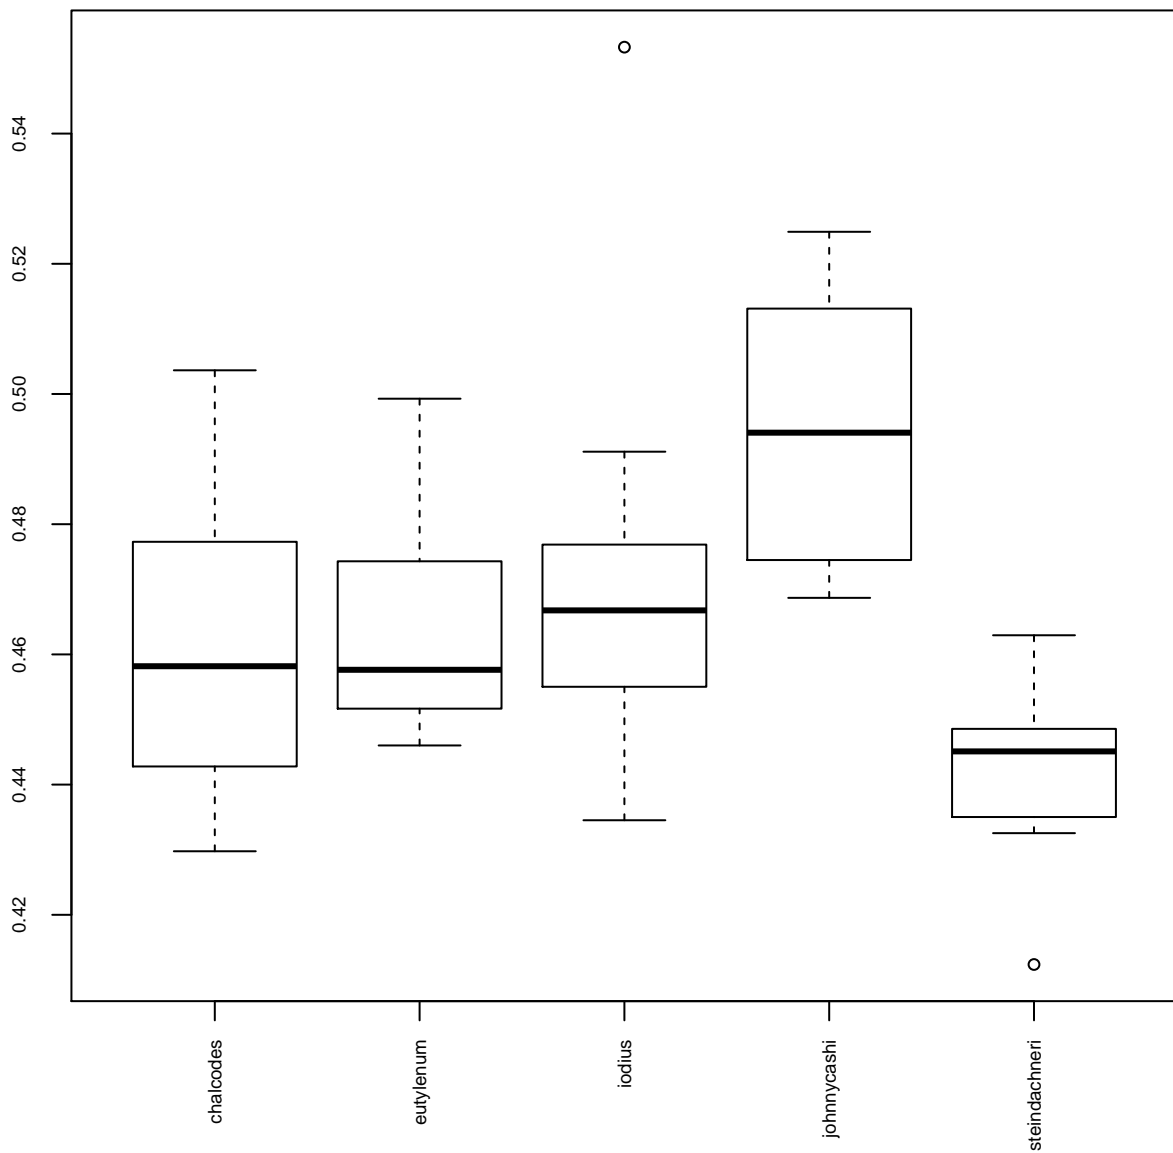

Supplement: Supplementary file 1457

# Metatarsus 1/Tarsus 4 Length ratio – males

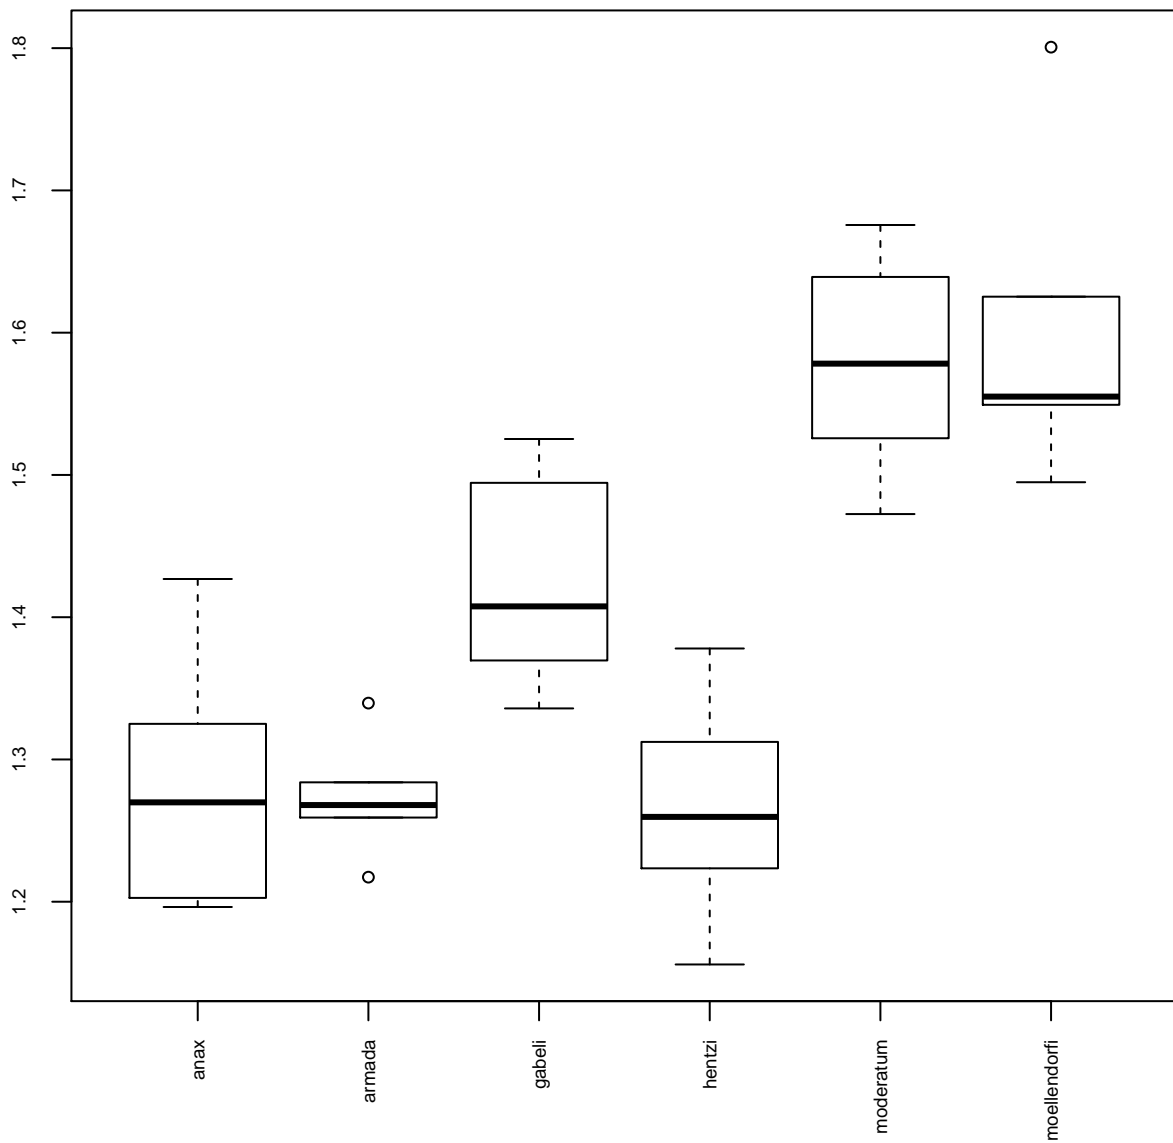

Supplement: Supplementary file 1458

## Tarsus 3/Patella 4 Length ratio – females

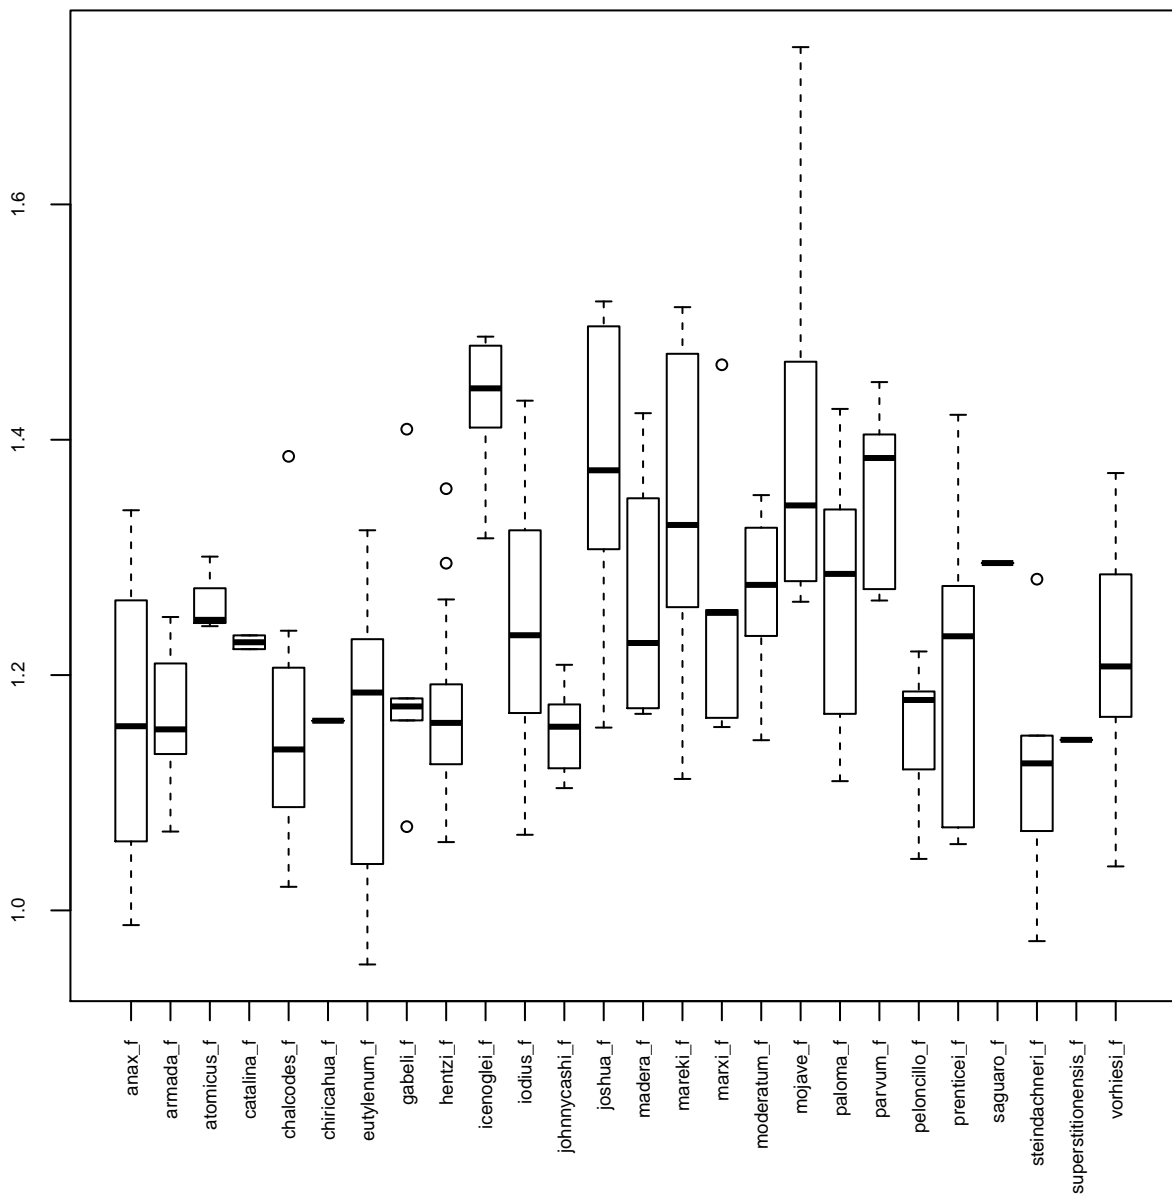

Supplement: Supplementary file 1459

## Carapace Length/Metatarsus 1 ratio – females

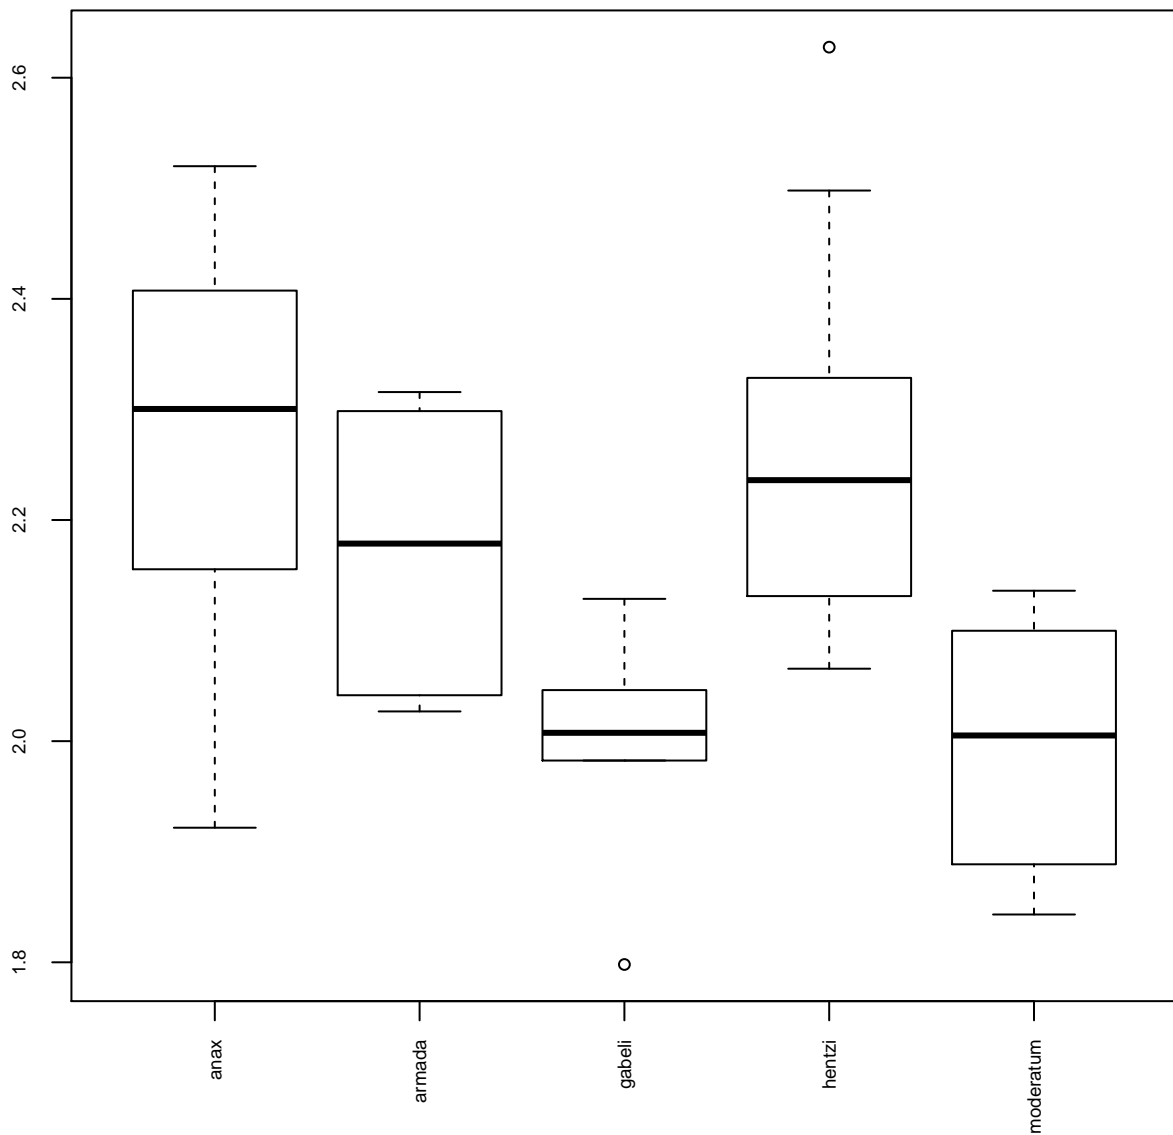

Supplement: Supplementary file 1460

## Palpal Tibia/Metatarsus 4 Length ratio – males

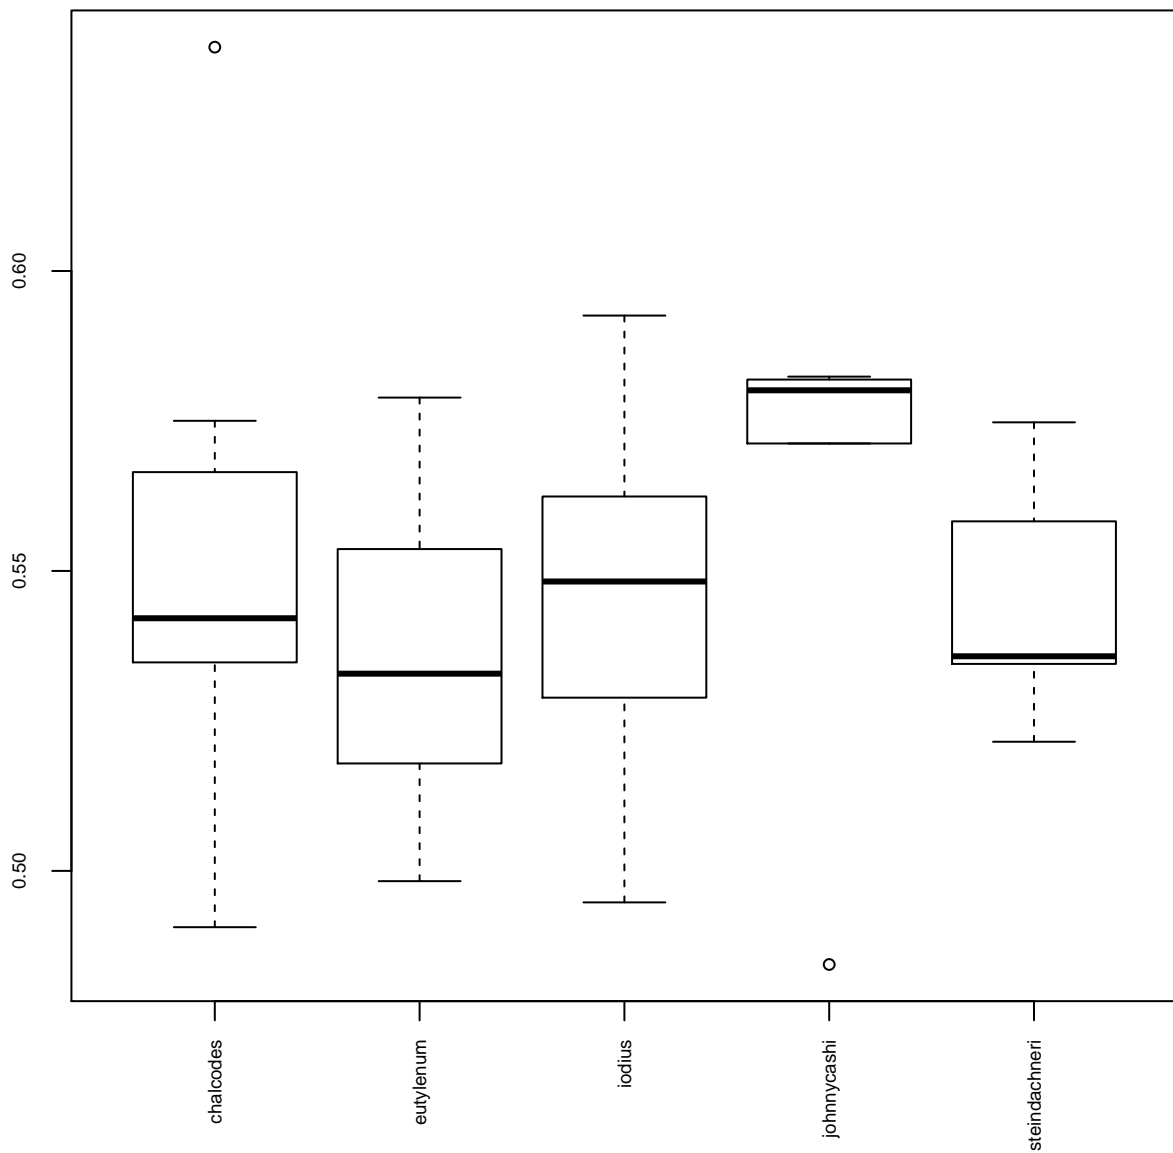

Supplement: Supplementary file 1461

# Tibia 3/Tarsus 4 Length ratio – males

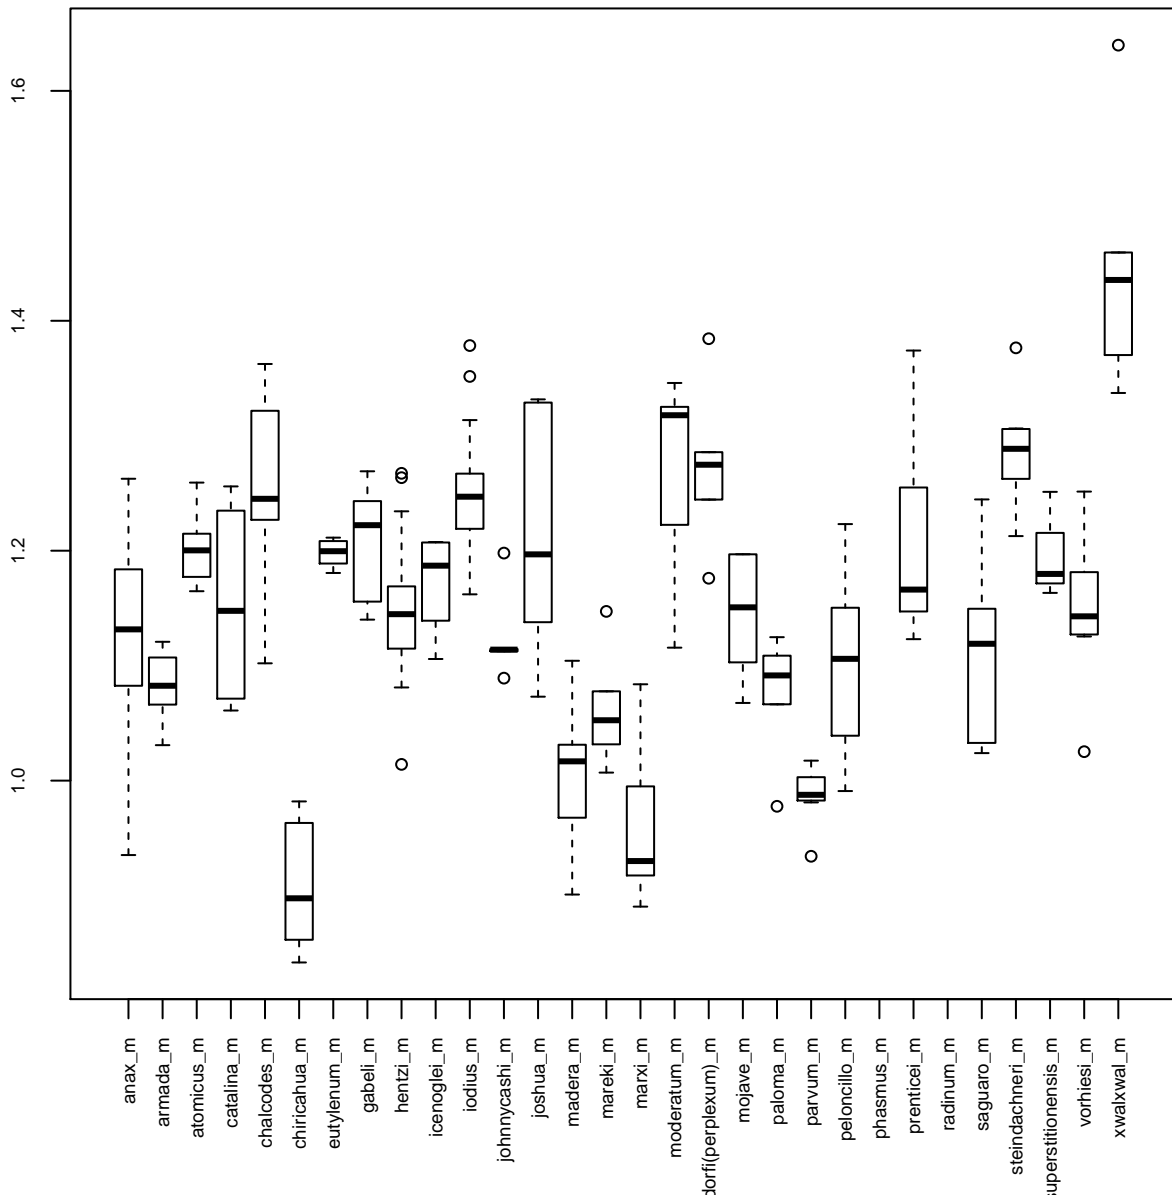

Supplement: Supplementary file 1462
